# Supplementary material for: Effects of Prenatal Exposure to Titanium Dioxide Nanoparticles on DNA Methylation and Gene Expression Profile in the Mouse Brain
Source: Front Toxicol. 2021 Oct 8;3:705910. doi: 10.3389/ftox.2021.705910 (PMC8915839; doi:10.3389/ftox.2021.705910)
Supplement: Supplementary file 5 [file Table2.pdf]

Supplementary Table 2. Alteration of DNA methylation state of the brain of male offspring prenatally exposed to TiO<sub>2</sub>-NP.

The relative DNA methylation was calculated by dividing Cy5 signal by Cy3 signal obtained from CpG island microarray and then compared between Sham and TiO<sub>2</sub>-NP groups.

| ProbeName      | Target position of probe on CpG island microarray | TargetID                 | GeneSymbol    | CpG island Description | Ratio of relative methylation (TiO <sub>2</sub> -NP/Vehicle) | Sham group                     |                    |                    | TiO <sub>2</sub> -H group      |                    |                    |
|----------------|---------------------------------------------------|--------------------------|---------------|------------------------|--------------------------------------------------------------|--------------------------------|--------------------|--------------------|--------------------------------|--------------------|--------------------|
|                |                                                   |                          |               |                        |                                                              | Relative methylation (Cy5/Cy3) | Cy3 signal (Input) | Cy5 signal (MeDIP) | Relative methylation (Cy5/Cy3) | Cy3 signal (Input) | Cy5 signal (MeDIP) |
| A_68_P32380514 | chrX:49518048-49518092                            | NM_008150:30             | Gpc4          | INSIDE                 | 61.524                                                       | 0.065                          | 1399.00            | 90.81              | 3.994                          | 1906.71            | 7614.88            |
| A_68_P32385499 | chrX:50410041-50410085                            | NR_029756:-2536          | Mir322        | PROMOTER               | 49.785                                                       | 0.204                          | 5800.27            | 1184.88            | 10.170                         | 6244.37            | 63505.16           |
| A_68_P32289745 | chrX:20281291-20281340                            | NM_145628:281            | Usp11         | INSIDE                 | 27.746                                                       | 0.147                          | 585.44             | 85.89              | 4.071                          | 955.71             | 3890.55            |
| A_68_P32321655 | chrX:34625187-34625231                            | NM_026055:-29            | Rpl39         | PROMOTER               | 21.396                                                       | 0.085                          | 1013.99            | 86.41              | 1.823                          | 1556.92            | 2838.82            |
| A_68_P32364066 | chrX:45698978-45699030                            | NM_178782:4470           | Bcor1         | INSIDE                 | 17.870                                                       | 0.299                          | 906.62             | 271.43             | 5.350                          | 1281.69            | 6857.13            |
| A_68_P27997513 | chr11:87861967-87862012                           | NM_001078167:817         | Srsf1         | INSIDE                 | 17.221                                                       | 0.140                          | 648.36             | 90.54              | 2.405                          | 447.32             | 1075.72            |
| A_68_P32328377 | chrX:35918417-35918470                            | NM_001110142:10930       | Cul4b         | INSIDE                 | 17.143                                                       | 0.162                          | 532.97             | 86.41              | 2.779                          | 814.00             | 2262.38            |
| A_68_P32341131 | chrX:39503134-39503178                            | NM_021465:-721           | Stag2         | PROMOTER               | 13.004                                                       | 0.178                          | 2207.41            | 393.97             | 2.321                          | 2820.54            | 6545.97            |
| A_68_P32240694 | chrX:7461707-7461754                              | NM_001083937:361         | Slc35a2       | INSIDE                 | 12.416                                                       | 0.120                          | 941.20             | 113.40             | 1.496                          | 1263.13            | 1889.59            |
| A_68_P32539364 | chrX:91786968-91787022                            | NM_019791:419            | Maged1        | INSIDE                 | 11.572                                                       | 0.339                          | 339.65             | 114.98             | 3.917                          | 412.04             | 1614.14            |
| A_68_P32395899 | chrX:53708448-53708501                            | NM_172779:459            | Ddx26b        | INSIDE                 | 11.436                                                       | 0.200                          | 465.56             | 93.05              | 2.286                          | 596.72             | 1363.81            |
| A_68_P32289746 | chrX:20281381-20281426                            | NM_145628:369            | Usp11         | INSIDE                 | 11.256                                                       | 0.505                          | 675.37             | 341.38             | 5.689                          | 884.13             | 5030.22            |
| A_68_P32553704 | chrX:96332183-96332227                            | NM_010110:736            | Efnb1         | INSIDE                 | 10.685                                                       | 0.064                          | 1361.04            | 87.02              | 0.683                          | 2035.53            | 1390.49            |
| A_68_P32241634 | chrX:7651662-7651714                              | NM_011514:198            | Suv39h1       | INSIDE                 | 10.451                                                       | 0.239                          | 364.48             | 87.10              | 2.498                          | 517.22             | 1291.81            |
| A_68_P32380515 | chrX:49518249-49518293                            | NM_008150:-170           | Gpc4          | PROMOTER               | 10.005                                                       | 0.221                          | 1132.83            | 250.79             | 2.215                          | 1539.10            | 3409.03            |
| A_68_P32403906 | chrX:55284045-55284104                            | NM_009575:270            | Zic3          | INSIDE                 | 9.281                                                        | 0.334                          | 328.10             | 109.52             | 3.098                          | 667.60             | 2068.30            |
| A_68_P32364052 | chrX:45697351-45697395                            | NM_178782:2838           | Bcor1         | INSIDE                 | 9.266                                                        | 0.194                          | 506.06             | 98.31              | 1.800                          | 745.77             | 1342.50            |
| A_68_P32691812 | chrX:135449017-135449063                          | NM_013724:72             | Nrk           | INSIDE                 | 8.865                                                        | 0.368                          | 493.89             | 181.82             | 3.264                          | 842.52             | 2749.69            |
| A_68_P32462127 | chrX:70588115-70588159                            | NM_001160229:177         | Zfp275        | INSIDE                 | 8.456                                                        | 0.519                          | 2966.77            | 1538.49            | 4.385                          | 3385.03            | 14843.76           |
| A_68_P32798240 | chrX:160857773-160857818                          | NM_011081:77             | Piga          | INSIDE                 | 8.287                                                        | 0.056                          | 1524.74            | 85.80              | 0.466                          | 2229.20            | 1039.60            |
| A_68_P32364768 | chrX:45807315-45807359                            | NM_019680:8973           | Elf4          | INSIDE                 | 8.200                                                        | 0.167                          | 1849.80            | 308.14             | 1.366                          | 2377.43            | 3247.39            |
| A_68_P32260250 | chrX:11654399-11654443                            | NM_029510:3259           | Bcor          | INSIDE                 | 8.005                                                        | 0.077                          | 3083.96            | 237.31             | 0.616                          | 3350.61            | 2063.97            |
| A_68_P32240898 | chrX:7499680-7499725                              | NM_013892:2755           | Pcsk1n        | INSIDE                 | 6.679                                                        | 0.245                          | 824.75             | 202.36             | 1.639                          | 1055.20            | 1729.15            |
| A_68_P32239706 | chrX:7274518-7274562                              | NM_173747:281            | Gpkow         | INSIDE                 | 6.175                                                        | 0.327                          | 901.99             | 295.18             | 2.021                          | 1162.22            | 2348.67            |
| A_68_P32543330 | chrX:93163948-93164001                            | chrX:93163948-93164001   | Unknown       | Unknown                | 6.123                                                        | 1.578                          | 867.83             | 1369.34            | 9.662                          | 918.74             | 8876.91            |
| A_68_P32238978 | chrX:7151494-7151538                              | NM_138605:-270           | Ppp1r3f       | DIVERGENT_PROMOTER     | 5.965                                                        | 0.429                          | 1256.22            | 539.47             | 2.562                          | 1721.03            | 4408.97            |
| A_68_P32742985 | chrX:147247678-147247726                          | NM_001199246:544         | Maged2        | INSIDE                 | 5.935                                                        | 0.285                          | 892.44             | 254.21             | 1.691                          | 1026.15            | 1734.92            |
| A_68_P32378025 | chrX:49034174-49034218                            | NM_015819:-542           | Hs6p2         | PROMOTER               | 5.909                                                        | 0.369                          | 513.47             | 189.23             | 2.178                          | 863.98             | 1881.51            |
| A_68_P32507213 | chrX:83022104-83022148                            | NM_008194:32             | Gyk           | INSIDE                 | 5.864                                                        | 0.336                          | 2422.30            | 813.29             | 1.969                          | 2706.02            | 5327.99            |
| A_68_P32576278 | chrX:101395079-101395123                          | NM_001077354:1356        | C77370        | INSIDE                 | 5.811                                                        | 0.451                          | 392.85             | 177.07             | 2.619                          | 482.00             | 1262.41            |
| A_68_P32717148 | chrX:140752921-140752965                          | NM_026247:434            | Algl3         | INSIDE                 | 5.797                                                        | 0.491                          | 4385.26            | 2155.07            | 2.849                          | 5164.89            | 14713.45           |
| A_68_P32340124 | chrX:39264668-39264712                            | NM_001033422:388         | Thoc2         | INSIDE                 | 5.531                                                        | 0.379                          | 789.49             | 299.23             | 2.096                          | 1208.76            | 2534.12            |
| A_68_P32369309 | chrX:46847140-46847184                            | NM_001081123:23536       | Arhgap36      | INSIDE                 | 5.435                                                        | 0.128                          | 2155.34            | 275.35             | 0.694                          | 2870.86            | 1993.46            |
| A_68_P32156055 | chr17:56568653-56568712                           | NM_011218:47221          | Ptprs         | INSIDE                 | 5.356                                                        | 3.108                          | 245.36             | 762.48             | 16.645                         | 231.78             | 3857.90            |
| A_68_P24904451 | chr6:142363030-142363089                          | NM_145572:58570          | Gys2          | DOWNSTREAM             | 5.355                                                        | 0.662                          | 863.47             | 571.55             | 3.545                          | 537.27             | 1904.41            |
| A_68_P32598389 | chrX:108010047-108010091                          | NM_008091:265            | Pou3f4        | INSIDE                 | 5.265                                                        | 0.298                          | 3935.65            | 1171.48            | 1.567                          | 4717.83            | 7394.34            |
| A_68_P32709179 | chrX:139116571-139116615                          | NM_001199360:324         | Tmem164       | INSIDE                 | 5.083                                                        | 0.468                          | 2513.19            | 1176.81            | 2.380                          | 3268.80            | 7779.73            |
| A_68_P32399260 | chrX:54306606-54306650                            | NM_028242:-118           | Htatsf1       | PROMOTER               | 4.864                                                        | 0.135                          | 1244.97            | 168.41             | 0.658                          | 1743.33            | 1147.10            |
| A_68_P32240442 | chrX:7418743-7418787                              | NM_138604:-192           | Otdud5        | PROMOTER               | 4.783                                                        | 0.117                          | 2334.38            | 273.05             | 0.559                          | 3436.31            | 1922.30            |
| A_68_P25015938 | chr7:27964028-27964072                            | NM_029391:-148           | Rab4b         | PROMOTER               | 4.680                                                        | 0.126                          | 4937.38            | 624.26             | 0.592                          | 2873.46            | 1700.28            |
| A_68_P32241074 | chrX:7524906-7524950                              | NM_001130416:87          | Hdac6         | INSIDE                 | 4.492                                                        | 0.607                          | 3825.27            | 2320.66            | 2.725                          | 4633.10            | 12626.24           |
| A_68_P32601449 | chrX:109009111-109009155                          | chrX:109009111-109009155 | Unknown       | Unknown                | 4.434                                                        | 0.330                          | 1963.34            | 647.03             | 1.461                          | 2907.10            | 4247.92            |
| A_68_P32806533 | chrX:162917564-162917608                          | NM_019773:213            | Rab9          | INSIDE                 | 4.426                                                        | 0.339                          | 1345.44            | 456.69             | 1.502                          | 1695.97            | 2548.07            |
| A_68_P32788273 | chrX:158597915-158597959                          | NM_001081052:-214        | Nhs           | PROMOTER               | 4.380                                                        | 0.464                          | 411.34             | 190.82             | 2.032                          | 592.38             | 1203.58            |
| A_68_P32262594 | chrX:12164926-12164970                            | NM_027439:64             | Atp6ap2       | INSIDE                 | 4.317                                                        | 0.101                          | 1878.74            | 190.33             | 0.437                          | 2616.86            | 1144.46            |
| A_68_P21101982 | chr2:30093777-30093821                            | NM_177725:510            | Lrrc8a        | INSIDE                 | 4.251                                                        | 1.957                          | 955.12             | 1869.22            | 8.320                          | 574.18             | 4777.13            |
| A_68_P20416033 | chr1:89051506-89051553                            | NM_021306:73             | Ecel1         | INSIDE                 | 4.247                                                        | 0.146                          | 1120.48            | 163.91             | 0.621                          | 1467.78            | 911.93             |
| A_68_P27311664 | chr10:85484474-85484519                           | NM_153195:-177           | Fbxo7         | DIVERGENT_PROMOTER     | 4.235                                                        | 0.674                          | 2000.06            | 1348.16            | 2.854                          | 1567.98            | 4475.60            |
| A_68_P22063505 | chr3:37318090-37318134                            | NM_153561:400            | Nudt6         | INSIDE                 | 4.156                                                        | 0.120                          | 2067.96            | 247.88             | 0.498                          | 1795.61            | 894.47             |
| A_68_P25933298 | chr8:69010075-69010123                            | NM_025465:308            | 1810029B16Rik | INSIDE                 | 4.022                                                        | 1.912                          | 403.87             | 772.20             | 7.690                          | 290.64             | 2235.19            |
| A_68_P31599408 | chr18:31920327-31920372                           | NM_153515:816            | Ammecr11      | INSIDE                 | 3.933                                                        | 0.506                          | 964.60             | 487.95             | 1.990                          | 689.52             | 1371.92            |
| A_68_P32767191 | chrX:154036331-154036375                          | NM_172307:295            | Mbtps2        | INSIDE                 | 3.803                                                        | 0.459                          | 567.72             | 260.66             | 1.746                          | 880.69             | 1537.88            |
| A_68_P32786690 | chrX:158346840-158346884                          | NM_001081052:250860      | Nhs           | INSIDE                 | 3.772                                                        | 0.436                          | 477.00             | 207.86             | 1.644                          | 686.46             | 1128.29            |
| A_68_P22372025 | chr3:100726540-100726584                          | NM_001165953:147         | Trim45        | INSIDE                 | 3.751                                                        | 0.092                          | 5529.70            | 508.00             | 0.345                          | 3495.54            | 1204.59            |
| A_68_P32465511 | chrX:71167531-71167575                            | NM_001164704:8637        | Renbp         | INSIDE                 | 3.621                                                        | 0.192                          | 1381.64            | 264.79             | 0.694                          | 1856.56            | 1288.37            |
| A_68_P32289747 | chrX:20281555-20281599                            | NM_145628:542            | Usp11         | INSIDE                 | 3.597                                                        | 0.193                          | 1625.82            | 314.34             | 0.696                          | 2294.48            | 1595.85            |
| A_68_P32321494 | chrX:34588841-34588885                            | NM_173779:23             | Ankrd58       | INSIDE                 | 3.596                                                        | 0.508                          | 536.14             | 272.46             | 1.827                          | 800.77             | 1463.16            |
| A_68_P32363782 | chrX:45639057-45639101                            | NM_028276:28968          | Utp14a        | DOWNSTREAM             | 3.521                                                        | 0.176                          | 1319.61            | 232.35             | 0.620                          | 1763.97            | 1093.58            |
| A_68_P23720362 | chr5:58110309-58110354                            | NM_018764:1072           | Pcdh7         | INSIDE                 | 3.482                                                        | 0.639                          | 2287.11            | 1460.71            | 2.224                          | 1835.76            | 4082.13            |
| A_68_P32678078 | chrX:132277552-132277596                          | NM_001009575:344         | Armcx5        | INSIDE                 | 3.479                                                        | 0.513                          | 1635.75            | 839.37             | 1.785                          | 2346.21            | 4187.96            |
| A_68_P32340722 | chrX:39421221-39421265                            | NM_009688:230            | Xiap          | INSIDE                 | 3.424                                                        | 0.695                          | 1431.58            | 994.36             | 2.378                          | 1849.87            | 4399.72            |

| ProbeName      | Target position of probe on CpG island microarray | TargetID                | GeneSymbol    | CpG island Description | Ratio of relative methylation (TiO <sub>2</sub> -NP/Vehicle) | Sham group                     |                    |                    | TiO <sub>2</sub> -H group      |                    |                    |
|----------------|---------------------------------------------------|-------------------------|---------------|------------------------|--------------------------------------------------------------|--------------------------------|--------------------|--------------------|--------------------------------|--------------------|--------------------|
|                |                                                   |                         |               |                        |                                                              | Relative methylation (Cy5/Cy3) | Cy3 signal (Input) | Cy5 signal (MeDIP) | Relative methylation (Cy5/Cy3) | Cy3 signal (Input) | Cy5 signal (MeDIP) |
| A_68_P25846165 | chr8:49314031-49314075                            | NM_001145937:445992     | Odz3          | INSIDE                 | 3.322                                                        | 1.784                          | 431.03             | 769.15             | 5.928                          | 367.59             | 2179.09            |
| A_68_P32700072 | chrX:137134843-137134887                          | NM_001077364:197        | Tsc22d3       | INSIDE                 | 3.226                                                        | 3.164                          | 1997.35            | 6319.86            | 10.209                         | 2177.27            | 22226.92           |
| A_68_P29222297 | chr13:92901976-92902020                           | NM_009027:549           | Rasgrt2       | PROMOTER               | 3.225                                                        | 6.389                          | 1014.97            | 6484.30            | 20.601                         | 890.04             | 18335.31           |
| A_68_P28152301 | chr11:115111293-115111337                         | NM_010350:17243         | Grin2c        | INSIDE                 | 3.224                                                        | 1.760                          | 793.83             | 1397.33            | 5.676                          | 698.84             | 3966.33            |
| A_68_P23588918 | chr5:33785513-33785557                            |                         | Unknown       |                        | 3.206                                                        | 1.547                          | 1862.72            | 2882.22            | 4.960                          | 1071.25            | 5313.56            |
| A_68_P32241075 | chrX:7525044-7525088                              | NM_001130416:-51        | Hdac6         | PROMOTER               | 3.194                                                        | 0.509                          | 1639.57            | 833.72             | 1.624                          | 2095.91            | 3403.82            |
| A_68_P27094080 | chr10:41996065-41996109                           | NM_019740:462           | Foxo3         | INSIDE                 | 3.189                                                        | 0.488                          | 1655.90            | 808.58             | 1.557                          | 1214.85            | 1891.52            |
| A_68_P32710891 | chrX:139401598-139401642                          | NM_019496:349           | Ammecr1       | PROMOTER               | 3.177                                                        | 3.070                          | 901.91             | 2768.52            | 9.753                          | 1089.13            | 10622.67           |
| A_68_P32707348 | chrX:138739964-138740008                          | NM_021487:755           | Kcnc1l        | INSIDE                 | 3.176                                                        | 0.708                          | 1822.01            | 1290.10            | 2.249                          | 2308.97            | 5191.85            |
| A_68_P32567810 | chrX:99447558-99447602                            | NM_007709:472           | Cited1        | PROMOTER               | 3.080                                                        | 0.207                          | 1239.88            | 256.43             | 0.637                          | 1780.68            | 1134.14            |
| A_68_P21874507 | chr2:174124666-174124710                          | NM_201617:1329          | Gnas          | INSIDE                 | 3.046                                                        | 0.619                          | 738.53             | 457.38             | 1.886                          | 622.75             | 1174.72            |
| A_68_P32364760 | chrX:45806092-45806136                            | NM_019680:10195         | Elf4          | INSIDE                 | 3.044                                                        | 0.558                          | 559.37             | 312.10             | 1.698                          | 753.01             | 1278.76            |
| A_68_P25394427 | chr7:112936384-112936433                          | NM_001162943:-344       | Dchs1         | PROMOTER               | 3.028                                                        | 1.604                          | 528.58             | 847.78             | 4.857                          | 345.57             | 1678.51            |
| A_68_P32538585 | chrX:91612495-91612539                            | NM_001199337:24         | Apoo          | INSIDE                 | 3.027                                                        | 0.188                          | 1992.20            | 374.32             | 0.569                          | 2559.37            | 1455.83            |
| A_68_P32683271 | chrX:133462182-133462226                          | NM_027067:341           | 1700014N06Rik | INSIDE                 | 3.021                                                        | 2.158                          | 821.50             | 1772.67            | 6.518                          | 1230.09            | 8018.31            |
| A_68_P20348301 | chr1:74438711-74438755                            | NR_029743:-2151         | Mir26b        | PROMOTER               | 2.978                                                        | 2.357                          | 827.27             | 1950.27            | 7.021                          | 706.00             | 4957.01            |
| A_68_P32699217 | chrX:136991521-136991565                          | NM_021463:401           | Prps1         | INSIDE                 | 2.973                                                        | 0.211                          | 1266.95            | 267.82             | 0.629                          | 1920.29            | 1206.99            |
| A_68_P32698228 | chrX:136812874-136812918                          | ENSMUST00000130153:-495 |               | PROMOTER               | 2.967                                                        | 0.213                          | 2882.36            | 614.51             | 0.633                          | 3594.99            | 2274.27            |
| A_68_P32375460 | chrX:48558753-48558797                            | NM_134163:235           | Mbnl3         | INSIDE                 | 2.964                                                        | 0.214                          | 1536.57            | 329.20             | 0.635                          | 2032.11            | 1290.50            |
| A_68_P32322124 | chrX:34731543-34731587                            | NM_153503:227           | Rnfl13a1      | INSIDE                 | 2.962                                                        | 0.512                          | 1233.97            | 632.16             | 1.518                          | 1646.58            | 2498.92            |
| A_68_P32465786 | chrX:71211813-71211857                            | NM_008224:-180          | Hcfc1         | PROMOTER               | 2.939                                                        | 0.230                          | 1366.39            | 314.92             | 0.677                          | 1731.22            | 1172.57            |
| A_68_P23588919 | chr5:33785607-33785651                            |                         | Unknown       |                        | 2.925                                                        | 0.191                          | 2204.79            | 420.13             | 0.557                          | 1614.85            | 899.93             |
| A_68_P32577124 | chrX:101609142-101609186                          | NM_009592:21            | Abcb7         | INSIDE                 | 2.883                                                        | 0.193                          | 1097.20            | 212.25             | 0.558                          | 1604.97            | 895.04             |
| A_68_P22209749 | chr3:67178298-67178342                            | NM_001039543:302        | Mifl          | INSIDE                 | 2.876                                                        | 1.779                          | 1046.06            | 1860.89            | 5.117                          | 666.83             | 3412.09            |
| A_68_P27233861 | chr10:70622146-70622190                           | NM_031397:214           | Bicc1         | INSIDE                 | 2.843                                                        | 0.620                          | 1556.32            | 965.12             | 1.763                          | 1183.74            | 2087.16            |
| A_68_P32564062 | chrX:98625083-98625127                            | NM_023144:115           | Nono          | INSIDE                 | 2.829                                                        | 0.587                          | 1493.95            | 876.95             | 1.661                          | 1905.39            | 3164.27            |
| A_68_P24983894 | chr7:17492409-17492453                            | NM_008967:592           | Ptgr1         | INSIDE                 | 2.814                                                        | 0.651                          | 708.64             | 461.56             | 1.833                          | 558.46             | 1023.67            |
| A_68_P30981935 | chr16:94748214-94748258                           | NM_007834:0             | Dser3         | INSIDE                 | 2.783                                                        | 0.671                          | 1402.73            | 940.97             | 1.867                          | 1033.99            | 1930.43            |
| A_68_P32746464 | chrX:148238102-148238146                          | NM_021523:300           | Huwc1         | INSIDE                 | 2.779                                                        | 0.180                          | 2429.92            | 438.56             | 0.502                          | 3154.13            | 1582.19            |
| A_68_P30964219 | chr16:91660394-91660440                           | NM_019973:12348         | Son           | INSIDE                 | 2.750                                                        | 1.459                          | 914.91             | 1334.67            | 4.011                          | 646.45             | 2593.12            |
| A_68_P31120666 | chr17:28279127-28279172                           | NM_001004366:-321       | Scubc3        | PROMOTER               | 2.745                                                        | 0.571                          | 4769.03            | 2723.59            | 1.568                          | 2991.69            | 4690.23            |
| A_68_P30462697 | chr15:96118805-96118849                           | NM_175251:874           | Arid2         | INSIDE                 | 2.730                                                        | 0.661                          | 898.10             | 593.90             | 1.805                          | 600.20             | 1083.54            |
| A_68_P28071137 | chr11:100820628-100820677                         | NM_008986:11279         | Ptfr          | INSIDE                 | 2.707                                                        | 2.201                          | 210.73             | 463.80             | 5.958                          | 211.95             | 1262.72            |
| A_68_P29428730 | chr14:17197854-17197898                           | NM_009409:157           | Top2b         | INSIDE                 | 2.689                                                        | 0.183                          | 2298.70            | 420.51             | 0.492                          | 1847.83            | 908.83             |
| A_68_P27212434 | chr10:66999516-66999563                           | NM_010118:-1077         | Egr2          | PROMOTER               | 2.674                                                        | 0.241                          | 3139.30            | 755.22             | 0.643                          | 2120.74            | 1364.36            |
| A_68_P31936308 | chr19:6906036-6906086                             | NM_019924:9031          | Rps6ka4       | INSIDE                 | 2.654                                                        | 1.459                          | 1216.81            | 1775.48            | 3.873                          | 779.02             | 3017.13            |
| A_68_P32239400 | chrX:7215668-7215712                              | NM_009305:-15           | Syp           | PROMOTER               | 2.608                                                        | 0.180                          | 5125.89            | 922.11             | 0.469                          | 5731.52            | 2688.86            |
| A_68_P29629465 | chr14:58318680-58318724                           | NM_015771:46258         | Lats2         | INSIDE                 | 2.607                                                        | 1.658                          | 689.44             | 1142.92            | 4.322                          | 532.08             | 2299.53            |
| A_68_P28442990 | chr12:54808173-54808232                           | NM_013780:458539        | Npas3         | INSIDE                 | 2.604                                                        | 2.556                          | 1021.39            | 2610.68            | 6.655                          | 682.44             | 4541.62            |
| A_68_P25599898 | chr7:150481545-150481589                          | NR_001461:886           | Kenq1ot1      | INSIDE                 | 2.601                                                        | 0.682                          | 986.10             | 672.52             | 1.774                          | 700.25             | 1242.20            |
| A_68_P20884270 | chr1:183853884-183853931                          | NM_001083120:96204      | Enah          | INSIDE                 | 2.593                                                        | 3.063                          | 166.71             | 510.59             | 7.942                          | 178.16             | 1414.96            |
| A_68_P24658378 | chr6:94649175-94649219                            | NM_008377:943           | Lrig1         | INSIDE                 | 2.581                                                        | 0.229                          | 2084.00            | 477.63             | 0.592                          | 1595.82            | 943.95             |
| A_68_P30542118 | chr16:10412308-10412352                           | NM_011955:300           | Nubp1         | INSIDE                 | 2.576                                                        | 0.734                          | 3573.45            | 2623.49            | 1.891                          | 2645.25            | 5003.00            |
| A_68_P26224550 | chr8:123632450-123632508                          | NM_001166482:-199       | Mthl5d        | DIVERGENT_PROMOTER     | 2.575                                                        | 8.435                          | 7313.59            | 61693.66           | 21.723                         | 5216.59            | 113321.80          |
| A_68_P20250385 | chr1:57027773-57027817                            | NM_139146:384           | Satb2         | INSIDE                 | 2.570                                                        | 0.246                          | 2235.81            | 549.83             | 0.632                          | 1644.99            | 1039.49            |
| A_68_P26504313 | chr9:50369450-50369494                            | NM_025687:-99           | Tex12         | DIVERGENT_PROMOTER     | 2.564                                                        | 1.670                          | 595.94             | 995.40             | 4.283                          | 497.92             | 2132.59            |
| A_68_P23396589 | chr4:148180346-148180401                          | NM_027195:1873          | Cas2l         | INSIDE                 | 2.563                                                        | 2.263                          | 157.20             | 355.69             | 5.798                          | 158.00             | 916.16             |
| A_68_P27944883 | chr11:78510477-78510521                           | NM_008702:429           | Nlk           | INSIDE                 | 2.545                                                        | 0.696                          | 2646.93            | 1841.40            | 1.770                          | 1946.36            | 3445.82            |
| A_68_P27649722 | chr11:24064060-24064104                           | NM_001159290:83388      | Bcl11a        | INSIDE                 | 2.538                                                        | 2.525                          | 192.38             | 485.74             | 6.409                          | 134.34             | 861.06             |
| A_68_P25092565 | chr7:52602361-52602407                            | NM_029741:20005         | Ppfla3        | INSIDE                 | 2.535                                                        | 11.831                         | 2987.65            | 35347.23           | 29.987                         | 1937.28            | 58093.45           |
| A_68_P23594804 | chr5:34868325-34868369                            | NM_011893:86            | Sh3bp2        | PROMOTER               | 2.525                                                        | 2.153                          | 1339.96            | 2885.60            | 5.438                          | 1184.98            | 6443.67            |
| A_68_P22129414 | chr3:51200267-51200311                            | NM_026358:181           | 4930583H14Rik | INSIDE                 | 2.500                                                        | 5.279                          | 1233.49            | 6511.29            | 13.198                         | 872.47             | 11514.77           |
| A_68_P28724521 | chr12:109154706-109154750                         | NM_001079883:86896      | Bcl11b        | INSIDE                 | 2.493                                                        | 2.102                          | 445.62             | 936.66             | 5.240                          | 395.98             | 2074.80            |
| A_68_P28123544 | chr11:11019886-110198910                          | NM_147219:142           | Abca5         | INSIDE                 | 2.491                                                        | 3.885                          | 461.84             | 1794.05            | 9.675                          | 441.97             | 4276.21            |
| A_68_P30012296 | chr15:10644051-10644095                           | NM_030690:777           | Rai14         | PROMOTER               | 2.486                                                        | 0.080                          | 6721.26            | 535.19             | 0.198                          | 4187.07            | 828.76             |
| A_68_P31253724 | chr17:56218702-56218746                           | NM_008233:-355          | Hdgfrp2       | DIVERGENT_PROMOTER     | 2.469                                                        | 0.141                          | 7388.62            | 1040.37            | 0.348                          | 4630.24            | 1609.56            |
| A_68_P25406573 | chr7:116318129-116318173                          | NM_057173:-4328         | Lmo1          | PROMOTER               | 2.469                                                        | 0.252                          | 1759.47            | 444.02             | 0.623                          | 1325.32            | 825.90             |
| A_68_P32672782 | chrX:131135885-131135929                          | NM_019868:82            | Hnrnp2        | INSIDE                 | 2.464                                                        | 0.562                          | 2657.04            | 1493.76            | 1.385                          | 3488.49            | 4832.40            |
| A_68_P24631552 | chr6:90259348-90259392                            | NM_027928:15809         | Chst3         | INSIDE                 | 2.462                                                        | 1.710                          | 452.86             | 774.52             | 4.211                          | 374.31             | 1576.36            |
| A_68_P32148154 | chr19:47254136-47254180                           | NM_021360:849           | Neur1a        | INSIDE                 | 2.454                                                        | 3.531                          | 10959.86           | 38703.66           | 8.665                          | 7399.64            | 64118.75           |
| A_68_P21565607 | chr2:118528199-118528243                          | NM_001081971:1479       | Gml337        | INSIDE                 | 2.449                                                        | 0.255                          | 2260.52            | 577.06             | 0.625                          | 1654.55            | 1034.37            |
| A_68_P32790792 | chrX:159198218-159198262                          | NM_009031:-63           | Rbbp7         | PROMOTER               | 2.446                                                        | 0.590                          | 2086.11            | 1231.58            | 1.444                          | 2947.80            | 4256.55            |
| A_68_P20637452 | chr1:137001893-137001941                          | NM_001033409:-63        | Lgr6          | PROMOTER               | 2.422                                                        | 4.446                          | 4998.07            | 22220.63           | 10.766                         | 3343.21            | 35991.99           |
| A_68_P30423622 | chr15:88998029-88998073                           | NM_001159521:6230       | Ptxnb2        | INSIDE                 | 2.411                                                        | 1.607                          | 643.21             | 1033.76            | 3.875                          | 470.78             | 1824.37            |
| A_68_P29469017 | chr14:24824321-24824365                           | NM_010610:-915          | Kcnma1        | PROMOTER               | 2.399                                                        | 2.574                          | 193.74             | 498.61             | 6.174                          | 149.01             | 919.99             |

| ProbeName      | Target position of probe on CpG island microarray | TargetID                | GeneSymbol    | CpG island Description | Ratio of relative methylation (TiO <sub>2</sub> -NP/Vehicle) | Sham group                     |                    |                    | TiO <sub>2</sub> -H group      |                    |                    |
|----------------|---------------------------------------------------|-------------------------|---------------|------------------------|--------------------------------------------------------------|--------------------------------|--------------------|--------------------|--------------------------------|--------------------|--------------------|
|                |                                                   |                         |               |                        |                                                              | Relative methylation (Cy5/Cy3) | Cy3 signal (Input) | Cy5 signal (MeDIP) | Relative methylation (Cy5/Cy3) | Cy3 signal (Input) | Cy5 signal (MeDIP) |
| A_68_P32691811 | chrX:135448869-135448913                          | NM_013724:-78           | Nrk           | PROMOTER               | 2.396                                                        | 0.569                          | 7328.70            | 4171.94            | 1.364                          | 9260.75            | 12630.82           |
| A_68_P22898182 | chr4:48060289-48060333                            | NM_015743:-3809         | Nr4a3         | PROMOTER               | 2.393                                                        | 1.659                          | 756.90             | 1255.55            | 3.969                          | 625.18             | 2481.39            |
| A_68_P24973912 | chr7:13556599-13556643                            | NM_178732:5408          | Zfp324        | INSIDE                 | 2.378                                                        | 1.721                          | 736.15             | 1267.14            | 4.093                          | 587.18             | 2403.51            |
| A_68_P23896973 | chr5:93371964-93372008                            | NM_001077596:44963      | Shroom3       | INSIDE                 | 2.365                                                        | 2.100                          | 408.11             | 856.83             | 4.966                          | 332.56             | 1651.58            |
| A_68_P32748065 | chrX:148579255-148579299                          | NM_001114664:466        | Iqsec2        | INSIDE                 | 2.361                                                        | 0.659                          | 796.04             | 524.81             | 1.557                          | 945.39             | 1471.80            |
| A_68_P24596644 | chr6:83958657-83958701                            | NM_001077694:95         | Dysf          | INSIDE                 | 2.356                                                        | 2.367                          | 269.48             | 637.86             | 5.577                          | 182.83             | 1019.63            |
| A_68_P27564657 | chr11:5617071-5617115                             | NM_178623:24087         | Urgcp         | INSIDE                 | 2.355                                                        | 2.436                          | 705.57             | 1718.85            | 5.737                          | 499.08             | 2863.32            |
| A_68_P25094601 | chr7:52962152-52962196                            | NM_016974:1558          | Dbp           | INSIDE                 | 2.345                                                        | 0.208                          | 2271.06            | 472.85             | 0.488                          | 1663.32            | 812.26             |
| A_68_P32791140 | chrX:159267555-159267599                          | NM_178935:-245          | Txlng         | PROMOTER               | 2.343                                                        | 0.241                          | 1253.80            | 302.40             | 0.565                          | 1704.19            | 963.03             |
| A_68_P21569149 | chr2:119163546-119163590                          | NM_019454:12049         | Dll4          | DOWNSTREAM             | 2.340                                                        | 2.253                          | 1574.09            | 3547.00            | 5.274                          | 1325.48            | 6990.45            |
| A_68_P30366726 | chr15:79315953-79315997                           | NM_008427:19697         | Kcnj4         | INSIDE                 | 2.331                                                        | 2.447                          | 581.72             | 1423.23            | 5.702                          | 398.66             | 2273.14            |
| A_68_P31175232 | chr17:39983513-39983557                           | ENSMUST00000157647:-536 |               | PROMOTER               | 2.327                                                        | 0.749                          | 4175.81            | 3126.30            | 1.742                          | 3082.65            | 5369.94            |
| A_68_P32364050 | chrX:45697107-45697151                            | NM_178782:2594          | Bcorl1        | INSIDE                 | 2.310                                                        | 1.888                          | 8344.09            | 15754.93           | 4.361                          | 8516.29            | 37139.67           |
| A_68_P32135814 | chr19:45080366-45080410                           | NM_053164:544           | Mrip43        | INSIDE                 | 2.299                                                        | 0.250                          | 1799.59            | 449.76             | 0.575                          | 1291.80            | 742.32             |
| A_68_P31149892 | chr17:33786930-33786974                           | NM_001109913:35451      | Hmnpn         | INSIDE                 | 2.297                                                        | 1.398                          | 963.35             | 1346.75            | 3.211                          | 802.72             | 2577.27            |
| A_68_P25581954 | chr7:147234659-147234703                          | NM_010836:307           | Msx3          | INSIDE                 | 2.295                                                        | 0.216                          | 2207.42            | 477.63             | 0.497                          | 1627.52            | 808.22             |
| A_68_P24026284 | chr5:118830994-118831046                          |                         |               | Unknown                | 2.295                                                        | 3.521                          | 3038.53            | 10697.23           | 8.080                          | 1888.70            | 15261.42           |
| A_68_P31093844 | chr17:23956989-23957033                           | NM_175229:16857         | Srrm2         | INSIDE                 | 2.292                                                        | 1.378                          | 1318.88            | 1817.02            | 3.157                          | 811.12             | 2560.97            |
| A_68_P27180703 | chr10:60938705-60938749                           | NM_153542:146           | Lrrc20        | INSIDE                 | 2.288                                                        | 9.024                          | 1247.99            | 11261.26           | 20.643                         | 1159.24            | 23929.67           |
| A_68_P26885589 | chr9:121698137-121698187                          | NR_027967:2076          | Hhatl         | INSIDE                 | 2.288                                                        | 1.626                          | 500.78             | 814.04             | 3.719                          | 414.01             | 1539.80            |
| A_68_P32560535 | chrX:97821487-97821531                            | NM_008446:105           | Kif4          | INSIDE                 | 2.286                                                        | 0.260                          | 1904.88            | 495.30             | 0.594                          | 2503.48            | 1487.94            |
| A_68_P29616405 | chr14:55733423-55733480                           | NM_177049:2321          | Jph4          | INSIDE                 | 2.280                                                        | 2.002                          | 1122.21            | 2246.68            | 4.564                          | 773.50             | 3529.98            |
| A_68_P21069122 | chr2:24830308-24830352                            | NM_001031808:288        | Mrpl41        | INSIDE                 | 2.280                                                        | 0.723                          | 2687.27            | 1941.63            | 1.648                          | 2071.68            | 3413.36            |
| A_68_P30346601 | chr15:76010142-76010186                           | NM_201394:15976         | Plec          | INSIDE                 | 2.270                                                        | 1.702                          | 549.07             | 934.42             | 3.864                          | 398.89             | 1541.12            |
| A_68_P27340040 | chr10:90564963-90565014                           | NM_027078:19205         | Ikbip         | INSIDE                 | 2.268                                                        | 2.131                          | 412.10             | 878.02             | 4.833                          | 314.48             | 1519.95            |
| A_68_P32427553 | chrX:61530261-61530305                            | NM_178740:-111          | Slitrk4       | PROMOTER               | 2.267                                                        | 0.619                          | 3195.79            | 1978.14            | 1.403                          | 4275.36            | 5998.39            |
| A_68_P32791135 | chrX:159266933-159266977                          | NM_178935:377           | Txlng         | INSIDE                 | 2.261                                                        | 0.628                          | 2796.29            | 1755.34            | 1.420                          | 3526.59            | 5006.40            |
| A_68_P27835628 | chr11:59041341-59041385                           | NM_001130408:302        | Arf1          | INSIDE                 | 2.261                                                        | 2.342                          | 666.77             | 1561.72            | 5.295                          | 505.35             | 2675.83            |
| A_68_P32470782 | chrX:72376286-72376330                            | NM_008621:-20           | Mpp1          | PROMOTER               | 2.259                                                        | 0.195                          | 2064.33            | 401.99             | 0.440                          | 2710.33            | 1192.38            |
| A_68_P23308583 | chr4:131392567-131392611                          | NM_001083119:1605       | Pipru         | INSIDE                 | 2.257                                                        | 0.269                          | 2368.25            | 636.01             | 0.606                          | 1582.03            | 958.96             |
| A_68_P22336407 | chr3:93249382-93249426                            | NM_001163098:3153       | Tchh          | INSIDE                 | 2.254                                                        | 0.162                          | 2806.80            | 453.59             | 0.364                          | 2119.88            | 772.12             |
| A_68_P31862858 | chr18:80389262-80389306                           | NM_199197:8074          | Rbfa          | INSIDE                 | 2.232                                                        | 1.732                          | 287.56             | 498.14             | 3.866                          | 239.31             | 925.26             |
| A_68_P23523160 | chr5:20388333-20388392                            | NM_177601:92            | Tmem60        | INSIDE                 | 2.231                                                        | 1.509                          | 541.80             | 817.53             | 3.366                          | 338.81             | 1140.40            |
| A_68_P30356632 | chr15:77759535-77759579                           | NM_019913:-132          | Txn2          | PROMOTER               | 2.219                                                        | 0.114                          | 4801.38            | 548.13             | 0.253                          | 3063.19            | 776.05             |
| A_68_P32710890 | chrX:139401516-139401560                          | NM_019496:-267          | Ammecr1       | PROMOTER               | 2.217                                                        | 2.823                          | 286.77             | 809.65             | 6.259                          | 396.02             | 2478.75            |
| A_68_P25614334 | chr8:3515198-3515255                              | NM_053177:14708         | Mcoln1        | INSIDE                 | 2.210                                                        | 0.207                          | 2436.92            | 505.26             | 0.458                          | 1788.27            | 819.41             |
| A_68_P24428352 | chr6:48570342-48570386                            | NM_173429:7186          | Zfp775        | INSIDE                 | 2.204                                                        | 1.796                          | 319.13             | 573.30             | 3.959                          | 296.38             | 1173.33            |
| A_68_P32252886 | chrX:10294260-10294304                            | NM_001166635:-208       | Mid1p1        | PROMOTER               | 2.203                                                        | 0.318                          | 1574.06            | 501.13             | 0.701                          | 2058.97            | 1444.01            |
| A_68_P22309972 | chr3:87587929-87587973                            | NM_001033124:11134      | Ntrk1         | INSIDE                 | 2.199                                                        | 1.569                          | 2044.81            | 3208.63            | 3.451                          | 1530.24            | 5280.39            |
| A_68_P25422971 | chr7:119301817-119301861                          | NM_015814:733           | Dkk3          | INSIDE                 | 2.190                                                        | 3.136                          | 3496.34            | 10964.25           | 6.869                          | 2815.34            | 19338.78           |
| A_68_P24117611 | chr5:136209975-136210019                          | NM_008898:44913         | Por           | INSIDE                 | 2.184                                                        | 1.547                          | 890.21             | 1376.88            | 3.378                          | 673.17             | 2273.97            |
| A_68_P20553865 | chr1:120734246-120734290                          | NM_001081125:215928     | Glil2         | INSIDE                 | 2.177                                                        | 1.864                          | 939.88             | 1751.56            | 4.057                          | 806.68             | 3272.86            |
| A_68_P32378022 | chrX:49033742-49033786                            | NM_015819:-110          | Hs6st2        | PROMOTER               | 2.175                                                        | 0.640                          | 2173.56            | 1390.68            | 1.392                          | 2795.09            | 3889.74            |
| A_68_P21420371 | chr2:90894443-90894487                            | NM_008948:292           | Psmc3         | INSIDE                 | 2.173                                                        | 1.785                          | 2443.15            | 4360.47            | 3.878                          | 1878.91            | 7286.54            |
| A_68_P31121831 | chr17:28465275-28465320                           | NM_011287:-118          | Rpl10a        | PROMOTER               | 2.165                                                        | 7.985                          | 692.24             | 5527.91            | 17.290                         | 589.46             | 10192.03           |
| A_68_P26397640 | chr9:30729401-30729445                            | NM_001024139:615        | Adamts15      | INSIDE                 | 2.160                                                        | 1.424                          | 1059.29            | 1508.30            | 3.075                          | 891.62             | 2741.86            |
| A_68_P27473560 | chr10:115551150-115551194                         | NM_001161855:-199       | 4933416C03Rik | PROMOTER               | 2.153                                                        | 1.966                          | 708.88             | 1393.92            | 4.233                          | 540.85             | 2289.42            |
| A_68_P31227869 | chr17:50432800-50432844                           | NM_010021:102           | Dazl          | INSIDE                 | 2.150                                                        | 1.933                          | 738.63             | 1427.62            | 4.155                          | 602.36             | 2502.83            |
| A_68_P24428221 | chr6:48547445-48547489                            | NM_001079901:3585       | Repin1        | INSIDE                 | 2.148                                                        | 1.780                          | 691.69             | 1231.51            | 3.824                          | 554.78             | 2121.41            |
| A_68_P25004860 | chr7:25217492-25217536                            | NM_199013:13187         | Irgc1         | INSIDE                 | 2.142                                                        | 1.731                          | 440.08             | 761.58             | 3.707                          | 320.09             | 1186.70            |
| A_68_P33015620 | chr1_random:50449-50497                           | NM_026866:134866        | Disp1         | INSIDE                 | 2.133                                                        | 1.701                          | 352.30             | 599.12             | 3.628                          | 263.73             | 956.84             |
| A_68_P24763306 | chr6:113991628-113991672                          | NM_009723:424           | Atp2b2        | INSIDE                 | 2.132                                                        | 0.074                          | 8276.90            | 609.06             | 0.157                          | 4814.09            | 755.17             |
| A_68_P27316752 | chr10:86371693-86371737                           | NM_138673:98973         | Stab2         | INSIDE                 | 2.122                                                        | 2.927                          | 9338.35            | 27331.90           | 6.211                          | 6520.23            | 40497.84           |
| A_68_P30346557 | chr15:76004653-76004697                           | NM_201394:21466         | Plec          | INSIDE                 | 2.121                                                        | 1.500                          | 534.42             | 801.39             | 3.180                          | 465.60             | 1480.79            |
| A_68_P25301151 | chr7:95278746-95278790                            | NM_001081414:546091     | Grm5          | INSIDE                 | 2.120                                                        | 1.363                          | 1351.23            | 1841.59            | 2.890                          | 1033.99            | 2987.83            |
| A_68_P22630575 | chr3:148652818-148652862                          | ENSMUST00000098518:-560 |               | PROMOTER               | 2.101                                                        | 6.740                          | 913.99             | 6160.19            | 14.161                         | 763.84             | 10816.45           |
| A_68_P30382917 | chr15:82176766-82176812                           | NM_026914:313           | 1500032L24Rik | INSIDE                 | 2.098                                                        | 2.644                          | 631.38             | 1669.31            | 5.547                          | 551.68             | 3060.30            |
| A_68_P28077443 | chr11:101949878-101949922                         | NM_016695:-71           | Mpp2          | PROMOTER               | 2.098                                                        | 0.193                          | 3210.39            | 619.78             | 0.405                          | 2128.88            | 862.08             |
| A_68_P31654584 | chr18:42435490-42435534                           | NM_172626:506           | Rbm27         | INSIDE                 | 2.095                                                        | 0.187                          | 3474.90            | 651.48             | 0.393                          | 2384.05            | 936.27             |
| A_68_P32363267 | chr4:140864773-140864817                          | NM_010139:7640          | Epha2         | INSIDE                 | 2.088                                                        | 1.537                          | 1059.68            | 1629.05            | 3.210                          | 785.18             | 2520.79            |
| A_68_P22393168 | chr3:104591684-104591728                          | NM_007484:-245          | Rhoc          | PROMOTER               | 2.088                                                        | 1.741                          | 3023.33            | 5263.26            | 3.635                          | 2294.56            | 8340.07            |
| A_68_P33015621 | chr1_random:50610-50662                           | NM_026866:134702        | Disp1         | INSIDE                 | 2.087                                                        | 1.420                          | 808.65             | 1148.55            | 2.964                          | 567.90             | 1683.36            |
| A_68_P27284174 | chr10:80049350-80049394                           | NM_145421:3714          | Fam108a       | INSIDE                 | 2.079                                                        | 1.607                          | 515.22             | 827.96             | 3.340                          | 442.41             | 1477.84            |
| A_68_P30348874 | chr15:76350196-76350240                           | NM_130893:2341          | Sert1         | INSIDE                 | 2.076                                                        | 0.131                          | 10867.94           | 1424.35            | 0.272                          | 6340.97            | 1725.64            |
| A_68_P21594127 | chr2:123916191-123916235                          | ENSMUST00000137172:508  |               | INSIDE                 | 2.076                                                        | 0.205                          | 6166.41            | 1264.61            | 0.426                          | 4195.88            | 1786.08            |

| ProbeName      | Target position of probe on CpG island microarray | TargetID                | GeneSymbol    | CpG island Description | Ratio of relative methylation (TiO <sub>2</sub> -NP/Vehicle) | Sham group                     |                    |                    | TiO <sub>2</sub> -H group      |                    |                    |
|----------------|---------------------------------------------------|-------------------------|---------------|------------------------|--------------------------------------------------------------|--------------------------------|--------------------|--------------------|--------------------------------|--------------------|--------------------|
|                |                                                   |                         |               |                        |                                                              | Relative methylation (Cy5/Cy3) | Cy3 signal (Input) | Cy5 signal (MeDIP) | Relative methylation (Cy5/Cy3) | Cy3 signal (Input) | Cy5 signal (MeDIP) |
| A_68_P29043020 | chr13:53381133-53381177                           | NM_013846:324           | Ror2          | INSIDE                 | 2.073                                                        | 0.233                          | 1983.66            | 461.48             | 0.482                          | 1614.55            | 778.74             |
| A_68_P32778406 | chrX:156575977-156576021                          | NM_008810:270           | Pdha1         | INSIDE                 | 2.072                                                        | 0.276                          | 3065.39            | 846.09             | 0.572                          | 4295.24            | 2456.84            |
| A_68_P26504859 | chr9:50467279-50467323                            | NM_145614:585           | Dlat          | INSIDE                 | 2.072                                                        | 0.210                          | 2240.02            | 470.46             | 0.435                          | 1713.12            | 745.43             |
| A_68_P24397783 | chr6:42299752-42299796                            | NM_011777:-52           | Zyx           | PROMOTER               | 2.065                                                        | 0.117                          | 4896.28            | 575.25             | 0.243                          | 3371.39            | 817.83             |
| A_68_P28450915 | chr12:56256240-56256284                           | NM_011899:-64           | Srp54a        | PROMOTER               | 2.060                                                        | 0.293                          | 1566.37            | 459.68             | 0.604                          | 1133.80            | 685.33             |
| A_68_P28107298 | chr11:107341035-107341079                         | NM_025894:215           | Psmc12        | INSIDE                 | 2.060                                                        | 0.238                          | 1905.14            | 454.14             | 0.491                          | 1652.60            | 811.49             |
| A_68_P23364203 | chr4:141020484-141020528                          | NM_009541:19919         | Zbtb17        | INSIDE                 | 2.058                                                        | 1.590                          | 789.70             | 1255.95            | 3.272                          | 619.89             | 2028.53            |
| A_68_P24954799 | chr7:6238258-6238302                              | NM_001024928-99         | Zfp667        | INSIDE                 | 2.041                                                        | 0.248                          | 3830.73            | 948.82             | 0.506                          | 2759.75            | 1395.27            |
| A_68_P28039261 | chr11:95376208-95376252                           | NM_130858:-351          | Nxph3         | PROMOTER               | 2.040                                                        | 0.324                          | 2834.73            | 917.67             | 0.660                          | 1960.35            | 1294.53            |
| A_68_P20797862 | chr11:167933482-167933526                         | NM_011137:-739          | Pou2f1        | PROMOTER               | 2.040                                                        | 0.179                          | 2526.00            | 452.13             | 0.365                          | 1730.81            | 631.83             |
| A_68_P28713546 | chr12:107412574-107412618                         | BC156654:374736         |               | DOWNSTREAM             | 2.038                                                        | 0.259                          | 2052.74            | 532.01             | 0.528                          | 1538.56            | 812.54             |
| A_68_P32070028 | chr19:32463753-32463797                           | NR_033198:69            | 2700046G09Rik | INSIDE                 | 2.032                                                        | 0.300                          | 1668.43            | 500.16             | 0.609                          | 1234.31            | 751.89             |
| A_68_P32240782 | chrX:7476676-7476720                              | NM_011591:175           | Timm17b       | INSIDE                 | 2.030                                                        | 0.309                          | 1357.54            | 419.03             | 0.626                          | 1773.99            | 1111.37            |
| A_68_P30371309 | chr15:80118848-80118907                           | NM_001044308:1210       | Cacna1i       | INSIDE                 | 2.024                                                        | 2.193                          | 492.37             | 1079.74            | 4.440                          | 239.54             | 1063.46            |
| A_68_P21102113 | chr2:30112262-30112306                            | NM_177725:18996         | Lrcc8a        | INSIDE                 | 2.022                                                        | 1.769                          | 407.46             | 720.73             | 3.576                          | 320.25             | 1145.16            |
| A_68_P30083235 | chr15:25711092-25711136                           | NM_019472:158810        | Myo10         | INSIDE                 | 2.020                                                        | 1.501                          | 740.92             | 1112.48            | 3.033                          | 587.23             | 1780.88            |
| A_68_P25505248 | chr7:134486671-134486730                          | NM_146202:2128          | Zip768        | INSIDE                 | 2.019                                                        | 2.895                          | 246.64             | 713.95             | 5.843                          | 173.77             | 1015.44            |
| A_68_P31442544 | chr17:91487486-91487530                           | NM_020252:4634          | Nrxn1         | INSIDE                 | 2.018                                                        | 2.302                          | 485.64             | 1117.90            | 4.646                          | 424.97             | 1974.58            |
| A_68_P22405767 | chr3:107145905-107145949                          | NM_001045807:-9719      | Rbm15         | PROMOTER               | 2.015                                                        | 1.595                          | 464.07             | 740.00             | 3.213                          | 316.43             | 1016.53            |
| A_68_P21866928 | chr2:172805309-172805353                          | NM_001083959:-12        | Xpo11         | PROMOTER               | 2.015                                                        | 1.547                          | 582.53             | 901.17             | 3.117                          | 494.94             | 1542.80            |
| A_68_P24428351 | chr6:48570207-48570251                            | NM_173429:7050          | Zip775        | INSIDE                 | 2.012                                                        | 1.780                          | 864.07             | 1538.00            | 3.581                          | 728.59             | 2609.17            |
| A_68_P25343508 | chr7:103358546-103358591                          | NM_011858:-578          | Odz4          | PROMOTER               | 2.010                                                        | 1.498                          | 4344.14            | 6507.77            | 3.011                          | 3344.48            | 10070.19           |
| A_68_P25032744 | chr7:31435111-31435155                            | NM_133693:115           | Rbm42         | INSIDE                 | 2.009                                                        | 3.085                          | 839.39             | 2589.48            | 6.197                          | 704.41             | 4365.24            |
| A_68_P28246310 | chr12:12948750-12948795                           | NM_008709:-130          | Mycn          | PROMOTER               | 2.008                                                        | 3.679                          | 260.59             | 958.63             | 7.387                          | 267.60             | 1976.74            |
| A_68_P29703312 | chr14:71166447-71166491                           | NM_023045:-33           | Xpo7          | DIVERGENT_PROMOTER     | 2.005                                                        | 2.141                          | 476.78             | 1020.60            | 4.291                          | 423.92             | 1819.16            |
| A_68_P32234209 | chrX:5977910-5977954                              | NM_001040459:670        | Shroom4       | INSIDE                 | 2.004                                                        | 0.343                          | 2044.80            | 701.11             | 0.687                          | 2663.69            | 1830.68            |
| A_68_P30083232 | chr15:25710801-25710845                           | NM_019472:158518        | Myo10         | INSIDE                 | 2.003                                                        | 2.319                          | 305.15             | 707.70             | 4.645                          | 231.43             | 1075.06            |
| A_68_P25539016 | chr7:140315036-140315089                          | NM_009980:104           | Ctbp2         | INSIDE                 | 2.003                                                        | 2.608                          | 6932.15            | 18081.65           | 5.225                          | 4442.76            | 23212.76           |
| A_68_P32342965 | chr4:137513918-137513962                          | NM_199307:95789         | Ece1          | INSIDE                 | 2.003                                                        | 2.220                          | 214.85             | 477.07             | 4.447                          | 141.05             | 627.21             |
| A_68_P25499766 | chr7:133435827-133435871                          | NM_145587:19716         | Sbk1          | INSIDE                 | 1.999                                                        | 2.022                          | 559.32             | 1130.85            | 4.042                          | 450.99             | 1822.70            |
| A_68_P27693351 | chr11:33102254-33102303                           | NM_019916:1310          | Tlx3          | INSIDE                 | 1.997                                                        | 1.851                          | 1352.30            | 2502.54            | 3.696                          | 734.82             | 2716.23            |
| A_68_P25031175 | chr7:31140774-31140818                            | NM_175478:6995          | Lrfr3         | INSIDE                 | 1.994                                                        | 1.603                          | 781.27             | 1252.73            | 3.197                          | 605.49             | 1935.65            |
| A_68_P32441101 | chrX:65932010-65932054                            | NM_008031:303           | Fmr1          | INSIDE                 | 1.992                                                        | 0.297                          | 1599.72            | 474.71             | 0.591                          | 2304.18            | 1362.31            |
| A_68_P25954894 | chr8:73437692-73437736                            | NM_173013:7842          | Mtap1s        | INSIDE                 | 1.991                                                        | 2.071                          | 445.74             | 923.08             | 4.122                          | 366.91             | 1512.58            |
| A_68_P25587733 | chr7:148445537-148445581                          | NM_001081118:30872      | Phr1          | INSIDE                 | 1.986                                                        | 2.754                          | 845.36             | 2328.09            | 5.468                          | 611.19             | 3342.18            |
| A_68_P31157716 | chr17:35258201-35258245                           | NM_009975:170           | Csnk2b        | INSIDE                 | 1.985                                                        | 0.153                          | 3762.87            | 576.81             | 0.304                          | 2574.40            | 783.50             |
| A_68_P31926196 | chr19:4989991-4990035                             | NM_153553:-41           | Npas4         | PROMOTER               | 1.980                                                        | 2.362                          | 406.11             | 959.10             | 4.676                          | 263.63             | 1232.82            |
| A_68_P27787411 | chr11:50039460-50039504                           | NM_145926:646           | Mgat4b        | INSIDE                 | 1.980                                                        | 4.502                          | 382.43             | 1721.71            | 8.913                          | 278.84             | 2485.20            |
| A_68_P32408595 | chrX:56387162-56387206                            | NM_010200:429           | Fglf3         | INSIDE                 | 1.979                                                        | 0.311                          | 1261.91            | 392.17             | 0.615                          | 1698.91            | 1044.83            |
| A_68_P32240899 | chrX:7499781-7499825                              | NM_013892:2855          | Peskn1        | INSIDE                 | 1.976                                                        | 0.332                          | 2036.08            | 676.01             | 0.656                          | 2725.85            | 1788.51            |
| A_68_P29090576 | chr13:63066071-63066115                           | ENSMUST00000170896:-160 |               | PROMOTER               | 1.973                                                        | 3.275                          | 947.47             | 3103.12            | 6.462                          | 692.35             | 4473.91            |
| A_68_P22422568 | chr3:109945463-109945507                          | NM_001163348:906        | Ntng1         | INSIDE                 | 1.972                                                        | 0.319                          | 1982.73            | 633.03             | 0.629                          | 1424.00            | 896.34             |
| A_68_P22393108 | chr3:104584185-104584229                          | NM_027982:233           | Ppm1j         | INSIDE                 | 1.972                                                        | 0.246                          | 2316.75            | 569.48             | 0.485                          | 1672.75            | 810.97             |
| A_68_P25614226 | chr8:3495954-3495998                              | NM_080461:2839          | Zip358        | INSIDE                 | 1.971                                                        | 2.538                          | 517.85             | 1314.41            | 5.003                          | 404.01             | 2021.19            |
| A_68_P23245374 | chr4:119088045-119088089                          | NM_029286:60            | Ccdc30        | INSIDE                 | 1.971                                                        | 0.321                          | 1956.19            | 627.93             | 0.633                          | 1382.91            | 875.07             |
| A_68_P31926782 | chr19:5082847-5082891                             | NM_001001885:2609       | Tmem151a      | INSIDE                 | 1.970                                                        | 2.443                          | 698.39             | 1706.27            | 4.812                          | 594.37             | 2860.14            |
| A_68_P21047273 | chr2:19831293-19831337                            | ENSMUST00000114610:-92  |               | PROMOTER               | 1.969                                                        | 2.237                          | 5125.79            | 11465.38           | 4.405                          | 3385.86            | 14914.46           |
| A_68_P28956732 | chr13:37918318-37918362                           | NM_001177868:-440       | Rreb1         | PROMOTER               | 1.968                                                        | 0.192                          | 2689.39            | 517.44             | 0.379                          | 1794.61            | 679.43             |
| A_68_P21485723 | chr2:103659521-103659569                          | ENSMUST00000167989:89   |               | INSIDE                 | 1.961                                                        | 2.496                          | 182.53             | 455.65             | 4.895                          | 181.30             | 887.47             |
| A_68_P28959944 | chr13:38437327-38437371                           | NM_007556:-236          | Bmp6          | PROMOTER               | 1.959                                                        | 0.216                          | 2341.21            | 506.63             | 0.424                          | 1669.47            | 707.81             |
| A_68_P25951933 | chr8:72975932-72975976                            | NM_001122830:24888      | Klhl26        | INSIDE                 | 1.959                                                        | 1.948                          | 433.02             | 843.53             | 3.816                          | 354.97             | 1354.58            |
| A_68_P25354352 | chr7:105326428-105326472                          | NM_007602:253           | Capn5         | INSIDE                 | 1.958                                                        | 0.284                          | 2352.49            | 668.53             | 0.556                          | 1727.60            | 961.11             |
| A_68_P23269531 | chr4:124337466-124337523                          | NM_011141:2606          | Pou3f1        | INSIDE                 | 1.952                                                        | 4.260                          | 241.30             | 1027.91            | 8.317                          | 93.99              | 781.72             |
| A_68_P25656260 | chr8:11561678-11561724                            | NM_011919:5635          | Ingl1         | INSIDE                 | 1.948                                                        | 1.552                          | 1273.73            | 1976.26            | 3.023                          | 996.74             | 3013.09            |
| A_68_P22134616 | chr3:52073560-52073612                            | NM_019739:1328          | Foxo1         | INSIDE                 | 1.940                                                        | 0.183                          | 2769.06            | 506.36             | 0.355                          | 2060.18            | 730.76             |
| A_68_P23424871 | chr4:152806869-152806913                          | NM_001099299:50049      | Ajap1         | INSIDE                 | 1.931                                                        | 1.860                          | 657.91             | 1224.04            | 3.592                          | 471.45             | 1693.38            |
| A_68_P30988237 | chr16:95807509-95807553                           | ENSMUST00000121809:670  |               | INSIDE                 | 1.927                                                        | 0.115                          | 3966.20            | 455.79             | 0.221                          | 2643.76            | 585.32             |
| A_68_P32773806 | chrX:155694082-155694126                          | NM_148945:53            | Rps6ka3       | INSIDE                 | 1.926                                                        | 0.244                          | 2420.69            | 589.55             | 0.469                          | 3876.93            | 1818.22            |
| A_68_P29874397 | chr14:105339298-105339349                         | NR_015593:300960        | D130009118Rik | INSIDE                 | 1.924                                                        | 1.521                          | 567.06             | 862.71             | 2.927                          | 459.99             | 1346.31            |
| A_68_P29613096 | chr14:55195734-55195778                           | NM_010590:742           | Jub           | INSIDE                 | 1.924                                                        | 5.119                          | 2649.16            | 13561.20           | 9.847                          | 2311.01            | 22755.52           |
| A_68_P31140216 | chr17:31649029-31649073                           | NM_021322:382           | Wdr4          | INSIDE                 | 1.916                                                        | 0.277                          | 1615.37            | 446.67             | 0.530                          | 1152.78            | 610.77             |
| A_68_P26663736 | chr9:79190551-79190595                            |                         |               | Unknown                | 1.914                                                        | 1.699                          | 749.13             | 1272.91            | 3.252                          | 610.66             | 1985.84            |
| A_68_P20975268 | chr2:5635854-5635898                              | NM_177343:-166          | Camk1d        | PROMOTER               | 1.910                                                        | 1.570                          | 441.71             | 693.26             | 2.998                          | 365.20             | 1094.94            |
| A_68_P30953523 | chr16:89885140-89885184                           | NM_009384:75910         | Tiam1         | INSIDE                 | 1.909                                                        | 1.563                          | 459.65             | 718.24             | 2.983                          | 319.79             | 953.89             |
| A_68_P32233091 | chrX:5660358-5660402                              | NM_001033211:158        | AU022751      | INSIDE                 | 1.908                                                        | 2.380                          | 272.91             | 649.47             | 4.540                          | 403.61             | 1832.32            |

| ProbeName      | Target position of probe on CpG island microarray | TargetID                | GeneSymbol    | CpG island Description | Ratio of relative methylation (TiO <sub>2</sub> -NP/Vehicle) | Sham group                     |                    |                    | TiO <sub>2</sub> -H group      |                    |                    |
|----------------|---------------------------------------------------|-------------------------|---------------|------------------------|--------------------------------------------------------------|--------------------------------|--------------------|--------------------|--------------------------------|--------------------|--------------------|
|                |                                                   |                         |               |                        |                                                              | Relative methylation (Cy5/Cy3) | Cy3 signal (Input) | Cy5 signal (MeDIP) | Relative methylation (Cy5/Cy3) | Cy3 signal (Input) | Cy5 signal (MeDIP) |
| A_68_P31257221 | chr17:56743113-56743157                           | NM_001163300:18730      | Safb          | INSIDE                 | 1.905                                                        | 1.514                          | 1938.43            | 2935.29            | 2.884                          | 1412.45            | 4074.11            |
| A_68_P26227387 | chr8:124078337-124078381                          | NM_133765:24348         | Fbxo31        | INSIDE                 | 1.904                                                        | 1.515                          | 1027.42            | 1556.91            | 2.886                          | 530.05             | 1529.47            |
| A_68_P23982393 | chr5:111308521-111308565                          | NM_024477:279           | Ttc28         | PROMOTER               | 1.902                                                        | 3.194                          | 198.86             | 635.17             | 6.075                          | 172.72             | 1049.32            |
| A_68_P31927969 | chr19:5307468-5307512                             | NM_001024717:9160       | Gal3st3       | INSIDE                 | 1.899                                                        | 2.270                          | 533.63             | 1211.34            | 4.310                          | 441.31             | 1901.92            |
| A_68_P25075289 | chr7:48157966-48158010                            | NM_021387:3341          | Vstm2b        | INSIDE                 | 1.899                                                        | 0.287                          | 1707.59            | 489.65             | 0.545                          | 1239.87            | 675.27             |
| A_68_P27812443 | chr11:54679796-54679846                           | NM_008248:-119          | Hint1         | DIVERGENT_PROMOTER     | 1.895                                                        | 2.380                          | 248.26             | 590.93             | 4.510                          | 173.83             | 783.91             |
| A_68_P27550645 | chr11:3093025-3093069                             | NM_030207:420           | Sfi1          | INSIDE                 | 1.895                                                        | 1.406                          | 3558.17            | 5003.50            | 2.665                          | 3254.57            | 8672.89            |
| A_68_P28553587 | chr12:77469901-77469960                           | NM_001172104:521        | Zbtb25        | INSIDE                 | 1.894                                                        | 1.822                          | 365.41             | 665.81             | 3.450                          | 245.61             | 847.38             |
| A_68_P22384844 | chr3:102975721-102975767                          | NM_026602:111           | Bcas2         | INSIDE                 | 1.891                                                        | 1.428                          | 987.01             | 1409.12            | 2.700                          | 677.36             | 1829.15            |
| A_68_P28182974 | chr11:120050877-120050921                         | NR_030682:272           | 2810410L24Rik | INSIDE                 | 1.885                                                        | 5.036                          | 1021.71            | 5145.36            | 9.492                          | 783.76             | 7439.62            |
| A_68_P27340413 | chr10:90634459-90634503                           | NM_001080129:-153       | Tmpo          | PROMOTER               | 1.883                                                        | 0.314                          | 1872.50            | 588.32             | 0.592                          | 1528.15            | 904.17             |
| A_68_P32773804 | chrX:155693758-155693802                          | NM_148945:-271          | Rps6ka3       | PROMOTER               | 1.882                                                        | 2.042                          | 3195.43            | 6523.51            | 3.843                          | 4290.60            | 16489.08           |
| A_68_P27100735 | chr10:43231159-43231203                           | NM_199028:32235         | Bend3         | INSIDE                 | 1.882                                                        | 2.038                          | 861.53             | 1755.85            | 3.836                          | 612.04             | 2347.96            |
| A_68_P26813047 | chr9:108008622-108008666                          | NM_007567:84070         | Bsn           | INSIDE                 | 1.882                                                        | 2.052                          | 813.15             | 1790.15            | 4.142                          | 688.49             | 2851.86            |
| A_68_P23321453 | chr4:133742651-133742697                          | NM_144527:326           | Ccdc21        | INSIDE                 | 1.880                                                        | 0.207                          | 10640.00           | 604.37             | 0.107                          | 7099.09            | 758.19             |
| A_68_P25083573 | chr7:50930678-50930722                            | NM_145582:3300          | Ctuf1         | INSIDE                 | 1.878                                                        | 1.646                          | 1003.66            | 1652.20            | 3.092                          | 792.73             | 2451.30            |
| A_68_P28724516 | chr12:109154117-109154161                         | NM_001079883:87486      | Bcl11b        | INSIDE                 | 1.875                                                        | 1.461                          | 719.33             | 1050.81            | 2.740                          | 531.10             | 1455.00            |
| A_68_P27550647 | chr11:3093206-3093251                             | NM_030207:238           | Sfi1          | INSIDE                 | 1.872                                                        | 1.403                          | 1094.27            | 1535.67            | 2.627                          | 929.28             | 2441.55            |
| A_68_P26885415 | chr9:121672022-121672066                          | NM_001166644:2894       | Zfp651        | INSIDE                 | 1.872                                                        | 2.020                          | 462.48             | 934.42             | 3.782                          | 345.42             | 1306.30            |
| A_68_P22351747 | chr3:96709002-96709046                            | NM_026229:197           | Gpr89         | INSIDE                 | 1.871                                                        | 1.576                          | 533.53             | 841.00             | 2.950                          | 437.29             | 1290.01            |
| A_68_P30083236 | chr15:25711164-25711208                           | NM_019472:158882        | Myo10         | INSIDE                 | 1.869                                                        | 1.508                          | 789.52             | 1190.24            | 2.818                          | 644.68             | 1816.39            |
| A_68_P25102684 | chr7:54305881-54305925                            | NM_026436:-107          | Tmem86a       | PROMOTER               | 1.869                                                        | 1.527                          | 543.73             | 830.13             | 2.853                          | 554.78             | 1582.91            |
| A_68_P32415800 | chrX:58145373-58145417                            | NM_009237:1211          | Sox3          | INSIDE                 | 1.865                                                        | 2.191                          | 259.66             | 568.79             | 4.086                          | 310.19             | 1267.33            |
| A_68_P22413865 | chr3:108456942-108456986                          | NM_001177770:57         | Clec1         | INSIDE                 | 1.864                                                        | 0.241                          | 2252.56            | 543.78             | 0.450                          | 1605.12            | 722.39             |
| A_68_P30346556 | chr15:76004532-76004576                           | NM_201394:21586         | Plec          | INSIDE                 | 1.862                                                        | 1.743                          | 380.99             | 664.23             | 3.246                          | 275.55             | 894.45             |
| A_68_P32374343 | chrX:48371227-48371271                            | NM_172413:-53           | Rap2c         | PROMOTER               | 1.855                                                        | 2.627                          | 2565.97            | 6739.85            | 4.874                          | 3133.60            | 15272.22           |
| A_68_P22415887 | chr3:108830521-108830565                          | NM_001163567:-17        | Fam102b       | PROMOTER               | 1.852                                                        | 20.640                         | 400.36             | 8263.26            | 38.234                         | 341.40             | 13053.19           |
| A_68_P31442548 | chr17:91487890-91487934                           | NM_020252:4230          | Nrxn1         | INSIDE                 | 1.850                                                        | 1.683                          | 641.82             | 1080.50            | 3.114                          | 507.56             | 1580.79            |
| A_68_P26804376 | chr9:106553310-106553354                          | NM_001160353:5108       | Grm2          | INSIDE                 | 1.848                                                        | 1.497                          | 648.69             | 970.98             | 2.766                          | 402.07             | 1112.10            |
| A_68_P27278803 | chr10:79229502-79229546                           | NM_144528:142           | Rnf126        | INSIDE                 | 1.847                                                        | 0.279                          | 2767.60            | 771.27             | 0.515                          | 1817.83            | 935.64             |
| A_68_P32746468 | chrX:148238435-148238479                          | NM_021523:632           | Huwc1         | INSIDE                 | 1.845                                                        | 0.347                          | 1722.71            | 597.79             | 0.640                          | 1999.73            | 1280.02            |
| A_68_P31050851 | chr17:12464717-12464771                           | NM_011948:46782         | Map3k4        | INSIDE                 | 1.845                                                        | 1.626                          | 385.90             | 627.60             | 3.001                          | 330.30             | 991.17             |
| A_68_P24863969 | chr6:134820135-134820179                          | NM_001167697:17721      | Gpr19         | INSIDE                 | 1.843                                                        | 4.031                          | 579.69             | 2336.83            | 7.431                          | 428.98             | 3187.78            |
| A_68_P32565628 | chrX:98989774-98989818                            | ENSMUST00000151231:-198 |               | DIVERGENT_PROMOTER     | 1.840                                                        | 2.425                          | 150.71             | 365.40             | 4.462                          | 276.66             | 1234.39            |
| A_68_P20619890 | chr1:134086976-134087020                          | NM_001033250:-1014      | Lemd1         | PROMOTER               | 1.840                                                        | 1.810                          | 1646.03            | 2980.13            | 3.332                          | 1149.32            | 3829.46            |
| A_68_P31836532 | chr18:75527265-75527309                           | NM_001042660:268        | Smad7         | INSIDE                 | 1.839                                                        | 0.168                          | 3019.38            | 506.90             | 0.309                          | 2303.56            | 711.01             |
| A_68_P27470613 | chr10:115024518-115024562                         | NM_010195:296           | Lgr5          | INSIDE                 | 1.839                                                        | 0.245                          | 2171.00            | 532.17             | 0.451                          | 1610.90            | 726.18             |
| A_68_P25506496 | chr7:134754584-134754628                          | NM_177226:3341          | Zfp629        | INSIDE                 | 1.839                                                        | 2.172                          | 607.26             | 1318.89            | 3.994                          | 438.16             | 1749.85            |
| A_68_P23996382 | chr5:113567569-113567615                          | NM_172884:24741         | Zp00026A02Rik | INSIDE                 | 1.838                                                        | 0.310                          | 2228.96            | 691.26             | 0.570                          | 1857.69            | 1058.77            |
| A_68_P24225086 | chr6:8209405-8209449                              | NR_033518:139           | Gm16039       | INSIDE                 | 1.837                                                        | 0.140                          | 5642.36            | 790.47             | 0.257                          | 3767.88            | 969.76             |
| A_68_P21908932 | chr2:180891704-180891748                          | NM_007906:-6            | Eef1a2        | PROMOTER               | 1.836                                                        | 0.204                          | 2968.38            | 604.30             | 0.374                          | 2100.95            | 785.23             |
| A_68_P25951936 | chr8:72976257-72976301                            | NM_001122830:24564      | Klhl26        | INSIDE                 | 1.835                                                        | 1.784                          | 393.61             | 702.20             | 3.273                          | 368.26             | 1205.30            |
| A_68_P27430001 | chr10:107598764-107598808                         | NM_027892:-669          | Ppp1r12a      | PROMOTER               | 1.832                                                        | 0.175                          | 3327.76            | 582.55             | 0.321                          | 2329.62            | 747.04             |
| A_68_P27877796 | chr11:66340159-66340203                           | NM_001034874:-552       | Shisa6        | PROMOTER               | 1.831                                                        | 1.519                          | 1562.74            | 2373.39            | 2.780                          | 1295.79            | 3602.52            |
| A_68_P23694987 | chr5:52867888-52867932                            |                         |               | Unknown                | 1.830                                                        | 0.337                          | 2158.42            | 726.74             | 0.616                          | 1507.62            | 929.16             |
| A_68_P20833279 | chr1:174412349-174412393                          | NM_033608:-77           | Igsf9         | PROMOTER               | 1.830                                                        | 0.193                          | 2408.90            | 465.85             | 0.354                          | 1925.94            | 681.49             |
| A_68_P25827306 | chr8:46023782-46023826                            | AK079043:-3291          |               | PROMOTER               | 1.828                                                        | 0.225                          | 3579.14            | 806.03             | 0.412                          | 2270.26            | 934.44             |
| A_68_P27356009 | chr10:93308576-93308623                           | NM_183199:14300         | Usp44         | INSIDE                 | 1.827                                                        | 1.592                          | 529.10             | 842.17             | 2.909                          | 453.10             | 1317.95            |
| A_68_P32130472 | chr19:44181487-44181534                           | NM_001162410:457        | Chuk          | INSIDE                 | 1.825                                                        | 0.327                          | 5135.69            | 1677.71            | 0.596                          | 3118.05            | 1858.58            |
| A_68_P24115931 | chr5:135825936-135825980                          | NM_033571:-97           | Fkbp6         | DIVERGENT_PROMOTER     | 1.824                                                        | 1.574                          | 704.41             | 1109.04            | 2.872                          | 547.06             | 1570.95            |
| A_68_P20008184 | chr1:5009350-5009394                              | NM_021374:135           | Rgs20         | INSIDE                 | 1.824                                                        | 1.630                          | 429.72             | 700.65             | 2.974                          | 327.89             | 975.19             |
| A_68_P30672035 | chr16:35769023-35769067                           | NM_153550:398           | Dirc2         | INSIDE                 | 1.823                                                        | 0.244                          | 2104.43            | 513.87             | 0.445                          | 1598.90            | 711.60             |
| A_68_P32071013 | chr19:32670325-32670369                           | NM_001201470:142        | Paps2         | INSIDE                 | 1.822                                                        | 0.205                          | 2227.45            | 457.03             | 0.374                          | 1521.46            | 568.70             |
| A_68_P30351139 | chr15:76741794-76741838                           | NM_001168276:14062      | Zfp647        | INSIDE                 | 1.822                                                        | 1.629                          | 833.74             | 1358.50            | 2.968                          | 654.49             | 1942.66            |
| A_68_P32137924 | chr19:45438347-45438391                           | NM_001037758:145        | Btre          | INSIDE                 | 1.821                                                        | 0.240                          | 3569.15            | 855.22             | 0.436                          | 2453.40            | 1070.74            |
| A_68_P30778641 | chr16:55974831-55974875                           | NR_027965:-122          | 2310061J03Rik | PROMOTER               | 1.820                                                        | 2.660                          | 3051.78            | 8118.32            | 4.842                          | 2453.14            | 11878.15           |
| A_68_P25957206 | chr8:74031971-74032015                            | NM_032398:3676          | Plvap         | INSIDE                 | 1.819                                                        | 0.236                          | 1907.23            | 450.22             | 0.429                          | 1399.19            | 600.73             |
| A_68_P31442543 | chr17:91487324-91487368                           | NM_020252:4796          | Nrxn1         | INSIDE                 | 1.817                                                        | 1.943                          | 1145.42            | 2225.01            | 3.529                          | 881.58             | 3111.41            |
| A_68_P22317890 | chr3:89017814-89017858                            | NM_001161824:421        | Mtx1          | INSIDE                 | 1.817                                                        | 0.158                          | 4322.03            | 684.84             | 0.288                          | 2702.35            | 778.07             |
| A_68_P20910363 | chr1:188791777-188791821                          | NM_033077:504           | DIPas1        | INSIDE                 | 1.814                                                        | 1.467                          | 667.22             | 978.63             | 2.661                          | 604.52             | 1608.39            |
| A_68_P28741417 | chr12:112215277-112215321                         | NM_175207:1933          | Ankrd9        | INSIDE                 | 1.813                                                        | 2.012                          | 421.16             | 847.49             | 3.649                          | 328.77             | 1199.66            |
| A_68_P28176530 | chr11:119072055-119072099                         | NM_172443:17737         | Tbcd1d16      | INSIDE                 | 1.812                                                        | 12.586                         | 1786.95            | 22490.69           | 22.804                         | 1619.18            | 36924.48           |
| A_68_P25021026 | chr7:29083763-29083810                            | NM_007866:3018          | Dli3          | INSIDE                 | 1.812                                                        | 3.280                          | 272.38             | 893.50             | 5.944                          | 265.45             | 1577.90            |
| A_68_P21394205 | chr2:84554801-84554845                            | NM_144887:499           | Zdihc5        | INSIDE                 | 1.812                                                        | 0.267                          | 2885.30            | 770.98             | 0.484                          | 2065.95            | 1000.18            |
| A_68_P31149893 | chr17:33787074-33787118                           | NM_001109913:35307      | Hnrmpn        | INSIDE                 | 1.808                                                        | 1.668                          | 589.13             | 982.79             | 3.016                          | 574.68             | 1733.42            |

| ProbeName      | Target position of probe on CpG island microarray | TargetID                | GeneSymbol    | CpG island Description | Ratio of relative methylation (TiO <sub>2</sub> -NP/Vehicle) | Sham group                     |                    |                    | TiO <sub>2</sub> -H group      |                    |                    |
|----------------|---------------------------------------------------|-------------------------|---------------|------------------------|--------------------------------------------------------------|--------------------------------|--------------------|--------------------|--------------------------------|--------------------|--------------------|
|                |                                                   |                         |               |                        |                                                              | Relative methylation (Cy5/Cy3) | Cy3 signal (Input) | Cy5 signal (MeDIP) | Relative methylation (Cy5/Cy3) | Cy3 signal (Input) | Cy5 signal (MeDIP) |
| A_68_P29054563 | chr13:55463630-55463674                           | NM_025828:492           | Lman2         | INSIDE                 | 1.805                                                        | 0.217                          | 2875.17            | 625.02             | 0.392                          | 1990.88            | 781.29             |
| A_68_P24944609 | chr6:149310012-149310056                          | ENSMUST00000120260:-173 |               | DIVERGENT_PROMOTER     | 1.805                                                        | 1.637                          | 759.41             | 1243.52            | 2.956                          | 581.59             | 1719.18            |
| A_68_P21568844 | chr2:119119741-119119785                          | NM_172269:5285          | Vps18         | INSIDE                 | 1.805                                                        | 2.271                          | 503.93             | 1144.60            | 4.099                          | 423.20             | 1734.62            |
| A_68_P21137825 | chr2:35959267-35959311                            | NM_001083126:292        | Lhx6          | INSIDE                 | 1.802                                                        | 0.194                          | 2317.86            | 450.57             | 0.350                          | 1731.51            | 606.54             |
| A_68_P24974188 | chr7:13609447-13609491                            | NM_011588:-32           | Trim28        | PROMOTER               | 1.799                                                        | 7.313                          | 835.47             | 6109.48            | 13.158                         | 753.92             | 9919.86            |
| A_68_P29731241 | chr14:76410609-76410653                           | NM_026816:42            | Gtf2i2        | INSIDE                 | 1.795                                                        | 0.312                          | 1724.64            | 538.92             | 0.561                          | 1194.18            | 669.73             |
| A_68_P21100044 | chr2:29744774-29744818                            | NM_001113214:-443       | Od2           | PROMOTER               | 1.790                                                        | 0.191                          | 4382.86            | 836.92             | 0.342                          | 2890.64            | 988.22             |
| A_68_P31779044 | chr18:65243606-65243650                           | NM_031881:60448         | Nedd4l        | INSIDE                 | 1.789                                                        | 1.879                          | 684.61             | 1286.05            | 3.361                          | 570.07             | 1915.77            |
| A_68_P24046894 | chr5:122303239-122303283                          | NM_175474:4224          | Fam109a       | INSIDE                 | 1.789                                                        | 1.939                          | 269.97             | 523.60             | 3.470                          | 184.59             | 640.48             |
| A_68_P22403732 | chr3:106838896-106838940                          | NM_008418:-161          | Kcna3         | PROMOTER               | 1.789                                                        | 0.142                          | 3571.14            | 507.56             | 0.254                          | 2358.78            | 599.69             |
| A_68_P20218129 | chr1:50984521-50984565                            | NM_019790:176           | Tmeff2        | INSIDE                 | 1.788                                                        | 0.328                          | 2119.57            | 694.49             | 0.586                          | 1600.50            | 937.73             |
| A_68_P30480363 | chr15:99301136-99301180                           | NM_029236:4003          | Bcdin3d       | INSIDE                 | 1.787                                                        | 1.554                          | 599.21             | 930.96             | 2.777                          | 461.69             | 1282.07            |
| A_68_P23278937 | chr4:125911565-125911609                          | NM_001145970:21977      | Mtap7d1       | INSIDE                 | 1.787                                                        | 1.469                          | 1469.61            | 2158.84            | 2.626                          | 1098.38            | 2883.83            |
| A_68_P22314993 | chr3:88447939-88447984                            | NM_001198912:22646      | Arhgef2       | INSIDE                 | 1.785                                                        | 1.673                          | 740.23             | 1238.66            | 2.987                          | 650.76             | 1944.13            |
| A_68_P21266388 | chr2:61643903-61643948                            | NM_009322:1416          | Tbr1          | INSIDE                 | 1.784                                                        | 0.355                          | 1982.06            | 703.06             | 0.633                          | 1308.33            | 827.97             |
| A_68_P30360709 | chr15:78370273-78370318                           | NM_009218:4480          | Sstr3         | INSIDE                 | 1.783                                                        | 1.666                          | 582.46             | 970.35             | 2.970                          | 447.44             | 1328.90            |
| A_68_P28164255 | chr11:117151945-117151989                         | NM_001113487:24407      | Septin9       | INSIDE                 | 1.782                                                        | 1.947                          | 363.47             | 707.70             | 3.471                          | 295.72             | 1026.33            |
| A_68_P31879481 | chr18:83126670-83126714                           | NM_001177464:42669      | Zfp516        | INSIDE                 | 1.781                                                        | 1.623                          | 1174.94            | 1906.40            | 2.889                          | 905.86             | 2617.09            |
| A_68_P27286214 | chr10:80363023-80363067                           | NM_013895:670           | Timm13        | INSIDE                 | 1.777                                                        | 0.239                          | 2267.77            | 540.95             | 0.424                          | 1599.29            | 677.80             |
| A_68_P24946817 | chr7:3637393-3637437                              | NM_029934:7713          | Mboat7        | INSIDE                 | 1.777                                                        | 3.262                          | 2159.27            | 7043.79            | 5.798                          | 1525.34            | 8843.73            |
| A_68_P23296719 | chr4:129138535-129138579                          | NM_133889:-366          | Bsdcl1        | PROMOTER               | 1.777                                                        | 2.524                          | 257.67             | 650.34             | 4.485                          | 232.11             | 1041.10            |
| A_68_P23358589 | chr4:140071100-140071144                          | NM_001112723:133549     | Arhgef10l     | INSIDE                 | 1.776                                                        | 1.709                          | 474.60             | 811.00             | 3.035                          | 406.30             | 1233.20            |
| A_68_P23199842 | chr4:108874395-108874439                          | NM_133885:461           | Osbpl9        | INSIDE                 | 1.776                                                        | 0.200                          | 3571.63            | 712.93             | 0.355                          | 2515.70            | 892.03             |
| A_68_P25090603 | chr7:52263124-52263168                            | NM_001008422:8473       | Scaf1         | INSIDE                 | 1.773                                                        | 1.772                          | 837.70             | 1484.02            | 3.142                          | 678.79             | 2132.59            |
| A_68_P31041951 | chr17:11033242-11033286                           | NM_016694:15            | Park2         | INSIDE                 | 1.772                                                        | 0.287                          | 1910.66            | 548.03             | 0.508                          | 1440.01            | 731.73             |
| A_68_P22325407 | chr3:90269682-90269726                            | NM_008727:84            | Npr1          | INSIDE                 | 1.772                                                        | 0.206                          | 2332.55            | 480.37             | 0.365                          | 1707.74            | 623.32             |
| A_68_P29509082 | chr14:31814863-31814907                           | NM_026911:-32           | Spoc1         | PROMOTER               | 1.770                                                        | 4.059                          | 489.82             | 1988.26            | 7.185                          | 437.64             | 3144.61            |
| A_68_P23984844 | chr5:111706164-111706208                          | NM_024477:397365        | Ttc28         | INSIDE                 | 1.770                                                        | 1.542                          | 1479.85            | 2281.56            | 2.729                          | 1118.60            | 3052.93            |
| A_68_P25048198 | chr7:35988774-35988818                            | NM_001024707:11568      | Lrp3          | INSIDE                 | 1.769                                                        | 1.947                          | 586.59             | 1141.93            | 3.444                          | 500.55             | 1723.88            |
| A_68_P28525539 | chr12:72419195-72419245                           | NM_001190466:8350       | Dact1         | INSIDE                 | 1.767                                                        | 2.627                          | 467.90             | 1229.28            | 4.641                          | 368.31             | 1709.50            |
| A_68_P30641174 | chr16:30309847-30309891                           | NM_008148:997           | Gp5           | INSIDE                 | 1.766                                                        | 0.320                          | 1564.95            | 500.53             | 0.565                          | 1214.54            | 685.85             |
| A_68_P20066646 | chr1:19204206-19204250                            | NM_001025305:2094       | Tcfap2b       | INSIDE                 | 1.766                                                        | 0.311                          | 4912.11            | 1525.68            | 0.548                          | 3553.92            | 1949.08            |
| A_68_P20347698 | chr1:74331582-74331626                            | NM_025580:-3            | Pnkd          | DIVERGENT_PROMOTER     | 1.765                                                        | 0.305                          | 1703.19            | 519.82             | 0.539                          | 1221.58            | 658.22             |
| A_68_P20022045 | chr1:9289343-9289387                              | NM_027671:447           | Sntg1         | INSIDE                 | 1.765                                                        | 3.599                          | 3399.54            | 12235.12           | 6.352                          | 2815.61            | 17886.00           |
| A_68_P26920733 | chr10:7500333-7500377                             | NM_145418:361           | BC013529      | INSIDE                 | 1.764                                                        | 0.232                          | 2535.06            | 586.93             | 0.408                          | 1864.52            | 761.54             |
| A_68_P24098211 | chr5:131915292-131915336                          | NM_177047:1102899       | Aut5          | INSIDE                 | 1.764                                                        | 1.814                          | 777.47             | 1410.48            | 3.201                          | 711.14             | 2276.02            |
| A_68_P31150930 | chr17:34048600-34048644                           | NM_001199733:2077       | Daxx          | INSIDE                 | 1.763                                                        | 1.564                          | 487.56             | 762.60             | 2.758                          | 369.37             | 1018.60            |
| A_68_P30025417 | chr15:12980979-12981031                           | NM_007666:122390        | Cdh6          | INSIDE                 | 1.763                                                        | 1.647                          | 512.34             | 843.97             | 2.904                          | 383.52             | 1113.55            |
| A_68_P27926647 | chr11:75344750-75344794                           | NM_001199284:-423       | Sle43a2       | PROMOTER               | 1.762                                                        | 0.159                          | 3975.62            | 633.93             | 0.281                          | 2785.27            | 782.43             |
| A_68_P27110004 | chr10:44878135-44878179                           | NM_011156:91137         | Prep          | INSIDE                 | 1.759                                                        | 1.456                          | 657.43             | 957.17             | 2.561                          | 534.61             | 1369.23            |
| A_68_P26348936 | chr9:21599583-21599627                            | NM_145611:3386          | Kank2         | INSIDE                 | 1.759                                                        | 1.910                          | 501.90             | 958.76             | 3.361                          | 448.01             | 1505.68            |
| A_68_P25957394 | chr8:74067191-74067235                            | NM_028617:384           | Fam125a       | INSIDE                 | 1.758                                                        | 0.273                          | 3039.25            | 828.37             | 0.479                          | 1670.19            | 800.38             |
| A_68_P25761256 | chr8:33120256-33120300                            | ENSMUST00000080782:-697 |               | PROMOTER               | 1.758                                                        | 5.073                          | 3771.00            | 19130.24           | 8.916                          | 2946.08            | 26268.20           |
| A_68_P23819019 | chr5:77380180-77380224                            | NM_025939:-233          | Paics         | PROMOTER               | 1.758                                                        | 0.241                          | 2192.33            | 527.64             | 0.423                          | 1553.11            | 657.01             |
| A_68_P30346558 | chr15:76004732-76004776                           | NM_201394:21386         | Plec          | INSIDE                 | 1.757                                                        | 2.136                          | 282.12             | 602.52             | 3.752                          | 235.14             | 882.35             |
| A_68_P23250319 | chr4:119941839-119941885                          | NM_194060:18004         | Foxo6         | INSIDE                 | 1.757                                                        | 2.373                          | 474.54             | 1126.11            | 4.169                          | 328.99             | 1371.62            |
| A_68_P29880580 | chr14:106505493-106505537                         | NM_198601:100           | Trim52        | INSIDE                 | 1.755                                                        | 2.108                          | 518.00             | 1092.14            | 3.700                          | 395.37             | 1462.87            |
| A_68_P25416834 | chr7:118199064-118199108                          | NM_009431:26622         | Ctr9          | INSIDE                 | 1.755                                                        | 1.489                          | 700.82             | 1043.42            | 2.613                          | 551.07             | 1439.80            |
| A_68_P26870880 | chr9:119071809-119071853                          | NM_146230:-5619         | Acaa1b        | PROMOTER               | 1.752                                                        | 2.371                          | 214.86             | 509.47             | 4.155                          | 234.49             | 974.38             |
| A_68_P30346580 | chr15:76007443-76007487                           | NM_201394:18676         | Plec          | INSIDE                 | 1.750                                                        | 1.639                          | 487.93             | 799.57             | 2.867                          | 377.14             | 1081.42            |
| A_68_P23195055 | chr4:107890802-107890861                          | NM_001167936:-304       | Zygl1a        | PROMOTER               | 1.750                                                        | 1.967                          | 828.18             | 1628.84            | 3.443                          | 646.09             | 2224.34            |
| A_68_P25729013 | A_68_P25729013                                    |                         |               | Unknown                | 1.749                                                        | 2.201                          | 219.76             | 483.64             | 3.848                          | 128.99             | 496.36             |
| A_68_P21823609 | chr2:165221660-165221704                          | NM_029021:4212          | 4833422F24Rik | INSIDE                 | 1.748                                                        | 2.230                          | 594.07             | 1324.93            | 3.899                          | 539.25             | 2102.65            |
| A_68_P22540268 | chr3:132612964-132613008                          | NM_001029836:269        | Npnt          | INSIDE                 | 1.747                                                        | 1.714                          | 1731.25            | 2966.97            | 2.994                          | 1385.21            | 4146.86            |
| A_68_P21070914 | chr2:25111268-25111312                            | NM_177344:332           | Tmem203       | INSIDE                 | 1.743                                                        | 0.151                          | 3164.81            | 478.67             | 0.264                          | 2143.55            | 565.17             |
| A_68_P28940414 | chr13:34838852-34838896                           | NM_138746:7364          | Fam50b        | INSIDE                 | 1.742                                                        | 1.574                          | 689.16             | 1084.99            | 2.743                          | 604.58             | 1658.24            |
| A_68_P28550370 | chr12:76919981-76920025                           | NM_001005510:698        | Syne2         | INSIDE                 | 1.740                                                        | 0.195                          | 2841.57            | 554.76             | 0.340                          | 2189.70            | 743.85             |
| A_68_P25656209 | chr8:11555685-11555729                            | NM_011919:-359          | Ing1          | DIVERGENT_PROMOTER     | 1.740                                                        | 0.270                          | 5636.96            | 1523.50            | 0.470                          | 3196.92            | 1503.60            |
| A_68_P20832394 | chr1:174256462-174256506                          | NM_008429:2910          | Kcnj9         | INSIDE                 | 1.738                                                        | 0.292                          | 1705.00            | 498.67             | 0.508                          | 1191.95            | 605.77             |
| A_68_P24620361 | chr6:88149067-88149115                            | NM_008090:433           | Gata2         | INSIDE                 | 1.736                                                        | 2.264                          | 284.27             | 643.48             | 3.930                          | 220.78             | 867.73             |
| A_68_P22148834 | chr3:54437446-54437490                            | ENSMUST00000172420:2108 |               | INSIDE                 | 1.733                                                        | 3.146                          | 1027.70            | 3233.13            | 5.453                          | 728.58             | 4267.43            |
| A_68_P28202484 | chr12:4824078-4824122                             | NM_025323:-313          | 0610009D07Rik | PROMOTER               | 1.732                                                        | 0.265                          | 2234.03            | 592.81             | 0.459                          | 1788.98            | 821.98             |
| A_68_P22397119 | chr3:105261830-105261874                          | NM_019931:119           | Kcnd3         | INSIDE                 | 1.731                                                        | 1.781                          | 303.17             | 539.90             | 3.083                          | 250.77             | 773.21             |
| A_68_P21116406 | chr2:32470512-32470556                            | NM_001025310:8054       | St6galnac6    | INSIDE                 | 1.731                                                        | 2.288                          | 358.67             | 820.74             | 3.961                          | 284.96             | 1128.59            |
| A_68_P32668459 | chrX:130222079-130222123                          | NM_001105245:1432       | Pcdh19        | INSIDE                 | 1.730                                                        | 2.137                          | 285.14             | 609.41             | 3.698                          | 250.74             | 927.10             |

| ProbeName      | Target position of probe on CpG island microarray | TargetID                   | GeneSymbol    | CpG island Description | Ratio of relative methylation (TiO <sub>2</sub> -NP/Vehicle) | Sham group                     |                    |                    | TiO <sub>2</sub> -H group      |                    |                    |
|----------------|---------------------------------------------------|----------------------------|---------------|------------------------|--------------------------------------------------------------|--------------------------------|--------------------|--------------------|--------------------------------|--------------------|--------------------|
|                |                                                   |                            |               |                        |                                                              | Relative methylation (Cy5/Cy3) | Cy3 signal (Input) | Cy5 signal (MeDIP) | Relative methylation (Cy5/Cy3) | Cy3 signal (Input) | Cy5 signal (MeDIP) |
| A_68_P28748396 | chr12:113414015-113414059                         | NM_001097621:29618         | Kif26a        | INSIDE                 | 1.730                                                        | 1.975                          | 900.70             | 1779.15            | 3.418                          | 683.57             | 2336.22            |
| A_68_P24983572 | chr7:17428015-17428059                            | NM_178900:377              | Prkd2         | PROMOTER               | 1.730                                                        | 0.202                          | 2521.34            | 508.68             | 0.349                          | 1818.88            | 634.89             |
| A_68_P31424359 | chr17:88039798-88039842                           | NM_008532:4502             | Epcam         | PROMOTER               | 1.729                                                        | 1.980                          | 800.19             | 1584.07            | 3.422                          | 598.90             | 2049.64            |
| A_68_P31092362 | chr17:23694847-23694891                           | NM_001033496:6325          | Zfp213        | INSIDE                 | 1.729                                                        | 1.803                          | 713.38             | 1286.19            | 3.118                          | 601.25             | 1874.66            |
| A_68_P29591680 | chr14:49685967-49686011                           | NM_144535:-181             | Mudeng        | PROMOTER               | 1.729                                                        | 2.017                          | 1046.28            | 2109.90            | 3.486                          | 737.81             | 2572.08            |
| A_68_P25101651 | chr7:54101747-54101791                            | NM_001136069:-683          | Ldha          | PROMOTER               | 1.729                                                        | 2.175                          | 339.47             | 738.22             | 3.760                          | 284.90             | 1071.22            |
| A_68_P23308456 | chr4:131375306-131375350                          | NM_001083119:18865         | Ptpnu         | INSIDE                 | 1.729                                                        | 1.597                          | 1042.14            | 1664.19            | 2.761                          | 864.47             | 2386.37            |
| A_68_P30513214 | chr16:5013320-5013364                             | NM_133185:304              | Rogdi         | INSIDE                 | 1.728                                                        | 0.251                          | 2249.34            | 563.58             | 0.433                          | 1525.30            | 660.29             |
| A_68_P26226906 | chr8:123992825-123992870                          | ENSMUST00000127664:1558107 |               | INSIDE                 | 1.728                                                        | 1.688                          | 615.85             | 1039.39            | 2.917                          | 472.80             | 1379.09            |
| A_68_P21874518 | chr2:174125914-174125958                          | NM_201617:2577             | Gnas          | INSIDE                 | 1.728                                                        | 1.699                          | 452.44             | 768.55             | 2.936                          | 400.19             | 1174.77            |
| A_68_P20351044 | chr7:74931604-74931648                            | NM_153111:356              | Fev           | INSIDE                 | 1.728                                                        | 0.267                          | 2685.54            | 716.56             | 0.461                          | 1784.15            | 822.48             |
| A_68_P25587962 | chr7:148480819-148480877                          | NM_007878:2944             | Drd4          | INSIDE                 | 1.726                                                        | 1.860                          | 348.96             | 648.99             | 3.211                          | 289.29             | 928.85             |
| A_68_P28157433 | chr11:115971055-115971099                         | NM_001205081:473           | Trim47        | INSIDE                 | 1.725                                                        | 5.091                          | 5170.14            | 26322.32           | 8.782                          | 3817.22            | 33524.51           |
| A_68_P26750366 | chr9:96896367-96896411                            | NM_145134:22386            | Spsb4         | INSIDE                 | 1.725                                                        | 1.856                          | 566.28             | 1051.28            | 3.202                          | 489.07             | 1566.15            |
| A_68_P25827948 | chr8:46108836-46108887                            | NM_001081286:73300         |               | INSIDE                 | 1.725                                                        | 1.680                          | 466.67             | 784.00             | 2.899                          | 425.62             | 1233.75            |
| A_68_P21874746 | chr2:174153286-174153330                          | NR_003258:-106             | Gnas          | PROMOTER               | 1.724                                                        | 1.934                          | 675.21             | 1305.65            | 3.334                          | 531.82             | 1773.19            |
| A_68_P23227295 | chr4:115690207-115690251                          | NM_010173:279              | Faah          | INSIDE                 | 1.722                                                        | 0.350                          | 2630.89            | 920.09             | 0.602                          | 2040.46            | 1228.88            |
| A_68_P22071595 | chr3:38784639-38784683                            | NM_183221:-1201            | Fat4          | PROMOTER               | 1.722                                                        | 0.178                          | 2961.97            | 526.82             | 0.306                          | 2064.19            | 632.37             |
| A_68_P25614227 | chr8:3496122-3496166                              | NM_080461:3007             | Zfp358        | INSIDE                 | 1.721                                                        | 2.260                          | 486.82             | 1100.25            | 3.890                          | 447.45             | 1740.49            |
| A_68_P25029686 | chr7:30836414-30836458                            | NM_011748:-21              | Zfp14         | PROMOTER               | 1.721                                                        | 0.324                          | 2527.42            | 818.75             | 0.558                          | 1723.15            | 960.79             |
| A_68_P26875426 | chr9:119883221-119883265                          | NM_153287:10534            | Csmpl1        | INSIDE                 | 1.720                                                        | 2.451                          | 1093.10            | 2679.13            | 4.217                          | 802.54             | 3384.01            |
| A_68_P25011335 | chr7:26473118-26473162                            | NM_011577:1120             | Tgfb1         | INSIDE                 | 1.719                                                        | 3.422                          | 493.96             | 1690.29            | 5.884                          | 412.39             | 2426.41            |
| A_68_P20624277 | chr1:134777288-134777332                          | NM_010732:379              | Lrrn2         | INSIDE                 | 1.718                                                        | 0.294                          | 1764.76            | 519.54             | 0.506                          | 1301.43            | 658.12             |
| A_68_P23195766 | chr4:108055710-108055754                          | NM_001099303:222           | Fam159a       | INSIDE                 | 1.714                                                        | 3.555                          | 592.30             | 2105.86            | 6.094                          | 439.28             | 2676.84            |
| A_68_P25026465 | chr7:30089302-30089346                            | NM_013874:301              | Dpfl          | INSIDE                 | 1.713                                                        | 0.358                          | 1868.51            | 669.59             | 0.614                          | 1280.73            | 786.10             |
| A_68_P23396583 | chr4:148179764-148179808                          | NM_027195:1286             | Cas2l         | INSIDE                 | 1.713                                                        | 0.271                          | 2501.03            | 678.08             | 0.464                          | 1694.65            | 786.98             |
| A_68_P24951677 | chr7:4982359-4982403                              | NM_001033383:10403         | Zfp865        | INSIDE                 | 1.711                                                        | 1.571                          | 765.01             | 1202.04            | 2.688                          | 647.70             | 1740.82            |
| A_68_P24992504 | chr7:19878717-19878763                            | NM_001025364:2293          | Rtn2          | INSIDE                 | 1.710                                                        | 2.102                          | 784.71             | 1649.76            | 3.595                          | 597.71             | 2148.90            |
| A_68_P24686655 | chr6:99472528-99472572                            | ENSMUST00000155466:144241  |               | INSIDE                 | 1.710                                                        | 0.110                          | 4849.00            | 532.00             | 0.188                          | 3077.81            | 577.52             |
| A_68_P29880583 | chr14:106505860-106505904                         | NM_198601:468              | Trim52        | INSIDE                 | 1.709                                                        | 2.239                          | 287.69             | 644.21             | 3.828                          | 221.37             | 847.33             |
| A_68_P21782541 | chr2:158187217-158187261                          | NR_015463:7                | 9430008C03Rik | INSIDE                 | 1.706                                                        | 0.236                          | 2003.52            | 473.16             | 0.403                          | 1240.63            | 499.96             |
| A_68_P27184377 | chr10:61596546-61596590                           | NM_009719:731              | Neurog3       | INSIDE                 | 1.705                                                        | 0.112                          | 4629.82            | 517.03             | 0.190                          | 2985.56            | 568.41             |
| A_68_P27100736 | chr10:43231246-43231290                           | NM_199028:32323            | Bend3         | INSIDE                 | 1.705                                                        | 1.921                          | 799.67             | 1535.84            | 3.275                          | 751.16             | 2460.31            |
| A_68_P27902198 | chr11:70513486-70513530                           | NM_213729:149              | Inca1         | INSIDE                 | 1.704                                                        | 0.373                          | 1682.66            | 626.86             | 0.635                          | 1299.08            | 824.54             |
| A_68_P28272752 | chr12:17888520-17888564                           | ENSMUST00000169996:-460    |               | PROMOTER               | 1.700                                                        | 0.287                          | 2387.44            | 686.31             | 0.489                          | 1848.97            | 903.42             |
| A_68_P22059401 | chr3:36570355-36570399                            | NM_019510:18713            | Trpc3         | INSIDE                 | 1.700                                                        | 1.747                          | 840.14             | 1467.61            | 2.970                          | 787.56             | 2338.68            |
| A_68_P23977822 | chr5:110536969-110537013                          | NM_145147:226              | Gtpbp6        | INSIDE                 | 1.699                                                        | 0.315                          | 2420.61            | 761.52             | 0.534                          | 1757.54            | 939.16             |
| A_68_P23317854 | chr4:133042232-133042276                          | NM_175307:6207             | Fam46b        | INSIDE                 | 1.698                                                        | 1.413                          | 1009.88            | 1427.21            | 2.400                          | 720.35             | 1728.53            |
| A_68_P27928205 | chr11:75608766-75608811                           | NM_007873:771              | Doc2b         | INSIDE                 | 1.696                                                        | 0.319                          | 1994.14            | 635.34             | 0.540                          | 1600.45            | 865.04             |
| A_68_P27913317 | chr11:72609127-72609171                           | NM_001024926:193           | Cyb5d2        | INSIDE                 | 1.695                                                        | 0.215                          | 2830.15            | 607.14             | 0.364                          | 2067.92            | 751.72             |
| A_68_P24837693 | chr6:128150794-128150838                          | ENSMUST00000071101:-175    |               | PROMOTER               | 1.695                                                        | 0.312                          | 4102.06            | 1279.11            | 0.529                          | 3031.90            | 1602.73            |
| A_68_P23984176 | chr5:111612120-111612164                          | NM_024477:303321           | Ttc28         | INSIDE                 | 1.695                                                        | 1.505                          | 1079.85            | 1624.98            | 2.551                          | 796.72             | 2032.28            |
| A_68_P24156244 | chr5:144131752-144131796                          | NM_133355:6188             | Grid2ip       | INSIDE                 | 1.694                                                        | 0.303                          | 1815.43            | 549.57             | 0.513                          | 1340.64            | 687.37             |
| A_68_P23982395 | chr5:111308888-111308932                          | NM_024477:89               | Ttc28         | INSIDE                 | 1.694                                                        | 2.668                          | 340.56             | 908.75             | 4.521                          | 237.19             | 1072.43            |
| A_68_P20347699 | chr1:74331738-74331785                            | NM_025580:154              | Pnkd          | INSIDE                 | 1.694                                                        | 1.725                          | 655.05             | 1130.24            | 2.923                          | 482.29             | 1409.71            |
| A_68_P20741943 | chr1:158134761-158134805                          | NM_177838:374              | Fam163a       | INSIDE                 | 1.693                                                        | 0.263                          | 2869.64            | 754.65             | 0.445                          | 1812.02            | 806.75             |
| A_68_P22449311 | chr3:116126122-116126166                          | NM_001080818:806           | Cdc14a        | INSIDE                 | 1.691                                                        | 0.245                          | 1918.75            | 469.38             | 0.414                          | 1518.17            | 628.04             |
| A_68_P21682258 | chr2:139892550-139892594                          | NM_001159640:-51           | Tasp1         | PROMOTER               | 1.691                                                        | 0.358                          | 1664.46            | 596.21             | 0.606                          | 1402.58            | 849.45             |
| A_68_P20015303 | chr1:7078680-7078724                              | NM_183028:-298             | Pcmtd1        | PROMOTER               | 1.689                                                        | 2.152                          | 627.41             | 4707.41            | 3.694                          | 1689.57            | 6241.42            |
| A_68_P32070012 | chr19:32462008-32462052                           | NM_144792:914              | Sgms1         | INSIDE                 | 1.688                                                        | 0.367                          | 2034.86            | 745.92             | 0.619                          | 1583.37            | 979.49             |
| A_68_P32542578 | chrX:92907030-92907074                            | NM_001034907:36            | Zc3h12b       | INSIDE                 | 1.685                                                        | 1.411                          | 1150.99            | 1624.49            | 2.379                          | 1422.01            | 3382.68            |
| A_68_P31107655 | chr17:26122056-26122100                           | NM_153140:36727            | Rab11fip3     | DOWNSTREAM             | 1.685                                                        | 6.674                          | 899.31             | 6001.87            | 11.249                         | 635.66             | 7150.21            |
| A_68_P25730016 | chr8:27096591-27096635                            | NM_029037:7981             | 4930444A02Rik | INSIDE                 | 1.685                                                        | 1.666                          | 858.07             | 1429.54            | 2.808                          | 702.41             | 1972.07            |
| A_68_P23192163 | chr4:107356485-107356529                          | NM_019872:261              | Dmrtb1        | INSIDE                 | 1.685                                                        | 2.808                          | 415.51             | 1166.68            | 4.732                          | 366.10             | 1732.21            |
| A_68_P25952523 | chr8:73063414-73063459                            | NM_007924:-137             | Ell           | PROMOTER               | 1.683                                                        | 0.270                          | 1813.60            | 490.19             | 0.455                          | 1275.50            | 580.29             |
| A_68_P20141345 | chr1:34986894-34986938                            |                            | Unknown       |                        | 1.683                                                        | 1.997                          | 974.32             | 1946.03            | 3.362                          | 887.68             | 2984.15            |
| A_68_P27288895 | chr10:80788735-80788779                           | NM_027381:4909             | 2510012J08Rik | INSIDE                 | 1.682                                                        | 1.954                          | 425.68             | 831.64             | 3.286                          | 321.71             | 1057.14            |
| A_68_P25088121 | chr7:51807262-51807306                            | NM_009473:2009             | Nr1h2         | INSIDE                 | 1.682                                                        | 1.730                          | 1979.26            | 3424.77            | 2.910                          | 1609.46            | 4683.19            |
| A_68_P21111931 | chr2:31742789-31742833                            | NM_011836:10               | Lamc3         | INSIDE                 | 1.682                                                        | 2.699                          | 2216.13            | 5982.30            | 5.440                          | 1867.86            | 8480.68            |
| A_68_P20910361 | chr1:188791550-188791594                          | NM_033077:278              | DIPas1        | INSIDE                 | 1.682                                                        | 2.248                          | 960.00             | 2158.23            | 3.782                          | 797.59             | 3016.45            |
| A_68_P32266426 | chrX:13063861-13063905                            | NM_173415:19085            | Nyx           | INSIDE                 | 1.681                                                        | 1.889                          | 334.08             | 631.22             | 3.176                          | 589.98             | 1873.51            |
| A_68_P32543327 | chrX:93163621-93163665                            |                            | Unknown       |                        | 1.678                                                        | 2.439                          | 1011.71            | 2467.70            | 4.093                          | 1285.90            | 5262.57            |
| A_68_P32696393 | chrX:136405600-136405644                          | NM_001193309:571           | Morc4         | INSIDE                 | 1.677                                                        | 0.399                          | 1891.42            | 754.02             | 0.668                          | 2472.22            | 1652.64            |
| A_68_P28080237 | chr11:102417265-102417309                         | NM_001159492:186           | Gpatch8       | INSIDE                 | 1.677                                                        | 0.216                          | 3121.03            | 675.32             | 0.363                          | 2300.98            | 834.83             |
| A_68_P27765617 | chr11:45869706-45869750                           | NM_009616:240              | Adam19        | INSIDE                 | 1.677                                                        | 0.172                          | 2823.73            | 486.49             | 0.289                          | 1961.13            | 566.57             |

| ProbeName      | Target position of probe on CpG island microarray | TargetID                 | GeneSymbol    | CpG island Description | Ratio of relative methylation (TiO <sub>2</sub> -NP/Vehicle) | Sham group                     |                    |                    | TiO <sub>2</sub> -H group      |                    |                    |
|----------------|---------------------------------------------------|--------------------------|---------------|------------------------|--------------------------------------------------------------|--------------------------------|--------------------|--------------------|--------------------------------|--------------------|--------------------|
|                |                                                   |                          |               |                        |                                                              | Relative methylation (Cy5/Cy3) | Cy3 signal (Input) | Cy5 signal (MeDIP) | Relative methylation (Cy5/Cy3) | Cy3 signal (Input) | Cy5 signal (MeDIP) |
| A_68_P28575795 | chr12:81564283-81564327                           | NM_133798:223            | Exd2          | INSIDE                 | 1.675                                                        | 2.365                          | 4896.40            | 11578.73           | 3.960                          | 3661.54            | 14500.29           |
| A_68_P25505622 | chr7:134587895-134587939                          | NM_175163:4756           | Zfp689        | INSIDE                 | 1.674                                                        | 2.210                          | 702.77             | 1552.86            | 3.698                          | 587.12             | 2171.29            |
| A_68_P21843351 | chr2:168581527-168581571                          | NM_175303:11153          | Sall4         | INSIDE                 | 1.674                                                        | 1.382                          | 1585.45            | 2190.77            | 2.313                          | 1173.46            | 2714.67            |
| A_68_P30533731 | chr16:8672077-8672121                             | NM_025821:148            | Carhsp1       | INSIDE                 | 1.672                                                        | 0.146                          | 3146.51            | 460.63             | 0.245                          | 2201.25            | 538.75             |
| A_68_P30388853 | chr15:83341230-83341274                           | NM_178869:85             | Ttll1         | INSIDE                 | 1.671                                                        | 0.332                          | 1781.62            | 590.68             | 0.554                          | 1213.30            | 672.35             |
| A_68_P29024947 | chr13:49478476-49478520                           | NM_001039179:41581       | Bicd2         | INSIDE                 | 1.671                                                        | 2.133                          | 233.03             | 496.98             | 3.564                          | 197.56             | 704.06             |
| A_68_P28151695 | chr11:115024532-115024576                         | NM_012030:100            | Slc9a3r1      | PROMOTER               | 1.671                                                        | 0.282                          | 1630.69            | 459.78             | 0.471                          | 1205.14            | 567.95             |
| A_68_P23818508 | chr5:77287446-77287490                            | NM_001163793:17845       | C530008M17Rik | INSIDE                 | 1.671                                                        | 1.383                          | 979.12             | 1353.77            | 2.311                          | 680.53             | 1572.60            |
| A_68_P22314483 | chr3:88357962-88358006                            | NM_033526:347            | Ubqln4        | INSIDE                 | 1.671                                                        | 1.563                          | 4922.57            | 7695.81            | 2.612                          | 3964.44            | 10354.34           |
| A_68_P28036506 | chr11:94937357-94937401                           | NM_013565:650            | Itga3         | INSIDE                 | 1.670                                                        | 0.113                          | 4784.33            | 540.29             | 0.189                          | 3225.48            | 608.12             |
| A_68_P31001860 | chr16:98144127-98144171                           | NM_174847:95             | C2cd2         | INSIDE                 | 1.669                                                        | 0.354                          | 1662.37            | 589.29             | 0.592                          | 1271.53            | 752.40             |
| A_68_P25952090 | chr8:73000940-73000985                            | NM_001122830:-120        | Klhl26        | PROMOTER               | 1.669                                                        | 0.330                          | 1622.05            | 534.58             | 0.550                          | 1096.92            | 603.54             |
| A_68_P29651209 | chr14:62267312-62267356                           | NR_028264:33876          | Dleu2         | INSIDE                 | 1.668                                                        | 0.215                          | 2631.81            | 566.47             | 0.359                          | 1978.19            | 710.00             |
| A_68_P20930616 | chr1:191994691-191994750                          | NM_008937:-161           | Prox1         | PROMOTER               | 1.668                                                        | 2.216                          | 242.53             | 537.35             | 3.696                          | 169.99             | 628.26             |
| A_68_P23588862 | chr5:33778061-33778105                            | ENSMUST00000030994:-4238 |               | PROMOTER               | 1.666                                                        | 0.413                          | 4343.86            | 1792.73            | 0.688                          | 2983.03            | 2051.08            |
| A_68_P27567653 | chr11:6174835-6174879                             | NM_134020:-16            | Tmed4         | PROMOTER               | 1.665                                                        | 0.110                          | 5812.34            | 641.98             | 0.184                          | 4030.60            | 741.25             |
| A_68_P29712960 | chr14:72932250-72932294                           | NM_207366:177538         | Fndc3a        | DOWNSTREAM             | 1.664                                                        | 0.301                          | 1859.19            | 559.88             | 0.501                          | 1521.85            | 762.55             |
| A_68_P24810881 | chr6:122824922-122824967                          | NM_026267:370            | Necap1        | INSIDE                 | 1.664                                                        | 0.234                          | 2510.08            | 587.64             | 0.390                          | 2010.55            | 783.17             |
| A_68_P31418978 | chr17:87152455-87152501                           | NM_010137:-725           | Epas1         | PROMOTER               | 1.663                                                        | 0.353                          | 2221.64            | 784.05             | 0.587                          | 1898.75            | 1114.31            |
| A_68_P24135223 | chr5:139856324-139856369                          | NM_030258:-274           | Gpr146        | PROMOTER               | 1.662                                                        | 1.968                          | 274.18             | 539.44             | 3.269                          | 202.68             | 662.60             |
| A_68_P21278824 | chr2:63936695-63936739                            | NM_021716:-647           | Fign          | PROMOTER               | 1.661                                                        | 2.118                          | 538.99             | 1141.77            | 3.518                          | 411.11             | 1446.40            |
| A_68_P24155795 | chr5:144031809-144031857                          | NM_017467:-131           | Zfp316        | PROMOTER               | 1.660                                                        | 0.329                          | 1913.01            | 630.08             | 0.547                          | 1443.98            | 789.70             |
| A_68_P32260575 | chrX:11705762-11705806                            | NM_001168321:31697       | Bcor          | INSIDE                 | 1.659                                                        | 0.268                          | 2609.74            | 699.09             | 0.445                          | 2866.64            | 1274.23            |
| A_68_P27280127 | chr10:79440201-79440245                           | NM_001003949:6853        | ORF61         | INSIDE                 | 1.659                                                        | 2.195                          | 695.17             | 1526.00            | 3.641                          | 559.28             | 2036.57            |
| A_68_P26804377 | chr9:106553386-106553432                          | NM_001160353:5032        | Grm2          | INSIDE                 | 1.656                                                        | 1.807                          | 377.80             | 682.59             | 2.992                          | 294.56             | 881.45             |
| A_68_P25183344 | chr7:72672119-72672163                            |                          |               | Unknown                | 1.656                                                        | 0.306                          | 2307.21            | 706.04             | 0.507                          | 1891.50            | 958.67             |
| A_68_P23417006 | chr4:151552589-151552633                          | NM_001146057:-7632       | Acot7         | PROMOTER               | 1.656                                                        | 0.299                          | 1702.59            | 509.26             | 0.495                          | 1356.58            | 671.96             |
| A_68_P20552784 | chr1:120524752-120524796                          | NM_023755:253            | Tcfcp2l1      | INSIDE                 | 1.656                                                        | 0.287                          | 2154.08            | 618.23             | 0.475                          | 1761.18            | 836.84             |
| A_68_P25599895 | chr7:150481208-150481262                          | NR_001461:1218           | Kcnqlot1      | INSIDE                 | 1.654                                                        | 1.374                          | 2449.59            | 3366.09            | 2.272                          | 1823.34            | 4142.94            |
| A_68_P26537272 | chr9:56468941-56468985                            | NM_181074:64098          | Lingo1        | INSIDE                 | 1.653                                                        | 3.085                          | 633.99             | 1956.15            | 5.099                          | 577.55             | 2944.92            |
| A_68_P31152226 | chr17:34257950-34257994                           | NR_037970:-1127          | Brd2          | PROMOTER               | 1.652                                                        | 0.313                          | 3155.24            | 987.92             | 0.517                          | 2093.02            | 1082.94            |
| A_68_P24954141 | chr7:6084325-6084369                              | NM_001013012:23227       | Zfp787        | INSIDE                 | 1.652                                                        | 1.816                          | 707.21             | 1284.10            | 2.999                          | 635.80             | 1906.85            |
| A_68_P29699002 | chr14:70477756-70477800                           | NM_018781:527            | Egr3          | INSIDE                 | 1.651                                                        | 0.223                          | 2097.74            | 468.42             | 0.369                          | 1575.88            | 581.14             |
| A_68_P31841472 | chr18:76305759-76305803                           | NM_145356:325949         | Zbtb7c        | INSIDE                 | 1.650                                                        | 1.498                          | 831.82             | 1246.11            | 2.472                          | 691.68             | 1709.80            |
| A_68_P30484944 | chr15:100111219-100111263                         | NM_183109:-27            | Tmprss12      | PROMOTER               | 1.650                                                        | 2.002                          | 494.51             | 989.99             | 3.304                          | 430.45             | 1422.16            |
| A_68_P24634428 | chr6:90686241-90686285                            | NM_001134384:73855       | Iqsec1        | INSIDE                 | 1.650                                                        | 0.353                          | 3009.87            | 1062.80            | 0.582                          | 2298.95            | 1339.06            |
| A_68_P20058120 | chr1:17082054-17082098                            | NM_020604:5894           | Jph1          | INSIDE                 | 1.650                                                        | 1.440                          | 1229.62            | 1770.80            | 2.376                          | 920.75             | 2187.68            |
| A_68_P26467526 | chr9:44226004-44226048                            | NM_201372:64             | Ccdc84        | INSIDE                 | 1.649                                                        | 0.388                          | 1972.34            | 765.18             | 0.640                          | 1325.77            | 848.27             |
| A_68_P28187725 | chr11:120812339-120812383                         | NM_001038653:1980        | Slc16a3       | INSIDE                 | 1.647                                                        | 0.229                          | 2113.89            | 483.75             | 0.377                          | 1532.58            | 577.78             |
| A_68_P25020989 | chr7:29076252-29076296                            | NM_175033:-121           | BC089491      | PROMOTER               | 1.647                                                        | 0.216                          | 2033.38            | 439.83             | 0.356                          | 1466.96            | 522.67             |
| A_68_P27630976 | chr11:20232710-20232754                           | NM_018861:-16            | Slc1a4        | PROMOTER               | 1.646                                                        | 0.327                          | 1958.54            | 640.30             | 0.538                          | 1457.79            | 784.40             |
| A_68_P32339579 | chr4:136944180-136944224                          | ENSMUST00000078305:-7005 |               | PROMOTER               | 1.646                                                        | 0.193                          | 2341.37            | 452.28             | 0.318                          | 1685.96            | 536.12             |
| A_68_P32790793 | chrX:159198362-159198406                          | NM_009031:81             | Rbbp7         | INSIDE                 | 1.645                                                        | 2.460                          | 233.74             | 575.00             | 4.047                          | 231.53             | 937.09             |
| A_68_P31256956 | chr17:56705945-56705989                           | NM_001029979:18040       | Safb2         | INSIDE                 | 1.645                                                        | 1.951                          | 909.41             | 1774.22            | 3.210                          | 754.39             | 2421.77            |
| A_68_P24428220 | chr6:48547266-48547310                            | NM_001079901:3407        | Repin1        | INSIDE                 | 1.645                                                        | 1.685                          | 663.81             | 1118.38            | 2.771                          | 534.14             | 1480.00            |
| A_68_P21673353 | chr2:138082625-138082669                          | NM_001025431:327         | Btbd3         | INSIDE                 | 1.644                                                        | 0.264                          | 2671.76            | 705.92             | 0.434                          | 2204.93            | 957.51             |
| A_68_P25499767 | chr7:133435936-133435980                          | NM_145587:19826          | Sbk1          | INSIDE                 | 1.642                                                        | 2.270                          | 580.62             | 1318.11            | 3.729                          | 536.44             | 2000.20            |
| A_68_P21774735 | chr2:156846821-156846865                          | NM_001164663:58159       | 9830001H06Rik | INSIDE                 | 1.642                                                        | 1.603                          | 495.12             | 793.91             | 2.633                          | 417.25             | 1098.49            |
| A_68_P31841966 | chr18:76400802-76400846                           | NM_010754:-754           | Smad2         | PROMOTER               | 1.641                                                        | 0.240                          | 2882.94            | 691.34             | 0.393                          | 2107.21            | 829.06             |
| A_68_P23364325 | chr4:141034764-141034809                          | NM_019763:59726          | Spen          | INSIDE                 | 1.641                                                        | 2.009                          | 298.14             | 598.94             | 3.297                          | 270.41             | 891.44             |
| A_68_P26658578 | chr9:78023836-78023880                            | NM_019987:62814          | Ick           | DOWNSTREAM             | 1.638                                                        | 0.336                          | 1825.54            | 612.89             | 0.550                          | 1395.07            | 766.97             |
| A_68_P25025268 | chr7:29871232-29871276                            | NR_035489:-2541          | Mir1963       | PROMOTER               | 1.638                                                        | 1.764                          | 415.65             | 733.30             | 2.890                          | 357.18             | 1032.21            |
| A_68_P21102303 | chr2:30142233-30142277                            | NM_198304:302            | Nup188        | INSIDE                 | 1.638                                                        | 0.152                          | 3059.33            | 466.03             | 0.249                          | 2138.98            | 533.67             |
| A_68_P23280027 | chr4:126106647-126106691                          | NM_153402:118            | Eif2c3        | INSIDE                 | 1.637                                                        | 0.374                          | 1530.92            | 573.05             | 0.613                          | 1160.71            | 711.12             |
| A_68_P26344263 | chr9:20672999-20673043                            | NM_175687:-65            | A230050P20Rik | PROMOTER               | 1.636                                                        | 7.477                          | 836.66             | 6255.73            | 12.233                         | 690.61             | 8484.31            |
| A_68_P21070362 | chr2:25036916-25036960                            | NM_025980:661            | Nrarp         | INSIDE                 | 1.635                                                        | 0.183                          | 2638.15            | 482.61             | 0.299                          | 1731.34            | 517.99             |
| A_68_P30651947 | chr16:32333125-32333169                           | NM_177633:809            | Ubxn7         | INSIDE                 | 1.633                                                        | 2.079                          | 455.69             | 947.25             | 3.395                          | 349.78             | 1187.46            |
| A_68_P31260730 | chr17:57388800-57388844                           | NM_134125:-51            | Trip10        | DIVERGENT_PROMOTER     | 1.631                                                        | 0.256                          | 3650.49            | 934.72             | 0.418                          | 2504.21            | 1046.13            |
| A_68_P27287001 | chr10:80494270-80494314                           | NM_134135:2365           | Slc39a3       | INSIDE                 | 1.630                                                        | 1.767                          | 862.94             | 1525.04            | 2.881                          | 622.02             | 1792.32            |
| A_68_P24642400 | chr6:91929179-91929223                            | NM_172731:-7903          | Fgd5          | PROMOTER               | 1.629                                                        | 0.395                          | 2597.95            | 1026.01            | 0.643                          | 1718.17            | 1105.19            |
| A_68_P25957633 | chr8:74108592-74108640                            | NM_011977:15791          | Slc27a1       | INSIDE                 | 1.628                                                        | 1.543                          | 768.24             | 1185.18            | 2.512                          | 539.64             | 1355.69            |
| A_68_P21754953 | chr2:15326988-153270032                           | NM_001001986:205         | 8430427H17Rik | INSIDE                 | 1.627                                                        | 4.589                          | 2156.90            | 9898.03            | 7.466                          | 1736.38            | 12964.18           |
| A_68_P24424840 | chr6:47855086-47855130                            | NM_146175:27555          | Zfp282        | INSIDE                 | 1.625                                                        | 1.496                          | 923.18             | 1381.37            | 2.432                          | 720.93             | 1753.37            |
| A_68_P26018119 | chr8:86618743-86618787                            | NM_009055:28030          | Rfx1          | INSIDE                 | 1.624                                                        | 1.389                          | 979.05             | 1359.71            | 2.255                          | 697.14             | 1572.22            |
| A_68_P20715106 | chr1:153347232-153347276                          | NM_011277:699            | Rnf2          | INSIDE                 | 1.624                                                        | 0.175                          | 4372.86            | 764.02             | 0.284                          | 3016.28            | 855.76             |

| ProbeName      | Target position of probe on CpG island microarray | TargetID                 | GeneSymbol | CpG island Description | Ratio of relative methylation (TiO <sub>2</sub> -NP/Vehicle) | Sham group                     |                    |                    | TiO <sub>2</sub> -H group      |                    |                    |
|----------------|---------------------------------------------------|--------------------------|------------|------------------------|--------------------------------------------------------------|--------------------------------|--------------------|--------------------|--------------------------------|--------------------|--------------------|
|                |                                                   |                          |            |                        |                                                              | Relative methylation (Cy5/Cy3) | Cy3 signal (Input) | Cy5 signal (MeDIP) | Relative methylation (Cy5/Cy3) | Cy3 signal (Input) | Cy5 signal (MeDIP) |
| A_68_P31491179 | chr18:10706877-10706921                           | NM_134130:-204           | Abhd3      | PROMOTER               | 1.623                                                        | 0.207                          | 2949.55            | 611.31             | 0.336                          | 2040.67            | 686.49             |
| A_68_P24172758 | chr5:148081815-148081859                          | NM_008814:130            | Pdx1       | INSIDE                 | 1.623                                                        | 0.218                          | 2266.47            | 494.36             | 0.354                          | 1608.93            | 569.41             |
| A_68_P23611143 | chr5:37420486-37420530                            | ENSMUST00000165557:12377 |            | DOWNSTREAM             | 1.622                                                        | 0.277                          | 1634.49            | 452.43             | 0.449                          | 1241.90            | 557.60             |
| A_68_P26676070 | chr9:81757205-81757249                            | NM_175213:-124           | Mei4       | PROMOTER               | 1.621                                                        | 3.082                          | 1470.15            | 4531.51            | 4.995                          | 1183.85            | 5913.82            |
| A_68_P25958124 | chr8:74184428-74184472                            | NM_001029873:11206       | Unc13a     | INSIDE                 | 1.621                                                        | 0.164                          | 3754.13            | 614.72             | 0.265                          | 2588.49            | 687.20             |
| A_68_P21017270 | chr2:13496599-13496643                            | NM_011701:683            | Vim        | INSIDE                 | 1.621                                                        | 0.082                          | 6678.46            | 550.72             | 0.134                          | 4542.28            | 607.33             |
| A_68_P31779045 | chr18:65243748-65243792                           | NM_031881:60590          | Nedd4l     | INSIDE                 | 1.620                                                        | 1.872                          | 371.61             | 695.75             | 3.033                          | 328.71             | 996.84             |
| A_68_P30396225 | chr15:84511839-84511883                           | NM_146061:433            | Prr5       | INSIDE                 | 1.620                                                        | 0.312                          | 2530.29            | 789.78             | 0.506                          | 1745.30            | 882.49             |
| A_68_P30484946 | chr15:100111437-100111481                         | NM_183109:191            | Tmprss12   | INSIDE                 | 1.619                                                        | 1.739                          | 1151.96            | 2003.20            | 2.815                          | 938.91             | 2642.65            |
| A_68_P25031176 | chr7:31140849-31140896                            | NM_175478:6919           | Lrfn3      | INSIDE                 | 1.619                                                        | 1.958                          | 404.54             | 791.98             | 3.170                          | 318.58             | 1009.97            |
| A_68_P21326874 | chr2:72472122-72472166                            | ENSMUST00000120282:152   |            | INSIDE                 | 1.619                                                        | 1.997                          | 635.97             | 1270.33            | 3.233                          | 447.42             | 1446.62            |
| A_68_P21906146 | chr2:180511719-180511763                          | NM_080641:-135           | Bhlhe23    | PROMOTER               | 1.618                                                        | 0.381                          | 1734.71            | 661.43             | 0.617                          | 1407.63            | 868.39             |
| A_68_P21394211 | chr2:84555629-84555673                            | NM_144887:-329           | Zdhc5      | PROMOTER               | 1.618                                                        | 0.133                          | 4957.00            | 658.84             | 0.215                          | 3396.61            | 730.59             |
| A_68_P32238976 | chrX:7151221-7151265                              | NM_138605:4              | Ppp1r3f    | INSIDE                 | 1.617                                                        | 1.495                          | 674.16             | 1007.90            | 2.417                          | 789.03             | 1906.97            |
| A_68_P29049666 | chr13:54569805-54569849                           | NM_028597:375            | Thoc3      | INSIDE                 | 1.617                                                        | 2.235                          | 11703.62           | 26157.32           | 3.614                          | 6830.35            | 24686.83           |
| A_68_P28724520 | chr12:109154600-109154644                         | NM_001079883:87002       | Bcl11b     | INSIDE                 | 1.617                                                        | 2.480                          | 1098.32            | 2724.25            | 4.012                          | 947.29             | 3800.08            |
| A_68_P31554070 | chr18:23469238-23469282                           | X95227:535               |            | INSIDE                 | 1.616                                                        | 0.380                          | 1553.32            | 589.99             | 0.614                          | 1166.18            | 715.95             |
| A_68_P28058390 | chr11:98629362-98629406                           | NM_145434:7172           | Nr1d1      | INSIDE                 | 1.616                                                        | 1.621                          | 778.67             | 1262.07            | 2.619                          | 614.34             | 1609.16            |
| A_68_P21127262 | chr2:34226792-34226836                            | NM_016768:742            | Pbx3       | INSIDE                 | 1.616                                                        | 0.303                          | 1723.18            | 522.71             | 0.490                          | 1308.56            | 641.41             |
| A_68_P28137854 | chr11:112646538-112646582                         | NM_011448:3037           | Sox9       | INSIDE                 | 1.615                                                        | 0.200                          | 15378.05           | 3070.87            | 0.323                          | 9983.62            | 3220.41            |
| A_68_P27261658 | chr10:75837803-75837847                           | NM_008787:67833          | Pcnt       | INSIDE                 | 1.614                                                        | 2.954                          | 164.05             | 484.64             | 4.767                          | 218.99             | 1044.01            |
| A_68_P25958415 | chr8:74225497-74225541                            | NM_028189:181            | B3gnt3     | INSIDE                 | 1.614                                                        | 0.242                          | 2052.69            | 497.30             | 0.391                          | 1379.50            | 539.29             |
| A_68_P32364037 | chrX:45695522-45695566                            | NM_178782:1010           | Bcor1      | INSIDE                 | 1.612                                                        | 0.210                          | 2061.59            | 433.79             | 0.339                          | 2647.51            | 897.87             |
| A_68_P29226577 | chr13:93380980-93381024                           | NM_172588:-90            | Serinc5    | PROMOTER               | 1.611                                                        | 0.158                          | 7100.57            | 1119.19            | 0.254                          | 5051.02            | 1282.79            |
| A_68_P30284264 | chr15:64753856-64753901                           | NM_009623:-20            | Adcy8      | PROMOTER               | 1.610                                                        | 0.349                          | 3013.77            | 1051.94            | 0.562                          | 2141.26            | 1203.36            |
| A_68_P25950576 | chr8:72757876-72757920                            | NM_001168290:-226        | Sugp2      | PROMOTER               | 1.610                                                        | 0.309                          | 2012.33            | 621.99             | 0.498                          | 1348.88            | 671.26             |
| A_68_P23971467 | chr5:108795517-108795561                          | ENSMUST00000100944:-3338 |            | PROMOTER               | 1.610                                                        | 0.264                          | 2710.11            | 716.24             | 0.426                          | 1827.65            | 777.70             |
| A_68_P28577475 | chr12:81859600-81859644                           | NM_001008423:2080        | Gm1568     | INSIDE                 | 1.609                                                        | 1.836                          | 768.46             | 1410.83            | 2.953                          | 652.26             | 1926.39            |
| A_68_P29055231 | chr13:55574123-55574167                           | NM_001030296:8517        | Prr7       | INSIDE                 | 1.608                                                        | 0.364                          | 1763.37            | 641.56             | 0.585                          | 1317.49            | 770.58             |
| A_68_P28470051 | chr12:60162088-60162132                           | NM_030057:338            | Trappc6b   | INSIDE                 | 1.608                                                        | 0.221                          | 3539.41            | 780.78             | 0.355                          | 2721.52            | 965.22             |
| A_68_P23896968 | chr5:93371161-93371205                            | NM_001077596:44159       | Shroom3    | INSIDE                 | 1.608                                                        | 1.917                          | 1053.60            | 2019.89            | 3.082                          | 826.42             | 2546.97            |
| A_68_P30351141 | chr15:76741990-76742034                           | NM_001168276:13866       | Zfp647     | INSIDE                 | 1.607                                                        | 2.385                          | 350.58             | 836.06             | 3.831                          | 309.61             | 1186.20            |
| A_68_P30473862 | chr15:98087209-98087253                           | NM_027304:508            | H1fit      | INSIDE                 | 1.606                                                        | 1.620                          | 954.26             | 1546.11            | 2.602                          | 873.30             | 2272.54            |
| A_68_P21103419 | chr2:30325956-30326000                            | NM_030244:3741           | Ier5l      | DOWNSTREAM             | 1.605                                                        | 0.343                          | 2161.39            | 740.55             | 0.550                          | 1642.82            | 903.44             |
| A_68_P32488665 | chrX:78316348-78316392                            | NM_138751:388            | Tmem47     | INSIDE                 | 1.604                                                        | 0.254                          | 2353.73            | 597.05             | 0.407                          | 3251.49            | 1322.72            |
| A_68_P31162032 | chr17:36116207-36116251                           | NR_028516:-260           | Prr3       | PROMOTER               | 1.603                                                        | 4.207                          | 1691.40            | 7116.57            | 6.744                          | 1419.06            | 9570.31            |
| A_68_P30351142 | chr15:76742082-76742126                           | NM_001168276:13774       | Zfp647     | INSIDE                 | 1.603                                                        | 1.493                          | 752.04             | 1122.60            | 2.393                          | 600.17             | 1436.20            |
| A_68_P21585603 | chr2:122127484-122127528                          | NM_025777:2871           | Duoxa2     | INSIDE                 | 1.603                                                        | 0.421                          | 2088.59            | 879.01             | 0.675                          | 1524.50            | 1028.42            |
| A_68_P30422455 | chr15:88813114-88813158                           | NM_031260:-287           | Mov10l1    | DIVERGENT_PROMOTER     | 1.602                                                        | 1.486                          | 2470.29            | 3671.14            | 2.380                          | 1879.55            | 4473.90            |
| A_68_P27924771 | chr11:75007879-75007923                           | NM_177708:406            | Rtn4rl1    | INSIDE                 | 1.602                                                        | 0.271                          | 2789.24            | 755.49             | 0.434                          | 2280.03            | 989.42             |
| A_68_P21874752 | chr2:174154225-174154269                          | NM_001077510:-1343       | Gnas       | PROMOTER               | 1.602                                                        | 2.507                          | 808.27             | 2026.45            | 4.017                          | 672.22             | 2700.54            |
| A_68_P25827954 | chr8:46109471-46109515                            | NM_001081286:73931       | Fat1       | INSIDE                 | 1.601                                                        | 2.260                          | 335.56             | 758.44             | 3.619                          | 296.17             | 1071.77            |
| A_68_P21629541 | chr2:130223202-130223246                          | NM_019696:141            | Cpxm1      | INSIDE                 | 1.601                                                        | 0.280                          | 2046.86            | 573.02             | 0.448                          | 1504.46            | 674.27             |
| A_68_P26156363 | chr8:111864572-111864616                          | NR_002928:214            | Gm1943     | INSIDE                 | 1.599                                                        | 1.488                          | 582.11             | 866.47             | 2.380                          | 532.26             | 1266.95            |
| A_68_P26042148 | chr8:91151286-91151330                            | NM_027840:8719           | Smx20      | INSIDE                 | 1.599                                                        | 2.728                          | 217.07             | 592.28             | 4.363                          | 191.56             | 835.79             |
| A_68_P23283131 | chr4:126698502-126698546                          | NM_023603:-20            | Sfpq       | PROMOTER               | 1.599                                                        | 7.855                          | 272.36             | 2139.24            | 12.563                         | 196.30             | 2466.18            |
| A_68_P21843327 | chr2:168578173-168578217                          | NM_175303:14507          | Sall4      | INSIDE                 | 1.599                                                        | 1.529                          | 583.90             | 892.75             | 2.445                          | 471.65             | 1153.34            |
| A_68_P20293513 | chr1:64663621-64663665                            | NM_025964:100            | Mettl21a   | INSIDE                 | 1.599                                                        | 4.913                          | 1637.15            | 8044.00            | 7.858                          | 1502.99            | 11811.15           |
| A_68_P31335035 | chr17:71901365-71901409                           | NM_001142631:-14         | Spdy       | PROMOTER               | 1.598                                                        | 1.774                          | 425.98             | 755.53             | 2.835                          | 324.11             | 918.71             |
| A_68_P31252967 | chr17:56095790-56095834                           | NM_015766:3767           | Ebi3       | INSIDE                 | 1.598                                                        | 1.688                          | 665.34             | 1122.94            | 2.697                          | 484.33             | 1306.29            |
| A_68_P30778319 | chr16:55905763-55905807                           | NM_028815:29177          | Cep97      | INSIDE                 | 1.598                                                        | 1.563                          | 990.59             | 1548.31            | 2.498                          | 782.50             | 1954.51            |
| A_68_P28159867 | chr11:116395295-116395339                         | NM_011451:-737           | Spkl1      | PROMOTER               | 1.598                                                        | 0.314                          | 2168.91            | 680.12             | 0.501                          | 1488.89            | 745.85             |
| A_68_P26216539 | chr8:122394248-122394292                          | NM_146219:8066           | Klhl36     | INSIDE                 | 1.596                                                        | 1.599                          | 505.80             | 808.68             | 2.552                          | 435.56             | 1111.54            |
| A_68_P24631555 | chr6:90259775-90259819                            | NM_027928:15383          | Chst5      | INSIDE                 | 1.596                                                        | 1.739                          | 623.35             | 1084.11            | 2.775                          | 545.54             | 1513.97            |
| A_68_P22080609 | chr3:40439835-40439879                            | NM_175515:168            | Intu       | INSIDE                 | 1.596                                                        | 1.973                          | 428.44             | 845.19             | 3.149                          | 386.19             | 1216.25            |
| A_68_P31442574 | chr17:91487821-91487865                           | NM_020252:4300           | Nrxn1      | INSIDE                 | 1.594                                                        | 2.062                          | 468.22             | 965.36             | 3.286                          | 452.02             | 1485.32            |
| A_68_P27349651 | chr10:92185236-92185280                           | NM_008682:-95            | Nedd1      | PROMOTER               | 1.594                                                        | 3.868                          | 1026.85            | 3972.04            | 6.166                          | 844.64             | 5207.63            |
| A_68_P26346083 | chr9:21038393-21038437                            | NM_001110305:5362        | Keap1      | INSIDE                 | 1.594                                                        | 1.654                          | 1336.36            | 2210.62            | 2.636                          | 945.49             | 2492.56            |
| A_68_P24120341 | chr5:136751221-136751265                          | NM_198602:292033         | Cux1       | INSIDE                 | 1.594                                                        | 2.390                          | 540.71             | 1292.55            | 3.811                          | 381.48             | 1453.75            |
| A_68_P30467109 | chr15:96884897-96884941                           | NM_027052:1469           | Slc38a4    | INSIDE                 | 1.592                                                        | 1.712                          | 895.77             | 1533.73            | 2.725                          | 748.90             | 2040.91            |
| A_68_P26258349 | chr8:129107965-129108009                          | NM_001164598:9350        | Ifi2bp2    | DOWNSTREAM             | 1.591                                                        | 2.285                          | 885.07             | 2022.28            | 3.636                          | 712.81             | 2591.75            |
| A_68_P32182254 | chr19:53465262-53465306                           | NM_172429:-221           | Smndc1     | PROMOTER               | 1.590                                                        | 0.206                          | 4922.77            | 1013.14            | 0.327                          | 3156.19            | 1032.49            |
| A_68_P26236516 | chr8:125394674-125394718                          | NM_007662:22423          | Cdh15      | DOWNSTREAM             | 1.590                                                        | 2.976                          | 1299.16            | 3866.90            | 4.732                          | 1076.60            | 5094.76            |
| A_68_P23896967 | chr5:93371085-93371129                            | NM_001077596:44083       | Shroom3    | INSIDE                 | 1.590                                                        | 1.563                          | 696.42             | 1088.74            | 2.485                          | 602.34             | 1496.86            |
| A_68_P24449293 | chr6:52183630-52183674                            | NM_008263:1286           | Hoxa10     | INSIDE                 | 1.588                                                        | 0.293                          | 2830.25            | 830.02             | 0.466                          | 1972.81            | 918.58             |

| ProbeName      | Target position of probe on CpG island microarray | TargetID                | GeneSymbol    | CpG island Description | Ratio of relative methylation (TiO <sub>2</sub> -NP/Vehicle) | Sham group                     |                    |                    | TiO <sub>2</sub> -H group      |                    |                    |
|----------------|---------------------------------------------------|-------------------------|---------------|------------------------|--------------------------------------------------------------|--------------------------------|--------------------|--------------------|--------------------------------|--------------------|--------------------|
|                |                                                   |                         |               |                        |                                                              | Relative methylation (Cy5/Cy3) | Cy3 signal (Input) | Cy5 signal (MeDIP) | Relative methylation (Cy5/Cy3) | Cy3 signal (Input) | Cy5 signal (MeDIP) |
| A_68_P32071922 | chr19:32831644-32831688                           | NM_008960:400           | Pten          | PROMOTER               | 1.586                                                        | 2.778                          | 1292.51            | 3590.86            | 4.406                          | 1141.86            | 5031.26            |
| A_68_P27286342 | chr10:80380790-80380834                           | NM_010722:178           | Lmnb2         | INSIDE                 | 1.586                                                        | 0.325                          | 1581.34            | 513.81             | 0.515                          | 1088.62            | 561.15             |
| A_68_P23295049 | chr4:128798702-128798746                          | NM_010471:-189          | Hpc4          | PROMOTER               | 1.586                                                        | 0.278                          | 2390.01            | 665.10             | 0.441                          | 1676.39            | 739.71             |
| A_68_P30459963 | chr15:95621546-95621590                           | NM_175344:295           | Ano6          | INSIDE                 | 1.584                                                        | 0.231                          | 2539.28            | 587.51             | 0.367                          | 1826.40            | 669.48             |
| A_68_P30346606 | chr15:76010797-76010841                           | NM_201394:15322         | Plec          | INSIDE                 | 1.584                                                        | 2.227                          | 522.79             | 1164.31            | 3.529                          | 471.45             | 1663.62            |
| A_68_P29717288 | chr14:73784719-73784763                           | NM_008410:338           | Itm2b         | INSIDE                 | 1.584                                                        | 3.100                          | 6962.05            | 21584.94           | 4.910                          | 4986.58            | 24483.19           |
| A_68_P26540099 | chr9:56924722-56924766                            | NM_001110350:562        | Sin3a         | INSIDE                 | 1.584                                                        | 0.287                          | 1708.00            | 489.86             | 0.454                          | 1323.87            | 601.34             |
| A_68_P23325564 | chr4:134480330-134480374                          | NM_023665:813           | D4Wsu53c      | INSIDE                 | 1.584                                                        | 0.244                          | 3057.39            | 744.91             | 0.386                          | 1836.84            | 708.77             |
| A_68_P21565612 | chr2:118528731-118528775                          | NM_001081971:947        | Gml1337       | INSIDE                 | 1.584                                                        | 0.199                          | 4636.43            | 923.64             | 0.316                          | 2941.44            | 928.25             |
| A_68_P20146386 | chr1:36160613-36160657                            | NM_015818:35390         | Hs6st1        | INSIDE                 | 1.584                                                        | 1.853                          | 925.69             | 1715.49            | 2.936                          | 730.38             | 2144.55            |
| A_68_P32149066 | chr19:47388501-47388545                           | NM_001164717:150379     | Sh3pxd2a      | INSIDE                 | 1.583                                                        | 0.333                          | 2750.14            | 915.69             | 0.527                          | 1718.01            | 905.35             |
| A_68_P20319169 | chr1:69423807-69423851                            |                         |               | Unknown                | 1.583                                                        | 2.431                          | 609.74             | 1482.57            | 3.850                          | 518.55             | 1996.22            |
| A_68_P30560720 | chr16:14159038-14159083                           | NM_001081154:307        | 4921513D23Rik | INSIDE                 | 1.582                                                        | 0.244                          | 2275.29            | 554.47             | 0.386                          | 1666.31            | 642.52             |
| A_68_P24120337 | chr5:136750787-136750831                          | NM_198602:292467        | Cux1          | INSIDE                 | 1.580                                                        | 2.240                          | 334.43             | 749.01             | 3.538                          | 319.82             | 1131.52            |
| A_68_P20405966 | chr1:84835679-84835723                            | NM_133975:179           | Trip12        | INSIDE                 | 1.580                                                        | 0.338                          | 2282.17            | 772.45             | 0.535                          | 1822.84            | 974.98             |
| A_68_P28056597 | chr11:98319612-98319657                           | NM_010346:11487         | Grb7          | DOWNSTREAM             | 1.578                                                        | 0.138                          | 3883.85            | 535.77             | 0.218                          | 2521.03            | 548.76             |
| A_68_P28607942 | chr12:87423668-87423712                           | NM_001199843:180        | 1700019E19Rik | INSIDE                 | 1.577                                                        | 0.227                          | 2092.79            | 474.48             | 0.358                          | 1592.66            | 569.46             |
| A_68_P29241524 | chr13:96374376-96374423                           | NM_010169:13989         | F2r           | INSIDE                 | 1.575                                                        | 1.802                          | 361.54             | 651.63             | 2.839                          | 278.87             | 791.75             |
| A_68_P27947945 | chr11:79068066-79068110                           | NM_019653:109           | Wsb1          | INSIDE                 | 1.574                                                        | 0.314                          | 1771.06            | 556.97             | 0.495                          | 1263.90            | 625.78             |
| A_68_P25276874 | chr7:89484048-89484092                            | NM_001190374:-133       | Adamts13      | PROMOTER               | 1.574                                                        | 18.961                         | 862.19             | 16348.22           | 29.848                         | 879.16             | 26241.57           |
| A_68_P24159376 | chr5:144861468-144861512                          | NM_001081109:186        | Lmtk2         | INSIDE                 | 1.574                                                        | 0.403                          | 1643.20            | 661.93             | 0.634                          | 1281.72            | 812.68             |
| A_68_P23981088 | chr5:111082625-111082669                          | NM_027156:177           | Ddx51         | INSIDE                 | 1.574                                                        | 0.330                          | 2106.83            | 696.10             | 0.520                          | 1562.17            | 812.51             |
| A_68_P22402364 | chr3:106350168-106350212                          | NM_133869:489           | Cept1         | INSIDE                 | 1.572                                                        | 0.222                          | 2445.83            | 542.46             | 0.349                          | 1738.70            | 606.10             |
| A_68_P28989506 | chr13:43399105-43399149                           | NM_001033399:415        | Gfod1         | INSIDE                 | 1.571                                                        | 2.029                          | 435.09             | 882.67             | 3.186                          | 346.76             | 1104.88            |
| A_68_P28731504 | chr12:110272212-110272256                         | NM_001163175:34193      | Begain        | INSIDE                 | 1.571                                                        | 2.918                          | 478.65             | 1396.53            | 4.583                          | 373.70             | 1712.51            |
| A_68_P26949007 | chr10:12810795-12810839                           | NM_009538:223           | Plagl1        | INSIDE                 | 1.571                                                        | 1.604                          | 502.13             | 805.41             | 2.520                          | 473.66             | 1193.50            |
| A_68_P23441761 | chr4:155367293-155367337                          | NM_011341:292           | Sdf4          | INSIDE                 | 1.571                                                        | 0.321                          | 1513.03            | 485.85             | 0.504                          | 1152.48            | 581.34             |
| A_68_P23968414 | chr5:108150872-108150916                          | NM_010278:2469          | Gfi1          | INSIDE                 | 1.570                                                        | 1.690                          | 810.46             | 1369.39            | 2.653                          | 672.04             | 1783.15            |
| A_68_P21576978 | chr2:120557105-120557149                          | NM_026891:127           | Cdan1         | INSIDE                 | 1.570                                                        | 0.285                          | 3303.82            | 940.94             | 0.447                          | 2692.91            | 1204.22            |
| A_68_P29223483 | chr13:93125415-93125459                           | NM_010829:478           | Msh3          | PROMOTER               | 1.569                                                        | 0.239                          | 1971.36            | 470.53             | 0.375                          | 1596.63            | 597.95             |
| A_68_P30547090 | chr16:11254627-11254671                           | NR_035466:-110          | Mir1945       | PROMOTER               | 1.567                                                        | 0.316                          | 2248.78            | 711.56             | 0.496                          | 1709.84            | 847.57             |
| A_68_P25173479 | chr7:70902673-70902717                            | NM_130880:313037        | Otd7a         | INSIDE                 | 1.567                                                        | 0.327                          | 1352.09            | 442.30             | 0.513                          | 1064.27            | 536.41             |
| A_68_P24863577 | chr6:134742556-134742600                          | NM_001048054:68         | Dusp16        | INSIDE                 | 1.567                                                        | 0.223                          | 2441.07            | 544.37             | 0.350                          | 1732.81            | 605.64             |
| A_68_P28741418 | chr12:112215432-112215476                         | NM_175207:1777          | Ankrd9        | INSIDE                 | 1.565                                                        | 2.047                          | 1357.37            | 2778.67            | 3.204                          | 1039.98            | 3331.74            |
| A_68_P24973913 | chr7:13556719-13556763                            | NM_178732:5528          | Zfp324        | INSIDE                 | 1.565                                                        | 1.604                          | 533.79             | 856.25             | 2.511                          | 400.72             | 1006.01            |
| A_68_P21393860 | chr2:84499188-84499232                            | NM_001145100:-25        | Gml3718       | DIVERGENT_PROMOTER     | 1.565                                                        | 1.819                          | 519.35             | 944.47             | 2.846                          | 426.74             | 1214.56            |
| A_68_P32603686 | chrX:109714974-109715018                          | NM_177747:862           | Zfp711        | INSIDE                 | 1.564                                                        | 1.966                          | 220.76             | 433.99             | 3.074                          | 313.10             | 962.39             |
| A_68_P25099052 | chr7:53682950-53683004                            | NM_001112739:31110      | Kenc1         | INSIDE                 | 1.564                                                        | 1.650                          | 407.92             | 672.90             | 2.581                          | 344.82             | 889.84             |
| A_68_P26258430 | chr8:129118076-129118120                          | NM_001164598:-762       | Irf2bp2       | PROMOTER               | 1.563                                                        | 0.396                          | 2117.82            | 838.03             | 0.619                          | 1574.73            | 974.21             |
| A_68_P21585602 | chr2:122127398-122127442                          | NM_025777:2785          | Duoxa2        | INSIDE                 | 1.563                                                        | 0.114                          | 4204.83            | 479.12             | 0.178                          | 2958.28            | 526.81             |
| A_68_P31922425 | chr19:4305540-4305585                             | NM_130863:393           | Adrbk1        | INSIDE                 | 1.562                                                        | 0.418                          | 2712.76            | 1132.82            | 0.652                          | 2083.86            | 1359.66            |
| A_68_P26568894 | chr9:61969694-61969738                            | mmu-mir-5133:685        |               | DOWNSTREAM             | 1.562                                                        | 0.211                          | 4224.32            | 889.81             | 0.329                          | 3162.54            | 1040.44            |
| A_68_P23317853 | chr4:133042110-133042154                          | NM_175307:6085          | Fam46b        | INSIDE                 | 1.562                                                        | 1.674                          | 434.02             | 726.59             | 2.615                          | 367.20             | 960.25             |
| A_68_P30351140 | chr15:76741911-76741955                           | NM_001168276:13946      | Zfp647        | INSIDE                 | 1.561                                                        | 2.963                          | 993.98             | 2945.01            | 4.626                          | 782.11             | 3618.19            |
| A_68_P29047303 | chr13:54167121-54167165                           | NM_027324:-71           | Sfxn1         | PROMOTER               | 1.561                                                        | 2.052                          | 1709.35            | 3506.97            | 3.202                          | 1465.24            | 4691.95            |
| A_68_P28159934 | chr11:116403055-116403099                         | NM_173755:39685         | Ube2o         | INSIDE                 | 1.561                                                        | 3.072                          | 1274.06            | 3913.69            | 4.794                          | 978.30             | 4690.02            |
| A_68_P23366443 | chr4:141430949-141430993                          | NM_025994:-135          | Ehd2          | PROMOTER               | 1.559                                                        | 2.287                          | 630.10             | 1441.25            | 3.566                          | 498.78             | 1778.50            |
| A_68_P25677778 | chr8:14962588-14962634                            | NM_001037736:50894      | Arhgef10      | INSIDE                 | 1.558                                                        | 1.769                          | 895.76             | 1584.48            | 2.755                          | 660.31             | 1819.28            |
| A_68_P29648696 | chr14:61791453-61791497                           | NM_172809:34181         | Sacs          | INSIDE                 | 1.557                                                        | 1.992                          | 836.79             | 1666.59            | 3.101                          | 725.41             | 2249.71            |
| A_68_P27286999 | chr10:80494095-80494139                           | NM_134135:2541          | Slc39a3       | INSIDE                 | 1.555                                                        | 2.055                          | 930.54             | 1912.41            | 3.196                          | 754.80             | 2412.12            |
| A_68_P24118629 | chr5:136410508-136410552                          | NM_018871:-19           | Ywhag         | PROMOTER               | 1.555                                                        | 1.573                          | 1243.73            | 1956.40            | 2.446                          | 1088.59            | 2662.76            |
| A_68_P25094658 | chr7:52968623-52968667                            | NM_020011:1933          | Sphk2         | INSIDE                 | 1.554                                                        | 1.691                          | 643.79             | 1088.66            | 2.627                          | 518.03             | 1361.13            |
| A_68_P25093408 | chr7:52744206-52744250                            | NM_027903:-62           | Dhdh          | PROMOTER               | 1.554                                                        | 0.316                          | 2097.87            | 662.37             | 0.491                          | 1541.75            | 756.48             |
| A_68_P25092433 | chr7:52582778-52582822                            | NM_175130:6350          | Trpm4         | INSIDE                 | 1.554                                                        | 2.236                          | 1288.18            | 2880.47            | 3.474                          | 996.52             | 3462.35            |
| A_68_P21652098 | chr2:134469794-134469838                          | NM_029148:41            | Tmx4          | INSIDE                 | 1.554                                                        | 0.379                          | 1662.61            | 629.68             | 0.588                          | 1179.99            | 694.37             |
| A_68_P21149699 | chr2:38527835-38527879                            | ENSMUST00000152645:-200 |               | PROMOTER               | 1.554                                                        | 1.507                          | 924.70             | 1393.76            | 2.342                          | 754.59             | 1767.01            |
| A_68_P26065128 | chr8:94880726-94880770                            | NR_033641:-729          | 4933436C20Rik | DIVERGENT_PROMOTER     | 1.553                                                        | 0.351                          | 2445.88            | 857.95             | 0.545                          | 1753.69            | 955.28             |
| A_68_P25614032 | chr8:3451969-3452013                              | NM_133962:58983         | Arhgef18      | INSIDE                 | 1.553                                                        | 2.272                          | 821.70             | 1866.53            | 3.528                          | 687.55             | 2425.37            |
| A_68_P22210462 | chr3:67319224-67319268                            | NM_001164763:199        | Rarres1       | INSIDE                 | 1.553                                                        | 1.481                          | 1178.17            | 1744.78            | 2.300                          | 947.12             | 2178.81            |
| A_68_P23279071 | chr4:125932970-125933014                          | NM_001145970:571        | Mtap7d1       | INSIDE                 | 1.552                                                        | 0.154                          | 3150.35            | 486.29             | 0.240                          | 2341.62            | 560.84             |
| A_68_P22349550 | chr3:96279054-96279098                            | AK136676:11082          |               | DOWNSTREAM             | 1.552                                                        | 1.458                          | 2619.71            | 3819.02            | 2.263                          | 2034.29            | 4603.85            |
| A_68_P28736910 | chr12:111426306-111426350                         | AK044800:543            |               | INSIDE                 | 1.551                                                        | 11.585                         | 2520.93            | 29205.16           | 17.965                         | 2360.68            | 42408.73           |
| A_68_P26153173 | chr8:111324170-111324214                          | NM_007496:85649         | Zfx3          | INSIDE                 | 1.551                                                        | 2.009                          | 632.58             | 1270.69            | 3.116                          | 445.30             | 1387.73            |
| A_68_P25048197 | chr7:35988690-35988734                            | NM_001024707:11652      | Lrp3          | INSIDE                 | 1.551                                                        | 1.372                          | 1452.98            | 1992.91            | 2.127                          | 1076.89            | 2290.20            |
| A_68_P22584284 | chr3:141128445-141128489                          | NM_009472:-61           | Unc5c         | PROMOTER               | 1.551                                                        | 0.255                          | 2975.85            | 758.83             | 0.395                          | 1961.62            | 775.69             |

| ProbeName       | Target position of probe on CpG island microarray | TargetID                | GeneSymbol    | CpG island Description | Ratio of relative methylation (TiO <sub>2</sub> -NP/Vehicle) | Sham group                     |                    |                    | TiO <sub>2</sub> -H group      |                    |                    |
|-----------------|---------------------------------------------------|-------------------------|---------------|------------------------|--------------------------------------------------------------|--------------------------------|--------------------|--------------------|--------------------------------|--------------------|--------------------|
|                 |                                                   |                         |               |                        |                                                              | Relative methylation (Cy5/Cy3) | Cy3 signal (Input) | Cy5 signal (MeDIP) | Relative methylation (Cy5/Cy3) | Cy3 signal (Input) | Cy5 signal (MeDIP) |
| A_68_P21325833  | chr2:72314668-72314712                            | NM_025866:415           | Cdca7         | INSIDE                 | 1.551                                                        | 0.290                          | 1575.87            | 457.67             | 0.451                          | 1228.83            | 553.63             |
| A_68_P24513205  | chr6:65622381-65622425                            | NM_172399:798           | A930038C07Rik | INSIDE                 | 1.550                                                        | 0.118                          | 4061.98            | 481.18             | 0.184                          | 2778.12            | 510.25             |
| A_68_P21635426  | chr2:131346286-131346330                          | NM_001177833:28711      | Smox          | INSIDE                 | 1.550                                                        | 1.698                          | 659.66             | 1120.13            | 2.632                          | 448.43             | 1180.16            |
| A_68_P24428350  | chr6:48570111-48570155                            | NM_173429:6954          | Zfp775        | INSIDE                 | 1.549                                                        | 1.999                          | 1323.59            | 2646.24            | 3.098                          | 983.15             | 3045.57            |
| A_68_P20002774  | chr1:3662119-3662163                              | NM_001011874:-561       | Xkr4          | PROMOTER               | 1.549                                                        | 0.370                          | 2511.88            | 930.49             | 0.574                          | 1903.13            | 1091.73            |
| A_68_P32741378  | chrX:146801546-146801590                          | ENSMUST00000117777:891  |               | DOWNSTREAM             | 1.548                                                        | 2.247                          | 478.43             | 1075.27            | 3.478                          | 681.33             | 2369.81            |
| A_68_P32364035  | chrX:45695205-45695249                            | NM_178782:692           | Bcor1l        | INSIDE                 | 1.548                                                        | 3.670                          | 5012.89            | 18396.86           | 5.679                          | 6406.74            | 36386.35           |
| A_68_P27270906  | chr10:77365060-77365104                           | NM_145152:199           | Lrrc3         | INSIDE                 | 1.548                                                        | 3.432                          | 3586.26            | 12307.29           | 5.313                          | 2736.76            | 14541.29           |
| A_68_P25355269  | chr7:105509376-105509420                          | NM_001024619:400        | Tsku          | INSIDE                 | 1.548                                                        | 0.145                          | 4000.65            | 581.14             | 0.225                          | 2564.41            | 576.78             |
| A_68_P21641569  | chr2:132512720-132512764                          | NM_028637:-3276         |               | PROMOTER               | 1.548                                                        | 0.350                          | 1952.87            | 683.47             | 0.542                          | 1693.38            | 917.50             |
| A_68_P22336399  | chr3:93248419-93248463                            | NM_001163098:2189       | Tchh          | INSIDE                 | 1.547                                                        | 49.363                         | 1152.98            | 56914.80           | 76.343                         | 1409.58            | 107611.20          |
| A_68_P28096909  | chr11:105451661-105451705                         | NM_181071:383           | Tanc2         | INSIDE                 | 1.546                                                        | 0.378                          | 1891.76            | 715.96             | 0.585                          | 1507.47            | 882.01             |
| A_68_P25641011  | chr8:9207733-9207777                              | NM_173446:563269        | Fam155a       | INSIDE                 | 1.545                                                        | 2.130                          | 368.77             | 785.31             | 3.289                          | 363.86             | 1196.84            |
| A_68_P30568280  | chr16:16146642-16146686                           | NM_146068:262           | 231008H04Rik  | INSIDE                 | 1.544                                                        | 2.496                          | 1629.22            | 4067.01            | 3.854                          | 1384.77            | 5337.16            |
| A_68_P32462526  | chrX:70667546-70667590                            | NM_009566:11127         | Zfp92         | INSIDE                 | 1.543                                                        | 1.420                          | 939.56             | 1333.78            | 2.190                          | 1156.79            | 2533.90            |
| A_68_P30380080  | chr15:81690283-81690327                           | NM_020507:-1548         | Tob2          | PROMOTER               | 1.543                                                        | 0.302                          | 2348.56            | 709.08             | 0.466                          | 1709.12            | 796.35             |
| A_68_P28435270  | chr12:53604591-53604635                           | AK131622:-346           |               | PROMOTER               | 1.543                                                        | 0.344                          | 4896.20            | 1682.09            | 0.530                          | 3462.18            | 1835.74            |
| A_68_P25613343  | chr8:3279377-3279421                              | NM_010568:219           | Insr          | INSIDE                 | 1.543                                                        | 0.255                          | 1912.01            | 487.08             | 0.393                          | 1470.64            | 578.08             |
| A_68_P23278936  | chr4:125911491-125911535                          | NM_001145970:22051      | Mtap7d1       | INSIDE                 | 1.543                                                        | 1.770                          | 605.01             | 1070.80            | 2.731                          | 472.27             | 1289.92            |
| A_68_P21843350  | chr2:168581447-168581491                          | NM_175303:11233         | Sall4         | INSIDE                 | 1.543                                                        | 1.449                          | 1210.08            | 1753.35            | 2.235                          | 914.42             | 2043.79            |
| A_68_P26880499  | chr9:120842203-120842247                          | NM_007614:-293          | Ctnnb1        | PROMOTER               | 1.542                                                        | 3.009                          | 2567.49            | 7725.82            | 4.640                          | 1727.24            | 8014.87            |
| A_68_P25508016  | chr7:135047821-135047865                          | NM_009739:256           | Bckdk         | INSIDE                 | 1.542                                                        | 0.364                          | 1335.83            | 485.95             | 0.561                          | 1061.10            | 595.23             |
| A_68_P30512950  | chr16:4964504-4964548                             | NM_028301:-196          | Anks3         | PROMOTER               | 1.541                                                        | 0.136                          | 3798.00            | 515.96             | 0.209                          | 2488.68            | 521.14             |
| A_68_P29644189  | chr14:60997251-60997301                           | NM_001164705:154        | Fam123a       | INSIDE                 | 1.541                                                        | 1.684                          | 536.98             | 904.21             | 2.595                          | 444.10             | 1152.31            |
| A_68_P27893905  | chr11:69049315-69049359                           | NM_008192:1188          | Gucy2c        | INSIDE                 | 1.541                                                        | 0.419                          | 2068.04            | 866.60             | 0.646                          | 1463.12            | 944.98             |
| A_68_P29613441  | chr14:55260479-55260523                           | NM_199470:-299          | Cdh24         | PROMOTER               | 1.539                                                        | 0.216                          | 3125.93            | 676.17             | 0.333                          | 2189.69            | 729.00             |
| A_68_P29109187  | chr13:67653829-67653873                           | NM_001035231:238        | Zfp748        | INSIDE                 | 1.538                                                        | 0.304                          | 1694.03            | 514.77             | 0.467                          | 1325.27            | 619.47             |
| A_68_P26766898  | chr9:99847864-99847908                            | ENSMUST00000104307:3759 |               | DOWNSTREAM             | 1.538                                                        | 1.878                          | 457.53             | 859.36             | 2.888                          | 421.24             | 1216.62            |
| A_68_P26350330  | chr9:21875518-21875562                            | NM_177318:249           | Zfp653        | INSIDE                 | 1.538                                                        | 0.384                          | 1654.20            | 635.45             | 0.591                          | 1180.45            | 697.20             |
| A_68_P25505623  | chr7:134587980-134588024                          | NM_175163:4670          | Zfp689        | INSIDE                 | 1.538                                                        | 5.898                          | 1196.95            | 7060.06            | 9.071                          | 1019.62            | 9248.95            |
| A_68_P332126393 | chr19:43502105-43502149                           |                         |               | Unknown                | 1.537                                                        | 2.290                          | 651.63             | 1492.49            | 3.520                          | 554.64             | 1952.26            |
| A_68_P23364326  | chr4:141034893-141034937                          | NM_019763:59598         | Spen          | INSIDE                 | 1.537                                                        | 1.574                          | 1020.25            | 1605.88            | 2.419                          | 800.35             | 1935.71            |
| A_68_P32775151  | chrX:155970887-155970931                          | NM_001033472:309        | A830080D01Rik | INSIDE                 | 1.536                                                        | 0.258                          | 1739.12            | 449.18             | 0.397                          | 2453.34            | 973.31             |
| A_68_P27356011  | chr10:93308901-93308948                           | NM_183199:14625         | Usp44         | INSIDE                 | 1.536                                                        | 2.412                          | 499.45             | 1204.85            | 3.704                          | 426.66             | 1580.55            |
| A_68_P21750311  | chr2:152460303-152460347                          | NM_009047:7581          | Rem1          | INSIDE                 | 1.536                                                        | 1.814                          | 1543.47            | 2799.99            | 2.787                          | 1315.22            | 3665.33            |
| A_68_P21840230  | chr2:168056944-168056988                          | NM_001160330:845        | Mocs3         | INSIDE                 | 1.535                                                        | 1.895                          | 487.01             | 922.94             | 2.910                          | 414.82             | 1207.07            |
| A_68_P21741660  | chr2:150730004-150730048                          | NM_024465:441           | Abld12        | INSIDE                 | 1.535                                                        | 0.142                          | 3194.54            | 454.68             | 0.218                          | 2540.11            | 554.83             |
| A_68_P27765091  | chr11:45758223-45758267                           | NM_028185:193           | Lsm11         | INSIDE                 | 1.534                                                        | 0.288                          | 2141.80            | 616.33             | 0.441                          | 1630.18            | 719.40             |
| A_68_P24946537  | chr7:3596654-3596698                              | NM_146176:-194          | Cnot3         | PROMOTER               | 1.534                                                        | 0.208                          | 3351.90            | 698.25             | 0.319                          | 2377.64            | 759.59             |
| A_68_P32226223  | chr19:60656220-60656264                           | NM_001172096:684        | 2700078E11Rik | INSIDE                 | 1.533                                                        | 0.220                          | 2860.62            | 630.53             | 0.338                          | 2091.20            | 706.46             |
| A_68_P29616218  | chr14:55710458-55710502                           | NM_001039198:405        | Zfx2          | INSIDE                 | 1.533                                                        | 0.389                          | 2644.87            | 1028.06            | 0.596                          | 2164.12            | 1289.75            |
| A_68_P21774854  | chr2:156865842-156865886                          | NM_001164663:39137      | 9830001H06Rik | INSIDE                 | 1.533                                                        | 1.558                          | 521.91             | 812.91             | 2.388                          | 432.79             | 1033.39            |
| A_68_P31125955  | chr17:29235539-29235583                           | NM_007669:4844          | Cdkn1a        | INSIDE                 | 1.531                                                        | 1.882                          | 670.31             | 1261.45            | 2.880                          | 550.86             | 1586.62            |
| A_68_P29002205  | chr13:45602874-45602918                           | NM_025508:59            | Gmpr          | INSIDE                 | 1.531                                                        | 0.356                          | 1557.92            | 554.04             | 0.545                          | 1301.95            | 708.93             |
| A_68_P28961844  | chr13:38727138-38727182                           | NM_139063:-182          | Muted         | PROMOTER               | 1.531                                                        | 1.475                          | 950.24             | 1401.85            | 2.259                          | 748.62             | 1690.97            |
| A_68_P25981542  | chr8:79709972-79710016                            | NM_001083906:283588     | Nr3c2         | INSIDE                 | 1.531                                                        | 1.782                          | 349.27             | 622.44             | 2.729                          | 324.79             | 886.38             |
| A_68_P27922355  | chr11:74584384-74584428                           | NM_026197:42            | Mettl16       | INSIDE                 | 1.530                                                        | 0.178                          | 2736.63            | 487.93             | 0.273                          | 2018.83            | 550.68             |
| A_68_P25394537  | chr7:112959576-112959620                          | NM_025301:3             | Mrp17         | INSIDE                 | 1.529                                                        | 2.362                          | 2548.18            | 6019.48            | 3.613                          | 2008.51            | 7256.28            |
| A_68_P23609440  | chr5:37139337-37139381                            | NM_133724:560           | Cno           | INSIDE                 | 1.529                                                        | 0.242                          | 2046.23            | 495.77             | 0.371                          | 1537.15            | 569.55             |
| A_68_P27280641  | chr10:79516441-79516485                           | NM_001037741:-319       | Gpx4          | PROMOTER               | 1.528                                                        | 0.176                          | 2834.81            | 497.87             | 0.268                          | 1951.86            | 523.91             |
| A_68_P24983897  | chr7:17492695-17492739                            | NM_008967:878           | Ptgir         | INSIDE                 | 1.528                                                        | 1.588                          | 600.61             | 953.87             | 2.426                          | 465.57             | 1129.69            |
| A_68_P24428347  | chr6:48569751-48569795                            | NM_173429:6594          | Zfp775        | INSIDE                 | 1.528                                                        | 1.728                          | 709.09             | 1225.03            | 2.640                          | 595.89             | 1573.25            |
| A_68_P30778928  | chr16:56029876-56029920                           | NM_001024622:-68        | Pcpn          | PROMOTER               | 1.527                                                        | 0.256                          | 1773.65            | 454.80             | 0.392                          | 1345.79            | 527.11             |
| A_68_P26554373  | chr9:59464987-59465031                            | NM_001205239:-82        | Parp6         | PROMOTER               | 1.526                                                        | 3.340                          | 845.14             | 2822.99            | 5.099                          | 648.15             | 3304.86            |
| A_68_P24061483  | chr5:124928214-124928258                          | NM_030259:8             | Rilpl2        | INSIDE                 | 1.526                                                        | 0.363                          | 1350.56            | 490.35             | 0.554                          | 1065.78            | 590.43             |
| A_68_P22015879  | chr3:28162505-28162549                            | NM_001163009:391        | Tnik          | INSIDE                 | 1.526                                                        | 0.327                          | 1429.22            | 467.12             | 0.499                          | 1024.73            | 511.09             |
| A_68_P20560374  | chr11:122017670-122017714                         | NM_007830:-19           | Dbi           | DIVERGENT_PROMOTER     | 1.526                                                        | 0.212                          | 2689.91            | 570.67             | 0.324                          | 2156.88            | 698.14             |
| A_68_P26467525  | chr9:44225880-44225924                            | NM_201372:188           | Ccdc84        | INSIDE                 | 1.525                                                        | 0.332                          | 3304.29            | 1097.27            | 0.506                          | 2174.23            | 1101.07            |
| A_68_P32466000  | chrX:71269156-71269200                            | NM_001177975:79         | Irak1         | INSIDE                 | 1.524                                                        | 1.825                          | 346.10             | 631.57             | 2.781                          | 389.37             | 1082.67            |
| A_68_P24118365  | chr5:136364296-136364340                          | NM_013560:530           | Hspb1         | INSIDE                 | 1.523                                                        | 0.187                          | 2755.66            | 514.34             | 0.284                          | 1786.65            | 507.87             |
| A_68_P26531906  | chr9:55394278-55394322                            | NM_027397:5345          | Isl2          | DOWNSTREAM             | 1.522                                                        | 0.234                          | 1850.22            | 433.38             | 0.356                          | 1441.72            | 513.96             |
| A_68_P22893528  | chr4:47258456-47258500                            | NM_009928:37595         | Col15a1       | INSIDE                 | 1.522                                                        | 1.663                          | 468.23             | 778.66             | 2.531                          | 379.79             | 961.29             |
| A_68_P30379759  | chr15:81641797-81641841                           | NM_017376:-25           | Tef           | PROMOTER               | 1.521                                                        | 1.570                          | 413.49             | 649.22             | 2.388                          | 313.65             | 748.92             |
| A_68_P27880945  | chr11:66908117-66908162                           | NM_001099635:16338      | Myh3          | INSIDE                 | 1.521                                                        | 2.111                          | 436.07             | 920.67             | 3.212                          | 351.00             | 1127.30            |
| A_68_P21585133  | chr2:122060313-122060357                          | NM_146126:-240          | Sord          | PROMOTER               | 1.521                                                        | 0.373                          | 1837.63            | 684.78             | 0.567                          | 1449.10            | 821.49             |

| ProbeName      | Target position of probe on CpG island microarray | TargetID            | GeneSymbol    | CpG island Description | Ratio of relative methylation (TiO <sub>2</sub> -NP/Vehicle) | Sham group                     |                    |                    | TiO <sub>2</sub> -H group      |                    |                    |
|----------------|---------------------------------------------------|---------------------|---------------|------------------------|--------------------------------------------------------------|--------------------------------|--------------------|--------------------|--------------------------------|--------------------|--------------------|
|                |                                                   |                     |               |                        |                                                              | Relative methylation (Cy5/Cy3) | Cy3 signal (Input) | Cy5 signal (MeDIP) | Relative methylation (Cy5/Cy3) | Cy3 signal (Input) | Cy5 signal (MeDIP) |
| A_68_P20319174 | chr1:69424426-69424470                            |                     |               | Unknown                | 1.521                                                        | 1.608                          | 573.14             | 921.67             | 2.445                          | 462.84             | 1131.79            |
| A_68_P24359960 | chr6:35084098-35084143                            | NM_001164412:-383   | Cnot4         | PROMOTER               | 1.520                                                        | 2.253                          | 427.91             | 963.94             | 3.423                          | 256.87             | 879.31             |
| A_68_P21890549 | chr2:178142357-178142402                          | NM_177191:-16       | Sypc2         | PROMOTER               | 1.520                                                        | 2.826                          | 231.63             | 654.59             | 4.296                          | 230.14             | 988.75             |
| A_68_P29241525 | chr13:96374455-96374499                           | NM_010169:13912     | F2r           | INSIDE                 | 1.519                                                        | 2.412                          | 310.99             | 750.01             | 3.664                          | 265.74             | 973.81             |
| A_68_P28731503 | chr12:110272067-110272111                         | NM_001163175:34339  | Begain        | INSIDE                 | 1.519                                                        | 2.353                          | 722.34             | 1699.64            | 3.574                          | 578.02             | 2065.63            |
| A_68_P25961388 | chr8:74967563-74967607                            | NM_029782:-8529     | Calr3         | PROMOTER               | 1.519                                                        | 0.381                          | 1833.69            | 698.67             | 0.579                          | 1318.55            | 762.96             |
| A_68_P29194040 | chr13:85429148-85429192                           | NM_145452:-79       | Rasa1         | PROMOTER               | 1.518                                                        | 0.247                          | 2692.68            | 663.92             | 0.374                          | 1962.77            | 734.81             |
| A_68_P26215962 | chr8:122292157-122292201                          | NM_028883:10138     | 4632415K11Rik | INSIDE                 | 1.518                                                        | 1.472                          | 696.02             | 1024.85            | 2.236                          | 559.07             | 1249.89            |
| A_68_P27475787 | chr10:115911149-115911205                         | NM_021452:-597      | Kcnmb4        | PROMOTER               | 1.517                                                        | 2.621                          | 290.22             | 760.53             | 3.975                          | 215.55             | 856.77             |
| A_68_P24118492 | chr5:136387366-136387410                          | NM_018871:23123     | Ywhag         | INSIDE                 | 1.517                                                        | 1.841                          | 684.51             | 1259.91            | 2.792                          | 570.54             | 1593.10            |
| A_68_P28745984 | chr12:113012732-113012779                         | NM_008450:15696     | Klc1          | INSIDE                 | 1.516                                                        | 1.643                          | 686.42             | 1127.46            | 2.490                          | 533.02             | 1326.97            |
| A_68_P27290092 | chr10:80958931-80958975                           | NM_134009:156       | Ncln          | INSIDE                 | 1.516                                                        | 0.354                          | 4239.80            | 1501.56            | 0.537                          | 2783.29            | 1494.70            |
| A_68_P26886025 | chr9:121766341-121766385                          | NM_001112668:287    | Gm9790        | INSIDE                 | 1.516                                                        | 0.157                          | 3381.31            | 530.35             | 0.238                          | 2281.90            | 542.74             |
| A_68_P25614229 | chr8:3496319-3496363                              | NM_080461:3203      | Zfp358        | INSIDE                 | 1.516                                                        | 1.676                          | 1376.54            | 2306.53            | 2.540                          | 1074.47            | 2729.19            |
| A_68_P23916649 | chr5:98615733-98615777                            | NM_029947:5867      | Prdm8         | INSIDE                 | 1.516                                                        | 0.147                          | 3951.21            | 579.69             | 0.222                          | 2634.54            | 585.82             |
| A_68_P20296825 | chr1:65225492-65225536                            | NM_010497:202       | Idh1          | INSIDE                 | 1.515                                                        | 0.410                          | 1695.33            | 695.45             | 0.622                          | 1416.10            | 880.13             |
| A_68_P32563074 | chrX:98449869-98449914                            | NM_018789:25        | Foxo4         | INSIDE                 | 1.514                                                        | 2.626                          | 281.88             | 740.27             | 3.976                          | 328.81             | 1307.51            |
| A_68_P32145200 | chr19:46728723-46728767                           | NM_001177813:30854  | D19Wsu162c    | INSIDE                 | 1.514                                                        | 1.640                          | 976.15             | 1600.61            | 2.483                          | 751.59             | 1866.24            |
| A_68_P27798408 | chr11:52096304-52096348                           | NM_009331:-574      | Tcf7          | PROMOTER               | 1.514                                                        | 1.363                          | 2891.10            | 3941.51            | 2.065                          | 2257.87            | 4661.79            |
| A_68_P20348983 | chr1:74552547-74552591                            | NM_021383:-65       | Rqcd1         | PROMOTER               | 1.514                                                        | 0.174                          | 2740.05            | 477.34             | 0.264                          | 1867.95            | 492.63             |
| A_68_P29455881 | chr14:22805841-22805885                           | NM_145459:2961      | Zfp503        | INSIDE                 | 1.513                                                        | 0.347                          | 1498.64            | 519.66             | 0.525                          | 1110.85            | 582.74             |
| A_68_P26798472 | chr9:105545510-105545554                          | NM_001081309:208    | Pik3r4        | INSIDE                 | 1.512                                                        | 0.310                          | 1822.33            | 565.49             | 0.469                          | 1292.67            | 606.40             |
| A_68_P28050118 | chr1:197224447-97224491                           | NM_138657:604       | Soes7         | INSIDE                 | 1.511                                                        | 0.313                          | 1559.60            | 488.66             | 0.473                          | 1136.17            | 537.84             |
| A_68_P25827947 | chr8:46108650-46108696                            | NM_001081286:73111  | Fat1          | INSIDE                 | 1.510                                                        | 1.742                          | 344.66             | 600.52             | 2.630                          | 309.34             | 813.66             |
| A_68_P21432203 | chr2:92886316-92886360                            | NM_001177536:-37    | Prdm11        | PROMOTER               | 1.510                                                        | 1.879                          | 971.84             | 1826.31            | 2.838                          | 846.08             | 2401.58            |
| A_68_P29591677 | chr14:49685584-49685628                           | NM_144535:-563      | Mudeng        | PROMOTER               | 1.509                                                        | 0.260                          | 2330.59            | 605.85             | 0.392                          | 1785.02            | 700.21             |
| A_68_P24818072 | chr6:124946958-124947002                          | NM_001145927:-1474  | C530028021Rik | PROMOTER               | 1.509                                                        | 0.142                          | 6089.60            | 866.83             | 0.215                          | 4238.32            | 910.63             |
| A_68_P32181719 | chr19:53384898-53384942                           | NM_001008542:-75    | Mxil          | PROMOTER               | 1.508                                                        | 0.240                          | 2140.35            | 514.43             | 0.362                          | 1497.42            | 542.63             |
| A_68_P31844515 | chr18:77095020-77095064                           | NM_001109743:-101   | Skor2         | PROMOTER               | 1.508                                                        | 0.323                          | 1356.52            | 438.61             | 0.488                          | 1062.22            | 518.02             |
| A_68_P32029537 | chr19:25484593-25484638                           | NM_181404:172924    | Kank1         | INSIDE                 | 1.507                                                        | 2.285                          | 2394.53            | 5471.72            | 3.443                          | 1589.63            | 5473.83            |
| A_68_P28577470 | chr12:81858836-81858880                           | NM_001008423:2844   | Gm1568        | INSIDE                 | 1.507                                                        | 2.963                          | 556.94             | 1650.35            | 4.466                          | 420.40             | 1877.31            |
| A_68_P23590340 | chr5:34000396-34000440                            | NM_026698:63        | Tmem129       | INSIDE                 | 1.506                                                        | 0.268                          | 1998.42            | 535.52             | 0.404                          | 1330.61            | 536.91             |
| A_68_P27958481 | chr11:80966909-80966953                           | NM_007384:-525      | Acen1         | PROMOTER               | 1.504                                                        | 0.414                          | 1496.46            | 619.82             | 0.623                          | 1191.67            | 742.41             |
| A_68_P26247733 | chr8:127317798-127317842                          | NM_198632:902       | Trim67        | INSIDE                 | 1.504                                                        | 0.233                          | 3066.14            | 714.57             | 0.351                          | 2096.77            | 735.01             |
| A_68_P31879113 | chr18:83078968-83079012                           | NM_183033:-1280     | Zfp516        | PROMOTER               | 1.503                                                        | 0.335                          | 7196.37            | 2414.20            | 0.504                          | 4540.73            | 2289.47            |
| A_68_P25954889 | chr8:73437195-73437239                            | NM_173013:7344      | Mtap1s        | INSIDE                 | 1.503                                                        | 2.443                          | 1002.78            | 2450.27            | 3.673                          | 734.12             | 2696.25            |
| A_68_P23991446 | chr5:112755370-112755414                          | NM_018783:4         | Tfp11         | INSIDE                 | 1.503                                                        | 0.238                          | 1951.80            | 463.90             | 0.357                          | 1333.45            | 476.26             |
| A_68_P21338760 | chr2:74520854-74520898                            | NM_008273:427       | Hoxd11        | INSIDE                 | 1.503                                                        | 1.606                          | 794.93             | 1277.00            | 2.414                          | 550.14             | 1328.16            |
| A_68_P20789366 | chr1:166388627-166388671                          | NM_009721:-162      | Atp1b1        | PROMOTER               | 1.503                                                        | 0.401                          | 2682.17            | 1076.58            | 0.603                          | 2176.29            | 132.79             |
| A_68_P30094306 | chr15:27677312-27677364                           | NM_001081302:278265 | Trio          | INSIDE                 | 1.502                                                        | 2.243                          | 997.20             | 2236.39            | 3.369                          | 801.14             | 2698.99            |
| A_68_P29428097 | chr14:17075904-17075948                           | NM_021504:-5901     | Ngly1         | PROMOTER               | 1.502                                                        | 0.405                          | 1376.50            | 557.39             | 0.608                          | 1114.37            | 677.95             |
| A_68_P23768851 | chr5:67999755-67999799                            | NM_001033415:655    | Shisa3        | INSIDE                 | 1.502                                                        | 0.275                          | 1881.37            | 517.27             | 0.413                          | 1478.53            | 610.77             |
| A_68_P22373052 | chr3:100881123-100881167                          | NM_011197:32945     | Ptgrn         | INSIDE                 | 1.502                                                        | 1.645                          | 671.72             | 1105.19            | 2.472                          | 527.59             | 1304.09            |
| A_68_P21485631 | chr2:103637120-103637164                          | NM_00111289:93      | Caprin1       | INSIDE                 | 1.502                                                        | 0.376                          | 1745.83            | 655.96             | 0.565                          | 1212.22            | 684.33             |
| A_68_P21115505 | chr2:32306645-32306689                            | NM_001164357:324    | Slc25a25      | INSIDE                 | 1.502                                                        | 1.850                          | 878.89             | 1626.27            | 2.779                          | 652.53             | 1813.39            |
| A_68_P26578207 | chr9:63606312-63606356                            | NM_016769:-533      | Smad3         | PROMOTER               | 1.501                                                        | 0.280                          | 2870.02            | 804.38             | 0.421                          | 2141.43            | 900.73             |
| A_68_P25954564 | chr8:73386897-73386941                            | NM_032397:-6011     | Kcnn1         | PROMOTER               | 1.500                                                        | 6.261                          | 840.75             | 5263.93            | 9.393                          | 619.46             | 5818.55            |
| A_68_P29560589 | chr14:41779724-41779768                           | NM_145928:350       | Tspan14       | INSIDE                 | 1.498                                                        | 0.311                          | 2156.30            | 671.09             | 0.466                          | 1756.14            | 818.69             |
| A_68_P31762245 | chr18:62340024-62340068                           | NM_007420:-433      | Adrb2         | PROMOTER               | 1.497                                                        | 0.286                          | 5597.12            | 1599.09            | 0.428                          | 3678.35            | 1573.60            |
| A_68_P28157577 | chr11:115999946-115999990                         | NM_024177:214       | Mrpl38        | INSIDE                 | 1.496                                                        | 0.146                          | 4213.24            | 615.21             | 0.218                          | 2899.57            | 633.40             |
| A_68_P25961590 | chr8:74998787-74998831                            | NM_138585:324       | Cherp         | INSIDE                 | 1.496                                                        | 0.362                          | 1851.66            | 670.40             | 0.542                          | 1371.16            | 742.64             |
| A_68_P30423838 | chr15:89026454-89026498                           | NM_027081:429       | Fam116b       | INSIDE                 | 1.495                                                        | 0.287                          | 2312.65            | 662.95             | 0.429                          | 1612.81            | 691.41             |
| A_68_P28744028 | chr12:112667836-112667880                         | NM_028807:12218     | I200009106Rik | INSIDE                 | 1.495                                                        | 0.218                          | 2027.14            | 442.13             | 0.326                          | 1484.02            | 483.74             |
| A_68_P28323159 | chr12:30687550-30687594                           | NM_181395:64672     | Pxdn          | INSIDE                 | 1.495                                                        | 1.522                          | 1278.87            | 1946.33            | 2.275                          | 930.64             | 2116.85            |
| A_68_P28053987 | chr11:97883567-97883611                           | NM_001159320:-3902  | Cacnb1        | PROMOTER               | 1.495                                                        | 0.412                          | 1795.08            | 739.36             | 0.616                          | 1382.62            | 851.43             |
| A_68_P27290579 | chr10:81033785-81033829                           | NM_019725:-4470     | Tle2          | PROMOTER               | 1.495                                                        | 0.223                          | 3792.39            | 844.11             | 0.333                          | 2763.30            | 919.66             |
| A_68_P24798787 | chr6:120444078-120444122                          | NM_033567:-275      | Ccer6         | PROMOTER               | 1.495                                                        | 1.560                          | 620.17             | 967.69             | 2.332                          | 424.24             | 989.39             |
| A_68_P21776096 | chr2:157104650-157104694                          | NM_019642:-161      | Rpn2          | PROMOTER               | 1.495                                                        | 0.383                          | 1150.39            | 440.03             | 0.572                          | 940.28             | 537.65             |
| A_68_P31932217 | chr19:6015773-6015817                             | NM_007600:-547      | Capn1         | PROMOTER               | 1.494                                                        | 0.222                          | 2524.93            | 560.52             | 0.332                          | 1773.39            | 588.10             |
| A_68_P26714899 | chr9:89804436-89804480                            | NM_001039655:-154   | Rasgrfl       | PROMOTER               | 1.494                                                        | 0.407                          | 1766.08            | 718.53             | 0.608                          | 1267.68            | 770.30             |
| A_68_P20632245 | chr1:136131391-136131435                          | NM_001008533:592    | Adora1        | INSIDE                 | 1.494                                                        | 0.228                          | 3375.96            | 770.44             | 0.341                          | 2233.62            | 761.32             |
| A_68_P31928782 | chr19:5457485-5457529                             | NM_198616:43        | Ccdc85b       | INSIDE                 | 1.493                                                        | 1.660                          | 560.01             | 929.53             | 2.479                          | 445.61             | 1104.47            |
| A_68_P30511520 | chr16:4679389-4679433                             | NM_030205:310       | Coro7         | INSIDE                 | 1.493                                                        | 2.515                          | 179.13             | 450.45             | 3.753                          | 130.50             | 489.80             |
| A_68_P28737553 | chr12:111517859-111517903                         | NM_172119:441       | Dio3          | INSIDE                 | 1.493                                                        | 0.394                          | 1607.95            | 633.51             | 0.588                          | 1262.64            | 742.74             |
| A_68_P24050685 | chr5:122952811-122952855                          | NM_009722:-598      | Atp2a2        | PROMOTER               | 1.493                                                        | 0.267                          | 2360.21            | 629.74             | 0.398                          | 1663.02            | 662.67             |

| ProbeName      | Target position of probe on CpG island microarray | TargetID               | GeneSymbol    | CpG island Description | Ratio of relative methylation (TiO <sub>2</sub> -NP/Vehicle) | Sham group                     |                    |                    | TiO <sub>2</sub> -H group      |                    |                    |
|----------------|---------------------------------------------------|------------------------|---------------|------------------------|--------------------------------------------------------------|--------------------------------|--------------------|--------------------|--------------------------------|--------------------|--------------------|
|                |                                                   |                        |               |                        |                                                              | Relative methylation (Cy5/Cy3) | Cy3 signal (Input) | Cy5 signal (MeDIP) | Relative methylation (Cy5/Cy3) | Cy3 signal (Input) | Cy5 signal (MeDIP) |
| A_68_P23955548 | chr5:105910054-105910098                          | NM_001033550:65283     | Lrrc8b        | INSIDE                 | 1.493                                                        | 1.755                          | 928.19             | 1629.41            | 2.622                          | 664.51             | 1742.14            |
| A_68_P20038599 | chr1:12982807-12982851                            | NM_172841:-1612        | Sleo5a1       | PROMOTER               | 1.493                                                        | 2.100                          | 6705.62            | 14083.00           | 3.136                          | 4703.65            | 14752.82           |
| A_68_P28752829 | chr12:114067223-114067267                         | NM_028023:356          | Cdca4         | INSIDE                 | 1.492                                                        | 0.204                          | 3445.97            | 701.86             | 0.304                          | 2245.65            | 682.24             |
| A_68_P24768720 | chr6:114987629-114987673                          | NM_026894:242          | 1500001M20Rik | INSIDE                 | 1.492                                                        | 0.310                          | 1626.85            | 503.87             | 0.462                          | 1311.80            | 606.24             |
| A_68_P23188358 | chr4:106739774-106739823                          | NM_025500:-327         | Mrpl37        | DIVERGENT_PROMOTER     | 1.492                                                        | 0.222                          | 2543.79            | 564.54             | 0.331                          | 1881.77            | 623.06             |
| A_68_P21867219 | chr2:172847604-172847648                          | NM_019547:224          | Rbm38         | INSIDE                 | 1.492                                                        | 0.299                          | 1981.76            | 592.34             | 0.446                          | 1198.76            | 534.71             |
| A_68_P25499768 | chr7:133436020-133436064                          | NM_145587:19910        | Sbk1          | INSIDE                 | 1.491                                                        | 2.371                          | 750.14             | 1778.46            | 3.535                          | 682.32             | 2411.94            |
| A_68_P23295722 | chr4:128916103-128916147                          | NM_001033189:9563      | C77080        | INSIDE                 | 1.491                                                        | 0.242                          | 2777.08            | 670.86             | 0.360                          | 1912.04            | 688.74             |
| A_68_P32053974 | chr19:29700925-29700969                           | NM_001081213:21964     | Emp1          | INSIDE                 | 1.490                                                        | 1.437                          | 14870.57           | 21368.74           | 2.141                          | 10056.66           | 21529.80           |
| A_68_P31412092 | chr17:86084426-86084470                           | NM_011380:3146         | Six2          | INSIDE                 | 1.490                                                        | 0.304                          | 2298.26            | 697.67             | 0.452                          | 1579.89            | 714.42             |
| A_68_P23344532 | chr4:137773013-137773058                          | NM_001122897:-10       | Hp1bp3        | PROMOTER               | 1.490                                                        | 0.332                          | 1469.03            | 487.61             | 0.494                          | 1216.64            | 601.62             |
| A_68_P20058119 | chr1:17081907-17081951                            | NM_020604:6042         | Jph1          | INSIDE                 | 1.489                                                        | 2.146                          | 530.95             | 1139.20            | 3.196                          | 474.77             | 1517.24            |
| A_68_P31206536 | chr17:46520399-46520443                           | NM_207671:-294         | Zfp318        | PROMOTER               | 1.488                                                        | 0.309                          | 1845.88            | 569.79             | 0.459                          | 1433.35            | 658.47             |
| A_68_P24793359 | chr6:119431189-119431233                          | NM_133940:1525         | Fbxl14        | INSIDE                 | 1.487                                                        | 0.145                          | 3293.49            | 477.92             | 0.216                          | 2414.79            | 521.20             |
| A_68_P22510090 | chr3:127398655-127398699                          | NM_027808:84769        | Alpk1         | INSIDE                 | 1.487                                                        | 0.263                          | 1713.52            | 449.90             | 0.390                          | 1307.97            | 510.71             |
| A_68_P32456123 | chrX:69207672-69207716                            | NM_001081135:-665      | Prrg3         | PROMOTER               | 1.486                                                        | 1.715                          | 521.27             | 893.92             | 2.549                          | 611.88             | 1559.40            |
| A_68_P29269472 | chr13:101421231-101421275                         | NM_027139:-45          | Taf9          | DIVERGENT_PROMOTER     | 1.486                                                        | 0.201                          | 2977.38            | 598.20             | 0.298                          | 2320.27            | 692.55             |
| A_68_P21840386 | chr2:168088202-168088246                          | NM_001081134:6607      | Kcng1         | INSIDE                 | 1.486                                                        | 1.802                          | 375.56             | 676.85             | 2.679                          | 316.31             | 847.29             |
| A_68_P21005390 | chr2:11212009-11212053                            | NM_008859:118022       | Prkcq         | INSIDE                 | 1.486                                                        | 1.996                          | 465.40             | 928.98             | 2.967                          | 427.72             | 1268.93            |
| A_68_P20593980 | chr1:129102101-129102145                          | NM_145128:560          | Mgat5         | INSIDE                 | 1.486                                                        | 0.384                          | 2405.19            | 924.39             | 0.571                          | 1914.13            | 1092.94            |
| A_68_P23424870 | chr4:152806765-152806809                          | NM_001099299:50153     | Ajap1         | INSIDE                 | 1.485                                                        | 1.667                          | 1071.95            | 1787.43            | 2.475                          | 801.26             | 1983.50            |
| A_68_P20349425 | chr1:74634360-74634404                            | NM_029888:220          | Zfp142        | INSIDE                 | 1.485                                                        | 0.211                          | 2847.42            | 602.04             | 0.314                          | 2206.03            | 692.71             |
| A_68_P31119041 | chr17:28024335-28024379                           | NM_001080769:30905     | Uhrf1bp1      | INSIDE                 | 1.484                                                        | 1.932                          | 1024.68            | 1979.50            | 2.866                          | 802.44             | 2300.13            |
| A_68_P20561481 | chr1:122238357-122238401                          | NM_207233:1220         | C1ql2         | INSIDE                 | 1.484                                                        | 0.122                          | 5126.44            | 623.20             | 0.180                          | 3362.12            | 606.34             |
| A_68_P29448170 | chr14:21480684-21480728                           | NM_175132:6822         | Synpo2l       | INSIDE                 | 1.483                                                        | 1.696                          | 430.91             | 730.67             | 2.514                          | 349.81             | 879.38             |
| A_68_P27924588 | chr11:74982421-74982465                           | NM_001098203:-788      | Hic1          | PROMOTER               | 1.483                                                        | 0.223                          | 2789.76            | 622.65             | 0.331                          | 1786.26            | 591.23             |
| A_68_P26527191 | chr9:54546796-54546840                            | NM_021422:-547         | Dnaj4         | PROMOTER               | 1.483                                                        | 0.457                          | 3364.50            | 1538.70            | 0.678                          | 2288.87            | 1551.86            |
| A_68_P24117822 | chr5:136253735-136253779                          | NM_029659:499          | Styx1l        | INSIDE                 | 1.483                                                        | 0.327                          | 1575.25            | 515.05             | 0.485                          | 1214.89            | 589.07             |
| A_68_P30480361 | chr15:99300972-99301016                           | NM_029236:4167         | Bcdin3d       | INSIDE                 | 1.482                                                        | 1.698                          | 755.14             | 1282.56            | 2.517                          | 565.91             | 1424.31            |
| A_68_P30349378 | chr15:76437639-76437683                           | NM_001164173:361       | Cpsfl         | INSIDE                 | 1.482                                                        | 0.293                          | 1802.58            | 528.55             | 0.434                          | 1328.22            | 577.00             |
| A_68_P26750484 | chr9:96919484-96919528                            | NM_145134:-732         | Spsb4         | PROMOTER               | 1.482                                                        | 1.581                          | 1387.59            | 2193.63            | 2.343                          | 1037.77            | 2431.98            |
| A_68_P25954892 | chr8:73437474-73437518                            | NM_173013:7624         | Mtap1s        | INSIDE                 | 1.482                                                        | 2.138                          | 659.65             | 1410.59            | 3.169                          | 504.98             | 1600.14            |
| A_68_P20186159 | chr1:43009715-43009759                            | NM_053107:20           | Gpr45         | INSIDE                 | 1.482                                                        | 0.442                          | 3575.55            | 1582.14            | 0.656                          | 2387.26            | 1565.97            |
| A_68_P28600846 | chr12:86216896-86216940                           | NR_028577:167          | D030025P21Rik | INSIDE                 | 1.481                                                        | 1.761                          | 352.76             | 621.04             | 2.607                          | 249.52             | 650.40             |
| A_68_P24798990 | chr6:120481585-120481629                          | NM_144815:-289         | Cecr5         | PROMOTER               | 1.481                                                        | 0.223                          | 2334.95            | 521.75             | 0.331                          | 1678.15            | 555.28             |
| A_68_P21753656 | chr2:153051085-153051129                          | NM_198617:71           | Tsply3        | INSIDE                 | 1.481                                                        | 0.312                          | 1707.80            | 532.78             | 0.462                          | 1310.27            | 605.32             |
| A_68_P29102523 | chr13:65361108-65361152                           | ENSMUST00000099425:284 |               | INSIDE                 | 1.480                                                        | 1.831                          | 537.69             | 984.76             | 2.711                          | 457.80             | 1241.13            |
| A_68_P28525536 | chr12:72418903-72418947                           | NM_001190466:8054      | Dact1         | INSIDE                 | 1.480                                                        | 1.625                          | 692.80             | 1125.76            | 2.405                          | 605.88             | 1457.35            |
| A_68_P24287932 | chr6:21801985-21802029                            | NM_173007:509          | Tspan12       | INSIDE                 | 1.479                                                        | 0.177                          | 2617.51            | 462.38             | 0.261                          | 1969.84            | 514.64             |
| A_68_P29484384 | chr14:27783854-27783898                           | NM_145221:-139         | App1l         | PROMOTER               | 1.478                                                        | 0.416                          | 2215.21            | 921.88             | 0.615                          | 1650.48            | 1015.43            |
| A_68_P24138647 | chr5:140447479-140447523                          | NM_175522:63604        | Elfn1         | INSIDE                 | 1.478                                                        | 2.014                          | 975.97             | 1965.46            | 2.977                          | 871.55             | 2594.99            |
| A_68_P32103772 | chr19:38893658-38893702                           | NM_021315:47           | Noc3l         | INSIDE                 | 1.477                                                        | 0.129                          | 3613.42            | 466.31             | 0.191                          | 2516.37            | 479.59             |
| A_68_P26429693 | chr9:37062879-37062923                            | NM_001145960:423       | Slc37a2       | INSIDE                 | 1.477                                                        | 0.310                          | 2929.52            | 908.09             | 0.458                          | 1999.90            | 915.53             |
| A_68_P32132942 | chr19:44629636-44629680                           | NM_026061:247          | Ndufb8        | INSIDE                 | 1.476                                                        | 0.254                          | 2687.58            | 682.13             | 0.375                          | 1827.03            | 684.54             |
| A_68_P31058944 | chr17:14416346-14416390                           | NM_022315:-144         | Smoc2         | PROMOTER               | 1.476                                                        | 0.355                          | 1502.36            | 533.10             | 0.524                          | 1017.77            | 533.14             |
| A_68_P28694110 | chr12:104116592-104116636                         | NM_172806:2            | Btdb7         | INSIDE                 | 1.476                                                        | 2.194                          | 428.52             | 940.25             | 3.238                          | 409.84             | 1326.94            |
| A_68_P25950467 | chr8:72736364-72736408                            | NM_001007570:-206      | Slc25a42      | PROMOTER               | 1.476                                                        | 0.280                          | 2400.13            | 670.88             | 0.413                          | 1749.72            | 721.99             |
| A_68_P27826628 | chr11:57458677-57458721                           | NM_134189:-245         | Galnt10       | PROMOTER               | 1.475                                                        | 0.368                          | 2311.20            | 850.87             | 0.543                          | 1679.48            | 912.06             |
| A_68_P23837519 | chr5:81449181-81449225                            | NM_198702:-1415        | Lphn3         | PROMOTER               | 1.475                                                        | 1.885                          | 891.41             | 1679.91            | 2.780                          | 740.39             | 2058.40            |
| A_68_P21840388 | chr2:168088389-168088433                          | NM_001081134:6421      | Kcng1         | INSIDE                 | 1.475                                                        | 1.551                          | 1101.21            | 1708.13            | 2.288                          | 811.30             | 1856.15            |
| A_68_P30425291 | chr15:89288179-89288223                           | NM_021921:3859         | Mapk8ip2      | INSIDE                 | 1.474                                                        | 1.697                          | 1294.85            | 2197.20            | 2.501                          | 1029.80            | 2575.61            |
| A_68_P27160892 | chr10:57251955-57251999                           | NM_019760:359          | Serinc1       | INSIDE                 | 1.474                                                        | 0.401                          | 1962.12            | 787.60             | 0.592                          | 1514.33            | 895.89             |
| A_68_P26997093 | chr10:21870689-21870733                           | NM_009016:-7704        | Raet1a        | PROMOTER               | 1.474                                                        | 0.304                          | 1554.03            | 473.06             | 0.449                          | 1067.37            | 478.88             |
| A_68_P25010075 | chr7:26164748-26164792                            | NM_001039507:10355     | Lipe          | INSIDE                 | 1.474                                                        | 0.269                          | 2153.44            | 578.72             | 0.396                          | 1674.69            | 663.53             |
| A_68_P22311356 | chr3:87827542-87827586                            | NM_022031:3869         | Hapln2        | INSIDE                 | 1.474                                                        | 0.319                          | 2906.19            | 925.63             | 0.470                          | 2056.44            | 965.53             |
| A_68_P31256955 | chr17:56705842-56705886                           | NM_001029979:18142     | Safb2         | INSIDE                 | 1.473                                                        | 1.365                          | 2049.07            | 2796.10            | 2.010                          | 1660.34            | 3337.70            |
| A_68_P23185612 | chr4:106311841-106311885                          | NM_177667:16809        | Ttc22         | INSIDE                 | 1.473                                                        | 2.053                          | 1374.58            | 2822.08            | 3.025                          | 1133.36            | 3427.99            |
| A_68_P29613438 | chr14:55260166-55260210                           | NM_199470:13           | Cdh24         | INSIDE                 | 1.472                                                        | 1.490                          | 944.28             | 1407.35            | 2.194                          | 693.17             | 1520.53            |
| A_68_P20613815 | chr1:133034491-133034535                          | NM_145508:299          | Dyrk3         | INSIDE                 | 1.472                                                        | 0.319                          | 2079.97            | 662.91             | 0.469                          | 1667.59            | 782.47             |
| A_68_P20510206 | chr1:108656242-108656286                          | NM_027534:55           | Kdsr          | INSIDE                 | 1.472                                                        | 0.324                          | 3033.64            | 982.43             | 0.477                          | 2091.65            | 997.31             |
| A_68_P32126392 | chr19:43502033-43502077                           |                        | Unknown       | Unknown                | 1.471                                                        | 2.225                          | 881.98             | 1962.28            | 3.274                          | 661.94             | 2167.11            |
| A_68_P31373925 | chr17:79234724-79234768                           | NM_001081179:-25       | Heat5b        | DIVERGENT_PROMOTER     | 1.471                                                        | 0.271                          | 1815.91            | 491.99             | 0.399                          | 1360.14            | 542.04             |
| A_68_P23807228 | chr5:75472072-75472116                            | NM_133256:469          | Gsx2          | INSIDE                 | 1.470                                                        | 0.389                          | 2239.96            | 872.28             | 0.572                          | 1597.95            | 914.67             |
| A_68_P21766452 | chr2:155418422-155418466                          | NM_008180:-2           | Gss           | PROMOTER               | 1.470                                                        | 0.289                          | 1828.49            | 527.90             | 0.425                          | 1375.27            | 583.84             |
| A_68_P32029536 | chr19:25484468-25484512                           | NM_181404:172799       | Kank1         | INSIDE                 | 1.468                                                        | 1.942                          | 1131.13            | 2196.25            | 2.850                          | 901.39             | 2568.88            |

| ProbeName      | Target position of probe on CpG island microarray | TargetID            | GeneSymbol    | CpG island Description | Ratio of relative methylation (TiO <sub>2</sub> -NP/Vehicle) | Sham group                     |                    |                    | TiO <sub>2</sub> -H group      |                    |                    |
|----------------|---------------------------------------------------|---------------------|---------------|------------------------|--------------------------------------------------------------|--------------------------------|--------------------|--------------------|--------------------------------|--------------------|--------------------|
|                |                                                   |                     |               |                        |                                                              | Relative methylation (Cy5/Cy3) | Cy3 signal (Input) | Cy5 signal (MeDIP) | Relative methylation (Cy5/Cy3) | Cy3 signal (Input) | Cy5 signal (MeDIP) |
| A_68_P24034078 | chr5:120130938-120130982                          | NM_011535:10283     | Tbx3          | INSIDE                 | 1.468                                                        | 0.317                          | 2251.38            | 714.73             | 0.466                          | 1499.98            | 699.25             |
| A_68_P26891189 | chr9:122656317-122656361                          | NM_001199736:-125   | Gm9524        | PROMOTER               | 1.467                                                        | 1.891                          | 267.91             | 506.63             | 2.774                          | 252.70             | 700.86             |
| A_68_P26891187 | chr9:122656143-122656187                          | NM_001199736:-299   | Gm9524        | PROMOTER               | 1.467                                                        | 1.793                          | 950.60             | 1704.26            | 2.630                          | 742.34             | 1952.09            |
| A_68_P25957393 | chr8:74067094-74067138                            | NM_028617:288       | Fam125a       | INSIDE                 | 1.467                                                        | 0.290                          | 2292.09            | 665.51             | 0.426                          | 1776.41            | 756.89             |
| A_68_P24863967 | chr6:134819942-134819986                          | NM_001167697:17913  | Gpr19         | INSIDE                 | 1.467                                                        | 1.994                          | 598.92             | 1194.23            | 2.926                          | 467.39             | 1367.39            |
| A_68_P33012181 | chr9_random:57403-57447                           | NR_027950:2732      | 4930526115Rik | DOWNSTREAM             | 1.466                                                        | 0.369                          | 1779.20            | 656.88             | 0.541                          | 1298.22            | 702.63             |
| A_68_P30559115 | chr16:13819208-13819252                           | NM_010946:-139      | Ntan1         | PROMOTER               | 1.466                                                        | 0.278                          | 1848.89            | 513.98             | 0.407                          | 1317.47            | 536.84             |
| A_68_P21081131 | chr2:26771732-26771776                            | NM_013678:-186      | Surf2         | PROMOTER               | 1.466                                                        | 0.388                          | 1285.05            | 498.01             | 0.568                          | 1038.40            | 589.78             |
| A_68_P27568396 | chr11:6315839-6315883                             | NM_008907:-12       | Ppia          | PROMOTER               | 1.464                                                        | 0.244                          | 2060.69            | 502.42             | 0.357                          | 1452.93            | 518.76             |
| A_68_P26667556 | chr9:79915402-79915446                            | NM_146003:715       | Serp6         | INSIDE                 | 1.464                                                        | 0.392                          | 1468.25            | 575.70             | 0.574                          | 1044.63            | 599.56             |
| A_68_P24838282 | chr6:128250695-128250739                          | NM_001080979:115    | Tead4         | INSIDE                 | 1.464                                                        | 0.076                          | 7095.42            | 538.99             | 0.111                          | 5395.04            | 599.85             |
| A_68_P20224252 | chr1:51972666-51972710                            | NM_001161817:130    | Myo1b         | INSIDE                 | 1.464                                                        | 0.115                          | 4570.39            | 524.83             | 0.168                          | 3119.15            | 524.53             |
| A_68_P32233092 | chrX:5660427-5660471                              | NM_001033211:90     | AU022751      | INSIDE                 | 1.463                                                        | 1.728                          | 399.75             | 690.65             | 2.528                          | 531.11             | 1342.85            |
| A_68_P23295627 | chr4:128901057-128901101                          | NM_001033189:24609  | C77080        | INSIDE                 | 1.462                                                        | 1.615                          | 967.28             | 1562.22            | 2.362                          | 714.02             | 1686.30            |
| A_68_P31084705 | chr17:21146214-21146258                           | NM_145483:332       | Zfp160        | INSIDE                 | 1.460                                                        | 0.340                          | 3278.27            | 1115.15            | 0.497                          | 2376.09            | 1180.36            |
| A_68_P21820025 | chr2:164659401-164659445                          | NM_001082974:-326   | Neur12        | PROMOTER               | 1.460                                                        | 0.262                          | 2567.96            | 671.78             | 0.382                          | 1999.39            | 763.39             |
| A_68_P20405971 | chr1:84836410-84836454                            | NM_025386:17        | Fbxo36        | INSIDE                 | 1.460                                                        | 1.784                          | 1517.11            | 2705.86            | 2.604                          | 1125.36            | 2930.68            |
| A_68_P20149939 | chr1:36766403-36766447                            | NM_146107:346       | Actr1b        | INSIDE                 | 1.460                                                        | 0.174                          | 3005.28            | 521.50             | 0.253                          | 2295.79            | 581.80             |
| A_68_P30500861 | chr15:102773323-102773367                         | NM_010463:6061      | Hoxc12        | DOWNSTREAM             | 1.459                                                        | 0.350                          | 1879.01            | 658.47             | 0.511                          | 1333.67            | 681.77             |
| A_68_P28037998 | chr11:95171463-95171507                           | NM_001195003:76     | Myst2         | INSIDE                 | 1.459                                                        | 0.335                          | 2082.59            | 698.04             | 0.489                          | 1691.45            | 826.93             |
| A_68_P31668416 | chr18:44821733-44821777                           | NM_001085374:166    | Mce           | INSIDE                 | 1.458                                                        | 3.135                          | 1511.76            | 4739.71            | 4.571                          | 1495.40            | 6834.87            |
| A_68_P31634885 | chr18:38761130-38761174                           | NM_011898:-230      | Spry4         | PROMOTER               | 1.458                                                        | 2.425                          | 310.67             | 753.24             | 3.535                          | 261.06             | 922.83             |
| A_68_P30895372 | chr16:78302001-78302045                           | NM_001025192:87     | Cxadr         | INSIDE                 | 1.458                                                        | 0.272                          | 1726.82            | 470.51             | 0.397                          | 1177.72            | 468.02             |
| A_68_P30255522 | chr15:59481111-59481155                           | NM_144549:924       | Trib1         | INSIDE                 | 1.458                                                        | 0.262                          | 3244.64            | 851.06             | 0.382                          | 2232.25            | 853.81             |
| A_68_P27704166 | chr11:34935291-34935335                           | NM_011412:355       | Slit3         | INSIDE                 | 1.458                                                        | 0.287                          | 2142.64            | 613.88             | 0.418                          | 1614.54            | 674.64             |
| A_68_P25730825 | chr8:27230377-27230421                            | NM_029965:547       | Rnf170        | INSIDE                 | 1.458                                                        | 1.895                          | 299.19             | 566.91             | 2.762                          | 296.58             | 819.22             |
| A_68_P24269923 | chr6:17790613-17790657                            | NM_001083315:91419  | Sl7           | INSIDE                 | 1.458                                                        | 1.970                          | 635.04             | 1251.07            | 2.873                          | 548.18             | 1574.71            |
| A_68_P31425149 | chr17:88196609-88196653                           | NM_199251:704       | Kenk12        | INSIDE                 | 1.457                                                        | 1.778                          | 445.17             | 791.55             | 2.591                          | 353.72             | 916.39             |
| A_68_P30575742 | chr16:17798080-17798124                           | NM_153790:728       | Scarf2        | INSIDE                 | 1.457                                                        | 0.348                          | 1807.80            | 629.33             | 0.507                          | 1378.11            | 699.04             |
| A_68_P27897910 | chr11:69727956-69728000                           | NM_019726:285       | Gps2          | INSIDE                 | 1.457                                                        | 0.189                          | 2677.58            | 506.30             | 0.275                          | 2078.72            | 572.52             |
| A_68_P25637619 | chr8:8660957-8661001                              | NM_010111:-205      | Efnb2         | PROMOTER               | 1.457                                                        | 0.337                          | 1939.01            | 654.25             | 0.492                          | 1459.46            | 717.66             |
| A_68_P25090607 | chr7:52263642-52263686                            | NM_001008422:7955   | Scaf1         | INSIDE                 | 1.457                                                        | 1.447                          | 770.73             | 1115.21            | 2.108                          | 646.02             | 1361.52            |
| A_68_P24863968 | chr6:134820038-134820082                          | NM_001167697:17817  | Gpr19         | INSIDE                 | 1.457                                                        | 1.436                          | 998.29             | 1433.34            | 2.092                          | 807.29             | 1688.85            |
| A_68_P24760939 | chr6:113646833-113646877                          | NM_001033463:-638   | Tatdn2        | PROMOTER               | 1.457                                                        | 0.214                          | 2098.05            | 448.47             | 0.311                          | 1556.25            | 484.64             |
| A_68_P22483671 | chr3:122323019-122323074                          | NM_001114665:-461   | Fnbp11        | PROMOTER               | 1.457                                                        | 2.883                          | 722.61             | 2083.63            | 4.202                          | 656.22             | 2727.69            |
| A_68_P21783958 | chr2:158440228-158440272                          | NM_009508:3757      | Slc32a1       | INSIDE                 | 1.457                                                        | 0.383                          | 1564.31            | 599.23             | 0.558                          | 1190.87            | 664.87             |
| A_68_P29098140 | chr13:64375537-64375581                           | NM_172587:738       | Cdc14b        | INSIDE                 | 1.456                                                        | 0.413                          | 1301.25            | 537.40             | 0.601                          | 1157.75            | 695.93             |
| A_68_P27356012 | chr10:93309036-93309080                           | NM_183199:14759     | Usp44         | INSIDE                 | 1.456                                                        | 1.609                          | 1114.25            | 1792.38            | 2.343                          | 963.41             | 2257.08            |
| A_68_P30244924 | chr15:57743688-57743732                           | NM_001167679:-43    | Wdr67         | PROMOTER               | 1.455                                                        | 0.415                          | 1676.36            | 695.60             | 0.604                          | 1266.67            | 764.71             |
| A_68_P24771973 | chr6:115552217-115552261                          | NM_023290:283       | Mkx2          | INSIDE                 | 1.455                                                        | 0.244                          | 4188.74            | 1023.94            | 0.356                          | 3027.77            | 1076.57            |
| A_68_P29055509 | chr13:55614601-55614645                           | NM_001114088:178    | Pdlim7        | INSIDE                 | 1.454                                                        | 0.138                          | 3572.18            | 492.36             | 0.200                          | 2517.06            | 504.44             |
| A_68_P27913322 | chr11:72609852-72609896                           | NM_001045536:147    | Zzef1         | INSIDE                 | 1.454                                                        | 0.242                          | 2172.23            | 524.63             | 0.351                          | 1651.45            | 580.12             |
| A_68_P26867068 | chr9:118468753-118468797                          | NM_018748:53339     | Golga4        | INSIDE                 | 1.454                                                        | 2.311                          | 1290.27            | 2981.63            | 3.359                          | 1100.50            | 3696.71            |
| A_68_P24025035 | chr5:118619751-118619795                          | NM_007545:0         | Hrk           | INSIDE                 | 1.454                                                        | 1.427                          | 2488.24            | 3549.70            | 2.074                          | 1846.17            | 3828.29            |
| A_68_P21102108 | chr2:30111813-30111859                            | NM_177725:18548     | Lrrc8a        | INSIDE                 | 1.454                                                        | 1.701                          | 354.95             | 603.85             | 2.474                          | 274.85             | 679.86             |
| A_68_P32054107 | chr19:29722618-29722662                           | NM_001081213:270    | Ermp1         | INSIDE                 | 1.453                                                        | 0.411                          | 1390.11            | 571.51             | 0.597                          | 1153.53            | 689.23             |
| A_68_P30510672 | chr16:4541712-4541756                             | NM_031182:17986     | Tcfap4        | DOWNSTREAM             | 1.453                                                        | 0.294                          | 2107.96            | 620.66             | 0.428                          | 1487.34            | 636.36             |
| A_68_P28752184 | chr12:113977018-113977062                         | NM_001024602:16656  | AW555464      | INSIDE                 | 1.453                                                        | 1.591                          | 1371.26            | 2181.14            | 2.312                          | 1034.77            | 2392.12            |
| A_68_P28727032 | chr12:109512870-109512914                         | NM_001159910:735    | Ccdc85c       | INSIDE                 | 1.453                                                        | 2.704                          | 1089.52            | 2946.28            | 3.928                          | 783.45             | 3077.46            |
| A_68_P26037062 | chr8:90305072-90305116                            | NM_033327:178400    | Zfp423        | INSIDE                 | 1.453                                                        | 1.866                          | 763.14             | 1423.87            | 2.712                          | 583.10             | 1581.15            |
| A_68_P24540589 | chr6:72184688-72184732                            | NM_153778:861       | Atoh8         | INSIDE                 | 1.453                                                        | 0.181                          | 3571.94            | 647.15             | 0.263                          | 2632.80            | 692.91             |
| A_68_P24052414 | chr5:123270992-123271036                          | NM_001042491:334    | Anapc5        | INSIDE                 | 1.453                                                        | 27.981                         | 2422.47            | 67783.89           | 40.662                         | 2751.94            | 111899.60          |
| A_68_P24039105 | chr5:120953280-120953324                          | NM_023625:330       | Plbd2         | INSIDE                 | 1.453                                                        | 1.750                          | 351.45             | 615.07             | 2.543                          | 260.57             | 662.60             |
| A_68_P21054134 | chr2:21127399-21127443                            | NM_001001297:70     | Thns1         | INSIDE                 | 1.453                                                        | 0.314                          | 2218.94            | 696.83             | 0.456                          | 1706.96            | 778.72             |
| A_68_P30397298 | chr15:84685375-84685419                           | NM_001081166:1163   | Phf21b        | INSIDE                 | 1.452                                                        | 0.329                          | 1796.30            | 590.50             | 0.477                          | 1342.54            | 640.98             |
| A_68_P29309818 | chr13:108948386-108948430                         | NM_001127346:411    | Ndufa12       | INSIDE                 | 1.452                                                        | 0.322                          | 2264.22            | 728.08             | 0.467                          | 1490.35            | 695.71             |
| A_68_P27564655 | chr11:5616910-5616954                             | NM_178623:24247     | Urgcp         | INSIDE                 | 1.452                                                        | 1.888                          | 482.96             | 912.02             | 2.742                          | 471.85             | 1293.64            |
| A_68_P22941606 | chr4:56815104-56815148                            | NM_001081420:-74    | BC026590      | PROMOTER               | 1.452                                                        | 0.217                          | 2039.97            | 443.65             | 0.316                          | 1317.03            | 415.85             |
| A_68_P22629195 | chr3:148480715-148480769                          | NM_001081298:136857 | Lphn2         | INSIDE                 | 1.452                                                        | 1.522                          | 532.09             | 809.97             | 2.211                          | 364.52             | 805.84             |
| A_68_P30232954 | chr15:55388910-55388954                           | NM_001168250:-30    | Mtbp          | DIVERGENT_PROMOTER     | 1.451                                                        | 0.204                          | 3223.79            | 656.96             | 0.296                          | 2013.26            | 595.38             |
| A_68_P24631554 | chr6:90259619-90259663                            | NM_027928:15539     | Chst13        | INSIDE                 | 1.450                                                        | 1.624                          | 697.70             | 1133.18            | 2.356                          | 576.80             | 1358.75            |
| A_68_P31093842 | chr17:23956720-23956764                           | NM_175229:16589     | Srrm2         | INSIDE                 | 1.449                                                        | 2.102                          | 794.32             | 1669.99            | 3.045                          | 632.05             | 1924.81            |
| A_68_P25833744 | chr8:47085514-47085558                            | NM_001039562:-332   | Ankrd37       | PROMOTER               | 1.449                                                        | 0.125                          | 5969.60            | 744.53             | 0.181                          | 3564.14            | 644.01             |
| A_68_P25614335 | chr8:3515288-3515332                              | NM_001122818:-73    | Pnpla6        | PROMOTER               | 1.449                                                        | 0.224                          | 2507.71            | 562.64             | 0.325                          | 2030.39            | 660.31             |
| A_68_P26373638 | chr9:26837452-26837496                            | NM_178027:205       | Vps26b        | INSIDE                 | 1.448                                                        | 0.278                          | 2454.97            | 681.59             | 0.402                          | 1687.85            | 678.67             |

| ProbeName      | Target position of probe on CpG island microarray | TargetID               | GeneSymbol    | CpG island Description | Ratio of relative methylation (TiO <sub>2</sub> -NP/Vehicle) | Sham group                     |                    |                    | TiO <sub>2</sub> -H group      |                    |                    |
|----------------|---------------------------------------------------|------------------------|---------------|------------------------|--------------------------------------------------------------|--------------------------------|--------------------|--------------------|--------------------------------|--------------------|--------------------|
|                |                                                   |                        |               |                        |                                                              | Relative methylation (Cy5/Cy3) | Cy3 signal (Input) | Cy5 signal (MeDIP) | Relative methylation (Cy5/Cy3) | Cy3 signal (Input) | Cy5 signal (MeDIP) |
| A_68_P21910753 | chr2:181194478-181194522                          | NM_028125:-369         | Zbtb46        | PROMOTER               | 1.448                                                        | 2.531                          | 332.72             | 842.15             | 3.666                          | 285.08             | 1044.98            |
| A_68_P26844379 | chr9:114294023-114294067                          | NM_019922:5786         | Crtap         | INSIDE                 | 1.447                                                        | 1.494                          | 940.08             | 1404.03            | 2.161                          | 739.98             | 1599.43            |
| A_68_P31105766 | chr17:25854648-25854692                           | NM_022422:554          | Gngl3         | INSIDE                 | 1.446                                                        | 0.296                          | 1599.55            | 473.29             | 0.428                          | 1332.45            | 570.00             |
| A_68_P29751623 | chr14:79881191-79881235                           | NM_018765:-137         | Wbp4          | PROMOTER               | 1.446                                                        | 2.158                          | 464.48             | 1002.13            | 3.120                          | 363.83             | 1134.98            |
| A_68_P24542637 | chr6:72566597-72566641                            | NM_009444:124          | Tglnl2        | INSIDE                 | 1.446                                                        | 0.366                          | 1297.01            | 475.06             | 0.530                          | 962.50             | 509.71             |
| A_68_P31977525 | chr19:16059111-16059155                           | NM_198019:347          | Cep78         | INSIDE                 | 1.445                                                        | 0.377                          | 2040.10            | 770.05             | 0.545                          | 1584.63            | 864.11             |
| A_68_P30346541 | chr15:76002795-76002839                           | NM_201394:23324        | Plec          | INSIDE                 | 1.445                                                        | 1.498                          | 906.89             | 1358.49            | 2.165                          | 726.68             | 1572.94            |
| A_68_P26154294 | chr8:111474065-111474109                          | NM_007496:235543       | Zfhx3         | INSIDE                 | 1.445                                                        | 1.620                          | 714.32             | 1157.35            | 2.341                          | 540.02             | 1264.18            |
| A_68_P25565217 | chr7:144507254-144507298                          | NM_001113414:-1148     | Ebf3          | PROMOTER               | 1.445                                                        | 0.385                          | 1281.87            | 493.78             | 0.557                          | 955.01             | 531.71             |
| A_68_P25025186 | chr7:29856672-29856716                            | NM_009109:53476        | Ryrl          | INSIDE                 | 1.445                                                        | 1.872                          | 603.41             | 1129.75            | 2.705                          | 393.75             | 1064.92            |
| A_68_P29177385 | chr13:81850332-81850377                           | NM_028372:-61          | Mblac2        | DIVERGENT_PROMOTER     | 1.444                                                        | 0.274                          | 2862.63            | 784.32             | 0.396                          | 2291.99            | 906.84             |
| A_68_P24688741 | chr6:99828483-99828532                            | ENSMUST00000074759:-80 |               | PROMOTER               | 1.444                                                        | 1.669                          | 382.03             | 637.50             | 2.410                          | 325.71             | 785.01             |
| A_68_P32200577 | chr19:56471803-56471847                           | NM_007611:206          | Casp7         | INSIDE                 | 1.443                                                        | 0.247                          | 2201.57            | 544.84             | 0.357                          | 1772.55            | 632.99             |
| A_68_P26153110 | chr8:111316387-111316431                          | NM_007496:77865        | Zfhx3         | INSIDE                 | 1.443                                                        | 1.643                          | 1314.23            | 2159.27            | 2.370                          | 1051.31            | 2491.81            |
| A_68_P24372701 | chr6:37391699-37391743                            | NM_178661:428          | Creb3l2       | INSIDE                 | 1.443                                                        | 0.281                          | 1656.88            | 465.23             | 0.405                          | 1233.94            | 500.14             |
| A_68_P25736705 | chr8:28232196-28232240                            | NM_054044:35906        | Gpr124        | INSIDE                 | 1.442                                                        | 0.388                          | 1321.67            | 512.23             | 0.559                          | 1027.91            | 574.44             |
| A_68_P21334155 | chr2:73729976-73730020                            | NM_001025093:687       | Atf2          | INSIDE                 | 1.442                                                        | 0.393                          | 2833.56            | 1114.90            | 0.567                          | 2154.41            | 1222.10            |
| A_68_P26015685 | chr8:86132504-86132548                            | NM_018808:453          | Dnajb1        | INSIDE                 | 1.440                                                        | 0.358                          | 1340.95            | 479.43             | 0.515                          | 1125.30            | 579.35             |
| A_68_P23192160 | chr4:107356153-107356197                          | NM_019872:593          | Dmrtb1        | INSIDE                 | 1.440                                                        | 3.072                          | 768.36             | 2360.64            | 4.424                          | 691.31             | 3058.31            |
| A_68_P32320216 | chrX:34347853-34347897                            | NM_007451:12228        | Slc25a5       | DOWNSTREAM             | 1.439                                                        | 1.973                          | 251.15             | 495.48             | 2.839                          | 277.34             | 787.28             |
| A_68_P23221708 | chr4:114494316-114494360                          | NR_033617:14           | Gml2830       | INSIDE                 | 1.439                                                        | 0.288                          | 1547.23            | 445.04             | 0.414                          | 1177.50            | 487.31             |
| A_68_P22006135 | chr3:26230635-26230679                            | NM_138666:175          | Nlgn1         | INSIDE                 | 1.439                                                        | 0.360                          | 2308.93            | 830.94             | 0.518                          | 1588.70            | 822.58             |
| A_68_P21075525 | chr2:25837701-25837745                            | NM_001115076:1080      | Camsap1       | INSIDE                 | 1.439                                                        | 0.137                          | 5181.77            | 711.83             | 0.198                          | 3575.31            | 706.81             |
| A_68_P20947554 | chr1:194979527-194979571                          | NM_016851:243          | Irf6          | INSIDE                 | 1.439                                                        | 0.376                          | 3591.68            | 1352.10            | 0.542                          | 2977.07            | 1612.41            |
| A_68_P25615129 | chr8:3679115-3679119                              | NM_025701:2660         | Trappc5       | INSIDE                 | 1.438                                                        | 2.787                          | 716.41             | 1996.56            | 4.007                          | 664.95             | 2664.63            |
| A_68_P22318571 | chr3:89125906-89125950                            | NM_010108:873          | Efn3a         | INSIDE                 | 1.438                                                        | 0.306                          | 10722.21           | 3281.89            | 0.440                          | 6905.81            | 3038.75            |
| A_68_P32565868 | chrX:99044658-99044702                            | NM_001163610:-43       | Nhsl2         | PROMOTER               | 1.437                                                        | 2.733                          | 1170.32            | 3198.52            | 3.929                          | 1391.97            | 5468.53            |
| A_68_P31213957 | chr17:47873861-47873905                           | NM_001161722:-103      | Tcfefb        | PROMOTER               | 1.437                                                        | 0.316                          | 1801.82            | 569.81             | 0.454                          | 1342.94            | 610.19             |
| A_68_P2829087  | chr1:173609897-173609941                          | NM_007649:-2267        | Cd48          | PROMOTER               | 1.436                                                        | 1.632                          | 885.82             | 1445.40            | 2.342                          | 731.68             | 1713.94            |
| A_68_P20151303 | chr1:36996367-36996411                            | NM_018872:-16          | Tmem131       | PROMOTER               | 1.436                                                        | 1.598                          | 2800.54            | 4474.22            | 2.294                          | 1930.35            | 4428.46            |
| A_68_P30350127 | chr15:76540848-76540892                           | NM_058214:119          | Recql4        | INSIDE                 | 1.435                                                        | 0.380                          | 1944.42            | 738.13             | 0.545                          | 1442.06            | 785.38             |
| A_68_P28033281 | chr11:94352708-94352752                           | NM_027984:8558         | Epn3          | INSIDE                 | 1.435                                                        | 0.368                          | 2071.26            | 762.89             | 0.528                          | 1527.51            | 807.25             |
| A_68_P23226776 | chr4:115608983-115609027                          | NM_001025567:3527      | Dmbx1         | INSIDE                 | 1.435                                                        | 0.414                          | 2108.29            | 873.75             | 0.595                          | 1546.94            | 920.24             |
| A_68_P28621836 | chr12:90498827-90498871                           | NM_172544:307015       | Nrxn3         | INSIDE                 | 1.434                                                        | 1.397                          | 1192.91            | 1666.21            | 2.002                          | 880.82             | 1763.71            |
| A_68_P30970947 | chr16:92697153-92697197                           | NM_001111023:399       | Runx1         | INSIDE                 | 1.433                                                        | 0.228                          | 2946.20            | 671.98             | 0.327                          | 2008.55            | 656.30             |
| A_68_P30483165 | chr15:99803409-99803453                           | NM_001024526:220       | Larp4         | INSIDE                 | 1.433                                                        | 0.292                          | 3114.27            | 909.15             | 0.418                          | 2161.31            | 904.19             |
| A_68_P24819102 | chr6:125115139-125115183                          | NM_008084:441          | Gapdh         | INSIDE                 | 1.433                                                        | 0.440                          | 2706.78            | 1189.88            | 0.630                          | 2077.64            | 1308.50            |
| A_68_P28052175 | chr11:97560549-97560593                           | NM_001163307:128       | Pcgf2         | INSIDE                 | 1.432                                                        | 2.185                          | 297.64             | 650.34             | 3.129                          | 250.93             | 785.27             |
| A_68_P26017400 | chr8:86496806-86496851                            | NM_008854:-48          | Prkaca        | PROMOTER               | 1.432                                                        | 0.240                          | 2685.65            | 644.26             | 0.343                          | 1924.06            | 660.89             |
| A_68_P24596101 | chr6:83864271-83864315                            | NM_001166371:-54       | Zfml          | PROMOTER               | 1.432                                                        | 2.751                          | 650.79             | 1790.06            | 3.938                          | 540.18             | 2127.33            |
| A_68_P22973922 | chr4:63678515-63678559                            | NM_011607:29513        | Tnc           | INSIDE                 | 1.432                                                        | 1.878                          | 2125.58            | 3991.52            | 2.690                          | 1607.60            | 4324.41            |
| A_68_P22832217 | chr4:34663673-34663717                            | NM_027041:13761        | 1700003M02Rik | INSIDE                 | 1.432                                                        | 1.944                          | 296.21             | 575.71             | 2.783                          | 254.95             | 709.55             |
| A_68_P28457446 | chr12:57635707-57635751                           | NM_001146198:365       | Nkx2-1        | INSIDE                 | 1.431                                                        | 0.410                          | 1902.21            | 780.82             | 0.588                          | 1469.91            | 863.64             |
| A_68_P24058179 | chr5:124357031-124357075                          | NM_026603:-231         | Denr          | PROMOTER               | 1.431                                                        | 0.287                          | 2802.58            | 802.95             | 0.410                          | 2378.02            | 975.22             |
| A_68_P21840389 | chr2:168088474-168088518                          | NM_001081134:6335      | Kcng1         | INSIDE                 | 1.431                                                        | 1.943                          | 897.82             | 1744.77            | 2.780                          | 612.13             | 1701.83            |
| A_68_P31305846 | chr17:66728820-66728864                           | NM_001114098:70248     | 1110012J17Rik | INSIDE                 | 1.430                                                        | 1.397                          | 2057.48            | 2874.55            | 1.998                          | 1414.62            | 2826.30            |
| A_68_P26345767 | chr9:20969656-20969700                            | NM_183408:-479         | Pde4a         | PROMOTER               | 1.430                                                        | 0.415                          | 2231.83            | 926.82             | 0.594                          | 1651.27            | 980.46             |
| A_68_P23927132 | chr5:100407097-100407141                          | NM_001077265:839       | Hnmpd         | INSIDE                 | 1.430                                                        | 0.196                          | 3256.22            | 639.09             | 0.281                          | 2214.94            | 621.65             |
| A_68_P23358590 | chr4:140071282-140071326                          | NM_001112723:133367    | Arhgef10l     | INSIDE                 | 1.430                                                        | 1.726                          | 596.26             | 1029.16            | 2.468                          | 523.31             | 1291.72            |
| A_68_P20596874 | chr1:129670673-129670717                          | NM_028399:-46          | Ccnt2         | PROMOTER               | 1.430                                                        | 0.319                          | 3055.82            | 973.75             | 0.456                          | 2267.80            | 1033.20            |
| A_68_P31152228 | chr17:34258124-34258168                           | NR_037970:-1301        | Brd2          | PROMOTER               | 1.429                                                        | 0.207                          | 2882.30            | 596.79             | 0.296                          | 1892.76            | 559.99             |
| A_68_P23296400 | chr4:129054411-129054455                          | NM_028603:840          | Zbtb8a        | INSIDE                 | 1.429                                                        | 0.194                          | 4022.63            | 780.14             | 0.277                          | 2649.70            | 734.25             |
| A_68_P20796834 | chr1:167775041-167775085                          | NM_001113391:56251     | Cd247         | INSIDE                 | 1.429                                                        | 1.677                          | 418.03             | 701.11             | 2.397                          | 365.20             | 875.56             |
| A_68_P20352246 | chr1:75139198-75139242                            | NM_170755:-139         | Fam134a       | DIVERGENT_PROMOTER     | 1.429                                                        | 0.174                          | 3131.97            | 544.76             | 0.249                          | 2388.80            | 593.87             |
| A_68_P32375458 | chrX:48558403-48558447                            | NM_134163:585          | Mbnl3         | INSIDE                 | 1.428                                                        | 2.177                          | 406.92             | 885.95             | 3.110                          | 495.98             | 1542.51            |
| A_68_P31863849 | chr18:80559674-80559719                           | NM_001190373:1297      | Kcng2         | INSIDE                 | 1.428                                                        | 0.406                          | 2142.53            | 870.50             | 0.580                          | 1467.81            | 851.45             |
| A_68_P26022006 | chr8:87324594-87324638                            | NM_001081982:-377      | Nfix          | PROMOTER               | 1.428                                                        | 0.096                          | 5465.98            | 525.08             | 0.137                          | 3632.77            | 498.45             |
| A_68_P31632590 | chr18:38357395-38357439                           | NM_029357:12000        | Pcdh1         | INSIDE                 | 1.427                                                        | 1.638                          | 510.42             | 835.96             | 2.337                          | 466.74             | 1090.60            |
| A_68_P28040434 | chr11:95573914-95573958                           | ENSMUST00000107717:-50 |               | PROMOTER               | 1.427                                                        | 0.246                          | 1855.63            | 455.90             | 0.351                          | 1503.76            | 527.09             |
| A_68_P25278635 | chr7:89796803-89796847                            | NM_177894:214          | Fam154b       | INSIDE                 | 1.427                                                        | 0.339                          | 1362.44            | 461.37             | 0.483                          | 1140.29            | 551.00             |
| A_68_P20553863 | chr1:120734057-120734104                          | NM_001081125:216116    | Gli2          | INSIDE                 | 1.427                                                        | 1.506                          | 943.42             | 1420.38            | 0.747                          | 707.74             | 1520.02            |
| A_68_P31629193 | chr18:37829497-37829541                           | NM_033586:-4470        | Pcdhga3       | PROMOTER               | 1.426                                                        | 2.186                          | 477.10             | 1043.06            | 3.117                          | 470.25             | 1465.82            |
| A_68_P30346577 | chr15:76007094-76007138                           | NM_201394:19024        | Plec          | INSIDE                 | 1.426                                                        | 1.568                          | 659.32             | 1033.87            | 2.237                          | 503.45             | 1126.05            |
| A_68_P27949796 | chr11:79404983-79405027                           | NM_175543:291          | Rab11flp4     | INSIDE                 | 1.426                                                        | 0.321                          | 1696.61            | 545.01             | 0.458                          | 1297.82            | 594.59             |
| A_68_P22383504 | chr3:102739949-102739993                          | NM_011516:53           | Sycp1         | INSIDE                 | 1.426                                                        | 1.816                          | 418.65             | 760.33             | 2.590                          | 292.83             | 758.29             |

| ProbeName      | Target position of probe on CpG island microarray | TargetID                | GeneSymbol    | CpG island Description | Ratio of relative methylation (TiO <sub>2</sub> -NP/Vehicle) | Sham group                     |                    |                    | TiO <sub>2</sub> -H group      |                    |                    |
|----------------|---------------------------------------------------|-------------------------|---------------|------------------------|--------------------------------------------------------------|--------------------------------|--------------------|--------------------|--------------------------------|--------------------|--------------------|
|                |                                                   |                         |               |                        |                                                              | Relative methylation (Cy5/Cy3) | Cy3 signal (Input) | Cy5 signal (MeDIP) | Relative methylation (Cy5/Cy3) | Cy3 signal (Input) | Cy5 signal (MeDIP) |
| A_68_P31114337 | chr17:27250538-27250582                           | NM_080553:56312         | Itrp3         | INSIDE                 | 1.425                                                        | 1.404                          | 1180.78            | 1657.81            | 2.001                          | 1011.85            | 2024.24            |
| A_68_P28525542 | chr12:72419588-72419632                           | NM_001190466:8740       | Dact1         | INSIDE                 | 1.425                                                        | 2.764                          | 864.22             | 2388.29            | 3.938                          | 675.06             | 2658.06            |
| A_68_P28378464 | chr12:41172641-41172685                           | NM_172803:23            | Dock4         | INSIDE                 | 1.425                                                        | 2.044                          | 389.11             | 795.22             | 2.912                          | 318.82             | 928.45             |
| A_68_P27975821 | chr11:83993178-83993222                           | ENSMUST00000136463:-112 |               | PROMOTER               | 1.425                                                        | 0.420                          | 1548.49            | 650.88             | 0.599                          | 1238.66            | 741.67             |
| A_68_P24990312 | chr7:19477759-19477803                            | NM_001033314:17973      | Cede61        | INSIDE                 | 1.425                                                        | 0.289                          | 1787.16            | 516.40             | 0.412                          | 1504.23            | 619.46             |
| A_68_P22570423 | chr3:138406072-138406116                          | NM_019571:936           | Tspan5        | INSIDE                 | 1.425                                                        | 0.172                          | 5442.88            | 933.54             | 0.244                          | 3784.70            | 924.85             |
| A_68_P30778453 | chr16:55934660-55934704                           | NM_028815:279           | Cep97         | INSIDE                 | 1.424                                                        | 0.322                          | 1386.99            | 446.42             | 0.458                          | 996.15             | 456.44             |
| A_68_P30476587 | chr15:98636550-98636594                           | NM_001013741:1784       | Ddn           | INSIDE                 | 1.424                                                        | 0.395                          | 1375.76            | 543.45             | 0.563                          | 1063.82            | 598.48             |
| A_68_P25416680 | chr7:118172636-118172680                          | NM_009431:194           | Ctr9          | INSIDE                 | 1.424                                                        | 0.331                          | 2590.73            | 856.30             | 0.471                          | 1887.50            | 888.68             |
| A_68_P28566344 | chr12:79963184-79963228                           | NM_026114:148           | Eif2s1        | INSIDE                 | 1.423                                                        | 0.277                          | 1721.65            | 477.63             | 0.395                          | 1420.68            | 560.96             |
| A_68_P31256957 | chr17:56706054-56706098                           | NM_001029979:17930      | Safb2         | INSIDE                 | 1.422                                                        | 1.731                          | 501.32             | 867.57             | 2.461                          | 429.55             | 1057.04            |
| A_68_P23226466 | chr4:115563188-115563232                          | NM_001039124:6206       | Kncn          | DOWNSTREAM             | 1.422                                                        | 0.364                          | 2109.62            | 766.94             | 0.517                          | 1694.70            | 875.94             |
| A_68_P28377242 | chr12:40949783-40949827                           | NM_013562:-28           | lfrd1         | PROMOTER               | 1.421                                                        | 0.188                          | 2981.74            | 559.39             | 0.267                          | 2066.43            | 551.00             |
| A_68_P24160217 | chr5:145016703-145016747                          | NM_018772:631           | Bri3          | INSIDE                 | 1.421                                                        | 0.188                          | 3508.79            | 660.47             | 0.267                          | 2340.32            | 625.99             |
| A_68_P22150381 | chr3:54703304-54703351                            | NM_177854:16482         | 6030405A18Rik | INSIDE                 | 1.421                                                        | 1.991                          | 276.63             | 550.85             | 2.830                          | 276.43             | 782.43             |
| A_68_P21775756 | chr2:157029918-157029962                          | NM_011249:330           | Rbl1          | INSIDE                 | 1.421                                                        | 1.363                          | 1181.98            | 1611.55            | 1.937                          | 1042.53            | 2019.44            |
| A_68_P32710882 | chrX:139400446-139400490                          | NM_019496:803           | Amnecr1       | INSIDE                 | 1.420                                                        | 3.560                          | 464.43             | 1653.22            | 5.056                          | 669.31             | 3384.12            |
| A_68_P22383501 | chr3:102739596-102739640                          | NM_011516:405           | Sycp1         | INSIDE                 | 1.420                                                        | 2.247                          | 1377.48            | 3095.09            | 3.191                          | 1048.47            | 3345.46            |
| A_68_P22356139 | chr3:97555701-97555745                            | NM_178080:16215         | Pde4dip       | INSIDE                 | 1.420                                                        | 2.218                          | 847.15             | 1878.74            | 3.148                          | 694.53             | 2186.51            |
| A_68_P32092597 | chr19:36979014-36979058                           |                         |               | Unknown                | 1.419                                                        | 0.344                          | 2294.95            | 789.67             | 0.488                          | 1782.72            | 870.17             |
| A_68_P26710352 | chr9:88376001-88376047                            | NM_019796:1211          | Syncr1p       | INSIDE                 | 1.419                                                        | 0.189                          | 2385.88            | 450.80             | 0.268                          | 1758.74            | 471.49             |
| A_68_P24597191 | chr6:84055754-84055806                            | NM_021469:86398         | Dysf1         | INSIDE                 | 1.419                                                        | 2.436                          | 208.04             | 506.86             | 3.457                          | 149.71             | 517.61             |
| A_68_P31175186 | A_68_P31175186                                    |                         |               | Unknown                | 1.418                                                        | 0.405                          | 37690.54           | 15251.15           | 0.574                          | 30699.18           | 17618.32           |
| A_68_P27473559 | chr10:115551010-115551054                         | NM_001161855:-59        | 4933416C03Rik | PROMOTER               | 1.418                                                        | 2.421                          | 1826.63            | 4422.78            | 3.432                          | 1416.61            | 4862.28            |
| A_68_P25616894 | chr8:4258857-4258901                              | NM_183315:396           | Ctnx1         | INSIDE                 | 1.418                                                        | 0.403                          | 1895.86            | 763.26             | 0.571                          | 1464.72            | 836.43             |
| A_68_P22488132 | chr3:123150107-123150151                          | NM_008939:298           | Prss12        | INSIDE                 | 1.418                                                        | 0.348                          | 2053.44            | 714.21             | 0.493                          | 1668.09            | 822.80             |
| A_68_P28813939 | chr13:8995639-8995683                             | NM_027000:-402          | Gtpbp4        | PROMOTER               | 1.417                                                        | 0.299                          | 2825.72            | 844.32             | 0.423                          | 2180.33            | 923.20             |
| A_68_P23576980 | chr5:31495225-31495269                            | NM_001127355:266        | Eif2b4        | INSIDE                 | 1.417                                                        | 0.225                          | 3582.64            | 807.29             | 0.319                          | 2532.82            | 808.99             |
| A_68_P21084623 | chr2:27282256-27282300                            | NM_009500:67            | Vav2          | INSIDE                 | 1.417                                                        | 0.305                          | 3430.20            | 1046.07            | 0.432                          | 2326.50            | 1005.64            |
| A_68_P30477337 | chr15:98748179-98748223                           | NM_029098:329           | Lmbr11        | INSIDE                 | 1.415                                                        | 0.347                          | 1619.20            | 562.00             | 0.491                          | 1280.20            | 628.72             |
| A_68_P28598116 | chr12:85750091-85750135                           | NM_025525:-8037         | Rnf113a2      | PROMOTER               | 1.415                                                        | 4.869                          | 1025.26            | 4992.01            | 6.890                          | 722.02             | 4974.40            |
| A_68_P28577467 | chr12:81858507-81858551                           | NM_001008423:3174       | Gml168        | INSIDE                 | 1.415                                                        | 1.793                          | 919.69             | 1649.42            | 2.538                          | 749.79             | 1902.67            |
| A_68_P27893182 | chr11:68931694-68931738                           | NM_033041:-2238         | Hes7          | PROMOTER               | 1.415                                                        | 0.366                          | 4376.57            | 1603.33            | 0.518                          | 3102.25            | 1608.30            |
| A_68_P27176090 | chr10:60149152-60149197                           | NM_023370:10064         | Cdh23         | INSIDE                 | 1.415                                                        | 6.913                          | 243.14             | 1680.82            | 9.782                          | 242.58             | 2372.93            |
| A_68_P26221248 | chr8:123112748-123112792                          | NM_178856:205           | Gins2         | INSIDE                 | 1.415                                                        | 0.368                          | 2214.22            | 814.50             | 0.520                          | 1578.57            | 821.50             |
| A_68_P25042342 | chr7:34918494-34918538                            | NM_207212:-229          | Wtip          | PROMOTER               | 1.415                                                        | 0.213                          | 3291.79            | 702.64             | 0.302                          | 2478.07            | 748.59             |
| A_68_P24464804 | chr6:54631784-54631828                            | NM_026629:41            | 2410066E13Rik | INSIDE                 | 1.415                                                        | 0.321                          | 1521.98            | 488.84             | 0.454                          | 1260.22            | 572.58             |
| A_68_P20241449 | chr1:55419481-55419525                            | NM_001113367:49         | Boll          | INSIDE                 | 1.415                                                        | 1.458                          | 720.84             | 1050.76            | 2.063                          | 610.33             | 1258.95            |
| A_68_P25798748 | chr8:40069239-40069283                            | NM_030254:340           | Tusc3         | INSIDE                 | 1.414                                                        | 0.343                          | 1872.53            | 641.62             | 0.484                          | 1483.70            | 718.63             |
| A_68_P24620342 | chr6:88146929-88146973                            | NM_008090:-1707         | Gata2         | PROMOTER               | 1.414                                                        | 0.251                          | 2957.95            | 742.11             | 0.355                          | 2142.40            | 760.29             |
| A_68_P22303235 | chr3:86350759-86350806                            | NM_011839:1423          | Mab21l2       | INSIDE                 | 1.414                                                        | 0.298                          | 1694.67            | 505.55             | 0.422                          | 1166.10            | 491.76             |
| A_68_P21084947 | chr2:27330469-27330516                            | NM_023336:426           | Brd3          | INSIDE                 | 1.414                                                        | 0.178                          | 3844.88            | 685.71             | 0.252                          | 2448.35            | 617.34             |
| A_68_P32116953 | chr19:41818287-41818331                           | NM_015748:38            | Slit1         | INSIDE                 | 1.413                                                        | 0.217                          | 4695.96            | 1019.05            | 0.307                          | 3074.27            | 942.37             |
| A_68_P25588642 | chr7:14860091-148600135                           | NM_172116:-88           | Pdde1         | PROMOTER               | 1.413                                                        | 0.236                          | 6753.25            | 1595.21            | 0.334                          | 4541.06            | 1515.22            |
| A_68_P25393400 | chr7:112781499-112781543                          | NM_018880:493           | Trim3         | INSIDE                 | 1.413                                                        | 0.209                          | 5693.83            | 1191.30            | 0.296                          | 3483.47            | 1029.88            |
| A_68_P24118896 | chr5:136470915-136470959                          | NM_023742:190           | Dtx2          | INSIDE                 | 1.413                                                        | 0.352                          | 2939.46            | 1033.54            | 0.497                          | 2270.19            | 1127.99            |
| A_68_P21073109 | chr2:25435334-25435378                            | NM_001005424:263        | Gm996         | INSIDE                 | 1.413                                                        | 0.284                          | 2218.96            | 629.77             | 0.401                          | 1557.98            | 624.82             |
| A_68_P31116776 | chr17:27640013-27640058                           | NM_001013385:214        | Gm4           | INSIDE                 | 1.412                                                        | 1.871                          | 298.01             | 557.68             | 2.642                          | 276.98             | 731.85             |
| A_68_P30514884 | chr16:5307097-5307141                             |                         |               | Unknown                | 1.412                                                        | 0.350                          | 2271.66            | 793.99             | 0.494                          | 1693.98            | 836.19             |
| A_68_P25951937 | chr8:72976378-72976422                            | NM_001122830:24442      | Klhl26        | INSIDE                 | 1.412                                                        | 1.775                          | 443.80             | 787.84             | 2.507                          | 402.96             | 1010.39            |
| A_68_P27877787 | chr11:66338783-66338827                           | NM_001034874:824        | Shisa6        | INSIDE                 | 1.411                                                        | 0.395                          | 2282.10            | 900.72             | 0.557                          | 1682.38            | 937.15             |
| A_68_P21731904 | chr2:148557983-148558027                          | NM_019632:152           | Napb          | INSIDE                 | 1.411                                                        | 0.229                          | 3548.62            | 813.64             | 0.323                          | 2559.38            | 827.85             |
| A_68_P26400215 | chr9:31193897-31193941                            | NM_172766:142           | Nfrkb         | INSIDE                 | 1.410                                                        | 2.701                          | 6751.91            | 18237.79           | 3.808                          | 4733.50            | 18025.78           |
| A_68_P24397786 | chr6:42300193-42300237                            | NM_011777:388           | Zyx           | INSIDE                 | 1.410                                                        | 0.189                          | 3068.13            | 579.50             | 0.266                          | 2299.43            | 612.19             |
| A_68_P22893527 | chr4:47258362-47258406                            | NM_009928:37501         | Col15a1       | INSIDE                 | 1.410                                                        | 1.783                          | 725.16             | 1292.65            | 2.513                          | 473.16             | 1189.22            |
| A_68_P25279963 | chr7:90017868-90017912                            | NM_175366:2048          | Mex3b         | INSIDE                 | 1.409                                                        | 0.422                          | 1539.82            | 650.13             | 0.595                          | 1212.98            | 721.80             |
| A_68_P22609989 | chr3:145316674-145316720                          | NM_010516:-3747         | Cyr61         | PROMOTER               | 1.409                                                        | 1.612                          | 600.54             | 968.14             | 2.271                          | 492.94             | 1119.42            |
| A_68_P21102110 | chr2:30111958-30112002                            | NM_177725:18692         | Lrrc8a        | INSIDE                 | 1.409                                                        | 1.448                          | 1685.82            | 2441.76            | 2.041                          | 964.84             | 1969.17            |
| A_68_P20939668 | chr1:193542953-193542997                          | NM_001134829:701        | Lpgat1        | INSIDE                 | 1.409                                                        | 0.320                          | 1526.07            | 488.57             | 0.451                          | 1165.14            | 525.71             |
| A_68_P28748395 | chr12:113413871-113413915                         | NM_001097621:29474      | Kif26a        | INSIDE                 | 1.408                                                        | 1.492                          | 675.08             | 1007.22            | 2.101                          | 507.92             | 1067.18            |
| A_68_P28730242 | chr12:110074008-110074052                         | NM_181328:56            | Slc25a29      | INSIDE                 | 1.408                                                        | 0.375                          | 1549.96            | 581.95             | 0.528                          | 1143.89            | 604.50             |
| A_68_P23185610 | chr4:106311623-106311667                          | NM_177667:16591         | Ttc22         | INSIDE                 | 1.408                                                        | 1.781                          | 1536.53            | 2736.86            | 2.508                          | 1177.51            | 2953.43            |
| A_68_P26821061 | chr9:109834270-109834314                          | NM_001205331:15         | Mtap4         | INSIDE                 | 1.407                                                        | 0.391                          | 1220.29            | 476.85             | 0.550                          | 1016.15            | 558.84             |
| A_68_P31305847 | chr17:66728898-66728942                           | NM_001114098:70170      | 1110012J17Rik | INSIDE                 | 1.406                                                        | 1.528                          | 1625.87            | 2484.28            | 2.148                          | 1174.71            | 2522.77            |
| A_68_P30086027 | chr15:26239002-26239046                           | NM_177597:198           | Marchf11      | INSIDE                 | 1.406                                                        | 0.331                          | 2691.83            | 890.37             | 0.465                          | 1853.82            | 862.16             |

| ProbeName      | Target position of probe on CpG island microarray | TargetID                 | GeneSymbol    | CpG island Description | Ratio of relative methylation (TiO <sub>2</sub> -NP/Vehicle) | Sham group                     |                    |                    | TiO <sub>2</sub> -H group      |                    |                    |
|----------------|---------------------------------------------------|--------------------------|---------------|------------------------|--------------------------------------------------------------|--------------------------------|--------------------|--------------------|--------------------------------|--------------------|--------------------|
|                |                                                   |                          |               |                        |                                                              | Relative methylation (Cy5/Cy3) | Cy3 signal (Input) | Cy5 signal (MeDIP) | Relative methylation (Cy5/Cy3) | Cy3 signal (Input) | Cy5 signal (MeDIP) |
| A_68_P24120336 | chr5:136750661-136750705                          | NM_198602:292593         | Cux1          | INSIDE                 | 1.406                                                        | 2.200                          | 501.35             | 1103.08            | 3.093                          | 525.68             | 1626.06            |
| A_68_P21835385 | chr2:167247037-167247081                          | NM_148929:-162           | Slc9a8        | PROMOTER               | 1.406                                                        | 0.279                          | 2101.19            | 585.79             | 0.392                          | 1484.86            | 582.20             |
| A_68_P31620879 | chr18:36078772-36078816                           | AK021191:6009            |               | DOWNSTREAM             | 1.405                                                        | 0.327                          | 1362.31            | 445.37             | 0.459                          | 1060.52            | 487.11             |
| A_68_P24377210 | chr6:38383835-38383879                            | NM_177185:-68            | Ubn2          | PROMOTER               | 1.405                                                        | 2.165                          | 297.56             | 644.12             | 3.042                          | 223.10             | 678.60             |
| A_68_P23997436 | chr5:113739937-113739981                          | NM_172718:-152           | Sgsm1         | PROMOTER               | 1.405                                                        | 0.355                          | 1261.83            | 447.93             | 0.499                          | 984.60             | 490.94             |
| A_68_P23438939 | chr4:154865343-154865387                          | NM_001160016:-105        | Gnb1          | PROMOTER               | 1.405                                                        | 0.262                          | 1883.24            | 492.98             | 0.368                          | 1523.79            | 560.43             |
| A_68_P23145554 | chr4:99323682-99323726                            | NM_010425:715            | Foxd3         | INSIDE                 | 1.405                                                        | 0.212                          | 3328.80            | 706.05             | 0.298                          | 2333.35            | 695.32             |
| A_68_P28313703 | chr12:29237082-29237126                           | NM_001177964:-3902       | Dcdc2c        | PROMOTER               | 1.404                                                        | 1.474                          | 676.69             | 997.33             | 2.069                          | 542.34             | 1121.94            |
| A_68_P25957926 | chr8:74152893-74152939                            | NM_001029873:42740       | Unc13a        | INSIDE                 | 1.404                                                        | 2.051                          | 264.99             | 543.58             | 2.879                          | 198.00             | 570.06             |
| A_68_P32536864 | chrX:91226158-91226202                            | NR_028320:12186          | AU015836      | DOWNSTREAM             | 1.403                                                        | 2.416                          | 332.30             | 802.69             | 3.388                          | 498.64             | 1689.30            |
| A_68_P22059402 | chr3:36570442-36570486                            | NM_019510:18625          | Trpc3         | INSIDE                 | 1.403                                                        | 1.730                          | 1228.45            | 2125.02            | 2.427                          | 1001.33            | 2430.30            |
| A_68_P20058116 | chr1:17081618-17081662                            | NM_020604:6330           | Jph1          | INSIDE                 | 1.403                                                        | 1.905                          | 902.12             | 1718.20            | 2.673                          | 758.57             | 2027.57            |
| A_68_P25499765 | chr7:133435758-133435803                          | NM_145587:19648          | Sbk1          | INSIDE                 | 1.402                                                        | 1.828                          | 542.37             | 991.71             | 2.564                          | 494.97             | 1269.02            |
| A_68_P23615699 | chr5:38212879-38212923                            | NR_027920:1098           | Msx1as        | INSIDE                 | 1.402                                                        | 0.328                          | 2189.25            | 718.43             | 0.460                          | 1614.75            | 743.07             |
| A_68_P32140286 | chr19:45824101-45824145                           | NM_008723:-69            | Npm3          | PROMOTER               | 1.401                                                        | 1.342                          | 2157.87            | 2895.47            | 1.880                          | 1853.71            | 3485.59            |
| A_68_P30423733 | chr15:89011473-89011517                           | NM_138749:-276           | Plxn2         | PROMOTER               | 1.401                                                        | 0.330                          | 1703.53            | 562.35             | 0.463                          | 1284.82            | 594.25             |
| A_68_P20087503 | chr1:23263704-23263748                            | ENSMUST0000097807:-481   |               | PROMOTER               | 1.401                                                        | 0.365                          | 2293.07            | 835.97             | 0.511                          | 1973.38            | 1007.83            |
| A_68_P29675223 | chr14:66349464-66349508                           | NM_001168318:64247       | Scara5        | INSIDE                 | 1.400                                                        | 1.688                          | 500.10             | 844.34             | 2.364                          | 348.46             | 823.67             |
| A_68_P25361263 | chr7:106497545-106497589                          | NM_001111043:4183        | Serpinh1      | INSIDE                 | 1.400                                                        | 1.630                          | 620.22             | 1011.20            | 2.283                          | 533.03             | 1216.93            |
| A_68_P24904259 | chr6:142336167-142336211                          | NM_025872:426            | Golt1b        | INSIDE                 | 1.400                                                        | 0.293                          | 1653.62            | 484.15             | 0.410                          | 1256.65            | 515.24             |
| A_68_P31886106 | chr18:84257584-84257628                           | NM_146090:57             | Zadhl2        | INSIDE                 | 1.399                                                        | 0.158                          | 3050.58            | 482.20             | 0.221                          | 2257.76            | 499.25             |
| A_68_P30479873 | chr15:99223693-99223737                           | NM_001171035:65          | Tmbim6        | INSIDE                 | 1.399                                                        | 0.221                          | 2733.32            | 603.87             | 0.309                          | 2225.08            | 687.81             |
| A_68_P30447287 | chr15:93333954-93333998                           | NM_001033217:92346       | Prickle1      | INSIDE                 | 1.399                                                        | 3.033                          | 772.52             | 2343.24            | 4.243                          | 650.04             | 2757.93            |
| A_68_P27392942 | chr10:100051680-100051724                         | NM_175128:191            | 4930430F08Rik | Unknown                | 1.399                                                        | 0.385                          | 1516.06            | 583.26             | 0.538                          | 1224.22            | 659.06             |
| A_68_P23266750 | chr4:123856175-123856229                          |                          |               | Unknown                | 1.399                                                        | 0.275                          | 2033.73            | 559.45             | 0.385                          | 1423.97            | 548.10             |
| A_68_P23154898 | chr4:101092046-101092090                          | NM_009647:-239           | Ak4           | PROMOTER               | 1.399                                                        | 0.447                          | 1917.86            | 857.90             | 0.626                          | 1472.35            | 921.47             |
| A_68_P20560373 | chr1:122017586-122017630                          | NM_001037999:-112        | Dbi           | PROMOTER               | 1.399                                                        | 0.177                          | 3532.97            | 625.55             | 0.248                          | 2346.33            | 581.08             |
| A_68_P28575258 | chr12:81440823-81440867                           | NM_177267:96744          | Deaf5         | INSIDE                 | 1.398                                                        | 1.494                          | 576.80             | 861.94             | 2.089                          | 518.63             | 1083.67            |
| A_68_P25435185 | chr7:121419707-121419751                          | NM_011965:-98            | Psmal1        | PROMOTER               | 1.398                                                        | 0.314                          | 3069.76            | 962.79             | 0.438                          | 2304.30            | 1010.20            |
| A_68_P21901050 | chr2:179777293-179777337                          | NM_178750:127            | Ss18l1        | INSIDE                 | 1.398                                                        | 0.187                          | 2324.83            | 434.76             | 0.262                          | 1638.91            | 428.60             |
| A_68_P33015615 | chr1_random:49917-49962                           | NM_026866:135399         | Disp1         | INSIDE                 | 1.397                                                        | 1.959                          | 225.29             | 441.30             | 2.737                          | 220.67             | 603.88             |
| A_68_P25008200 | chr7:25857700-25857744                            | NM_008168:-334           | Grik5         | DIVERGENT_PROMOTER     | 1.397                                                        | 0.388                          | 2298.77            | 892.26             | 0.542                          | 1685.73            | 914.05             |
| A_68_P20066615 | chr1:19200195-19200239                            | NM_001025305:-1918       | Tcfap2b       | PROMOTER               | 1.397                                                        | 0.395                          | 1537.08            | 606.60             | 0.551                          | 1258.67            | 693.87             |
| A_68_P31351304 | chr17:74794846-74794890                           | NM_144798:-103           | Slc30a6       | PROMOTER               | 1.396                                                        | 0.396                          | 1187.56            | 470.14             | 0.553                          | 937.41             | 518.17             |
| A_68_P31125954 | chr17:29235470-29235514                           | NM_007669:4776           | Cdkn1a        | INSIDE                 | 1.396                                                        | 1.605                          | 433.05             | 694.83             | 2.241                          | 398.24             | 892.34             |
| A_68_P27709960 | chr11:35821756-35821800                           | NM_011856:935967         | Od22          | INSIDE                 | 1.396                                                        | 2.172                          | 821.55             | 1784.24            | 3.031                          | 655.42             | 1986.51            |
| A_68_P20149760 | chr1:36739833-36739877                            | NM_001126046:174         | Fam178b       | INSIDE                 | 1.396                                                        | 1.964                          | 1379.93            | 2710.09            | 2.742                          | 1221.80            | 3349.91            |
| A_68_P28032110 | chr11:94183065-94183109                           | NM_026313:139            | Luc7l3        | INSIDE                 | 1.395                                                        | 0.362                          | 1634.60            | 591.22             | 0.505                          | 1080.90            | 545.37             |
| A_68_P26400213 | chr9:31193594-31193638                            | NM_172766:-160           | Nfkb          | PROMOTER               | 1.395                                                        | 0.387                          | 1812.91            | 701.65             | 0.540                          | 1460.95            | 788.52             |
| A_68_P26345697 | chr9:20954349-20954393                            | NM_016742:-20            | Cdc37         | PROMOTER               | 1.395                                                        | 0.351                          | 1276.81            | 448.68             | 0.490                          | 1063.56            | 521.53             |
| A_68_P25708739 | chr8:23123882-23123926                            | NM_007511:46642          | Atp7b         | INSIDE                 | 1.395                                                        | 1.544                          | 1027.15            | 1585.93            | 2.153                          | 804.97             | 1733.22            |
| A_68_P24397656 | chr6:42274272-42274316                            | NM_001113327:345         | Fam131b       | INSIDE                 | 1.395                                                        | 0.283                          | 1654.51            | 468.37             | 0.395                          | 1127.97            | 445.46             |
| A_68_P27287199 | chr10:80532582-80532627                           | NM_022653:-223           | Thop1         | DIVERGENT_PROMOTER     | 1.394                                                        | 3.812                          | 175.73             | 669.89             | 5.316                          | 153.88             | 817.98             |
| A_68_P24001850 | chr5:114541225-114541269                          | NM_026805:143            | Svop          | INSIDE                 | 1.393                                                        | 2.244                          | 556.87             | 1249.81            | 3.126                          | 381.86             | 1193.78            |
| A_68_P23417961 | chr4:151689896-151689940                          | NM_001033489:2816        | Rn207         | INSIDE                 | 1.393                                                        | 0.291                          | 1520.86            | 443.27             | 0.406                          | 963.97             | 391.40             |
| A_68_P23226957 | chr4:115635357-115635401                          | ENSMUST00000125761:54902 |               | DOWNSTREAM             | 1.393                                                        | 0.206                          | 2444.91            | 502.89             | 0.287                          | 1714.56            | 491.40             |
| A_68_P23212280 | chr4:111392824-111392869                          | NM_026470:232            | Spta6         | INSIDE                 | 1.393                                                        | 0.231                          | 2077.25            | 480.09             | 0.322                          | 1753.16            | 564.36             |
| A_68_P31251408 | chr17:55621977-55622021                           | NM_172829:36984          | Stgal2        | INSIDE                 | 1.392                                                        | 1.978                          | 860.05             | 1700.90            | 2.753                          | 769.03             | 2117.40            |
| A_68_P30633252 | chr16:28929399-28929443                           | NM_177718:364            | 600021P15Rik  | INSIDE                 | 1.392                                                        | 0.193                          | 3429.05            | 663.19             | 0.269                          | 2441.79            | 657.49             |
| A_68_P27222449 | chr10:68675460-68675504                           | NM_001081347:78          | Rhobtb1       | INSIDE                 | 1.392                                                        | 0.304                          | 1523.06            | 462.71             | 0.423                          | 1225.33            | 518.16             |
| A_68_P24511775 | chr6:65331286-65331330                            | NM_175524:21             | C130060K24Rik | INSIDE                 | 1.392                                                        | 0.260                          | 2263.10            | 588.36             | 0.362                          | 1772.42            | 641.27             |
| A_68_P25957040 | chr8:74005621-74005665                            | NM_001164679:4324        | Ano8          | INSIDE                 | 1.391                                                        | 2.842                          | 1616.20            | 4593.17            | 3.954                          | 1209.94            | 4784.17            |
| A_68_P23416685 | chr4:151500131-151500175                          | NM_019585:2882           | Esn           | INSIDE                 | 1.391                                                        | 1.392                          | 1695.58            | 2360.44            | 1.936                          | 1180.44            | 2285.52            |
| A_68_P28748413 | chr12:113416336-113416380                         | NM_001097621:31940       | Kif26a        | INSIDE                 | 1.390                                                        | 1.804                          | 1786.95            | 3224.36            | 2.508                          | 1385.30            | 3474.33            |
| A_68_P26853659 | chr9:116084433-116084477                          | NM_009371:27             | Tgfb2         | INSIDE                 | 1.390                                                        | 0.212                          | 3617.62            | 767.01             | 0.295                          | 2386.30            | 703.09             |
| A_68_P24129051 | chr5:138596643-138596687                          | NM_019747:308            | Zfp113        | INSIDE                 | 1.390                                                        | 0.330                          | 1920.15            | 634.36             | 0.459                          | 1334.93            | 612.91             |
| A_68_P30083238 | chr15:25711367-25711411                           | NM_019472:159084         | Myo10         | INSIDE                 | 1.389                                                        | 1.508                          | 1078.74            | 1626.25            | 2.094                          | 982.36             | 2057.15            |
| A_68_P29288689 | chr13:104900121-104900165                         | NM_144838:273            | Sgfb          | INSIDE                 | 1.389                                                        | 0.229                          | 3480.75            | 798.17             | 0.318                          | 2396.32            | 762.99             |
| A_68_P27901894 | chr11:70467828-70467872                           | NM_011072:302            | Pfn1          | INSIDE                 | 1.389                                                        | 0.404                          | 1663.38            | 672.11             | 0.561                          | 1237.11            | 694.49             |
| A_68_P26320797 | chr9:14849991-14850035                            | NM_019482:-90            | Panx1         | PROMOTER               | 1.389                                                        | 0.410                          | 1370.09            | 561.59             | 0.569                          | 1130.76            | 643.61             |
| A_68_P25023458 | chr7:29551865-29551909                            | NM_001122765:116         | Sirt2         | INSIDE                 | 1.389                                                        | 0.385                          | 1690.71            | 651.51             | 0.535                          | 1402.52            | 750.61             |
| A_68_P24763847 | chr6:114081056-114081100                          | NM_172890:-156           | Slc6a11       | PROMOTER               | 1.389                                                        | 0.454                          | 1603.73            | 728.88             | 0.631                          | 1291.71            | 815.31             |
| A_68_P28457439 | chr12:57634754-57634798                           | NM_001146198:1317        | Nkx2-1        | INSIDE                 | 1.388                                                        | 0.232                          | 1882.13            | 436.56             | 0.322                          | 1251.29            | 402.81             |
| A_68_P22336393 | chr3:93247754-93247798                            | NM_001163098:1525        | Tchh          | INSIDE                 | 1.388                                                        | 1.862                          | 630.24             | 1173.79            | 2.585                          | 498.01             | 1287.51            |
| A_68_P20935551 | chr1:192803342-192803386                          | NR_027352:-189           | Vash2         | PROMOTER               | 1.388                                                        | 2.770                          | 1230.90            | 3410.13            | 3.844                          | 945.61             | 3635.38            |

| ProbeName      | Target position of probe on CpG island microarray | TargetID               | GeneSymbol    | CpG island Description | Ratio of relative methylation (TiO <sub>2</sub> -NP/Vehicle) | Sham group                     |                    |                    | TiO <sub>2</sub> -H group      |                    |                    |
|----------------|---------------------------------------------------|------------------------|---------------|------------------------|--------------------------------------------------------------|--------------------------------|--------------------|--------------------|--------------------------------|--------------------|--------------------|
|                |                                                   |                        |               |                        |                                                              | Relative methylation (Cy5/Cy3) | Cy3 signal (Input) | Cy5 signal (MeDIP) | Relative methylation (Cy5/Cy3) | Cy3 signal (Input) | Cy5 signal (MeDIP) |
| A_68_P31932936 | chr19:6141162-6141206                             | NM_019722:47           | Arl2          | PROMOTER               | 1.387                                                        | 1.398                          | 936.91             | 1310.17            | 1.940                          | 678.40             | 1316.16            |
| A_68_P30141816 | chr15:36937216-36937260                           | NM_026521:81           | Zfp706        | PROMOTER               | 1.387                                                        | 0.295                          | 2733.18            | 807.16             | 0.410                          | 1821.13            | 745.80             |
| A_68_P29477473 | chr14:26277283-26277327                           | NM_183208:1366         | Zmiz1         | PROMOTER               | 1.387                                                        | 0.405                          | 1232.68            | 499.37             | 0.562                          | 969.37             | 544.67             |
| A_68_P27094094 | chr10:41997864-41997908                           | NM_019740:1338         | Foxo3         | PROMOTER               | 1.387                                                        | 0.361                          | 1399.66            | 505.63             | 0.501                          | 1032.09            | 517.32             |
| A_68_P26142834 | chr8:109572130-109572174                          | NM_026513:362          | Pdf           | INSIDE                 | 1.387                                                        | 0.238                          | 2802.17            | 665.89             | 0.330                          | 1916.22            | 631.76             |
| A_68_P22522345 | chr3:129533741-129533785                          | NM_026578:552          | Gar1          | INSIDE                 | 1.387                                                        | 0.198                          | 2336.91            | 462.94             | 0.275                          | 1812.06            | 498.04             |
| A_68_P29773647 | chr14:84846157-84846201                           | NM_001013753:2809      | Pcdh17        | INSIDE                 | 1.386                                                        | 0.360                          | 3217.20            | 1159.35            | 0.499                          | 2469.15            | 1233.03            |
| A_68_P25031174 | chr7:31140698-31140742                            | NM_175478:7071         | Lrnf3         | INSIDE                 | 1.386                                                        | 1.559                          | 573.40             | 893.92             | 2.160                          | 487.10             | 1052.33            |
| A_68_P24819777 | chr6:125236044-125236088                          | NM_009446:6            | Tuba3a        | PROMOTER               | 1.386                                                        | 1.674                          | 789.67             | 1321.93            | 2.320                          | 718.75             | 1667.29            |
| A_68_P22871974 | chr4:43506583-43506627                            | NM_001037913:368       | Ccdc107       | INSIDE                 | 1.386                                                        | 0.268                          | 1658.08            | 444.53             | 0.371                          | 1198.89            | 445.37             |
| A_68_P21084946 | chr2:27330392-27330443                            | NM_023336:501          | Brd3          | INSIDE                 | 1.386                                                        | 0.348                          | 1478.52            | 514.68             | 0.482                          | 1058.25            | 510.42             |
| A_68_P30588528 | chr16:20620501-20620545                           | NM_028420:829          | Camk2n2       | INSIDE                 | 1.385                                                        | 0.259                          | 3531.41            | 916.20             | 0.359                          | 2305.63            | 828.49             |
| A_68_P27897804 | chr11:69714837-69714881                           | NM_027419:370          | 2810408A11Rik | DIVERGENT_PROMOTER     | 1.385                                                        | 0.185                          | 2872.10            | 532.22             | 0.257                          | 2036.60            | 522.69             |
| A_68_P27287002 | chr10:80494365-80494409                           | NM_134135:2271         | Slc39a3       | INSIDE                 | 1.385                                                        | 1.578                          | 1506.25            | 2377.32            | 2.187                          | 1054.94            | 2306.88            |
| A_68_P25025265 | chr7:29870930-29870974                            | NR_035489:2239         | Mir1963       | PROMOTER               | 1.385                                                        | 1.986                          | 679.00             | 1348.77            | 2.752                          | 551.46             | 1517.72            |
| A_68_P22060449 | chr3:36762158-36762202                            | NM_172679:153          | 4932438A13Rik | INSIDE                 | 1.385                                                        | 0.157                          | 3898.93            | 611.85             | 0.217                          | 2825.36            | 614.28             |
| A_68_P21906911 | chr2:180629180-180629224                          | NR_029358:458          | Mir124a-3     | DOWNSTREAM             | 1.385                                                        | 0.228                          | 2929.01            | 669.21             | 0.316                          | 2277.48            | 720.44             |
| A_68_P20455838 | chr1:95375093-95375137                            | NM_133808:271          | Hdlbp         | INSIDE                 | 1.385                                                        | 0.369                          | 1597.96            | 588.88             | 0.510                          | 1326.68            | 677.12             |
| A_68_P27172912 | chr10:59648749-59648793                           | NM_016803:33238        | Chst3         | INSIDE                 | 1.384                                                        | 1.754                          | 2305.55            | 4042.85            | 2.428                          | 1927.57            | 4679.31            |
| A_68_P25090466 | chr7:52241494-52241538                            | NM_019830:186          | Pmt1          | INSIDE                 | 1.384                                                        | 0.299                          | 2489.30            | 744.64             | 0.414                          | 1648.05            | 682.15             |
| A_68_P24151266 | chr5:142843739-142843783                          |                        |               | Unknown                | 1.384                                                        | 1.694                          | 613.20             | 1038.48            | 2.344                          | 505.37             | 1184.54            |
| A_68_P24055190 | chr5:123795453-123795497                          | NM_029850:1018         | Bcl7a         | INSIDE                 | 1.384                                                        | 0.349                          | 2532.98            | 885.05             | 0.483                          | 1848.18            | 893.53             |
| A_68_P27489859 | chr10:118677390-118677434                         | NM_027994:301          | Cand1         | PROMOTER               | 1.383                                                        | 1.567                          | 577.95             | 905.51             | 2.166                          | 418.53             | 906.61             |
| A_68_P27493131 | chr6:119390505-119390549                          | NM_009525:103839       | Wnt5b         | INSIDE                 | 1.382                                                        | 1.592                          | 1111.57            | 1769.34            | 2.199                          | 893.46             | 1965.11            |
| A_68_P21428050 | chr2:92210966-92211010                            | NM_001166633:205       | Gylt1b        | INSIDE                 | 1.382                                                        | 0.318                          | 1659.65            | 527.06             | 0.439                          | 1266.00            | 555.60             |
| A_68_P31412119 | chr17:86087840-86087884                           | NM_011380:268          | Six2          | PROMOTER               | 1.381                                                        | 1.751                          | 705.61             | 1235.27            | 2.417                          | 561.32             | 1356.87            |
| A_68_P24170389 | chr5:147656737-147656781                          | NM_026864:112          | Rasl11a       | INSIDE                 | 1.381                                                        | 0.397                          | 1403.34            | 556.43             | 0.547                          | 1121.23            | 613.86             |
| A_68_P27940380 | chr11:77744288-77744332                           | NM_021286:134          | Sez6          | DIVERGENT_PROMOTER     | 1.380                                                        | 0.222                          | 2858.55            | 633.45             | 0.306                          | 1963.67            | 600.40             |
| A_68_P30403120 | chr15:85641984-85642028                           | NM_001164625:121       | 2210021J22Rik | INSIDE                 | 1.379                                                        | 0.223                          | 2909.95            | 648.25             | 0.307                          | 2071.91            | 636.60             |
| A_68_P29554799 | chr14:40287043-40287087                           | NM_001190187:688       | Nrg3          | PROMOTER               | 1.379                                                        | 0.398                          | 1625.88            | 647.49             | 0.549                          | 1126.15            | 618.32             |
| A_68_P28043947 | chr11:96205604-96205648                           | NM_010458:544          | Hoxb3         | INSIDE                 | 1.379                                                        | 0.190                          | 2592.18            | 493.52             | 0.262                          | 1894.32            | 497.24             |
| A_68_P22314994 | chr3:88448009-88448053                            | NM_001198912:22715     | Arhgef2       | INSIDE                 | 1.379                                                        | 1.931                          | 1148.33            | 2217.22            | 2.662                          | 862.53             | 2296.39            |
| A_68_P32678565 | chrX:132420534-132420578                          | NM_001098222:167       | Bhlhb9        | INSIDE                 | 1.378                                                        | 2.106                          | 993.88             | 2093.14            | 2.902                          | 1337.70            | 3881.82            |
| A_68_P30579428 | chr16:18393075-18393119                           | NM_033474:44730        | Arvcf         | INSIDE                 | 1.378                                                        | 0.397                          | 1739.04            | 691.19             | 0.548                          | 1250.46            | 685.05             |
| A_68_P30480288 | chr15:99288482-99288527                           | NM_001001884:325       | Nckap5l       | PROMOTER               | 1.378                                                        | 2.655                          | 278.04             | 738.11             | 3.659                          | 244.86             | 895.96             |
| A_68_P27649724 | chr11:24064291-24064335                           | NM_001159290:83618     | Bcl11a        | INSIDE                 | 1.378                                                        | 1.917                          | 504.26             | 966.87             | 2.641                          | 427.79             | 1129.91            |
| A_68_P28452658 | chr12:56700808-56700852                           | NM_020287:927          | Insm2         | INSIDE                 | 1.377                                                        | 1.670                          | 411.50             | 687.05             | 2.299                          | 348.83             | 802.04             |
| A_68_P22683294 | chr3:157699823-157699867                          | NM_024194:178          | Lrrc40        | INSIDE                 | 1.377                                                        | 0.210                          | 2752.62            | 576.94             | 0.289                          | 2179.50            | 629.10             |
| A_68_P30346617 | chr15:76012075-76012119                           | NM_201394:14044        | Plec          | INSIDE                 | 1.376                                                        | 1.766                          | 1115.55            | 1969.79            | 2.430                          | 756.49             | 1837.97            |
| A_68_P28731505 | chr12:110272292-110272336                         | NM_001163175:34113     | Begain        | INSIDE                 | 1.376                                                        | 1.807                          | 806.58             | 1457.81            | 2.487                          | 717.92             | 1785.63            |
| A_68_P28356086 | chr12:36768656-36768700                           | NM_025359:387          | Tspan13       | INSIDE                 | 1.376                                                        | 0.164                          | 4490.16            | 737.74             | 0.226                          | 3548.70            | 802.53             |
| A_68_P28047897 | chr11:96838592-96838636                           | NM_001080964:388       | Sp2           | INSIDE                 | 1.376                                                        | 3.819                          | 1142.33            | 4363.08            | 5.254                          | 884.56             | 4647.34            |
| A_68_P23985682 | chr5:111849354-111849398                          | NM_001081235:2191      | Mn1           | INSIDE                 | 1.376                                                        | 1.842                          | 860.04             | 1584.08            | 2.534                          | 679.27             | 1721.45            |
| A_68_P32099207 | chr19:38129688-38129732                           | NM_001164362:179       | Cep55         | INSIDE                 | 1.375                                                        | 0.421                          | 1845.82            | 776.97             | 0.579                          | 1446.49            | 837.46             |
| A_68_P26805312 | chr9:106725024-106725068                          | NM_001015507:740       | Vprbp         | INSIDE                 | 1.375                                                        | 0.280                          | 1972.49            | 553.14             | 0.386                          | 1587.71            | 612.32             |
| A_68_P25958570 | chr8:74249375-74249419                            | NM_028715:184          | Fcho1         | INSIDE                 | 1.375                                                        | 0.420                          | 3429.75            | 1440.80            | 0.578                          | 2593.09            | 1498.26            |
| A_68_P28956456 | chr13:37870834-37870878                           | ENSMUST00000122842:588 |               | INSIDE                 | 1.374                                                        | 0.254                          | 1910.09            | 485.21             | 0.349                          | 1393.14            | 486.20             |
| A_68_P27291023 | chr10:81105955-81106002                           | NM_027480:14694        | Ankrd24       | INSIDE                 | 1.374                                                        | 0.321                          | 1411.89            | 452.65             | 0.441                          | 1109.82            | 488.95             |
| A_68_P26631268 | chr9:72951661-72951705                            | NM_025890:1478         | 2410004A20Rik | INSIDE                 | 1.374                                                        | 1.935                          | 454.13             | 878.54             | 2.658                          | 410.23             | 1090.45            |
| A_68_P22061573 | chr3:36962572-36962616                            | NM_009350:17           | Adad1         | INSIDE                 | 1.374                                                        | 1.898                          | 669.61             | 1270.72            | 2.607                          | 553.69             | 1443.31            |
| A_68_P32111689 | chr19:40969301-40969345                           | NM_028319:128          | Zfp518a       | INSIDE                 | 1.373                                                        | 0.293                          | 2355.05            | 689.55             | 0.402                          | 1709.13            | 686.87             |
| A_68_P31161346 | chr17:35998590-35998640                           | NM_134122:352          | Nrm           | INSIDE                 | 1.373                                                        | 0.236                          | 2993.81            | 706.39             | 0.324                          | 1917.04            | 621.10             |
| A_68_P30673613 | chr16:36071461-36071505                           | NM_027342:119          | Fam162a       | INSIDE                 | 1.373                                                        | 0.177                          | 3588.75            | 635.58             | 0.243                          | 2652.58            | 645.01             |
| A_68_P25171969 | chr7:70590173-70590217                            | NM_130880:537          | Outd7a        | INSIDE                 | 1.373                                                        | 0.253                          | 2097.41            | 529.64             | 0.347                          | 1706.34            | 591.63             |
| A_68_P24155561 | chr5:143997211-143997255                          | NM_177681:346          | Zfp12         | INSIDE                 | 1.373                                                        | 0.303                          | 2939.86            | 892.02             | 0.416                          | 2119.23            | 882.65             |
| A_68_P22314351 | chr3:88340661-88340705                            | NR_035434:378          | Mir1905       | PROMOTER               | 1.373                                                        | 0.405                          | 2190.98            | 887.32             | 0.556                          | 1585.61            | 881.79             |
| A_68_P20842584 | chr1:176431990-176432034                          | NM_019445:57           | Fmn2          | INSIDE                 | 1.373                                                        | 0.320                          | 2238.51            | 715.48             | 0.439                          | 1820.32            | 799.09             |
| A_68_P32132940 | chr19:44629409-44629454                           | NM_026061:474          | Ndufb8        | INSIDE                 | 1.372                                                        | 0.392                          | 4500.37            | 1765.05            | 0.538                          | 3036.93            | 1634.35            |
| A_68_P26787844 | chr9:103663476-103663520                          | NM_178638:669          | Tmem108       | INSIDE                 | 1.372                                                        | 4.657                          | 2174.50            | 10126.10           | 6.389                          | 1535.28            | 9809.06            |
| A_68_P24639210 | chr6:91423696-91423740                            | NM_028766:26           | Tmem43        | DIVERGENT_PROMOTER     | 1.372                                                        | 2.190                          | 1086.00            | 2378.87            | 3.005                          | 839.32             | 2522.53            |
| A_68_P24466344 | chr6:54894258-54894302                            | NM_001171007:27375     | Nod1          | INSIDE                 | 1.372                                                        | 1.576                          | 928.53             | 1463.03            | 2.161                          | 727.74             | 1572.76            |
| A_68_P27804076 | chr11:53113307-53113351                           | NM_008300:653          | Hspa4         | INSIDE                 | 1.370                                                        | 0.317                          | 1593.77            | 504.99             | 0.434                          | 1353.88            | 587.65             |
| A_68_P25761249 | chr8:33119399-33119443                            | ENSMUST00000080782:161 |               | INSIDE                 | 1.370                                                        | 0.493                          | 3400.45            | 1676.37            | 0.675                          | 2487.43            | 1679.72            |
| A_68_P25457393 | chr7:125387260-125387304                          | NM_001031814:131       | Smg1          | DIVERGENT_PROMOTER     | 1.370                                                        | 1.355                          | 2326.44            | 3151.82            | 1.856                          | 1389.27            | 2578.93            |
| A_68_P23298636 | chr4:129497126-129497170                          | NM_008974:574          | Ptp4a2        | PROMOTER               | 1.370                                                        | 1.419                          | 2042.79            | 2899.52            | 1.944                          | 1543.98            | 3001.92            |

| ProbeName      | Target position of probe on CpG island microarray | TargetID                | GeneSymbol    | CpG island Description | Ratio of relative methylation (TiO <sub>2</sub> -NP/Vehicle) | Sham group                     |                    |                    | TiO <sub>2</sub> -H group      |                    |                    |
|----------------|---------------------------------------------------|-------------------------|---------------|------------------------|--------------------------------------------------------------|--------------------------------|--------------------|--------------------|--------------------------------|--------------------|--------------------|
|                |                                                   |                         |               |                        |                                                              | Relative methylation (Cy5/Cy3) | Cy3 signal (Input) | Cy5 signal (MeDIP) | Relative methylation (Cy5/Cy3) | Cy3 signal (Input) | Cy5 signal (MeDIP) |
| A_68_P31755198 | chr18:61195223-61195267                           | NM_009880:609           | Cdx1          | INSIDE                 | 1.369                                                        | 1.883                          | 457.32             | 860.98             | 2.577                          | 414.65             | 1068.64            |
| A_68_P29249639 | chr13:97908050-97908094                           | NM_177266:181           | Gfm2          | INSIDE                 | 1.369                                                        | 0.261                          | 1774.08            | 462.51             | 0.357                          | 1242.89            | 443.64             |
| A_68_P27968102 | chr11:82578176-82578220                           | NM_025884:352           | Zfp830        | INSIDE                 | 1.369                                                        | 0.220                          | 3085.32            | 678.84             | 0.301                          | 2148.93            | 647.44             |
| A_68_P23627553 | chr5:40035844-40035888                            | NM_010474:4             | Hs3st1        | INSIDE                 | 1.369                                                        | 0.398                          | 1842.07            | 733.31             | 0.545                          | 1285.84            | 700.60             |
| A_68_P22778505 | chr4:22414595-22414639                            | NM_008899:662           | Pou3f2        | INSIDE                 | 1.369                                                        | 0.270                          | 5014.99            | 1356.55            | 0.370                          | 3398.24            | 1258.09            |
| A_68_P29671483 | chr14:65695129-65695173                           | NM_018788:21793         | Extl3         | INSIDE                 | 1.368                                                        | 1.500                          | 964.60             | 1446.62            | 2.052                          | 787.30             | 1615.67            |
| A_68_P28728198 | chr12:109701817-109701861                         | NM_001043335:40813      | Eml1          | INSIDE                 | 1.368                                                        | 1.937                          | 608.07             | 1178.07            | 2.650                          | 551.37             | 1461.07            |
| A_68_P27502790 | chr10:120747317-120747361                         | NM_029057:907           | Tbc1d30       | INSIDE                 | 1.368                                                        | 0.257                          | 5948.50            | 1527.90            | 0.351                          | 3760.39            | 1321.46            |
| A_68_P23837532 | chr5:81450776-81450820                            | NM_198702:181           | Lphn3         | INSIDE                 | 1.368                                                        | 0.283                          | 1702.24            | 482.25             | 0.387                          | 1169.93            | 453.27             |
| A_68_P21309980 | chr2:69424250-69424294                            | NM_001081088:-148       | Lrp2          | PROMOTER               | 1.368                                                        | 0.209                          | 3217.77            | 673.09             | 0.286                          | 2332.30            | 667.32             |
| A_68_P27480106 | chr10:116661162-116661206                         | NM_026570:379           | Yeats4        | INSIDE                 | 1.367                                                        | 0.235                          | 1993.45            | 468.93             | 0.322                          | 1463.33            | 470.60             |
| A_68_P26022272 | chr8:87370728-87370772                            | NM_007591:80            | Calr          | INSIDE                 | 1.367                                                        | 0.149                          | 5417.33            | 806.28             | 0.203                          | 3548.25            | 722.03             |
| A_68_P24761383 | chr6:113708921-113708965                          | NM_001036684:132428     | Atp2b2        | INSIDE                 | 1.367                                                        | 1.443                          | 696.52             | 1005.08            | 1.973                          | 567.45             | 1119.74            |
| A_68_P32111334 | chr19:40906541-40906585                           | NM_172839:794           | Ccnj          | INSIDE                 | 1.366                                                        | 0.285                          | 1924.96            | 548.73             | 0.389                          | 1393.97            | 542.89             |
| A_68_P29645530 | chr14:61253653-61253697                           | NM_001033272:109        | Spata13       | INSIDE                 | 1.366                                                        | 0.437                          | 2159.18            | 943.06             | 0.596                          | 1678.97            | 1001.44            |
| A_68_P28084316 | chr11:103128366-103128410                         | NM_016896:327           | Map3k14       | INSIDE                 | 1.366                                                        | 0.244                          | 2551.88            | 621.46             | 0.333                          | 1858.34            | 618.05             |
| A_68_P27581769 | chr11:9050712-9050764                             | ENSMUST00000121861:-138 |               | PROMOTER               | 1.366                                                        | 2.374                          | 282.29             | 670.26             | 3.243                          | 247.72             | 803.40             |
| A_68_P22449312 | chr3:116126248-116126292                          | NM_001080818:680        | Cdc14a        | INSIDE                 | 1.366                                                        | 0.272                          | 2269.81            | 617.91             | 0.372                          | 1692.99            | 629.52             |
| A_68_P22336424 | chr3:93251272-93251316                            | NM_001163098:5043       | Tchh          | INSIDE                 | 1.366                                                        | 0.303                          | 2062.99            | 624.51             | 0.413                          | 1687.53            | 697.70             |
| A_68_P30752013 | chr16:50529490-50529534                           | ENSMUST00000150937:898  |               | INSIDE                 | 1.365                                                        | 0.400                          | 1139.83            | 455.37             | 0.545                          | 926.36             | 505.32             |
| A_68_P30472484 | chr15:97835084-97835128                           | NM_001113515:49         | Col2a1        | INSIDE                 | 1.365                                                        | 0.358                          | 1476.14            | 528.50             | 0.489                          | 1112.69            | 543.60             |
| A_68_P30279146 | chr15:63891463-63891507                           | NM_144846:526           | Fam49b        | INSIDE                 | 1.365                                                        | 0.299                          | 1479.26            | 442.41             | 0.408                          | 1195.67            | 488.16             |
| A_68_P25950069 | chr8:72663704-72663748                            | NM_001145552:115        | 2310045N01Rik | INSIDE                 | 1.365                                                        | 0.261                          | 2619.04            | 683.94             | 0.356                          | 1744.60            | 621.94             |
| A_68_P29626124 | chr14:57723397-57723441                           | NM_008125:121           | Gjb2          | INSIDE                 | 1.364                                                        | 0.454                          | 1560.28            | 708.94             | 0.620                          | 1199.08            | 743.39             |
| A_68_P31152955 | chr17:34402022-34402066                           | NM_207105:1873          | H2-Ab1        | INSIDE                 | 1.363                                                        | 0.298                          | 4790.83            | 1427.92            | 0.406                          | 3642.90            | 1480.01            |
| A_68_P28736924 | chr12:111427791-111427835                         | AK044800:2027           |               | INSIDE                 | 1.363                                                        | 0.422                          | 1113.82            | 470.36             | 0.576                          | 981.50             | 564.99             |
| A_68_P25499763 | chr7:133435519-133435563                          | NM_145587:19408         | Sbk1          | INSIDE                 | 1.363                                                        | 1.937                          | 1354.46            | 2622.97            | 2.640                          | 947.53             | 2501.15            |
| A_68_P22157975 | chr3:55986717-55986761                            | NM_030595:885           | Nbea          | INSIDE                 | 1.363                                                        | 0.281                          | 1819.35            | 512.12             | 0.384                          | 1358.62            | 521.40             |
| A_68_P23327636 | chr4:134828309-134828353                          | NM_013885:345           | Clic4         | INSIDE                 | 1.362                                                        | 0.431                          | 1625.17            | 699.73             | 0.586                          | 1384.59            | 811.88             |
| A_68_P22310776 | chr3:87733936-87733980                            | NM_153562:159           | Rmad1         | INSIDE                 | 1.362                                                        | 0.125                          | 3662.01            | 458.81             | 0.171                          | 2538.02            | 433.25             |
| A_68_P31983174 | chr19:17030658-17030702                           | NM_181348:73            | Prunc2        | INSIDE                 | 1.361                                                        | 0.517                          | 4041.20            | 2088.08            | 0.703                          | 2910.48            | 2046.39            |
| A_68_P29051304 | chr13:54867489-54867533                           | NM_033610:291           | Sncb          | INSIDE                 | 1.361                                                        | 0.428                          | 1884.67            | 805.85             | 0.582                          | 1415.37            | 823.90             |
| A_68_P28091681 | chr11:104432890-104432934                         | NM_010858:20936         | My14          | INSIDE                 | 1.361                                                        | 0.199                          | 3193.22            | 637.01             | 0.272                          | 2460.07            | 668.13             |
| A_68_P27954278 | chr11:80242652-80242696                           | NM_178616:558           | Psmd11        | INSIDE                 | 1.361                                                        | 0.229                          | 2162.85            | 495.37             | 0.312                          | 1676.19            | 522.32             |
| A_68_P22509730 | chr3:127336734-127336778                          | NM_009718:694           | Neurog2       | INSIDE                 | 1.361                                                        | 5.205                          | 1071.80            | 5578.23            | 7.083                          | 993.35             | 7036.16            |
| A_68_P31487556 | chr18:9957739-9957784                             | NM_153552:-416          | Thoc1         | PROMOTER               | 1.360                                                        | 1.667                          | 514.93             | 858.36             | 2.266                          | 449.85             | 1019.49            |
| A_68_P30602964 | A_68_P30602964                                    |                         |               | Unknown                | 1.360                                                        | 2.585                          | 585.29             | 1512.88            | 3.516                          | 475.97             | 1673.49            |
| A_68_P29054896 | chr13:55516436-55516480                           | NM_029303:135           | Pfn3          | INSIDE                 | 1.360                                                        | 0.274                          | 2253.89            | 617.13             | 0.372                          | 1614.02            | 601.14             |
| A_68_P28104644 | chr11:106860905-106860949                         | NM_010655:-87           | Kpna2         | PROMOTER               | 1.360                                                        | 1.775                          | 347.18             | 616.38             | 2.415                          | 308.63             | 745.32             |
| A_68_P21835856 | chr2:167329663-167329708                          | NM_030743:11541         | Rnfl14        | INSIDE                 | 1.360                                                        | 0.275                          | 1783.23            | 490.21             | 0.374                          | 1150.76            | 430.14             |
| A_68_P31117189 | chr17:27702653-27702697                           | NM_001002895:-2         | AI413582      | PROMOTER               | 1.359                                                        | 0.377                          | 1491.64            | 562.08             | 0.512                          | 1202.06            | 615.72             |
| A_68_P26171282 | chr8:114516157-114516201                          | NM_013925:24            | Adat1         | INSIDE                 | 1.359                                                        | 0.409                          | 1322.61            | 541.39             | 0.556                          | 994.08             | 553.12             |
| A_68_P33015613 | chr1_random:49705-49759                           | NM_026866:135606        | Disp1         | INSIDE                 | 1.358                                                        | 1.737                          | 568.35             | 987.13             | 2.358                          | 499.11             | 1176.91            |
| A_68_P30879835 | chr16:75593202-75593246                           | NM_198302:89            | Rbml1         | INSIDE                 | 1.358                                                        | 0.382                          | 1173.58            | 448.35             | 0.519                          | 928.04             | 481.53             |
| A_68_P26802099 | chr9:106150157-106150201                          | NM_020559:107           | Alas1         | INSIDE                 | 1.358                                                        | 0.409                          | 1778.84            | 726.90             | 0.555                          | 1285.60            | 713.36             |
| A_68_P25357075 | chr7:105804717-105804761                          | NM_172280:341           | 2210018M1Rik  | INSIDE                 | 1.358                                                        | 1.632                          | 1109.67            | 1811.05            | 2.217                          | 855.68             | 1896.70            |
| A_68_P23656661 | chr5:45841349-45841393                            | NM_024236:98            | Qdpr          | INSIDE                 | 1.358                                                        | 0.329                          | 1491.20            | 490.78             | 0.447                          | 1121.66            | 501.35             |
| A_68_P21835087 | chr2:167174410-167174454                          | NM_019835:246           | B4gal15       | INSIDE                 | 1.358                                                        | 0.433                          | 1767.67            | 765.32             | 0.588                          | 1235.50            | 726.18             |
| A_68_P30751463 | chr16:50432288-50432332                           | NM_027444:192           | Bbx           | INSIDE                 | 1.357                                                        | 2.643                          | 409.47             | 1082.28            | 3.587                          | 306.97             | 1101.19            |
| A_68_P27141570 | chr10:53018974-53019019                           | NM_001204983:80661      | Gm9766        | INSIDE                 | 1.357                                                        | 1.617                          | 472.54             | 764.32             | 2.195                          | 409.98             | 900.08             |
| A_68_P26772687 | chr9:100978284-100978328                          | NM_001100451:-144       | Ms12          | PROMOTER               | 1.357                                                        | 2.990                          | 1149.27            | 3436.21            | 4.059                          | 696.46             | 2826.67            |
| A_68_P25048201 | chr7:35989266-35989310                            | NM_001024707:11076      | Lrp3          | INSIDE                 | 1.357                                                        | 2.280                          | 930.93             | 2122.37            | 3.093                          | 694.60             | 2148.61            |
| A_68_P24428223 | chr6:48547614-48547658                            | NM_001079901:3755       | Repin1        | INSIDE                 | 1.357                                                        | 3.042                          | 1077.72            | 3278.41            | 4.128                          | 957.10             | 3950.99            |
| A_68_P21121521 | chr2:33286475-33286519                            | NM_001085507:348        | Zbtb34        | INSIDE                 | 1.357                                                        | 0.365                          | 1222.38            | 446.24             | 0.495                          | 998.50             | 494.63             |
| A_68_P29161996 | chr13:78302959-78303003                           | NM_001163419:455030     | Fam172a       | INSIDE                 | 1.356                                                        | 0.310                          | 1424.72            | 441.96             | 0.421                          | 1046.69            | 440.33             |
| A_68_P23244925 | chr4:118992833-118992877                          | NM_028677:274           | Ppih          | INSIDE                 | 1.356                                                        | 0.307                          | 1795.96            | 552.14             | 0.417                          | 1322.75            | 551.45             |
| A_68_P23196910 | chr4:108292768-108292812                          | NM_177045:230           | Ce2d1b        | INSIDE                 | 1.356                                                        | 0.338                          | 4497.10            | 1518.03            | 0.458                          | 3305.37            | 1512.71            |
| A_68_P31661524 | chr18:43597803-43597847                           | ENSMUST00000121805:116  |               | INSIDE                 | 1.355                                                        | 0.423                          | 1276.93            | 540.08             | 0.573                          | 1070.12            | 613.31             |
| A_68_P28149599 | chr11:114626559-114626603                         | NM_001102615:-122       | Kif19a        | PROMOTER               | 1.355                                                        | 0.470                          | 2333.32            | 1096.51            | 0.637                          | 1828.20            | 1164.15            |
| A_68_P24383682 | chr6:39507280-39507324                            | NM_172477:531           | Dennd2a       | INSIDE                 | 1.355                                                        | 0.438                          | 3038.79            | 1330.64            | 0.593                          | 2239.09            | 1328.67            |
| A_68_P23417688 | chr4:151654062-151654106                          | NM_178406:5614          | Prr153        | INSIDE                 | 1.355                                                        | 1.545                          | 1198.09            | 1850.71            | 2.094                          | 869.88             | 1821.25            |
| A_68_P23364639 | chr4:141092925-141092969                          | NM_019763:1566          | Spen          | INSIDE                 | 1.355                                                        | 0.386                          | 1174.04            | 453.74             | 0.524                          | 907.65             | 475.19             |
| A_68_P22356140 | chr3:97555778-97555823                            | NM_178080:16137         | Pde4dip       | INSIDE                 | 1.355                                                        | 2.401                          | 620.70             | 1490.59            | 3.254                          | 554.26             | 1803.67            |
| A_68_P23617865 | chr5:38550138-38550182                            | NM_010942:546           | Nsg1          | INSIDE                 | 1.354                                                        | 0.129                          | 4685.43            | 605.45             | 0.175                          | 3091.84            | 541.01             |
| A_68_P29241522 | chr13:96374151-96374199                           | NM_010169:14214         | F2r           | INSIDE                 | 1.353                                                        | 2.386                          | 775.93             | 1851.20            | 3.228                          | 656.51             | 2119.16            |

| ProbeName      | Target position of probe on CpG island microarray | TargetID                | GeneSymbol    | CpG island Description | Ratio of relative methylation (TiO <sub>2</sub> -NP/Vehicle) | Sham group                     |                    |                    | TiO <sub>2</sub> -H group      |                    |                    |
|----------------|---------------------------------------------------|-------------------------|---------------|------------------------|--------------------------------------------------------------|--------------------------------|--------------------|--------------------|--------------------------------|--------------------|--------------------|
|                |                                                   |                         |               |                        |                                                              | Relative methylation (Cy5/Cy3) | Cy3 signal (Input) | Cy5 signal (MeDIP) | Relative methylation (Cy5/Cy3) | Cy3 signal (Input) | Cy5 signal (MeDIP) |
| A_68_P28940417 | chr13:34839281-34839325                           | NM_138746:7792          | Fam50b        | INSIDE                 | 1.353                                                        | 2.415                          | 1218.09            | 2941.09            | 3.268                          | 936.08             | 3059.08            |
| A_68_P28035934 | chr11:94854133-94854177                           | NM_172261:1629          | Ppp1r9b       | INSIDE                 | 1.353                                                        | 0.471                          | 3820.58            | 1798.95            | 0.637                          | 2865.07            | 1825.38            |
| A_68_P24591679 | chr6:83092501-83092545                            | NM_009106:5445          | Rtkn          | INSIDE                 | 1.353                                                        | 0.429                          | 2749.62            | 1178.83            | 0.580                          | 1872.00            | 1086.14            |
| A_68_P32318066 | chrX:33868905-33868949                            | NM_028894:523           | Lomr3         | INSIDE                 | 1.352                                                        | 2.763                          | 252.26             | 697.10             | 3.736                          | 334.76             | 1250.78            |
| A_68_P27096133 | chr10:42399029-42399073                           | NM_172416:329           | Ostm1         | INSIDE                 | 1.352                                                        | 1.536                          | 1038.91            | 1596.16            | 2.078                          | 836.30             | 1737.63            |
| A_68_P26519508 | chr9:53056259-53056305                            | NM_029936:-65           | Ddx10         | PROMOTER               | 1.352                                                        | 0.184                          | 2581.63            | 474.49             | 0.248                          | 1671.26            | 415.23             |
| A_68_P24994776 | chr7:20282146-20282190                            | NM_009696:2347          | Apoe          | INSIDE                 | 1.352                                                        | 2.736                          | 745.00             | 2038.43            | 3.700                          | 641.29             | 2372.65            |
| A_68_P24135225 | chr5:139856460-139856504                          | NM_030258:-138          | Gpr146        | PROMOTER               | 1.352                                                        | 0.356                          | 1613.36            | 573.70             | 0.481                          | 1163.64            | 559.63             |
| A_68_P23694282 | chr5:52759804-52759848                            | NM_011435:4784          | Sod3          | INSIDE                 | 1.352                                                        | 1.588                          | 568.62             | 902.82             | 2.147                          | 478.72             | 1027.65            |
| A_68_P28593011 | chr12:84827402-84827446                           | NM_058212:1234          | Dpf3          | INSIDE                 | 1.350                                                        | 0.072                          | 8389.48            | 600.92             | 0.097                          | 5223.75            | 505.09             |
| A_68_P26232281 | chr8:124805601-124805645                          | NM_009569:-418          | Zfpml         | PROMOTER               | 1.350                                                        | 1.502                          | 5122.77            | 7695.11            | 2.028                          | 3049.58            | 6184.94            |
| A_68_P31930503 | chr19:5731362-5731406                             | NM_020491:337           | Ssca1         | INSIDE                 | 1.349                                                        | 0.287                          | 2087.81            | 599.56             | 0.387                          | 1488.41            | 576.49             |
| A_68_P29113347 | chr13:69137713-69137757                           | NM_153534:685           | Adecy2        | INSIDE                 | 1.349                                                        | 0.285                          | 3396.58            | 969.00             | 0.385                          | 2665.48            | 1026.00            |
| A_68_P24467400 | chr6:55067624-55067668                            | NM_009953:15320         | Chr2r         | INSIDE                 | 1.349                                                        | 0.235                          | 2646.36            | 620.64             | 0.316                          | 2012.68            | 636.63             |
| A_68_P24206536 | chr6:4697665-4697715                              | NM_001040611:385        | Pegl0         | INSIDE                 | 1.349                                                        | 1.684                          | 432.60             | 728.64             | 2.272                          | 398.12             | 904.53             |
| A_68_P28513104 | chr12:70259759-70259803                           | NM_009093:393           | Rps29         | INSIDE                 | 1.348                                                        | 0.391                          | 1483.00            | 580.19             | 0.527                          | 1090.29            | 574.85             |
| A_68_P28307257 | chr12:28026632-28026676                           | NM_009234:929           | Sox11         | INSIDE                 | 1.348                                                        | 2.042                          | 1733.87            | 3540.26            | 2.752                          | 1449.66            | 3990.13            |
| A_68_P24595551 | chr6:83745218-83745262                            | NM_001164187:89         | Nagk          | INSIDE                 | 1.348                                                        | 0.162                          | 6956.80            | 1126.72            | 0.218                          | 4385.47            | 957.53             |
| A_68_P22892656 | chr4:47104671-47104715                            | NM_172693:-132          | Galnt12       | PROMOTER               | 1.348                                                        | 0.237                          | 3387.92            | 801.36             | 0.319                          | 2444.43            | 779.26             |
| A_68_P28221292 | chr12:8305005-8305049                             | NM_013527:3734          | Gdf7          | INSIDE                 | 1.347                                                        | 0.164                          | 3003.05            | 492.93             | 0.221                          | 2007.26            | 443.77             |
| A_68_P20941835 | chr1:193960556-193960600                          | NR_033536:-201          | Gml0516       | PROMOTER               | 1.347                                                        | 0.395                          | 1763.48            | 697.25             | 0.532                          | 1305.32            | 695.05             |
| A_68_P31927966 | chr19:5307193-5307237                             | NM_001024717:8884       | Gal3st3       | INSIDE                 | 1.346                                                        | 1.642                          | 1188.23            | 1951.06            | 2.210                          | 866.90             | 1915.82            |
| A_68_P31402644 | chr17:84496087-84496131                           | AK043195:-103           |               | PROMOTER               | 1.346                                                        | 0.279                          | 2357.91            | 658.03             | 0.376                          | 1841.96            | 691.80             |
| A_68_P31304340 | chr17:66460894-66460938                           | NM_001037757:-68        | ORF19         | PROMOTER               | 1.346                                                        | 0.458                          | 1546.65            | 707.72             | 0.616                          | 1215.25            | 748.36             |
| A_68_P30015972 | chr15:11313703-11313747                           | NM_033074:15689         | Tars          | INSIDE                 | 1.346                                                        | 1.638                          | 1225.31            | 2007.66            | 2.205                          | 1038.16            | 2289.30            |
| A_68_P25585260 | chr7:148041975-148042019                          | NM_018742:286           | Bet1l         | INSIDE                 | 1.346                                                        | 0.331                          | 1687.30            | 558.80             | 0.446                          | 1253.90            | 558.85             |
| A_68_P24059409 | chr5:124571234-124571278                          | NM_011256:95171         | Pitpnm2       | INSIDE                 | 1.346                                                        | 2.190                          | 688.90             | 1508.92            | 2.948                          | 514.37             | 1516.57            |
| A_68_P27826626 | chr11:57458476-57458520                           | NM_134189:-445          | Galnt10       | PROMOTER               | 1.345                                                        | 0.347                          | 1424.90            | 494.34             | 0.467                          | 1062.72            | 495.82             |
| A_68_P20553864 | chr1:120734165-120734209                          | NM_001081125:216010     | Gli2          | INSIDE                 | 1.345                                                        | 1.961                          | 930.33             | 1824.23            | 2.638                          | 791.43             | 2087.67            |
| A_68_P32240058 | chrX:7339999-7340043                              | NM_001105196:234        | Tcf3          | INSIDE                 | 1.344                                                        | 1.585                          | 492.98             | 781.48             | 2.131                          | 540.24             | 1151.06            |
| A_68_P31207758 | chr17:46728606-46728650                           | NM_175168:37825         | Pik7          | INSIDE                 | 1.344                                                        | 1.942                          | 1043.91            | 2027.37            | 2.610                          | 833.43             | 2175.10            |
| A_68_P30665796 | chr16:34745100-34745144                           | ENSMUST00000155268:-173 |               | PROMOTER               | 1.344                                                        | 3.162                          | 300.17             | 949.05             | 4.251                          | 292.22             | 1242.09            |
| A_68_P27261659 | chr10:75837873-75837917                           | NM_008787:67763         | Pcnt          | INSIDE                 | 1.344                                                        | 2.530                          | 215.69             | 545.71             | 3.399                          | 205.76             | 699.48             |
| A_68_P26818264 | chr9:108997741-108997785                          | NM_172775:-187          | Plxnb1        | PROMOTER               | 1.344                                                        | 1.885                          | 556.69             | 1049.62            | 2.535                          | 433.03             | 1097.60            |
| A_68_P25083571 | chr7:50930445-50930489                            | NM_145582:3066          | Ctu1          | INSIDE                 | 1.344                                                        | 2.462                          | 800.78             | 1971.64            | 3.310                          | 493.13             | 1632.23            |
| A_68_P25022019 | chr7:29244304-29244350                            | NM_001141921:7070       | Lrfln1        | INSIDE                 | 1.344                                                        | 1.488                          | 810.56             | 1205.95            | 1.999                          | 683.67             | 1366.93            |
| A_68_P32749011 | chrX:148776892-148776936                          | NM_029836:113           | Tspyl2        | INSIDE                 | 1.343                                                        | 0.303                          | 2056.57            | 623.31             | 0.407                          | 2711.86            | 1103.60            |
| A_68_P31254139 | chr17:56278984-56279028                           | NM_013662:-5731         | Sema6b        | PROMOTER               | 1.343                                                        | 0.271                          | 2667.27            | 723.68             | 0.364                          | 1917.33            | 698.39             |
| A_68_P30961946 | chr16:91270379-91270423                           | NM_016968:387           | Olig1         | INSIDE                 | 1.343                                                        | 1.429                          | 3045.18            | 4351.91            | 1.919                          | 2309.55            | 4432.08            |
| A_68_P29060392 | chr13:56397929-56397973                           | NM_019568:-38           | Cxcl14        | PROMOTER               | 1.343                                                        | 2.123                          | 14903.11           | 31645.12           | 2.851                          | 9661.94            | 27547.52           |
| A_68_P26595475 | chr9:66683088-66683132                            | NM_026674:-597          | Aph1c         | PROMOTER               | 1.343                                                        | 0.196                          | 3328.17            | 651.23             | 0.263                          | 2468.06            | 648.79             |
| A_68_P25362046 | chr7:106617483-106617527                          | NM_028145:2991          | Klhl35        | INSIDE                 | 1.343                                                        | 6.042                          | 483.64             | 2922.08            | 8.114                          | 430.35             | 3491.94            |
| A_68_P22729550 | chr4:11314133-11314177                            | NM_194055:-224          | Esrp1         | PROMOTER               | 1.343                                                        | 0.200                          | 3701.99            | 740.02             | 0.268                          | 2997.41            | 804.64             |
| A_68_P21221950 | chr2:52717844-52717888                            | NM_172409:965           | Fmnl2         | INSIDE                 | 1.343                                                        | 0.422                          | 1709.26            | 721.25             | 0.567                          | 1368.24            | 775.52             |
| A_68_P26466977 | chr9:44127873-44127917                            | NM_027909:471           | C2cd2l        | INSIDE                 | 1.342                                                        | 0.430                          | 4350.60            | 1871.12            | 0.577                          | 3002.60            | 1732.57            |
| A_68_P24136132 | chr5:140016559-140016603                          | NM_013702:-3271         | Gnrx          | PROMOTER               | 1.342                                                        | 0.328                          | 2745.59            | 899.60             | 0.440                          | 1988.93            | 874.83             |
| A_68_P30332045 | chr15:73526210-73526254                           | NM_173365:11703         | Upr20         | INSIDE                 | 1.341                                                        | 1.534                          | 2360.67            | 3621.55            | 2.057                          | 1712.03            | 3521.81            |
| A_68_P24828616 | chr6:126689917-126689961                          | NM_013568:754           | Kcna6         | INSIDE                 | 1.341                                                        | 0.357                          | 1553.53            | 554.26             | 0.478                          | 1131.44            | 541.38             |
| A_68_P24828013 | chr6:126594315-126594359                          | NM_010595:1483          | Kcna1         | INSIDE                 | 1.341                                                        | 0.342                          | 2061.46            | 704.72             | 0.458                          | 1544.52            | 708.07             |
| A_68_P21817648 | chr2:164230100-164230144                          | NM_013592:-8            | Matn4         | PROMOTER               | 1.341                                                        | 0.297                          | 2244.98            | 666.48             | 0.398                          | 1709.65            | 680.45             |
| A_68_P20880195 | chr1:183141802-183141846                          | NM_145514:285           | Wdr26         | INSIDE                 | 1.341                                                        | 3.743                          | 2174.89            | 8140.83            | 5.019                          | 1616.27            | 8111.24            |
| A_68_P32217858 | chr19:59268636-59268680                           |                         |               | Unknown                | 1.340                                                        | 0.343                          | 2421.10            | 830.68             | 0.460                          | 1757.01            | 807.54             |
| A_68_P29484662 | chr14:27852087-27852131                           | NM_134437:-78           | Il17rd        | PROMOTER               | 1.340                                                        | 0.244                          | 2002.55            | 488.15             | 0.327                          | 1452.38            | 474.45             |
| A_68_P27285769 | chr10:80298722-80298766                           | NM_001013758:8040       | Lingo3        | INSIDE                 | 1.340                                                        | 1.983                          | 1219.52            | 2418.83            | 2.658                          | 901.37             | 2395.61            |
| A_68_P25031430 | chr7:31206709-31206753                            | NM_172142:-1592         | Nfkbid        | DIVERGENT_PROMOTER     | 1.340                                                        | 1.931                          | 312.53             | 603.45             | 2.588                          | 253.29             | 655.58             |
| A_68_P32698229 | chrX:136813030-136813074                          | ENSMUST00000130153:-651 |               | PROMOTER               | 1.339                                                        | 0.302                          | 2143.64            | 646.91             | 0.404                          | 2796.66            | 1129.90            |
| A_68_P32397421 | chrX:53985333-53985377                            | NM_001077361:221        | Fhl1          | INSIDE                 | 1.339                                                        | 1.697                          | 586.25             | 994.61             | 2.271                          | 725.04             | 1646.46            |
| A_68_P30346591 | chr15:76008957-76009001                           | NM_201394:17162         | Plec          | INSIDE                 | 1.339                                                        | 1.849                          | 867.28             | 1603.84            | 2.477                          | 664.33             | 1645.32            |
| A_68_P25586497 | chr7:148254408-148254452                          | NM_177897:7258          | B4galnt4      | INSIDE                 | 1.339                                                        | 1.951                          | 403.93             | 788.00             | 2.612                          | 325.49             | 850.13             |
| A_68_P23074276 | chr4:85160312-85160356                            | ENSMUST00000147066:104  |               | INSIDE                 | 1.339                                                        | 0.280                          | 1627.98            | 456.41             | 0.375                          | 1338.27            | 502.45             |
| A_68_P32147505 | chr19:47149484-47149530                           | NM_177342:7269          | Taf5          | INSIDE                 | 1.338                                                        | 1.946                          | 266.87             | 519.42             | 2.604                          | 245.24             | 638.65             |
| A_68_P26164569 | chr8:113262564-113262608                          | NM_198625:17203         | Mtss1l        | INSIDE                 | 1.338                                                        | 2.191                          | 337.98             | 740.35             | 2.932                          | 335.20             | 982.67             |
| A_68_P26144744 | chr8:109948750-109948794                          | NM_026277:166           | Nob1          | INSIDE                 | 1.338                                                        | 0.363                          | 1537.35            | 558.82             | 0.486                          | 1284.35            | 624.49             |
| A_68_P24618848 | chr6:87863953-87863997                            | NM_173737:-5            | 8430410A17Rik | INSIDE                 | 1.338                                                        | 0.192                          | 2328.73            | 447.35             | 0.257                          | 1956.76            | 503.06             |
| A_68_P22862463 | chr4:41445595-41445641                            | NM_00108515:4491        | AI464131      | INSIDE                 | 1.337                                                        | 0.377                          | 2265.64            | 853.92             | 0.504                          | 1509.91            | 761.11             |

| ProbeName      | Target position of probe on CpG island microarray | TargetID                 | GeneSymbol    | CpG island Description | Ratio of relative methylation (TiO <sub>2</sub> -NP/Vehicle) | Sham group                     |                    |                    | TiO <sub>2</sub> -H group      |                    |                    |
|----------------|---------------------------------------------------|--------------------------|---------------|------------------------|--------------------------------------------------------------|--------------------------------|--------------------|--------------------|--------------------------------|--------------------|--------------------|
|                |                                                   |                          |               |                        |                                                              | Relative methylation (Cy5/Cy3) | Cy3 signal (Input) | Cy5 signal (MeDIP) | Relative methylation (Cy5/Cy3) | Cy3 signal (Input) | Cy5 signal (MeDIP) |
| A_68_P22412513 | chr3:108215712-108215756                          | NM_001004177:2678        | Celsr2        | INSIDE                 | 1.337                                                        | 2.188                          | 920.60             | 2014.50            | 2.926                          | 772.27             | 2259.77            |
| A_68_P22151536 | chr3:54916119-54916163                            | NM_001144987:53          | Spg20         | INSIDE                 | 1.337                                                        | 0.405                          | 1483.94            | 601.12             | 0.541                          | 1217.30            | 659.14             |
| A_68_P12121053 | chr2:52531826-52531870                            | NM_001037099:253         | Cacnb4        | INSIDE                 | 1.337                                                        | 0.390                          | 1585.58            | 617.60             | 0.521                          | 1156.23            | 602.11             |
| A_68_P20793342 | chr1:167124624-167124668                          | NM_145512:-82            | Sfr2d2        | PROMOTER               | 1.337                                                        | 0.368                          | 1550.94            | 571.12             | 0.492                          | 1233.21            | 607.23             |
| A_68_P31126969 | chr17:29401134-29401178                           | NM_026845:-240           | Ppil1         | DIVERGENT_PROMOTER     | 1.336                                                        | 13.017                         | 805.72             | 10487.86           | 17.387                         | 859.18             | 14938.59           |
| A_68_P30979318 | chr16:94085768-94085812                           | NM_011377:286            | Sim2          | INSIDE                 | 1.336                                                        | 0.319                          | 1531.90            | 489.36             | 0.427                          | 1031.81            | 440.48             |
| A_68_P27473557 | chr10:115550809-115550853                         | NM_001161855:143         | 4933416C03Rik | INSIDE                 | 1.336                                                        | 1.800                          | 927.69             | 1670.12            | 2.405                          | 836.44             | 2011.26            |
| A_68_P25016961 | chr7:28152919-28152968                            | NM_001199235:26582       | Spm4          | INSIDE                 | 1.336                                                        | 3.431                          | 790.96             | 2713.69            | 4.584                          | 603.28             | 2765.21            |
| A_68_P23931758 | chr5:101275769-101275813                          | NM_127215:543            | Agnat9        | INSIDE                 | 1.336                                                        | 0.348                          | 1425.83            | 496.33             | 0.465                          | 1240.95            | 577.07             |
| A_68_P32233090 | chrX:5660210-5660254                              | NM_001033211:306         | AU022751      | INSIDE                 | 1.335                                                        | 2.003                          | 525.42             | 1052.68            | 2.675                          | 683.86             | 1829.42            |
| A_68_P31162031 | chr17:36116088-36116132                           | NR_028516:-142           | Prr3          | PROMOTER               | 1.335                                                        | 0.448                          | 1301.30            | 583.35             | 0.599                          | 1071.92            | 641.72             |
| A_68_P24116035 | chr5:135845821-135845865                          | NM_145414:20             | Nsun5         | INSIDE                 | 1.335                                                        | 15.258                         | 2483.83            | 37899.03           | 20.366                         | 1966.73            | 40055.44           |
| A_68_P23308458 | chr4:131375508-131375552                          | NM_001083119:18663       | Ptpn1         | INSIDE                 | 1.335                                                        | 1.461                          | 956.12             | 1396.76            | 1.950                          | 781.48             | 1523.87            |
| A_68_P25953597 | chr8:73240870-73240914                            | NM_001195253:-1549       | Gm3336        | PROMOTER               | 1.334                                                        | 1.558                          | 793.84             | 1236.54            | 2.078                          | 647.94             | 1346.27            |
| A_68_P24777346 | chr6:116578724-116578768                          | NM_026057:249            | Zfp422        | INSIDE                 | 1.334                                                        | 0.326                          | 3421.32            | 1114.42            | 0.435                          | 2220.50            | 964.90             |
| A_68_P24735710 | chr6:108733170-108733214                          | NM_026011:140            | Arl8b         | INSIDE                 | 1.334                                                        | 0.318                          | 1696.19            | 539.68             | 0.425                          | 1297.49            | 550.90             |
| A_68_P23404994 | chr4:149611310-149611354                          | NM_001025388:-100        | Gm5506        | PROMOTER               | 1.334                                                        | 0.345                          | 4227.31            | 1459.33            | 0.461                          | 2795.38            | 1287.35            |
| A_68_P29701298 | chr14:70843425-70843469                           | NR_029802:130            | Mir320        | DOWNSTREAM             | 1.333                                                        | 0.236                          | 3625.09            | 854.64             | 0.314                          | 2717.84            | 853.95             |
| A_68_P27056145 | chr10:34002444-34002488                           | NM_009433:471            | Tsyp11        | INSIDE                 | 1.333                                                        | 0.287                          | 2342.06            | 672.25             | 0.383                          | 1757.82            | 672.73             |
| A_68_P22941963 | chr4:56877865-56877909                            | NM_018761:197            | Cttna11       | INSIDE                 | 1.333                                                        | 0.302                          | 3548.51            | 1070.53            | 0.402                          | 2895.70            | 1164.28            |
| A_68_P28741416 | chr12:112215114-112215158                         | NM_175207:2095           | Ankrd9        | INSIDE                 | 1.332                                                        | 2.813                          | 668.21             | 1879.91            | 3.748                          | 597.33             | 2238.78            |
| A_68_P28577472 | chr12:81859091-81859135                           | NM_001008423:2590        | Gm1568        | INSIDE                 | 1.332                                                        | 2.785                          | 490.38             | 1365.61            | 3.708                          | 385.83             | 1430.79            |
| A_68_P26986177 | chr10:20032526-20032570                           | NM_001025392:274         | Bclaf1        | INSIDE                 | 1.332                                                        | 0.239                          | 1949.06            | 466.44             | 0.319                          | 1491.84            | 475.64             |
| A_68_P25953725 | chr8:73267162-73267206                            | NM_201607:19222          | Pde4c         | INSIDE                 | 1.332                                                        | 0.527                          | 4561.73            | 2403.15            | 0.702                          | 2906.03            | 2039.24            |
| A_68_P24428222 | chr6:48547522-48547566                            | NM_001079901:3663        | Repn1         | INSIDE                 | 1.332                                                        | 2.462                          | 660.24             | 1625.33            | 3.278                          | 568.56             | 1863.62            |
| A_68_P21395955 | chr2:84877762-84877806                            | NM_001136081:177         | Ssrp1         | INSIDE                 | 1.332                                                        | 0.284                          | 1565.21            | 444.37             | 0.378                          | 1115.44            | 421.76             |
| A_68_P31621445 | chr18:36177706-36177750                           | NM_001167891:179086      | Nrg2          | INSIDE                 | 1.331                                                        | 2.858                          | 280.82             | 802.66             | 3.803                          | 240.68             | 915.34             |
| A_68_P27913320 | chr11:72609515-72609559                           | NM_001045536:-191        | Zzf1          | DIVERGENT_PROMOTER     | 1.331                                                        | 3.863                          | 2792.85            | 10787.80           | 5.140                          | 2299.14            | 11817.40           |
| A_68_P26600191 | chr9:67481194-67481238                            |                          | Unknown       |                        | 1.331                                                        | 0.293                          | 2009.53            | 589.70             | 0.390                          | 1622.33            | 633.46             |
| A_68_P23440735 | chr4:155186739-155186783                          | NM_207678:163            | Ccnl2         | INSIDE                 | 1.331                                                        | 0.146                          | 4911.38            | 719.31             | 0.195                          | 3012.84            | 587.40             |
| A_68_P22970883 | chr4:63157206-63157250                            | NM_001008791:-243        | Whrn          | PROMOTER               | 1.331                                                        | 1.784                          | 542.45             | 967.72             | 2.375                          | 382.79             | 909.14             |
| A_68_P22148836 | chr3:54437650-54437694                            | ENSIMUST00000172420:2312 |               | INSIDE                 | 1.331                                                        | 2.395                          | 192.02             | 459.91             | 3.187                          | 209.40             | 667.38             |
| A_68_P31113145 | chr17:27054067-27054111                           | NM_053173:53             | Kifc5b        | INSIDE                 | 1.330                                                        | 0.391                          | 1584.65            | 620.28             | 0.520                          | 1290.84            | 671.83             |
| A_68_P30346546 | chr15:76003525-76003570                           | NM_201394:22593          | Plec          | INSIDE                 | 1.330                                                        | 1.706                          | 779.93             | 1330.52            | 2.268                          | 622.25             | 1411.44            |
| A_68_P25031177 | chr7:31140943-31140987                            | NM_175478:6827           | Lrfn3         | INSIDE                 | 1.330                                                        | 1.893                          | 844.89             | 1599.40            | 2.518                          | 626.76             | 1578.04            |
| A_68_P24990654 | chr7:19548318-19548362                            | NM_001029877:37104       | Nov2          | INSIDE                 | 1.330                                                        | 0.242                          | 2534.43            | 612.30             | 0.321                          | 1859.43            | 597.48             |
| A_68_P22128831 | chr3:51080337-51080381                            | NM_023502:49551          | Elf2          | INSIDE                 | 1.330                                                        | 1.635                          | 676.36             | 1105.78            | 2.175                          | 424.48             | 923.07             |
| A_68_P25827950 | chr8:46108981-46109030                            | NM_001081286:73444       | Fat1          | INSIDE                 | 1.329                                                        | 2.462                          | 292.26             | 719.54             | 3.273                          | 268.65             | 879.29             |
| A_68_P25370884 | chr7:108146949-108146996                          | NM_008773:13533          | P2ry2         | INSIDE                 | 1.329                                                        | 1.481                          | 994.20             | 1472.50            | 1.969                          | 765.59             | 1507.16            |
| A_68_P31677414 | chr18:46685686-46685730                           | NM_173423:-83            | Fem1c         | PROMOTER               | 1.328                                                        | 1.371                          | 4409.41            | 6045.94            | 1.821                          | 3157.20            | 5748.04            |
| A_68_P30377509 | chr15:81191134-81191178                           | NM_011399:39             | Slc25a17      | INSIDE                 | 1.328                                                        | 0.272                          | 2055.42            | 560.01             | 0.362                          | 1543.73            | 558.50             |
| A_68_P26017291 | chr8:86479163-86479209                            | NM_024184:-406           | Asf1b         | PROMOTER               | 1.328                                                        | 0.348                          | 1545.38            | 538.53             | 0.463                          | 1170.57            | 541.51             |
| A_68_P22373053 | chr3:100881249-100881294                          | NM_011197:32818          | Ptgrn         | INSIDE                 | 1.328                                                        | 2.081                          | 646.83             | 1345.89            | 2.764                          | 544.35             | 1504.62            |
| A_68_P28614436 | chr12:88488867-88488911                           | NM_153415:-36            | Pomt2         | PROMOTER               | 1.327                                                        | 0.293                          | 2237.64            | 656.16             | 0.389                          | 1733.37            | 674.31             |
| A_68_P23748515 | chr5:64359726-64359770                            | NM_145923:388            | Rel1          | INSIDE                 | 1.327                                                        | 0.358                          | 4289.80            | 1535.64            | 0.475                          | 3026.35            | 1437.07            |
| A_68_P23345554 | chr4:137951181-137951225                          | NM_001081672:1171        | Fam43b        | INSIDE                 | 1.327                                                        | 2.178                          | 471.86             | 1027.61            | 2.889                          | 361.25             | 1043.79            |
| A_68_P20412616 | chr1:88425208-88425252                            | NM_008972:1920           | Ptma          | INSIDE                 | 1.327                                                        | 0.180                          | 2736.62            | 492.31             | 0.239                          | 1845.24            | 440.53             |
| A_68_P30346612 | chr15:76011489-76011533                           | NM_201394:14630          | Plec          | INSIDE                 | 1.326                                                        | 2.367                          | 1003.57            | 2375.78            | 3.138                          | 885.83             | 2780.04            |
| A_68_P27534775 | chr10:12667635-126676379                          | NM_001039000:24063       | Kif5a         | INSIDE                 | 1.326                                                        | 1.405                          | 1048.96            | 1474.14            | 1.864                          | 890.21             | 1659.46            |
| A_68_P26682081 | chr9:83040074-83040118                            | NM_026122:118            | Hmgn3         | INSIDE                 | 1.326                                                        | 0.347                          | 1459.06            | 505.70             | 0.459                          | 1092.01            | 501.72             |
| A_68_P25601079 | chr7:150645980-150646024                          | NM_001161624:953         | Cdkn1c        | INSIDE                 | 1.326                                                        | 2.270                          | 1289.41            | 2927.00            | 3.010                          | 981.14             | 2952.91            |
| A_68_P21839205 | chr2:167875907-167875952                          |                          | Unknown       |                        | 1.326                                                        | 0.332                          | 1425.80            | 473.15             | 0.440                          | 1128.99            | 496.96             |
| A_68_P25494916 | chr7:132635012-132635056                          | NM_026330:22             | Nsmc1         | INSIDE                 | 1.325                                                        | 0.202                          | 2384.34            | 482.12             | 0.268                          | 1775.33            | 475.57             |
| A_68_P24946818 | chr7:3637479-3637523                              | NM_029934:7627           | Mboat7        | INSIDE                 | 1.325                                                        | 2.143                          | 1838.63            | 3939.96            | 2.839                          | 1372.20            | 3895.37            |
| A_68_P24629445 | chr6:89594448-89594492                            | NM_001178058:489         | Txnrd3        | INSIDE                 | 1.325                                                        | 0.468                          | 2780.20            | 1300.59            | 0.620                          | 2046.31            | 1268.65            |
| A_68_P24049493 | chr5:122735201-122735245                          | NM_177242:816            | Ppct7         | INSIDE                 | 1.325                                                        | 0.188                          | 3191.84            | 599.94             | 0.249                          | 2469.62            | 615.05             |
| A_68_P24008924 | chr5:115750457-115750502                          | NM_019682:520            | Dynl1         | INSIDE                 | 1.325                                                        | 0.237                          | 2994.88            | 709.41             | 0.314                          | 2155.30            | 676.67             |
| A_68_P31940079 | chr19:7557572-7557616                             | NM_053076:177            | Rtn3          | INSIDE                 | 1.324                                                        | 1.918                          | 2396.30            | 4596.96            | 2.541                          | 1800.96            | 4575.59            |
| A_68_P31295067 | A_68_P31295067                                    |                          | Unknown       |                        | 1.324                                                        | 2.011                          | 1241.61            | 2497.03            | 2.663                          | 920.89             | 2452.63            |
| A_68_P29064232 | chr13:56989171-56989218                           | NM_012035:7755           | Trp7          | INSIDE                 | 1.324                                                        | 1.684                          | 1176.16            | 1980.06            | 2.229                          | 899.33             | 2004.92            |
| A_68_P28684632 | chr12:102137444-102137488                         | NM_001177674:268         | Gpr68         | INSIDE                 | 1.324                                                        | 0.219                          | 2941.79            | 644.71             | 0.290                          | 2024.31            | 587.44             |
| A_68_P27258520 | chr10:75226966-75227010                           | NM_172549:114            | Cabin1        | INSIDE                 | 1.324                                                        | 0.439                          | 1476.85            | 649.02             | 0.582                          | 1153.68            | 671.33             |
| A_68_P22410841 | chr3:107948966-107949010                          | NM_010306:44             | Gnai3         | INSIDE                 | 1.324                                                        | 2.564                          | 1011.46            | 2593.09            | 3.394                          | 855.37             | 2902.74            |
| A_68_P22286829 | chr3:83568459-83568506                            | NM_009144:-1760          | Sfrp2         | PROMOTER               | 1.324                                                        | 0.379                          | 1412.76            | 535.56             | 0.502                          | 967.45             | 485.72             |
| A_68_P21018171 | chr2:13715028-13715072                            | NM_145838:97             | St8sia6       | INSIDE                 | 1.324                                                        | 0.372                          | 3139.76            | 1167.35            | 0.492                          | 2343.32            | 1153.78            |

| ProbeName      | Target position of probe on CpG island microarray | TargetID                 | GeneSymbol    | CpG island Description | Ratio of relative methylation (TiO <sub>2</sub> -NP/Vehicle) | Sham group                     |                    |                    | TiO <sub>2</sub> -H group      |                    |                    |
|----------------|---------------------------------------------------|--------------------------|---------------|------------------------|--------------------------------------------------------------|--------------------------------|--------------------|--------------------|--------------------------------|--------------------|--------------------|
|                |                                                   |                          |               |                        |                                                              | Relative methylation (Cy5/Cy3) | Cy3 signal (Input) | Cy5 signal (MeDIP) | Relative methylation (Cy5/Cy3) | Cy3 signal (Input) | Cy5 signal (MeDIP) |
| A_68_P32572889 | chrX:100643328-100643372                          | NR_002844:16495          | Tsix          | INSIDE                 | 1.323                                                        | 1.375                          | 3968.83            | 5459.02            | 1.819                          | 4954.81            | 9013.97            |
| A_68_P27278592 | chr10:79198242-79198286                           | NM_008226:18886          | Hcn2          | INSIDE                 | 1.323                                                        | 1.835                          | 1282.77            | 2353.34            | 2.427                          | 1018.67            | 2471.96            |
| A_68_P25004348 | chr7:25118652-25118696                            | NM_001163810:310         | 1700008P20Rik | INSIDE                 | 1.323                                                        | 1.467                          | 868.40             | 1273.97            | 1.941                          | 749.18             | 1453.82            |
| A_68_P24995081 | chr7:20334787-20334831                            | NM_008990:114            | Pvrl2         | INSIDE                 | 1.323                                                        | 0.423                          | 2386.47            | 1009.48            | 0.560                          | 2033.07            | 1137.80            |
| A_68_P23316765 | chr4:132833435-132833480                          | NM_025667:248            | Tmem222       | INSIDE                 | 1.323                                                        | 0.246                          | 2946.45            | 725.95             | 0.326                          | 2128.82            | 693.70             |
| A_68_P23118557 | chr4:94269595-94269639                            | NM_172695:322            | Plaa          | INSIDE                 | 1.323                                                        | 0.403                          | 1650.84            | 665.73             | 0.533                          | 1240.94            | 662.00             |
| A_68_P20834311 | chr1:174562855-174562899                          | NM_026725:229            | Dusp23        | INSIDE                 | 1.323                                                        | 0.477                          | 1649.80            | 787.47             | 0.632                          | 1302.32            | 822.57             |
| A_68_P20005842 | chr1:4487520-4487564                              | NM_011441:-1048          | Sox17         | PROMOTER               | 1.323                                                        | 0.230                          | 2030.68            | 467.46             | 0.305                          | 1584.80            | 482.83             |
| A_68_P32127028 | chr19:43598925-43598969                           | NM_010324:149            | Got1          | INSIDE                 | 1.322                                                        | 0.395                          | 1639.16            | 647.15             | 0.522                          | 1345.55            | 702.23             |
| A_68_P26814409 | chr9:108250644-108250688                          | NM_011678:505            | Usp4          | INSIDE                 | 1.322                                                        | 0.222                          | 3255.73            | 722.81             | 0.293                          | 2312.82            | 678.61             |
| A_68_P31438310 | chr17:90855140-90855185                           | NM_020252:636980         | Nrxn1         | INSIDE                 | 1.321                                                        | 2.801                          | 518.65             | 1452.54            | 3.699                          | 394.51             | 1459.12            |
| A_68_P27468583 | chr10:114688211-114688255                         | NM_025706:317            | Tbc1d15       | INSIDE                 | 1.321                                                        | 1.842                          | 1404.07            | 2586.99            | 2.435                          | 1237.42            | 3012.92            |
| A_68_P26363431 | chr9:24578905-24578949                            | NM_194263:-179           | Tbx20         | PROMOTER               | 1.321                                                        | 1.479                          | 777.73             | 1150.18            | 1.954                          | 629.45             | 1229.92            |
| A_68_P23396094 | chr4:148098432-148098477                          | ENSMUST00000139895:10643 |               | DOWNSTREAM             | 1.321                                                        | 0.432                          | 2146.58            | 928.34             | 0.571                          | 1816.39            | 1037.77            |
| A_68_P21309975 | chr2:69423669-69423713                            | NM_001081088:434         | Lrp2          | INSIDE                 | 1.321                                                        | 0.434                          | 1111.06            | 482.20             | 0.573                          | 964.66             | 552.96             |
| A_68_P20945776 | chr1:194660855-194660899                          | NM_001177794:17065       | Sertad4       | DOWNSTREAM             | 1.321                                                        | 1.974                          | 2562.42            | 5058.19            | 2.608                          | 1975.88            | 5152.90            |
| A_68_P31383394 | chr17:80879061-80879105                           | NM_009231:711            | Sos1          | INSIDE                 | 1.320                                                        | 0.253                          | 2477.76            | 627.85             | 0.335                          | 1830.12            | 612.36             |
| A_68_P30496839 | chr15:102077744-102077788                         | NM_001042727:-983        | Rarg          | PROMOTER               | 1.320                                                        | 0.402                          | 1196.50            | 480.58             | 0.530                          | 1028.25            | 545.33             |
| A_68_P28863266 | chr13:19714869-19714913                           | NM_016687:-153           | Sfrp4         | DIVERGENT_PROMOTER     | 1.320                                                        | 0.273                          | 2014.46            | 550.36             | 0.361                          | 1509.88            | 544.40             |
| A_68_P21005392 | chr2:11212245-11212289                            | NM_008859:118258         | Prkcq         | INSIDE                 | 1.320                                                        | 1.611                          | 827.56             | 1333.33            | 2.127                          | 768.65             | 1635.20            |
| A_68_P31929450 | chr19:5560018-5560062                             | NM_019935:535            | Ovol1         | INSIDE                 | 1.319                                                        | 0.235                          | 2281.88            | 536.09             | 0.310                          | 1721.44            | 533.57             |
| A_68_P26808318 | chr9:107302722-107302766                          | NM_001174047:534         | Cacna2d2      | INSIDE                 | 1.319                                                        | 0.393                          | 1614.10            | 635.05             | 0.519                          | 1145.92            | 594.49             |
| A_68_P22128838 | chr3:51081294-51081338                            | NM_023502:48593          | Elf2          | INSIDE                 | 1.319                                                        | 2.796                          | 8211.97            | 22959.71           | 3.686                          | 5624.35            | 20733.52           |
| A_68_P26750365 | chr9:96896276-96896320                            | NM_145134:22476          | Spsb4         | INSIDE                 | 1.318                                                        | 2.172                          | 364.38             | 791.50             | 2.863                          | 367.54             | 1052.12            |
| A_68_P25266278 | chr7:87508116-87508160                            | NM_172903:8123           | Man2a2        | INSIDE                 | 1.318                                                        | 1.838                          | 884.46             | 1625.25            | 2.423                          | 737.55             | 1786.93            |
| A_68_P24325222 | chr6:29162054-29162098                            | NM_011829:195            | Impdh1        | INSIDE                 | 1.318                                                        | 0.219                          | 2643.04            | 578.00             | 0.288                          | 1725.02            | 497.21             |
| A_68_P23904968 | chr5:96590192-96590236                            | NM_178854:560            | Cnot6l        | INSIDE                 | 1.318                                                        | 1.698                          | 651.10             | 1105.26            | 2.237                          | 536.99             | 1201.17            |
| A_68_P23277864 | chr4:125724511-125724555                          | NM_025544:361            | Mrps15        | INSIDE                 | 1.318                                                        | 0.437                          | 1692.65            | 738.90             | 0.575                          | 1074.63            | 618.19             |
| A_68_P22411476 | chr3:108042892-108042936                          | ENSMUST00000119163:-85   |               | PROMOTER               | 1.318                                                        | 1.812                          | 871.23             | 1578.94            | 2.389                          | 727.32             | 1737.78            |
| A_68_P21101779 | chr2:30033906-30033950                            | NM_172660:51             | D2Wsu81c      | INSIDE                 | 1.318                                                        | 0.425                          | 3975.88            | 1688.85            | 0.560                          | 3095.18            | 1732.95            |
| A_68_P32672207 | chrX:131009751-131009795                          | NM_028958:1257           | Taf7l         | INSIDE                 | 1.317                                                        | 2.021                          | 601.67             | 1215.86            | 2.662                          | 771.08             | 2052.52            |
| A_68_P32180646 | chr19:53217182-53217226                           | NM_001164100:-41         | Add3          | PROMOTER               | 1.317                                                        | 0.417                          | 2307.13            | 961.88             | 0.549                          | 1881.12            | 1033.21            |
| A_68_P29604237 | chr14:52626582-52626626                           | NM_001033805:-9935       | G630016D24Rik | PROMOTER               | 1.317                                                        | 1.595                          | 649.79             | 1036.41            | 2.100                          | 509.33             | 1069.78            |
| A_68_P26567742 | chr9:61762149-61762193                            | NM_018853:147            | Rplp1         | INSIDE                 | 1.317                                                        | 0.362                          | 1490.42            | 539.29             | 0.477                          | 1112.39            | 530.23             |
| A_68_P26345766 | chr9:20969493-20969537                            | NM_183408:643            | Pde4a         | PROMOTER               | 1.317                                                        | 0.281                          | 1875.01            | 527.14             | 0.370                          | 1544.80            | 571.86             |
| A_68_P26216376 | chr8:122364529-122364573                          | NM_028071:-71            | Cotl1         | PROMOTER               | 1.317                                                        | 0.363                          | 1731.01            | 628.86             | 0.479                          | 1445.85            | 691.99             |
| A_68_P25016757 | chr7:28119959-28120009                            | NM_001113549:-1317       | Ltpb4         | PROMOTER               | 1.317                                                        | 2.483                          | 303.80             | 754.33             | 3.271                          | 344.86             | 1128.01            |
| A_68_P24089919 | chr5:130089703-130089747                          | NM_011846:-364           | Mmp17         | PROMOTER               | 1.317                                                        | 0.387                          | 2930.55            | 1134.73            | 0.510                          | 2134.34            | 1088.71            |
| A_68_P23621603 | chr5:38952428-38952472                            | NM_011715:384            | Wdr1          | INSIDE                 | 1.317                                                        | 0.393                          | 1410.85            | 554.31             | 0.517                          | 1025.95            | 530.72             |
| A_68_P20644879 | chr1:138157097-138157141                          | NM_001101516:332         | Gpr25         | INSIDE                 | 1.317                                                        | 1.924                          | 326.83             | 628.93             | 2.534                          | 299.25             | 758.39             |
| A_68_P27280126 | chr10:79440000-79440044                           | NM_001003949:7053        | ORF61         | INSIDE                 | 1.316                                                        | 5.447                          | 2080.13            | 11330.92           | 7.168                          | 1648.85            | 11818.67           |
| A_68_P21842275 | chr2:168396762-168396807                          | NM_001136073:18907       | Nfatc2        | INSIDE                 | 1.316                                                        | 2.364                          | 888.73             | 2101.28            | 3.112                          | 827.72             | 2575.78            |
| A_68_P28744398 | chr12:112723379-112723423                         | NM_001033248:634         | Gm266         | INSIDE                 | 1.315                                                        | 0.303                          | 2180.78            | 660.56             | 0.398                          | 1861.44            | 741.25             |
| A_68_P26809314 | chr9:107429770-107429814                          | NM_001174047:127582      | Cacna2d2      | INSIDE                 | 1.315                                                        | 1.727                          | 5487.02            | 9473.39            | 2.270                          | 3671.48            | 8332.51            |
| A_68_P25951932 | chr8:72975857-72975901                            | NM_001122830:24964       | Klhl26        | INSIDE                 | 1.315                                                        | 2.234                          | 837.40             | 1870.73            | 2.937                          | 655.00             | 1923.50            |
| A_68_P20346376 | chr1:74083629-74083673                            | NM_027884:87371          | Tns1          | INSIDE                 | 1.315                                                        | 0.475                          | 1756.53            | 834.89             | 0.625                          | 1589.87            | 993.40             |
| A_68_P30570064 | chr16:16599861-16599905                           | ENSMUST00000162671:189   |               | INSIDE                 | 1.314                                                        | 0.462                          | 1622.83            | 749.16             | 0.606                          | 1421.85            | 862.26             |
| A_68_P27286998 | chr10:80494022-80494066                           | NM_134135:2613           | Slc39a3       | INSIDE                 | 1.314                                                        | 2.236                          | 1451.44            | 3245.12            | 2.938                          | 1239.83            | 3643.13            |
| A_68_P24118628 | chr5:136410394-136410438                          | NM_018871:95             | Ywhag         | INSIDE                 | 1.314                                                        | 1.917                          | 1360.13            | 2607.75            | 2.520                          | 1155.29            | 2911.35            |
| A_68_P23393509 | chr4:147661752-147661796                          | NM_001083342:300         | Ptchd2        | INSIDE                 | 1.314                                                        | 0.203                          | 3276.87            | 664.41             | 0.266                          | 2378.68            | 633.80             |
| A_68_P22998987 | chr4:68614912-68614956                            | NM_019967:497            | Dcb1          | INSIDE                 | 1.314                                                        | 0.348                          | 4055.65            | 1410.99            | 0.457                          | 3247.95            | 1484.77            |
| A_68_P25656686 | chr8:11635354-11635398                            | NR_030781:-340           | Ankrd10       | PROMOTER               | 1.313                                                        | 1.566                          | 1125.95            | 1763.77            | 2.056                          | 799.96             | 1644.84            |
| A_68_P24870736 | chr6:135994225-135994269                          | NM_008171:129283         | Grin2b        | INSIDE                 | 1.313                                                        | 1.632                          | 1082.07            | 1766.38            | 2.144                          | 990.22             | 2122.99            |
| A_68_P23451681 | chr5:4756586-4756630                              | NM_021457:1608           | Fzd1          | INSIDE                 | 1.313                                                        | 0.524                          | 4179.30            | 2191.23            | 0.689                          | 3094.53            | 2130.87            |
| A_68_P23310402 | chr4:131700231-131700275                          | NM_013622:149            | Oprd1         | INSIDE                 | 1.313                                                        | 0.226                          | 3644.99            | 824.98             | 0.297                          | 2347.37            | 697.36             |
| A_68_P21345229 | chr2:75497988-75498032                            | NR_033513:664            | Gm6793        | INSIDE                 | 1.313                                                        | 0.215                          | 2944.20            | 634.25             | 0.283                          | 2232.59            | 631.64             |
| A_68_P29681788 | chr14:67486601-67486645                           | NM_009955:815            | Dpysl2        | INSIDE                 | 1.312                                                        | 0.127                          | 5089.13            | 646.56             | 0.167                          | 3366.07            | 561.14             |
| A_68_P27629545 | chr11:19920766-19920810                           | NM_033523:96344          | Spred2        | INSIDE                 | 1.312                                                        | 1.678                          | 648.45             | 1088.06            | 2.201                          | 597.89             | 1315.80            |
| A_68_P27290415 | chr10:81007993-81008037                           | NM_010301:-223           | Gna11         | PROMOTER               | 1.312                                                        | 0.384                          | 2232.54            | 857.04             | 0.503                          | 1758.21            | 885.24             |
| A_68_P23069061 | chr4:84191429-84191473                            | NM_172870:129540         | Bnc2          | INSIDE                 | 1.312                                                        | 2.024                          | 1082.47            | 2190.48            | 2.656                          | 796.86             | 2116.11            |
| A_68_P20877855 | chr1:182724593-182724637                          | NM_008210:19120          | H3f3a         | DOWNSTREAM             | 1.312                                                        | 0.424                          | 1770.96            | 751.47             | 0.557                          | 1384.31            | 770.93             |
| A_68_P27311665 | chr10:85484572-85484616                           | NM_153195:-79            | Fbxo7         | DIVERGENT_PROMOTER     | 1.311                                                        | 2.852                          | 177.92             | 507.41             | 3.740                          | 154.22             | 576.79             |
| A_68_P25272114 | chr7:88600003-88600048                            | NM_007755:-463           | Cpeb1         | PROMOTER               | 1.311                                                        | 1.691                          | 715.94             | 1210.90            | 2.218                          | 530.14             | 1175.95            |
| A_68_P24025033 | chr5:118619514-118619558                          | NM_007545:-236           | Hrk           | PROMOTER               | 1.311                                                        | 0.324                          | 2818.19            | 912.69             | 0.425                          | 2040.04            | 866.03             |
| A_68_P23320879 | chr4:133628861-133628905                          | NM_001162970:4516        | Aim1l         | INSIDE                 | 1.311                                                        | 1.613                          | 972.62             | 1568.77            | 2.114                          | 804.80             | 1701.17            |

| ProbeName      | Target position of probe on CpG island microarray | TargetID           | GeneSymbol    | CpG island Description | Ratio of relative methylation (TiO <sub>2</sub> -NP/Vehicle) | Sham group                     |                    |                    | TiO <sub>2</sub> -H group      |                    |                    |
|----------------|---------------------------------------------------|--------------------|---------------|------------------------|--------------------------------------------------------------|--------------------------------|--------------------|--------------------|--------------------------------|--------------------|--------------------|
|                |                                                   |                    |               |                        |                                                              | Relative methylation (Cy5/Cy3) | Cy3 signal (Input) | Cy5 signal (MeDIP) | Relative methylation (Cy5/Cy3) | Cy3 signal (Input) | Cy5 signal (MeDIP) |
| A_68_P22406466 | chr3:107262060-107262104                          | NM_145922:-266     | Kenc4         | PROMOTER               | 1.311                                                        | 0.370                          | 1744.14            | 645.42             | 0.485                          | 1247.11            | 604.84             |
| A_68_P30346608 | chr15:76011006-76011051                           | NM_201394:15112    | Plec          | INSIDE                 | 1.310                                                        | 2.462                          | 287.45             | 707.83             | 3.226                          | 213.67             | 689.25             |
| A_68_P28944868 | chr13:35832908-35832952                           | NM_001123386:-340  | Cdyl          | PROMOTER               | 1.310                                                        | 0.313                          | 1498.67            | 469.18             | 0.410                          | 1194.12            | 489.59             |
| A_68_P25091867 | chr7:52471545-52471589                            | NM_011565:444      | Tead2         | INSIDE                 | 1.310                                                        | 17.182                         | 3543.32            | 60881.34           | 22.503                         | 3355.12            | 75499.59           |
| A_68_P22889660 | chr4:46626863-46626907                            | NM_198664:36187    | Tbc1d2        | INSIDE                 | 1.310                                                        | 3.039                          | 978.82             | 2974.40            | 3.980                          | 734.67             | 2924.01            |
| A_68_P31620319 | chr18:35991681-35991725                           | NM_133687:2231     | Cxxc5         | INSIDE                 | 1.309                                                        | 2.293                          | 373.89             | 857.49             | 3.002                          | 302.32             | 907.50             |
| A_68_P28573970 | chr12:81233412-81233456                           | NR_033514:397      | 2310015A10Rik | INSIDE                 | 1.309                                                        | 0.387                          | 1427.97            | 551.95             | 0.506                          | 1018.35            | 515.23             |
| A_68_P26202777 | chr8:119960582-119960626                          | NM_028941:87535    | 4933407C03Rik | INSIDE                 | 1.309                                                        | 1.829                          | 660.47             | 1207.96            | 2.394                          | 513.95             | 1230.35            |
| A_68_P24519506 | chr6:66986584-66986628                            | NM_007836:795      | Gadd45a       | INSIDE                 | 1.309                                                        | 0.233                          | 3658.79            | 852.37             | 0.305                          | 2660.62            | 811.40             |
| A_68_P31096791 | chr17:24489119-24489163                           | NM_001039581:150   | Abca3         | INSIDE                 | 1.308                                                        | 0.456                          | 1424.81            | 649.66             | 0.596                          | 1105.14            | 658.96             |
| A_68_P30113930 | chr15:31296769-31296813                           | NM_001164441:724   | Ankrd33b      | INSIDE                 | 1.308                                                        | 0.166                          | 2956.50            | 491.73             | 0.218                          | 2128.16            | 463.09             |
| A_68_P28066376 | chr11:100006643-100006687                         | NM_008471:569      | Krt19         | INSIDE                 | 1.308                                                        | 0.334                          | 1649.84            | 551.55             | 0.437                          | 1328.21            | 580.71             |
| A_68_P31257262 | chr17:56749026-56749070                           | NM_153152:146      | 2410015M20Rik | INSIDE                 | 1.307                                                        | 0.213                          | 4498.76            | 958.41             | 0.278                          | 3077.95            | 856.75             |
| A_68_P27535211 | chr10:126748493-126748537                         | NM_001003913:328   | Mars          | INSIDE                 | 1.306                                                        | 0.153                          | 4612.44            | 705.86             | 0.200                          | 2996.95            | 598.76             |
| A_68_P23080770 | chr4:86257737-86257781                            | NM_173400:168      | Haus6         | INSIDE                 | 1.306                                                        | 0.297                          | 1761.64            | 523.29             | 0.388                          | 1403.00            | 544.12             |
| A_68_P22309969 | chr3:87587605-87587650                            | NM_001033124:11457 | Ntrk1         | INSIDE                 | 1.306                                                        | 2.331                          | 303.51             | 707.43             | 3.044                          | 259.67             | 790.31             |
| A_68_P20849636 | chr1:177622240-177622284                          | NM_021350:-3778    | Chml          | PROMOTER               | 1.306                                                        | 0.215                          | 2710.45            | 583.66             | 0.281                          | 1960.54            | 551.39             |
| A_68_P31206429 | chr17:46464876-46464920                           | NM_145140:-2183    | Abcc10        | PROMOTER               | 1.305                                                        | 0.399                          | 1239.53            | 495.19             | 0.521                          | 1091.95            | 569.18             |
| A_68_P25091031 | chr7:52332036-52332080                            | NM_001163684:14260 | Nosip         | INSIDE                 | 1.305                                                        | 1.993                          | 1190.75            | 2372.84            | 2.601                          | 801.35             | 2084.49            |
| A_68_P21628854 | chr2:130100093-130100137                          | NM_024193:-33      | Nop56         | PROMOTER               | 1.305                                                        | 0.251                          | 1917.24            | 480.28             | 0.327                          | 1416.48            | 462.94             |
| A_68_P31933117 | chr19:6184699-6184743                             | NM_001165919:311   | 170012301Rik  | INSIDE                 | 1.304                                                        | 2.190                          | 262.79             | 575.42             | 2.855                          | 210.77             | 601.85             |
| A_68_P30480285 | chr15:99288147-99288191                           | NM_001001884:11    | Nckap5l       | INSIDE                 | 1.304                                                        | 0.414                          | 1572.95            | 651.31             | 0.540                          | 1151.06            | 621.60             |
| A_68_P29753353 | chr14:80170990-80171034                           | NM_001042726:107   | Pcdh8         | INSIDE                 | 1.304                                                        | 0.350                          | 1638.51            | 574.27             | 0.457                          | 1308.35            | 598.05             |
| A_68_P29083949 | chr13:60278471-60278515                           | NM_008086:404      | Gas1          | INSIDE                 | 1.304                                                        | 0.293                          | 2567.99            | 753.59             | 0.383                          | 2111.34            | 807.83             |
| A_68_P23328509 | chr4:134989508-134989552                          | NM_022980:190      | Rcan3         | INSIDE                 | 1.304                                                        | 0.316                          | 1630.66            | 515.86             | 0.412                          | 1232.17            | 508.13             |
| A_68_P21812328 | chr2:163244957-163245001                          | NM_025699:228      | 3230401D17Rik | INSIDE                 | 1.304                                                        | 6.779                          | 1919.21            | 13010.32           | 8.838                          | 1791.47            | 15832.50           |
| A_68_P21617369 | chr2:127952159-127952203                          | NM_009754:407      | Bcl2l1l       | INSIDE                 | 1.304                                                        | 0.324                          | 2287.50            | 740.65             | 0.422                          | 1719.17            | 725.92             |
| A_68_P31836527 | chr18:75526699-75526743                           | NM_001042660:-298  | Smad7         | PROMOTER               | 1.303                                                        | 1.615                          | 417.34             | 674.14             | 2.105                          | 342.31             | 720.67             |
| A_68_P30346592 | chr15:76009110-76009154                           | NM_201394:17008    | Plec          | INSIDE                 | 1.303                                                        | 3.265                          | 461.92             | 1508.37            | 4.253                          | 430.44             | 1830.80            |
| A_68_P27798797 | chr11:52174094-52174138                           | NM_011694:-500     | Vdac1         | PROMOTER               | 1.303                                                        | 0.312                          | 1548.22            | 482.60             | 0.406                          | 1141.90            | 463.94             |
| A_68_P24995608 | chr7:20443293-20443337                            | NM_001033419:3334  | Ceacam16      | INSIDE                 | 1.303                                                        | 1.472                          | 1276.46            | 1879.08            | 1.919                          | 1008.81            | 1935.46            |
| A_68_P24816526 | chr6:124661846-124661896                          | NM_013536:326      | Emgl          | INSIDE                 | 1.303                                                        | 0.386                          | 2119.75            | 817.73             | 0.503                          | 1490.93            | 749.20             |
| A_68_P23309105 | chr4:131476142-131476186                          | NM_001201367:-1521 | Tmem200b      | PROMOTER               | 1.303                                                        | 0.401                          | 1453.97            | 582.58             | 0.522                          | 1045.35            | 545.77             |
| A_68_P22900935 | chr4:48597734-48597778                            | NM_021436:-308     | Tmeffl        | PROMOTER               | 1.303                                                        | 0.460                          | 1372.62            | 631.21             | 0.599                          | 1091.80            | 654.22             |
| A_68_P21839461 | chr2:167924453-167924497                          | NM_021409:17971    | Pard6b        | INSIDE                 | 1.303                                                        | 2.360                          | 1665.83            | 3931.70            | 3.076                          | 1248.74            | 3840.90            |
| A_68_P21492627 | chr2:104967572-104967616                          | NM_144783:909      | Wt1           | INSIDE                 | 1.303                                                        | 0.352                          | 1474.42            | 518.53             | 0.458                          | 1098.29            | 503.24             |
| A_68_P30003954 | chr15:9000908-9000952                             | NM_001040395:-78   | 1110020G09Rik | PROMOTER               | 1.302                                                        | 0.277                          | 2116.37            | 587.00             | 0.361                          | 1418.65            | 512.49             |
| A_68_P29568494 | chr14:45608721-45608765                           | NM_008964:957      | Ptger2        | INSIDE                 | 1.302                                                        | 0.217                          | 2225.43            | 482.42             | 0.282                          | 1591.99            | 449.46             |
| A_68_P27567649 | chr11:6174389-6174433                             | NM_134020:430      | Tmed4         | INSIDE                 | 1.302                                                        | 0.367                          | 2396.20            | 880.18             | 0.478                          | 1827.38            | 873.79             |
| A_68_P24759222 | chr6:113342962-113343006                          | NM_133923:494      | Tlll3         | INSIDE                 | 1.302                                                        | 0.203                          | 2526.49            | 512.23             | 0.264                          | 1697.60            | 448.10             |
| A_68_P23202061 | chr4:109349433-109349477                          | NM_007983:223      | Fafl          | INSIDE                 | 1.302                                                        | 0.260                          | 1791.29            | 466.61             | 0.339                          | 1379.64            | 467.79             |
| A_68_P32691810 | chrX:135448778-135448822                          | NM_013724:-168     | Nrk           | PROMOTER               | 1.301                                                        | 0.385                          | 3970.43            | 1529.09            | 0.501                          | 5464.84            | 2738.88            |
| A_68_P32328376 | chrX:35918353-35918397                            | NM_001110142:10999 | Cul4b         | INSIDE                 | 1.301                                                        | 2.803                          | 3487.45            | 9776.16            | 3.648                          | 4131.05            | 15071.25           |
| A_68_P31545966 | chr18:21811604-21811648                           | NM_001081403:-757  | Klhl14        | PROMOTER               | 1.301                                                        | 0.193                          | 3321.83            | 642.14             | 0.252                          | 2383.05            | 599.46             |
| A_68_P31206979 | chr17:46592282-46592326                           | NM_001162864:32320 | Tbkl1         | INSIDE                 | 1.301                                                        | 0.245                          | 2886.81            | 706.84             | 0.319                          | 2133.13            | 679.67             |
| A_68_P31160312 | chr17:35804249-35804293                           | NM_175137:267      | Vars2         | INSIDE                 | 1.301                                                        | 0.362                          | 2203.36            | 797.33             | 0.471                          | 1599.39            | 753.10             |
| A_68_P27844725 | chr11:60591042-60591086                           | NM_175491:38       | Smer8         | INSIDE                 | 1.301                                                        | 0.332                          | 1436.11            | 476.89             | 0.432                          | 1131.64            | 488.87             |
| A_68_P27500272 | chr10:120335821-120335865                         | NM_177092:185      | Msr3b         | INSIDE                 | 1.301                                                        | 0.334                          | 1478.22            | 494.38             | 0.435                          | 1247.18            | 542.58             |
| A_68_P25262217 | chr7:86762595-86762639                            | NM_019799:-73      | Rheg          | PROMOTER               | 1.301                                                        | 20.862                         | 1474.45            | 30759.52           | 27.135                         | 1460.37            | 39626.33           |
| A_68_P25004262 | chr7:25101544-25101588                            | NM_001199321:119   | Zfp94         | INSIDE                 | 1.301                                                        | 0.408                          | 1660.69            | 677.11             | 0.531                          | 1257.67            | 667.33             |
| A_68_P21769695 | chr2:155970095-155970139                          | NM_025946:37       | Romo1         | INSIDE                 | 1.301                                                        | 0.433                          | 2141.07            | 927.68             | 0.564                          | 1660.50            | 936.20             |
| A_68_P20411445 | chr1:88200193-88200237                            | NM_145222:419      | B3gnt7        | INSIDE                 | 1.301                                                        | 0.431                          | 1836.70            | 790.70             | 0.560                          | 1517.28            | 849.60             |
| A_68_P31676224 | chr18:46471665-46471709                           | NM_001160399:-104  | Ccdc112       | PROMOTER               | 1.300                                                        | 4.166                          | 5865.44            | 24434.63           | 5.415                          | 4336.97            | 23484.22           |
| A_68_P29513185 | chr14:32454394-32454438                           | NM_025295:174      | Btd           | INSIDE                 | 1.300                                                        | 0.425                          | 1264.83            | 537.92             | 0.553                          | 1015.41            | 561.19             |
| A_68_P28872662 | chr13:21494612-21494656                           | NM_001145778:-10   | Zkscan3       | PROMOTER               | 1.300                                                        | 0.305                          | 2628.86            | 800.86             | 0.396                          | 2106.94            | 834.35             |
| A_68_P23981860 | chr5:111209639-111209683                          | NM_001025562:-26   | Pus1          | PROMOTER               | 1.300                                                        | 0.416                          | 1512.58            | 629.70             | 0.541                          | 1170.10            | 633.24             |
| A_68_P32150744 | chr19:47653811-47653855                           | NM_001164639:-676  | Slk           | PROMOTER               | 1.299                                                        | 1.507                          | 1276.59            | 1923.71            | 1.957                          | 891.75             | 1745.01            |
| A_68_P29659270 | chr14:63741403-63741447                           | NM_007798:123      | Ctsb          | INSIDE                 | 1.299                                                        | 0.215                          | 2384.47            | 511.87             | 0.279                          | 1873.90            | 522.54             |
| A_68_P28608874 | chr12:87585109-87585153                           | NM_027405:2303     | 1700020003Rik | INSIDE                 | 1.299                                                        | 1.853                          | 1418.39            | 2627.86            | 2.408                          | 1076.17            | 2590.94            |
| A_68_P27278193 | chr10:79138046-79138092                           | NM_148934:5914     | Gml6517       | INSIDE                 | 1.299                                                        | 2.145                          | 276.22             | 592.36             | 2.785                          | 214.61             | 597.71             |
| A_68_P27184368 | chr10:61595655-61595699                           | NM_009719:-161     | Neurog3       | PROMOTER               | 1.299                                                        | 0.286                          | 2299.34            | 658.07             | 0.372                          | 1727.61            | 642.15             |
| A_68_P25948512 | chr8:72410079-72410123                            | NM_026818:1191     | Cilp2         | INSIDE                 | 1.299                                                        | 0.180                          | 2762.66            | 498.59             | 0.234                          | 1986.05            | 465.45             |
| A_68_P25447598 | chr7:123478008-123478053                          | NM_026533:-326     | Rps13         | PROMOTER               | 1.299                                                        | 0.286                          | 2323.63            | 663.98             | 0.371                          | 1618.98            | 600.78             |
| A_68_P32119204 | chr19:42203483-42203527                           | NM_027106:-21      | Avpi1         | PROMOTER               | 1.298                                                        | 0.292                          | 2105.64            | 615.59             | 0.379                          | 1533.59            | 581.90             |
| A_68_P30346597 | chr15:76009753-76009797                           | NM_201394:16366    | Plec          | INSIDE                 | 1.298                                                        | 1.552                          | 681.66             | 1057.90            | 2.015                          | 538.31             | 1084.79            |

| ProbeName      | Target position of probe on CpG island microarray | TargetID              | GeneSymbol | CpG island Description | Ratio of relative methylation (TiO <sub>2</sub> -NP/Vehicle) | Sham group                     |                    |                    | TiO <sub>2</sub> -H group      |                    |                    |
|----------------|---------------------------------------------------|-----------------------|------------|------------------------|--------------------------------------------------------------|--------------------------------|--------------------|--------------------|--------------------------------|--------------------|--------------------|
|                |                                                   |                       |            |                        |                                                              | Relative methylation (Cy5/Cy3) | Cy3 signal (Input) | Cy5 signal (MeDIP) | Relative methylation (Cy5/Cy3) | Cy3 signal (Input) | Cy5 signal (MeDIP) |
| A_68_P28149754 | chr11:114647920-114647964                         | NM_001102615:21240    | Kif19a     | INSIDE                 | 1.298                                                        | 1.886                          | 536.88             | 1012.50            | 2.448                          | 441.27             | 1080.37            |
| A_68_P24125310 | chr5:137791448-137791492                          | NM_001159571:134      | Ephb4      | INSIDE                 | 1.298                                                        | 0.206                          | 4503.91            | 926.26             | 0.267                          | 3246.01            | 866.65             |
| A_68_P23410163 | chr4:150482039-150482083                          | NM_001081557:753817   | Camta1     | INSIDE                 | 1.298                                                        | 0.280                          | 5984.16            | 1675.87            | 0.364                          | 3987.72            | 1449.67            |
| A_68_P21797520 | chr2:160698110-160698154                          | NM_177263:594         | Zfx3       | INSIDE                 | 1.298                                                        | 0.115                          | 4670.71            | 537.22             | 0.149                          | 3264.78            | 487.43             |
| A_68_P28540453 | chr12:75008595-75008639                           | NM_010431:-237        | Hif1a      | PROMOTER               | 1.297                                                        | 0.252                          | 1858.57            | 469.16             | 0.327                          | 1482.34            | 485.40             |
| A_68_P26891188 | chr9:122656242-122656286                          | NM_001199736:-199     | Gm9524     | PROMOTER               | 1.297                                                        | 3.515                          | 643.80             | 2262.74            | 4.558                          | 549.93             | 2506.31            |
| A_68_P25989170 | chr8:81033243-81033287                            | NM_029736:31          | Slc10a7    | INSIDE                 | 1.297                                                        | 0.403                          | 1833.99            | 739.27             | 0.523                          | 1317.44            | 688.69             |
| A_68_P20474867 | chr1:99991841-99991885                            | NM_013626:347         | Pam        | INSIDE                 | 1.297                                                        | 0.399                          | 1708.89            | 681.03             | 0.517                          | 1349.11            | 697.31             |
| A_68_P30290896 | chr15:66117380-66117424                           | NM_152923:384         | Kcnq3      | INSIDE                 | 1.296                                                        | 0.185                          | 2678.24            | 496.25             | 0.240                          | 2094.95            | 503.12             |
| A_68_P28787943 | chr13:3358419-3358463                             |                       |            | Unknown                | 1.296                                                        | 0.217                          | 2208.39            | 479.62             | 0.281                          | 1732.17            | 487.49             |
| A_68_P25354129 | chr7:105293827-105293871                          | NM_011010:109         | Omp        | INSIDE                 | 1.296                                                        | 1.752                          | 463.76             | 812.44             | 2.271                          | 464.29             | 1054.49            |
| A_68_P25091594 | chr7:52430274-52430318                            | NM_182993:11006       | Slc17a7    | INSIDE                 | 1.296                                                        | 0.444                          | 1265.00            | 562.19             | 0.576                          | 999.07             | 575.29             |
| A_68_P25089829 | chr7:52125162-52125206                            | NM_133949:-26         | Ptov1      | PROMOTER               | 1.296                                                        | 0.444                          | 1731.79            | 768.80             | 0.575                          | 1240.77            | 713.84             |
| A_68_P25083584 | chr7:50932175-50932219                            | NM_145582:4796        | Ctut1      | INSIDE                 | 1.296                                                        | 2.713                          | 616.90             | 1673.93            | 3.515                          | 514.08             | 1807.25            |
| A_68_P23600216 | chr5:35740010-35740054                            | NM_010445:8267        | Hmx1       | DOWNSTREAM             | 1.296                                                        | 0.106                          | 8048.35            | 853.31             | 0.137                          | 5498.87            | 755.37             |
| A_68_P22341989 | chr3:94846418-94846462                            | NM_008951:27          | Psm4d      | INSIDE                 | 1.296                                                        | 0.297                          | 1720.14            | 510.94             | 0.385                          | 1334.25            | 513.60             |
| A_68_P21906905 | chr2:180628389-180628433                          | NR_029538:-334        | Mirl24a-3  | PROMOTER               | 1.296                                                        | 0.424                          | 1328.05            | 562.43             | 0.549                          | 1090.91            | 598.78             |
| A_68_P20454938 | chr1:95239228-95239272                            | NM_080850:115         | Pask       | INSIDE                 | 1.296                                                        | 0.224                          | 2775.84            | 622.58             | 0.291                          | 2143.12            | 622.95             |
| A_68_P30602965 | chr16:23431568-23431612                           | NM_001004151:2385     | Rtp1       | INSIDE                 | 1.295                                                        | 1.754                          | 1303.27            | 2285.33            | 2.271                          | 1098.51            | 2494.21            |
| A_68_P25949497 | chr8:72567016-72567060                            | NM_027481:327         | Sugp1      | INSIDE                 | 1.295                                                        | 0.147                          | 3436.06            | 505.09             | 0.190                          | 2178.13            | 414.63             |
| A_68_P21874751 | chr2:174154053-174154097                          | NM_001077510:-1515    | Gnas       | PROMOTER               | 1.295                                                        | 1.894                          | 786.73             | 1490.41            | 2.453                          | 633.22             | 1553.30            |
| A_68_P32126461 | chr19:43515670-43515714                           | NM_031396:767         | Cnm1       | INSIDE                 | 1.294                                                        | 3.081                          | 159.00             | 489.96             | 3.987                          | 151.54             | 604.27             |
| A_68_P29075347 | chr13:58907978-58908022                           | NM_001025074:-1193    | Ntrk2      | PROMOTER               | 1.294                                                        | 0.142                          | 6505.53            | 924.79             | 0.184                          | 3925.32            | 722.21             |
| A_68_P27883391 | chr11:67269235-67269279                           | ENSMUST00000136796:31 |            | INSIDE                 | 1.294                                                        | 0.282                          | 1652.68            | 466.58             | 0.365                          | 1237.65            | 452.04             |
| A_68_P26567746 | chr9:61762612-61762656                            | NM_018853:-317        | Rplp1      | PROMOTER               | 1.294                                                        | 0.187                          | 2345.30            | 437.76             | 0.242                          | 1718.32            | 415.04             |
| A_68_P26346146 | chr9:21049162-21049206                            | NM_053190:3703        | Slpr5      | INSIDE                 | 1.294                                                        | 0.228                          | 2162.55            | 492.89             | 0.295                          | 1718.82            | 506.84             |
| A_68_P23896971 | chr5:93371578-93371622                            | NM_001077596:44577    | Shroom3    | INSIDE                 | 1.294                                                        | 3.305                          | 646.80             | 2137.83            | 4.276                          | 551.87             | 2359.53            |
| A_68_P21419732 | chr2:90780813-90780857                            | NM_017368:220         | Celf1      | INSIDE                 | 1.294                                                        | 0.551                          | 3437.79            | 1895.04            | 0.713                          | 2484.04            | 1771.98            |
| A_68_P30671369 | chr16:35651290-35651334                           | NM_013661:109865      | Sema5b     | INSIDE                 | 1.293                                                        | 2.247                          | 454.10             | 1020.41            | 2.905                          | 421.02             | 1223.21            |
| A_68_P28724511 | chr12:109153539-109153583                         | NM_001079883:88064    | Bcl11b     | INSIDE                 | 1.293                                                        | 1.544                          | 1788.38            | 2761.93            | 1.997                          | 1461.38            | 2918.96            |
| A_68_P26932993 | chr10:9620586-9620630                             | NM_001081344:230      | Stxbp5     | INSIDE                 | 1.293                                                        | 14.404                         | 1367.86            | 19703.19           | 18.628                         | 1239.31            | 23086.17           |
| A_68_P26022317 | chr8:87381112-87381157                            | NM_025648:250         | Farsa      | INSIDE                 | 1.293                                                        | 3.088                          | 313.32             | 967.43             | 3.991                          | 278.72             | 1112.50            |
| A_68_P20454941 | chr1:95239500-95239544                            | NM_080850:-157        | Pask       | DIVERGENT_PROMOTER     | 1.293                                                        | 0.174                          | 3182.46            | 553.28             | 0.225                          | 2288.19            | 514.24             |
| A_68_P29292644 | chr13:105607137-105607182                         | NM_026072:-126        | Cwc27      | DIVERGENT_PROMOTER     | 1.292                                                        | 0.405                          | 1573.21            | 637.03             | 0.523                          | 1288.44            | 674.22             |
| A_68_P23270865 | chr4:124562969-124563014                          | NM_177671:3963        | Epha10     | INSIDE                 | 1.292                                                        | 2.230                          | 455.89             | 1016.47            | 2.881                          | 384.22             | 1106.80            |
| A_68_P21483987 | chr2:103406555-103406599                          | NM_178890:110         | Abtb2      | INSIDE                 | 1.292                                                        | 1.993                          | 319.01             | 635.67             | 2.575                          | 240.66             | 619.63             |
| A_68_P29715884 | chr14:73542895-73542939                           | NR_033185:325         | Rcbbt2     | INSIDE                 | 1.291                                                        | 1.728                          | 593.02             | 1024.51            | 2.230                          | 591.52             | 1319.26            |
| A_68_P28778765 | chr12:119540713-119540757                         | NM_001166385:-821     | Sp4        | PROMOTER               | 1.291                                                        | 0.131                          | 4105.49            | 538.03             | 0.169                          | 3065.02            | 518.76             |
| A_68_P26543677 | chr9:57612772-57612816                            | NM_007713:873         | Clk3       | INSIDE                 | 1.291                                                        | 0.364                          | 2904.78            | 1057.75            | 0.470                          | 2183.38            | 1026.68            |
| A_68_P23609675 | chr5:37187966-37188010                            | NM_026242:5           | Mrfap1     | INSIDE                 | 1.291                                                        | 0.255                          | 2037.43            | 519.66             | 0.329                          | 1425.34            | 469.37             |
| A_68_P22412463 | chr3:108209838-108209882                          | NM_001004177:8552     | Celsr2     | INSIDE                 | 1.291                                                        | 2.894                          | 2559.35            | 7405.74            | 3.736                          | 1771.85            | 6619.86            |
| A_68_P31777744 | chr18:65047479-65047523                           | NM_001114386:91       | Nedd4l     | INSIDE                 | 1.290                                                        | 5.680                          | 941.20             | 5346.41            | 7.328                          | 858.36             | 6289.79            |
| A_68_P31201713 | chr17:45683888-45683932                           | NM_001013749:2716     | Tmem151b   | INSIDE                 | 1.290                                                        | 1.692                          | 599.04             | 1013.44            | 2.183                          | 501.46             | 1094.45            |
| A_68_P30575874 | chr16:17815530-17815575                           | NM_153790:18178       | Scarf2     | DOWNSTREAM             | 1.290                                                        | 2.682                          | 1484.94            | 3981.96            | 3.458                          | 1083.32            | 3746.05            |
| A_68_P27940743 | chr11:77796384-77796428                           | NM_174852:89          | Phf12      | INSIDE                 | 1.290                                                        | 0.208                          | 4551.59            | 945.02             | 0.268                          | 2944.50            | 788.72             |
| A_68_P26744826 | chr9:95855075-95855119                            | NM_011916:-82         | Xmr1       | PROMOTER               | 1.290                                                        | 0.524                          | 2662.76            | 1394.68            | 0.676                          | 1943.91            | 1313.87            |
| A_68_P26018643 | chr8:86708025-86708069                            | NR_029821:-5186       | Mirl81c    | PROMOTER               | 1.290                                                        | 0.513                          | 3349.34            | 1718.75            | 0.662                          | 2464.63            | 1631.42            |
| A_68_P21106329 | chr2:30838095-30838139                            | NM_028846:318         | Usp20      | INSIDE                 | 1.290                                                        | 0.474                          | 1907.64            | 904.50             | 0.612                          | 1474.45            | 901.77             |
| A_68_P20354314 | chr1:75472567-75472611                            | NM_001001565:3458     | Chpf       | INSIDE                 | 1.290                                                        | 1.961                          | 847.44             | 1661.95            | 2.529                          | 666.32             | 1685.46            |
| A_68_P26949658 | chr10:12912982-12913026                           | NM_181470:-61         | Liv1       | PROMOTER               | 1.289                                                        | 0.415                          | 1251.61            | 519.47             | 0.535                          | 983.51             | 526.17             |
| A_68_P24643638 | chr6:92133742-92133786                            | NM_025578:253         | Mrps25     | INSIDE                 | 1.289                                                        | 0.280                          | 2002.52            | 560.41             | 0.361                          | 1564.11            | 564.12             |
| A_68_P24589802 | chr6:82723996-82724040                            | NM_013820:430         | Hk2        | INSIDE                 | 1.289                                                        | 0.304                          | 1784.03            | 542.69             | 0.392                          | 1450.22            | 568.76             |
| A_68_P24596104 | chr6:83864539-83864583                            | NM_001166371:214      | Zfml       | INSIDE                 | 1.288                                                        | 0.432                          | 2319.11            | 1002.13            | 0.557                          | 1802.13            | 1002.90            |
| A_68_P24172965 | chr5:148116273-148116317                          | NM_007673:2531        | Cdx2       | INSIDE                 | 1.288                                                        | 0.239                          | 2213.21            | 528.76             | 0.308                          | 1629.21            | 501.25             |
| A_68_P24089368 | chr5:130007907-130007951                          | NM_172276:823         | Slswap     | INSIDE                 | 1.288                                                        | 0.435                          | 1786.15            | 776.10             | 0.560                          | 1305.79            | 731.00             |
| A_68_P26896524 | chr9:123626729-123626773                          | NM_033322:-75         | Lztf1      | PROMOTER               | 1.287                                                        | 0.125                          | 4366.97            | 547.89             | 0.162                          | 3007.71            | 485.76             |
| A_68_P25232272 | chr7:81159033-81159078                            | NM_009181:-487        | St8sia2    | PROMOTER               | 1.287                                                        | 0.291                          | 3581.87            | 1044.01            | 0.375                          | 2712.34            | 1017.60            |
| A_68_P24444428 | chr6:51419499-51419543                            | NM_016806:373         | Hnmpa2b1   | INSIDE                 | 1.287                                                        | 0.475                          | 1424.05            | 677.05             | 0.612                          | 1110.65            | 679.55             |
| A_68_P24428219 | chr6:48547191-48547235                            | NM_001079901:3331     | Repin1     | INSIDE                 | 1.287                                                        | 1.870                          | 1352.94            | 2529.51            | 2.405                          | 983.32             | 2365.22            |
| A_68_P23430519 | chr4:153674176-153674220                          | NM_001112744:-194     | Arhgef16   | PROMOTER               | 1.287                                                        | 0.188                          | 3389.84            | 636.21             | 0.242                          | 2489.16            | 601.41             |
| A_68_P20786426 | chr1:165924837-165924881                          | NM_201364:54          | BC055324   | INSIDE                 | 1.287                                                        | 0.469                          | 1721.65            | 807.48             | 0.604                          | 1362.76            | 822.82             |
| A_68_P20029520 | chr1:10983953-10983997                            | NM_029525:429         | Prex2      | INSIDE                 | 1.287                                                        | 0.314                          | 1592.01            | 499.55             | 0.404                          | 1229.65            | 496.47             |
| A_68_P31093845 | chr17:23957117-23957161                           | NM_175229:16985       | Srrm2      | INSIDE                 | 1.286                                                        | 1.860                          | 451.32             | 839.32             | 2.392                          | 346.38             | 828.63             |
| A_68_P30671880 | chr16:35735579-35735623                           | NM_153550:33842       | Dirc2      | INSIDE                 | 1.286                                                        | 1.726                          | 1610.02            | 2778.64            | 2.219                          | 1261.43            | 2798.70            |
| A_68_P30339720 | chr15:74630372-74630416                           | NM_029627:4           | Ly6k       | INSIDE                 | 1.286                                                        | 2.020                          | 1108.73            | 2239.87            | 2.598                          | 742.65             | 1929.31            |

| ProbeName      | Target position of probe on CpG island microarray | TargetID            | GeneSymbol    | CpG island Description | Ratio of relative methylation (TiO <sub>2</sub> -NP/Vehicle) | Sham group                     |                    |                    | TiO <sub>2</sub> -H group      |                    |                    |
|----------------|---------------------------------------------------|---------------------|---------------|------------------------|--------------------------------------------------------------|--------------------------------|--------------------|--------------------|--------------------------------|--------------------|--------------------|
|                |                                                   |                     |               |                        |                                                              | Relative methylation (Cy5/Cy3) | Cy3 signal (Input) | Cy5 signal (MeDIP) | Relative methylation (Cy5/Cy3) | Cy3 signal (Input) | Cy5 signal (MeDIP) |
| A_68_P30015973 | chr15:11313872-11313916                           | NM_033074:15519     | Tars          | INSIDE                 | 1.286                                                        | 1.941                          | 351.06             | 681.40             | 2.496                          | 286.84             | 715.96             |
| A_68_P28071861 | chr11:100948728-100948772                         | NM_001159384:147    | Mlx           | INSIDE                 | 1.286                                                        | 0.393                          | 2630.50            | 1033.17            | 0.505                          | 2104.17            | 1063.07            |
| A_68_P22753437 | chr4:16090490-16090534                            | NM_138952:133       | Ripk2         | INSIDE                 | 1.286                                                        | 0.322                          | 3967.53            | 1279.45            | 0.415                          | 2996.42            | 1242.91            |
| A_68_P20409777 | chr1:87914871-87914915                            | NM_027029:3624      | Spata3        | PROMOTER               | 1.286                                                        | 0.357                          | 2414.22            | 860.68             | 0.459                          | 1752.72            | 803.78             |
| A_68_P31110189 | chr17:26568886-26568930                           | NM_001081656:16999  | Neur11b       | INSIDE                 | 1.285                                                        | 1.833                          | 2342.37            | 4294.55            | 2.356                          | 1846.26            | 4350.00            |
| A_68_P28003593 | chr11:88922175-88922219                           | NM_019505:134       | Dgke          | PROMOTER               | 1.285                                                        | 0.150                          | 4029.39            | 606.34             | 0.193                          | 2730.09            | 527.72             |
| A_68_P27086292 | chr10:40604319-40604365                           | NM_031877:1003      | Wasf1         | INSIDE                 | 1.285                                                        | 3.335                          | 253.64             | 845.83             | 4.286                          | 180.46             | 773.54             |
| A_68_P26554291 | chr9:59451119-59451163                            | NM_175235:24997     | Celf6         | INSIDE                 | 1.285                                                        | 1.841                          | 737.69             | 1357.90            | 2.366                          | 634.13             | 1500.21            |
| A_68_P25597927 | chr7:150153952-150153996                          | NM_008554:1195      | Ascl2         | INSIDE                 | 1.285                                                        | 0.411                          | 3483.77            | 1431.55            | 0.528                          | 2633.06            | 1390.80            |
| A_68_P25581342 | chr7:147130697-147130741                          | NM_009482:964       | Utf1          | INSIDE                 | 1.285                                                        | 0.171                          | 2838.49            | 483.98             | 0.219                          | 1797.28            | 393.92             |
| A_68_P24385305 | chr6:39822036-39822080                            |                     | Unknown       |                        | 1.285                                                        | 0.357                          | 2133.78            | 761.15             | 0.458                          | 1493.78            | 684.69             |
| A_68_P23363215 | chr4:140857342-140857386                          | NM_010139:210       | Epha2         | INSIDE                 | 1.285                                                        | 0.438                          | 2947.70            | 1289.85            | 0.562                          | 2188.14            | 1229.93            |
| A_68_P32131187 | chr19:44322861-44322905                           | NM_024450:45105     | Scd3          | DOWNSTREAM             | 1.284                                                        | 0.326                          | 1587.01            | 517.06             | 0.418                          | 1310.55            | 548.28             |
| A_68_P30588527 | chr16:20620400-20620445                           | NM_028420:929       | Camk2n2       | INSIDE                 | 1.284                                                        | 0.125                          | 4137.73            | 519.10             | 0.161                          | 2515.72            | 405.37             |
| A_68_P27643050 | chr11:22759249-22759293                           | NM_016888:465       | B3gnt2        | INSIDE                 | 1.284                                                        | 0.290                          | 4004.32            | 1159.74            | 0.372                          | 2650.74            | 985.84             |
| A_68_P26020945 | chr8:87180658-87180702                            | NM_010499:6071      | Ier2          | DOWNSTREAM             | 1.284                                                        | 0.481                          | 1382.24            | 664.51             | 0.617                          | 1112.70            | 686.72             |
| A_68_P23637424 | chr5:42155415-42155459                            | NM_007524:23        | Nkx3-2        | INSIDE                 | 1.284                                                        | 0.308                          | 5211.60            | 1607.03            | 0.396                          | 3773.54            | 1494.42            |
| A_68_P27954543 | chr11:80291234-80291279                           | NM_009871:709       | Cdk5r1        | INSIDE                 | 1.283                                                        | 0.061                          | 7386.67            | 454.19             | 0.079                          | 4446.67            | 350.74             |
| A_68_P25458767 | chr7:125676796-125676840                          | NM_009940:9         | Coq7          | INSIDE                 | 1.283                                                        | 0.319                          | 1982.61            | 632.28             | 0.409                          | 1452.91            | 594.26             |
| A_68_P25394534 | chr7:112959304-112959348                          | NM_025301:275       | Mrpl17        | INSIDE                 | 1.283                                                        | 0.406                          | 1297.87            | 527.10             | 0.521                          | 990.48             | 515.91             |
| A_68_P25034847 | chr7:31852339-31852383                            | NM_144556:7407      | Lgi4          | INSIDE                 | 1.283                                                        | 1.565                          | 808.51             | 1265.61            | 2.009                          | 681.35             | 1368.60            |
| A_68_P23981083 | chr5:111082064-111082108                          | NM_153570:315       | Noc4l         | INSIDE                 | 1.283                                                        | 0.420                          | 1503.50            | 630.88             | 0.538                          | 1167.25            | 628.36             |
| A_68_P21870545 | chr2:173412385-173412429                          | NR_027957:72634     | Ppp4r11-ps    | INSIDE                 | 1.283                                                        | 2.392                          | 671.43             | 1605.84            | 3.068                          | 540.42             | 1657.78            |
| A_68_P32957266 | chr17:8477443-8477487                             | NM_018819:787       | Brp44l        | INSIDE                 | 1.282                                                        | 0.261                          | 2203.74            | 576.14             | 0.335                          | 1705.46            | 571.56             |
| A_68_P31258174 | chr17:56896255-56896299                           | NM_008738:677       | Nrtn          | INSIDE                 | 1.282                                                        | 7.823                          | 1462.06            | 11438.42           | 10.029                         | 1451.35            | 14555.22           |
| A_68_P30896823 | chr16:78577179-78577223                           | NM_025967:287       | D16Erd472e    | PROMOTER               | 1.282                                                        | 0.425                          | 1328.10            | 564.02             | 0.544                          | 1128.44            | 614.17             |
| A_68_P28696867 | chr12:104563817-104563863                         | NM_023049:30371     | Asb2          | INSIDE                 | 1.282                                                        | 6.426                          | 493.34             | 3170.14            | 8.241                          | 471.98             | 3889.61            |
| A_68_P26463562 | chr9:43551825-43551869                            | NM_021424:812       | Pvrl1         | PROMOTER               | 1.282                                                        | 1.704                          | 581.32             | 990.63             | 2.185                          | 423.46             | 925.26             |
| A_68_P25957635 | chr8:74108819-74108863                            | NM_011977:16015     | Sic27a1       | INSIDE                 | 1.282                                                        | 2.414                          | 808.79             | 1952.03            | 3.094                          | 690.38             | 2135.92            |
| A_68_P25351148 | chr7:104727864-104727908                          | NM_001177945:121    | 1810020D17Rik | INSIDE                 | 1.282                                                        | 0.240                          | 1993.20            | 478.36             | 0.308                          | 1385.99            | 426.46             |
| A_68_P24156971 | chr5:144288853-144288897                          | NM_009007:13        | Rac1          | PROMOTER               | 1.282                                                        | 0.455                          | 2436.32            | 1109.03            | 0.584                          | 1783.19            | 1040.78            |
| A_68_P24141307 | chr5:140894611-140894655                          | NM_133916:626       | Eif3b         | PROMOTER               | 1.282                                                        | 0.264                          | 1870.73            | 493.54             | 0.338                          | 1405.37            | 475.17             |
| A_68_P31790836 | chr18:67405160-67405204                           | NM_172630:302       | Mppe1         | INSIDE                 | 1.281                                                        | 0.431                          | 1295.46            | 557.75             | 0.551                          | 1082.04            | 596.58             |
| A_68_P27787485 | chr11:50048388-50048432                           | NM_145926:9574      | Mgat4b        | INSIDE                 | 1.281                                                        | 1.604                          | 749.61             | 1202.25            | 2.055                          | 632.99             | 1300.93            |
| A_68_P26844412 | chr9:114299556-114299600                          | NM_019922:252       | Crtap         | INSIDE                 | 1.281                                                        | 3.082                          | 371.68             | 1145.63            | 3.950                          | 305.72             | 1207.52            |
| A_68_P21866930 | chr2:172805522-172805566                          | NM_001083959:202    | Spo11         | INSIDE                 | 1.281                                                        | 2.460                          | 632.08             | 1554.93            | 3.151                          | 594.37             | 1872.98            |
| A_68_P21776626 | chr2:157193205-157193256                          | NM_026968:99        | Manbal        | PROMOTER               | 1.281                                                        | 2.217                          | 237.41             | 526.31             | 2.840                          | 206.99             | 587.83             |
| A_68_P28607920 | chr12:87420588-87420632                           | NM_009368:619       | Tgfb3         | DIVERGENT_PROMOTER     | 1.280                                                        | 0.450                          | 2154.58            | 968.91             | 0.575                          | 1626.10            | 935.74             |
| A_68_P22871359 | chr4:43395245-43395289                            | NM_001037709:413    | Rusc2         | INSIDE                 | 1.280                                                        | 0.284                          | 1891.64            | 538.15             | 0.364                          | 1339.95            | 488.11             |
| A_68_P20137271 | chr1:34234808-34234852                            | NM_133833:166161    | Dst           | INSIDE                 | 1.280                                                        | 3.833                          | 549.21             | 2105.12            | 4.907                          | 417.96             | 2050.91            |
| A_68_P31933382 | chr19:6241388-6241441                             | NM_194348:253       | Atg2a         | DIVERGENT_PROMOTER     | 1.279                                                        | 0.301                          | 1821.44            | 549.14             | 0.386                          | 1340.19            | 516.87             |
| A_68_P31849792 | chr18:78033867-78033918                           | NM_013831:604       | Pstpip2       | INSIDE                 | 1.279                                                        | 0.197                          | 2305.12            | 455.22             | 0.253                          | 1672.55            | 422.35             |
| A_68_P27673279 | chr11:29072650-29072694                           | NM_134034:234       | Smek2         | PROMOTER               | 1.279                                                        | 0.341                          | 1800.92            | 613.39             | 0.436                          | 1230.73            | 536.29             |
| A_68_P27172913 | chr10:59648822-59648866                           | NM_016803:33164     | Chst3         | INSIDE                 | 1.279                                                        | 1.934                          | 340.50             | 658.62             | 2.474                          | 308.66             | 763.60             |
| A_68_P31791018 | chr18:67449050-67449094                           | NM_053261:196       | Impa2         | INSIDE                 | 1.278                                                        | 0.219                          | 4323.62            | 948.96             | 0.280                          | 3072.70            | 861.75             |
| A_68_P31092364 | chr17:23695056-23695100                           | NM_001033496:6115   | Zfp213        | INSIDE                 | 1.278                                                        | 1.510                          | 792.94             | 1197.09            | 1.929                          | 669.21             | 1291.17            |
| A_68_P30350125 | chr15:76540600-76540644                           | NM_058214:367       | Recql4        | INSIDE                 | 1.278                                                        | 0.457                          | 1728.37            | 790.09             | 0.584                          | 1718.40            | 1004.22            |
| A_68_P28988894 | chr13:43295868-43295912                           | NM_001033399:103651 | Gfod1         | INSIDE                 | 1.278                                                        | 1.764                          | 658.97             | 1162.68            | 2.256                          | 553.59             | 1248.74            |
| A_68_P26543014 | chr9:57493074-57493118                            | NM_007783:109       | Csk           | PROMOTER               | 1.278                                                        | 0.376                          | 1434.76            | 539.82             | 0.481                          | 1187.15            | 570.99             |
| A_68_P23695550 | chr5:52957024-52957068                            | NM_144945:473       | Lgi2          | INSIDE                 | 1.278                                                        | 1.596                          | 495.76             | 791.18             | 2.040                          | 414.40             | 845.19             |
| A_68_P22485525 | chr3:122687267-122687311                          | NM_133857:77        | Usp53         | INSIDE                 | 1.278                                                        | 0.453                          | 2830.01            | 1283.15            | 0.580                          | 1917.23            | 1111.19            |
| A_68_P33015611 | chr1_random:49523-49567                           | NM_026866:135794    | Disp1         | INSIDE                 | 1.277                                                        | 1.732                          | 514.63             | 891.22             | 2.211                          | 397.01             | 877.97             |
| A_68_P31541309 | chr18:20904102-20904146                           | NM_019737:781       | B4galnt6      | INSIDE                 | 1.277                                                        | 0.164                          | 2801.93            | 459.79             | 0.210                          | 2045.35            | 428.73             |
| A_68_P31254017 | chr17:56263391-56263435                           | NM_013662:9863      | Sema6b        | INSIDE                 | 1.277                                                        | 1.542                          | 698.14             | 1076.52            | 1.970                          | 579.78             | 1141.95            |
| A_68_P28291796 | chr12:25516059-25516103                           | NM_001083341:383    | Mboat2        | PROMOTER               | 1.277                                                        | 2.399                          | 726.32             | 1742.45            | 3.063                          | 610.12             | 1868.69            |
| A_68_P27910560 | chr11:72080885-72080933                           | NM_001004148:802    | M13a5         | PROMOTER               | 1.277                                                        | 0.299                          | 1628.71            | 486.66             | 0.382                          | 1109.78            | 423.42             |
| A_68_P26519506 | chr9:53055980-53056024                            | NM_029936:215       | Ddx10         | INSIDE                 | 1.277                                                        | 0.452                          | 1361.38            | 615.41             | 0.577                          | 1064.27            | 614.19             |
| A_68_P25033085 | chr7:31514372-31514419                            | NM_027215:158       | Tmem147       | INSIDE                 | 1.277                                                        | 2.214                          | 633.90             | 1403.21            | 2.827                          | 590.43             | 1669.40            |
| A_68_P24863574 | chr6:134742286-134742330                          | NM_001048054:338    | Dusp16        | INSIDE                 | 1.277                                                        | 1.879                          | 749.47             | 1408.59            | 2.401                          | 618.43             | 1484.59            |
| A_68_P23297927 | chr4:129349792-129349836                          | NM_008468:197       | Kpna6         | INSIDE                 | 1.277                                                        | 0.318                          | 2263.69            | 719.89             | 0.406                          | 1664.09            | 675.86             |
| A_68_P26761639 | chr9:98886751-98886795                            | NM_001122851:19     | Faim          | PROMOTER               | 1.276                                                        | 0.231                          | 3458.83            | 797.74             | 0.294                          | 2734.99            | 805.03             |
| A_68_P24084082 | chr5:129107740-129107784                          | NM_175284:782       | Fzd10         | INSIDE                 | 1.276                                                        | 0.188                          | 2724.39            | 512.14             | 0.240                          | 2004.73            | 480.80             |
| A_68_P21070952 | chr2:25118487-25118531                            | NM_175286:391       | Tpm           | INSIDE                 | 1.276                                                        | 0.449                          | 2631.15            | 1182.13            | 0.573                          | 1863.52            | 1068.34            |
| A_68_P20826000 | chr1:172995096-172995140                          | NM_010188:5584      | Fcgr3         | PROMOTER               | 1.276                                                        | 1.546                          | 17985.76           | 27810.48           | 1.972                          | 13452.32           | 26533.76           |
| A_68_P31929125 | chr19:5503714-5503758                             | NM_023781:51        | 1700020D05Rik | INSIDE                 | 1.275                                                        | 1.634                          | 795.13             | 1299.02            | 2.083                          | 617.86             | 1287.26            |

| ProbeName      | Target position of probe on CpG island microarray | TargetID                 | GeneSymbol    | CpG island Description | Ratio of relative methylation (TiO <sub>2</sub> -NP/Vehicle) | Sham group                     |                    |                    | TiO <sub>2</sub> -H group      |                    |                    |
|----------------|---------------------------------------------------|--------------------------|---------------|------------------------|--------------------------------------------------------------|--------------------------------|--------------------|--------------------|--------------------------------|--------------------|--------------------|
|                |                                                   |                          |               |                        |                                                              | Relative methylation (Cy5/Cy3) | Cy3 signal (Input) | Cy5 signal (MeDIP) | Relative methylation (Cy5/Cy3) | Cy3 signal (Input) | Cy5 signal (MeDIP) |
| A_68_P31075037 | chr17:17964256-17964300                           | NR_029536:-2873          | Mir99b        | PROMOTER               | 1.275                                                        | 0.308                          | 2779.43            | 857.07             | 0.393                          | 2166.23            | 851.61             |
| A_68_P30657580 | chr16:33381562-33381606                           | NM_011749:724            | Zfp148        | INSIDE                 | 1.275                                                        | 0.384                          | 4590.60            | 1762.98            | 0.490                          | 3259.30            | 1596.15            |
| A_68_P26347005 | chr9:21216579-21216623                            | NM_021888:320            | Qtrt1         | INSIDE                 | 1.275                                                        | 0.465                          | 1751.96            | 814.52             | 0.593                          | 1327.31            | 786.69             |
| A_68_P25022015 | chr7:29243791-29243835                            | NM_001141921:6556        | Lrfln1        | INSIDE                 | 1.275                                                        | 1.441                          | 954.11             | 1374.77            | 1.838                          | 788.00             | 1448.07            |
| A_68_P25018411 | chr7:28443445-28443489                            | NM_001081292:16151       | Map3k10       | INSIDE                 | 1.275                                                        | 2.548                          | 3688.85            | 9399.74            | 3.248                          | 2862.10            | 9296.56            |
| A_68_P23240688 | chr4:118159059-118159103                          | NM_011587:3374           | Tie1          | INSIDE                 | 1.275                                                        | 1.656                          | 1322.60            | 2189.96            | 2.112                          | 1023.93            | 2162.20            |
| A_68_P21842274 | chr2:168396695-168396739                          | NM_001136073:18975       | Nfatc2        | INSIDE                 | 1.275                                                        | 2.976                          | 520.82             | 1549.77            | 3.793                          | 507.12             | 1923.28            |
| A_68_P30370807 | chr15:80041905-80041949                           | NM_010795:37776          | Mgat3         | INSIDE                 | 1.274                                                        | 1.606                          | 1226.96            | 1971.10            | 2.046                          | 930.84             | 1904.76            |
| A_68_P29054504 | chr13:55452758-55452802                           | NM_025828:11364          | Lman2         | INSIDE                 | 1.274                                                        | 1.606                          | 754.51             | 1211.43            | 2.046                          | 626.17             | 1281.32            |
| A_68_P23968432 | chr5:108153037-108153081                          | NM_010278:305            | Gfi1          | INSIDE                 | 1.274                                                        | 0.258                          | 2832.74            | 731.96             | 0.329                          | 2163.89            | 712.33             |
| A_68_P23185132 | chr4:106233810-106233854                          | NM_053272:190            | Dher24        | INSIDE                 | 1.274                                                        | 0.293                          | 2432.47            | 712.60             | 0.373                          | 1584.16            | 591.14             |
| A_68_P31620976 | chr18:36093025-36093069                           |                          |               | Unknown                | 1.273                                                        | 0.167                          | 5962.18            | 996.05             | 0.213                          | 4266.32            | 907.07             |
| A_68_P30377738 | chr15:81230455-81230499                           | NM_177310:-141           | Xpnp3         | DIVERGENT_PROMOTER     | 1.273                                                        | 0.281                          | 3522.27            | 990.07             | 0.358                          | 2530.65            | 905.55             |
| A_68_P27267071 | chr10:76728631-76728675                           | NM_030262:6608           | Pofut2        | INSIDE                 | 1.273                                                        | 1.685                          | 853.54             | 1438.16            | 2.145                          | 751.24             | 1611.12            |
| A_68_P24176178 | chr5:148674084-148674130                          | NM_025624:1903           | Pomp          | INSIDE                 | 1.273                                                        | 1.647                          | 656.54             | 1081.44            | 2.096                          | 444.26             | 931.25             |
| A_68_P21070912 | chr2:25110973-25111017                            | NM_177344:36             | Tmem203       | INSIDE                 | 1.273                                                        | 0.230                          | 2138.54            | 492.65             | 0.293                          | 1657.71            | 486.30             |
| A_68_P20411732 | chr1:88256159-88256203                            | NR_015507:32             | C130036L24Rik | INSIDE                 | 1.273                                                        | 0.223                          | 3192.90            | 711.14             | 0.283                          | 2197.17            | 622.76             |
| A_68_P29614297 | chr14:55400013-55400059                           | NM_016972:687            | Slc7a8        | INSIDE                 | 1.272                                                        | 0.498                          | 1677.79            | 835.64             | 0.633                          | 1200.52            | 760.33             |
| A_68_P26834222 | chr9:112137879-112137923                          | NM_001177619:-555        | Arpp21        | PROMOTER               | 1.272                                                        | 0.299                          | 1718.53            | 513.99             | 0.380                          | 1399.79            | 532.48             |
| A_68_P23308590 | chr4:131393615-131393659                          | NM_001083119:557         | Ptpnru        | INSIDE                 | 1.272                                                        | 0.229                          | 1977.61            | 452.84             | 0.291                          | 1475.58            | 429.66             |
| A_68_P22394202 | chr3:104764921-104764965                          | NM_009520:-315           | Wnt2b         | PROMOTER               | 1.272                                                        | 0.299                          | 1664.44            | 498.31             | 0.381                          | 1264.57            | 481.60             |
| A_68_P22291219 | chr3:84284726-84284770                            | NM_001033301:-387        | Fhdc1         | PROMOTER               | 1.272                                                        | 0.333                          | 2056.45            | 685.42             | 0.424                          | 1599.67            | 678.00             |
| A_68_P28745895 | chr12:112997453-112997497                         | NM_008450:415            | Klrs1         | INSIDE                 | 1.271                                                        | 0.251                          | 5195.71            | 1304.49            | 0.319                          | 3738.17            | 1193.14            |
| A_68_P25736230 | chr8:28153302-28153346                            | NM_001039077:298         | Prosc         | INSIDE                 | 1.271                                                        | 0.164                          | 9119.77            | 1494.09            | 0.208                          | 6244.35            | 1300.47            |
| A_68_P25087543 | chr7:51716772-51716816                            | NM_198250:18938          | Lrrc4b        | INSIDE                 | 1.271                                                        | 1.907                          | 1340.41            | 2556.81            | 2.424                          | 1156.96            | 2804.00            |
| A_68_P23952344 | chr5:104888893-104888937                          | NM_008861:439            | Pkd2          | INSIDE                 | 1.271                                                        | 1.604                          | 607.89             | 974.87             | 2.038                          | 498.79             | 1016.41            |
| A_68_P31254442 | chr17:56323432-56323476                           | NM_080837:-111           | D17Wsu104e    | PROMOTER               | 1.270                                                        | 0.167                          | 2904.84            | 484.32             | 0.212                          | 2151.05            | 455.50             |
| A_68_P26372146 | chr9:26541704-26541748                            | ENSMUST00000067362:291   |               | INSIDE                 | 1.270                                                        | 0.415                          | 3385.70            | 1405.32            | 0.527                          | 2388.41            | 1258.99            |
| A_68_P25094514 | chr7:52949352-52949396                            | NM_001033356:9591        | Ntn5          | INSIDE                 | 1.270                                                        | 2.907                          | 819.72             | 2382.83            | 3.691                          | 589.76             | 2176.90            |
| A_68_P23197627 | chr4:108453252-108453296                          | ENSMUST00000106658:-166  |               | PROMOTER               | 1.270                                                        | 1.911                          | 885.84             | 1693.23            | 2.427                          | 736.90             | 1788.82            |
| A_68_P31256421 | chr17:56613568-56613612                           | NM_011218:2313           | Ptprs         | INSIDE                 | 1.269                                                        | 0.304                          | 2060.58            | 626.04             | 0.386                          | 1476.99            | 569.50             |
| A_68_P29480509 | chr14:26746634-26746678                           | NM_025311:80             | D14Ert449e    | INSIDE                 | 1.269                                                        | 0.149                          | 4005.12            | 595.77             | 0.189                          | 2871.46            | 541.93             |
| A_68_P26240286 | chr8:126038854-126038898                          | NM_001170976:479         | Dbn1d1        | INSIDE                 | 1.269                                                        | 0.448                          | 1620.05            | 726.32             | 0.569                          | 1214.65            | 690.94             |
| A_68_P26065130 | chr8:94880881-94880925                            | NM_018826:-792           | Irx5          | DIVERGENT_PROMOTER     | 1.269                                                        | 0.139                          | 4720.07            | 654.40             | 0.176                          | 3087.10            | 543.25             |
| A_68_P23340286 | chr4:137074294-137074338                          | NM_008305:49599          | Hspg2         | INSIDE                 | 1.269                                                        | 1.833                          | 779.09             | 1427.74            | 2.325                          | 639.69             | 1487.53            |
| A_68_P32140500 | chr19:45857855-45857899                           | NM_023799:-95            | Mgea5         | PROMOTER               | 1.268                                                        | 9.578                          | 863.69             | 8272.36            | 12.146                         | 648.07             | 7871.67            |
| A_68_P26559434 | chr9:60369978-60370022                            | ENSMUST00000140824:-147  |               | PROMOTER               | 1.268                                                        | 2.501                          | 373.98             | 935.18             | 3.171                          | 331.95             | 1052.62            |
| A_68_P26169910 | chr8:114255749-114255793                          | NM_001198839:266         | Bear1         | INSIDE                 | 1.268                                                        | 1.805                          | 987.26             | 1781.87            | 2.288                          | 830.61             | 1900.60            |
| A_68_P32543773 | chrX:93291458-93291502                            | NM_010833:97             | Msn           | INSIDE                 | 1.267                                                        | 0.292                          | 1655.31            | 484.14             | 0.371                          | 2463.02            | 913.07             |
| A_68_P29683699 | chr14:67854572-67854616                           | NM_010095:2466           | Ebf2          | INSIDE                 | 1.267                                                        | 0.408                          | 2269.28            | 926.45             | 0.517                          | 1642.47            | 849.66             |
| A_68_P28301679 | chr12:27099772-27099816                           | NM_001081977:327         | Rnf144a       | INSIDE                 | 1.267                                                        | 0.350                          | 3556.01            | 1245.88            | 0.444                          | 2575.57            | 1143.47            |
| A_68_P27243858 | chr10:72562474-72562518                           | ENSMUST00000053544:295   |               | INSIDE                 | 1.267                                                        | 1.471                          | 1057.77            | 1556.20            | 1.864                          | 808.17             | 1506.55            |
| A_68_P27181839 | chr10:61158255-61158299                           | NM_027912:15             | Tysnd1        | INSIDE                 | 1.267                                                        | 0.294                          | 1721.17            | 505.32             | 0.372                          | 1461.03            | 543.66             |
| A_68_P24248438 | chr6:13628084-13628128                            | NM_175312:-140           | B630005N14Rik | PROMOTER               | 1.267                                                        | 0.341                          | 3320.98            | 1132.48            | 0.432                          | 2545.64            | 1099.81            |
| A_68_P23335296 | chr4:136249920-136249964                          | NM_010142:141908         | Ephb2         | INSIDE                 | 1.267                                                        | 1.676                          | 821.11             | 1376.27            | 2.123                          | 654.20             | 1388.74            |
| A_68_P23185611 | chr4:106311721-106311765                          | NM_177667:16689          | Ttc22         | INSIDE                 | 1.267                                                        | 2.008                          | 820.24             | 1647.08            | 2.543                          | 625.22             | 1590.12            |
| A_68_P21752415 | chr2:152840795-152840839                          | NM_178939:303            | Pdrg1         | INSIDE                 | 1.267                                                        | 0.217                          | 2239.70            | 486.90             | 0.275                          | 1553.48            | 427.89             |
| A_68_P32104298 | chr19:39005890-39005934                           | NM_008234:433            | Hells         | INSIDE                 | 1.266                                                        | 0.349                          | 1258.99            | 439.77             | 0.442                          | 944.15             | 417.59             |
| A_68_P30345339 | chr15:75824110-75824154                           | NM_177922:-66            | Mapk15        | PROMOTER               | 1.266                                                        | 1.703                          | 1001.21            | 1705.03            | 2.156                          | 730.35             | 1574.79            |
| A_68_P28091895 | chr11:104469498-104469542                         | NM_016780:207            | Iitg3         | INSIDE                 | 1.266                                                        | 0.119                          | 4531.19            | 537.04             | 0.150                          | 3158.81            | 473.97             |
| A_68_P26203092 | chr8:120022171-120022215                          | NM_172285:2              | Picg2         | INSIDE                 | 1.266                                                        | 0.402                          | 1291.65            | 519.73             | 0.509                          | 957.00             | 487.42             |
| A_68_P23339578 | chr4:136944088-136944132                          | ENSMUST00000078305:-7097 |               | PROMOTER               | 1.266                                                        | 0.326                          | 1635.56            | 532.88             | 0.413                          | 1271.58            | 524.53             |
| A_68_P31092624 | chr17:23747448-23747492                           | NM_001033425:9648        | Zscan10       | INSIDE                 | 1.265                                                        | 1.409                          | 2169.51            | 3057.70            | 1.783                          | 1615.22            | 2879.77            |
| A_68_P26215510 | chr8:122223902-122223946                          | NM_026922:16             | Atp2c2        | INSIDE                 | 1.265                                                        | 2.462                          | 673.10             | 1657.07            | 3.113                          | 458.97             | 1428.96            |
| A_68_P25144267 | chr7:63217811-63217855                            | NM_023647:-12            | Nipa2         | DIVERGENT_PROMOTER     | 1.265                                                        | 0.315                          | 2262.49            | 713.05             | 0.399                          | 1595.64            | 636.27             |
| A_68_P20937463 | chr1:193150081-193150125                          | NM_025864:259            | Tmem206       | INSIDE                 | 1.265                                                        | 0.263                          | 4424.89            | 1163.49            | 0.333                          | 3106.46            | 1033.42            |
| A_68_P20228140 | chr1:52687403-52687448                            | NM_001142647:-123        | Tmem194b      | PROMOTER               | 1.265                                                        | 1.701                          | 1341.73            | 2281.84            | 2.151                          | 1109.52            | 2386.35            |
| A_68_P27674921 | chr11:29426434-29426478                           | NM_133767:0              | Mtif2         | INSIDE                 | 1.264                                                        | 0.247                          | 2329.84            | 575.37             | 0.312                          | 1717.06            | 536.06             |
| A_68_P27083323 | chr10:40020837-40020881                           | NM_007444:1134           | Amd2          | INSIDE                 | 1.264                                                        | 0.333                          | 1838.49            | 612.25             | 0.421                          | 1345.20            | 566.27             |
| A_68_P25285284 | chr7:91030916-91030960                            | NM_030705:1913           | Mesdc1        | INSIDE                 | 1.264                                                        | 1.537                          | 1167.91            | 1794.53            | 1.942                          | 912.99             | 1773.30            |
| A_68_P24008164 | chr5:115608110-115608154                          | NM_175403:53             | Mlec          | INSIDE                 | 1.264                                                        | 0.286                          | 1983.70            | 567.77             | 0.362                          | 1546.42            | 559.61             |
| A_68_P23311150 | chr4:131864462-131864506                          | NR_029468:-108           | Snhg12        | DIVERGENT_PROMOTER     | 1.264                                                        | 0.428                          | 1302.02            | 557.06             | 0.541                          | 1015.30            | 548.91             |
| A_68_P23240958 | chr4:118214708-118214752                          | NM_172383:1601           | Tmem125       | INSIDE                 | 1.264                                                        | 2.005                          | 1377.65            | 2762.51            | 2.534                          | 1014.47            | 2571.00            |
| A_68_P21261721 | chr2:60800858-60800902                            | NM_020296:381            | Rbms1         | INSIDE                 | 1.264                                                        | 2.191                          | 697.80             | 1528.96            | 2.769                          | 601.69             | 1666.26            |
| A_68_P31791665 | chr18:67561243-67561287                           | NM_026473:10880          | Tubb6         | INSIDE                 | 1.263                                                        | 1.567                          | 1129.96            | 1770.95            | 1.979                          | 833.98             | 1650.65            |

| ProbeName      | Target position of probe on CpG island microarray | TargetID               | GeneSymbol    | CpG island Description | Ratio of relative methylation (TiO <sub>2</sub> -NP/Vehicle) | Sham group                     |                    |                    | TiO <sub>2</sub> -H group      |                    |                    |
|----------------|---------------------------------------------------|------------------------|---------------|------------------------|--------------------------------------------------------------|--------------------------------|--------------------|--------------------|--------------------------------|--------------------|--------------------|
|                |                                                   |                        |               |                        |                                                              | Relative methylation (Cy5/Cy3) | Cy3 signal (Input) | Cy5 signal (MeDIP) | Relative methylation (Cy5/Cy3) | Cy3 signal (Input) | Cy5 signal (MeDIP) |
| A_68_P28863269 | chr13:19715200-19715245                           | NM_016687:179          | Sfrp4         | INSIDE                 | 1.263                                                        | 2.339                          | 303.53             | 709.88             | 2.953                          | 226.36             | 668.44             |
| A_68_P27255928 | chr10:74779853-74779897                           | NM_009630:187          | Adora2a       | INSIDE                 | 1.263                                                        | 0.497                          | 3628.86            | 1804.15            | 0.628                          | 2809.92            | 1764.39            |
| A_68_P25265199 | chr7:87331654-87331698                            | NM_013659:-50          | Sema4b        | PROMOTER               | 1.263                                                        | 0.350                          | 1342.94            | 470.59             | 0.442                          | 1034.99            | 457.95             |
| A_68_P22281942 | chr3:82707839-82707883                            | NM_023624:36           | Lrat          | INSIDE                 | 1.263                                                        | 0.172                          | 6596.99            | 1136.54            | 0.218                          | 4538.71            | 987.30             |
| A_68_P21818285 | chr2:164333404-164333448                          | NM_133779:10402        | Pigt          | INSIDE                 | 1.263                                                        | 1.879                          | 1019.02            | 1914.90            | 2.373                          | 854.88             | 2029.01            |
| A_68_P32326386 | chrX:35474728-35474772                            | NM_001185002:734       | Rhox13        | INSIDE                 | 1.262                                                        | 2.173                          | 338.99             | 736.47             | 2.741                          | 458.94             | 1257.81            |
| A_68_P29094230 | chr13:63673702-63673746                           | NM_008957:-6896        | Ptchl1        | PROMOTER               | 1.262                                                        | 0.417                          | 1214.88            | 506.68             | 0.527                          | 968.06             | 509.72             |
| A_68_P29040996 | chr13:53024696-53024740                           | NM_016709:328          | Auh           | INSIDE                 | 1.262                                                        | 0.260                          | 2543.90            | 661.78             | 0.328                          | 1831.51            | 601.19             |
| A_68_P26844288 | chr9:114277438-114277482                          | NM_019922:22370        | Crtap         | DOWNSTREAM             | 1.262                                                        | 0.339                          | 1596.67            | 540.48             | 0.427                          | 1248.47            | 533.29             |
| A_68_P21612304 | chr2:127073616-127073660                          | NM_175145:-72          | Tmem127       | DIVERGENT_PROMOTER     | 1.262                                                        | 22.276                         | 4925.41            | 109718.40          | 28.102                         | 4844.06            | 136126.50          |
| A_68_P28054684 | chr1:198010545-98010589                           | NM_028149:364          | Fbxl20        | INSIDE                 | 1.261                                                        | 0.132                          | 3676.24            | 484.96             | 0.166                          | 2954.94            | 491.56             |
| A_68_P24658387 | chr6:94650132-94650176                            | NM_008377:-15          | Lrig1         | PROMOTER               | 1.261                                                        | 0.400                          | 1487.67            | 595.03             | 0.504                          | 1174.16            | 592.05             |
| A_68_P22417419 | chr3:109143833-109143877                          | NM_020505:254          | Vav3          | INSIDE                 | 1.261                                                        | 1.792                          | 823.83             | 1476.30            | 2.259                          | 689.86             | 1558.42            |
| A_68_P20156459 | chr1:37947346-37947390                            | NM_027098:-29          | Mrp130        | DIVERGENT_PROMOTER     | 1.261                                                        | 0.536                          | 2466.79            | 1321.06            | 0.675                          | 1947.93            | 1315.04            |
| A_68_P32140229 | chr19:45817346-45817390                           | NM_001166361:6         | Fgf8          | INSIDE                 | 1.260                                                        | 2.516                          | 1166.78            | 2936.02            | 3.170                          | 969.53             | 3073.40            |
| A_68_P29032310 | chr13:51503858-51503902                           | NM_010101:-106         | Slpr3         | PROMOTER               | 1.260                                                        | 6.755                          | 929.95             | 6282.22            | 8.512                          | 687.76             | 5854.52            |
| A_68_P28936822 | chr13:34222312-34222356                           | NM_023716:-111         | Tubb2b        | PROMOTER               | 1.260                                                        | 0.147                          | 5168.74            | 761.52             | 0.186                          | 2944.71            | 546.61             |
| A_68_P25957752 | chr8:74126620-74126664                            | NM_001166213:5098      | Fam129c       | INSIDE                 | 1.260                                                        | 0.303                          | 1801.91            | 545.62             | 0.381                          | 1362.17            | 519.55             |
| A_68_P20508928 | chr7:52125095-52125139                            | NM_133949:42           | Ptov1         | INSIDE                 | 1.260                                                        | 1.361                          | 1690.20            | 2299.80            | 1.714                          | 1334.15            | 2287.01            |
| A_68_P24620314 | chr6:88143770-88143814                            | NM_008090:-4865        | Gata2         | PROMOTER               | 1.260                                                        | 0.233                          | 2086.67            | 486.58             | 0.294                          | 1619.18            | 475.81             |
| A_68_P24519509 | chr6:66986858-66986902                            | NM_007836:521          | Gadd45a       | INSIDE                 | 1.260                                                        | 0.464                          | 2689.34            | 1248.13            | 0.585                          | 1857.87            | 1086.08            |
| A_68_P23441291 | chr4:155266628-155266672                          | NM_207223:667          | Acap3         | INSIDE                 | 1.260                                                        | 0.390                          | 1366.95            | 532.62             | 0.491                          | 1001.80            | 492.01             |
| A_68_P30721027 | chr16:44347501-44347545                           | NM_144550:9            | Spice1        | INSIDE                 | 1.259                                                        | 0.361                          | 1438.86            | 520.15             | 0.455                          | 1143.31            | 520.37             |
| A_68_P30402710 | chr15:85565486-85565530                           | NM_001113418:-485      | Ppara         | PROMOTER               | 1.259                                                        | 0.417                          | 2390.10            | 996.93             | 0.525                          | 1784.97            | 937.67             |
| A_68_P29134804 | chr13:72766185-72766229                           | NR_030701:-194         | D430050G20    | DIVERGENT_PROMOTER     | 1.259                                                        | 0.355                          | 2032.48            | 721.40             | 0.447                          | 1492.76            | 667.19             |
| A_68_P28743717 | chr12:112615357-112615401                         | NM_183016:551          | Cdc42bbp      | INSIDE                 | 1.259                                                        | 7.915                          | 1249.34            | 9888.00            | 9.966                          | 1085.67            | 10819.89           |
| A_68_P27956332 | chr1:180593019-80593063                           | NM_177390:487          | Myo1d         | INSIDE                 | 1.259                                                        | 0.151                          | 3686.11            | 555.27             | 0.190                          | 2557.01            | 485.07             |
| A_68_P26873360 | chr9:119488455-119488499                          | NM_021544:-342         | Scn5a         | PROMOTER               | 1.259                                                        | 0.397                          | 4633.05            | 1839.55            | 0.500                          | 3115.63            | 1557.49            |
| A_68_P26551402 | chr9:58884501-58884545                            | NM_001042752:-274      | Neo1          | PROMOTER               | 1.259                                                        | 1.696                          | 1990.17            | 3375.82            | 2.136                          | 1599.97            | 3418.12            |
| A_68_P24995079 | chr7:20334543-20334587                            | NM_008990:358          | Pvrl2         | INSIDE                 | 1.259                                                        | 0.424                          | 1201.90            | 509.40             | 0.534                          | 999.24             | 533.12             |
| A_68_P23416138 | chr4:151406540-151406584                          | NM_031867:6037         | Tas1r1        | INSIDE                 | 1.259                                                        | 1.405                          | 1302.93            | 1830.74            | 1.769                          | 1022.31            | 1808.96            |
| A_68_P22339769 | chr3:94386307-94386351                            | NM_029721:296          | Smx27         | INSIDE                 | 1.259                                                        | 0.108                          | 4724.52            | 511.45             | 0.136                          | 3256.64            | 443.94             |
| A_68_P20433333 | chr1:91889782-91889826                            | NM_139152:21348        | Asb18         | INSIDE                 | 1.259                                                        | 1.528                          | 756.04             | 1155.13            | 1.924                          | 594.54             | 1144.01            |
| A_68_P32977629 | A_68_P32977629                                    |                        |               | Unknown                | 1.258                                                        | 2.209                          | 3058.50            | 6755.03            | 2.778                          | 1640.70            | 4557.60            |
| A_68_P32533203 | chrX:90534565-90534609                            | NM_007492:2602         | Arx           | INSIDE                 | 1.258                                                        | 1.845                          | 486.23             | 897.00             | 2.320                          | 710.57             | 1648.57            |
| A_68_P30370811 | chr15:80042269-80042313                           | NM_010795:38140        | Mgat3         | INSIDE                 | 1.258                                                        | 2.410                          | 1012.24            | 2439.21            | 3.030                          | 816.61             | 2474.61            |
| A_68_P30083239 | chr15:25711450-25711494                           | NM_019472:159168       | Myo10         | INSIDE                 | 1.258                                                        | 2.328                          | 263.90             | 614.30             | 2.928                          | 231.30             | 677.14             |
| A_68_P27594246 | chr11:11926108-11926153                           | NM_001177629:1844      | Grb10         | INSIDE                 | 1.258                                                        | 2.066                          | 2282.26            | 4716.21            | 2.600                          | 1727.04            | 4490.68            |
| A_68_P26467961 | chr9:44306644-44306688                            | NM_030256:-552         | Bcl9l         | PROMOTER               | 1.258                                                        | 0.329                          | 1891.32            | 621.89             | 0.414                          | 1135.06            | 469.69             |
| A_68_P26254624 | chr8:128434410-128434454                          | NM_145608:83           | BC021891      | INSIDE                 | 1.258                                                        | 0.197                          | 4504.68            | 889.36             | 0.248                          | 3138.93            | 779.85             |
| A_68_P25181448 | chr7:72301812-72301856                            | NM_183087:-420         | Fam189a1      | PROMOTER               | 1.258                                                        | 0.166                          | 3362.16            | 557.37             | 0.209                          | 2381.53            | 496.77             |
| A_68_P23544554 | chr5:24414480-24414524                            | NM_001170555:-175      | Prkg2         | PROMOTER               | 1.258                                                        | 1.802                          | 372.05             | 670.61             | 2.268                          | 316.36             | 717.42             |
| A_68_P23227951 | chr4:115817250-115817294                          | NM_026547:-51          | 1520402A15Rik | DIVERGENT_PROMOTER     | 1.258                                                        | 0.462                          | 1519.10            | 701.25             | 0.581                          | 1226.04            | 711.94             |
| A_68_P20644035 | chr1:138028029-138028073                          | NM_001039472:73        | Kif21b        | INSIDE                 | 1.258                                                        | 1.440                          | 882.36             | 1270.76            | 1.811                          | 688.69             | 1247.37            |
| A_68_P28099128 | chr11:105880140-105880184                         | NM_001037712:10646     | Kcnh6         | INSIDE                 | 1.257                                                        | 1.468                          | 679.35             | 996.99             | 1.845                          | 556.19             | 1026.37            |
| A_68_P25833939 | chr8:47120895-47120939                            | NM_207213:88584        | Smx25         | INSIDE                 | 1.257                                                        | 1.486                          | 629.31             | 934.92             | 1.867                          | 604.73             | 1128.89            |
| A_68_P25097405 | chr7:53435026-53435070                            | NM_011510:355          | Abcc8         | INSIDE                 | 1.257                                                        | 0.499                          | 1889.96            | 943.33             | 0.627                          | 1467.15            | 920.14             |
| A_68_P23398659 | chr4:148473653-148473697                          | NM_019781:247          | Pex14         | INSIDE                 | 1.257                                                        | 2.427                          | 1003.36            | 2434.82            | 3.050                          | 984.08             | 3001.20            |
| A_68_P22855812 | chr4:40090603-40090647                            | NM_007386:327          | Aco1          | INSIDE                 | 1.257                                                        | 0.435                          | 1213.29            | 527.46             | 0.546                          | 956.17             | 522.44             |
| A_68_P22185878 | chr3:61962959-61963003                            |                        |               | Unknown                | 1.257                                                        | 2.196                          | 506.59             | 1112.43            | 2.760                          | 433.68             | 1196.76            |
| A_68_P20319167 | chr1:69423580-69423624                            |                        |               | Unknown                | 1.257                                                        | 1.702                          | 750.79             | 1277.49            | 2.139                          | 708.41             | 1515.62            |
| A_68_P31655787 | chr18:42671213-42671257                           | NM_001039474:94        | Tcerg1        | INSIDE                 | 1.256                                                        | 0.201                          | 2692.25            | 540.73             | 0.252                          | 2063.25            | 520.34             |
| A_68_P30364132 | chr15:78893377-78893421                           | NM_144849:-109         | Ankrd54       | PROMOTER               | 1.256                                                        | 0.453                          | 1273.00            | 576.60             | 0.569                          | 995.12             | 566.07             |
| A_68_P30093796 | chr15:27595252-27595296                           | NM_198301:15979        | Fam105a       | INSIDE                 | 1.256                                                        | 0.458                          | 1644.42            | 753.14             | 0.575                          | 1234.71            | 710.48             |
| A_68_P26465906 | chr9:43942731-43942775                            | NM_023601:12           | Mcam          | INSIDE                 | 1.256                                                        | 0.413                          | 1280.28            | 529.07             | 0.519                          | 1030.78            | 535.01             |
| A_68_P24059412 | chr5:124571591-124571635                          | NM_011256:94815        | Pitpmn2       | INSIDE                 | 1.256                                                        | 2.461                          | 943.34             | 2321.27            | 3.089                          | 747.58             | 2309.57            |
| A_68_P23576669 | chr5:31440849-31440893                            | NM_021290:398          | Ucn           | INSIDE                 | 1.256                                                        | 1.686                          | 647.64             | 1091.72            | 2.117                          | 452.53             | 957.99             |
| A_68_P23364638 | chr4:141092840-141092884                          | NM_019763:1650         | Spn           | INSIDE                 | 1.256                                                        | 0.282                          | 1658.06            | 467.41             | 0.354                          | 1166.32            | 412.89             |
| A_68_P23336494 | chr4:136436600-136436644                          | NM_009777:5470         | Clqb          | INSIDE                 | 1.256                                                        | 2.062                          | 660.32             | 1361.29            | 2.589                          | 561.21             | 1453.18            |
| A_68_P23255468 | chr4:120887443-120887487                          | ENSMUST00000056635:225 |               | INSIDE                 | 1.256                                                        | 0.246                          | 3324.90            | 816.36             | 0.308                          | 2472.47            | 762.23             |
| A_68_P20997455 | chr2:9799133-9799177                              | NM_008091:1073         | Gata3         | INSIDE                 | 1.256                                                        | 1.619                          | 1747.55            | 2828.95            | 2.033                          | 1216.60            | 2473.06            |
| A_68_P32454246 | chrX:68808773-68808817                            | NM_008253:-373         | Hmgb3         | PROMOTER               | 1.255                                                        | 2.507                          | 752.58             | 1886.53            | 3.147                          | 1038.59            | 3268.66            |
| A_68_P31140915 | chr17:31773909-31773953                           | NM_178224:146          | Cbs           | INSIDE                 | 1.255                                                        | 0.468                          | 2094.34            | 980.32             | 0.587                          | 1720.97            | 1011.05            |
| A_68_P22030513 | chr3:30755322-30755366                            | NM_001134385:473       | Gpr160        | INSIDE                 | 1.255                                                        | 0.333                          | 2314.28            | 770.84             | 0.418                          | 1651.80            | 690.56             |
| A_68_P28924077 | chr13:31718533-31718577                           | NM_010225:870          | Foxf2         | INSIDE                 | 1.254                                                        | 0.331                          | 1624.25            | 538.43             | 0.416                          | 1143.30            | 475.39             |

| ProbeName      | Target position of probe on CpG island microarray | TargetID                | GeneSymbol    | CpG island Description | Ratio of relative methylation (TiO <sub>2</sub> -NP/Vehicle) | Sham group                     |                    |                    | TiO <sub>2</sub> -H group      |                    |                    |
|----------------|---------------------------------------------------|-------------------------|---------------|------------------------|--------------------------------------------------------------|--------------------------------|--------------------|--------------------|--------------------------------|--------------------|--------------------|
|                |                                                   |                         |               |                        |                                                              | Relative methylation (Cy5/Cy3) | Cy3 signal (Input) | Cy5 signal (MeDIP) | Relative methylation (Cy5/Cy3) | Cy3 signal (Input) | Cy5 signal (MeDIP) |
| A_68_P28178206 | chr11:119352324-119352368                         | NM_001164636:-314       | A730011L01Rik | PROMOTER               | 1.254                                                        | 0.450                          | 1641.13            | 739.09             | 0.565                          | 1074.32            | 606.50             |
| A_68_P26003886 | chr8:83866274-83866319                            | ENSMUST00000172167:-158 |               | PROMOTER               | 1.254                                                        | 0.311                          | 1555.23            | 483.97             | 0.390                          | 1232.39            | 481.02             |
| A_68_P25952415 | chr8:73046804-73046848                            | NM_029366:253           | 2810422J05Rik | INSIDE                 | 1.254                                                        | 0.231                          | 3166.10            | 730.40             | 0.289                          | 2279.51            | 659.51             |
| A_68_P24785198 | chr6:118088913-118088957                          | NM_030165:224           | Csgalnact2    | INSIDE                 | 1.254                                                        | 1.568                          | 548.30             | 859.72             | 1.967                          | 505.03             | 993.22             |
| A_68_P24636903 | chr6:91066915-91066959                            | NM_018815:-116          | Nup210        | PROMOTER               | 1.254                                                        | 0.441                          | 1637.37            | 722.25             | 0.553                          | 1199.83            | 663.43             |
| A_68_P24327617 | chr6:29559260-29559304                            | NM_177296:325           | Tnpo3         | INSIDE                 | 1.254                                                        | 0.104                          | 7030.42            | 730.37             | 0.130                          | 4645.09            | 605.13             |
| A_68_P24117613 | chr5:136210132-136210176                          | NM_008898:45071         | Por           | INSIDE                 | 1.254                                                        | 1.757                          | 716.32             | 1258.62            | 2.203                          | 565.62             | 1245.93            |
| A_68_P21615857 | chr2:127657373-127657417                          | NM_001113179:201        | Bub1          | INSIDE                 | 1.254                                                        | 0.359                          | 1951.60            | 701.24             | 0.451                          | 1647.10            | 742.31             |
| A_68_P21350022 | chr2:76245198-76245242                            | NM_145525:626           | Osbpl6        | INSIDE                 | 1.254                                                        | 0.237                          | 3617.14            | 858.13             | 0.298                          | 2452.75            | 729.95             |
| A_68_P30575778 | chr16:17802918-17802962                           | NM_153790:5566          | Scarf2        | INSIDE                 | 1.253                                                        | 1.777                          | 488.58             | 868.31             | 2.227                          | 434.78             | 968.39             |
| A_68_P27287691 | chr10:80607646-80607690                           | NM_010731:8653          | Zbtb7a        | INSIDE                 | 1.253                                                        | 2.358                          | 971.39             | 2290.94            | 2.956                          | 778.69             | 2301.55            |
| A_68_P27282403 | chr10:79777962-79778006                           | NM_011789:13420         | Apc2          | INSIDE                 | 1.253                                                        | 1.531                          | 615.27             | 942.13             | 1.918                          | 426.02             | 817.11             |
| A_68_P26237922 | chr8:125626652-125626696                          | NR_028128:-283          | Snord68       | PROMOTER               | 1.253                                                        | 0.445                          | 1633.12            | 727.13             | 0.558                          | 1299.15            | 724.95             |
| A_68_P26044774 | chr8:91565521-91565568                            | NM_021390:2517          | Sal1          | INSIDE                 | 1.253                                                        | 3.868                          | 268.56             | 1038.90            | 4.847                          | 225.63             | 1093.71            |
| A_68_P25089776 | chr7:52119038-52119082                            | NM_133949:6098          | Ptov1         | INSIDE                 | 1.253                                                        | 1.923                          | 3295.47            | 6336.54            | 2.410                          | 2159.92            | 5205.11            |
| A_68_P24333875 | chr6:30688293-30688337                            | NR_029900:-2984         | Mir335        | PROMOTER               | 1.253                                                        | 1.553                          | 738.35             | 1146.91            | 1.947                          | 695.03             | 1353.05            |
| A_68_P23404989 | chr4:149610705-149610749                          | NM_023119:-579          | Eno1          | PROMOTER               | 1.253                                                        | 0.200                          | 4465.83            | 894.24             | 0.251                          | 3272.18            | 821.26             |
| A_68_P21819741 | chr2:164611806-164611850                          | NM_133924:308           | Smx21         | INSIDE                 | 1.253                                                        | 1.600                          | 1447.60            | 2316.22            | 2.004                          | 1097.96            | 2200.61            |
| A_68_P31118767 | chr17:27977094-27977138                           | NM_011432:85            | Snrpc         | INSIDE                 | 1.252                                                        | 0.459                          | 2181.90            | 1001.03            | 0.574                          | 1686.04            | 968.25             |
| A_68_P26600198 | chr9:67481973-67482017                            |                         |               | Unknown                | 1.252                                                        | 1.442                          | 1007.25            | 1452.24            | 1.805                          | 775.80             | 1400.18            |
| A_68_P32562267 | chrX:98254914-98254958                            | NM_031384:42            | Tex11         | INSIDE                 | 1.251                                                        | 1.743                          | 1107.91            | 1931.57            | 2.181                          | 1396.66            | 3046.47            |
| A_68_P29696922 | chr14:70132513-70132557                           | NM_134078:-157          | Chmp7         | PROMOTER               | 1.251                                                        | 0.478                          | 1930.12            | 922.95             | 0.598                          | 1447.76            | 866.20             |
| A_68_P24059258 | chr5:124540048-124540092                          | NM_019875:5737          | Acb9          | INSIDE                 | 1.251                                                        | 1.602                          | 919.97             | 1474.25            | 2.005                          | 743.84             | 1491.70            |
| A_68_P21831539 | chr2:166539726-166539770                          | NM_177782:-416          | Prex1         | PROMOTER               | 1.251                                                        | 0.300                          | 1471.13            | 441.36             | 0.375                          | 1151.85            | 432.44             |
| A_68_P21576347 | chr2:120454717-120454761                          | NM_025475:19567         | Haus2         | DOWNSTREAM             | 1.251                                                        | 1.616                          | 2554.85            | 4127.53            | 2.021                          | 1851.53            | 3741.96            |
| A_68_P20370402 | chr1:78193529-78193573                            | NM_001159520:161        | Pax3          | INSIDE                 | 1.251                                                        | 0.363                          | 1600.37            | 581.70             | 0.455                          | 1480.80            | 673.47             |
| A_68_P32142233 | chr19:46210854-46210898                           | NM_008852:11939         | Pitx3         | INSIDE                 | 1.250                                                        | 0.181                          | 3163.74            | 571.19             | 0.226                          | 2288.60            | 516.65             |
| A_68_P28582490 | chr12:82833202-82833246                           | NM_001174107:48933      | Map3k9        | INSIDE                 | 1.250                                                        | 2.215                          | 298.11             | 660.40             | 2.769                          | 278.73             | 771.75             |
| A_68_P28431152 | chr12:52792067-52792111                           | NM_021710:136           | Ap4s1         | INSIDE                 | 1.250                                                        | 0.311                          | 2106.65            | 655.04             | 0.389                          | 1589.70            | 618.05             |
| A_68_P28059766 | chr11:98844320-98844364                           | NM_178596:-12           | Gjd3          | PROMOTER               | 1.250                                                        | 0.183                          | 2670.84            | 489.27             | 0.229                          | 2060.64            | 471.80             |
| A_68_P27431035 | chr10:107769451-107769495                         | NM_054056:228           | Pawr          | INSIDE                 | 1.250                                                        | 0.280                          | 2166.28            | 605.51             | 0.349                          | 1773.04            | 619.51             |
| A_68_P27167602 | chr10:58685294-58685338                           | NM_172939:647           | Ankrd57       | INSIDE                 | 1.250                                                        | 1.764                          | 450.25             | 794.12             | 2.204                          | 378.28             | 833.64             |
| A_68_P23896972 | chr5:93371791-93371835                            | NM_001077596:44789      | Shroom3       | INSIDE                 | 1.250                                                        | 3.628                          | 728.13             | 2641.99            | 4.534                          | 664.37             | 3012.26            |
| A_68_P20464815 | chr1:97564271-97564315                            | NM_009183:-121          | St8sia4       | PROMOTER               | 1.250                                                        | 0.166                          | 3237.05            | 536.55             | 0.207                          | 2258.99            | 468.05             |
| A_68_P30959228 | chr16:90831647-90831691                           | NM_001199210:565        | 4931408A02Rik | INSIDE                 | 1.249                                                        | 0.264                          | 1768.42            | 466.44             | 0.329                          | 1298.29            | 427.71             |
| A_68_P29592278 | chr14:49792394-49792438                           | NM_001081430:515        | Naa30         | INSIDE                 | 1.249                                                        | 6.982                          | 436.33             | 3046.52            | 8.719                          | 404.54             | 3527.40            |
| A_68_P28737547 | chr12:111517314-111517358                         | NM_172119:-103          | Dio3          | DIVERGENT_PROMOTER     | 1.249                                                        | 0.256                          | 2029.57            | 519.33             | 0.320                          | 1627.81            | 520.36             |
| A_68_P28598156 | chr12:85758502-85758546                           | NM_025525:375           | Rnf113a2      | INSIDE                 | 1.249                                                        | 0.441                          | 1662.43            | 732.66             | 0.551                          | 1267.41            | 697.76             |
| A_68_P24137625 | chr5:140267376-140267420                          | NM_010757:-91           | Mafk          | PROMOTER               | 1.249                                                        | 0.123                          | 7943.36            | 978.53             | 0.154                          | 5023.40            | 772.68             |
| A_68_P24066628 | chr5:125870372-125870416                          | NM_019639:-7            | Ube           | PROMOTER               | 1.249                                                        | 0.229                          | 2188.43            | 500.80             | 0.286                          | 1652.29            | 472.20             |
| A_68_P22350868 | chr3:96531418-96531462                            | NM_028925:-78           | Polr3c        | DIVERGENT_PROMOTER     | 1.249                                                        | 0.366                          | 1729.27            | 633.44             | 0.458                          | 1389.67            | 636.04             |
| A_68_P20616245 | chr1:133423785-133423829                          | NM_001081011:132        | Srgap2        | INSIDE                 | 1.249                                                        | 0.133                          | 10318.50           | 1368.45            | 0.166                          | 6913.37            | 1145.51            |
| A_68_P31632592 | chr18:38357632-38357676                           | NM_029357:11762         | Pcdhl         | INSIDE                 | 1.248                                                        | 2.175                          | 872.27             | 1896.91            | 2.714                          | 704.22             | 1910.91            |
| A_68_P30602963 | chr16:23431338-23431382                           | NM_001004151:2155       | Rtp1          | INSIDE                 | 1.248                                                        | 2.074                          | 295.91             | 613.69             | 2.588                          | 245.68             | 635.76             |
| A_68_P28190286 | chr11:121249176-121249220                         | NM_139147:367           | Rab40b        | INSIDE                 | 1.248                                                        | 0.337                          | 1571.31            | 530.02             | 0.421                          | 1260.17            | 530.50             |
| A_68_P27286201 | chr10:80360945-80360989                           | NM_001081688:18406      | Tmprss9       | INSIDE                 | 1.248                                                        | 0.493                          | 2079.48            | 1025.27            | 0.615                          | 1294.38            | 796.46             |
| A_68_P26216538 | chr8:122394181-122394225                          | NM_146219:7998          | Klhl36        | INSIDE                 | 1.248                                                        | 1.981                          | 400.75             | 793.99             | 2.473                          | 372.61             | 921.44             |
| A_68_P23590344 | chr5:34000777-34000821                            | NM_001040435:3          | Tacc3         | INSIDE                 | 1.248                                                        | 0.420                          | 1693.98            | 712.05             | 0.525                          | 1261.76            | 661.84             |
| A_68_P21568845 | chr2:119119812-119119856                          | NM_172269:5357          | Vps18         | INSIDE                 | 1.248                                                        | 2.098                          | 598.17             | 1254.66            | 2.618                          | 565.33             | 1479.76            |
| A_68_P21566327 | chr2:118639858-118639902                          | NM_026412:142           | D2Erd750c     | INSIDE                 | 1.248                                                        | 0.455                          | 2899.42            | 1318.79            | 0.568                          | 2005.13            | 1138.16            |
| A_68_P30379107 | chr15:81525500-81525544                           | NM_001164320:2195       | Chadl         | INSIDE                 | 1.247                                                        | 1.420                          | 2652.98            | 3766.22            | 1.770                          | 1981.59            | 3508.32            |
| A_68_P28175493 | chr11:118908126-118908170                         | NM_013926:-5921         | Cbx8          | PROMOTER               | 1.247                                                        | 2.495                          | 1353.24            | 3375.83            | 3.110                          | 1113.49            | 3463.25            |
| A_68_P27901908 | chr1:170469503-70469547                           | NM_001136062:-1190      | Eno3          | DIVERGENT_PROMOTER     | 1.247                                                        | 1.710                          | 731.54             | 1250.91            | 2.132                          | 519.27             | 1107.12            |
| A_68_P23195770 | chr4:108056055-108056099                          | NM_001099303:-122       | Fam159a       | PROMOTER               | 1.247                                                        | 0.247                          | 3844.04            | 947.97             | 0.307                          | 2877.66            | 884.85             |
| A_68_P30977036 | chr16:93683818-93683862                           | NM_173047:377           | Cbr3          | INSIDE                 | 1.246                                                        | 0.214                          | 2892.88            | 619.81             | 0.267                          | 2036.32            | 543.60             |
| A_68_P29030710 | chr13:51196400-51196444                           | NM_146043:156           | Spin1         | INSIDE                 | 1.246                                                        | 0.432                          | 1629.64            | 703.36             | 0.538                          | 1356.22            | 729.40             |
| A_68_P27571287 | chr11:6963887-6963931                             | NM_009622:417           | Adecy1        | INSIDE                 | 1.246                                                        | 0.421                          | 1158.80            | 488.01             | 0.525                          | 927.36             | 486.47             |
| A_68_P26940377 | chr10:11063537-11063581                           | NM_010146:316           | Epm2a         | INSIDE                 | 1.246                                                        | 0.407                          | 1738.65            | 708.34             | 0.507                          | 1435.06            | 728.25             |
| A_68_P26018419 | chr8:86672061-86672105                            | NM_001163752:146        | 4930432K21Rik | INSIDE                 | 1.246                                                        | 0.414                          | 2261.54            | 936.50             | 0.516                          | 1554.40            | 801.82             |
| A_68_P25100396 | chr7:53895073-53895117                            | NM_013789:83            | Sergef        | INSIDE                 | 1.246                                                        | 1.889                          | 971.47             | 1834.96            | 2.354                          | 666.59             | 1569.39            |
| A_68_P23896966 | chr5:93370979-93371023                            | NM_001077596:43977      | Shroom3       | INSIDE                 | 1.246                                                        | 3.019                          | 733.80             | 2215.28            | 3.760                          | 723.57             | 2731.57            |
| A_68_P30363896 | chr15:78858665-78858709                           | NM_008197:45            | H1f0          | INSIDE                 | 1.245                                                        | 1.381                          | 1302.59            | 1799.34            | 1.720                          | 1011.11            | 1738.76            |
| A_68_P28079343 | chr11:102261298-102261342                         | NM_016759:6572          | Rundc3a       | INSIDE                 | 1.245                                                        | 0.459                          | 1760.60            | 808.78             | 0.572                          | 1421.40            | 813.24             |
| A_68_P26998899 | chr10:22365156-22365200                           | NM_178934:362           | Sic2a12       | INSIDE                 | 1.245                                                        | 0.336                          | 3295.59            | 1106.36            | 0.418                          | 2390.66            | 999.49             |
| A_68_P24974127 | chr7:13595301-13595345                            | NM_001024699:-173       | Zbtb45        | PROMOTER               | 1.245                                                        | 0.464                          | 1835.96            | 851.16             | 0.577                          | 1301.72            | 751.44             |

| ProbeName      | Target position of probe on CpG island microarray | TargetID                | GeneSymbol    | CpG island Description | Ratio of relative methylation (TiO <sub>2</sub> -NP/Vehicle) | Sham group                     |                    |                    | TiO <sub>2</sub> -H group      |                    |                    |
|----------------|---------------------------------------------------|-------------------------|---------------|------------------------|--------------------------------------------------------------|--------------------------------|--------------------|--------------------|--------------------------------|--------------------|--------------------|
|                |                                                   |                         |               |                        |                                                              | Relative methylation (Cy5/Cy3) | Cy3 signal (Input) | Cy5 signal (MeDIP) | Relative methylation (Cy5/Cy3) | Cy3 signal (Input) | Cy5 signal (MeDIP) |
| A_68_P23538623 | chr5:23350008-23350052                            | NM_025394:-67           | Tomm7         | DIVERGENT_PROMOTER     | 1.245                                                        | 0.202                          | 4457.80            | 900.45             | 0.251                          | 2944.93            | 740.41             |
| A_68_P23260768 | chr4:122782372-122782416                          | NM_007559:-13           | Bmp8b         | PROMOTER               | 1.245                                                        | 0.458                          | 1519.47            | 695.20             | 0.570                          | 1139.26            | 648.97             |
| A_68_P21626548 | chr2:129627604-129627648                          | NR_029452:-431          | 4932416H05Rik | PROMOTER               | 1.245                                                        | 0.353                          | 2415.76            | 852.16             | 0.439                          | 1786.23            | 784.47             |
| A_68_P21013690 | chr2:12931726-12931771                            | NM_153155:743           | C1ql3         | INSIDE                 | 1.245                                                        | 0.368                          | 2652.22            | 976.06             | 0.458                          | 2070.22            | 948.61             |
| A_68_P31554066 | chr18:23468709-23468753                           | X95227:5                |               | INSIDE                 | 1.244                                                        | 0.321                          | 1440.18            | 461.93             | 0.399                          | 1092.01            | 435.80             |
| A_68_P31493068 | chr18:11055096-11055140                           | NM_010258:2611          | Gata6         | INSIDE                 | 1.244                                                        | 0.383                          | 1931.55            | 740.44             | 0.477                          | 1472.98            | 702.48             |
| A_68_P31255961 | chr17:56556971-56557015                           | NM_011218:58911         | Ptprs         | INSIDE                 | 1.244                                                        | 2.151                          | 2599.19            | 5590.02            | 2.675                          | 1767.23            | 4727.77            |
| A_68_P30514377 | chr16:5203908-5203952                             | NM_013796:175           | Nagpa         | INSIDE                 | 1.244                                                        | 0.249                          | 3313.51            | 823.89             | 0.309                          | 2460.62            | 761.38             |
| A_68_P30346600 | chr15:76010013-76010057                           | NM_201394:16106         | Plec          | INSIDE                 | 1.244                                                        | 3.979                          | 754.51             | 3002.39            | 4.949                          | 572.19             | 2831.49            |
| A_68_P29056640 | chr13:55819313-55819357                           | NM_175150:3324          | Txndc15       | INSIDE                 | 1.244                                                        | 1.766                          | 669.53             | 1182.19            | 2.196                          | 653.81             | 1435.91            |
| A_68_P26521207 | chr9:53345172-53345216                            | NM_001081152:43         | Npat          | INSIDE                 | 1.244                                                        | 1.773                          | 1575.74            | 2793.36            | 2.206                          | 1208.92            | 2666.71            |
| A_68_P25654579 | chr8:11312543-11312587                            | NM_009931:262           | Col4a1        | INSIDE                 | 1.244                                                        | 1.868                          | 1513.74            | 2827.95            | 2.324                          | 1251.60            | 2908.82            |
| A_68_P25025682 | chr7:29946707-29946751                            | NM_182927:6938          | Spred3        | INSIDE                 | 1.244                                                        | 1.563                          | 2033.33            | 3177.47            | 1.943                          | 1567.08            | 3045.39            |
| A_68_P24980758 | chr7:16895019-16895063                            | NM_133234:109           | Bbc3          | INSIDE                 | 1.244                                                        | 0.353                          | 5935.79            | 2097.38            | 0.440                          | 4029.03            | 1770.89            |
| A_68_P29629466 | chr14:58318760-58318804                           | NM_015771:46178         | Lats2         | INSIDE                 | 1.243                                                        | 2.532                          | 568.58             | 1439.49            | 3.147                          | 519.91             | 1635.90            |
| A_68_P28050942 | chr11:97361786-97361830                           | NM_021493:50335         | Arhgap23      | INSIDE                 | 1.243                                                        | 0.446                          | 2288.07            | 1020.17            | 0.554                          | 1922.63            | 1065.50            |
| A_68_P27537443 | chr10:127114329-127114373                         | NM_173732:230           | Tmem194       | INSIDE                 | 1.243                                                        | 1.907                          | 528.87             | 1008.76            | 2.371                          | 475.85             | 1128.16            |
| A_68_P26626260 | chr9:71981061-71981105                            |                         |               | Unknown                | 1.243                                                        | 2.478                          | 736.83             | 1825.85            | 3.080                          | 660.41             | 2034.03            |
| A_68_P26466561 | chr9:44061469-44061513                            | NM_001163743:14780      | Nlr1          | INSIDE                 | 1.243                                                        | 1.562                          | 728.65             | 1138.36            | 1.942                          | 614.70             | 1193.91            |
| A_68_P25804898 | chr8:41393101-41393145                            | NM_030110:-282          | Etha2         | PROMOTER               | 1.243                                                        | 2.027                          | 459.92             | 932.25             | 2.519                          | 410.18             | 1033.08            |
| A_68_P22194397 | chr3:63780079-63780123                            | NM_001033300:36         | Gmps          | INSIDE                 | 1.243                                                        | 0.291                          | 2478.12            | 721.52             | 0.362                          | 1950.35            | 705.90             |
| A_68_P29616407 | chr14:55733626-55733670                           | NM_177049:2124          | Jph4          | INSIDE                 | 1.242                                                        | 2.392                          | 6646.44            | 15901.51           | 2.971                          | 4814.51            | 14303.12           |
| A_68_P26696144 | chr9:85736977-85737021                            | NM_001164792:540        | Tpbp          | INSIDE                 | 1.242                                                        | 0.197                          | 3615.95            | 712.15             | 0.245                          | 2488.52            | 608.92             |
| A_68_P24155686 | chr5:144015791-144015835                          | NM_017467:15889         | Zfp316        | INSIDE                 | 1.242                                                        | 1.516                          | 685.73             | 1039.46            | 1.882                          | 679.29             | 1278.56            |
| A_68_P23897548 | chr5:93473182-93473226                            | NM_175270:844           | Ankrd56       | INSIDE                 | 1.242                                                        | 0.378                          | 2534.98            | 959.40             | 0.470                          | 1951.95            | 917.30             |
| A_68_P23569024 | chr5:30063021-30063065                            | NR_028426:-566          | Gm5129        | PROMOTER               | 1.242                                                        | 0.557                          | 4336.91            | 2416.40            | 0.692                          | 2993.55            | 2071.65            |
| A_68_P21569059 | chr2:119151913-119151957                          | NR_030683:-1            | Gm14207       | PROMOTER               | 1.242                                                        | 0.213                          | 2762.49            | 587.18             | 0.264                          | 1994.86            | 526.84             |
| A_68_P33007149 | chr9_random:50218-50262                           | NR_015516:-3168         | 4930526115Rik | PROMOTER               | 1.241                                                        | 1.724                          | 1246.66            | 2149.57            | 2.140                          | 1063.93            | 2276.92            |
| A_68_P32982273 | chr5:134998822-134998866                          | NM_001039162:29460      | Clip2         | INSIDE                 | 1.241                                                        | 1.880                          | 2332.51            | 4385.25            | 2.333                          | 1804.03            | 4209.28            |
| A_68_P32319275 | chrX:34138849-34138893                            | NM_016783:651           | Pgrmc1        | INSIDE                 | 1.241                                                        | 2.095                          | 505.50             | 1059.20            | 2.601                          | 769.33             | 2001.13            |
| A_68_P31786172 | chr18:66451549-66451593                           | NM_178793:-78           | Ccbe1         | PROMOTER               | 1.241                                                        | 1.446                          | 735.82             | 1063.73            | 1.794                          | 577.35             | 1035.63            |
| A_68_P31156853 | chr17:35115138-35115182                           | NM_013558:5513          | Hspa11        | INSIDE                 | 1.241                                                        | 1.992                          | 541.80             | 1079.23            | 2.473                          | 420.94             | 1040.90            |
| A_68_P29615091 | chr14:55545244-55545288                           | NM_010112:359           | Efs           | INSIDE                 | 1.241                                                        | 0.156                          | 2962.99            | 463.33             | 0.194                          | 2217.30            | 430.41             |
| A_68_P27094073 | chr10:41995265-41995309                           | NM_019740:1262          | Foxo3         | INSIDE                 | 1.241                                                        | 1.775                          | 482.69             | 856.93             | 2.204                          | 444.48             | 979.45             |
| A_68_P23996932 | chr5:113649483-113649527                          | NM_001033428:-6424      | Tmem211       | PROMOTER               | 1.241                                                        | 0.290                          | 1624.45            | 470.61             | 0.360                          | 1217.52            | 437.89             |
| A_68_P31207759 | chr17:46728766-46728810                           | NM_175168:37665         | Pik7          | INSIDE                 | 1.240                                                        | 4.137                          | 826.86             | 3421.06            | 5.129                          | 723.64             | 3711.35            |
| A_68_P31166377 | chr17:37079998-37080042                           | NM_001099632:25         | Rnf39         | INSIDE                 | 1.240                                                        | 0.197                          | 2318.65            | 456.00             | 0.244                          | 1975.57            | 481.83             |
| A_68_P26242535 | chr8:126473140-126473184                          | NM_172288:3             | Nup133        | INSIDE                 | 1.240                                                        | 3.415                          | 1466.25            | 5007.94            | 4.236                          | 1200.12            | 5083.63            |
| A_68_P25362041 | chr7:106616835-106616879                          | NM_028145:2343          | Klhl35        | INSIDE                 | 1.240                                                        | 1.957                          | 730.28             | 1428.94            | 2.426                          | 594.01             | 1437.21            |
| A_68_P23763027 | chr5:67011694-67011738                            | NM_001201413:-1660      | Apbb2         | PROMOTER               | 1.240                                                        | 0.397                          | 1535.66            | 609.99             | 0.492                          | 990.08             | 487.62             |
| A_68_P22248557 | chr3:75750620-75750664                            | NM_175193:10111         | Golm4         | INSIDE                 | 1.240                                                        | 1.883                          | 492.11             | 926.71             | 2.334                          | 532.68             | 1243.39            |
| A_68_P21839458 | chr2:167924133-167924177                          | NM_021409:17651         | Pard6b        | INSIDE                 | 1.240                                                        | 1.772                          | 1452.91            | 2575.09            | 2.198                          | 1071.13            | 2354.82            |
| A_68_P21740322 | chr2:150493841-150493885                          | NM_080575:114           | Acss1         | INSIDE                 | 1.240                                                        | 0.409                          | 1314.57            | 537.92             | 0.507                          | 1153.82            | 585.55             |
| A_68_P21350018 | chr2:76244804-76244848                            | NM_145525:232           | Osbpl6        | INSIDE                 | 1.240                                                        | 0.309                          | 1521.12            | 469.30             | 0.383                          | 1174.05            | 449.29             |
| A_68_P32817206 | chrX:165111558-165111602                          | NM_010832:254           | Ms13          | INSIDE                 | 1.239                                                        | 1.630                          | 1243.05            | 2026.16            | 2.019                          | 1572.35            | 3174.91            |
| A_68_P31493012 | chr18:11048533-11048577                           | NM_010258:-3953         | Gata6         | PROMOTER               | 1.239                                                        | 0.344                          | 1514.18            | 520.19             | 0.426                          | 1280.04            | 544.83             |
| A_68_P30511777 | chr16:4726653-4726697                             | NM_001136066:314        | Hmox2         | INSIDE                 | 1.239                                                        | 0.362                          | 3257.86            | 1180.91            | 0.449                          | 2688.73            | 1207.29            |
| A_68_P23696525 | chr5:53132855-53132899                            | NM_025951:-64           | Pi4k2b        | INSIDE                 | 1.239                                                        | 5.001                          | 1736.26            | 8682.58            | 6.196                          | 1387.02            | 8593.79            |
| A_68_P21794497 | chr2:160192823-160192867                          | NM_010658:-43           | Ma1b          | PROMOTER               | 1.239                                                        | 1.914                          | 548.00             | 1048.61            | 2.372                          | 496.01             | 1176.32            |
| A_68_P31161702 | chr17:36053831-36053875                           | NM_175934:-3            | Ppp1r10       | DIVERGENT_PROMOTER     | 1.238                                                        | 0.320                          | 3411.25            | 1090.14            | 0.396                          | 2663.04            | 1053.59            |
| A_68_P30631085 | chr16:28564344-28564388                           | NM_010199:188922        | Fgl12         | INSIDE                 | 1.238                                                        | 0.335                          | 1333.55            | 447.24             | 0.415                          | 1155.28            | 479.51             |
| A_68_P25947476 | chr8:71923403-71923447                            | NR_038043:-3981         | Gm10033       | PROMOTER               | 1.238                                                        | 0.279                          | 3552.44            | 989.69             | 0.345                          | 2650.08            | 913.67             |
| A_68_P24432386 | chr6:49345471-49345515                            | NM_029916:-110          | Stk31         | PROMOTER               | 1.238                                                        | 2.964                          | 1143.99            | 3390.62            | 3.670                          | 920.09             | 3376.90            |
| A_68_P23894275 | chr5:92864051-92864096                            | NM_183392:152           | Nup54         | INSIDE                 | 1.238                                                        | 0.121                          | 6262.74            | 756.13             | 0.150                          | 3884.67            | 580.76             |
| A_68_P21345223 | chr2:75497311-75497355                            | NR_033513:-14           | Gm6793        | PROMOTER               | 1.238                                                        | 2.896                          | 675.59             | 1956.44            | 3.584                          | 505.61             | 1811.93            |
| A_68_P21322066 | chr2:71711031-71711075                            | NM_172665:-276          | Pdk1          | PROMOTER               | 1.238                                                        | 0.230                          | 2384.96            | 547.98             | 0.284                          | 1719.16            | 489.01             |
| A_68_P32237968 | chrX:6896043-6896087                              | ENSMUST00000132126:232  |               | INSIDE                 | 1.237                                                        | 1.867                          | 554.61             | 1035.19            | 2.308                          | 619.28             | 1429.39            |
| A_68_P29130689 | chr13:72096834-72096878                           | NM_010573:4315          | Irx1          | INSIDE                 | 1.237                                                        | 0.285                          | 1608.48            | 457.79             | 0.352                          | 1160.60            | 408.48             |
| A_68_P28112961 | chr11:108286908-108286952                         | NM_029606:351           | Ccdc46        | INSIDE                 | 1.237                                                        | 0.384                          | 2064.70            | 793.77             | 0.475                          | 1436.79            | 683.09             |
| A_68_P26596761 | chr9:66897452-66897496                            | NM_001164249:-454       | Tpm1          | PROMOTER               | 1.237                                                        | 0.485                          | 1989.91            | 964.75             | 0.600                          | 1493.45            | 896.02             |
| A_68_P32260265 | chrX:11656150-11656206                            | NM_029510:1501          | Bcor          | INSIDE                 | 1.236                                                        | 1.834                          | 410.52             | 752.96             | 2.268                          | 354.63             | 804.18             |
| A_68_P32206528 | chr19:57389489-57389533                           | ENSMUST00000156316:-101 |               | PROMOTER               | 1.236                                                        | 0.432                          | 1731.95            | 747.37             | 0.533                          | 1299.72            | 693.19             |
| A_68_P29454308 | chr14:22505922-22505966                           | NM_001013826:27854      | Dupd1         | INSIDE                 | 1.236                                                        | 0.391                          | 1419.53            | 555.42             | 0.484                          | 1177.56            | 569.41             |
| A_68_P28159656 | chr11:116351010-116351061                         | NM_026364:625           | Prpsap1       | INSIDE                 | 1.236                                                        | 22.728                         | 3075.42            | 69897.39           | 28.093                         | 2269.63            | 63761.20           |
| A_68_P27504341 | chr10:121023507-121023551                         | NM_019786:322           | Tbk1          | INSIDE                 | 1.236                                                        | 1.593                          | 991.72             | 1579.79            | 1.969                          | 832.82             | 1639.73            |

| ProbeName      | Target position of probe on CpG island microarray | TargetID               | GeneSymbol    | CpG island Description | Ratio of relative methylation (TiO <sub>2</sub> -NP/Vehicle) | Sham group                     |                    |                    | TiO <sub>2</sub> -H group      |                    |                    |
|----------------|---------------------------------------------------|------------------------|---------------|------------------------|--------------------------------------------------------------|--------------------------------|--------------------|--------------------|--------------------------------|--------------------|--------------------|
|                |                                                   |                        |               |                        |                                                              | Relative methylation (Cy5/Cy3) | Cy3 signal (Input) | Cy5 signal (MeDIP) | Relative methylation (Cy5/Cy3) | Cy3 signal (Input) | Cy5 signal (MeDIP) |
| A_68_P24759667 | chr6:113419865-113419909                          | NM_001034029:10998     | Il17re        | INSIDE                 | 1.236                                                        | 3.952                          | 1345.74            | 5318.57            | 4.884                          | 1235.18            | 6032.45            |
| A_68_P22449707 | chr3:116211186-116211230                          | NM_025517:-115         | Rtcd1         | DIVERGENT_PROMOTER     | 1.236                                                        | 0.296                          | 1893.59            | 560.07             | 0.365                          | 1525.59            | 557.55             |
| A_68_P21489860 | chr2:104430467-104430511                          | NM_001037326:-152      | Cstf3         | PROMOTER               | 1.236                                                        | 0.233                          | 2792.79            | 650.42             | 0.288                          | 1953.47            | 562.11             |
| A_68_P32775564 | chrX:156064880-156064924                          | NM_001135727:-437      | Sh3kbp1       | PROMOTER               | 1.235                                                        | 1.799                          | 1837.87            | 3306.11            | 2.223                          | 2427.98            | 5396.20            |
| A_68_P27965916 | chr11:82200818-82200862                           | NM_023438:-1561        | Tmem132e      | PROMOTER               | 1.235                                                        | 0.350                          | 1404.84            | 491.60             | 0.432                          | 1125.75            | 486.32             |
| A_68_P26897424 | A_68_P26897424                                    |                        |               | Unknown                | 1.235                                                        | 1.754                          | 987.87             | 1732.45            | 2.165                          | 764.53             | 1655.50            |
| A_68_P25805594 | chr8:41509577-41509621                            | NM_178395:430          | Zdhc2         | INSIDE                 | 1.235                                                        | 0.252                          | 2192.48            | 552.67             | 0.311                          | 1738.74            | 541.11             |
| A_68_P25553143 | chr7:142729512-142729556                          | NM_011212:28           | Ptpre         | INSIDE                 | 1.235                                                        | 3.064                          | 1174.93            | 3599.72            | 3.782                          | 911.49             | 3447.47            |
| A_68_P23470208 | chr5:8912735-8912783                              | NM_008830:19038        | Abcb4         | INSIDE                 | 1.235                                                        | 2.932                          | 759.35             | 2226.36            | 3.620                          | 656.30             | 2375.48            |
| A_68_P31746195 | chr18:59334616-59334660                           | NM_001081328:-355      | Chsy3         | PROMOTER               | 1.234                                                        | 4.054                          | 831.12             | 3369.67            | 5.004                          | 722.92             | 3617.34            |
| A_68_P29071677 | chr13:58230562-58230606                           | NM_029872:-667         | Hnmpa0        | PROMOTER               | 1.234                                                        | 0.211                          | 3457.23            | 730.15             | 0.261                          | 2459.47            | 640.90             |
| A_68_P27354561 | chr10:93052055-93052099                           | NM_027246:327          | Snrpf         | INSIDE                 | 1.234                                                        | 0.367                          | 1508.73            | 553.85             | 0.453                          | 1106.79            | 501.27             |
| A_68_P24158010 | chr5:144493382-144493426                          | NM_029749:-255         | Usp4f         | PROMOTER               | 1.234                                                        | 0.420                          | 1530.57            | 642.39             | 0.518                          | 1226.33            | 635.25             |
| A_68_P23331511 | chr4:135528428-135528472                          | NM_011942:59           | Lypa2         | INSIDE                 | 1.234                                                        | 0.287                          | 2166.31            | 620.97             | 0.354                          | 1781.83            | 630.28             |
| A_68_P32022084 | chr19:24248544-24248588                           | NM_001198985:64        | Tip2          | INSIDE                 | 1.233                                                        | 1.712                          | 770.31             | 1318.72            | 2.111                          | 594.61             | 1255.15            |
| A_68_P31286847 | chr17:63230901-63230945                           | NM_010109:-256         | Efnf5         | PROMOTER               | 1.233                                                        | 0.499                          | 2342.27            | 1167.78            | 0.615                          | 1753.58            | 1077.63            |
| A_68_P29613716 | chr14:55305799-55305843                           | NM_001085473:-52       | Acin1         | PROMOTER               | 1.233                                                        | 0.239                          | 2349.03            | 560.27             | 0.294                          | 1789.81            | 526.42             |
| A_68_P23560507 | chr5:28398167-28398211                            | NM_153526:237          | Insig1        | INSIDE                 | 1.233                                                        | 0.157                          | 2971.39            | 467.22             | 0.194                          | 2133.04            | 413.54             |
| A_68_P21431331 | chr2:92755584-92755628                            | NM_030725:349          | Syt13         | INSIDE                 | 1.233                                                        | 0.332                          | 2927.36            | 971.98             | 0.410                          | 1985.95            | 813.33             |
| A_68_P20613814 | chr1:133034401-133034445                          | NM_145508:389          | Dyrk3         | INSIDE                 | 1.233                                                        | 0.253                          | 2071.56            | 524.93             | 0.312                          | 1601.32            | 500.29             |
| A_68_P31514145 | chr18:14942138-14942182                           | NM_001100449:407       | Taf4b         | INSIDE                 | 1.232                                                        | 2.687                          | 423.18             | 1137.13            | 3.310                          | 311.84             | 1032.27            |
| A_68_P30572509 | chr16:17201580-17201624                           | NM_009456:-17          | Ube2l3        | DIVERGENT_PROMOTER     | 1.232                                                        | 1.553                          | 1033.40            | 1605.37            | 1.914                          | 843.56             | 1614.40            |
| A_68_P30481999 | chr15:99556228-99556272                           | NM_183256:202          | 2310016M24Rik | INSIDE                 | 1.232                                                        | 0.285                          | 2001.52            | 570.26             | 0.351                          | 1469.79            | 516.09             |
| A_68_P29211816 | chr13:90229293-90229337                           | NM_025335:43           | Tmem167       | INSIDE                 | 1.232                                                        | 0.183                          | 2702.92            | 494.11             | 0.225                          | 2093.81            | 471.39             |
| A_68_P29095533 | chr13:63916826-63916870                           | NM_023507:207          | TM10007P08Rik | INSIDE                 | 1.232                                                        | 1.624                          | 1285.44            | 2088.02            | 2.001                          | 1087.53            | 2176.00            |
| A_68_P28101900 | chr11:106349136-106349180                         | NM_023913:-48          | Ern1          | PROMOTER               | 1.232                                                        | 0.304                          | 2331.82            | 708.17             | 0.374                          | 1869.85            | 699.78             |
| A_68_P25083585 | chr7:50932262-50932306                            | NM_145582:4884         | Ctcf          | INSIDE                 | 1.232                                                        | 2.153                          | 1020.97            | 2197.68            | 2.653                          | 767.21             | 2035.30            |
| A_68_P23541889 | chr5:23950730-23950774                            | NM_023229:301          | Fastk         | INSIDE                 | 1.232                                                        | 0.225                          | 2361.18            | 530.33             | 0.277                          | 1766.48            | 488.72             |
| A_68_P22872184 | chr4:43536297-43536341                            | NM_009416:-58          | Tpm2          | PROMOTER               | 1.232                                                        | 0.368                          | 1585.64            | 583.56             | 0.453                          | 1329.58            | 602.84             |
| A_68_P22445154 | chr3:115417852-115417896                          | NM_007901:99           | Slpr1         | INSIDE                 | 1.232                                                        | 3.284                          | 180.54             | 592.83             | 4.044                          | 149.01             | 602.60             |
| A_68_P22415391 | chr3:108742937-108742981                          | NM_025723:-43          | 4921515J06Rik | PROMOTER               | 1.232                                                        | 1.486                          | 832.62             | 1237.36            | 1.831                          | 683.79             | 1251.83            |
| A_68_P20061791 | chr1:18048589-18048633                            |                        | Unknown       |                        | 1.232                                                        | 0.322                          | 1491.39            | 480.28             | 0.397                          | 1220.35            | 484.03             |
| A_68_P32203591 | chr19:56949104-56949148                           | NM_172840:221          | Vwa2          | INSIDE                 | 1.231                                                        | 0.433                          | 1378.34            | 596.33             | 0.532                          | 1218.32            | 648.72             |
| A_68_P31256043 | chr17:56567276-56567320                           | NM_011218:48605        | Ptpns         | INSIDE                 | 1.231                                                        | 3.273                          | 3861.77            | 12638.48           | 4.029                          | 2909.55            | 11722.15           |
| A_68_P31003198 | chr17:3115122-3115166                             | NM_134123:173          | Scaf8         | INSIDE                 | 1.231                                                        | 0.313                          | 2153.85            | 674.99             | 0.386                          | 1751.24            | 675.63             |
| A_68_P30961711 | chr16:91228596-91228641                           | NM_016967:2824         | Olig2         | INSIDE                 | 1.231                                                        | 0.374                          | 2239.50            | 837.06             | 0.460                          | 1578.53            | 726.41             |
| A_68_P30931274 | chr16:85802529-85802573                           | NM_009621:810          | Adamts1       | INSIDE                 | 1.231                                                        | 0.350                          | 1431.11            | 500.77             | 0.431                          | 1104.54            | 475.89             |
| A_68_P29651206 | chr14:62266896-62266940                           | NR_028264:34292        | Dleu2         | INSIDE                 | 1.231                                                        | 0.457                          | 1724.00            | 787.11             | 0.562                          | 1410.33            | 792.67             |
| A_68_P29482227 | chr14:27354230-27354274                           | NM_032008:-1026        | Slmap         | PROMOTER               | 1.231                                                        | 0.131                          | 3310.42            | 435.01             | 0.162                          | 2421.68            | 391.80             |
| A_68_P28575260 | chr12:81440954-81440998                           | NM_177267:96612        | Deaf5         | INSIDE                 | 1.231                                                        | 1.496                          | 1250.58            | 1870.93            | 1.841                          | 903.98             | 1664.32            |
| A_68_P23295630 | chr4:128901440-128901484                          | NM_001033189:24225     | C77080        | INSIDE                 | 1.231                                                        | 1.437                          | 1342.77            | 1929.47            | 1.769                          | 1192.70            | 2109.35            |
| A_68_P32218217 | chr19:59335443-59335487                           | NM_172523:97           | Slc18a2       | INSIDE                 | 1.230                                                        | 0.338                          | 2175.18            | 735.44             | 0.416                          | 1556.44            | 647.17             |
| A_68_P31251409 | chr17:55622134-55622178                           | NM_172829:37142        | St6gal2       | INSIDE                 | 1.230                                                        | 1.453                          | 829.93             | 1206.24            | 1.787                          | 716.97             | 1281.50            |
| A_68_P31092444 | chr17:23713564-23713608                           | NM_011747:22868        | Zfp13         | INSIDE                 | 1.230                                                        | 2.272                          | 1009.72            | 2294.24            | 2.794                          | 763.06             | 2132.10            |
| A_68_P29696916 | chr14:70131894-70131938                           | NM_134078:461          | Chmp7         | INSIDE                 | 1.230                                                        | 0.520                          | 1743.11            | 906.95             | 0.640                          | 1340.05            | 857.88             |
| A_68_P29470471 | chr14:25064223-25064267                           | NM_001163513:898       | Dlg5          | INSIDE                 | 1.230                                                        | 1.787                          | 841.71             | 1504.44            | 2.198                          | 627.20             | 1378.55            |
| A_68_P26430752 | chr9:37267961-37268005                            |                        | Unknown       |                        | 1.230                                                        | 0.303                          | 2592.09            | 784.38             | 0.372                          | 2116.89            | 787.68             |
| A_68_P26233343 | chr8:124956522-124956566                          | NM_007806:296          | Cyba          | INSIDE                 | 1.230                                                        | 1.938                          | 1044.86            | 2025.28            | 2.384                          | 742.14             | 1769.22            |
| A_68_P26030504 | chr8:89148137-89148181                            | NM_025827:217          | Lomp2         | INSIDE                 | 1.230                                                        | 0.359                          | 1248.41            | 448.63             | 0.442                          | 912.30             | 403.27             |
| A_68_P24138646 | chr5:140447394-140447438                          | NM_175522:63520        | Elf1          | INSIDE                 | 1.230                                                        | 1.709                          | 2624.93            | 4487.06            | 2.103                          | 1850.57            | 3892.50            |
| A_68_P20596471 | chr1:129574483-129574527                          | NM_028135:94           | Tmem163       | INSIDE                 | 1.230                                                        | 0.380                          | 2026.97            | 769.76             | 0.467                          | 1709.00            | 798.29             |
| A_68_P30477112 | chr15:98711721-98711765                           | NM_026967:103          | Rheb1         | INSIDE                 | 1.229                                                        | 0.390                          | 1456.86            | 567.67             | 0.479                          | 1106.76            | 530.06             |
| A_68_P30425030 | chr15:89240388-89240432                           | NM_001162882:284       | 1700007E06Rik | INSIDE                 | 1.229                                                        | 2.862                          | 1193.04            | 3414.03            | 3.517                          | 907.32             | 3191.07            |
| A_68_P29248565 | chr13:97695108-97695152                           | NM_001166065:487       | Gent4         | INSIDE                 | 1.229                                                        | 0.214                          | 2226.23            | 475.60             | 0.263                          | 1896.57            | 498.04             |
| A_68_P25614230 | chr8:3496425-3496469                              | NM_080461:3309         | Zfp358        | INSIDE                 | 1.229                                                        | 1.881                          | 2609.91            | 4910.51            | 2.313                          | 2003.09            | 4633.64            |
| A_68_P20141344 | chr1:34986763-34986807                            |                        | Unknown       |                        | 1.229                                                        | 1.684                          | 705.09             | 1187.12            | 2.069                          | 588.79             | 1218.31            |
| A_68_P31465563 | chr18:4920525-4920569                             | ENSMUST00000131210:-18 |               | PROMOTER               | 1.228                                                        | 1.578                          | 578.78             | 913.19             | 1.937                          | 481.31             | 932.25             |
| A_68_P30370815 | chr15:80042691-80042735                           | NM_010795:38562        | Mgat3         | INSIDE                 | 1.228                                                        | 2.272                          | 437.21             | 993.29             | 2.789                          | 334.32             | 932.32             |
| A_68_P27933360 | chr11:76479988-76480032                           | NM_177182:-5961        | Bhlha9        | PROMOTER               | 1.228                                                        | 3.293                          | 552.02             | 1817.58            | 4.043                          | 561.86             | 2271.49            |
| A_68_P24946862 | chr7:3645247-3645291                              | NM_024168:-841         | Tsen34        | PROMOTER               | 1.228                                                        | 0.369                          | 4149.34            | 1533.12            | 0.454                          | 2679.76            | 1215.50            |
| A_68_P23917033 | chr5:98683430-98683474                            | NM_010203:250          | Fgf5          | INSIDE                 | 1.228                                                        | 0.353                          | 1647.77            | 582.29             | 0.434                          | 1322.58            | 574.16             |
| A_68_P20935795 | chr1:192849358-192849402                          | NR_027928:151          | A230020J21Rik | INSIDE                 | 1.228                                                        | 0.323                          | 1731.26            | 558.98             | 0.396                          | 1431.26            | 567.38             |
| A_68_P20734232 | chr1:156646813-156646857                          | AK046991:-6961         |               | PROMOTER               | 1.228                                                        | 3.469                          | 587.31             | 2037.19            | 4.258                          | 429.14             | 1827.18            |
| A_68_P20241448 | chr1:55419388-55419432                            | NM_001113367:141       | Boll          | INSIDE                 | 1.228                                                        | 1.444                          | 730.01             | 1054.03            | 1.774                          | 627.26             | 1112.49            |
| A_68_P32241968 | chrX:7722430-7722474                              | NR_033561:-100         | 2900002K06Rik | PROMOTER               | 1.227                                                        | 0.376                          | 1221.03            | 458.81             | 0.461                          | 1768.06            | 815.40             |

| ProbeName      | Target position of probe on CpG island microarray | TargetID               | GeneSymbol    | CpG island Description | Ratio of relative methylation (TiO <sub>2</sub> -NP/Vehicle) | Sham group                     |                    |                    | TiO <sub>2</sub> -H group      |                    |                    |
|----------------|---------------------------------------------------|------------------------|---------------|------------------------|--------------------------------------------------------------|--------------------------------|--------------------|--------------------|--------------------------------|--------------------|--------------------|
|                |                                                   |                        |               |                        |                                                              | Relative methylation (Cy5/Cy3) | Cy3 signal (Input) | Cy5 signal (MeDIP) | Relative methylation (Cy5/Cy3) | Cy3 signal (Input) | Cy5 signal (MeDIP) |
| A_68_P31117096 | chr17:27692021-27692065                           | NM_001025427:-1476     | Hmgal1        | PROMOTER               | 1.227                                                        | 0.452                          | 1287.58            | 582.47             | 0.555                          | 1032.69            | 573.11             |
| A_68_P30594367 | chr16:21794433-21794477                           | NR_037957:35           | 1300002E11Rik | INSIDE                 | 1.227                                                        | 0.510                          | 2204.70            | 1124.79            | 0.626                          | 1756.80            | 1099.43            |
| A_68_P29660083 | chr14:63864272-63864316                           | NM_008092:-197         | Gata4         | PROMOTER               | 1.227                                                        | 0.194                          | 3999.87            | 775.34             | 0.238                          | 2698.72            | 641.81             |
| A_68_P28157765 | chr11:116029229-116029273                         | NM_172571:-242         | Fbfl1         | INSIDE                 | 1.227                                                        | 0.282                          | 2790.15            | 785.78             | 0.346                          | 2021.09            | 698.61             |
| A_68_P26812954 | chr9:107996445-107996489                          | NM_146226:345          | Apeh          | INSIDE                 | 1.227                                                        | 0.264                          | 3402.94            | 899.10             | 0.324                          | 2327.18            | 754.28             |
| A_68_P25958569 | chr8:74249306-74249350                            | NM_028715:252          | Fcho1         | INSIDE                 | 1.227                                                        | 0.281                          | 2065.09            | 581.14             | 0.345                          | 1646.34            | 568.28             |
| A_68_P24735708 | chr6:108732909-108732953                          | NM_026011:-122         | Arl8b         | PROMOTER               | 1.227                                                        | 0.482                          | 2919.63            | 1407.48            | 0.592                          | 2224.36            | 1315.81            |
| A_68_P23335797 | chr4:136327232-136327276                          | NM_010142:64596        | Ephb2         | INSIDE                 | 1.227                                                        | 1.729                          | 1005.33            | 1738.47            | 2.123                          | 778.69             | 1652.82            |
| A_68_P22314992 | chr3:88447835-88447879                            | NM_001198912:-22541    | Arhge12       | INSIDE                 | 1.227                                                        | 1.747                          | 575.74             | 1005.68            | 2.143                          | 502.19             | 1076.23            |
| A_68_P31202057 | chr17:45732420-45732464                           | NM_001199113:-1853     | Slc29a1       | PROMOTER               | 1.226                                                        | 0.546                          | 2637.90            | 1441.45            | 0.670                          | 1789.07            | 1198.50            |
| A_68_P30508954 | chr16:4213021-4213065                             | NM_001025432:362       | Crebbp        | INSIDE                 | 1.226                                                        | 0.282                          | 2936.26            | 827.16             | 0.345                          | 2092.22            | 722.39             |
| A_68_P30382912 | chr15:82176300-82176344                           | NM_026914:-153         | 1500032L24Rik | PROMOTER               | 1.226                                                        | 1.914                          | 522.40             | 1000.07            | 2.347                          | 457.94             | 1074.93            |
| A_68_P28600137 | chr12:86113873-86113917                           | NM_023409:168          | Npc2          | INSIDE                 | 1.226                                                        | 0.140                          | 4197.99            | 587.68             | 0.172                          | 3161.57            | 542.63             |
| A_68_P27222454 | chr10:68676238-68676282                           | NM_001081347:856       | Rhobtb1       | INSIDE                 | 1.226                                                        | 1.445                          | 1133.60            | 1638.28            | 1.772                          | 891.81             | 1580.72            |
| A_68_P25094126 | chr7:52883769-52883813                            | NM_028544:884          | Rasip1        | INSIDE                 | 1.226                                                        | 1.675                          | 598.51             | 1002.55            | 2.053                          | 507.39             | 1041.83            |
| A_68_P20864291 | chr1:180458344-180458388                          | NM_001161665:-889      | Kif26b        | PROMOTER               | 1.226                                                        | 0.195                          | 3883.83            | 758.30             | 0.239                          | 2956.41            | 707.82             |
| A_68_P31304162 | chr17:66425686-66425730                           | NM_001025572:678       | Ankrd12       | INSIDE                 | 1.225                                                        | 0.260                          | 2814.48            | 732.18             | 0.319                          | 2090.64            | 666.37             |
| A_68_P27226082 | chr10:69284986-69285030                           | NM_146005:28853        | Ank3          | INSIDE                 | 1.225                                                        | 1.724                          | 693.24             | 1195.38            | 2.112                          | 573.15             | 1210.39            |
| A_68_P27172914 | chr10:59648890-59648934                           | NM_016803:33096        | Chst3         | INSIDE                 | 1.225                                                        | 2.696                          | 324.98             | 876.11             | 3.303                          | 308.20             | 1018.03            |
| A_68_P26132671 | chr8:107800458-107800502                          | NM_030152:134          | No13          | INSIDE                 | 1.225                                                        | 1.462                          | 4668.59            | 6826.82            | 1.791                          | 3389.41            | 6069.38            |
| A_68_P24142833 | chr5:141180856-141180900                          | NM_172724:-98          | Baat1         | DIVERGENT_PROMOTER     | 1.225                                                        | 0.443                          | 1911.22            | 845.95             | 0.542                          | 1462.64            | 793.28             |
| A_68_P21570454 | chr2:119420252-119420296                          | NR_015473:243          | 1700020I14Rik | INSIDE                 | 1.225                                                        | 0.385                          | 2359.35            | 908.59             | 0.472                          | 1948.31            | 918.88             |
| A_68_P31201771 | chr17:45692645-45692689                           | NM_008690:2            | Nfkbi         | INSIDE                 | 1.224                                                        | 0.259                          | 2349.08            | 607.60             | 0.317                          | 1651.29            | 522.73             |
| A_68_P30542067 | chr16:10395304-10395348                           | NM_001099275:215       | Tekt5         | INSIDE                 | 1.224                                                        | 0.472                          | 2067.83            | 976.87             | 0.578                          | 1595.28            | 922.57             |
| A_68_P24874649 | chr6:136776165-136776209                          | NM_021714:551          | Wbp11         | INSIDE                 | 1.224                                                        | 1.637                          | 1360.15            | 2226.67            | 2.004                          | 1054.90            | 2113.88            |
| A_68_P23978152 | chr5:110605959-110606003                          | NM_008146:261          | Golga3        | INSIDE                 | 1.224                                                        | 0.190                          | 3991.32            | 759.83             | 0.233                          | 2912.96            | 678.71             |
| A_68_P22210465 | chr3:67319575-67319619                            | NM_001164763:-151      | Rarres1       | PROMOTER               | 1.224                                                        | 0.336                          | 1405.35            | 471.94             | 0.411                          | 1173.71            | 482.40             |
| A_68_P28675866 | chr12:100630793-100630837                         | NM_183186:57470        | Foxn3         | INSIDE                 | 1.223                                                        | 0.413                          | 1577.77            | 651.89             | 0.505                          | 1279.43            | 646.38             |
| A_68_P28456271 | chr12:57446391-57446435                           | NM_145442:469          | Mbip          | INSIDE                 | 1.223                                                        | 0.492                          | 1634.61            | 804.85             | 0.602                          | 1198.77            | 721.95             |
| A_68_P25956521 | chr8:73891201-73891245                            | NM_025917:107          | Use1          | INSIDE                 | 1.223                                                        | 0.308                          | 1637.65            | 504.83             | 0.377                          | 1259.92            | 475.00             |
| A_68_P24465594 | chr6:54766604-54766648                            | NM_199143:-283         | Znr12         | PROMOTER               | 1.223                                                        | 0.305                          | 2000.18            | 610.82             | 0.374                          | 1588.66            | 593.46             |
| A_68_P24052416 | chr5:123271272-123271316                          | NM_001042491:54        | Anapc5        | INSIDE                 | 1.223                                                        | 0.339                          | 1324.47            | 448.39             | 0.414                          | 1164.88            | 482.12             |
| A_68_P23365307 | chr4:141220027-141220071                          | NM_001033150:-18       | Plekchm2      | PROMOTER               | 1.223                                                        | 1.782                          | 541.05             | 964.05             | 2.180                          | 433.37             | 944.62             |
| A_68_P23303540 | chr4:130506009-130506056                          | NM_010769:5733         | Matn1         | INSIDE                 | 1.223                                                        | 1.880                          | 581.15             | 1092.80            | 2.301                          | 618.76             | 1423.54            |
| A_68_P31104079 | chr17:25611509-25611553                           | NM_027951:2996         | Tekt4         | INSIDE                 | 1.222                                                        | 0.204                          | 2493.07            | 508.94             | 0.249                          | 1648.56            | 411.28             |
| A_68_P29734164 | chr14:76904319-76904363                           | NM_009366:24           | Tsc22d1       | INSIDE                 | 1.222                                                        | 1.887                          | 696.18             | 1313.53            | 2.306                          | 499.26             | 1151.17            |
| A_68_P28818473 | chr13:9762982-9763026                             | NM_001199141:1556      | Zmynd11       | INSIDE                 | 1.222                                                        | 0.124                          | 5025.46            | 624.53             | 0.152                          | 3432.42            | 521.24             |
| A_68_P26845368 | chr9:114471438-114471482                          | NM_001042503:2027      | Trim71        | INSIDE                 | 1.222                                                        | 1.730                          | 691.69             | 1196.34            | 2.114                          | 492.23             | 1040.46            |
| A_68_P26824826 | chr9:110532797-110532841                          | NM_183276:23847        | Nbeal2        | INSIDE                 | 1.222                                                        | 1.689                          | 2354.63            | 3977.11            | 2.065                          | 1639.02            | 3384.18            |
| A_68_P26822034 | chr9:110020069-110020113                          | NM_133347:-2004        | Dlx30         | PROMOTER               | 1.222                                                        | 2.276                          | 710.13             | 1616.59            | 2.781                          | 560.85             | 1559.67            |
| A_68_P26402553 | chr9:31721424-31721468                            | NM_013800:-576         | Barx2         | PROMOTER               | 1.222                                                        | 0.285                          | 2676.04            | 763.89             | 0.349                          | 2142.30            | 747.50             |
| A_68_P25956547 | chr8:73895356-73895400                            | NM_029865:182          | Ocel1         | INSIDE                 | 1.222                                                        | 0.423                          | 1353.06            | 572.97             | 0.517                          | 1080.09            | 558.81             |
| A_68_P25952417 | chr8:73047003-73047047                            | NM_029366:55           | 2810422J05Rik | INSIDE                 | 1.222                                                        | 2.155                          | 1198.81            | 2582.97            | 2.632                          | 935.61             | 2462.81            |
| A_68_P25708988 | chr8:23170683-23170727                            | NM_007511:-158         | Atp7b         | DIVERGENT_PROMOTER     | 1.222                                                        | 0.461                          | 1210.19            | 558.24             | 0.564                          | 1046.96            | 590.24             |
| A_68_P24325043 | chr6:29129618-29129662                            | NM_001101443:-56       | Prrt4         | PROMOTER               | 1.222                                                        | 6.341                          | 7959.01            | 50471.28           | 7.748                          | 4929.96            | 38198.39           |
| A_68_P22291215 | chr3:84284164-84284208                            | NM_001205355:-773      | Fhdcl         | PROMOTER               | 1.222                                                        | 0.204                          | 3644.28            | 743.10             | 0.249                          | 2527.87            | 629.91             |
| A_68_P20141348 | chr1:34987329-34987373                            |                        | Unknown       |                        | 1.222                                                        | 1.482                          | 1462.77            | 2167.50            | 1.811                          | 1302.42            | 2358.27            |
| A_68_P32410977 | chrX:56820526-56820570                            | ENSMUST00000124402:101 |               | INSIDE                 | 1.221                                                        | 4.446                          | 640.91             | 2849.80            | 5.429                          | 594.78             | 3229.29            |
| A_68_P32289636 | chrX:20265804-20265848                            | NM_011049:208          | Cdk16         | INSIDE                 | 1.221                                                        | 3.018                          | 347.64             | 1049.17            | 3.686                          | 410.26             | 1512.27            |
| A_68_P32119983 | chr19:42330356-42330400                           | NM_027694:150          | Golga7b       | INSIDE                 | 1.221                                                        | 0.312                          | 2003.28            | 624.36             | 0.380                          | 1516.08            | 576.76             |
| A_68_P29616399 | chr14:55732726-55732770                           | NM_177049:3024         | Jph4          | INSIDE                 | 1.221                                                        | 2.167                          | 1011.37            | 2191.68            | 2.645                          | 777.31             | 2056.14            |
| A_68_P29152753 | chr13:76194078-76194122                           | NM_175495:344          | Gpr150        | INSIDE                 | 1.221                                                        | 1.733                          | 576.50             | 999.09             | 2.115                          | 465.63             | 984.92             |
| A_68_P28164528 | chr11:117193656-117193700                         | NM_001113488:52        | Septin9       | INSIDE                 | 1.221                                                        | 0.260                          | 1870.58            | 487.11             | 0.318                          | 1293.19            | 411.33             |
| A_68_P27143268 | chr10:53349438-53349484                           | NM_027830:785          | Mcm9          | INSIDE                 | 1.221                                                        | 2.063                          | 328.30             | 677.42             | 2.520                          | 284.18             | 716.10             |
| A_68_P25953468 | chr8:73223214-73223258                            | NM_010592:1599         | Jund          | INSIDE                 | 1.221                                                        | 0.432                          | 1171.90            | 506.84             | 0.528                          | 925.21             | 488.67             |
| A_68_P25574803 | chr7:146101482-146101526                          | NM_009760:315          | Nbnp3         | PROMOTER               | 1.221                                                        | 0.175                          | 7737.19            | 1357.01            | 0.214                          | 5359.51            | 1147.85            |
| A_68_P25394039 | chr7:112885744-112885788                          | NM_133951:133          | Rp8           | INSIDE                 | 1.221                                                        | 0.336                          | 1786.55            | 599.51             | 0.410                          | 1376.64            | 563.86             |
| A_68_P25094417 | chr7:52934632-52934676                            | NM_019934:274          | Sec1          | INSIDE                 | 1.221                                                        | 2.041                          | 1128.99            | 2303.94            | 2.491                          | 810.20             | 2018.09            |
| A_68_P31258633 | chr17:56969523-56969567                           | NM_009056:887          | Rfk2          | INSIDE                 | 1.220                                                        | 0.522                          | 2502.82            | 1306.73            | 0.637                          | 1636.33            | 1042.31            |
| A_68_P30094472 | chr15:27703695-27703739                           | NM_001081302:-251887   | Trio          | INSIDE                 | 1.220                                                        | 2.379                          | 1438.49            | 3422.40            | 2.904                          | 1191.15            | 3458.71            |
| A_68_P27995152 | chr11:87431026-87431070                           | NM_001045527:383       | Hsf5          | INSIDE                 | 1.220                                                        | 2.987                          | 1008.07            | 3011.45            | 3.646                          | 802.93             | 2927.31            |
| A_68_P22359703 | chr3:98143412-98143460                            | NM_016966:456          | Phgdh         | INSIDE                 | 1.220                                                        | 0.267                          | 1767.58            | 472.53             | 0.326                          | 1285.11            | 419.12             |
| A_68_P21116281 | chr2:32449587-32449631                            | NM_001025311:-5620     | St6galnac6    | PROMOTER               | 1.220                                                        | 1.774                          | 981.64             | 1741.01            | 2.164                          | 754.19             | 1632.41            |
| A_68_P20149049 | chr1:36614326-36614370                            | NM_001126047:878       | Sema4c        | INSIDE                 | 1.220                                                        | 9.408                          | 5550.05            | 52216.09           | 11.478                         | 4207.05            | 48287.19           |
| A_68_P30595258 | chr16:21947391-21947395                           | NM_025693:253          | Tmem41a       | INSIDE                 | 1.219                                                        | 0.212                          | 5133.85            | 1087.85            | 0.258                          | 3778.43            | 976.19             |

| ProbeName      | Target position of probe on CpG island microarray | TargetID                | GeneSymbol    | CpG island Description | Ratio of relative methylation (TiO <sub>2</sub> -NP/Vehicle) | Sham group                     |                    |                    | TiO <sub>2</sub> -H group      |                    |                    |
|----------------|---------------------------------------------------|-------------------------|---------------|------------------------|--------------------------------------------------------------|--------------------------------|--------------------|--------------------|--------------------------------|--------------------|--------------------|
|                |                                                   |                         |               |                        |                                                              | Relative methylation (Cy5/Cy3) | Cy3 signal (Input) | Cy5 signal (MeDIP) | Relative methylation (Cy5/Cy3) | Cy3 signal (Input) | Cy5 signal (MeDIP) |
| A_68_P29249638 | chr13:97907886-97907931                           | NM_177266:17            | Gfm2          | INSIDE                 | 1.219                                                        | 7.255                          | 428.52             | 3108.84            | 8.843                          | 362.41             | 3204.74            |
| A_68_P28071220 | chr11:100831835-100831879                         | NM_008986:75            | Ptrf          | INSIDE                 | 1.219                                                        | 0.498                          | 2611.15            | 1300.73            | 0.607                          | 1990.09            | 1208.48            |
| A_68_P27880661 | chr11:66866069-66866113                           | NM_025510:30            | 2310004I24Rik | INSIDE                 | 1.219                                                        | 0.221                          | 2345.30            | 517.47             | 0.269                          | 1580.43            | 425.21             |
| A_68_P26643862 | chr9:75257222-75257266                            | NM_027418:-78           | Mapk6         | PROMOTER               | 1.219                                                        | 1.940                          | 1056.41            | 2049.55            | 2.365                          | 873.47             | 2065.70            |
| A_68_P26014849 | chr8:85913580-85913624                            | NM_009904:-187          | Ctgn          | PROMOTER               | 1.219                                                        | 0.395                          | 1376.75            | 543.28             | 0.481                          | 1173.40            | 564.67             |
| A_68_P22311003 | chr3:87775500-87775544                            | NM_016701:508           | Nes           | INSIDE                 | 1.219                                                        | 0.531                          | 1653.72            | 878.44             | 0.648                          | 1387.87            | 898.87             |
| A_68_P20641451 | chr1:137662928-137662972                          | NM_013750:289           | Phlda3        | INSIDE                 | 1.219                                                        | 1.816                          | 840.37             | 1526.18            | 2.212                          | 751.79             | 1663.31            |
| A_68_P30575506 | chr16:17759553-17759597                           | NM_145479:-139          | Klhl22        | PROMOTER               | 1.218                                                        | 0.296                          | 1608.55            | 476.78             | 0.361                          | 1423.97            | 514.08             |
| A_68_P28529995 | chr12:73171043-73171090                           | NM_181752:912           | Gpr135        | INSIDE                 | 1.218                                                        | 3.065                          | 738.98             | 2264.87            | 3.734                          | 594.81             | 2220.74            |
| A_68_P25962580 | chr8:75247857-75247901                            | NM_001113248:692        | Sin3b         | INSIDE                 | 1.218                                                        | 0.512                          | 1865.97            | 954.52             | 0.623                          | 1487.24            | 926.69             |
| A_68_P21814245 | chr2:163575768-163575812                          | NM_007398:123           | Ada           | INSIDE                 | 1.218                                                        | 0.207                          | 2150.90            | 446.10             | 0.253                          | 1540.54            | 389.02             |
| A_68_P21269076 | chr2:62249843-62249887                            | NM_010074:424           | Dpp4          | INSIDE                 | 1.218                                                        | 2.014                          | 521.37             | 1049.95            | 2.452                          | 439.76             | 1078.46            |
| A_68_P31863473 | chr18:80492422-80492466                           | NM_001190373:68549      | Kcng2         | INSIDE                 | 1.217                                                        | 2.319                          | 676.58             | 1568.75            | 2.823                          | 1656.03            | 1656.03            |
| A_68_P30018898 | chr15:11835366-11835410                           | NM_001039181:41         | Npr3          | INSIDE                 | 1.217                                                        | 0.434                          | 3161.08            | 1370.76            | 0.528                          | 2311.15            | 1219.44            |
| A_68_P25608862 | chr7:151924611-151924655                          | NM_178642:-249          | Ano1          | PROMOTER               | 1.217                                                        | 0.518                          | 1540.13            | 797.98             | 0.631                          | 1273.33            | 803.16             |
| A_68_P25082496 | chr7:50720344-50720388                            | NM_026695:20854         | Etfb          | DOWNSTREAM             | 1.217                                                        | 0.252                          | 3641.91            | 918.21             | 0.307                          | 2723.97            | 835.63             |
| A_68_P24093837 | chr5:130925156-130925200                          | NM_021371:517           | Caln1         | INSIDE                 | 1.217                                                        | 1.517                          | 1392.32            | 2111.54            | 1.846                          | 1204.23            | 2223.39            |
| A_68_P28731497 | chr12:110271448-110271492                         | NM_001163175:34957      | Begain        | INSIDE                 | 1.216                                                        | 1.443                          | 919.34             | 1326.66            | 1.755                          | 803.95             | 1411.12            |
| A_68_P26081252 | chr8:97605501-97605545                            | NM_028805:422           | Katnb1        | INSIDE                 | 1.216                                                        | 1.476                          | 996.14             | 1470.66            | 1.796                          | 729.42             | 1309.84            |
| A_68_P25263202 | chr7:86937639-86937683                            | NM_008588:816           | Mesp1         | INSIDE                 | 1.216                                                        | 1.757                          | 970.33             | 1704.78            | 2.137                          | 802.37             | 1714.67            |
| A_68_P23281732 | chr4:126413411-126413455                          | NM_198960:81            | Tcfap2e       | INSIDE                 | 1.216                                                        | 0.302                          | 2761.25            | 833.26             | 0.367                          | 1819.61            | 667.74             |
| A_68_P22037671 | chr3:32264236-32264280                            | NR_027966:-152          | 4930429B21Rik | PROMOTER               | 1.216                                                        | 0.407                          | 1637.90            | 666.24             | 0.495                          | 1506.25            | 744.96             |
| A_68_P32408597 | chrX:56387379-56387423                            | NM_010200:213           | Fgf13         | INSIDE                 | 1.215                                                        | 2.150                          | 218.90             | 470.66             | 2.613                          | 304.91             | 796.78             |
| A_68_P30939274 | chr16:87354456-87354500                           | NM_001159331:49         | N6amt1        | INSIDE                 | 1.215                                                        | 2.217                          | 643.66             | 1426.86            | 2.693                          | 551.34             | 1484.57            |
| A_68_P29612545 | chr14:55082897-55082941                           | NM_022993:-65           | Lrp10         | PROMOTER               | 1.215                                                        | 0.222                          | 2277.03            | 505.36             | 0.270                          | 1701.85            | 458.84             |
| A_68_P28748382 | chr12:113412288-113412332                         | NM_001097621:27892      | Kif26a        | INSIDE                 | 1.215                                                        | 2.017                          | 688.83             | 1389.19            | 2.449                          | 585.53             | 1434.25            |
| A_68_P28181190 | chr11:119803788-119803832                         | NM_001037754:-595       | Baiaap2       | PROMOTER               | 1.215                                                        | 0.226                          | 3474.27            | 784.86             | 0.275                          | 2646.36            | 726.44             |
| A_68_P28149048 | chr11:114530351-114530395                         | NM_001048058:278        | Rpl38         | INSIDE                 | 1.215                                                        | 0.316                          | 1567.45            | 495.97             | 0.384                          | 1247.40            | 479.60             |
| A_68_P27897481 | chr1:69659900-69659944                            | NM_023564:-196          | Plscr3        | PROMOTER               | 1.215                                                        | 0.305                          | 2931.77            | 894.45             | 0.371                          | 2177.49            | 807.11             |
| A_68_P25486801 | chr7:131127425-131127469                          | ENSMUST00000106437:1064 |               | INSIDE                 | 1.215                                                        | 0.318                          | 1581.46            | 502.70             | 0.386                          | 1230.64            | 475.21             |
| A_68_P23600259 | chr5:35739868-35739912                            | NM_010445:8125          | Hmx1          | DOWNSTREAM             | 1.215                                                        | 0.423                          | 2176.94            | 920.59             | 0.514                          | 1680.77            | 863.52             |
| A_68_P23320286 | chr4:133523495-133523539                          | NM_016957:390           | Hmgn2         | INSIDE                 | 1.215                                                        | 0.191                          | 3344.10            | 637.34             | 0.232                          | 2363.78            | 547.39             |
| A_68_P29531975 | chr14:35636100-35636144                           | NM_008166:2801          | Grid1         | INSIDE                 | 1.214                                                        | 0.364                          | 1707.15            | 621.27             | 0.442                          | 1199.16            | 529.74             |
| A_68_P26713770 | chr9:89599836-89599880                            | NM_025360:23            | Tmed3         | INSIDE                 | 1.214                                                        | 0.386                          | 2039.77            | 788.19             | 0.469                          | 1648.45            | 773.22             |
| A_68_P23804519 | chr5:75016038-75016082                            | NM_001159578:57837      | Lnx1          | INSIDE                 | 1.214                                                        | 1.554                          | 690.64             | 1073.03            | 1.887                          | 497.35             | 938.26             |
| A_68_P23752944 | chr5:65194780-65194824                            | NM_008453:41            | Klf3          | INSIDE                 | 1.214                                                        | 0.533                          | 2168.14            | 1155.01            | 0.647                          | 1661.66            | 1074.97            |
| A_68_P22069323 | chr3:38354784-38354828                            | NM_001167883:28932      | Ankrd50       | INSIDE                 | 1.214                                                        | 1.415                          | 836.46             | 1183.62            | 1.718                          | 686.67             | 1180.04            |
| A_68_P28033246 | chr11:94347284-94347328                           | NM_144827:-682          | Spta20        | PROMOTER               | 1.213                                                        | 0.429                          | 1094.03            | 469.58             | 0.520                          | 884.81             | 460.52             |
| A_68_P26811066 | chr9:107673364-107673408                          | NM_148930:-53           | Rbm5          | PROMOTER               | 1.213                                                        | 0.375                          | 2534.94            | 951.68             | 0.455                          | 1806.99            | 823.04             |
| A_68_P31162851 | chr17:36304426-36304470                           | NM_001081032:1034       | Gm8909        | INSIDE                 | 1.212                                                        | 0.263                          | 2732.01            | 717.32             | 0.318                          | 1974.55            | 628.55             |
| A_68_P29620446 | chr14:56503972-56504016                           | NM_027143:189           | Khny1         | INSIDE                 | 1.212                                                        | 0.201                          | 3182.28            | 639.04             | 0.243                          | 2361.03            | 623.11             |
| A_68_P28054171 | chr11:97914188-97914232                           | NM_146028:566           | Stac2         | INSIDE                 | 1.212                                                        | 0.412                          | 1827.52            | 753.76             | 0.500                          | 1366.91            | 683.41             |
| A_68_P25089581 | chr7:52094932-52094976                            | NM_010215:3297          | Il4i1         | INSIDE                 | 1.212                                                        | 3.248                          | 2344.90            | 7616.81            | 3.936                          | 1923.09            | 7568.65            |
| A_68_P24602909 | chr6:85026381-85026425                            | NR_002702:268           | Npm3-ps1      | INSIDE                 | 1.212                                                        | 1.416                          | 1307.30            | 1850.96            | 1.716                          | 1050.03            | 1801.77            |
| A_68_P22481535 | chr3:121977658-121977702                          | NM_153806:349           | Dnrtip2       | INSIDE                 | 1.212                                                        | 0.434                          | 2595.32            | 1126.84            | 0.526                          | 1874.35            | 986.69             |
| A_68_P21933400 | chr3:8664630-8664674                              | NM_010423:2386          | Hey1          | INSIDE                 | 1.212                                                        | 0.371                          | 2105.80            | 781.37             | 0.450                          | 1675.46            | 753.70             |
| A_68_P21646218 | chr2:1333378320-133378364                         | NM_007553:-592          | Bmp2          | PROMOTER               | 1.212                                                        | 0.422                          | 2139.81            | 901.98             | 0.511                          | 1659.65            | 848.21             |
| A_68_P20157010 | chr1:38053691-38053737                            | NM_172054:339           | Txndc9        | INSIDE                 | 1.212                                                        | 2.310                          | 324.13             | 748.58             | 2.799                          | 283.38             | 793.33             |
| A_68_P31933116 | chr19:6184605-6184649                             | NM_001165919:217        | 1700123I01Rik | INSIDE                 | 1.211                                                        | 2.315                          | 397.59             | 920.22             | 2.803                          | 364.23             | 1020.76            |
| A_68_P31757541 | chr18:61560019-61560063                           | NM_133249:45            | Ppargc1b      | INSIDE                 | 1.211                                                        | 2.510                          | 297.96             | 747.90             | 3.039                          | 298.43             | 906.89             |
| A_68_P31631086 | chr18:38114645-38114689                           | NM_010411:-24           | Hdac3         | DIVERGENT_PROMOTER     | 1.211                                                        | 0.206                          | 2248.85            | 464.31             | 0.250                          | 1718.36            | 429.55             |
| A_68_P31112725 | chr17:26978307-26978351                           | NM_008700:182           | Nkx2-5        | INSIDE                 | 1.211                                                        | 0.257                          | 1819.82            | 468.26             | 0.312                          | 1352.32            | 421.39             |
| A_68_P30397307 | chr15:84686477-84686521                           | NM_001081166:61         | Phf21b        | INSIDE                 | 1.211                                                        | 3.050                          | 475.45             | 1449.91            | 3.694                          | 422.82             | 1561.76            |
| A_68_P28058440 | chr11:98635015-98635059                           | NM_145434:1520          | Nr1d1         | INSIDE                 | 1.211                                                        | 1.841                          | 386.64             | 711.78             | 2.230                          | 327.60             | 730.41             |
| A_68_P26887820 | chr9:122075655-122075699                          | NM_001164572:49293      | Snrk          | INSIDE                 | 1.211                                                        | 1.692                          | 2234.85            | 3781.60            | 2.049                          | 1613.67            | 3306.42            |
| A_68_P25574930 | chr7:146132695-146132739                          | NM_028708:284           | Jaknlp3       | INSIDE                 | 1.211                                                        | 0.187                          | 6719.69            | 1254.53            | 0.226                          | 4236.82            | 957.54             |
| A_68_P23439845 | chr4:155027518-155027562                          | NM_011985:-47           | Mmp23         | PROMOTER               | 1.211                                                        | 0.466                          | 1399.98            | 652.78             | 0.565                          | 1001.00            | 565.18             |
| A_68_P28727350 | chr12:109566414-109566458                         | NM_001044380:21957      | Hhip11        | INSIDE                 | 1.210                                                        | 0.458                          | 1188.84            | 544.19             | 0.554                          | 953.79             | 528.19             |
| A_68_P28187705 | chr11:120810221-120810265                         | NM_001038653:-138       | Slc16a3       | PROMOTER               | 1.210                                                        | 0.449                          | 1245.90            | 559.87             | 0.544                          | 1022.40            | 555.90             |
| A_68_P26158627 | chr8:112248255-112248299                          | NM_029468:18289         | Zfp821        | INSIDE                 | 1.210                                                        | 2.173                          | 2460.53            | 5345.89            | 2.629                          | 1668.51            | 4386.37            |
| A_68_P26019015 | chr8:86780899-86780943                            | NM_026423:303           | Mri1          | INSIDE                 | 1.210                                                        | 1.637                          | 1240.16            | 2029.86            | 1.981                          | 1024.56            | 2029.87            |
| A_68_P25586657 | chr7:148278318-148278362                          | NM_023059:8105          | Sigirr        | INSIDE                 | 1.210                                                        | 0.351                          | 1413.74            | 496.88             | 0.425                          | 1015.59            | 431.87             |
| A_68_P25024699 | chr7:29766684-29766728                            | NM_028659:127           | Eif3k         | INSIDE                 | 1.210                                                        | 0.410                          | 1805.29            | 739.70             | 0.496                          | 1276.41            | 632.73             |
| A_68_P24757357 | chr6:113027235-113027279                          | NR_027010:-18           | Gt(ROSA)26Sor | DIVERGENT_PROMOTER     | 1.210                                                        | 1.694                          | 815.10             | 1380.87            | 2.049                          | 636.56             | 1304.34            |
| A_68_P23577043 | chr5:31502922-31502966                            | NM_001177901:1471       | Zfp513        | INSIDE                 | 1.210                                                        | 1.429                          | 2812.49            | 4020.40            | 1.729                          | 2212.28            | 3825.83            |

| ProbeName      | Target position of probe on CpG island microarray | TargetID                | GeneSymbol    | CpG island Description | Ratio of relative methylation (TiO <sub>2</sub> -NP/Vehicle) | Sham group                     |                    |                    | TiO <sub>2</sub> -H group      |                    |                    |
|----------------|---------------------------------------------------|-------------------------|---------------|------------------------|--------------------------------------------------------------|--------------------------------|--------------------|--------------------|--------------------------------|--------------------|--------------------|
|                |                                                   |                         |               |                        |                                                              | Relative methylation (Cy5/Cy3) | Cy3 signal (Input) | Cy5 signal (MeDIP) | Relative methylation (Cy5/Cy3) | Cy3 signal (Input) | Cy5 signal (MeDIP) |
| A_68_P22970870 | chr4:63155745-63155789                            | NM_001008791:1219       | Whrn          | INSIDE                 | 1.210                                                        | 0.429                          | 2769.24            | 1187.59            | 0.519                          | 2112.61            | 1096.19            |
| A_68_P22344500 | chr3:95363378-95363422                            | NM_026489:-198          | Hormad1       | PROMOTER               | 1.210                                                        | 1.711                          | 713.83             | 1221.57            | 2.070                          | 582.22             | 1205.47            |
| A_68_P32135815 | chr19:45080453-45080497                           | NM_053164:458           | Mrpl43        | INSIDE                 | 1.209                                                        | 0.122                          | 5439.85            | 665.58             | 0.148                          | 3434.22            | 508.00             |
| A_68_P29643099 | chr14:60795734-60795778                           | ENSMUST00000140924:620  |               | INSIDE                 | 1.209                                                        | 0.489                          | 1735.64            | 848.43             | 0.591                          | 1364.34            | 806.03             |
| A_68_P26217007 | chr8:122480845-122480889                          | NM_009462:46115         | Usp10         | INSIDE                 | 1.209                                                        | 2.663                          | 1472.27            | 3920.41            | 3.220                          | 1195.76            | 3850.75            |
| A_68_P24322954 | chr6:28782175-28782219                            | NM_138682:-449          | Lrrc4         | PROMOTER               | 1.209                                                        | 0.319                          | 1526.63            | 487.61             | 0.386                          | 1341.45            | 517.95             |
| A_68_P24186284 | chr5:150438995-150439039                          | NM_013559:-126          | Hsph1         | PROMOTER               | 1.209                                                        | 0.356                          | 1401.32            | 499.15             | 0.431                          | 1127.22            | 485.44             |
| A_68_P22207890 | chr3:66785065-66785109                            | NM_013665:607           | Shox2         | INSIDE                 | 1.209                                                        | 5.664                          | 653.19             | 3699.57            | 6.849                          | 588.23             | 4028.74            |
| A_68_P21752058 | chr2:152768919-152768963                          | NM_001159376:8378       | Dusp15        | INSIDE                 | 1.209                                                        | 1.952                          | 470.86             | 919.15             | 2.360                          | 398.50             | 940.46             |
| A_68_P31940699 | chr19:7686892-7686936                             | NM_025731:-144          | Hrasls5       | DIVERGENT_PROMOTER     | 1.208                                                        | 0.332                          | 2765.98            | 919.28             | 0.401                          | 2109.68            | 846.96             |
| A_68_P30762452 | chr16:52452809-52452853                           | NM_009655:280           | Alcam         | INSIDE                 | 1.208                                                        | 0.395                          | 2252.61            | 888.65             | 0.477                          | 1654.41            | 788.58             |
| A_68_P28744821 | chr12:112813339-112813383                         | NM_021516:640           | Mark3         | INSIDE                 | 1.208                                                        | 0.369                          | 1416.32            | 522.06             | 0.445                          | 1150.65            | 512.54             |
| A_68_P28549421 | chr12:76697259-76697303                           | NM_012024:-93           | Ppp2r5c       | PROMOTER               | 1.208                                                        | 0.286                          | 3449.50            | 988.07             | 0.346                          | 2404.89            | 832.00             |
| A_68_P28267484 | chr12:16901480-16901524                           | NM_009072:-281          | Rock2         | PROMOTER               | 1.208                                                        | 1.695                          | 1580.31            | 2678.09            | 2.047                          | 1188.06            | 2432.56            |
| A_68_P27288893 | chr10:80788499-80788543                           | NM_027381:4673          | 2510012J08Rik | INSIDE                 | 1.208                                                        | 1.675                          | 2203.42            | 3691.43            | 2.024                          | 1499.36            | 3034.94            |
| A_68_P24469553 | chr6:55402157-55402201                            | NM_001025372:205        | Adcyap1r1     | INSIDE                 | 1.208                                                        | 1.814                          | 1467.32            | 2662.13            | 2.191                          | 1130.30            | 2476.27            |
| A_68_P21078907 | chr2:26321004-26321048                            | NM_008714:38316         | Notch1        | INSIDE                 | 1.208                                                        | 1.836                          | 1554.48            | 2853.81            | 2.217                          | 1161.53            | 2575.60            |
| A_68_P20558185 | chr1:121545078-121545122                          | NM_145506:477           | Epb4.115      | INSIDE                 | 1.208                                                        | 0.311                          | 1429.32            | 445.04             | 0.376                          | 1107.74            | 416.55             |
| A_68_P29855890 | chr14:102007762-102007806                         | NM_001081278:624        | Tbc1d4        | INSIDE                 | 1.207                                                        | 0.235                          | 2583.18            | 606.07             | 0.283                          | 2019.12            | 571.66             |
| A_68_P24792873 | chr6:119339010-119339056                          | NM_197985:28469         | Adipor2       | INSIDE                 | 1.207                                                        | 0.271                          | 2638.21            | 715.31             | 0.327                          | 2101.54            | 687.50             |
| A_68_P24536898 | chr6:71494106-71494150                            | NM_025783:281           | Vps24         | INSIDE                 | 1.207                                                        | 2.303                          | 788.48             | 1816.12            | 2.781                          | 639.74             | 1778.80            |
| A_68_P21177699 | chr2:44412715-44412759                            | NM_172662:304406        | Gtdc1         | DOWNSTREAM             | 1.207                                                        | 0.504                          | 1664.86            | 839.17             | 0.608                          | 1248.72            | 759.55             |
| A_68_P20740950 | chr1:157820522-157820566                          | NM_001039184:-159       | Cep350        | PROMOTER               | 1.207                                                        | 1.857                          | 2041.57            | 3790.34            | 2.242                          | 1556.98            | 3490.14            |
| A_68_P31227870 | chr17:50432887-50432931                           | NM_010021:16            | Dazl          | INSIDE                 | 1.206                                                        | 2.117                          | 1399.11            | 2961.75            | 2.553                          | 1261.61            | 3220.33            |
| A_68_P29116719 | chr13:69750004-69750048                           | NM_175283:315           | Srd5a1        | INSIDE                 | 1.206                                                        | 0.298                          | 2638.87            | 786.99             | 0.360                          | 2086.18            | 750.48             |
| A_68_P28170165 | chr11:118110109-118110153                         | NM_001112699:-224       | Cytl1         | PROMOTER               | 1.206                                                        | 2.196                          | 1181.59            | 2594.29            | 2.649                          | 1252.73            | 3318.30            |
| A_68_P26890110 | chr9:122478797-122478841                          | NR_015610:-2800         | 9530059O14Rik | PROMOTER               | 1.206                                                        | 0.379                          | 2191.09            | 829.73             | 0.457                          | 1396.37            | 637.47             |
| A_68_P25579476 | chr7:146846040-146846084                          | ENSMUST00000118750:-8   |               | PROMOTER               | 1.206                                                        | 2.233                          | 2714.71            | 6063.11            | 2.694                          | 2058.94            | 5546.25            |
| A_68_P25505762 | chr7:134622580-134622624                          | NM_010183:-6132         | Fbrs          | PROMOTER               | 1.206                                                        | 2.489                          | 393.60             | 979.55             | 3.000                          | 320.21             | 960.72             |
| A_68_P24769157 | chr6:115084895-115084939                          | NM_013681:-3            | Syn2          | PROMOTER               | 1.206                                                        | 2.718                          | 1914.24            | 5202.17            | 3.277                          | 1552.24            | 5086.53            |
| A_68_P23222369 | chr4:114598689-114598733                          | NM_015758:-92           | Foxc3         | PROMOTER               | 1.206                                                        | 1.723                          | 1932.01            | 3329.67            | 2.078                          | 1658.22            | 3446.52            |
| A_68_P22733170 | chr4:12015068-12015112                            | NM_177861:14            | Tmem67        | INSIDE                 | 1.206                                                        | 0.260                          | 1889.03            | 491.51             | 0.314                          | 1425.83            | 447.58             |
| A_68_P22570417 | chr3:138405329-138405373                          | NM_019571:192           | Tspan5        | INSIDE                 | 1.206                                                        | 2.422                          | 279.64             | 677.21             | 2.920                          | 223.35             | 652.12             |
| A_68_P21079937 | chr2:26459672-26459716                            | NM_026212:36            | Agpat2        | INSIDE                 | 1.206                                                        | 1.433                          | 9973.52            | 14290.83           | 1.728                          | 7332.92            | 12667.68           |
| A_68_P32536863 | chrX:91225992-91226036                            | NR_028320:12020         | AU015836      | DOWNSTREAM             | 1.205                                                        | 2.189                          | 319.89             | 700.34             | 2.637                          | 490.12             | 1292.63            |
| A_68_P30000044 | chr15:8393984-8394028                             | NM_027707:457           | Nipbl         | INSIDE                 | 1.205                                                        | 1.848                          | 489.20             | 904.14             | 2.228                          | 443.53             | 988.07             |
| A_68_P28881067 | chr13:23461111-23461155                           | NM_001111107:-61        | Zfp322a       | PROMOTER               | 1.205                                                        | 0.213                          | 2438.98            | 520.61             | 0.257                          | 1804.57            | 464.03             |
| A_68_P28184541 | chr11:120298583-120298627                         | NM_001195023:410        | Nploc4        | INSIDE                 | 1.205                                                        | 0.452                          | 2081.25            | 941.46             | 0.545                          | 1730.26            | 943.28             |
| A_68_P26822985 | chr9:110207937-110207981                          | NM_001081381:263        | 2610002117Rik | INSIDE                 | 1.205                                                        | 0.201                          | 2201.44            | 442.62             | 0.242                          | 1720.73            | 416.88             |
| A_68_P26748151 | chr9:96531280-96531324                            | NM_053268:620           | Rasa2         | INSIDE                 | 1.205                                                        | 0.459                          | 2770.06            | 1272.72            | 0.554                          | 2343.52            | 1297.69            |
| A_68_P26345602 | chr9:20935593-20935637                            | NM_001205312:105        | Tyk2          | INSIDE                 | 1.205                                                        | 0.549                          | 1811.60            | 994.36             | 0.662                          | 1361.16            | 900.55             |
| A_68_P25410469 | chr7:117008961-117009005                          | NM_020052:211           | Scube2        | INSIDE                 | 1.205                                                        | 3.563                          | 1046.59            | 3729.15            | 4.294                          | 877.42             | 3767.53            |
| A_68_P21569908 | chr2:119302816-119302860                          | NM_026574:527           | Ino80         | INSIDE                 | 1.205                                                        | 0.358                          | 1783.85            | 638.49             | 0.431                          | 1408.56            | 607.67             |
| A_68_P32026208 | chr19:24936124-24936168                           | NM_175013:186           | Pgm5          | INSIDE                 | 1.204                                                        | 0.420                          | 1048.58            | 440.90             | 0.506                          | 820.62             | 415.38             |
| A_68_P31257917 | chr17:56856713-56856757                           | NM_178926:390           | Vmuc          | PROMOTER               | 1.204                                                        | 0.216                          | 4758.42            | 1026.60            | 0.260                          | 3054.12            | 793.29             |
| A_68_P31206428 | chr17:46464777-46464821                           | NM_145140:-2083         | Abcc10        | PROMOTER               | 1.204                                                        | 0.374                          | 1541.53            | 576.39             | 0.450                          | 1265.31            | 569.76             |
| A_68_P27552973 | chr1:13529636-3529680                             | ENSMUST00000121615:832  |               | INSIDE                 | 1.204                                                        | 0.303                          | 1552.06            | 471.01             | 0.365                          | 1150.43            | 420.26             |
| A_68_P26991381 | chr10:20879458-20879502                           | NM_001198914:1310       | Myb           | INSIDE                 | 1.204                                                        | 1.699                          | 2649.30            | 4502.22            | 2.047                          | 1211.58            | 2479.94            |
| A_68_P26803572 | chr9:106367744-106367788                          | NM_001159652:505        | Gpr62         | INSIDE                 | 1.204                                                        | 1.475                          | 1065.49            | 1571.41            | 1.776                          | 813.87             | 1445.14            |
| A_68_P26783276 | chr9:102911099-102911143                          | NM_033314:302           | Sloc2a1       | INSIDE                 | 1.204                                                        | 0.435                          | 1241.42            | 540.14             | 0.524                          | 951.93             | 498.76             |
| A_68_P26585941 | chr9:64971903-64971947                            | NM_020043:22623         | Igdec4        | INSIDE                 | 1.204                                                        | 1.749                          | 949.08             | 1659.80            | 2.106                          | 634.24             | 1335.92            |
| A_68_P25609691 | chr7:152047946-152047990                          | NM_010202:678           | Fgf4          | INSIDE                 | 1.204                                                        | 0.284                          | 1641.62            | 465.71             | 0.341                          | 1177.33            | 402.05             |
| A_68_P24908781 | chr6:143116381-143116425                          | NM_029250:653           | Etak1         | INSIDE                 | 1.204                                                        | 0.176                          | 2774.05            | 487.16             | 0.211                          | 1869.09            | 395.27             |
| A_68_P23991341 | chr5:112736511-112736555                          | NM_009419:30806         | Tpst2         | INSIDE                 | 1.204                                                        | 1.510                          | 821.95             | 1240.82            | 1.817                          | 641.41             | 1165.58            |
| A_68_P22889661 | chr4:46627029-46627073                            | NM_198664:36021         | Tbc1d2        | INSIDE                 | 1.204                                                        | 2.432                          | 1152.89            | 2804.25            | 2.930                          | 979.64             | 2870.07            |
| A_68_P21571901 | chr2:119698597-119698641                          | ENSMUST00000119698:5521 |               | DOWNSTREAM             | 1.204                                                        | 0.542                          | 2312.12            | 1252.99            | 0.652                          | 1847.25            | 1204.98            |
| A_68_P30497078 | chr15:102126593-102126637                         | NM_001014976:-109       | Espl1         | PROMOTER               | 1.203                                                        | 0.477                          | 1360.38            | 649.44             | 0.574                          | 999.09             | 573.97             |
| A_68_P30337992 | chr15:74394645-74394689                           | NM_174991:48041         | Bai1          | INSIDE                 | 1.203                                                        | 0.372                          | 1877.10            | 698.43             | 0.448                          | 1372.60            | 614.36             |
| A_68_P29668832 | chr14:65271520-65271564                           | NM_001081177:175        | Kif13b        | INSIDE                 | 1.203                                                        | 0.371                          | 3085.61            | 1144.65            | 0.446                          | 2470.66            | 1102.34            |
| A_68_P26816898 | chr9:108735159-108735203                          | NM_080437:6530          | Celsr3        | INSIDE                 | 1.203                                                        | 0.556                          | 2450.47            | 1361.43            | 0.668                          | 1927.36            | 1288.15            |
| A_68_P21640034 | chr2:132210975-132211019                          | NM_144944:187           | Chr22         | INSIDE                 | 1.203                                                        | 0.323                          | 2172.71            | 700.84             | 0.388                          | 1625.00            | 630.38             |
| A_68_P31868104 | chr18:81182542-81182586                           | NM_178280:753           | Sall3         | INSIDE                 | 1.202                                                        | 0.354                          | 1255.58            | 444.73             | 0.426                          | 950.61             | 404.79             |
| A_68_P28221298 | chr12:8305600-8305644                             | NM_013527:3138          | Gdf7          | INSIDE                 | 1.202                                                        | 2.082                          | 1726.95            | 3596.34            | 2.502                          | 1337.95            | 3347.93            |
| A_68_P27756066 | chr1:44283825-44283869                            | NM_024475:204           | Ublep1        | INSIDE                 | 1.202                                                        | 0.392                          | 1753.48            | 687.03             | 0.471                          | 1306.87            | 615.46             |
| A_68_P27077934 | chr10:39089328-39089372                           | NM_001122892:-254       | Fyn           | PROMOTER               | 1.202                                                        | 0.296                          | 9694.68            | 2871.25            | 0.356                          | 6086.34            | 2166.36            |

| ProbeName      | Target position of probe on CpG island microarray | TargetID                 | GeneSymbol    | CpG island Description | Ratio of relative methylation (TiO <sub>2</sub> -NP/Vehicle) | Sham group                     |                    |                    | TiO <sub>2</sub> -H group      |                    |                    |
|----------------|---------------------------------------------------|--------------------------|---------------|------------------------|--------------------------------------------------------------|--------------------------------|--------------------|--------------------|--------------------------------|--------------------|--------------------|
|                |                                                   |                          |               |                        |                                                              | Relative methylation (Cy5/Cy3) | Cy3 signal (Input) | Cy5 signal (MeDIP) | Relative methylation (Cy5/Cy3) | Cy3 signal (Input) | Cy5 signal (MeDIP) |
| A_68_P25532700 | chr7:139346324-139346368                          | NM_018867:78             | Cpxm2         | INSIDE                 | 1.202                                                        | 3.841                          | 2104.28            | 8082.00            | 4.618                          | 1958.18            | 9043.76            |
| A_68_P25398385 | chr7:114353404-114353448                          | NM_029660:468            | Rbmxl2        | INSIDE                 | 1.202                                                        | 1.589                          | 1054.21            | 1675.11            | 1.910                          | 1050.13            | 2006.16            |
| A_68_P25015864 | chr7:27951357-27951401                            | NM_053208:443            | Egln2         | INSIDE                 | 1.202                                                        | 0.170                          | 3522.58            | 599.91             | 0.205                          | 2527.01            | 517.37             |
| A_68_P24377801 | chr6:38484955-38484999                            | NM_025363:116            | 1110001J03Rik | INSIDE                 | 1.202                                                        | 0.431                          | 1602.63            | 690.35             | 0.518                          | 1192.09            | 617.01             |
| A_68_P23966390 | chr5:107760143-107760187                          | NM_001079873:-48         | Brdt          | PROMOTER               | 1.202                                                        | 1.959                          | 1306.55            | 2559.29            | 2.355                          | 1199.83            | 2825.20            |
| A_68_P21774855 | chr2:156866013-156866057                          | NM_001164663:38967       | 9830001H06Rik | INSIDE                 | 1.202                                                        | 2.541                          | 554.80             | 1409.93            | 3.055                          | 492.55             | 1504.74            |
| A_68_P20638618 | chr1:137210111-137210155                          | NM_011590:182            | Timm17a       | INSIDE                 | 1.202                                                        | 0.273                          | 2589.31            | 706.61             | 0.328                          | 1649.59            | 541.32             |
| A_68_P20296826 | chr1:65225580-65225625                            | NM_010497:114            | Idh1          | INSIDE                 | 1.202                                                        | 0.374                          | 1397.53            | 521.98             | 0.449                          | 1058.00            | 474.88             |
| A_68_P30580603 | chr16:18586991-18587035                           | NM_011532:50             | Tbx1          | INSIDE                 | 1.201                                                        | 0.360                          | 2071.59            | 746.02             | 0.433                          | 1487.07            | 643.38             |
| A_68_P29055508 | chr13:55614427-55614471                           | NM_001114088:352         | Pdlim7        | INSIDE                 | 1.201                                                        | 0.567                          | 3067.32            | 1737.68            | 0.681                          | 2242.24            | 1525.91            |
| A_68_P26543018 | chr9:57493508-57493552                            | NM_007783:-543           | Csk           | PROMOTER               | 1.201                                                        | 1.496                          | 721.58             | 1079.84            | 1.798                          | 606.18             | 1089.81            |
| A_68_P24981705 | chr7:17060954-17060998                            | NM_008718:1153           | Npas1         | INSIDE                 | 1.201                                                        | 0.224                          | 3744.80            | 837.27             | 0.269                          | 2942.71            | 790.44             |
| A_68_P24864234 | chr6:134870563-134870607                          | NM_009875:166            | Cdkn1b        | INSIDE                 | 1.201                                                        | 0.476                          | 3963.73            | 1886.23            | 0.572                          | 2830.26            | 1617.77            |
| A_68_P31217294 | chr17:48549181-48549225                           | NM_001110832:-57         | NfyA          | DIVERGENT_PROMOTER     | 1.200                                                        | 0.318                          | 10935.71           | 3477.58            | 0.382                          | 7384.42            | 2818.81            |
| A_68_P31006136 | chr17:3557684-3557728                             | NM_146074:7              | Tfb1m         | INSIDE                 | 1.200                                                        | 0.354                          | 3178.70            | 1125.87            | 0.425                          | 2137.29            | 908.35             |
| A_68_P28164253 | chr11:117151685-117151737                         | NM_001113487:24151       | Septin9       | INSIDE                 | 1.200                                                        | 2.475                          | 212.44             | 525.73             | 2.970                          | 217.13             | 644.98             |
| A_68_P26276226 | chr9:4260571-4260615                              |                          |               | Unknown                | 1.200                                                        | 1.674                          | 1397.36            | 2339.40            | 2.009                          | 1118.25            | 2246.17            |
| A_68_P25394536 | chr7:112959464-112959508                          | NM_025301:115            | Mrpl17        | INSIDE                 | 1.200                                                        | 0.394                          | 2723.32            | 1074.28            | 0.473                          | 1940.93            | 918.55             |
| A_68_P25261545 | chr7:86660396-86660440                            | ENSMUST00000150985:301   |               | INSIDE                 | 1.200                                                        | 1.521                          | 1512.18            | 2299.49            | 1.825                          | 1131.75            | 2065.97            |
| A_68_P24994417 | chr7:20214353-20214397                            | NM_009046:413            | Relb          | INSIDE                 | 1.200                                                        | 0.398                          | 3398.68            | 1353.16            | 0.478                          | 2331.50            | 1113.84            |
| A_68_P22049383 | chr3:34548418-34548462                            | NM_011443:-486           | Sox2          | PROMOTER               | 1.200                                                        | 0.150                          | 3667.76            | 549.91             | 0.180                          | 2699.83            | 485.93             |
| A_68_P20348980 | chr1:74552200-74552244                            | NM_021383:-411           | Rqcd1         | PROMOTER               | 1.200                                                        | 0.163                          | 5136.77            | 838.28             | 0.196                          | 3847.01            | 753.11             |
| A_68_P32536213 | chrX:91077623-91077667                            | NM_145630:-210           | Pdk3          | PROMOTER               | 1.199                                                        | 2.264                          | 757.29             | 1714.32            | 2.715                          | 776.53             | 2108.38            |
| A_68_P32364065 | chrX:45698842-45698886                            | NM_178782:4330           | Bcor1         | INSIDE                 | 1.199                                                        | 2.293                          | 633.42             | 1452.22            | 2.749                          | 766.99             | 2108.65            |
| A_68_P31112416 | chr17:26918138-26918182                           | NM_172149:137            | Bnip1         | INSIDE                 | 1.199                                                        | 0.223                          | 2345.85            | 523.44             | 0.267                          | 1733.93            | 463.74             |
| A_68_P28291793 | chr12:25515677-25515721                           | NM_001083341:-765        | Mboat2        | PROMOTER               | 1.199                                                        | 16.018                         | 1261.34            | 20204.30           | 19.207                         | 1498.06            | 28773.75           |
| A_68_P26971602 | chr10:17443634-17443678                           | NM_010828:623            | Cited4        | INSIDE                 | 1.199                                                        | 0.233                          | 4223.75            | 984.84             | 0.280                          | 3168.59            | 886.11             |
| A_68_P25022018 | chr7:29244235-29244279                            | NM_001141921:7000        | Lrfn1         | INSIDE                 | 1.199                                                        | 2.281                          | 786.29             | 1793.56            | 2.734                          | 613.44             | 1677.14            |
| A_68_P23210414 | chr4:111087603-111087647                          | NM_026279:14             | Bend5         | INSIDE                 | 1.199                                                        | 1.887                          | 2131.70            | 4022.14            | 2.261                          | 1651.39            | 3734.60            |
| A_68_P31834370 | chr18:75160579-75160623                           | NR_028552:-121           | Snord58b      | PROMOTER               | 1.198                                                        | 0.252                          | 2136.70            | 538.59             | 0.302                          | 1743.51            | 526.70             |
| A_68_P29613713 | chr14:55305483-55305527                           | NM_001085473:264         | Acin1         | INSIDE                 | 1.198                                                        | 1.520                          | 1637.40            | 2489.30            | 1.822                          | 1194.13            | 2175.36            |
| A_68_P28056108 | chr11:98248019-98248063                           | NM_008890:95             | Pnmt          | INSIDE                 | 1.198                                                        | 0.402                          | 2122.65            | 852.60             | 0.481                          | 1679.16            | 807.77             |
| A_68_P25092513 | chr7:52594761-52594805                            | NM_029741:27607          | Ppfia3        | INSIDE                 | 1.198                                                        | 1.587                          | 640.62             | 1016.48            | 1.901                          | 467.52             | 888.96             |
| A_68_P31601517 | chr18:32322542-32322586                           | NM_011946:-178           | Map3k2        | PROMOTER               | 1.197                                                        | 2.261                          | 465.55             | 1052.63            | 2.707                          | 416.86             | 1128.47            |
| A_68_P28155402 | chr1:115664810-115664854                          | NM_080643:10074          | Caskin2       | INSIDE                 | 1.197                                                        | 1.818                          | 994.11             | 1807.49            | 2.176                          | 690.47             | 1502.52            |
| A_68_P28003251 | chr11:88860482-88860526                           | NM_009546:-212           | Trim25        | PROMOTER               | 1.197                                                        | 0.488                          | 1602.92            | 781.62             | 0.584                          | 1195.66            | 698.08             |
| A_68_P25724985 | chr8:26149132-26149176                            | NM_001081187:280         | Htra4         | INSIDE                 | 1.197                                                        | 2.500                          | 950.00             | 2375.43            | 2.993                          | 862.89             | 2582.85            |
| A_68_P25094661 | chr7:52968968-52969012                            | NM_020011:1587           | Sphk2         | INSIDE                 | 1.197                                                        | 1.414                          | 1175.57            | 1661.68            | 1.691                          | 965.85             | 1633.60            |
| A_68_P24617030 | chr6:87540705-87540749                            | NM_021381:-31            | Prokr1        | PROMOTER               | 1.197                                                        | 0.308                          | 3575.60            | 1102.94            | 0.369                          | 2514.43            | 928.39             |
| A_68_P31958296 | chr19:11952929-11952973                           | NM_001011775:-7246       | Olfr1419      | PROMOTER               | 1.196                                                        | 1.574                          | 1350.64            | 2125.56            | 1.883                          | 1136.18            | 2139.27            |
| A_68_P31142305 | chr17:31991956-31992000                           | NM_010831:759            | Sik1          | INSIDE                 | 1.196                                                        | 0.425                          | 1809.98            | 768.91             | 0.508                          | 1392.42            | 707.26             |
| A_68_P31029165 | chr17:8993570-8993614                             | NM_011866:-1017          | Pde10a        | PROMOTER               | 1.196                                                        | 1.723                          | 2033.33            | 3503.98            | 2.062                          | 1493.65            | 3079.64            |
| A_68_P30360708 | chr15:78370197-78370241                           | NM_009218:4557           | Sstr3         | INSIDE                 | 1.196                                                        | 1.502                          | 1015.87            | 1525.96            | 1.797                          | 875.19             | 1572.94            |
| A_68_P28924080 | chr13:31718919-31718963                           | NM_010225:1256           | Foxf2         | INSIDE                 | 1.196                                                        | 0.268                          | 3113.15            | 833.39             | 0.320                          | 2195.73            | 702.85             |
| A_68_P28530004 | chr12:73172194-73172239                           | NM_181752:-238           | Gpr135        | PROMOTER               | 1.196                                                        | 0.443                          | 1336.89            | 592.86             | 0.530                          | 1049.76            | 556.56             |
| A_68_P27540751 | chr10:127759837-127759881                         | NM_019953:344            | Cnpy2         | INSIDE                 | 1.196                                                        | 0.439                          | 3478.05            | 1528.30            | 0.525                          | 2512.70            | 1320.10            |
| A_68_P25890689 | chr8:59819744-59819788                            | ENSMUST00000132988:852   |               | DOWNSTREAM             | 1.196                                                        | 2.799                          | 1054.82            | 2952.26            | 3.347                          | 727.08             | 2433.72            |
| A_68_P25780170 | chr8:36558186-36558230                            | NM_026067:379            | Eri1          | INSIDE                 | 1.196                                                        | 0.494                          | 1689.38            | 833.92             | 0.591                          | 1308.63            | 772.78             |
| A_68_P23574737 | chr5:31111705-311117149                           | NM_133350:-2             | Mapre3        | PROMOTER               | 1.196                                                        | 1.541                          | 613.68             | 945.92             | 1.844                          | 512.57             | 945.05             |
| A_68_P23341303 | chr4:137237621-137237665                          | NM_001081155:25          | Rap1gap       | INSIDE                 | 1.196                                                        | 0.159                          | 3133.15            | 496.87             | 0.190                          | 2335.90            | 442.96             |
| A_68_P22199717 | chr3:65196220-65196264                            | NM_026155:233            | Ssr3          | INSIDE                 | 1.196                                                        | 0.174                          | 7469.40            | 1297.17            | 0.208                          | 5185.42            | 1077.14            |
| A_68_P21680286 | chr2:139503286-139503330                          | NM_001126490:-605        | Isml          | PROMOTER               | 1.196                                                        | 0.258                          | 3001.58            | 774.40             | 0.309                          | 2202.59            | 679.61             |
| A_68_P23574106 | chr5:31014351-31014395                            | NM_023047:105            | Dpysl5        | INSIDE                 | 1.195                                                        | 0.273                          | 5138.30            | 1404.40            | 0.326                          | 3413.44            | 1114.48            |
| A_68_P23270673 | chr4:124528328-124528372                          | NM_153566:348            | Yrdc          | INSIDE                 | 1.195                                                        | 4.452                          | 179.05             | 797.22             | 5.322                          | 132.78             | 706.60             |
| A_68_P21099539 | chr2:29658324-29658368                            | NM_011989:147            | Slc27a4       | INSIDE                 | 1.195                                                        | 0.552                          | 3098.36            | 1711.19            | 0.660                          | 2201.71            | 1453.58            |
| A_68_P20616242 | chr1:133423393-133423437                          | NM_001081011:524         | Srgap2        | INSIDE                 | 1.195                                                        | 0.275                          | 3029.11            | 832.82             | 0.329                          | 2025.26            | 665.36             |
| A_68_P28563523 | chr12:79327207-79327251                           | NM_145965:-413           | Gphn          | PROMOTER               | 1.194                                                        | 0.445                          | 1394.89            | 620.15             | 0.531                          | 1284.30            | 681.66             |
| A_68_P27995148 | chr11:87430476-87430520                           | NM_001045527:-167        | Hsf5          | PROMOTER               | 1.194                                                        | 2.724                          | 710.37             | 1935.09            | 3.254                          | 632.21             | 2057.12            |
| A_68_P27937764 | chr11:77285096-77285140                           | NM_172945:18062          | Ankrd13b      | INSIDE                 | 1.194                                                        | 1.397                          | 1523.46            | 2127.97            | 1.667                          | 1142.59            | 1905.22            |
| A_68_P26018414 | chr8:86671587-86671631                            | NM_145970:44             | Cc2d1a        | INSIDE                 | 1.194                                                        | 0.332                          | 1988.97            | 660.05             | 0.396                          | 1501.56            | 595.05             |
| A_68_P25843139 | chr8:48798999-48799043                            | NM_172407:265            | Cdkn2aip      | INSIDE                 | 1.194                                                        | 0.474                          | 1328.32            | 629.40             | 0.566                          | 988.30             | 559.22             |
| A_68_P25512274 | A_68_P25512274                                    |                          |               | Unknown                | 1.194                                                        | 1.584                          | 931.85             | 1476.37            | 1.892                          | 763.24             | 1443.93            |
| A_68_P24141721 | chr5:140981647-140981691                          | NM_021528:106            | Chst12        | INSIDE                 | 1.194                                                        | 0.383                          | 4743.33            | 1815.18            | 0.457                          | 3521.73            | 1609.30            |
| A_68_P22286850 | chr3:83570771-83570815                            | NM_009144:550            | Sfrp2         | INSIDE                 | 1.194                                                        | 0.460                          | 1302.53            | 599.45             | 0.549                          | 943.08             | 518.13             |
| A_68_P32565191 | chrX:98891432-98891476                            | ENSMUST00000073812:-4265 |               | PROMOTER               | 1.193                                                        | 2.391                          | 474.10             | 1133.65            | 2.852                          | 750.55             | 2140.88            |

| ProbeName      | Target position of probe on CpG island microarray | TargetID           | GeneSymbol    | CpG island Description | Ratio of relative methylation (TiO <sub>2</sub> -NP/Vehicle) | Sham group                     |                    |                    | TiO <sub>2</sub> -H group      |                    |                    |
|----------------|---------------------------------------------------|--------------------|---------------|------------------------|--------------------------------------------------------------|--------------------------------|--------------------|--------------------|--------------------------------|--------------------|--------------------|
|                |                                                   |                    |               |                        |                                                              | Relative methylation (Cy5/Cy3) | Cy3 signal (Input) | Cy5 signal (MeDIP) | Relative methylation (Cy5/Cy3) | Cy3 signal (Input) | Cy5 signal (MeDIP) |
| A_68_P30718912 | chr16:43979481-43979525                           | NM_001007460:-339  | Zdhhc23       | PROMOTER               | 1.193                                                        | 0.338                          | 1409.19            | 476.02             | 0.403                          | 1175.13            | 473.60             |
| A_68_P29671485 | chr14:65695365-65695412                           | NM_018788:-21555   | Extl3         | INSIDE                 | 1.193                                                        | 1.596                          | 635.02             | 1013.19            | 1.903                          | 436.42             | 830.45             |
| A_68_P29130723 | chr13:72100965-72101009                           | NM_010573:185      | Irx1          | INSIDE                 | 1.193                                                        | 0.560                          | 2578.54            | 1442.88            | 0.668                          | 2005.41            | 1338.87            |
| A_68_P26023615 | chr8:87604389-87604433                            | NM_026399:-235     | Wdr83         | INSIDE                 | 1.193                                                        | 0.304                          | 4658.02            | 1414.46            | 0.362                          | 3187.00            | 1154.29            |
| A_68_P25496221 | chr7:132850823-132850867                          | NM_207239:358      | Gtf3c1        | INSIDE                 | 1.193                                                        | 0.102                          | 4310.39            | 440.04             | 0.122                          | 3187.31            | 388.13             |
| A_68_P24151769 | chr5:142939785-142939829                          | NM_172725:-78      | C330006K01Rik | PROMOTER               | 1.193                                                        | 0.490                          | 1963.57            | 962.48             | 0.585                          | 1385.86            | 810.61             |
| A_68_P22888257 | chr4:46356845-46356889                            | NM_183298:-199     | Foxe1         | PROMOTER               | 1.193                                                        | 0.349                          | 1485.26            | 518.90             | 0.417                          | 1193.11            | 497.10             |
| A_68_P20646991 | chr1:138521544-138521595                          | NM_001160251:92    | Zfp281        | INSIDE                 | 1.193                                                        | 1.711                          | 487.78             | 834.66             | 2.041                          | 400.73             | 817.73             |
| A_68_P31867986 | chr18:81168668-81168712                           | NM_178280:14627    | Sall3         | INSIDE                 | 1.192                                                        | 1.797                          | 824.78             | 1481.80            | 2.142                          | 659.84             | 1413.45            |
| A_68_P30966735 | chr16:92059004-92059048                           | NM_080456:446      | Mrps6         | INSIDE                 | 1.192                                                        | 0.353                          | 2214.24            | 782.70             | 0.421                          | 1602.29            | 675.31             |
| A_68_P29222294 | chr13:92901468-92901512                           | NM_009027:-41      | Rasgrf2       | PROMOTER               | 1.192                                                        | 0.432                          | 1301.99            | 563.07             | 0.515                          | 1066.45            | 549.72             |
| A_68_P24743884 | chr6:110595643-110595687                          | NM_177328:73       | Grim7         | INSIDE                 | 1.192                                                        | 0.169                          | 3812.96            | 644.57             | 0.202                          | 2827.30            | 569.91             |
| A_68_P22071617 | chr3:38787100-38787144                            | NM_183221:1261     | Fat4          | INSIDE                 | 1.192                                                        | 0.276                          | 1781.59            | 491.08             | 0.329                          | 1276.02            | 419.32             |
| A_68_P31151048 | chr17:34066906-34066950                           | NM_009059:90       | Rgl2          | INSIDE                 | 1.191                                                        | 0.376                          | 3099.73            | 1166.90            | 0.448                          | 2089.05            | 936.67             |
| A_68_P29941247 | chr14:119254329-119254375                         | NM_001160099:181   | Cldn10        | INSIDE                 | 1.191                                                        | 2.131                          | 395.91             | 843.87             | 2.538                          | 362.86             | 920.96             |
| A_68_P29675225 | chr14:66349795-66349839                           | NM_001168318:64577 | Scara5        | INSIDE                 | 1.191                                                        | 1.816                          | 990.35             | 1798.09            | 2.163                          | 811.45             | 1754.77            |
| A_68_P27259491 | chr10:75398745-75398789                           | NM_175329:449      | Cchcd10       | INSIDE                 | 1.191                                                        | 0.220                          | 2501.66            | 549.30             | 0.261                          | 1816.74            | 474.98             |
| A_68_P27256916 | chr10:74980191-74980235                           | NM_175133:-145     | 1110038D17Rik | DIVERGENT_PROMOTER     | 1.191                                                        | 0.355                          | 1487.55            | 527.53             | 0.423                          | 1267.35            | 535.48             |
| A_68_P27094093 | chr10:41997793-41997837                           | NM_019740:-1266    | Foxo3         | PROMOTER               | 1.191                                                        | 0.452                          | 1901.95            | 858.90             | 0.538                          | 1510.34            | 812.41             |
| A_68_P25780627 | chr8:36650640-36650684                            | NM_001081279:-189  | Mflas1        | PROMOTER               | 1.191                                                        | 0.306                          | 1869.13            | 572.00             | 0.365                          | 1433.66            | 522.69             |
| A_68_P25505917 | chr7:134656518-134656562                          | NR_024331:-157     | 1700008J07Rik | PROMOTER               | 1.191                                                        | 0.420                          | 1449.26            | 609.25             | 0.501                          | 1109.24            | 555.55             |
| A_68_P24593027 | chr6:83318037-83318081                            | NM_183138:73614    | Tet3          | INSIDE                 | 1.191                                                        | 1.501                          | 726.11             | 1090.14            | 1.788                          | 703.04             | 1256.71            |
| A_68_P32567037 | chrX:99266374-99266418                            | NM_183318:250      | Rgag4         | INSIDE                 | 1.190                                                        | 1.936                          | 1798.24            | 3482.15            | 2.304                          | 2307.36            | 5316.97            |
| A_68_P26273049 | chr9:3199691-3199735                              | NR_027988:101      | 4930433N12Rik | INSIDE                 | 1.190                                                        | 7.651                          | 3269.02            | 25010.24           | 9.101                          | 2174.29            | 19787.41           |
| A_68_P25837692 | chr8:47826584-47826628                            | NM_008391:1508     | Irf2          | INSIDE                 | 1.190                                                        | 1.546                          | 547.86             | 846.78             | 1.840                          | 511.85             | 941.66             |
| A_68_P23311790 | chr4:131885707-131885751                          | NM_027925:-275     | Tmau1ap       | PROMOTER               | 1.190                                                        | 0.413                          | 1937.79            | 801.10             | 0.492                          | 1532.28            | 753.52             |
| A_68_P23091881 | chr4:88367948-88367992                            | NM_172871:442      | Klhl9         | INSIDE                 | 1.190                                                        | 1.372                          | 1702.46            | 2335.31            | 1.632                          | 1349.34            | 2201.96            |
| A_68_P22408057 | chr3:107499480-107499524                          | NM_145542:-36      | Ahey1l        | PROMOTER               | 1.190                                                        | 0.219                          | 2415.64            | 529.02             | 0.261                          | 1659.14            | 432.42             |
| A_68_P20268941 | chr1:60466118-60466162                            | NM_001198570:-322  | Abi2          | PROMOTER               | 1.190                                                        | 0.346                          | 1424.77            | 492.29             | 0.411                          | 1195.03            | 491.50             |
| A_68_P31097619 | chr17:24625915-24625959                           | NM_027937:209      | Caskin1       | INSIDE                 | 1.189                                                        | 4.370                          | 2619.40            | 11446.77           | 5.194                          | 2335.25            | 12130.40           |
| A_68_P27997244 | chr1:187800515-87800559                           | NM_001168472:-449  | Dynll2        | PROMOTER               | 1.189                                                        | 1.517                          | 541.40             | 821.04             | 1.804                          | 539.94             | 973.96             |
| A_68_P27880946 | chr1:166908183-66908227                           | NM_001099635:16403 | Mylb3         | INSIDE                 | 1.189                                                        | 2.432                          | 311.34             | 757.26             | 2.893                          | 392.78             | 1136.30            |
| A_68_P27784888 | chr1:149608283-49608327                           | NM_013529:648      | Gfp2          | INSIDE                 | 1.189                                                        | 0.352                          | 1425.01            | 501.96             | 0.419                          | 1077.50            | 451.11             |
| A_68_P27289087 | chr10:80820153-80820197                           | NM_028657:-140     | F630110N24Rik | DIVERGENT_PROMOTER     | 1.189                                                        | 1.817                          | 1252.98            | 2276.46            | 2.160                          | 1068.78            | 2308.52            |
| A_68_P20161229 | chr1:38683722-38683766                            | NM_010678:38056    | Aif3          | INSIDE                 | 1.189                                                        | 0.424                          | 1609.29            | 682.81             | 0.504                          | 1172.37            | 591.29             |
| A_68_P28452660 | chr12:56701063-56701107                           | NM_020287:1181     | Insm2         | INSIDE                 | 1.188                                                        | 0.340                          | 2062.19            | 700.67             | 0.404                          | 1614.75            | 651.86             |
| A_68_P27674922 | chr11:29426519-29426563                           | NM_133767:84       | Mti2          | INSIDE                 | 1.188                                                        | 0.457                          | 1146.49            | 524.35             | 0.543                          | 1029.62            | 559.26             |
| A_68_P27446113 | chr10:110357232-110357276                         | NM_007792:23       | Csrp2         | INSIDE                 | 1.188                                                        | 0.487                          | 2721.42            | 1325.33            | 0.579                          | 2129.44            | 1232.26            |
| A_68_P26659639 | chr9:78296196-78296240                            | NM_026658:202      | Mto1          | INSIDE                 | 1.188                                                        | 2.245                          | 925.24             | 2076.86            | 2.666                          | 536.64             | 1430.48            |
| A_68_P26550030 | chr9:58670732-58670776                            | NM_001081192:-564  | Hcn4          | PROMOTER               | 1.188                                                        | 2.571                          | 546.67             | 1405.49            | 3.055                          | 455.60             | 1391.89            |
| A_68_P24059429 | chr5:124573689-124573733                          | NM_011256:92717    | Pitpnm2       | INSIDE                 | 1.188                                                        | 2.884                          | 830.26             | 2394.56            | 3.425                          | 647.48             | 2217.61            |
| A_68_P21489524 | chr2:104333565-104333609                          | NM_001145824:1060  | Hipk3         | INSIDE                 | 1.188                                                        | 1.897                          | 5429.51            | 10298.87           | 2.253                          | 3848.77            | 8669.53            |
| A_68_P30364603 | chr15:78971259-78971303                           | NM_138581:401      | 1700088E04Rik | INSIDE                 | 1.187                                                        | 0.416                          | 1076.77            | 447.82             | 0.494                          | 807.07             | 398.40             |
| A_68_P29737459 | chr14:77436746-77436790                           | NM_175369:190      | Ccdc122       | INSIDE                 | 1.187                                                        | 0.378                          | 1274.15            | 481.56             | 0.449                          | 1055.83            | 473.62             |
| A_68_P27846981 | chr11:60988586-60988630                           | NM_001004143:-47   | Usp22         | PROMOTER               | 1.187                                                        | 0.212                          | 3657.66            | 774.00             | 0.251                          | 2694.37            | 676.62             |
| A_68_P25021461 | chr7:29156631-29156675                            | NM_001083912:1029  | Plekhh2       | INSIDE                 | 1.187                                                        | 0.386                          | 1815.27            | 700.94             | 0.458                          | 1430.38            | 655.73             |
| A_68_P24298747 | chr6:23789611-23789655                            | NM_153163:-332     | Cadps2        | PROMOTER               | 1.187                                                        | 1.450                          | 2518.00            | 3650.78            | 1.721                          | 1871.47            | 3220.56            |
| A_68_P24163027 | chr5:145612055-145612099                          | NM_001081362:82416 | Trrap         | INSIDE                 | 1.187                                                        | 1.716                          | 773.17             | 1326.76            | 2.036                          | 590.17             | 1201.71            |
| A_68_P21754299 | chr2:153171488-153171547                          | NM_001039939:-357  | Asxl1         | PROMOTER               | 1.187                                                        | 3.699                          | 149.65             | 553.61             | 4.390                          | 150.68             | 661.46             |
| A_68_P32260813 | chrX:11737388-11737432                            | NM_001168321:71    | Beor          | INSIDE                 | 1.186                                                        | 2.041                          | 380.86             | 777.48             | 2.421                          | 380.77             | 921.99             |
| A_68_P31102615 | chr17:25392896-25392940                           | NM_001163270:391   | Baiap3        | INSIDE                 | 1.186                                                        | 0.295                          | 1778.57            | 524.11             | 0.350                          | 1255.63            | 438.84             |
| A_68_P29638536 | chr14:60059932-60059976                           | NM_026908:137      | Cab39l        | INSIDE                 | 1.186                                                        | 0.347                          | 2733.07            | 949.11             | 0.412                          | 1940.70            | 799.04             |
| A_68_P28931376 | chr13:32893858-32893902                           | NM_030215:-18      | Wrmip1        | PROMOTER               | 1.186                                                        | 0.241                          | 1994.53            | 480.89             | 0.286                          | 1422.58            | 406.72             |
| A_68_P27894433 | chr11:69154419-69154463                           | NR_027827:170      | A030009H04Rik | INSIDE                 | 1.186                                                        | 0.597                          | 4647.66            | 2776.79            | 0.708                          | 3289.95            | 2330.53            |
| A_68_P27287684 | chr10:80606810-80606854                           | NM_010731:7817     | Zbtb7a        | INSIDE                 | 1.186                                                        | 2.237                          | 398.15             | 890.56             | 2.654                          | 333.72             | 885.56             |
| A_68_P23979843 | chr5:110877476-110877520                          | NM_001142642:24    | Fbrs1l        | INSIDE                 | 1.186                                                        | 0.289                          | 1864.55            | 539.50             | 0.343                          | 1341.62            | 460.47             |
| A_68_P21311407 | chr2:69699641-69699685                            | NM_001110145:44    | Ssb           | INSIDE                 | 1.186                                                        | 0.290                          | 1710.32            | 496.14             | 0.344                          | 1451.38            | 499.31             |
| A_68_P32099206 | chr19:38129609-38129653                           | NM_001164362:99    | Cep55         | INSIDE                 | 1.185                                                        | 0.440                          | 1018.37            | 448.12             | 0.521                          | 819.62             | 427.38             |
| A_68_P31143943 | chr17:32280673-32280717                           | NM_008716:23103    | Notch3        | INSIDE                 | 1.185                                                        | 0.353                          | 2380.94            | 840.83             | 0.419                          | 1708.01            | 714.89             |
| A_68_P30346023 | chr15:75922119-75922163                           | NM_144847:-1697    | Nrbp2         | PROMOTER               | 1.185                                                        | 0.445                          | 2190.81            | 974.97             | 0.528                          | 1612.26            | 850.49             |
| A_68_P29699019 | chr14:70477604-70477648                           | NM_018781:375      | Egr3          | INSIDE                 | 1.185                                                        | 0.198                          | 2217.60            | 439.04             | 0.235                          | 1608.31            | 377.24             |
| A_68_P29075345 | chr13:58907821-58907865                           | NM_008745:-114     | Ntrk2         | PROMOTER               | 1.185                                                        | 0.239                          | 1987.29            | 474.19             | 0.283                          | 1461.66            | 413.46             |
| A_68_P28470861 | chr12:60320508-60320552                           | NM_001033156:-60   | Fbxo33        | PROMOTER               | 1.185                                                        | 0.457                          | 1336.51            | 610.65             | 0.542                          | 1134.72            | 614.46             |
| A_68_P27892697 | chr11:68853623-68853667                           | NM_011496:-5500    | Aurkb         | PROMOTER               | 1.185                                                        | 0.478                          | 1243.98            | 594.60             | 0.567                          | 955.98             | 541.59             |
| A_68_P27033723 | chr10:28916701-28916745                           | NM_026138:52921    | 6330407J23Rik | INSIDE                 | 1.185                                                        | 2.017                          | 1853.51            | 3738.08            | 2.389                          | 1528.16            | 3650.73            |

| ProbeName       | Target position of probe on CpG island microarray | TargetID            | GeneSymbol    | CpG island Description | Ratio of relative methylation (TiO <sub>2</sub> -NP/Vehicle) | Sham group                     |                    |                    | TiO <sub>2</sub> -H group      |                    |                    |
|-----------------|---------------------------------------------------|---------------------|---------------|------------------------|--------------------------------------------------------------|--------------------------------|--------------------|--------------------|--------------------------------|--------------------|--------------------|
|                 |                                                   |                     |               |                        |                                                              | Relative methylation (Cy5/Cy3) | Cy3 signal (Input) | Cy5 signal (MeDIP) | Relative methylation (Cy5/Cy3) | Cy3 signal (Input) | Cy5 signal (MeDIP) |
| A_68_P26816846  | chr9:108729372-108729416                          | NM_080437:744       | Celsr3        | INSIDE                 | 1.185                                                        | 0.139                          | 3678.16            | 509.61             | 0.164                          | 2615.21            | 429.48             |
| A_68_P26663737  | chr9:79190663-79190707                            |                     |               | Unknown                | 1.185                                                        | 1.485                          | 2733.28            | 4058.19            | 1.759                          | 2078.71            | 3656.55            |
| A_68_P23891543  | chr5:92392231-92392285                            | NM_026557:-164      | Rchyl1        | PROMOTER               | 1.185                                                        | 1.508                          | 698.96             | 1054.26            | 1.787                          | 546.86             | 977.10             |
| A_68_P21755508  | chr2:153355057-153355101                          | NM_001134300:629    | 8430427H17Rik | INSIDE                 | 1.185                                                        | 0.194                          | 4974.64            | 966.20             | 0.230                          | 3249.40            | 748.04             |
| A_68_P31897794  | chr18:86565038-86565082                           | NM_144946:717       | Neto1         | INSIDE                 | 1.184                                                        | 0.585                          | 3384.86            | 1978.50            | 0.692                          | 2409.97            | 1668.38            |
| A_68_P311135104 | chr17:30749389-30749433                           | NM_001113560:194    | Glo1          | INSIDE                 | 1.184                                                        | 3.481                          | 689.10             | 2398.47            | 4.120                          | 522.05             | 2150.64            |
| A_68_P30280956  | chr15:64144021-64144065                           | NM_010026:70439     | Asap1         | INSIDE                 | 1.184                                                        | 0.406                          | 1759.31            | 714.23             | 0.481                          | 1313.29            | 631.06             |
| A_68_P29220644  | chr13:91947270-91947314                           | NM_145453:9         | Zcche9        | INSIDE                 | 1.184                                                        | 0.381                          | 1921.00            | 731.52             | 0.451                          | 1639.46            | 739.39             |
| A_68_P28950041  | chr13:36670784-36670828                           | AK135154:191265     |               | INSIDE                 | 1.184                                                        | 0.326                          | 1675.62            | 546.33             | 0.386                          | 1342.97            | 518.60             |
| A_68_P28376185  | chr12:40764703-40764747                           | NM_001039515:-150   | Arl4a         | PROMOTER               | 1.184                                                        | 1.771                          | 435.81             | 771.62             | 2.096                          | 467.21             | 979.36             |
| A_68_P28084545  | chr11:103173341-103173385                         |                     |               | Unknown                | 1.184                                                        | 0.335                          | 1579.78            | 529.37             | 0.397                          | 1248.63            | 495.59             |
| A_68_P27629548  | chr11:19921114-19921161                           | NM_033523:96693     | Spred2        | INSIDE                 | 1.184                                                        | 3.147                          | 272.22             | 856.61             | 3.727                          | 274.54             | 1023.30            |
| A_68_P26630945  | chr9:72887670-72887714                            | NM_018889:-186      | Pigb          | DIVERGENT_PROMOTER     | 1.184                                                        | 1.767                          | 848.08             | 1498.97            | 2.092                          | 808.35             | 1691.20            |
| A_68_P26374354  | chr9:26962948-26962992                            | NM_023277:36        | Jam3          | INSIDE                 | 1.184                                                        | 0.564                          | 2647.75            | 1492.68            | 0.667                          | 2067.00            | 1379.38            |
| A_68_P25948521  | chr8:72411450-72411494                            | NM_026818:-181      | Cilp2         | PROMOTER               | 1.184                                                        | 0.308                          | 2563.57            | 788.33             | 0.364                          | 1875.65            | 682.98             |
| A_68_P25585441  | chr7:148067881-148067925                          | NM_001127351:-134   | Sirt3         | PROMOTER               | 1.184                                                        | 0.296                          | 2231.87            | 659.73             | 0.350                          | 1745.19            | 610.64             |
| A_68_P25409558  | chr7:116847343-116847387                          | NM_020616:114       | D930014E17Rik | INSIDE                 | 1.184                                                        | 0.265                          | 1743.29            | 462.58             | 0.314                          | 1400.54            | 440.15             |
| A_68_P21703962  | chr2:143688269-143688313                          | NM_009751:619       | Bfsp1         | INSIDE                 | 1.184                                                        | 0.184                          | 3297.93            | 608.04             | 0.218                          | 2455.15            | 536.03             |
| A_68_P32290860  | chrX:20539394-20539453                            | NR_027446:184       | A230072C01Rik | INSIDE                 | 1.183                                                        | 2.278                          | 386.92             | 881.45             | 2.695                          | 356.80             | 961.61             |
| A_68_P28248077  | chr12:13255581-13255625                           | NM_134040:378       | Ddx1          | INSIDE                 | 1.183                                                        | 0.470                          | 1819.93            | 856.14             | 0.556                          | 1337.62            | 744.26             |
| A_68_P26013517  | chr8:85689748-85689792                            | NM_001111304:520    | Tbcd19        | INSIDE                 | 1.183                                                        | 0.284                          | 2129.00            | 604.84             | 0.336                          | 1555.92            | 522.80             |
| A_68_P25090602  | chr7:52263044-52263088                            | NM_001008422:8553   | Scaf1         | INSIDE                 | 1.183                                                        | 2.075                          | 1270.29            | 2635.58            | 2.454                          | 858.07             | 2106.09            |
| A_68_P23397710  | chr4:148325835-148325879                          | NM_001159344:147356 | Cas2l         | INSIDE                 | 1.183                                                        | 0.522                          | 2520.96            | 1315.01            | 0.617                          | 1797.54            | 1108.84            |
| A_68_P23364322  | chr4:141034341-141034385                          | NM_019763:60150     | Spn           | INSIDE                 | 1.183                                                        | 1.715                          | 882.16             | 1512.81            | 2.029                          | 771.26             | 1565.08            |
| A_68_P23335793  | chr4:136326759-136326803                          | NM_010142:65070     | Ephb2         | INSIDE                 | 1.183                                                        | 1.990                          | 1284.61            | 2556.52            | 2.354                          | 987.74             | 2325.57            |
| A_68_P20625766  | chr1:135027721-135027765                          | NM_133819:0         | Ppp1r15b      | INSIDE                 | 1.183                                                        | 0.553                          | 2527.27            | 1396.34            | 0.654                          | 1865.30            | 1219.11            |
| A_68_P31151558  | chr17:34162154-34162198                           | NR_029800:-139      | Mir219-1      | PROMOTER               | 1.182                                                        | 0.129                          | 3886.31            | 502.51             | 0.153                          | 2552.29            | 389.96             |
| A_68_P28072079  | chr11:100980744-100980788                         | NM_026501:372       | Fam134c       | INSIDE                 | 1.182                                                        | 1.814                          | 5546.84            | 10064.69           | 2.144                          | 3954.99            | 8480.60            |
| A_68_P27287762  | chr10:80616963-80617007                           | NM_021501:13481     | Pias4         | INSIDE                 | 1.182                                                        | 2.127                          | 879.17             | 1870.05            | 2.514                          | 824.56             | 2072.57            |
| A_68_P26846410  | chr9:114690555-114690599                          | NM_133978:371       | Cmtm7         | INSIDE                 | 1.182                                                        | 0.273                          | 2003.56            | 546.81             | 0.323                          | 1528.30            | 493.03             |
| A_68_P25951146  | chr8:72855029-72855073                            | NM_008107:1387      | Gdf1          | INSIDE                 | 1.182                                                        | 0.408                          | 1136.54            | 463.71             | 0.482                          | 902.25             | 435.00             |
| A_68_P25715446  | chr8:24318402-24318446                            | NM_018743:501       | Agpat6        | INSIDE                 | 1.182                                                        | 0.366                          | 2397.04            | 876.38             | 0.432                          | 1766.68            | 763.60             |
| A_68_P25357342  | chr7:105851579-105851623                          | NM_028410:-272      | Prkir         | PROMOTER               | 1.182                                                        | 0.261                          | 2454.40            | 640.93             | 0.309                          | 1850.60            | 570.97             |
| A_68_P24773305  | chr6:115803441-115803485                          | NM_001167763:-83    | Ifi122        | DIVERGENT_PROMOTER     | 1.182                                                        | 0.139                          | 3916.26            | 542.41             | 0.164                          | 2491.83            | 407.96             |
| A_68_P24455806  | chr6:53237701-53237745                            | NR_015553:434       | 9430076C15Rik | INSIDE                 | 1.182                                                        | 0.276                          | 2340.23            | 646.81             | 0.327                          | 1748.07            | 570.98             |
| A_68_P21775758  | chr2:157030220-157030264                          | NM_011249:28        | Rbl1          | INSIDE                 | 1.182                                                        | 0.361                          | 1705.55            | 615.45             | 0.427                          | 1282.20            | 546.90             |
| A_68_P20935541  | chr1:192802311-192802355                          | NM_144879:545       | Vash2         | INSIDE                 | 1.182                                                        | 0.523                          | 3295.08            | 1722.84            | 0.618                          | 2306.33            | 1424.86            |
| A_68_P32114751  | chr19:41450414-41450458                           | NM_031376:9124      | Pik3ap1       | INSIDE                 | 1.181                                                        | 2.139                          | 637.12             | 1362.57            | 2.525                          | 608.22             | 1535.99            |
| A_68_P31097729  | chr17:24642452-24642496                           | NM_027937:16747     | Caskin1       | INSIDE                 | 1.181                                                        | 1.642                          | 943.39             | 1549.19            | 1.940                          | 726.47             | 1409.40            |
| A_68_P30595154  | chr16:21926561-21926606                           | NM_172821:34542     | Map3k13       | INSIDE                 | 1.181                                                        | 2.902                          | 202.96             | 588.94             | 3.428                          | 154.65             | 530.12             |
| A_68_P28914773  | chr13:30075688-30075732                           | NM_010093:2222      | E2f3          | INSIDE                 | 1.181                                                        | 0.201                          | 2545.78            | 512.77             | 0.238                          | 2063.17            | 490.93             |
| A_68_P28554953  | chr12:77707492-77707536                           | NM_013675:104020    | Spnb1         | INSIDE                 | 1.181                                                        | 2.161                          | 249.69             | 539.53             | 2.552                          | 250.48             | 639.31             |
| A_68_P26824823  | chr9:110532457-110532506                          | NM_183276:24184     | Nbeal2        | INSIDE                 | 1.181                                                        | 1.881                          | 375.94             | 707.05             | 2.222                          | 307.79             | 683.88             |
| A_68_P22889891  | chr4:46663047-46663091                            | NM_198664:3         | Tbcd12        | INSIDE                 | 1.181                                                        | 0.377                          | 2237.25            | 844.28             | 0.446                          | 1678.11            | 748.16             |
| A_68_P22310619  | chr3:87710732-87710776                            | NM_008231:512       | Hdgf          | INSIDE                 | 1.181                                                        | 1.631                          | 1567.60            | 2556.00            | 1.926                          | 1257.82            | 2422.36            |
| A_68_P21736750  | chr2:149656913-149656958                          | NM_001085521:417    | Tmem90b       | INSIDE                 | 1.181                                                        | 0.267                          | 2198.39            | 585.93             | 0.315                          | 1868.05            | 587.98             |
| A_68_P31092363  | chr17:23694927-23694971                           | NM_001033496:6245   | Zfp213        | INSIDE                 | 1.180                                                        | 1.819                          | 1228.78            | 2234.71            | 2.146                          | 909.88             | 1952.25            |
| A_68_P28185375  | chr11:120434093-120434137                         | NM_011032:136       | P4hb          | INSIDE                 | 1.180                                                        | 0.350                          | 1498.47            | 523.87             | 0.413                          | 1027.12            | 423.77             |
| A_68_P28102659  | chr11:106473733-106473777                         | NM_198292:490       | Tex2          | INSIDE                 | 1.180                                                        | 0.186                          | 4562.11            | 850.70             | 0.220                          | 2792.82            | 614.49             |
| A_68_P27865441  | chr11:64249280-64249324                           | NM_178870:469       | Hs3st3a1      | INSIDE                 | 1.180                                                        | 0.516                          | 1281.93            | 661.39             | 0.609                          | 1083.91            | 659.67             |
| A_68_P26238528  | chr8:125736269-125736313                          | NM_145606:398       | Chmp1a        | INSIDE                 | 1.180                                                        | 0.370                          | 2564.67            | 947.81             | 0.436                          | 1700.72            | 741.47             |
| A_68_P23998981  | chr5:114037991-114038035                          | NM_177292:118546    | Wscd2         | INSIDE                 | 1.180                                                        | 2.143                          | 1598.94            | 3427.07            | 2.530                          | 1289.76            | 3262.99            |
| A_68_P23223139  | chr4:114730373-114730417                          | NM_011527:-1737     | Tal1          | PROMOTER               | 1.180                                                        | 0.414                          | 1361.93            | 564.14             | 0.489                          | 1103.14            | 539.17             |
| A_68_P20429508  | chr1:91351074-91351118                            | NM_001037136:-289   | Agap1         | PROMOTER               | 1.180                                                        | 0.465                          | 1159.28            | 539.24             | 0.549                          | 922.00             | 506.01             |
| A_68_P33015612  | chr1_random:49603-49647                           | NM_026866:135714    | Disp1         | INSIDE                 | 1.179                                                        | 1.968                          | 1345.66            | 2648.54            | 2.321                          | 1046.09            | 2428.27            |
| A_68_P32465794  | chrX:71212588-71212632                            | NM_008224:-956      | Hcf1          | PROMOTER               | 1.179                                                        | 1.473                          | 762.22             | 1122.71            | 1.736                          | 1032.39            | 1792.71            |
| A_68_P31675568  | chr18:46357840-46357884                           | NM_001170855:610    | Trim36        | INSIDE                 | 1.179                                                        | 3.438                          | 627.58             | 2157.72            | 4.055                          | 527.62             | 2139.40            |
| A_68_P31629950  | chr18:37927496-37927540                           | NM_033595:2285      | Pcdhga12      | INSIDE                 | 1.179                                                        | 2.288                          | 528.09             | 1208.40            | 2.697                          | 440.85             | 1189.10            |
| A_68_P29338085  | chr13:113784265-113784309                         | NM_001037914:211    | Gm6320        | INSIDE                 | 1.179                                                        | 0.396                          | 1288.22            | 510.14             | 0.467                          | 1078.82            | 503.49             |
| A_68_P24112568  | chr5:134790208-134790252                          | NM_001080746:386    | Gtf2i         | INSIDE                 | 1.179                                                        | 0.381                          | 2706.59            | 1032.45            | 0.450                          | 2015.01            | 906.05             |
| A_68_P23336931  | chr4:136501821-136501865                          | NM_007939:10889     | Epha8         | INSIDE                 | 1.179                                                        | 1.861                          | 1219.06            | 2268.71            | 2.194                          | 968.48             | 2125.29            |
| A_68_P31095629  | chr17:24278798-24278842                           | NM_011062:-259      | Pdpk1         | PROMOTER               | 1.178                                                        | 1.715                          | 1449.97            | 2486.99            | 2.020                          | 1135.52            | 2293.57            |
| A_68_P28724519  | chr12:109154477-109154521                         | NM_001079883:87126  | Bcl11b        | INSIDE                 | 1.178                                                        | 2.828                          | 3017.68            | 8534.54            | 3.330                          | 2220.17            | 7394.25            |
| A_68_P27900565  | chr11:70223680-70223724                           | NM_029231:-169      | Pelp1         | PROMOTER               | 1.178                                                        | 0.322                          | 3385.85            | 1091.77            | 0.380                          | 2736.24            | 1038.93            |
| A_68_P25954495  | chr8:73376456-73376500                            | NM_032397:4429      | Kcnn1         | INSIDE                 | 1.178                                                        | 2.658                          | 511.63             | 1359.84            | 3.131                          | 449.64             | 1407.79            |

| ProbeName      | Target position of probe on CpG island microarray | TargetID                 | GeneSymbol    | CpG island Description | Ratio of relative methylation (TiO <sub>2</sub> -NP/Vehicle) | Sham group                     |                    |                    | TiO <sub>2</sub> -H group      |                    |                    |
|----------------|---------------------------------------------------|--------------------------|---------------|------------------------|--------------------------------------------------------------|--------------------------------|--------------------|--------------------|--------------------------------|--------------------|--------------------|
|                |                                                   |                          |               |                        |                                                              | Relative methylation (Cy5/Cy3) | Cy3 signal (Input) | Cy5 signal (MeDIP) | Relative methylation (Cy5/Cy3) | Cy3 signal (Input) | Cy5 signal (MeDIP) |
| A_68_P29863558 | chr14:103469714-103469758                         | NM_001033242:304         | Chn5          | INSIDE                 | 1.177                                                        | 0.321                          | 1775.36            | 570.25             | 0.378                          | 1325.51            | 501.18             |
| A_68_P27633575 | chr11:20730716-20730761                           | NM_173752:373            | 1110067D22Rik | INSIDE                 | 1.177                                                        | 1.791                          | 1004.39            | 1799.21            | 2.109                          | 789.28             | 1664.30            |
| A_68_P25959799 | chr8:74659667-74659711                            | NM_001001491:498         | Tpm4          | INSIDE                 | 1.177                                                        | 0.512                          | 1654.34            | 846.28             | 0.602                          | 1172.25            | 705.80             |
| A_68_P25095112 | chr7:53050502-53050546                            | NM_001005511:11208       | Lmtk3         | INSIDE                 | 1.177                                                        | 2.665                          | 1098.83            | 2928.83            | 3.136                          | 962.31             | 3018.24            |
| A_68_P24994777 | chr7:20282272-20282316                            | NM_009696:2221           | Apoc          | INSIDE                 | 1.177                                                        | 1.671                          | 772.80             | 1291.16            | 1.967                          | 617.23             | 1214.12            |
| A_68_P24643141 | chr6:92041701-92041746                            | NM_011630:312            | Nr2c2         | INSIDE                 | 1.177                                                        | 2.293                          | 494.81             | 1134.54            | 2.699                          | 425.57             | 1148.65            |
| A_68_P22859195 | chr4:40800489-40800533                            | NM_022305:521            | B4gal1        | INSIDE                 | 1.177                                                        | 1.591                          | 683.01             | 1086.38            | 1.873                          | 659.43             | 1234.89            |
| A_68_P21763873 | chr2:154899789-154899833                          | NM_016661:423            | Ahecy         | INSIDE                 | 1.177                                                        | 0.421                          | 1122.53            | 472.64             | 0.496                          | 920.22             | 456.21             |
| A_68_P20056645 | chr1:16655542-16655586                            | NM_026392:293            | Tmem70        | INSIDE                 | 1.177                                                        | 0.435                          | 1285.38            | 558.56             | 0.511                          | 1202.71            | 614.96             |
| A_68_P31162042 | chr17:36117354-36117398                           | NM_008136:477            | Gnl1          | INSIDE                 | 1.176                                                        | 0.564                          | 4675.50            | 2635.21            | 0.663                          | 3306.06            | 2191.82            |
| A_68_P31058439 | chr17:14340006-14340050                           | NM_172826:810            | Dact2         | INSIDE                 | 1.176                                                        | 0.493                          | 1371.99            | 677.03             | 0.581                          | 1281.60            | 744.03             |
| A_68_P28875776 | chr13:22098904-22098948                           | NM_019429:2684           | Prss16        | INSIDE                 | 1.176                                                        | 2.814                          | 2548.17            | 7169.65            | 3.308                          | 1915.86            | 6337.90            |
| A_68_P27845442 | chr11:60727111-60727155                           | NM_025294:162            | Gm16515       | INSIDE                 | 1.176                                                        | 0.447                          | 1827.23            | 817.65             | 0.526                          | 1402.50            | 738.35             |
| A_68_P27541867 | chr10:127962642-127962686                         | NM_011843:251            | Eys1t         | INSIDE                 | 1.176                                                        | 0.308                          | 1949.43            | 600.46             | 0.362                          | 1388.71            | 503.04             |
| A_68_P26546363 | chr9:58049670-58049721                            | NM_001161540:-89         | Isr2          | PROMOTER               | 1.176                                                        | 0.331                          | 3107.29            | 1028.86            | 0.389                          | 2118.30            | 824.77             |
| A_68_P25365013 | chr7:107128942-107128986                          | NM_175388:4              | Rnfl69        | INSIDE                 | 1.176                                                        | 0.460                          | 1458.57            | 670.25             | 0.541                          | 1136.87            | 614.49             |
| A_68_P24658381 | chr6:94649584-94649628                            | NM_008377:533            | Lrig1         | INSIDE                 | 1.176                                                        | 0.507                          | 2534.01            | 1285.16            | 0.596                          | 2050.01            | 1222.35            |
| A_68_P23720370 | chr5:58111147-58111191                            | NM_018764:1909           | Pcdh7         | INSIDE                 | 1.176                                                        | 0.171                          | 4374.70            | 746.19             | 0.201                          | 3275.31            | 656.79             |
| A_68_P23513994 | chr5:18733193-18733237                            | NM_001170746:351         | Magi2         | INSIDE                 | 1.176                                                        | 1.587                          | 878.05             | 1393.26            | 1.866                          | 719.58             | 1342.45            |
| A_68_P23272068 | chr4:124762857-124762901                          | NM_027310:488            | Meaf6         | INSIDE                 | 1.176                                                        | 0.169                          | 2940.21            | 497.08             | 0.199                          | 2039.83            | 405.54             |
| A_68_P21438060 | chr2:93796133-93796185                            | NM_001145034:1099        | Gm13889       | INSIDE                 | 1.176                                                        | 0.331                          | 1500.77            | 496.74             | 0.389                          | 1030.10            | 401.01             |
| A_68_P20441530 | chr1:93195184-93195228                            | NM_016717:292            | Scly          | INSIDE                 | 1.176                                                        | 0.217                          | 3070.54            | 665.94             | 0.255                          | 2379.22            | 606.73             |
| A_68_P30359768 | chr15:78240674-78240718                           | NM_138670:3163           | Mpst          | INSIDE                 | 1.175                                                        | 0.441                          | 2424.32            | 1069.69            | 0.518                          | 1628.45            | 843.98             |
| A_68_P21566331 | chr2:118640254-118640305                          | NM_026412:541            | D2ErtD750c    | INSIDE                 | 1.175                                                        | 2.571                          | 276.35             | 710.53             | 3.021                          | 245.92             | 742.82             |
| A_68_P21092313 | chr2:28496774-28496818                            | NM_022887:34             | Tsc1          | INSIDE                 | 1.175                                                        | 0.403                          | 1852.04            | 747.25             | 0.474                          | 1437.41            | 681.25             |
| A_68_P32488666 | chrX:78316434-78316478                            | NM_138751:474            | Tmem47        | INSIDE                 | 1.174                                                        | 0.480                          | 1419.11            | 681.42             | 0.564                          | 1852.35            | 1044.34            |
| A_68_P30364009 | chr15:78873840-78873884                           | NM_015738:1548           | Galr3         | INSIDE                 | 1.174                                                        | 0.240                          | 2535.61            | 609.08             | 0.282                          | 1777.92            | 501.26             |
| A_68_P28950723 | chr13:36818496-36818540                           | NM_153529:7805           | Nrml          | INSIDE                 | 1.174                                                        | 0.297                          | 1614.11            | 479.50             | 0.349                          | 1100.22            | 383.86             |
| A_68_P28039686 | chr1:195446719-95446763                           | NM_033217:2272           | Ngfr          | INSIDE                 | 1.174                                                        | 0.369                          | 1745.23            | 643.59             | 0.433                          | 1343.04            | 581.38             |
| A_68_P25693344 | chr8:17535329-17535373                            | NM_053171:35             | Csmd1         | INSIDE                 | 1.174                                                        | 0.446                          | 3792.04            | 1692.68            | 0.524                          | 2909.46            | 1524.71            |
| A_68_P25098820 | chr7:53652793-53652837                            | NM_001112739-948         | Kcnc1         | INSIDE                 | 1.174                                                        | 0.390                          | 2470.19            | 964.58             | 0.458                          | 1671.21            | 765.95             |
| A_68_P24377897 | chr6:38501394-38501438                            | NM_001170849:-27         | Luc7l2        | PROMOTER               | 1.174                                                        | 0.266                          | 2860.98            | 761.77             | 0.313                          | 2343.13            | 732.64             |
| A_68_P21765246 | chr2:155207391-155207435                          | NM_178111:-179           | Tp53inp2      | PROMOTER               | 1.174                                                        | 0.162                          | 3642.40            | 591.34             | 0.191                          | 2857.35            | 544.52             |
| A_68_P21151182 | chr2:38781242-38781286                            | NM_010264:717            | Nr6a1         | INSIDE                 | 1.174                                                        | 0.331                          | 2401.57            | 796.10             | 0.389                          | 1741.43            | 677.48             |
| A_68_P20774313 | chr1:163806678-163806722                          | NM_172645:92             | Al848100      | INSIDE                 | 1.174                                                        | 0.232                          | 4092.85            | 947.70             | 0.272                          | 3038.27            | 825.71             |
| A_68_P30575358 | chr16:17722742-17722786                           | NM_001040683:259         | Med15         | INSIDE                 | 1.173                                                        | 0.191                          | 2350.93            | 448.70             | 0.224                          | 1815.81            | 406.61             |
| A_68_P30544452 | chr16:10784908-10784952                           | NM_009896:699            | Socs1         | INSIDE                 | 1.173                                                        | 0.140                          | 5609.63            | 783.46             | 0.164                          | 3988.39            | 653.64             |
| A_68_P26373432 | chr9:26807056-26807100                            | NM_025862:56             | Acad8         | INSIDE                 | 1.173                                                        | 0.348                          | 2805.54            | 977.12             | 0.409                          | 1841.97            | 752.46             |
| A_68_P26319145 | chr9:14556214-14556258                            | NM_010242:330            | Fut4          | INSIDE                 | 1.173                                                        | 0.378                          | 1235.79            | 467.67             | 0.444                          | 1029.49            | 457.18             |
| A_68_P25843138 | chr8:48798881-48798925                            | NM_172407:383            | Cdkn2aip      | INSIDE                 | 1.173                                                        | 0.444                          | 1219.79            | 540.98             | 0.520                          | 979.56             | 509.46             |
| A_68_P31369877 | chr17:78600790-78600834                           | NM_015800:1225           | Crim1         | INSIDE                 | 1.172                                                        | 0.270                          | 1791.05            | 483.34             | 0.316                          | 1266.09            | 400.41             |
| A_68_P26458702 | chr9:42753013-42753057                            | NM_175481:-580           | Grik4         | PROMOTER               | 1.172                                                        | 0.427                          | 1199.32            | 511.91             | 0.500                          | 929.93             | 465.22             |
| A_68_P24950807 | chr7:4796189-4796233                              | NM_172737:88             | Shisa7        | INSIDE                 | 1.172                                                        | 0.175                          | 3580.32            | 626.50             | 0.205                          | 2493.63            | 511.34             |
| A_68_P22829976 | chr4:34136877-34136921                            | NM_026293:144            | Spaca1        | INSIDE                 | 1.172                                                        | 2.150                          | 355.16             | 763.62             | 2.520                          | 305.89             | 770.97             |
| A_68_P22503483 | chr3:126300156-126300200                          | NM_001025438:288         | Camk2d        | INSIDE                 | 1.172                                                        | 1.654                          | 1107.25            | 1831.65            | 1.940                          | 952.94             | 1848.30            |
| A_68_P31708189 | chr18:52688590-52688634                           | NM_010728:750            | Lox           | INSIDE                 | 1.171                                                        | 1.974                          | 1149.46            | 2268.69            | 2.311                          | 984.80             | 2275.50            |
| A_68_P30600196 | chr16:22858132-22858176                           | NM_001190804:237         | Dnajb11       | INSIDE                 | 1.171                                                        | 0.375                          | 1693.38            | 635.09             | 0.439                          | 1244.18            | 546.57             |
| A_68_P28670941 | chr12:99812671-99812719                           | NM_029911:3456           | Kcnk10        | INSIDE                 | 1.171                                                        | 2.551                          | 803.82             | 2050.63            | 2.988                          | 690.18             | 2062.35            |
| A_68_P23991346 | chr5:112737009-112737053                          | NM_009419:31304          | Tp52          | INSIDE                 | 1.171                                                        | 1.795                          | 2388.15            | 4287.34            | 2.103                          | 1855.04            | 3900.57            |
| A_68_P23962030 | chr5:106990411-106990455                          | ENSMUST00000131029:13302 |               | INSIDE                 | 1.171                                                        | 0.266                          | 2433.69            | 647.97             | 0.312                          | 1910.01            | 595.68             |
| A_68_P23134366 | chr4:97445300-97445344                            | NM_001122953:1006        | Nfia          | INSIDE                 | 1.171                                                        | 3.275                          | 699.35             | 2290.60            | 3.835                          | 521.40             | 1999.69            |
| A_68_P31936611 | chr19:6984134-6984178                             | NM_012021:-21            | Prdx5         | DIVERGENT_PROMOTER     | 1.170                                                        | 0.430                          | 1720.57            | 739.11             | 0.503                          | 1476.95            | 742.42             |
| A_68_P27865440 | chr1:164249134-64249178                           | NM_178870:323            | Hs3st3a1      | INSIDE                 | 1.170                                                        | 0.372                          | 2386.05            | 887.45             | 0.435                          | 1883.30            | 819.60             |
| A_68_P27845571 | chr11:60745673-60745717                           | NM_008928:136            | Map2k3        | INSIDE                 | 1.170                                                        | 0.431                          | 2184.95            | 941.37             | 0.504                          | 1695.82            | 854.53             |
| A_68_P26845894 | chr9:114598017-114598061                          | NM_146229:90             | Dync1li1      | INSIDE                 | 1.170                                                        | 0.443                          | 1103.18            | 488.43             | 0.518                          | 988.49             | 512.12             |
| A_68_P25352336 | chr7:104937141-104937185                          | ENSMUST00000172423:112   |               | INSIDE                 | 1.170                                                        | 0.273                          | 3048.70            | 832.76             | 0.149                          | 2394.93            | 765.14             |
| A_68_P23698174 | chr5:53440423-53440467                            | NM_011402:-147           | Slc34a2       | PROMOTER               | 1.170                                                        | 0.252                          | 2145.45            | 540.49             | 0.295                          | 1615.04            | 475.88             |
| A_68_P23252506 | chr4:120339576-120339620                          | NM_019563:431            | Cited4        | INSIDE                 | 1.170                                                        | 0.477                          | 1253.44            | 597.86             | 0.558                          | 1017.65            | 567.76             |
| A_68_P31927963 | chr19:5306888-5306932                             | NM_001024717:8580        | Gal3st3       | INSIDE                 | 1.169                                                        | 1.743                          | 1710.94            | 2981.81            | 2.037                          | 1292.63            | 2632.72            |
| A_68_P28036776 | chr11:94982434-94982478                           | NM_010055:1026           | Dlx3          | INSIDE                 | 1.169                                                        | 2.488                          | 2918.87            | 7262.24            | 2.910                          | 2040.20            | 5936.45            |
| A_68_P27995155 | chr11:87431487-87431532                           | NM_001045527:844         | Hsf5          | INSIDE                 | 1.169                                                        | 2.349                          | 381.64             | 896.29             | 2.746                          | 253.68             | 696.68             |
| A_68_P27765618 | chr11:45869772-45869816                           | NM_009616:306            | Adam19        | INSIDE                 | 1.169                                                        | 0.310                          | 2272.22            | 704.70             | 0.362                          | 1806.30            | 654.75             |
| A_68_P27551032 | chr11:3166258-3166302                             | NM_007879:109            | Drp1          | INSIDE                 | 1.169                                                        | 0.144                          | 3582.63            | 514.95             | 0.168                          | 2753.98            | 462.62             |
| A_68_P26885085 | chr9:121628083-121628127                          | NM_010918:-194           | Nktr          | PROMOTER               | 1.169                                                        | 0.447                          | 1608.10            | 718.94             | 0.523                          | 1089.46            | 569.44             |
| A_68_P26346746 | chr9:21172514-21172558                            | NM_001042708:90          | Ilb3          | INSIDE                 | 1.169                                                        | 0.265                          | 2090.22            | 554.34             | 0.310                          | 1424.78            | 441.62             |

| ProbeName      | Target position of probe on CpG island microarray | TargetID                | GeneSymbol    | CpG island Description | Ratio of relative methylation (TiO <sub>2</sub> -NP/Vehicle) | Sham group                     |                    |                    | TiO <sub>2</sub> -H group      |                    |                    |
|----------------|---------------------------------------------------|-------------------------|---------------|------------------------|--------------------------------------------------------------|--------------------------------|--------------------|--------------------|--------------------------------|--------------------|--------------------|
|                |                                                   |                         |               |                        |                                                              | Relative methylation (Cy5/Cy3) | Cy3 signal (Input) | Cy5 signal (MeDIP) | Relative methylation (Cy5/Cy3) | Cy3 signal (Input) | Cy5 signal (MeDIP) |
| A_68_P20729268 | chr1:155747036-155747080                          | NM_008131:-16           | Glul          | PROMOTER               | 1.169                                                        | 1.473                          | 1771.46            | 2609.16            | 1.721                          | 1277.58            | 2199.34            |
| A_68_P29613141 | chr14:55203509-55203559                           | NM_028890:21211         | 4931414P19Rik | INSIDE                 | 1.168                                                        | 1.986                          | 635.81             | 1262.81            | 2.320                          | 543.37             | 1260.45            |
| A_68_P28076812 | chr11:101846260-101846304                         | NM_028207:-177          | Dusp3         | DIVERGENT_PROMOTER     | 1.168                                                        | 0.411                          | 1305.52            | 536.49             | 0.480                          | 1080.01            | 518.38             |
| A_68_P27806465 | chr11:53583822-53583866                           | NM_001159396:-130       | Irf1          | PROMOTER               | 1.168                                                        | 1.410                          | 1186.66            | 1673.78            | 1.648                          | 927.87             | 1529.21            |
| A_68_P27288652 | chr10:80755895-80755939                           | NM_001146687:200        | Pip5k1c       | INSIDE                 | 1.168                                                        | 0.235                          | 3144.58            | 739.80             | 0.275                          | 2340.09            | 642.95             |
| A_68_P27267070 | chr10:76728491-76728535                           | NM_030262:6468          | Pofut2        | INSIDE                 | 1.168                                                        | 1.931                          | 1300.39            | 2510.79            | 2.255                          | 992.32             | 2237.95            |
| A_68_P26630975 | chr9:72892792-72892836                            | NM_023635:143           | Rab27a        | INSIDE                 | 1.168                                                        | 0.440                          | 2420.41            | 1064.42            | 0.514                          | 1735.76            | 891.75             |
| A_68_P26038379 | chr8:90486004-90486048                            | NM_033327:-2532         | Zfp423        | PROMOTER               | 1.168                                                        | 0.182                          | 2519.84            | 457.57             | 0.212                          | 1726.89            | 366.34             |
| A_68_P24880090 | chr6:137684038-137684082                          | NM_011499:458           | Strap         | INSIDE                 | 1.168                                                        | 0.231                          | 2185.12            | 503.87             | 0.269                          | 1629.31            | 438.91             |
| A_68_P23577159 | chr5:31522755-31522799                            | NM_008014:142           | Ppm1g         | INSIDE                 | 1.168                                                        | 0.507                          | 1636.63            | 830.54             | 0.593                          | 1293.12            | 766.49             |
| A_68_P21018168 | chr2:13714756-13714800                            | NM_145838:369           | Sts1a6        | INSIDE                 | 1.168                                                        | 0.270                          | 2808.60            | 759.17             | 0.316                          | 2014.32            | 636.07             |
| A_68_P32008255 | chr19:21867281-21867325                           | NM_001033759:14471      | Tmem2         | INSIDE                 | 1.167                                                        | 2.606                          | 1502.12            | 3914.51            | 3.042                          | 1134.07            | 3450.19            |
| A_68_P31156943 | chr17:35138141-35138185                           | NM_011690:311           | Vars          | INSIDE                 | 1.167                                                        | 2.313                          | 409.66             | 947.74             | 2.699                          | 341.88             | 922.72             |
| A_68_P30586702 | chr16:20241285-20241329                           | NM_198599:125           | Map6d1        | INSIDE                 | 1.167                                                        | 1.647                          | 733.83             | 1208.91            | 1.922                          | 617.80             | 1187.32            |
| A_68_P28158071 | chr11:116083426-116083470                         | NM_025276:15957         | Evpl          | INSIDE                 | 1.167                                                        | 1.812                          | 726.83             | 1317.15            | 2.114                          | 646.83             | 1367.45            |
| A_68_P27690051 | chr11:32543056-32543100                           | NM_134015:204           | Fbxw11        | INSIDE                 | 1.167                                                        | 0.475                          | 1336.53            | 634.38             | 0.554                          | 1101.65            | 610.03             |
| A_68_P26804351 | chr9:106550055-106550099                          | NM_001160353:8364       | Grm2          | INSIDE                 | 1.167                                                        | 1.772                          | 811.87             | 1438.53            | 2.068                          | 676.12             | 1398.03            |
| A_68_P25581957 | chr7:147235055-147235099                          | NM_010836:-89           | Msx3          | PROMOTER               | 1.167                                                        | 0.214                          | 2621.77            | 560.82             | 0.250                          | 1876.61            | 468.28             |
| A_68_P24046036 | chr5:122161287-122161331                          | NM_009125:-309          | Atxn2         | PROMOTER               | 1.167                                                        | 0.305                          | 2562.67            | 781.29             | 0.356                          | 2038.64            | 725.30             |
| A_68_P20354530 | chr1:75500243-75500287                            | NM_178884:2763          | Obsl1         | INSIDE                 | 1.167                                                        | 2.027                          | 1592.96            | 3229.46            | 2.365                          | 1352.15            | 3198.39            |
| A_68_P20348297 | chr1:74438060-74438104                            | NM_153088:-100          | Ctdsp1        | PROMOTER               | 1.167                                                        | 0.570                          | 2242.53            | 1279.04            | 0.666                          | 1882.33            | 1252.94            |
| A_68_P31678447 | chr18:46887518-46887562                           | NM_033037:456           | Cdo1          | INSIDE                 | 1.166                                                        | 0.094                          | 5396.74            | 505.43             | 0.109                          | 3705.51            | 404.76             |
| A_68_P30422457 | chr15:88813275-88813319                           | NM_031260:-127          | Mov10l1       | DIVERGENT_PROMOTER     | 1.166                                                        | 2.150                          | 582.23             | 1252.02            | 2.507                          | 445.59             | 1117.12            |
| A_68_P28752832 | chr12:114067540-114067584                         | NM_028023:38            | Cdea4         | INSIDE                 | 1.166                                                        | 0.236                          | 3500.60            | 825.63             | 0.275                          | 2620.41            | 720.42             |
| A_68_P28685876 | chr12:102321244-102321288                         | NR_038047:606           | DI30020L05Rik | INSIDE                 | 1.166                                                        | 1.406                          | 1010.75            | 1420.87            | 1.639                          | 884.53             | 1449.63            |
| A_68_P28183243 | chr11:120097692-120097736                         | NM_198423:3454          | Bahce1        | INSIDE                 | 1.166                                                        | 0.418                          | 2180.80            | 911.18             | 0.487                          | 1659.71            | 808.82             |
| A_68_P27927425 | chr11:75469530-75469574                           | NM_001080775:36         | Myo1c         | INSIDE                 | 1.166                                                        | 2.012                          | 483.41             | 972.40             | 2.345                          | 410.78             | 963.28             |
| A_68_P27894313 | chr11:69137244-69137288                           | NM_172560:109           | Cntrob        | INSIDE                 | 1.166                                                        | 0.125                          | 4432.25            | 554.54             | 0.146                          | 3100.72            | 452.34             |
| A_68_P27839286 | chr11:59653097-59653142                           | NM_011991:150           | Cops3         | INSIDE                 | 1.166                                                        | 0.478                          | 1737.74            | 831.48             | 0.558                          | 1410.51            | 787.13             |
| A_68_P25528910 | chr7:138687411-138687455                          | NM_008257:956           | Hmx3          | INSIDE                 | 1.166                                                        | 0.263                          | 2612.44            | 686.66             | 0.306                          | 1882.30            | 576.73             |
| A_68_P24326758 | chr6:29423877-29423921                            | NM_001145360:2462       | Gm9047        | DOWNSTREAM             | 1.166                                                        | 0.354                          | 1476.53            | 523.42             | 0.413                          | 1059.62            | 437.81             |
| A_68_P24117614 | chr5:136210246-136210290                          | NM_008898:45185         | Por           | INSIDE                 | 1.166                                                        | 2.066                          | 1336.15            | 2761.08            | 2.409                          | 1110.32            | 2674.33            |
| A_68_P23440310 | chr4:155113949-155113993                          | NM_001101506:5058       | Gm5151        | INSIDE                 | 1.166                                                        | 1.525                          | 746.06             | 1137.56            | 1.778                          | 653.20             | 1161.53            |
| A_68_P21070791 | chr2:25096537-25096581                            | NM_026415:-1141         | 2310002J15Rik | DIVERGENT_PROMOTER     | 1.166                                                        | 0.321                          | 1903.91            | 611.89             | 0.375                          | 1469.45            | 550.63             |
| A_68_P30456841 | chr15:95059370-95059414                           | NM_016743:299745        | Nell2         | INSIDE                 | 1.165                                                        | 1.995                          | 422.91             | 843.53             | 2.324                          | 315.28             | 732.69             |
| A_68_P28998905 | chr13:44998485-44998530                           | NM_001205043:171868     | Jarid2        | INSIDE                 | 1.165                                                        | 1.632                          | 660.14             | 1077.64            | 1.901                          | 485.27             | 922.67             |
| A_68_P26585803 | chr9:64949765-64949813                            | NM_020043:487           | Igdcc4        | INSIDE                 | 1.165                                                        | 0.492                          | 2762.05            | 1359.87            | 0.574                          | 1974.35            | 1132.86            |
| A_68_P26546339 | chr9:58046840-58046884                            | NM_001161535:2660       | Islr2         | INSIDE                 | 1.165                                                        | 0.377                          | 2541.89            | 958.29             | 0.439                          | 1656.28            | 727.22             |
| A_68_P25958199 | chr8:74194916-74194960                            | NM_001029873:718        | Unc13a        | INSIDE                 | 1.165                                                        | 0.218                          | 2944.37            | 642.98             | 0.254                          | 1885.63            | 479.84             |
| A_68_P25505712 | chr7:134615346-134615390                          | NM_145589:241           | Prr14         | INSIDE                 | 1.165                                                        | 0.324                          | 1883.25            | 610.90             | 0.378                          | 1517.05            | 573.53             |
| A_68_P21745018 | chr2:151457749-151457793                          | NM_198214:499           | Snph          | INSIDE                 | 1.165                                                        | 0.299                          | 1740.58            | 520.89             | 0.349                          | 1362.15            | 475.02             |
| A_68_P21132485 | chr2:35111777-35111821                            | NM_001206367:-80        | Gsn           | PROMOTER               | 1.165                                                        | 0.238                          | 1838.97            | 438.17             | 0.278                          | 1288.69            | 357.70             |
| A_68_P20023664 | chr1:9690196-9690240                              | NM_008651:72            | Mybl1         | INSIDE                 | 1.165                                                        | 8.541                          | 1038.71            | 8871.47            | 9.949                          | 808.97             | 8048.80            |
| A_68_P32795515 | chrX:160347015-160347059                          | NM_026887:-55           | Ap1s2         | PROMOTER               | 1.164                                                        | 1.676                          | 830.92             | 1392.22            | 1.951                          | 1117.86            | 2180.85            |
| A_68_P31156856 | chr17:35115532-35115587                           | NM_013558:5912          | Hspa11        | INSIDE                 | 1.164                                                        | 1.757                          | 2299.51            | 4040.45            | 2.045                          | 1716.35            | 3509.95            |
| A_68_P30931896 | chr16:85900309-85900353                           | NM_011782:1040          | Adamts5       | INSIDE                 | 1.164                                                        | 0.430                          | 1594.61            | 685.33             | 0.500                          | 1296.59            | 648.72             |
| A_68_P29152749 | chr13:76193665-76193709                           | NM_175495:758           | Gpr150        | INSIDE                 | 1.164                                                        | 1.457                          | 1386.67            | 2020.45            | 1.696                          | 1011.54            | 1715.14            |
| A_68_P28003255 | chr11:88860965-88861009                           | NM_009546:270           | Trim25        | INSIDE                 | 1.164                                                        | 0.383                          | 1799.46            | 689.08             | 0.446                          | 1289.83            | 574.90             |
| A_68_P26017561 | chr8:86525454-86525498                            | NM_183097:-128          | 1700067K01Rik | PROMOTER               | 1.164                                                        | 1.543                          | 833.04             | 1285.48            | 1.796                          | 674.63             | 1211.94            |
| A_68_P23445682 | chr5:3543936-3543980                              | NM_001042501:126        | Fam133b       | INSIDE                 | 1.164                                                        | 0.321                          | 1818.44            | 584.49             | 0.374                          | 1251.82            | 468.32             |
| A_68_P23363726 | chr4:140938216-140938260                          | NM_001085513:14104      | Fam131c       | INSIDE                 | 1.164                                                        | 1.555                          | 648.18             | 1007.87            | 1.810                          | 542.93             | 982.76             |
| A_68_P23355295 | chr4:136249748-136249792                          | NM_010142:142080        | Ephb2         | INSIDE                 | 1.164                                                        | 1.683                          | 1638.15            | 2756.33            | 1.959                          | 1128.47            | 2210.88            |
| A_68_P32543771 | chrX:93291182-93291226                            | NM_010833:-179          | Msn           | PROMOTER               | 1.163                                                        | 1.365                          | 1453.78            | 1983.78            | 1.587                          | 2171.29            | 3445.62            |
| A_68_P31502464 | chr18:12899809-12899853                           | NM_001042418:-33        | Cabyr         | PROMOTER               | 1.163                                                        | 0.318                          | 2017.19            | 642.29             | 0.370                          | 1341.16            | 496.43             |
| A_68_P31097726 | chr17:24642065-24642109                           | NM_027937:16359         | Caskin1       | INSIDE                 | 1.163                                                        | 1.931                          | 746.44             | 1441.08            | 2.246                          | 548.78             | 1232.68            |
| A_68_P29269917 | chr13:101514369-101514413                         | NM_001190264:224        | Mrps36        | INSIDE                 | 1.163                                                        | 0.385                          | 1700.02            | 653.83             | 0.447                          | 1258.59            | 563.07             |
| A_68_P28731502 | chr12:110271962-110272006                         | NM_001163175:34443      | Begain        | INSIDE                 | 1.163                                                        | 2.318                          | 1259.78            | 2919.60            | 2.696                          | 1081.61            | 2916.30            |
| A_68_P27718622 | chr11:37050106-37050153                           | ENSMUST00000157030:-663 |               | PROMOTER               | 1.163                                                        | 0.155                          | 4391.13            | 682.06             | 0.181                          | 3046.02            | 550.40             |
| A_68_P25050057 | chr7:36369976-36370020                            | NM_145840:603           | Rgs9bp        | INSIDE                 | 1.163                                                        | 2.037                          | 829.25             | 1689.00            | 2.370                          | 664.77             | 1575.27            |
| A_68_P21820014 | chr2:164658302-164658346                          | NM_001038492:-48        | Ctsa          | PROMOTER               | 1.163                                                        | 0.476                          | 1342.64            | 638.44             | 0.553                          | 1042.53            | 576.72             |
| A_68_P31627037 | chr18:37303374-37303418                           | NM_001003672:-226       | Pcdhac2       | INSIDE                 | 1.162                                                        | 0.413                          | 1294.55            | 534.54             | 0.480                          | 1009.22            | 484.13             |
| A_68_P31215625 | chr17:48179041-48179085                           | AK007241:-3819          |               | PROMOTER               | 1.162                                                        | 0.409                          | 2066.06            | 844.93             | 0.475                          | 1592.34            | 756.50             |
| A_68_P29047193 | chr13:54150633-54150677                           | NM_010076:373           | Drd1a         | INSIDE                 | 1.162                                                        | 0.296                          | 2597.85            | 768.22             | 0.344                          | 1986.54            | 682.72             |
| A_68_P28693524 | chr12:103995935-103995979                         | NM_001142939:64         | AK010878      | INSIDE                 | 1.162                                                        | 0.400                          | 1172.38            | 468.67             | 0.465                          | 893.91             | 415.31             |
| A_68_P26643352 | chr9:75161879-75161923                            | NM_138719:-148          | Gnb5          | PROMOTER               | 1.162                                                        | 2.050                          | 2175.74            | 4459.93            | 2.381                          | 1760.22            | 4191.18            |

| ProbeName      | Target position of probe on CpG island microarray | TargetID                 | GeneSymbol    | CpG island Description | Ratio of relative methylation (TiO <sub>2</sub> -NP/Vehicle) | Sham group                     |                    |                    | TiO <sub>2</sub> -H group      |                    |                    |
|----------------|---------------------------------------------------|--------------------------|---------------|------------------------|--------------------------------------------------------------|--------------------------------|--------------------|--------------------|--------------------------------|--------------------|--------------------|
|                |                                                   |                          |               |                        |                                                              | Relative methylation (Cy5/Cy3) | Cy3 signal (Input) | Cy5 signal (MeDIP) | Relative methylation (Cy5/Cy3) | Cy3 signal (Input) | Cy5 signal (MeDIP) |
| A_68_P25368682 | chr7:107756133-107756177                          | NM_001163663:55          | Rab6          | INSIDE                 | 1.162                                                        | 1.380                          | 1083.40            | 1495.18            | 1.603                          | 873.60             | 1400.64            |
| A_68_P25264703 | chr7:87226955-87226999                            | NM_175433:55863          | Zfp710        | INSIDE                 | 1.162                                                        | 2.583                          | 1875.43            | 4844.58            | 3.002                          | 1383.97            | 4154.49            |
| A_68_P24819298 | chr6:125141713-125141757                          | NM_146171:-130           | Ncapd2        | DIVERGENT_PROMOTER     | 1.162                                                        | 0.306                          | 1780.91            | 545.22             | 0.356                          | 1377.72            | 490.17             |
| A_68_P23394410 | chr4:147818444-147818488                          | NM_027873:394            | Ubiad1        | INSIDE                 | 1.162                                                        | 0.545                          | 2219.41            | 1208.58            | 0.633                          | 1802.49            | 1140.33            |
| A_68_P23223134 | chr4:114729741-114729785                          | NM_011527:-2369          | Tal1          | PROMOTER               | 1.162                                                        | 0.444                          | 6051.50            | 2688.19            | 0.516                          | 3719.35            | 1920.39            |
| A_68_P22872581 | chr4:43591992-43592036                            | NM_172692:-278           | Gba2          | PROMOTER               | 1.162                                                        | 0.231                          | 1946.45            | 450.36             | 0.269                          | 1641.39            | 441.45             |
| A_68_P32224194 | chr19:60302569-60302613                           | NM_029648:10             | D19ErtD737c   | INSIDE                 | 1.161                                                        | 1.820                          | 769.30             | 1400.24            | 2.113                          | 617.53             | 1304.84            |
| A_68_P30645474 | chr16:31081440-31081484                           | NM_198626:56             | Al480653      | INSIDE                 | 1.161                                                        | 3.490                          | 992.79             | 3464.80            | 4.053                          | 789.95             | 3201.47            |
| A_68_P30605415 | chr16:23890655-23890699                           | NM_009215:254            | Sst           | INSIDE                 | 1.161                                                        | 1.974                          | 505.45             | 997.62             | 2.292                          | 361.97             | 829.72             |
| A_68_P25470558 | chr7:127974492-127974536                          |                          | Unknown       |                        | 1.161                                                        | 0.359                          | 1785.76            | 641.77             | 0.417                          | 1406.43            | 586.90             |
| A_68_P24034079 | chr5:120131042-120131086                          | NM_011535:10387          | Tbx3          | INSIDE                 | 1.161                                                        | 0.284                          | 2067.27            | 587.47             | 0.330                          | 1488.08            | 491.08             |
| A_68_P32717153 | chrX:140753652-140753696                          | NM_026247:1166           | Alg13         | INSIDE                 | 1.160                                                        | 1.355                          | 2512.50            | 3404.61            | 1.573                          | 3941.41            | 6198.04            |
| A_68_P31980264 | chr19:16511462-16511506                           | NM_008137:1328           | Gna14         | INSIDE                 | 1.160                                                        | 0.425                          | 1114.44            | 473.46             | 0.493                          | 892.24             | 439.82             |
| A_68_P31978254 | chr19:16207846-16207890                           | NM_008139:548            | Gnaq          | INSIDE                 | 1.160                                                        | 0.337                          | 1739.28            | 586.09             | 0.391                          | 1249.19            | 488.47             |
| A_68_P30963823 | chr16:91597831-91597875                           | NM_030018:73             | Tmem50b       | INSIDE                 | 1.160                                                        | 2.078                          | 1442.41            | 2997.19            | 2.410                          | 1137.86            | 2741.80            |
| A_68_P28030167 | chr11:93857753-93857797                           | NM_001199203:370         | Spag9         | INSIDE                 | 1.160                                                        | 1.627                          | 624.83             | 1016.64            | 1.888                          | 539.05             | 1017.71            |
| A_68_P27841324 | chr11:59989338-59989382                           | NM_001037764:35777       | Rai1          | INSIDE                 | 1.160                                                        | 0.414                          | 1229.90            | 509.34             | 0.481                          | 935.26             | 449.44             |
| A_68_P27340038 | chr10:90564802-90564859                           | NM_027078:19047          | Ikbip         | INSIDE                 | 1.160                                                        | 3.020                          | 443.60             | 1339.58            | 3.502                          | 354.33             | 1240.86            |
| A_68_P26345408 | chr9:20896439-20896483                            | NR_038081:-8             | Raver1-fdx11  | PROMOTER               | 1.160                                                        | 0.390                          | 1454.10            | 566.52             | 0.452                          | 1186.90            | 536.34             |
| A_68_P26238593 | chr8:125749038-125749082                          | NM_194444:320            | Cdk10         | INSIDE                 | 1.160                                                        | 0.277                          | 2211.52            | 611.59             | 0.321                          | 1709.17            | 548.31             |
| A_68_P25020923 | chr7:29062778-29062822                            | NM_001177427:76          | Eid2b         | INSIDE                 | 1.160                                                        | 0.395                          | 1227.41            | 484.49             | 0.458                          | 862.31             | 394.84             |
| A_68_P32185226 | chr19:53978356-53978400                           | NM_001168491:538         | Pdc4d         | INSIDE                 | 1.159                                                        | 0.436                          | 1533.71            | 667.97             | 0.505                          | 1237.83            | 624.93             |
| A_68_P31982213 | chr19:16854797-16854841                           | NM_173028:599            | Vps13a        | INSIDE                 | 1.159                                                        | 0.491                          | 2215.43            | 1088.66            | 0.569                          | 1800.91            | 1025.30            |
| A_68_P30392998 | chr15:83998328-83998372                           | NM_054088:105            | Pnp1a3        | INSIDE                 | 1.159                                                        | 0.489                          | 1152.57            | 564.07             | 0.567                          | 1029.65            | 584.25             |
| A_68_P27533591 | chr10:126467810-126467854                         | NM_025537:38             | Tsfm          | INSIDE                 | 1.159                                                        | 0.516                          | 1589.37            | 820.23             | 0.598                          | 1296.21            | 775.39             |
| A_68_P27253670 | chr10:74430232-74430276                           | NM_010311:279            | Gnaz          | INSIDE                 | 1.159                                                        | 1.568                          | 1195.39            | 1874.23            | 1.816                          | 936.72             | 1701.54            |
| A_68_P27215509 | chr10:67504533-67504577                           | NM_001081346:62209       | Rtkn2         | INSIDE                 | 1.159                                                        | 1.745                          | 575.04             | 1003.32            | 2.023                          | 531.14             | 1074.28            |
| A_68_P26221731 | chr8:123191547-123191591                          | NM_010926:444            | Cox4nb        | INSIDE                 | 1.159                                                        | 1.627                          | 778.03             | 1266.17            | 1.886                          | 672.28             | 1267.96            |
| A_68_P25022915 | chr7:29415604-29415648                            | NM_175319:408            | C330005M16Rik | INSIDE                 | 1.159                                                        | 0.552                          | 1534.93            | 846.87             | 0.639                          | 1415.81            | 905.35             |
| A_68_P23328078 | chr4:134908468-134908512                          | NM_001130477:639         | Srrm1         | INSIDE                 | 1.159                                                        | 0.389                          | 1445.43            | 562.23             | 0.451                          | 1151.40            | 519.26             |
| A_68_P32669432 | chrX:130433013-130433072                          | NM_019656:-74            | Tspan6        | DIVERGENT_PROMOTER     | 1.158                                                        | 3.293                          | 149.86             | 493.50             | 3.814                          | 183.41             | 699.48             |
| A_68_P32259782 | chrX:11583929-11583973                            |                          | Unknown       |                        | 1.158                                                        | 0.380                          | 1370.73            | 520.44             | 0.440                          | 1892.15            | 831.68             |
| A_68_P32203280 | chr19:56900735-56900779                           | NM_001002240:-8          | Tdrd1         | PROMOTER               | 1.158                                                        | 2.115                          | 1052.37            | 2225.57            | 2.448                          | 803.98             | 1968.37            |
| A_68_P30476460 | chr15:98620564-98620608                           | NM_021279:299            | Wnt1          | INSIDE                 | 1.158                                                        | 1.550                          | 1242.85            | 1926.75            | 1.795                          | 909.11             | 1632.26            |
| A_68_P24192244 | chr5:151476355-151476399                          | NM_175310:-25            | Pds5b         | DIVERGENT_PROMOTER     | 1.158                                                        | 1.899                          | 2085.53            | 3960.73            | 2.199                          | 1713.12            | 3767.06            |
| A_68_P24137873 | chr5:140302698-140302742                          | NM_025604:77             | Psmg3         | INSIDE                 | 1.158                                                        | 0.353                          | 1474.45            | 520.61             | 0.409                          | 1165.84            | 476.73             |
| A_68_P24044263 | chr5:121835304-121835348                          | NM_001163470:298         | Traf1d1       | INSIDE                 | 1.158                                                        | 0.380                          | 1881.73            | 714.15             | 0.440                          | 1359.98            | 597.86             |
| A_68_P23588840 | chr5:33775538-33775582                            | ENSMUST00000030994:-1716 |               | PROMOTER               | 1.158                                                        | 3.339                          | 956.20             | 3192.98            | 3.867                          | 837.07             | 3236.89            |
| A_68_P21875215 | chr2:174241468-174241512                          | NM_020580:186            | Th1l          | INSIDE                 | 1.158                                                        | 0.287                          | 1571.58            | 451.11             | 0.332                          | 1224.23            | 406.90             |
| A_68_P21628929 | chr2:130109758-130109802                          | NM_130884:407            | Idh3b         | INSIDE                 | 1.158                                                        | 0.485                          | 2909.30            | 1409.60            | 0.561                          | 1944.76            | 1090.70            |
| A_68_P21129653 | chr2:34627681-34627725                            | NM_001163434:93          | Hspa5         | INSIDE                 | 1.158                                                        | 0.215                          | 2472.31            | 532.55             | 0.249                          | 1728.91            | 431.21             |
| A_68_P21116405 | chr2:32470425-32470469                            | NM_001025310:7966        | Stfgalnac6    | INSIDE                 | 1.158                                                        | 2.210                          | 1442.03            | 3186.25            | 2.559                          | 1029.46            | 2634.80            |
| A_68_P31123428 | chr17:28758772-28758816                           | NM_016795:605            | Strp1         | INSIDE                 | 1.157                                                        | 0.458                          | 2088.59            | 956.97             | 0.530                          | 1569.62            | 831.94             |
| A_68_P27809328 | chr11:54117787-54117831                           | NM_001033597:103         | Acs16         | INSIDE                 | 1.157                                                        | 0.344                          | 2212.45            | 761.16             | 0.398                          | 1731.62            | 689.16             |
| A_68_P24994775 | chr7:20282050-20282094                            | NM_009696:2443           | Apoe          | INSIDE                 | 1.157                                                        | 2.291                          | 1157.48            | 2651.44            | 2.651                          | 959.80             | 2544.35            |
| A_68_P23547921 | chr5:25035545-25035589                            | NR_027388:-269           | 1700096K18Rik | PROMOTER               | 1.157                                                        | 0.218                          | 3042.97            | 662.30             | 0.252                          | 2397.17            | 603.66             |
| A_68_P21240002 | chr2:56966945-56966989                            | NM_013613:483            | Nr4a2         | INSIDE                 | 1.157                                                        | 0.187                          | 3697.74            | 692.27             | 0.217                          | 2757.04            | 597.32             |
| A_68_P29725072 | chr14:75346702-75346746                           | NM_001033439:960         | Lrch1         | INSIDE                 | 1.156                                                        | 1.446                          | 1014.34            | 1466.65            | 1.671                          | 880.62             | 1471.36            |
| A_68_P29613383 | chr14:55251294-55251338                           | NM_199470:8885           | Cdh24         | INSIDE                 | 1.156                                                        | 1.544                          | 1571.50            | 2426.64            | 1.785                          | 1162.37            | 2074.35            |
| A_68_P28935716 | chr13:34027599-34027643                           | NM_001164117:332         | Serpinb6a     | INSIDE                 | 1.156                                                        | 0.480                          | 1151.12            | 552.48             | 0.555                          | 974.81             | 540.89             |
| A_68_P26025443 | chr8:88079254-88079298                            | NM_019794:-106           | Dna1a2        | PROMOTER               | 1.156                                                        | 0.488                          | 2248.22            | 1098.18            | 0.565                          | 1765.13            | 996.96             |
| A_68_P25090605 | chr7:52263349-52263393                            | NM_001008422:8249        | Scaf1         | INSIDE                 | 1.156                                                        | 1.576                          | 661.91             | 1043.16            | 1.821                          | 593.57             | 1081.15            |
| A_68_P25087550 | chr7:51717698-51717742                            | NM_198250:19864          | Lrrc4b        | INSIDE                 | 1.156                                                        | 1.990                          | 1087.39            | 2163.71            | 2.300                          | 943.69             | 2170.27            |
| A_68_P23541414 | chr5:23889472-23889516                            | NM_008713:18858          | Nos3          | INSIDE                 | 1.156                                                        | 1.796                          | 1125.34            | 2021.22            | 2.077                          | 851.50             | 1768.17            |
| A_68_P23268973 | chr4:124252578-124252622                          | ENSMUST00000164308:6168  |               | INSIDE                 | 1.156                                                        | 0.243                          | 2886.00            | 701.17             | 0.281                          | 2121.13            | 595.70             |
| A_68_P22649277 | chr3:151872936-151872980                          | NM_027287:305            | Dnajb4        | INSIDE                 | 1.156                                                        | 2.333                          | 1408.35            | 3286.34            | 2.698                          | 1172.59            | 3163.39            |
| A_68_P22165085 | chr3:57539702-57539746                            | NM_011883:-263           | Rnf13         | PROMOTER               | 1.156                                                        | 0.392                          | 2165.21            | 849.67             | 0.453                          | 1876.80            | 851.02             |
| A_68_P30330813 | chr15:73342857-73342901                           | NM_001081066:-111        | Dennd3        | PROMOTER               | 1.155                                                        | 1.427                          | 3185.18            | 4543.84            | 1.648                          | 2476.27            | 4080.01            |
| A_68_P30128575 | chr15:34372745-34372789                           | NM_009083:214            | Rpl30         | INSIDE                 | 1.155                                                        | 0.313                          | 1638.04            | 512.14             | 0.361                          | 1432.37            | 517.22             |
| A_68_P29007695 | chr13:46514396-46514440                           | NM_001081425:750         | Rbm24         | INSIDE                 | 1.155                                                        | 1.948                          | 638.40             | 1243.69            | 2.249                          | 482.45             | 1085.16            |
| A_68_P28938194 | chr13:34436403-34436447                           | NM_001033167:627         | Sic22a23      | INSIDE                 | 1.155                                                        | 1.427                          | 1287.33            | 1836.50            | 1.648                          | 1081.40            | 1782.10            |
| A_68_P28862224 | chr13:19487507-19487551                           | NM_024270:93             | Stard3nl      | INSIDE                 | 1.155                                                        | 1.845                          | 680.83             | 1256.04            | 2.131                          | 566.44             | 1206.90            |
| A_68_P26710068 | A_68_P26710068                                    |                          | Unknown       |                        | 1.155                                                        | 0.606                          | 3125.41            | 1894.18            | 0.700                          | 2328.50            | 1629.99            |
| A_68_P26248944 | chr8:127536746-127536790                          | NM_016909:-128           | Tsnax         | PROMOTER               | 1.155                                                        | 0.521                          | 2198.72            | 1145.04            | 0.601                          | 1506.01            | 905.50             |
| A_68_P26232278 | chr8:124805221-124805265                          | NM_009569:-798           | Zfpml         | PROMOTER               | 1.155                                                        | 0.289                          | 2987.84            | 863.19             | 0.334                          | 2046.94            | 683.00             |

| ProbeName       | Target position of probe on CpG island microarray | TargetID           | GeneSymbol    | CpG island Description | Ratio of relative methylation (TiO <sub>2</sub> -NP/Vehicle) | Sham group                     |                    |                    | TiO <sub>2</sub> -H group      |                    |                    |
|-----------------|---------------------------------------------------|--------------------|---------------|------------------------|--------------------------------------------------------------|--------------------------------|--------------------|--------------------|--------------------------------|--------------------|--------------------|
|                 |                                                   |                    |               |                        |                                                              | Relative methylation (Cy5/Cy3) | Cy3 signal (Input) | Cy5 signal (MeDIP) | Relative methylation (Cy5/Cy3) | Cy3 signal (Input) | Cy5 signal (MeDIP) |
| A_68_P26142833  | chr8:109572050-109572094                          | NM_026513:442      | Pdf           | INSIDE                 | 1.155                                                        | 0.377                          | 1271.14            | 479.66             | 0.436                          | 924.51             | 403.07             |
| A_68_P25092883  | chr7:52650953-52650997                            | NM_009224:43       | Snmp70        | INSIDE                 | 1.155                                                        | 0.437                          | 2027.22            | 886.31             | 0.505                          | 1520.43            | 767.95             |
| A_68_P23456155  | chr5:5514599-5514644                              | NM_001193660:168   | Cldn12        | INSIDE                 | 1.155                                                        | 0.408                          | 1295.64            | 528.92             | 0.472                          | 1052.81            | 496.50             |
| A_68_P21862264  | chr2:171868280-171868324                          | NM_175631:664      | Cbln4         | INSIDE                 | 1.155                                                        | 0.215                          | 2797.42            | 600.66             | 0.248                          | 1885.76            | 467.57             |
| A_68_P21425372  | chr2:91762936-91762980                            | NM_007699:613      | Chrm4         | INSIDE                 | 1.155                                                        | 0.450                          | 2052.64            | 923.70             | 0.520                          | 1534.82            | 797.83             |
| A_68_P32462207  | chrX:70599165-70599209                            | NM_001160229:11227 | Zfp275        | INSIDE                 | 1.154                                                        | 2.422                          | 376.68             | 912.33             | 2.794                          | 480.37             | 1342.32            |
| A_68_P32050807  | chr19:29122028-29122072                           | NR_028360:78       | 1700018L02Rik | INSIDE                 | 1.154                                                        | 0.306                          | 2629.23            | 805.65             | 0.354                          | 2031.11            | 718.10             |
| A_68_P30884150  | chr16:76373795-76373839                           | NM_173440:522      | Nrip1         | PROMOTER               | 1.154                                                        | 0.357                          | 1354.84            | 483.15             | 0.412                          | 995.26             | 409.73             |
| A_68_P27708164  | chr11:35521558-35521602                           | NM_011412:586623   | Slit3         | INSIDE                 | 1.154                                                        | 1.590                          | 981.84             | 1561.11            | 1.835                          | 698.59             | 1281.89            |
| A_68_P27349650  | chr10:92185045-92185089                           | NM_008682:97       | Nedd1         | INSIDE                 | 1.154                                                        | 0.353                          | 1323.08            | 467.52             | 0.408                          | 1066.30            | 434.93             |
| A_68_P25392336  | chr7:112583704-112583750                          | NM_007627:9393     | Cckbr         | INSIDE                 | 1.154                                                        | 2.084                          | 725.24             | 1511.66            | 2.405                          | 566.24             | 1361.87            |
| A_68_P24592784  | chr6:83276117-83276161                            | NM_145571:106      | Mobkl1b       | INSIDE                 | 1.154                                                        | 0.389                          | 1962.63            | 763.79             | 0.449                          | 1476.02            | 662.96             |
| A_68_P22674484  | chr3:156225009-156225062                          | NM_177274:113      | Negr1         | INSIDE                 | 1.154                                                        | 8.014                          | 1065.30            | 8536.85            | 9.246                          | 961.54             | 8890.71            |
| A_68_P31053606  | chr17:12934729-12934773                           | NR_002853:574      | Airn          | INSIDE                 | 1.153                                                        | 2.532                          | 827.95             | 2096.57            | 2.921                          | 790.39             | 2308.42            |
| A_68_P30346611  | chr15:76011370-76011414                           | NM_201394:14748    | Plec          | INSIDE                 | 1.153                                                        | 3.260                          | 577.71             | 1883.28            | 3.760                          | 548.92             | 2063.80            |
| A_68_P29937482  | chr14:118635523-118635567                         | NM_177753:708      | Sox21         | INSIDE                 | 1.153                                                        | 0.201                          | 3873.48            | 776.71             | 0.231                          | 2577.92            | 595.89             |
| A_68_P28203006  | chr12:4924358-4924402                             | NM_001099628:222   | Atad2b        | INSIDE                 | 1.153                                                        | 2.282                          | 258.49             | 589.86             | 2.631                          | 236.74             | 622.83             |
| A_68_P26612672  | chr9:69607372-69607416                            | NM_022378:1353     | Foxb1         | INSIDE                 | 1.153                                                        | 0.315                          | 1701.96            | 535.94             | 0.363                          | 1309.96            | 475.54             |
| A_68_P26229921  | chr8:124474582-124474626                          | NM_001110100:172   | Banp          | INSIDE                 | 1.153                                                        | 6.238                          | 4284.41            | 26726.32           | 7.193                          | 3300.59            | 23740.87           |
| A_68_P24956667  | chr7:6683071-6683115                              | NM_008817:38       | Peg3          | INSIDE                 | 1.153                                                        | 2.078                          | 1909.50            | 3968.59            | 2.395                          | 1646.24            | 3943.31            |
| A_68_P22314347  | chr3:88340273-88340317                            | NR_035434:10       | Mir1905       | INSIDE                 | 1.153                                                        | 0.531                          | 2278.35            | 1208.81            | 0.612                          | 1430.11            | 874.64             |
| A_68_P21900704  | chr2:179710019-179710063                          | NM_001081092:1311  | Taf4a         | INSIDE                 | 1.153                                                        | 0.493                          | 1162.13            | 573.00             | 0.569                          | 1004.74            | 571.28             |
| A_68_P20852904  | chr1:178205035-178205079                          | NM_176916:387      | Pld5          | INSIDE                 | 1.153                                                        | 0.474                          | 3129.70            | 1482.32            | 0.546                          | 2234.83            | 1220.24            |
| A_68_P20138941  | chr1:34516537-34516581                            | NM_011206:32       | Ptpn18        | PROMOTER               | 1.153                                                        | 0.465                          | 1225.85            | 570.03             | 0.536                          | 937.91             | 502.93             |
| A_68_P31927968  | chr19:5307358-5307402                             | NM_001024717:9050  | Gal3st3       | INSIDE                 | 1.152                                                        | 1.766                          | 1418.19            | 2504.79            | 2.034                          | 1174.75            | 2389.54            |
| A_68_P31920645  | chr19:4012393-4012437                             | NM_133666:311      | Ndufv1        | INSIDE                 | 1.152                                                        | 0.174                          | 2667.99            | 465.41             | 0.201                          | 2002.56            | 402.26             |
| A_68_P31399352  | chr17:83913503-83913547                           | NM_001159529:149   | Cox7a2l       | INSIDE                 | 1.152                                                        | 2.014                          | 913.45             | 1839.67            | 2.321                          | 778.36             | 1806.42            |
| A_68_P30578587  | chr16:18248121-18248165                           | NM_011239:645      | Ranbp1        | INSIDE                 | 1.152                                                        | 0.422                          | 1309.96            | 553.19             | 0.487                          | 1060.61            | 516.20             |
| A_68_P303320408 | chr15:73526555-73526599                           | NM_173365:11359    | Gpr20         | INSIDE                 | 1.152                                                        | 2.735                          | 810.83             | 2217.73            | 3.150                          | 642.81             | 2025.12            |
| A_68_P28940415  | chr13:34838970-34839014                           | NM_138746:7482     | Fam50b        | INSIDE                 | 1.152                                                        | 5.539                          | 1047.06            | 5611.04            | 6.173                          | 826.79             | 5103.88            |
| A_68_P22180927  | chr3:60806813-60806857                            | NM_008772:118      | P2ry1         | INSIDE                 | 1.152                                                        | 0.406                          | 1672.30            | 678.36             | 0.468                          | 1253.91            | 586.21             |
| A_68_P21783960  | chr2:158440477-158440521                          | NM_009508:4005     | Slc32a1       | INSIDE                 | 1.152                                                        | 0.510                          | 1551.29            | 790.87             | 0.587                          | 1267.44            | 744.54             |
| A_68_P21489014  | chr2:104250060-104250104                          | NM_001033347:409   | D430041D05Rik | INSIDE                 | 1.152                                                        | 0.476                          | 1534.53            | 729.93             | 0.548                          | 1257.43            | 689.10             |
| A_68_P21072311  | chr2:25316393-25316437                            | NM_153557:200      | BC029214      | INSIDE                 | 1.152                                                        | 0.188                          | 2491.22            | 469.52             | 0.217                          | 1657.97            | 359.98             |
| A_68_P32464980  | chrX:71069698-71069742                            | NM_001029868:588   | Pdzd4         | INSIDE                 | 1.151                                                        | 4.180                          | 297.43             | 1243.36            | 4.810                          | 289.87             | 1394.39            |
| A_68_P31940127  | chr19:7568796-7568840                             | NM_146091:109      | Atf3          | PROMOTER               | 1.151                                                        | 0.270                          | 2042.23            | 551.90             | 0.311                          | 1381.60            | 429.88             |
| A_68_P31183535  | chr17:42453211-42453255                           | NM_028474:337      | 3110082D06Rik | INSIDE                 | 1.151                                                        | 0.241                          | 3833.29            | 925.06             | 0.278                          | 2563.50            | 711.80             |
| A_68_P31162046  | chr17:36117706-36117750                           | NM_008136:829      | Gnl1          | INSIDE                 | 1.151                                                        | 0.500                          | 1767.18            | 883.88             | 0.576                          | 1214.40            | 699.07             |
| A_68_P30639681  | chr16:30070804-30070848                           | NM_008235:5384     | Hes1          | DOWNSTREAM             | 1.151                                                        | 1.413                          | 5120.71            | 7233.25            | 1.626                          | 3907.73            | 6354.85            |
| A_68_P27594240  | chr11:11925551-11925597                           | NM_001177629:2400  | Grb10         | INSIDE                 | 1.151                                                        | 1.736                          | 939.53             | 1631.11            | 1.999                          | 899.55             | 1798.22            |
| A_68_P26350211  | chr9:21854807-21854851                            | NM_010487:1639     | Elavl3        | INSIDE                 | 1.151                                                        | 0.383                          | 1424.06            | 545.59             | 0.441                          | 1102.14            | 485.81             |
| A_68_P25951143  | chr8:72854752-72854796                            | NM_008107:1111     | Gdf1          | INSIDE                 | 1.151                                                        | 0.421                          | 1666.46            | 701.20             | 0.484                          | 1252.96            | 606.89             |
| A_68_P24604720  | chr6:85324839-85324883                            | NM_001003955:232   | Rab11fip5     | PROMOTER               | 1.151                                                        | 0.432                          | 1674.01            | 723.64             | 0.498                          | 1283.95            | 639.01             |
| A_68_P22649285  | chr3:151874067-151874111                          | NM_057172:667      | Fubp1         | INSIDE                 | 1.151                                                        | 0.547                          | 2035.33            | 1113.22            | 0.629                          | 1722.96            | 1084.57            |
| A_68_P22336391  | chr3:93247585-93247629                            | NM_001163098:1355  | Tchh          | INSIDE                 | 1.151                                                        | 1.550                          | 1690.69            | 2620.96            | 1.784                          | 1448.66            | 2584.61            |
| A_68_P21433076  | chr2:93028001-93028045                            | NM_001025246:282   | Trp53i11      | INSIDE                 | 1.151                                                        | 0.441                          | 1417.66            | 625.38             | 0.508                          | 1185.99            | 602.09             |
| A_68_P32554229  | chrX:96412142-96412186                            |                    | Unknown       | Unknown                | 1.150                                                        | 1.624                          | 502.42             | 815.79             | 1.867                          | 738.16             | 1378.41            |
| A_68_P31207972  | chr17:46766049-46766093                           | NM_175168:383      | Ptk7          | INSIDE                 | 1.150                                                        | 0.222                          | 3386.16            | 751.94             | 0.255                          | 2488.23            | 635.49             |
| A_68_P30421723  | chr15:88693456-88693500                           | NM_145478:855      | Pim3          | INSIDE                 | 1.150                                                        | 0.516                          | 1552.37            | 801.73             | 0.594                          | 1022.90            | 714.21             |
| A_68_P30018890  | chr15:11834572-11834616                           | NM_001039181:835   | Npr3          | INSIDE                 | 1.150                                                        | 0.185                          | 2976.96            | 550.11             | 0.212                          | 2026.04            | 430.47             |
| A_68_P29879699  | chr14:106294307-106294351                         | NM_011897:1708     | Spry2         | INSIDE                 | 1.150                                                        | 0.162                          | 3956.75            | 640.18             | 0.186                          | 2595.09            | 483.04             |
| A_68_P28100096  | chr11:106054873-106054917                         | NM_028126:32       | Strada        | PROMOTER               | 1.150                                                        | 0.265                          | 2310.69            | 612.24             | 0.305                          | 1641.69            | 500.26             |
| A_68_P27968098  | chr11:82577707-82577751                           | NM_009839:62       | Cct6b         | INSIDE                 | 1.150                                                        | 0.513                          | 1435.91            | 736.38             | 0.590                          | 1088.75            | 642.06             |
| A_68_P27926233  | chr11:75275698-75275742                           | NR_029739:1497     | Mir22         | PROMOTER               | 1.150                                                        | 2.728                          | 277.05             | 755.93             | 3.137                          | 193.98             | 608.47             |
| A_68_P27288892  | chr10:80788388-80788440                           | NM_027381:4567     | 2510012J08Rik | INSIDE                 | 1.150                                                        | 2.657                          | 898.50             | 2387.25            | 3.057                          | 737.34             | 2253.75            |
| A_68_P27284271  | chr10:80069708-80069752                           | NM_019575:4104     | Scamp4        | INSIDE                 | 1.150                                                        | 2.487                          | 1329.52            | 3306.83            | 2.859                          | 1014.69            | 2901.32            |
| A_68_P25502555  | chr7:133991327-133991371                          | NM_010069:282      | Doc2a         | INSIDE                 | 1.150                                                        | 0.365                          | 1374.52            | 501.54             | 0.420                          | 1099.33            | 461.43             |
| A_68_P21905657  | chr2:180436282-180436326                          | NM_175551:501      | Dido1         | INSIDE                 | 1.150                                                        | 0.255                          | 1998.35            | 510.26             | 0.294                          | 1372.14            | 402.84             |
| A_68_P21017267  | chr2:13496235-13496279                            | NM_011701:319      | Vim           | INSIDE                 | 1.150                                                        | 0.328                          | 2129.59            | 698.68             | 0.377                          | 1499.09            | 565.73             |
| A_68_P32696392  | chrX:136405520-136405564                          | NM_001193309:651   | Morc4         | INSIDE                 | 1.149                                                        | 1.609                          | 4720.96            | 7597.08            | 1.849                          | 6272.37            | 11595.94           |
| A_68_P30473042  | chr15:97923469-97923513                           | NM_144851:346      | Senp1         | INSIDE                 | 1.149                                                        | 0.338                          | 1458.34            | 492.26             | 0.388                          | 1104.48            | 428.55             |
| A_68_P24076587  | chr5:127722499-127722543                          | NM_175432:325      | Tmem132c      | INSIDE                 | 1.149                                                        | 0.357                          | 2341.18            | 835.00             | 0.410                          | 1684.14            | 689.97             |
| A_68_P24004707  | chr5:115021632-115021676                          | NM_001004180:3395  | BC057022      | INSIDE                 | 1.149                                                        | 0.171                          | 3244.04            | 556.30             | 0.197                          | 2405.66            | 473.96             |
| A_68_P21115868  | chr2:32391385-32391429                            | NM_153560:528      | Fam102a       | INSIDE                 | 1.149                                                        | 0.441                          | 2121.98            | 935.07             | 0.506                          | 1602.19            | 810.92             |
| A_68_P20221656  | chr1:51535340-51535384                            | NM_028696:119      | Obfc2a        | PROMOTER               | 1.149                                                        | 0.259                          | 5570.24            | 1443.76            | 0.298                          | 4377.69            | 1303.35            |

| ProbeName      | Target position of probe on CpG island microarray | TargetID                 | GeneSymbol    | CpG island Description | Ratio of relative methylation (TiO <sub>2</sub> -NP/Vehicle) | Sham group                     |                    |                    | TiO <sub>2</sub> -H group      |                    |                    |
|----------------|---------------------------------------------------|--------------------------|---------------|------------------------|--------------------------------------------------------------|--------------------------------|--------------------|--------------------|--------------------------------|--------------------|--------------------|
|                |                                                   |                          |               |                        |                                                              | Relative methylation (Cy5/Cy3) | Cy3 signal (Input) | Cy5 signal (MeDIP) | Relative methylation (Cy5/Cy3) | Cy3 signal (Input) | Cy5 signal (MeDIP) |
| A_68_P31424878 | chr17:88145892-88145936                           | NM_199251:51420          | Kenk12        | INSIDE                 | 1.148                                                        | 1.532                          | 1476.95            | 2263.30            | 1.760                          | 1162.87            | 2046.52            |
| A_68_P31201706 | chr17:45682619-45682663                           | NM_001013749:3986        | Tmem151b      | INSIDE                 | 1.148                                                        | 0.406                          | 1823.87            | 739.90             | 0.466                          | 1154.65            | 537.87             |
| A_68_P31157970 | chr17:35293556-35293603                           | NM_001199044:8243        | Prc2a         | INSIDE                 | 1.148                                                        | 5.570                          | 267.40             | 1489.46            | 6.395                          | 123.09             | 787.17             |
| A_68_P26807153 | chr9:107133795-107133839                          | NM_153413:424            | Dock3         | INSIDE                 | 1.148                                                        | 0.509                          | 1290.63            | 656.96             | 0.584                          | 1099.25            | 642.40             |
| A_68_P24994423 | chr7:20214968-20215012                            | NM_009046:-203           | Relb          | PROMOTER               | 1.148                                                        | 0.421                          | 1603.84            | 675.46             | 0.483                          | 1203.92            | 581.87             |
| A_68_P24928967 | chr6:146450896-146450940                          | NM_010586:-484           | Itpr2         | PROMOTER               | 1.148                                                        | 0.339                          | 2169.07            | 735.31             | 0.389                          | 1769.95            | 688.59             |
| A_68_P23339119 | chr4:136852669-136852713                          | NM_009523:19141          | Wnt4          | INSIDE                 | 1.148                                                        | 2.733                          | 697.88             | 1907.36            | 3.137                          | 616.52             | 1933.89            |
| A_68_P21774856 | chr2:156866097-156866141                          | NM_001164663:38883       | 9830001H06Rik | INSIDE                 | 1.148                                                        | 3.051                          | 605.06             | 1846.00            | 3.501                          | 511.55             | 1790.97            |
| A_68_P20768477 | chr1:162723220-162723264                          | NM_013862:-173           | Rabgap1l      | PROMOTER               | 1.148                                                        | 19.370                         | 8266.08            | 160112.30          | 22.230                         | 8115.50            | 180408.80          |
| A_68_P32461572 | chrX:70474075-70474119                            | NM_007978:452            | F8a           | INSIDE                 | 1.147                                                        | 1.659                          | 436.78             | 724.76             | 1.904                          | 521.16             | 992.26             |
| A_68_P31830206 | chr18:74367357-74367401                           | NM_001164355:94          | Ska1          | INSIDE                 | 1.147                                                        | 0.420                          | 2584.85            | 1085.36            | 0.482                          | 1765.85            | 850.45             |
| A_68_P30588849 | chr16:20672661-20672705                           | NM_001005331:-139        | Eif4g1        | PROMOTER               | 1.147                                                        | 0.331                          | 3340.70            | 1107.23            | 0.380                          | 2323.65            | 883.29             |
| A_68_P29696150 | chr14:70009101-70009145                           | NM_033325:-160           | Loxl2         | PROMOTER               | 1.147                                                        | 0.239                          | 4706.81            | 1126.77            | 0.275                          | 3529.23            | 969.20             |
| A_68_P29134817 | chr13:72767989-72768033                           | NM_010574:1585           | Irx2          | INSIDE                 | 1.147                                                        | 0.436                          | 1564.72            | 682.02             | 0.500                          | 1203.02            | 601.44             |
| A_68_P27290090 | chr10:80958685-80958729                           | NM_134009:402            | Ncln          | INSIDE                 | 1.147                                                        | 0.303                          | 2194.61            | 665.24             | 0.348                          | 1525.34            | 530.21             |
| A_68_P26640504 | chr9:74696320-74696364                            | ENSMUST00000160842:-459  |               | PROMOTER               | 1.147                                                        | 0.186                          | 3306.19            | 613.80             | 0.213                          | 2119.64            | 451.54             |
| A_68_P25954893 | chr8:73437576-73437620                            | NM_173013:7726           | Mtap1s        | INSIDE                 | 1.147                                                        | 2.732                          | 619.98             | 1693.92            | 3.133                          | 459.36             | 1439.03            |
| A_68_P23968409 | chr5:108150354-108150398                          | NM_010278:2987           | Gfi1          | INSIDE                 | 1.147                                                        | 0.147                          | 3043.22            | 448.51             | 0.169                          | 2501.33            | 422.86             |
| A_68_P23893303 | chr5:92706870-92706914                            | NM_001163687:315         | Naaa          |                        | 1.147                                                        | 0.282                          | 2056.38            | 578.98             | 0.323                          | 1401.05            | 452.57             |
| A_68_P23436702 | chr4:154524641-154524685                          | NM_011385:71982          | Ski           | DOWNSTREAM             | 1.147                                                        | 0.249                          | 2465.51            | 614.13             | 0.286                          | 1642.70            | 469.29             |
| A_68_P21837475 | chr2:167603130-167603174                          | ENSMUST00000124850:-4400 |               | PROMOTER               | 1.147                                                        | 1.764                          | 648.02             | 1143.42            | 2.023                          | 595.24             | 1204.23            |
| A_68_P31117836 | chr17:27822046-27822090                           | NM_178365:-130           | Pacs1n1       | PROMOTER               | 1.146                                                        | 0.275                          | 1758.90            | 483.67             | 0.315                          | 1439.46            | 453.64             |
| A_68_P30670705 | chr16:35541905-35541949                           | NM_013661:479            | Sema5b        | INSIDE                 | 1.146                                                        | 0.504                          | 2062.10            | 1039.00            | 0.577                          | 1642.58            | 948.23             |
| A_68_P29335935 | chr13:113442657-113442701                         | NM_001145885:-160        | Ddx4          | DIVERGENT_PROMOTER     | 1.146                                                        | 2.258                          | 585.70             | 1322.37            | 2.588                          | 500.49             | 1295.29            |
| A_68_P26601253 | chr9:67679488-67679532                            | NM_001163143:627         | C2cd4a        |                        | 1.146                                                        | 0.440                          | 2460.40            | 1081.52            | 0.504                          | 1851.56            | 932.98             |
| A_68_P26238821 | chr8:125778775-125778819                          | NM_020497:702            | Zfp276        | INSIDE                 | 1.146                                                        | 0.548                          | 1654.30            | 905.75             | 0.628                          | 1335.08            | 837.90             |
| A_68_P26022868 | chr8:87489665-87489709                            | NM_027187:224            | Rnasch2a      | INSIDE                 | 1.146                                                        | 0.244                          | 2326.90            | 567.54             | 0.280                          | 1643.97            | 459.67             |
| A_68_P25776088 | chr8:35871210-35871254                            | NM_176933:569            | Dusp4         | INSIDE                 | 1.146                                                        | 0.362                          | 2563.63            | 927.66             | 0.415                          | 1911.00            | 792.49             |
| A_68_P25545210 | chr7:141416870-141416914                          | NM_007400:-112           | Adam12        | PROMOTER               | 1.146                                                        | 0.426                          | 3451.12            | 1468.87            | 0.488                          | 2224.28            | 1084.56            |
| A_68_P24424710 | chr6:47827670-47827714                            | NM_146175:139            | Zfp282        | INSIDE                 | 1.146                                                        | 1.467                          | 845.45             | 1240.45            | 1.681                          | 715.37             | 1202.47            |
| A_68_P23794549 | chr5:73305228-73305272                            | NM_001113423:-305        | Slain2        | PROMOTER               | 1.146                                                        | 1.632                          | 1475.69            | 2408.87            | 1.871                          | 1180.83            | 2208.94            |
| A_68_P21421301 | chr2:91042892-91042936                            | NM_007387:-154           | Acp2          | DIVERGENT_PROMOTER     | 1.146                                                        | 0.124                          | 3665.06            | 453.48             | 0.142                          | 2634.53            | 373.56             |
| A_68_P21147617 | chr2:38203630-38203674                            | NM_010710:-3175          | Lhx2          | PROMOTER               | 1.146                                                        | 0.523                          | 1997.40            | 1044.31            | 0.599                          | 1401.09            | 839.72             |
| A_68_P31711733 | chr18:53336104-53336148                           | NM_026386:108            | Smx2          | INSIDE                 | 1.145                                                        | 2.197                          | 720.10             | 1581.78            | 2.516                          | 532.38             | 1339.25            |
| A_68_P26145654 | chr8:110112041-110112085                          | NM_010817:320            | Psmc7         | INSIDE                 | 1.145                                                        | 0.576                          | 2511.87            | 1446.99            | 0.660                          | 1988.46            | 1311.78            |
| A_68_P26134606 | chr8:108089561-108089605                          | NM_013477:358            | Atp6v0d1      | INSIDE                 | 1.145                                                        | 0.453                          | 2217.96            | 1004.25            | 0.519                          | 1551.63            | 804.69             |
| A_68_P21495905 | chr2:105509058-105509107                          | NR_002867:1405           | Pax6os1       | INSIDE                 | 1.145                                                        | 0.518                          | 1495.50            | 774.52             | 0.593                          | 1110.08            | 658.36             |
| A_68_P20636645 | chr1:136884255-136884299                          | NM_001033409:117577      | Lgr6          | INSIDE                 | 1.145                                                        | 13.440                         | 2188.74            | 29416.00           | 15.391                         | 1822.59            | 28050.68           |
| A_68_P32341136 | chrX:39503692-39503736                            | NM_021465:-163           | Stag2         | PROMOTER               | 1.144                                                        | 2.167                          | 485.90             | 1052.86            | 2.479                          | 567.28             | 1406.39            |
| A_68_P29616395 | chr14:55732380-55732424                           | NM_177049:3370           | Jph4          | INSIDE                 | 1.144                                                        | 2.150                          | 914.68             | 1966.94            | 2.461                          | 777.90             | 1914.32            |
| A_68_P28751328 | chr12:113858149-113858193                         | NM_007421:-87            | Adssl1        | PROMOTER               | 1.144                                                        | 1.767                          | 1502.31            | 2653.87            | 2.021                          | 1098.69            | 2220.67            |
| A_68_P27889187 | chr11:68213377-68213421                           | ENSMUST00000108674:927   |               | INSIDE                 | 1.144                                                        | 0.480                          | 2995.16            | 1437.15            | 0.549                          | 2140.83            | 1174.82            |
| A_68_P27794870 | chr11:51420420-51420464                           | NM_001048061:-59         | Hmnpab        | PROMOTER               | 1.144                                                        | 0.570                          | 3299.83            | 1880.33            | 0.652                          | 2199.78            | 1433.84            |
| A_68_P27287711 | chr10:80610869-80610913                           | NM_010731:11875          | Zbtb7a        | INSIDE                 | 1.144                                                        | 2.040                          | 1690.04            | 3447.99            | 2.335                          | 1178.46            | 2751.26            |
| A_68_P26136633 | chr8:108424693-108424737                          | NM_173432:341            | Pskh1         | INSIDE                 | 1.144                                                        | 0.263                          | 2073.32            | 544.95             | 0.301                          | 1534.28            | 461.27             |
| A_68_P23513995 | chr5:18733341-18733385                            | NM_001170746:499         | Magi2         | INSIDE                 | 1.144                                                        | 0.319                          | 1905.36            | 608.16             | 0.365                          | 1276.19            | 465.80             |
| A_68_P23365310 | chr4:141220298-141220342                          | NM_001033150:-290        | Plekhn2       | PROMOTER               | 1.144                                                        | 0.311                          | 3240.98            | 1006.88            | 0.355                          | 2315.26            | 822.68             |
| A_68_P31219171 | chr17:48925588-48925633                           |                          |               | Unknown                | 1.143                                                        | 1.897                          | 447.77             | 849.36             | 2.167                          | 403.86             | 875.26             |
| A_68_P31110246 | chr17:26576080-26576124                           | NM_001081656:24193       | Neurl1b       | INSIDE                 | 1.143                                                        | 1.990                          | 887.94             | 1766.93            | 2.274                          | 796.62             | 1811.18            |
| A_68_P30500796 | chr15:102765447-102765491                         | NM_010463:-1815          | Hoxc12        | PROMOTER               | 1.143                                                        | 0.340                          | 2107.50            | 716.27             | 0.388                          | 1727.48            | 671.07             |
| A_68_P23998980 | chr5:114037914-114037958                          | NM_177292:118470         | Wscd2         | INSIDE                 | 1.143                                                        | 2.134                          | 1572.41            | 3355.75            | 2.439                          | 1201.55            | 2930.21            |
| A_68_P22401913 | chr3:106285353-106285397                          | NM_001093754:26          | Dennd2d       | INSIDE                 | 1.143                                                        | 2.571                          | 1697.74            | 4365.47            | 2.939                          | 1449.48            | 4260.05            |
| A_68_P21817622 | chr2:164226486-164226530                          | NM_009036:-2185          | Rbpj1         | PROMOTER               | 1.143                                                        | 0.165                          | 2863.43            | 471.20             | 0.188                          | 1917.49            | 360.68             |
| A_68_P21775424 | chr2:156960529-156960573                          | NM_001139520:408         | Samhd1        | INSIDE                 | 1.143                                                        | 0.371                          | 1287.36            | 477.34             | 0.424                          | 1070.35            | 453.66             |
| A_68_P21150010 | chr2:38566321-38566365                            | NM_139051:3720           | Nr5a1         | INSIDE                 | 1.143                                                        | 0.381                          | 1607.40            | 612.28             | 0.435                          | 1233.58            | 537.15             |
| A_68_P20377582 | chr1:79758038-79758082                            | NM_00111279:284          | Wdly1         | INSIDE                 | 1.143                                                        | 0.341                          | 4164.25            | 1421.55            | 0.390                          | 2986.27            | 1164.90            |
| A_68_P31836526 | chr18:75526561-75526605                           | NM_001042660:-436        | Smad7         | PROMOTER               | 1.142                                                        | 0.207                          | 3103.18            | 643.82             | 0.237                          | 2281.77            | 540.83             |
| A_68_P31121929 | chr17:28478200-28478244                           | NM_001204156:9069        | Tea3          | INSIDE                 | 1.142                                                        | 0.487                          | 1530.12            | 744.55             | 0.556                          | 1225.76            | 681.15             |
| A_68_P31092440 | chr17:23713162-23713206                           | NM_011747:23270          | Zfp13         | INSIDE                 | 1.142                                                        | 2.363                          | 1378.21            | 3256.14            | 2.697                          | 1092.52            | 2946.77            |
| A_68_P29701214 | chr14:70828882-70828926                           | NM_021308:-3             | Piwil2        | PROMOTER               | 1.142                                                        | 3.012                          | 1291.02            | 3888.68            | 3.438                          | 964.61             | 3316.73            |
| A_68_P28083441 | chr11:102979217-102979261                         | NM_138753:1600           | Hexim1        | INSIDE                 | 1.142                                                        | 0.489                          | 1583.73            | 773.85             | 0.558                          | 1195.26            | 646.74             |
| A_68_P26682080 | chr9:83039935-83039979                            | NM_026122:258            | Hmgn3         | INSIDE                 | 1.142                                                        | 0.409                          | 2020.80            | 826.09             | 0.467                          | 1620.78            | 756.41             |
| A_68_P23993056 | chr5:113006473-113006517                          | NM_019982:-289           | Szcg1         | PROMOTER               | 1.142                                                        | 0.295                          | 1848.41            | 545.21             | 0.337                          | 1404.04            | 472.98             |
| A_68_P23593807 | chr5:34678844-34678888                            | NM_011278:-172           | Rnf4          | PROMOTER               | 1.142                                                        | 0.421                          | 1474.56            | 620.92             | 0.481                          | 1285.95            | 618.36             |
| A_68_P22968877 | chr4:62875556-62875600                            | NM_025685:-867           | Col27a1       | PROMOTER               | 1.142                                                        | 0.253                          | 5541.78            | 1399.61            | 0.288                          | 3879.82            | 1119.01            |

| ProbeName      | Target position of probe on CpG island microarray | TargetID                 | GeneSymbol    | CpG island Description | Ratio of relative methylation (TiO <sub>2</sub> -NP/Vehicle) | Sham group                     |                    |                    | TiO <sub>2</sub> -H group      |                    |                    |
|----------------|---------------------------------------------------|--------------------------|---------------|------------------------|--------------------------------------------------------------|--------------------------------|--------------------|--------------------|--------------------------------|--------------------|--------------------|
|                |                                                   |                          |               |                        |                                                              | Relative methylation (Cy5/Cy3) | Cy3 signal (Input) | Cy5 signal (MeDIP) | Relative methylation (Cy5/Cy3) | Cy3 signal (Input) | Cy5 signal (MeDIP) |
| A_68_P22958317 | chr4:5979668-59796712                             | NM_001013577:37          | 1110054005Rik | INSIDE                 | 1.142                                                        | 0.136                          | 5896.95            | 801.32             | 0.155                          | 4481.30            | 695.30             |
| A_68_P21839459 | chr2:167924216-167924266                          | NM_021409:17737          | Pard6b        | INSIDE                 | 1.142                                                        | 2.003                          | 469.45             | 940.42             | 2.287                          | 339.46             | 776.41             |
| A_68_P20264196 | chr1:59540370-59540414                            | NM_008057:1402           | Fzd7          | INSIDE                 | 1.142                                                        | 0.119                          | 5232.61            | 622.55             | 0.136                          | 3752.67            | 510.09             |
| A_68_P32288521 | chrX:20002973-20003017                            | ENSMUST00000136093:81    |               | INSIDE                 | 1.141                                                        | 2.275                          | 1191.68            | 2711.06            | 2.595                          | 1560.05            | 4047.93            |
| A_68_P31157498 | chr17:35226674-35226718                           | NM_178592:461            | Abbd16a       | INSIDE                 | 1.141                                                        | 0.449                          | 2010.49            | 901.79             | 0.512                          | 1465.00            | 749.47             |
| A_68_P31100079 | chr17:25023157-25023201                           | NM_011956:117            | Nubp2         | INSIDE                 | 1.141                                                        | 0.174                          | 5378.38            | 934.62             | 0.198                          | 3679.70            | 729.42             |
| A_68_P30693870 | chr16:39985032-39985076                           | AK082117:347             |               | INSIDE                 | 1.141                                                        | 0.501                          | 4129.42            | 2066.86            | 0.571                          | 2900.30            | 1656.91            |
| A_68_P29455232 | chr14:22668131-22668175                           | NM_026965:20             | Comtd1        | PROMOTER               | 1.141                                                        | 0.161                          | 3098.66            | 499.49             | 0.184                          | 2141.19            | 393.66             |
| A_68_P28744814 | chr12:112812598-112812642                         | NM_021516:100            | Mark3         | PROMOTER               | 1.141                                                        | 0.361                          | 2417.00            | 872.15             | 0.412                          | 1830.30            | 753.53             |
| A_68_P27539536 | chr10:127534079-127534123                         | NM_054078:4262           | Baz2a         | INSIDE                 | 1.141                                                        | 1.484                          | 754.18             | 1118.92            | 1.693                          | 619.51             | 1048.69            |
| A_68_P24771682 | chr6:115494959-115495004                          | NM_199033:260            | Tsen2         | INSIDE                 | 1.141                                                        | 2.403                          | 311.78             | 749.19             | 2.741                          | 248.27             | 680.55             |
| A_68_P24605096 | chr6:85401513-85401557                            | NM_007638:36             | Cct7          | INSIDE                 | 1.141                                                        | 0.458                          | 1148.71            | 525.82             | 0.522                          | 913.78             | 477.16             |
| A_68_P23284714 | chr4:127003444-127003488                          | NM_008126:2903           | Gjb3          | INSIDE                 | 1.141                                                        | 1.522                          | 1073.58            | 1633.91            | 1.737                          | 822.31             | 1428.11            |
| A_68_P23253637 | chr4:120527431-120527475                          | ENSMUST00000106283:-6929 |               | PROMOTER               | 1.141                                                        | 1.636                          | 1516.03            | 2480.37            | 1.867                          | 1125.74            | 2101.82            |
| A_68_P23156637 | chr4:101390213-101390257                          | NM_010704:223            | Lepr          | INSIDE                 | 1.141                                                        | 0.195                          | 2429.19            | 472.76             | 0.222                          | 1780.02            | 395.33             |
| A_68_P22376196 | chr3:101408366-101408410                          | NM_144900:192            | Atp1a1        | INSIDE                 | 1.141                                                        | 2.363                          | 726.63             | 1716.75            | 2.696                          | 564.75             | 1522.72            |
| A_68_P21571541 | chr2:119613237-119613281                          | NM_001163701:15          | Rpap1         | INSIDE                 | 1.141                                                        | 0.393                          | 1506.71            | 591.46             | 0.448                          | 1285.60            | 575.79             |
| A_68_P20377581 | chr1:79757938-79757982                            | NM_001111279:384         | Wdly1         | INSIDE                 | 1.141                                                        | 0.394                          | 3087.38            | 1216.64            | 0.450                          | 2260.96            | 1017.00            |
| A_68_P31161378 | chr17:36003437-36003481                           | NM_175242:101            | 2310014H01Rik | PROMOTER               | 1.140                                                        | 0.373                          | 1846.34            | 689.09             | 0.426                          | 1521.55            | 647.51             |
| A_68_P30716740 | chr16:43618606-43618656                           | NM_019778:371234         | Zbtb20        | INSIDE                 | 1.140                                                        | 2.507                          | 244.43             | 612.76             | 2.857                          | 223.79             | 639.30             |
| A_68_P28186833 | chr11:120657765-120657809                         | NM_026824:77             | Dus1l         | PROMOTER               | 1.140                                                        | 0.530                          | 1869.00            | 990.98             | 0.604                          | 1356.90            | 819.98             |
| A_68_P27979771 | chr11:84632822-84632866                           | NM_145433:173            | Mrm1          | INSIDE                 | 1.140                                                        | 0.272                          | 6246.23            | 1700.79            | 0.310                          | 3937.09            | 1222.03            |
| A_68_P27751867 | chr1:143519036-43519080                           | NM_027557:23559          | Pwwp2a        | INSIDE                 | 1.140                                                        | 1.543                          | 707.59             | 1091.59            | 1.758                          | 662.83             | 1165.35            |
| A_68_P27284175 | chr10:80049466-80049510                           | NM_145421:3598           | Fam108a       | INSIDE                 | 1.140                                                        | 4.671                          | 1080.57            | 5047.50            | 5.323                          | 1054.43            | 5612.80            |
| A_68_P27278630 | chr10:79202255-79202299                           | NM_172551:7050           | Polmt         | INSIDE                 | 1.140                                                        | 1.875                          | 1690.84            | 3170.42            | 2.138                          | 1392.30            | 2977.15            |
| A_68_P27266462 | chr10:76628409-76628453                           | NM_009929:845            | Col18a1       | INSIDE                 | 1.140                                                        | 0.501                          | 1630.24            | 816.97             | 0.572                          | 1272.14            | 727.05             |
| A_68_P25435069 | chr7:121398243-121398287                          | NM_033370:70             | Copb1         | PROMOTER               | 1.140                                                        | 0.358                          | 1238.45            | 442.86             | 0.408                          | 1018.03            | 415.12             |
| A_68_P24328146 | chr6:29685667-29685711                            | NM_176996:192            | Smo           | INSIDE                 | 1.140                                                        | 3.943                          | 1188.88            | 4688.28            | 4.497                          | 954.73             | 4293.21            |
| A_68_P25386711 | chr5:33361070-33361114                            | NM_011738:372            | Ywhah         | PROMOTER               | 1.140                                                        | 0.416                          | 1257.28            | 522.43             | 0.474                          | 984.51             | 466.49             |
| A_68_P31415133 | chr17:86566520-86566564                           | NM_011104:582            | Prkce         | PROMOTER               | 1.139                                                        | 0.423                          | 1871.02            | 791.26             | 0.482                          | 1450.89            | 698.94             |
| A_68_P31187141 | chr17:43154407-43154452                           | NM_178589:926            | Tnfrsf21      | INSIDE                 | 1.139                                                        | 0.388                          | 5598.12            | 2169.99            | 0.442                          | 3695.46            | 1632.11            |
| A_68_P28450510 | chr12:56181387-56181431                           | NM_011899:74             | Srp54a        | DIVERGENT_PROMOTER     | 1.139                                                        | 0.475                          | 1773.00            | 842.82             | 0.541                          | 1266.42            | 685.53             |
| A_68_P27633195 | chr11:20640941-20640985                           | NM_181411:525            | Aftph         | INSIDE                 | 1.139                                                        | 6.466                          | 1258.02            | 8134.69            | 7.366                          | 1024.84            | 7548.83            |
| A_68_P26918730 | chr10:6980043-6980089                             | NM_133485:325            | Ppp1r14c      | INSIDE                 | 1.139                                                        | 0.397                          | 2983.27            | 1183.78            | 0.452                          | 2033.25            | 918.94             |
| A_68_P26810384 | chr9:107579026-107579070                          | NM_008140:2875           | Gnat1         | INSIDE                 | 1.139                                                        | 0.318                          | 1888.92            | 600.30             | 0.362                          | 1566.72            | 567.33             |
| A_68_P26749716 | chr9:96789602-96789646                            | NM_153420:217            | Acpl2         | INSIDE                 | 1.139                                                        | 0.227                          | 8600.24            | 1953.02            | 0.259                          | 5764.23            | 1490.65            |
| A_68_P26721431 | chr9:91250815-91250859                            | NM_009573:9801           | Zic1          | DOWNSTREAM             | 1.139                                                        | 2.374                          | 586.78             | 1393.30            | 2.704                          | 551.35             | 1490.93            |
| A_68_P24828016 | chr6:126594679-126594723                          | NM_010595:1119           | Kcna1         | INSIDE                 | 1.139                                                        | 0.257                          | 1795.81            | 461.70             | 0.293                          | 1435.52            | 420.20             |
| A_68_P24059430 | chr5:124573768-124573812                          | NM_011256:92637          | Pitpnm2       | INSIDE                 | 1.139                                                        | 2.028                          | 853.64             | 1731.08            | 2.309                          | 641.70             | 1481.64            |
| A_68_P21769577 | chr2:155937298-155937342                          | NM_170588:381            | Cpne1         | INSIDE                 | 1.139                                                        | 2.335                          | 3039.96            | 7097.65            | 2.659                          | 2614.85            | 6952.96            |
| A_68_P21395113 | chr2:84712639-84712683                            | NM_199223:14189          | Rtn4rl2       | INSIDE                 | 1.139                                                        | 1.790                          | 597.37             | 1069.51            | 2.039                          | 498.96             | 1017.54            |
| A_68_P32217856 | chr19:59268460-59268504                           |                          | Unknown       |                        | 1.138                                                        | 0.418                          | 3132.72            | 1310.62            | 0.476                          | 2522.83            | 1201.15            |
| A_68_P31067774 | chr17:15967950-15967994                           | NM_178615:4422           | Rgmb          | PROMOTER               | 1.138                                                        | 0.302                          | 3329.67            | 1004.99            | 0.344                          | 2462.59            | 846.14             |
| A_68_P28115684 | chr11:108782304-108782348                         | NM_015732:664            | Axin2         | INSIDE                 | 1.138                                                        | 0.190                          | 3686.44            | 700.78             | 0.216                          | 2784.13            | 602.41             |
| A_68_P27445216 | chr10:110182710-110182754                         | NM_178609:212            | E2f7          | INSIDE                 | 1.138                                                        | 0.303                          | 2031.04            | 615.54             | 0.345                          | 1719.87            | 593.40             |
| A_68_P26847148 | chr9:114842896-114842940                          | NM_175380:187            | Gpd1l         | INSIDE                 | 1.138                                                        | 0.244                          | 2149.29            | 523.72             | 0.277                          | 1620.97            | 449.62             |
| A_68_P26710359 | chr9:88376679-88376723                            | NM_019796:535            | Syncrip       | INSIDE                 | 1.138                                                        | 1.937                          | 678.74             | 1314.93            | 2.205                          | 560.22             | 1235.52            |
| A_68_P26567943 | chr9:61794500-61794544                            | NM_024425:84             | Kif23         | INSIDE                 | 1.138                                                        | 1.480                          | 1549.00            | 2292.83            | 1.684                          | 1146.12            | 1929.77            |
| A_68_P25981541 | chr8:79709878-79709922                            | NM_001083906:283494      | Nr3c2         | INSIDE                 | 1.138                                                        | 2.378                          | 1010.56            | 2403.21            | 2.707                          | 856.67             | 2319.17            |
| A_68_P22601418 | chr3:143865112-143865156                          | NM_001161770:162         | Lmo4          | INSIDE                 | 1.138                                                        | 1.862                          | 3427.90            | 6383.27            | 2.119                          | 2461.32            | 5215.26            |
| A_68_P22321903 | chr3:89635681-89635725                            | NM_172530:411            | She           | INSIDE                 | 1.138                                                        | 2.202                          | 554.65             | 1221.41            | 2.505                          | 482.48             | 1208.84            |
| A_68_P32260375 | chrX:11668929-11668973                            | NM_001168321:68531       | Bcor          | INSIDE                 | 1.137                                                        | 1.847                          | 469.66             | 867.63             | 2.100                          | 494.20             | 1037.71            |
| A_68_P30346631 | chr15:76013891-76013935                           | NM_201394:12228          | Plec          | INSIDE                 | 1.137                                                        | 1.666                          | 1412.39            | 2353.48            | 1.894                          | 1031.30            | 1953.33            |
| A_68_P28914111 | chr13:29947064-29947108                           | NM_144536:371            | Cdkal1        | INSIDE                 | 1.137                                                        | 3.418                          | 1153.16            | 3941.10            | 3.887                          | 982.18             | 3817.37            |
| A_68_P23962876 | chr5:107125079-107125123                          | NM_026856:749            | Zfp644        | INSIDE                 | 1.137                                                        | 0.253                          | 2692.00            | 681.12             | 0.288                          | 1905.38            | 548.33             |
| A_68_P32697221 | chrX:136596305-136596349                          | NM_001081668:781         | Nup62cl       | INSIDE                 | 1.136                                                        | 1.885                          | 567.33             | 1069.32            | 2.142                          | 657.84             | 1409.07            |
| A_68_P32129171 | chr19:43954139-43954183                           | NM_028029:32722          | Dnmbp         | INSIDE                 | 1.136                                                        | 0.189                          | 3118.74            | 588.54             | 0.214                          | 2388.89            | 512.00             |
| A_68_P30540361 | chr16:9994922-9994966                             | NM_008170:2318           | Grin2a        | PROMOTER               | 1.136                                                        | 0.340                          | 1560.49            | 530.32             | 0.386                          | 1220.84            | 471.14             |
| A_68_P30330816 | chr15:73343260-73343304                           | NM_001081066:293         | Dennd3        | INSIDE                 | 1.136                                                        | 0.422                          | 1689.47            | 712.62             | 0.479                          | 1324.94            | 634.69             |
| A_68_P27615063 | chr11:17157655-17157699                           | NM_020558:56             | C1d           | INSIDE                 | 1.136                                                        | 0.136                          | 4186.19            | 569.60             | 0.155                          | 2746.59            | 424.50             |
| A_68_P27098027 | chr10:42740871-42740915                           | NM_175407:153444         | Sobp          | INSIDE                 | 1.136                                                        | 0.383                          | 1397.27            | 534.83             | 0.435                          | 1050.66            | 456.82             |
| A_68_P25050066 | chr7:36371059-36371104                            | NM_178263:184            | Ankrd27       | DIVERGENT_PROMOTER     | 1.136                                                        | 0.309                          | 1822.88            | 562.75             | 0.351                          | 1247.91            | 437.81             |
| A_68_P25017512 | chr7:28271931-28271975                            | NM_018820:19             | Sertad1       | PROMOTER               | 1.136                                                        | 0.241                          | 2565.06            | 617.63             | 0.274                          | 1860.51            | 509.08             |
| A_68_P23600187 | chr5:35731282-35731326                            | NM_010445:461            | Hmx1          | PROMOTER               | 1.136                                                        | 0.393                          | 2114.82            | 830.42             | 0.446                          | 1591.32            | 710.03             |
| A_68_P21909035 | chr2:180922349-180922393                          | NM_025598:323            | Pdpd1         | INSIDE                 | 1.136                                                        | 0.534                          | 2021.92            | 1079.08            | 0.606                          | 1620.58            | 982.44             |

| ProbeName      | Target position of probe on CpG island microarray | TargetID                | GeneSymbol    | CpG island Description | Ratio of relative methylation (TiO <sub>2</sub> -NP/Vehicle) | Sham group                     |                    |                    | TiO <sub>2</sub> -H group      |                    |                    |
|----------------|---------------------------------------------------|-------------------------|---------------|------------------------|--------------------------------------------------------------|--------------------------------|--------------------|--------------------|--------------------------------|--------------------|--------------------|
|                |                                                   |                         |               |                        |                                                              | Relative methylation (Cy5/Cy3) | Cy3 signal (Input) | Cy5 signal (MeDIP) | Relative methylation (Cy5/Cy3) | Cy3 signal (Input) | Cy5 signal (MeDIP) |
| A_68_P20832387 | chr1:174255748-174255792                          | NM_008429:3624          | Kcnj9         | INSIDE                 | 1.136                                                        | 2.910                          | 3488.32            | 10149.39           | 3.304                          | 2641.16            | 8726.65            |
| A_68_P20584833 | chr1:127332293-127332337                          | NM_001205385:-10        | Actr3         | PROMOTER               | 1.136                                                        | 3.489                          | 248.94             | 868.52             | 3.963                          | 209.44             | 829.91             |
| A_68_P20085267 | chr1:22813048-22813092                            | NM_001012623:-507       | Rims1         | PROMOTER               | 1.136                                                        | 0.218                          | 2100.76            | 457.02             | 0.247                          | 1570.51            | 388.20             |
| A_68_P31123145 | chr17:28712577-28712621                           | NM_026571:-65           | Lhfp15        | PROMOTER               | 1.135                                                        | 1.833                          | 898.42             | 1646.54            | 2.080                          | 756.54             | 1573.66            |
| A_68_P30127810 | chr15:34236528-34236572                           | NM_016762:115           | Matn2         | INSIDE                 | 1.135                                                        | 0.299                          | 2540.56            | 759.60             | 0.339                          | 1739.91            | 590.52             |
| A_68_P29664621 | chr14:64562219-64562263                           | NM_011446:-302          | Sox7          | PROMOTER               | 1.135                                                        | 0.319                          | 2187.32            | 696.97             | 0.362                          | 1585.99            | 573.76             |
| A_68_P28177063 | chr11:119161761-119161805                         | NM_138669:-425          | Eif4a3        | PROMOTER               | 1.135                                                        | 6.891                          | 3354.03            | 23112.34           | 7.818                          | 2858.45            | 22348.69           |
| A_68_P28078648 | chr11:102145969-102146013                         | NM_028076:-284          | Tmub2         | PROMOTER               | 1.135                                                        | 0.100                          | 5208.54            | 518.92             | 0.113                          | 3858.28            | 436.19             |
| A_68_P28033149 | chr11:94335822-94335866                           | NM_001112813:-332       | Cacna1g       | PROMOTER               | 1.135                                                        | 0.141                          | 4723.66            | 667.83             | 0.160                          | 3157.31            | 506.58             |
| A_68_P27543986 | chr10:128371189-128371233                         | NM_008398:342           | Itga7         | INSIDE                 | 1.135                                                        | 0.201                          | 2663.36            | 535.09             | 0.228                          | 1968.78            | 448.87             |
| A_68_P26467844 | chr9:44291603-44291647                            | ENSMUST00000136322:4764 |               | DOWNSTREAM             | 1.135                                                        | 0.239                          | 2604.80            | 623.45             | 0.272                          | 1852.48            | 503.37             |
| A_68_P24991222 | chr7:19651391-19651435                            | NM_001159671:11377      | Rsph6a        | INSIDE                 | 1.135                                                        | 0.497                          | 1720.52            | 855.83             | 0.565                          | 1279.38            | 722.42             |
| A_68_P23271159 | chr4:124613810-124613854                          | NM_026560:329           | Cdca8         | INSIDE                 | 1.135                                                        | 0.233                          | 2366.27            | 550.37             | 0.264                          | 1768.10            | 466.56             |
| A_68_P23196909 | chr4:108292640-108292684                          | NM_177045:102           | Cc2d1b        | INSIDE                 | 1.135                                                        | 0.419                          | 1109.55            | 465.37             | 0.476                          | 947.91             | 451.13             |
| A_68_P22340673 | chr3:94590302-94590346                            | NM_001037711:113        | Cgn           | INSIDE                 | 1.135                                                        | 0.253                          | 4514.55            | 1144.41            | 0.288                          | 3470.70            | 998.75             |
| A_68_P22185877 | chr3:61962834-61962878                            |                         |               | Unknown                | 1.135                                                        | 1.918                          | 386.73             | 741.56             | 2.176                          | 391.81             | 852.51             |
| A_68_P21833060 | chr2:166821691-166821735                          | NM_001109905:66         | Stau1         | INSIDE                 | 1.135                                                        | 0.446                          | 6844.94            | 3052.76            | 0.506                          | 4963.40            | 2512.36            |
| A_68_P21612948 | chr2:127188974-127189018                          | NM_009633:-25           | Adra2b        | PROMOTER               | 1.135                                                        | 0.378                          | 1323.23            | 500.19             | 0.429                          | 1031.68            | 442.74             |
| A_68_P30588542 | chr16:20622241-20622285                           | NM_028420:-911          | Camk2n2       | DIVERGENT_PROMOTER     | 1.134                                                        | 0.358                          | 1428.00            | 511.31             | 0.406                          | 1004.76            | 408.07             |
| A_68_P28835606 | chr13:13876193-13876237                           | NM_010317:-591          | Gng4          | PROMOTER               | 1.134                                                        | 1.474                          | 735.15             | 1083.28            | 1.671                          | 635.72             | 1062.17            |
| A_68_P27172917 | chr10:59649185-59649231                           | NM_016803:32800         | Chst3         | INSIDE                 | 1.134                                                        | 1.598                          | 991.22             | 1584.31            | 1.812                          | 705.29             | 1278.12            |
| A_68_P26164570 | chr8:113262638-113262682                          | NM_198625:17277         | Mtss1l        | INSIDE                 | 1.134                                                        | 2.065                          | 396.98             | 819.96             | 2.343                          | 420.34             | 984.68             |
| A_68_P25957634 | chr8:74108737-74108781                            | NM_011977:15933         | Sic27a1       | INSIDE                 | 1.134                                                        | 2.558                          | 766.62             | 1960.69            | 2.901                          | 576.09             | 1671.52            |
| A_68_P24248437 | chr6:13627972-13628016                            | NM_175312:-28           | B630005N14Rik | PROMOTER               | 1.134                                                        | 0.428                          | 2870.51            | 1229.05            | 0.486                          | 1980.71            | 961.76             |
| A_68_P32567036 | chrX:99266249-99266293                            | NM_183318:376           | Rgap4         | INSIDE                 | 1.133                                                        | 8.152                          | 2685.80            | 21895.36           | 9.237                          | 3174.52            | 29324.03           |
| A_68_P32229422 | chr19:61304541-61304585                           | NM_009970:-241          | Cstl2ra       | PROMOTER               | 1.133                                                        | 2.075                          | 1002.48            | 2080.34            | 2.350                          | 930.10             | 2186.19            |
| A_68_P31383664 | chr17:80942827-80942871                           | NM_001033443:20326      | cdkl4         | INSIDE                 | 1.133                                                        | 1.664                          | 1311.24            | 2182.34            | 1.886                          | 1026.28            | 1935.53            |
| A_68_P31097947 | chr17:24670396-24670440                           | NM_177375:274           | Rab26         | INSIDE                 | 1.133                                                        | 0.390                          | 1380.25            | 538.60             | 0.442                          | 1185.45            | 523.89             |
| A_68_P30361554 | chr15:78502409-78502453                           | NM_183141:46113         | Elfn1         | INSIDE                 | 1.133                                                        | 1.892                          | 841.45             | 1592.21            | 2.143                          | 659.46             | 1413.51            |
| A_68_P29193442 | chr13:85329134-85329178                           | NM_023243:75            | Ccnh          | INSIDE                 | 1.133                                                        | 2.611                          | 804.22             | 2099.59            | 2.959                          | 602.35             | 1782.44            |
| A_68_P28181984 | chr11:119908317-119908361                         | NM_001198787:-5243      | AatK          | PROMOTER               | 1.133                                                        | 1.679                          | 779.83             | 1309.13            | 1.902                          | 645.21             | 1227.02            |
| A_68_P28069996 | chr11:100621272-100621316                         | NM_001081194:-202       | Ccnh4         | PROMOTER               | 1.133                                                        | 5.363                          | 749.37             | 4019.15            | 6.077                          | 591.14             | 3592.26            |
| A_68_P27942518 | chr11:78114962-78115006                           | NM_017407:-108          | Spag5         | PROMOTER               | 1.133                                                        | 0.311                          | 1820.25            | 566.92             | 0.353                          | 1394.72            | 492.16             |
| A_68_P27643872 | chr11:22908277-22908321                           | NM_028672:-5088         | Fam161a       | PROMOTER               | 1.133                                                        | 0.559                          | 1516.49            | 848.16             | 0.634                          | 1226.73            | 777.23             |
| A_68_P27287710 | chr10:80610694-80610738                           | NM_010731:11701         | Zbtb7a        | INSIDE                 | 1.133                                                        | 4.081                          | 875.33             | 3572.04            | 4.624                          | 721.52             | 3336.04            |
| A_68_P27254397 | chr10:74524869-74524913                           | NM_001081412:1250       | Bcr           | INSIDE                 | 1.133                                                        | 0.398                          | 2802.76            | 1114.96            | 0.451                          | 2053.77            | 925.66             |
| A_68_P26170600 | chr8:114378284-114378328                          | NM_011801:-96           | Cfdp1         | PROMOTER               | 1.133                                                        | 0.346                          | 1415.98            | 489.62             | 0.392                          | 1147.97            | 449.59             |
| A_68_P25007068 | chr7:25669351-25669396                            | NM_023133:-359          | Rps19         | PROMOTER               | 1.133                                                        | 0.437                          | 2257.91            | 985.65             | 0.494                          | 1726.76            | 853.73             |
| A_68_P24990419 | chr7:19495688-19495732                            | NM_001033314:43         | Ccdc61        | INSIDE                 | 1.133                                                        | 0.397                          | 1406.84            | 558.82             | 0.450                          | 1130.94            | 509.04             |
| A_68_P23590586 | chr5:34037967-34038013                            | AK172441:87396          |               | INSIDE                 | 1.133                                                        | 3.447                          | 238.36             | 821.53             | 3.903                          | 177.52             | 692.94             |
| A_68_P23401332 | chr4:148961707-148961751                          | NM_023051:982           | Clstn1        | INSIDE                 | 1.133                                                        | 0.233                          | 2179.29            | 508.50             | 0.264                          | 1717.91            | 454.03             |
| A_68_P32775568 | chrX:156065624-156065668                          | NM_001135727:307        | Sh3kbp1       | INSIDE                 | 1.132                                                        | 1.436                          | 961.54             | 1381.12            | 1.625                          | 1169.90            | 1901.43            |
| A_68_P29578364 | chr14:47407974-47408018                           | NM_009919:36            | Cnih          | INSIDE                 | 1.132                                                        | 0.566                          | 3391.44            | 1919.19            | 0.641                          | 2521.86            | 1616.05            |
| A_68_P29446598 | chr14:21208189-21208233                           | NM_134081:-78           | Dnajc9        | PROMOTER               | 1.132                                                        | 2.163                          | 1179.76            | 2551.47            | 2.447                          | 990.82             | 2424.75            |
| A_68_P24449792 | chr6:52256062-52256106                            | NR_038163:8742          | 5730457N03Rik | DOWNSTREAM             | 1.132                                                        | 0.422                          | 1148.01            | 484.97             | 0.478                          | 926.36             | 442.81             |
| A_68_P22408056 | chr3:107499381-107499425                          | NM_145542:64            | Aheyl1        | INSIDE                 | 1.132                                                        | 2.920                          | 818.42             | 2390.11            | 3.307                          | 623.56             | 2061.82            |
| A_68_P20275804 | chr1:61685813-61685857                            | NM_001081050:437        | Pard3b        | INSIDE                 | 1.132                                                        | 1.465                          | 966.65             | 1416.20            | 1.658                          | 804.02             | 1332.96            |
| A_68_P31208325 | chr17:46817475-46817519                           | NM_001163729:383        | Klhdc3        | INSIDE                 | 1.131                                                        | 1.710                          | 1903.33            | 3254.53            | 1.934                          | 1099.27            | 2126.44            |
| A_68_P30345479 | chr15:75839800-75839844                           | NM_001168253:106        | Fam83h        | INSIDE                 | 1.131                                                        | 4.591                          | 1955.06            | 8975.36            | 5.194                          | 1581.01            | 8211.31            |
| A_68_P29645533 | chr14:61254039-61254083                           | NM_001033272:495        | Spata13       | INSIDE                 | 1.131                                                        | 0.540                          | 1756.49            | 949.37             | 0.611                          | 1299.49            | 794.36             |
| A_68_P29628537 | chr14:58161247-58161291                           | NM_145837:17603         | Il17d         | INSIDE                 | 1.131                                                        | 2.083                          | 967.13             | 2014.77            | 2.357                          | 870.32             | 2051.47            |
| A_68_P28457454 | chr12:57636900-57636944                           | NM_001146198:-829       | Nkx2-1        | PROMOTER               | 1.131                                                        | 0.188                          | 2685.57            | 506.02             | 0.213                          | 1944.00            | 414.16             |
| A_68_P22317892 | chr3:89018127-89018171                            | NM_001161824:109        | Mtx1          | INSIDE                 | 1.131                                                        | 0.377                          | 2144.98            | 808.73             | 0.426                          | 1678.55            | 715.50             |
| A_68_P29614877 | chr14:55513260-55513304                           | NM_019402:303           | Pabpn1        | INSIDE                 | 1.130                                                        | 12.911                         | 2184.23            | 28200.89           | 14.588                         | 1941.38            | 28320.05           |
| A_68_P28833519 | chr13:12742906-12742950                           | NR_003568:-266          | Gpr137b-ps    | PROMOTER               | 1.130                                                        | 0.124                          | 4730.26            | 584.94             | 0.140                          | 3522.12            | 492.26             |
| A_68_P28693443 | chr12:103981804-103981848                         | NM_001142937:44         | Moap1         | INSIDE                 | 1.130                                                        | 1.451                          | 961.69             | 1395.06            | 1.639                          | 705.36             | 1155.77            |
| A_68_P28202485 | chr12:4824209-4824253                             | NM_025323:-183          | 0610009D07Rik | PROMOTER               | 1.130                                                        | 0.269                          | 1926.48            | 517.93             | 0.304                          | 1523.54            | 462.81             |
| A_68_P28056292 | chr11:98274199-98274243                           | NM_001003817:423        | Erb2          | INSIDE                 | 1.130                                                        | 0.331                          | 1485.02            | 491.88             | 0.374                          | 1097.00            | 410.47             |
| A_68_P28013004 | chr11:90499848-90499892                           | NM_199008:373           | Cox11         | INSIDE                 | 1.130                                                        | 1.583                          | 965.69             | 1529.10            | 1.789                          | 797.38             | 1426.64            |
| A_68_P26239401 | chr8:125877966-125878010                          | NM_172287:21376         | Spire2        | INSIDE                 | 1.130                                                        | 2.572                          | 1174.72            | 3021.15            | 2.905                          | 871.73             | 2532.33            |
| A_68_P26164574 | chr8:113263014-113263058                          | NM_198625:17653         | Mtss1l        | INSIDE                 | 1.130                                                        | 2.610                          | 820.00             | 2140.46            | 2.950                          | 678.90             | 2002.68            |
| A_68_P26157753 | chr8:112089724-112089768                          | NM_175646:-139          | Txn14b        | DIVERGENT_PROMOTER     | 1.130                                                        | 0.343                          | 1269.52            | 434.82             | 0.387                          | 987.35             | 382.13             |
| A_68_P25481819 | chr7:130113409-130113453                          | NM_175023:-647          | Rbbp6         | PROMOTER               | 1.130                                                        | 1.703                          | 773.93             | 1317.87            | 1.924                          | 643.74             | 1238.32            |
| A_68_P24771970 | chr6:115551815-115551859                          | NM_023290:-119          | Mkrm2         | DIVERGENT_PROMOTER     | 1.130                                                        | 1.722                          | 688.75             | 1185.89            | 1.946                          | 593.38             | 1154.62            |
| A_68_P24639212 | chr6:91423890-91423934                            | NM_028766:168           | Tmem43        | INSIDE                 | 1.130                                                        | 0.486                          | 1146.39            | 557.43             | 0.549                          | 959.64             | 527.28             |

| ProbeName      | Target position of probe on CpG island microarray | TargetID                 | GeneSymbol    | CpG island Description | Ratio of relative methylation (TiO <sub>2</sub> -NP/Vehicle) | Sham group                     |                    |                    | TiO <sub>2</sub> -H group      |                    |                    |
|----------------|---------------------------------------------------|--------------------------|---------------|------------------------|--------------------------------------------------------------|--------------------------------|--------------------|--------------------|--------------------------------|--------------------|--------------------|
|                |                                                   |                          |               |                        |                                                              | Relative methylation (Cy5/Cy3) | Cy3 signal (Input) | Cy5 signal (MeDIP) | Relative methylation (Cy5/Cy3) | Cy3 signal (Input) | Cy5 signal (MeDIP) |
| A_68_P31131060 | chr17:30141259-30141303                           | NM_148926:-751           | Zfand3        | PROMOTER               | 1.129                                                        | 0.367                          | 1343.43            | 492.85             | 0.414                          | 1112.20            | 460.53             |
| A_68_P30547082 | chr16:11253796-11253840                           | NM_001130008:600         | Gspt1         | INSIDE                 | 1.129                                                        | 1.902                          | 1416.32            | 2694.16            | 2.147                          | 1146.29            | 2461.60            |
| A_68_P27990833 | chr11:86570909-86570954                           | NM_001003908:63          | Ctce          | INSIDE                 | 1.129                                                        | 0.239                          | 5458.58            | 1304.26            | 0.270                          | 3622.73            | 977.06             |
| A_68_P26766596 | chr9:99769415-99769459                            | NM_011440:-7153          | Sox14         | DOWNSTREAM             | 1.129                                                        | 0.407                          | 1264.73            | 514.37             | 0.459                          | 1002.28            | 460.38             |
| A_68_P26372145 | chr9:26541609-26541653                            | ENSMUST00000067362:195   |               | INSIDE                 | 1.129                                                        | 0.310                          | 2424.49            | 751.27             | 0.350                          | 1824.32            | 637.94             |
| A_68_P25599899 | chr7:150481613-150481657                          | NR_001461:818            | Kcnq1ot1      | INSIDE                 | 1.129                                                        | 1.513                          | 1226.62            | 1855.91            | 1.708                          | 1080.75            | 1846.26            |
| A_68_P24973911 | chr7:13556484-13556528                            | NM_178732:5294           | Zfp324        | INSIDE                 | 1.129                                                        | 3.742                          | 2699.19            | 10101.38           | 4.225                          | 2600.21            | 10986.28           |
| A_68_P24954288 | chr7:6106767-6106811                              | NM_001013012:785         | Zfp787        | INSIDE                 | 1.129                                                        | 1.458                          | 1876.27            | 2734.94            | 1.645                          | 1536.82            | 2528.77            |
| A_68_P24444427 | chr6:51419364-51419408                            | NM_016806:507            | Hmmpa2b1      | INSIDE                 | 1.129                                                        | 0.083                          | 8097.05            | 668.55             | 0.093                          | 5757.75            | 536.72             |
| A_68_P23362917 | chr4:140803601-140803645                          | NM_172520:4824           | Arhgef19      | INSIDE                 | 1.129                                                        | 0.422                          | 3145.49            | 1327.86            | 0.476                          | 2379.16            | 1133.51            |
| A_68_P22311001 | chr3:87775341-87775385                            | NM_016701:348            | Nes           | INSIDE                 | 1.129                                                        | 0.424                          | 1061.29            | 450.16             | 0.479                          | 810.47             | 388.17             |
| A_68_P20793719 | chr1:167212029-167212073                          |                          |               | Unknown                | 1.129                                                        | 0.392                          | 1357.57            | 532.28             | 0.443                          | 1202.87            | 532.51             |
| A_68_P31828825 | chr18:74129885-74129929                           | NM_172632:94697          | Mapk4         | INSIDE                 | 1.128                                                        | 1.547                          | 1007.15            | 1557.59            | 1.745                          | 809.73             | 1412.62            |
| A_68_P30349814 | chr15:76497752-76497796                           | NM_010630:6704           | Kifc2         | INSIDE                 | 1.128                                                        | 2.156                          | 837.87             | 1806.08            | 2.431                          | 667.90             | 1623.92            |
| A_68_P30328265 | chr15:72921187-72921231                           | NM_053068:367            | Khrac1        | INSIDE                 | 1.128                                                        | 0.545                          | 1515.33            | 826.00             | 0.615                          | 1174.51            | 722.00             |
| A_68_P30012297 | chr15:10644132-10644176                           | NM_030690:-859           | Rai14         | PROMOTER               | 1.128                                                        | 0.155                          | 3393.72            | 527.49             | 0.175                          | 2427.50            | 425.47             |
| A_68_P28161639 | chr11:116713577-116713621                         | NM_011358:810            | Srsf2         | INSIDE                 | 1.128                                                        | 0.291                          | 2680.67            | 781.01             | 0.329                          | 2025.35            | 665.36             |
| A_68_P28158435 | chr11:116142974-116143018                         | NM_010254:744            | Galr2         | INSIDE                 | 1.128                                                        | 0.317                          | 3004.84            | 951.05             | 0.357                          | 2071.76            | 739.68             |
| A_68_P28152793 | chr11:115184885-115184929                         | NM_176847:-1674          | Ush1g         | PROMOTER               | 1.128                                                        | 0.426                          | 1140.94            | 486.31             | 0.481                          | 821.92             | 395.03             |
| A_68_P27921684 | chr11:74463331-74463375                           | NM_001081158:356         | 1300001101Rik | INSIDE                 | 1.128                                                        | 2.536                          | 732.59             | 1857.59            | 2.859                          | 584.42             | 1671.03            |
| A_68_P27289149 | chr10:80827197-80827241                           | NM_001014836:1347        | 4930404N11Rik | INSIDE                 | 1.128                                                        | 0.311                          | 3181.51            | 989.96             | 0.351                          | 2362.47            | 829.42             |
| A_68_P27045328 | chr10:31328333-31328377                           | NM_001146349:1177        | Rn217         | INSIDE                 | 1.128                                                        | 1.650                          | 480.86             | 793.21             | 1.861                          | 516.90             | 961.95             |
| A_68_P25955964 | chr8:73796836-73796880                            | NM_001142322:246         | Myo9b         | INSIDE                 | 1.128                                                        | 0.256                          | 2740.32            | 701.96             | 0.289                          | 1978.92            | 571.76             |
| A_68_P25661492 | chr8:12431084-12431128                            | NR_027975:45336          | Gm5607        | INSIDE                 | 1.128                                                        | 0.307                          | 3487.80            | 1069.39            | 0.346                          | 2727.24            | 943.54             |
| A_68_P25586658 | chr7:148278423-148278467                          | NM_023059:8001           | Sigirr        | INSIDE                 | 1.128                                                        | 0.498                          | 3584.49            | 1785.61            | 0.562                          | 2632.31            | 1478.72            |
| A_68_P23575370 | chr5:31209922-31209966                            | NM_001134692:151         | Ost4          | INSIDE                 | 1.128                                                        | 0.111                          | 4332.62            | 479.70             | 0.125                          | 2641.69            | 330.03             |
| A_68_P21761443 | chr2:154438790-154438834                          | NM_199304:-291           | Zfp341        | DIVERGENT_PROMOTER     | 1.128                                                        | 0.377                          | 1454.20            | 446.37             | 0.346                          | 1147.69            | 397.53             |
| A_68_P21727917 | chr2:147872064-147872108                          | NM_010446:619            | Foxa2         | INSIDE                 | 1.128                                                        | 0.191                          | 3370.65            | 642.75             | 0.215                          | 2438.91            | 524.76             |
| A_68_P31227872 | chr17:50433503-50433507                           | NM_010021:-150           | Dazl          | PROMOTER               | 1.127                                                        | 1.454                          | 1204.17            | 1750.27            | 1.638                          | 909.61             | 1490.36            |
| A_68_P30988902 | chr16:95923853-95923897                           | NM_011809:-139           | Ets2          | PROMOTER               | 1.127                                                        | 0.464                          | 2650.34            | 1229.22            | 0.523                          | 2100.92            | 1097.86            |
| A_68_P27889186 | chr11:68213303-68213358                           | ENSMUST00000108674:995   |               | INSIDE                 | 1.127                                                        | 0.474                          | 1843.92            | 874.76             | 0.535                          | 1142.96            | 611.33             |
| A_68_P27257832 | chr10:75129986-75130030                           | NM_172549:97094          | Cabin1        | INSIDE                 | 1.127                                                        | 0.320                          | 2032.34            | 649.86             | 0.360                          | 1327.70            | 478.50             |
| A_68_P27176097 | chr10:60149838-60149882                           | NM_023370:9378           | Cdh23         | INSIDE                 | 1.127                                                        | 0.489                          | 1524.79            | 746.03             | 0.551                          | 1045.11            | 576.22             |
| A_68_P25957676 | chr8:74116134-74116178                            | NM_025396:74             | Pgls          | INSIDE                 | 1.127                                                        | 2.167                          | 374.49             | 811.44             | 2.442                          | 307.64             | 751.35             |
| A_68_P21909038 | chr2:180922669-180922713                          | NM_025598:643            | Pdpd1f        | INSIDE                 | 1.127                                                        | 0.305                          | 1736.62            | 529.89             | 0.344                          | 1263.98            | 434.55             |
| A_68_P21906900 | chr2:180627890-180627934                          | NR_029538:-832           | Mir124a-3     | PROMOTER               | 1.127                                                        | 0.204                          | 3246.69            | 662.22             | 0.230                          | 2284.00            | 525.15             |
| A_68_P21421467 | chr2:91077045-91077089                            | NM_028119:157            | Ddb2          | INSIDE                 | 1.127                                                        | 0.330                          | 2738.04            | 904.40             | 0.372                          | 1962.56            | 730.73             |
| A_68_P21078344 | chr2:26245012-26245056                            | NM_173180:167            | Pmpca         | INSIDE                 | 1.127                                                        | 0.166                          | 3408.65            | 566.10             | 0.187                          | 2299.93            | 430.48             |
| A_68_P32785479 | chrX:158155132-158155176                          | NM_198409:330            | Rai2          | PROMOTER               | 1.126                                                        | 1.564                          | 1129.16            | 1766.33            | 1.761                          | 1400.44            | 2466.66            |
| A_68_P32774623 | chrX:155853132-155853176                          | NM_001081124:645         | Mtap7d2       | INSIDE                 | 1.126                                                        | 0.612                          | 2442.59            | 1495.35            | 0.690                          | 3255.88            | 2245.16            |
| A_68_P31464038 | chr18:4635009-4635053                             | NM_001081963:104         | 9430020K01Rik | INSIDE                 | 1.126                                                        | 0.220                          | 3367.86            | 739.27             | 0.247                          | 2415.32            | 597.14             |
| A_68_P31167786 | chr17:37334030-37334074                           | NM_001011518:859         | Olfr94        | INSIDE                 | 1.126                                                        | 0.429                          | 1511.48            | 648.89             | 0.484                          | 1120.23            | 541.74             |
| A_68_P30481816 | chr15:99532450-99532494                           | NM_031842:-245           | Smardc1       | PROMOTER               | 1.126                                                        | 0.358                          | 1223.57            | 437.62             | 0.403                          | 1059.11            | 426.67             |
| A_68_P30421913 | chr15:88721305-88721349                           | ENSMUST00000172019:63522 |               | INSIDE                 | 1.126                                                        | 0.279                          | 4362.64            | 1216.78            | 0.314                          | 3054.68            | 959.00             |
| A_68_P28194541 | chr12:3309848-3309892                             | NM_016676:99             | Rab10         | INSIDE                 | 1.126                                                        | 0.243                          | 2243.94            | 545.73             | 0.274                          | 1685.62            | 461.46             |
| A_68_P28159935 | chr11:116403194-116403238                         | NM_173755:39545          | Ube2o         | INSIDE                 | 1.126                                                        | 1.884                          | 1223.43            | 2305.15            | 2.121                          | 941.47             | 1996.88            |
| A_68_P27913316 | chr11:72608989-72609033                           | NM_001024926:331         | Cyb5d2        | INSIDE                 | 1.126                                                        | 0.392                          | 1839.39            | 721.40             | 0.442                          | 1391.52            | 614.68             |
| A_68_P27282554 | chr10:79798280-79798324                           | NM_001204931:5413        | Reep6         | INSIDE                 | 1.126                                                        | 2.120                          | 868.15             | 1840.71            | 2.387                          | 730.16             | 1742.71            |
| A_68_P26920086 | chr10:7382947-7382991                             | NR_030698:-200           | A630066F11Rik | PROMOTER               | 1.126                                                        | 0.481                          | 5185.52            | 2495.51            | 0.542                          | 3553.23            | 1924.70            |
| A_68_P25957071 | chr8:74009830-74009874                            | NM_001164679:114         | Ano8          | INSIDE                 | 1.126                                                        | 0.464                          | 2077.95            | 963.76             | 0.522                          | 1636.75            | 854.55             |
| A_68_P25023220 | chr7:29501806-29501850                            | NM_015796:20             | Fbxo17        | INSIDE                 | 1.126                                                        | 0.555                          | 1854.77            | 1030.09            | 0.625                          | 1505.72            | 941.32             |
| A_68_P21420490 | chr2:90910289-90910333                            | NM_026721:68             | Slc39a13      | INSIDE                 | 1.126                                                        | 1.399                          | 2630.86            | 3680.82            | 1.575                          | 2056.30            | 3239.43            |
| A_68_P21077040 | chr2:26061806-26061850                            | NM_001039653:248         | Lhx3          | INSIDE                 | 1.126                                                        | 0.440                          | 1366.93            | 601.64             | 0.496                          | 994.94             | 493.07             |
| A_68_P20599491 | chr1:130140934-130140978                          | NM_026390:199            | Ubxn4         | INSIDE                 | 1.126                                                        | 0.368                          | 2450.27            | 901.14             | 0.414                          | 1838.74            | 761.58             |
| A_68_P32111332 | chr19:40906336-40906380                           | NM_172839:590            | Ccnj          | INSIDE                 | 1.125                                                        | 0.610                          | 3868.34            | 2358.27            | 0.686                          | 2932.59            | 2010.74            |
| A_68_P31112704 | chr17:26975881-26975926                           | NM_008700:2607           | Nkx2-5        | INSIDE                 | 1.125                                                        | 0.222                          | 3083.57            | 686.05             | 0.250                          | 2359.01            | 590.63             |
| A_68_P30621545 | chr16:26581869-26581913                           | NM_134103:100            | Il1rap        | INSIDE                 | 1.125                                                        | 0.336                          | 1775.86            | 596.17             | 0.378                          | 1435.28            | 542.18             |
| A_68_P30339172 | chr15:74551721-74551765                           | NM_198607:79             | 4930572J05Rik | INSIDE                 | 1.125                                                        | 0.514                          | 1700.41            | 873.40             | 0.578                          | 1480.77            | 855.41             |
| A_68_P29694908 | chr14:69809045-69809089                           | NM_010921:318            | Nkx3-1        | INSIDE                 | 1.125                                                        | 0.481                          | 1363.19            | 655.42             | 0.541                          | 949.42             | 513.47             |
| A_68_P28198045 | chr12:3981964-3982008                             | NM_001082483:56929       | Efr3b         | INSIDE                 | 1.125                                                        | 0.248                          | 4043.17            | 1001.92            | 0.279                          | 2760.04            | 769.47             |
| A_68_P28056086 | chr11:98245656-98245700                           | NM_011540:554            | Tcap          | INSIDE                 | 1.125                                                        | 1.838                          | 1059.97            | 1948.35            | 2.068                          | 896.40             | 1853.43            |
| A_68_P27894948 | chr11:69224589-69224633                           | NM_001017426:2567        | Kdm6b         | INSIDE                 | 1.125                                                        | 0.506                          | 2175.74            | 1101.52            | 0.569                          | 1399.96            | 797.23             |
| A_68_P27541017 | chr10:127814266-127814310                         | NM_172790:109            | Ankrd52       | INSIDE                 | 1.125                                                        | 0.312                          | 1450.45            | 452.13             | 0.351                          | 1055.35            | 370.15             |
| A_68_P26612674 | chr9:69607679-69607723                            | NM_022378:1047           | Foxb1         | INSIDE                 | 1.125                                                        | 1.989                          | 390.65             | 776.99             | 2.237                          | 314.04             | 702.46             |
| A_68_P25020985 | chr7:29075914-29075958                            | NM_175033:217            | BC089491      | INSIDE                 | 1.125                                                        | 0.354                          | 4981.21            | 1765.49            | 0.399                          | 3443.66            | 1372.73            |

| ProbeName      | Target position of probe on CpG island microarray | TargetID              | GeneSymbol    | CpG island Description | Ratio of relative methylation (TiO <sub>2</sub> -NP/Vehicle) | Sham group                     |                    |                    | TiO <sub>2</sub> -H group      |                    |                    |
|----------------|---------------------------------------------------|-----------------------|---------------|------------------------|--------------------------------------------------------------|--------------------------------|--------------------|--------------------|--------------------------------|--------------------|--------------------|
|                |                                                   |                       |               |                        |                                                              | Relative methylation (Cy5/Cy3) | Cy3 signal (Input) | Cy5 signal (MeDIP) | Relative methylation (Cy5/Cy3) | Cy3 signal (Input) | Cy5 signal (MeDIP) |
| A_68_P24633501 | chr6:90555093-90555137                            | NM_027868:241         | Slc41a3       | INSIDE                 | 1.125                                                        | 0.341                          | 4539.89            | 1548.52            | 0.384                          | 3360.64            | 1289.13            |
| A_68_P24449405 | chr6:52196592-52196638                            | NM_010450:848         | Hoxa11        | PROMOTER               | 1.125                                                        | 2.649                          | 252.47             | 668.78             | 2.979                          | 192.18             | 572.48             |
| A_68_P24159893 | chr5:144952289-144952338                          | NM_010800:1159        | Bhlha15       | INSIDE                 | 1.125                                                        | 2.882                          | 608.89             | 1754.55            | 3.243                          | 487.84             | 1581.96            |
| A_68_P23230003 | chr4:116269931-116269975                          | NR_029450:283         | C530005A16Rik | INSIDE                 | 1.125                                                        | 0.412                          | 1712.52            | 705.70             | 0.463                          | 1220.31            | 565.51             |
| A_68_P21907443 | chr2:180701912-180701956                          | NM_001177706:-70      | Arfgap1       | PROMOTER               | 1.125                                                        | 0.416                          | 1181.49            | 492.06             | 0.469                          | 1011.45            | 473.88             |
| A_68_P32217859 | chr19:59268751-59268795                           |                       |               | Unknown                | 1.124                                                        | 0.318                          | 1653.58            | 526.05             | 0.358                          | 1236.71            | 442.24             |
| A_68_P31482454 | chr18:8694075-8694120                             | ENSMUST00000171469:23 |               | INSIDE                 | 1.124                                                        | 0.389                          | 1875.26            | 729.07             | 0.437                          | 1272.44            | 555.83             |
| A_68_P30463768 | chr15:96290631-96290675                           | NM_028148:622         | Scaf11        | INSIDE                 | 1.124                                                        | 0.329                          | 1407.62            | 463.55             | 0.370                          | 986.00             | 365.13             |
| A_68_P29699037 | chr14:70479901-70479945                           | NM_018781:2671        | Egr3          | INSIDE                 | 1.124                                                        | 3.920                          | 1088.92            | 4268.18            | 4.407                          | 930.42             | 4100.04            |
| A_68_P27926564 | chr11:75329061-75329105                           | NM_001004157:2040     | Scarf1        | INSIDE                 | 1.124                                                        | 1.900                          | 1090.85            | 2072.42            | 2.136                          | 809.80             | 1729.87            |
| A_68_P26742255 | chr9:95412044-95412088                            | NM_001114977:349      | 2610101N10Rik | INSIDE                 | 1.124                                                        | 0.463                          | 1582.99            | 732.31             | 0.520                          | 1382.94            | 718.85             |
| A_68_P26587470 | chr9:65246468-65246513                            | NM_001033158:196      | Ras12         | INSIDE                 | 1.124                                                        | 1.369                          | 1457.12            | 1994.93            | 1.539                          | 1137.98            | 1751.38            |
| A_68_P24995609 | chr7:20443379-20443423                            | NM_001033419:3248     | Secam16       | INSIDE                 | 1.124                                                        | 1.608                          | 866.27             | 1392.65            | 1.807                          | 720.28             | 1301.88            |
| A_68_P23929476 | chr5:100844949-100844993                          | NM_026969:283         | Sec31a        | INSIDE                 | 1.124                                                        | 1.836                          | 921.25             | 1691.42            | 2.064                          | 771.13             | 1591.61            |
| A_68_P22009787 | chr3:27081688-27081732                            | NM_178772:-215        | Nceh1         | PROMOTER               | 1.124                                                        | 0.389                          | 2098.37            | 816.81             | 0.437                          | 1541.93            | 674.51             |
| A_68_P31939559 | chr19:7457501-7457545                             | NM_001033139:-6       | Al846148      | PROMOTER               | 1.123                                                        | 0.427                          | 2111.89            | 901.99             | 0.480                          | 1496.41            | 717.98             |
| A_68_P31921019 | chr19:4097126-4097170                             | NM_026373:-202        | Cdk2ap2       | PROMOTER               | 1.123                                                        | 0.321                          | 2481.81            | 797.33             | 0.361                          | 1916.80            | 691.51             |
| A_68_P31677778 | chr18:46756824-46756868                           | NM_025698:343         | Tmed7         | INSIDE                 | 1.123                                                        | 2.791                          | 730.15             | 2037.69            | 3.134                          | 580.92             | 1820.56            |
| A_68_P31301690 | chr17:65963450-65963494                           | NM_013933:-577        | Vapa          | PROMOTER               | 1.123                                                        | 8.841                          | 1068.28            | 9445.11            | 9.926                          | 938.61             | 9316.25            |
| A_68_P31058441 | chr17:14340236-14340280                           | NM_172826:580         | Dact2         | INSIDE                 | 1.123                                                        | 0.370                          | 1501.35            | 555.62             | 0.416                          | 1262.27            | 524.56             |
| A_68_P26086063 | chr8:98475827-98475871                            |                       |               | Unknown                | 1.123                                                        | 1.354                          | 1668.51            | 2259.36            | 1.521                          | 1463.00            | 2225.48            |
| A_68_P25844871 | chr8:49075873-49075917                            | NM_133791:11          | Wwc2          | INSIDE                 | 1.123                                                        | 1.833                          | 968.02             | 1774.16            | 2.058                          | 847.06             | 1743.40            |
| A_68_P25598468 | chr7:150255797-150255841                          | NM_001115085:546      | Tssc4         | INSIDE                 | 1.123                                                        | 0.198                          | 5312.63            | 1050.27            | 0.222                          | 3363.42            | 746.39             |
| A_68_P24126243 | chr5:137972158-137972202                          | NM_010312:2277        | Gnb2          | INSIDE                 | 1.123                                                        | 0.414                          | 2555.20            | 1058.12            | 0.465                          | 1788.47            | 831.56             |
| A_68_P23254532 | chr4:120689345-120689392                          | NM_133716:484         | Smap2         | INSIDE                 | 1.123                                                        | 0.216                          | 2105.68            | 455.51             | 0.243                          | 1423.06            | 345.60             |
| A_68_P22071592 | chr3:38784302-38784349                            | NM_183221:-1536       | Fat4          | PROMOTER               | 1.123                                                        | 0.519                          | 2246.13            | 1165.50            | 0.583                          | 1631.84            | 950.83             |
| A_68_P29330802 | chr13:112598180-112598224                         | NM_011945:989         | Map3k1        | INSIDE                 | 1.122                                                        | 2.293                          | 1470.35            | 3372.16            | 2.573                          | 1189.17            | 3059.27            |
| A_68_P29288685 | chr13:104899639-104899683                         | NM_029447:34          | Nln           | INSIDE                 | 1.122                                                        | 0.159                          | 4003.46            | 636.94             | 0.179                          | 3055.13            | 545.38             |
| A_68_P26948442 | chr10:12684445-12684489                           | NM_001163590:-401     | Stx11         | PROMOTER               | 1.122                                                        | 0.279                          | 1868.80            | 522.05             | 0.313                          | 1504.52            | 471.51             |
| A_68_P23341302 | chr4:137237494-137237538                          | NM_001081155:-101     | Rap1gap       | PROMOTER               | 1.122                                                        | 0.458                          | 2073.72            | 950.44             | 0.514                          | 1698.15            | 873.65             |
| A_68_P21833422 | chr2:166888209-166888253                          | NM_001081005:-203     | 1500012F01Rik | PROMOTER               | 1.122                                                        | 2.687                          | 630.48             | 1694.39            | 3.016                          | 591.17             | 1782.93            |
| A_68_P20799612 | chr1:168239545-168239589                          | NM_001164528:55297    | Ildt2         | INSIDE                 | 1.122                                                        | 0.539                          | 1375.81            | 741.48             | 0.605                          | 1147.87            | 694.14             |
| A_68_P20770874 | chr1:163181125-163181169                          | NM_007453:151         | Prdx6         | INSIDE                 | 1.122                                                        | 0.290                          | 1516.43            | 440.23             | 0.326                          | 1184.97            | 386.05             |
| A_68_P32700071 | chrX:137134752-137134796                          | NM_001077364:287      | Tsc22d3       | INSIDE                 | 1.121                                                        | 2.608                          | 3579.24            | 9335.49            | 2.924                          | 4290.32            | 12542.95           |
| A_68_P30346595 | chr15:76009519-76009563                           | NM_201394:16600       | Plec          | INSIDE                 | 1.121                                                        | 3.342                          | 1106.65            | 3698.51            | 3.746                          | 908.93             | 3404.66            |
| A_68_P27325553 | chr10:87922455-87922499                           | NM_011517:145         | Sycp3         | INSIDE                 | 1.121                                                        | 2.650                          | 916.13             | 2427.51            | 2.970                          | 714.83             | 2123.24            |
| A_68_P25827401 | chr8:46036029-46036073                            | NM_001081286:489      | Fat1          | INSIDE                 | 1.121                                                        | 1.525                          | 1445.33            | 2203.55            | 1.709                          | 1105.28            | 1889.01            |
| A_68_P25737279 | chr8:28338376-28338420                            | NM_013462:1662        | Adrb3         | INSIDE                 | 1.121                                                        | 0.480                          | 4070.88            | 1953.86            | 0.538                          | 2898.19            | 1559.17            |
| A_68_P25661263 | chr8:12397648-12397692                            | NM_009233:2152        | Sox1          | INSIDE                 | 1.121                                                        | 0.538                          | 1331.16            | 716.76             | 0.604                          | 1080.53            | 652.39             |
| A_68_P25276880 | chr7:89484688-89484732                            | NM_001190374:507      | Adamts13      | INSIDE                 | 1.121                                                        | 0.351                          | 3063.74            | 1075.47            | 0.393                          | 2204.86            | 867.57             |
| A_68_P21901918 | chr2:179906691-179906735                          | NM_019822:420         | Adm1          | INSIDE                 | 1.121                                                        | 0.445                          | 1738.90            | 773.23             | 0.499                          | 1460.38            | 728.27             |
| A_68_P30094307 | chr15:27677421-27677465                           | NM_001081302:278161   | Trio          | INSIDE                 | 1.120                                                        | 2.937                          | 3436.95            | 10093.05           | 3.289                          | 2318.21            | 7623.58            |
| A_68_P29055222 | chr13:55573097-55573141                           | NM_001030296:7491     | Prr7          | INSIDE                 | 1.120                                                        | 1.482                          | 725.21             | 1074.47            | 1.660                          | 709.63             | 1177.87            |
| A_68_P28958208 | chr13:38129074-38129118                           | NM_024242:239         | Riok1         | INSIDE                 | 1.120                                                        | 0.150                          | 3616.82            | 541.41             | 0.168                          | 2551.20            | 427.64             |
| A_68_P27551372 | chr11:3231986-3232030                             | NM_178149:1275        | Pik3ip1       | INSIDE                 | 1.120                                                        | 1.414                          | 1000.32            | 1414.73            | 1.584                          | 770.16             | 1219.62            |
| A_68_P26891191 | chr9:122656494-122656538                          | NM_001199736:53       | Gm9524        | INSIDE                 | 1.120                                                        | 2.157                          | 1214.10            | 2618.44            | 2.415                          | 943.30             | 2278.32            |
| A_68_P26458363 | chr9:42705778-42705822                            | NM_175481:46654       | Grik4         | INSIDE                 | 1.120                                                        | 0.138                          | 6076.86            | 837.51             | 0.154                          | 3910.35            | 603.67             |
| A_68_P25478245 | chr7:129433344-129433388                          | NM_008855:728         | Prkeb         | INSIDE                 | 1.120                                                        | 0.269                          | 1959.32            | 527.76             | 0.302                          | 1483.20            | 447.36             |
| A_68_P25032390 | chr7:31373515-31373559                            | NM_029274:209         | Wbp7          | INSIDE                 | 1.120                                                        | 1.399                          | 1458.40            | 2040.30            | 1.567                          | 1246.80            | 1953.12            |
| A_68_P24804564 | chr6:121423714-121423758                          | NM_001033354:-40      | Iqsec3        | PROMOTER               | 1.120                                                        | 3.897                          | 2016.96            | 7859.52            | 4.362                          | 1444.40            | 6301.03            |
| A_68_P24333874 | chr6:30688204-30688248                            | NR_029900:-3072       | Mir335        | PROMOTER               | 1.120                                                        | 2.843                          | 510.11             | 1450.42            | 3.185                          | 426.95             | 1359.84            |
| A_68_P24040307 | chr5:121144585-121144629                          | NM_008052:17072       | Dtx1          | INSIDE                 | 1.120                                                        | 2.089                          | 648.67             | 1354.98            | 2.340                          | 525.84             | 1230.47            |
| A_68_P22049393 | chr3:34549575-34549619                            | NM_011443:670         | Sox2          | INSIDE                 | 1.120                                                        | 0.299                          | 1851.13            | 553.34             | 0.335                          | 1447.35            | 484.49             |
| A_68_P21635428 | chr2:131346491-131346535                          | NM_001177833:28915    | Smox          | INSIDE                 | 1.120                                                        | 1.425                          | 1910.33            | 2722.53            | 1.597                          | 1577.16            | 2518.46            |
| A_68_P33003690 | chr1_random:342987-343031                         | NM_177389:-95         | Mia3          | PROMOTER               | 1.119                                                        | 0.292                          | 3553.61            | 1037.14            | 0.327                          | 2721.40            | 888.59             |
| A_68_P32461571 | chrX:70473910-70473954                            | NM_007978:288         | F8a           | INSIDE                 | 1.119                                                        | 2.440                          | 511.51             | 1248.03            | 2.730                          | 673.63             | 1839.14            |
| A_68_P32053973 | chr19:29700840-29700884                           | NM_001081213:22048    | Ermp1         | INSIDE                 | 1.119                                                        | 1.711                          | 5846.27            | 10001.11           | 1.913                          | 3894.49            | 7451.76            |
| A_68_P30512788 | chr16:4939417-4939461                             | NR_037666:147         | LOC100503704  | INSIDE                 | 1.119                                                        | 0.246                          | 3730.97            | 916.14             | 0.275                          | 2535.45            | 696.48             |
| A_68_P29716895 | chr14:73725625-73725669                           | NM_009029:-48         | Rb1           | PROMOTER               | 1.119                                                        | 3.136                          | 279.15             | 875.31             | 3.508                          | 202.65             | 710.92             |
| A_68_P27280127 | chr10:79440093-79440137                           | NM_001003949:6961     | ORF61         | INSIDE                 | 1.119                                                        | 2.312                          | 871.16             | 2014.30            | 2.587                          | 758.16             | 1961.47            |
| A_68_P27176094 | chr10:60149519-60149563                           | NM_023370:9698        | Cdh23         | INSIDE                 | 1.119                                                        | 0.380                          | 2536.31            | 962.91             | 0.425                          | 1801.08            | 765.07             |
| A_68_P26467960 | chr9:44306562-44306606                            | NM_030256:-634        | Bcl9l         | PROMOTER               | 1.119                                                        | 0.387                          | 2909.15            | 1124.52            | 0.433                          | 1989.93            | 860.96             |
| A_68_P25782095 | chr8:36889705-36889749                            | NM_027998:-113        | Cldn23        | PROMOTER               | 1.119                                                        | 0.194                          | 5341.53            | 1034.02            | 0.217                          | 4010.58            | 868.74             |
| A_68_P23702721 | chr5:54200945-54200989                            | NM_144517:101         | Tbcl1d19      | INSIDE                 | 1.119                                                        | 0.621                          | 2420.68            | 1503.35            | 0.695                          | 1800.50            | 1250.92            |
| A_68_P21144177 | chr2:37648771-37648815                            | NM_001163566:17024    | Crb2          | INSIDE                 | 1.119                                                        | 1.866                          | 1140.08            | 2127.17            | 2.089                          | 981.62             | 2050.14            |

| ProbeName       | Target position of probe on CpG island microarray | TargetID                | GeneSymbol     | CpG island Description | Ratio of relative methylation (TiO <sub>2</sub> -NP/Vehicle) | Sham group                     |                    |                    | TiO <sub>2</sub> -H group      |                    |                    |
|-----------------|---------------------------------------------------|-------------------------|----------------|------------------------|--------------------------------------------------------------|--------------------------------|--------------------|--------------------|--------------------------------|--------------------|--------------------|
|                 |                                                   |                         |                |                        |                                                              | Relative methylation (Cy5/Cy3) | Cy3 signal (Input) | Cy5 signal (MeDIP) | Relative methylation (Cy5/Cy3) | Cy3 signal (Input) | Cy5 signal (MeDIP) |
| A_68_P32241972  | chrX:722879-722923                                | NM_016809:28            | Rbm3           | INSIDE                 | 1.118                                                        | 1.411                          | 1302.58            | 1838.39            | 1.577                          | 1667.17            | 2629.45            |
| A_68_P1928721   | chr19:5447928-5447972                             | NM_010235:253           | Fosl1          | INSIDE                 | 1.118                                                        | 0.257                          | 2359.61            | 606.72             | 0.287                          | 1704.65            | 490.03             |
| A_68_P29747596  | chr14:79132794-79132838                           | NM_001081336:-7920      | Dgkh           | PROMOTER               | 1.118                                                        | 0.232                          | 3359.88            | 778.28             | 0.259                          | 2257.77            | 584.68             |
| A_68_P28675862  | chr12:100630292-100630340                         | NM_183186:57968         | Foxn3          | INSIDE                 | 1.118                                                        | 2.573                          | 306.88             | 789.70             | 2.877                          | 261.15             | 751.20             |
| A_68_P28183958  | chr11:120209420-120209464                         | NM_009609:356           | Actg1          | INSIDE                 | 1.118                                                        | 1.426                          | 1276.10            | 1819.17            | 1.593                          | 1009.20            | 1607.74            |
| A_68_P26494988  | chr9:48793866-48793910                            | NM_175482:399           | Usp28          | INSIDE                 | 1.118                                                        | 0.289                          | 2683.53            | 774.29             | 0.322                          | 2027.14            | 653.67             |
| A_68_P26468514  | chr9:44413289-44413333                            | NM_001110826:336        | Ddx6           | INSIDE                 | 1.118                                                        | 0.415                          | 2971.88            | 1233.98            | 0.464                          | 2436.58            | 1130.94            |
| A_68_P26153174  | chr8:111324296-111324340                          | NM_007496:85775         | Zfhx3          | INSIDE                 | 1.118                                                        | 1.455                          | 1375.33            | 2000.89            | 1.627                          | 1105.88            | 1799.18            |
| A_68_P24605101  | chr6:85402012-85402056                            | NR_028081:-70           | 1700040103Rik  | PROMOTER               | 1.118                                                        | 0.394                          | 1213.29            | 477.70             | 0.440                          | 1018.03            | 448.26             |
| A_68_P23410166  | chr4:150482290-150482334                          | NM_001081557:753565     | Camta1         | INSIDE                 | 1.118                                                        | 0.140                          | 6499.62            | 912.61             | 0.157                          | 4637.77            | 727.76             |
| A_68_P23349525  | chr4:138630261-138630305                          | NM_021358:422           | Htr6           | INSIDE                 | 1.118                                                        | 0.424                          | 1774.39            | 752.37             | 0.474                          | 1335.43            | 633.12             |
| A_68_P21071713  | chr2:25228424-25228468                            | NM_001081085:606        | 21010317E24Rik | INSIDE                 | 1.118                                                        | 2.792                          | 606.66             | 1693.61            | 3.121                          | 536.67             | 1675.11            |
| A_68_P20842597  | chr1:176433418-176433462                          | NM_019445:1485          | Fmn2           | INSIDE                 | 1.118                                                        | 0.327                          | 2411.95            | 789.30             | 0.366                          | 1603.87            | 587.04             |
| A_68_P32603677  | chrX:109714158-109714202                          | NM_177747:46            | Zfp711         | INSIDE                 | 1.117                                                        | 2.329                          | 316.32             | 736.87             | 2.602                          | 438.23             | 1140.35            |
| A_68_P32465797  | chrX:71212951-71212995                            | NM_008224:-1318         | Hcfcl          | PROMOTER               | 1.117                                                        | 0.516                          | 1491.43            | 770.29             | 0.577                          | 2001.07            | 1154.75            |
| A_68_P32134819  | chr19:44911268-44911312                           | NM_011037:79407         | Pax2           | INSIDE                 | 1.117                                                        | 0.466                          | 1415.44            | 659.86             | 0.521                          | 1201.67            | 625.63             |
| A_68_P29244711  | chr13:96901122-96901166                           | NM_029210:1388          | Sv2c           | INSIDE                 | 1.117                                                        | 1.507                          | 2586.25            | 3897.85            | 1.684                          | 2113.39            | 3558.19            |
| A_68_P27992593  | chr11:86922410-86922454                           | NM_175563:-216          | Prr11          | DIVERGENT_PROMOTER     | 1.117                                                        | 0.158                          | 3908.32            | 616.99             | 0.176                          | 2649.50            | 467.19             |
| A_68_P26574085  | chr9:62990414-62990458                            | NM_172446:4351          | Skor1          | INSIDE                 | 1.117                                                        | 0.159                          | 4163.22            | 660.00             | 0.177                          | 2802.95            | 496.21             |
| A_68_P25065936  | chr7:390006581-39006625                           | NM_024413:6411          | Plekhl1        | INSIDE                 | 1.117                                                        | 2.018                          | 2672.72            | 5393.44            | 2.255                          | 1940.76            | 4375.92            |
| A_68_P24113930  | chr5:135408345-135408389                          | NM_024479:124           | Wbscr27        | INSIDE                 | 1.117                                                        | 0.281                          | 2441.35            | 685.05             | 0.313                          | 1794.06            | 562.31             |
| A_68_P23231032  | chr4:116480068-116480112                          | NM_026654:74            | Toe1           | INSIDE                 | 1.117                                                        | 0.354                          | 1813.52            | 642.01             | 0.395                          | 1214.92            | 480.45             |
| A_68_P22907354  | chr4:49858702-49858746                            | NM_001033351:-771       | Grin3a         | PROMOTER               | 1.117                                                        | 0.375                          | 1699.78            | 637.65             | 0.419                          | 1278.64            | 536.01             |
| A_68_P20354207  | chr1:75455478-75455422                            | NM_183022:8316          | Accn4          | INSIDE                 | 1.117                                                        | 1.582                          | 611.50             | 967.25             | 1.767                          | 569.08             | 1005.45            |
| A_68_P20319175  | chr1:69424592-69424636                            |                         |                | Unknown                | 1.117                                                        | 1.669                          | 1331.20            | 2221.54            | 1.865                          | 1132.14            | 2111.24            |
| A_68_P32561247  | chrX:97972457-97972501                            | NM_001177780:-131       | Dlg3           | PROMOTER               | 1.116                                                        | 2.442                          | 416.06             | 1016.18            | 2.726                          | 502.75             | 1370.72            |
| A_68_P31918873  | chr19:3708527-3708572                             | NM_028077:217           | 1810055G02Rik  | INSIDE                 | 1.116                                                        | 0.158                          | 9798.04            | 1552.42            | 0.177                          | 6208.52            | 1098.21            |
| A_68_P23407012  | chr4:149943746-149943790                          | NM_001085492:287744     | Rere           | INSIDE                 | 1.116                                                        | 1.943                          | 585.32             | 1137.12            | 2.168                          | 480.25             | 1041.34            |
| A_68_P233225610 | chr4:134487232-134487276                          | NM_026780:360           | Syl2           | INSIDE                 | 1.116                                                        | 30.434                         | 7436.08            | 226310.00          | 33.962                         | 7074.44            | 240260.20          |
| A_68_P22856642  | chr4:40226159-40226203                            | NM_001033305:221        | Ndubf6         | INSIDE                 | 1.116                                                        | 0.296                          | 1976.44            | 584.46             | 0.330                          | 1490.86            | 492.00             |
| A_68_P22200389  | chr3:65332655-65332699                            | NM_178892:308           | Tiparp         | INSIDE                 | 1.116                                                        | 0.363                          | 2144.42            | 778.70             | 0.405                          | 1698.37            | 688.48             |
| A_68_P22030511  | chr3:30755072-30755116                            | NM_001134385:223        | Gpr160         | INSIDE                 | 1.116                                                        | 4.162                          | 959.83             | 3995.28            | 4.644                          | 841.86             | 3909.34            |
| A_68_P21820675  | chr2:164774897-164774941                          | NM_013599:1168          | Mmp9           | INSIDE                 | 1.116                                                        | 0.213                          | 2121.46            | 451.37             | 0.237                          | 1500.04            | 356.16             |
| A_68_P21114429  | chr2:32143411-32143455                            | NM_175190:156           | 2900010J23Rik  | INSIDE                 | 1.116                                                        | 0.498                          | 2156.76            | 1074.94            | 0.556                          | 1717.54            | 955.66             |
| A_68_P20644038  | chr1:138028419-138028463                          | NM_001039472:463        | Kif21b         | INSIDE                 | 1.116                                                        | 0.482                          | 1401.85            | 675.99             | 0.538                          | 1238.13            | 666.31             |
| A_68_P32820570  | chrX:165758553-165758597                          | NM_008222:-299          | Hccs           | PROMOTER               | 1.115                                                        | 2.660                          | 185.27             | 492.74             | 2.965                          | 215.14             | 637.78             |
| A_68_P32410978  | chrX:56820599-56820643                            | ENSMUST00000124402:29   |                | INSIDE                 | 1.115                                                        | 2.919                          | 458.97             | 1339.88            | 3.254                          | 451.66             | 1469.69            |
| A_68_P31256669  | chr17:56651021-56651065                           | NM_011483:864           | ZnrF4          | INSIDE                 | 1.115                                                        | 0.208                          | 3205.42            | 665.88             | 0.232                          | 2218.40            | 513.72             |
| A_68_P28175804  | chr11:118952556-118952600                         | NM_007625:-5027         | Cbx4           | PROMOTER               | 1.115                                                        | 0.347                          | 1481.02            | 513.51             | 0.386                          | 1119.30            | 432.58             |
| A_68_P28051746  | chr11:97491089-97491133                           | NM_175332:-80           | E130012A19Rik  | PROMOTER               | 1.115                                                        | 0.438                          | 1904.29            | 834.69             | 0.489                          | 1507.51            | 736.87             |
| A_68_P28037459  | chr1:95084648-95084692                            | ENSMUST00000150818:2276 |                | INSIDE                 | 1.115                                                        | 4.147                          | 1593.18            | 6606.31            | 4.623                          | 1695.12            | 7836.45            |
| A_68_P26804375  | chr9:106553157-106553201                          | NM_001160353:5262       | Grm2           | INSIDE                 | 1.115                                                        | 2.355                          | 937.52             | 2207.83            | 2.625                          | 767.78             | 2015.60            |
| A_68_P26766610  | chr9:99771206-99771250                            | NM_011440:5361          | Sox14          | DOWNSTREAM             | 1.115                                                        | 0.362                          | 1933.73            | 699.36             | 0.403                          | 1366.35            | 550.75             |
| A_68_P26141794  | chr8:109394848-109394892                          | NM_008217:729           | Has3           | INSIDE                 | 1.115                                                        | 0.447                          | 1888.67            | 844.80             | 0.499                          | 1381.87            | 689.21             |
| A_68_P25506338  | chr7:134732367-134732411                          | NM_172281:177           | Rnf40          | INSIDE                 | 1.115                                                        | 0.182                          | 4126.44            | 749.63             | 0.202                          | 2972.70            | 601.88             |
| A_68_P25114497  | chr7:57014275-57014319                            | NM_001146049:-179       | Htatip2        | PROMOTER               | 1.115                                                        | 0.303                          | 1557.04            | 471.14             | 0.337                          | 1120.05            | 377.85             |
| A_68_P25016729  | chr7:28116317-28116361                            | NM_001113549:2329       | Ltbp4          | INSIDE                 | 1.115                                                        | 1.584                          | 916.00             | 1450.57            | 1.766                          | 753.90             | 1331.09            |
| A_68_P25004864  | chr7:25218003-25218050                            | NM_199013:12675         | Irgc1          | INSIDE                 | 1.115                                                        | 1.995                          | 489.22             | 975.83             | 2.224                          | 453.24             | 1007.79            |
| A_68_P22317894  | chr3:89018391-89018435                            | NM_001161824:-155       | Mtx1           | DIVERGENT_PROMOTER     | 1.115                                                        | 0.617                          | 3486.57            | 2150.07            | 0.688                          | 2353.16            | 1618.14            |
| A_68_P31619631  | chr18:35862603-35862647                           | NM_029696:174           | Dnajc18        | INSIDE                 | 1.114                                                        | 0.398                          | 1143.08            | 454.77             | 0.443                          | 939.78             | 416.68             |
| A_68_P29478589  | chr14:26426247-26426291                           | NM_183208:147598        | Zmiz1          | INSIDE                 | 1.114                                                        | 0.464                          | 1522.33            | 707.01             | 0.517                          | 1087.64            | 562.53             |
| A_68_P28814400  | chr13:9093008-9093052                             | NM_172585:-120          | Larp4b         | PROMOTER               | 1.114                                                        | 0.407                          | 1806.37            | 734.83             | 0.453                          | 1426.49            | 646.16             |
| A_68_P26350702  | chr9:21969587-21969631                            | NM_001082532:8319       | Pigyl          | DOWNSTREAM             | 1.114                                                        | 1.481                          | 1635.55            | 2422.96            | 1.651                          | 1401.31            | 2313.39            |
| A_68_P23152971  | chr4:100741981-100742025                          | NM_183024:360           | Raver2         | INSIDE                 | 1.114                                                        | 0.459                          | 1101.82            | 506.15             | 0.512                          | 919.33             | 470.43             |
| A_68_P20411738  | chr1:88256632-88256676                            | NR_015507:506           | C130036L24Rik  | INSIDE                 | 1.114                                                        | 1.509                          | 940.40             | 1418.76            | 1.681                          | 696.45             | 1170.66            |
| A_68_P20121784  | chr1:30930609-30930653                            | ENSMUST00000046443:-91  |                | PROMOTER               | 1.114                                                        | 2.480                          | 810.75             | 2010.57            | 2.763                          | 766.23             | 2116.79            |
| A_68_P31349750  | chr17:74396973-74397017                           | NM_053188:262           | Srd5a2         | INSIDE                 | 1.113                                                        | 0.314                          | 1886.88            | 592.90             | 0.350                          | 1429.22            | 499.68             |
| A_68_P30501454  | chr15:102844844-102844888                         | NR_030526:-474          | Mir615         | PROMOTER               | 1.113                                                        | 1.373                          | 1889.81            | 2594.82            | 1.528                          | 1383.09            | 2112.90            |
| A_68_P30423620  | chr15:88997813-88997857                           | NM_001159521:6446       | Plxn2          | INSIDE                 | 1.113                                                        | 1.384                          | 1472.60            | 2038.48            | 1.540                          | 1091.55            | 1681.34            |
| A_68_P28670942  | chr12:99812802-99812846                           | NM_029911:3326          | Kcnk10         | INSIDE                 | 1.113                                                        | 0.152                          | 5346.54            | 812.45             | 0.169                          | 3698.57            | 625.40             |
| A_68_P28206069  | chr12:5381867-5381911                             | NM_001164493:600        | Klhl29         | INSIDE                 | 1.113                                                        | 0.415                          | 1618.36            | 672.28             | 0.462                          | 1203.04            | 556.04             |
| A_68_P26815690  | chr9:10849968-108500012                           | NM_028944:-59           | P4htm          | PROMOTER               | 1.113                                                        | 1.983                          | 751.58             | 1490.67            | 2.208                          | 634.42             | 1401.07            |
| A_68_P25587562  | chr7:148414623-148414668                          | NM_001081118:-41        | Phrf1          | DIVERGENT_PROMOTER     | 1.113                                                        | 2.248                          | 670.73             | 1507.93            | 2.502                          | 755.59             | 1890.58            |
| A_68_P25447475  | chr7:123451082-123451126                          | ENSMUST00000106605:786  |                | INSIDE                 | 1.113                                                        | 0.502                          | 2677.52            | 1343.17            | 0.558                          | 2143.52            | 1197.07            |
| A_68_P25259447  | chr7:86293791-86293835                            | NM_001045489:134        | Mfge8          | INSIDE                 | 1.113                                                        | 2.104                          | 1416.34            | 2980.44            | 2.343                          | 1341.03            | 3141.95            |

| ProbeName      | Target position of probe on CpG island microarray | TargetID               | GeneSymbol | CpG island Description | Ratio of relative methylation (TiO <sub>2</sub> -NP/Vehicle) | Sham group                     |                    |                    | TiO <sub>2</sub> -H group      |                    |                    |
|----------------|---------------------------------------------------|------------------------|------------|------------------------|--------------------------------------------------------------|--------------------------------|--------------------|--------------------|--------------------------------|--------------------|--------------------|
|                |                                                   |                        |            |                        |                                                              | Relative methylation (Cy5/Cy3) | Cy3 signal (Input) | Cy5 signal (MeDIP) | Relative methylation (Cy5/Cy3) | Cy3 signal (Input) | Cy5 signal (MeDIP) |
| A_68_P23985677 | chr5:111848812-111848856                          | NM_001081235:1649      | Mn1        | INSIDE                 | 1.113                                                        | 1.417                          | 1412.83            | 2002.14            | 1.577                          | 1030.36            | 1625.08            |
| A_68_P23314731 | chr4:132478927-132478977                          | NM_001163792:-486      | Fam76a     | PROMOTER               | 1.113                                                        | 3.754                          | 738.20             | 2771.49            | 4.180                          | 495.74             | 2072.42            |
| A_68_P23255466 | chr4:120887199-120887243                          | ENSMUST00000056635:469 |            | INSIDE                 | 1.113                                                        | 0.225                          | 1964.08            | 441.90             | 0.250                          | 1583.77            | 396.49             |
| A_68_P28190094 | chr11:121215805-121215849                         | NM_025793:-65          | Wdr45l     | PROMOTER               | 1.112                                                        | 0.529                          | 2387.55            | 1263.95            | 0.589                          | 1905.59            | 1122.12            |
| A_68_P27987615 | chr11:86014727-86014771                           | NM_178309:-53          | Brip1      | PROMOTER               | 1.112                                                        | 0.304                          | 2087.80            | 633.72             | 0.337                          | 1438.01            | 485.29             |
| A_68_P24127563 | chr5:138227997-138228041                          | NM_144913:-89          | Mepece     | DIVERGENT_PROMOTER     | 1.112                                                        | 0.513                          | 1274.82            | 653.97             | 0.571                          | 1011.25            | 577.04             |
| A_68_P23361671 | chr4:140581070-140581114                          | NM_172122:28484        | Crocc      | INSIDE                 | 1.112                                                        | 2.326                          | 1017.04            | 2366.01            | 2.586                          | 825.62             | 2134.98            |
| A_68_P32745115 | chrX:147779348-147779392                          | NM_198105:605          | Fam120c    | INSIDE                 | 1.111                                                        | 0.458                          | 1880.41            | 861.73             | 0.509                          | 2660.68            | 1354.51            |
| A_68_P27926999 | chr11:75401904-75401948                           | NM_008850:317          | Pitpna     | INSIDE                 | 1.111                                                        | 0.430                          | 4852.70            | 2087.36            | 0.478                          | 3561.26            | 1702.53            |
| A_68_P27842501 | chr11:60166165-60166209                           | NM_001039092:221       | Tomt1l2    | INSIDE                 | 1.111                                                        | 0.428                          | 4446.54            | 1903.18            | 0.475                          | 3126.60            | 1486.32            |
| A_68_P26846117 | chr9:114640435-114640479                          | NM_026036:136          | Cntm6      | INSIDE                 | 1.111                                                        | 0.514                          | 2635.07            | 1355.05            | 0.571                          | 1984.40            | 1133.82            |
| A_68_P23396577 | chr4:148178997-148179041                          | NM_027195:518          | Cas2l      | INSIDE                 | 1.111                                                        | 0.465                          | 4247.04            | 1972.76            | 0.516                          | 3146.90            | 1623.88            |
| A_68_P23094809 | chr4:88940440-88940484                            | NM_009877:-61          | Cdkn2a     | INSIDE                 | 1.111                                                        | 0.536                          | 1654.60            | 886.47             | 0.595                          | 1305.81            | 777.02             |
| A_68_P21486779 | chr2:103868017-103868061                          | NM_020593:83           | Fbxo3      | INSIDE                 | 1.111                                                        | 0.266                          | 3671.46            | 974.86             | 0.295                          | 2944.25            | 868.35             |
| A_68_P20612315 | chr11:132774907-132774951                         | NM_026976:12575        | Faim3      | INSIDE                 | 1.111                                                        | 0.262                          | 1735.46            | 453.86             | 0.291                          | 1337.21            | 388.59             |
| A_68_P32134212 | chr19:44831155-44831199                           | NM_011037:-707         | Pax2       | PROMOTER               | 1.110                                                        | 0.538                          | 2253.99            | 1212.03            | 0.597                          | 1559.84            | 930.80             |
| A_68_P31302581 | chr17:66121665-66121709                           | NM_133685:406          | Rab31      | INSIDE                 | 1.110                                                        | 0.441                          | 2716.96            | 1198.64            | 0.490                          | 1927.01            | 943.73             |
| A_68_P30243544 | chr15:57525714-57525758                           | NM_199449:-485         | Zfx2       | PROMOTER               | 1.110                                                        | 3.503                          | 1871.99            | 6556.72            | 3.887                          | 1484.97            | 5771.70            |
| A_68_P29493964 | chr14:29331522-29331566                           | NM_009524:12886        | Wnt5a      | INSIDE                 | 1.110                                                        | 1.655                          | 1351.37            | 2235.87            | 1.836                          | 1124.74            | 2065.52            |
| A_68_P28818475 | chr13:9763163-9763207                             | NM_001199141:1376      | Zmynd11    | INSIDE                 | 1.110                                                        | 0.355                          | 1397.82            | 495.98             | 0.394                          | 1148.73            | 452.37             |
| A_68_P27922752 | chr11:74651542-74651586                           | NM_010813:7139         | Mnt        | INSIDE                 | 1.110                                                        | 2.458                          | 517.44             | 1271.93            | 2.727                          | 326.15             | 889.53             |
| A_68_P27628922 | chr11:19825101-19825145                           | NM_033523:678          | Spred2     | INSIDE                 | 1.110                                                        | 0.337                          | 3659.67            | 1233.68            | 0.374                          | 2597.89            | 972.12             |
| A_68_P27209838 | chr10:66558947-66558991                           | NM_001204915:768       | Reep3      | INSIDE                 | 1.110                                                        | 0.490                          | 1209.72            | 593.06             | 0.544                          | 978.98             | 532.75             |
| A_68_P26023616 | chr8:87604506-87604561                            | NM_026399:112          | Wdr83      | INSIDE                 | 1.110                                                        | 0.481                          | 1228.12            | 590.99             | 0.534                          | 955.47             | 510.52             |
| A_68_P25910162 | chr8:63966799-63966843                            | NM_145595:290          | Cbr4       | INSIDE                 | 1.110                                                        | 0.464                          | 1393.00            | 646.55             | 0.515                          | 1173.15            | 604.56             |
| A_68_P25094160 | chr7:52888072-52888116                            | NM_028544:5188         | Rasip1     | INSIDE                 | 1.110                                                        | 1.638                          | 909.62             | 1489.61            | 1.817                          | 777.10             | 1412.06            |
| A_68_P24966279 | chr7:11080522-11080566                            | NM_009577:186          | Zik1       | INSIDE                 | 1.110                                                        | 0.260                          | 3250.83            | 843.76             | 0.288                          | 2207.70            | 636.12             |
| A_68_P24818548 | chr6:125031803-125031847                          | NM_001163268:10530     | Lpar5      | INSIDE                 | 1.110                                                        | 1.581                          | 1868.08            | 2953.70            | 1.755                          | 1410.66            | 2476.21            |
| A_68_P22829266 | chr4:34011372-34011416                            | NM_007726:-212         | Cnr1       | PROMOTER               | 1.110                                                        | 0.448                          | 1868.44            | 836.94             | 0.497                          | 1415.07            | 703.68             |
| A_68_P32414052 | chrX:57657724-57657768                            | NM_001001798:-590      | Atp11c     | PROMOTER               | 1.109                                                        | 1.679                          | 478.68             | 803.87             | 1.863                          | 606.67             | 1130.01            |
| A_68_P30961940 | chr16:91269862-91269906                           | NM_016968:-129         | Olig1      | PROMOTER               | 1.109                                                        | 0.328                          | 1470.37            | 482.10             | 0.364                          | 1255.49            | 456.52             |
| A_68_P30358260 | chr15:78004836-78004880                           | NM_025931:-320         | Irf27      | PROMOTER               | 1.109                                                        | 0.239                          | 2333.00            | 558.64             | 0.265                          | 1880.15            | 499.08             |
| A_68_P28175491 | chr11:118907932-118907976                         | NM_013926:-5727        | Cbx8       | PROMOTER               | 1.109                                                        | 1.841                          | 630.97             | 1161.78            | 2.041                          | 570.62             | 1164.86            |
| A_68_P27563766 | chr11:5420720-5420764                             | NM_013842:-227         | Xbp1       | PROMOTER               | 1.109                                                        | 0.489                          | 1366.29            | 667.68             | 0.542                          | 1044.16            | 565.99             |
| A_68_P27542229 | chr10:128026612-128026657                         | NM_010153:-77          | ErbB3      | PROMOTER               | 1.109                                                        | 1.750                          | 898.36             | 1571.98            | 1.941                          | 769.38             | 1493.27            |
| A_68_P25604012 | chr7:151164433-151164477                          |                        |            | Unknown                | 1.109                                                        | 0.224                          | 2660.44            | 594.73             | 0.248                          | 1919.36            | 475.66             |
| A_68_P25578898 | chr7:146768350-146768394                          | NR_027857:324          | Nkx6-2     | INSIDE                 | 1.109                                                        | 0.341                          | 1595.34            | 543.90             | 0.378                          | 1120.82            | 423.67             |
| A_68_P25261264 | chr7:86610001-86610045                            | NM_017462:1137         | Polg       | INSIDE                 | 1.109                                                        | 0.459                          | 1216.41            | 558.65             | 0.509                          | 990.24             | 504.17             |
| A_68_P23591876 | chr5:34278835-34278879                            | NM_011914:51           | Whsc2      | INSIDE                 | 1.109                                                        | 0.480                          | 1360.82            | 516.89             | 0.421                          | 1125.87            | 474.35             |
| A_68_P23440547 | chr4:155148630-155148674                          | NM_147776:18           | Vwa1       | INSIDE                 | 1.109                                                        | 0.293                          | 2628.37            | 770.43             | 0.325                          | 1934.37            | 628.77             |
| A_68_P23361907 | chr4:140616661-140616705                          | NM_001145958:-222      | Crocc      | PROMOTER               | 1.109                                                        | 0.393                          | 1826.04            | 717.62             | 0.436                          | 1337.03            | 582.93             |
| A_68_P21423681 | chr2:91470003-91470047                            | NM_010168:6547         | F2         | INSIDE                 | 1.109                                                        | 1.707                          | 539.04             | 920.10             | 1.894                          | 502.20             | 950.98             |
| A_68_P20441861 | chr1:93241894-93241938                            | NM_001033292:23265     | Espnl      | INSIDE                 | 1.109                                                        | 1.498                          | 810.16             | 1213.39            | 1.662                          | 667.32             | 1108.80            |
| A_68_P20349521 | chr1:74647661-74647705                            | NM_021313:289          | Rnf25      | INSIDE                 | 1.109                                                        | 0.136                          | 6113.89            | 829.41             | 0.150                          | 4479.19            | 673.61             |
| A_68_P30346951 | chr15:76060156-76060200                           | NM_201385:-251         | Plec       | PROMOTER               | 1.108                                                        | 0.336                          | 1789.68            | 601.41             | 0.372                          | 1485.92            | 553.33             |
| A_68_P27979770 | chr11:84632693-84632737                           | NM_145433:303          | Mrm1       | INSIDE                 | 1.108                                                        | 0.492                          | 1343.97            | 660.63             | 0.545                          | 973.51             | 530.14             |
| A_68_P27937691 | chr11:77275964-77276008                           | NM_139128:-1428        | Coro6      | PROMOTER               | 1.108                                                        | 0.209                          | 4451.93            | 928.40             | 0.231                          | 2809.57            | 649.43             |
| A_68_P26039231 | chr8:90662304-90662348                            | NM_172757:543          | Heatr3     | INSIDE                 | 1.108                                                        | 1.757                          | 1433.83            | 2519.86            | 1.947                          | 1148.41            | 2235.62            |
| A_68_P23192161 | chr4:107356258-107356302                          | NM_019872:487          | DmrB1      | INSIDE                 | 1.108                                                        | 1.977                          | 982.66             | 1942.46            | 2.190                          | 808.33             | 1770.19            |
| A_68_P29613385 | chr14:55251451-55251495                           | NM_199470:8729         | Cdh24      | INSIDE                 | 1.107                                                        | 1.824                          | 1694.53            | 3091.64            | 2.020                          | 1282.18            | 2590.64            |
| A_68_P28159196 | chr11:116273617-116273661                         | NM_027258:708          | Rnf157     | INSIDE                 | 1.107                                                        | 0.376                          | 1451.09            | 546.07             | 0.417                          | 1043.15            | 434.53             |
| A_68_P27041530 | chr10:30522669-30522713                           | NM_172495:223          | Ncoa7      | INSIDE                 | 1.107                                                        | 0.433                          | 1834.54            | 793.92             | 0.479                          | 1452.38            | 695.51             |
| A_68_P26537376 | chr9:56482845-56482889                            | NM_181074:50194        | Lingo1     | INSIDE                 | 1.107                                                        | 0.368                          | 2087.25            | 767.14             | 0.407                          | 1601.65            | 651.59             |
| A_68_P25026345 | chr7:30066535-30066579                            | NM_001082548:440       | Spint2     | INSIDE                 | 1.107                                                        | 0.545                          | 2082.96            | 1134.67            | 0.603                          | 1619.17            | 976.05             |
| A_68_P25005382 | chr7:25316864-25316908                            | NM_153134:1220         | Irgq       | INSIDE                 | 1.107                                                        | 0.317                          | 1627.83            | 516.23             | 0.351                          | 1206.83            | 423.61             |
| A_68_P24025453 | chr5:118687359-118687403                          | NM_172998:7490         | Rnf12      | INSIDE                 | 1.107                                                        | 3.142                          | 890.78             | 2798.54            | 3.477                          | 680.09             | 2364.39            |
| A_68_P22793479 | chr4:26273870-26273915                            | NM_172865:-93          | Manea      | PROMOTER               | 1.107                                                        | 0.180                          | 2616.42            | 472.13             | 0.200                          | 2024.39            | 404.28             |
| A_68_P22393610 | chr3:104667906-104667950                          | NM_153091:-70          | Slf1       | DIVERGENT_PROMOTER     | 1.107                                                        | 0.285                          | 1712.93            | 489.02             | 0.316                          | 1296.25            | 409.62             |
| A_68_P21929617 | chr3:7612894-7612938                              | NM_008371:511          | Il7        | INSIDE                 | 1.107                                                        | 0.401                          | 1255.65            | 504.12             | 0.444                          | 1025.88            | 455.89             |
| A_68_P21490976 | chr2:104656612-104656656                          | NM_001123327:219       | Qser1      | INSIDE                 | 1.107                                                        | 0.322                          | 2158.06            | 695.21             | 0.357                          | 1649.73            | 588.14             |
| A_68_P29747539 | chr14:79125062-79125106                           | NM_001081336:-188      | Dgkh       | PROMOTER               | 1.106                                                        | 2.805                          | 1179.16            | 3308.12            | 3.102                          | 968.33             | 3003.91            |
| A_68_P28575259 | chr12:81440889-81440933                           | NM_177267:96678        | Dcat5      | INSIDE                 | 1.106                                                        | 2.568                          | 1857.66            | 4771.33            | 2.840                          | 1549.29            | 4399.42            |
| A_68_P28195051 | chr12:3427564-3427608                             | NM_172421:703          | Asxl2      | INSIDE                 | 1.106                                                        | 0.243                          | 1819.53            | 442.08             | 0.269                          | 1364.88            | 366.70             |
| A_68_P28187623 | chr11:120794145-120794189                         | NM_027745:20           | Ccdc57     | INSIDE                 | 1.106                                                        | 0.543                          | 1317.16            | 714.59             | 0.600                          | 1044.35            | 626.89             |
| A_68_P27996046 | chr11:87578150-87578194                           | NM_172449:4130         | Bzap1      | INSIDE                 | 1.106                                                        | 2.091                          | 1103.79            | 2307.97            | 2.312                          | 868.36             | 2007.97            |

| ProbeName      | Target position of probe on CpG island microarray | TargetID               | GeneSymbol    | CpG island Description | Ratio of relative methylation (TiO <sub>2</sub> -NP/Vehicle) | Sham group                     |                    |                    | TiO <sub>2</sub> -H group      |                    |                    |
|----------------|---------------------------------------------------|------------------------|---------------|------------------------|--------------------------------------------------------------|--------------------------------|--------------------|--------------------|--------------------------------|--------------------|--------------------|
|                |                                                   |                        |               |                        |                                                              | Relative methylation (Cy5/Cy3) | Cy3 signal (Input) | Cy5 signal (MeDIP) | Relative methylation (Cy5/Cy3) | Cy3 signal (Input) | Cy5 signal (MeDIP) |
| A_68_P27351983 | chr10:92624393-92624437                           | NR_035452:-1115        | Mir1931       | PROMOTER               | 1.106                                                        | 0.541                          | 1967.72            | 1064.91            | 0.599                          | 1395.43            | 835.42             |
| A_68_P25009650 | chr7:26099741-26099785                            | NM_183311:8636         | Tmem145       | INSIDE                 | 1.106                                                        | 0.432                          | 1584.23            | 684.18             | 0.478                          | 1045.82            | 499.67             |
| A_68_P24912679 | chr6:143782088-143782132                          | NM_001113559:375968    | Sox5          | INSIDE                 | 1.106                                                        | 1.770                          | 1524.08            | 2697.88            | 1.958                          | 1199.21            | 2348.55            |
| A_68_P20353687 | chr17:75384995-75385039                           | NM_001085370:2832      | Speg          | INSIDE                 | 1.106                                                        | 0.398                          | 1784.85            | 709.58             | 0.440                          | 1483.72            | 652.17             |
| A_68_P31054930 | chr17:13201009-13201053                           | NM_013671:326          | Sod2          | INSIDE                 | 1.105                                                        | 1.392                          | 1312.49            | 1826.65            | 1.538                          | 976.97             | 1503.04            |
| A_68_P30546424 | chr16:11134701-11134745                           | NM_029582:-97          | Txndc11       | PROMOTER               | 1.105                                                        | 0.506                          | 2753.46            | 1392.09            | 0.559                          | 1788.73            | 999.58             |
| A_68_P30347742 | chr15:76181910-76181954                           | NM_001164607:209       | Maf1          | INSIDE                 | 1.105                                                        | 0.389                          | 1514.71            | 588.73             | 0.429                          | 1170.54            | 502.54             |
| A_68_P29334866 | chr13:113253950-113253994                         | NM_010560:305          | Il6st         | PROMOTER               | 1.105                                                        | 1.808                          | 1029.38            | 1861.12            | 1.999                          | 806.91             | 1612.68            |
| A_68_P28397455 | chr12:45430084-45430128                           | NM_001146031:235       | Nrcam         | INSIDE                 | 1.105                                                        | 0.267                          | 3998.96            | 1066.46            | 0.295                          | 2784.03            | 820.51             |
| A_68_P28078916 | chr11:102181390-102181434                         | NM_011551:-1002        | Ubrf          | PROMOTER               | 1.105                                                        | 0.314                          | 3436.86            | 1077.63            | 0.346                          | 2262.82            | 783.88             |
| A_68_P28033280 | chr11:94352619-94352663                           | NM_027984:8648         | Epn3          | INSIDE                 | 1.105                                                        | 13.067                         | 1271.49            | 16614.50           | 14.435                         | 1188.27            | 17152.23           |
| A_68_P27562402 | chr11:5161353-5161397                             | NM_032396:239          | Kremen1       | INSIDE                 | 1.105                                                        | 0.442                          | 1343.69            | 593.69             | 0.488                          | 1099.26            | 536.49             |
| A_68_P27282339 | chr10:79769158-79769202                           | NM_011789:4616         | Apc2          | INSIDE                 | 1.105                                                        | 2.014                          | 808.64             | 1628.97            | 2.227                          | 615.96             | 1371.71            |
| A_68_P24928970 | chr6:146451188-146451232                          | NM_010586:-776         | Iltr2         | PROMOTER               | 1.105                                                        | 0.299                          | 3872.86            | 1156.64            | 0.330                          | 2939.48            | 969.67             |
| A_68_P24295434 | chr6:23203943-23203987                            | NM_028462:-5700        | Fezf1         | PROMOTER               | 1.105                                                        | 0.157                          | 3078.47            | 484.21             | 0.174                          | 2409.94            | 418.92             |
| A_68_P24114330 | chr5:135499738-135499782                          | NM_016801:319          | Stx1a         | INSIDE                 | 1.105                                                        | 0.524                          | 3483.36            | 1824.90            | 0.579                          | 2358.36            | 1364.70            |
| A_68_P23467993 | chr5:8422278-8422322                              | NM_001190717:416       | Dbf4          | INSIDE                 | 1.105                                                        | 0.592                          | 1801.82            | 1066.38            | 0.654                          | 1517.02            | 992.48             |
| A_68_P23245424 | chr4:119094947-119094991                          | NM_026494:57           | Ppcs          | INSIDE                 | 1.105                                                        | 0.501                          | 1317.62            | 660.52             | 0.554                          | 1063.73            | 589.39             |
| A_68_P22202270 | chr3:69121308-69121352                            | NM_178726:491          | Ppm11         | INSIDE                 | 1.105                                                        | 0.322                          | 1520.90            | 489.59             | 0.356                          | 1169.69            | 415.95             |
| A_68_P21419567 | chr2:90745097-90745145                            | NM_025991:178          | Kbtbd4        | INSIDE                 | 1.105                                                        | 0.561                          | 1506.02            | 845.17             | 0.620                          | 1223.04            | 758.71             |
| A_68_P32668461 | chrX:130222350-130222394                          | NM_001105245:1160      | Pcdh19        | INSIDE                 | 1.104                                                        | 2.748                          | 228.56             | 628.15             | 3.034                          | 249.23             | 756.11             |
| A_68_P32340726 | chrX:39421609-39421653                            | NM_009688:618          | Xiap          | INSIDE                 | 1.104                                                        | 1.882                          | 439.85             | 828.00             | 2.078                          | 588.47             | 1222.72            |
| A_68_P31097896 | chr17:24664666-24664710                           | NM_001172113:195       | Traf7         | INSIDE                 | 1.104                                                        | 0.177                          | 5646.95            | 1000.47            | 0.196                          | 4132.17            | 808.29             |
| A_68_P30479790 | chr15:99200609-99200653                           | NM_011711:267          | Fmnl3         | INSIDE                 | 1.104                                                        | 0.227                          | 4671.40            | 1062.34            | 0.251                          | 3321.16            | 834.15             |
| A_68_P28534709 | chr12:74046481-74046525                           | NM_011384:5571         | Six6          | DOWNSTREAM             | 1.104                                                        | 0.579                          | 1999.71            | 1158.77            | 0.640                          | 1504.79            | 962.91             |
| A_68_P28222997 | chr12:8506759-8506803                             | NM_007483:11           | Rhob          | INSIDE                 | 1.104                                                        | 1.604                          | 948.80             | 1522.29            | 1.771                          | 725.07             | 1284.13            |
| A_68_P25025266 | chr7:29871013-29871057                            | NR_035489:-2321        | Mir1963       | PROMOTER               | 1.104                                                        | 2.419                          | 877.75             | 2123.31            | 2.671                          | 742.66             | 1983.82            |
| A_68_P22888515 | chr4:46402231-46402275                            | NM_029086:43           | 5830415F09Rik | INSIDE                 | 1.104                                                        | 0.498                          | 4041.86            | 2013.06            | 0.550                          | 2916.30            | 1603.69            |
| A_68_P21938382 | chr3:9608958-9609002                              | NM_133218:1105         | Zip704        | INSIDE                 | 1.104                                                        | 0.108                          | 6032.07            | 650.45             | 0.119                          | 4160.01            | 495.35             |
| A_68_P20430407 | chr1:91477732-91477776                            | NM_001037136:126369    | Agap1         | INSIDE                 | 1.104                                                        | 2.375                          | 260.01             | 617.47             | 2.621                          | 250.82             | 657.38             |
| A_68_P29697251 | chr14:70205056-70205100                           | NM_153514:274          | Rhobtb2       | INSIDE                 | 1.103                                                        | 0.601                          | 2671.90            | 1605.59            | 0.663                          | 2013.38            | 1334.39            |
| A_68_P29654694 | chr14:62911407-62911451                           | NM_173419:388          | Dleu7         | INSIDE                 | 1.103                                                        | 0.407                          | 1299.76            | 529.01             | 0.449                          | 1072.60            | 481.40             |
| A_68_P29613381 | chr14:55251101-55251145                           | NM_199470:9079         | Cdh24         | INSIDE                 | 1.103                                                        | 2.210                          | 1356.14            | 2997.33            | 2.437                          | 961.56             | 2343.74            |
| A_68_P29062972 | chr13:56804405-56804449                           | NM_001164042:-602      | Smad5         | PROMOTER               | 1.103                                                        | 1.884                          | 494.88             | 932.55             | 2.079                          | 482.09             | 1002.08            |
| A_68_P27897675 | chr11:69694588-69694632                           | NM_153143:-123         | Kctd11        | PROMOTER               | 1.103                                                        | 1.507                          | 1666.35            | 2510.99            | 1.662                          | 1350.69            | 2245.13            |
| A_68_P26544128 | chr9:57684324-57684368                            | NM_019689:-2305        | Arid3b        | PROMOTER               | 1.103                                                        | 0.362                          | 1933.11            | 699.06             | 0.399                          | 1545.87            | 616.69             |
| A_68_P26495378 | chr9:48863573-48863617                            | NM_012039:-91          | Zw10          | PROMOTER               | 1.103                                                        | 0.516                          | 1384.30            | 714.11             | 0.569                          | 1086.86            | 618.44             |
| A_68_P26137946 | chr8:108660718-108660762                          | NM_176838:134          | Esrp2         | INSIDE                 | 1.103                                                        | 0.314                          | 6601.99            | 2074.40            | 0.347                          | 4047.10            | 1402.69            |
| A_68_P25357077 | chr7:105804935-105804979                          | NM_172280:123          | 2210018M11Rik | INSIDE                 | 1.103                                                        | 0.588                          | 1736.48            | 1021.56            | 0.649                          | 1484.11            | 962.66             |
| A_68_P25353896 | chr7:105260083-105260127                          | NM_008663:7899         | Myo7a         | INSIDE                 | 1.103                                                        | 0.424                          | 1460.71            | 619.62             | 0.468                          | 1190.08            | 556.76             |
| A_68_P25031178 | chr7:31141047-31141091                            | NM_175478:6723         | Lrfn3         | INSIDE                 | 1.103                                                        | 1.967                          | 688.55             | 1354.37            | 2.169                          | 539.87             | 1170.82            |
| A_68_P24427164 | chr6:48388295-48388339                            | NM_001085415:6773      | Zip467        | INSIDE                 | 1.103                                                        | 1.698                          | 1366.27            | 2319.91            | 1.873                          | 1096.40            | 2054.06            |
| A_68_P23590585 | chr5:34037821-34037865                            | AK172441:87544         |               | INSIDE                 | 1.103                                                        | 0.354                          | 1604.79            | 568.88             | 0.391                          | 1242.92            | 486.01             |
| A_68_P23310049 | chr4:131630823-131630867                          | NM_183428:-2832        |               | INSIDE                 | 1.103                                                        | 1.510                          | 1013.40            | 1530.50            | 1.666                          | 850.15             | 1416.44            |
| A_68_P21418960 | chr2:90623108-90623152                            | NM_178755:230          | Agb12         | INSIDE                 | 1.103                                                        | 0.403                          | 1605.48            | 646.67             | 0.444                          | 1331.61            | 591.35             |
| A_68_P21144178 | chr2:37648888-37648932                            | NM_001163566:17142     | Crb2          | INSIDE                 | 1.103                                                        | 2.564                          | 1413.81            | 3624.76            | 2.829                          | 1122.49            | 3175.43            |
| A_68_P20735842 | chr1:156946788-156946833                          | NM_010500:-44          | Ier5          | PROMOTER               | 1.103                                                        | 0.268                          | 3672.38            | 982.74             | 0.295                          | 2235.82            | 659.87             |
| A_68_P20038597 | chr1:12982588-12982632                            | NM_172841:-1394        | Sleo5a1       | PROMOTER               | 1.103                                                        | 0.356                          | 1221.05            | 434.46             | 0.392                          | 977.42             | 383.61             |
| A_68_P28577654 | chr12:81892119-81892163                           | NM_178682:595          | 4933426M11Rik | INSIDE                 | 1.102                                                        | 2.224                          | 522.90             | 1162.88            | 2.450                          | 478.41             | 1171.96            |
| A_68_P28469868 | chr12:60114568-60114612                           | NM_025656:211          | Sip1          | INSIDE                 | 1.102                                                        | 3.509                          | 621.94             | 2182.17            | 3.865                          | 526.32             | 2034.40            |
| A_68_P28445676 | chr12:55169720-55169764                           | NM_013780:820079       | Npas3         | INSIDE                 | 1.102                                                        | 1.909                          | 2087.72            | 3985.25            | 2.103                          | 1694.89            | 3564.69            |
| A_68_P28314292 | chr12:29334596-29334640                           | NM_011275:152          | Rnaschl1      | INSIDE                 | 1.102                                                        | 0.457                          | 1415.33            | 647.21             | 0.504                          | 1185.96            | 597.72             |
| A_68_P28054685 | chr11:98010627-98010671                           | NM_028149:282          | Fbxl20        | INSIDE                 | 1.102                                                        | 0.294                          | 2575.38            | 757.13             | 0.324                          | 1901.39            | 615.97             |
| A_68_P26128335 | chr8:106919047-106919091                          | NM_153582:528          | Cmtm4         | INSIDE                 | 1.102                                                        | 2.157                          | 1074.39            | 2317.48            | 2.378                          | 853.77             | 2029.99            |
| A_68_P25447478 | chr7:123451427-123451471                          | ENSMUST00000106605:442 |               | INSIDE                 | 1.102                                                        | 0.416                          | 1531.59            | 637.06             | 0.459                          | 1171.05            | 536.96             |
| A_68_P24982503 | chr7:17200478-17200522                            | NM_172739:-158         | Grlf1         | PROMOTER               | 1.102                                                        | 0.482                          | 1290.16            | 621.23             | 0.531                          | 1018.58            | 540.68             |
| A_68_P24537469 | chr6:71583121-71583165                            | NM_001038695:-243      | Kdm3a         | PROMOTER               | 1.102                                                        | 0.141                          | 4508.21            | 634.16             | 0.155                          | 2782.05            | 431.17             |
| A_68_P24152140 | chr5:143005995-143006039                          | NM_019943:14           | Paplb         | INSIDE                 | 1.102                                                        | 2.032                          | 1224.47            | 2487.96            | 2.238                          | 1036.92            | 2321.01            |
| A_68_P23442480 | chr4:155483981-155484025                          | NM_145557:-104         | 9430015G10Rik | PROMOTER               | 1.102                                                        | 1.723                          | 648.95             | 1118.35            | 1.900                          | 535.02             | 1016.33            |
| A_68_P23416137 | chr4:151406428-151406472                          | NM_031867:6149         | Tas1r1        | INSIDE                 | 1.102                                                        | 2.461                          | 740.95             | 1823.80            | 2.713                          | 586.67             | 1591.56            |
| A_68_P20900753 | chr1:187187399-187187443                          | NM_029735:447          | Eprs          | INSIDE                 | 1.102                                                        | 0.351                          | 2061.23            | 723.82             | 0.387                          | 1490.09            | 576.67             |
| A_68_P30486145 | chr15:100325764-100325808                         | NM_153407:-116         | Csmp2         | PROMOTER               | 1.101                                                        | 0.564                          | 1583.58            | 892.87             | 0.621                          | 1207.26            | 749.18             |
| A_68_P29335933 | chr13:113442449-113442493                         | NM_001145885:48        | Ddx4          | INSIDE                 | 1.101                                                        | 4.721                          | 1008.49            | 4761.07            | 5.197                          | 889.08             | 4620.32            |
| A_68_P27285629 | chr10:80269928-80269972                           | NM_007445:1958         | Amh           | INSIDE                 | 1.101                                                        | 2.500                          | 835.86             | 2089.26            | 2.752                          | 697.80             | 1920.65            |
| A_68_P25392272 | chr7:112574662-112574706                          | NM_007627:351          | Cckbr         | INSIDE                 | 1.101                                                        | 0.469                          | 2069.32            | 971.21             | 0.517                          | 1792.00            | 925.91             |

| ProbeName      | Target position of probe on CpG island microarray | TargetID                 | GeneSymbol    | CpG island Description | Ratio of relative methylation (TiO <sub>2</sub> -NP/Vehicle) | Sham group                     |                    |                    | TiO <sub>2</sub> -H group      |                    |                    |
|----------------|---------------------------------------------------|--------------------------|---------------|------------------------|--------------------------------------------------------------|--------------------------------|--------------------|--------------------|--------------------------------|--------------------|--------------------|
|                |                                                   |                          |               |                        |                                                              | Relative methylation (Cy5/Cy3) | Cy3 signal (Input) | Cy5 signal (MeDIP) | Relative methylation (Cy5/Cy3) | Cy3 signal (Input) | Cy5 signal (MeDIP) |
| A_68_P24125354 | chr5:137799067-137799111                          | NM_001159571:7752        | Ephb4         | INSIDE                 | 1.101                                                        | 2.129                          | 981.13             | 2089.03            | 2.343                          | 749.86             | 1757.13            |
| A_68_P22820141 | chr4:32326208-32326252                            | ENSMUST00000165661:-4477 |               | PROMOTER               | 1.101                                                        | 1.677                          | 1093.54            | 1833.77            | 1.846                          | 883.86             | 1631.51            |
| A_68_P22393113 | chr3:104584603-104584647                          | NM_027982:651            | Ppm1j         | INSIDE                 | 1.101                                                        | 0.467                          | 1567.49            | 732.67             | 0.515                          | 1209.44            | 622.54             |
| A_68_P20877310 | chr1:182626954-182626998                          | NM_013729:189            | Mixl1         | INSIDE                 | 1.101                                                        | 0.225                          | 2590.98            | 583.86             | 0.248                          | 2035.96            | 505.24             |
| A_68_P31934468 | chr19:6399999-6400043                             | NM_011242:-562           | Rasgrp2       | PROMOTER               | 1.100                                                        | 0.164                          | 4787.65            | 784.94             | 0.180                          | 3568.60            | 643.30             |
| A_68_P30151559 | chr15:38838244-38838288                           | NM_008056:388            | Fzd6          | INSIDE                 | 1.100                                                        | 0.348                          | 1344.80            | 468.56             | 0.383                          | 1102.33            | 422.36             |
| A_68_P27954544 | chr11:80291421-80291465                           | NM_009871:895            | Cdk5r1        | INSIDE                 | 1.100                                                        | 0.390                          | 1737.44            | 678.43             | 0.430                          | 1254.26            | 538.75             |
| A_68_P27163120 | chr10:57786106-57786150                           | NM_026148:-85            | Lims1         | PROMOTER               | 1.100                                                        | 0.509                          | 2853.44            | 1452.18            | 0.560                          | 2125.27            | 1189.57            |
| A_68_P24770497 | chr6:115311740-115311784                          | NM_001127330:524         | Pparg         | INSIDE                 | 1.100                                                        | 0.352                          | 2522.93            | 888.69             | 0.388                          | 1978.34            | 766.69             |
| A_68_P24622499 | chr6:88450317-88450361                            | NM_019685:34922          | Ruvb1         | DOWNSTREAM             | 1.100                                                        | 0.567                          | 4432.87            | 2514.48            | 0.624                          | 3391.75            | 2115.67            |
| A_68_P20409047 | chr1:87791215-87791259                            | NM_022417:152            | Itm2c         | INSIDE                 | 1.100                                                        | 0.501                          | 2446.38            | 1226.62            | 0.552                          | 1688.92            | 931.53             |
| A_68_P30490428 | chr15:101054889-101054933                         | NM_019518:273            | Grasp         | INSIDE                 | 1.099                                                        | 0.507                          | 1684.39            | 853.27             | 0.557                          | 1185.96            | 660.50             |
| A_68_P29224480 | chr13:93301031-93301075                           | NM_173392:-287           | Zfyve16       | PROMOTER               | 1.099                                                        | 0.400                          | 1600.73            | 639.95             | 0.439                          | 1199.35            | 522.05             |
| A_68_P28451629 | chr12:56499790-56499834                           | NM_011968:1              | Psma6         | INSIDE                 | 1.099                                                        | 0.471                          | 1254.07            | 591.17             | 0.518                          | 872.84             | 452.33             |
| A_68_P27973305 | chr11:83567284-83567328                           | NM_145432:168            | Heatr6        | INSIDE                 | 1.099                                                        | 0.543                          | 1583.02            | 859.36             | 0.597                          | 1275.65            | 761.02             |
| A_68_P27844241 | chr11:60513360-60513404                           | NM_001159404:191         | Llgl1         | INSIDE                 | 1.099                                                        | 1.629                          | 1028.71            | 1676.13            | 1.791                          | 818.90             | 1466.73            |
| A_68_P25711726 | chr8:23704183-23704227                            | NM_001198998:81          | Vdac3         | INSIDE                 | 1.099                                                        | 0.372                          | 1530.42            | 568.79             | 0.409                          | 1089.06            | 444.92             |
| A_68_P24008812 | chr5:115729714-115729758                          | NM_026504:26             | Coq5          | INSIDE                 | 1.099                                                        | 1.621                          | 777.59             | 1260.46            | 1.782                          | 760.79             | 1355.89            |
| A_68_P23896463 | chr5:92934119-92934163                            | NM_007644:494            | Scarb2        | INSIDE                 | 1.099                                                        | 0.494                          | 2167.01            | 1070.99            | 0.543                          | 1548.96            | 841.48             |
| A_68_P23091884 | chr4:88368371-88368415                            | NM_172871:20             | Klhl9         | INSIDE                 | 1.099                                                        | 0.597                          | 2079.37            | 1240.83            | 0.656                          | 1622.21            | 1063.72            |
| A_68_P23080771 | chr4:86257888-86257932                            | NM_173400:16             | Haus6         | INSIDE                 | 1.099                                                        | 0.385                          | 2681.51            | 1031.22            | 0.423                          | 2114.50            | 893.52             |
| A_68_P21875631 | chr2:174298018-174298062                          | NM_025531:402            | Slmo2         | INSIDE                 | 1.099                                                        | 0.338                          | 1508.72            | 509.79             | 0.371                          | 1013.00            | 376.02             |
| A_68_P30630410 | chr16:28445868-28445912                           | NM_183064:-577           | Fgf12         | PROMOTER               | 1.098                                                        | 0.415                          | 2690.57            | 1117.09            | 0.456                          | 1866.18            | 850.76             |
| A_68_P29625865 | chr14:57676961-57677005                           | NM_016975:-200           | Gja3          | PROMOTER               | 1.098                                                        | 0.314                          | 1694.20            | 532.14             | 0.345                          | 1243.96            | 429.18             |
| A_68_P27473558 | chr10:115550897-115550941                         | NM_001161855:55          | 4933416C03Rik | INSIDE                 | 1.098                                                        | 1.773                          | 1294.54            | 2295.81            | 1.946                          | 1194.81            | 2325.58            |
| A_68_P26239285 | chr8:125856857-125856901                          | NM_172287:266            | Spire2        | INSIDE                 | 1.098                                                        | 0.297                          | 2313.91            | 686.98             | 0.326                          | 1636.59            | 533.63             |
| A_68_P24129312 | chr5:138635953-138635997                          | NM_177878:433            | Mblac1        | INSIDE                 | 1.098                                                        | 0.359                          | 1533.42            | 550.79             | 0.395                          | 1226.96            | 484.10             |
| A_68_P23547919 | chr5:25035293-25035337                            | NR_027388:-521           | 1700096K18Rik | PROMOTER               | 1.098                                                        | 0.235                          | 4048.40            | 952.43             | 0.258                          | 2923.60            | 755.33             |
| A_68_P23356008 | chr4:139665546-139665590                          | NM_198610:137158         | Igstf1        | INSIDE                 | 1.098                                                        | 0.485                          | 1011.63            | 490.22             | 0.532                          | 876.55             | 466.55             |
| A_68_P23221710 | chr4:114494540-114494590                          | NR_033617:240            | Gml2830       | INSIDE                 | 1.098                                                        | 0.286                          | 2037.43            | 582.42             | 0.314                          | 1457.85            | 457.72             |
| A_68_P31930919 | chr19:5803763-5803807                             | NR_002847:-1113          | Malat1        | PROMOTER               | 1.097                                                        | 3.896                          | 3965.50            | 15448.17           | 4.273                          | 3016.15            | 12888.07           |
| A_68_P31836528 | chr18:75526822-75526866                           | NM_001042660:-174        | Smad7         | PROMOTER               | 1.097                                                        | 2.762                          | 659.77             | 1822.55            | 3.031                          | 556.81             | 1687.88            |
| A_68_P28055831 | chr11:98209650-98209695                           | NM_144828:-379           | Ppp1r1b       | PROMOTER               | 1.097                                                        | 0.209                          | 4699.15            | 984.09             | 0.230                          | 2974.88            | 683.55             |
| A_68_P27926228 | chr11:75275176-75275220                           | NR_029739:-2019          | Mir22         | PROMOTER               | 1.097                                                        | 0.568                          | 1983.62            | 1126.03            | 0.622                          | 1511.41            | 940.82             |
| A_68_P27154487 | chr10:55835680-55835724                           | NM_001163833:8980        | Msl3l2        | INSIDE                 | 1.097                                                        | 0.414                          | 1125.30            | 465.78             | 0.454                          | 966.03             | 438.60             |
| A_68_P22970878 | chr4:63156551-63156595                            | NM_001008791:413         | Whrn          | INSIDE                 | 1.097                                                        | 0.320                          | 4175.17            | 1334.00            | 0.350                          | 2978.94            | 1043.96            |
| A_68_P22948240 | chr4:57968866-57968910                            | NM_011660:395            | Txn1          | INSIDE                 | 1.097                                                        | 0.481                          | 1318.20            | 634.60             | 0.528                          | 1162.25            | 613.90             |
| A_68_P20969135 | chr2:4525120-4525164                              | NM_001177844:44343       | Fmrd4a        | INSIDE                 | 1.097                                                        | 1.850                          | 1330.09            | 2460.61            | 2.029                          | 1111.00            | 2254.39            |
| A_68_P32786684 | chrX:158346258-158346302                          | NM_001081052:251442      | Nhs           | INSIDE                 | 1.096                                                        | 1.731                          | 472.18             | 817.43             | 1.898                          | 544.40             | 1033.34            |
| A_68_P32234206 | chrX:5977596-5977640                              | NM_001040459:356         | Shroom4       | INSIDE                 | 1.096                                                        | 1.700                          | 380.75             | 647.37             | 1.864                          | 529.35             | 986.89             |
| A_68_P29644190 | chr14:60997369-60997413                           | NM_001164705:268         | Fam123a       | INSIDE                 | 1.096                                                        | 0.275                          | 2152.09            | 590.82             | 0.301                          | 1589.37            | 478.14             |
| A_68_P28055691 | chr11:98188926-98188970                           | NM_010895:2011           | Neurod2       | INSIDE                 | 1.096                                                        | 1.674                          | 850.01             | 1423.01            | 1.835                          | 728.37             | 1336.48            |
| A_68_P26445382 | chr9:40609227-40609271                            | NM_031165:-107           | Hspa8         | PROMOTER               | 1.096                                                        | 0.251                          | 2990.86            | 750.10             | 0.275                          | 2044.34            | 561.81             |
| A_68_P25957632 | chr8:74108446-74108490                            | NM_011977:15643          | Slc27a1       | INSIDE                 | 1.096                                                        | 1.429                          | 1251.87            | 1789.33            | 1.567                          | 1039.97            | 1629.36            |
| A_68_P25728676 | chr8:26830919-26830963                            | NM_028000:421            | Ppaped1b      | INSIDE                 | 1.096                                                        | 0.284                          | 2361.12            | 671.33             | 0.312                          | 1706.32            | 531.75             |
| A_68_P25661487 | chr8:12430676-12430720                            | NR_027975:44928          | Gm5607        | INSIDE                 | 1.096                                                        | 0.306                          | 1857.02            | 567.49             | 0.335                          | 1416.91            | 474.43             |
| A_68_P25505621 | chr7:134587797-134587841                          | NM_175163:4854           | Zfp689        | INSIDE                 | 1.096                                                        | 1.910                          | 1537.70            | 2936.88            | 2.093                          | 1110.02            | 2322.87            |
| A_68_P25471457 | chr7:128125949-128125995                          | NM_028955:-50            | 4933427G17Rik | DIVERGENT_PROMOTER     | 1.096                                                        | 3.883                          | 213.15             | 827.69             | 4.255                          | 189.86             | 807.93             |
| A_68_P23571063 | chr5:30481709-30481753                            | NM_145558:-131           | Hadhb         | DIVERGENT_PROMOTER     | 1.096                                                        | 0.365                          | 1495.34            | 545.52             | 0.400                          | 1258.72            | 503.24             |
| A_68_P23245373 | chr4:119087968-119088012                          | NM_029286:136            | Ccdc30        | INSIDE                 | 1.096                                                        | 0.200                          | 2468.94            | 494.39             | 0.219                          | 1750.79            | 384.08             |
| A_68_P23005030 | chr4:69910440-69910484                            | NM_145990:160939         | Cdk5rap2      | INSIDE                 | 1.096                                                        | 2.849                          | 733.87             | 2090.82            | 3.122                          | 637.01             | 1988.64            |
| A_68_P22363132 | chr3:99058041-99058085                            | NM_009323:380            | Tbx15         | INSIDE                 | 1.096                                                        | 0.357                          | 2834.62            | 1011.03            | 0.391                          | 2038.96            | 797.38             |
| A_68_P20530739 | chr1:114313105-114313149                          |                          |               | Unknown                | 1.096                                                        | 0.520                          | 3001.77            | 1560.28            | 0.570                          | 2352.05            | 1340.04            |
| A_68_P20186988 | chr1:43155340-43155384                            | NM_001013025:105         | Tgfbtrap1     | INSIDE                 | 1.096                                                        | 0.458                          | 1741.02            | 796.82             | 0.502                          | 1475.88            | 740.35             |
| A_68_P29961930 | chr14:122873605-122873656                         | NM_009574:-975           | Zic2          | DIVERGENT_PROMOTER     | 1.095                                                        | 3.226                          | 476.11             | 1535.78            | 3.533                          | 444.03             | 1568.84            |
| A_68_P29258645 | chr13:993833273-99383317                          | AK135687:193159          |               | INSIDE                 | 1.095                                                        | 2.316                          | 432.27             | 1001.15            | 2.536                          | 396.26             | 1005.03            |
| A_68_P28185532 | chr11:120459254-120459298                         | NM_011568:403            | Thoc4         | INSIDE                 | 1.095                                                        | 1.582                          | 890.37             | 1408.65            | 1.733                          | 742.27             | 1286.33            |
| A_68_P27282702 | chr10:79819562-79819606                           | NM_183152:381            | Plk5          | INSIDE                 | 1.095                                                        | 3.493                          | 1901.32            | 6641.44            | 3.825                          | 1566.62            | 5992.95            |
| A_68_P25947576 | chr8:72149308-72149352                            | NM_001045553:-256        | Zfp868        | PROMOTER               | 1.095                                                        | 0.461                          | 4550.59            | 2099.27            | 0.505                          | 3622.75            | 1829.22            |
| A_68_P25581338 | chr7:147130178-147130222                          | NM_009482:446            | Utrf1         | INSIDE                 | 1.095                                                        | 0.426                          | 1325.00            | 565.02             | 0.467                          | 1007.99            | 470.81             |
| A_68_P24451818 | chr6:52590402-52590446                            | NM_145567:-130           | Hibadh        | PROMOTER               | 1.095                                                        | 2.511                          | 934.11             | 2345.81            | 2.749                          | 766.92             | 2108.09            |
| A_68_P24054545 | chr5:123678394-123678438                          | NM_026000:218            | Psmid9        | INSIDE                 | 1.095                                                        | 0.291                          | 2198.69            | 639.59             | 0.318                          | 1590.21            | 506.38             |
| A_68_P23820887 | chr5:77738314-77738358                            | NM_019836:775            | 2610024G14Rik | INSIDE                 | 1.095                                                        | 2.815                          | 855.65             | 2408.87            | 3.084                          | 662.39             | 2042.67            |
| A_68_P23351224 | chr4:138902115-138902159                          | NM_023536:6077           | Mrtos4        | DOWNSTREAM             | 1.095                                                        | 1.502                          | 1678.30            | 2520.00            | 1.644                          | 1346.70            | 2214.30            |
| A_68_P20633261 | chr1:136311870-136311914                          | NM_028320:-151           | Adipor1       | PROMOTER               | 1.095                                                        | 0.354                          | 1479.06            | 523.61             | 0.388                          | 1187.97            | 460.35             |

| ProbeName      | Target position of probe on CpG island microarray | TargetID               | GeneSymbol    | CpG island Description | Ratio of relative methylation (TiO <sub>2</sub> -NP/Vehicle) | Sham group                     |                    |                    | TiO <sub>2</sub> -H group      |                    |                    |
|----------------|---------------------------------------------------|------------------------|---------------|------------------------|--------------------------------------------------------------|--------------------------------|--------------------|--------------------|--------------------------------|--------------------|--------------------|
|                |                                                   |                        |               |                        |                                                              | Relative methylation (Cy5/Cy3) | Cy3 signal (Input) | Cy5 signal (MeDIP) | Relative methylation (Cy5/Cy3) | Cy3 signal (Input) | Cy5 signal (MeDIP) |
| A_68_P20165368 | chr1:39425278-39425322                            | NM_053257:605          | Rpl31         | INSIDE                 | 1.095                                                        | 0.178                          | 5773.97            | 1028.11            | 0.195                          | 3996.55            | 779.14             |
| A_68_P31891632 | chr18:85121550-85121594                           | NM_025969:-656         | 1700034H14Rik | PROMOTER               | 1.094                                                        | 0.238                          | 3185.89            | 758.94             | 0.261                          | 2489.95            | 649.08             |
| A_68_P27535082 | chr10:126727745-126727789                         | NM_007837:-82          | Ddit3         | DIVERGENT_PROMOTER     | 1.094                                                        | 0.353                          | 2060.73            | 728.15             | 0.387                          | 1694.25            | 654.91             |
| A_68_P27449324 | chr10:110943649-110943693                         | NM_009344:329          | Phlda1        | INSIDE                 | 1.094                                                        | 0.387                          | 1331.75            | 514.89             | 0.423                          | 1046.44            | 442.72             |
| A_68_P27282650 | chr10:79811706-79811750                           | NM_001113548:-537      | Adamts15      | DIVERGENT_PROMOTER     | 1.094                                                        | 0.462                          | 2525.29            | 1166.90            | 0.505                          | 1777.01            | 898.07             |
| A_68_P24385308 | chr6:39822333-39822377                            |                        |               | Unknown                | 1.094                                                        | 0.346                          | 1362.29            | 471.56             | 0.379                          | 1095.44            | 414.66             |
| A_68_P24138652 | chr5:140448047-140448091                          | NM_175522:64172        | Elfn1         | INSIDE                 | 1.094                                                        | 1.510                          | 1810.71            | 2733.60            | 1.652                          | 1293.19            | 2135.95            |
| A_68_P22737305 | chr4:12834278-12834322                            | NM_001171801:317       | Gm11818       | INSIDE                 | 1.094                                                        | 2.105                          | 344.03             | 724.34             | 2.304                          | 335.02             | 771.93             |
| A_68_P21492620 | chr2:104966668-104966712                          | NM_144783:5            | Wt1           | INSIDE                 | 1.094                                                        | 0.465                          | 1475.58            | 685.65             | 0.509                          | 1220.95            | 620.90             |
| A_68_P31412124 | chr17:86088425-86088469                           | NM_011380:-852         | Six2          | PROMOTER               | 1.093                                                        | 0.331                          | 4944.01            | 1638.69            | 0.362                          | 3497.57            | 1266.57            |
| A_68_P31256044 | chr17:56567422-56567466                           | NM_011218:48459        | Ptpns         | INSIDE                 | 1.093                                                        | 2.444                          | 907.26             | 2216.99            | 2.670                          | 695.18             | 1856.10            |
| A_68_P30424871 | chr15:89208941-89208985                           | NM_001013022:723       | Odf3b         | INSIDE                 | 1.093                                                        | 0.412                          | 1848.79            | 762.19             | 0.451                          | 1341.74            | 604.83             |
| A_68_P30370942 | chr15:80064643-80064687                           | NM_178719:155          | Smcr71        | INSIDE                 | 1.093                                                        | 0.324                          | 1843.06            | 596.98             | 0.354                          | 1430.71            | 506.28             |
| A_68_P28747156 | chr12:113205010-113205054                         | NM_027360:156          | 2010107E04Rik | INSIDE                 | 1.093                                                        | 0.437                          | 1559.85            | 681.69             | 0.478                          | 1307.09            | 624.62             |
| A_68_P28206058 | chr12:5380617-5380662                             | NM_001164493:1849      | Klhl29        | INSIDE                 | 1.093                                                        | 0.344                          | 1663.16            | 571.61             | 0.376                          | 1272.16            | 477.90             |
| A_68_P27776268 | chr11:47802068-47802112                           | ENSMUST00000128558:381 |               | INSIDE                 | 1.093                                                        | 0.392                          | 1908.83            | 748.49             | 0.429                          | 1436.68            | 615.73             |
| A_68_P25102011 | chr7:54175094-54175138                            | NM_021884:184          | Tsg101        | INSIDE                 | 1.093                                                        | 3.292                          | 1048.97            | 3453.48            | 3.599                          | 1018.88            | 3666.50            |
| A_68_P23536407 | chr5:22939195-22939239                            | NM_026984:-1030        | Mll5          | PROMOTER               | 1.093                                                        | 0.377                          | 5695.43            | 2146.94            | 0.412                          | 3839.16            | 1582.14            |
| A_68_P30348994 | chr15:76368510-76368555                           | NM_013909:644          | Fbxl6         | INSIDE                 | 1.092                                                        | 0.251                          | 1851.36            | 464.93             | 0.274                          | 1420.16            | 389.37             |
| A_68_P29050104 | chr13:54666624-54666668                           | NM_133797:97           | 4833439L19Rik | INSIDE                 | 1.092                                                        | 0.414                          | 1788.38            | 739.50             | 0.451                          | 1295.42            | 584.85             |
| A_68_P28158411 | chr11:116135230-116135274                         | NM_146032:279          | Srp68         | INSIDE                 | 1.092                                                        | 0.362                          | 1277.88            | 462.62             | 0.395                          | 969.36             | 383.06             |
| A_68_P26119099 | chr8:105308249-105308294                          | NM_009866:740          | Cdh11         | INSIDE                 | 1.092                                                        | 0.379                          | 3787.05            | 1437.03            | 0.414                          | 2835.43            | 1174.48            |
| A_68_P26065140 | chr8:94882146-94882190                            | NM_018826:474          | Irx5          | INSIDE                 | 1.092                                                        | 0.424                          | 1721.65            | 730.27             | 0.463                          | 1483.26            | 687.11             |
| A_68_P25393298 | chr7:112766252-112766301                          | NM_018880:15737        | Trim3         | INSIDE                 | 1.092                                                        | 1.709                          | 740.47             | 1265.11            | 1.866                          | 509.53             | 950.97             |
| A_68_P25005239 | chr7:25292778-25292822                            | NM_146183:695          | Zfp428        | INSIDE                 | 1.092                                                        | 0.232                          | 2253.62            | 523.27             | 0.253                          | 1783.03            | 451.99             |
| A_68_P23424872 | chr4:152806992-152807036                          | NM_001099299:49925     | Ajap1         | INSIDE                 | 1.092                                                        | 1.746                          | 1941.96            | 3389.70            | 1.906                          | 1476.20            | 2813.27            |
| A_68_P21622284 | chr2:128792983-128793027                          | NM_178404:-133         | Zc3h6         | PROMOTER               | 1.092                                                        | 0.642                          | 2733.46            | 1755.20            | 0.701                          | 2179.40            | 1527.52            |
| A_68_P21579147 | chr2:120966036-120966080                          | NM_177846:376          | Lcmt2         | INSIDE                 | 1.092                                                        | 2.586                          | 299.52             | 774.64             | 2.825                          | 265.53             | 750.00             |
| A_68_P21084949 | chr2:27330700-27330744                            | NM_023336:196          | Brd3          | INSIDE                 | 1.092                                                        | 36.589                         | 294.55             | 10777.04           | 39.942                         | 329.34             | 13154.64           |
| A_68_P20937886 | chr1:193221052-193221096                          | NM_144880:-154         | Ppp2r5a       | PROMOTER               | 1.092                                                        | 0.351                          | 1501.90            | 526.59             | 0.383                          | 1210.98            | 463.83             |
| A_68_P20852906 | chr1:178205311-178205355                          | NM_176916:111          | Pld5          | INSIDE                 | 1.092                                                        | 0.187                          | 3626.98            | 678.22             | 0.204                          | 2888.63            | 590.07             |
| A_68_P31827998 | chr18:73975355-73975399                           | NM_145494:-330         | Me2           | PROMOTER               | 1.091                                                        | 0.168                          | 3065.20            | 514.98             | 0.183                          | 2241.30            | 410.86             |
| A_68_P28751166 | chr12:113838256-113838300                         | NM_198411:-11284       | Inf2          | INSIDE                 | 1.091                                                        | 1.478                          | 1973.43            | 2915.94            | 1.612                          | 1551.98            | 2501.84            |
| A_68_P28678694 | chr12:101122653-101122697                         | NM_028354:-50          | Tdp1          | DIVERGENT_PROMOTER     | 1.091                                                        | 3.497                          | 583.81             | 2041.65            | 3.814                          | 487.52             | 1859.60            |
| A_68_P27279732 | chr10:79383697-79383741                           | NM_053244:4003         | Kiss1r        | INSIDE                 | 1.091                                                        | 0.382                          | 2203.02            | 841.97             | 0.417                          | 1766.69            | 736.92             |
| A_68_P26467271 | chr9:44187775-44187819                            | NM_021395:224          | Hyou1         | INSIDE                 | 1.091                                                        | 0.320                          | 1999.40            | 640.58             | 0.350                          | 1429.29            | 499.62             |
| A_68_P26055739 | chr8:93432325-93432369                            | NM_177224:79613        | Chd9          | INSIDE                 | 1.091                                                        | 0.398                          | 1367.22            | 543.56             | 0.434                          | 874.24             | 379.17             |
| A_68_P24620370 | chr6:88149892-88149936                            | NM_008090:1257         | Gata2         | INSIDE                 | 1.091                                                        | 0.484                          | 1163.32            | 562.49             | 0.528                          | 980.07             | 517.12             |
| A_68_P24428218 | chr6:48547068-48547112                            | NM_001079901:3209      | Repin1        | INSIDE                 | 1.091                                                        | 1.977                          | 1732.24            | 3424.73            | 2.157                          | 1357.20            | 2927.85            |
| A_68_P24084069 | chr5:129106010-129106054                          | NR_015517:530          | 5930412G12Rik | INSIDE                 | 1.091                                                        | 0.392                          | 1563.52            | 612.64             | 0.427                          | 1243.90            | 531.71             |
| A_68_P23578164 | chr5:31754796-31754840                            | NM_172993:10           | Zfp512        | INSIDE                 | 1.091                                                        | 0.522                          | 1657.99            | 865.78             | 0.569                          | 1125.51            | 640.93             |
| A_68_P31442550 | chr17:91488113-91488157                           | NM_020252:4008         | Nrxn1         | INSIDE                 | 1.090                                                        | 2.813                          | 1523.85            | 4285.90            | 3.066                          | 1204.75            | 3694.12            |
| A_68_P30345226 | chr15:75805450-75805494                           | NM_001081065:5858      | Zfp707        | INSIDE                 | 1.090                                                        | 1.765                          | 2568.19            | 4533.19            | 1.924                          | 1813.40            | 3488.97            |
| A_68_P29699005 | chr14:70475525-70475569                           | NM_018781:-1705        | Egr3          | PROMOTER               | 1.090                                                        | 1.968                          | 1533.01            | 3016.89            | 2.144                          | 1271.93            | 2727.20            |
| A_68_P28033655 | chr11:94410319-94410363                           | NM_001013381:181       | Rsad1         | INSIDE                 | 1.090                                                        | 0.310                          | 1593.23            | 494.57             | 0.338                          | 1282.65            | 434.02             |
| A_68_P27896513 | chr11:69495025-69495071                           | NM_030702:424          | Senp3         | INSIDE                 | 1.090                                                        | 0.489                          | 1219.10            | 596.18             | 0.533                          | 939.96             | 501.23             |
| A_68_P26429009 | chr9:36953011-36953055                            | NM_001029838:1819      | Pknox2        | INSIDE                 | 1.090                                                        | 0.532                          | 1721.00            | 915.53             | 0.580                          | 1359.86            | 788.39             |
| A_68_P24537461 | chr6:71582317-71582361                            | NM_173001:342          | Kdm3a         | INSIDE                 | 1.090                                                        | 0.502                          | 2426.82            | 1218.93            | 0.547                          | 1984.96            | 1086.46            |
| A_68_P23873438 | chr5:89104430-89104474                            | NM_001098476:153       | Grsf1         | INSIDE                 | 1.090                                                        | 0.464                          | 1243.29            | 576.29             | 0.505                          | 1107.67            | 559.57             |
| A_68_P23118613 | chr4:94281110-94281154                            | NM_026319:-78          | Irf7          | PROMOTER               | 1.090                                                        | 0.346                          | 2392.75            | 827.68             | 0.377                          | 1931.12            | 728.34             |
| A_68_P21752520 | chr2:152857602-152857646                          | NM_001011732:37        | Xkr7          | INSIDE                 | 1.090                                                        | 10.939                         | 1230.96            | 13465.12           | 11.922                         | 860.75             | 10262.16           |
| A_68_P32364026 | chrX:45694076-45694120                            | NM_178782:-436         | Bcor1         | PROMOTER               | 1.089                                                        | 1.526                          | 638.22             | 974.10             | 1.662                          | 949.04             | 1577.70            |
| A_68_P32321656 | chrX:34625307-34625351                            | NM_026055:-149         | Rpl39         | PROMOTER               | 1.089                                                        | 1.538                          | 480.75             | 739.47             | 1.676                          | 693.25             | 1161.72            |
| A_68_P31793419 | chr18:67883751-67883795                           | NM_001127177:503       | Ptpn2         | INSIDE                 | 1.089                                                        | 0.532                          | 1547.49            | 824.02             | 0.580                          | 1223.40            | 709.64             |
| A_68_P31746197 | chr18:59334824-59334868                           | NM_001081328:-147      | Chsy3         | PROMOTER               | 1.089                                                        | 0.383                          | 2714.26            | 1039.18            | 0.417                          | 2024.90            | 843.87             |
| A_68_P31422206 | chr17:87681968-87682012                           | NR_015506:164          | 4833418N02Rik | INSIDE                 | 1.089                                                        | 2.145                          | 1228.54            | 2635.08            | 2.337                          | 817.90             | 1911.05            |
| A_68_P31075038 | chr17:17964345-17964389                           | NR_029536:-2785        | Mir99b        | PROMOTER               | 1.089                                                        | 0.554                          | 3197.27            | 1771.20            | 0.603                          | 2365.68            | 1427.49            |
| A_68_P28577466 | chr12:81858386-81858430                           | NM_001008423:3294      | Gm1568        | INSIDE                 | 1.089                                                        | 1.743                          | 1217.63            | 2122.79            | 1.898                          | 891.81             | 1692.37            |
| A_68_P27892737 | chr11:68859470-68859514                           | NM_011496:348          | Aurkb         | INSIDE                 | 1.089                                                        | 0.492                          | 1317.45            | 648.28             | 0.536                          | 984.71             | 527.69             |
| A_68_P23931499 | chr5:101227260-101227304                          | NM_001081107:337       | Helq          | INSIDE                 | 1.089                                                        | 3.062                          | 2336.96            | 7155.12            | 3.335                          | 1882.15            | 6277.21            |
| A_68_P23349527 | chr4:138630455-138630499                          | NM_021358:228          | Htr6          | INSIDE                 | 1.089                                                        | 0.450                          | 1119.28            | 503.90             | 0.490                          | 748.15             | 366.95             |
| A_68_P23189069 | chr4:106851457-106851501                          | NM_029565:244          | Tmem59        | INSIDE                 | 1.089                                                        | 0.427                          | 2407.53            | 1027.63            | 0.465                          | 1812.78            | 842.81             |
| A_68_P22522615 | chr3:129581952-129581996                          | NM_183423:-2127        | Pla2g12a      | PROMOTER               | 1.089                                                        | 4.116                          | 5189.68            | 21360.57           | 4.484                          | 3186.84            | 14288.86           |
| A_68_P21019039 | chr2:13976814-13976858                            | NM_001012396:826       | Ptpia         | INSIDE                 | 1.089                                                        | 0.318                          | 2558.54            | 813.58             | 0.346                          | 2048.90            | 709.48             |
| A_68_P32744218 | chrX:147530920-147530964                          | NM_001164578:144       | Tsr2          | INSIDE                 | 1.088                                                        | 2.843                          | 1160.26            | 3299.17            | 3.094                          | 1368.05            | 4233.34            |

| ProbeName      | Target position of probe on CpG island microarray | TargetID              | GeneSymbol    | CpG island Description | Ratio of relative methylation (TiO <sub>2</sub> -NP/Vehicle) | Sham group                     |                    |                    | TiO <sub>2</sub> -H group      |                    |                    |
|----------------|---------------------------------------------------|-----------------------|---------------|------------------------|--------------------------------------------------------------|--------------------------------|--------------------|--------------------|--------------------------------|--------------------|--------------------|
|                |                                                   |                       |               |                        |                                                              | Relative methylation (Cy5/Cy3) | Cy3 signal (Input) | Cy5 signal (MeDIP) | Relative methylation (Cy5/Cy3) | Cy3 signal (Input) | Cy5 signal (MeDIP) |
| A_68_P3162662  | chr18:37166261-37166305                           | NM_009960:4229        | Pcdha11       | PROMOTER               | 1.088                                                        | 2.151                          | 647.88             | 1393.90            | 2.340                          | 514.41             | 1203.88            |
| A_68_P31381750 | chr17:80606382-80606426                           | NM_001195485:241      | Srsf7         | INSIDE                 | 1.088                                                        | 0.455                          | 1484.67            | 676.00             | 0.495                          | 1155.84            | 572.55             |
| A_68_P27594243 | chr11:11925830-11925874                           | NM_001177629:2122     | Grb10         | INSIDE                 | 1.088                                                        | 1.361                          | 1513.04            | 2058.64            | 1.480                          | 1249.37            | 1848.81            |
| A_68_P26801799 | chr9:106101397-106101441                          | NM_198931:-148        | Ppm1m         | PROMOTER               | 1.088                                                        | 2.407                          | 514.15             | 1237.39            | 2.619                          | 437.08             | 1144.85            |
| A_68_P26343621 | chr9:20531598-20531642                            | NM_173777:1038        | Olfn2         | INSIDE                 | 1.088                                                        | 0.493                          | 2880.07            | 1418.64            | 0.536                          | 2217.13            | 1188.74            |
| A_68_P26021881 | chr8:87308180-87308224                            | NM_001081981:-9934    | Nfix          | PROMOTER               | 1.088                                                        | 0.294                          | 1842.88            | 542.36             | 0.320                          | 1454.01            | 465.63             |
| A_68_P23451693 | chr5:4758175-4758219                              | NM_021457:20          | Fzd1          | INSIDE                 | 1.088                                                        | 1.737                          | 1410.81            | 2450.48            | 1.889                          | 1144.28            | 2161.74            |
| A_68_P23254629 | chr4:120712162-120712206                          | NM_007741:14          | Col9a2        | INSIDE                 | 1.088                                                        | 0.320                          | 1921.30            | 614.53             | 0.348                          | 1574.98            | 547.99             |
| A_68_P23239263 | chr4:117933446-117933490                          | NM_011213:30534       | Ptprf         | INSIDE                 | 1.088                                                        | 5.274                          | 3731.73            | 19679.44           | 5.738                          | 2788.33            | 15999.25           |
| A_68_P21908931 | chr2:180891580-180891624                          | NM_007906:118         | Ecf1a2        | INSIDE                 | 1.088                                                        | 1.883                          | 1528.84            | 2879.09            | 2.049                          | 1212.50            | 2484.95            |
| A_68_P20350605 | chr1:74847285-74847329                            | NM_009518:8714        | Wnt10a        | INSIDE                 | 1.088                                                        | 1.751                          | 793.91             | 1389.91            | 1.905                          | 646.81             | 1231.94            |
| A_68_P32569614 | chrX:99839705-99839761                            | NM_008832:-147        | Phka1         | PROMOTER               | 1.087                                                        | 1.882                          | 395.28             | 744.02             | 2.046                          | 439.81             | 899.70             |
| A_68_P31746196 | chr18:59334709-59334753                           | NM_001081328:-263     | Chsy3         | PROMOTER               | 1.087                                                        | 0.366                          | 2425.46            | 887.87             | 0.398                          | 1980.93            | 788.53             |
| A_68_P31243777 | chr17:53618701-53618745                           | NM_025887:164         | Rab5a         | INSIDE                 | 1.087                                                        | 0.484                          | 2132.66            | 1032.75            | 0.527                          | 1716.05            | 903.53             |
| A_68_P31099849 | chr17:24986693-24986737                           | NM_023480:533         | Fahd1         | INSIDE                 | 1.087                                                        | 1.560                          | 727.95             | 1135.31            | 1.696                          | 869.60             | 1474.55            |
| A_68_P30963194 | chr16:91485638-91485682                           | NM_010508:201         | Ifnar1        | INSIDE                 | 1.087                                                        | 1.871                          | 887.37             | 1660.34            | 2.034                          | 808.87             | 1645.06            |
| A_68_P30686668 | chr16:38562990-38563034                           | NM_001205287:86       | Tmem39a       | INSIDE                 | 1.087                                                        | 0.523                          | 1316.39            | 688.37             | 0.568                          | 1062.48            | 603.73             |
| A_68_P30284260 | chr15:64753424-64753468                           | NM_009623:412         | Adcy8         | INSIDE                 | 1.087                                                        | 0.458                          | 1459.69            | 668.99             | 0.498                          | 1180.26            | 587.85             |
| A_68_P29130721 | chr13:72100670-72100714                           | NM_010573:479         | Irx1          | INSIDE                 | 1.087                                                        | 0.612                          | 2230.77            | 1364.55            | 0.665                          | 1552.28            | 1031.98            |
| A_68_P25956632 | chr8:73905289-73905333                            | NM_010150:541         | Nr2f6         | INSIDE                 | 1.087                                                        | 2.205                          | 490.00             | 1080.41            | 2.398                          | 382.53             | 917.20             |
| A_68_P25510686 | chr7:135561251-135561295                          | NM_026418:414         | Rgs10         | INSIDE                 | 1.087                                                        | 0.441                          | 1571.72            | 693.52             | 0.480                          | 1245.21            | 597.48             |
| A_68_P25007549 | chr7:25739920-25739970                            |                       |               | Unknown                | 1.087                                                        | 0.426                          | 2230.47            | 949.36             | 0.463                          | 1651.03            | 763.67             |
| A_68_P21533268 | chr2:113057184-113057228                          | ENSMUST00000099579:-3 |               | PROMOTER               | 1.087                                                        | 3.481                          | 218.08             | 759.21             | 3.783                          | 186.79             | 706.64             |
| A_68_P31116775 | chr17:27639850-27639894                           | NM_001013385:377      | Gm4           | INSIDE                 | 1.086                                                        | 1.656                          | 1596.06            | 2643.64            | 1.799                          | 1082.44            | 1947.28            |
| A_68_P28080762 | chr11:102527342-102527386                         | NM_001127576:463      | Gm1564        | INSIDE                 | 1.086                                                        | 2.452                          | 999.72             | 2451.73            | 2.664                          | 922.71             | 2457.77            |
| A_68_P27902560 | chr11:70577738-70577782                           | NM_177565:-188        | Zfp3          | PROMOTER               | 1.086                                                        | 0.252                          | 2540.55            | 640.48             | 0.274                          | 1908.71            | 522.65             |
| A_68_P27551122 | chr11:3190063-3190107                             | NM_019574:375         | Patz1         | PROMOTER               | 1.086                                                        | 4.738                          | 2135.80            | 10118.88           | 5.146                          | 1786.05            | 9191.66            |
| A_68_P23373719 | chr4:142751586-142751630                          | NM_001081355:51004    | Prdm2         | INSIDE                 | 1.086                                                        | 0.234                          | 2409.96            | 564.70             | 0.255                          | 1905.33            | 484.91             |
| A_68_P22411088 | chr3:107989646-107989690                          | NM_001004293:416      | Amigo1        | INSIDE                 | 1.086                                                        | 0.429                          | 1042.33            | 446.93             | 0.466                          | 829.53             | 386.23             |
| A_68_P21077276 | chr2:26092871-26092915                            | NM_153559:48          | Qsox2         | INSIDE                 | 1.086                                                        | 0.521                          | 1337.89            | 696.57             | 0.566                          | 1142.26            | 646.15             |
| A_68_P32820568 | chrX:165758296-165758340                          | NM_008222:-43         | Hcex          | PROMOTER               | 1.085                                                        | 2.584                          | 365.43             | 944.24             | 2.804                          | 395.08             | 1107.74            |
| A_68_P31097159 | chr17:24551794-24551838                           | NM_001080127:197      | Rnps1         | INSIDE                 | 1.085                                                        | 0.417                          | 1904.48            | 794.59             | 0.453                          | 1501.84            | 680.13             |
| A_68_P29750655 | chr14:79700758-79700803                           | NM_025427:662         | 1190002H23Rik | INSIDE                 | 1.085                                                        | 0.370                          | 2297.81            | 849.56             | 0.401                          | 1660.79            | 666.05             |
| A_68_P28197875 | chr12:3960097-3960141                             | NM_008895:5168        | Pome          | INSIDE                 | 1.085                                                        | 0.260                          | 2222.37            | 577.75             | 0.282                          | 1673.23            | 471.93             |
| A_68_P28177062 | chr11:119161599-119161643                         | NM_138669:-263        | Eif4a3        | PROMOTER               | 1.085                                                        | 0.542                          | 1282.74            | 694.87             | 0.588                          | 1063.76            | 625.44             |
| A_68_P28068582 | chr11:100389027-100389071                         | NM_001199296:266      | Acly          | INSIDE                 | 1.085                                                        | 0.524                          | 2797.07            | 1465.22            | 0.568                          | 2081.94            | 1182.97            |
| A_68_P27843265 | chr11:60290482-60290526                           | NM_001103171:7664     | Myo15         | INSIDE                 | 1.085                                                        | 1.910                          | 493.24             | 941.89             | 2.071                          | 432.82             | 896.37             |
| A_68_P27835480 | chr11:59021879-59021923                           | NM_024210:38          | 2310033P09Rik | INSIDE                 | 1.085                                                        | 0.242                          | 2830.58            | 685.64             | 0.263                          | 2084.23            | 547.69             |
| A_68_P27635749 | chr11:21138708-21138752                           | NM_139061:-161        | Vps54         | PROMOTER               | 1.085                                                        | 0.511                          | 1122.21            | 573.48             | 0.554                          | 1013.56            | 562.00             |
| A_68_P26346148 | chr9:21049372-21049416                            | NM_053190:3493        | Slpr5         | INSIDE                 | 1.085                                                        | 0.477                          | 6400.66            | 3050.99            | 0.517                          | 4360.12            | 2254.41            |
| A_68_P25954900 | chr8:73438460-73438504                            | NM_173013:8610        | Mtap1s        | INSIDE                 | 1.085                                                        | 2.408                          | 1357.25            | 3268.62            | 2.612                          | 1008.45            | 2634.10            |
| A_68_P24053562 | chr5:123479427-123479471                          | NM_175423:14366       | Orai1         | INSIDE                 | 1.085                                                        | 2.965                          | 1690.16            | 5010.64            | 3.216                          | 1232.43            | 3963.79            |
| A_68_P21707654 | chr2:144353449-144353493                          | NM_029763:-10         | Polr3f        | DIVERGENT_PROMOTER     | 1.085                                                        | 0.262                          | 4161.37            | 1089.10            | 0.284                          | 3317.22            | 942.00             |
| A_68_P29057275 | chr13:55929910-55929954                           | NM_011097:2854        | Pitxl         | INSIDE                 | 1.084                                                        | 0.571                          | 2063.66            | 1178.87            | 0.619                          | 1535.26            | 950.94             |
| A_68_P27941031 | chr11:77845557-77845601                           | NM_183286:-236        | Dhrs13        | PROMOTER               | 1.084                                                        | 0.444                          | 3150.32            | 1399.23            | 0.481                          | 2397.66            | 1153.91            |
| A_68_P26681180 | chr9:82869404-82869448                            | NM_001081216:-330     | Phip          | PROMOTER               | 1.084                                                        | 0.474                          | 1667.26            | 789.60             | 0.514                          | 1103.21            | 566.52             |
| A_68_P26554121 | chr9:59425750-59425794                            | NM_175235:-371        | Cellf6        | PROMOTER               | 1.084                                                        | 0.161                          | 8287.80            | 1330.33            | 0.174                          | 5697.30            | 991.58             |
| A_68_P25958356 | chr8:74216542-74216586                            | NM_028189:9135        | B3gnt3        | INSIDE                 | 1.084                                                        | 0.546                          | 2269.32            | 1239.98            | 0.593                          | 1463.93            | 867.46             |
| A_68_P24834772 | chr6:127719462-127719506                          | NM_201371:-737        | Ptm8          | PROMOTER               | 1.084                                                        | 0.382                          | 2746.34            | 1050.43            | 0.415                          | 1736.38            | 720.17             |
| A_68_P23916645 | chr5:98615219-98615263                            | NM_029947:5353        | Prdm8         | INSIDE                 | 1.084                                                        | 1.759                          | 841.79             | 1480.68            | 1.907                          | 655.80             | 1250.90            |
| A_68_P23342103 | chr4:137352189-137352233                          | NM_007431:82          | Alpl          | INSIDE                 | 1.084                                                        | 2.093                          | 1062.44            | 2223.17            | 2.269                          | 990.14             | 2246.21            |
| A_68_P20830644 | chr1:173984270-173984314                          | NM_010916:3435        | Nhlh1         | INSIDE                 | 1.084                                                        | 1.684                          | 684.35             | 1152.71            | 1.826                          | 565.00             | 1031.91            |
| A_68_P20827191 | chr1:173224816-173224860                          | NM_025388:275         | Ufc1          | INSIDE                 | 1.084                                                        | 0.365                          | 2505.59            | 915.61             | 0.396                          | 1764.06            | 698.64             |
| A_68_P20229134 | chr1:52874442-52874486                            | NM_008384:68          | Inpp1         | INSIDE                 | 1.084                                                        | 0.467                          | 2183.23            | 1019.53            | 0.506                          | 1823.31            | 923.34             |
| A_68_P32364765 | chrX:45806673-45806717                            | NM_019680:9615        | Elf4          | INSIDE                 | 1.083                                                        | 2.888                          | 838.74             | 2422.12            | 3.129                          | 957.26             | 2995.10            |
| A_68_P30347361 | chr15:76124944-76124988                           | NM_001195537:103      | Gm10345       | INSIDE                 | 1.083                                                        | 0.329                          | 1923.99            | 633.26             | 0.356                          | 1509.49            | 538.07             |
| A_68_P30156695 | chr15:39775632-39775677                           | NM_172814:-351        | Lrp12         | PROMOTER               | 1.083                                                        | 1.921                          | 762.17             | 1464.23            | 2.080                          | 671.18             | 1395.99            |
| A_68_P29613710 | chr14:55305167-55305211                           | NM_021437:181         | 1700123O20Rik | INSIDE                 | 1.083                                                        | 0.384                          | 1366.67            | 524.42             | 0.415                          | 1157.80            | 481.04             |
| A_68_P29154208 | chr13:76522545-76522589                           | NM_030174:158         | Mctp1         | INSIDE                 | 1.083                                                        | 0.474                          | 943.33             | 447.29             | 0.514                          | 814.28             | 418.25             |
| A_68_P28889017 | chr13:24893261-24893305                           | NM_024473:-243        | BC005537      | PROMOTER               | 1.083                                                        | 0.283                          | 3720.51            | 1054.58            | 0.307                          | 2497.52            | 767.02             |
| A_68_P26329352 | chr9:16306770-16306815                            |                       |               | Unknown                | 1.083                                                        | 0.588                          | 1532.89            | 900.90             | 0.637                          | 1249.12            | 795.24             |
| A_68_P26037061 | chr8:90304956-90305000                            | NM_033327:178516      | Zfp423        | INSIDE                 | 1.083                                                        | 2.057                          | 857.52             | 1763.85            | 2.228                          | 792.07             | 1764.39            |
| A_68_P25047615 | chr7:35904906-35904950                            | NM_007678:617         | Cebpa         | INSIDE                 | 1.083                                                        | 0.475                          | 2392.34            | 1137.34            | 0.515                          | 1928.02            | 992.31             |
| A_68_P25021325 | chr7:29135852-29135896                            | NR_028129:-684        | LOC100302567  | PROMOTER               | 1.083                                                        | 1.491                          | 1820.87            | 2714.46            | 1.614                          | 1405.40            | 2268.44            |
| A_68_P22286828 | chr3:83568363-83568407                            | NM_009144:-1858       | Sfrp2         | PROMOTER               | 1.083                                                        | 0.472                          | 1165.22            | 550.08             | 0.511                          | 995.49             | 508.92             |

| ProbeName      | Target position of probe on CpG island microarray | TargetID                | GeneSymbol    | CpG island Description | Ratio of relative methylation (TiO <sub>2</sub> -NP/Vehicle) | Sham group                     |                    |                    | TiO <sub>2</sub> -H group      |                    |                    |
|----------------|---------------------------------------------------|-------------------------|---------------|------------------------|--------------------------------------------------------------|--------------------------------|--------------------|--------------------|--------------------------------|--------------------|--------------------|
|                |                                                   |                         |               |                        |                                                              | Relative methylation (Cy5/Cy3) | Cy3 signal (Input) | Cy5 signal (MeDIP) | Relative methylation (Cy5/Cy3) | Cy3 signal (Input) | Cy5 signal (MeDIP) |
| A_68_P20189690 | chr1:43610952-43610996                            | NM_010879:108379        | Nck2          | INSIDE                 | 1.083                                                        | 1.611                          | 845.62             | 1362.71            | 1.746                          | 623.47             | 1088.41            |
| A_68_P32326382 | chrX:35474320-35474364                            | NM_001185002:326        | Rhox13        | INSIDE                 | 1.082                                                        | 1.973                          | 432.09             | 852.51             | 2.134                          | 762.89             | 1628.18            |
| A_68_P31144956 | chr17:32457857-32457902                           | NM_019774:219           | Akap8         | INSIDE                 | 1.082                                                        | 0.323                          | 1591.42            | 514.37             | 0.350                          | 1213.17            | 424.40             |
| A_68_P31022091 | chr17:6256702-6256746                             | ENSMUST00000121576:2822 |               | DOWNSTREAM             | 1.082                                                        | 0.210                          | 2571.74            | 540.08             | 0.227                          | 2024.50            | 460.08             |
| A_68_P30811312 | chr16:62846773-62846817                           | NM_026577:72            | Arl13b        | INSIDE                 | 1.082                                                        | 0.331                          | 2951.83            | 976.86             | 0.358                          | 2175.36            | 778.79             |
| A_68_P28601431 | chr12:86311677-86311721                           | NM_178065:138           | 1110018G07Rik | INSIDE                 | 1.082                                                        | 0.564                          | 2717.44            | 1532.18            | 0.610                          | 2038.78            | 1243.25            |
| A_68_P27093482 | chr10:41917067-41917111                           | NM_019740:79460         | Foxo3         | INSIDE                 | 1.082                                                        | 2.039                          | 1209.71            | 2467.19            | 2.207                          | 929.74             | 2052.11            |
| A_68_P26885917 | chr9:121748367-121748412                          | NM_028384:190           | Ccdc13        | INSIDE                 | 1.082                                                        | 0.449                          | 1305.50            | 586.37             | 0.486                          | 980.83             | 476.83             |
| A_68_P26749720 | chr9:96790099-96790143                            | NM_153420:-279          | Acp12         | PROMOTER               | 1.082                                                        | 3.270                          | 717.07             | 2344.86            | 3.537                          | 628.12             | 2221.39            |
| A_68_P26228654 | chr8:124277231-124277275                          | NM_020605:22794         | Jph3          | INSIDE                 | 1.082                                                        | 2.388                          | 1181.74            | 2821.82            | 2.585                          | 965.62             | 2495.70            |
| A_68_P25616319 | chr8:4166672-4166716                              | NM_001039578:128        | Evi5l         | INSIDE                 | 1.082                                                        | 0.414                          | 3135.72            | 1298.39            | 0.448                          | 2403.84            | 1076.64            |
| A_68_P25615118 | chr8:3676568-3676612                              | NM_025701:114           | Trappc5       | INSIDE                 | 1.082                                                        | 0.479                          | 964.33             | 462.11             | 0.518                          | 863.47             | 447.64             |
| A_68_P25393299 | chr7:112766364-112766408                          | NM_018880:15627         | Trim3         | INSIDE                 | 1.082                                                        | 2.166                          | 1023.22            | 2216.48            | 2.344                          | 760.54             | 1782.85            |
| A_68_P24126247 | chr5:137972597-137972641                          | NM_010312:1839          | Gnb2          | INSIDE                 | 1.082                                                        | 2.834                          | 513.34             | 1455.01            | 3.067                          | 419.07             | 1285.31            |
| A_68_P22405708 | chr3:107135601-107135645                          | NM_001045807:585        | Rbm15         | INSIDE                 | 1.082                                                        | 0.333                          | 1512.52            | 503.85             | 0.361                          | 1262.53            | 455.16             |
| A_68_P22336402 | chr3:93248746-93248790                            | NM_001163098:2517       | Tchh          | INSIDE                 | 1.082                                                        | 0.399                          | 1783.91            | 711.51             | 0.432                          | 1369.57            | 591.30             |
| A_68_P22009691 | chr3:27052647-27052692                            | NM_001177625:107        | Ect2          | INSIDE                 | 1.082                                                        | 0.515                          | 1996.67            | 1027.36            | 0.557                          | 1410.66            | 785.19             |
| A_68_P21843325 | chr2:168577925-168577969                          | NM_175303:14755         | Sall4         | INSIDE                 | 1.082                                                        | 2.358                          | 1449.80            | 3418.38            | 2.551                          | 1110.51            | 2833.01            |
| A_68_P20779533 | chr1:164670297-164670341                          | NM_001081290:369        | Prc2c         | INSIDE                 | 1.082                                                        | 1.606                          | 898.75             | 1443.53            | 1.738                          | 749.51             | 1302.87            |
| A_68_P32319552 | chrX:34185014-34185058                            | NM_001081956:373        | Akap17b       | INSIDE                 | 1.081                                                        | 1.895                          | 435.82             | 825.90             | 2.049                          | 564.81             | 1157.11            |
| A_68_P31201698 | chr17:45681700-45681744                           | NM_001013749:4904       | Tmem151b      | INSIDE                 | 1.081                                                        | 1.690                          | 720.68             | 1218.15            | 1.827                          | 565.03             | 1032.47            |
| A_68_P30960423 | chr16:91011703-91011747                           | NM_001164483:-171       | Synj1         | PROMOTER               | 1.081                                                        | 0.528                          | 2229.39            | 1177.59            | 0.571                          | 1725.34            | 985.31             |
| A_68_P28514078 | chr12:70457923-70457967                           | NM_025441:209           | Nemf          | INSIDE                 | 1.081                                                        | 2.715                          | 595.14             | 1615.50            | 2.934                          | 464.41             | 1362.56            |
| A_68_P26781225 | chr9:102528131-102528175                          | NM_001081122:302        | Cep63         | INSIDE                 | 1.081                                                        | 2.222                          | 2116.69            | 4703.14            | 2.403                          | 1709.51            | 4107.14            |
| A_68_P24617811 | chr6:87680675-87680719                            | NM_001159697:-166       | Ccdc48        | PROMOTER               | 1.081                                                        | 0.156                          | 4868.17            | 761.81             | 0.169                          | 3237.31            | 547.61             |
| A_68_P24218731 | chr6:6813573-6813617                              | NM_010057:261           | Dlx6          | INSIDE                 | 1.081                                                        | 0.298                          | 4312.27            | 1286.66            | 0.322                          | 3187.23            | 1027.77            |
| A_68_P23396587 | chr4:148180164-148180208                          | NM_027195:1686          | Cas2l         | INSIDE                 | 1.081                                                        | 0.437                          | 3747.67            | 1637.11            | 0.472                          | 2862.22            | 1351.55            |
| A_68_P22383500 | chr3:102739435-102739479                          | NM_011516:567           | Sypc1         | INSIDE                 | 1.081                                                        | 4.506                          | 948.02             | 4272.17            | 4.871                          | 750.73             | 3656.63            |
| A_68_P21839349 | chr2:167906063-167906107                          | NM_021409:-419          | Pard6b        | PROMOTER               | 1.081                                                        | 0.331                          | 1880.23            | 621.57             | 0.357                          | 1358.09            | 485.26             |
| A_68_P21611137 | chr2:126834338-126834382                          | NM_175550:-86           | Ap4c1         | PROMOTER               | 1.081                                                        | 0.345                          | 3064.52            | 1057.77            | 0.373                          | 2207.13            | 823.21             |
| A_68_P32561248 | chrX:97972645-97972689                            | NM_001177780:57         | Dlg3          | INSIDE                 | 1.080                                                        | 2.114                          | 490.02             | 1036.06            | 2.283                          | 663.38             | 1514.31            |
| A_68_P31873837 | chr18:82113134-82113178                           | AK046168:311            |               | INSIDE                 | 1.080                                                        | 1.830                          | 1409.22            | 2578.36            | 1.975                          | 1099.17            | 2171.39            |
| A_68_P31351685 | chr17:74888837-74888881                           | NM_026417:26            | Yipf4         | INSIDE                 | 1.080                                                        | 0.519                          | 2166.44            | 1124.19            | 0.560                          | 1756.19            | 984.15             |
| A_68_P31096038 | chr17:24342160-24342204                           | NM_001163847:325        | Tbc1d24       | INSIDE                 | 1.080                                                        | 0.255                          | 4961.69            | 1267.46            | 0.276                          | 3116.90            | 859.74             |
| A_68_P30574557 | chr16:17576828-17576872                           | NM_144852:-86           | Slc7a4        | PROMOTER               | 1.080                                                        | 0.383                          | 1665.39            | 637.05             | 0.413                          | 1167.23            | 482.21             |
| A_68_P30357051 | chr15:77825627-77825674                           | NM_007583:124060        | Cacng2        | INSIDE                 | 1.080                                                        | 2.408                          | 521.86             | 1256.73            | 2.602                          | 407.89             | 1061.31            |
| A_68_P30135995 | chr15:35867423-35867467                           | NM_053071:557           | Cox6c         | INSIDE                 | 1.080                                                        | 0.353                          | 2594.78            | 916.61             | 0.381                          | 2155.84            | 822.29             |
| A_68_P29348447 | chr13:115608397-115608441                         | NM_001113374:-26        | Mocs2         | PROMOTER               | 1.080                                                        | 0.251                          | 2621.79            | 658.31             | 0.271                          | 1892.39            | 513.22             |
| A_68_P28613112 | chr12:88288445-88288489                           | NM_173735:174           | 2310044G17Rik | INSIDE                 | 1.080                                                        | 0.619                          | 2602.17            | 1609.59            | 0.668                          | 1991.17            | 1330.20            |
| A_68_P28149795 | chr11:114653533-114653577                         | NM_028055:3652          | Btd17         | INSIDE                 | 1.080                                                        | 0.484                          | 1016.99            | 492.43             | 0.523                          | 866.33             | 452.96             |
| A_68_P26742254 | chr9:95411930-95411974                            | NM_001114977:463        | 2610101N10Rik | INSIDE                 | 1.080                                                        | 0.540                          | 4068.97            | 2197.61            | 0.583                          | 2775.46            | 1618.40            |
| A_68_P26154343 | chr8:111480556-111480607                          | NM_007496:242038        | Zfx3          | INSIDE                 | 1.080                                                        | 1.973                          | 7636.56            | 15065.37           | 2.131                          | 4838.45            | 10309.00           |
| A_68_P25948616 | chr8:72426603-72426647                            | NM_023312:-167          | Ndufa13       | PROMOTER               | 1.080                                                        | 0.393                          | 1460.22            | 573.21             | 0.424                          | 983.77             | 417.22             |
| A_68_P24874567 | chr6:136765429-136765473                          | NM_021714:11287         | Wbp11         | INSIDE                 | 1.080                                                        | 1.711                          | 1736.79            | 2972.44            | 1.848                          | 1527.97            | 2824.33            |
| A_68_P24707915 | chr6:103462130-103462174                          | NM_007697:1283          | Chl1          | INSIDE                 | 1.080                                                        | 0.377                          | 2515.16            | 948.72             | 0.407                          | 1787.39            | 728.26             |
| A_68_P24624900 | chr6:88852416-88852460                            | NM_011906:194           | Tpra1         | INSIDE                 | 1.080                                                        | 0.279                          | 1893.30            | 528.33             | 0.301                          | 1422.46            | 428.69             |
| A_68_P23120295 | chr4:94645754-94645798                            | NM_177239:15            | Mysm1         | INSIDE                 | 1.080                                                        | 0.411                          | 1371.96            | 563.73             | 0.444                          | 1003.74            | 445.52             |
| A_68_P22964668 | chr4:62141329-62141373                            | NM_138653:250           | Bspry         | INSIDE                 | 1.080                                                        | 0.534                          | 1280.63            | 684.01             | 0.577                          | 1019.43            | 587.92             |
| A_68_P22592456 | chr3:142428233-142428277                          | NM_145546:44            | Gtf2b         | INSIDE                 | 1.080                                                        | 0.472                          | 1130.99            | 533.27             | 0.509                          | 945.80             | 481.48             |
| A_68_P21751448 | chr2:152657132-152657176                          | NM_009743:264           | Bcl2l1        | INSIDE                 | 1.080                                                        | 1.960                          | 573.83             | 1124.97            | 2.117                          | 549.94             | 1164.17            |
| A_68_P30630406 | chr16:28445546-28445590                           | NM_183064:-255          | Fgf12         | PROMOTER               | 1.079                                                        | 3.544                          | 1409.96            | 4997.31            | 3.826                          | 1071.05            | 4097.38            |
| A_68_P27894658 | chr11:69182004-69182048                           | NM_146019:902           | Chd3          | INSIDE                 | 1.079                                                        | 0.391                          | 2427.30            | 948.07             | 0.422                          | 1715.05            | 722.98             |
| A_68_P25591879 | chr7:149136030-149136074                          | NM_001009929:62         | Brsk2         | INSIDE                 | 1.079                                                        | 0.318                          | 2015.11            | 640.32             | 0.343                          | 1645.01            | 563.98             |
| A_68_P25369176 | chr7:107855309-107855353                          | NM_178764:115           | Fam168a       | INSIDE                 | 1.079                                                        | 0.407                          | 1349.59            | 548.88             | 0.439                          | 1165.19            | 511.40             |
| A_68_P25353646 | chr7:105227755-105227799                          | NM_008663:40227         | Myo7a         | INSIDE                 | 1.079                                                        | 1.694                          | 1062.03            | 1798.58            | 1.827                          | 850.38             | 1553.93            |
| A_68_P24602877 | chr6:85019040-85019084                            | NM_177077:445           | Exoc6b        | INSIDE                 | 1.079                                                        | 0.327                          | 1390.53            | 454.42             | 0.352                          | 1113.01            | 392.30             |
| A_68_P24158346 | chr5:144578888-144578932                          | NM_013557:250           | Eif2ak1       | INSIDE                 | 1.079                                                        | 0.211                          | 3260.08            | 689.36             | 0.228                          | 2225.89            | 507.66             |
| A_68_P24085130 | chr5:129287884-129287928                          | NM_001081388:171331     | Rimbp2        | INSIDE                 | 1.079                                                        | 1.512                          | 1227.92            | 1857.20            | 1.631                          | 985.93             | 1608.48            |
| A_68_P22963157 | chr4:61869358-61869402                            | NM_009554:200           | Zfp37         | INSIDE                 | 1.079                                                        | 0.255                          | 3607.12            | 919.17             | 0.275                          | 2976.63            | 818.32             |
| A_68_P21874766 | chr2:174156274-174156318                          | NM_001077510:707        | Gnas          | INSIDE                 | 1.079                                                        | 0.329                          | 2042.93            | 671.28             | 0.355                          | 1537.23            | 545.27             |
| A_68_P21489530 | chr2:104334257-104334301                          | NM_001145824:368        | Hipk3         | INSIDE                 | 1.079                                                        | 0.510                          | 3337.49            | 1702.31            | 0.550                          | 2145.51            | 1108.32            |
| A_68_P20510205 | chr1:108656151-108656195                          | NM_027534:147           | Kdsr          | INSIDE                 | 1.079                                                        | 0.464                          | 1680.30            | 780.28             | 0.501                          | 1194.12            | 598.49             |
| A_68_P32395552 | chrX:53627636-53627680                            | NR_028086:-104          | Ncna00086     | PROMOTER               | 1.078                                                        | 1.413                          | 2375.02            | 3355.74            | 1.523                          | 3128.62            | 4764.24            |
| A_68_P32136711 | chr19:45217923-45217967                           | NM_021901:-7260         | Tlx1          | PROMOTER               | 1.078                                                        | 0.480                          | 1647.73            | 790.90             | 0.517                          | 1244.43            | 643.77             |
| A_68_P31933968 | chr19:6320770-6320814                             | NM_001033342:14336      | Cdc42bpg      | INSIDE                 | 1.078                                                        | 1.574                          | 861.45             | 1355.80            | 1.697                          | 715.08             | 1213.41            |

| ProbeName      | Target position of probe on CpG island microarray | TargetID           | GeneSymbol    | CpG island Description | Ratio of relative methylation (TiO <sub>2</sub> -NP/Vehicle) | Sham group                     |                    |                    | TiO <sub>2</sub> -H group      |                    |                    |
|----------------|---------------------------------------------------|--------------------|---------------|------------------------|--------------------------------------------------------------|--------------------------------|--------------------|--------------------|--------------------------------|--------------------|--------------------|
|                |                                                   |                    |               |                        |                                                              | Relative methylation (Cy5/Cy3) | Cy3 signal (Input) | Cy5 signal (MeDIP) | Relative methylation (Cy5/Cy3) | Cy3 signal (Input) | Cy5 signal (MeDIP) |
| A_68_P31866349 | chr18:80910082-80910126                           | NM_001164110:-294  | Nfatc1        | PROMOTER               | 1.078                                                        | 0.190                          | 2445.14            | 465.55             | 0.205                          | 1879.35            | 385.73             |
| A_68_P30476457 | chr15:98620052-98620096                           | NM_021279:-213     | Wnt1          | PROMOTER               | 1.078                                                        | 0.214                          | 3307.21            | 708.66             | 0.231                          | 2433.98            | 562.18             |
| A_68_P29453038 | chr14:22320578-22320622                           | NM_017479:1594     | Myst4         | INSIDE                 | 1.078                                                        | 9.192                          | 6178.05            | 56787.98           | 9.905                          | 4311.08            | 42700.71           |
| A_68_P28189463 | chr11:121098621-121098665                         | NM_026272:-93      | Narf          | INSIDE                 | 1.078                                                        | 0.267                          | 1700.56            | 454.30             | 0.288                          | 1120.76            | 322.70             |
| A_68_P27985585 | chr11:85651342-85651386                           | NM_009324:5248     | Tbx2          | INSIDE                 | 1.078                                                        | 3.250                          | 697.89             | 2268.40            | 3.505                          | 559.88             | 1962.46            |
| A_68_P27291025 | chr10:81106120-81106164                           | NM_027480:14858    | Ankrd24       | INSIDE                 | 1.078                                                        | 0.569                          | 2514.66            | 1430.12            | 0.613                          | 1977.73            | 1212.45            |
| A_68_P26346144 | chr9:21048991-21049035                            | NM_053190:3875     | Slpr5         | INSIDE                 | 1.078                                                        | 0.373                          | 3283.12            | 1225.46            | 0.403                          | 2539.18            | 1022.02            |
| A_68_P25574802 | chr7:146101366-146101410                          | NM_009760:-199     | Bnip3         | PROMOTER               | 1.078                                                        | 0.274                          | 8279.31            | 2269.63            | 0.295                          | 5830.81            | 1722.99            |
| A_68_P25511160 | chr7:135666886-135666930                          | NM_013863:-188     | Bag3          | PROMOTER               | 1.078                                                        | 0.501                          | 1736.97            | 870.65             | 0.540                          | 1244.47            | 672.33             |
| A_68_P24908452 | chr6:143048181-143048225                          | NM_001109688:425   | 5730419I09Rik | INSIDE                 | 1.078                                                        | 0.271                          | 2181.47            | 592.15             | 0.293                          | 1787.60            | 523.05             |
| A_68_P23409061 | chr4:150288454-150288498                          | NM_020569:-4446    | Park7         | DIVERGENT_PROMOTER     | 1.078                                                        | 0.581                          | 1481.44            | 860.03             | 0.626                          | 1241.92            | 776.89             |
| A_68_P22650017 | chr3:152003054-152003098                          | NM_001162375:295   | Fam73a        | INSIDE                 | 1.078                                                        | 0.485                          | 1123.32            | 545.16             | 0.523                          | 881.66             | 461.13             |
| A_68_P32143075 | chr19:46380056-46380100                           | NM_019408:-106     | Nfkb2         | PROMOTER               | 1.077                                                        | 0.445                          | 1319.88            | 587.27             | 0.479                          | 1196.35            | 573.56             |
| A_68_P27643055 | chr11:22759832-22759876                           | NM_016888:-119     | B3gnt2        | PROMOTER               | 1.077                                                        | 0.467                          | 2682.06            | 1251.36            | 0.502                          | 2057.55            | 1033.79            |
| A_68_P27259219 | chr10:75356127-75356171                           | NM_024440:6        | Derl3         | INSIDE                 | 1.077                                                        | 0.274                          | 1895.51            | 519.40             | 0.295                          | 1209.34            | 357.00             |
| A_68_P27143973 | chr10:53471309-53471353                           | NM_001081428:-615  | Fam184a       | PROMOTER               | 1.077                                                        | 0.239                          | 6424.40            | 1537.55            | 0.258                          | 4570.42            | 1177.58            |
| A_68_P26075129 | chr8:96561318-96561362                            | NM_001093757:243   | Ogfd1         | INSIDE                 | 1.077                                                        | 0.326                          | 2197.33            | 717.07             | 0.352                          | 1794.21            | 630.81             |
| A_68_P23991126 | chr5:112706061-112706105                          | NM_009419:356      | Tpst2         | INSIDE                 | 1.077                                                        | 0.350                          | 2245.69            | 786.85             | 0.377                          | 1565.61            | 590.90             |
| A_68_P23155322 | chr4:101169271-101169315                          | NM_198412:40       | Dnajc6        | INSIDE                 | 1.077                                                        | 0.250                          | 1784.58            | 445.81             | 0.269                          | 1397.80            | 376.06             |
| A_68_P22503482 | chr3:126300061-126300105                          | NM_001025438:192   | Camk2d        | INSIDE                 | 1.077                                                        | 1.518                          | 1060.31            | 1610.04            | 1.636                          | 913.63             | 1494.61            |
| A_68_P21579145 | chr2:120965882-120965926                          | NM_177846:530      | Lcmt2         | INSIDE                 | 1.077                                                        | 2.313                          | 631.34             | 1460.50            | 2.492                          | 532.97             | 1328.15            |
| A_68_P21258085 | chr2:60221190-60221234                            | NM_013825:76       | Ly75          | INSIDE                 | 1.077                                                        | 0.264                          | 3884.30            | 1023.85            | 0.284                          | 2806.16            | 796.66             |
| A_68_P31934227 | chr19:6364618-6364662                             | NM_001110791:951   | Sfl           | INSIDE                 | 1.076                                                        | 1.811                          | 832.39             | 1507.14            | 1.949                          | 684.50             | 1333.94            |
| A_68_P31544269 | chr18:21458728-21458772                           | NM_001033445:-110  | Fam59a        | PROMOTER               | 1.076                                                        | 0.421                          | 1299.33            | 547.37             | 0.453                          | 1163.44            | 527.32             |
| A_68_P31515574 | chr18:15220674-15220718                           | NM_001142731:1395  | Kctd1         | INSIDE                 | 1.076                                                        | 0.409                          | 2802.51            | 1146.47            | 0.440                          | 2137.33            | 940.48             |
| A_68_P31092956 | chr17:23810793-23810838                           | NM_001008425:-78   | Thoc6         | PROMOTER               | 1.076                                                        | 0.333                          | 1725.93            | 574.68             | 0.358                          | 1342.02            | 480.78             |
| A_68_P29228406 | chr13:94073700-94073744                           | NM_011982:-727     | Homer1        | PROMOTER               | 1.076                                                        | 1.989                          | 597.90             | 1189.27            | 2.140                          | 417.28             | 892.81             |
| A_68_P25168660 | chr7:69493069-69493113                            | NM_010882:-72      | Ndn           | PROMOTER               | 1.076                                                        | 0.473                          | 1659.56            | 785.53             | 0.510                          | 1281.97            | 653.19             |
| A_68_P23468798 | chr5:8623006-8623050                              | NM_198620:-76      | Rundc3b       | PROMOTER               | 1.076                                                        | 0.234                          | 2551.77            | 595.85             | 0.251                          | 2005.27            | 503.97             |
| A_68_P22305771 | chr3:86723508-86723553                            | NM_001195496:1276  | Dclt2         | INSIDE                 | 1.076                                                        | 0.450                          | 1242.93            | 559.86             | 0.485                          | 940.00             | 455.61             |
| A_68_P20141347 | chr1:34987195-34987239                            |                    |               | Unknown                | 1.076                                                        | 1.742                          | 1267.15            | 2207.24            | 1.875                          | 1031.52            | 1933.96            |
| A_68_P31781216 | chr18:65590296-65590340                           | NM_172833:-332     | Malt1         | PROMOTER               | 1.075                                                        | 4.459                          | 3003.21            | 13391.98           | 4.794                          | 2138.67            | 10253.36           |
| A_68_P31601519 | chr18:32322742-32322786                           | NM_011946:22       | Map3k2        | INSIDE                 | 1.075                                                        | 1.674                          | 980.22             | 1640.54            | 1.799                          | 876.16             | 1576.39            |
| A_68_P31556683 | chr18:23910867-23910911                           | NM_001162941:-1337 | Mapre2        | PROMOTER               | 1.075                                                        | 0.294                          | 1554.52            | 456.41             | 0.316                          | 1148.25            | 362.31             |
| A_68_P29855885 | chr14:102007169-102007213                         | NM_001081278:1218  | Tbc1d4        | INSIDE                 | 1.075                                                        | 0.303                          | 2758.90            | 835.00             | 0.325                          | 1605.49            | 522.16             |
| A_68_P28549414 | chr12:76696397-76696441                           | NM_012024:769      | Ppp2r5e       | INSIDE                 | 1.075                                                        | 0.545                          | 1370.97            | 747.39             | 0.586                          | 1042.60            | 610.83             |
| A_68_P28047528 | chr11:96777981-96778025                           | NM_030248:-207     | Cdk5rap3      | PROMOTER               | 1.075                                                        | 0.341                          | 1665.59            | 568.09             | 0.367                          | 1284.68            | 470.92             |
| A_68_P28032140 | chr11:94189670-94189714                           | NM_146024:378      | Ankrd40       | INSIDE                 | 1.075                                                        | 0.231                          | 4084.29            | 944.56             | 0.249                          | 2805.86            | 697.73             |
| A_68_P27673731 | chr11:29147082-29147126                           | NM_025740:168      | Ccdc104       | INSIDE                 | 1.075                                                        | 0.408                          | 2810.35            | 1147.13            | 0.439                          | 2290.80            | 1004.88            |
| A_68_P26579683 | chr9:63870481-63870525                            | NM_008542:-636     | Smad6         | PROMOTER               | 1.075                                                        | 2.648                          | 3147.92            | 8337.02            | 2.848                          | 2373.94            | 6761.53            |
| A_68_P24859169 | chr6:133985084-133985128                          | NM_007961:-618     | Etv6          | PROMOTER               | 1.075                                                        | 1.848                          | 1760.97            | 3253.99            | 1.986                          | 1491.83            | 2962.50            |
| A_68_P23985662 | chr5:111847249-111847293                          | NM_001081235:85    | Mn1           | INSIDE                 | 1.075                                                        | 0.457                          | 1647.69            | 752.25             | 0.491                          | 1182.17            | 580.08             |
| A_68_P23333245 | chr4:135867254-135867298                          | NM_028871:386      | Hnmp1         | INSIDE                 | 1.075                                                        | 1.518                          | 1297.93            | 1970.65            | 1.633                          | 927.50             | 1514.48            |
| A_68_P22503487 | chr3:126300546-126300590                          | NM_001025438:678   | Camk2d        | INSIDE                 | 1.075                                                        | 0.256                          | 2135.74            | 547.14             | 0.275                          | 1741.73            | 479.62             |
| A_68_P21085075 | chr2:27370596-27370640                            | NM_080848:-48      | Wdr5          | PROMOTER               | 1.075                                                        | 0.275                          | 5374.91            | 1476.11            | 0.295                          | 3630.20            | 1071.81            |
| A_68_P20744278 | chr1:158604428-158604472                          | NM_023141:20       | Tor3a         | INSIDE                 | 1.075                                                        | 0.420                          | 1469.93            | 616.90             | 0.451                          | 1202.73            | 542.72             |
| A_68_P20293018 | chr1:64580121-64580165                            | NM_001037726:765   | Creb1         | INSIDE                 | 1.075                                                        | 2.176                          | 1123.34            | 2444.72            | 2.339                          | 905.77             | 2118.17            |
| A_68_P20091642 | chr1:24106929-24106973                            | NM_026604:230      | Fam135a       | INSIDE                 | 1.075                                                        | 0.385                          | 1744.14            | 671.69             | 0.414                          | 1476.55            | 611.24             |
| A_68_P30964221 | chr16:91660638-91660682                           | NM_019973:12592    | Fanl          | INSIDE                 | 1.074                                                        | 1.397                          | 5134.84            | 7170.97            | 1.500                          | 4066.06            | 6098.78            |
| A_68_P28944867 | chr13:35832810-35832854                           | NM_001123386:-438  | Cdyl          | PROMOTER               | 1.074                                                        | 0.316                          | 1521.82            | 480.88             | 0.340                          | 1243.04            | 422.02             |
| A_68_P28513155 | chr12:70269942-70269986                           | NM_001081406:164   | Lrr1          | INSIDE                 | 1.074                                                        | 0.393                          | 1683.75            | 662.36             | 0.422                          | 1372.18            | 579.61             |
| A_68_P28206064 | chr12:5381209-5381253                             | NM_001164493:1258  | Kihl29        | INSIDE                 | 1.074                                                        | 0.357                          | 2234.46            | 796.59             | 0.383                          | 1577.86            | 603.93             |
| A_68_P27288863 | chr10:80785224-80785268                           | NM_027381:1399     | 2510012J08Rik | INSIDE                 | 1.074                                                        | 1.590                          | 1333.79            | 2120.61            | 1.708                          | 1006.32            | 1718.65            |
| A_68_P27285904 | chr10:80317637-80317681                           | NM_025349:296      | Lsm7          | INSIDE                 | 1.074                                                        | 0.270                          | 2925.45            | 791.05             | 0.290                          | 1902.09            | 552.24             |
| A_68_P25452562 | chr7:124525096-124525140                          | NM_175645:626      | Xylt1         | INSIDE                 | 1.074                                                        | 0.478                          | 982.50             | 469.21             | 0.513                          | 784.13             | 402.14             |
| A_68_P21842273 | chr2:168396596-168396647                          | NM_001136073:19070 | Nfatc2        | INSIDE                 | 1.074                                                        | 5.445                          | 465.08             | 2532.48            | 5.849                          | 283.33             | 1657.11            |
| A_68_P21603045 | chr2:125332058-125332102                          | NM_007993:94       | Fbn1          | INSIDE                 | 1.074                                                        | 0.600                          | 1922.41            | 1154.37            | 0.645                          | 1612.80            | 1040.39            |
| A_68_P20937880 | chr1:193219969-193220013                          | NM_144880:930      | Ppp2r5a       | INSIDE                 | 1.074                                                        | 0.432                          | 3125.08            | 1349.93            | 0.464                          | 2190.86            | 1016.38            |
| A_68_P31150390 | chr17:33896983-33897027                           | NM_008997:427      | Rab11b        | INSIDE                 | 1.073                                                        | 0.216                          | 3806.65            | 820.57             | 0.231                          | 2906.55            | 672.03             |
| A_68_P30337591 | chr15:74346432-74346476                           | NM_174991:-171     | Bai1          | PROMOTER               | 1.073                                                        | 0.326                          | 1668.45            | 544.01             | 0.350                          | 1212.73            | 424.47             |
| A_68_P28732761 | chr12:110697987-110698031                         | NM_001190703:6344  | Dlk1          | INSIDE                 | 1.073                                                        | 1.673                          | 1351.04            | 2259.69            | 1.795                          | 1083.40            | 1944.97            |
| A_68_P27612233 | chr11:16652100-16652144                           | NM_007912:-83      | Egfr          | PROMOTER               | 1.073                                                        | 0.151                          | 3925.46            | 591.11             | 0.162                          | 2975.92            | 480.97             |
| A_68_P26765225 | chr9:99530050-99530094                            | NM_028258:59       | Dzip11        | INSIDE                 | 1.073                                                        | 0.416                          | 1764.06            | 734.12             | 0.447                          | 1316.43            | 587.84             |
| A_68_P26224353 | chr8:123607977-123608021                          | NM_010426:-375     | Foxp1a        | PROMOTER               | 1.073                                                        | 0.216                          | 2104.23            | 455.00             | 0.232                          | 1718.92            | 398.99             |
| A_68_P25953241 | chr8:73183221-73183265                            | NM_023217:338      | Pgpep1        | INSIDE                 | 1.073                                                        | 0.194                          | 2571.47            | 499.76             | 0.209                          | 1670.56            | 348.42             |

| ProbeName      | Target position of probe on CpG island microarray | TargetID                | GeneSymbol    | CpG island Description | Ratio of relative methylation (TiO <sub>2</sub> -NP/Vehicle) | Sham group                     |                    |                    | TiO <sub>2</sub> -H group      |                    |                    |
|----------------|---------------------------------------------------|-------------------------|---------------|------------------------|--------------------------------------------------------------|--------------------------------|--------------------|--------------------|--------------------------------|--------------------|--------------------|
|                |                                                   |                         |               |                        |                                                              | Relative methylation (Cy5/Cy3) | Cy3 signal (Input) | Cy5 signal (MeDIP) | Relative methylation (Cy5/Cy3) | Cy3 signal (Input) | Cy5 signal (MeDIP) |
| A_68_P24951777 | chr7:5003100-5003144                              | NM_026900:-11           | Zfp580        | PROMOTER               | 1.073                                                        | 0.340                          | 1815.57            | 616.55             | 0.364                          | 1204.09            | 438.67             |
| A_68_P24758107 | chr6:113145188-113145232                          | NM_177763:168           | Lhfp14        | INSIDE                 | 1.073                                                        | 0.565                          | 1630.49            | 920.58             | 0.606                          | 1342.77            | 813.26             |
| A_68_P24605097 | chr6:85401585-85401629                            | NM_007638:108           | Cct7          | INSIDE                 | 1.073                                                        | 0.236                          | 2013.98            | 474.62             | 0.253                          | 1587.56            | 401.55             |
| A_68_P21152001 | chr2:38921133-38921177                            | NM_029793:-228          | Golga1        | PROMOTER               | 1.073                                                        | 1.835                          | 568.71             | 1043.35            | 1.969                          | 428.57             | 843.71             |
| A_68_P21114928 | chr2:32218406-32218450                            | NM_028412:-325          | Ciz1          | DIVERGENT_PROMOTER     | 1.073                                                        | 1.734                          | 621.98             | 1078.33            | 1.861                          | 497.46             | 925.67             |
| A_68_P21041406 | chr2:18689012-18689056                            | ENSMUST00000119424:8424 |               | DOWNSTREAM             | 1.073                                                        | 0.338                          | 2352.35            | 794.49             | 0.362                          | 1784.64            | 646.56             |
| A_68_P20897156 | chr1:186555676-186555720                          | NM_008250:674           | Hlx           | INSIDE                 | 1.073                                                        | 0.389                          | 5417.63            | 2107.51            | 0.417                          | 3816.56            | 1592.69            |
| A_68_P31864632 | chr18:80665927-80665971                           | NM_026295:458           | Ctdp1         | INSIDE                 | 1.072                                                        | 0.310                          | 2489.58            | 771.83             | 0.332                          | 1874.41            | 622.71             |
| A_68_P29480508 | chr14:26746521-26746565                           | NM_025311:194           | D14Ertdd449e  | INSIDE                 | 1.072                                                        | 0.081                          | 5802.37            | 470.56             | 0.087                          | 4404.28            | 382.80             |
| A_68_P28940416 | chr13:34839156-34839200                           | NM_138746:7668          | Fam50b        | INSIDE                 | 1.072                                                        | 2.132                          | 897.90             | 1913.92            | 2.285                          | 641.07             | 1465.06            |
| A_68_P28748149 | chr12:113384890-113384934                         | NM_001097621:494        | Kif26a        | INSIDE                 | 1.072                                                        | 0.501                          | 1675.87            | 840.04             | 0.537                          | 1252.05            | 672.82             |
| A_68_P28458301 | chr12:57798039-57798083                           | NM_011041:1435          | Pax9          | INSIDE                 | 1.072                                                        | 0.665                          | 3044.63            | 2025.03            | 0.713                          | 2345.24            | 1672.11            |
| A_68_P28078911 | chr11:102180801-102180845                         | NM_011551:-412          | Ubtfr         | PROMOTER               | 1.072                                                        | 0.395                          | 1662.53            | 656.08             | 0.423                          | 1105.74            | 467.92             |
| A_68_P23637425 | chr5:42155503-42155547                            | NM_007524:-65           | Nkx3-2        | PROMOTER               | 1.072                                                        | 0.221                          | 2391.15            | 528.68             | 0.237                          | 1802.02            | 427.26             |
| A_68_P22372021 | chr3:100726069-100726113                          | NM_001165953:-325       | Trim45        | PROMOTER               | 1.072                                                        | 0.213                          | 3059.91            | 652.15             | 0.229                          | 2205.36            | 504.05             |
| A_68_P21842276 | chr2:168396951-168396995                          | NM_001136073:18719      | Nfatc2        | INSIDE                 | 1.072                                                        | 1.943                          | 531.14             | 1031.78            | 2.082                          | 462.34             | 962.57             |
| A_68_P21749219 | chr2:152240057-152240101                          | NM_175126:702           | Zcchc3        | INSIDE                 | 1.072                                                        | 0.377                          | 1828.88            | 690.07             | 0.405                          | 1566.79            | 633.82             |
| A_68_P32453218 | chrX:68617930-68617974                            | NM_016985:18            | Mtmr1         | INSIDE                 | 1.071                                                        | 2.569                          | 413.63             | 1062.59            | 2.752                          | 475.47             | 1308.70            |
| A_68_P31928725 | chr19:5448265-5448309                             | NM_010235:589           | Fosl1         | INSIDE                 | 1.071                                                        | 0.335                          | 2767.43            | 925.82             | 0.358                          | 1906.92            | 683.17             |
| A_68_P31130477 | chr17:30026875-30026919                           | NM_001081160:-2069      | Mdga1         | PROMOTER               | 1.071                                                        | 2.036                          | 734.45             | 1495.17            | 2.181                          | 591.88             | 1290.85            |
| A_68_P31099059 | chr17:24832929-24832973                           | NM_023040:151           | Gfer          | INSIDE                 | 1.071                                                        | 2.149                          | 492.67             | 1058.72            | 2.302                          | 421.49             | 970.42             |
| A_68_P30596433 | chr16:22162850-22162894                           | NM_183029:500           | Igf2bp2       | INSIDE                 | 1.071                                                        | 1.915                          | 768.77             | 1472.12            | 2.051                          | 680.49             | 1395.85            |
| A_68_P30500795 | chr15:102765355-102765399                         | NM_010463:-1907         | Hoxc12        | PROMOTER               | 1.071                                                        | 0.521                          | 1021.20            | 531.82             | 0.558                          | 949.35             | 529.56             |
| A_68_P30344887 | chr15:75740593-75740637                           | NM_178646:450           | Tigd5         | INSIDE                 | 1.071                                                        | 0.416                          | 3271.53            | 1361.67            | 0.446                          | 2288.42            | 1019.88            |
| A_68_P28397454 | chr12:45430004-45430048                           | NM_001146031:155        | Nrcam         | INSIDE                 | 1.071                                                        | 0.545                          | 2968.99            | 1617.72            | 0.583                          | 2234.11            | 1303.43            |
| A_68_P27927393 | chr11:75465155-75465200                           | NM_001080774:-474       | Myo1c         | PROMOTER               | 1.071                                                        | 0.429                          | 1774.31            | 761.74             | 0.460                          | 1291.36            | 593.64             |
| A_68_P26323063 | chr9:15297918-15297962                            | AK146267:65             |               | INSIDE                 | 1.071                                                        | 2.773                          | 395.23             | 1096.12            | 2.970                          | 350.16             | 1040.02            |
| A_68_P25581871 | chr7:147222691-147222735                          | NM_027201:423           | Zfp511        | INSIDE                 | 1.071                                                        | 0.535                          | 1687.50            | 902.14             | 0.572                          | 1244.43            | 712.28             |
| A_68_P24117827 | chr5:136254305-136254349                          | NM_029659:-71           | Styxl1        | DIVERGENT_PROMOTER     | 1.071                                                        | 0.325                          | 1899.44            | 616.39             | 0.348                          | 1424.78            | 495.24             |
| A_68_P23972005 | chr5:108877904-108877948                          | NM_172883:-16           | Mfsd7a        | PROMOTER               | 1.071                                                        | 0.462                          | 1285.88            | 593.76             | 0.495                          | 932.23             | 461.10             |
| A_68_P21838231 | chr2:167720809-167720853                          |                         |               | Unknown                | 1.071                                                        | 0.449                          | 1294.42            | 580.62             | 0.481                          | 1026.85            | 493.42             |
| A_68_P20351170 | chr1:74947336-74947380                            | NR_029876:-63           | Mir375        | PROMOTER               | 1.071                                                        | 0.299                          | 2808.98            | 839.55             | 0.320                          | 2090.58            | 669.43             |
| A_68_P30350209 | chr15:76552567-76552611                           | NM_198119:15            | Lrrc24        | INSIDE                 | 1.070                                                        | 0.467                          | 1227.73            | 573.48             | 0.500                          | 1008.82            | 504.42             |
| A_68_P28752688 | chr12:114047423-114047467                         | NM_145450:259           | BC022687      | INSIDE                 | 1.070                                                        | 1.698                          | 1136.31            | 1929.39            | 1.817                          | 885.04             | 1607.75            |
| A_68_P26531723 | chr9:55359728-55359772                            | NM_145615:300           | Etf1          | INSIDE                 | 1.070                                                        | 0.581                          | 1894.70            | 1101.07            | 0.622                          | 1488.10            | 925.22             |
| A_68_P25591882 | chr7:149136496-149136540                          | NM_001009929:528        | Brsk2         | INSIDE                 | 1.070                                                        | 1.503                          | 1027.52            | 1544.08            | 1.607                          | 877.12             | 1409.82            |
| A_68_P24287933 | chr6:21802094-21802138                            | NM_173007:399           | Tspan12       | INSIDE                 | 1.070                                                        | 0.420                          | 2125.80            | 892.24             | 0.449                          | 1666.00            | 748.24             |
| A_68_P23308596 | chr4:131394388-131394432                          | NM_001083119:-217       | Ptpnru        | DIVERGENT_PROMOTER     | 1.070                                                        | 0.451                          | 1258.87            | 568.13             | 0.483                          | 919.44             | 443.79             |
| A_68_P22309971 | chr3:87587854-87587898                            | NM_001033124:11208      | Ntrk1         | INSIDE                 | 1.070                                                        | 1.712                          | 1023.57            | 1752.08            | 1.831                          | 831.83             | 1523.43            |
| A_68_P21825959 | chr2:165622131-165622175                          | NM_027230:88036         | Zmynd8        | INSIDE                 | 1.070                                                        | 1.734                          | 12399.91           | 21498.46           | 1.854                          | 9200.08            | 17059.98           |
| A_68_P21739505 | chr2:150326509-150326553                          | ENSMUST00000121441:51   |               | INSIDE                 | 1.070                                                        | 1.923                          | 957.77             | 1841.53            | 2.057                          | 818.70             | 1684.24            |
| A_68_P21600379 | chr2:124949302-124949346                          | NM_001162417:72         | Myef2         | INSIDE                 | 1.070                                                        | 4.435                          | 719.36             | 3190.18            | 4.746                          | 617.51             | 2930.60            |
| A_68_P31257382 | chr17:56766395-56766439                           | NM_028782:-90           | Lomp1         | DIVERGENT_PROMOTER     | 1.069                                                        | 2.314                          | 5126.00            | 11862.87           | 2.475                          | 3231.24            | 7996.14            |
| A_68_P30506931 | chr16:3872466-3872510                             | NM_001033159:-114       | Zfp597        | PROMOTER               | 1.069                                                        | 0.180                          | 3042.93            | 549.08             | 0.193                          | 1961.33            | 378.16             |
| A_68_P30475231 | chr15:98397707-98397751                           | NR_028442:-26           | 9330020H09Rik | PROMOTER               | 1.069                                                        | 0.200                          | 2365.41            | 472.71             | 0.214                          | 1844.10            | 393.91             |
| A_68_P29023542 | chr13:49242589-49242633                           | NM_029361:773           | Wnk2          | INSIDE                 | 1.069                                                        | 2.196                          | 1197.26            | 2628.77            | 2.348                          | 958.48             | 2250.54            |
| A_68_P28160473 | chr11:116485490-116485534                         | NM_001167680:54         | Rhbd12        | INSIDE                 | 1.069                                                        | 0.440                          | 1560.35            | 687.00             | 0.471                          | 1192.93            | 561.51             |
| A_68_P28098603 | chr11:105805256-105805300                         | NM_007805:183           | Cyb561        | INSIDE                 | 1.069                                                        | 3.212                          | 1622.65            | 5212.33            | 3.433                          | 1191.05            | 4088.79            |
| A_68_P26079046 | chr8:97219612-97219656                            | NM_026385:508           | Pilp          | INSIDE                 | 1.069                                                        | 3.789                          | 748.88             | 2837.53            | 4.052                          | 654.20             | 2650.54            |
| A_68_P25656683 | chr8:11634954-11634998                            | NR_030781:60            | Ankrd10       | INSIDE                 | 1.069                                                        | 0.598                          | 3035.54            | 1816.51            | 0.640                          | 2257.50            | 1443.79            |
| A_68_P25614134 | chr8:3476114-3476158                              | NM_029598:5275          | 1700019B03Rik | INSIDE                 | 1.069                                                        | 0.402                          | 1403.58            | 564.04             | 0.430                          | 935.08             | 401.68             |
| A_68_P24933418 | chr6:147212829-147212873                          | NM_008970:-243          | Pthlh         | PROMOTER               | 1.069                                                        | 0.475                          | 1121.42            | 532.97             | 0.508                          | 937.16             | 476.24             |
| A_68_P24773308 | chr6:115803699-115803744                          | NM_001167763:176        | Ifi122        | INSIDE                 | 1.069                                                        | 0.672                          | 4267.34            | 2867.05            | 0.718                          | 3092.07            | 2219.80            |
| A_68_P24098213 | chr5:131915558-131915602                          | NM_177047:1102633       | Aut5          | INSIDE                 | 1.069                                                        | 1.567                          | 2275.33            | 3566.11            | 1.675                          | 1616.87            | 2708.49            |
| A_68_P22422565 | chr3:109945185-109945229                          | NM_001163348:1184       | Ntng1         | INSIDE                 | 1.069                                                        | 2.497                          | 2153.83            | 5377.78            | 2.668                          | 1718.16            | 4584.72            |
| A_68_P21812072 | chr2:163201808-163201852                          | NM_021566:21879         | Jph2          | INSIDE                 | 1.069                                                        | 2.141                          | 927.66             | 1985.99            | 2.290                          | 787.69             | 1803.52            |
| A_68_P31106680 | chr17:25981271-25981315                           | NM_145999:504           | Rhot2         | INSIDE                 | 1.068                                                        | 0.547                          | 3939.58            | 2155.56            | 0.584                          | 2670.68            | 1560.82            |
| A_68_P30591825 | chr16:21333336-21333380                           | AK018285:71             |               | INSIDE                 | 1.068                                                        | 2.526                          | 2125.19            | 5369.29            | 2.698                          | 1641.95            | 4429.77            |
| A_68_P30387340 | chr15:83081767-83081811                           | NM_001170954:373        | A4galt        | INSIDE                 | 1.068                                                        | 0.486                          | 1825.79            | 886.74             | 0.519                          | 1440.89            | 747.34             |
| A_68_P28194146 | chr12:3235815-3235859                             | NR_015551:46            | 1700012B15Rik | INSIDE                 | 1.068                                                        | 0.521                          | 1462.27            | 761.95             | 0.556                          | 1151.43            | 640.50             |
| A_68_P28182345 | chr11:119959914-119959958                         | NM_183137:109           | 2410002101Rik | INSIDE                 | 1.068                                                        | 2.161                          | 1017.18            | 2198.02            | 2.307                          | 775.64             | 1789.48            |
| A_68_P28103510 | chr11:106648827-106648871                         | NR_037224:-4775         | Mir3064       | PROMOTER               | 1.068                                                        | 0.266                          | 3869.77            | 1030.95            | 0.285                          | 2701.50            | 768.89             |
| A_68_P25995584 | chr8:82163380-82163424                            | NM_001081164:-172       | Otd4          | PROMOTER               | 1.068                                                        | 0.478                          | 1855.16            | 886.92             | 0.511                          | 1425.74            | 728.09             |
| A_68_P25499769 | chr7:133436111-133436155                          | NM_145587:20000         | Sbk1          | INSIDE                 | 1.068                                                        | 2.915                          | 804.46             | 2345.25            | 3.113                          | 637.94             | 1985.61            |
| A_68_P24130914 | chr5:139060935-139060979                          | NM_001044747:15         | Zfp68         | INSIDE                 | 1.068                                                        | 0.364                          | 2172.73            | 791.53             | 0.389                          | 1663.22            | 647.13             |

| ProbeName      | Target position of probe on CpG island microarray | TargetID                | GeneSymbol | CpG island Description | Ratio of relative methylation (TiO <sub>2</sub> -NP/Vehicle) | Sham group                     |                    |                    | TiO <sub>2</sub> -H group      |                    |                    |
|----------------|---------------------------------------------------|-------------------------|------------|------------------------|--------------------------------------------------------------|--------------------------------|--------------------|--------------------|--------------------------------|--------------------|--------------------|
|                |                                                   |                         |            |                        |                                                              | Relative methylation (Cy5/Cy3) | Cy3 signal (Input) | Cy5 signal (MeDIP) | Relative methylation (Cy5/Cy3) | Cy3 signal (Input) | Cy5 signal (MeDIP) |
| A_68_P23592016 | chr5:34338666-34338710                            | NM_001001985:56         | Nat8l      | INSIDE                 | 1.068                                                        | 0.426                          | 2902.18            | 1235.28            | 0.454                          | 2101.05            | 954.75             |
| A_68_P23451690 | chr5:4757789-4757833                              | NM_021457:406           | Fzd1       | INSIDE                 | 1.068                                                        | 0.559                          | 1534.67            | 858.37             | 0.597                          | 1332.37            | 795.71             |
| A_68_P23342099 | chr4:137351703-137351747                          | NM_007431:568           | Alpl       | INSIDE                 | 1.068                                                        | 0.358                          | 2837.14            | 1014.86            | 0.382                          | 2090.37            | 798.26             |
| A_68_P22728295 | chr4:11083786-11083830                            | NM_001199105:221        | Trp53inp1  | INSIDE                 | 1.068                                                        | 0.370                          | 2052.68            | 758.67             | 0.395                          | 1570.76            | 620.20             |
| A_68_P21840413 | chr2:168094194-168094238                          | NM_001081134:615        | Kcng1      | INSIDE                 | 1.068                                                        | 1.753                          | 1343.77            | 2355.15            | 1.872                          | 984.12             | 1842.06            |
| A_68_P20937462 | chr1:193150005-193150049                          | NM_025864:183           | Tmem206    | INSIDE                 | 1.068                                                        | 0.278                          | 3000.63            | 835.21             | 0.297                          | 2205.31            | 655.86             |
| A_68_P20433237 | chr1:91865288-91865332                            | NM_139152:45842         | Asb18      | INSIDE                 | 1.068                                                        | 0.427                          | 1149.68            | 490.47             | 0.455                          | 973.36             | 443.31             |
| A_68_P32694936 | chrX:136145461-136145505                          | NM_023270:324           | Rnfl28     | INSIDE                 | 1.067                                                        | 2.112                          | 284.98             | 602.01             | 2.255                          | 416.55             | 939.32             |
| A_68_P31490815 | chr18:10609631-10609677                           | NM_001081222:696        | Esco1      | INSIDE                 | 1.067                                                        | 1.953                          | 1047.68            | 2045.85            | 2.084                          | 785.37             | 1636.75            |
| A_68_P30631086 | chr16:28564499-28564543                           | NM_010199:188768        | Fgf12      | INSIDE                 | 1.067                                                        | 2.797                          | 978.17             | 2735.90            | 2.984                          | 748.26             | 2232.65            |
| A_68_P29285955 | chr13:104383068-104383112                         | BC099526:114623         |            | INSIDE                 | 1.067                                                        | 1.906                          | 686.18             | 1308.16            | 2.035                          | 555.81             | 1130.98            |
| A_68_P28068129 | chr11:100302265-100302309                         | NM_026561:117           | Nt5c3l     | INSIDE                 | 1.067                                                        | 0.450                          | 1729.01            | 778.42             | 0.480                          | 1274.73            | 612.46             |
| A_68_P28054175 | chr11:97914595-97914639                           | NM_146028:160           | Stac2      | INSIDE                 | 1.067                                                        | 0.286                          | 3816.45            | 1093.04            | 0.306                          | 2746.75            | 839.77             |
| A_68_P28046787 | chr11:96650859-96650903                           | NM_007622:431           | Cbx1       | INSIDE                 | 1.067                                                        | 0.210                          | 2512.74            | 526.81             | 0.224                          | 1862.92            | 416.61             |
| A_68_P27303375 | chr10:84039721-84039765                           | NM_146008:51            | Tcp11l2    | INSIDE                 | 1.067                                                        | 1.814                          | 732.89             | 1329.10            | 1.936                          | 762.94             | 1399.67            |
| A_68_P24994095 | chr7:20158628-20158672                            | NM_027189:42            | Gemin7     | INSIDE                 | 1.067                                                        | 0.411                          | 3139.57            | 1290.52            | 0.439                          | 2235.76            | 980.67             |
| A_68_P24951591 | chr7:4969560-4969604                              | NM_025324:2473          | Zfp524     | INSIDE                 | 1.067                                                        | 2.043                          | 1612.76            | 3294.57            | 2.180                          | 1293.37            | 2819.09            |
| A_68_P24819885 | chr6:125264177-125264221                          | NM_010736:310           | Libr       | DIVERGENT_PROMOTER     | 1.067                                                        | 0.457                          | 1261.86            | 576.20             | 0.487                          | 908.08             | 442.41             |
| A_68_P24448666 | chr6:52108435-52108479                            | NM_010449:140           | Hoxa1      | PROMOTER               | 1.067                                                        | 0.477                          | 1637.69            | 781.71             | 0.509                          | 1346.21            | 685.46             |
| A_68_P24130230 | chr5:138882841-138882885                          | NM_028130:159           | Zfp157     | INSIDE                 | 1.067                                                        | 0.341                          | 2039.04            | 695.01             | 0.364                          | 1534.02            | 558.08             |
| A_68_P23229785 | chr4:116230013-116230057                          | NM_029868:297           | Gphpl11    | DIVERGENT_PROMOTER     | 1.067                                                        | 0.500                          | 1550.31            | 775.15             | 0.534                          | 1139.49            | 608.09             |
| A_68_P31149281 | chr17:33661172-33661216                           | NM_172619:54            | Adams10    | INSIDE                 | 1.066                                                        | 0.603                          | 1544.75            | 931.46             | 0.643                          | 1259.66            | 809.61             |
| A_68_P29448404 | chr14:21514121-21514165                           | NM_028428:47            | Fut11      | PROMOTER               | 1.066                                                        | 0.394                          | 1796.01            | 707.15             | 0.420                          | 1257.57            | 527.76             |
| A_68_P28083251 | chr11:102941489-102941533                         | NM_152813:21462         | Plcd3      | INSIDE                 | 1.066                                                        | 0.551                          | 2319.36            | 1278.57            | 0.588                          | 1765.03            | 1037.68            |
| A_68_P27483042 | chr10:117229727-117229771                         | NM_134010:13            | Nup107     | INSIDE                 | 1.066                                                        | 1.601                          | 917.58             | 1469.06            | 1.707                          | 696.19             | 1188.24            |
| A_68_P26016161 | chr8:86239606-86239651                            | NM_197982:553           | Ddx39      | INSIDE                 | 1.066                                                        | 0.513                          | 1392.80            | 714.27             | 0.547                          | 1161.27            | 634.85             |
| A_68_P24799554 | chr6:120615829-120615873                          | NM_001128151:588        | Ccer2      | PROMOTER               | 1.066                                                        | 0.140                          | 3754.85            | 526.78             | 0.150                          | 2756.21            | 412.30             |
| A_68_P21707841 | chr2:144382255-144382299                          | NM_019787:264           | Sec23b     | INSIDE                 | 1.066                                                        | 2.829                          | 1172.27            | 3316.41            | 3.016                          | 930.44             | 2806.03            |
| A_68_P20877854 | chr1:182724487-182724531                          | NM_008210:19226         | H3f3a      | DOWNSTREAM             | 1.066                                                        | 0.156                          | 8514.08            | 1324.18            | 0.166                          | 5787.34            | 959.60             |
| A_68_P31712049 | chr18:53405446-53405490                           | NM_029394:153           | Smx24      | INSIDE                 | 1.065                                                        | 0.475                          | 1168.60            | 554.96             | 0.506                          | 889.56             | 449.85             |
| A_68_P31175203 | chr17:39980581-39980625                           | ENSMUST00000102050:478  |            | PROMOTER               | 1.065                                                        | 0.261                          | 4433.17            | 1158.75            | 0.278                          | 3720.09            | 1035.28            |
| A_68_P31106586 | chr17:25970234-25970278                           | NM_019719:50            | Stub1      | INSIDE                 | 1.065                                                        | 0.344                          | 1697.84            | 584.28             | 0.367                          | 1228.68            | 450.34             |
| A_68_P30991209 | chr16:96348941-96348985                           | NM_008251:370           | Hmg1       | INSIDE                 | 1.065                                                        | 0.487                          | 2665.21            | 1297.21            | 0.518                          | 1914.62            | 992.71             |
| A_68_P29941732 | chr14:119324506-119324550                         | NM_025943:2139          | Dzip1      | PROMOTER               | 1.065                                                        | 0.265                          | 1760.32            | 467.30             | 0.283                          | 1434.00            | 405.27             |
| A_68_P29725076 | chr14:75347080-75347124                           | NM_001033439:582        | Lrch1      | INSIDE                 | 1.065                                                        | 4.701                          | 973.85             | 4578.53            | 5.009                          | 825.10             | 4133.23            |
| A_68_P28066379 | chr11:100006994-100007038                         | NM_008471:217           | Krt19      | INSIDE                 | 1.065                                                        | 0.582                          | 1994.44            | 1161.22            | 0.620                          | 1491.95            | 925.39             |
| A_68_P27542071 | chr10:128002533-128002577                         | NM_011119:436           | Pa2g4      | INSIDE                 | 1.065                                                        | 0.139                          | 5604.04            | 781.56             | 0.149                          | 4028.08            | 598.29             |
| A_68_P27287759 | chr10:80616606-80616650                           | NM_021501:13837         | Pias4      | DOWNSTREAM             | 1.065                                                        | 3.536                          | 851.31             | 3010.09            | 3.766                          | 730.72             | 2751.76            |
| A_68_P26643861 | chr9:75257109-75257153                            | NM_027418:36            | Mapk6      | INSIDE                 | 1.065                                                        | 6.778                          | 181.04             | 5903.73            | 7.217                          | 779.25             | 5623.58            |
| A_68_P24125091 | chr5:137748534-137748578                          | NM_001109909:346        | Srrt       | INSIDE                 | 1.065                                                        | 0.144                          | 3357.87            | 485.01             | 0.154                          | 2380.23            | 366.19             |
| A_68_P24118278 | chr5:136344278-136344322                          | NM_021403:50325         | Srrm3      | INSIDE                 | 1.065                                                        | 2.384                          | 642.15             | 1531.17            | 2.538                          | 584.58             | 1483.88            |
| A_68_P24066887 | chr5:125914212-125914256                          | NM_203319:184           | Dhx37      | INSIDE                 | 1.065                                                        | 0.386                          | 2315.32            | 892.99             | 0.411                          | 1890.76            | 776.35             |
| A_68_P31793418 | chr18:67883645-67883689                           | NM_001127177:609        | Ptpn2      | INSIDE                 | 1.064                                                        | 0.405                          | 3110.58            | 1259.24            | 0.431                          | 2494.25            | 1074.55            |
| A_68_P31152223 | chr17:34257573-34257617                           | NR_037970:749           | Brd2       | PROMOTER               | 1.064                                                        | 0.416                          | 1984.19            | 824.44             | 0.442                          | 1480.77            | 654.76             |
| A_68_P31118766 | chr17:27976996-27977040                           | NM_011432:13            | Snrpc      | PROMOTER               | 1.064                                                        | 0.199                          | 2675.68            | 532.40             | 0.212                          | 2005.67            | 424.52             |
| A_68_P30000055 | chr15:8395316-8395364                             | NM_027707:877           | Nipbl      | PROMOTER               | 1.064                                                        | 12.591                         | 6665.76            | 83929.01           | 13.399                         | 6273.59            | 84062.63           |
| A_68_P27630331 | chr11:20101120-20101164                           | NM_008996:462           | Rab1       | PROMOTER               | 1.064                                                        | 0.452                          | 1283.69            | 580.12             | 0.481                          | 1048.30            | 503.91             |
| A_68_P25268784 | chr7:87948360-87948404                            | NM_016721:165           | Iqgap1     | PROMOTER               | 1.064                                                        | 0.430                          | 1608.55            | 691.25             | 0.457                          | 1331.22            | 608.78             |
| A_68_P24318694 | chr6:28085042-28085086                            | NM_008174:695           | Gm8        | PROMOTER               | 1.064                                                        | 1.448                          | 1929.74            | 2794.67            | 1.541                          | 1398.37            | 2155.40            |
| A_68_P24135896 | chr5:139960379-139960423                          | NM_001159908:45         | Zfand2a    | INSIDE                 | 1.064                                                        | 0.430                          | 2431.94            | 1044.55            | 0.457                          | 1787.05            | 816.42             |
| A_68_P21629723 | chr2:130249901-130249945                          | NM_178762:102           | Fam113a    | INSIDE                 | 1.064                                                        | 0.438                          | 1877.07            | 822.51             | 0.466                          | 1465.58            | 683.50             |
| A_68_P21571598 | chr2:119625749-119625793                          | NM_019392:521           | Tyro3      | INSIDE                 | 1.064                                                        | 0.329                          | 4737.05            | 1559.92            | 0.350                          | 2971.58            | 1041.19            |
| A_68_P30413820 | chr15:87375020-87375064                           | ENSMUST00000169110:139  |            | INSIDE                 | 1.063                                                        | 2.085                          | 869.86             | 1813.24            | 2.215                          | 706.51             | 1564.81            |
| A_68_P29410629 | chr14:13173646-13173690                           | NM_080433:4711          | Fezf2      | DOWNSTREAM             | 1.063                                                        | 0.398                          | 1250.13            | 497.89             | 0.423                          | 1174.67            | 497.28             |
| A_68_P29034740 | chr13:51941294-51941338                           | NM_011817:727           | Gadd45g    | PROMOTER               | 1.063                                                        | 0.396                          | 1625.64            | 644.53             | 0.421                          | 1102.68            | 464.62             |
| A_68_P28175793 | chr11:118951344-118951390                         | NM_007625:3815          | Cbx4       | PROMOTER               | 1.063                                                        | 0.572                          | 4043.12            | 2310.91            | 0.608                          | 2558.23            | 1554.29            |
| A_68_P27558729 | chr11:4537823-4537867                             | NM_029921:49            | Ascc2      | INSIDE                 | 1.063                                                        | 0.501                          | 1327.47            | 665.71             | 0.533                          | 1154.04            | 615.04             |
| A_68_P25271554 | chr7:88489875-88489919                            | NM_009092:224           | Rps17      | INSIDE                 | 1.063                                                        | 1.517                          | 994.81             | 1508.81            | 1.612                          | 732.89             | 1181.07            |
| A_68_P24656006 | chr6:94233732-94233776                            | NM_001029850:144        | Mag1       | INSIDE                 | 1.063                                                        | 1.654                          | 1095.27            | 1811.45            | 1.658                          | 1005.68            | 1767.91            |
| A_68_P24053678 | chr5:123508053-123508097                          | ENSMUST00000119611:8176 |            | PROMOTER               | 1.063                                                        | 0.167                          | 3271.06            | 546.48             | 0.178                          | 2120.38            | 376.41             |
| A_68_P23417689 | chr4:151654150-151654194                          | NM_178406:5702          | Gpr153     | INSIDE                 | 1.063                                                        | 2.013                          | 571.40             | 1150.38            | 2.140                          | 401.64             | 859.65             |
| A_68_P31626772 | chr18:37181762-37181806                           | NM_138663:1901          | Pcdha12    | INSIDE                 | 1.062                                                        | 2.195                          | 2202.86            | 4834.38            | 2.330                          | 1647.15            | 3837.23            |
| A_68_P31472610 | chr18:6240800-6240844                             | NM_008448:700           | Kif5b      | INSIDE                 | 1.062                                                        | 0.362                          | 2039.64            | 738.43             | 0.384                          | 1566.28            | 601.97             |
| A_68_P30988899 | chr16:95923500-95923544                           | NM_011809:491           | Ets2       | PROMOTER               | 1.062                                                        | 1.785                          | 883.88             | 1577.42            | 1.894                          | 732.35             | 1387.44            |
| A_68_P30380066 | chr15:81688707-81688754                           | NM_020507:26            | Tob2       | INSIDE                 | 1.062                                                        | 0.246                          | 2154.97            | 529.81             | 0.261                          | 1383.55            | 361.39             |

| ProbeName      | Target position of probe on CpG island microarray | TargetID               | GeneSymbol    | CpG island Description | Ratio of relative methylation (TiO <sub>2</sub> -NP/Vehicle) | Sham group                     |                    |                    | TiO <sub>2</sub> -H group      |                    |                    |
|----------------|---------------------------------------------------|------------------------|---------------|------------------------|--------------------------------------------------------------|--------------------------------|--------------------|--------------------|--------------------------------|--------------------|--------------------|
|                |                                                   |                        |               |                        |                                                              | Relative methylation (Cy5/Cy3) | Cy3 signal (Input) | Cy5 signal (MeDIP) | Relative methylation (Cy5/Cy3) | Cy3 signal (Input) | Cy5 signal (MeDIP) |
| A_68_P28044023 | chr11:96214672-96214716                           | NM_134032:1749         | Hoxb2         | INSIDE                 | 1.062                                                        | 2.100                          | 1159.37            | 2435.22            | 2.231                          | 905.56             | 2020.41            |
| A_68_P26809635 | chr9:107473258-107473302                          | NM_010489:1787         | Hyal2         | INSIDE                 | 1.062                                                        | 2.610                          | 923.19             | 2409.92            | 2.772                          | 717.80             | 1990.04            |
| A_68_P26667549 | chr9:79914528-79914572                            | NM_146003:159          | Senp6         | PROMOTER               | 1.062                                                        | 2.147                          | 402.18             | 863.39             | 2.280                          | 341.22             | 778.05             |
| A_68_P26138085 | chr8:108687070-108687114                          | NM_133792:12794        | Pla2g15       | INSIDE                 | 1.062                                                        | 1.713                          | 1731.77            | 2967.17            | 1.819                          | 1289.44            | 2345.39            |
| A_68_P23912413 | chr5:97821466-97821510                            | NM_001033191:-139      | Naa11         | PROMOTER               | 1.062                                                        | 2.851                          | 581.06             | 1656.82            | 3.027                          | 427.64             | 1294.35            |
| A_68_P21749118 | chr2:152222671-152222715                          | NM_011438:1090         | Sox12         | INSIDE                 | 1.062                                                        | 0.539                          | 2677.10            | 1442.53            | 0.572                          | 2010.05            | 1149.91            |
| A_68_P21485378 | chr2:103601161-103601205                          | NM_153126:225          | Nat10         | INSIDE                 | 1.062                                                        | 0.263                          | 3207.72            | 842.93             | 0.279                          | 2171.14            | 605.86             |
| A_68_P21076474 | chr2:25977754-25977798                            | NM_026495:555          | Nacc2         | INSIDE                 | 1.062                                                        | 0.344                          | 1332.28            | 458.82             | 0.366                          | 1097.09            | 401.36             |
| A_68_P20240341 | chr1:55144942-55144986                            | NM_008303:27           | Hspe1         | DIVERGENT_PROMOTER     | 1.062                                                        | 0.492                          | 1921.35            | 945.66             | 0.523                          | 1551.98            | 810.94             |
| A_68_P31038473 | chr17:10512600-10512644                           | NR_037588:-161         | B930003M22Rik | DIVERGENT_PROMOTER     | 1.061                                                        | 2.022                          | 602.85             | 1219.06            | 2.146                          | 438.02             | 939.89             |
| A_68_P30421087 | chr15:88581789-88581833                           | NM_181412:-330         | Zbed4         | PROMOTER               | 1.061                                                        | 1.707                          | 661.39             | 1128.85            | 1.811                          | 554.28             | 1004.07            |
| A_68_P28170155 | chr11:118108984-118109028                         | NM_001112699-900       | Cyth1         | INSIDE                 | 1.061                                                        | 0.452                          | 1620.94            | 733.32             | 0.480                          | 1071.26            | 514.40             |
| A_68_P27286997 | chr10:80493927-80493971                           | NM_134135:2709         | Slc39a3       | INSIDE                 | 1.061                                                        | 2.021                          | 1871.16            | 3782.14            | 2.145                          | 1562.61            | 3351.37            |
| A_68_P25949911 | chr8:72636783-72636827                            | NM_007789:7939         | Ncan          | INSIDE                 | 1.061                                                        | 0.300                          | 2211.93            | 664.25             | 0.318                          | 1758.44            | 560.04             |
| A_68_P25011515 | chr7:26503925-26503969                            | NM_028771:126          | Ccdc97        | INSIDE                 | 1.061                                                        | 0.232                          | 2103.27            | 488.56             | 0.246                          | 1644.41            | 405.09             |
| A_68_P22518620 | chr3:128902934-128902978                          | NM_001042504:115       | Pitx2         | INSIDE                 | 1.061                                                        | 0.434                          | 2583.17            | 1120.84            | 0.461                          | 2096.50            | 965.48             |
| A_68_P32668456 | chrX:130221722-130221766                          | NM_001105245:1788      | Pcdh19        | INSIDE                 | 1.060                                                        | 1.861                          | 739.29             | 1376.04            | 1.973                          | 864.36             | 1705.03            |
| A_68_P32321831 | chrX:34667243-34667287                            | NM_025937:507          | Nkap          | INSIDE                 | 1.060                                                        | 1.802                          | 393.15             | 708.61             | 1.910                          | 600.13             | 1146.20            |
| A_68_P31932622 | chr19:6085142-6085186                             | NM_026410:68           | Cdea5         | INSIDE                 | 1.060                                                        | 0.321                          | 2536.18            | 813.51             | 0.340                          | 1982.31            | 674.10             |
| A_68_P31630976 | chr18:38095246-38095290                           | NM_007858:-203         | Diap1         | PROMOTER               | 1.060                                                        | 0.436                          | 1045.36            | 455.57             | 0.462                          | 881.79             | 407.35             |
| A_68_P30544730 | chr16:10835415-10835459                           | NM_001162932:285       | A630055G03Rik | INSIDE                 | 1.060                                                        | 1.905                          | 424.68             | 808.90             | 2.019                          | 458.54             | 925.71             |
| A_68_P27838142 | chr11:59475681-59475726                           | NM_012027:-293         | Mrip          | PROMOTER               | 1.060                                                        | 0.307                          | 2862.37            | 879.14             | 0.325                          | 2291.92            | 745.85             |
| A_68_P27564592 | chr11:5607482-5607526                             | NM_026080:198          | Mrps24        | INSIDE                 | 1.060                                                        | 4.475                          | 794.23             | 3554.35            | 4.745                          | 632.25             | 3000.08            |
| A_68_P27289009 | chr10:80806292-80806336                           | NM_148951:-303         | Gipc3         | PROMOTER               | 1.060                                                        | 0.542                          | 1960.43            | 1061.72            | 0.574                          | 1542.95            | 886.10             |
| A_68_P27184376 | chr10:61596437-61596481                           | NM_009719:621          | Neurog3       | INSIDE                 | 1.060                                                        | 0.132                          | 3948.45            | 519.62             | 0.140                          | 2583.09            | 360.38             |
| A_68_P25954898 | chr8:73438225-73438269                            | NM_173013:8374         | Mtap1s        | INSIDE                 | 1.060                                                        | 1.743                          | 786.50             | 1370.98            | 1.848                          | 654.65             | 1209.78            |
| A_68_P25087377 | chr7:51684556-51684600                            | ENSMUST00000127790:191 |               | INSIDE                 | 1.060                                                        | 0.446                          | 2399.69            | 1071.41            | 0.473                          | 1695.67            | 802.84             |
| A_68_P24159039 | chr5:144775595-144775639                          | NM_177682:106          | Cez1          | INSIDE                 | 1.060                                                        | 0.297                          | 2268.79            | 673.16             | 0.315                          | 1516.50            | 477.01             |
| A_68_P23961351 | chr5:106886587-106886631                          | NM_001005477:577       | Barhl2        | INSIDE                 | 1.060                                                        | 4.270                          | 5755.15            | 24573.08           | 4.527                          | 4066.46            | 18409.85           |
| A_68_P23777454 | chr5:69732466-69732510                            | NM_175519:460          | Kctd8         | INSIDE                 | 1.060                                                        | 0.377                          | 1307.82            | 492.56             | 0.399                          | 1094.66            | 436.86             |
| A_68_P23392782 | chr4:147538404-147538448                          | NM_176848:3650         | Fbxo2         | INSIDE                 | 1.060                                                        | 1.726                          | 1048.70            | 1809.63            | 1.829                          | 883.37             | 1615.39            |
| A_68_P21393859 | chr2:84499121-84499165                            | NM_001145100:-93       | Gm13718       | DIVERGENT_PROMOTER     | 1.060                                                        | 2.134                          | 1525.97            | 3256.91            | 2.262                          | 1303.41            | 2948.43            |
| A_68_P20739566 | chr1:157584400-157584444                          | NM_010712:4735         | Lhx4          | INSIDE                 | 1.060                                                        | 0.298                          | 2382.02            | 710.69             | 0.316                          | 1633.94            | 516.93             |
| A_68_P20456743 | chr1:95532366-95532410                            | NM_021537:-84          | Stk25         | PROMOTER               | 1.060                                                        | 0.385                          | 1552.76            | 597.09             | 0.407                          | 1213.78            | 494.54             |
| A_68_P20262086 | chr1:59177080-59177125                            | NM_001033449:-162      | Als2cr4       | PROMOTER               | 1.060                                                        | 0.409                          | 2781.43            | 1137.68            | 0.433                          | 2172.02            | 941.55             |
| A_68_P32455383 | chrX:69062125-69062169                            | NM_001081356:29        | Vma21         | INSIDE                 | 1.059                                                        | 1.569                          | 679.19             | 1065.49            | 1.662                          | 925.66             | 1538.35            |
| A_68_P32290254 | chrX:20425761-20425805                            | NM_001159645:114       | Araf          | INSIDE                 | 1.059                                                        | 1.727                          | 1516.09            | 2618.63            | 1.829                          | 2075.38            | 3796.62            |
| A_68_P31442546 | chr17:91487752-91487796                           | NM_020252:4368         | Nrxn1         | INSIDE                 | 1.059                                                        | 4.552                          | 853.30             | 3884.42            | 4.821                          | 711.30             | 3429.18            |
| A_68_P31120337 | chr17:28217277-28217321                           | NM_013687:231          | Tcp11         | INSIDE                 | 1.059                                                        | 0.370                          | 4305.03            | 1593.64            | 0.392                          | 3097.79            | 1214.07            |
| A_68_P29338045 | chr13:113778996-113779044                         | NM_001081062:1011      | Ccno          | INSIDE                 | 1.059                                                        | 3.420                          | 811.14             | 2774.32            | 3.624                          | 661.99             | 2398.79            |
| A_68_P28156898 | chr11:115885554-115885598                         | NM_008211:242          | H3f3b         | INSIDE                 | 1.059                                                        | 0.568                          | 1945.35            | 1104.82            | 0.602                          | 1440.44            | 866.68             |
| A_68_P27897169 | chr11:69615077-69615121                           | NM_010198:29           | Fgf11         | INSIDE                 | 1.059                                                        | 0.484                          | 2157.60            | 1043.77            | 0.512                          | 1586.74            | 812.97             |
| A_68_P25948475 | chr8:72405501-72405545                            | NM_026818:5769         | Cilp2         | INSIDE                 | 1.059                                                        | 2.662                          | 528.47             | 1406.92            | 2.820                          | 396.79             | 1118.85            |
| A_68_P24648071 | chr6:92893655-92893699                            | NR_015530:3101         | 9530026P05Rik | INSIDE                 | 1.059                                                        | 2.055                          | 553.73             | 1137.81            | 2.176                          | 551.84             | 1200.54            |
| A_68_P24155679 | chr5:144014938-144014982                          | NM_017467:16741        | Zfp316        | INSIDE                 | 1.059                                                        | 1.649                          | 752.48             | 1241.20            | 1.747                          | 670.08             | 1170.92            |
| A_68_P24132971 | chr5:139470887-139470931                          | NM_008808:-1           | Pdgfra        | PROMOTER               | 1.059                                                        | 10.792                         | 11443.00           | 123490.80          | 11.432                         | 10853.40           | 124075.50          |
| A_68_P23984845 | chr5:111706231-111706275                          | NM_024477:397431       | Ttc28         | INSIDE                 | 1.059                                                        | 2.718                          | 892.14             | 2424.95            | 2.878                          | 695.79             | 2002.54            |
| A_68_P23865427 | chr5:87233816-87233860                            | NM_177680:324          | Ythdc1        | INSIDE                 | 1.059                                                        | 1.732                          | 523.27             | 906.34             | 1.834                          | 482.21             | 884.43             |
| A_68_P23527252 | chr5:21181527-21181571                            | NM_178728:25615        | Napepld       | INSIDE                 | 1.059                                                        | 1.949                          | 1063.57            | 2073.24            | 2.064                          | 729.43             | 1505.67            |
| A_68_P22236395 | chr3:93247993-93248037                            | NM_001163098:1763      | Tchh          | INSIDE                 | 1.059                                                        | 0.450                          | 4476.29            | 2013.62            | 0.476                          | 3550.11            | 1690.43            |
| A_68_P21796148 | chr2:160471963-160472007                          | NM_009408:352          | Top1          | INSIDE                 | 1.059                                                        | 0.281                          | 2217.23            | 623.57             | 0.298                          | 1651.08            | 491.53             |
| A_68_P33003688 | chr1_random:342766-342810                         | NM_177389:125          | Mia3          | INSIDE                 | 1.058                                                        | 0.404                          | 3440.91            | 1390.83            | 0.428                          | 2426.55            | 1037.76            |
| A_68_P31939721 | chr19:7497057-7497101                             | NM_175381:4964         | 2700081O15Rik | INSIDE                 | 1.058                                                        | 0.451                          | 3538.58            | 1595.62            | 0.477                          | 2459.77            | 1173.84            |
| A_68_P31925432 | chr19:4855210-4855254                             | NM_019861:104          | Ctsf          | INSIDE                 | 1.058                                                        | 0.410                          | 1569.12            | 644.06             | 0.434                          | 1161.53            | 504.26             |
| A_68_P31207757 | chr17:46728534-46728578                           | NM_175168:37897        | Pik7          | INSIDE                 | 1.058                                                        | 2.033                          | 1324.26            | 2691.64            | 2.150                          | 1011.12            | 2173.68            |
| A_68_P30633251 | chr16:28929310-28929354                           | NM_177718:452          | 1600021P15Rik | INSIDE                 | 1.058                                                        | 1.741                          | 1360.69            | 2369.11            | 1.843                          | 1057.82            | 1949.22            |
| A_68_P30588850 | chr16:20672735-20672779                           | NM_001005331:-65       | Eif4g1        | PROMOTER               | 1.058                                                        | 0.380                          | 3470.55            | 1317.66            | 0.402                          | 2485.24            | 998.20             |
| A_68_P30347860 | chr15:76199569-76199613                           | NM_021555:263          | Fam203a       | INSIDE                 | 1.058                                                        | 0.391                          | 1356.78            | 530.37             | 0.414                          | 1066.68            | 441.27             |
| A_68_P28356088 | chr12:36768830-36768874                           | NM_025359:213          | Tspan13       | INSIDE                 | 1.058                                                        | 0.154                          | 3175.15            | 487.90             | 0.163                          | 2256.95            | 366.97             |
| A_68_P28155138 | chr11:115626737-115626781                         | NM_028014:12           | 2310067B10Rik | INSIDE                 | 1.058                                                        | 0.362                          | 1310.12            | 473.93             | 0.383                          | 936.93             | 358.63             |
| A_68_P27896369 | chr11:69476075-69476120                           | NM_011900:47           | Mpdu1         | INSIDE                 | 1.058                                                        | 0.459                          | 1531.00            | 702.79             | 0.486                          | 1285.75            | 624.25             |
| A_68_P27750956 | chr11:43342693-43342737                           | NM_001045530:429       | Ccnj1         | INSIDE                 | 1.058                                                        | 0.334                          | 2252.04            | 752.46             | 0.354                          | 1772.04            | 626.48             |
| A_68_P27261657 | chr10:75837670-75837714                           | NM_008787:67965        | Pcnt          | INSIDE                 | 1.058                                                        | 2.921                          | 859.15             | 2509.51            | 3.092                          | 820.71             | 2537.43            |
| A_68_P27171640 | chr10:59414686-59414730                           | NM_029083:-190         | Ddit4         | PROMOTER               | 1.058                                                        | 0.426                          | 1909.88            | 813.61             | 0.451                          | 1534.23            | 691.56             |
| A_68_P26423570 | chr9:35382219-35382263                            | NM_001167603:8         | Gm6762        | INSIDE                 | 1.058                                                        | 3.650                          | 821.64             | 2998.70            | 3.863                          | 634.80             | 2451.93            |

| ProbeName      | Target position of probe on CpG island microarray | TargetID                  | GeneSymbol    | CpG island Description | Ratio of relative methylation (TiO <sub>2</sub> -NP/Vehicle) | Sham group                     |                    |                    | TiO <sub>2</sub> -H group      |                    |                    |
|----------------|---------------------------------------------------|---------------------------|---------------|------------------------|--------------------------------------------------------------|--------------------------------|--------------------|--------------------|--------------------------------|--------------------|--------------------|
|                |                                                   |                           |               |                        |                                                              | Relative methylation (Cy5/Cy3) | Cy3 signal (Input) | Cy5 signal (MeDIP) | Relative methylation (Cy5/Cy3) | Cy3 signal (Input) | Cy5 signal (MeDIP) |
| A_68_P23593766 | chr5:34669863-34669907                            | NM_011278:-9154           | Rnf4          | PROMOTER               | 1.058                                                        | 0.335                          | 2857.24            | 958.01             | 0.355                          | 2087.20            | 740.36             |
| A_68_P23345552 | chr4:137950860-137950904                          | NM_001081672:1491         | Fam43b        | INSIDE                 | 1.058                                                        | 0.472                          | 1154.21            | 545.14             | 0.500                          | 909.50             | 454.52             |
| A_68_P21059044 | chr2:22478107-22478151                            | NM_008078:282             | Gad2          | INSIDE                 | 1.058                                                        | 0.280                          | 3162.53            | 884.56             | 0.296                          | 2375.54            | 703.20             |
| A_68_P20960553 | chr2:30360113-3036057                             | NM_001081161:375          | Fam171a1      | INSIDE                 | 1.058                                                        | 2.170                          | 688.42             | 1494.19            | 2.296                          | 599.65             | 1376.65            |
| A_68_P32403977 | chrX:55292060-55292104                            | NM_009575:8278            | Zic3          | DOWNSTREAM             | 1.057                                                        | 2.328                          | 1433.02            | 3335.79            | 2.461                          | 1968.56            | 4844.77            |
| A_68_P31926781 | chr19:5082721-5082765                             | NM_001001885:2735         | Tmem151a      | INSIDE                 | 1.057                                                        | 1.813                          | 746.05             | 1352.68            | 1.917                          | 563.47             | 1080.34            |
| A_68_P31779043 | chr18:65243488-65243532                           | NM_031881:60330           | Nedd4l        | INSIDE                 | 1.057                                                        | 2.331                          | 1516.40            | 3533.99            | 2.463                          | 1232.81            | 3036.01            |
| A_68_P31400337 | chr17:84105870-84105914                           | NM_001171053:390          | Mia3          | INSIDE                 | 1.057                                                        | 0.444                          | 1094.69            | 486.31             | 0.469                          | 790.83             | 371.17             |
| A_68_P30244925 | chr15:57743868-57743912                           | NM_001167679:137          | Wdr67         | INSIDE                 | 1.057                                                        | 0.329                          | 3166.79            | 1041.47            | 0.347                          | 2248.17            | 781.16             |
| A_68_P28248078 | chr12:13255679-13255723                           | NM_134040:280             | Ddx1          | INSIDE                 | 1.057                                                        | 0.434                          | 1310.54            | 569.23             | 0.459                          | 939.51             | 431.33             |
| A_68_P28183252 | chr11:120098764-120098808                         | NM_198423:4526            | Bahce1        | INSIDE                 | 1.057                                                        | 1.627                          | 873.99             | 1422.37            | 1.719                          | 696.88             | 1198.22            |
| A_68_P25007799 | chr7:25790496-25790540                            | NM_144921:396             | Atpl1a3       | INSIDE                 | 1.057                                                        | 0.242                          | 4314.24            | 1045.27            | 0.256                          | 3173.59            | 812.67             |
| A_68_P20876660 | chr1:182499047-182499091                          | NM_007415:-37             | Parp1         | PROMOTER               | 1.057                                                        | 2.181                          | 465.38             | 1015.02            | 2.305                          | 380.82             | 877.82             |
| A_68_P31655270 | chr18:42554978-42555022                           | NM_138945:750             | Pou4f3        | INSIDE                 | 1.056                                                        | 0.464                          | 1692.92            | 785.49             | 0.490                          | 1297.67            | 635.52             |
| A_68_P31412120 | chr17:866087935-866087979                         | NM_011380:-362            | Six2          | PROMOTER               | 1.056                                                        | 10.037                         | 4122.90            | 41382.66           | 10.597                         | 3521.03            | 37310.67           |
| A_68_P31323856 | chr17:69766821-69766865                           | NR_026848:1056            | C030034122Rik | INSIDE                 | 1.056                                                        | 0.452                          | 2871.19            | 1297.47            | 0.477                          | 2095.99            | 999.99             |
| A_68_P30296518 | chr15:67008847-67008891                           | NM_009177:-424            | St3gal1       | PROMOTER               | 1.056                                                        | 0.401                          | 3786.05            | 1518.45            | 0.424                          | 2720.53            | 1152.68            |
| A_68_P30127811 | chr15:34236594-34236638                           | NM_016762:181             | Matn2         | INSIDE                 | 1.056                                                        | 0.489                          | 3056.15            | 1494.07            | 0.516                          | 2137.50            | 1103.96            |
| A_68_P28524527 | chr12:72237618-72237662                           | NM_001024853:22           | Timm9         | INSIDE                 | 1.056                                                        | 0.451                          | 2342.07            | 1055.28            | 0.476                          | 1756.84            | 836.02             |
| A_68_P28048724 | chr11:96976323-96976367                           | NM_019507:301             | Tbx21         | INSIDE                 | 1.056                                                        | 0.538                          | 2065.34            | 1110.56            | 0.568                          | 1377.82            | 782.47             |
| A_68_P27804274 | chr11:53163809-53163853                           | NM_033565:-438            | Aff4          | PROMOTER               | 1.056                                                        | 0.466                          | 1367.96            | 637.09             | 0.492                          | 1098.32            | 540.08             |
| A_68_P27649723 | chr11:24064200-24064244                           | NM_001159290:83528        | Bcl11a        | INSIDE                 | 1.056                                                        | 2.837                          | 1322.34            | 3751.89            | 2.996                          | 1147.20            | 3436.79            |
| A_68_P27416806 | chr10:105012019-105012063                         | NR_038032:434             | 9330159K06    | INSIDE                 | 1.056                                                        | 0.480                          | 1270.98            | 610.60             | 0.507                          | 970.82             | 492.52             |
| A_68_P27277400 | chr10:78996361-78996405                           | NM_015817:150             | Ppap2c        | INSIDE                 | 1.056                                                        | 0.592                          | 10992.16           | 6502.02            | 0.625                          | 6895.41            | 4308.36            |
| A_68_P26844378 | chr9:114293915-114293959                          | NM_019922:5894            | Crtap         | INSIDE                 | 1.056                                                        | 2.175                          | 557.04             | 1211.49            | 2.296                          | 519.73             | 1193.38            |
| A_68_P25971361 | chr8:77517617-77517661                            | NM_178017:37              | Hmgxb4        | INSIDE                 | 1.056                                                        | 0.431                          | 1116.33            | 481.32             | 0.455                          | 922.27             | 420.00             |
| A_68_P25452560 | chr7:124524755-124524799                          | NM_175645:284             | Xylt1         | INSIDE                 | 1.056                                                        | 3.283                          | 979.99             | 3217.76            | 3.469                          | 792.10             | 2747.65            |
| A_68_P25196754 | chr7:75097245-75097289                            | NM_010513:124             | Igflr         | INSIDE                 | 1.056                                                        | 0.278                          | 3364.79            | 933.82             | 0.293                          | 2384.60            | 698.85             |
| A_68_P23444292 | chr5:3342226-3342270                              | NM_009873:-2063           | Cdk6          | PROMOTER               | 1.056                                                        | 0.488                          | 1524.85            | 744.65             | 0.516                          | 1319.56            | 680.42             |
| A_68_P23437243 | chr4:154597315-154597359                          | NM_011385:-692            | Sk1           | PROMOTER               | 1.056                                                        | 0.393                          | 1937.00            | 762.16             | 0.415                          | 1427.04            | 592.69             |
| A_68_P23364089 | chr4:141001208-141001252                          | NM_009541:643             | Zbtb17        | INSIDE                 | 1.056                                                        | 1.668                          | 1739.23            | 2901.36            | 1.762                          | 1272.49            | 2242.26            |
| A_68_P23223132 | chr4:114729449-114729493                          | NM_011527:-2661           | Tal1          | PROMOTER               | 1.056                                                        | 0.169                          | 4549.89            | 769.24             | 0.178                          | 3450.48            | 615.79             |
| A_68_P21710711 | chr2:144993855-144993899                          | ENSMUST00000153249:222    |               | INSIDE                 | 1.056                                                        | 1.964                          | 721.84             | 1417.51            | 2.074                          | 495.36             | 1027.20            |
| A_68_P32707836 | chrX:138824951-138824995                          | NM_001033600:106          | Acs14         | INSIDE                 | 1.055                                                        | 2.751                          | 559.99             | 1540.81            | 2.903                          | 701.51             | 2036.36            |
| A_68_P30954380 | chr16:90011810-90011858                           | ENSMUST00000089084:132180 |               | INSIDE                 | 1.055                                                        | 2.062                          | 398.81             | 822.38             | 2.175                          | 361.37             | 785.92             |
| A_68_P29746359 | chr14:78936378-78936422                           | NM_001164503:267          | Akap11        | INSIDE                 | 1.055                                                        | 0.361                          | 1797.76            | 648.36             | 0.380                          | 1508.37            | 573.65             |
| A_68_P28696318 | chr12:104480308-104480352                         | NM_133364:26              | Prima1        | INSIDE                 | 1.055                                                        | 0.610                          | 2158.92            | 1316.40            | 0.643                          | 1657.14            | 1065.79            |
| A_68_P28067417 | chr11:100180968-100181012                         | NM_011508:-319            | Eif1          | PROMOTER               | 1.055                                                        | 0.367                          | 2430.29            | 892.04             | 0.387                          | 1899.91            | 735.45             |
| A_68_P28049002 | chr11:97012100-97012144                           | NM_198100:-1096           | Tbkbp1        | PROMOTER               | 1.055                                                        | 0.327                          | 7129.49            | 2333.93            | 0.345                          | 4725.36            | 1632.54            |
| A_68_P24008169 | chr5:115608781-115608825                          | NM_175403:-617            | Mlec          | PROMOTER               | 1.055                                                        | 0.442                          | 1170.64            | 517.82             | 0.467                          | 984.15             | 459.26             |
| A_68_P22129913 | chr3:51288449-51288493                            | NM_016858:583             | Rab33b        | INSIDE                 | 1.055                                                        | 0.335                          | 1717.44            | 575.82             | 0.354                          | 1466.51            | 518.83             |
| A_68_P21617373 | chr2:127952615-127952659                          | NM_009754:863             | Bcl2l1        | INSIDE                 | 1.055                                                        | 0.408                          | 1535.54            | 626.23             | 0.430                          | 1161.22            | 499.56             |
| A_68_P21094157 | chr2:28773265-28773309                            | NM_001164186:-1326        | Barhl1        | PROMOTER               | 1.055                                                        | 0.294                          | 2597.09            | 762.54             | 0.310                          | 1878.42            | 582.04             |
| A_68_P32464972 | chrX:71068859-71068903                            | NM_001029868:1428         | Pdzd4         | INSIDE                 | 1.054                                                        | 0.524                          | 1340.87            | 703.00             | 0.553                          | 1602.83            | 885.67             |
| A_68_P32181858 | chr19:53404585-53404629                           | NM_001008543:-329         | Mxil          | PROMOTER               | 1.054                                                        | 1.851                          | 4359.74            | 8070.26            | 1.952                          | 3297.05            | 6434.58            |
| A_68_P31924143 | chr19:4625643-4625687                             | NM_023131:-47             | Rce1          | PROMOTER               | 1.054                                                        | 1.486                          | 1990.78            | 2959.11            | 1.567                          | 1643.64            | 2576.16            |
| A_68_P31599397 | chr18:31919152-31919196                           | NM_153515:-359            | Ammecri1      | PROMOTER               | 1.054                                                        | 0.468                          | 2732.69            | 1278.39            | 0.493                          | 2046.79            | 1009.62            |
| A_68_P30574322 | chr16:17530755-17530799                           | NM_026909:369             | Thap7         | INSIDE                 | 1.054                                                        | 0.521                          | 2662.02            | 1385.94            | 0.549                          | 1827.13            | 1002.79            |
| A_68_P30351094 | chr15:76734935-76734983                           | NM_012053:458             | Rpl8          | INSIDE                 | 1.054                                                        | 2.582                          | 531.28             | 1371.88            | 2.722                          | 444.26             | 1209.30            |
| A_68_P29240038 | chr13:96095444-96095488                           | NR_035461:-5068           | Mir1940       | PROMOTER               | 1.054                                                        | 0.265                          | 2182.34            | 579.03             | 0.280                          | 1886.01            | 527.36             |
| A_68_P28615064 | chr12:88607770-88607814                           | NM_146036:115             | Ahsa1         | INSIDE                 | 1.054                                                        | 0.623                          | 1669.81            | 1039.97            | 0.657                          | 1362.78            | 894.92             |
| A_68_P27898021 | chr11:69749163-69749207                           | NM_016875:-216            | Ybx2          | PROMOTER               | 1.054                                                        | 0.536                          | 3492.13            | 1870.05            | 0.565                          | 2558.80            | 1444.58            |
| A_68_P27873632 | chr11:65621027-65621071                           | NM_026107:303             | Zkscan6       | INSIDE                 | 1.054                                                        | 3.878                          | 803.87             | 3117.46            | 4.086                          | 683.48             | 2792.41            |
| A_68_P26954150 | chr10:13685112-13685158                           | NM_010437:-1050           | Hivep2        | PROMOTER               | 1.054                                                        | 2.906                          | 1389.29            | 4036.74            | 3.063                          | 1166.58            | 3572.78            |
| A_68_P26897437 | A_68_P26897437                                    |                           | Unknown       | Unknown                | 1.054                                                        | 0.483                          | 1446.17            | 698.30             | 0.509                          | 1125.45            | 572.73             |
| A_68_P26814948 | chr9:108354920-108354964                          | NM_133744:-7906           | Ccde71        | PROMOTER               | 1.054                                                        | 0.469                          | 1517.93            | 711.22             | 0.494                          | 1162.04            | 574.14             |
| A_68_P26021285 | chr8:87230722-87230773                            | NM_001081981:67521        | Nfix          | DOWNSTREAM             | 1.054                                                        | 0.515                          | 1690.10            | 870.41             | 0.543                          | 1162.63            | 630.92             |
| A_68_P25285286 | chr7:91031153-91031197                            | NM_030705:1677            | Mesdc1        | INSIDE                 | 1.054                                                        | 2.180                          | 866.76             | 1889.60            | 2.298                          | 676.25             | 1554.37            |
| A_68_P25032101 | chr7:31337274-31337318                            | NM_183321:-5              | BC053749      | DIVERGENT_PROMOTER     | 1.054                                                        | 0.547                          | 2264.42            | 1239.13            | 0.577                          | 1585.67            | 914.27             |
| A_68_P24449045 | chr6:52154649-52154693                            | NM_010453:-84             | Hoxa5         | PROMOTER               | 1.054                                                        | 1.679                          | 1034.30            | 1736.48            | 1.769                          | 882.85             | 1562.05            |
| A_68_P23278477 | chr4:125826476-125826520                          | NM_172145:1252            | Fam176b       | INSIDE                 | 1.054                                                        | 0.543                          | 1227.54            | 666.84             | 0.573                          | 1124.44            | 643.84             |
| A_68_P23265704 | chr4:123668100-123668144                          |                           | Unknown       | Unknown                | 1.054                                                        | 0.315                          | 1402.07            | 442.29             | 0.332                          | 1091.09            | 362.78             |
| A_68_P21776097 | chr2:157104828-157104872                          | NM_019642:17              | Rpn2          | INSIDE                 | 1.054                                                        | 0.456                          | 3463.45            | 1579.28            | 0.481                          | 2697.78            | 1296.30            |
| A_68_P21736749 | chr2:149656814-149656858                          | NM_001085521:318          | Tmem90b       | INSIDE                 | 1.054                                                        | 0.481                          | 1346.95            | 647.50             | 0.507                          | 1077.83            | 546.20             |
| A_68_P21203200 | chr2:49474749-49474793                            | NM_008449:-63             | Kif5c         | PROMOTER               | 1.054                                                        | 0.388                          | 1252.49            | 485.99             | 0.409                          | 1008.17            | 412.31             |

| ProbeName      | Target position of probe on CpG island microarray | TargetID                | GeneSymbol    | CpG island Description | Ratio of relative methylation (TiO <sub>2</sub> -NP/Vehicle) | Sham group                     |                    |                    | TiO <sub>2</sub> -H group      |                    |                    |
|----------------|---------------------------------------------------|-------------------------|---------------|------------------------|--------------------------------------------------------------|--------------------------------|--------------------|--------------------|--------------------------------|--------------------|--------------------|
|                |                                                   |                         |               |                        |                                                              | Relative methylation (Cy5/Cy3) | Cy3 signal (Input) | Cy5 signal (MeDIP) | Relative methylation (Cy5/Cy3) | Cy3 signal (Input) | Cy5 signal (MeDIP) |
| A_68_P31932456 | chr19:6060898-6060957                             | NM_013859:-279          | Znhit2-ps     | PROMOTER               | 1.053                                                        | 11.335                         | 12903.78           | 146258.90          | 11.930                         | 12436.61           | 148365.70          |
| A_68_P31110054 | chr17:26552202-26552246                           | NM_001081656:315        | Neurl1b       | INSIDE                 | 1.053                                                        | 6.910                          | 1430.88            | 9887.10            | 7.279                          | 1022.67            | 7443.67            |
| A_68_P30348598 | chr15:76308251-76308295                           | NM_008296:398           | Hsf1          | INSIDE                 | 1.053                                                        | 0.572                          | 1847.48            | 1056.02            | 0.602                          | 1453.74            | 875.07             |
| A_68_P30348454 | chr15:76288272-76288316                           | NM_198885:427           | Sex           | INSIDE                 | 1.053                                                        | 0.474                          | 2259.15            | 1070.84            | 0.499                          | 1668.90            | 832.74             |
| A_68_P29385917 | chr14:8624251-8624295                             | ENSMUST00000081331:-107 |               | DIVERGENT_PROMOTER     | 1.053                                                        | 2.190                          | 1323.08            | 2898.02            | 2.306                          | 1117.40            | 2577.06            |
| A_68_P29050859 | chr13:54795572-54795616                           | NR_027395:-273          | Rnf44         | DIVERGENT_PROMOTER     | 1.053                                                        | 0.277                          | 3303.62            | 915.62             | 0.292                          | 2376.88            | 693.87             |
| A_68_P27542784 | chr10:128141723-128141767                         | NM_016756:363           | Cdk2          | INSIDE                 | 1.053                                                        | 0.367                          | 1829.82            | 670.76             | 0.386                          | 1576.60            | 608.47             |
| A_68_P27278459 | chr10:79180444-79180488                           | NM_008226:1088          | Hcn2          | INSIDE                 | 1.053                                                        | 0.357                          | 1345.24            | 480.44             | 0.376                          | 1140.91            | 428.90             |
| A_68_P22322663 | chr3:89764566-89764610                            | NM_001081182:2842       | Atp8b2        | INSIDE                 | 1.053                                                        | 2.248                          | 617.83             | 1389.00            | 2.368                          | 505.72             | 1197.53            |
| A_68_P21822532 | chr2:165058963-165059007                          | NM_174988:1253          | Cdh22         | INSIDE                 | 1.053                                                        | 0.506                          | 2849.12            | 1442.04            | 0.533                          | 2233.77            | 1190.60            |
| A_68_P29001576 | chr13:45485361-45485405                           | NM_181043:57            | Myliip        | INSIDE                 | 1.052                                                        | 1.937                          | 1772.12            | 3431.99            | 2.037                          | 1316.39            | 2681.69            |
| A_68_P28917611 | chr13:30637211-30637255                           | NM_025710:-47           | Uqcrfsl       | PROMOTER               | 1.052                                                        | 0.332                          | 1401.32            | 465.46             | 0.349                          | 1120.83            | 391.65             |
| A_68_P28598365 | chr12:85791528-85791574                           | NM_134042:350           | Aldh6a1       | INSIDE                 | 1.052                                                        | 0.360                          | 1392.25            | 500.73             | 0.378                          | 946.81             | 358.26             |
| A_68_P27882410 | chr11:67112201-67112246                           | NM_177369:21598         | Myh8          | INSIDE                 | 1.052                                                        | 2.396                          | 301.16             | 721.59             | 2.522                          | 306.09             | 771.86             |
| A_68_P27288888 | chr10:80788031-80788075                           | NM_027381:4205          | 2510012J08Rik | INSIDE                 | 1.052                                                        | 2.365                          | 1033.60            | 2444.79            | 2.487                          | 866.02             | 2153.92            |
| A_68_P26973141 | chr10:17742602-17742646                           | NM_028440:434           | 3110003A17Rik | INSIDE                 | 1.052                                                        | 0.383                          | 3356.74            | 1285.56            | 0.403                          | 2301.82            | 927.18             |
| A_68_P25655776 | chr8:11478793-11478843                            | NM_011227:-319          | Rab20         | PROMOTER               | 1.052                                                        | 5.066                          | 3959.58            | 20060.63           | 5.328                          | 2328.20            | 12404.53           |
| A_68_P25095551 | chr7:53121751-53121795                            | NM_008172:279           | Grin2d        | INSIDE                 | 1.052                                                        | 1.996                          | 674.47             | 1346.54            | 2.101                          | 571.04             | 1199.74            |
| A_68_P24127041 | chr5:138125324-138125368                          | NM_178162:499           | Agfig2        | INSIDE                 | 1.052                                                        | 0.527                          | 2428.91            | 1279.11            | 0.554                          | 1854.67            | 1027.71            |
| A_68_P22373077 | chr3:100884149-100884197                          | NM_011197:29917         | Ptgifn        | INSIDE                 | 1.052                                                        | 0.495                          | 1549.90            | 767.53             | 0.521                          | 1092.56            | 569.10             |
| A_68_P20616246 | chr1:133423879-133423923                          | NM_001081011:38         | Srgap2        | INSIDE                 | 1.052                                                        | 0.105                          | 6359.93            | 667.77             | 0.110                          | 4263.79            | 470.97             |
| A_68_P29237614 | chr13:95655500-95655544                           | NM_011021:9941          | Otp           | DOWNSTREAM             | 1.051                                                        | 3.429                          | 287.95             | 987.44             | 3.603                          | 224.97             | 810.50             |
| A_68_P28740918 | chr12:112127848-112127892                         | NM_001081057:397        | Tecpr2        | INSIDE                 | 1.051                                                        | 0.363                          | 2180.09            | 790.41             | 0.381                          | 1458.69            | 555.96             |
| A_68_P27559369 | chr11:4646659-4646703                             | NM_138948:101           | Cabp7         | INSIDE                 | 1.051                                                        | 0.523                          | 1343.44            | 702.95             | 0.550                          | 1026.94            | 564.96             |
| A_68_P26818138 | chr9:108976646-108976690                          | NM_172774:-30           | Atrip         | PROMOTER               | 1.051                                                        | 0.279                          | 2285.60            | 637.01             | 0.293                          | 1535.26            | 449.67             |
| A_68_P2596047  | chr8:82235719-82235763                            | NM_026904:22            | Anapc10       | INSIDE                 | 1.051                                                        | 0.151                          | 6019.94            | 911.02             | 0.159                          | 3743.45            | 595.29             |
| A_68_P24850991 | chr6:131383858-131383902                          |                         |               | Unknown                | 1.051                                                        | 0.458                          | 2592.61            | 1186.17            | 0.481                          | 2082.47            | 1001.50            |
| A_68_P24759852 | chr6:113445089-113445133                          | NM_172487:6702          | Prrt3         | INSIDE                 | 1.051                                                        | 1.911                          | 1326.85            | 2535.73            | 2.009                          | 1063.98            | 2137.05            |
| A_68_P21820159 | chr2:164682781-164682825                          | NM_011125:406           | Pltp          | INSIDE                 | 1.051                                                        | 3.466                          | 524.17             | 1816.53            | 3.643                          | 404.10             | 1472.00            |
| A_68_P31561529 | chr18:24868269-24868313                           | NM_175276:345           | Fhod3         | INSIDE                 | 1.050                                                        | 1.527                          | 934.10             | 1426.13            | 1.603                          | 792.91             | 1270.65            |
| A_68_P31540308 | chr18:20716974-20717018                           | NM_007883:380           | Dsg2          | INSIDE                 | 1.050                                                        | 0.332                          | 1651.66            | 547.84             | 0.348                          | 1162.14            | 404.80             |
| A_68_P31052339 | chr17:12700068-12700112                           | NM_011395:480           | Slc22a3       | INSIDE                 | 1.050                                                        | 0.433                          | 2018.42            | 873.58             | 0.454                          | 1382.22            | 627.87             |
| A_68_P30481497 | chr15:99481812-99481856                           | NM_012025:218           | Racgap1       | INSIDE                 | 1.050                                                        | 0.424                          | 7793.93            | 3303.31            | 0.445                          | 5823.43            | 2592.14            |
| A_68_P29733552 | chr14:76816020-76816064                           | NM_207652:415           | Tsc22d1       | INSIDE                 | 1.050                                                        | 0.455                          | 1961.47            | 893.01             | 0.478                          | 1415.26            | 676.60             |
| A_68_P25596369 | chr7:149846334-149846578                          | NM_001122736:384        | Igf2          | INSIDE                 | 1.050                                                        | 0.384                          | 1867.57            | 717.46             | 0.403                          | 1474.67            | 594.97             |
| A_68_P25578902 | chr7:146768759-146768803                          | NR_027857:-84           | Nkx6-2        | PROMOTER               | 1.050                                                        | 0.397                          | 1284.05            | 509.95             | 0.417                          | 1021.49            | 425.83             |
| A_68_P24477003 | chr6:56781975-56782019                            | NM_012056:-56           | Fkbp9         | PROMOTER               | 1.050                                                        | 3.267                          | 861.11             | 2813.19            | 3.430                          | 698.74             | 2396.35            |
| A_68_P24338523 | chr6:31513635-31513679                            | NM_013723:281           | Podxl         | INSIDE                 | 1.050                                                        | 0.529                          | 1454.84            | 769.90             | 0.555                          | 1220.74            | 678.10             |
| A_68_P22303234 | chr3:86350689-86350733                            | NM_011839:1495          | Mab21l2       | INSIDE                 | 1.050                                                        | 0.242                          | 3107.88            | 751.28             | 0.254                          | 2288.37            | 580.72             |
| A_68_P21334161 | chr2:73730794-73730838                            | NM_001025093:-131       | Atf2          | PROMOTER               | 1.050                                                        | 0.290                          | 1559.25            | 452.04             | 0.305                          | 1091.75            | 332.48             |
| A_68_P21110488 | chr2:31509792-31509836                            | NM_001123362:14258      | Prdm12        | INSIDE                 | 1.050                                                        | 0.329                          | 3165.39            | 1040.87            | 0.345                          | 2716.35            | 937.84             |
| A_68_P21107212 | chr2:30996536-30996580                            | NM_001038700:970        | Fnbp1         | INSIDE                 | 1.050                                                        | 0.321                          | 1791.14            | 575.66             | 0.338                          | 1301.59            | 439.36             |
| A_68_P21004675 | chr2:11093849-11093893                            | NM_008859:-138          | Prkcq         | PROMOTER               | 1.050                                                        | 1.758                          | 907.02             | 1594.38            | 1.845                          | 675.25             | 1246.00            |
| A_68_P32040193 | chr19:27398062-27398106                           | NM_183179:976           | Kcnv2         | INSIDE                 | 1.049                                                        | 1.609                          | 1947.47            | 3133.66            | 1.688                          | 1600.87            | 2702.61            |
| A_68_P31334607 | chr17:71824822-71824866                           | NM_028887:-161          | Smelhd1       | PROMOTER               | 1.049                                                        | 1.638                          | 1188.26            | 1945.85            | 1.718                          | 969.58             | 1665.65            |
| A_68_P29052703 | chr13:55097861-55097905                           | NM_153131:47090         | Unc5a         | INSIDE                 | 1.049                                                        | 1.733                          | 952.52             | 1651.03            | 1.819                          | 807.31             | 1468.19            |
| A_68_P28587835 | chr12:83718196-83718240                           | NM_015812:194           | Rgs6          | INSIDE                 | 1.049                                                        | 0.438                          | 1773.81            | 776.77             | 0.459                          | 1511.61            | 694.49             |
| A_68_P27473556 | chr10:115550730-115550774                         | NM_001161855:221        | 4933416C03Rik | INSIDE                 | 1.049                                                        | 2.139                          | 577.24             | 1234.85            | 2.244                          | 502.42             | 1127.29            |
| A_68_P26845381 | chr9:114473232-114473276                          | NM_001042503:233        | Trim71        | INSIDE                 | 1.049                                                        | 9.185                          | 657.33             | 6037.71            | 9.634                          | 612.52             | 5901.16            |
| A_68_P26421596 | chr9:35075089-35075133                            | NM_194257:242           | Fam118b       | INSIDE                 | 1.049                                                        | 0.490                          | 1056.19            | 517.59             | 0.514                          | 827.51             | 425.32             |
| A_68_P25954407 | chr8:73363491-73363535                            | NM_027560:107           | Armdc2        | INSIDE                 | 1.049                                                        | 0.188                          | 4530.78            | 853.53             | 0.198                          | 2614.60            | 516.52             |
| A_68_P25409556 | chr7:116847071-116847115                          | NM_020616:-158          | D930014E17Rik | PROMOTER               | 1.049                                                        | 0.308                          | 2814.73            | 866.47             | 0.323                          | 2032.70            | 656.29             |
| A_68_P25046332 | chr7:35697322-35697366                            | NM_008820:-81           | Pepd          | PROMOTER               | 1.049                                                        | 4.446                          | 3266.03            | 14520.50           | 4.663                          | 2500.78            | 11661.35           |
| A_68_P21113256 | chr2:31944358-31944408                            | NM_175511:-5157         | Fam78a        | DIVERGENT_PROMOTER     | 1.049                                                        | 0.271                          | 1721.61            | 467.14             | 0.285                          | 1237.71            | 352.20             |
| A_68_P31933635 | chr19:6276972-6277016                             | NM_010119:99            | Ehd1          | INSIDE                 | 1.048                                                        | 1.676                          | 1345.94            | 2256.06            | 1.757                          | 1027.64            | 1805.41            |
| A_68_P29982087 | chr15:5066180-5066224                             | NM_026069:-410          | Rpl37         | DIVERGENT_PROMOTER     | 1.048                                                        | 0.433                          | 1790.28            | 775.42             | 0.454                          | 1173.36            | 532.59             |
| A_68_P27278227 | chr10:79144709-79144753                           | NM_177613:-209          | Cdc34         | PROMOTER               | 1.048                                                        | 0.488                          | 2278.94            | 1111.44            | 0.511                          | 1770.89            | 905.01             |
| A_68_P25262740 | chr7:86860262-86860307                            | NM_010626:-1212         | Kif7          | PROMOTER               | 1.048                                                        | 0.554                          | 1968.17            | 1090.08            | 0.581                          | 1534.69            | 891.10             |
| A_68_P23588237 | chr5:33678644-33678688                            | NM_021500:446           | Maea          | INSIDE                 | 1.048                                                        | 3.096                          | 1524.85            | 4720.51            | 3.245                          | 1244.89            | 4039.92            |
| A_68_P22550732 | chr3:134875583-134875627                          | NM_173762:78            | Cenpe         | INSIDE                 | 1.048                                                        | 0.471                          | 1188.96            | 560.26             | 0.494                          | 955.24             | 471.74             |
| A_68_P21747903 | chr2:151969066-151969110                          | NM_009328:-256          | Tcf15         | PROMOTER               | 1.048                                                        | 0.452                          | 1183.00            | 535.29             | 0.474                          | 906.03             | 429.77             |
| A_68_P21666834 | chr2:136940556-136940600                          | NM_013822:1678          | Jag1          | INSIDE                 | 1.048                                                        | 0.571                          | 2187.26            | 1248.24            | 0.598                          | 1651.17            | 987.26             |
| A_68_P21061191 | chr2:22895186-22895230                            | NM_001077190:552        | Abil          | INSIDE                 | 1.048                                                        | 0.351                          | 1498.10            | 502.49             | 0.351                          | 1302.17            | 457.69             |
| A_68_P33007144 | chr9_random:49674-49720                           | NR_015516:-3712         | 49305261I5Rik | PROMOTER               | 1.047                                                        | 26.196                         | 545.09             | 14278.92           | 27.434                         | 313.56             | 8602.31            |
| A_68_P30425290 | chr15:89288093-89288138                           | NM_021921:3774          | Mapk8ip2      | INSIDE                 | 1.047                                                        | 1.620                          | 1150.92            | 1864.06            | 1.695                          | 950.05             | 1610.33            |

| ProbeName      | Target position of probe on CpG island microarray | TargetID            | GeneSymbol    | CpG island Description | Ratio of relative methylation (TiO <sub>2</sub> -NP/Vehicle) | Sham group                     |                    |                    |  | TiO <sub>2</sub> -H group      |                    |                    |
|----------------|---------------------------------------------------|---------------------|---------------|------------------------|--------------------------------------------------------------|--------------------------------|--------------------|--------------------|--|--------------------------------|--------------------|--------------------|
|                |                                                   |                     |               |                        |                                                              | Relative methylation (Cy5/Cy3) | Cy3 signal (Input) | Cy5 signal (MeDIP) |  | Relative methylation (Cy5/Cy3) | Cy3 signal (Input) | Cy5 signal (MeDIP) |
| A_68_P29075361 | chr13:58909630-58909674                           | NM_001025074:459    | Ntrk2         | INSIDE                 | 1.047                                                        | 0.282                          | 1774.52            | 500.73             |  | 0.296                          | 1398.04            | 413.14             |
| A_68_P28925106 | chr13:31899841-31899885                           | NM_008592:1348      | Foxo1         | INSIDE                 | 1.047                                                        | 1.630                          | 7676.40            | 12512.61           |  | 1.707                          | 6285.91            | 10729.88           |
| A_68_P27568394 | chr11:6315574-6315618                             | NM_008907:276       | Ppia          | PROMOTER               | 1.047                                                        | 0.153                          | 3425.99            | 524.85             |  | 0.160                          | 2460.98            | 394.92             |
| A_68_P26876196 | chr9:120036691-120036735                          | NM_011029:171       | Rpsa          | PROMOTER               | 1.047                                                        | 1.821                          | 461.71             | 840.95             |  | 1.907                          | 506.44             | 965.83             |
| A_68_P26084863 | chr8:98240210-98240254                            | NM_001035123:420    | Setd6         | INSIDE                 | 1.047                                                        | 0.331                          | 2006.21            | 663.65             |  | 0.346                          | 1425.74            | 493.86             |
| A_68_P25411817 | chr7:117265589-117265633                          | NM_009516:38        | Wee1          | INSIDE                 | 1.047                                                        | 0.295                          | 2179.41            | 643.56             |  | 0.309                          | 1556.60            | 481.08             |
| A_68_P24942895 | chr6:148894085-148894129                          | NM_019643:848       | Fam60a        | INSIDE                 | 1.047                                                        | 0.526                          | 1004.15            | 527.68             |  | 0.550                          | 909.37             | 500.48             |
| A_68_P24543641 | chr6:72739120-72739164                            | NM_001079822:-192   | Tcf7l1        | PROMOTER               | 1.047                                                        | 0.400                          | 3632.65            | 1451.47            |  | 0.418                          | 2528.89            | 1057.66            |
| A_68_P24222133 | chr6:7643105-7643149                              | NM_012055:56        | Asns          | INSIDE                 | 1.047                                                        | 0.618                          | 1628.51            | 1007.08            |  | 0.648                          | 1314.69            | 851.45             |
| A_68_P24055345 | chr5:123821191-123821247                          | NM_029850:26762     | Bcl7a         | INSIDE                 | 1.047                                                        | 1.814                          | 591.32             | 1072.89            |  | 1.899                          | 511.42             | 971.42             |
| A_68_P23561108 | chr5:28492702-28492746                            | NM_010134:489       | En2           | INSIDE                 | 1.047                                                        | 0.499                          | 1298.59            | 648.53             |  | 0.523                          | 1068.12            | 558.51             |
| A_68_P31317443 | chr17:68623323-68623367                           | NM_177278:208       | L3mbtl4       | INSIDE                 | 1.046                                                        | 0.487                          | 2197.81            | 1070.46            |  | 0.510                          | 1604.63            | 817.80             |
| A_68_P31100173 | chr17:25033768-25033812                           | NM_019730:346       | Nmc3          | INSIDE                 | 1.046                                                        | 0.398                          | 1681.94            | 669.54             |  | 0.417                          | 1217.75            | 507.25             |
| A_68_P30961703 | chr16:91227699-91227743                           | NM_016967:1926      | Olig2         | INSIDE                 | 1.046                                                        | 0.542                          | 3383.85            | 1834.96            |  | 0.567                          | 2477.53            | 1405.40            |
| A_68_P30956056 | chr16:90283863-90283907                           | NM_178923:786       | Scaf4         | INSIDE                 | 1.046                                                        | 1.890                          | 1116.02            | 2108.88            |  | 1.977                          | 949.03             | 1876.01            |
| A_68_P29689304 | chr14:68742856-68742900                           | NM_008691:183       | Nefin         | INSIDE                 | 1.046                                                        | 0.639                          | 1907.91            | 1219.60            |  | 0.669                          | 1668.32            | 1115.36            |
| A_68_P27894483 | chr11:69160115-69160159                           | NM_146019:22792     | Chd3          | INSIDE                 | 1.046                                                        | 1.731                          | 525.65             | 910.08             |  | 1.811                          | 500.42             | 906.42             |
| A_68_P25956626 | chr8:73904570-73904614                            | NM_010150:1259      | Nr2f6         | INSIDE                 | 1.046                                                        | 2.431                          | 815.18             | 1981.98            |  | 2.543                          | 649.32             | 1651.22            |
| A_68_P25574422 | chr7:146038351-146038395                          | NM_026391:304       | Ppp2r2d       | INSIDE                 | 1.046                                                        | 0.674                          | 3842.92            | 2591.89            |  | 0.706                          | 2962.56            | 2090.64            |
| A_68_P24459343 | chr6:53769427-53769471                            | NM_025817:1371      | Tril          | INSIDE                 | 1.046                                                        | 0.307                          | 1827.17            | 561.67             |  | 0.321                          | 1545.89            | 496.89             |
| A_68_P23270359 | chr4:124479600-124479644                          | NM_008636:-170      | Mtf1          | PROMOTER               | 1.046                                                        | 1.450                          | 1238.41            | 1795.20            |  | 1.516                          | 1116.10            | 1692.25            |
| A_68_P22880596 | chr4:45024872-45024916                            | NM_001163283:390    | Zbtb5         | INSIDE                 | 1.046                                                        | 0.650                          | 2974.93            | 1932.87            |  | 0.679                          | 2174.76            | 1477.52            |
| A_68_P22321219 | chr3:89519590-89519634                            | NM_001038587:669    | Adar          | INSIDE                 | 1.046                                                        | 0.503                          | 5965.23            | 3002.12            |  | 0.526                          | 4257.31            | 2240.89            |
| A_68_P21436189 | chr2:93487479-93487523                            | NM_007442:4910      | Alx4          | INSIDE                 | 1.046                                                        | 1.455                          | 2888.44            | 4202.76            |  | 1.522                          | 2303.53            | 3504.97            |
| A_68_P31106382 | chr17:25945536-25945580                           | NM_001164225:-471   | Fbxl16        | PROMOTER               | 1.045                                                        | 0.208                          | 2687.99            | 558.74             |  | 0.217                          | 1871.05            | 406.59             |
| A_68_P30970946 | chr16:92697084-92697128                           | NM_001111023:467    | Runx1         | INSIDE                 | 1.045                                                        | 0.548                          | 1403.81            | 769.21             |  | 0.572                          | 1073.70            | 614.58             |
| A_68_P29668499 | chr14:65206535-65206579                           | NR_029813:-2937     | Mir124a-1     | PROMOTER               | 1.045                                                        | 0.109                          | 5036.82            | 547.12             |  | 0.114                          | 3794.88            | 430.79             |
| A_68_P29102444 | chr13:65342538-65342582                           |                     |               | Unknown                | 1.045                                                        | 0.426                          | 1556.79            | 662.93             |  | 0.445                          | 1201.03            | 534.34             |
| A_68_P27033724 | chr10:28916766-28916810                           | NM_026138:52987     | 6330407J23Rik | INSIDE                 | 1.045                                                        | 1.937                          | 1990.19            | 3854.35            |  | 2.024                          | 1485.80            | 3006.65            |
| A_68_P27003030 | chr10:23069823-23069869                           | NM_010167:-137      | Eya4          | PROMOTER               | 1.045                                                        | 4.050                          | 512.07             | 2073.66            |  | 4.231                          | 481.51             | 2037.32            |
| A_68_P26388504 | chr9:29219516-29219560                            | NM_172290:551176    | Ntm           | INSIDE                 | 1.045                                                        | 0.504                          | 1936.52            | 976.10             |  | 0.527                          | 1450.96            | 764.40             |
| A_68_P26203093 | chr8:120022311-120022355                          | NM_172285:142       | Pleg2         | INSIDE                 | 1.045                                                        | 0.325                          | 1517.28            | 493.25             |  | 0.340                          | 1190.61            | 404.65             |
| A_68_P25422111 | chr7:119166689-119166733                          | NM_133758:-309      | Usp47         | PROMOTER               | 1.045                                                        | 0.549                          | 1495.47            | 820.76             |  | 0.574                          | 1283.57            | 736.15             |
| A_68_P24979911 | chr7:16730509-16730553                            | NM_148946:14882     | Slc8a2        | INSIDE                 | 1.045                                                        | 1.385                          | 1481.72            | 2051.87            |  | 1.447                          | 1234.62            | 1786.14            |
| A_68_P24049902 | chr5:122804456-122804500                          | NM_019780:57        | Vps29         | INSIDE                 | 1.045                                                        | 0.626                          | 2934.58            | 1837.27            |  | 0.655                          | 2108.90            | 1380.32            |
| A_68_P23542950 | chr5:24104639-24104683                            | NM_025891:3160      | Smardc3       | INSIDE                 | 1.045                                                        | 0.297                          | 3777.66            | 1122.40            |  | 0.311                          | 2484.45            | 771.46             |
| A_68_P22481651 | chr3:121996059-121996103                          | NR_030439:541       | Mir760        | DOWNSTREAM             | 1.045                                                        | 3.008                          | 680.46             | 2046.57            |  | 3.142                          | 493.29             | 1549.94            |
| A_68_P21867217 | chr2:172847468-172847512                          | NM_019547:88        | Rbm38         | INSIDE                 | 1.045                                                        | 0.637                          | 4526.57            | 2885.17            |  | 0.666                          | 3339.60            | 2223.39            |
| A_68_P21425690 | chr2:91804013-91804057                            | NM_138306:314       | Dgkz          | PROMOTER               | 1.045                                                        | 0.607                          | 1897.28            | 1151.09            |  | 0.634                          | 1345.16            | 852.81             |
| A_68_P20802626 | chr1:168930754-168930798                          | NM_001160261:-771   | Fam78b        | DIVERGENT_PROMOTER     | 1.045                                                        | 0.285                          | 4622.37            | 1315.89            |  | 0.298                          | 3650.64            | 1086.25            |
| A_68_P32743940 | chrX:147482252-147482296                          | NM_008001:499       | Fgd1          | INSIDE                 | 1.044                                                        | 3.471                          | 397.38             | 1379.11            |  | 3.625                          | 439.72             | 1593.94            |
| A_68_P32145760 | chr19:46836584-46836628                           | NM_001102471:508    | Cnnm2         | INSIDE                 | 1.044                                                        | 0.496                          | 2655.22            | 1318.26            |  | 0.518                          | 1702.01            | 881.86             |
| A_68_P31863856 | chr18:80560394-80560438                           | NM_001190373:577    | Kcng2         | INSIDE                 | 1.044                                                        | 2.150                          | 909.41             | 1955.11            |  | 2.245                          | 838.05             | 1881.65            |
| A_68_P31425154 | chr17:88197235-88197279                           | NM_199251:78        | Kcnk12        | INSIDE                 | 1.044                                                        | 0.292                          | 1970.44            | 575.68             |  | 0.305                          | 1607.53            | 490.33             |
| A_68_P31306706 | chr17:66869156-66869200                           | NM_024448:-168      | Rab12         | PROMOTER               | 1.044                                                        | 0.354                          | 2436.75            | 862.78             |  | 0.370                          | 1854.29            | 685.54             |
| A_68_P31117100 | chr17:27692460-27692504                           | NM_001025427:-1036  | Hmgal         | PROMOTER               | 1.044                                                        | 0.618                          | 1841.47            | 1137.47            |  | 0.645                          | 1445.91            | 932.39             |
| A_68_P30585934 | chr16:20097708-20097752                           | NM_029436:104       | Klhl24        | INSIDE                 | 1.044                                                        | 2.883                          | 831.37             | 2396.95            |  | 3.009                          | 646.09             | 1944.30            |
| A_68_P27949791 | chr11:79404266-79404312                           | NM_175543:-425      | Rab11fip4     | PROMOTER               | 1.044                                                        | 1.580                          | 969.43             | 1531.52            |  | 1.650                          | 746.93             | 1232.37            |
| A_68_P27302609 | A_68_P27302609                                    |                     |               | Unknown                | 1.044                                                        | 1.829                          | 926.12             | 1694.15            |  | 1.911                          | 700.14             | 1337.73            |
| A_68_P26772684 | chr9:100977961-100978005                          | NM_001100451:468    | Msl2          | PROMOTER               | 1.044                                                        | 0.652                          | 4309.42            | 2808.43            |  | 0.680                          | 2887.70            | 1964.41            |
| A_68_P25524902 | chr7:138009122-138009166                          | NM_133942:-279      | Pleckha1      | PROMOTER               | 1.044                                                        | 1.732                          | 597.84             | 1035.76            |  | 1.808                          | 526.00             | 951.22             |
| A_68_P23540260 | chr5:23670805-23670849                            | NM_153092:46        | Nupl2         | INSIDE                 | 1.044                                                        | 0.530                          | 1320.41            | 700.33             |  | 0.554                          | 1056.49            | 585.18             |
| A_68_P23397714 | chr4:148326567-148326611                          | NM_001159344:148088 | Cas2l         | INSIDE                 | 1.044                                                        | 0.147                          | 5247.25            | 772.95             |  | 0.154                          | 3543.21            | 544.88             |
| A_68_P32020395 | chr19:23967551-23967595                           | NM_177034:134207    | Apba1         | INSIDE                 | 1.043                                                        | 2.510                          | 1164.33            | 2922.39            |  | 2.618                          | 945.19             | 2474.25            |
| A_68_P30348905 | chr15:76353796-76353840                           | NM_130893:-1259     | Sertl         | PROMOTER               | 1.043                                                        | 0.646                          | 2808.74            | 1815.41            |  | 0.674                          | 2154.59            | 1452.56            |
| A_68_P29092064 | chr13:63341467-63341511                           | NM_028079:225195    | 201011101Rik  | INSIDE                 | 1.043                                                        | 2.141                          | 3939.04            | 8433.08            |  | 2.233                          | 2893.35            | 6461.08            |
| A_68_P27843676 | chr11:60352657-60352701                           | NM_172943:1494      | Alkbh5        | INSIDE                 | 1.043                                                        | 2.208                          | 1290.97            | 2849.84            |  | 2.302                          | 955.32             | 2199.48            |
| A_68_P27623990 | chr11:18918980-18919024                           | NM_001193271:-30    | Meis1         | PROMOTER               | 1.043                                                        | 0.453                          | 1059.42            | 480.30             |  | 0.473                          | 761.84             | 360.29             |
| A_68_P26887824 | chr9:122076106-122076150                          | NM_001164572:49745  | Snrk          | INSIDE                 | 1.043                                                        | 1.694                          | 2290.55            | 3879.77            |  | 1.766                          | 1667.70            | 2945.56            |
| A_68_P26477006 | chr9:45762946-45762990                            | NM_172257:364       | Sid2          | INSIDE                 | 1.043                                                        | 2.091                          | 1113.08            | 2327.61            |  | 2.181                          | 871.18             | 1899.97            |
| A_68_P26313786 | chr9:13632306-13632350                            | NM_176836:158       | Fam76b        | INSIDE                 | 1.043                                                        | 0.402                          | 2931.39            | 1178.97            |  | 0.420                          | 2155.36            | 904.24             |
| A_68_P25588514 | chr7:148577796-148577840                          | NM_011528:-240      | Taldo1        | PROMOTER               | 1.043                                                        | 1.764                          | 1182.22            | 2085.08            |  | 1.839                          | 927.80             | 1706.38            |
| A_68_P24056049 | chr5:123958827-123958871                          | NM_198611:-1620     | B3gnt4        | PROMOTER               | 1.043                                                        | 0.381                          | 2624.66            | 1000.18            |  | 0.397                          | 1812.46            | 720.10             |
| A_68_P23541736 | chr5:23931307-23931351                            | NM_009207:279       | Slc4a2        | INSIDE                 | 1.043                                                        | 0.455                          | 2116.35            | 962.58             |  | 0.474                          | 1778.63            | 843.52             |
| A_68_P23437421 | chr4:154624224-154624268                          | NM_001190445:172    | 2610002J02Rik | INSIDE                 | 1.043                                                        | 0.290                          | 3543.97            | 1028.67            |  | 0.303                          | 2782.09            | 842.27             |

| ProbeName      | Target position of probe on CpG island microarray | TargetID                 | GeneSymbol    | CpG island Description | Ratio of relative methylation (TiO <sub>2</sub> -NP/Vehicle) | Sham group                     |                    |                    | TiO <sub>2</sub> -H group      |                    |                    |
|----------------|---------------------------------------------------|--------------------------|---------------|------------------------|--------------------------------------------------------------|--------------------------------|--------------------|--------------------|--------------------------------|--------------------|--------------------|
|                |                                                   |                          |               |                        |                                                              | Relative methylation (Cy5/Cy3) | Cy3 signal (Input) | Cy5 signal (MeDIP) | Relative methylation (Cy5/Cy3) | Cy3 signal (Input) | Cy5 signal (MeDIP) |
| A_68_P21334259 | chr2:73748831-73748875                            | NM_175015:499            | Atp5g3        | INSIDE                 | 1.043                                                        | 0.194                          | 2299.96            | 445.18             | 0.202                          | 1625.84            | 328.13             |
| A_68_P32227000 | chr19:60832730-60832774                           | NM_178421:863            | Nanos1        | INSIDE                 | 1.042                                                        | 1.793                          | 2551.15            | 4574.86            | 1.869                          | 1819.55            | 3401.17            |
| A_68_P32134051 | chr19:44808722-44808771                           |                          |               | Unknown                | 1.042                                                        | 2.016                          | 778.16             | 1569.10            | 2.102                          | 494.69             | 1039.64            |
| A_68_P31112724 | chr17:26978218-26978262                           | NM_008700:270            | Nkx2-5        | INSIDE                 | 1.042                                                        | 0.305                          | 2495.77            | 761.65             | 0.318                          | 1926.59            | 612.51             |
| A_68_P30575793 | chr16:17804490-17804534                           | NM_153790:7138           | Scarf2        | INSIDE                 | 1.042                                                        | 0.427                          | 1942.08            | 828.34             | 0.444                          | 1473.27            | 654.81             |
| A_68_P30546008 | chr16:11066855-11066899                           | NM_009223:486            | Snn           | INSIDE                 | 1.042                                                        | 0.218                          | 3383.84            | 737.86             | 0.227                          | 2406.37            | 546.55             |
| A_68_P30486489 | chr15:100408980-100409024                         | NM_010127:7794           | Pou6f1        | INSIDE                 | 1.042                                                        | 1.869                          | 445.77             | 833.00             | 1.946                          | 469.97             | 914.71             |
| A_68_P28529997 | chr12:73171347-73171391                           | NM_181752:610            | Gpr135        | INSIDE                 | 1.042                                                        | 2.221                          | 1758.25            | 3904.92            | 2.315                          | 1460.06            | 3379.45            |
| A_68_P27805840 | chr11:53449647-53449691                           | NM_008355:1464           | Il13          | PROMOTER               | 1.042                                                        | 0.372                          | 1573.75            | 585.33             | 0.388                          | 1238.19            | 479.84             |
| A_68_P27278589 | chr10:79197977-79198021                           | NM_008226:18620          | Hcn2          | INSIDE                 | 1.042                                                        | 1.772                          | 708.62             | 1255.58            | 1.846                          | 769.34             | 1420.18            |
| A_68_P26659608 | chr9:78291066-78291110                            | NM_173386:134            | E330016A19Rik | DIVERGENT_PROMOTER     | 1.042                                                        | 0.436                          | 1510.15            | 658.25             | 0.454                          | 1185.01            | 538.27             |
| A_68_P26531866 | chr9:55389590-55389634                            | NM_027397:657            | Isl2          | INSIDE                 | 1.042                                                        | 0.426                          | 1586.97            | 675.72             | 0.444                          | 1169.56            | 518.71             |
| A_68_P26528578 | chr9:54798480-54798524                            | NM_011966:163            | Pisma4        | PROMOTER               | 1.042                                                        | 0.316                          | 1835.45            | 580.35             | 0.330                          | 1323.42            | 436.19             |
| A_68_P25994476 | chr8:81922795-81922839                            | NM_008539:551            | Smad1         | INSIDE                 | 1.042                                                        | 11.888                         | 2886.25            | 34312.40           | 12.384                         | 2821.65            | 34943.46           |
| A_68_P25279939 | chr7:90014474-90014518                            | NM_175366:1346           | Mex3b         | PROMOTER               | 1.042                                                        | 0.239                          | 3574.28            | 853.88             | 0.249                          | 2642.30            | 657.73             |
| A_68_P23649331 | chr5:44491778-44491823                            | NM_001163584:-5793       | Prom1         | PROMOTER               | 1.042                                                        | 0.205                          | 2695.96            | 553.11             | 0.214                          | 1948.82            | 416.61             |
| A_68_P23309920 | chr4:131604337-131604381                          | NM_001128606:635         | Epb4.1        | INSIDE                 | 1.042                                                        | 0.458                          | 2119.44            | 970.71             | 0.477                          | 1718.81            | 820.05             |
| A_68_P22185882 | chr3:61963377-61963421                            |                          |               | Unknown                | 1.042                                                        | 2.727                          | 756.70             | 2063.20            | 2.842                          | 646.26             | 1836.66            |
| A_68_P21113209 | chr2:31939133-31939177                            | NM_175511:71             | Fam78a        | INSIDE                 | 1.042                                                        | 1.597                          | 1657.26            | 2646.37            | 1.663                          | 1320.37            | 2195.95            |
| A_68_P20616239 | chr1:133423080-133423124                          | NM_001081011:836         |               | INSIDE                 | 1.042                                                        | 1.911                          | 1355.10            | 2590.15            | 1.991                          | 1007.07            | 2005.21            |
| A_68_P20578314 | chr1:125942313-125942357                          | NM_199021:-198           | Dpp10         | PROMOTER               | 1.042                                                        | 0.290                          | 1894.60            | 549.16             | 0.302                          | 1352.07            | 408.38             |
| A_68_P31108132 | chr17:26206355-26206399                           | NM_001162868:-254        | Rab11fip3     | PROMOTER               | 1.041                                                        | 1.924                          | 1489.33            | 2865.41            | 2.002                          | 1144.67            | 2291.53            |
| A_68_P31097571 | chr17:24615950-24615994                           | NM_019988:51             | Mrst8         | INSIDE                 | 1.041                                                        | 0.428                          | 1717.88            | 734.41             | 0.445                          | 1122.94            | 499.87             |
| A_68_P29477489 | chr14:26279042-26279086                           | NM_183208:394            | Zmiz1         | INSIDE                 | 1.041                                                        | 0.597                          | 1605.46            | 958.01             | 0.621                          | 1261.01            | 783.22             |
| A_68_P28774236 | chr12:118772882-118772926                         | NM_175930:17953          | Rapgef5       | INSIDE                 | 1.041                                                        | 1.743                          | 866.48             | 1510.28            | 1.815                          | 770.94             | 1399.33            |
| A_68_P28052461 | chr11:97605654-97605698                           | NM_054051:342            | Pip4k2b       | INSIDE                 | 1.041                                                        | 1.529                          | 5683.61            | 8691.52            | 1.592                          | 4906.11            | 7812.92            |
| A_68_P27903592 | chr11:70783452-70783496                           | NM_001083331:-10         | Nup88         | PROMOTER               | 1.041                                                        | 2.950                          | 367.83             | 1085.01            | 3.070                          | 293.93             | 902.23             |
| A_68_P27836981 | chr11:59263741-59263785                           | NM_001205068:216         | Jmjd4         | INSIDE                 | 1.041                                                        | 0.355                          | 2613.27            | 927.52             | 0.369                          | 1689.23            | 623.96             |
| A_68_P27282555 | chr10:79798362-79798406                           | NM_001204931:5495        | Reep6         | INSIDE                 | 1.041                                                        | 1.915                          | 4421.10            | 8466.80            | 1.994                          | 3044.94            | 6070.69            |
| A_68_P25542185 | chr7:140900700-140900744                          | NM_009479:256            | Uros          | INSIDE                 | 1.041                                                        | 0.476                          | 1068.94            | 509.24             | 0.496                          | 891.04             | 441.87             |
| A_68_P24864240 | chr6:134871160-134871204                          | NM_009875:764            | Cdkn1b        | INSIDE                 | 1.041                                                        | 2.260                          | 3547.91            | 8016.68            | 2.351                          | 2813.73            | 6615.26            |
| A_68_P24766250 | chr6:114593146-114593190                          | NM_028835:26             | Atg7          | INSIDE                 | 1.041                                                        | 0.416                          | 1359.39            | 565.72             | 0.433                          | 1139.62            | 493.67             |
| A_68_P23595118 | chr5:34916324-34916368                            | NM_001024458:-16         | Add1          | PROMOTER               | 1.041                                                        | 0.576                          | 2121.98            | 1222.89            | 0.600                          | 1416.83            | 850.33             |
| A_68_P23367600 | chr4:141640361-141640405                          | NM_145402:163            | Tmem51        | PROMOTER               | 1.041                                                        | 0.379                          | 2510.68            | 951.16             | 0.395                          | 1922.80            | 758.65             |
| A_68_P21812069 | chr2:163201531-163201575                          | NM_021566:22157          | Jph2          | INSIDE                 | 1.041                                                        | 2.619                          | 888.46             | 2326.95            | 2.728                          | 782.18             | 2133.55            |
| A_68_P30421911 | chr15:88721121-88721165                           | ENSMUST00000172019:63706 |               | INSIDE                 | 1.040                                                        | 0.425                          | 1515.89            | 643.78             | 0.442                          | 1265.94            | 559.20             |
| A_68_P28049001 | chr11:97012004-97012048                           | NM_198100:-1000          | Tbkbp1        | PROMOTER               | 1.040                                                        | 0.515                          | 2691.09            | 1385.05            | 0.535                          | 2051.48            | 1098.37            |
| A_68_P26161392 | chr8:112741955-112741999                          | NM_146215:117            | Ftsjd1        | INSIDE                 | 1.040                                                        | 0.344                          | 3226.83            | 1109.47            | 0.357                          | 2498.53            | 893.01             |
| A_68_P25776085 | chr8:35870933-35870977                            | NM_176933:291            | Dusp4         | INSIDE                 | 1.040                                                        | 0.447                          | 1080.98            | 483.08             | 0.465                          | 906.66             | 421.44             |
| A_68_P23692827 | chr5:52506449-52506493                            | AK076709:-2081           |               | PROMOTER               | 1.040                                                        | 0.258                          | 2295.15            | 593.14             | 0.269                          | 1790.88            | 481.43             |
| A_68_P23575215 | chr5:31191120-31191164                            | NM_174849:-82            | Agbl5         | PROMOTER               | 1.040                                                        | 3.708                          | 605.64             | 2245.76            | 3.857                          | 441.70             | 1703.68            |
| A_68_P23428418 | chr4:153386065-153386109                          | NM_201226:175            | Lrrc47        | INSIDE                 | 1.040                                                        | 5.105                          | 610.93             | 3118.70            | 5.307                          | 554.20             | 2941.08            |
| A_68_P22829977 | chr4:34136995-34137039                            | NM_026923:26             | Spaca1        | INSIDE                 | 1.040                                                        | 2.128                          | 819.28             | 1743.06            | 2.213                          | 720.10             | 1593.45            |
| A_68_P21840495 | chr2:168106873-168106917                          | ENSMUST00000109191:-262  |               | PROMOTER               | 1.040                                                        | 0.540                          | 2279.57            | 1229.86            | 0.561                          | 1787.55            | 1002.56            |
| A_68_P20012423 | chr1:6373229-6373273                              | NM_001195732:23839       | Fam150a       | INSIDE                 | 1.040                                                        | 3.623                          | 1031.14            | 3735.41            | 3.768                          | 903.42             | 3404.31            |
| A_68_P31620316 | chr18:35991443-35991487                           | NM_133687:1993           | Cxnc5         | INSIDE                 | 1.039                                                        | 1.904                          | 1281.20            | 2438.90            | 1.977                          | 931.65             | 1841.97            |
| A_68_P28748134 | chr12:113382997-113383048                         | NM_001097621:-1396       | Kif26a        | PROMOTER               | 1.039                                                        | 1.381                          | 8606.37            | 11884.26           | 1.435                          | 5015.70            | 7197.97            |
| A_68_P27365024 | chr10:94877896-94877941                           | NM_001168657:-1          | Socs2         | PROMOTER               | 1.039                                                        | 0.409                          | 3318.18            | 1357.71            | 0.425                          | 2172.92            | 923.69             |
| A_68_P26554632 | chr9:59504864-59504908                            | NM_011099:472            | Pkm2          | INSIDE                 | 1.039                                                        | 0.187                          | 5639.21            | 1052.71            | 0.194                          | 4118.33            | 799.11             |
| A_68_P24118746 | chr5:136438629-13643873                           | NM_001160366:11696       | Srerb4d       | INSIDE                 | 1.039                                                        | 0.403                          | 2718.81            | 1096.34            | 0.419                          | 2243.34            | 940.21             |
| A_68_P24008162 | chr5:115607960-115608004                          | NM_175403:203            | Mlec          | INSIDE                 | 1.039                                                        | 1.616                          | 4811.70            | 7773.73            | 1.679                          | 4410.25            | 7405.57            |
| A_68_P21495965 | chr2:105516343-105516387                          | NM_013627:-237           | Pax6          | DIVERGENT_PROMOTER     | 1.039                                                        | 2.327                          | 765.59             | 1781.78            | 2.419                          | 635.90             | 1538.33            |
| A_68_P32557243 | chrX:97015613-97015657                            | NM_001081283:-773        | Tmem28        | PROMOTER               | 1.038                                                        | 4.617                          | 558.37             | 2577.83            | 4.791                          | 641.94             | 3075.36            |
| A_68_P32241076 | chrX:7525138-7525182                              | NM_001130416:-145        | Hdac6         | PROMOTER               | 1.038                                                        | 2.205                          | 576.30             | 1270.55            | 2.287                          | 764.24             | 1748.10            |
| A_68_P31629941 | chr18:37926527-37926571                           | NM_033595:1315           | Pcdhga12      | INSIDE                 | 1.038                                                        | 2.106                          | 876.25             | 1845.60            | 2.187                          | 750.87             | 1642.13            |
| A_68_P29856055 | chr14:102039383-102039427                         | NM_001033132:284         | Commd6        | INSIDE                 | 1.038                                                        | 3.135                          | 2078.23            | 6514.56            | 3.253                          | 2067.54            | 6726.38            |
| A_68_P29518747 | chr14:33412582-33412626                           | NM_001001796:-508        | Prrxl1        | PROMOTER               | 1.038                                                        | 0.480                          | 1320.66            | 633.77             | 0.498                          | 891.96             | 444.43             |
| A_68_P28189611 | chr11:121121856-121121900                         | NM_001080932:578         | Foxk2         | INSIDE                 | 1.038                                                        | 0.448                          | 1176.37            | 527.15             | 0.465                          | 935.56             | 435.26             |
| A_68_P28159846 | chr11:116392786-116392830                         | NM_001172475:-416        | Sphk1         | PROMOTER               | 1.038                                                        | 0.299                          | 2501.99            | 748.72             | 0.311                          | 1801.25            | 559.75             |
| A_68_P26459756 | chr9:42924615-42924659                            | NM_001034863:17          | Tmem136       | INSIDE                 | 1.038                                                        | 2.213                          | 1096.79            | 2427.03            | 2.296                          | 811.79             | 1864.24            |
| A_68_P26345841 | chr9:20986277-20986321                            | NM_183408:16141          | Pde4a         | INSIDE                 | 1.038                                                        | 0.477                          | 1687.72            | 804.85             | 0.495                          | 1241.78            | 614.43             |
| A_68_P28528114 | chr8:46129885-46129933                            | NM_001081286-94347       | Fat1          | INSIDE                 | 1.038                                                        | 2.521                          | 386.40             | 974.14             | 2.618                          | 281.54             | 737.04             |
| A_68_P23293015 | chr4:128444743-128444787                          | NM_001009819:8263        | A3gal2        | INSIDE                 | 1.038                                                        | 1.851                          | 904.74             | 1674.96            | 1.922                          | 682.43             | 1311.36            |
| A_68_P30423732 | chr15:89011344-89011388                           | NM_138749:-148           | Ptxnb2        | PROMOTER               | 1.037                                                        | 0.131                          | 5159.29            | 674.79             | 0.136                          | 3196.00            | 433.46             |
| A_68_P29941246 | chr14:119254241-119254285                         | NM_001160099:91          | Cldn10        | INSIDE                 | 1.037                                                        | 0.453                          | 1610.04            | 728.76             | 0.469                          | 1256.77            | 589.66             |

| ProbeName      | Target position of probe on CpG island microarray | TargetID                | GeneSymbol               | CpG island Description | Ratio of relative methylation (TiO <sub>2</sub> -NP/Vehicle) | Sham group                     |                    |                    | TiO <sub>2</sub> -H group      |                    |                    |
|----------------|---------------------------------------------------|-------------------------|--------------------------|------------------------|--------------------------------------------------------------|--------------------------------|--------------------|--------------------|--------------------------------|--------------------|--------------------|
|                |                                                   |                         |                          |                        |                                                              | Relative methylation (Cy5/Cy3) | Cy3 signal (Input) | Cy5 signal (MeDIP) | Relative methylation (Cy5/Cy3) | Cy3 signal (Input) | Cy5 signal (MeDIP) |
| A_68_P28936499 | chr13:34169593-34169637                           | NM_009450:263           | Tubb2a                   | INSIDE                 | 1.037                                                        | 0.398                          | 3592.32            | 1428.02            | 0.412                          | 2779.76            | 1146.02            |
| A_68_P28727040 | chr12:109513867-109513911                         | NM_001159910:-261       | Ccdc85c                  | PROMOTER               | 1.037                                                        | 0.400                          | 2880.88            | 1152.89            | 0.415                          | 2033.99            | 843.91             |
| A_68_P27835482 | chr11:59022044-59022088                           | NM_024210:204           | 2310033P09Rik            | INSIDE                 | 1.037                                                        | 0.529                          | 1961.65            | 1037.09            | 0.548                          | 1495.40            | 819.92             |
| A_68_P27263123 | chr10:76077247-76077291                           | NM_146007:8881          | Col6a2                   | INSIDE                 | 1.037                                                        | 2.164                          | 1905.31            | 4122.37            | 2.243                          | 1593.12            | 3572.71            |
| A_68_P26584122 | chr9:64659329-64659373                            | NM_001162917:533        | Dennd4a                  | INSIDE                 | 1.037                                                        | 0.192                          | 4700.35            | 903.87             | 0.199                          | 3223.60            | 643.03             |
| A_68_P25958306 | chr8:74210008-74210052                            | NM_001190830-9749       | Jak3                     | INSIDE                 | 1.037                                                        | 0.432                          | 1177.83            | 509.07             | 0.448                          | 864.03             | 387.16             |
| A_68_P25501810 | chr7:133839074-133839118                          | NM_029420:201           | Slx1b                    | INSIDE                 | 1.037                                                        | 0.367                          | 2119.67            | 778.09             | 0.381                          | 1456.26            | 554.14             |
| A_68_P25022022 | chr7:29244663-29244707                            | NM_001141921:7428       | Lrfr1                    | INSIDE                 | 1.037                                                        | 2.642                          | 656.02             | 1732.96            | 2.739                          | 556.65             | 1524.83            |
| A_68_P24760554 | chr6:113574432-113574476                          | NM_009507:440           | Vhl                      | INSIDE                 | 1.037                                                        | 0.348                          | 2489.27            | 866.98             | 0.361                          | 1781.44            | 643.23             |
| A_68_P24054067 | chr5:123582167-123582211                          | NM_175092:450           | Rhof                     | INSIDE                 | 1.037                                                        | 0.385                          | 1813.90            | 698.21             | 0.399                          | 1228.65            | 490.38             |
| A_68_P24034095 | chr5:120132994-120133040                          | NM_011535:12339         | Tbx3                     | INSIDE                 | 1.037                                                        | 0.455                          | 1132.47            | 515.78             | 0.472                          | 825.07             | 389.64             |
| A_68_P22970879 | chr4:63156617-63156661                            | NM_001008791:347        | Whrn                     | INSIDE                 | 1.037                                                        | 0.463                          | 2663.96            | 1233.64            | 0.480                          | 2098.93            | 1008.31            |
| A_68_P21567191 | chr2:118798466-118798510                          | AK184532:45580          | chr2:118798466-118798510 | INSIDE                 | 1.037                                                        | 0.202                          | 2353.99            | 474.50             | 0.209                          | 1828.32            | 382.02             |
| A_68_P21212082 | chr2:51003647-51003691                            | NM_028810:963           | Rnd3                     | INSIDE                 | 1.037                                                        | 0.571                          | 1548.53            | 884.90             | 0.593                          | 1181.94            | 700.72             |
| A_68_P20254931 | chr1:57831531-57831575                            | NM_144882:-152          | Spats2l                  | PROMOTER               | 1.037                                                        | 0.168                          | 3201.53            | 539.01             | 0.175                          | 2343.07            | 409.17             |
| A_68_P20148454 | chr1:36528308-36528352                            | NM_033570:-111          | Cnmn4                    | PROMOTER               | 1.037                                                        | 0.521                          | 1371.41            | 714.09             | 0.540                          | 1112.17            | 600.24             |
| A_68_P20002770 | chr1:3661760-3661804                              | NM_001011874:-203       | Xkr4                     | PROMOTER               | 1.037                                                        | 2.083                          | 697.37             | 1452.81            | 2.160                          | 636.31             | 1374.40            |
| A_68_P31614612 | chr18:34936814-34936858                           | NM_001081256:175        | Kdm3b                    | INSIDE                 | 1.036                                                        | 0.508                          | 2024.26            | 1028.61            | 0.526                          | 1580.21            | 831.55             |
| A_68_P30939710 | chr16:87432281-87432325                           | NM_001081068:549        | Ltn1                     | INSIDE                 | 1.036                                                        | 0.356                          | 1728.32            | 615.59             | 0.369                          | 1280.77            | 472.44             |
| A_68_P30555518 | chr16:13109717-13109761                           | NM_015769:-90           | Ercc4                    | PROMOTER               | 1.036                                                        | 0.448                          | 1709.42            | 766.53             | 0.465                          | 1267.93            | 589.22             |
| A_68_P29480405 | chr14:26722370-26722414                           | NM_207229:-13           | Plac9                    | PROMOTER               | 1.036                                                        | 0.500                          | 5162.90            | 2583.50            | 0.519                          | 3767.47            | 1953.46            |
| A_68_P28873009 | chr13:21560180-21560224                           | NM_025719:168           | Nkapl                    | INSIDE                 | 1.036                                                        | 1.741                          | 716.81             | 1247.90            | 1.803                          | 576.50             | 1039.40            |
| A_68_P27998250 | chr1:87983215-87983259                            | NM_001172099:170        | Cuedc1                   | INSIDE                 | 1.036                                                        | 1.663                          | 778.34             | 1294.52            | 1.724                          | 599.76             | 1033.81            |
| A_68_P27804720 | chr11:53244141-53244185                           | NM_025352:171           | Uqcrq                    | INSIDE                 | 1.036                                                        | 0.406                          | 2258.57            | 917.44             | 0.421                          | 1701.75            | 715.90             |
| A_68_P27278712 | chr10:79218062-79218106                           | NM_023304:221           | Fgf22                    | INSIDE                 | 1.036                                                        | 0.533                          | 1869.30            | 997.12             | 0.553                          | 1360.84            | 751.95             |
| A_68_P26864772 | chr9:118059149-118059193                          | NM_026442:144           | Cmc1                     | INSIDE                 | 1.036                                                        | 1.618                          | 1004.10            | 1624.77            | 1.677                          | 788.94             | 1322.78            |
| A_68_P25193392 | chr7:74517038-74517082                            | NM_001033713:684        | Me12a                    | INSIDE                 | 1.036                                                        | 0.440                          | 1332.74            | 586.28             | 0.456                          | 1029.70            | 469.39             |
| A_68_P24761384 | chr6:113709003-113709047                          | NM_001036684:132346     | Atp2b2                   | INSIDE                 | 1.036                                                        | 1.952                          | 540.94             | 1055.85            | 2.022                          | 479.06             | 968.76             |
| A_68_P24760450 | chr6:113555022-113555066                          | NM_133937:279           | 6720456B07Rik            | INSIDE                 | 1.036                                                        | 0.440                          | 3599.96            | 1583.62            | 0.456                          | 2853.55            | 1300.84            |
| A_68_P23281395 | chr4:126355065-126355109                          | NM_011970:200           | Psmb2                    | INSIDE                 | 1.036                                                        | 2.763                          | 527.29             | 1456.78            | 2.864                          | 382.06             | 1094.05            |
| A_68_P23193626 | chr4:107596160-107596204                          | NM_009949:12            | Cpt2                     | INSIDE                 | 1.036                                                        | 0.394                          | 1673.98            | 659.74             | 0.408                          | 1334.17            | 544.59             |
| A_68_P22083009 | chr3:40887619-40887663                            | NM_027558:-672          | Pgrmc2                   | PROMOTER               | 1.036                                                        | 0.350                          | 1512.75            | 529.43             | 0.362                          | 1211.09            | 438.95             |
| A_68_P20632581 | chr1:136195963-136196007                          | NM_001144855:33521      | Ppfia4                   | INSIDE                 | 1.036                                                        | 0.413                          | 2514.70            | 1038.08            | 0.428                          | 1837.58            | 785.76             |
| A_68_P20353638 | chr1:75379009-75379053                            | NM_001085370:-3154      | Spep                     | PROMOTER               | 1.036                                                        | 0.109                          | 7599.68            | 830.71             | 0.113                          | 5124.85            | 580.24             |
| A_68_P31100484 | chr17:25073844-25073888                           | NM_001163447:56         | Mapk8ip3                 | INSIDE                 | 1.035                                                        | 1.870                          | 998.21             | 1866.56            | 1.936                          | 839.48             | 1625.31            |
| A_68_P30991292 | chr16:96367120-96367164                           | NM_207301:117           | Wrb                      | INSIDE                 | 1.035                                                        | 0.158                          | 2958.72            | 468.66             | 0.164                          | 2172.61            | 356.19             |
| A_68_P30490488 | chr15:101062388-101062432                         | NM_019518:7773          | Grasp                    | INSIDE                 | 1.035                                                        | 1.851                          | 1151.13            | 2130.27            | 1.915                          | 976.10             | 1869.11            |
| A_68_P30126795 | chr15:34012330-34012374                           | NM_026002:-121          | Mtdh                     | PROMOTER               | 1.035                                                        | 0.180                          | 3569.56            | 641.53             | 0.186                          | 2378.74            | 442.55             |
| A_68_P30013961 | chr15:10966774-10966818                           | NM_178717:927           | Rxfp3                    | INSIDE                 | 1.035                                                        | 0.115                          | 4582.66            | 526.30             | 0.119                          | 3088.07            | 367.12             |
| A_68_P29731239 | chr14:76410408-76410452                           | NM_026816:242           | Gtf2f2                   | INSIDE                 | 1.035                                                        | 0.514                          | 2941.39            | 1512.27            | 0.532                          | 2101.44            | 1118.72            |
| A_68_P28072252 | chr11:101017412-101017456                         | NM_134028:237           | Tubg2                    | INSIDE                 | 1.035                                                        | 0.257                          | 1988.59            | 510.42             | 0.266                          | 1532.35            | 406.97             |
| A_68_P26232969 | chr8:124900303-124900347                          | NM_001029993:-191       | Zc3h18                   | PROMOTER               | 1.035                                                        | 0.357                          | 1450.80            | 517.68             | 0.369                          | 1208.30            | 446.31             |
| A_68_P25728859 | chr8:26864375-26864419                            | NM_028102:356           | Ddhd2                    | INSIDE                 | 1.035                                                        | 0.328                          | 3594.41            | 1179.04            | 0.339                          | 2338.61            | 793.70             |
| A_68_P24171029 | chr5:147774986-147775030                          | NM_029581:342           | Mtif3                    | INSIDE                 | 1.035                                                        | 0.415                          | 5639.67            | 2337.86            | 0.429                          | 3778.15            | 1621.43            |
| A_68_P23279121 | chr4:125939746-125939790                          | NM_013718:120           | Trappc3                  | INSIDE                 | 1.035                                                        | 0.114                          | 5193.90            | 590.87             | 0.118                          | 3492.70            | 411.11             |
| A_68_P22782196 | chr4:23446473-23446517                            | ENSMUST00000118402:-907 |                          | PROMOTER               | 1.035                                                        | 1.565                          | 1868.30            | 2924.19            | 1.620                          | 1557.25            | 2522.66            |
| A_68_P21310282 | chr2:69485168-69485213                            | NM_028284:-121          | Bbs5                     | PROMOTER               | 1.035                                                        | 0.428                          | 1277.13            | 546.39             | 0.443                          | 990.62             | 438.66             |
| A_68_P21099288 | chr2:29607027-29607071                            | NM_001177392:-9999      | Gml3547                  | PROMOTER               | 1.035                                                        | 0.458                          | 3149.74            | 1441.86            | 0.474                          | 2312.68            | 1095.21            |
| A_68_P32361702 | chrX:45245496-45245540                            | NM_053123:211           | Smarca1                  | INSIDE                 | 1.034                                                        | 1.714                          | 414.91             | 711.17             | 1.773                          | 521.17             | 924.07             |
| A_68_P32186048 | chr19:54119950-54119994                           | NM_007417:301           | Adra2a                   | INSIDE                 | 1.034                                                        | 2.244                          | 1192.33            | 2675.42            | 2.320                          | 1119.19            | 2596.55            |
| A_68_P30575784 | chr16:17803544-17803588                           | NM_153790:6192          | Sscar2                   | INSIDE                 | 1.034                                                        | 1.805                          | 1267.53            | 2288.07            | 1.866                          | 1019.68            | 1902.39            |
| A_68_P30572652 | chr16:17233443-17233487                           | NM_178922:-215          | Hic2                     | PROMOTER               | 1.034                                                        | 0.179                          | 3033.93            | 541.59             | 0.185                          | 2336.85            | 431.48             |
| A_68_P29639452 | chr14:60216844-60216888                           | NM_001168535:-70        | Cdadc1                   | PROMOTER               | 1.034                                                        | 11.101                         | 4014.43            | 44565.27           | 11.484                         | 4101.86            | 47105.30           |
| A_68_P28727030 | chr12:109512594-109512638                         | NM_001159910:1011       | Ccdc85c                  | INSIDE                 | 1.034                                                        | 0.409                          | 1604.62            | 656.13             | 0.423                          | 1274.49            | 539.00             |
| A_68_P27780099 | chr11:48630768-48630812                           | NM_145377:103           | Trim14                   | INSIDE                 | 1.034                                                        | 0.649                          | 2433.25            | 1578.92            | 0.671                          | 1957.22            | 1312.86            |
| A_68_P27284099 | chr10:80039952-80039996                           | NM_078477:67            | Klfl6                    | INSIDE                 | 1.034                                                        | 1.421                          | 2914.08            | 4140.90            | 1.469                          | 2062.19            | 3028.85            |
| A_68_P26134883 | chr8:108138370-108138414                          | NR_035492:-973          | Mir1966                  | PROMOTER               | 1.034                                                        | 1.814                          | 1235.10            | 2240.62            | 1.876                          | 1010.65            | 1895.79            |
| A_68_P25953303 | chr8:73197017-73197061                            | NM_015816:-91           | Lsm4                     | PROMOTER               | 1.034                                                        | 0.230                          | 3171.91            | 728.29             | 0.237                          | 2294.07            | 544.54             |
| A_68_P25269627 | chr7:88137961-88138005                            | NM_178707:-587          | Zfp592                   | PROMOTER               | 1.034                                                        | 0.280                          | 2023.04            | 565.89             | 0.289                          | 1484.13            | 429.31             |
| A_68_P25266320 | chr7:87515606-87515650                            | NM_172903:633           | Man2a2                   | INSIDE                 | 1.034                                                        | 0.453                          | 1982.70            | 897.70             | 0.468                          | 1626.52            | 761.64             |
| A_68_P24785567 | chr6:118147310-118147354                          | NM_001080780:430        | Ret                      | INSIDE                 | 1.034                                                        | 0.498                          | 1116.74            | 555.76             | 0.514                          | 849.18             | 436.82             |
| A_68_P24162427 | chr5:145522348-145522392                          | NM_177735:77            | Tmem130                  | INSIDE                 | 1.034                                                        | 0.355                          | 1811.20            | 643.52             | 0.367                          | 1433.43            | 526.77             |
| A_68_P23442481 | chr4:155484106-155484150                          | NM_145557:22            | 9430015G10Rik            | INSIDE                 | 1.034                                                        | 0.350                          | 2027.36            | 710.53             | 0.363                          | 1845.36            | 668.98             |
| A_68_P22569283 | chr3:138189837-138189881                          | NM_007917:704           | Eir4e                    | INSIDE                 | 1.034                                                        | 2.218                          | 503.67             | 1117.02            | 2.293                          | 416.35             | 954.67             |
| A_68_P21710705 | chr2:144993065-144993109                          | ENSMUST00000110007:-403 |                          | PROMOTER               | 1.034                                                        | 0.451                          | 1781.35            | 803.93             | 0.467                          | 1443.20            | 673.26             |

| ProbeName      | Target position of probe on CpG island microarray | TargetID                 | GeneSymbol    | CpG island Description | Ratio of relative methylation (TiO <sub>2</sub> -NP/Vehicle) | Sham group                     |                    |                    | TiO <sub>2</sub> -H group      |                    |                    |
|----------------|---------------------------------------------------|--------------------------|---------------|------------------------|--------------------------------------------------------------|--------------------------------|--------------------|--------------------|--------------------------------|--------------------|--------------------|
|                |                                                   |                          |               |                        |                                                              | Relative methylation (Cy5/Cy3) | Cy3 signal (Input) | Cy5 signal (MeDIP) | Relative methylation (Cy5/Cy3) | Cy3 signal (Input) | Cy5 signal (MeDIP) |
| A_68_P30728925 | chr16:45844534-45844578                           | NM_153412:-65            | Phldb2        | PROMOTER               | 1.033                                                        | 2.409                          | 1505.83            | 3627.07            | 2.488                          | 1386.70            | 3450.64            |
| A_68_P29629464 | chr14:58318596-58318640                           | NM_015771:46342          | Lats2         | INSIDE                 | 1.033                                                        | 5.274                          | 1222.25            | 6445.74            | 5.447                          | 981.44             | 5345.64            |
| A_68_P26815429 | chr9:108462952-108462996                          | NM_011830:143            | Impdh2        | INSIDE                 | 1.033                                                        | 0.492                          | 3541.49            | 1743.29            | 0.508                          | 2669.11            | 1357.22            |
| A_68_P25025267 | chr7:29871114-29871158                            | NR_035489:-2423          | Mir1963       | PROMOTER               | 1.033                                                        | 3.080                          | 917.27             | 2825.48            | 3.182                          | 772.53             | 2458.15            |
| A_68_P24993672 | chr7:20094110-20094154                            | NM_025960:55             | Trappc6a      | INSIDE                 | 1.033                                                        | 0.430                          | 1566.85            | 673.14             | 0.444                          | 1244.10            | 552.20             |
| A_68_P24974267 | chr7:13620185-13620229                            | NM_026885:-80            | Chmp2a        | PROMOTER               | 1.033                                                        | 0.352                          | 2964.23            | 1042.65            | 0.363                          | 2054.39            | 746.52             |
| A_68_P23819789 | chr5:77524030-77524074                            | NM_001159900:240         | Hopx          | INSIDE                 | 1.033                                                        | 0.418                          | 2065.79            | 863.04             | 0.431                          | 1523.37            | 657.33             |
| A_68_P22888054 | chr4:46318111-46318155                            | ENSMUST00000123933:38171 |               | INSIDE                 | 1.033                                                        | 4.181                          | 1016.54            | 4250.65            | 4.318                          | 1116.10            | 4819.18            |
| A_68_P32581184 | chrX:102959900-102959944                          | NM_030614:107            | Fgf16         | INSIDE                 | 1.032                                                        | 1.785                          | 689.59             | 1231.23            | 1.843                          | 804.19             | 1482.48            |
| A_68_P32226998 | chr19:60832450-60832494                           | NM_178421:583            | Nanos1        | INSIDE                 | 1.032                                                        | 0.533                          | 1895.38            | 1010.01            | 0.550                          | 1625.09            | 894.11             |
| A_68_P31713386 | chr18:53624258-53624302                           | NM_001033281:81          | Prdm6         | INSIDE                 | 1.032                                                        | 0.211                          | 2698.41            | 570.66             | 0.218                          | 1952.61            | 425.98             |
| A_68_P28997657 | chr13:44826068-44826112                           | NM_001205044:-52         | Jarid2        | PROMOTER               | 1.032                                                        | 2.538                          | 3046.29            | 7730.32            | 2.619                          | 2333.94            | 6111.85            |
| A_68_P28730245 | chr12:110074392-110074436                         | NM_181328:-328           | Slc25a29      | DIVERGENT_PROMOTER     | 1.032                                                        | 0.438                          | 1393.98            | 609.93             | 0.451                          | 1060.88            | 478.99             |
| A_68_P28514077 | chr12:70457809-70457853                           | NM_025441:323            | Nemf          | INSIDE                 | 1.032                                                        | 0.566                          | 1429.31            | 809.52             | 0.584                          | 1243.43            | 726.75             |
| A_68_P27994973 | chr11:87405603-87405647                           | NM_133215:-94            | Mtnr4         | PROMOTER               | 1.032                                                        | 0.638                          | 4679.27            | 2986.55            | 0.659                          | 3118.92            | 2054.33            |
| A_68_P27792933 | chr11:51076801-51076845                           | NM_007714:150            | Clk4          | INSIDE                 | 1.032                                                        | 0.578                          | 2038.27            | 1178.68            | 0.597                          | 1526.99            | 911.52             |
| A_68_P25836146 | chr8:47556498-47556542                            | NM_007981:125            | Acs11         | INSIDE                 | 1.032                                                        | 2.050                          | 937.87             | 1922.53            | 2.115                          | 821.37             | 1737.40            |
| A_68_P23591182 | chr5:34125290-34125334                            | NM_019694:41             | Letm1         | INSIDE                 | 1.032                                                        | 0.455                          | 1423.50            | 647.33             | 0.469                          | 1100.32            | 516.15             |
| A_68_P22630571 | chr3:148652293-148652337                          | ENSMUST00000098518:-34   |               | PROMOTER               | 1.032                                                        | 0.400                          | 2602.06            | 1040.17            | 0.413                          | 1975.40            | 814.99             |
| A_68_P22523145 | chr3:129672979-129673023                          | NM_025779:124            | Ccdc109b      | INSIDE                 | 1.032                                                        | 2.106                          | 861.46             | 1814.49            | 2.174                          | 694.96             | 1510.95            |
| A_68_P22378553 | chr3:101816844-101816888                          | NM_178777:2799           | Nhlh2         | INSIDE                 | 1.032                                                        | 0.273                          | 3069.80            | 836.80             | 0.281                          | 2294.20            | 645.56             |
| A_68_P21147672 | chr2:38210172-38210216                            | NM_010710:367            | Lhx2          | INSIDE                 | 1.032                                                        | 1.812                          | 800.81             | 1450.92            | 1.870                          | 624.95             | 1168.65            |
| A_68_P20910365 | chr1:188791961-188792005                          | NM_033077:688            | D1Pas1        | INSIDE                 | 1.032                                                        | 3.183                          | 1231.21            | 3918.95            | 3.285                          | 1014.09            | 3330.95            |
| A_68_P20158329 | chr1:38267215-38267259                            | NM_010678:454564         | Aif3          | INSIDE                 | 1.032                                                        | 0.463                          | 2213.08            | 1025.44            | 0.478                          | 1871.72            | 894.60             |
| A_68_P32131186 | chr19:44322737-44322781                           | NM_024450:44981          | Scd3          | DOWNSTREAM             | 1.031                                                        | 0.534                          | 1718.99            | 918.77             | 0.551                          | 1288.03            | 709.70             |
| A_68_P31958230 | chr19:11943487-11943531                           | NM_001011775:2196        | Olf11419      | DOWNSTREAM             | 1.031                                                        | 2.747                          | 946.70             | 2600.86            | 2.832                          | 864.91             | 2449.17            |
| A_68_P30351004 | chr15:76709899-76709943                           | NM_145916:215            | Zfp7          | INSIDE                 | 1.031                                                        | 0.425                          | 1121.85            | 477.20             | 0.438                          | 899.92             | 394.52             |
| A_68_P28514076 | chr12:70457722-70457766                           | NM_025441:409            | Nemf          | INSIDE                 | 1.031                                                        | 0.582                          | 2106.95            | 1226.20            | 0.600                          | 1553.07            | 931.82             |
| A_68_P28155819 | chr11:115719918-115719962                         | NM_145438:34569          | Lig2          | DOWNSTREAM             | 1.031                                                        | 0.579                          | 3439.97            | 1991.94            | 0.597                          | 2390.14            | 1426.67            |
| A_68_P27262525 | chr10:75994355-75994399                           | NM_146006:5              | Lss           | INSIDE                 | 1.031                                                        | 1.556                          | 1138.49            | 1771.27            | 1.604                          | 950.21             | 1523.66            |
| A_68_P24605100 | chr6:85401853-85401897                            | NR_028081:90             | 1700040103Rik | INSIDE                 | 1.031                                                        | 0.636                          | 3396.56            | 2160.97            | 0.656                          | 2468.67            | 1619.66            |
| A_68_P24438776 | chr6:50516749-50516793                            | NR_015581:129            | 5430402013Rik | INSIDE                 | 1.031                                                        | 1.908                          | 1519.12            | 2897.93            | 1.966                          | 1270.26            | 2497.87            |
| A_68_P24099182 | chr5:132092432-132092476                          | NM_177047:925759         | Aut2          | INSIDE                 | 1.031                                                        | 0.407                          | 1985.16            | 808.12             | 0.420                          | 1473.61            | 618.66             |
| A_68_P23251106 | chr4:120078426-120078470                          | NM_001159630:563         | Scmh1         | INSIDE                 | 1.031                                                        | 0.239                          | 2043.67            | 487.57             | 0.246                          | 1595.42            | 392.33             |
| A_68_P23111977 | chr4:93002257-93002301                            | NM_026954:-76            | Tusc1         | PROMOTER               | 1.031                                                        | 0.450                          | 2128.74            | 957.21             | 0.463                          | 1748.51            | 1010.37            |
| A_68_P22317891 | chr3:89018021-89018065                            | NM_001161824:215         | Mtx1          | INSIDE                 | 1.031                                                        | 3.079                          | 1543.54            | 4752.70            | 3.175                          | 1123.49            | 3566.62            |
| A_68_P21040932 | chr2:18616488-18616532                            | NM_001001334:-4138       | BC061194      | PROMOTER               | 1.031                                                        | 0.366                          | 1630.88            | 597.58             | 0.378                          | 1377.36            | 520.31             |
| A_68_P20391651 | chr1:82280179-82280223                            | NM_010570:7814           | Irs1          | INSIDE                 | 1.031                                                        | 0.357                          | 5378.75            | 1917.79            | 0.368                          | 3838.87            | 1411.69            |
| A_68_P31929504 | chr19:5568132-5568176                             | NM_001033448:81          | Gm962         | INSIDE                 | 1.030                                                        | 0.358                          | 1728.08            | 619.01             | 0.369                          | 1300.88            | 480.10             |
| A_68_P30670706 | chr16:35542029-35542073                           | NM_013661:603            | Sema5b        | INSIDE                 | 1.030                                                        | 0.161                          | 10699.30           | 1718.03            | 0.165                          | 7448.00            | 1231.83            |
| A_68_P30596852 | chr16:22265731-22265775                           | NM_009186:250            | Tra2b         | INSIDE                 | 1.030                                                        | 0.644                          | 2295.50            | 1478.80            | 0.663                          | 1698.64            | 1126.93            |
| A_68_P30575402 | chr16:17734359-17734403                           |                          | Unknown       |                        | 1.030                                                        | 2.449                          | 568.09             | 1391.42            | 2.522                          | 464.49             | 1171.26            |
| A_68_P30363894 | chr15:78858490-78858534                           | NM_008197:-129           | H1f0          | PROMOTER               | 1.030                                                        | 2.092                          | 374.28             | 783.07             | 2.155                          | 327.40             | 705.41             |
| A_68_P28671225 | chr12:99866511-99866555                           | NM_178914:139            | Spata7        | INSIDE                 | 1.030                                                        | 0.441                          | 2007.29            | 885.40             | 0.454                          | 1515.56            | 688.25             |
| A_68_P28183237 | chr11:120096983-120097028                         | NM_198423:2745           | Bahcc1        | INSIDE                 | 1.030                                                        | 3.308                          | 266.07             | 880.09             | 3.409                          | 185.71             | 633.01             |
| A_68_P28118513 | chr11:109287169-109287213                         | NM_025275:-69            | Amz2          | PROMOTER               | 1.030                                                        | 3.563                          | 13418.68           | 47814.56           | 3.671                          | 9061.71            | 33261.51           |
| A_68_P27284471 | chr10:80097175-80097221                           | NM_001159591:4798        | Csnk1g2       | INSIDE                 | 1.030                                                        | 8.171                          | 205.68             | 1680.61            | 8.414                          | 181.01             | 1522.97            |
| A_68_P26783903 | chr9:103014881-103014925                          | NM_173781:499            | Rab6b         | INSIDE                 | 1.030                                                        | 0.404                          | 2085.25            | 841.42             | 0.416                          | 1707.17            | 709.60             |
| A_68_P26016157 | chr8:86239183-86239227                            | NM_197982:129            | Ddx39         | INSIDE                 | 1.030                                                        | 0.301                          | 2433.19            | 732.23             | 0.310                          | 1947.18            | 603.45             |
| A_68_P25890523 | chr8:59800718-59800762                            | NM_010402:961            | Hand2         | INSIDE                 | 1.030                                                        | 0.517                          | 1661.75            | 859.33             | 0.533                          | 1323.46            | 705.19             |
| A_68_P24951683 | chr7:4983086-4983130                              | NM_001033383:11131       | Zfp865        | INSIDE                 | 1.030                                                        | 2.923                          | 1092.52            | 3193.90            | 3.010                          | 866.67             | 2608.55            |
| A_68_P24795433 | chr6:119798523-119798567                          | NR_030776:334            | 3110021A11Rik | INSIDE                 | 1.030                                                        | 0.436                          | 1708.19            | 745.56             | 0.449                          | 1354.74            | 608.90             |
| A_68_P24112564 | chr5:134789737-134789781                          | NM_001080746:858         | Gtf2i         | INSIDE                 | 1.030                                                        | 0.364                          | 2208.07            | 804.45             | 0.375                          | 1929.98            | 724.21             |
| A_68_P23297032 | chr4:129190684-129190728                          | NM_010807:-118           | Marcks11      | PROMOTER               | 1.030                                                        | 0.489                          | 1761.12            | 860.39             | 0.503                          | 1095.99            | 551.77             |
| A_68_P23198686 | chr4:108673421-108673465                          | NM_146150:33             | Nrd1          | INSIDE                 | 1.030                                                        | 0.211                          | 3292.36            | 693.38             | 0.217                          | 2528.38            | 548.66             |
| A_68_P22661983 | chr3:153991849-153991908                          | NM_010713:1646           | Lhx8          | INSIDE                 | 1.030                                                        | 2.124                          | 1562.26            | 3318.85            | 2.188                          | 1150.10            | 2516.19            |
| A_68_P22169031 | chr3:58381260-58381314                            | NM_001040396:707         | 2810407C02Rik | INSIDE                 | 1.030                                                        | 1.957                          | 598.31             | 1171.07            | 2.017                          | 458.13             | 924.00             |
| A_68_P20897124 | chr1:186551680-186551724                          | NM_008250:4670           | Hlx           | INSIDE                 | 1.030                                                        | 0.405                          | 1126.64            | 456.82             | 0.418                          | 949.18             | 396.29             |
| A_68_P32078821 | chr19:34266845-34266890                           | NM_029682:108            | Stampl1       | INSIDE                 | 1.029                                                        | 0.183                          | 2606.94            | 477.46             | 0.188                          | 1705.73            | 321.49             |
| A_68_P32020401 | chr19:23968179-23968223                           | NM_177034:134835         | Apba1         | INSIDE                 | 1.029                                                        | 2.270                          | 1256.51            | 2852.23            | 2.335                          | 1093.22            | 2552.56            |
| A_68_P30580616 | chr16:18588788-18588832                           | NM_011532:-1748          | Tbx1          | PROMOTER               | 1.029                                                        | 0.345                          | 1929.75            | 666.65             | 0.355                          | 1380.27            | 490.44             |
| A_68_P30287849 | chr15:65618481-65618525                           | NM_133766:-100           | Efr3a         | PROMOTER               | 1.029                                                        | 2.027                          | 432.69             | 876.95             | 2.086                          | 428.61             | 893.98             |
| A_68_P29952573 | chr14:121310169-121310213                         | NM_023579:-225           | Ipo5          | PROMOTER               | 1.029                                                        | 0.465                          | 1095.29            | 509.26             | 0.479                          | 906.03             | 433.61             |
| A_68_P29713887 | chr14:73109166-73109210                           | NM_207636:622            | Fndc3a        | INSIDE                 | 1.029                                                        | 2.236                          | 579.20             | 1295.37            | 2.302                          | 344.29             | 792.64             |
| A_68_P28788254 | chr13:3477478-3477522                             | NR_015522:-48            | 2810429104Rik | PROMOTER               | 1.029                                                        | 0.260                          | 3996.23            | 1038.29            | 0.267                          | 2960.82            | 791.43             |

| ProbeName      | Target position of probe on CpG island microarray | TargetID                | GeneSymbol    | CpG island Description | Ratio of relative methylation (TiO <sub>2</sub> -NP/Vehicle) | Sham group                     |                    |                    | TiO <sub>2</sub> -H group      |                    |                    |
|----------------|---------------------------------------------------|-------------------------|---------------|------------------------|--------------------------------------------------------------|--------------------------------|--------------------|--------------------|--------------------------------|--------------------|--------------------|
|                |                                                   |                         |               |                        |                                                              | Relative methylation (Cy5/Cy3) | Cy3 signal (Input) | Cy5 signal (MeDIP) | Relative methylation (Cy5/Cy3) | Cy3 signal (Input) | Cy5 signal (MeDIP) |
| A_68_P27949795 | chr11:79404844-79404888                           | NM_175543:153           | Rab11fip4     | INSIDE                 | 1.029                                                        | 2.192                          | 721.09             | 1580.88            | 2.255                          | 593.34             | 1338.04            |
| A_68_P26544598 | chr9:57787782-57787826                            | NM_011352:137           | Sema7a        | PROMOTER               | 1.029                                                        | 0.445                          | 1863.88            | 829.98             | 0.458                          | 1396.97            | 639.91             |
| A_68_P26465225 | chr9:43828528-43828572                            |                         | Unknown       | Unknown                | 1.029                                                        | 4.102                          | 515.24             | 2113.60            | 4.221                          | 351.07             | 1481.71            |
| A_68_P25713873 | chr8:24085890-24085934                            | NM_001110783:559        | Ank1          | INSIDE                 | 1.029                                                        | 1.731                          | 1167.84            | 2021.41            | 1.782                          | 862.93             | 1537.64            |
| A_68_P25412180 | chr7:117365261-117365305                          | NM_009302:66            | Swap70        | INSIDE                 | 1.029                                                        | 4.651                          | 1084.73            | 5045.24            | 4.784                          | 1054.36            | 5044.14            |
| A_68_P25029776 | chr7:30857858-30857902                            | NM_177889:38            | Zfp82         | PROMOTER               | 1.029                                                        | 1.711                          | 1040.31            | 1780.03            | 1.761                          | 809.71             | 1425.56            |
| A_68_P24344492 | chr6:32537469-32537513                            | NM_175750:702           | Plxna4        | INSIDE                 | 1.029                                                        | 0.544                          | 2041.61            | 1111.42            | 0.560                          | 1410.16            | 790.16             |
| A_68_P24116584 | chr5:135965213-135965257                          | NM_146001:55758         | Hip1          | INSIDE                 | 1.029                                                        | 0.460                          | 1084.58            | 498.95             | 0.473                          | 988.06             | 467.56             |
| A_68_P23873914 | chr5:89194174-89194218                            | NM_007832:159           | Dck           | INSIDE                 | 1.029                                                        | 0.345                          | 2674.42            | 923.24             | 0.355                          | 2175.61            | 772.65             |
| A_68_P20086661 | chr1:23108998-23109042                            | NM_025746:72            | 4933415F23Rik | INSIDE                 | 1.029                                                        | 1.839                          | 646.44             | 1188.80            | 1.893                          | 558.38             | 1056.77            |
| A_68_P31759408 | chr18:61885774-61885818                           | NM_021296:189           | Grpel2        | INSIDE                 | 1.028                                                        | 0.615                          | 1846.22            | 1135.06            | 0.632                          | 1429.94            | 903.43             |
| A_68_P31622949 | chr18:36440408-36440452                           | NM_008989:385           | Pura          | PROMOTER               | 1.028                                                        | 1.446                          | 1410.30            | 2039.54            | 1.487                          | 1114.08            | 1656.92            |
| A_68_P29258371 | chr13:99342954-99342998                           | AK135687:152841         |               | INSIDE                 | 1.028                                                        | 0.490                          | 1104.87            | 541.81             | 0.504                          | 1040.10            | 524.17             |
| A_68_P29059426 | chr13:56236410-56236454                           | NM_001159513:479        | H2afy         | INSIDE                 | 1.028                                                        | 2.005                          | 939.00             | 1882.42            | 2.061                          | 715.18             | 1473.91            |
| A_68_P29011719 | chr13:47201171-47201215                           | NM_025900:397           | Dek           | INSIDE                 | 1.028                                                        | 1.754                          | 1080.45            | 1894.80            | 1.804                          | 869.50             | 1568.25            |
| A_68_P27927584 | chr11:75493253-75493297                           | NM_133656:463           | Crk           | INSIDE                 | 1.028                                                        | 0.327                          | 3034.17            | 990.70             | 0.336                          | 2279.47            | 764.91             |
| A_68_P27308087 | chr10:84849473-84849517                           | NM_028709:64            | Btbd11        | PROMOTER               | 1.028                                                        | 0.441                          | 2454.27            | 1081.49            | 0.453                          | 1978.33            | 896.12             |
| A_68_P26313303 | chr9:13553960-13554004                            | NM_023858:358           | Mtmr2         | INSIDE                 | 1.028                                                        | 0.456                          | 1301.11            | 592.73             | 0.468                          | 1103.60            | 516.81             |
| A_68_P26136632 | chr8:108424612-108424656                          | NM_173432:261           | Pskh1         | INSIDE                 | 1.028                                                        | 0.560                          | 2046.90            | 1146.99            | 0.576                          | 1555.53            | 896.16             |
| A_68_P25962573 | chr8:75247186-75247230                            | NM_001113248:22         | Sin3b         | INSIDE                 | 1.028                                                        | 0.240                          | 3951.47            | 947.90             | 0.247                          | 2925.02            | 721.50             |
| A_68_P25956924 | chr8:73987733-73987777                            | NM_022419:198           | Abhd8         | DIVERGENT_PROMOTER     | 1.028                                                        | 0.155                          | 3741.18            | 580.69             | 0.160                          | 2673.09            | 426.56             |
| A_68_P25349937 | chr7:104480730-104480774                          | NM_001039039:80         | Kctd21        | DIVERGENT_PROMOTER     | 1.028                                                        | 1.689                          | 1000.12            | 1689.70            | 1.736                          | 845.40             | 1467.98            |
| A_68_P24112562 | chr5:134789379-134789423                          | NM_001080746:1216       | Gtf2i         | INSIDE                 | 1.028                                                        | 1.775                          | 967.34             | 1717.32            | 1.825                          | 787.68             | 1437.66            |
| A_68_P23222743 | chr4:114659620-114659664                          | NM_025647:191           | Cmpk1         | INSIDE                 | 1.028                                                        | 0.452                          | 1034.30            | 467.55             | 0.465                          | 763.12             | 354.69             |
| A_68_P22317133 | chr3:88894786-88894830                            | NM_001083808:855        | Rusc1         | PROMOTER               | 1.028                                                        | 0.474                          | 2259.42            | 1070.18            | 0.487                          | 1672.88            | 814.66             |
| A_68_P21836891 | chr2:167515250-167515294                          | NM_009883:858           | Cebpb         | INSIDE                 | 1.028                                                        | 0.367                          | 1221.59            | 448.21             | 0.377                          | 974.73             | 367.58             |
| A_68_P21747319 | chr2:151874059-151874103                          |                         | Unknown       | Unknown                | 1.028                                                        | 0.467                          | 1234.37            | 575.86             | 0.479                          | 901.72             | 432.30             |
| A_68_P20837648 | chr1:175297264-175297308                          | NM_053199:540           | Cadm3         | INSIDE                 | 1.028                                                        | 0.287                          | 4533.21            | 1302.80            | 0.295                          | 3274.71            | 967.07             |
| A_68_P20768944 | chr1:162836948-162836992                          | NM_001024952:429        | Rc3h1         | INSIDE                 | 1.028                                                        | 1.918                          | 490.06             | 940.13             | 1.971                          | 438.82             | 865.01             |
| A_68_P32241860 | chrX:7706225-7706269                              | NR_029428:3727          | Wdr13         | INSIDE                 | 1.027                                                        | 3.001                          | 974.44             | 2924.49            | 3.083                          | 1222.90            | 3770.62            |
| A_68_P31286845 | chr17:63230423-63230467                           | NM_010109:222           | Efnaf5        | INSIDE                 | 1.027                                                        | 0.446                          | 1921.93            | 857.28             | 0.458                          | 1269.52            | 581.37             |
| A_68_P30778639 | chr16:55974658-55974702                           | NR_027965:50            | 2310061J03Rik | INSIDE                 | 1.027                                                        | 0.536                          | 1226.06            | 657.76             | 0.551                          | 1053.44            | 580.69             |
| A_68_P29116252 | chr13:69672648-69672692                           | NM_001169131:72         | Papd7         | INSIDE                 | 1.027                                                        | 3.092                          | 603.18             | 1865.23            | 3.175                          | 519.35             | 1648.76            |
| A_68_P28048175 | chr11:96880255-96880299                           | NM_031183:5394          | Sp6           | INSIDE                 | 1.027                                                        | 2.355                          | 652.08             | 1535.57            | 2.418                          | 554.57             | 1341.02            |
| A_68_P27973894 | chr1:183664886-83664930                           | NM_009330:538           | Hnf1b         | INSIDE                 | 1.027                                                        | 0.480                          | 2889.18            | 1386.93            | 0.493                          | 2159.05            | 1064.05            |
| A_68_P27282448 | chr10:79783216-79783260                           | NM_025521:55            | 2310011J03Rik | INSIDE                 | 1.027                                                        | 1.825                          | 954.74             | 1742.14            | 1.873                          | 653.04             | 1223.33            |
| A_68_P27278629 | chr10:79202122-79202166                           | NM_172551:7182          | Polmt         | INSIDE                 | 1.027                                                        | 2.168                          | 1566.03            | 3395.01            | 2.227                          | 1193.28            | 2657.74            |
| A_68_P26486126 | chr9:47339043-47339087                            | NM_001025600:630        | Cadm1         | INSIDE                 | 1.027                                                        | 0.372                          | 3008.34            | 1120.01            | 0.382                          | 2206.02            | 843.78             |
| A_68_P25228982 | chr7:80562603-80562647                            | NM_177740:42219         | Rgna          | INSIDE                 | 1.027                                                        | 1.605                          | 1375.94            | 2209.05            | 1.649                          | 1048.42            | 1729.19            |
| A_68_P25176078 | chr7:71432596-71432640                            | NM_172742:63            | Mtmr10        | INSIDE                 | 1.027                                                        | 1.697                          | 977.11             | 1658.48            | 1.743                          | 781.19             | 1361.73            |
| A_68_P25027721 | chr7:30303289-30303333                            | ENSMUST00000141713:-913 |               | PROMOTER               | 1.027                                                        | 0.240                          | 2153.16            | 517.39             | 0.247                          | 1515.43            | 374.10             |
| A_68_P23134360 | chr4:97444653-97444697                            | NM_001122953:358        | Nfia          | INSIDE                 | 1.027                                                        | 0.393                          | 1143.57            | 449.59             | 0.404                          | 770.62             | 311.15             |
| A_68_P22356952 | chr3:97692829-97692873                            | NM_001039376:-220       | Pde4dip       | PROMOTER               | 1.027                                                        | 0.441                          | 1046.93            | 461.93             | 0.453                          | 864.88             | 391.74             |
| A_68_P21221948 | chr2:52717600-52717648                            | NM_172409:723           | Fmnl2         | INSIDE                 | 1.027                                                        | 2.871                          | 672.45             | 1930.59            | 2.950                          | 488.15             | 1439.95            |
| A_68_P21118608 | chr2:32822540-32822584                            | NM_009076:5331          | Rpl12         | DOWNSTREAM             | 1.027                                                        | 0.357                          | 1417.95            | 506.13             | 0.367                          | 926.68             | 339.68             |
| A_68_P20412113 | chr1:88330886-88330930                            | NM_027966:8005          | 1700019O17Rik | DOWNSTREAM             | 1.027                                                        | 0.497                          | 2049.91            | 1019.20            | 0.510                          | 1667.06            | 850.95             |
| A_68_P31145427 | chr17:32533746-32533790                           | NR_029458:-6190         | A530088E08Rik | PROMOTER               | 1.026                                                        | 0.233                          | 2941.05            | 686.64             | 0.240                          | 2232.81            | 535.10             |
| A_68_P30656973 | chr16:33251896-33251940                           | NM_080557:377           | Smx4          | INSIDE                 | 1.026                                                        | 0.373                          | 1588.26            | 591.97             | 0.382                          | 1346.05            | 514.74             |
| A_68_P28092301 | chr11:104547023-104547067                         | ENSMUST00000148007:24   |               | INSIDE                 | 1.026                                                        | 1.815                          | 1153.70            | 2094.02            | 1.862                          | 1035.60            | 1928.15            |
| A_68_P27902564 | chr11:70578153-70578197                           | NM_177565:226           | Zfp3          | INSIDE                 | 1.026                                                        | 0.466                          | 1334.07            | 621.97             | 0.478                          | 1000.17            | 478.23             |
| A_68_P25031209 | chr7:31145387-31145431                            | NM_175478:2383          | Lrfn3         | INSIDE                 | 1.026                                                        | 2.588                          | 554.63             | 1435.61            | 2.655                          | 443.60             | 1177.61            |
| A_68_P25020499 | chr7:28954819-28954863                            | NM_007991:74            | Fbl           | INSIDE                 | 1.026                                                        | 1.546                          | 2472.54            | 3821.69            | 1.585                          | 1855.55            | 2941.20            |
| A_68_P24992917 | chr7:19955431-19955475                            | NM_001010836:8888       | Ppp1r13l      | INSIDE                 | 1.026                                                        | 1.999                          | 1811.47            | 3621.15            | 2.051                          | 1416.63            | 2906.22            |
| A_68_P24132967 | chr5:139470355-139470399                          | NM_008808:531           | Pdgfra        | INSIDE                 | 1.026                                                        | 0.265                          | 1989.14            | 526.38             | 0.271                          | 1650.69            | 448.01             |
| A_68_P23602238 | chr5:36022053-36022097                            | NM_030127:357           | Htra3         | INSIDE                 | 1.026                                                        | 4.984                          | 1983.99            | 9888.48            | 5.112                          | 1818.93            | 9299.16            |
| A_68_P23284201 | chr4:126910870-126910914                          | NM_198618:64378         | Dlgap3        | INSIDE                 | 1.026                                                        | 1.870                          | 1106.02            | 2067.76            | 1.917                          | 859.16             | 1647.42            |
| A_68_P22383909 | chr3:102824881-102824925                          | NM_001161854:434        | Csdc1         | INSIDE                 | 1.026                                                        | 0.334                          | 5274.04            | 1762.78            | 0.343                          | 3783.56            | 1297.93            |
| A_68_P21006478 | chr2:11423381-11423425                            | NM_00117752:315         | Pfkfb3        | INSIDE                 | 1.026                                                        | 0.585                          | 1633.17            | 955.38             | 0.600                          | 1060.11            | 636.11             |
| A_68_P31458875 | chr18:3507840-3507884                             | NM_026505:92            | Bambi         | PROMOTER               | 1.025                                                        | 24.747                         | 2341.55            | 57946.94           | 25.357                         | 2110.78            | 53523.43           |
| A_68_P31253725 | chr17:56218817-56218862                           | NM_008233:-240          | Hdgfrp2       | DIVERGENT_PROMOTER     | 1.025                                                        | 0.359                          | 7695.12            | 2764.73            | 0.368                          | 5385.82            | 1982.74            |
| A_68_P30631089 | chr16:28564952-28564996                           | NM_010199:188314        | Fgfl2         | INSIDE                 | 1.025                                                        | 1.779                          | 1689.46            | 1279.46            | 1.823                          | 834.67             | 1521.92            |
| A_68_P28280591 | chr12:21423034-21423078                           | NM_011739:241           | Ywhaq         | INSIDE                 | 1.025                                                        | 0.615                          | 2055.45            | 1264.32            | 0.631                          | 1573.71            | 992.38             |
| A_68_P28043747 | chr11:96181632-96181676                           | NM_010459:2074          | Hoxb4         | INSIDE                 | 1.025                                                        | 1.997                          | 781.33             | 1560.37            | 2.046                          | 577.32             | 1181.40            |
| A_68_P27234952 | chr10:70810826-70810870                           | NM_027184:308           | Ipmk          | INSIDE                 | 1.025                                                        | 0.339                          | 5226.41            | 1773.12            | 0.348                          | 3925.12            | 1364.40            |
| A_68_P26526444 | chr9:54407560-54407610                            | NM_019686:302           | Cib2          | INSIDE                 | 1.025                                                        | 1.839                          | 659.96             | 1213.61            | 1.885                          | 615.92             | 1161.01            |

| ProbeName      | Target position of probe on CpG island microarray | TargetID                | GeneSymbol    | CpG island Description | Ratio of relative methylation (TiO <sub>2</sub> -NP/Vehicle) | Sham group                     |                    |                    | TiO <sub>2</sub> -H group      |                    |                    |
|----------------|---------------------------------------------------|-------------------------|---------------|------------------------|--------------------------------------------------------------|--------------------------------|--------------------|--------------------|--------------------------------|--------------------|--------------------|
|                |                                                   |                         |               |                        |                                                              | Relative methylation (Cy5/Cy3) | Cy3 signal (Input) | Cy5 signal (MeDIP) | Relative methylation (Cy5/Cy3) | Cy3 signal (Input) | Cy5 signal (MeDIP) |
| A_68_P26467387 | chr9:44205049-44205093                            | NM_008063:-1188         | Slc37a4       | PROMOTER               | 1.025                                                        | 0.416                          | 1926.28            | 800.66             | 0.426                          | 1540.69            | 656.35             |
| A_68_P26304291 | chr9:11277863-11277907                            |                         | Unknown       |                        | 1.025                                                        | 2.542                          | 278.88             | 708.81             | 2.606                          | 305.80             | 796.79             |
| A_68_P25083583 | chr7:50932042-50932086                            | NM_145582:4664          | Cttnl         | INSIDE                 | 1.025                                                        | 3.405                          | 1327.06            | 4518.27            | 3.488                          | 977.16             | 3408.66            |
| A_68_P24602908 | chr6:85026279-85026323                            | NR_002702:166           | Npm3-ps1      | INSIDE                 | 1.025                                                        | 1.777                          | 603.15             | 1071.64            | 1.822                          | 517.50             | 942.89             |
| A_68_P24381992 | chr6:39155917-39155961                            | NM_001033430:834        | Jhdm1d        | INSIDE                 | 1.025                                                        | 2.372                          | 721.82             | 1712.47            | 2.432                          | 614.25             | 1494.09            |
| A_68_P23720363 | chr5:58110379-58110423                            | NM_018764:1141          | Pcdh7         | INSIDE                 | 1.025                                                        | 0.614                          | 1834.51            | 1126.03            | 0.629                          | 1475.00            | 927.98             |
| A_68_P22973925 | chr4:63678841-63678885                            | NM_011607:29187         | Tnc           | INSIDE                 | 1.025                                                        | 11.380                         | 1460.64            | 16621.92           | 11.669                         | 1193.38            | 13925.88           |
| A_68_P21103453 | chr2:30330211-30330255                            | NM_030244:-513          | Ier5l         | PROMOTER               | 1.025                                                        | 0.514                          | 1114.75            | 572.57             | 0.526                          | 866.10             | 455.82             |
| A_68_P20679834 | chr1:145586536-145586580                          | NM_001038592:-139       | Glrx2         | PROMOTER               | 1.025                                                        | 1.526                          | 1382.93            | 2110.55            | 1.564                          | 1091.06            | 1706.35            |
| A_68_P20419588 | chr1:89652379-89652423                            | NM_001205391:-185       | Atgl6l1       | PROMOTER               | 1.025                                                        | 1.718                          | 867.81             | 1491.31            | 1.762                          | 790.92             | 1393.41            |
| A_68_P31156002 | chr17:34973346-34973390                           | NM_019442:480           | Stk19         | INSIDE                 | 1.024                                                        | 0.540                          | 1769.54            | 955.37             | 0.553                          | 1402.44            | 775.55             |
| A_68_P30970269 | chr16:92606424-92606468                           | NM_001111023-91127      | Runx1         | INSIDE                 | 1.024                                                        | 0.539                          | 1386.10            | 747.62             | 0.552                          | 1039.88            | 574.24             |
| A_68_P28751329 | chr12:113858290-113858334                         | NM_007421:-55           | Adssl1        | INSIDE                 | 1.024                                                        | 0.369                          | 1512.73            | 558.14             | 0.378                          | 1110.47            | 419.40             |
| A_68_P28098880 | chr11:105847454-105847498                         | NM_009598:10955         | Ace           | INSIDE                 | 1.024                                                        | 2.129                          | 495.47             | 1054.65            | 2.181                          | 429.06             | 935.60             |
| A_68_P26140463 | chr8:109127687-109127731                          | NM_009864:441           | Cdh1          | INSIDE                 | 1.024                                                        | 1.918                          | 892.61             | 1711.96            | 1.963                          | 765.80             | 1503.41            |
| A_68_P25508347 | chr7:135110935-135110979                          | NM_139149:-36           | Fus           | PROMOTER               | 1.024                                                        | 1.954                          | 1005.25            | 1964.16            | 2.002                          | 822.08             | 1645.52            |
| A_68_P25193398 | chr7:74517805-74517849                            | NM_001033713:-82        | Me12a         | PROMOTER               | 1.024                                                        | 1.681                          | 1558.20            | 2620.03            | 1.722                          | 1160.82            | 1999.45            |
| A_68_P25081790 | chr7:50568129-50568173                            | NM_027264:481           | Zfp715        | INSIDE                 | 1.024                                                        | 0.626                          | 2307.32            | 1444.52            | 0.641                          | 1864.35            | 1195.15            |
| A_68_P25017993 | chr7:28377186-28377230                            | NM_001110208:630        | Akt2          | INSIDE                 | 1.024                                                        | 0.400                          | 2432.02            | 972.15             | 0.409                          | 1863.84            | 763.02             |
| A_68_P24119914 | chr5:136674559-136674603                          | NM_025774:244           | Prkrip1       | INSIDE                 | 1.024                                                        | 0.272                          | 2144.34            | 582.67             | 0.278                          | 1686.52            | 469.13             |
| A_68_P23618574 | chr5:38668317-38668361                            | NM_127209:-304          | Otop1         | PROMOTER               | 1.024                                                        | 0.466                          | 1859.43            | 866.96             | 0.478                          | 1475.12            | 704.38             |
| A_68_P21774857 | chr2:156866238-156866282                          | NM_001164663:38741      | 9830001H06Rik | INSIDE                 | 1.024                                                        | 2.514                          | 272.96             | 686.23             | 2.574                          | 263.29             | 677.59             |
| A_68_P21052783 | chr2:20890077-20890121                            | NR_033225:-402          | Gml13375      | DIVERGENT_PROMOTER     | 1.024                                                        | 0.652                          | 2439.97            | 1589.78            | 0.667                          | 1697.53            | 1132.60            |
| A_68_P20442010 | chr1:93263130-93263174                            | NM_173395:146           | Fam132b       | INSIDE                 | 1.024                                                        | 0.368                          | 1270.54            | 467.78             | 0.377                          | 1100.44            | 414.89             |
| A_68_P20409046 | chr1:87791116-87791160                            | NM_022417:54            | Itm2c         | INSIDE                 | 1.024                                                        | 0.202                          | 4576.53            | 926.52             | 0.207                          | 2982.64            | 618.35             |
| A_68_P32128433 | chr19:43827788-43827832                           | NM_001113562:298        | Cute          | INSIDE                 | 1.023                                                        | 0.281                          | 2553.75            | 717.69             | 0.288                          | 1834.74            | 527.72             |
| A_68_P31402642 | chr17:844495931-844495975                         | AK043195:-259           |               | PROMOTER               | 1.023                                                        | 0.458                          | 1324.21            | 606.54             | 0.469                          | 1069.11            | 501.16             |
| A_68_P31116319 | chr17:27572063-27572107                           | NM_001013385:68165      | Gm4           | INSIDE                 | 1.023                                                        | 1.646                          | 1573.72            | 2589.57            | 1.684                          | 1125.91            | 1895.98            |
| A_68_P30991545 | chr16:96413628-96413672                           | NM_001001492:214        | Lca5l         | INSIDE                 | 1.023                                                        | 0.440                          | 1238.94            | 545.51             | 0.450                          | 1032.18            | 464.84             |
| A_68_P29848865 | chr14:100684720-100684764                         | AK021307:-1136          |               | PROMOTER               | 1.023                                                        | 2.171                          | 1457.44            | 3163.95            | 2.220                          | 1108.39            | 2460.45            |
| A_68_P28036751 | chr11:94979621-94979665                           | NM_010055:-1788         | Dlx3          | PROMOTER               | 1.023                                                        | 1.824                          | 862.53             | 1572.91            | 1.865                          | 648.37             | 1209.15            |
| A_68_P28036509 | chr11:94937682-94937726                           | NM_013565:324           | Itga3         | INSIDE                 | 1.023                                                        | 0.310                          | 1465.01            | 453.87             | 0.317                          | 1148.49            | 363.86             |
| A_68_P27787099 | chr11:49988480-49988526                           | NM_026543:150           | 3010026O09Rik | INSIDE                 | 1.023                                                        | 1.498                          | 3143.87            | 4710.10            | 1.532                          | 2336.17            | 3579.79            |
| A_68_P26715672 | chr9:89949316-89949360                            | NM_007801:234           | Ctsh          | INSIDE                 | 1.023                                                        | 0.423                          | 2527.73            | 1070.21            | 0.433                          | 2042.20            | 884.82             |
| A_68_P24816836 | chr6:124705997-124706041                          | NM_007881:487           | Atn1          | INSIDE                 | 1.023                                                        | 0.600                          | 2254.67            | 1351.69            | 0.613                          | 1710.07            | 1048.33            |
| A_68_P24424177 | chr6:47601567-47601611                            | NR_002841:3505          | Rn4_5s        | DOWNSTREAM             | 1.023                                                        | 1.352                          | 3079.82            | 4162.85            | 1.383                          | 2500.78            | 3459.18            |
| A_68_P22592103 | chr3:142364167-142364211                          | NM_173763:145           | Ccbl2         | INSIDE                 | 1.023                                                        | 0.263                          | 3137.39            | 824.28             | 0.269                          | 2402.30            | 645.60             |
| A_68_P21779875 | chr2:157741034-157741081                          | NM_198627:669           | Vstm2l        | INSIDE                 | 1.023                                                        | 2.351                          | 1182.26            | 2778.93            | 2.404                          | 807.80             | 1942.03            |
| A_68_P21761084 | chr2:154375582-154375626                          | NM_029305:965           | 1700003F12Rik | INSIDE                 | 1.023                                                        | 0.471                          | 1472.97            | 694.21             | 0.482                          | 1219.52            | 588.13             |
| A_68_P31619440 | chr18:35814836-35814880                           | NM_027222:-5837         | 2010001M09Rik | PROMOTER               | 1.022                                                        | 0.463                          | 1513.80            | 701.26             | 0.474                          | 1206.24            | 571.32             |
| A_68_P31166994 | chr17:37188152-37188196                           | NM_019439:5264          | Gabbr1        | INSIDE                 | 1.022                                                        | 0.411                          | 1239.74            | 509.28             | 0.420                          | 849.05             | 356.37             |
| A_68_P28094596 | chr11:105026660-105026704                         | ENSMUST00000118770:1252 |               | INSIDE                 | 1.022                                                        | 2.933                          | 513.14             | 1505.12            | 2.997                          | 438.22             | 1313.29            |
| A_68_P26897299 | chr9:123760705-123760749                          | NM_148925:56            | Fyco1         | INSIDE                 | 1.022                                                        | 2.599                          | 366.86             | 953.32             | 2.655                          | 309.76             | 822.46             |
| A_68_P26811950 | chr9:107838507-107838551                          | NM_145621:278           | Camkv         | INSIDE                 | 1.022                                                        | 0.268                          | 2082.04            | 558.50             | 0.274                          | 1726.36            | 473.14             |
| A_68_P25667334 | chr8:13287426-13287470                            | NM_172282:-564          | Tmco3         | PROMOTER               | 1.022                                                        | 0.599                          | 2882.24            | 1727.50            | 0.612                          | 1870.48            | 1145.22            |
| A_68_P24043271 | chr5:121671135-121671179                          | ENSMUST00000119892:929  |               | INSIDE                 | 1.022                                                        | 0.642                          | 3333.44            | 2138.84            | 0.656                          | 2506.12            | 1643.18            |
| A_68_P23881743 | chr5:90652818-90652862                            | NM_001033310:181        | Cox18         | INSIDE                 | 1.022                                                        | 4.777                          | 671.66             | 3208.58            | 4.882                          | 560.23             | 2734.83            |
| A_68_P23222368 | chr4:114598578-114598622                          | NM_015758:18            | Foxe3         | INSIDE                 | 1.022                                                        | 0.213                          | 3127.32            | 665.19             | 0.217                          | 2304.63            | 501.07             |
| A_68_P21680284 | chr2:139503094-139503138                          | NM_001126490:-797       | Ism1          | PROMOTER               | 1.022                                                        | 1.902                          | 1345.08            | 2558.39            | 1.944                          | 1200.01            | 2333.22            |
| A_68_P21115155 | chr2:32251561-32251605                            | NM_133783:173           | Ptges2        | INSIDE                 | 1.022                                                        | 0.499                          | 3808.93            | 1901.07            | 0.510                          | 2544.10            | 1297.54            |
| A_68_P32700327 | chrX:137200260-137200304                          | ENSMUST00000112988:672  |               | INSIDE                 | 1.021                                                        | 2.255                          | 599.39             | 1351.81            | 2.303                          | 868.95             | 2001.40            |
| A_68_P32127486 | chr19:43675876-43675920                           |                         | Unknown       |                        | 1.021                                                        | 0.489                          | 2624.75            | 1282.20            | 0.499                          | 1882.44            | 938.71             |
| A_68_P31093570 | chr17:23908581-23908625                           | NM_153791:-44           | Flywch1       | PROMOTER               | 1.021                                                        | 0.294                          | 1976.96            | 580.74             | 0.300                          | 1446.67            | 433.75             |
| A_68_P30961691 | chr16:91226111-91226155                           | NM_016967:338           | Olig2         | INSIDE                 | 1.021                                                        | 0.450                          | 1098.38            | 493.89             | 0.459                          | 836.12             | 383.94             |
| A_68_P30181641 | chr15:44451230-44451274                           | NM_019480:66            | Ebag9         | INSIDE                 | 1.021                                                        | 0.344                          | 1521.55            | 522.73             | 0.351                          | 1316.21            | 461.76             |
| A_68_P30010835 | chr15:10415837-10415882                           | NM_011232:71            | Rad1          | INSIDE                 | 1.021                                                        | 0.382                          | 4276.48            | 1632.67            | 0.390                          | 3238.75            | 1262.78            |
| A_68_P29616401 | chr14:55732942-55732986                           | NM_177049:2808          | Jph4          | INSIDE                 | 1.021                                                        | 1.544                          | 1113.71            | 1719.75            | 1.577                          | 866.19             | 1366.13            |
| A_68_P28834525 | chr13:13683099-13683143                           | NM_010748:445           | Lyst          | INSIDE                 | 1.021                                                        | 0.399                          | 1702.32            | 679.06             | 0.407                          | 1203.19            | 489.82             |
| A_68_P28724528 | chr12:109155568-109155612                         | NM_001079883:86034      | Bcl11b        | INSIDE                 | 1.021                                                        | 1.643                          | 1220.79            | 2005.79            | 1.677                          | 917.40             | 1538.30            |
| A_68_P28582807 | chr12:82881694-82881738                           | NM_001174107:441        | Map3k9        | INSIDE                 | 1.021                                                        | 0.649                          | 2690.21            | 1747.28            | 0.663                          | 1994.23            | 1322.89            |
| A_68_P26082711 | chr8:97855540-97855584                            | NM_024467:288           | Zfp319        | INSIDE                 | 1.021                                                        | 4.876                          | 2388.56            | 11647.24           | 4.977                          | 1864.55            | 9278.95            |
| A_68_P24919226 | chr6:144730238-144730282                          | ENSMUST00000149451:179  |               |                        | 1.021                                                        | 2.721                          | 752.89             | 2048.85            | 2.779                          | 638.36             | 1774.23            |
| A_68_P24127312 | chr5:138182456-138182500                          | NM_175521:-1252         | 6430598A04Rik | DIVERGENT_PROMOTER     | 1.021                                                        | 1.772                          | 7258.33            | 12861.31           | 1.808                          | 4209.86            | 7612.69            |
| A_68_P23498118 | chr5:15440585-15440629                            | NM_001110843:98         | Caena2d1      | INSIDE                 | 1.021                                                        | 2.554                          | 813.59             | 2077.92            | 2.607                          | 690.34             | 1800.01            |
| A_68_P23331230 | chr4:135477014-135477058                          | NM_024243:396           | Fuca1         | INSIDE                 | 1.021                                                        | 0.406                          | 2437.15            | 990.07             | 0.415                          | 1830.81            | 759.47             |

| ProbeName      | Target position of probe on CpG island microarray | TargetID                | GeneSymbol    | CpG island Description | Ratio of relative methylation (TiO <sub>2</sub> -NP/Vehicle) | Sham group                     |                    |                    | TiO <sub>2</sub> -H group      |                    |                    |
|----------------|---------------------------------------------------|-------------------------|---------------|------------------------|--------------------------------------------------------------|--------------------------------|--------------------|--------------------|--------------------------------|--------------------|--------------------|
|                |                                                   |                         |               |                        |                                                              | Relative methylation (Cy5/Cy3) | Cy3 signal (Input) | Cy5 signal (MeDIP) | Relative methylation (Cy5/Cy3) | Cy3 signal (Input) | Cy5 signal (MeDIP) |
| A_68_P22314616 | chr3:88383591-88383635                            | NM_025448:20            | Ssr2          | INSIDE                 | 1.021                                                        | 0.472                          | 1391.90            | 657.02             | 0.482                          | 1091.85            | 526.42             |
| A_68_P21901049 | chr2:179777225-179777269                          | NM_178750:59            | Ss18l1        | INSIDE                 | 1.021                                                        | 0.425                          | 2743.77            | 1166.32            | 0.434                          | 2102.70            | 912.80             |
| A_68_P32454733 | chrX:68917522-68917566                            | NM_010340:603           | Gpr50         | INSIDE                 | 1.020                                                        | 2.133                          | 215.00             | 458.68             | 2.176                          | 344.64             | 750.00             |
| A_68_P29613437 | chr14:55259966-55260010                           | NM_199470:213           | Cdh24         | INSIDE                 | 1.020                                                        | 0.344                          | 3294.95            | 1134.30            | 0.351                          | 2732.74            | 959.99             |
| A_68_P27924619 | chr11:74986101-74986145                           | NR_029794:-767          | Mir212        | DIVERGENT_PROMOTER     | 1.020                                                        | 0.221                          | 4252.71            | 940.51             | 0.226                          | 2937.17            | 662.59             |
| A_68_P26127081 | chr8:106695023-106695067                          | NM_001141922:632        | Bean1         | INSIDE                 | 1.020                                                        | 0.488                          | 1667.27            | 814.16             | 0.498                          | 1361.35            | 678.31             |
| A_68_P25434394 | chr7:121261406-121261450                          | NM_025846:-133          | Rras2         | PROMOTER               | 1.020                                                        | 0.327                          | 1732.31            | 567.16             | 0.334                          | 1408.44            | 470.40             |
| A_68_P24983171 | chr7:17357272-17357316                            | NM_009201:-9400         | Slc1a5        | PROMOTER               | 1.020                                                        | 1.814                          | 1687.13            | 3060.79            | 1.851                          | 1236.90            | 2289.01            |
| A_68_P23398855 | chr4:148511571-148511616                          | NM_027263:116           | Aptid1        | INSIDE                 | 1.020                                                        | 0.408                          | 1518.78            | 619.32             | 0.416                          | 1096.83            | 456.22             |
| A_68_P22917598 | chr4:52452191-52452235                            | NM_008017:92            | Sme2          | INSIDE                 | 1.020                                                        | 0.255                          | 2279.27            | 581.37             | 0.260                          | 1882.65            | 489.95             |
| A_68_P22889708 | chr4:46633313-46633357                            | NM_198664:29737         | Tbcd12        | INSIDE                 | 1.020                                                        | 0.595                          | 3257.42            | 1938.14            | 0.607                          | 2174.84            | 1319.90            |
| A_68_P22356948 | chr3:97692392-97692436                            | NM_001039376:216        | Pde4dip       | INSIDE                 | 1.020                                                        | 0.421                          | 2891.90            | 1218.83            | 0.430                          | 2232.71            | 959.42             |
| A_68_P21635699 | chr2:131387297-131387341                          | NM_013460:703           | Adra1d        | INSIDE                 | 1.020                                                        | 0.478                          | 2247.21            | 1075.23            | 0.488                          | 1692.83            | 825.93             |
| A_68_P20352245 | chr1:75139100-75139144                            | NM_026977:-180          | 1810031K17Rik | DIVERGENT_PROMOTER     | 1.020                                                        | 0.599                          | 4374.93            | 2620.96            | 0.611                          | 3084.22            | 1884.51            |
| A_68_P32203261 | chr19:56896363-56896407                           | NM_001002238:-4314      | Tdrd1         | DIVERGENT_PROMOTER     | 1.019                                                        | 0.560                          | 1674.81            | 938.34             | 0.571                          | 1409.71            | 804.64             |
| A_68_P31627038 | chr18:37303465-37303509                           | NM_001003672:-136       | Pcdhac2       | PROMOTER               | 1.019                                                        | 0.359                          | 1888.15            | 678.50             | 0.366                          | 1562.96            | 572.16             |
| A_68_P31347823 | chr17:74058995-74059039                           | NM_027864:775           | Galnt14       | INSIDE                 | 1.019                                                        | 0.257                          | 2636.25            | 677.95             | 0.262                          | 2115.62            | 554.29             |
| A_68_P31114358 | chr17:27252888-27252932                           | NM_080553:58662         | Itpr3         | INSIDE                 | 1.019                                                        | 2.671                          | 1110.38            | 2966.02            | 2.723                          | 793.19             | 2159.82            |
| A_68_P30350131 | chr15:76541158-76541202                           | NM_145471:11            | Lrrc14        | INSIDE                 | 1.019                                                        | 0.282                          | 2615.78            | 736.85             | 0.287                          | 1908.44            | 547.97             |
| A_68_P27922685 | chr11:74643761-74643805                           | NM_010813:-643          | Mnt           | PROMOTER               | 1.019                                                        | 2.018                          | 805.90             | 1626.47            | 2.056                          | 768.44             | 1580.02            |
| A_68_P27815757 | chr11:55283721-55283765                           | NM_013716:489           | G3bp1         | INSIDE                 | 1.019                                                        | 0.449                          | 2063.53            | 925.90             | 0.457                          | 1556.98            | 711.65             |
| A_68_P26595469 | chr9:66682493-66682537                            | NM_026674:-1            | Aph1c         | PROMOTER               | 1.019                                                        | 0.493                          | 1921.72            | 948.13             | 0.503                          | 1414.38            | 711.13             |
| A_68_P26346747 | chr9:21172590-21172634                            | NM_001042708:166        | Ilf3          | INSIDE                 | 1.019                                                        | 0.389                          | 1976.97            | 768.84             | 0.396                          | 1622.07            | 642.75             |
| A_68_P25997731 | chr8:82581263-82581307                            | NM_020259:623           | Hhip          | INSIDE                 | 1.019                                                        | 0.446                          | 1098.24            | 489.71             | 0.454                          | 830.89             | 377.40             |
| A_68_P25669972 | chr8:13677124-13677168                            | NM_009025:441           | Rasa3         | INSIDE                 | 1.019                                                        | 0.294                          | 2761.01            | 813.09             | 0.300                          | 1967.04            | 590.17             |
| A_68_P24951536 | chr7:4960475-4960519                              | NM_001110330:4348       | Fiz1          | INSIDE                 | 1.019                                                        | 1.685                          | 891.91             | 1502.88            | 1.717                          | 640.23             | 1099.02            |
| A_68_P24931167 | chr6:146837167-146837211                          | NM_001170433:173        | Ppfbp1        | INSIDE                 | 1.019                                                        | 0.543                          | 2461.41            | 1335.73            | 0.553                          | 2024.70            | 1119.28            |
| A_68_P24183981 | chr5:150040843-150040887                          | AK155259:18394          |               | DOWNSTREAM             | 1.019                                                        | 0.378                          | 1794.30            | 678.37             | 0.385                          | 1494.08            | 575.49             |
| A_68_P24119912 | chr5:136674383-136674427                          | NM_025774:420           | Prkrip1       | INSIDE                 | 1.019                                                        | 0.540                          | 1770.19            | 955.56             | 0.550                          | 1336.83            | 735.11             |
| A_68_P24098212 | chr5:131915457-131915501                          | NM_177047:1102735       | Aut52         | INSIDE                 | 1.019                                                        | 1.753                          | 1554.70            | 2725.60            | 1.787                          | 1186.00            | 2119.39            |
| A_68_P24002950 | chr5:114724269-114724313                          | NM_148935:-520          | Foxn4         | PROMOTER               | 1.019                                                        | 0.399                          | 2382.85            | 951.52             | 0.407                          | 1902.12            | 774.19             |
| A_68_P21952653 | chr3:13472808-13472852                            | NM_001163328:1176       | Raly1         | INSIDE                 | 1.019                                                        | 0.456                          | 2249.15            | 1025.98            | 0.465                          | 1757.69            | 816.93             |
| A_68_P32565870 | chrX:99044973-99045017                            | NM_001163610:271        | Nhs12         | INSIDE                 | 1.018                                                        | 2.439                          | 602.28             | 1469.22            | 2.483                          | 759.28             | 1885.52            |
| A_68_P30979597 | chr16:94347042-94347086                           | NM_011377:261560        | Sim2          | INSIDE                 | 1.018                                                        | 0.348                          | 2559.71            | 891.22             | 0.354                          | 1969.27            | 697.94             |
| A_68_P30887977 | chr16:77014158-77014202                           | NM_013918:-133          | Usp25         | PROMOTER               | 1.018                                                        | 1.932                          | 893.67             | 1726.53            | 1.967                          | 831.98             | 1636.09            |
| A_68_P29138729 | chr13:73409301-73409345                           | NM_018885:11378         | Irx4          | DOWNSTREAM             | 1.018                                                        | 0.493                          | 2139.55            | 1054.86            | 0.502                          | 1915.48            | 961.65             |
| A_68_P28883194 | chr13:23830758-23830802                           | NM_015786:105           | Hist1hc       | INSIDE                 | 1.018                                                        | 2.781                          | 494.42             | 1374.93            | 2.830                          | 439.18             | 1242.98            |
| A_68_P28107246 | chr11:107330411-107330455                         | NM_145823:1602          | Pitpnc1       | INSIDE                 | 1.018                                                        | 0.290                          | 4486.77            | 1299.11            | 0.295                          | 3401.97            | 1002.91            |
| A_68_P28072866 | chr11:101115247-101115291                         | NM_026776:212           | Vps25         | INSIDE                 | 1.018                                                        | 0.441                          | 1621.55            | 715.84             | 0.449                          | 1195.19            | 537.10             |
| A_68_P27160893 | chr10:57252088-57252132                           | NM_019760:225           | Serinc1       | INSIDE                 | 1.018                                                        | 0.343                          | 2888.03            | 990.22             | 0.349                          | 2171.46            | 757.89             |
| A_68_P26344894 | chr9:20780852-20780896                            | NM_010333:363           | Slpr2         | INSIDE                 | 1.018                                                        | 20.611                         | 3656.91            | 75372.51           | 20.977                         | 4509.82            | 94601.53           |
| A_68_P26077485 | chr8:96958377-96958421                            | NR_015514:605           | 9330175E14Rik | INSIDE                 | 1.018                                                        | 2.120                          | 2320.09            | 4917.83            | 2.157                          | 1786.28            | 3853.15            |
| A_68_P25957540 | chr8:74093690-74093734                            | NM_011977:887           | Slc27a1       | INSIDE                 | 1.018                                                        | 0.467                          | 1314.36            | 614.33             | 0.476                          | 1045.77            | 497.78             |
| A_68_P25910878 | chr8:64069883-64069927                            | NM_001081390:311583     | Palld         | INSIDE                 | 1.018                                                        | 0.373                          | 1390.60            | 519.32             | 0.380                          | 1149.53            | 437.16             |
| A_68_P25354426 | chr7:105342464-105342508                          | NM_001081167:5499       | B3gnt6        | INSIDE                 | 1.018                                                        | 0.225                          | 2126.34            | 478.79             | 0.229                          | 1557.96            | 357.07             |
| A_68_P25262394 | chr7:86805544-86805588                            | NM_029835:485           | 5730590G19Rik | INSIDE                 | 1.018                                                        | 0.333                          | 1786.40            | 595.68             | 0.340                          | 1492.56            | 506.81             |
| A_68_P24951676 | chr7:4982246-4982290                              | NM_001033383:10291      | Zfp865        | INSIDE                 | 1.018                                                        | 3.149                          | 1443.10            | 4544.44            | 3.206                          | 1178.35            | 3777.53            |
| A_68_P23443314 | chr5:3100163-3100207                              | ENSMUST00000161709:9416 |               | DOWNSTREAM             | 1.018                                                        | 2.348                          | 717.60             | 1684.77            | 2.391                          | 721.08             | 1723.99            |
| A_68_P22970308 | chr4:63071362-63071406                            | NM_001045514:-6905      | Akna          | PROMOTER               | 1.018                                                        | 0.369                          | 1549.94            | 572.41             | 0.376                          | 1134.12            | 426.28             |
| A_68_P22964917 | chr4:62180863-62180907                            | NM_008525:213           | Alad          | INSIDE                 | 1.018                                                        | 0.597                          | 3317.38            | 1981.75            | 0.608                          | 2415.95            | 1469.24            |
| A_68_P22069518 | chr3:38383415-38383459                            | NM_001167883:302        | Ankrd50       | INSIDE                 | 1.018                                                        | 0.433                          | 1227.33            | 534.01             | 0.443                          | 1066.25            | 472.27             |
| A_68_P32109309 | chr19:40588021-40588065                           | NM_178362:184           | Sorbs1        | INSIDE                 | 1.017                                                        | 0.422                          | 1850.07            | 781.35             | 0.429                          | 1593.16            | 684.14             |
| A_68_P31932934 | chr19:6140904-6140948                             | NM_019722:211           | Arl2          | INSIDE                 | 1.017                                                        | 0.426                          | 1288.72            | 548.49             | 0.433                          | 1099.25            | 475.92             |
| A_68_P31920647 | chr19:4012600-4012644                             | NM_133666:103           | Ndufv1        | INSIDE                 | 1.017                                                        | 0.552                          | 2467.72            | 1362.95            | 0.562                          | 1887.81            | 1060.78            |
| A_68_P31475769 | chr18:7004843-7004887                             | NM_177595:-87           | Mkx           | PROMOTER               | 1.017                                                        | 2.099                          | 861.07             | 1807.35            | 2.135                          | 689.69             | 1472.40            |
| A_68_P31110190 | chr17:26568998-26569042                           | NM_001081656:17111      | Neurl1b       | INSIDE                 | 1.017                                                        | 3.030                          | 1073.58            | 3253.31            | 3.080                          | 835.25             | 2572.89            |
| A_68_P30650845 | chr16:32079162-32079206                           | NM_177326:175           | Pak2          | INSIDE                 | 1.017                                                        | 2.092                          | 434.63             | 909.39             | 2.127                          | 375.51             | 798.79             |
| A_68_P29023970 | chr13:49311714-49311758                           | NM_026738:-341          | 1110007C09Rik | PROMOTER               | 1.017                                                        | 0.269                          | 3136.68            | 845.31             | 0.274                          | 2304.02            | 631.39             |
| A_68_P28890408 | chr13:25147877-25147921                           | NM_001195617:26         | Dcdc2a        | INSIDE                 | 1.017                                                        | 0.252                          | 1919.78            | 482.88             | 0.256                          | 1438.51            | 368.09             |
| A_68_P27996044 | chr11:87630599-87630643                           | NM_080420:8996          | Lpo           | INSIDE                 | 1.017                                                        | 2.250                          | 2734.24            | 6153.07            | 2.288                          | 2105.99            | 4818.31            |
| A_68_P27996044 | chr11:87577886-87577930                           | NM_172449:3866          | Bzap1         | INSIDE                 | 1.017                                                        | 7.696                          | 1250.85            | 9626.42            | 7.824                          | 8265.88            | 8265.88            |
| A_68_P27808204 | chr11:53914341-53914385                           | NM_001136076:-63        | P4ha2         | PROMOTER               | 1.017                                                        | 1.838                          | 956.66             | 1758.00            | 1.869                          | 793.85             | 1483.87            |
| A_68_P27277827 | chr10:79076635-79076679                           | NM_198614:107           | C2cd4c        | INSIDE                 | 1.017                                                        | 2.571                          | 723.14             | 1859.30            | 2.616                          | 607.99             | 1590.25            |
| A_68_P26504864 | chr9:50467840-50467884                            | NM_145614:23            | Dlat          | INSIDE                 | 1.017                                                        | 0.408                          | 1473.54            | 601.51             | 0.415                          | 1190.41            | 494.42             |
| A_68_P25701519 | chr8:18950799-18950843                            | NM_001113350:153        | Xkr5          | INSIDE                 | 1.017                                                        | 0.312                          | 1713.18            | 535.27             | 0.318                          | 1450.18            | 460.95             |

| ProbeName      | Target position of probe on CpG island microarray | TargetID                 | GeneSymbol    | CpG island Description | Ratio of relative methylation (TiO <sub>2</sub> -NP/Vehicle) | Sham group                     |                    |                    | TiO <sub>2</sub> -H group      |                    |                    |
|----------------|---------------------------------------------------|--------------------------|---------------|------------------------|--------------------------------------------------------------|--------------------------------|--------------------|--------------------|--------------------------------|--------------------|--------------------|
|                |                                                   |                          |               |                        |                                                              | Relative methylation (Cy5/Cy3) | Cy3 signal (Input) | Cy5 signal (MeDIP) | Relative methylation (Cy5/Cy3) | Cy3 signal (Input) | Cy5 signal (MeDIP) |
| A_68_P25496224 | chr7:132851162-132851206                          | NM_207239:18             | Gtf3c1        | INSIDE                 | 1.017                                                        | 0.520                          | 1232.99            | 641.42             | 0.529                          | 927.59             | 490.66             |
| A_68_P21622285 | chr2:128793081-128793125                          | NM_178404:-35            | Zc3h6         | PROMOTER               | 1.017                                                        | 0.278                          | 2017.69            | 561.53             | 0.283                          | 1422.18            | 402.49             |
| A_68_P20945386 | chr1:194596820-194596864                          | NM_144881:-571           | Hhat          | INSIDE                 | 1.017                                                        | 0.368                          | 2237.47            | 823.39             | 0.374                          | 1768.11            | 661.95             |
| A_68_P20121779 | chr1:30929974-30930018                            | NM_001081080:-9895       | Phf3          | PROMOTER               | 1.017                                                        | 1.982                          | 1717.79            | 3404.51            | 2.016                          | 1334.30            | 2689.70            |
| A_68_P32152399 | chr19:47940223-47940267                           | NM_026619:-39            | Gsto2         | PROMOTER               | 1.016                                                        | 2.478                          | 941.36             | 2332.51            | 2.518                          | 783.56             | 1973.21            |
| A_68_P31614992 | chr18:35000409-35000453                           | NM_001204914:188         | Reep2         | INSIDE                 | 1.016                                                        | 0.422                          | 1279.43            | 540.50             | 0.429                          | 988.38             | 424.28             |
| A_68_P29187499 | chr13:83860849-83860893                           | NR_015561:-6840          | C130071C03Rik | PROMOTER               | 1.016                                                        | 0.524                          | 2173.46            | 1139.72            | 0.533                          | 1667.33            | 887.95             |
| A_68_P29020009 | chr13:48641246-48641290                           | NR_029725:-7627          | Mirlet7a-1    | PROMOTER               | 1.016                                                        | 0.354                          | 2177.54            | 769.85             | 0.359                          | 1693.56            | 608.40             |
| A_68_P28183246 | chr11:120098017-120098061                         | NM_198423:3778           | Bahce1        | INSIDE                 | 1.016                                                        | 0.504                          | 2488.44            | 1253.60            | 0.512                          | 1978.68            | 1012.38            |
| A_68_P27307033 | chr10:84647477-84647521                           | NM_007771:301            | Cry1          | INSIDE                 | 1.016                                                        | 1.412                          | 1729.85            | 2442.19            | 1.435                          | 1361.26            | 1952.87            |
| A_68_P26948618 | chr10:12728670-12728714                           | NM_175102:437            | Sf3b5         | INSIDE                 | 1.016                                                        | 0.359                          | 2327.17            | 834.39             | 0.364                          | 1853.93            | 675.25             |
| A_68_P26683640 | chr9:83334897-83334941                            | NM_029434:-184           | Lca5          | PROMOTER               | 1.016                                                        | 0.582                          | 1447.56            | 842.04             | 0.591                          | 1153.68            | 681.74             |
| A_68_P24050683 | chr5:122952536-122952580                          | NM_009722:-324           | Atp2a2        | PROMOTER               | 1.016                                                        | 0.367                          | 1532.16            | 562.70             | 0.373                          | 1158.90            | 432.39             |
| A_68_P24009588 | chr5:115890672-115890717                          | NM_008629:11001          | Ms1l          | INSIDE                 | 1.016                                                        | 4.203                          | 354.62             | 1490.59            | 4.272                          | 292.82             | 1250.83            |
| A_68_P24004678 | chr5:115017216-115017260                          | NM_001004180:-1021       | BC057022      | PROMOTER               | 1.016                                                        | 3.126                          | 543.97             | 1700.23            | 3.175                          | 482.06             | 1530.77            |
| A_68_P23893298 | chr5:92706005-92706049                            | NM_001163687:1181        | Naa           | INSIDE                 | 1.016                                                        | 2.873                          | 1021.82            | 2935.51            | 2.919                          | 922.46             | 2692.32            |
| A_68_P23328515 | chr4:134990204-134990248                          | NM_022980:-506           | Rcan3         | PROMOTER               | 1.016                                                        | 0.485                          | 1846.36            | 895.65             | 0.493                          | 1464.80            | 722.14             |
| A_68_P22202886 | chr3:65762239-65762283                            | NM_019937:-113           | Ccn1l         | PROMOTER               | 1.016                                                        | 0.362                          | 2017.82            | 731.00             | 0.368                          | 1730.89            | 636.80             |
| A_68_P32142240 | chr19:46211708-46211752                           | NM_008852:11085          | Pitx3         | INSIDE                 | 1.015                                                        | 0.369                          | 1334.72            | 492.14             | 0.374                          | 1065.24            | 398.83             |
| A_68_P29337691 | chr13:113717612-113717656                         | NM_028151:-46            | Skiv2l2       | DIVERGENT_PROMOTER     | 1.015                                                        | 0.510                          | 1719.85            | 877.32             | 0.518                          | 1308.47            | 677.56             |
| A_68_P28875601 | chr13:22073468-22073512                           | NM_001162929:428         | Pom12l12      | INSIDE                 | 1.015                                                        | 1.451                          | 1800.10            | 2611.98            | 1.473                          | 1451.67            | 2138.05            |
| A_68_P28567254 | chr12:80130228-80130272                           | NM_181073:101            | Plekhh1       | INSIDE                 | 1.015                                                        | 2.071                          | 459.98             | 952.65             | 2.103                          | 407.59             | 857.01             |
| A_68_P28101956 | chr11:106362407-106362451                         | NR_030703:124            | Snord104      | DOWNSTREAM             | 1.015                                                        | 0.523                          | 1332.02            | 696.49             | 0.531                          | 1127.83            | 598.39             |
| A_68_P27805434 | chr11:53381034-53381078                           | NM_008443:176            | Kif3a         | INSIDE                 | 1.015                                                        | 0.410                          | 2675.09            | 1096.91            | 0.416                          | 2223.10            | 924.89             |
| A_68_P27284176 | chr10:80049548-80049592                           | NM_145421:3516           | Fam108a       | INSIDE                 | 1.015                                                        | 3.120                          | 1984.33            | 6190.80            | 3.167                          | 1561.34            | 4945.20            |
| A_68_P27261497 | chr10:75807668-75807712                           | NM_001081419:317         | Dip2a         | INSIDE                 | 1.015                                                        | 2.662                          | 416.36             | 1108.23            | 2.702                          | 385.56             | 1041.79            |
| A_68_P25957069 | chr8:74009617-74009661                            | NM_001164679:328         | Ano8          | INSIDE                 | 1.015                                                        | 1.464                          | 1593.38            | 2332.02            | 1.486                          | 1319.98            | 1961.67            |
| A_68_P25933299 | chr8:69010150-69010194                            | NM_025465:234            | 1810029B16Rik | INSIDE                 | 1.015                                                        | 0.470                          | 3182.53            | 1495.88            | 0.477                          | 2692.53            | 1284.57            |
| A_68_P25031676 | chr7:31250611-31250655                            | NR_004443:-22            | Nphs1as       | PROMOTER               | 1.015                                                        | 0.366                          | 1880.84            | 687.49             | 0.371                          | 1454.44            | 539.66             |
| A_68_P24780080 | chr6:117118449-117118493                          | NM_021704:-82            | Xcel12        | PROMOTER               | 1.015                                                        | 0.263                          | 9748.86            | 2566.61            | 0.267                          | 7221.97            | 1929.94            |
| A_68_P24586697 | chr6:82041942-82041986                            | NM_145570:50343          | Fam176a       | INSIDE                 | 1.015                                                        | 0.480                          | 1333.24            | 640.30             | 0.487                          | 1014.69            | 494.62             |
| A_68_P24385313 | chr6:39822756-39822801                            |                          | Unknown       | Unknown                | 1.015                                                        | 0.617                          | 1936.79            | 1194.05            | 0.626                          | 1621.90            | 1015.12            |
| A_68_P23971472 | chr5:108796224-108796268                          | ENSMUST00000100944:-2630 |               | PROMOTER               | 1.015                                                        | 0.353                          | 1752.82            | 618.52             | 0.358                          | 1135.19            | 406.44             |
| A_68_P20561475 | chr1:122237683-122237727                          | NM_207233:546            | C1ql2         | INSIDE                 | 1.015                                                        | 1.668                          | 751.52             | 1253.65            | 1.693                          | 601.28             | 1018.22            |
| A_68_P32260807 | chrX:11736583-11736627                            | NM_001168321:877         | Bcor          | INSIDE                 | 1.014                                                        | 2.570                          | 236.94             | 608.96             | 2.606                          | 267.04             | 695.96             |
| A_68_P31841471 | chr18:76305627-76305671                           | NM_145356:325817         | Zbtb7c        | INSIDE                 | 1.014                                                        | 3.148                          | 654.27             | 2059.93            | 3.193                          | 584.00             | 1864.86            |
| A_68_P31829409 | chr18:74224278-74224322                           | NM_172632:303            | Mapk4         | INSIDE                 | 1.014                                                        | 0.313                          | 3044.86            | 954.15             | 0.318                          | 1987.47            | 631.56             |
| A_68_P31344184 | chr17:73457546-73457590                           | NM_001081071:244         | Lclat1        | INSIDE                 | 1.014                                                        | 0.623                          | 1831.15            | 1140.50            | 0.632                          | 1406.80            | 888.54             |
| A_68_P28974160 | chr13:40823639-40823683                           | NM_001122948:2152        | Tcfap2a       | INSIDE                 | 1.014                                                        | 1.540                          | 857.10             | 1319.59            | 1.561                          | 824.19             | 1286.27            |
| A_68_P28549764 | chr12:76770450-76770494                           | NM_028203:52             | Wdr89         | INSIDE                 | 1.014                                                        | 0.247                          | 3416.40            | 842.65             | 0.250                          | 2411.77            | 603.09             |
| A_68_P28157432 | chr11:115970917-115970961                         | NM_001205081:611         | Trim47        | INSIDE                 | 1.014                                                        | 5.362                          | 1510.42            | 8099.39            | 5.435                          | 1099.66            | 5976.91            |
| A_68_P28073805 | chr11:101286632-101286676                         | NM_026865:-7             | 1700113D2Rik  | PROMOTER               | 1.014                                                        | 1.818                          | 660.22             | 1200.17            | 1.843                          | 549.67             | 1013.24            |
| A_68_P27804993 | chr11:53293588-53293632                           | NM_183173:87             | Ankrd43       | INSIDE                 | 1.014                                                        | 0.513                          | 1417.34            | 726.56             | 0.520                          | 1144.31            | 594.53             |
| A_68_P27543828 | chr10:128347300-128347344                         | NM_007653:401            | Cd63          | INSIDE                 | 1.014                                                        | 1.677                          | 2985.38            | 5006.31            | 1.700                          | 2331.22            | 3962.38            |
| A_68_P27272486 | chr10:77632469-77632513                           | NM_138601:23             | D10Jhu81e     | INSIDE                 | 1.014                                                        | 0.639                          | 2054.65            | 1312.38            | 0.648                          | 1706.08            | 1105.30            |
| A_68_P27135751 | chr10:51747176-51747220                           | NM_153786:4707           | Vgll2         | INSIDE                 | 1.014                                                        | 0.407                          | 1792.45            | 728.99             | 0.412                          | 1264.71            | 521.55             |
| A_68_P26823387 | chr9:110283734-110283778                          | NM_001001144:47960       | Scap          | INSIDE                 | 1.014                                                        | 1.682                          | 992.98             | 1670.38            | 1.706                          | 783.47             | 1336.84            |
| A_68_P26080209 | chr8:97437362-97437406                            | NM_001033533:4614        | Ccdc102a      | INSIDE                 | 1.014                                                        | 1.639                          | 1068.42            | 1750.73            | 1.662                          | 813.72             | 1352.70            |
| A_68_P25090670 | chr7:52271335-52271379                            | NM_001008422:263         | Scaf1         | INSIDE                 | 1.014                                                        | 0.408                          | 1349.95            | 550.76             | 0.414                          | 980.39             | 405.46             |
| A_68_P24449299 | chr6:52184163-52184207                            | NM_008263:754            | Hoxa10        | INSIDE                 | 1.014                                                        | 2.597                          | 540.64             | 1404.07            | 2.634                          | 507.17             | 1335.90            |
| A_68_P23281728 | chr4:126412908-126412952                          | NM_198960:583            | Tcfap2e       | INSIDE                 | 1.014                                                        | 0.495                          | 1757.44            | 869.91             | 0.502                          | 1420.33            | 712.91             |
| A_68_P23270362 | chr4:124479885-124479929                          | NM_008636:114            | Mtf1          | INSIDE                 | 1.014                                                        | 0.490                          | 5641.00            | 2765.64            | 0.497                          | 4219.95            | 2098.72            |
| A_68_P23155321 | chr4:101169179-101169223                          | NM_198412:-52            | Dnajc6        | PROMOTER               | 1.014                                                        | 1.862                          | 943.60             | 1756.84            | 1.887                          | 776.17             | 1464.94            |
| A_68_P22149458 | chr3:54539187-54539231                            | NM_001163570:78          | Exosc8        | INSIDE                 | 1.014                                                        | 0.654                          | 2447.94            | 1600.11            | 0.663                          | 1808.82            | 1199.16            |
| A_68_P32397416 | chrX:53984482-53984526                            | NM_010211:-459           | Fhl1          | PROMOTER               | 1.013                                                        | 2.128                          | 576.02             | 1226.04            | 2.155                          | 666.42             | 1436.46            |
| A_68_P32240057 | chrX:7339866-7339910                              | NM_001105196:102         | Tcfc3         | INSIDE                 | 1.013                                                        | 1.491                          | 1693.36            | 2525.06            | 1.511                          | 2302.24            | 3477.77            |
| A_68_P30580561 | chr16:18582686-18582730                           | NM_011532:4354           | Tbx1          | INSIDE                 | 1.013                                                        | 1.679                          | 786.32             | 1320.53            | 1.702                          | 691.26             | 1176.25            |
| A_68_P29296005 | chr13:106235083-106235127                         | NM_008308:1332           | Htr1a         | INSIDE                 | 1.013                                                        | 0.236                          | 2444.39            | 577.72             | 0.239                          | 1769.26            | 423.72             |
| A_68_P28158193 | chr11:116099596-116099640                         | NM_025276:-213           | Evpl          | PROMOTER               | 1.013                                                        | 1.820                          | 1032.49            | 1878.66            | 1.843                          | 796.11             | 1467.07            |
| A_68_P28151703 | chr11:115025252-115025296                         | NM_012030:620            | Slc9a3r1      | INSIDE                 | 1.013                                                        | 0.589                          | 1557.40            | 917.38             | 0.596                          | 1173.19            | 699.70             |
| A_68_P27643749 | chr11:22890683-22890727                           | NM_009837:112            | Cct4          | INSIDE                 | 1.013                                                        | 0.490                          | 1600.53            | 783.74             | 0.496                          | 1105.62            | 548.67             |
| A_68_P26897303 | chr9:123761167-123761211                          | NM_001110253:-168        | Fyco1         | PROMOTER               | 1.013                                                        | 0.197                          | 2838.21            | 559.70             | 0.200                          | 2202.61            | 439.89             |
| A_68_P26458361 | chr9:42705530-42705574                            | NM_175481:46902          | Grik4         | INSIDE                 | 1.013                                                        | 3.469                          | 2654.27            | 9207.88            | 3.513                          | 2427.58            | 8528.58            |
| A_68_P26013519 | chr8:85689979-85690023                            | NM_001111304:750         | Tbcl1d9       | INSIDE                 | 1.013                                                        | 0.427                          | 1439.12            | 614.17             | 0.432                          | 1138.77            | 492.31             |
| A_68_P25877023 | chr8:55163035-55163079                            | NM_009506:171            | Vegfc         | INSIDE                 | 1.013                                                        | 0.499                          | 2822.59            | 1407.19            | 0.505                          | 2235.19            | 1128.44            |

| ProbeName       | Target position of probe on CpG island microarray | TargetID           | GeneSymbol    | CpG island Description | Ratio of relative methylation (TiO <sub>2</sub> -NP/Vehicle) | Sham group                     |                    |                    | TiO <sub>2</sub> -H group      |                    |                    |
|-----------------|---------------------------------------------------|--------------------|---------------|------------------------|--------------------------------------------------------------|--------------------------------|--------------------|--------------------|--------------------------------|--------------------|--------------------|
|                 |                                                   |                    |               |                        |                                                              | Relative methylation (Cy5/Cy3) | Cy3 signal (Input) | Cy5 signal (MeDIP) | Relative methylation (Cy5/Cy3) | Cy3 signal (Input) | Cy5 signal (MeDIP) |
| A_68_P25285353  | chr7:91040923-91040967                            | NM_023403:435      | Mesdc2        | INSIDE                 | 1.013                                                        | 0.219                          | 3681.73            | 805.17             | 0.222                          | 2542.50            | 563.32             |
| A_68_P25184946  | chr7:73007817-73007861                            | NM_011048:817      | Peskb         | INSIDE                 | 1.013                                                        | 0.524                          | 1207.61            | 632.60             | 0.531                          | 896.42             | 475.89             |
| A_68_P24920736  | chr6:144996969-144997013                          | NM_001024468:342   | Beat1         | INSIDE                 | 1.013                                                        | 0.231                          | 3401.88            | 786.16             | 0.234                          | 2292.20            | 536.64             |
| A_68_P23970433  | chr5:108561687-108561731                          | NM_028876:-98      | Tmed5         | DIVERGENT_PROMOTER     | 1.013                                                        | 0.480                          | 1453.06            | 697.97             | 0.486                          | 1145.65            | 557.30             |
| A_68_P23440035  | chr4:155068628-155068672                          | NM_178699:200      | B930041F14Rik | INSIDE                 | 1.013                                                        | 2.393                          | 670.38             | 1603.97            | 2.424                          | 590.98             | 1432.46            |
| A_68_P23294682  | chr4:128735948-128735992                          | NM_029219:456      | Rnf19b        | INSIDE                 | 1.013                                                        | 0.475                          | 3856.25            | 1830.43            | 0.481                          | 2763.48            | 1329.24            |
| A_68_P21069043  | chr2:24817956-24818000                            | NM_026044:37       | Wdr85         | INSIDE                 | 1.013                                                        | 0.252                          | 2378.82            | 600.06             | 0.255                          | 1750.04            | 447.03             |
| A_68_P20828236  | chr1:173433692-173433736                          | NM_019484:106      | Refbp2        | INSIDE                 | 1.013                                                        | 3.937                          | 634.65             | 2498.44            | 3.987                          | 495.48             | 1975.47            |
| A_68_P32461573  | chrX:70474177-70474221                            | NM_007978:554      | F8a           | INSIDE                 | 1.012                                                        | 1.871                          | 605.63             | 1133.06            | 1.893                          | 728.61             | 1379.19            |
| A_68_P31124214  | chr17:28906962-28907006                           | NM_011950:723      | Mapk13        | INSIDE                 | 1.012                                                        | 0.596                          | 2166.45            | 1290.19            | 0.602                          | 1598.67            | 963.09             |
| A_68_P30348856  | chr15:76348296-76348340                           | NM_130893:4241     | Scrt1         | INSIDE                 | 1.012                                                        | 2.266                          | 586.33             | 1328.61            | 2.292                          | 553.92             | 1269.78            |
| A_68_P29143668  | chr13:74147651-74147695                           | NM_182839:806      | Tppp          | INSIDE                 | 1.012                                                        | 0.363                          | 2040.99            | 740.45             | 0.367                          | 1607.46            | 589.88             |
| A_68_P28143853  | chr11:113612913-113612957                         | NM_020006:-460     | Cdc42ep4      | PROMOTER               | 1.012                                                        | 0.350                          | 1414.62            | 495.67             | 0.355                          | 947.01             | 335.74             |
| A_68_P26290457  | chr9:8004110-8004154                              | NM_001171147:464   | Yap1          | INSIDE                 | 1.012                                                        | 0.372                          | 3277.57            | 1218.42            | 0.376                          | 2503.39            | 941.44             |
| A_68_P26170718  | chr8:114400399-114400443                          | NM_025781:155      | Tmem170       | INSIDE                 | 1.012                                                        | 0.601                          | 2923.74            | 1757.72            | 0.608                          | 2311.07            | 1405.55            |
| A_68_P24760448  | chr6:113554830-113554888                          | NM_133937:93       | 6720456B07Rik | INSIDE                 | 1.012                                                        | 0.439                          | 1367.40            | 599.73             | 0.444                          | 1153.90            | 512.41             |
| A_68_P24449225  | chr6:52175521-52175565                            | NM_010456:1827     | Hoxa9         | INSIDE                 | 1.012                                                        | 0.618                          | 2763.18            | 1708.53            | 0.626                          | 2053.40            | 1284.51            |
| A_68_P24192245  | chr5:151476526-151476570                          | NM_175310:147      | Pds5b         | INSIDE                 | 1.012                                                        | 0.312                          | 2577.40            | 803.34             | 0.315                          | 1900.76            | 599.55             |
| A_68_P24090316  | chr5:130175740-130175787                          | NM_172462:200      | Zfp11         | INSIDE                 | 1.012                                                        | 0.565                          | 2421.95            | 1369.31            | 0.572                          | 1880.71            | 1076.47            |
| A_68_P22149161  | chr3:54496698-54496742                            | NM_019995:-306     | Fam48a        | PROMOTER               | 1.012                                                        | 0.318                          | 1744.15            | 553.84             | 0.321                          | 1282.72            | 412.36             |
| A_68_P20938880  | chr1:193399417-193399461                          | NM_029766:-25      | Dtl           | DIVERGENT_PROMOTER     | 1.012                                                        | 0.236                          | 2294.26            | 540.84             | 0.239                          | 1673.25            | 399.25             |
| A_68_P29144942  | chr13:74345862-74345906                           | NM_177333:264      | Exoc3         | INSIDE                 | 1.011                                                        | 1.811                          | 769.63             | 1394.10            | 1.831                          | 705.65             | 1291.96            |
| A_68_P28703485  | chr12:105711191-105711235                         | NM_010351:234      | Gsc           | INSIDE                 | 1.011                                                        | 2.169                          | 850.08             | 1843.71            | 2.192                          | 676.61             | 1483.32            |
| A_68_P27924560  | chr11:74979095-74979139                           | NM_001098203:2538  | Hic1          | INSIDE                 | 1.011                                                        | 2.202                          | 422.38             | 930.28             | 2.226                          | 380.91             | 847.90             |
| A_68_P27797421  | chr11:51912713-51912757                           | NM_019411:409      | Ppp2ca        | INSIDE                 | 1.011                                                        | 1.370                          | 2596.45            | 3556.34            | 1.385                          | 2024.59            | 2803.52            |
| A_68_P26447511  | chr9:40965188-40965232                            | NM_176860:367      | Ubash3b       | INSIDE                 | 1.011                                                        | 0.520                          | 1472.65            | 765.96             | 0.526                          | 1035.47            | 544.56             |
| A_68_P250951523 | chr7:53050658-53050702                            | NM_001005511:11364 | Lmtk3         | INSIDE                 | 1.011                                                        | 4.630                          | 2296.01            | 10630.21           | 4.681                          | 1812.44            | 8483.54            |
| A_68_P25048708  | chr7:36103274-36103318                            | NM_026181:163      | Gpatch1       | INSIDE                 | 1.011                                                        | 0.469                          | 3176.12            | 1489.49            | 0.474                          | 2541.60            | 1204.74            |
| A_68_P23577314  | chr5:31554107-31554151                            | NM_027221:50       | Krtcap3       | INSIDE                 | 1.011                                                        | 0.459                          | 1799.91            | 826.75             | 0.464                          | 1550.11            | 719.54             |
| A_68_P22342939  | chr3:95032854-95032898                            | NM_001038708:3     | Cdc42se1      | INSIDE                 | 1.011                                                        | 0.316                          | 4229.53            | 1335.80            | 0.319                          | 3109.06            | 992.94             |
| A_68_P21621792  | chr2:128689765-128689810                          | NM_024237:120      | Fbln7         | INSIDE                 | 1.011                                                        | 0.387                          | 2396.72            | 926.70             | 0.391                          | 1743.51            | 681.33             |
| A_68_P21350019  | chr2:76244929-76244973                            | NM_145525:356      | Osbp16        | INSIDE                 | 1.011                                                        | 0.645                          | 2258.97            | 1455.98            | 0.652                          | 1906.53            | 1242.88            |
| A_68_P20970770  | chr2:4802809-4802853                              | NM_175400:221      | Septs1        | INSIDE                 | 1.011                                                        | 1.881                          | 567.20             | 1067.19            | 1.903                          | 512.37             | 975.02             |
| A_68_P20740064  | chr1:157659559-157659603                          | NM_001024945:449   | Qsox1         | INSIDE                 | 1.011                                                        | 0.287                          | 3850.38            | 1104.57            | 0.290                          | 3060.00            | 887.50             |
| A_68_P20352131  | chr1:75121569-75121613                            | NM_029342:210      | Nhej1         | INSIDE                 | 1.011                                                        | 0.392                          | 1212.69            | 475.76             | 0.396                          | 986.55             | 391.11             |
| A_68_P32672216  | chrX:131010833-131010877                          | NM_028958:175      | Taf7l         | INSIDE                 | 1.010                                                        | 2.632                          | 399.92             | 1052.45            | 2.658                          | 572.05             | 1520.26            |
| A_68_P31985626  | chr19:17468432-17468476                           | NM_019437:-78      | Rfk           | PROMOTER               | 1.010                                                        | 0.216                          | 3786.21            | 819.09             | 0.219                          | 2962.79            | 647.65             |
| A_68_P30671438  | A_68_P30671438                                    |                    | Unknown       | Unknown                | 1.010                                                        | 1.626                          | 1275.33            | 2073.27            | 1.642                          | 1049.43            | 1723.13            |
| A_68_P30489324  | chr15:100883675-100883719                         | NM_011323:116995   | Scn8a         | DOWNSTREAM             | 1.010                                                        | 0.501                          | 2025.56            | 1015.39            | 0.506                          | 1576.64            | 798.43             |
| A_68_P30339170  | chr15:74551517-74551561                           | NM_198607:-125     | 4930572J05Rik | PROMOTER               | 1.010                                                        | 0.596                          | 1459.57            | 869.98             | 0.602                          | 1193.59            | 718.79             |
| A_68_P29989753  | chr15:6659068-6659112                             | NM_030168:710      | Rictor        | INSIDE                 | 1.010                                                        | 0.662                          | 2462.66            | 1630.02            | 0.669                          | 1760.70            | 1177.52            |
| A_68_P28457453  | chr12:57636766-57636810                           | NM_001146198:-695  | Nkx2-1        | PROMOTER               | 1.010                                                        | 2.110                          | 6444.77            | 13595.59           | 2.130                          | 5075.26            | 10809.48           |
| A_68_P28095285  | chr11:105153865-105153909                         | NM_008626:-73      | Mre2          | PROMOTER               | 1.010                                                        | 4.489                          | 3177.38            | 14263.75           | 4.536                          | 2455.98            | 11140.10           |
| A_68_P28072389  | chr11:101035495-101035539                         | NM_007721:1241     | Ccr10         | INSIDE                 | 1.010                                                        | 0.569                          | 2272.83            | 1292.12            | 0.574                          | 1433.27            | 822.90             |
| A_68_P27898219  | chr11:69780262-69780306                           | NM_016887:1362     | Cldn7         | INSIDE                 | 1.010                                                        | 0.429                          | 1208.24            | 518.41             | 0.433                          | 1039.41            | 450.55             |
| A_68_P27340039  | chr10:90564881-90564925                           | NM_027078:19119    | Ikbip         | INSIDE                 | 1.010                                                        | 3.860                          | 1066.31            | 4116.32            | 3.899                          | 804.26             | 3135.53            |
| A_68_P25504680  | chr7:134376542-134376586                          | NR_030674:80       | Gm4532        | INSIDE                 | 1.010                                                        | 0.570                          | 1280.90            | 730.35             | 0.576                          | 994.93             | 572.73             |
| A_68_P24325497  | chr6:29222598-29222642                            | NM_023516:-5       | 2310016C08Rik | PROMOTER               | 1.010                                                        | 0.209                          | 2103.16            | 440.04             | 0.211                          | 1838.71            | 388.74             |
| A_68_P23374050  | chr4:142802510-142802554                          | NM_001081355:80    | Prdm2         | INSIDE                 | 1.010                                                        | 0.547                          | 1739.47            | 950.93             | 0.552                          | 1416.03            | 782.13             |
| A_68_P23183551  | chr4:105989077-105989121                          | NM_183225:281      | Usp24         | INSIDE                 | 1.010                                                        | 31.884                         | 726.69             | 23169.78           | 32.198                         | 797.26             | 25670.51           |
| A_68_P22774760  | chr4:21703216-21703260                            | NM_152825:-178     | Usp45         | DIVERGENT_PROMOTER     | 1.010                                                        | 0.437                          | 2650.41            | 1158.69            | 0.442                          | 2081.94            | 919.58             |
| A_68_P22582960  | chr3:140874546-140874590                          | NM_008811:751      | Pdha2         | INSIDE                 | 1.010                                                        | 2.026                          | 1214.69            | 2460.73            | 2.047                          | 1037.65            | 2123.79            |
| A_68_P22029171  | chr3:30494182-30494226                            | NM_029690:4588     | Arpm1         | DOWNSTREAM             | 1.010                                                        | 0.293                          | 1689.58            | 494.85             | 0.296                          | 1381.33            | 408.44             |
| A_68_P21874750  | chr2:174153901-174153945                          | NM_001077510:-1667 | Gnas          | PROMOTER               | 1.010                                                        | 2.010                          | 1632.32            | 3280.42            | 2.030                          | 1316.80            | 2673.09            |
| A_68_P21835852  | chr2:167329260-167329304                          | NM_030743:11138    | Rnf14         | INSIDE                 | 1.010                                                        | 0.584                          | 1315.79            | 767.81             | 0.589                          | 1011.02            | 595.77             |
| A_68_P21328886  | chr2:72818646-72818690                            | NM_001018042:-165  | Sp3           | PROMOTER               | 1.010                                                        | 1.855                          | 777.04             | 1441.67            | 1.873                          | 586.13             | 1097.98            |
| A_68_P31252966  | chr17:56095674-56095719                           | NM_015766:3651     | Ebi3          | INSIDE                 | 1.009                                                        | 2.863                          | 2427.28            | 6949.35            | 2.889                          | 1853.55            | 5354.73            |
| A_68_P31157364  | chr17:35202217-35202261                           | NR_001462:857      | G6b           | INSIDE                 | 1.009                                                        | 0.335                          | 2812.42            | 941.24             | 0.338                          | 2160.99            | 729.97             |
| A_68_P29508104  | chr14:31638725-31638769                           | NM_028839:-33      | Tmem110       | PROMOTER               | 1.009                                                        | 8.097                          | 1911.74            | 15479.32           | 8.173                          | 1743.01            | 14245.87           |
| A_68_P25016925  | chr7:28146852-28146896                            | NM_001199235:32651 | Spnb4         | INSIDE                 | 1.009                                                        | 0.454                          | 1888.62            | 857.69             | 0.458                          | 1612.29            | 738.65             |
| A_68_P24104838  | chr5:133017511-133017555                          | NM_177047:681      | Auts2         | INSIDE                 | 1.009                                                        | 0.565                          | 1063.74            | 601.11             | 0.570                          | 933.06             | 533.04             |
| A_68_P23428038  | chr4:153331126-153331170                          | NM_001163019:-197  | A430005L14Rik | PROMOTER               | 1.009                                                        | 0.465                          | 1161.54            | 540.46             | 0.469                          | 908.56             | 426.53             |
| A_68_P23252013  | chr4:120242605-120242649                          | NM_016748:255      | Ctps          | INSIDE                 | 1.009                                                        | 1.805                          | 729.31             | 1316.57            | 1.821                          | 692.02             | 1260.47            |
| A_68_P21150016  | chr2:38567183-38567227                            | NM_139051:2858     | Nr5a1         | INSIDE                 | 1.009                                                        | 0.273                          | 1841.31            | 502.01             | 0.275                          | 1309.77            | 360.41             |
| A_68_P21113954  | chr2:32069353-32069397                            | NM_001159634:62707 | Prrc2b        | INSIDE                 | 1.009                                                        | 1.537                          | 1273.22            | 1956.52            | 1.550                          | 1053.04            | 1632.72            |

| ProbeName      | Target position of probe on CpG island microarray | TargetID              | GeneSymbol    | CpG island Description | Ratio of relative methylation (TiO <sub>2</sub> -NP/Vehicle) | Sham group                     |                    |                    | TiO <sub>2</sub> -H group      |                    |                    |
|----------------|---------------------------------------------------|-----------------------|---------------|------------------------|--------------------------------------------------------------|--------------------------------|--------------------|--------------------|--------------------------------|--------------------|--------------------|
|                |                                                   |                       |               |                        |                                                              | Relative methylation (Cy5/Cy3) | Cy3 signal (Input) | Cy5 signal (MeDIP) | Relative methylation (Cy5/Cy3) | Cy3 signal (Input) | Cy5 signal (MeDIP) |
| A_68_P33012182 | chr9_random:57481-57526                           | NR_027950:2811        | 4930526115Rik | DOWNSTREAM             | 1.008                                                        | 3.166                          | 1535.95            | 4863.29            | 3.193                          | 1052.56            | 3361.02            |
| A_68_P31156012 | chr17:34974444-34974488                           | NM_001163770:503      | Dom3z         | INSIDE                 | 1.008                                                        | 0.316                          | 1770.68            | 559.23             | 0.318                          | 1359.22            | 432.77             |
| A_68_P30425919 | chr15:89388600-89388644                           | NM_021423:58335       | Shank3        | INSIDE                 | 1.008                                                        | 0.453                          | 2433.33            | 1101.64            | 0.456                          | 1688.06            | 770.40             |
| A_68_P29604236 | chr14:52626490-52626534                           | NM_027248:13896       | Zip219        | INSIDE                 | 1.008                                                        | 2.849                          | 1105.50            | 3149.39            | 2.872                          | 1019.27            | 2927.14            |
| A_68_P29578141 | chr14:47380448-47380492                           | NM_028222:255         | Cdkn3         | INSIDE                 | 1.008                                                        | 0.326                          | 1457.87            | 475.26             | 0.329                          | 1262.91            | 415.15             |
| A_68_P29269304 | chr13:101386895-101386939                         | NM_178410:17          | Marveld2      | PROMOTER               | 1.008                                                        | 2.036                          | 1348.15            | 2744.96            | 2.052                          | 1253.87            | 2573.39            |
| A_68_P29041278 | chr13:53075844-53075888                           | NM_017373:542         | Nfil3         | INSIDE                 | 1.008                                                        | 0.139                          | 6009.06            | 836.04             | 0.140                          | 3705.33            | 519.40             |
| A_68_P25972614 | chr8:77737372-77737416                            | NM_029182:448         | Rasd2         | PROMOTER               | 1.008                                                        | 0.518                          | 1317.57            | 682.06             | 0.522                          | 1057.62            | 551.67             |
| A_68_P25954772 | chr8:73416640-73416684                            | NM_053248:6           | Slc5a5        | PROMOTER               | 1.008                                                        | 0.335                          | 1549.64            | 519.22             | 0.338                          | 1235.85            | 417.41             |
| A_68_P24045429 | chr5:122043432-122043476                          | NM_009656:379         | Aldh2         | INSIDE                 | 1.008                                                        | 1.719                          | 978.69             | 1682.42            | 1.733                          | 820.05             | 1421.31            |
| A_68_P24002066 | chr5:114577441-114577485                          | NM_175016:723         | Alkbh2        | INSIDE                 | 1.008                                                        | 0.232                          | 1997.09            | 463.33             | 0.234                          | 1406.65            | 328.89             |
| A_68_P23996384 | chr5:113567876-113567920                          | NM_172884:24435       | 2900026A02Rik | INSIDE                 | 1.008                                                        | 0.435                          | 1453.48            | 631.57             | 0.438                          | 1173.62            | 514.20             |
| A_68_P21717104 | chr2:146048487-146048531                          | NM_016889:776         | Insm1         | INSIDE                 | 1.008                                                        | 1.907                          | 715.68             | 1364.88            | 1.923                          | 566.20             | 1088.68            |
| A_68_P21646221 | chr2:133378682-133378726                          | NM_007553:230         | Bmp2          | PROMOTER               | 1.008                                                        | 2.527                          | 1939.66            | 4900.77            | 2.546                          | 1654.18            | 4212.10            |
| A_68_P20184678 | chr1:42755116-42755160                            | NM_008900:1148        | Pou3f3        | INSIDE                 | 1.008                                                        | 2.910                          | 1084.28            | 3155.59            | 2.935                          | 913.79             | 2681.83            |
| A_68_P31165741 | chr17:36973900-36973945                           | NM_001025599:-163     | Trim26        | PROMOTER               | 1.007                                                        | 0.351                          | 4901.61            | 1722.91            | 0.354                          | 3316.83            | 1173.95            |
| A_68_P30422534 | chr15:89330339-89330383                           | NM_021423:73          | Shank3        | INSIDE                 | 1.007                                                        | 0.476                          | 919.03             | 437.00             | 0.479                          | 763.93             | 365.97             |
| A_68_P29469008 | chr14:24823022-24823066                           | NM_010610:383         | Kcnma1        | INSIDE                 | 1.007                                                        | 0.270                          | 2104.74            | 568.49             | 0.272                          | 1541.48            | 419.45             |
| A_68_P29116718 | chr13:69749922-69749966                           | NM_175283:397         | Srd5a1        | INSIDE                 | 1.007                                                        | 0.477                          | 1909.32            | 910.42             | 0.480                          | 1611.15            | 774.00             |
| A_68_P28162003 | chr11:116780529-116780573                         | NM_172948:374         | Mgat5b        | INSIDE                 | 1.007                                                        | 2.844                          | 1636.34            | 441.26             | 2.865                          | 441.26             | 1264.27            |
| A_68_P28099479 | chr11:105946314-105946358                         | NM_011947:121         | Map3k3        | INSIDE                 | 1.007                                                        | 1.407                          | 1742.12            | 2450.59            | 1.416                          | 1471.37            | 2083.28            |
| A_68_P27887970 | chr11:68026508-68026552                           | NM_008744:173798      | Ntn1          | INSIDE                 | 1.007                                                        | 2.754                          | 1383.44            | 3810.25            | 2.773                          | 1037.88            | 2877.67            |
| A_68_P27513158 | chr10:122634206-122634250                         | NM_027604:249         | Usp15         | PROMOTER               | 1.007                                                        | 0.243                          | 4517.56            | 1097.95            | 0.245                          | 3293.31            | 805.91             |
| A_68_P24921911 | chr6:145197899-145197943                          | NM_021284:831         | Kras          | INSIDE                 | 1.007                                                        | 0.288                          | 5302.55            | 1528.32            | 0.290                          | 3574.03            | 1037.07            |
| A_68_P24022910 | chr5:118292126-118292170                          | ENSMUST00000142742:-4 |               | PROMOTER               | 1.007                                                        | 0.416                          | 1832.99            | 762.42             | 0.419                          | 1453.40            | 609.00             |
| A_68_P23466247 | chr5:8056554-8056598                              | NM_001080974:35       | Sri           | INSIDE                 | 1.007                                                        | 4.418                          | 4355.85            | 19245.03           | 4.448                          | 3673.96            | 16341.85           |
| A_68_P22168174 | chr3:58220683-58220727                            | NM_001081229:1094     | Tsc22d2       | INSIDE                 | 1.007                                                        | 0.325                          | 1722.22            | 559.88             | 0.327                          | 1308.40            | 428.31             |
| A_68_P20970772 | chr2:4803061-4803105                              | NM_175400:473         | Septis1       | INSIDE                 | 1.007                                                        | 1.556                          | 1200.82            | 1868.05            | 1.566                          | 1013.27            | 1586.81            |
| A_68_P20877471 | chr1:182656470-182656514                          | NM_133225:319         | Acbd3         | INSIDE                 | 1.007                                                        | 0.298                          | 2336.77            | 696.47             | 0.300                          | 1712.18            | 513.65             |
| A_68_P20644880 | chr1:138157179-138157223                          | NM_001101516:250      | Gpr25         | INSIDE                 | 1.007                                                        | 2.383                          | 553.14             | 1318.38            | 2.401                          | 439.18             | 1054.28            |
| A_68_P33007165 | chr8:121970673-121970717                          | NM_054095:76          | Necab2        | INSIDE                 | 1.006                                                        | 0.668                          | 1963.12            | 1311.43            | 0.672                          | 1601.60            | 1076.07            |
| A_68_P32142306 | chr19:46221925-46221969                           | NM_008852:869         | Pitx3         | INSIDE                 | 1.006                                                        | 0.126                          | 4783.77            | 601.30             | 0.126                          | 3345.45            | 423.16             |
| A_68_P29437783 | chr14:19103060-19103104                           | NM_025586:418         | Rpl15         | INSIDE                 | 1.006                                                        | 0.315                          | 1585.60            | 499.67             | 0.317                          | 1267.81            | 401.81             |
| A_68_P29287625 | chr13:104710556-104710600                         | NM_001005868:16       | Erbp2ip       | INSIDE                 | 1.006                                                        | 2.623                          | 644.06             | 1689.13            | 2.639                          | 518.24             | 1367.38            |
| A_68_P29269009 | chr13:101322202-101322246                         | NM_008756:229         | Ocln          | INSIDE                 | 1.006                                                        | 0.640                          | 1917.80            | 1227.10            | 0.644                          | 1493.41            | 961.13             |
| A_68_P28612727 | chr12:88224458-88224502                           | NM_145836:1284        | 6430527G18Rik | INSIDE                 | 1.006                                                        | 1.669                          | 1093.13            | 1824.38            | 1.678                          | 892.05             | 1496.98            |
| A_68_P28190288 | chr11:121249326-121249370                         | NM_139147:217         | Rab40b        | INSIDE                 | 1.006                                                        | 0.504                          | 1078.93            | 543.71             | 0.507                          | 925.13             | 469.12             |
| A_68_P27898423 | chr11:69814128-69814172                           | NM_007888:23          | Dvl2          | INSIDE                 | 1.006                                                        | 0.193                          | 2865.33            | 552.81             | 0.194                          | 1842.74            | 357.73             |
| A_68_P27795021 | chr11:51449266-51449310                           | NM_025346:110         | Rmnd5b        | INSIDE                 | 1.006                                                        | 3.976                          | 662.15             | 2632.55            | 4.001                          | 602.45             | 2410.31            |
| A_68_P26504100 | chr9:50336652-50336696                            | NM_011220:72          | Pts           | INSIDE                 | 1.006                                                        | 3.180                          | 546.21             | 1736.84            | 3.198                          | 491.97             | 1573.45            |
| A_68_P26240715 | chr8:126178067-126178111                          | NM_133955:260         | Rhou          | INSIDE                 | 1.006                                                        | 0.638                          | 2132.29            | 1361.30            | 0.642                          | 1470.09            | 943.85             |
| A_68_P26234572 | chr8:125135779-125135823                          | NM_021502:275         | Trappc2l      | INSIDE                 | 1.006                                                        | 0.387                          | 1153.02            | 446.24             | 0.389                          | 907.91             | 353.41             |
| A_68_P25957204 | chr8:74031827-74031871                            | NM_032398:3820        | Plvap         | INSIDE                 | 1.006                                                        | 0.479                          | 2071.05            | 992.41             | 0.482                          | 1612.23            | 776.85             |
| A_68_P25504738 | chr7:134387769-134387813                          | NM_177362:249         | Zip771        | PROMOTER               | 1.006                                                        | 0.354                          | 3800.91            | 1345.04            | 0.356                          | 2949.86            | 1050.46            |
| A_68_P25044994 | chr7:35460266-35460310                            | NM_175140:137442      | Chst8         | INSIDE                 | 1.006                                                        | 0.401                          | 1391.58            | 557.53             | 0.403                          | 995.97             | 401.37             |
| A_68_P24540585 | chr6:72184350-72184394                            | NM_153778:1199        | Atoh8         | INSIDE                 | 1.006                                                        | 0.255                          | 2240.42            | 570.64             | 0.256                          | 1587.63            | 407.00             |
| A_68_P24423938 | chr6:47545113-47545157                            | NM_001146689:-105     | Ezh2          | PROMOTER               | 1.006                                                        | 1.860                          | 588.89             | 1095.39            | 1.871                          | 510.54             | 955.25             |
| A_68_P24307329 | chr6:25639868-25639912                            | NM_010338:90          | Gpr37         | INSIDE                 | 1.006                                                        | 0.657                          | 2379.07            | 1563.17            | 0.661                          | 1856.07            | 1226.84            |
| A_68_P24156267 | chr5:144134774-144134818                          | NM_133355:9210        | Grid2ip       | INSIDE                 | 1.006                                                        | 0.483                          | 1079.15            | 521.04             | 0.486                          | 874.66             | 424.94             |
| A_68_P24112795 | chr5:135164074-135164118                          | NM_010717:364         | Limk1         | INSIDE                 | 1.006                                                        | 0.389                          | 5577.89            | 2172.14            | 0.392                          | 4187.86            | 1639.98            |
| A_68_P23896677 | chr5:93327277-93327321                            | NM_001077596:275      | Shroom3       | INSIDE                 | 1.006                                                        | 0.532                          | 1779.37            | 946.63             | 0.535                          | 1492.50            | 799.17             |
| A_68_P23753092 | chr5:65213185-65213229                            | NM_008453:18445       | Klf3          | INSIDE                 | 1.006                                                        | 2.244                          | 398.31             | 893.92             | 2.259                          | 355.65             | 803.32             |
| A_68_P23262156 | chr4:123019628-123019672                          | NM_007558:396         | Bmp8a         | INSIDE                 | 1.006                                                        | 0.307                          | 2209.01            | 677.34             | 0.309                          | 1493.80            | 460.89             |
| A_68_P21747682 | chr2:151931567-151931611                          | NM_029688:123         | Srxn1         | INSIDE                 | 1.006                                                        | 0.479                          | 2220.46            | 1064.14            | 0.482                          | 1778.45            | 857.14             |
| A_68_P21425684 | chr2:91803378-91803422                            | NM_138306:320         | Dgkz          | INSIDE                 | 1.006                                                        | 0.330                          | 1566.57            | 517.34             | 0.332                          | 1323.65            | 439.71             |
| A_68_P33005881 | A_68_P33005881                                    |                       | Unknown       |                        | 1.005                                                        | 5.515                          | 240.37             | 1325.54            | 5.540                          | 1860.67            | 1000.97            |
| A_68_P32252893 | chrX:10295189-10295233                            | NM_001166635:720      | Mid1ip1       | INSIDE                 | 1.005                                                        | 2.859                          | 311.44             | 890.50             | 2.873                          | 349.36             | 1003.65            |
| A_68_P30642392 | chr16:30550884-30550928                           | NM_172614:242         | Tmem44        | PROMOTER               | 1.005                                                        | 0.426                          | 2338.55            | 996.13             | 0.428                          | 1800.27            | 770.61             |
| A_68_P30589275 | chr16:20733601-20733645                           | NM_009893:423         | Chrd          | INSIDE                 | 1.005                                                        | 0.317                          | 2007.06            | 636.09             | 0.319                          | 1500.96            | 478.15             |
| A_68_P30361556 | chr15:78502582-78502626                           | NM_183141:45939       | Elf2          | INSIDE                 | 1.005                                                        | 1.482                          | 1587.79            | 2353.16            | 1.489                          | 1353.76            | 2015.36            |
| A_68_P29246775 | chr13:97312510-97312554                           | NM_012048:92          | Polk          | DIVERGENT_PROMOTER     | 1.005                                                        | 0.366                          | 1248.01            | 457.18             | 0.368                          | 1068.91            | 393.38             |
| A_68_P28547082 | chr12:76277823-76277867                           | NM_172805:475         | Kcnh5         | INSIDE                 | 1.005                                                        | 4.216                          | 961.07             | 4051.93            | 4.238                          | 823.53             | 3489.80            |
| A_68_P27804916 | chr11:53280008-53280053                           | NM_027917:9324        | Shroom1       | INSIDE                 | 1.005                                                        | 0.272                          | 2562.81            | 696.28             | 0.273                          | 1950.58            | 532.77             |
| A_68_P27212539 | chr10:67011459-67011503                           | NM_001005419:223      | Ado           | INSIDE                 | 1.005                                                        | 0.293                          | 2589.56            | 759.58             | 0.295                          | 2037.64            | 600.86             |
| A_68_P26035027 | chr8:89996039-89996083                            | NM_019626:431         | Cbln1         | INSIDE                 | 1.005                                                        | 0.213                          | 2705.22            | 574.93             | 0.214                          | 2146.41            | 458.57             |

| ProbeName      | Target position of probe on CpG island microarray | TargetID               | GeneSymbol | CpG island Description | Ratio of relative methylation (TiO <sub>2</sub> -NP/Vehicle) | Sham group                     |                    |                    | TiO <sub>2</sub> -H group      |                    |                    |
|----------------|---------------------------------------------------|------------------------|------------|------------------------|--------------------------------------------------------------|--------------------------------|--------------------|--------------------|--------------------------------|--------------------|--------------------|
|                |                                                   |                        |            |                        |                                                              | Relative methylation (Cy5/Cy3) | Cy3 signal (Input) | Cy5 signal (MeDIP) | Relative methylation (Cy5/Cy3) | Cy3 signal (Input) | Cy5 signal (MeDIP) |
| A_68_P23320948 | chr4:133638061-133638105                          | NM_001162970:13716     | Aim1l      | INSIDE                 | 1.005                                                        | 0.417                          | 1344.08            | 560.99             | 0.419                          | 802.65             | 336.59             |
| A_68_P22525062 | chr3:135101824-135101868                          | NM_025356:124          | Ube2d3     | INSIDE                 | 1.005                                                        | 0.619                          | 1820.40            | 1127.38            | 0.622                          | 1472.43            | 916.57             |
| A_68_P21727905 | chr2:147870580-147870624                          | NM_010446:2103         | Foxa2      | INSIDE                 | 1.005                                                        | 0.074                          | 8787.13            | 651.90             | 0.075                          | 5901.05            | 439.87             |
| A_68_P21477087 | chr2:102290962-102291006                          | NM_010218:965          | Fjx1       | INSIDE                 | 1.005                                                        | 1.719                          | 1286.70            | 2212.12            | 1.728                          | 1021.27            | 1764.53            |
| A_68_P21229090 | chr2:54288809-54288853                            | NM_173030:33           | Galnt13    | INSIDE                 | 1.005                                                        | 0.257                          | 2384.79            | 612.45             | 0.258                          | 1732.47            | 447.36             |
| A_68_P20599496 | chr1:130141494-130141539                          | NM_026390:759          | Ubxn4      | INSIDE                 | 1.005                                                        | 0.322                          | 1652.25            | 531.48             | 0.323                          | 1302.20            | 420.86             |
| A_68_P32233079 | chrX:5659147-5659194                              | NM_001033211:1368      | AU022751   | INSIDE                 | 1.004                                                        | 2.260                          | 435.06             | 983.15             | 2.268                          | 567.42             | 1287.04            |
| A_68_P30777939 | chr16:55822496-55822540                           | NM_001159394:-267      | Nfkbiz     | PROMOTER               | 1.004                                                        | 2.237                          | 854.70             | 1911.95            | 2.245                          | 875.99             | 1966.87            |
| A_68_P29941714 | chr14:119322290-119322334                         | NM_025943:77           | Dzip1      | INSIDE                 | 1.004                                                        | 1.768                          | 700.11             | 1237.73            | 1.776                          | 599.46             | 1064.44            |
| A_68_P29508896 | chr14:31764964-31765008                           | NM_011849:313          | Nek4       | INSIDE                 | 1.004                                                        | 0.525                          | 1219.19            | 639.92             | 0.527                          | 1094.02            | 576.71             |
| A_68_P28925133 | chr13:31902908-31902952                           | NM_008592:4416         | Foxc1      | DOWNSTREAM             | 1.004                                                        | 0.434                          | 1011.61            | 439.08             | 0.436                          | 826.38             | 360.23             |
| A_68_P27894856 | chr11:69213335-69213379                           | NM_001017426:13821     | Kdm6b      | INSIDE                 | 1.004                                                        | 2.039                          | 1705.78            | 3478.85            | 2.048                          | 1598.43            | 3274.02            |
| A_68_P27503061 | chr10:120802012-120802056                         | NM_029364:-111         | Gns        | PROMOTER               | 1.004                                                        | 0.555                          | 1129.23            | 626.64             | 0.557                          | 976.47             | 543.89             |
| A_68_P27286215 | chr10:80363124-80363168                           | NM_013895:568          | Timm13     | INSIDE                 | 1.004                                                        | 0.706                          | 6090.60            | 4298.27            | 0.708                          | 4453.43            | 3154.06            |
| A_68_P27171226 | chr10:59342593-59342637                           | NM_019965:276          | Dnajb12    | INSIDE                 | 1.004                                                        | 0.279                          | 5496.14            | 1533.92            | 0.280                          | 4060.96            | 1137.37            |
| A_68_P26372311 | chr9:26563473-26563520                            | NM_029792:4350         | B3gat1     | INSIDE                 | 1.004                                                        | 2.493                          | 1356.92            | 3382.48            | 2.502                          | 812.09             | 2032.05            |
| A_68_P26136321 | chr8:108378956-108379000                          | NM_021513:-24          | Thap11     | DIVERGENT_PROMOTER     | 1.004                                                        | 0.557                          | 2118.48            | 1179.04            | 0.559                          | 1761.78            | 984.81             |
| A_68_P25601084 | chr7:150646850-150646894                          | NM_001161624:83        | Cdkn1c     | INSIDE                 | 1.004                                                        | 2.386                          | 1321.67            | 3153.96            | 2.395                          | 1107.09            | 2651.77            |
| A_68_P25378793 | chr7:109590580-109590624                          | NM_009103:394          | Rrm1       | INSIDE                 | 1.004                                                        | 0.253                          | 6626.86            | 1673.47            | 0.254                          | 5353.68            | 1357.99            |
| A_68_P24693486 | chr6:100620755-100620799                          | NM_181590:375          | Shq1       | INSIDE                 | 1.004                                                        | 0.473                          | 1262.14            | 596.46             | 0.474                          | 971.89             | 461.03             |
| A_68_P24600269 | chr6:84534408-84534452                            | NM_175475:9374         | Cyp26b1    | INSIDE                 | 1.004                                                        | 0.524                          | 1120.07            | 587.18             | 0.527                          | 833.57             | 438.88             |
| A_68_P21744414 | chr2:151368303-151368347                          | NM_008019:90           | Fkbp1a     | INSIDE                 | 1.004                                                        | 0.426                          | 2275.89            | 968.91             | 0.427                          | 1664.84            | 711.65             |
| A_68_P21041600 | chr2:18722106-18722150                            | AK018938:468           |            | PROMOTER               | 1.004                                                        | 0.549                          | 1133.97            | 622.30             | 0.551                          | 929.71             | 512.19             |
| A_68_P20472152 | chr1:99557742-99557786                            | NM_133825:831          | D1Ert622c  | INSIDE                 | 1.004                                                        | 1.702                          | 952.00             | 1619.99            | 1.708                          | 820.43             | 1401.00            |
| A_68_P31862860 | chr18:80389507-80389558                           | NM_199197:7826         | Rbfa       | INSIDE                 | 1.003                                                        | 2.117                          | 673.01             | 1424.51            | 2.123                          | 487.63             | 1035.14            |
| A_68_P31412117 | chr17:86087251-86087295                           | NM_011380:322          | Six2       | INSIDE                 | 1.003                                                        | 2.369                          | 530.47             | 1256.59            | 2.375                          | 514.30             | 1221.34            |
| A_68_P31106320 | chr17:25933511-25933555                           | NM_133719:458          | Metn       | INSIDE                 | 1.003                                                        | 0.300                          | 1574.94            | 472.52             | 0.301                          | 1181.63            | 355.66             |
| A_68_P29622464 | chr14:56983521-56983565                           | NM_138652:-362         | Atp12a     | PROMOTER               | 1.003                                                        | 0.440                          | 1025.20            | 450.81             | 0.441                          | 765.22             | 337.53             |
| A_68_P28610310 | chr12:87811236-87811280                           | NM_011934:48665        | Esrrb      | INSIDE                 | 1.003                                                        | 2.938                          | 1144.68            | 3363.08            | 2.948                          | 1005.37            | 2964.07            |
| A_68_P27926119 | chr11:75258911-75258955                           | NM_138950:9287         | Wdr81      | INSIDE                 | 1.003                                                        | 2.076                          | 2017.37            | 4188.30            | 2.082                          | 1623.14            | 3379.25            |
| A_68_P25732728 | chr8:28338295-28338339                            | NM_013462:1744         | Adrb3      | INSIDE                 | 1.003                                                        | 0.220                          | 6115.21            | 1343.81            | 0.220                          | 4014.50            | 884.79             |
| A_68_P24948001 | chr7:4103164-4103208                              | NM_021454:13115        | Cdc42ep5   | INSIDE                 | 1.003                                                        | 0.418                          | 1456.76            | 609.54             | 0.420                          | 1077.69            | 452.31             |
| A_68_P24793354 | chr6:119430660-119430704                          | NM_133940:997          | Fbxl14     | INSIDE                 | 1.003                                                        | 1.775                          | 1341.49            | 2380.75            | 1.780                          | 1121.95            | 1996.54            |
| A_68_P23352770 | chr4:139130352-139130396                          | NM_001205173:-260      | Ifi62      | PROMOTER               | 1.003                                                        | 0.169                          | 5400.05            | 910.41             | 0.169                          | 3645.52            | 616.64             |
| A_68_P23232777 | chr4:116828074-116828118                          | NR_028524:-917         | Snord38a   | PROMOTER               | 1.003                                                        | 0.445                          | 1116.16            | 497.16             | 0.447                          | 852.56             | 380.78             |
| A_68_P22522353 | chr3:129534614-129534673                          | NM_026578:-329         | Gar1       | DIVERGENT_PROMOTER     | 1.003                                                        | 0.320                          | 2292.14            | 732.42             | 0.320                          | 1504.82            | 482.18             |
| A_68_P22518746 | chr3:128917465-128917509                          | NM_001042502:632       | Pitx2      | INSIDE                 | 1.003                                                        | 0.385                          | 1492.26            | 575.07             | 0.386                          | 1142.26            | 441.46             |
| A_68_P21831917 | chr2:166619198-166619242                          | NM_023815:-46          | Trp53rk    | PROMOTER               | 1.003                                                        | 0.512                          | 2309.32            | 1181.64            | 0.513                          | 1718.12            | 882.17             |
| A_68_P21319205 | chr2:71227112-71227156                            | NM_026115:-182         | Hat1       | PROMOTER               | 1.003                                                        | 0.492                          | 1898.35            | 933.83             | 0.493                          | 1733.55            | 854.90             |
| A_68_P20969133 | chr2:4524944-4524988                              | NM_001177844:44167     | Fmd4a      | INSIDE                 | 1.003                                                        | 1.801                          | 802.38             | 1445.40            | 1.807                          | 621.65             | 1123.09            |
| A_68_P32767190 | chrX:154036239-154036283                          | NM_172307:387          | Mbtps2     | INSIDE                 | 1.002                                                        | 1.727                          | 405.71             | 700.74             | 1.731                          | 622.45             | 1077.73            |
| A_68_P32559512 | chrX:97624640-97624684                            | NM_001163191:311       | Otud6a     | INSIDE                 | 1.002                                                        | 2.189                          | 1582.61            | 3464.84            | 2.193                          | 2319.96            | 5086.92            |
| A_68_P32415799 | chrX:58145248-58145292                            | NM_009237:1335         | Sox3       | INSIDE                 | 1.002                                                        | 1.542                          | 1042.81            | 1607.85            | 1.544                          | 1554.15            | 2400.18            |
| A_68_P30281413 | chr15:64213921-64213965                           | NM_010026:539          | Asap1      | INSIDE                 | 1.002                                                        | 0.535                          | 1543.87            | 826.12             | 0.536                          | 1260.27            | 675.63             |
| A_68_P29616398 | chr14:55732626-55732670                           | NM_177049:3124         | Jpb4       | INSIDE                 | 1.002                                                        | 2.323                          | 1050.42            | 2440.33            | 2.327                          | 866.59             | 2016.45            |
| A_68_P29047197 | chr13:54151010-54151054                           | NM_010076:-5           | Drd1a      | PROMOTER               | 1.002                                                        | 0.432                          | 2103.86            | 909.10             | 0.433                          | 1612.01            | 698.18             |
| A_68_P28054691 | chr11:98011236-98011280                           | NM_028149:-328         | Fbxl20     | PROMOTER               | 1.002                                                        | 0.495                          | 1936.24            | 958.75             | 0.496                          | 1455.21            | 721.74             |
| A_68_P26816016 | chr9:108564748-108564792                          | NM_020520:342          | Slc25a20   | INSIDE                 | 1.002                                                        | 2.982                          | 614.01             | 1830.95            | 2.988                          | 550.94             | 1646.19            |
| A_68_P26629704 | chr9:72655004-72655048                            | NM_175485:-54          | Prtg       | PROMOTER               | 1.002                                                        | 0.667                          | 2082.78            | 1389.09            | 0.669                          | 1779.31            | 1189.59            |
| A_68_P26591020 | chr9:65917533-65917577                            | NM_001025612:-16       | Smx22      | PROMOTER               | 1.002                                                        | 0.574                          | 1232.18            | 707.05             | 0.575                          | 1090.17            | 626.54             |
| A_68_P23607763 | chr5:36807446-36807491                            | NM_024478:-365         | Grpel1     | PROMOTER               | 1.002                                                        | 0.140                          | 3433.06            | 479.68             | 0.140                          | 2383.39            | 333.70             |
| A_68_P23392000 | chr4:147413032-147413076                          | NM_010840:-131         | Mthfr      | DIVERGENT_PROMOTER     | 1.002                                                        | 0.251                          | 2494.89            | 625.18             | 0.251                          | 1924.69            | 483.03             |
| A_68_P22630568 | chr3:148652007-148652051                          | ENSMUST00000098518:252 |            | INSIDE                 | 1.002                                                        | 1.865                          | 967.58             | 1804.17            | 1.869                          | 811.05             | 1515.71            |
| A_68_P21601162 | chr2:125073336-125073380                          | NM_023595:108          | Dut        | INSIDE                 | 1.002                                                        | 0.149                          | 3798.22            | 564.08             | 0.149                          | 2875.41            | 427.95             |
| A_68_P20878147 | chr1:182781059-182781103                          | NM_145943:-201         | BC031781   | PROMOTER               | 1.002                                                        | 0.202                          | 3252.27            | 658.27             | 0.203                          | 2469.29            | 500.94             |
| A_68_P32537858 | chrX:91457905-91457949                            | NM_012010:64           | Eif2s3x    | INSIDE                 | 1.001                                                        | 0.404                          | 1468.25            | 592.94             | 0.404                          | 1300.14            | 525.78             |
| A_68_P32319553 | chrX:34185171-34185215                            | NM_001081956:217       | Akap17b    | INSIDE                 | 1.001                                                        | 2.683                          | 412.34             | 1106.39            | 2.687                          | 649.70             | 1745.84            |
| A_68_P32121151 | chr19:42507010-42507054                           | NM_145123:-759         | Crtac1     | PROMOTER               | 1.001                                                        | 0.483                          | 4107.03            | 1983.04            | 0.483                          | 3207.04            | 1550.22            |
| A_68_P30380962 | chr15:81846721-81846765                           | NM_010247:-56          | Xrec6      | DIVERGENT_PROMOTER     | 1.001                                                        | 0.491                          | 2209.26            | 1084.67            | 0.491                          | 1637.73            | 804.88             |
| A_68_P27453303 | chr10:111707353-111707397                         | NM_001025581:-804      | Kcnc2      | PROMOTER               | 1.001                                                        | 0.417                          | 2673.07            | 1114.46            | 0.417                          | 1995.52            | 832.97             |
| A_68_P26451992 | chr9:41698412-41698459                            |                        |            | Unknown                | 1.001                                                        | 0.458                          | 2471.01            | 1132.13            | 0.459                          | 1690.66            | 775.25             |
| A_68_P26430869 | chr9:37296739-37296783                            | NM_146222:-145         | BC024479   | PROMOTER               | 1.001                                                        | 0.457                          | 1684.88            | 770.07             | 0.458                          | 1196.85            | 547.62             |
| A_68_P25954144 | chr8:73321416-73321460                            | NM_199308:-5106        | Mast3      | PROMOTER               | 1.001                                                        | 0.428                          | 3166.53            | 1355.46            | 0.429                          | 2223.66            | 953.26             |
| A_68_P25592939 | chr7:149280544-149280588                          | NM_008748:623          | Dusp8      | INSIDE                 | 1.001                                                        | 0.526                          | 2116.44            | 1112.68            | 0.526                          | 1708.79            | 899.12             |
| A_68_P24946542 | chr7:3597193-3597237                              | NM_146176:344          | Cnot3      | INSIDE                 | 1.001                                                        | 0.337                          | 1835.57            | 618.71             | 0.337                          | 1439.78            | 485.72             |

| ProbeName      | Target position of probe on CpG island microarray | TargetID                | GeneSymbol    | CpG island Description | Ratio of relative methylation (TiO <sub>2</sub> -NP/Vehicle) | Sham group                     |                    |                    | TiO <sub>2</sub> -H group      |                    |                    |
|----------------|---------------------------------------------------|-------------------------|---------------|------------------------|--------------------------------------------------------------|--------------------------------|--------------------|--------------------|--------------------------------|--------------------|--------------------|
|                |                                                   |                         |               |                        |                                                              | Relative methylation (Cy5/Cy3) | Cy3 signal (Input) | Cy5 signal (MeDIP) | Relative methylation (Cy5/Cy3) | Cy3 signal (Input) | Cy5 signal (MeDIP) |
| A_68_P24839021 | chr6:128388523-128388567                          | NM_010219:105           | Fkbp4         | INSIDE                 | 1.001                                                        | 1.568                          | 912.24             | 1429.95            | 1.569                          | 856.10             | 1343.00            |
| A_68_P24754179 | chr6:112439818-112439862                          | NM_001081147:-38        | Oxtr          | PROMOTER               | 1.001                                                        | 0.267                          | 1972.88            | 527.01             | 0.267                          | 1578.23            | 421.91             |
| A_68_P24224752 | chr6:8159107-8159151                              | NM_145374:-98           | Mios          | PROMOTER               | 1.001                                                        | 0.341                          | 1811.56            | 617.93             | 0.341                          | 1460.54            | 498.69             |
| A_68_P23668848 | chr5:48374910-48374954                            | NM_178804:539           | Slit2         | INSIDE                 | 1.001                                                        | 0.442                          | 2790.41            | 1234.42            | 0.443                          | 2022.37            | 895.36             |
| A_68_P23324348 | chr4:134260291-134260335                          | NM_207237:-107          | Man1c1        | PROMOTER               | 1.001                                                        | 0.576                          | 3228.71            | 1859.99            | 0.577                          | 2218.31            | 1279.27            |
| A_68_P22288625 | chr3:83843924-83843968                            | NM_172681:137           | D930015E06Rik | INSIDE                 | 1.001                                                        | 1.649                          | 1191.91            | 1965.73            | 1.651                          | 949.74             | 1567.63            |
| A_68_P20354542 | chr1:75501748-75501792                            | NM_178884:1257          | Obsl1         | INSIDE                 | 1.001                                                        | 0.203                          | 2183.96            | 443.60             | 0.203                          | 1590.64            | 323.49             |
| A_68_P32082683 | chr19:34953737-34953781                           | NM_023792:-1351         | Pank1         | PROMOTER               | 1.000                                                        | 0.289                          | 1781.93            | 514.28             | 0.289                          | 1337.15            | 385.86             |
| A_68_P30080950 | chr15:25344237-25344281                           | NR_027376:312           | Gm5468        | INSIDE                 | 1.000                                                        | 2.569                          | 530.71             | 1363.27            | 2.569                          | 450.37             | 1157.16            |
| A_68_P28748130 | chr12:113382569-113382613                         | NM_001097621:-1828      | Kif26a        | PROMOTER               | 1.000                                                        | 2.737                          | 446.39             | 1221.90            | 2.736                          | 346.85             | 949.12             |
| A_68_P28224317 | chr12:8778225-8778269                             | NM_011519:45            | Sdc1          | INSIDE                 | 1.000                                                        | 0.320                          | 2378.23            | 761.40             | 0.320                          | 1801.24            | 576.47             |
| A_68_P28095689 | chr11:105224379-105224423                         | NM_172568:93649         | Marchf10      | INSIDE                 | 1.000                                                        | 0.462                          | 1019.28            | 471.31             | 0.462                          | 779.62             | 360.35             |
| A_68_P27854136 | chr11:62272091-62272135                           | NM_001039536:151        | Pigl          | INSIDE                 | 1.000                                                        | 1.641                          | 867.86             | 1424.34            | 1.640                          | 764.29             | 1253.76            |
| A_68_P26949006 | chr10:12810713-12810757                           | NM_009538:141           | Plagl1        | INSIDE                 | 1.000                                                        | 2.749                          | 709.34             | 1949.90            | 2.750                          | 696.47             | 1915.34            |
| A_68_P25953307 | chr8:73197405-73197449                            | NM_015816:297           | Lsm4          | INSIDE                 | 1.000                                                        | 0.517                          | 1582.25            | 817.48             | 0.517                          | 1202.87            | 621.68             |
| A_68_P25531558 | chr7:139158263-139158307                          | NM_173410:142           | Gpr26         | INSIDE                 | 1.000                                                        | 0.329                          | 1995.89            | 657.13             | 0.329                          | 1561.98            | 514.02             |
| A_68_P24444192 | chr6:51382686-51382730                            | NM_010903:40            | Nfe2l3        | INSIDE                 | 1.000                                                        | 0.260                          | 3433.02            | 891.86             | 0.260                          | 2616.73            | 680.10             |
| A_68_P23338973 | chr4:136833633-136833677                          | NM_009523:105           | Wnt4          | INSIDE                 | 1.000                                                        | 3.219                          | 592.16             | 1906.29            | 3.219                          | 499.90             | 1609.32            |
| A_68_P22313622 | chr3:88214207-88214256                            | NM_025928:7             | Pmf1          | INSIDE                 | 1.000                                                        | 3.672                          | 693.69             | 2547.25            | 3.672                          | 622.06             | 2283.94            |
| A_68_P21817618 | chr2:164226131-164226175                          | NM_009036:-2541         | Rbpjl         | PROMOTER               | 1.000                                                        | 0.550                          | 1864.38            | 1025.37            | 0.550                          | 1483.81            | 815.71             |
| A_68_P2177899  | chr2:157391883-157391927                          | NM_016916:193           | Bcap          | INSIDE                 | 1.000                                                        | 0.301                          | 1484.91            | 447.01             | 0.301                          | 1251.32            | 376.55             |
| A_68_P21266438 | chr2:61649821-61649865                            | NM_009322:7333          | Tbr1          | INSIDE                 | 1.000                                                        | 3.566                          | 732.77             | 2612.71            | 3.566                          | 646.52             | 2305.47            |
| A_68_P32578105 | chrX:101866222-101866266                          | NM_175358:159           | Zdhhc15       | INSIDE                 | 0.999                                                        | 0.601                          | 901.94             | 541.74             | 0.600                          | 1276.50            | 766.19             |
| A_68_P31104080 | chr17:25611583-25611627                           | NM_027951:3070          | Tekt4         | INSIDE                 | 0.999                                                        | 0.429                          | 1359.50            | 583.80             | 0.429                          | 1088.25            | 466.68             |
| A_68_P29613442 | chr14:55260574-55260618                           | NM_199470:-395          | Cdh24         | PROMOTER               | 0.999                                                        | 0.562                          | 2406.10            | 1351.79            | 0.562                          | 1608.68            | 903.33             |
| A_68_P27812595 | chr11:54716247-54716291                           | NM_001083929:-86        | Gpx3          | PROMOTER               | 0.999                                                        | 1.932                          | 1114.92            | 2154.31            | 1.931                          | 906.27             | 1749.72            |
| A_68_P27567705 | chr11:6191666-6191710                             | NM_010956:89            | Ogdh          | INSIDE                 | 0.999                                                        | 0.143                          | 3089.09            | 442.31             | 0.143                          | 2101.98            | 300.76             |
| A_68_P27357054 | chr10:93498512-93498556                           | NM_172538:-41           | Vezt          | DIVERGENT_PROMOTER     | 0.999                                                        | 0.457                          | 3590.51            | 1641.56            | 0.457                          | 2513.62            | 1147.63            |
| A_68_P27282472 | chr10:79786332-79786376                           | NM_008793:5864          | Pcsk4         | INSIDE                 | 0.999                                                        | 0.558                          | 3913.77            | 2184.92            | 0.558                          | 2691.16            | 1500.79            |
| A_68_P25951454 | chr8:72900470-72900514                            | NM_016685:3046          | Comp          | INSIDE                 | 0.999                                                        | 0.224                          | 2570.61            | 576.30             | 0.224                          | 1749.78            | 391.99             |
| A_68_P24990325 | chr7:19479208-19479252                            | NM_001033314:16523      | Ccdc61        | INSIDE                 | 0.999                                                        | 0.597                          | 3625.12            | 2163.88            | 0.596                          | 2394.12            | 1427.23            |
| A_68_P23536417 | chr5:22940364-22940408                            | NM_026984:140           | Mil5          | INSIDE                 | 0.999                                                        | 0.118                          | 4048.72            | 477.37             | 0.118                          | 2828.48            | 333.01             |
| A_68_P23415140 | chr4:151236795-151236839                          | NM_001081557:-939       | Camta1        | PROMOTER               | 0.999                                                        | 0.408                          | 1180.07            | 481.81             | 0.408                          | 869.04             | 354.54             |
| A_68_P23280297 | chr4:126145852-126145896                          | NM_153403:-209          | Eif2c1        | PROMOTER               | 0.999                                                        | 2.047                          | 417.76             | 855.15             | 2.046                          | 390.87             | 799.65             |
| A_68_P22411698 | chr3:108087081-108087125                          | NM_019972:53            | Sorf1         | INSIDE                 | 0.999                                                        | 2.352                          | 3350.13            | 7879.60            | 2.350                          | 2715.53            | 6380.99            |
| A_68_P21828032 | chr2:165981031-165981075                          | NM_028072:104           | Sul12         | INSIDE                 | 0.999                                                        | 1.658                          | 1191.87            | 1976.34            | 1.657                          | 1005.07            | 1665.76            |
| A_68_P20936389 | chr1:192949970-192950014                          | ENSMUST00000158219:5019 |               | DOWNSTREAM             | 0.999                                                        | 0.231                          | 3110.01            | 719.69             | 0.231                          | 2171.80            | 502.24             |
| A_68_P31256954 | chr17:56705768-56705812                           | NM_001029979:18216      | Safb2         | INSIDE                 | 0.998                                                        | 2.355                          | 2485.42            | 5852.90            | 2.349                          | 1980.41            | 4652.53            |
| A_68_P30473865 | chr15:98087521-98087565                           | NM_027304:196           | H1ft          | INSIDE                 | 0.998                                                        | 2.143                          | 616.96             | 1322.02            | 2.139                          | 591.20             | 1264.68            |
| A_68_P29702035 | chr14:70954292-70954336                           | NM_021877:452           | Hr            | INSIDE                 | 0.998                                                        | 0.579                          | 1310.54            | 759.28             | 0.578                          | 998.40             | 577.09             |
| A_68_P28159660 | chr11:116351347-116351391                         | NM_026364:292           | Prpsap1       | INSIDE                 | 0.998                                                        | 0.377                          | 2020.04            | 760.62             | 0.376                          | 1583.51            | 595.09             |
| A_68_P26770339 | chr9:100471468-100471512                          | NM_001101483:14         | Tmem22        | INSIDE                 | 0.998                                                        | 2.005                          | 643.48             | 1290.12            | 2.002                          | 532.10             | 1065.20            |
| A_68_P26165985 | chr8:113521608-113521652                          | NM_007916:93            | Ddx19a        | INSIDE                 | 0.998                                                        | 0.656                          | 2035.06            | 1335.32            | 0.655                          | 1570.83            | 1028.26            |
| A_68_P24193750 | chr5:151755531-151755575                          | NM_013823:371           | Kl            | INSIDE                 | 0.998                                                        | 0.335                          | 1607.72            | 538.15             | 0.334                          | 1205.62            | 402.79             |
| A_68_P21117162 | chr2:32597241-32597285                            | NM_013781:20671         | Sh2d3c        | INSIDE                 | 0.998                                                        | 0.320                          | 1915.19            | 611.96             | 0.319                          | 1630.94            | 519.97             |
| A_68_P20600072 | chr1:130256315-130256359                          | NM_008567:-103          | Mcm6          | PROMOTER               | 0.998                                                        | 0.264                          | 1837.94            | 485.52             | 0.264                          | 1443.55            | 380.47             |
| A_68_P31097497 | chr17:24607518-24607562                           | NM_025954:123           | Pgp           | INSIDE                 | 0.997                                                        | 0.577                          | 1872.99            | 1080.40            | 0.575                          | 1511.88            | 869.49             |
| A_68_P30495773 | chr15:101904768-101904812                         | NM_145625:587           | Eif4b         | INSIDE                 | 0.997                                                        | 0.394                          | 2254.00            | 887.84             | 0.393                          | 1887.31            | 741.33             |
| A_68_P30465076 | chr15:96529677-96529721                           | NM_175121:431           | Slc38a2       | INSIDE                 | 0.997                                                        | 0.196                          | 3920.63            | 769.96             | 0.196                          | 2454.20            | 480.70             |
| A_68_P29689073 | chr14:68701763-68701807                           | NM_010910:-156          | Nefl          | PROMOTER               | 0.997                                                        | 0.496                          | 3785.17            | 1875.88            | 0.494                          | 2847.33            | 1406.73            |
| A_68_P27189847 | chr10:62655248-62655292                           | NM_182992:11430         | Mypn          | INSIDE                 | 0.997                                                        | 2.523                          | 352.22             | 888.67             | 2.516                          | 317.97             | 799.88             |
| A_68_P27100536 | chr10:43199837-43199881                           | NM_199028:913           | Bend3         | INSIDE                 | 0.997                                                        | 1.497                          | 1117.28            | 1672.72            | 1.493                          | 985.48             | 1471.70            |
| A_68_P26783897 | chr9:103014037-103014081                          | NM_173781:-345          | Rab6b         | PROMOTER               | 0.997                                                        | 0.554                          | 1541.77            | 854.89             | 0.553                          | 1260.66            | 697.13             |
| A_68_P25581339 | chr7:147130322-147130366                          | NM_009482:590           | Utl1          | INSIDE                 | 0.997                                                        | 0.215                          | 3192.89            | 687.99             | 0.215                          | 2204.12            | 473.51             |
| A_68_P25370886 | chr7:108147189-108147233                          | NM_008773:13295         | P2ry2         | INSIDE                 | 0.997                                                        | 2.721                          | 1997.55            | 5435.94            | 2.713                          | 1596.74            | 4331.41            |
| A_68_P25358212 | chr7:105987224-105987268                          | NM_009519:-108          | Wnt11         | PROMOTER               | 0.997                                                        | 0.342                          | 1417.92            | 484.36             | 0.341                          | 1081.77            | 368.37             |
| A_68_P24008563 | chr5:115685673-115685717                          | NM_026398:-165          | Pop5          | PROMOTER               | 0.997                                                        | 1.567                          | 1326.00            | 2077.61            | 1.561                          | 1106.29            | 1727.38            |
| A_68_P23541891 | chr5:23951016-23951060                            | NM_023229:15            | Fastk         | INSIDE                 | 0.997                                                        | 2.360                          | 1088.14            | 2567.64            | 2.353                          | 885.15             | 2082.83            |
| A_68_P22006136 | chr3:26230775-26230819                            | NM_138666:35            | Nlgn1         | INSIDE                 | 0.997                                                        | 0.449                          | 2792.91            | 1253.42            | 0.447                          | 2035.59            | 910.86             |
| A_68_P21568534 | chr2:119063096-119063140                          | NM_016907:23            | Spint1        | INSIDE                 | 0.997                                                        | 2.940                          | 756.30             | 2223.63            | 2.931                          | 526.12             | 1542.19            |
| A_68_P21103105 | chr2:30272089-30272133                            | NM_138748:541           | Ppp2r4        | INSIDE                 | 0.997                                                        | 0.335                          | 4058.48            | 1361.23            | 0.334                          | 2910.21            | 973.03             |
| A_68_P28466189 | chr12:59313486-59313530                           | NM_009216:718           | Sstr1         | INSIDE                 | 0.996                                                        | 2.118                          | 1087.35            | 2303.06            | 2.110                          | 866.74             | 1828.44            |
| A_68_P28143200 | chr11:113510983-113511027                         | NM_013581:162           | Cogl          | INSIDE                 | 0.996                                                        | 0.546                          | 1499.24            | 818.85             | 0.544                          | 1169.47            | 635.96             |
| A_68_P28084674 | chr11:103195207-103195251                         | NM_133715:10788         | Arhgap27      | INSIDE                 | 0.996                                                        | 0.452                          | 1112.40            | 502.43             | 0.450                          | 885.31             | 398.21             |
| A_68_P27555762 | chr11:4018372-4018416                             | NM_144520:338           | Sec14l2       | INSIDE                 | 0.996                                                        | 0.553                          | 1420.33            | 785.92             | 0.551                          | 1157.05            | 637.93             |

| ProbeName      | Target position of probe on CpG island microarray | TargetID            | GeneSymbol    | CpG island Description | Ratio of relative methylation (TiO <sub>2</sub> -NP/Vehicle) | Sham group                     |                    |                    | TiO <sub>2</sub> -H group      |                    |                    |
|----------------|---------------------------------------------------|---------------------|---------------|------------------------|--------------------------------------------------------------|--------------------------------|--------------------|--------------------|--------------------------------|--------------------|--------------------|
|                |                                                   |                     |               |                        |                                                              | Relative methylation (Cy5/Cy3) | Cy3 signal (Input) | Cy5 signal (MeDIP) | Relative methylation (Cy5/Cy3) | Cy3 signal (Input) | Cy5 signal (MeDIP) |
| A_68_P27354860 | chr10:93103568-93103612                           | NM_021320:-203      | Ntn4          | PROMOTER               | 0.996                                                        | 1.674                          | 2050.00            | 3432.16            | 1.668                          | 1530.24            | 2551.83            |
| A_68_P26872176 | chr9:119312610-119312654                          | NM_007397:1014      | Acvr2b        | INSIDE                 | 0.996                                                        | 0.491                          | 1556.61            | 764.08             | 0.489                          | 1120.00            | 547.79             |
| A_68_P26617806 | chr9:70527432-70527476                            | NM_007399:647       | Adam10        | INSIDE                 | 0.996                                                        | 6.284                          | 1007.21            | 6329.21            | 6.261                          | 830.15             | 5197.49            |
| A_68_P26595470 | chr9:66682593-66682637                            | NM_026674:-101      | Aph1c         | PROMOTER               | 0.996                                                        | 0.299                          | 3958.45            | 1184.00            | 0.298                          | 2934.08            | 873.98             |
| A_68_P26319140 | chr9:14555819-14555863                            | NM_010242:726       | Fut4          | INSIDE                 | 0.996                                                        | 0.607                          | 2981.25            | 1810.81            | 0.605                          | 2093.17            | 1266.10            |
| A_68_P25949228 | chr8:72520400-72520444                            | NM_001113345:-144   | Gata2a        | PROMOTER               | 0.996                                                        | 0.169                          | 2895.36            | 489.93             | 0.168                          | 2165.94            | 364.89             |
| A_68_P25596372 | chr7:149846899-149846943                          | NM_001122736:20     | Igf2          | INSIDE                 | 0.996                                                        | 0.533                          | 2142.62            | 1142.75            | 0.531                          | 1775.40            | 943.40             |
| A_68_P25349895 | chr7:104474236-104474280                          | NM_001177412:216    | Usp35         | INSIDE                 | 0.996                                                        | 1.636                          | 840.98             | 1375.73            | 1.629                          | 746.60             | 1215.88            |
| A_68_P24085132 | chr5:129288040-129288085                          | NM_001081388:171175 | Rimbp2        | INSIDE                 | 0.996                                                        | 2.009                          | 758.25             | 1523.66            | 2.001                          | 580.98             | 1162.59            |
| A_68_P23929926 | chr5:100927778-100927822                          | NM_001115010:-208   | Lin54         | PROMOTER               | 0.996                                                        | 0.180                          | 5492.00            | 987.18             | 0.179                          | 3436.36            | 615.15             |
| A_68_P23221707 | chr4:114494191-114494235                          | NR_033617:-112      | Gml2830       | PROMOTER               | 0.996                                                        | 0.350                          | 2576.96            | 903.02             | 0.349                          | 1914.64            | 668.09             |
| A_68_P31961512 | chr19:12670749-12670793                           | NR_015503:286       | A330040F15Rik | INSIDE                 | 0.995                                                        | 0.249                          | 1969.80            | 490.34             | 0.248                          | 1356.00            | 335.83             |
| A_68_P31620310 | chr18:35990907-35990952                           | NM_133687:1458      | Cxhc5         | INSIDE                 | 0.995                                                        | 3.446                          | 267.52             | 922.00             | 3.428                          | 253.15             | 867.80             |
| A_68_P31114504 | chr17:27270575-27270620                           | NM_026063:239       | 2900010M23Rik | INSIDE                 | 0.995                                                        | 0.476                          | 3275.89            | 1559.05            | 0.474                          | 2497.61            | 1183.11            |
| A_68_P30499541 | chr15:102577044-102577088                         |                     | Unknown       |                        | 0.995                                                        | 0.229                          | 3183.00            | 728.11             | 0.228                          | 2200.12            | 500.92             |
| A_68_P27971357 | chr11:83232403-83232447                           | NM_001013386:8851   | Ras10b        | INSIDE                 | 0.995                                                        | 0.569                          | 1374.11            | 781.67             | 0.566                          | 1135.39            | 642.82             |
| A_68_P27179601 | chr10:60736090-60736134                           | NM_001081127:74     | Adams14       | INSIDE                 | 0.995                                                        | 1.642                          | 873.06             | 1433.35            | 1.634                          | 779.80             | 1273.90            |
| A_68_P26468507 | chr9:44412404-44412448                            | NM_00110826:-548    | Ddx6          | PROMOTER               | 0.995                                                        | 0.450                          | 1548.45            | 696.67             | 0.448                          | 1179.52            | 528.26             |
| A_68_P25173484 | chr7:70903305-70903349                            | NM_130880:313669    | Otd47a        | INSIDE                 | 0.995                                                        | 2.162                          | 355.15             | 767.81             | 2.152                          | 332.87             | 716.29             |
| A_68_P25090464 | chr7:52241287-52241331                            | NM_019830:394       | Prrt1         | INSIDE                 | 0.995                                                        | 0.573                          | 1914.56            | 1097.94            | 0.571                          | 1614.04            | 921.28             |
| A_68_P25047600 | chr7:35903087-35903131                            | NM_007678:-1203     | Cebpa         | PROMOTER               | 0.995                                                        | 0.421                          | 2266.84            | 954.25             | 0.419                          | 1685.06            | 705.81             |
| A_68_P23120717 | chr4:94719222-94719266                            | NM_010591:-331      | Jun           | PROMOTER               | 0.995                                                        | 0.530                          | 1136.43            | 602.10             | 0.527                          | 882.26             | 464.88             |
| A_68_P31369867 | chr17:78599714-78599759                           | NM_015800:149       | Crim1         | INSIDE                 | 0.994                                                        | 1.748                          | 1475.80            | 2579.43            | 1.737                          | 1075.29            | 1867.95            |
| A_68_P31232584 | chr17:51318828-51318872                           | NM_028162:-176      | Tbcd15        | PROMOTER               | 0.994                                                        | 0.392                          | 2344.84            | 918.11             | 0.389                          | 1699.14            | 661.22             |
| A_68_P30350783 | chr15:76647954-76647998                           | NM_001168288:624    | Arhgap39      | INSIDE                 | 0.994                                                        | 0.381                          | 7678.14            | 2928.98            | 0.379                          | 5137.18            | 1947.28            |
| A_68_P29942851 | chr14:119537089-119537133                         | NM_015820:-376      | Hs6st3        | PROMOTER               | 0.994                                                        | 2.040                          | 498.30             | 1016.30            | 2.026                          | 434.59             | 880.68             |
| A_68_P29372953 | chr13:120197613-120197657                         | NM_008710:184       | Nat           | INSIDE                 | 0.994                                                        | 0.452                          | 1168.97            | 528.24             | 0.449                          | 1041.43            | 467.91             |
| A_68_P27921612 | chr11:74452062-74452106                           | NM_001013784:18978  | E130309D14Rik | INSIDE                 | 0.994                                                        | 2.097                          | 780.95             | 1637.35            | 2.083                          | 629.99             | 1312.49            |
| A_68_P27127187 | chr10:49502783-49502839                           | NM_001111268:5750   | Grik2         | INSIDE                 | 0.994                                                        | 3.943                          | 430.91             | 1698.91            | 3.920                          | 329.09             | 1290.16            |
| A_68_P26885417 | chr9:121672235-121672279                          | NM_001166644:3106   | Zfp651        | INSIDE                 | 0.994                                                        | 2.273                          | 497.96             | 1131.66            | 2.258                          | 453.81             | 1024.91            |
| A_68_P25804897 | chr8:41392991-41393035                            | NM_030110:-392      | Etha2         | PROMOTER               | 0.994                                                        | 1.514                          | 1299.91            | 1968.07            | 1.505                          | 1089.61            | 1639.53            |
| A_68_P24770500 | chr6:115312177-115312222                          | NM_001127330:961    | Pparg         | INSIDE                 | 0.994                                                        | 1.464                          | 2173.42            | 3181.21            | 1.455                          | 1794.67            | 2610.64            |
| A_68_P24155044 | chr5:143874288-143874332                          | NM_080561:389       | Rnf216        | INSIDE                 | 0.994                                                        | 2.497                          | 818.12             | 2043.12            | 2.483                          | 673.87             | 1673.39            |
| A_68_P21142144 | chr2:37298887-37298931                            | NM_001033960:-8865  | Rabgap1       | PROMOTER               | 0.994                                                        | 0.315                          | 1540.87            | 485.31             | 0.313                          | 885.62             | 277.13             |
| A_68_P21107214 | chr2:30996795-30996839                            | NM_001038700:712    | Fbnp1         | INSIDE                 | 0.994                                                        | 0.380                          | 1887.00            | 717.73             | 0.378                          | 1577.12            | 596.36             |
| A_68_P32672206 | chrX:131009632-131009676                          | NM_028958:1375      | Taf7l         | INSIDE                 | 0.993                                                        | 2.558                          | 439.79             | 1125.05            | 2.541                          | 683.16             | 1736.05            |
| A_68_P31668412 | chr18:44821284-44821328                           | NR_026853:-12       | A930012L18Rik | PROMOTER               | 0.993                                                        | 0.513                          | 3037.47            | 1557.01            | 0.509                          | 2389.28            | 1216.13            |
| A_68_P31386733 | chr17:81464391-81464435                           | NM_028138:13        | Thumpd2       | INSIDE                 | 0.993                                                        | 3.680                          | 734.09             | 2701.69            | 3.653                          | 576.92             | 2107.51            |
| A_68_P29443675 | chr14:20643061-20643105                           | NM_026528:-37       | 2700060E02Rik | PROMOTER               | 0.993                                                        | 0.508                          | 1378.53            | 699.93             | 0.504                          | 1175.51            | 592.42             |
| A_68_P28043963 | chr11:96207399-96207443                           | NM_010458:2338      | Hoxb3         | INSIDE                 | 0.993                                                        | 0.414                          | 1948.96            | 807.69             | 0.411                          | 1528.76            | 628.92             |
| A_68_P27468587 | chr10:114688668-114688723                         | NM_025706:-146      | Tbcd15        | PROMOTER               | 0.993                                                        | 0.215                          | 2779.10            | 596.63             | 0.213                          | 2145.65            | 457.21             |
| A_68_P26486121 | chr9:47338434-47338478                            | NM_001025600:22     | Cadm1         | INSIDE                 | 0.993                                                        | 0.462                          | 1183.87            | 547.48             | 0.459                          | 1064.90            | 489.14             |
| A_68_P26348939 | chr9:21599872-21599916                            | NM_145611:3096      | Kank2         | INSIDE                 | 0.993                                                        | 3.814                          | 467.61             | 1783.50            | 3.787                          | 370.58             | 1403.47            |
| A_68_P23409802 | chr4:150431872-150431916                          | NM_009498:168       | Vamp3         | INSIDE                 | 0.993                                                        | 3.751                          | 686.59             | 2575.17            | 3.723                          | 573.29             | 2134.63            |
| A_68_P23296404 | chr4:129055173-129055217                          | NM_028603:78        | Zbtb8a        | INSIDE                 | 0.993                                                        | 0.564                          | 1379.12            | 777.69             | 0.560                          | 1094.12            | 612.58             |
| A_68_P22356817 | chr3:97671916-97671960                            | NM_177145:297       | Pde4dip       | INSIDE                 | 0.993                                                        | 0.529                          | 1165.88            | 617.28             | 0.526                          | 1060.07            | 557.61             |
| A_68_P21419448 | chr2:90725956-90726000                            | NM_026161:36        | C1qtnf4       | INSIDE                 | 0.993                                                        | 0.479                          | 1338.71            | 641.62             | 0.476                          | 1063.19            | 505.97             |
| A_68_P21133066 | chr2:35192576-35192620                            | NM_013515:-69       | Stom          | PROMOTER               | 0.993                                                        | 3.041                          | 2076.63            | 6314.64            | 3.019                          | 1581.85            | 4775.85            |
| A_68_P20632582 | chr1:136196052-136196096                          | NM_001144855:33431  | Ppfia4        | INSIDE                 | 0.993                                                        | 0.540                          | 1293.94            | 698.65             | 0.536                          | 970.02             | 520.26             |
| A_68_P20058164 | chr1:17087723-17087767                            | NM_020604:226       | Jph1          | INSIDE                 | 0.993                                                        | 0.690                          | 2769.18            | 1911.14            | 0.685                          | 2226.10            | 1525.00            |
| A_68_P32143068 | chr19:46379305-46379349                           | NM_019408:-858      | Nfkb2         | PROMOTER               | 0.992                                                        | 0.368                          | 1270.91            | 467.95             | 0.365                          | 995.05             | 363.43             |
| A_68_P31159054 | chr17:35496374-35496419                           | M19687:92581        |               | INSIDE                 | 0.992                                                        | 0.302                          | 1684.27            | 507.97             | 0.299                          | 1293.48            | 387.13             |
| A_68_P31003192 | chr17:3114390-3114434                             | NM_134123:-559      | Scaf8         | PROMOTER               | 0.992                                                        | 0.420                          | 2984.32            | 1254.36            | 0.417                          | 2262.35            | 943.65             |
| A_68_P30997386 | chr16:97392403-97392447                           | NM_031174:-82       | Dscam         | PROMOTER               | 0.992                                                        | 2.198                          | 625.35             | 1374.32            | 2.181                          | 477.76             | 1042.02            |
| A_68_P30655991 | chr16:33056419-33056463                           | NM_001130485:-98    | Rpl35a        | DIVERGENT_PROMOTER     | 0.992                                                        | 0.327                          | 1355.66            | 443.23             | 0.324                          | 1068.59            | 346.42             |
| A_68_P30371903 | chr15:80202683-80202727                           | NM_001044308:85037  | Cacna1i       | INSIDE                 | 0.992                                                        | 2.751                          | 1078.39            | 2966.12            | 2.729                          | 811.13             | 2213.66            |
| A_68_P29702361 | chr14:70999208-70999252                           | NM_194345:412       | Fam160b2      | INSIDE                 | 0.992                                                        | 0.422                          | 2404.86            | 1015.18            | 0.419                          | 1846.22            | 773.24             |
| A_68_P29437784 | chr14:19103158-19103202                           | NM_025586:320       | Rpl15         | INSIDE                 | 0.992                                                        | 0.634                          | 1888.59            | 1196.44            | 0.629                          | 1439.33            | 904.83             |
| A_68_P28266973 | chr12:16817722-16817766                           | NM_033270:-26       | E2f6          | PROMOTER               | 0.992                                                        | 0.313                          | 1604.36            | 501.55             | 0.310                          | 1248.84            | 387.41             |
| A_68_P26610636 | chr9:69245924-69245968                            | NM_145618:142       | Narg2         | INSIDE                 | 0.992                                                        | 0.175                          | 6351.96            | 1108.48            | 0.173                          | 4558.66            | 789.04             |
| A_68_P25502831 | chr7:134028530-134028574                          | NM_001163774:-71    | Taok2         | PROMOTER               | 0.992                                                        | 0.374                          | 1361.09            | 454.33             | 0.331                          | 1129.48            | 374.08             |
| A_68_P24839014 | chr6:128387845-128387889                          | NM_010219:783       | Fkbp4         | INSIDE                 | 0.992                                                        | 10.587                         | 3320.10            | 35150.37           | 10.506                         | 2630.48            | 27636.60           |
| A_68_P23227293 | chr4:115689981-115690025                          | NM_010173:505       | Faah          | INSIDE                 | 0.992                                                        | 0.596                          | 3116.91            | 1859.02            | 0.592                          | 2443.44            | 1446.16            |
| A_68_P23225504 | chr4:115410525-115410569                          | NM_172698:-131      | 4732418C07Rik | PROMOTER               | 0.992                                                        | 0.667                          | 3990.93            | 2660.55            | 0.661                          | 3077.97            | 2035.20            |
| A_68_P22406460 | chr3:107261217-107261261                          | NM_145922:578       | Kcnc4         | INSIDE                 | 0.992                                                        | 0.673                          | 2996.71            | 2017.81            | 0.668                          | 2434.72            | 1626.00            |

| ProbeName      | Target position of probe on CpG island microarray | TargetID              | GeneSymbol    | CpG island Description | Ratio of relative methylation (TiO <sub>2</sub> -NP/Vehicle) | Sham group                     |                    |                    | TiO <sub>2</sub> -H group      |                    |                    |
|----------------|---------------------------------------------------|-----------------------|---------------|------------------------|--------------------------------------------------------------|--------------------------------|--------------------|--------------------|--------------------------------|--------------------|--------------------|
|                |                                                   |                       |               |                        |                                                              | Relative methylation (Cy5/Cy3) | Cy3 signal (Input) | Cy5 signal (MeDIP) | Relative methylation (Cy5/Cy3) | Cy3 signal (Input) | Cy5 signal (MeDIP) |
| A_68_P20956471 | chr1:196446176-196446220                          | NM_008882:176         | Plxna2        | INSIDE                 | 0.992                                                        | 0.227                          | 2247.22            | 510.73             | 0.225                          | 1711.69            | 385.91             |
| A_68_P20799110 | chr1:168168534-168168578                          | NM_175296:319         | Mael          | INSIDE                 | 0.992                                                        | 2.320                          | 1434.49            | 3328.25            | 2.302                          | 1128.97            | 2598.83            |
| A_68_P32552411 | chrX:96085861-96085905                            | NM_052976:442         | Ophn1         | INSIDE                 | 0.991                                                        | 1.522                          | 918.23             | 1397.60            | 1.508                          | 1093.29            | 1648.85            |
| A_68_P32341130 | chrX:39502930-39502974                            | NM_021465:-925        | Stag2         | PROMOTER               | 0.991                                                        | 1.986                          | 528.51             | 1049.44            | 1.967                          | 750.35             | 1475.99            |
| A_68_P32154509 | chr19:48280479-48280523                           | NM_025696:-14         | Sores3        | PROMOTER               | 0.991                                                        | 0.417                          | 3211.54            | 1340.49            | 0.414                          | 2490.33            | 1029.89            |
| A_68_P31951139 | chr19:10599956-10600000                           | NM_001164272:245      | Cpsf7         | INSIDE                 | 0.991                                                        | 18.749                         | 4658.04            | 87335.33           | 18.583                         | 4844.25            | 90022.76           |
| A_68_P30512949 | chr16:4964346-4964390                             | NM_028301:-38         | Anks3         | PROMOTER               | 0.991                                                        | 1.718                          | 1873.88            | 3219.25            | 1.702                          | 1273.81            | 2168.61            |
| A_68_P30504522 | chr15:103333324-103333368                         | NM_008800:382         | Pde1b         | PROMOTER               | 0.991                                                        | 0.392                          | 6353.53            | 2490.54            | 0.388                          | 4387.70            | 1703.96            |
| A_68_P26397643 | chr9:30729700-30729744                            | NM_001024139:315      | Adams15       | INSIDE                 | 0.991                                                        | 0.323                          | 1982.39            | 639.37             | 0.319                          | 1539.68            | 491.91             |
| A_68_P26132768 | chr8:107814026-107814070                          | NM_177788:5950        | Exoc3l        | INSIDE                 | 0.991                                                        | 0.211                          | 3281.04            | 693.31             | 0.209                          | 2194.82            | 459.56             |
| A_68_P24929401 | chr6:146526297-146526341                          | NM_138757:39          | 4933424B01Rik | INSIDE                 | 0.991                                                        | 0.442                          | 1478.87            | 654.16             | 0.438                          | 1061.62            | 465.29             |
| A_68_P24057006 | chr5:124134216-124134260                          | NM_019765:62          | Clip1         | INSIDE                 | 0.991                                                        | 0.371                          | 6284.00            | 2332.64            | 0.368                          | 4587.32            | 1686.79            |
| A_68_P24038702 | chr5:120885755-120885799                          | NM_008499:3882        | Lhx5          | INSIDE                 | 0.991                                                        | 0.251                          | 2309.22            | 580.42             | 0.249                          | 1897.48            | 472.61             |
| A_68_P23080559 | chr4:86221959-86222003                            | NM_178376:404         | Rraga         | INSIDE                 | 0.991                                                        | 0.410                          | 1332.47            | 546.67             | 0.407                          | 1070.84            | 435.49             |
| A_68_P22957030 | chr4:59562123-59562167                            | NM_144904:92          | Rod1          | INSIDE                 | 0.991                                                        | 0.313                          | 2087.12            | 652.34             | 0.310                          | 1691.66            | 524.02             |
| A_68_P22319259 | chr3:89221857-89221906                            | NM_016904:332         | Cks1b         | INSIDE                 | 0.991                                                        | 0.238                          | 2145.23            | 509.61             | 0.236                          | 1701.16            | 400.65             |
| A_68_P20354307 | chr1:75471829-75471873                            | NM_001001565:4196     | Chpf          | INSIDE                 | 0.991                                                        | 2.024                          | 550.58             | 1114.35            | 2.005                          | 435.81             | 873.79             |
| A_68_P20293012 | chr1:64579202-64579246                            | NM_001037726:-153     | Creb1         | PROMOTER               | 0.991                                                        | 0.535                          | 1881.63            | 1006.66            | 0.530                          | 1464.43            | 776.19             |
| A_68_P30670426 | chr16:35490448-35490492                           | NM_028295:489         | Pdia5         | INSIDE                 | 0.990                                                        | 0.262                          | 2368.21            | 621.26             | 0.260                          | 1791.55            | 465.45             |
| A_68_P30337610 | chr15:74348840-74348884                           | NM_174991:2237        | Bai1          | INSIDE                 | 0.990                                                        | 0.567                          | 1773.22            | 1005.04            | 0.561                          | 1339.31            | 751.47             |
| A_68_P29730260 | chr14:76244587-76244631                           | NM_009429:-454        | Tpt1          | PROMOTER               | 0.990                                                        | 0.423                          | 1273.98            | 538.43             | 0.419                          | 1045.53            | 437.64             |
| A_68_P29249242 | chr13:97842053-97842097                           | NM_001100458:477      | Fam169a       | INSIDE                 | 0.990                                                        | 0.385                          | 7530.65            | 2895.56            | 0.381                          | 4992.47            | 1899.84            |
| A_68_P29024920 | chr13:49474941-49474985                           | NM_001039179:38045    | Bicd2         | INSIDE                 | 0.990                                                        | 1.582                          | 1404.28            | 2221.24            | 1.566                          | 1002.08            | 1568.77            |
| A_68_P28956973 | chr13:37949256-37949300                           | NM_001039188:30017    | Rreb1         | INSIDE                 | 0.990                                                        | 2.006                          | 607.82             | 1219.23            | 1.985                          | 543.39             | 1078.61            |
| A_68_P28120302 | chr11:109582605-109582649                         | NM_153782:944         | Fam20a        | INSIDE                 | 0.990                                                        | 0.560                          | 2179.47            | 1220.51            | 0.554                          | 1628.75            | 902.89             |
| A_68_P27798798 | chr11:52174210-52174254                           | NM_011694:-384        | Vdac1         | PROMOTER               | 0.990                                                        | 0.537                          | 1442.51            | 775.30             | 0.532                          | 1241.09            | 660.48             |
| A_68_P27479234 | chr10:116500653-116500697                         | NM_007636:196         | Cct2          | INSIDE                 | 0.990                                                        | 0.525                          | 966.27             | 507.47             | 0.520                          | 809.81             | 420.95             |
| A_68_P26685863 | chr9:83728338-83728382                            | NM_001110265:65       | Ttk           | INSIDE                 | 0.990                                                        | 0.172                          | 6252.97            | 1077.12            | 0.170                          | 4358.65            | 743.05             |
| A_68_P26658153 | chr9:77955869-77955913                            | NM_023605:573         | Fbxo9         | INSIDE                 | 0.990                                                        | 0.678                          | 2544.68            | 1726.07            | 0.672                          | 1935.39            | 1299.62            |
| A_68_P26167600 | chr8:113824005-113824049                          | NM_146218:96          | Rfwd3         | INSIDE                 | 0.990                                                        | 0.364                          | 3910.95            | 1422.93            | 0.360                          | 2880.63            | 1037.41            |
| A_68_P26056688 | chr8:93593942-93593986                            | NM_011250:-28         | Rbl2          | PROMOTER               | 0.990                                                        | 1.910                          | 1035.60            | 1978.24            | 1.892                          | 802.51             | 1518.22            |
| A_68_P25364270 | chr7:107007573-107007617                          | NM_001164258:-133     | Xrra1         | DIVERGENT_PROMOTER     | 0.990                                                        | 2.594                          | 898.13             | 2329.70            | 2.568                          | 794.43             | 2039.98            |
| A_68_P25354430 | chr7:105342884-105342928                          | NM_001081167:5079     | B3gnt6        | INSIDE                 | 0.990                                                        | 2.865                          | 554.25             | 1588.06            | 2.838                          | 446.12             | 1266.05            |
| A_68_P24533906 | chr6:70906262-70906307                            | NM_001101464:-315     | Foxi3         | PROMOTER               | 0.990                                                        | 0.146                          | 3627.46            | 529.41             | 0.145                          | 2503.42            | 361.86             |
| A_68_P24141718 | chr5:140981389-140981433                          | NM_021528:-152        | Chst12        | PROMOTER               | 0.990                                                        | 0.557                          | 1202.21            | 670.09             | 0.552                          | 965.57             | 532.72             |
| A_68_P24060290 | chr5:124699281-124699325                          | NM_001081323:79158    | Mphosph9      | DOWNSTREAM             | 0.990                                                        | 0.532                          | 1306.41            | 695.41             | 0.527                          | 1070.33            | 563.93             |
| A_68_P21629316 | chr2:130187590-130187634                          | NM_001110513:65938    | Ebf4          | INSIDE                 | 0.990                                                        | 0.350                          | 2339.71            | 818.71             | 0.346                          | 1700.05            | 588.91             |
| A_68_P20556964 | chr1:121317183-121317227                          | NM_008381:1621        | Inlbb         | INSIDE                 | 0.990                                                        | 0.529                          | 2600.39            | 1375.52            | 0.524                          | 1928.41            | 1009.92            |
| A_68_P20198786 | chr1:45852431-45852475                            | NM_028599:107         | Wdr75         | INSIDE                 | 0.990                                                        | 0.395                          | 1269.37            | 501.69             | 0.391                          | 972.18             | 380.23             |
| A_68_P32224193 | chr19:60302406-60302450                           | NM_029648:172         | D19ErtD737e   | INSIDE                 | 0.989                                                        | 0.388                          | 1536.17            | 596.78             | 0.384                          | 1253.23            | 481.32             |
| A_68_P30381574 | chr15:81958410-81958454                           | NM_172428:81          | Ccdc134       | INSIDE                 | 0.989                                                        | 0.523                          | 2483.56            | 1299.53            | 0.517                          | 1879.25            | 972.37             |
| A_68_P30378506 | chr15:81416769-81416813                           | NM_177821:147         | Ep300         | INSIDE                 | 0.989                                                        | 0.163                          | 2701.68            | 439.25             | 0.161                          | 2042.16            | 328.39             |
| A_68_P28184671 | chr11:120319473-120319517                         | NM_152807:52          | Ccdc137       | INSIDE                 | 0.989                                                        | 0.246                          | 2383.09            | 586.16             | 0.243                          | 1639.09            | 398.57             |
| A_68_P28153582 | chr11:115309493-115309537                         | NM_001033775:7656     | 4933422H20Rik | INSIDE                 | 0.989                                                        | 1.622                          | 984.84             | 1597.02            | 1.605                          | 728.54             | 1168.97            |
| A_68_P27687432 | chr11:32113340-32113384                           | NM_010117:8931        | Rbbdf1        | INSIDE                 | 0.989                                                        | 2.409                          | 1640.62            | 3951.48            | 2.382                          | 1238.79            | 2951.17            |
| A_68_P27568687 | chr11:6375581-6375625                             | NM_011221:318         | Purb          | INSIDE                 | 0.989                                                        | 2.681                          | 677.42             | 1815.87            | 2.651                          | 535.21             | 1418.87            |
| A_68_P27497669 | chr10:119912366-119912410                         | NM_010441:1603        | Hmga2         | INSIDE                 | 0.989                                                        | 0.447                          | 1079.75            | 482.88             | 0.442                          | 750.27             | 331.95             |
| A_68_P26864197 | chr9:117949927-117949971                          | NM_001048146:332      | Azi2          | INSIDE                 | 0.989                                                        | 4.595                          | 509.25             | 2339.77            | 4.545                          | 472.56             | 2147.83            |
| A_68_P26234164 | chr8:125075343-125075387                          | NM_001037298:-135     | Fam38a        | PROMOTER               | 0.989                                                        | 0.400                          | 1186.33            | 474.44             | 0.395                          | 1005.39            | 397.62             |
| A_68_P26227636 | chr8:124114791-124114835                          | NM_026160:445         | Map11c3b      | INSIDE                 | 0.989                                                        | 0.496                          | 1275.73            | 633.06             | 0.491                          | 1007.82            | 494.62             |
| A_68_P23694281 | chr5:52759674-52759718                            | NM_011435:4654        | Sod3          | INSIDE                 | 0.989                                                        | 1.724                          | 1194.76            | 2059.78            | 1.706                          | 1000.37            | 1706.46            |
| A_68_P21928446 | chr3:7366713-7366757                              | NM_008862:131         | Pkia          | INSIDE                 | 0.989                                                        | 1.984                          | 1844.37            | 3660.02            | 1.962                          | 1570.00            | 3080.56            |
| A_68_P32562270 | chrX:98255164-98255208                            | NM_031384:-208        | Tex11         | PROMOTER               | 0.988                                                        | 2.323                          | 793.02             | 1842.35            | 2.296                          | 1106.18            | 2539.38            |
| A_68_P32130261 | chr19:44144105-44144149                           | NM_145502:50          | Erlin1        | INSIDE                 | 0.988                                                        | 0.461                          | 1666.28            | 768.91             | 0.456                          | 1458.31            | 664.90             |
| A_68_P31292451 | chr17:64212897-64212941                           | ENSMUST0000005753:222 |               | INSIDE                 | 0.988                                                        | 0.355                          | 2280.08            | 809.79             | 0.351                          | 1730.10            | 607.23             |
| A_68_P30601341 | chr16:23108146-23108190                           | NR_030705:-857        | Snord2        | PROMOTER               | 0.988                                                        | 0.536                          | 1332.59            | 714.55             | 0.530                          | 1108.31            | 587.09             |
| A_68_P29613101 | chr14:55196302-55196346                           | NM_010590:174         | Jub           | INSIDE                 | 0.988                                                        | 0.362                          | 4062.01            | 1470.31            | 0.358                          | 2991.48            | 1069.58            |
| A_68_P28729566 | chr12:109940197-109940241                         | NM_001171002:298      | Degs2         | INSIDE                 | 0.988                                                        | 0.423                          | 1201.55            | 508.21             | 0.418                          | 885.33             | 370.05             |
| A_68_P27800934 | chr11:52578718-52578762                           | NM_177059:533         | Fstl4         | INSIDE                 | 0.988                                                        | 0.602                          | 4333.41            | 2606.59            | 0.594                          | 3160.74            | 1878.73            |
| A_68_P27188397 | chr10:62349624-62349668                           | NM_027384:-6884       | Tet1          | PROMOTER               | 0.988                                                        | 0.288                          | 1584.95            | 455.95             | 0.284                          | 1373.13            | 390.08             |
| A_68_P26924748 | chr10:8238264-8238308                             | NM_177387:337         | Ust           | INSIDE                 | 0.988                                                        | 0.498                          | 2088.44            | 1040.16            | 0.492                          | 1623.53            | 798.87             |
| A_68_P26752042 | chr9:97266348-97266392                            | NM_030219:4007        | Trim42        | INSIDE                 | 0.988                                                        | 2.157                          | 1752.90            | 3781.11            | 2.130                          | 1466.92            | 3125.26            |
| A_68_P26554372 | chr9:59464905-59464949                            | NM_001205239:-164     | Parp6         | PROMOTER               | 0.988                                                        | 0.636                          | 1627.27            | 1034.76            | 0.628                          | 1306.18            | 820.39             |
| A_68_P25950855 | chr8:72807002-72807046                            | NM_001146153:127      | Homer3        | INSIDE                 | 0.988                                                        | 0.327                          | 3313.83            | 1082.30            | 0.323                          | 2466.64            | 796.27             |
| A_68_P25351155 | chr7:104728838-104728882                          | NM_001081267:455      | Rsfl          | INSIDE                 | 0.988                                                        | 0.403                          | 2370.22            | 954.47             | 0.398                          | 2012.74            | 800.73             |

| ProbeName      | Target position of probe on CpG island microarray | TargetID               | GeneSymbol    | CpG island Description | Ratio of relative methylation (TiO <sub>2</sub> -NP/Vehicle) | Sham group                     |                    |                    | TiO <sub>2</sub> -H group      |                    |                    |
|----------------|---------------------------------------------------|------------------------|---------------|------------------------|--------------------------------------------------------------|--------------------------------|--------------------|--------------------|--------------------------------|--------------------|--------------------|
|                |                                                   |                        |               |                        |                                                              | Relative methylation (Cy5/Cy3) | Cy3 signal (Input) | Cy5 signal (MeDIP) | Relative methylation (Cy5/Cy3) | Cy3 signal (Input) | Cy5 signal (MeDIP) |
| A_68_P25045003 | chr7:35461137-35461181                            | NM_175140:136572       | Chst8         | INSIDE                 | 0.988                                                        | 0.374                          | 1707.25            | 639.02             | 0.370                          | 1372.77            | 507.53             |
| A_68_P23815272 | chr5:76732745-76732789                            | NM_007715:807          | Clock         | INSIDE                 | 0.988                                                        | 1.765                          | 971.64             | 1715.17            | 1.744                          | 827.22             | 1442.30            |
| A_68_P22862461 | chr4:41445320-41445364                            | NM_001085515:4767      | AI464131      | INSIDE                 | 0.988                                                        | 0.503                          | 2350.67            | 1182.06            | 0.497                          | 1671.93            | 830.52             |
| A_68_P22609446 | chr3:145239414-145239458                          | NM_001081094:265       | Zhbt6         | INSIDE                 | 0.988                                                        | 1.478                          | 3622.39            | 5352.19            | 1.460                          | 2787.50            | 4071.02            |
| A_68_P20864296 | chr1:180458833-180458877                          | NM_001161665:401       | Kif26b        | PROMOTER               | 0.988                                                        | 0.475                          | 1401.74            | 666.27             | 0.470                          | 1078.61            | 506.77             |
| A_68_P20250405 | chr1:57029997-57030046                            | NR_024325:1709         | 9130024F11Rik | INSIDE                 | 0.988                                                        | 3.842                          | 369.19             | 1418.34            | 3.795                          | 274.46             | 1041.70            |
| A_68_P32579167 | chrX:102274990-102275034                          | NM_026312:101          | 2610029G23Rik | DIVERGENT_PROMOTER     | 0.987                                                        | 2.990                          | 224.98             | 672.70             | 2.951                          | 255.84             | 754.91             |
| A_68_P31929500 | chr19:5567652-5567696                             | NM_001033448:399       | Gm962         | DIVERGENT_PROMOTER     | 0.987                                                        | 1.750                          | 1711.33            | 2994.97            | 1.726                          | 1320.27            | 2279.39            |
| A_68_P31876071 | chr18:82575755-82575799                           | NM_008082:393          | Galr1         | INSIDE                 | 0.987                                                        | 0.300                          | 2735.73            | 821.46             | 0.296                          | 2112.57            | 625.83             |
| A_68_P31541315 | chr18:20904732-20904776                           | NM_019737:151          | B4gal6        | INSIDE                 | 0.987                                                        | 0.291                          | 3884.24            | 1128.80            | 0.287                          | 2652.22            | 760.43             |
| A_68_P30498005 | chr15:102300845-102300889                         | NM_001103165:196       | Pcbp2         | PROMOTER               | 0.987                                                        | 0.481                          | 1185.21            | 569.87             | 0.475                          | 901.90             | 428.13             |
| A_68_P30397290 | chr15:84684091-84684135                           | NM_001081166:2447      | Phf21b        | INSIDE                 | 0.987                                                        | 1.902                          | 1239.48            | 2357.30            | 1.876                          | 909.82             | 1707.17            |
| A_68_P29147535 | chr13:74946041-74946085                           | NM_009817:693          | Cast          | PROMOTER               | 0.987                                                        | 1.715                          | 3327.62            | 5705.86            | 1.693                          | 2650.86            | 4488.47            |
| A_68_P28185233 | chr11:120410651-120410695                         | NM_001033231:369       | Fam195b       | INSIDE                 | 0.987                                                        | 5.152                          | 2420.08            | 12467.56           | 5.085                          | 2735.06            | 13907.61           |
| A_68_P26785470 | chr9:103267147-103267191                          | NM_001134427:141       | Cdv3          | INSIDE                 | 0.987                                                        | 0.325                          | 2169.33            | 704.01             | 0.320                          | 1712.76            | 548.34             |
| A_68_P26699327 | chr9:86358534-86358578                            | NM_027394:33           | Ube2cbp       | DIVERGENT_PROMOTER     | 0.987                                                        | 1.881                          | 1406.09            | 2645.35            | 1.856                          | 1175.44            | 2181.69            |
| A_68_P26337051 | chr9:18277941-18277985                            | NM_028935:41           | Zfp558        | INSIDE                 | 0.987                                                        | 0.239                          | 4827.73            | 1153.34            | 0.236                          | 3513.11            | 828.64             |
| A_68_P26153108 | chr8:111316106-111316150                          | NM_007496:77585        | Zfxh3         | INSIDE                 | 0.987                                                        | 1.864                          | 1050.92            | 1958.44            | 1.839                          | 825.44             | 1518.18            |
| A_68_P24603555 | chr6:85137374-85137418                            | NM_010131:528          | Emx1          | PROMOTER               | 0.987                                                        | 0.126                          | 4959.15            | 626.89             | 0.125                          | 3577.41            | 446.55             |
| A_68_P23894277 | chr5:92864276-92864320                            | NM_183392:73           | Nup54         | PROMOTER               | 0.987                                                        | 0.373                          | 1934.87            | 722.40             | 0.368                          | 1361.72            | 501.73             |
| A_68_P23404230 | chr4:149461292-149461336                          | NM_177366:297          | Gpr157        | PROMOTER               | 0.987                                                        | 0.168                          | 6738.02            | 1131.12            | 0.166                          | 4481.78            | 742.31             |
| A_68_P23294940 | chr4:128782954-128782998                          | NM_025452:203          | Tmem54        | INSIDE                 | 0.987                                                        | 0.474                          | 2616.80            | 1240.73            | 0.468                          | 2111.03            | 988.25             |
| A_68_P22210771 | chr3:67386632-67386676                            | NM_025813:35           | Mfsd1         | PROMOTER               | 0.987                                                        | 2.231                          | 886.14             | 1977.31            | 2.202                          | 637.41             | 1403.72            |
| A_68_P21257458 | chr2:60122109-60122153                            | NM_025422:345          | Cd302         | INSIDE                 | 0.987                                                        | 1.580                          | 1911.25            | 3020.52            | 1.560                          | 1529.41            | 2385.96            |
| A_68_P21138488 | chr2:36058729-36058773                            | ENSMUST00000138755:409 |               | INSIDE                 | 0.987                                                        | 1.401                          | 2506.05            | 3512.16            | 1.383                          | 1916.68            | 2650.72            |
| A_68_P20885895 | chr1:184212870-184212914                          | NM_007853:2            | Degs1         | PROMOTER               | 0.987                                                        | 7.937                          | 553.97             | 4396.81            | 7.835                          | 469.21             | 3676.22            |
| A_68_P20743649 | chr1:158489100-158489144                          | NM_001136104:205       | Abi2          | INSIDE                 | 0.987                                                        | 0.461                          | 1295.60            | 597.45             | 0.455                          | 1055.80            | 480.75             |
| A_68_P29218728 | chr13:91601752-91601796                           | NM_024186:1073         | Ssbp2         | INSIDE                 | 0.986                                                        | 0.306                          | 1755.57            | 537.48             | 0.302                          | 1481.09            | 447.23             |
| A_68_P28556955 | chr12:78063502-78063546                           | NM_001146176:289       | Max           | PROMOTER               | 0.986                                                        | 0.234                          | 2109.01            | 494.33             | 0.231                          | 1594.61            | 368.63             |
| A_68_P28313704 | chr12:29237167-29237211                           | NM_001177964:3986      | Dcdc2c        | PROMOTER               | 0.986                                                        | 2.642                          | 945.93             | 2498.71            | 2.606                          | 821.31             | 2140.07            |
| A_68_P27899471 | chr11:70027749-70027793                           | NM_153081:359          | Slc16a11      | INSIDE                 | 0.986                                                        | 0.487                          | 1251.98            | 609.09             | 0.480                          | 901.18             | 432.44             |
| A_68_P26142248 | chr8:109459632-109459676                          | NM_009229:5            | Sntb2         | INSIDE                 | 0.986                                                        | 0.450                          | 1551.10            | 697.70             | 0.443                          | 1245.64            | 552.20             |
| A_68_P25656208 | chr8:11555566-11555610                            | NM_011919:477          | Ing1          | DIVERGENT_PROMOTER     | 0.986                                                        | 1.847                          | 1005.91            | 1858.27            | 1.821                          | 747.95             | 1362.08            |
| A_68_P25592836 | chr7:149268658-149268702                          | NM_008748:12509        | Dusp8         | INSIDE                 | 0.986                                                        | 1.672                          | 1968.06            | 3291.14            | 1.649                          | 1412.25            | 2328.85            |
| A_68_P23435438 | chr4:154358119-154358163                          | NM_001113360:26953     | Pfch2         | INSIDE                 | 0.986                                                        | 2.314                          | 830.47             | 1921.54            | 2.282                          | 597.88             | 1364.27            |
| A_68_P23323337 | chr4:134090955-134090999                          | NM_029759:2309         | Fam54b        | PROMOTER               | 0.986                                                        | 1.655                          | 749.81             | 1241.12            | 1.631                          | 716.01             | 1168.08            |
| A_68_P22407408 | chr3:107399047-107399091                          | NM_007441:1120         | Alx3          | INSIDE                 | 0.986                                                        | 0.534                          | 1339.37            | 714.87             | 0.526                          | 991.94             | 522.10             |
| A_68_P21604382 | chr2:125548878-125548922                          | NM_199022:984          | Shc4          | INSIDE                 | 0.986                                                        | 0.293                          | 1628.47            | 477.40             | 0.289                          | 1242.70            | 359.13             |
| A_68_P21106324 | chr2:30837544-30837588                            | NM_144885:105          | BC005624      | DIVERGENT_PROMOTER     | 0.986                                                        | 0.160                          | 4203.49            | 671.72             | 0.157                          | 2591.07            | 408.08             |
| A_68_P20936667 | chr1:193007287-193007331                          | NM_007498:96           | Atf3          | PROMOTER               | 0.986                                                        | 0.318                          | 3683.55            | 1170.57            | 0.313                          | 2811.58            | 880.79             |
| A_68_P31381746 | chr17:80605842-80605886                           | NM_001195485:781       | Srsf7         | INSIDE                 | 0.985                                                        | 0.554                          | 1522.80            | 844.20             | 0.546                          | 1263.86            | 690.24             |
| A_68_P31259473 | chr17:57136900-57136944                           | NM_025538:161          | Alkbh7        | INSIDE                 | 0.985                                                        | 3.078                          | 1037.07            | 3192.57            | 3.034                          | 785.21             | 2382.16            |
| A_68_P30230312 | chr15:54921904-54921948                           | NM_183089:107          | Dscc1         | INSIDE                 | 0.985                                                        | 0.536                          | 1084.26            | 581.16             | 0.528                          | 1038.64            | 548.53             |
| A_68_P28577471 | chr12:81858975-81859019                           | NM_001008423:2706      | Gm1568        | INSIDE                 | 0.985                                                        | 2.868                          | 465.55             | 1335.36            | 2.825                          | 455.41             | 1286.44            |
| A_68_P28107255 | chr11:107331346-107331390                         | NM_145823:666          | Pitpnc1       | INSIDE                 | 0.985                                                        | 0.450                          | 2094.22            | 942.42             | 0.443                          | 1667.27            | 739.25             |
| A_68_P28042990 | chr11:96064768-96064813                           | NM_008267:9116         | Hoxb13        | DOWNSTREAM             | 0.985                                                        | 0.198                          | 4765.13            | 941.44             | 0.195                          | 3120.98            | 607.09             |
| A_68_P27551371 | chr11:3231882-3231926                             | NM_178149:1171         | Pik3ip1       | INSIDE                 | 0.985                                                        | 0.461                          | 1142.51            | 527.10             | 0.455                          | 924.51             | 420.26             |
| A_68_P27283562 | chr10:79958458-79958502                           | NM_139226:830          | Onecut3       | INSIDE                 | 0.985                                                        | 2.025                          | 861.50             | 1744.34            | 1.994                          | 738.93             | 1473.45            |
| A_68_P26258434 | chr8:129118421-129118465                          | NM_001164598:1106      | Lf2bp2        | PROMOTER               | 0.985                                                        | 1.821                          | 768.59             | 1399.84            | 1.794                          | 633.38             | 1136.17            |
| A_68_P25025138 | chr7:29849498-29849542                            | NM_009109:60650        | Ryr1          | INSIDE                 | 0.985                                                        | 2.721                          | 1836.04            | 4996.04            | 2.680                          | 1591.59            | 4265.61            |
| A_68_P24325868 | chr6:29297894-29297938                            | NM_007594:202          | Calu          | PROMOTER               | 0.985                                                        | 0.400                          | 1645.30            | 657.96             | 0.394                          | 1425.29            | 561.30             |
| A_68_P22859648 | chr4:40895242-40895286                            | NM_001171739:63        | Bag1          | INSIDE                 | 0.985                                                        | 0.590                          | 1236.28            | 729.05             | 0.581                          | 1005.98            | 584.56             |
| A_68_P21601163 | chr2:125073424-125073468                          | NM_023595:196          | Dut           | INSIDE                 | 0.985                                                        | 0.144                          | 3779.79            | 545.91             | 0.142                          | 2529.56            | 359.98             |
| A_68_P21067995 | chr2:24618544-24618589                            | NM_001042528:1         | Cacna1b       | INSIDE                 | 0.985                                                        | 1.961                          | 1361.18            | 2669.11            | 1.932                          | 1132.38            | 2187.50            |
| A_68_P32266423 | chrX:13063488-13063532                            | NM_173415:18713        | Nyx           | INSIDE                 | 0.984                                                        | 4.832                          | 577.25             | 2789.30            | 4.754                          | 614.34             | 2920.72            |
| A_68_P29964718 | chr14:123382401-123382445                         | NM_028651:61           | Tmtc4         | INSIDE                 | 0.984                                                        | 0.484                          | 1894.60            | 916.85             | 0.476                          | 1750.91            | 833.90             |
| A_68_P29257132 | chr13:99125852-99125896                           | NM_008242:1675         | Foxd1         | INSIDE                 | 0.984                                                        | 4.770                          | 607.78             | 2898.99            | 4.692                          | 437.31             | 2051.91            |
| A_68_P28307256 | chr12:28026486-28026530                           | NM_009234:1075         | Sox11         | INSIDE                 | 0.984                                                        | 1.556                          | 1120.84            | 1743.91            | 1.532                          | 969.07             | 1484.20            |
| A_68_P28183224 | chr11:120095621-120095666                         | NM_198423:1383         | Bahce1        | INSIDE                 | 0.984                                                        | 0.376                          | 2594.25            | 974.18             | 0.369                          | 1811.50            | 669.03             |
| A_68_P27284472 | chr10:80097247-80097291                           | NM_001159591:4868      | Csnk1g2       | INSIDE                 | 0.984                                                        | 1.850                          | 2925.38            | 5410.49            | 1.821                          | 2028.77            | 3693.81            |
| A_68_P27176492 | chr10:60215582-60215626                           | NM_023596:74           | Slc29a3       | PROMOTER               | 0.984                                                        | 2.348                          | 5329.35            | 12513.99           | 2.311                          | 3978.86            | 9196.00            |
| A_68_P25837690 | chr8:47826399-47826443                            | NM_008391:1322         | Lrf1          | INSIDE                 | 0.984                                                        | 0.531                          | 1924.59            | 1022.34            | 0.523                          | 1644.00            | 859.42             |
| A_68_P25022020 | chr7:29244408-29244453                            | NM_001141921:7174      | Lfrn1         | INSIDE                 | 0.984                                                        | 3.119                          | 1244.59            | 3881.81            | 3.068                          | 976.27             | 2995.22            |
| A_68_P24172984 | chr5:148118315-148118359                          | NM_007673:489          | Cdx2          | INSIDE                 | 0.984                                                        | 0.561                          | 1180.16            | 662.11             | 0.552                          | 1044.12            | 576.17             |
| A_68_P24137288 | chr5:140212139-140212183                          | NM_174850:127          | Mical2        | INSIDE                 | 0.984                                                        | 0.553                          | 1653.77            | 914.61             | 0.544                          | 1220.65            | 664.15             |

| ProbeName      | Target position of probe on CpG island microarray | TargetID                | GeneSymbol    | CpG island Description | Ratio of relative methylation (TiO <sub>2</sub> -NP/Vehicle) | Sham group                     |                    |                    | TiO <sub>2</sub> -H group      |                    |                    |
|----------------|---------------------------------------------------|-------------------------|---------------|------------------------|--------------------------------------------------------------|--------------------------------|--------------------|--------------------|--------------------------------|--------------------|--------------------|
|                |                                                   |                         |               |                        |                                                              | Relative methylation (Cy5/Cy3) | Cy3 signal (Input) | Cy5 signal (MeDIP) | Relative methylation (Cy5/Cy3) | Cy3 signal (Input) | Cy5 signal (MeDIP) |
| A_68_P24131499 | chr5:139230499-139230543                          | NM_030565:-514          | Fam20c        | PROMOTER               | 0.984                                                        | 0.535                          | 1620.83            | 867.73             | 0.527                          | 1308.26            | 688.91             |
| A_68_P23544555 | chr5:24414575-24414619                            | NM_001170555:-269       | Prkag2        | PROMOTER               | 0.984                                                        | 3.078                          | 409.95             | 1261.78            | 3.027                          | 338.05             | 1023.38            |
| A_68_P21565426 | chr2:118503248-118503292                          | NM_001145854:-289       | Pak6          | INSIDE                 | 0.984                                                        | 0.528                          | 2314.21            | 1222.38            | 0.520                          | 1778.23            | 923.91             |
| A_68_P21395951 | chr2:84877360-84877404                            | NM_001136081:-225       | Ssrp1         | PROMOTER               | 0.984                                                        | 0.353                          | 4033.12            | 1424.60            | 0.348                          | 2760.44            | 959.69             |
| A_68_P30939796 | chr16:87455183-87455227                           | NM_024258:-25           | Usp16         | PROMOTER               | 0.983                                                        | 0.401                          | 1403.37            | 562.81             | 0.394                          | 1134.25            | 447.29             |
| A_68_P29410630 | chr14:13173724-13173771                           | NM_080433:4632          | Fezf2         | DOWNSTREAM             | 0.983                                                        | 0.517                          | 1079.98            | 558.01             | 0.508                          | 813.73             | 413.12             |
| A_68_P28189252 | chr11:121066090-121066134                         | NM_025402:-150          | 1110031102Rik | DIVERGENT_PROMOTER     | 0.983                                                        | 0.387                          | 3324.06            | 1287.27            | 0.381                          | 2442.39            | 929.66             |
| A_68_P27994976 | chr11:87405943-87405987                           | NM_133215:246           | Mtmr4         | INSIDE                 | 0.983                                                        | 0.513                          | 1092.94            | 560.46             | 0.504                          | 833.30             | 420.14             |
| A_68_P27805841 | chr11:53449799-53449843                           | NM_008355:-1616         | Il13          | PROMOTER               | 0.983                                                        | 0.376                          | 1563.06            | 587.04             | 0.369                          | 1178.04            | 434.78             |
| A_68_P27177057 | chr10:60293808-60293852                           | NM_029770:499           | Unc5b         | INSIDE                 | 0.983                                                        | 0.492                          | 1244.74            | 612.86             | 0.484                          | 962.60             | 466.13             |
| A_68_P26467230 | chr9:44169640-44169684                            | NM_027889:91            | Vps11         | INSIDE                 | 0.983                                                        | 0.332                          | 2855.23            | 948.16             | 0.326                          | 2098.93            | 685.18             |
| A_68_P25953913 | chr8:73292527-73292571                            | NM_008841:8063          | Pik3r2        | INSIDE                 | 0.983                                                        | 3.326                          | 1304.02            | 4337.55            | 3.270                          | 957.66             | 3131.75            |
| A_68_P24459354 | chr6:53770780-53770824                            | NM_025817:17            | Tril          | INSIDE                 | 0.983                                                        | 0.261                          | 1939.26            | 506.67             | 0.257                          | 1431.59            | 367.86             |
| A_68_P23363266 | chr4:140864579-140864623                          | NM_010139:7446          | Epha2         | INSIDE                 | 0.983                                                        | 2.953                          | 626.66             | 1850.67            | 2.904                          | 580.77             | 1686.52            |
| A_68_P22293166 | chr3:84619656-84619700                            | NM_00117773:180         | Fbxw7         | INSIDE                 | 0.983                                                        | 0.586                          | 2468.72            | 1446.33            | 0.576                          | 1746.50            | 1005.72            |
| A_68_P22082265 | chr3:40754710-40754754                            | NM_001040399:180        | Larp1b        | INSIDE                 | 0.983                                                        | 0.543                          | 2924.82            | 1587.21            | 0.533                          | 2494.10            | 1329.82            |
| A_68_P27561410 | chr11:49994111-4999455                            | NM_177370:-8            | Rhbdd3        | DIVERGENT_PROMOTER     | 0.982                                                        | 0.537                          | 1149.61            | 617.17             | 0.527                          | 870.18             | 458.76             |
| A_68_P27284096 | chr10:80039600-80039644                           | NM_078477:419           | Klf16         | INSIDE                 | 0.982                                                        | 2.532                          | 1551.90            | 3928.80            | 2.486                          | 1156.86            | 2876.24            |
| A_68_P27230711 | chr10:70062739-70062783                           | NM_178621:-721          | Phyhipl       | PROMOTER               | 0.982                                                        | 1.939                          | 1214.00            | 2353.70            | 1.905                          | 871.41             | 1659.69            |
| A_68_P27186303 | chr10:61949193-61949237                           | NM_001113355:132        | Vps26a        | INSIDE                 | 0.982                                                        | 19.271                         | 902.17             | 17385.40           | 18.922                         | 1101.64            | 20845.29           |
| A_68_P25311412 | chr7:97279241-97279285                            | NM_146194:521           | Picalm        | INSIDE                 | 0.982                                                        | 0.195                          | 7380.66            | 1438.65            | 0.191                          | 5682.40            | 1087.51            |
| A_68_P24623658 | chr6:88674283-88674327                            | NM_001166249:-101       | Mgll          | PROMOTER               | 0.982                                                        | 2.002                          | 1818.73            | 3641.88            | 1.967                          | 1436.60            | 2825.92            |
| A_68_P24155676 | chr5:144014658-144014702                          | NM_017467:17021         | Zfp316        | INSIDE                 | 0.982                                                        | 0.527                          | 3464.54            | 1824.31            | 0.517                          | 2374.77            | 1228.26            |
| A_68_P24098220 | chr5:131916295-131916339                          | NM_177047:1101897       | Aut52         | INSIDE                 | 0.982                                                        | 1.909                          | 826.33             | 1577.78            | 1.874                          | 799.09             | 1497.55            |
| A_68_P23600185 | chr5:35731082-35731126                            | NM_010445:-661          | Hmx1          | PROMOTER               | 0.982                                                        | 0.478                          | 1853.85            | 885.98             | 0.469                          | 1282.49            | 601.71             |
| A_68_P23438947 | chr4:154866365-154866409                          | NM_001160016:917        | Gnb1          | INSIDE                 | 0.982                                                        | 0.413                          | 2673.04            | 1104.72            | 0.406                          | 1993.24            | 809.21             |
| A_68_P23397602 | chr4:148312906-148312950                          | NM_027195:134428        | Cas2l         | INSIDE                 | 0.982                                                        | 1.514                          | 1739.35            | 2633.29            | 1.487                          | 1210.76            | 1800.65            |
| A_68_P23280751 | chr4:126234084-126234128                          | NM_175554:-117          | Clspn         | PROMOTER               | 0.982                                                        | 6.564                          | 1414.28            | 9282.76            | 6.444                          | 1182.14            | 7618.30            |
| A_68_P23237282 | chr4:117587476-117587521                          | NM_146152:106           | Ipo13         | INSIDE                 | 0.982                                                        | 0.230                          | 3441.20            | 791.42             | 0.226                          | 2373.76            | 536.06             |
| A_68_P21680283 | chr2:139502974-139503018                          | NM_001126490:-917       | Ism1          | PROMOTER               | 0.982                                                        | 0.250                          | 2641.28            | 659.68             | 0.245                          | 2044.11            | 501.37             |
| A_68_P30836891 | chr16:67620592-67620636                           | NM_001145977:539        | Cadm2         | INSIDE                 | 0.981                                                        | 0.303                          | 1739.90            | 526.84             | 0.297                          | 1290.43            | 383.41             |
| A_68_P30421542 | chr15:88668084-88668130                           | ENSMUST00000083457:2377 |               | DOWNSTREAM             | 0.981                                                        | 2.143                          | 434.70             | 931.47             | 2.103                          | 342.75             | 720.68             |
| A_68_P29239505 | chr13:95992702-95992746                           | NM_001170669:281        | Pde8b         | INSIDE                 | 0.981                                                        | 0.393                          | 1291.96            | 507.68             | 0.386                          | 950.86             | 366.61             |
| A_68_P27788208 | chr11:50191636-50191680                           | NM_021510:438           | Hnnrph1       | INSIDE                 | 0.981                                                        | 0.435                          | 1305.38            | 567.63             | 0.426                          | 1125.27            | 479.81             |
| A_68_P27286931 | chr10:80484539-80484583                           | NM_145217:3562          | Diras1        | INSIDE                 | 0.981                                                        | 0.626                          | 2638.15            | 1650.69            | 0.614                          | 2176.56            | 1336.54            |
| A_68_P25960681 | chr8:74842613-74842657                            | NM_008452:-326          | Klf2          | PROMOTER               | 0.981                                                        | 0.332                          | 2773.23            | 920.07             | 0.326                          | 1913.55            | 622.98             |
| A_68_P24993062 | chr7:19979665-19979709                            | NM_007949:12299         | Erec2         | INSIDE                 | 0.981                                                        | 2.834                          | 283.32             | 802.89             | 2.779                          | 249.95             | 694.73             |
| A_68_P24799555 | chr6:120615920-120615964                          | NM_001128151:496        | Ceer2         | PROMOTER               | 0.981                                                        | 0.339                          | 4352.05            | 1473.92            | 0.332                          | 2947.30            | 979.35             |
| A_68_P24634270 | chr6:90666488-90666532                            | NM_001134383:13         | Iqsec1        | INSIDE                 | 0.981                                                        | 0.466                          | 1062.58            | 495.51             | 0.458                          | 893.28             | 408.72             |
| A_68_P23882637 | chr5:90794553-90794599                            | NM_030886:635           | Ankrd17       | INSIDE                 | 0.981                                                        | 0.481                          | 4299.72            | 2066.05            | 0.471                          | 3289.14            | 1550.17            |
| A_68_P23402407 | chr4:149147586-149147630                          | NM_027460:768           | Slc25a33      | INSIDE                 | 0.981                                                        | 0.408                          | 1311.38            | 535.20             | 0.400                          | 1174.67            | 470.24             |
| A_68_P22407409 | chr3:107399162-107399206                          | NM_007441:1236          | Alx3          | INSIDE                 | 0.981                                                        | 0.253                          | 2096.96            | 529.90             | 0.248                          | 1497.63            | 371.30             |
| A_68_P22246603 | chr3:75360626-75360670                            | NM_019745:73            | Pded10        | INSIDE                 | 0.981                                                        | 0.339                          | 2207.83            | 748.68             | 0.333                          | 1756.41            | 584.21             |
| A_68_P21768465 | chr2:155755929-155755973                          | NM_018888:96            | Uqcc          | INSIDE                 | 0.981                                                        | 0.296                          | 2370.49            | 702.42             | 0.291                          | 1639.64            | 476.82             |
| A_68_P21666842 | chr2:136941472-136941517                          | NM_013822:762           | Jag1          | INSIDE                 | 0.981                                                        | 3.656                          | 235.19             | 859.77             | 3.586                          | 270.22             | 969.06             |
| A_68_P21486502 | chr2:103810841-103810885                          | NM_001142335:419        | Lmo2          | INSIDE                 | 0.981                                                        | 0.272                          | 2061.16            | 559.91             | 0.266                          | 1663.30            | 443.26             |
| A_68_P20188963 | chr1:43503219-43503263                            | NM_010879:645           | Nck2          | INSIDE                 | 0.981                                                        | 0.336                          | 1974.31            | 662.65             | 0.329                          | 1581.80            | 520.78             |
| A_68_P31610612 | chr18:34166849-34166893                           | NM_013512:-10           | Epb4.114a     | PROMOTER               | 0.980                                                        | 0.334                          | 1340.58            | 447.49             | 0.327                          | 998.01             | 326.58             |
| A_68_P31254141 | chr17:56279185-56279230                           | NM_013662:-5932         | Sema6b        | PROMOTER               | 0.980                                                        | 2.856                          | 398.79             | 1139.13            | 2.799                          | 336.14             | 940.73             |
| A_68_P31120336 | chr17:28217206-28217250                           | NM_013687:301           | Tcp11         | INSIDE                 | 0.980                                                        | 11.632                         | 23862.29           | 277570.80          | 11.397                         | 21770.90           | 248112.30          |
| A_68_P30579148 | chr16:18343878-18343922                           | NM_138583:125           | D16H22S680E   | INSIDE                 | 0.980                                                        | 1.636                          | 3032.10            | 4961.91            | 1.604                          | 2426.32            | 3890.88            |
| A_68_P29620064 | chr14:56444394-56444438                           | NM_001168346:785        | Nfatc4        | INSIDE                 | 0.980                                                        | 1.866                          | 1049.85            | 1958.66            | 1.829                          | 940.58             | 1719.85            |
| A_68_P29515882 | chr14:32973351-32973395                           | NM_019744:-5605         | Ncoa4         | PROMOTER               | 0.980                                                        | 0.207                          | 3049.95            | 631.97             | 0.203                          | 2345.43            | 476.06             |
| A_68_P29098141 | chr13:64375668-64375712                           | NM_172587:606           | Cdc14b        | INSIDE                 | 0.980                                                        | 0.426                          | 1026.65            | 437.46             | 0.418                          | 852.11             | 355.91             |
| A_68_P29055170 | chr13:55565739-55565783                           | NM_001030296:133        | Prr7          | INSIDE                 | 0.980                                                        | 0.420                          | 1241.81            | 521.25             | 0.411                          | 901.92             | 370.83             |
| A_68_P28974244 | chr13:40833219-40833263                           | NM_011547:-4048         | Tcfap2a       | PROMOTER               | 0.980                                                        | 0.349                          | 1417.95            | 495.43             | 0.342                          | 1449.53            | 496.22             |
| A_68_P25475986 | chr7:129008469-129008513                          | NM_011325:-134          | Scnn1b        | PROMOTER               | 0.980                                                        | 0.359                          | 3423.13            | 1227.66            | 0.352                          | 2581.34            | 907.59             |
| A_68_P24791292 | chr6:119058938-119058982                          | NM_001159533:-753       | Cacna1c       | PROMOTER               | 0.980                                                        | 0.410                          | 1322.36            | 541.53             | 0.401                          | 1019.84            | 409.38             |
| A_68_P23971132 | chr5:108741872-108741916                          | NM_001081234:-49        | Pigg          | PROMOTER               | 0.980                                                        | 0.396                          | 1346.16            | 533.44             | 0.388                          | 1007.71            | 391.32             |
| A_68_P22924772 | chr4:53727484-53727528                            | NM_139309:453           | Fktn          | INSIDE                 | 0.980                                                        | 0.475                          | 1559.84            | 741.10             | 0.466                          | 1279.37            | 595.79             |
| A_68_P21906997 | chr2:180628640-180628684                          | NR_029538:-82           | Mir124a-3     | PROMOTER               | 0.980                                                        | 0.575                          | 3424.20            | 1968.28            | 0.563                          | 2930.09            | 1650.72            |
| A_68_P21150018 | chr2:38567376-38567420                            | NM_139051:2664          | Nr5a1         | INSIDE                 | 0.980                                                        | 0.153                          | 5659.54            | 867.68             | 0.150                          | 3692.27            | 554.64             |
| A_68_P20502876 | chr1:107253429-107253473                          | NM_001160368:-163       | Rnf152        | PROMOTER               | 0.980                                                        | 2.914                          | 944.56             | 2752.88            | 2.856                          | 705.62             | 2015.23            |
| A_68_P32823846 | chrX:166435801-166435845                          | NM_183151:118269        | Mid1          | DOWNSTREAM             | 0.979                                                        | 2.367                          | 3903.15            | 9240.01            | 2.318                          | 3583.66            | 8307.91            |
| A_68_P32389692 | chrX:51278036-51278080                            | ENSMUST00000120892:-92  |               | PROMOTER               | 0.979                                                        | 1.552                          | 1002.20            | 1555.60            | 1.519                          | 1340.27            | 2035.97            |

| ProbeName      | Target position of probe on CpG island microarray | TargetID                | GeneSymbol    | CpG island Description | Ratio of relative methylation (TiO <sub>2</sub> -NP/Vehicle) | Sham group                     |                    |                    | TiO <sub>2</sub> -H group      |                    |                    |
|----------------|---------------------------------------------------|-------------------------|---------------|------------------------|--------------------------------------------------------------|--------------------------------|--------------------|--------------------|--------------------------------|--------------------|--------------------|
|                |                                                   |                         |               |                        |                                                              | Relative methylation (Cy5/Cy3) | Cy3 signal (Input) | Cy5 signal (MeDIP) | Relative methylation (Cy5/Cy3) | Cy3 signal (Input) | Cy5 signal (MeDIP) |
| A_68_P31936818 | chr19:7015888-7015932                             | NM_001177360:-227       | Gpr137        | PROMOTER               | 0.979                                                        | 0.518                          | 2201.55            | 1141.37            | 0.508                          | 1671.55            | 848.52             |
| A_68_P31613233 | chr18:34665967-34666011                           | NM_146084:489           | Fam13b        | INSIDE                 | 0.979                                                        | 0.617                          | 1760.23            | 1086.76            | 0.604                          | 1456.34            | 880.00             |
| A_68_P30250406 | chr15:58655527-58655571                           | NM_175212:-566          | Tmem65        | PROMOTER               | 0.979                                                        | 1.641                          | 1804.28            | 2960.60            | 1.607                          | 1494.50            | 2401.46            |
| A_68_P29982185 | chr15:5093533-5093577                             | NM_001013367:-306       | Prkaa1        | PROMOTER               | 0.979                                                        | 2.517                          | 737.40             | 1856.30            | 2.465                          | 588.62             | 1451.22            |
| A_68_P28737719 | chr12:111558035-111558079                         | AK200124:417495         |               | INSIDE                 | 0.979                                                        | 2.407                          | 1314.13            | 3162.59            | 2.355                          | 1012.57            | 2384.52            |
| A_68_P28099138 | chr11:105881660-105881704                         | NM_001037712:12166      | Kcnh6         | INSIDE                 | 0.979                                                        | 0.174                          | 3747.94            | 652.07             | 0.170                          | 2697.78            | 459.47             |
| A_68_P28085167 | chr11:103274059-103274103                         | NM_183034:-102          | Plekhhm1      | PROMOTER               | 0.979                                                        | 3.064                          | 783.91             | 2402.00            | 3.000                          | 550.70             | 1652.25            |
| A_68_P26883519 | chr9:121363673-121363717                          | NM_175114:87619         | Trak1         | INSIDE                 | 0.979                                                        | 2.013                          | 1054.23            | 2121.75            | 1.971                          | 853.84             | 1683.10            |
| A_68_P25954770 | chr8:73416471-73416515                            | NM_053248:164           | Slc5a5        | INSIDE                 | 0.979                                                        | 1.815                          | 1247.97            | 2265.10            | 1.776                          | 968.23             | 1719.90            |
| A_68_P25952924 | chr8:73125225-73125269                            | NM_133772:6967          | Ssbp4         | INSIDE                 | 0.979                                                        | 0.569                          | 1777.53            | 1010.89            | 0.557                          | 1421.24            | 791.46             |
| A_68_P25842219 | chr8:48618727-48618771                            | NM_177240:76            | D030016E14Rik | INSIDE                 | 0.979                                                        | 1.943                          | 2049.63            | 3982.68            | 1.901                          | 1688.76            | 3211.07            |
| A_68_P25614882 | chr8:3631030-3631074                              | NM_011503:-107          | Stxbp2        | DIVERGENT_PROMOTER     | 0.979                                                        | 3.252                          | 2495.51            | 8116.61            | 3.185                          | 1902.77            | 6060.31            |
| A_68_P25535522 | chr7:139788929-139788973                          | NM_009123:2370          | Nkx1-2        | INSIDE                 | 0.979                                                        | 0.381                          | 4299.73            | 1638.41            | 0.373                          | 3258.97            | 1216.12            |
| A_68_P24763851 | chr6:114081597-114081641                          | NM_172890:384           | Slc6a11       | INSIDE                 | 0.979                                                        | 0.559                          | 1331.81            | 744.61             | 0.547                          | 1120.54            | 613.32             |
| A_68_P23399809 | chr4:148681348-148681392                          | NM_207682:437           | Kif1b         | INSIDE                 | 0.979                                                        | 3.856                          | 294.73             | 1136.59            | 3.777                          | 297.86             | 1124.91            |
| A_68_P22748787 | chr4:15076098-15076142                            | NM_178617:158           | Necab1        | INSIDE                 | 0.979                                                        | 0.181                          | 4573.01            | 827.64             | 0.177                          | 3365.00            | 596.05             |
| A_68_P21152002 | chr2:38921329-38921376                            | NM_029793:-426          | Golga1        | PROMOTER               | 0.979                                                        | 2.087                          | 516.99             | 1079.05            | 2.043                          | 499.20             | 1019.71            |
| A_68_P20350462 | chr1:74829643-74829687                            | NM_009526:11199         | Wnt6          | INSIDE                 | 0.979                                                        | 1.504                          | 1641.69            | 2469.17            | 1.473                          | 1355.63            | 1997.03            |
| A_68_P20005795 | chr1:4482172-4482216                              | NM_011441:4300          | Sox17         | INSIDE                 | 0.979                                                        | 2.140                          | 1106.13            | 2366.64            | 2.095                          | 960.09             | 2011.34            |
| A_68_P33011727 | A_68_P33011727                                    |                         |               | Unknown                | 0.978                                                        | 3.984                          | 278.84             | 1110.83            | 3.897                          | 163.05             | 635.32             |
| A_68_P32016036 | chr19:23209577-23209625                           | NM_010638:-6115         | Klf9          | PROMOTER               | 0.978                                                        | 0.491                          | 1520.92            | 746.72             | 0.480                          | 1258.37            | 604.30             |
| A_68_P30665016 | chr16:34573818-34573862                           | ENSMUST00000114961:-222 |               | PROMOTER               | 0.978                                                        | 2.342                          | 699.16             | 1637.69            | 2.291                          | 501.06             | 1147.83            |
| A_68_P30385944 | chr15:82817919-82817963                           | ENSMUST00000170562:4641 |               | INSIDE                 | 0.978                                                        | 0.381                          | 2644.40            | 1006.92            | 0.373                          | 1975.82            | 736.11             |
| A_68_P30344615 | chr15:76011854-76011898                           | NM_201394:14264         | Plec          | INSIDE                 | 0.978                                                        | 5.954                          | 940.74             | 5600.75            | 5.824                          | 832.44             | 4847.96            |
| A_68_P27854128 | chr11:62271118-62271162                           | NM_011308:-306          | Ncor1         | DIVERGENT_PROMOTER     | 0.978                                                        | 2.252                          | 695.96             | 1567.35            | 2.203                          | 498.81             | 1099.03            |
| A_68_P27083333 | chr10:40022153-40022197                           | NM_009665:-180          | Amd1          | PROMOTER               | 0.978                                                        | 0.443                          | 2133.40            | 945.90             | 0.433                          | 1698.85            | 736.38             |
| A_68_P25261273 | chr7:86611105-86611149                            | NM_017462:33            | Polg          | INSIDE                 | 0.978                                                        | 2.472                          | 1184.33            | 2928.17            | 2.417                          | 1004.32            | 2427.76            |
| A_68_P24126250 | chr5:137972865-137972909                          | NM_010312:1571          | Gnb2          | INSIDE                 | 0.978                                                        | 0.403                          | 1798.77            | 725.36             | 0.394                          | 1411.33            | 556.75             |
| A_68_P23576173 | chr5:31357375-31357419                            | NM_023525:213           | Cad           | INSIDE                 | 0.978                                                        | 0.568                          | 3119.98            | 1771.19            | 0.555                          | 2211.33            | 1227.16            |
| A_68_P23006655 | chr4:70196033-70196077                            | NM_172694:-92           | Megf9         | PROMOTER               | 0.978                                                        | 0.382                          | 1263.03            | 482.08             | 0.373                          | 1023.32            | 381.93             |
| A_68_P22311242 | chr3:87803722-87803766                            | NM_007529:534           | Bean          | INSIDE                 | 0.978                                                        | 2.111                          | 615.51             | 1299.29            | 2.064                          | 584.57             | 1206.69            |
| A_68_P31257220 | chr17:56743025-56743069                           | NM_001163300:18642      | Safb          | INSIDE                 | 0.977                                                        | 1.871                          | 1423.76            | 2664.53            | 1.829                          | 1164.79            | 2130.59            |
| A_68_P30128579 | chr15:34373192-34373236                           | NM_001163485:-183       | Rpl30         | DIVERGENT_PROMOTER     | 0.977                                                        | 0.324                          | 2059.38            | 667.51             | 0.317                          | 1513.69            | 479.26             |
| A_68_P29110672 | chr13:68720676-68720720                           | NM_172480:300           | Mirr          | INSIDE                 | 0.977                                                        | 0.400                          | 1497.49            | 598.34             | 0.391                          | 1135.32            | 443.36             |
| A_68_P28156584 | chr11:115836130-115836174                         | NM_001005608:114        | Ilgb4         | INSIDE                 | 0.977                                                        | 0.363                          | 1331.77            | 483.67             | 0.355                          | 1090.21            | 386.76             |
| A_68_P28039697 | chr11:95448158-95448202                           | NM_033217:832           | Ngfr          | INSIDE                 | 0.977                                                        | 0.483                          | 3585.50            | 1730.71            | 0.472                          | 2594.19            | 1223.77            |
| A_68_P27924776 | chr11:75008459-75008503                           | NM_177708:986           | Rtn4r1        | INSIDE                 | 0.977                                                        | 0.606                          | 2650.04            | 1607.21            | 0.593                          | 1887.17            | 1118.30            |
| A_68_P26853660 | chr9:116084560-116084604                          | NM_009371:-101          | Tgfb2         | PROMOTER               | 0.977                                                        | 0.475                          | 1601.93            | 761.66             | 0.464                          | 1190.40            | 552.86             |
| A_68_P26254629 | chr8:128435054-128435098                          | NM_145608:727           | BC021891      | INSIDE                 | 0.977                                                        | 1.794                          | 896.32             | 1608.28            | 1.753                          | 748.48             | 1311.82            |
| A_68_P26001984 | chr8:83404065-83404109                            | NM_021356:292           | Gab1          | INSIDE                 | 0.977                                                        | 0.540                          | 2077.51            | 1121.30            | 0.527                          | 1760.00            | 928.29             |
| A_68_P25988741 | chr8:80959478-80959522                            | NM_138944:1051          | Pou4f2        | INSIDE                 | 0.977                                                        | 2.507                          | 4104.47            | 10288.33           | 2.448                          | 3179.60            | 7784.32            |
| A_68_P25581873 | chr7:147222902-147222946                          | NM_027201:635           | Zfp511        | INSIDE                 | 0.977                                                        | 2.773                          | 2115.31            | 5865.20            | 2.708                          | 1523.08            | 4124.82            |
| A_68_P25507198 | chr7:134913587-134913631                          | NM_198424:280           | Orai3         | INSIDE                 | 0.977                                                        | 0.499                          | 1395.15            | 696.63             | 0.488                          | 1052.03            | 513.30             |
| A_68_P24981713 | chr7:17062092-17062136                            | NM_008718:15            | Npas1         | INSIDE                 | 0.977                                                        | 2.772                          | 940.04             | 2605.42            | 2.706                          | 804.01             | 2176.04            |
| A_68_P24432032 | chr6:49269455-49269499                            | NM_175098:125           | Ccdc126       | INSIDE                 | 0.977                                                        | 0.574                          | 1147.58            | 659.20             | 0.561                          | 945.78             | 530.97             |
| A_68_P23145547 | chr4:99322966-99323010                            | NM_010425:-1            | Foxd3         | PROMOTER               | 0.977                                                        | 1.647                          | 1143.62            | 1883.77            | 1.609                          | 1022.65            | 1645.52            |
| A_68_P21809532 | chr2:162769099-162769143                          | NM_001081338:-80        | L3mbtl1       | PROMOTER               | 0.977                                                        | 0.320                          | 2302.30            | 736.54             | 0.313                          | 1638.13            | 512.07             |
| A_68_P21322068 | chr2:71711196-71711241                            | NM_172665:-110          | Pdk1          | PROMOTER               | 0.977                                                        | 1.965                          | 1413.83            | 2778.28            | 1.921                          | 1097.20            | 2107.45            |
| A_68_P20735709 | chr1:156930520-156930564                          | ENSMUST00000128143:-146 |               | PROMOTER               | 0.977                                                        | 0.352                          | 4882.19            | 1720.37            | 0.344                          | 3680.70            | 1267.72            |
| A_68_P31619488 | chr18:35821775-35821819                           | NM_029485:44            | Spat24        | INSIDE                 | 0.976                                                        | 0.387                          | 2499.69            | 966.40             | 0.377                          | 1917.31            | 723.15             |
| A_68_P31465579 | chr18:4922163-4922209                             | ENSMUST00000143254:463  |               | INSIDE                 | 0.976                                                        | 0.535                          | 1477.85            | 790.89             | 0.522                          | 1062.24            | 554.76             |
| A_68_P31220005 | chr17:49071091-49071135                           | NM_027452:-794          | Lrfn2         | PROMOTER               | 0.976                                                        | 0.284                          | 1917.95            | 543.98             | 0.277                          | 1398.92            | 387.22             |
| A_68_P28175482 | chr11:118906328-118906372                         | NM_013926:-4123         | Cbx8          | PROMOTER               | 0.976                                                        | 2.235                          | 853.13             | 1906.61            | 2.181                          | 743.19             | 1621.21            |
| A_68_P25503174 | chr7:134093374-134093418                          | NM_001039645:-301       | Asphd1        | DIVERGENT_PROMOTER     | 0.976                                                        | 0.459                          | 1045.13            | 479.83             | 0.448                          | 812.14             | 363.94             |
| A_68_P25377920 | chr7:109399308-109399352                          | NM_019566:-698          | Rhog          | PROMOTER               | 0.976                                                        | 0.490                          | 2648.75            | 1297.72            | 0.478                          | 2041.60            | 976.30             |
| A_68_P23553583 | chr5:27144126-27144170                            | NM_010075:252           | Dpp6          | INSIDE                 | 0.976                                                        | 0.494                          | 1249.38            | 616.80             | 0.482                          | 1131.44            | 545.43             |
| A_68_P23523161 | chr5:20388465-20388509                            | NM_177601:216           | Tmem60        | INSIDE                 | 0.976                                                        | 0.592                          | 1230.74            | 728.25             | 0.577                          | 1022.97            | 590.52             |
| A_68_P23329327 | chr4:135129537-135129581                          | NM_001013756:-23        | Grlh3         | PROMOTER               | 0.976                                                        | 0.454                          | 1086.66            | 493.14             | 0.443                          | 852.54             | 377.67             |
| A_68_P23322289 | chr4:133899035-133899079                          | NM_001039677:72         | Slc30a2       | INSIDE                 | 0.976                                                        | 1.682                          | 2626.71            | 4419.38            | 1.642                          | 2077.78            | 3412.48            |
| A_68_P21823222 | chr2:165151741-165151785                          | NM_207705:-9369         | Elmo2         | PROMOTER               | 0.976                                                        | 0.331                          | 2314.55            | 765.24             | 0.323                          | 1850.86            | 597.46             |
| A_68_P20804420 | chr1:169238624-169238668                          | NM_001039483:-154       | Tmco1         | PROMOTER               | 0.976                                                        | 0.411                          | 1384.14            | 569.33             | 0.402                          | 1043.89            | 419.27             |
| A_68_P20456912 | chr1:95582245-95582289                            | NM_016778:-4            | Bok           | PROMOTER               | 0.976                                                        | 0.439                          | 1174.76            | 515.45             | 0.428                          | 1002.68            | 429.42             |
| A_68_P32533270 | chrX:90542781-90542825                            | NM_007492:10818         | Arx           | INSIDE                 | 0.975                                                        | 3.473                          | 446.68             | 1551.54            | 3.387                          | 462.79             | 1567.57            |
| A_68_P31637164 | chr18:39152519-39152563                           | NM_175164:-258          | Arhgap26      | PROMOTER               | 0.975                                                        | 0.502                          | 1273.11            | 638.83             | 0.489                          | 1146.80            | 561.30             |
| A_68_P31193443 | chr17:44325522-44325566                           | NM_172621:24            | Clic5         | INSIDE                 | 0.975                                                        | 0.416                          | 1567.81            | 652.81             | 0.406                          | 1159.27            | 470.69             |

| ProbeName      | Target position of probe on CpG island microarray | TargetID                | GeneSymbol | CpG island Description | Ratio of relative methylation (TiO <sub>2</sub> -NP/Vehicle) | Sham group                     |                    |                    | TiO <sub>2</sub> -H group      |                    |                    |
|----------------|---------------------------------------------------|-------------------------|------------|------------------------|--------------------------------------------------------------|--------------------------------|--------------------|--------------------|--------------------------------|--------------------|--------------------|
|                |                                                   |                         |            |                        |                                                              | Relative methylation (Cy5/Cy3) | Cy3 signal (Input) | Cy5 signal (McDIP) | Relative methylation (Cy5/Cy3) | Cy3 signal (Input) | Cy5 signal (McDIP) |
| A_68_P30356786 | chr15:77786446-77786490                           | NM_001017983:684        | Foxred2    | INSIDE                 | 0.975                                                        | 0.519                          | 1400.12            | 726.69             | 0.506                          | 992.93             | 502.67             |
| A_68_P28520553 | chr12:71554139-71554183                           | NM_028339:20            | Tmx1       | INSIDE                 | 0.975                                                        | 0.731                          | 3144.58            | 2298.20            | 0.713                          | 2377.65            | 1694.10            |
| A_68_P27541278 | chr10:127848946-127848990                         | NM_001164237:297        | Rnf41      | INSIDE                 | 0.975                                                        | 0.599                          | 3589.64            | 2149.10            | 0.584                          | 2778.07            | 1622.03            |
| A_68_P27357766 | chr10:93610580-93610624                           | NM_0011629:73           | Nr2c1      | PROMOTER               | 0.975                                                        | 0.461                          | 5685.89            | 2621.72            | 0.450                          | 3848.71            | 1731.01            |
| A_68_P26239786 | chr8:125935222-125935266                          | NM_023279:-219          | Tubb3      | PROMOTER               | 0.975                                                        | 0.387                          | 1938.20            | 750.09             | 0.377                          | 1524.40            | 575.41             |
| A_68_P25957674 | chr8:74115987-74116031                            | NM_025396:-74           | Pgls       | PROMOTER               | 0.975                                                        | 0.541                          | 1609.98            | 870.29             | 0.527                          | 1047.52            | 552.11             |
| A_68_P25909601 | chr7:52262939-52262983                            | NM_001008422:8659       | Scaf1      | INSIDE                 | 0.975                                                        | 1.776                          | 2523.24            | 4481.77            | 1.732                          | 1842.63            | 3192.16            |
| A_68_P24138664 | chr5:140449200-140449245                          | NM_175522:65326         | Elfn1      | INSIDE                 | 0.975                                                        | 2.863                          | 1300.98            | 3724.33            | 2.790                          | 1009.83            | 2817.75            |
| A_68_P23250422 | chr4:119955245-119955289                          | NM_194600:4600          | Foxo6      | INSIDE                 | 0.975                                                        | 0.619                          | 2131.00            | 1318.14            | 0.603                          | 1740.46            | 1049.41            |
| A_68_P22869764 | chr4:43071791-43071835                            | NM_001081413:-43        | Unc13b     | PROMOTER               | 0.975                                                        | 0.298                          | 1554.94            | 464.07             | 0.291                          | 1257.25            | 365.73             |
| A_68_P22029170 | chr3:30494111-30494155                            | NM_029690:4660          | Arpm1      | DOWNSTREAM             | 0.975                                                        | 0.393                          | 2479.65            | 974.33             | 0.383                          | 1779.61            | 682.11             |
| A_68_P21810975 | chr2:163029586-163029630                          | ENSMUST00000128999:-680 |            | PROMOTER               | 0.975                                                        | 0.301                          | 9098.31            | 2734.07            | 0.293                          | 6010.83            | 1762.00            |
| A_68_P31624334 | chr18:36675661-36675705                           | NM_010415:-223          | Hbegf      | PROMOTER               | 0.974                                                        | 0.350                          | 2283.37            | 798.47             | 0.340                          | 1487.08            | 506.32             |
| A_68_P30379304 | chr15:81560230-81560274                           | NM_001146174:97         | Rangap1    | INSIDE                 | 0.974                                                        | 0.181                          | 4300.97            | 777.85             | 0.176                          | 2937.66            | 517.41             |
| A_68_P30345427 | chr15:75834015-75834059                           | NM_001168253:5892       | Fam83h     | INSIDE                 | 0.974                                                        | 2.242                          | 683.33             | 1532.07            | 2.184                          | 627.00             | 1369.52            |
| A_68_P29218723 | chr13:91600897-91600941                           | NM_024186:217           | Ssbp2      | INSIDE                 | 0.974                                                        | 4.104                          | 4254.02            | 17458.76           | 3.998                          | 3224.82            | 12891.71           |
| A_68_P28743067 | chr12:112513239-112513283                         | NM_033603:3939          | Amm        | INSIDE                 | 0.974                                                        | 0.281                          | 2425.46            | 680.66             | 0.273                          | 1697.13            | 463.88             |
| A_68_P28450015 | chr12:56085848-56085892                           | NM_013815:1453          | Baz1a      | INSIDE                 | 0.974                                                        | 0.205                          | 2720.96            | 557.79             | 0.200                          | 2167.29            | 432.57             |
| A_68_P27930792 | chr11:76056879-76056923                           | NM_026029:301           | Glod4      | INSIDE                 | 0.974                                                        | 0.312                          | 1459.58            | 455.57             | 0.304                          | 1118.29            | 340.02             |
| A_68_P27903934 | chr11:70832798-70832842                           | NM_033562:-55           | Derl2      | DIVERGENT_PROMOTER     | 0.974                                                        | 0.205                          | 2335.58            | 478.46             | 0.199                          | 1764.95            | 351.99             |
| A_68_P27228312 | chr10:69652108-69652156                           | NM_001111121:92264      | Ccdc6      | INSIDE                 | 0.974                                                        | 2.120                          | 859.06             | 1820.79            | 2.064                          | 712.64             | 1470.57            |
| A_68_P26905361 | chr10:4540405-4540449                             | NM_025995:-649          | Fbxo5      | PROMOTER               | 0.974                                                        | 1.635                          | 2536.94            | 4148.90            | 1.593                          | 2196.86            | 3498.55            |
| A_68_P26822033 | chr9:110019921-110019966                          | NM_133347:-1857         | Dhx30      | PROMOTER               | 0.974                                                        | 0.300                          | 2711.25            | 814.67             | 0.293                          | 2206.03            | 645.71             |
| A_68_P25956587 | chr8:73900036-73900080                            | NM_010150:5793          | Nr2f6      | INSIDE                 | 0.974                                                        | 0.365                          | 1652.46            | 621.76             | 0.366                          | 1260.56            | 461.98             |
| A_68_P25724986 | chr8:26149210-26149254                            | NM_001081187:202        | Htra4      | INSIDE                 | 0.974                                                        | 0.476                          | 3578.72            | 1662.65            | 0.453                          | 2711.29            | 1227.00            |
| A_68_P25502656 | chr7:134006226-134006271                          | NM_172746:763           | Hirip3     | INSIDE                 | 0.974                                                        | 0.272                          | 1701.10            | 461.89             | 0.265                          | 1282.57            | 339.36             |
| A_68_P25411821 | chr7:117265997-117266041                          | NM_009516:446           | Wee1       | INSIDE                 | 0.974                                                        | 0.425                          | 1242.41            | 527.47             | 0.413                          | 952.84             | 393.93             |
| A_68_P25360312 | chr7:106331247-106331291                          | NM_026384:-45           | Dgat2      | PROMOTER               | 0.974                                                        | 1.694                          | 837.04             | 1418.35            | 1.651                          | 703.80             | 1161.87            |
| A_68_P23984908 | chr5:1111714055-111714099                         | NM_024477:405255        | Ttc28      | INSIDE                 | 0.974                                                        | 1.651                          | 1131.77            | 1868.97            | 1.609                          | 1020.50            | 1642.01            |
| A_68_P23203783 | chr4:109656467-109656511                          | NM_172296:5859          | Dmrt2      | DOWNSTREAM             | 0.974                                                        | 5.118                          | 1654.09            | 8465.50            | 4.987                          | 1347.31            | 6719.03            |
| A_68_P21796151 | chr2:160472451-160472495                          | NM_009408:840           | Top1       | INSIDE                 | 0.974                                                        | 0.585                          | 2274.02            | 1330.52            | 0.570                          | 1860.83            | 1060.65            |
| A_68_P20639341 | chr1:137326555-137326604                          | NM_153774:489           | Ipo9       | INSIDE                 | 0.974                                                        | 1.861                          | 2588.46            | 4816.26            | 1.812                          | 2044.19            | 3703.53            |
| A_68_P33005898 | A_68_P33005898                                    |                         |            | Unknown                | 0.973                                                        | 3.916                          | 314.20             | 1230.54            | 3.812                          | 237.00             | 903.35             |
| A_68_P32582404 | chrX:103207170-103207214                          | NM_001190409:46         | Magt1      | INSIDE                 | 0.973                                                        | 1.590                          | 1347.94            | 2143.82            | 1.548                          | 1687.09            | 2610.99            |
| A_68_P31924878 | chr19:4756662-4756706                             | NM_025717:160           | Rbm4b      | INSIDE                 | 0.973                                                        | 2.359                          | 3267.28            | 7705.89            | 2.294                          | 2405.91            | 5520.08            |
| A_68_P31868008 | chr18:81171137-81171181                           | NM_178280:12159         | Sall3      | INSIDE                 | 0.973                                                        | 3.243                          | 928.16             | 3009.60            | 3.156                          | 848.87             | 2678.71            |
| A_68_P31213522 | chr17:47809817-47809861                           | NM_198421:42200         | Usp49      | INSIDE                 | 0.973                                                        | 0.422                          | 1580.68            | 667.53             | 0.411                          | 1078.40            | 442.99             |
| A_68_P27806467 | chr11:53584134-53584178                           | NM_001159396:182        | Irf1       | INSIDE                 | 0.973                                                        | 0.306                          | 2147.95            | 657.93             | 0.298                          | 1660.67            | 494.88             |
| A_68_P26571039 | chr9:62384681-62384725                            | NM_175484:149           | Coro2b     | INSIDE                 | 0.973                                                        | 13.842                         | 14038.20           | 194315.00          | 13.474                         | 12010.59           | 161832.50          |
| A_68_P25949499 | chr8:72567227-72567271                            | NM_027481:537           | Supp1      | INSIDE                 | 0.973                                                        | 0.335                          | 1823.82            | 611.27             | 0.326                          | 1303.76            | 425.06             |
| A_68_P25512010 | chr7:135831942-135831986                          | NM_178641:77086         | Inpp5f     | INSIDE                 | 0.973                                                        | 3.137                          | 1243.85            | 3901.55            | 3.052                          | 1030.14            | 3143.78            |
| A_68_P25471450 | chr7:128125237-128125281                          | NM_007672:568           | Cdr2       | INSIDE                 | 0.973                                                        | 0.466                          | 1557.01            | 725.81             | 0.454                          | 1193.61            | 541.42             |
| A_68_P25092989 | chr7:52671296-52671340                            | NM_198190:2254          | Ntf5       | INSIDE                 | 0.973                                                        | 0.488                          | 2260.10            | 1102.18            | 0.474                          | 1627.83            | 772.24             |
| A_68_P24153575 | chr5:143582152-143582196                          | NM_001122730:-3108      | Tnrc18     | PROMOTER               | 0.973                                                        | 0.491                          | 1019.71            | 501.15             | 0.478                          | 820.41             | 392.42             |
| A_68_P23991447 | chr5:112755530-112755574                          | NM_018783:164           | Tfip11     | INSIDE                 | 0.973                                                        | 0.282                          | 3320.90            | 936.24             | 0.274                          | 2301.24            | 631.46             |
| A_68_P23313225 | chr4:132195134-132195178                          | NM_010166:186           | Eya3       | INSIDE                 | 0.973                                                        | 0.409                          | 3120.14            | 1276.66            | 0.398                          | 2510.82            | 999.37             |
| A_68_P21310713 | chr2:69561124-69561168                            | NM_001081086:2          | Ppig       | INSIDE                 | 0.973                                                        | 0.689                          | 2244.79            | 1546.19            | 0.670                          | 1812.95            | 1214.84            |
| A_68_P20566309 | chr1:123224172-123224218                          | NM_133748:145           | Insig2     | INSIDE                 | 0.973                                                        | 0.419                          | 1262.96            | 529.32             | 0.408                          | 967.21             | 394.42             |
| A_68_P31759172 | chr18:61851786-61851830                           | NM_019508:4220          | Il17b      | INSIDE                 | 0.972                                                        | 0.164                          | 3938.17            | 644.52             | 0.159                          | 2667.54            | 424.15             |
| A_68_P31600354 | chr18:32098983-32099027                           | NM_144862:7844          | Lims2      | INSIDE                 | 0.972                                                        | 3.435                          | 916.02             | 3146.59            | 3.337                          | 690.93             | 2305.92            |
| A_68_P30402203 | chr15:85502100-85502144                           | AK038224:-5049          |            | PROMOTER               | 0.972                                                        | 2.599                          | 398.70             | 1036.24            | 2.527                          | 283.87             | 717.36             |
| A_68_P30342959 | chr15:75447008-75447052                           | NM_001044718:-84        | Zfp41      | PROMOTER               | 0.972                                                        | 0.388                          | 2294.12            | 889.81             | 0.377                          | 1768.26            | 666.50             |
| A_68_P29964259 | chr14:123312516-123312560                         | NM_145466:-151          | A2ld1      | PROMOTER               | 0.972                                                        | 0.195                          | 3041.27            | 594.02             | 0.190                          | 2153.33            | 408.94             |
| A_68_P27890685 | chr11:68505258-68505302                           | NM_175260:-136          | Mylh10     | PROMOTER               | 0.972                                                        | 0.184                          | 2734.63            | 503.49             | 0.179                          | 1858.27            | 332.50             |
| A_68_P27306493 | chr10:84565965-84566009                           | NM_001013028:615        | Al597468   | INSIDE                 | 0.972                                                        | 0.256                          | 2190.40            | 561.41             | 0.249                          | 1761.35            | 438.73             |
| A_68_P27094092 | chr10:41997719-41997771                           | NM_019740:-1196         | Foxo3      | PROMOTER               | 0.972                                                        | 2.697                          | 313.42             | 845.27             | 2.621                          | 287.98             | 754.75             |
| A_68_P27034636 | chr10:29081810-29081854                           | NM_001110196:416        | Rnf146     | INSIDE                 | 0.972                                                        | 2.165                          | 447.28             | 968.55             | 2.106                          | 392.80             | 827.18             |
| A_68_P26826442 | chr9:110782965-110783009                          | NM_001146060:161        | Als2c1     | INSIDE                 | 0.972                                                        | 1.791                          | 751.65             | 1346.25            | 1.741                          | 662.90             | 1154.29            |
| A_68_P25086957 | chr7:51607437-51607481                            | NM_001034115:41825      | Shank1     | INSIDE                 | 0.972                                                        | 1.790                          | 1099.06            | 1967.32            | 1.740                          | 957.80             | 1666.47            |
| A_68_P24951463 | chr7:4946096-4946140                              | NM_026741:1585          | Zfp579     | INSIDE                 | 0.972                                                        | 2.645                          | 742.01             | 1962.79            | 2.570                          | 588.98             | 1513.62            |
| A_68_P24053126 | chr5:123402327-123402371                          | NM_001005866:36194      | Kdm2b      | INSIDE                 | 0.972                                                        | 0.306                          | 2548.37            | 779.99             | 0.298                          | 1991.35            | 592.59             |
| A_68_P23539568 | chr5:23536418-23536462                            | NM_053090:61            | Fam126a    | INSIDE                 | 0.972                                                        | 0.207                          | 2452.30            | 506.78             | 0.201                          | 1950.74            | 391.75             |
| A_68_P21877293 | chr2:174586128-174586172                          | NM_007903:-123          | Edn3       | PROMOTER               | 0.972                                                        | 1.865                          | 1205.57            | 2248.90            | 1.813                          | 950.62             | 1723.15            |
| A_68_P21150015 | chr2:38567109-38567153                            | NM_139051:2932          | Nr5a1      | INSIDE                 | 0.972                                                        | 0.659                          | 3245.91            | 2138.45            | 0.641                          | 2380.39            | 1524.65            |
| A_68_P21141628 | chr2:37214555-37214599                            | NM_026176:276           | Pdcl       | INSIDE                 | 0.972                                                        | 0.107                          | 6949.01            | 745.22             | 0.104                          | 5361.45            | 558.73             |

| ProbeName      | Target position of probe on CpG island microarray | TargetID               | GeneSymbol    | CpG island Description | Ratio of relative methylation (TiO <sub>2</sub> -NP/Vehicle) | Sham group                     |                    |                    | TiO <sub>2</sub> -H group      |                    |                    |
|----------------|---------------------------------------------------|------------------------|---------------|------------------------|--------------------------------------------------------------|--------------------------------|--------------------|--------------------|--------------------------------|--------------------|--------------------|
|                |                                                   |                        |               |                        |                                                              | Relative methylation (Cy5/Cy3) | Cy3 signal (Input) | Cy5 signal (MeDIP) | Relative methylation (Cy5/Cy3) | Cy3 signal (Input) | Cy5 signal (MeDIP) |
| A_68_P33007790 | chr4_random:128337-128381                         | NM_001033326:18557     | Dhrsx         | INSIDE                 | 0.971                                                        | 2.856                          | 7654.84            | 21860.49           | 2.773                          | 5724.42            | 15875.14           |
| A_68_P32266421 | chrX:13063192-13063236                            | NM_173415:18417        | Nyx           | INSIDE                 | 0.971                                                        | 1.967                          | 540.08             | 1062.52            | 1.911                          | 852.37             | 1628.75            |
| A_68_P30510787 | chr16:4558890-4558934                             | NM_031182:808          | Tefap4        | INSIDE                 | 0.971                                                        | 0.277                          | 7896.37            | 2186.80            | 0.269                          | 5231.36            | 1407.04            |
| A_68_P29421305 | chr14:15535746-15535790                           | NM_001033270:230       | Slc4a7        | INSIDE                 | 0.971                                                        | 4.894                          | 1341.45            | 6565.38            | 4.750                          | 1055.07            | 5011.96            |
| A_68_P29152745 | chr13:76193231-76193275                           | NM_175495:1192         | Gprl50        | INSIDE                 | 0.971                                                        | 0.497                          | 2026.67            | 1008.06            | 0.483                          | 1486.25            | 717.52             |
| A_68_P28186435 | chr11:120588296-120588340                         | NM_026428:277          | Dcxr          | INSIDE                 | 0.971                                                        | 0.317                          | 2945.34            | 935.08             | 0.308                          | 2078.75            | 640.76             |
| A_68_P27277401 | chr10:78996480-78996524                           | NM_015817:30           | Ppap2c        | INSIDE                 | 0.971                                                        | 0.242                          | 3547.12            | 859.64             | 0.235                          | 2597.03            | 611.44             |
| A_68_P27173118 | chr10:59681867-59681911                           | NM_016803:120          | Chst3         | INSIDE                 | 0.971                                                        | 0.444                          | 1091.08            | 483.97             | 0.431                          | 879.07             | 378.56             |
| A_68_P26926722 | chr10:8605525-8605569                             | NM_175155:322          | Sash1         | INSIDE                 | 0.971                                                        | 0.428                          | 1305.11            | 558.61             | 0.416                          | 981.34             | 407.97             |
| A_68_P24120339 | chr5:136751005-136751049                          | NM_198602:292249       | Cux1          | INSIDE                 | 0.971                                                        | 1.543                          | 1668.80            | 2574.83            | 1.498                          | 1209.37            | 1811.59            |
| A_68_P23222359 | chr4:114597578-114597622                          | NM_015758:1018         | Foxe3         | DOWNSTREAM             | 0.971                                                        | 10.221                         | 1414.73            | 14460.20           | 9.929                          | 1238.06            | 12292.31           |
| A_68_P22262791 | chr3:79090407-79090451                            | AK032506:-885          |               | PROMOTER               | 0.971                                                        | 0.171                          | 3072.80            | 526.98             | 0.167                          | 1964.42            | 327.14             |
| A_68_P22030181 | chr3:30692610-30692654                            | NM_027016:835          | Sec62         | INSIDE                 | 0.971                                                        | 0.547                          | 1239.77            | 678.45             | 0.531                          | 982.48             | 522.02             |
| A_68_P21784245 | chr2:158493692-158493736                          | NM_001159662:844       | Ppp1r16b      | INSIDE                 | 0.971                                                        | 0.361                          | 1440.40            | 520.44             | 0.351                          | 1226.40            | 430.46             |
| A_68_P21771129 | chr2:156247015-156247059                          | NM_001003815:249       | Epb4.1l1      | INSIDE                 | 0.971                                                        | 0.183                          | 3752.71            | 685.63             | 0.177                          | 2759.75            | 489.64             |
| A_68_P20596468 | chr1:129574040-129574084                          | NM_028135:536          | Tmem163       | INSIDE                 | 0.971                                                        | 0.425                          | 1578.40            | 671.57             | 0.413                          | 1198.36            | 494.96             |
| A_68_P20590468 | chr1:128389485-128389529                          | NM_172484:-2           | Nckap5        | PROMOTER               | 0.971                                                        | 0.528                          | 4286.25            | 2261.68            | 0.512                          | 3142.37            | 1609.78            |
| A_68_P32958525 | chr17:8627413-8627457                             | NM_009309:147          | T             | INSIDE                 | 0.970                                                        | 0.387                          | 2123.86            | 822.82             | 0.376                          | 1582.81            | 594.67             |
| A_68_P32471837 | chrX:72720884-72720928                            | ENSMUST00000117517:-44 |               | PROMOTER               | 0.970                                                        | 0.653                          | 2896.32            | 1892.69            | 0.634                          | 2780.83            | 1761.91            |
| A_68_P31932937 | chr19:6141281-6141325                             | NM_019722:-165         | Arl2          | PROMOTER               | 0.970                                                        | 3.120                          | 476.26             | 1486.16            | 3.027                          | 420.98             | 1274.41            |
| A_68_P31254158 | chr17:56281426-56281470                           | NM_001130456:-1682     | Sema6b        | PROMOTER               | 0.970                                                        | 0.205                          | 3082.14            | 632.75             | 0.199                          | 2216.25            | 441.48             |
| A_68_P27898299 | chr11:69795072-69795116                           | NM_018740:-357         | Rai12         | PROMOTER               | 0.970                                                        | 0.471                          | 1542.45            | 726.12             | 0.457                          | 1291.45            | 590.02             |
| A_68_P27843111 | chr1:60268470-60268514                            | NM_021354:374          | Drp2          | INSIDE                 | 0.970                                                        | 0.266                          | 1937.15            | 514.93             | 0.258                          | 1314.72            | 338.83             |
| A_68_P25087017 | chr7:51615474-51615518                            | NM_027049:14904        | 1700008003Rik | INSIDE                 | 0.970                                                        | 0.412                          | 1470.55            | 605.87             | 0.400                          | 1117.93            | 446.84             |
| A_68_P23190570 | chr4:107108505-107108549                          | NM_147221:1203         | Glis1         | INSIDE                 | 0.970                                                        | 2.011                          | 945.66             | 1901.56            | 1.951                          | 772.58             | 1507.31            |
| A_68_P23185485 | chr4:106295363-106295407                          | NM_177667:331          | Ttc22         | INSIDE                 | 0.970                                                        | 3.623                          | 160.30             | 580.70             | 3.515                          | 184.32             | 647.88             |
| A_68_P22609957 | chr3:145312789-145312833                          | NM_010516:139          | Cyr61         | INSIDE                 | 0.970                                                        | 0.460                          | 5103.59            | 2345.87            | 0.446                          | 3468.08            | 1546.66            |
| A_68_P21722816 | chr2:147019569-147019613                          | NM_001077632:-7452     | Nkx2-2        | PROMOTER               | 0.970                                                        | 0.311                          | 1663.11            | 517.57             | 0.302                          | 1225.83            | 369.90             |
| A_68_P20624276 | chr1:134777196-134777240                          | NM_010732:287          | Lrrn2         | INSIDE                 | 0.970                                                        | 0.464                          | 1575.55            | 730.52             | 0.450                          | 1180.58            | 531.12             |
| A_68_P20166595 | chr1:39633967-39634011                            | NM_001033135:204       | Rnf149        | INSIDE                 | 0.970                                                        | 0.532                          | 1149.86            | 611.40             | 0.516                          | 805.26             | 415.30             |
| A_68_P20076129 | chr1:21069175-21069219                            | NM_133252:94           | Tram2         | INSIDE                 | 0.970                                                        | 0.550                          | 1377.06            | 757.63             | 0.534                          | 1084.20            | 578.45             |
| A_68_P32078823 | chr19:34267097-34267141                           | NM_029682:359          | Stambp1l      | INSIDE                 | 0.969                                                        | 0.617                          | 3077.94            | 1897.90            | 0.598                          | 2249.35            | 1344.38            |
| A_68_P31378917 | chr17:80113203-80113247                           | NM_009994:1157         | Cyp1b1        | INSIDE                 | 0.969                                                        | 0.437                          | 1181.27            | 516.66             | 0.424                          | 850.98             | 360.71             |
| A_68_P30682388 | chr16:37777040-37777084                           | NM_008047:-78          | Fstl1         | PROMOTER               | 0.969                                                        | 0.421                          | 5028.19            | 2119.13            | 0.408                          | 3933.07            | 1606.19            |
| A_68_P30337596 | chr15:74347238-74347282                           | NM_174991:635          | Bai1          | INSIDE                 | 0.969                                                        | 0.463                          | 2005.45            | 929.03             | 0.449                          | 1526.10            | 685.25             |
| A_68_P28493820 | chr12:66174434-66174478                           | NM_013902:469          | Fkbp3         | INSIDE                 | 0.969                                                        | 0.711                          | 4529.57            | 3219.90            | 0.689                          | 3397.63            | 2341.54            |
| A_68_P27846979 | chr11:60988330-60988374                           | NM_001004143:209       | Usp22         | INSIDE                 | 0.969                                                        | 3.055                          | 623.06             | 1903.53            | 2.962                          | 570.20             | 1688.80            |
| A_68_P27794865 | chr11:51419667-51419711                           | NM_001048061:695       | Hmnpab        | INSIDE                 | 0.969                                                        | 0.594                          | 2680.75            | 1592.23            | 0.575                          | 2096.28            | 1206.24            |
| A_68_P27290578 | chr10:81033661-81033705                           | NM_019725:-4594        | Tle2          | PROMOTER               | 0.969                                                        | 0.479                          | 1103.27            | 528.96             | 0.465                          | 826.53             | 383.99             |
| A_68_P26996375 | chr10:21713739-21713783                           | NM_011361:-711         | Sgk1          | PROMOTER               | 0.969                                                        | 3.542                          | 515.87             | 1827.32            | 3.432                          | 402.08             | 1379.98            |
| A_68_P26540062 | chr9:56920055-56920099                            | NM_001110350:-4106     | Sin3a         | PROMOTER               | 0.969                                                        | 2.122                          | 1077.00            | 2285.41            | 2.056                          | 896.17             | 1842.24            |
| A_68_P24197924 | chr6:3151637-3151681                              | ENSMUST00000158475:442 |               | DOWNSTREAM             | 0.969                                                        | 3.177                          | 1027.37            | 3264.16            | 3.078                          | 880.18             | 2709.57            |
| A_68_P24011284 | chr5:116181838-116181882                          | NM_001080808:-292      | Ccdc64        | PROMOTER               | 0.969                                                        | 2.042                          | 2625.12            | 5360.79            | 1.980                          | 2176.31            | 4308.05            |
| A_68_P24008565 | chr5:115685846-115685890                          | NM_026398:9            | Pop5          | INSIDE                 | 0.969                                                        | 0.525                          | 1304.40            | 685.10             | 0.509                          | 1068.91            | 543.76             |
| A_68_P23567755 | chr5:29800608-29800652                            | NM_019944:4380         | Mnx1          | INSIDE                 | 0.969                                                        | 0.504                          | 2286.90            | 1151.80            | 0.488                          | 1812.14            | 884.51             |
| A_68_P23269837 | chr4:124386139-124386183                          | NM_029157:-5944        | St3a3         | PROMOTER               | 0.969                                                        | 0.375                          | 3115.43            | 1167.60            | 0.363                          | 2196.58            | 797.54             |
| A_68_P23185613 | chr4:106311998-106312042                          | NM_177667:16967        | Ttc22         | INSIDE                 | 0.969                                                        | 2.264                          | 772.43             | 1748.46            | 2.194                          | 695.39             | 1525.74            |
| A_68_P22210126 | chr3:67267629-67267673                            | NM_016753:179          | Lxn           | INSIDE                 | 0.969                                                        | 0.266                          | 2391.58            | 636.98             | 0.258                          | 1539.67            | 397.48             |
| A_68_P21570232 | chr2:119372907-119372951                          | NM_172857:435          | Exd1          | INSIDE                 | 0.969                                                        | 0.571                          | 1397.33            | 797.50             | 0.553                          | 1242.78            | 687.53             |
| A_68_P20940735 | chr1:193730717-193730761                          | NM_009579:79           | Slc30a1       | INSIDE                 | 0.969                                                        | 1.662                          | 1055.88            | 1754.70            | 1.611                          | 837.22             | 1348.79            |
| A_68_P20877313 | chr1:182627309-182627353                          | NM_013729:-165         | Mixd1         | PROMOTER               | 0.969                                                        | 0.372                          | 3850.26            | 1430.75            | 0.360                          | 2995.24            | 1078.74            |
| A_68_P32804787 | chrX:162608456-162608500                          | NM_146238:67           | Gemin8        | INSIDE                 | 0.968                                                        | 0.460                          | 2189.96            | 1007.29            | 0.445                          | 2819.69            | 1255.98            |
| A_68_P32148146 | chr19:47253257-47253301                           | NM_021360:-31          | Neur1a        | PROMOTER               | 0.968                                                        | 2.350                          | 778.65             | 1829.81            | 2.274                          | 640.69             | 1457.11            |
| A_68_P30969552 | chr16:92499533-92499577                           | NM_172469:1163         | Clic6         | INSIDE                 | 0.968                                                        | 0.448                          | 2077.59            | 931.67             | 0.434                          | 1770.48            | 768.86             |
| A_68_P30477055 | chr15:98701709-98701753                           | NM_001033276:-116      | Mil2          | PROMOTER               | 0.968                                                        | 0.318                          | 1430.89            | 454.72             | 0.308                          | 1118.95            | 344.23             |
| A_68_P29996525 | chr15:7765684-7765728                             | NM_010275:4696         | Gdnf          | INSIDE                 | 0.968                                                        | 0.519                          | 2898.75            | 1503.75            | 0.502                          | 2173.06            | 1091.31            |
| A_68_P29476962 | chr14:26197707-26197751                           | ENSMUST00000164287:393 |               | INSIDE                 | 0.968                                                        | 0.178                          | 4329.07            | 770.59             | 0.172                          | 2746.06            | 473.29             |
| A_68_P28605827 | chr12:87087211-87087255                           | NM_145447:-256         | Mfsd7c        | PROMOTER               | 0.968                                                        | 0.553                          | 1104.26            | 610.51             | 0.535                          | 872.69             | 467.16             |
| A_68_P28184738 | chr11:120328949-120328993                         | NM_001159328:22        | Hgs           | INSIDE                 | 0.968                                                        | 1.597                          | 1792.12            | 2862.51            | 1.546                          | 1435.11            | 2218.04            |
| A_68_P28056109 | chr11:98248090-98248134                           | NM_008890:167          | Pnmt          | INSIDE                 | 0.968                                                        | 0.536                          | 1937.88            | 1037.90            | 0.518                          | 1538.48            | 797.61             |
| A_68_P27894427 | chr11:69153780-69153824                           | NR_027827:-468         | A030009H04Rik | PROMOTER               | 0.968                                                        | 0.293                          | 3111.23            | 910.46             | 0.283                          | 2255.69            | 639.19             |
| A_68_P25735802 | chr8:28088218-28088262                            | NM_001101502:433       | Zfp703        | INSIDE                 | 0.968                                                        | 0.541                          | 2172.30            | 1175.94            | 0.524                          | 1729.34            | 905.89             |
| A_68_P22413520 | chr3:108394071-108394115                          | NM_181400:-103         | Wdr47         | PROMOTER               | 0.968                                                        | 0.350                          | 1800.60            | 630.37             | 0.339                          | 1415.56            | 479.64             |
| A_68_P22177975 | chr3:60305139-60305183                            | NM_020007:-13          | Mbnl1         | PROMOTER               | 0.968                                                        | 1.618                          | 881.24             | 1426.17            | 1.567                          | 785.99             | 1231.93            |
| A_68_P22085566 | chr3:41368578-41368622                            | NM_001130186:-201      | Phf17         | PROMOTER               | 0.968                                                        | 0.440                          | 1333.12            | 587.00             | 0.426                          | 979.01             | 417.31             |

| ProbeName      | Target position of probe on CpG island microarray | TargetID               | GeneSymbol    | CpG island Description | Ratio of relative methylation (TiO <sub>2</sub> -NP/Vehicle) | Sham group                     |                    |                    | TiO <sub>2</sub> -H group      |                    |                    |
|----------------|---------------------------------------------------|------------------------|---------------|------------------------|--------------------------------------------------------------|--------------------------------|--------------------|--------------------|--------------------------------|--------------------|--------------------|
|                |                                                   |                        |               |                        |                                                              | Relative methylation (Cy5/Cy3) | Cy3 signal (Input) | Cy5 signal (MeDIP) | Relative methylation (Cy5/Cy3) | Cy3 signal (Input) | Cy5 signal (MeDIP) |
| A_68_P20849637 | chr1:177622396-177622440                          | NM_021350:3934         | Chml          | PROMOTER               | 0.968                                                        | 0.263                          | 3383.15            | 889.68             | 0.255                          | 2316.07            | 589.59             |
| A_68_P31827569 | chr18:73913791-73913835                           | NM_053255:321          | Elac1         | INSIDE                 | 0.967                                                        | 1.636                          | 963.23             | 1575.81            | 1.581                          | 852.18             | 1347.54            |
| A_68_P31227868 | chr17:50432726-50432770                           | NM_010021:176          | Dazl          | INSIDE                 | 0.967                                                        | 2.133                          | 513.80             | 1095.86            | 2.063                          | 444.76             | 917.68             |
| A_68_P30573854 | chr16:17452586-17452630                           | NM_007764:529          | Crkl          | INSIDE                 | 0.967                                                        | 0.298                          | 1656.06            | 493.16             | 0.288                          | 1191.40            | 343.01             |
| A_68_P30447285 | chr15:93333764-93333813                           | NM_001033217:92534     | Prickle1      | INSIDE                 | 0.967                                                        | 1.779                          | 975.64             | 1735.35            | 1.720                          | 723.27             | 1244.19            |
| A_68_P28730613 | chr12:110132574-110132618                         | NM_177602:115          | Wdr25         | INSIDE                 | 0.967                                                        | 0.355                          | 1900.33            | 675.37             | 0.344                          | 1562.96            | 536.90             |
| A_68_P27993894 | chr11:87171685-87171729                           | NM_177167:790          | Ppm1c         | INSIDE                 | 0.967                                                        | 0.155                          | 3567.09            | 551.60             | 0.149                          | 2812.99            | 420.50             |
| A_68_P27383819 | chr10:98376903-98376947                           | NM_026482:861          | Atp2b1        | PROMOTER               | 0.967                                                        | 1.509                          | 1538.96            | 2323.03            | 1.459                          | 1188.60            | 1734.10            |
| A_68_P27262211 | chr10:75931408-75931452                           | NM_019434:285          | Mcm3ap        | PROMOTER               | 0.967                                                        | 0.227                          | 3543.61            | 805.80             | 0.220                          | 2595.21            | 570.48             |
| A_68_P26867069 | chr9:118468837-118468881                          | NM_018748:53423        | Golga4        | INSIDE                 | 0.967                                                        | 2.120                          | 1814.59            | 3847.58            | 2.051                          | 1397.45            | 2865.98            |
| A_68_P25587155 | chr7:148354454-148354502                          | NM_001172101:107       | Rnh1          | INSIDE                 | 0.967                                                        | 1.591                          | 1741.21            | 2770.68            | 1.540                          | 1477.21            | 2274.18            |
| A_68_P24956428 | chr7:6649272-6649316                              | NM_011769:151          | Zim1          | PROMOTER               | 0.967                                                        | 2.177                          | 567.25             | 1234.98            | 2.105                          | 480.18             | 1010.74            |
| A_68_P24432385 | chr6:49345373-49345417                            | NM_029916:208          | Stk31         | PROMOTER               | 0.967                                                        | 1.570                          | 1548.96            | 2431.17            | 1.517                          | 1223.87            | 1857.07            |
| A_68_P24159776 | chr5:144934512-144934556                          | NM_001081109:73230     | Lmtk2         | INSIDE                 | 0.967                                                        | 2.618                          | 652.01             | 1707.24            | 2.532                          | 591.34             | 1497.21            |
| A_68_P23573762 | chr5:30950209-30950253                            | NM_175675:81           | 4930471M23Rik | PROMOTER               | 0.967                                                        | 0.481                          | 2528.02            | 1214.88            | 0.465                          | 1872.94            | 869.99             |
| A_68_P23405235 | chr4:149655313-149655357                          | NM_001085492:690       | Rere          | PROMOTER               | 0.967                                                        | 2.454                          | 668.30             | 1639.78            | 2.373                          | 603.06             | 1431.28            |
| A_68_P23353413 | chr4:139225072-139225116                          | NM_031873:15642        | Tas1r2        | INSIDE                 | 0.967                                                        | 2.670                          | 825.16             | 2203.27            | 2.583                          | 712.76             | 1841.14            |
| A_68_P22964958 | chr4:62186074-62186118                            | NM_021498:48           | Pole3         | DIVERGENT_PROMOTER     | 0.967                                                        | 0.261                          | 1969.87            | 514.72             | 0.253                          | 1414.78            | 357.65             |
| A_68_P21874509 | chr2:174124950-174124994                          | NM_201617:1613         | Gnas          | INSIDE                 | 0.967                                                        | 1.846                          | 1444.67            | 2666.83            | 1.784                          | 1211.41            | 2161.55            |
| A_68_P32008155 | chr19:21853166-21853210                           | NM_001033759:357       | Tmem2         | INSIDE                 | 0.966                                                        | 0.371                          | 1413.40            | 524.92             | 0.359                          | 1057.55            | 379.32             |
| A_68_P30647300 | chr16:31430146-31430190                           | NM_001122683:1330      | Bdhl          | INSIDE                 | 0.966                                                        | 0.522                          | 1638.48            | 855.05             | 0.504                          | 1157.32            | 583.26             |
| A_68_P30401336 | chr15:85374246-85374290                           | NM_001163634:34232     | Wnt7b         | INSIDE                 | 0.966                                                        | 1.854                          | 788.46             | 1461.55            | 1.791                          | 624.11             | 1117.88            |
| A_68_P29517812 | chr14:33278202-33278246                           | NM_021712:188          | Slc18a3       | PROMOTER               | 0.966                                                        | 1.901                          | 660.80             | 1256.11            | 1.836                          | 510.70             | 937.72             |
| A_68_P29134802 | chr13:72765932-72765976                           | NR_030701:58           | D430050G20    | INSIDE                 | 0.966                                                        | 0.747                          | 3127.45            | 2336.94            | 0.722                          | 2489.74            | 1798.04            |
| A_68_P28603808 | A_68_P28603808                                    |                        |               | Unknown                | 0.966                                                        | 3.084                          | 980.55             | 3023.76            | 2.980                          | 824.41             | 2456.66            |
| A_68_P26274326 | chr9:3532514-3532558                              | NM_001033322:183       | Gucy1a2       | INSIDE                 | 0.966                                                        | 0.612                          | 1716.64            | 1050.96            | 0.592                          | 1281.69            | 758.38             |
| A_68_P24932176 | chr6:146991608-146991652                          | NM_145573:339          | Mrps35        | INSIDE                 | 0.966                                                        | 0.593                          | 5148.56            | 3054.59            | 0.573                          | 3732.53            | 2139.08            |
| A_68_P24459355 | chr6:53770847-53770891                            | NM_025817:49           | Tril          | PROMOTER               | 0.966                                                        | 1.705                          | 2746.98            | 4684.12            | 1.646                          | 2125.71            | 3499.69            |
| A_68_P23138267 | chr4:98062517-98062561                            | NM_001005784:22        | Inadl         | INSIDE                 | 0.966                                                        | 3.720                          | 911.71             | 3391.82            | 3.593                          | 881.69             | 3167.91            |
| A_68_P20354341 | chr1:75475955-75475999                            | NM_001001565:70        | Chpf          | INSIDE                 | 0.966                                                        | 2.246                          | 491.36             | 1103.84            | 2.170                          | 413.55             | 897.49             |
| A_68_P30513463 | chr16:5049834-5049878                             | NM_001079814:147       | Glyr1         | INSIDE                 | 0.965                                                        | 0.354                          | 1804.18            | 638.62             | 0.342                          | 1330.88            | 454.75             |
| A_68_P29672519 | chr14:65881573-65881617                           | NM_021458:294          | Fzd3          | DIVERGENT_PROMOTER     | 0.965                                                        | 0.488                          | 1208.61            | 590.35             | 0.471                          | 944.16             | 444.89             |
| A_68_P29237540 | chr13:95647136-95647180                           | NM_011021:1577         | Otp           | INSIDE                 | 0.965                                                        | 0.516                          | 1308.57            | 675.66             | 0.498                          | 1115.29            | 555.90             |
| A_68_P29009462 | chr13:46822720-46822764                           | NM_175749:476          | Nup153        | INSIDE                 | 0.965                                                        | 0.559                          | 989.43             | 553.28             | 0.539                          | 907.07             | 489.36             |
| A_68_P27950228 | chr11:79474495-79474539                           | NM_175543:69803        | Rab11fp4      | INSIDE                 | 0.965                                                        | 2.071                          | 824.62             | 1707.78            | 1.998                          | 640.50             | 1279.71            |
| A_68_P27560503 | chr11:4847990-4848034                             | NM_010904:55           | Nefh          | INSIDE                 | 0.965                                                        | 0.320                          | 3183.14            | 1017.71            | 0.309                          | 2432.52            | 750.51             |
| A_68_P26875427 | chr9:119883344-119883388                          | NM_153287:10410        | Csmp1         | INSIDE                 | 0.965                                                        | 5.625                          | 372.43             | 2094.74            | 5.429                          | 295.13             | 1602.41            |
| A_68_P26727063 | chr9:92437135-92437179                            | NM_001142916:96        | Plod2         | INSIDE                 | 0.965                                                        | 0.334                          | 1624.45            | 541.78             | 0.322                          | 1310.89            | 421.79             |
| A_68_P26605681 | chr9:68502742-68502786                            | NM_013646:1156         | Rora          | INSIDE                 | 0.965                                                        | 0.245                          | 2385.16            | 583.78             | 0.236                          | 1643.84            | 388.36             |
| A_68_P25092625 | chr7:52613255-52613299                            | NM_029741:9113         | Ppfla3        | INSIDE                 | 0.965                                                        | 4.064                          | 758.79             | 3083.75            | 3.922                          | 663.10             | 2600.47            |
| A_68_P24005520 | chr5:115141122-115141166                          | NM_019821:200          | Gltp          | PROMOTER               | 0.965                                                        | 18.421                         | 2270.74            | 41829.70           | 17.783                         | 2012.01            | 35779.14           |
| A_68_P23298059 | chr4:129374001-129374045                          | NM_199305:60           | Tmem39b       | INSIDE                 | 0.965                                                        | 2.447                          | 1542.56            | 3775.35            | 2.361                          | 1201.89            | 2837.61            |
| A_68_P22947349 | chr4:57794962-57795006                            | ENSMUST00000124581:-67 |               | PROMOTER               | 0.965                                                        | 0.482                          | 2601.44            | 1252.92            | 0.465                          | 2174.46            | 1010.75            |
| A_68_P20551221 | chr1:120218602-120218646                          | NM_026472:205          | Mki67ip       | INSIDE                 | 0.965                                                        | 0.483                          | 1098.52            | 530.21             | 0.466                          | 791.48             | 368.59             |
| A_68_P20454237 | chr1:95132383-95132427                            | NM_172463:69           | Sned1         | PROMOTER               | 0.965                                                        | 2.107                          | 887.45             | 1869.96            | 2.033                          | 709.15             | 1441.47            |
| A_68_P32139053 | chr19:45619725-45619769                           | NM_020032:15287        | Poll          | DOWNSTREAM             | 0.964                                                        | 1.752                          | 1287.49            | 2255.62            | 1.689                          | 973.76             | 1644.86            |
| A_68_P31054931 | chr17:13200874-13200921                           | NM_013671:193          | Sod2          | INSIDE                 | 0.964                                                        | 2.101                          | 557.40             | 1171.38            | 2.027                          | 426.94             | 865.32             |
| A_68_P30370104 | chr15:79913777-79913823                           | NR_028281:464          | Snord43       | PROMOTER               | 0.964                                                        | 0.513                          | 1084.79            | 556.22             | 0.494                          | 871.77             | 431.07             |
| A_68_P29575955 | chr14:47007582-47007626                           | NM_007554:2670         | Bmp4          | INSIDE                 | 0.964                                                        | 0.458                          | 6264.50            | 2869.90            | 0.442                          | 4196.06            | 1853.84            |
| A_68_P29086260 | chr13:60703649-60703693                           | NM_134062:99           | Dapk1         | INSIDE                 | 0.964                                                        | 0.497                          | 2135.57            | 1061.42            | 0.479                          | 1672.37            | 801.03             |
| A_68_P29063252 | chr13:56854327-56854371                           | AKI131829:840          |               | INSIDE                 | 0.964                                                        | 1.575                          | 1231.46            | 1939.87            | 1.519                          | 950.07             | 1457.08            |
| A_68_P28708613 | chr12:106575627-106575671                         | ENSMUST00000138649:446 |               | INSIDE                 | 0.964                                                        | 0.592                          | 2857.91            | 1693.01            | 0.571                          | 2005.78            | 1145.09            |
| A_68_P28687870 | chr12:103057567-103057611                         | NM_011812:323          | Fbln5         | PROMOTER               | 0.964                                                        | 1.479                          | 2796.63            | 4135.21            | 1.426                          | 1948.47            | 2777.77            |
| A_68_P28177556 | chr11:119251329-119251373                         | NR_035453:435          | Mir1932       | PROMOTER               | 0.964                                                        | 0.373                          | 1553.70            | 579.93             | 0.360                          | 1321.45            | 475.65             |
| A_68_P28046785 | chr11:96650631-96650675                           | NM_007622:203          | Cbx1          | INSIDE                 | 0.964                                                        | 0.419                          | 1551.88            | 650.53             | 0.404                          | 1177.22            | 475.66             |
| A_68_P27926562 | chr11:75328897-75328941                           | NM_001004157:1876      | Scarf1        | INSIDE                 | 0.964                                                        | 2.410                          | 1155.30            | 2784.69            | 2.324                          | 1024.10            | 2379.81            |
| A_68_P27682732 | chr11:31271512-31271556                           | NM_011491:1473         | Stc2          | PROMOTER               | 0.964                                                        | 0.385                          | 2876.53            | 1108.35            | 0.371                          | 2185.20            | 811.67             |
| A_68_P27100908 | chr10:43260523-43260567                           | NM_026411:256          | I700021F05Rik | INSIDE                 | 0.964                                                        | 0.450                          | 1585.49            | 713.78             | 0.434                          | 1269.69            | 551.24             |
| A_68_P26612686 | chr9:69609029-69609073                            | NM_022378:303          | Foxb1         | PROMOTER               | 0.964                                                        | 0.480                          | 2257.90            | 1084.70            | 0.463                          | 1691.96            | 783.68             |
| A_68_P26158628 | chr8:112248320-112248367                          | NM_029468:18356        | Zfp821        | INSIDE                 | 0.964                                                        | 2.943                          | 549.86             | 1618.27            | 2.838                          | 347.76             | 987.03             |
| A_68_P25609685 | chr7:152047322-152047366                          | NM_010202:54           | Fgf4          | INSIDE                 | 0.964                                                        | 0.520                          | 1091.00            | 567.52             | 0.501                          | 847.46             | 424.93             |
| A_68_P24951823 | chr7:5008286-5008330                              | NM_146178:19           | Ccdc106       | PROMOTER               | 0.964                                                        | 0.514                          | 1717.77            | 882.16             | 0.495                          | 1381.48            | 683.99             |
| A_68_P24155560 | chr5:143997116-143997160                          | NM_177681:252          | Zfp12         | INSIDE                 | 0.964                                                        | 0.621                          | 1733.98            | 1076.64            | 0.599                          | 1380.56            | 826.61             |
| A_68_P23612481 | chr5:37633390-37633434                            | NM_007765:3618         | Crmp1         | PROMOTER               | 0.964                                                        | 4.717                          | 714.85             | 3372.00            | 4.547                          | 546.66             | 2485.47            |
| A_68_P22408448 | chr3:107563100-107563144                          | NM_001113529:265       | Csfl          | INSIDE                 | 0.964                                                        | 1.745                          | 1709.18            | 2981.96            | 1.681                          | 1325.92            | 2229.05            |

| ProbeName      | Target position of probe on CpG island microarray | TargetID                 | GeneSymbol    | CpG island Description | Ratio of relative methylation (TiO <sub>2</sub> -NP/Vehicle) | Sham group                     |                    |                    | TiO <sub>2</sub> -H group      |                    |                    |
|----------------|---------------------------------------------------|--------------------------|---------------|------------------------|--------------------------------------------------------------|--------------------------------|--------------------|--------------------|--------------------------------|--------------------|--------------------|
|                |                                                   |                          |               |                        |                                                              | Relative methylation (Cy5/Cy3) | Cy3 signal (Input) | Cy5 signal (MeDIP) | Relative methylation (Cy5/Cy3) | Cy3 signal (Input) | Cy5 signal (MeDIP) |
| A_68_P22406473 | chr3:107262834-107262878                          | NM_145922:-1040          | Kcnc4         | PROMOTER               | 0.964                                                        | 4.061                          | 497.69             | 2021.25            | 3.914                          | 363.38             | 1422.32            |
| A_68_P21818226 | chr2:164323071-164323115                          | NM_133779:68             | Pigt          | INSIDE                 | 0.964                                                        | 0.315                          | 2220.66            | 698.60             | 0.303                          | 1662.08            | 504.03             |
| A_68_P20294265 | chr1:64784540-64784584                            | NM_001042659:-238        | Fzd5          | PROMOTER               | 0.964                                                        | 5.679                          | 878.39             | 4988.28            | 5.472                          | 826.30             | 4521.50            |
| A_68_P20170820 | chr1:40382866-40382910                            | NM_133193:1417           | Il1rl2        | INSIDE                 | 0.964                                                        | 0.440                          | 1710.72            | 752.96             | 0.424                          | 1338.82            | 568.06             |
| A_68_P32707834 | chrX:138824754-138824798                          | NM_001033600:302         | Acs14         | INSIDE                 | 0.963                                                        | 0.372                          | 1522.44            | 566.56             | 0.358                          | 2209.18            | 791.96             |
| A_68_P31766836 | chr18:63137638-63137682                           | NM_028017:91             | Napg          | INSIDE                 | 0.963                                                        | 0.401                          | 2091.71            | 838.58             | 0.386                          | 1505.54            | 581.08             |
| A_68_P31611596 | chr18:34380712-34380756                           | NM_007462:97             | Apc           | INSIDE                 | 0.963                                                        | 0.449                          | 1952.57            | 876.73             | 0.432                          | 1491.94            | 645.24             |
| A_68_P31600220 | chr18:32070086-32070130                           | NM_026006:1449           | Sft2d3        | INSIDE                 | 0.963                                                        | 0.451                          | 1512.92            | 683.02             | 0.435                          | 1049.49            | 456.44             |
| A_68_P30118688 | chr15:32175071-32175115                           | NM_009154:525            | Sema5a        | INSIDE                 | 0.963                                                        | 0.362                          | 1326.00            | 480.08             | 0.349                          | 975.10             | 339.95             |
| A_68_P29616217 | chr14:55710378-55710422                           | NM_001039198:485         | Zfx2          | INSIDE                 | 0.963                                                        | 0.317                          | 3783.76            | 1200.76            | 0.305                          | 2749.45            | 839.89             |
| A_68_P29083952 | chr13:60278886-60278930                           | NM_008086:-12            | Gas1          | PROMOTER               | 0.963                                                        | 0.667                          | 2217.52            | 1479.25            | 0.643                          | 1832.31            | 1177.32            |
| A_68_P28429503 | chr12:52478533-52478577                           | NM_029825:-12            | Scfd1         | PROMOTER               | 0.963                                                        | 0.437                          | 2613.15            | 1141.23            | 0.421                          | 1996.77            | 839.68             |
| A_68_P27282592 | chr10:79804334-79804378                           | NM_001113548:6835        | Adamts15      | INSIDE                 | 0.963                                                        | 0.533                          | 2382.01            | 1270.07            | 0.513                          | 1639.08            | 841.41             |
| A_68_P26844287 | chr9:114277292-114277336                          | NM_019922:22516          | Crtap         | DOWNSTREAM             | 0.963                                                        | 1.471                          | 2107.27            | 3100.48            | 1.417                          | 1691.81            | 2398.04            |
| A_68_P26238000 | chr8:125641592-125641636                          | NM_170684:341            | Cpne7         | INSIDE                 | 0.963                                                        | 0.613                          | 1413.93            | 866.07             | 0.590                          | 1071.39            | 632.04             |
| A_68_P25089827 | chr7:52125023-52125067                            | NM_133949:114            | Ptov1         | INSIDE                 | 0.963                                                        | 2.383                          | 1549.47            | 3692.20            | 2.295                          | 1259.35            | 2890.08            |
| A_68_P24444431 | chr6:51419774-51419818                            | NM_016806:97             | Hmnpa2b1      | INSIDE                 | 0.963                                                        | 0.469                          | 1280.07            | 600.34             | 0.452                          | 1023.83            | 462.55             |
| A_68_P23996939 | chr5:113650467-113650511                          | NM_001033428:-5440       | Tmem211       | PROMOTER               | 0.963                                                        | 0.599                          | 1159.06            | 694.77             | 0.577                          | 978.08             | 564.74             |
| A_68_P23195053 | chr4:107890586-107890630                          | NM_001167936:-81         | Zygl1a        | PROMOTER               | 0.963                                                        | 0.345                          | 3960.26            | 1365.25            | 0.332                          | 3183.40            | 1056.44            |
| A_68_P20863708 | chr1:180336414-180336458                          | NM_026626:425            | Efcab2        | INSIDE                 | 0.963                                                        | 0.608                          | 1148.40            | 698.78             | 0.586                          | 1031.56            | 604.30             |
| A_68_P20353686 | chr1:75384915-75384959                            | NM_001085370:2752        | Speg          | INSIDE                 | 0.963                                                        | 1.487                          | 1581.31            | 2351.76            | 1.432                          | 1374.82            | 1968.58            |
| A_68_P20151297 | chr1:36995682-36995729                            | NM_018872:667            | Tmem131       | INSIDE                 | 0.963                                                        | 0.315                          | 2220.61            | 699.96             | 0.304                          | 1675.05            | 508.55             |
| A_68_P32385148 | chrX:50341666-50341710                            | NM_013556:434            | Hprt          | INSIDE                 | 0.962                                                        | 1.617                          | 3225.18            | 5213.70            | 1.555                          | 4237.41            | 6589.26            |
| A_68_P32044141 | chr19:28086028-28086072                           | NM_011265:-394           | Rfx3          | PROMOTER               | 0.962                                                        | 0.144                          | 6331.25            | 914.86             | 0.139                          | 4398.93            | 611.46             |
| A_68_P31135105 | chr17:30749555-30749599                           | NM_001113560:28          | Glo1          | INSIDE                 | 0.962                                                        | 0.645                          | 1835.56            | 1184.72            | 0.621                          | 1500.28            | 931.71             |
| A_68_P28555630 | chr12:77811318-77811362                           | NM_013675:194            | Spnb1         | INSIDE                 | 0.962                                                        | 0.439                          | 1947.91            | 856.03             | 0.423                          | 1391.01            | 588.23             |
| A_68_P26998900 | chr10:22365258-22365302                           | NM_178934:464            | Slc2a12       | INSIDE                 | 0.962                                                        | 0.201                          | 3737.93            | 749.63             | 0.193                          | 2718.25            | 524.21             |
| A_68_P25616729 | chr8:4238967-4239011                              | NM_001042557:249         | Map2k7        | INSIDE                 | 0.962                                                        | 0.279                          | 2924.19            | 815.09             | 0.268                          | 2008.27            | 538.50             |
| A_68_P25375960 | chr7:109044724-109044768                          | NM_027532:-182           | 3200002M19Rik | PROMOTER               | 0.962                                                        | 0.443                          | 1255.34            | 556.53             | 0.427                          | 984.40             | 420.02             |
| A_68_P25098817 | chr7:53652411-53652455                            | NM_001112739:566         | Kcnc1         | INSIDE                 | 0.962                                                        | 0.388                          | 2622.10            | 1018.58            | 0.374                          | 1925.86            | 719.42             |
| A_68_P23437420 | chr4:154624071-154624115                          | NM_001190445:18          | 2610002J02Rik | INSIDE                 | 0.962                                                        | 0.530                          | 1032.06            | 546.57             | 0.510                          | 907.35             | 462.33             |
| A_68_P23327089 | chr4:134731774-134731818                          | NM_019732:55237          | Rumx3         | INSIDE                 | 0.962                                                        | 2.693                          | 295.21             | 794.92             | 2.590                          | 235.10             | 609.02             |
| A_68_P23317939 | chr4:133054412-133054456                          | NM_001081156:31          | Tnnp1         | INSIDE                 | 0.962                                                        | 0.368                          | 2344.93            | 862.46             | 0.354                          | 1596.41            | 564.69             |
| A_68_P22385237 | chr3:103084452-103084496                          | NM_001079830:1259        | Trim33        | INSIDE                 | 0.962                                                        | 0.353                          | 2170.57            | 765.72             | 0.339                          | 1485.46            | 504.18             |
| A_68_P21905662 | chr2:180436767-180436811                          | NM_175551:17             | Dido1         | INSIDE                 | 0.962                                                        | 0.385                          | 2539.84            | 977.97             | 0.371                          | 1965.03            | 728.10             |
| A_68_P20637767 | chr1:137043374-137043418                          | NM_026823:-14            | Arl8a         | PROMOTER               | 0.962                                                        | 2.031                          | 999.43             | 2030.32            | 1.954                          | 836.48             | 1634.22            |
| A_68_P31561530 | chr18:24868456-24868500                           | NM_175276:533            | Fhod3         | INSIDE                 | 0.961                                                        | 0.519                          | 3023.18            | 1568.17            | 0.498                          | 2182.90            | 1087.74            |
| A_68_P31020946 | chr17:6079495-6079539                             | NM_001111017:223         | Serac1        | INSIDE                 | 0.961                                                        | 0.472                          | 2780.97            | 1313.46            | 0.454                          | 2071.39            | 940.11             |
| A_68_P30966050 | chr16:919131897-919131941                         | NM_138597:43             | Atp5o         | PROMOTER               | 0.961                                                        | 0.480                          | 1195.32            | 573.51             | 0.461                          | 962.40             | 443.93             |
| A_68_P30605855 | chr16:23983543-23983587                           | NM_009744:5134           | Bcl6          | INSIDE                 | 0.961                                                        | 0.593                          | 2299.50            | 1362.84            | 0.569                          | 1734.62            | 987.73             |
| A_68_P28047120 | chr1:196711640-96711684                           | NR_029562:-44            | Mir152        | PROMOTER               | 0.961                                                        | 0.419                          | 3563.32            | 1492.74            | 0.403                          | 2621.52            | 1055.88            |
| A_68_P27921011 | chr11:74336607-74336651                           | NM_001015046:67032       | Rap1gap2      | INSIDE                 | 0.961                                                        | 0.348                          | 3528.20            | 1227.33            | 0.334                          | 2476.17            | 827.82             |
| A_68_P27080350 | chr10:39452886-39452930                           | NM_011264:943            | Rev3l         | INSIDE                 | 0.961                                                        | 9.714                          | 2541.57            | 24689.58           | 9.339                          | 1892.09            | 17670.98           |
| A_68_P26628303 | chr9:72379539-72379583                            | NM_001033536:-486        | Rfx7          | PROMOTER               | 0.961                                                        | 0.178                          | 4975.82            | 886.34             | 0.171                          | 3289.74            | 563.19             |
| A_68_P26542619 | chr9:57437422-57437466                            | NM_027895:186            | Ulk3          | INSIDE                 | 0.961                                                        | 2.896                          | 617.34             | 1787.81            | 2.784                          | 510.58             | 1421.28            |
| A_68_P26345852 | chr9:20988662-20988706                            | NM_183408:18527          | Pde4a         | INSIDE                 | 0.961                                                        | 0.557                          | 1841.66            | 1025.84            | 0.536                          | 1427.65            | 764.56             |
| A_68_P24463221 | chr6:54379963-54380009                            | NR_033635:229            | 9130019P16Rik | INSIDE                 | 0.961                                                        | 0.328                          | 1727.58            | 567.28             | 0.316                          | 1254.28            | 395.99             |
| A_68_P24163714 | chr5:145725951-145725995                          | NM_001038627:727         | Smurf1        | INSIDE                 | 0.961                                                        | 0.469                          | 3455.59            | 1621.53            | 0.451                          | 2497.10            | 1125.49            |
| A_68_P23226959 | chr4:115635591-115635635                          | ENSMUST00000125761:54668 |               | DOWNSTREAM             | 0.961                                                        | 2.318                          | 343.93             | 797.14             | 2.227                          | 334.08             | 744.04             |
| A_68_P22180928 | chr3:60806900-60806944                            | NM_008772:206            | P2ry1         | INSIDE                 | 0.961                                                        | 0.343                          | 1929.08            | 661.78             | 0.330                          | 1474.76            | 486.33             |
| A_68_P21986761 | chr3:21975073-21975117                            | NM_030732:-479           | Tb11xrl       | PROMOTER               | 0.961                                                        | 0.359                          | 2536.89            | 909.61             | 0.345                          | 2175.96            | 750.02             |
| A_68_P20680083 | chr1:145624045-145624089                          | NM_013835:115            | Trove2        | INSIDE                 | 0.961                                                        | 1.846                          | 827.92             | 1528.03            | 1.774                          | 683.48             | 1212.72            |
| A_68_P20597392 | chr1:129765401-129765445                          | NM_178690:73             | Rab3gap1      | INSIDE                 | 0.961                                                        | 0.250                          | 1908.44            | 476.27             | 0.240                          | 1555.19            | 373.00             |
| A_68_P32145750 | chr19:46835351-46835395                           | NM_001102471:-726        | Cnnm2         | PROMOTER               | 0.960                                                        | 2.914                          | 1265.41            | 3687.26            | 2.797                          | 993.45             | 2778.44            |
| A_68_P31943259 | chr19:8810305-8810349                             | NM_134139:-2             | Wdr74         | PROMOTER               | 0.960                                                        | 0.549                          | 1832.50            | 1006.03            | 0.527                          | 1498.60            | 790.13             |
| A_68_P29554792 | chr14:40285336-40285380                           | NM_001190187:1018        | Nrg3          | INSIDE                 | 0.960                                                        | 0.236                          | 5405.94            | 1277.25            | 0.227                          | 3452.81            | 783.44             |
| A_68_P29336879 | chr13:113591191-113591235                         | NM_008903:82             | Ppap2a        | INSIDE                 | 0.960                                                        | 0.242                          | 2008.69            | 485.63             | 0.232                          | 1567.84            | 363.88             |
| A_68_P29234320 | chr13:95128962-95129006                           | NM_009680:70             | Ap3b1         | INSIDE                 | 0.960                                                        | 0.654                          | 1955.81            | 1279.18            | 0.628                          | 1576.53            | 989.78             |
| A_68_P26475231 | chr9:45480834-45480878                            | NM_001081270:242481      | Dscaml1       | INSIDE                 | 0.960                                                        | 2.109                          | 1393.24            | 2938.76            | 2.024                          | 1031.54            | 2088.16            |
| A_68_P26471637 | chr9:4494614-44946858                             | NM_001013390:-288        | Scn4b         | DIVERGENT_PROMOTER     | 0.960                                                        | 0.458                          | 1363.68            | 624.78             | 0.440                          | 1171.38            | 515.06             |
| A_68_P26224547 | chr8:123632165-123632209                          | NM_001166482:93          | Mthfsd        | INSIDE                 | 0.960                                                        | 0.259                          | 1697.55            | 439.40             | 0.249                          | 1275.44            | 317.07             |
| A_68_P25725385 | chr8:26212906-26212950                            | NM_031257:-645           | Plekha2       | PROMOTER               | 0.960                                                        | 0.399                          | 2554.75            | 1020.56            | 0.383                          | 1868.61            | 716.60             |
| A_68_P24120141 | chr5:136720302-136720346                          | NM_018825:449            | Slx2b2        | INSIDE                 | 0.960                                                        | 1.664                          | 1363.76            | 2269.30            | 1.597                          | 1000.27            | 1597.20            |
| A_68_P23854795 | chr5:84846156-84846200                            | NM_007937:229            | Epha5         | INSIDE                 | 0.960                                                        | 2.039                          | 920.46             | 1876.93            | 1.958                          | 743.96             | 1456.85            |
| A_68_P22312508 | chr3:88019276-88019320                            | NR_029817:-221           | Mir9-1        | PROMOTER               | 0.960                                                        | 0.382                          | 3466.01            | 1325.50            | 0.367                          | 2417.90            | 887.62             |

| ProbeName      | Target position of probe on CpG island microarray | TargetID                 | GeneSymbol    | CpG island Description | Ratio of relative methylation (TiO <sub>2</sub> -NP/Vehicle) | Sham group                     |                    |                    | TiO <sub>2</sub> -H group      |                    |                    |
|----------------|---------------------------------------------------|--------------------------|---------------|------------------------|--------------------------------------------------------------|--------------------------------|--------------------|--------------------|--------------------------------|--------------------|--------------------|
|                |                                                   |                          |               |                        |                                                              | Relative methylation (Cy5/Cy3) | Cy3 signal (Input) | Cy5 signal (MeDIP) | Relative methylation (Cy5/Cy3) | Cy3 signal (Input) | Cy5 signal (MeDIP) |
| A_68_P21909031 | chr2:180921876-180921920                          | NM_025598:-149           | Pdpf          | PROMOTER               | 0.960                                                        | 2.258                          | 1353.25            | 3055.07            | 2.167                          | 1076.99            | 2333.48            |
| A_68_P21573663 | chr2:119979882-119979926                          | NM_133838:407            | Ehd4          | INSIDE                 | 0.960                                                        | 0.540                          | 2321.63            | 1254.04            | 0.519                          | 1938.34            | 1005.30            |
| A_68_P21110675 | chr2:31544313-31544357                            | NM_00112703:259          | Ab1l          | INSIDE                 | 0.960                                                        | 0.604                          | 1666.79            | 1006.22            | 0.580                          | 1506.79            | 873.61             |
| A_68_P20616233 | chr1:133422446-133422490                          | NM_001081011:1470        | Srgap2        | INSIDE                 | 0.960                                                        | 1.575                          | 1286.04            | 2024.93            | 1.511                          | 1104.87            | 1669.63            |
| A_68_P20066647 | chr1:19204272-19204316                            | NM_001025305:2160        | Tcfap2b       | INSIDE                 | 0.960                                                        | 0.266                          | 3343.34            | 889.05             | 0.255                          | 2654.13            | 677.40             |
| A_68_P32185221 | chr19:53977782-53977826                           | NM_001168491:-36         | Pcdcd4        | PROMOTER               | 0.959                                                        | 0.571                          | 1305.48            | 746.08             | 0.548                          | 1033.48            | 566.43             |
| A_68_P31632608 | chr18:38359167-38359214                           | NM_029357:10226          | Pcdhl         | INSIDE                 | 0.959                                                        | 2.581                          | 279.17             | 720.45             | 2.476                          | 261.51             | 647.40             |
| A_68_P31097498 | chr17:24607655-24607699                           | NM_025954:259            | Pgp           | INSIDE                 | 0.959                                                        | 0.483                          | 2862.95            | 1382.89            | 0.463                          | 2068.23            | 957.77             |
| A_68_P30641001 | chr16:30283247-30283291                           | NM_028973:72             | Lrrc15        | INSIDE                 | 0.959                                                        | 0.463                          | 1028.96            | 476.86             | 0.444                          | 825.14             | 366.60             |
| A_68_P30397289 | chr15:84684008-84684052                           | NM_001081166:2529        | Phf21b        | INSIDE                 | 0.959                                                        | 0.559                          | 2535.17            | 1417.25            | 0.536                          | 1906.04            | 1022.21            |
| A_68_P30132825 | chr15:35256447-35256491                           | BC048602:1822            |               | INSIDE                 | 0.959                                                        | 2.223                          | 586.67             | 1303.89            | 2.132                          | 545.39             | 1162.93            |
| A_68_P27849837 | chr11:61498300-61498344                           | NM_178618:411            | Fam83g        | INSIDE                 | 0.959                                                        | 1.714                          | 2426.80            | 4160.20            | 1.644                          | 1813.41            | 2981.16            |
| A_68_P27288886 | chr10:80787882-80787926                           | NM_027381:4057           | 2510012J08Rik | INSIDE                 | 0.959                                                        | 1.908                          | 1168.58            | 2229.32            | 1.830                          | 882.67             | 1615.37            |
| A_68_P27093483 | chr10:41917159-41917203                           | NM_019740:79368          | Foxo3         | INSIDE                 | 0.959                                                        | 1.789                          | 1672.82            | 2992.41            | 1.716                          | 1274.90            | 2187.41            |
| A_68_P25837684 | chr8:47825681-47825725                            | NM_008391:604            | Irf2          | INSIDE                 | 0.959                                                        | 0.370                          | 1576.97            | 583.22             | 0.355                          | 1304.25            | 462.64             |
| A_68_P25666781 | chr8:13200390-13200434                            | NM_025768:212            | Grtp1         | INSIDE                 | 0.959                                                        | 1.799                          | 1287.43            | 2315.59            | 1.724                          | 1088.79            | 1877.31            |
| A_68_P25565906 | chr7:144629538-144629582                          | NR_033611:204            | Gml2669       | INSIDE                 | 0.959                                                        | 0.473                          | 1927.92            | 912.31             | 0.454                          | 1668.07            | 756.84             |
| A_68_P24819295 | chr6:125141439-125141483                          | NR_028517:-5011          | Scarna10      | PROMOTER               | 0.959                                                        | 0.253                          | 2191.17            | 554.61             | 0.243                          | 1593.61            | 387.01             |
| A_68_P24687696 | chr6:99642117-99642161                            | NM_008158:-534           | Gpr27         | PROMOTER               | 0.959                                                        | 0.638                          | 1668.32            | 1064.05            | 0.612                          | 1340.40            | 820.09             |
| A_68_P24161578 | chr5:145306716-145306760                          | NM_016789:-17            | Nptx2         | PROMOTER               | 0.959                                                        | 2.701                          | 718.37             | 1940.37            | 2.590                          | 609.03             | 1577.34            |
| A_68_P23410313 | chr4:150503244-150503288                          | NM_001081557:732611      | Camta1        | INSIDE                 | 0.959                                                        | 0.644                          | 2250.49            | 1450.18            | 0.618                          | 1564.71            | 966.61             |
| A_68_P23074274 | chr4:85160094-85160138                            | ENSMUST00000147066:-114  |               | PROMOTER               | 0.959                                                        | 0.581                          | 2524.21            | 1467.54            | 0.557                          | 1916.10            | 1068.17            |
| A_68_P22531470 | chr3:131005610-131005654                          | NM_027816:513            | Cyp2u1        | INSIDE                 | 0.959                                                        | 2.219                          | 432.12             | 959.05             | 2.128                          | 419.93             | 893.80             |
| A_68_P21820020 | chr2:164658912-164658956                          | NM_001082974:162         | Neur12        | INSIDE                 | 0.959                                                        | 0.389                          | 2320.39            | 903.27             | 0.373                          | 1751.23            | 653.78             |
| A_68_P21104695 | chr2:30549015-30549059                            | ENSMUST00000146702:63862 |               | DOWNSTREAM             | 0.959                                                        | 2.931                          | 743.27             | 2178.73            | 2.810                          | 616.34             | 1732.13            |
| A_68_P30956557 | chr16:90387057-90387101                           | NM_015755:437            | Hunk          | INSIDE                 | 0.958                                                        | 0.484                          | 2008.82            | 972.27             | 0.464                          | 1481.86            | 686.88             |
| A_68_P30726540 | chr16:45408945-45408989                           | NM_010818:200            | Cd200         | INSIDE                 | 0.958                                                        | 0.629                          | 2187.17            | 1374.80            | 0.602                          | 1599.98            | 963.94             |
| A_68_P29020720 | chr13:48764426-48764470                           | NM_007526:6044           | Barx1         | DOWNSTREAM             | 0.958                                                        | 0.252                          | 4091.93            | 1031.50            | 0.241                          | 2977.47            | 718.78             |
| A_68_P28450023 | chr12:56086848-56086892                           | NM_013815:453            | Baz1a         | INSIDE                 | 0.958                                                        | 3.119                          | 644.61             | 2010.54            | 2.989                          | 474.96             | 1419.46            |
| A_68_P28223705 | chr12:8681057-8681101                             | NM_030723:-408           | Pum2          | PROMOTER               | 0.958                                                        | 0.385                          | 1339.27            | 515.62             | 0.369                          | 1046.88            | 386.05             |
| A_68_P28220740 | chr12:8215059-8215103                             | NM_001167767:148         | 1110057K04Rik | INSIDE                 | 0.958                                                        | 0.584                          | 3701.00            | 2162.18            | 0.559                          | 2781.00            | 1555.77            |
| A_68_P28055768 | chr11:98200119-98200163                           | NM_010895:-9181          | Neurod2       | DIVERGENT_PROMOTER     | 0.958                                                        | 0.509                          | 1855.03            | 944.02             | 0.487                          | 1416.36            | 690.43             |
| A_68_P27081279 | chr10:39618779-39618823                           | NR_033628:244            | AA474331      | INSIDE                 | 0.958                                                        | 0.621                          | 1853.94            | 1150.95            | 0.595                          | 1415.84            | 842.11             |
| A_68_P26629967 | chr9:72704625-72704669                            | NM_175485:49566          | Prtg          | INSIDE                 | 0.958                                                        | 2.346                          | 1456.91            | 3417.30            | 2.246                          | 1175.50            | 2640.40            |
| A_68_P25972608 | chr8:77736812-77736856                            | NM_029182:-1008          | Rasd2         | PROMOTER               | 0.958                                                        | 0.519                          | 4043.93            | 2097.19            | 0.497                          | 2903.04            | 1442.92            |
| A_68_P25507823 | chr7:135019837-135019881                          | NM_146259:479            | Zipf68        | INSIDE                 | 0.958                                                        | 0.579                          | 1330.05            | 769.86             | 0.555                          | 1131.56            | 627.67             |
| A_68_P24837689 | chr6:128150353-128150397                          | NM_010895:-9181          |               | INSIDE                 | 0.958                                                        | 0.399                          | 1562.95            | 623.93             | 0.382                          | 1354.57            | 517.91             |
| A_68_P24449035 | chr6:52153690-52153734                            | NM_010453:874            | Hoxa5         | INSIDE                 | 0.958                                                        | 2.187                          | 920.82             | 2013.56            | 2.094                          | 747.34             | 1564.78            |
| A_68_P24191337 | chr5:151325172-151325216                          | NM_009765:-3             | Bra2          | DIVERGENT_PROMOTER     | 0.958                                                        | 1.860                          | 1038.17            | 1931.45            | 1.781                          | 893.63             | 1591.95            |
| A_68_P22314314 | chr3:88336898-88336942                            | NM_001029890:604         | Mex3a         | INSIDE                 | 0.958                                                        | 0.228                          | 2244.83            | 512.25             | 0.219                          | 1523.76            | 333.01             |
| A_68_P21750610 | chr2:152512595-152512639                          | NM_025543:-267           | Mets2         | PROMOTER               | 0.958                                                        | 1.784                          | 1245.04            | 2220.74            | 1.709                          | 1009.48            | 1725.22            |
| A_68_P21095672 | chr2:29050439-29050483                            | NM_133500:53100          | Ntng2         | INSIDE                 | 0.958                                                        | 0.549                          | 2519.25            | 1384.03            | 0.526                          | 2054.42            | 1080.80            |
| A_68_P32537944 | chrX:91480391-91480435                            | NM_001039059:144         | Klhl15        | INSIDE                 | 0.957                                                        | 1.759                          | 1008.81            | 1774.68            | 1.683                          | 1156.35            | 1946.03            |
| A_68_P31423369 | chr17:87845478-87845522                           | NM_007589:775            | Calm2         | INSIDE                 | 0.957                                                        | 1.992                          | 528.77             | 1053.16            | 1.906                          | 450.99             | 859.70             |
| A_68_P30660865 | chr16:33967049-33967093                           | NM_009471:19             | Umps          | INSIDE                 | 0.957                                                        | 0.144                          | 3081.11            | 442.66             | 0.137                          | 2237.25            | 307.58             |
| A_68_P30470421 | chr15:97535782-97535826                           | NM_028003:449            | Rpap3         | INSIDE                 | 0.957                                                        | 0.474                          | 2985.65            | 1414.11            | 0.453                          | 2220.24            | 1006.12            |
| A_68_P28987058 | chr13:43012395-43012444                           | NM_001005740:207470      | Phactr1       | INSIDE                 | 0.957                                                        | 0.405                          | 1144.61            | 463.73             | 0.388                          | 908.91             | 352.49             |
| A_68_P25776076 | chr8:35869953-35869997                            | NM_176933:-689           | Dusp4         | PROMOTER               | 0.957                                                        | 0.384                          | 2780.76            | 1067.06            | 0.367                          | 2151.93            | 790.02             |
| A_68_P23523567 | chr5:20457129-20457173                            | NR_030699:344            | A630072M18Rik | INSIDE                 | 0.957                                                        | 1.951                          | 1022.27            | 1994.51            | 1.868                          | 892.54             | 1667.33            |
| A_68_P22367896 | chr3:99966241-99966285                            | NM_175552:64             | Wdr3          | INSIDE                 | 0.957                                                        | 0.562                          | 1821.97            | 1023.32            | 0.537                          | 1413.39            | 759.47             |
| A_68_P21978657 | chr3:20054597-20054641                            | NM_013755:377            | Gyg           | INSIDE                 | 0.957                                                        | 1.943                          | 826.87             | 1606.72            | 1.839                          | 714.55             | 1328.61            |
| A_68_P21957226 | chr3:14534076-14534120                            | NM_001163579:311         | Lrrcc1        | INSIDE                 | 0.957                                                        | 3.152                          | 1855.24            | 5847.67            | 3.017                          | 1555.92            | 4693.90            |
| A_68_P21952654 | chr3:13472953-13472997                            | NM_001163328:1320        | Raly1         | INSIDE                 | 0.957                                                        | 0.379                          | 1836.40            | 696.45             | 0.363                          | 1432.27            | 519.97             |
| A_68_P32908649 | chr12:89598957-89599001                           | NM_028105:-266           | Adck1         | PROMOTER               | 0.956                                                        | 2.219                          | 363.49             | 806.71             | 2.121                          | 370.68             | 786.25             |
| A_68_P32427549 | chrX:61529891-61529935                            | NM_178740:259            | Slitrk4       | INSIDE                 | 0.956                                                        | 0.572                          | 1378.92            | 789.14             | 0.547                          | 2032.57            | 1112.24            |
| A_68_P31425157 | chr17:88197480-88197524                           | NM_199251:-168           | Kcnk12        | PROMOTER               | 0.956                                                        | 0.155                          | 4979.91            | 770.25             | 0.148                          | 3811.14            | 563.40             |
| A_68_P31143941 | chr17:32280371-32280415                           | NM_008716:23405          | Notch3        | INSIDE                 | 0.956                                                        | 0.500                          | 1567.43            | 783.79             | 0.478                          | 1194.38            | 570.83             |
| A_68_P30402005 | chr15:85476809-85476853                           | AK037366:-9265           |               | PROMOTER               | 0.956                                                        | 0.560                          | 1740.06            | 974.92             | 0.536                          | 1496.65            | 801.68             |
| A_68_P30397310 | chr15:84686778-84686823                           | NM_001081166:-241        | Phf21b        | PROMOTER               | 0.956                                                        | 0.378                          | 3977.96            | 1503.33            | 0.361                          | 2893.79            | 1045.55            |
| A_68_P29052393 | chr13:55057473-55057517                           | NM_153131:6702           | Unc5a         | INSIDE                 | 0.956                                                        | 1.769                          | 2942.19            | 5204.26            | 1.690                          | 2346.06            | 3965.72            |
| A_68_P29048047 | chr13:54287555-54287599                           | NM_008286:79             | Hrh2          | INSIDE                 | 0.956                                                        | 0.344                          | 1504.07            | 517.89             | 0.329                          | 1266.60            | 417.05             |
| A_68_P28743061 | chr12:112512577-112512621                         | NM_033603:3277           | Amn           | INSIDE                 | 0.956                                                        | 0.442                          | 4130.02            | 1826.26            | 0.423                          | 2885.90            | 1220.59            |
| A_68_P27282833 | chr10:79844657-79844701                           | NM_198615:5718           | Mex3d         | INSIDE                 | 0.956                                                        | 2.601                          | 438.37             | 1140.41            | 2.486                          | 397.10             | 987.15             |
| A_68_P26511312 | A_68_P26511312                                    |                          |               | Unknown                | 0.956                                                        | 4.477                          | 564.61             | 2528.03            | 4.279                          | 472.23             | 2020.89            |
| A_68_P26238678 | chr8:125759558-125759602                          | NM_030176:529            | Spta2L        | INSIDE                 | 0.956                                                        | 0.517                          | 1469.96            | 760.65             | 0.495                          | 1123.44            | 555.65             |

| ProbeName      | Target position of probe on CpG island microarray | TargetID                 | GeneSymbol    | CpG island Description | Ratio of relative methylation (TiO2-NP/Vehicle) | Sham group                     |                    |                    | TiO2-H group                   |                    |                    |
|----------------|---------------------------------------------------|--------------------------|---------------|------------------------|-------------------------------------------------|--------------------------------|--------------------|--------------------|--------------------------------|--------------------|--------------------|
|                |                                                   |                          |               |                        |                                                 | Relative methylation (Cy5/Cy3) | Cy3 signal (Input) | Cy5 signal (MeDIP) | Relative methylation (Cy5/Cy3) | Cy3 signal (Input) | Cy5 signal (MeDIP) |
| A_68_P26024230 | chr8:87823989-87824033                            | NM_001163791:480         | Orc6          | INSIDE                 | 0.956                                           | 0.399                          | 1239.38            | 494.53             | 0.382                          | 1043.29            | 398.14             |
| A_68_P24326228 | chr6:29352876-29352920                            | NM_001201378:3973        | Ccdc136       | INSIDE                 | 0.956                                           | 2.011                          | 722.48             | 1453.16            | 1.923                          | 585.88             | 1126.83            |
| A_68_P23756860 | chr5:65929084-65929128                            | NM_016786:607            | Ube2k         | INSIDE                 | 0.956                                           | 0.564                          | 2386.22            | 1344.90            | 0.539                          | 1850.61            | 996.96             |
| A_68_P22388053 | chr3:103594655-103594699                          | NM_010432:522            | Hipk1         | INSIDE                 | 0.956                                           | 0.385                          | 2441.49            | 938.99             | 0.368                          | 1703.43            | 626.57             |
| A_68_P22317996 | chr3:89031659-89031703                            | NR_030579:-560           | Mir92b        | DIVERGENT_PROMOTER     | 0.956                                           | 0.372                          | 1695.35            | 630.11             | 0.355                          | 1233.18            | 438.18             |
| A_68_P21331222 | chr2:73224458-73224502                            | NM_001190297:-25         | Gpr155        | PROMOTER               | 0.956                                           | 0.312                          | 4407.91            | 1374.09            | 0.298                          | 3352.93            | 998.84             |
| A_68_P21177697 | chr2:44412424-44412468                            | NM_172662:304696         | Gtdc1         | DOWNSTREAM             | 0.956                                           | 1.760                          | 1764.13            | 3104.70            | 1.683                          | 1548.95            | 2606.52            |
| A_68_P32745698 | chrX:147955401-147955445                          | NM_177201:208            | Phf8          | INSIDE                 | 0.955                                           | 3.085                          | 436.78             | 1347.42            | 2.946                          | 605.68             | 1784.27            |
| A_68_P32571131 | chrX:100129101-100129145                          | NR_026596:440            | Gm5126        | INSIDE                 | 0.955                                           | 1.759                          | 775.10             | 1363.68            | 1.680                          | 1080.75            | 1815.26            |
| A_68_P32218817 | chr19:59419763-59419807                           | NM_001033222:486         | Pdzd8         | INSIDE                 | 0.955                                           | 0.598                          | 2014.85            | 1204.94            | 0.571                          | 1493.00            | 852.33             |
| A_68_P31744363 | chr18:58997551-58997595                           | NM_175506:1155           | Adamts19      | INSIDE                 | 0.955                                           | 0.476                          | 1632.03            | 776.87             | 0.455                          | 1212.94            | 551.63             |
| A_68_P31490820 | chr18:10610131-10610175                           | NM_001081222:198         | Esco1         | INSIDE                 | 0.955                                           | 1.948                          | 571.56             | 1113.13            | 1.860                          | 508.63             | 946.16             |
| A_68_P30401337 | chr15:85374375-85374419                           | NM_001163634:34104       | Wnt7b         | INSIDE                 | 0.955                                           | 2.397                          | 676.86             | 1622.57            | 2.290                          | 488.91             | 1119.61            |
| A_68_P29937477 | chr14:118634921-118634965                         | NM_177753:1310           | Sox21         | INSIDE                 | 0.955                                           | 2.178                          | 641.77             | 1397.66            | 2.080                          | 629.12             | 1308.30            |
| A_68_P29024948 | chr13:49478604-49478648                           | NM_001039179:41709       | Bicd2         | INSIDE                 | 0.955                                           | 4.727                          | 1499.40            | 7087.92            | 4.514                          | 1338.09            | 6040.63            |
| A_68_P28941007 | chr13:34967553-34967597                           | NM_013830:212            | Ppp4b         | INSIDE                 | 0.955                                           | 0.624                          | 1477.95            | 922.25             | 0.596                          | 1291.12            | 769.19             |
| A_68_P28574824 | chr12:81361474-81361518                           | NM_134156:-138           | Actn1         | PROMOTER               | 0.955                                           | 0.152                          | 3194.78            | 486.76             | 0.146                          | 2091.60            | 304.38             |
| A_68_P28553607 | chr12:77472331-77472375                           | NM_178744:1100           | Zbtb1         | INSIDE                 | 0.955                                           | 1.515                          | 1846.91            | 2797.26            | 1.446                          | 1351.64            | 1954.78            |
| A_68_P28534712 | chr12:74046980-74047024                           | NM_011384:6071           | Six6          | DOWNSTREAM             | 0.955                                           | 2.119                          | 831.80             | 1762.33            | 2.023                          | 669.93             | 1355.25            |
| A_68_P27278893 | chr10:79243017-79243061                           | NM_031380:3020           | Fstl3         | INSIDE                 | 0.955                                           | 0.176                          | 3387.29            | 595.76             | 0.168                          | 2351.26            | 394.79             |
| A_68_P27254390 | chr10:74524101-74524145                           | NM_001081412:482         | Bcr           | INSIDE                 | 0.955                                           | 2.145                          | 657.84             | 1411.02            | 2.049                          | 501.55             | 1027.71            |
| A_68_P26476240 | chr9:45636562-45636606                            | NM_001081373:137         | Cep164        | INSIDE                 | 0.955                                           | 0.342                          | 1572.20            | 537.55             | 0.327                          | 1260.70            | 411.64             |
| A_68_P26350701 | chr9:21969396-21969440                            | NM_001082532:8129        | Pigyl         | DOWNSTREAM             | 0.955                                           | 0.562                          | 1214.44            | 682.11             | 0.536                          | 975.41             | 523.21             |
| A_68_P25948480 | chr8:72406164-72406208                            | NM_026818:5105           | Cilp2         | INSIDE                 | 0.955                                           | 2.802                          | 808.56             | 2265.30            | 2.676                          | 725.04             | 1939.95            |
| A_68_P23692831 | chr5:52506869-52506913                            | AK076709:-1661           |               | PROMOTER               | 0.955                                           | 0.376                          | 2779.84            | 1045.01            | 0.359                          | 2295.38            | 824.48             |
| A_68_P23195378 | chr4:107973651-107973695                          | NM_001033634:23          | Zyg11b        | INSIDE                 | 0.955                                           | 1.648                          | 3896.66            | 6421.32            | 1.574                          | 2909.28            | 4580.66            |
| A_68_P21144176 | chr2:37648649-37648693                            | NM_001163566:16902       | Crb2          | INSIDE                 | 0.955                                           | 1.526                          | 1569.46            | 2395.77            | 1.458                          | 1202.95            | 1753.73            |
| A_68_P20121785 | chr1:30930713-30930757                            | ENSMUST00000046443:-195  |               | PROMOTER               | 0.955                                           | 7.987                          | 666.86             | 5326.37            | 7.625                          | 733.93             | 5596.45            |
| A_68_P32546912 | chrX:94267952-94267996                            | NM_001033361:40          | Pgr15l        | INSIDE                 | 0.954                                           | 2.772                          | 240.76             | 667.36             | 2.644                          | 283.58             | 749.78             |
| A_68_P31940077 | chr19:7557297-7557341                             | NM_053076:453            | Rtn3          | INSIDE                 | 0.954                                           | 0.498                          | 3250.53            | 1619.59            | 0.475                          | 2216.31            | 1053.13            |
| A_68_P30346598 | chr15:76009831-76009878                           | NM_201394:16286          | Plec          | INSIDE                 | 0.954                                           | 2.388                          | 980.61             | 2341.62            | 2.277                          | 779.60             | 1775.52            |
| A_68_P30214224 | chr15:51871601-51871645                           | NM_175503:-30            | Aard          | PROMOTER               | 0.954                                           | 0.541                          | 1783.95            | 965.41             | 0.517                          | 1573.34            | 812.69             |
| A_68_P29977213 | chr15:3976841-3976885                             | NM_024188:435            | Oxct1         | INSIDE                 | 0.954                                           | 6.154                          | 655.84             | 4035.83            | 5.873                          | 510.25             | 2996.76            |
| A_68_P28576811 | chr12:81744792-81744836                           | NM_007951:34             | Erh           | INSIDE                 | 0.954                                           | 4.319                          | 4074.49            | 17598.06           | 4.121                          | 3124.92            | 12877.06           |
| A_68_P27977992 | chr1:84338560-84338604                            | NM_008498:454            | Lhx1          | INSIDE                 | 0.954                                           | 0.390                          | 1901.83            | 742.08             | 0.372                          | 1426.67            | 531.19             |
| A_68_P27271773 | chr10:77506098-77506142                           | NM_009646:205            | Aire          | INSIDE                 | 0.954                                           | 0.736                          | 3637.58            | 2676.33            | 0.702                          | 2824.02            | 1982.40            |
| A_68_P26055744 | chr8:93433014-93433058                            | NM_177224:80303          | Chd9          | INSIDE                 | 0.954                                           | 0.494                          | 943.57             | 465.94             | 0.471                          | 778.62             | 366.84             |
| A_68_P24972906 | chr7:13366070-13366114                            | NM_001017955:-5085       | Zscan18       | PROMOTER               | 0.954                                           | 2.170                          | 990.00             | 2148.62            | 2.071                          | 856.23             | 1773.12            |
| A_68_P21212089 | chr2:51004469-51004524                            | NM_028810:135            | Rnd3          | INSIDE                 | 0.954                                           | 3.152                          | 231.43             | 729.52             | 3.007                          | 237.97             | 715.48             |
| A_68_P20975260 | chr2:5634819-5634863                              | NM_177343:870            | Camk1d        | INSIDE                 | 0.954                                           | 0.290                          | 2539.15            | 736.88             | 0.277                          | 1575.43            | 436.31             |
| A_68_P20163208 | chr1:39044668-39044712                            | NM_026850:32             | Pdel3         | INSIDE                 | 0.954                                           | 3.577                          | 2710.75            | 9695.03            | 3.412                          | 2117.38            | 7225.53            |
| A_68_P20158328 | chr1:38267049-38267093                            | NM_010678:454730         | Afl3          | INSIDE                 | 0.954                                           | 2.250                          | 479.70             | 1079.47            | 2.146                          | 432.92             | 929.10             |
| A_68_P32128429 | chr19:43827379-43827423                           | NM_144874:90             | Cox15         | INSIDE                 | 0.953                                           | 0.422                          | 1579.30            | 667.07             | 0.403                          | 1182.88            | 476.14             |
| A_68_P32026439 | chr19:24975135-24975179                           | NM_008022:643            | Foxd4         | INSIDE                 | 0.953                                           | 0.436                          | 3179.01            | 1385.29            | 0.415                          | 2543.17            | 1056.33            |
| A_68_P31929908 | chr19:5654240-5654284                             | NM_001164480:9445        | Sipa1         | INSIDE                 | 0.953                                           | 2.383                          | 1105.88            | 2635.50            | 2.271                          | 887.52             | 2015.45            |
| A_68_P31161374 | chr17:36002854-36002898                           | NM_001146710:-196        | 2310014H01Rik | PROMOTER               | 0.953                                           | 0.414                          | 1567.42            | 648.93             | 0.395                          | 1103.54            | 435.49             |
| A_68_P30385309 | chr15:82729893-82729937                           | NR_027799:-1023          | Tbrg3         | PROMOTER               | 0.953                                           | 3.063                          | 524.75             | 1607.10            | 2.919                          | 484.63             | 1414.41            |
| A_68_P28577468 | chr12:81858602-81858646                           | NM_001008423:3078        | Gm1568        | INSIDE                 | 0.953                                           | 2.543                          | 1191.76            | 3030.34            | 2.423                          | 1000.72            | 2424.96            |
| A_68_P28277949 | chr12:19888314-19888358                           | ENSMUST00000103822:-9494 |               | PROMOTER               | 0.953                                           | 2.315                          | 1243.44            | 2878.61            | 2.206                          | 1088.77            | 2401.94            |
| A_68_P27813412 | chr11:54847029-54847073                           | NM_001110211:-77         | Anxa6         | PROMOTER               | 0.953                                           | 0.395                          | 1729.17            | 682.24             | 0.376                          | 1243.57            | 467.55             |
| A_68_P27630338 | chr11:20101951-20101995                           | NM_008996:368            | Rab1          | INSIDE                 | 0.953                                           | 2.233                          | 560.54             | 1251.59            | 2.128                          | 452.54             | 962.99             |
| A_68_P26717017 | chr9:90165120-90165164                            | NM_194334:465            | Tbcd12b       | INSIDE                 | 0.953                                           | 0.634                          | 2292.53            | 1454.47            | 0.605                          | 1752.05            | 1059.49            |
| A_68_P25016713 | chr7:28114386-28114430                            | NM_001113549:4259        | Ltp4          | INSIDE                 | 0.953                                           | 0.253                          | 1838.44            | 464.22             | 0.241                          | 1379.45            | 332.05             |
| A_68_P24820862 | chr6:125444303-125444347                          | NM_007657:449            | Cd9           | INSIDE                 | 0.953                                           | 0.428                          | 1976.49            | 845.62             | 0.408                          | 1502.00            | 612.46             |
| A_68_P24760447 | chr6:113554719-113554763                          | NM_133937:-25            | 6720456B07Rik | DIVERGENT_PROMOTER     | 0.953                                           | 25.109                         | 514.86             | 12927.87           | 23.932                         | 458.39             | 10970.03           |
| A_68_P24638016 | chr6:91235548-91235592                            |                          | Unknown       |                        | 0.953                                           | 4.944                          | 1143.62            | 5654.29            | 4.711                          | 868.04             | 4089.04            |
| A_68_P21906908 | chr2:180628801-180628845                          | NR_029538:78             | Mir124a-3     | DOWNSTREAM             | 0.953                                           | 2.517                          | 469.11             | 1180.83            | 2.398                          | 404.53             | 969.95             |
| A_68_P20353582 | chr1:75371730-75371774                            | NM_007463:-119           | Speg          | DIVERGENT_PROMOTER     | 0.953                                           | 0.245                          | 1914.64            | 468.50             | 0.233                          | 1356.61            | 316.19             |
| A_68_P32462527 | chrX:70667702-70667746                            | NM_009566:11283          | Zfp92         | INSIDE                 | 0.952                                           | 1.933                          | 611.50             | 1182.19            | 1.841                          | 822.53             | 1513.97            |
| A_68_P31112795 | chr17:26986945-26986989                           | NM_008700:-8456          | Nkx2-5        | PROMOTER               | 0.952                                           | 0.391                          | 1862.48            | 728.08             | 0.372                          | 1457.76            | 542.64             |
| A_68_P30379351 | chr15:81576109-81576153                           | NM_001081016:853         | Zc3h7b        | INSIDE                 | 0.952                                           | 0.442                          | 1827.87            | 808.44             | 0.421                          | 1483.37            | 624.37             |
| A_68_P30371299 | chr15:80117494-80117538                           | NM_001044308:-151        | Cacna1i       | PROMOTER               | 0.952                                           | 0.381                          | 1829.48            | 696.15             | 0.362                          | 1488.89            | 539.24             |
| A_68_P29056641 | chr13:55819458-55819502                           | NM_175150:3470           | Txncd15       | INSIDE                 | 0.952                                           | 2.061                          | 675.41             | 1391.73            | 1.962                          | 549.42             | 1078.06            |
| A_68_P28269097 | chr12:17183053-17183097                           | NM_201531:620            | Kcnfl         | INSIDE                 | 0.952                                           | 0.381                          | 1727.46            | 658.50             | 0.363                          | 1207.21            | 438.21             |
| A_68_P27470615 | chr10:115024818-115024862                         | NM_010195:-4             | Lgr5          | PROMOTER               | 0.952                                           | 0.504                          | 1825.73            | 920.63             | 0.480                          | 1328.38            | 637.91             |

| ProbeName      | Target position of probe on CpG island microarray | TargetID               | GeneSymbol    | CpG island Description | Ratio of relative methylation (TiO <sub>2</sub> -NP/Vehicle) | Sham group                     |                    |                    | TiO <sub>2</sub> -H group      |                    |                    |
|----------------|---------------------------------------------------|------------------------|---------------|------------------------|--------------------------------------------------------------|--------------------------------|--------------------|--------------------|--------------------------------|--------------------|--------------------|
|                |                                                   |                        |               |                        |                                                              | Relative methylation (Cy5/Cy3) | Cy3 signal (Input) | Cy5 signal (MeDIP) | Relative methylation (Cy5/Cy3) | Cy3 signal (Input) | Cy5 signal (MeDIP) |
| A_68_P26553627 | chr9:59333545-59333589                            | NM_019927:615          | Arlh1         | INSIDE                 | 0.952                                                        | 0.301                          | 1949.00            | 587.16             | 0.287                          | 1482.23            | 424.92             |
| A_68_P25848478 | chr8:49641171-49641215                            | NM_001145937:118852    | Odz3          | INSIDE                 | 0.952                                                        | 0.593                          | 2099.16            | 1245.06            | 0.565                          | 1762.29            | 995.21             |
| A_68_P25352337 | chr7:104937215-104937259                          | ENSMUST00000172423:186 |               | INSIDE                 | 0.952                                                        | 0.323                          | 1769.16            | 572.19             | 0.308                          | 1423.52            | 438.51             |
| A_68_P24374361 | chr6:37820805-37820849                            | NM_145076:16           | Trim24        | INSIDE                 | 0.952                                                        | 0.201                          | 3953.74            | 794.11             | 0.191                          | 2830.06            | 541.07             |
| A_68_P23809996 | chr5:75971773-75971817                            | NM_021099:779          | Kit           | INSIDE                 | 0.952                                                        | 0.600                          | 2177.02            | 1307.16            | 0.572                          | 1673.86            | 956.80             |
| A_68_P23397203 | chr4:148265241-148265285                          | NM_027195:86762        | Cas2l         | INSIDE                 | 0.952                                                        | 0.223                          | 3013.43            | 671.40             | 0.212                          | 2024.24            | 429.54             |
| A_68_P21611829 | chr2:126969142-126969186                          | NM_001163528:-838      | Itprp11       | PROMOTER               | 0.952                                                        | 0.648                          | 1494.33            | 967.99             | 0.616                          | 1323.46            | 815.81             |
| A_68_P21608667 | chr2:126379090-126379134                          | NM_011978:353          | Slc27a2       | INSIDE                 | 0.952                                                        | 0.541                          | 1727.79            | 935.13             | 0.515                          | 1295.53            | 667.24             |
| A_68_P32237966 | chrX:6895899-6895943                              | ENSMUST00000132126:376 |               | INSIDE                 | 0.951                                                        | 2.562                          | 366.58             | 939.10             | 2.437                          | 348.28             | 848.62             |
| A_68_P32114041 | chr19:41337635-41337679                           | NM_133352:838          | Tm9sE3        | INSIDE                 | 0.951                                                        | 0.623                          | 2125.77            | 1325.32            | 0.593                          | 1663.96            | 987.02             |
| A_68_P31928722 | chr19:5448027-5448071                             | NM_010235:351          | Fosl1         | INSIDE                 | 0.951                                                        | 1.610                          | 1785.20            | 2873.62            | 1.531                          | 1374.33            | 2103.63            |
| A_68_P31084704 | chr17:21146145-21146189                           | NM_145483:262          | Zip160        | INSIDE                 | 0.951                                                        | 0.367                          | 2962.94            | 1086.77            | 0.349                          | 2062.42            | 719.30             |
| A_68_P30366911 | chr15:79342352-79342396                           | NM_134090-4463         | Kdelr3        | DIVERGENT_PROMOTER     | 0.951                                                        | 0.298                          | 3891.61            | 1158.51            | 0.283                          | 2837.14            | 803.10             |
| A_68_P28729766 | chr12:109996154-109996198                         |                        | Unknown       | Unknown                | 0.951                                                        | 0.279                          | 3094.72            | 862.78             | 0.265                          | 2362.15            | 626.48             |
| A_68_P25958331 | chr8:74213094-74213138                            | NM_013564:-34          | Insl3         | PROMOTER               | 0.951                                                        | 1.974                          | 991.07             | 1956.20            | 1.878                          | 704.29             | 1322.60            |
| A_68_P25269029 | chr7:88005988-88006032                            | NM_009553:-983         | Zscan2        | PROMOTER               | 0.951                                                        | 0.525                          | 2620.57            | 1375.18            | 0.499                          | 2003.99            | 1000.03            |
| A_68_P24692854 | chr6:100513607-100513651                          | NM_181590:107523       | Shq1          | DOWNSTREAM             | 0.951                                                        | 0.450                          | 1737.50            | 781.63             | 0.428                          | 1383.26            | 591.83             |
| A_68_P24533020 | chr6:70741992-70742036                            | NM_009075:155          | Rpia          | INSIDE                 | 0.951                                                        | 1.997                          | 1285.24            | 2566.69            | 1.900                          | 1118.94            | 2125.63            |
| A_68_P24005309 | chr5:115108492-115108536                          | NM_022017:-84          | Trpv4         | PROMOTER               | 0.951                                                        | 0.457                          | 1616.67            | 738.26             | 0.434                          | 1369.29            | 594.57             |
| A_68_P24003587 | chr5:114830039-114830083                          | NM_001159941:454       | Kctd10        | INSIDE                 | 0.951                                                        | 0.110                          | 5608.44            | 615.19             | 0.104                          | 3565.90            | 371.99             |
| A_68_P23315908 | chr4:132686610-132686654                          | NM_153423:85           | Wasf2         | INSIDE                 | 0.951                                                        | 0.459                          | 1135.29            | 521.40             | 0.437                          | 815.64             | 356.27             |
| A_68_P22325399 | chr3:90268672-90268716                            | NM_008727:1094         | Npr1          | INSIDE                 | 0.951                                                        | 0.669                          | 2825.15            | 1889.82            | 0.636                          | 2219.89            | 1412.66            |
| A_68_P22130347 | chr3:51364112-51364156                            | NR_033624:456          | 50314340I1Rik | INSIDE                 | 0.951                                                        | 0.290                          | 1957.37            | 566.97             | 0.275                          | 1463.83            | 403.04             |
| A_68_P21628930 | chr2:130109870-130109914                          | NM_130884:295          | Idh3b         | INSIDE                 | 0.951                                                        | 0.110                          | 6816.57            | 750.11             | 0.105                          | 4758.89            | 497.76             |
| A_68_P20826008 | chr1:172995959-172996003                          | NM_010188:-6446        | Fcgr3         | PROMOTER               | 0.951                                                        | 0.148                          | 20653.91           | 3047.34            | 0.140                          | 16738.13           | 2348.72            |
| A_68_P20088276 | chr1:23389423-23389467                            | NM_001081079:570       | Ogfr1l        | INSIDE                 | 0.951                                                        | 3.453                          | 596.67             | 2060.17            | 3.285                          | 640.48             | 2103.72            |
| A_68_P32806294 | chrX:162878603-162878647                          | NM_177429:12           | Odf1          | INSIDE                 | 0.950                                                        | 2.839                          | 222.01             | 630.28             | 2.698                          | 317.95             | 857.78             |
| A_68_P31106579 | chr17:25969550-25969594                           | NM_019719:734          | Stub1         | INSIDE                 | 0.950                                                        | 0.182                          | 2846.91            | 517.75             | 0.173                          | 1874.35            | 323.93             |
| A_68_P31097499 | chr17:24607735-24607779                           | NM_025954:339          | Pgp           | INSIDE                 | 0.950                                                        | 0.358                          | 1523.23            | 545.66             | 0.340                          | 1161.71            | 395.48             |
| A_68_P30660864 | chr16:33966979-33967023                           | NM_009471:89           | Umps          | INSIDE                 | 0.950                                                        | 0.297                          | 1645.46            | 488.33             | 0.282                          | 1192.98            | 336.33             |
| A_68_P29116256 | chr13:69673614-69673658                           | NM_001169131:-894      | Papd7         | PROMOTER               | 0.950                                                        | 1.782                          | 3133.57            | 5583.19            | 1.692                          | 2276.11            | 3851.61            |
| A_68_P27542074 | chr10:128002848-128002892                         | NM_011119:120          | Pa2g4         | INSIDE                 | 0.950                                                        | 0.532                          | 1648.45            | 876.16             | 0.505                          | 1192.91            | 602.52             |
| A_68_P25094127 | chr7:52883891-52883935                            | NM_028544:1006         | Rasip1        | INSIDE                 | 0.950                                                        | 0.534                          | 1234.26            | 659.48             | 0.508                          | 1042.91            | 529.31             |
| A_68_P24156001 | chr5:144076400-144076444                          | NM_172726:617          | E130309D02Rik | INSIDE                 | 0.950                                                        | 3.007                          | 1134.56            | 3411.54            | 2.855                          | 894.36             | 2553.48            |
| A_68_P23415895 | chr4:151370916-151370960                          | NM_172705:-650         | Hlf13         | PROMOTER               | 0.950                                                        | 0.443                          | 1195.88            | 529.50             | 0.420                          | 916.87             | 385.54             |
| A_68_P23249523 | chr4:119821508-119821552                          |                        | Unknown       | Unknown                | 0.950                                                        | 3.950                          | 1371.78            | 5418.28            | 3.753                          | 1144.64            | 4295.67            |
| A_68_P22869479 | chr4:43023268-43023312                            | NM_001163233:-117      | Fancg         | PROMOTER               | 0.950                                                        | 0.422                          | 3861.33            | 1627.82            | 0.401                          | 2913.93            | 1167.37            |
| A_68_P21101092 | chr2:29917364-29917408                            | NM_023871:-129         | Set           | PROMOTER               | 0.950                                                        | 0.353                          | 2586.79            | 914.26             | 0.336                          | 2114.54            | 710.18             |
| A_68_P20826589 | chr1:173126188-173126232                          | NM_025557:189          | Pcp4l1        | INSIDE                 | 0.950                                                        | 0.627                          | 1643.54            | 1031.12            | 0.596                          | 1370.98            | 817.17             |
| A_68_P20618861 | chr1:133904468-133904512                          | NM_007923:309          | Elk4          | INSIDE                 | 0.950                                                        | 0.382                          | 2661.33            | 1017.47            | 0.363                          | 1919.10            | 697.38             |
| A_68_P20241451 | chr1:55419724-55419768                            | NM_001113367:-195      | Boll          | PROMOTER               | 0.950                                                        | 1.614                          | 1176.00            | 1897.76            | 1.533                          | 1052.12            | 1612.76            |
| A_68_P29678557 | chr14:66916156-66916200                           | NR_038077:-212         | 1700001G11Rik | PROMOTER               | 0.949                                                        | 1.974                          | 1068.94            | 2109.85            | 1.873                          | 807.93             | 1513.15            |
| A_68_P28221296 | chr12:8305454-8305498                             | NM_013527:3284         | Gdf7          | INSIDE                 | 0.949                                                        | 2.015                          | 1363.58            | 2747.18            | 1.912                          | 1050.22            | 2008.48            |
| A_68_P28185372 | chr11:120433823-120433867                         | NM_011032:406          | P4hb          | INSIDE                 | 0.949                                                        | 0.561                          | 1831.46            | 1026.93            | 0.532                          | 1425.14            | 758.13             |
| A_68_P25411548 | chr7:117205451-117205495                          | NM_009281:257          | Zip143        | INSIDE                 | 0.949                                                        | 3.076                          | 322.04             | 990.44             | 2.918                          | 317.91             | 927.53             |
| A_68_P24906444 | chr6:142705194-142705238                          | NM_009908:11           | Cmas          | INSIDE                 | 0.949                                                        | 4.541                          | 1288.03            | 5848.82            | 4.309                          | 1265.54            | 5453.32            |
| A_68_P24758829 | chr6:113276600-113276644                          | NM_010957:-347         | Ogg1          | PROMOTER               | 0.949                                                        | 0.346                          | 1668.33            | 577.08             | 0.328                          | 1289.18            | 422.98             |
| A_68_P23364321 | chr4:141034275-141034319                          | NM_019763:60216        | Spen          | INSIDE                 | 0.949                                                        | 1.768                          | 912.18             | 1612.28            | 1.677                          | 837.06             | 1403.96            |
| A_68_P23278550 | chr4:125840298-125840342                          | NM_025856:-411         | 1700029G01Rik | PROMOTER               | 0.949                                                        | 0.741                          | 3287.32            | 2436.32            | 0.703                          | 2414.52            | 1698.30            |
| A_68_P22423108 | chr3:110052868-110052912                          | NR_024139:1026         | Pmtf6         | INSIDE                 | 0.949                                                        | 1.688                          | 1577.36            | 2663.15            | 1.603                          | 1301.78            | 2086.73            |
| A_68_P21115152 | chr2:32251192-32251236                            | NM_133783:-195         | Ptges2        | DIVERGENT_PROMOTER     | 0.949                                                        | 0.562                          | 2130.11            | 1196.62            | 0.533                          | 1500.54            | 800.32             |
| A_68_P20556979 | chr1:121319156-121319200                          | NM_008381:-353         | Inhbb         | PROMOTER               | 0.949                                                        | 0.552                          | 1499.06            | 826.87             | 0.524                          | 1220.99            | 639.38             |
| A_68_P32044142 | chr19:28086118-28086162                           | NM_011265:-484         | Rfx3          | PROMOTER               | 0.948                                                        | 0.215                          | 3738.35            | 804.02             | 0.204                          | 2757.39            | 562.42             |
| A_68_P29667752 | chr14:65059421-65059465                           | NM_026322:15298        | Msr4          | INSIDE                 | 0.948                                                        | 0.580                          | 1203.59            | 698.34             | 0.550                          | 1067.19            | 587.16             |
| A_68_P28576810 | chr12:81744684-81744728                           | NM_007951:142          | Erh           | INSIDE                 | 0.948                                                        | 0.433                          | 3661.19            | 1583.62            | 0.410                          | 2791.27            | 1144.77            |
| A_68_P28123543 | chr11:110198733-110198777                         | NM_147219:276          | Abea5         | INSIDE                 | 0.948                                                        | 0.724                          | 4895.87            | 3542.61            | 0.686                          | 3795.13            | 2603.84            |
| A_68_P27954273 | chr11:80241942-80241986                           | NM_178616:-152         | Psm11         | PROMOTER               | 0.948                                                        | 0.479                          | 1909.78            | 915.41             | 0.455                          | 1416.29            | 643.72             |
| A_68_P27835013 | chr11:58948172-58948216                           | NM_001171512:1683      | Obscn         | INSIDE                 | 0.948                                                        | 0.665                          | 1514.17            | 1007.68            | 0.631                          | 1167.29            | 736.82             |
| A_68_P26884795 | chr9:121578529-121578573                          | NM_011703:26717        | Vipr1         | INSIDE                 | 0.948                                                        | 0.342                          | 2530.63            | 864.56             | 0.324                          | 1716.93            | 556.11             |
| A_68_P26574055 | chr9:62986668-62986712                            | NM_172446:8097         | Skor1         | INSIDE                 | 0.948                                                        | 0.539                          | 2253.90            | 1215.15            | 0.511                          | 1754.68            | 897.14             |
| A_68_P26246004 | chr8:127044817-127044861                          | NM_029746:172          | Cog2          | INSIDE                 | 0.948                                                        | 0.312                          | 1499.99            | 467.30             | 0.295                          | 1131.03            | 333.92             |
| A_68_P25958416 | chr8:74225606-74225650                            | NM_028189:71           | B3gnt3        | INSIDE                 | 0.948                                                        | 0.635                          | 1568.06            | 995.51             | 0.602                          | 1155.07            | 695.07             |
| A_68_P25589127 | chr7:148667760-148667804                          | NM_053082:6644         | Tspan4        | INSIDE                 | 0.948                                                        | 0.355                          | 3724.92            | 1320.60            | 0.336                          | 2304.96            | 775.06             |
| A_68_P24838519 | chr6:128305511-128305555                          | NM_011657:337          | Tulp3         | INSIDE                 | 0.948                                                        | 0.354                          | 4964.31            | 1758.10            | 0.336                          | 3609.28            | 1211.74            |
| A_68_P24141813 | chr5:141000344-141000388                          | NM_021528:18804        | Chst12        | INSIDE                 | 0.948                                                        | 2.020                          | 774.68             | 1564.64            | 1.914                          | 571.59             | 1094.27            |

| ProbeName      | Target position of probe on CpG island microarray | TargetID                 | GeneSymbol    | CpG island Description | Ratio of relative methylation (TiO <sub>2</sub> -NP/Vehicle) | Sham group                     |                    |                    | TiO <sub>2</sub> -H group      |                    |                    |
|----------------|---------------------------------------------------|--------------------------|---------------|------------------------|--------------------------------------------------------------|--------------------------------|--------------------|--------------------|--------------------------------|--------------------|--------------------|
|                |                                                   |                          |               |                        |                                                              | Relative methylation (Cy5/Cy3) | Cy3 signal (Input) | Cy5 signal (MeDIP) | Relative methylation (Cy5/Cy3) | Cy3 signal (Input) | Cy5 signal (MeDIP) |
| A_68_P23591272 | chr5:34163692-34163736                            | ENSMUST00000168912:-590  |               | PROMOTER               | 0.948                                                        | 2.483                          | 1497.85            | 3719.22            | 2.353                          | 1241.07            | 2920.29            |
| A_68_P23327085 | chr4:134731250-134731294                          | NM_019732:54713          | Runx3         | INSIDE                 | 0.948                                                        | 0.504                          | 3384.69            | 1704.88            | 0.478                          | 2355.45            | 1125.10            |
| A_68_P23314345 | chr4:132399162-132399206                          | NM_146154:-100           | Ppp1r8        | PROMOTER               | 0.948                                                        | 4.156                          | 1912.04            | 7946.14            | 3.940                          | 1652.28            | 6509.78            |
| A_68_P23232549 | chr4:116793686-116793730                          | NR_024078:4622           | Btbd19        | INSIDE                 | 0.948                                                        | 0.481                          | 1179.81            | 567.71             | 0.456                          | 995.59             | 454.36             |
| A_68_P30981937 | chr16:94748428-94748472                           | NM_007834:-214           | Dscr3         | PROMOTER               | 0.947                                                        | 2.560                          | 864.14             | 2212.10            | 2.425                          | 790.72             | 1917.25            |
| A_68_P30567432 | chr16:15887571-15887615                           | NM_007679:214            | Cebpd         | INSIDE                 | 0.947                                                        | 0.398                          | 3561.00            | 1417.19            | 0.377                          | 2530.23            | 953.66             |
| A_68_P30346578 | chr15:76007226-76007270                           | NM_201394:18892          | Plec          | INSIDE                 | 0.947                                                        | 3.004                          | 1762.26            | 5294.54            | 2.845                          | 1325.51            | 3770.46            |
| A_68_P29614457 | chr14:55433063-55433107                           | ENSMUST00000095853:-2239 |               | PROMOTER               | 0.947                                                        | 5.294                          | 329.96             | 1746.73            | 5.013                          | 272.22             | 1364.61            |
| A_68_P29020673 | chr13:48758866-48758910                           | NM_007526:484            | Barx1         | INSIDE                 | 0.947                                                        | 0.439                          | 1008.30            | 442.28             | 0.415                          | 736.67             | 305.90             |
| A_68_P28888883 | chr13:24853418-24853464                           | NM_020567:366            | Gmnn          | INSIDE                 | 0.947                                                        | 0.616                          | 2580.64            | 1590.74            | 0.584                          | 1859.07            | 1085.58            |
| A_68_P28606270 | chr12:87166109-87166153                           | NM_001081423:231         | Till5         | INSIDE                 | 0.947                                                        | 2.368                          | 928.86             | 2199.72            | 2.243                          | 798.41             | 1790.77            |
| A_68_P27623991 | chr11:18919088-18919132                           | NM_001193271:-138        | Meis1         | PROMOTER               | 0.947                                                        | 0.649                          | 5092.37            | 3303.60            | 0.614                          | 3184.70            | 1955.56            |
| A_68_P27095620 | chr10:42292871-42292915                           | NM_152229:10502          | Nr2c1         | INSIDE                 | 0.947                                                        | 2.354                          | 397.51             | 935.58             | 2.230                          | 312.00             | 695.69             |
| A_68_P26574104 | chr9:62992857-62992901                            | NM_172446:1909           | Skor1         | INSIDE                 | 0.947                                                        | 0.496                          | 894.84             | 444.11             | 0.470                          | 766.57             | 360.40             |
| A_68_P26467841 | chr9:44291334-44291378                            | ENSMUST00000136322:4496  |               | DOWNSTREAM             | 0.947                                                        | 2.071                          | 1828.49            | 3786.13            | 1.961                          | 1529.57            | 2999.83            |
| A_68_P26258420 | chr8:129116753-129116797                          | NM_001164598:562         | Irf2bp2       | INSIDE                 | 0.947                                                        | 1.586                          | 1504.05            | 2386.13            | 1.503                          | 1119.12            | 1681.74            |
| A_68_P26204794 | chr8:120325573-120325617                          | NM_026758:235            | Mphosph6      | INSIDE                 | 0.947                                                        | 0.473                          | 1445.21            | 684.19             | 0.448                          | 1124.42            | 504.14             |
| A_68_P25954612 | chr8:73392998-73393042                            | NM_026964:4369           | Ccdc124       | INSIDE                 | 0.947                                                        | 4.541                          | 181.89             | 825.93             | 4.300                          | 142.17             | 611.30             |
| A_68_P25081793 | chr7:50568397-50568441                            | NM_027264:213            | Zfp715        | INSIDE                 | 0.947                                                        | 0.329                          | 5770.75            | 1895.93            | 0.311                          | 4203.69            | 1307.21            |
| A_68_P24951460 | chr7:4945585-4945629                              | NM_026741:2097           | Zfp579        | INSIDE                 | 0.947                                                        | 2.048                          | 2015.46            | 4127.87            | 1.939                          | 1497.17            | 2903.14            |
| A_68_P24859168 | chr6:133985011-133985055                          | NM_007961:-692           | Etv6          | PROMOTER               | 0.947                                                        | 0.302                          | 2333.91            | 703.89             | 0.286                          | 1662.23            | 474.85             |
| A_68_P23977770 | chr5:110530585-110530629                          | NR_027665:1029           | Plexd1        | INSIDE                 | 0.947                                                        | 0.573                          | 3175.92            | 1821.27            | 0.543                          | 2516.49            | 1367.06            |
| A_68_P21706642 | chr2:144156624-144156668                          | NM_152947:452            | Ovol2         | INSIDE                 | 0.947                                                        | 0.499                          | 2151.20            | 1073.68            | 0.473                          | 1552.02            | 733.36             |
| A_68_P21246537 | chr2:58210184-58210228                            | NM_001111030:-37         | Acvr1c        | PROMOTER               | 0.947                                                        | 0.518                          | 978.53             | 506.55             | 0.490                          | 754.87             | 370.19             |
| A_68_P21137725 | chr2:35946616-35946662                            | NM_001083126:12942       | Lhx6          | INSIDE                 | 0.947                                                        | 0.283                          | 1769.16            | 500.15             | 0.268                          | 1327.35            | 355.51             |
| A_68_P21095253 | chr2:28981070-28981114                            | NM_198033:581            | Setx          | INSIDE                 | 0.947                                                        | 0.469                          | 1175.48            | 550.76             | 0.444                          | 976.02             | 432.93             |
| A_68_P32257884 | chrX:11241665-11241709                            |                          | Unknown       | Unknown                | 0.946                                                        | 0.670                          | 1423.31            | 954.20             | 0.634                          | 1980.90            | 1255.84            |
| A_68_P31792975 | chr18:67801303-67801347                           | NM_134138:72             | Psmg2         | INSIDE                 | 0.946                                                        | 3.415                          | 3821.13            | 13051.04           | 3.233                          | 2977.62            | 9625.28            |
| A_68_P31334604 | chr17:71824355-71824399                           | NM_028887:307            | Smehd1        | INSIDE                 | 0.946                                                        | 0.442                          | 3482.71            | 1540.47            | 0.418                          | 2672.97            | 1118.07            |
| A_68_P31149742 | chr17:33766187-33766231                           | NM_026712:172            | Zfp414        | INSIDE                 | 0.946                                                        | 0.135                          | 7228.92            | 972.80             | 0.127                          | 5426.96            | 690.52             |
| A_68_P31097234 | chr17:24563606-24563650                           | NM_010023:1              | Eci1          | INSIDE                 | 0.946                                                        | 0.401                          | 1155.13            | 463.09             | 0.379                          | 897.35             | 340.31             |
| A_68_P30337609 | chr15:74348773-74348817                           | NM_174991:2169           | Bai1          | INSIDE                 | 0.946                                                        | 0.424                          | 2386.32            | 1012.51            | 0.401                          | 1776.18            | 712.87             |
| A_68_P27936386 | chr11:77029527-77029571                           | NM_177710:-378           | Ssh2          | PROMOTER               | 0.946                                                        | 4.461                          | 1642.69            | 7328.86            | 4.219                          | 1608.98            | 6788.25            |
| A_68_P27542072 | chr10:128002612-128002656                         | NM_011119:356            | Pa2g4         | INSIDE                 | 0.946                                                        | 0.197                          | 7141.55            | 1409.22            | 0.187                          | 4701.73            | 877.80             |
| A_68_P27085192 | chr10:40403058-40403102                           | NM_177793:-7             | 9030224M15Rik | PROMOTER               | 0.946                                                        | 0.488                          | 1643.71            | 802.09             | 0.462                          | 1240.85            | 573.07             |
| A_68_P26885383 | chr9:121668227-121668271                          | NR_033503:813            | E530011L22Rik | INSIDE                 | 0.946                                                        | 0.581                          | 2194.67            | 1274.37            | 0.549                          | 1509.09            | 828.67             |
| A_68_P25945205 | chr8:71404661-71404705                            | NM_008509:229            | Lpl           | INSIDE                 | 0.946                                                        | 0.345                          | 1435.29            | 495.09             | 0.326                          | 1147.36            | 374.30             |
| A_68_P25093840 | chr7:52825839-52825883                            | NM_009737:128            | Beat2         | INSIDE                 | 0.946                                                        | 0.213                          | 2342.00            | 499.28             | 0.202                          | 1812.00            | 365.39             |
| A_68_P24008368 | chr5:115643546-115643590                          | NM_013879-7438           | Cabp1         | PROMOTER               | 0.946                                                        | 0.503                          | 2028.29            | 1021.18            | 0.476                          | 1558.06            | 742.33             |
| A_68_P24003591 | chr5:114830465-114830509                          | NM_001159941:28          | Kctd10        | INSIDE                 | 0.946                                                        | 0.348                          | 2076.98            | 722.41             | 0.329                          | 1631.84            | 536.72             |
| A_68_P23956957 | chr5:106161002-106161046                          | NM_178701:31196          | Lrcc8d        | INSIDE                 | 0.946                                                        | 0.483                          | 1058.97            | 511.60             | 0.457                          | 967.34             | 442.05             |
| A_68_P23145550 | chr4:99323204-99323248                            | NM_010425:237            | Foxd3         | INSIDE                 | 0.946                                                        | 0.422                          | 1748.76            | 737.14             | 0.399                          | 1341.62            | 534.73             |
| A_68_P22905953 | chr4:49609903-49609947                            | NM_025944:818            | 2810432L12Rik | INSIDE                 | 0.946                                                        | 0.617                          | 2400.90            | 1480.40            | 0.583                          | 1764.98            | 1029.56            |
| A_68_P21748795 | chr2:152158169-152158213                          | NM_001083921:-29         | Rbck1         | PROMOTER               | 0.946                                                        | 0.488                          | 1523.66            | 742.90             | 0.461                          | 1206.21            | 556.49             |
| A_68_P21007903 | chr2:11698976-11699020                            | NM_015792:156            | Fbxo18        | INSIDE                 | 0.946                                                        | 0.424                          | 4018.10            | 1703.39            | 0.401                          | 2860.23            | 1146.88            |
| A_68_P33007794 | chr4_random:128835-128879                         | NM_001033326:19055       | Dhrsx         | INSIDE                 | 0.945                                                        | 7.967                          | 4445.52            | 35419.19           | 7.526                          | 2869.74            | 21598.74           |
| A_68_P32704866 | chrX:138159789-138159833                          | NM_010572:-50            | Irs4          | PROMOTER               | 0.945                                                        | 1.860                          | 514.09             | 956.25             | 1.758                          | 675.90             | 1188.28            |
| A_68_P28976951 | chr13:41345598-41345642                           | NM_001135577:408         | BC024659      | INSIDE                 | 0.945                                                        | 0.286                          | 2701.28            | 772.32             | 0.270                          | 1929.35            | 521.19             |
| A_68_P28597424 | chr12:85626225-85626269                           | NM_029880:-17            | Ptgr2         | PROMOTER               | 0.945                                                        | 0.319                          | 1525.25            | 486.63             | 0.301                          | 992.96             | 299.23             |
| A_68_P28170157 | chr11:118109191-118109235                         | NM_001112699:694         | Cytl1         | INSIDE                 | 0.945                                                        | 0.323                          | 2514.79            | 813.31             | 0.306                          | 1748.97            | 534.58             |
| A_68_P27661782 | chr11:26110649-26110693                           | NR_027973:-94            | 5730522E02Rik | PROMOTER               | 0.945                                                        | 0.521                          | 1066.48            | 555.32             | 0.492                          | 829.66             | 408.16             |
| A_68_P27284102 | chr10:80040405-80040449                           | NM_078477:-385           | Klrf16        | PROMOTER               | 0.945                                                        | 0.155                          | 5362.37            | 829.25             | 0.146                          | 3428.03            | 501.22             |
| A_68_P26821062 | chr9:109834457-109834501                          | NM_001205331:201         | Mtap4         | INSIDE                 | 0.945                                                        | 0.276                          | 2516.16            | 695.47             | 0.261                          | 1779.82            | 464.75             |
| A_68_P26350217 | chr9:21855419-21855463                            | NM_010487:1027           | Elavl3        | INSIDE                 | 0.945                                                        | 1.898                          | 735.73             | 1396.44            | 1.793                          | 623.40             | 1117.59            |
| A_68_P24990794 | chr7:19577916-19577960                            | NM_145579:1345           | Mypop         | INSIDE                 | 0.945                                                        | 0.442                          | 1178.51            | 520.36             | 0.417                          | 843.78             | 351.93             |
| A_68_P24908778 | chr6:143116037-143116081                          | NM_029250:309            | Etnk1         | INSIDE                 | 0.945                                                        | 3.089                          | 895.11             | 2764.68            | 2.918                          | 688.22             | 2008.45            |
| A_68_P24336410 | chr6:31166769-31166813                            | ENSMUST00000115107:1643  |               | INSIDE                 | 0.945                                                        | 0.671                          | 1735.22            | 1165.10            | 0.635                          | 1368.28            | 868.65             |
| A_68_P24111877 | chr5:134660494-134660538                          | NM_053266:609            | Gtf2ird2      | INSIDE                 | 0.945                                                        | 0.667                          | 3132.48            | 2090.11            | 0.630                          | 2461.34            | 1551.51            |
| A_68_P23317815 | chr4:133036401-133036445                          | NM_175307:375            | Fam46b        | INSIDE                 | 0.945                                                        | 0.450                          | 1765.07            | 794.74             | 0.426                          | 1289.18            | 548.67             |
| A_68_P23176715 | chr4:104782702-104782746                          | NM_178143:-221           | Prkaa2        | PROMOTER               | 0.945                                                        | 0.214                          | 2386.08            | 510.77             | 0.202                          | 1867.04            | 377.59             |
| A_68_P21957225 | chr3:14533992-14534036                            | NM_001163579:227         | Lrrcc1        | INSIDE                 | 0.945                                                        | 0.644                          | 3110.82            | 2003.29            | 0.608                          | 2264.95            | 1377.89            |
| A_68_P21824071 | chr2:165298510-165298554                          | NM_054055:165            | Slc13a3       | INSIDE                 | 0.945                                                        | 0.425                          | 3532.93            | 1502.31            | 0.402                          | 2631.50            | 1057.52            |
| A_68_P21747512 | chr2:151907346-151907390                          | NM_001160410:104         | Scrt2         | INSIDE                 | 0.945                                                        | 1.872                          | 839.38             | 1571.01            | 1.768                          | 673.77             | 1191.34            |
| A_68_P32143179 | chr19:46391989-46392033                           | NM_028627:9636           | Psd           | INSIDE                 | 0.944                                                        | 0.476                          | 3906.90            | 1860.30            | 0.449                          | 2950.64            | 1325.71            |
| A_68_P31629837 | chr18:37913139-37913183                           | NM_033594:-2266          | Pcdhga11      | PROMOTER               | 0.944                                                        | 2.827                          | 925.23             | 2615.44            | 2.668                          | 711.73             | 1898.59            |

| ProbeName      | Target position of probe on CpG island microarray | TargetID                 | GeneSymbol    | CpG island Description | Ratio of relative methylation (TiO <sub>2</sub> -NP/Vehicle) | Sham group                     |                    |                    | TiO <sub>2</sub> -H group      |                    |                    |
|----------------|---------------------------------------------------|--------------------------|---------------|------------------------|--------------------------------------------------------------|--------------------------------|--------------------|--------------------|--------------------------------|--------------------|--------------------|
|                |                                                   |                          |               |                        |                                                              | Relative methylation (Cy5/Cy3) | Cy3 signal (Input) | Cy5 signal (MeDIP) | Relative methylation (Cy5/Cy3) | Cy3 signal (Input) | Cy5 signal (MeDIP) |
| A_68_P31162742 | chr17:36282712-36282756                           | NR_033517:772            | 24100171I7Rik | INSIDE                 | 0.944                                                        | 0.627                          | 2925.32            | 1833.20            | 0.592                          | 2391.98            | 1415.60            |
| A_68_P31126787 | chr17:29374609-29374653                           | NM_153166:105            | Cpne5         | INSIDE                 | 0.944                                                        | 0.394                          | 1603.81            | 631.96             | 0.372                          | 1266.82            | 471.15             |
| A_68_P30786985 | chr16:57549214-57549258                           | NM_001177871:-118        | Filip1l       | PROMOTER               | 0.944                                                        | 0.510                          | 1012.48            | 516.40             | 0.481                          | 863.60             | 415.80             |
| A_68_P30562965 | chr16:14706121-14706170                           | NM_011415:194            | Snai2         | INSIDE                 | 0.944                                                        | 0.231                          | 2688.76            | 620.80             | 0.218                          | 1748.75            | 380.95             |
| A_68_P30365306 | chr15:79082860-79082904                           | NM_020516:2296           | Slc16a8       | INSIDE                 | 0.944                                                        | 0.667                          | 3714.92            | 2478.77            | 0.630                          | 2717.22            | 1711.92            |
| A_68_P30346972 | chr15:76062477-76062521                           | NM_001163542:-690        | Plec          | PROMOTER               | 0.944                                                        | 0.442                          | 1203.05            | 532.16             | 0.417                          | 983.72             | 410.70             |
| A_68_P29750658 | chr14:79701016-79701060                           | NM_025427:404            | 1190002H23Rik | INSIDE                 | 0.944                                                        | 0.478                          | 1085.13            | 518.33             | 0.451                          | 714.53             | 322.16             |
| A_68_P29445599 | chr14:21001120-21001164                           | NM_021542:-138           | Kcnk5         | PROMOTER               | 0.944                                                        | 0.406                          | 1549.00            | 628.73             | 0.383                          | 1044.01            | 399.90             |
| A_68_P29440559 | chr14:19725789-19725833                           | NM_144839:331            | Ube2e2        | INSIDE                 | 0.944                                                        | 0.390                          | 1439.37            | 561.38             | 0.368                          | 1151.77            | 423.94             |
| A_68_P28941008 | chr13:34967652-34967696                           | NM_013830:312            | Ptp4b         | INSIDE                 | 0.944                                                        | 0.415                          | 1391.70            | 578.14             | 0.392                          | 1118.45            | 438.60             |
| A_68_P28778249 | chr12:119437163-119437207                         | NM_010060:332            | Dnahc11       | INSIDE                 | 0.944                                                        | 0.558                          | 1986.18            | 1108.51            | 0.527                          | 1678.04            | 884.46             |
| A_68_P28671531 | chr12:99927688-99927737                           | NM_011877:45143          | Ptpn21        | INSIDE                 | 0.944                                                        | 1.820                          | 1081.09            | 1967.76            | 1.718                          | 933.44             | 1603.47            |
| A_68_P28597122 | chr12:85559358-85559402                           | NM_001163501:451         | C130039O16Rik | INSIDE                 | 0.944                                                        | 0.638                          | 1357.23            | 865.75             | 0.602                          | 1152.12            | 693.56             |
| A_68_P28252842 | chr12:14156956-14157000                           | NM_029007:1866           | Fam84a        | INSIDE                 | 0.944                                                        | 2.617                          | 688.60             | 1802.41            | 2.470                          | 581.94             | 1437.57            |
| A_68_P27896202 | chr11:69446325-69446369                           | NM_011814:-126           | Fxr2          | PROMOTER               | 0.944                                                        | 0.613                          | 1962.29            | 1202.96            | 0.579                          | 1406.21            | 814.18             |
| A_68_P25481818 | chr7:130113250-130113294                          | NM_175023:-805           | Rbbp6         | PROMOTER               | 0.944                                                        | 1.689                          | 1039.03            | 1754.88            | 1.594                          | 956.29             | 1524.73            |
| A_68_P24980794 | chr7:16899349-16899393                            | NM_133234:4439           | Bbc3          | INSIDE                 | 0.944                                                        | 0.267                          | 1681.47            | 448.93             | 0.252                          | 1384.17            | 348.84             |
| A_68_P24955007 | chr7:6282885-6282929                              | NM_001033249:-870        | Zfp583        | PROMOTER               | 0.944                                                        | 0.418                          | 1449.78            | 605.61             | 0.394                          | 1256.70            | 495.53             |
| A_68_P24513202 | chr6:65621890-65621934                            | NM_172399:308            | A930038C07Rik | INSIDE                 | 0.944                                                        | 4.134                          | 624.51             | 2581.41            | 3.903                          | 477.28             | 1863.05            |
| A_68_P22820135 | chr4:32325268-32325312                            | ENSMUST00000108180:-488  |               | PROMOTER               | 0.944                                                        | 0.429                          | 2141.97            | 918.05             | 0.404                          | 1537.60            | 621.88             |
| A_68_P22477034 | chr3:121235139-121235183                          | NM_145394:102            | Slc44a3       | INSIDE                 | 0.944                                                        | 1.894                          | 1043.06            | 1975.86            | 1.788                          | 965.36             | 1726.50            |
| A_68_P21112314 | chr2:31806123-31806167                            | NM_145144:322            | Aif1l         | INSIDE                 | 0.944                                                        | 0.163                          | 4328.44            | 707.50             | 0.154                          | 2969.52            | 458.13             |
| A_68_P20826030 | chr1:173000636-173000680                          | ENSMUST00000164179:-5592 |               | PROMOTER               | 0.944                                                        | 0.200                          | 5439.43            | 1086.40            | 0.189                          | 4201.29            | 792.36             |
| A_68_P20989756 | chr15:6659356-6659404                             | NM_030168:1000           | Rictor        | INSIDE                 | 0.943                                                        | 4.032                          | 500.41             | 2017.57            | 3.804                          | 391.51             | 1489.21            |
| A_68_P29033459 | chr13:51740974-51741018                           | NM_025415:396            | Cks2          | INSIDE                 | 0.943                                                        | 0.404                          | 3731.67            | 1506.16            | 0.381                          | 2734.87            | 1041.25            |
| A_68_P28833517 | chr13:13485882-13485926                           | NM_031999:-13            | Gpr137b       | PROMOTER               | 0.943                                                        | 0.323                          | 2251.88            | 726.78             | 0.304                          | 1899.52            | 578.39             |
| A_68_P28153128 | chr11:115235533-115235577                         | NM_175454:-6521          | C630004H02Rik | DIVERGENT_PROMOTER     | 0.943                                                        | 0.474                          | 1373.12            | 650.85             | 0.447                          | 1014.98            | 453.91             |
| A_68_P27790975 | chr11:50673295-50673343                           | NM_173372:9132           | Grm6          | INSIDE                 | 0.943                                                        | 2.272                          | 1748.84            | 3973.19            | 2.143                          | 1285.29            | 2753.78            |
| A_68_P27536452 | chr10:126971104-126971148                         | NM_183297:489            | Nxph4         | INSIDE                 | 0.943                                                        | 0.092                          | 11811.39           | 1088.27            | 0.087                          | 6870.62            | 597.22             |
| A_68_P27360774 | chr10:94151095-94151139                           | NR_015524:242            | 4932415G12Rik | INSIDE                 | 0.943                                                        | 0.332                          | 2274.23            | 755.87             | 0.313                          | 1726.66            | 540.90             |
| A_68_P26968175 | chr10:20032280-20032325                           | NM_001025392:28          | Bclaf1        | INSIDE                 | 0.943                                                        | 0.350                          | 1638.62            | 574.31             | 0.330                          | 1367.80            | 451.87             |
| A_68_P26872302 | chr9:119336590-119336634                          | NM_007397:24994          | Acvr2b        | INSIDE                 | 0.943                                                        | 1.983                          | 1756.76            | 3482.89            | 1.869                          | 1204.64            | 2251.52            |
| A_68_P26421200 | chr9:35007442-35007486                            | NM_001177847:26          | Tirap         | INSIDE                 | 0.943                                                        | 0.245                          | 2612.03            | 640.60             | 0.231                          | 2174.02            | 502.74             |
| A_68_P25505763 | chr7:134622752-134622796                          | NM_010183:-5960          | Fbrs          | PROMOTER               | 0.943                                                        | 2.275                          | 486.18             | 1105.98            | 2.145                          | 391.92             | 840.73             |
| A_68_P25087554 | chr7:51718274-51718318                            | NM_198250:20440          | Lrrc4b        | INSIDE                 | 0.943                                                        | 0.525                          | 1090.50            | 572.69             | 0.495                          | 864.83             | 428.45             |
| A_68_P25044864 | chr7:35439779-35439823                            | NM_146188:-1940          | Kctd15        | PROMOTER               | 0.943                                                        | 0.427                          | 1326.04            | 566.55             | 0.403                          | 964.07             | 388.35             |
| A_68_P24772420 | chr6:115626105-115626149                          | NM_029780:527            | Raf1          | INSIDE                 | 0.943                                                        | 6.116                          | 306.97             | 1877.31            | 5.764                          | 302.38             | 1742.92            |
| A_68_P23576660 | chr5:31439871-31439915                            | NM_021447:20908          | Trim54        | INSIDE                 | 0.943                                                        | 0.637                          | 1392.70            | 887.26             | 0.601                          | 1079.22            | 648.37             |
| A_68_P21339747 | chr2:74663863-74663907                            | NM_016804:16             | Mtx2          | INSIDE                 | 0.943                                                        | 2.686                          | 417.78             | 1122.11            | 2.534                          | 355.03             | 899.65             |
| A_68_P21266387 | chr2:61643809-61643853                            | NM_009322:1321           | Tbr1          | INSIDE                 | 0.943                                                        | 0.255                          | 3761.07            | 960.32             | 0.241                          | 3007.63            | 724.05             |
| A_68_P21117858 | chr2:32702735-32702779                            | NM_009295:-4             | Stxbp1        | PROMOTER               | 0.943                                                        | 2.228                          | 374.12             | 833.59             | 2.102                          | 349.93             | 735.57             |
| A_68_P21080072 | chr2:26484180-26484224                            | NM_019833:226            | Fam69b        | INSIDE                 | 0.943                                                        | 3.436                          | 420.30             | 1444.14            | 3.242                          | 376.79             | 1221.38            |
| A_68_P20413379 | chr1:88566390-88566434                            | NM_010933:736            | Npcc          | INSIDE                 | 0.943                                                        | 0.441                          | 1850.76            | 816.18             | 0.416                          | 1373.40            | 571.23             |
| A_68_P31411662 | chr17:86008304-86008348                           | NR_038085:9410           | Six3os1       | INSIDE                 | 0.942                                                        | 0.616                          | 2638.72            | 1626.02            | 0.580                          | 2162.40            | 1254.61            |
| A_68_P31104790 | chr17:25707537-25707581                           | NM_011447:73             | Sox8          | INSIDE                 | 0.942                                                        | 0.491                          | 1499.43            | 735.49             | 0.462                          | 1154.09            | 533.12             |
| A_68_P29152215 | chr13:76080947-76080991                           | NM_028493:304            | Rhobtb3       | INSIDE                 | 0.942                                                        | 0.443                          | 1868.80            | 827.27             | 0.417                          | 1403.14            | 585.31             |
| A_68_P28060001 | chr11:98885291-98885335                           | NM_011623:191            | Top2a         | INSIDE                 | 0.942                                                        | 0.358                          | 1500.29            | 536.47             | 0.337                          | 1265.70            | 426.21             |
| A_68_P27926120 | chr11:75259006-75259050                           | NM_138950:9191           | Wdr81         | INSIDE                 | 0.942                                                        | 1.912                          | 1409.95            | 2695.33            | 1.801                          | 1100.05            | 1980.69            |
| A_68_P27921380 | chr11:74403245-74403289                           | NM_001015046:394         | Rap1gap2      | INSIDE                 | 0.942                                                        | 0.482                          | 2563.05            | 1235.66            | 0.454                          | 1833.42            | 832.90             |
| A_68_P27311154 | chr10:85391524-85391568                           | NM_001163614:311         | Ascl4         | INSIDE                 | 0.942                                                        | 3.526                          | 387.40             | 1365.98            | 3.321                          | 351.71             | 1167.99            |
| A_68_P26766608 | chr9:99770906-99770951                            | NM_011440:5661           | Sox14         | DOWNSTREAM             | 0.942                                                        | 2.478                          | 1035.12            | 2565.26            | 2.335                          | 857.08             | 2000.85            |
| A_68_P26168095 | chr8:113917768-113917812                          | NM_178086:-69            | Fa2h          | PROMOTER               | 0.942                                                        | 5.380                          | 1204.05            | 6477.26            | 5.067                          | 1207.41            | 6117.56            |
| A_68_P25458543 | chr7:125634738-125634782                          | NM_001033380:729         | Itprilp2      | INSIDE                 | 0.942                                                        | 0.433                          | 1496.27            | 647.88             | 0.408                          | 1136.66            | 463.84             |
| A_68_P25272111 | chr7:88599609-88599653                            | NM_007755:-68            | Cpeb1         | PROMOTER               | 0.942                                                        | 0.372                          | 3305.89            | 1230.18            | 0.351                          | 2233.85            | 783.09             |
| A_68_P22342538 | chr3:94965011-94965055                            | NM_011351:-3263          | Sema6c        | PROMOTER               | 0.942                                                        | 0.266                          | 1983.28            | 527.05             | 0.250                          | 1514.77            | 379.28             |
| A_68_P22101766 | chr3:45184223-45184267                            | NM_011043:1925           | Pcdh10        | INSIDE                 | 0.942                                                        | 2.118                          | 952.55             | 2017.49            | 1.996                          | 671.60             | 1340.49            |
| A_68_P32245742 | chrX:8777833-8777877                              | NM_173414:756            | Lanc13        | INSIDE                 | 0.941                                                        | 2.019                          | 514.50             | 1038.70            | 1.899                          | 634.71             | 1205.33            |
| A_68_P31951639 | chr19:10680032-10680076                           | NM_015735:-60            | Ddb1          | DIVERGENT_PROMOTER     | 0.941                                                        | 2.128                          | 1933.95            | 4115.43            | 2.002                          | 1584.39            | 3171.86            |
| A_68_P31213631 | chr17:47825034-47825078                           | NM_001164729:279         | Tomm6         | INSIDE                 | 0.941                                                        | 0.529                          | 864.74             | 457.25             | 0.498                          | 765.00             | 380.64             |
| A_68_P30423565 | chr15:88991328-88991372                           | NM_001159521:12930       | Plxn2         | INSIDE                 | 0.941                                                        | 2.517                          | 352.42             | 887.06             | 2.370                          | 330.09             | 782.18             |
| A_68_P28831282 | chr13:12350227-12350271                           | NM_001081128:19          | Mtr           | INSIDE                 | 0.941                                                        | 0.320                          | 2235.55            | 714.33             | 0.301                          | 1655.27            | 497.94             |
| A_68_P28071034 | chr11:100800458-100800502                         | NM_011486:345            | Stat3         | INSIDE                 | 0.941                                                        | 1.804                          | 1181.31            | 2131.30            | 1.698                          | 972.34             | 1651.34            |
| A_68_P27215085 | chr10:67442431-67442475                           | NM_001081346:107         | Rtkn2         | INSIDE                 | 0.941                                                        | 0.493                          | 1104.42            | 544.72             | 0.464                          | 896.31             | 416.13             |
| A_68_P26224616 | chr8:123641972-123642016                          | NM_013519:1924           | Foxc2         | INSIDE                 | 0.941                                                        | 0.383                          | 1861.33            | 712.43             | 0.360                          | 1376.04            | 495.48             |
| A_68_P26169911 | chr8:114255931-114255975                          | NM_001198839:84          | Bcar1         | INSIDE                 | 0.941                                                        | 0.604                          | 3411.16            | 2061.84            | 0.569                          | 2768.17            | 1574.77            |
[truncated: 5,843,595 more chars]
