# Supplementary material for: Effects of Prenatal Exposure to Titanium Dioxide Nanoparticles on DNA Methylation and Gene Expression Profile in the Mouse Brain
Source: PubMed Central journal article supplement (PMC8915839; doi:10.3389/ftox.2021.705910), 2021-10-08
Supplement: Table4.pdf [file Table4.pdf]

**Supplementary Table 4. The genes of which DNA methylation were increased in the brain of male offspring prenatally exposed to TiO<sub>2</sub>-NP.**

| ProbeName      | Target position of probe on CpG island microarray | TargetID           | GeneSymbol     | CpG island Description | Ratio of relative methylation (TiO <sub>2</sub> -NP/Vehicle) | Sham group                     |                    |                    | TiO <sub>2</sub> -H group      |                    |                    |
|----------------|---------------------------------------------------|--------------------|----------------|------------------------|--------------------------------------------------------------|--------------------------------|--------------------|--------------------|--------------------------------|--------------------|--------------------|
|                |                                                   |                    |                |                        |                                                              | Relative methylation (Cy5/Cy3) | Cy3 signal (Input) | Cy5 signal (MeDIP) | Relative methylation (Cy5/Cy3) | Cy3 signal (Input) | Cy5 signal (MeDIP) |
| A_68_P28202484 | chr12:4824078-4824122                             | NM_025323:-313     | 0610009D07Rik  | PROMOTER               | 1.732                                                        | 0.265                          | 2234.03            | 592.81             | 0.459                          | 1788.98            | 821.98             |
| A_68_P21641569 | chr2:132512720-132512764                          | NM_028637:-3276    | 1110034G24Rik  | PROMOTER               | 1.548                                                        | 0.350                          | 1952.87            | 683.47             | 0.542                          | 1693.38            | 917.50             |
| A_68_P30382917 | chr15:82176766-82176812                           | NM_026914:313      | 1500032L24Rik  | INSIDE                 | 2.098                                                        | 2.644                          | 631.38             | 1669.31            | 5.547                          | 551.68             | 3060.30            |
| A_68_P32683271 | chrX:133462182-133462226                          | NM_027067:341      | 1700014N06Rik  | INSIDE                 | 3.021                                                        | 2.158                          | 821.50             | 1772.67            | 6.518                          | 1230.09            | 8018.31            |
| A_68_P28607942 | chr12:87423668-87423712                           | NM_001199843:180   | 1700019E19Rik  | INSIDE                 | 1.577                                                        | 0.227                          | 2092.79            | 474.48             | 0.358                          | 1592.66            | 569.46             |
| A_68_P25933298 | chr8:69010075-69010123                            | NM_025465:308      | 1810029B16Rik  | INSIDE                 | 4.022                                                        | 1.912                          | 403.87             | 772.20             | 7.690                          | 290.64             | 2235.19            |
| A_68_P30568280 | chr16:16146642-16146686                           | NM_146068:262      | 2310008H04Rik  | INSIDE                 | 1.544                                                        | 2.496                          | 1629.22            | 4067.01            | 3.854                          | 1384.77            | 5337.16            |
| A_68_P30778641 | chr16:55974831-55974875                           | NR_027965:-122     | 2310061J03Rik  | PROMOTER               | 1.820                                                        | 2.660                          | 3051.78            | 8118.32            | 4.842                          | 2453.14            | 11878.15           |
| A_68_P27288895 | chr10:80788735-80788779                           | NM_027381:4909     | 2510012J08Rik  | INSIDE                 | 1.682                                                        | 1.954                          | 425.68             | 831.64             | 3.286                          | 321.71             | 1057.14            |
| A_68_P32070028 | chr19:32463753-32463797                           | NR_033198:69       | 2700046G09Rik  | INSIDE                 | 2.032                                                        | 0.300                          | 1668.43            | 500.16             | 0.609                          | 1234.31            | 751.89             |
| A_68_P32226223 | chr19:60656220-60656264                           | NM_001172096:684   | 2700078E11Rik  | INSIDE                 | 1.533                                                        | 0.220                          | 2860.62            | 630.53             | 0.338                          | 2091.20            | 706.46             |
| A_68_P28182974 | chr11:120050877-120050921                         | NR_030682:272      | 2810410E124Rik | INSIDE                 | 1.885                                                        | 5.036                          | 1021.71            | 5145.36            | 9.492                          | 783.76             | 7439.62            |
| A_68_P23996382 | chr5:113567569-113567615                          | NM_172884:24741    | 2900026A02Rik  | INSIDE                 | 1.838                                                        | 0.310                          | 2228.96            | 691.26             | 0.570                          | 1857.69            | 1058.77            |
| A_68_P26215962 | chr8:122292157-122292201                          | NM_028883:10138    | 4632415K11Rik  | INSIDE                 | 1.518                                                        | 1.472                          | 696.02             | 1024.85            | 2.236                          | 559.07             | 1249.89            |
| A_68_P21823609 | chr2:165221660-165221704                          | NM_029021:4212     | 4833422F24Rik  | INSIDE                 | 1.748                                                        | 2.230                          | 594.07             | 1324.93            | 3.899                          | 539.25             | 2102.65            |
| A_68_P30560720 | chr16:14159038-14159083                           | NM_001081154:307   | 4921513D23Rik  | INSIDE                 | 1.582                                                        | 0.244                          | 2275.29            | 554.47             | 0.386                          | 1666.31            | 642.52             |
| A_68_P25730016 | chr8:27096591-27096635                            | NM_029037:7981     | 4930444A02Rik  | INSIDE                 | 1.685                                                        | 1.666                          | 858.07             | 1429.54            | 2.808                          | 702.41             | 1727.07            |
| A_68_P22129414 | chr3:51200267-51200311                            | NM_026358:181      | 4930583H14Rik  | INSIDE                 | 2.500                                                        | 5.279                          | 1233.49            | 6511.29            | 13.198                         | 872.47             | 11514.77           |
| A_68_P27473560 | chr10:115551150-115551194                         | NM_001161855:-199  | 4933416C03Rik  | PROMOTER               | 2.153                                                        | 1.966                          | 708.88             | 1393.92            | 4.233                          | 540.85             | 2289.42            |
| A_68_P26065128 | chr8:94880726-94880770                            | NR_033641:-729     | 4933436C20Rik  | DIVERGENT_PROMOTER     | 1.553                                                        | 0.351                          | 2445.88            | 857.95             | 0.545                          | 1753.69            | 955.28             |
| A_68_P21754953 | chr2:153269988-153270032                          | NM_001001986:205   | 8430427H17Rik  | INSIDE                 | 1.627                                                        | 4.589                          | 2156.90            | 9898.03            | 7.466                          | 1736.38            | 12964.18           |
| A_68_P21782541 | chr2:158187217-158187261                          | NR_015463:7        | 9430008C03Rik  | INSIDE                 | 1.706                                                        | 0.236                          | 2003.52            | 473.16             | 0.403                          | 1240.63            | 499.96             |
| A_68_P21774735 | chr2:156846821-156846865                          | NM_001164663:58159 | 9830001H06Rik  | INSIDE                 | 1.642                                                        | 1.603                          | 495.12             | 793.91             | 2.633                          | 417.25             | 1098.49            |
| A_68_P21774854 | chr2:156865842-156865886                          | NM_001164663:39137 | 9830001H06Rik  | INSIDE                 | 1.533                                                        | 1.558                          | 521.91             | 812.91             | 2.388                          | 432.79             | 1033.39            |
| A_68_P26344263 | chr9:20672999-20673043                            | NM_175687:-65      | A230050P20Rik  | PROMOTER               | 1.636                                                        | 7.477                          | 836.66             | 6255.73            | 12.233                         | 690.61             | 8448.31            |
| A_68_P32775151 | chrX:155970887-155970931                          | NM_001033472:309   | A830080D01Rik  | INSIDE                 | 1.536                                                        | 0.258                          | 1739.12            | 449.18             | 0.397                          | 2453.34            | 973.31             |
| A_68_P24513205 | chr6:65622381-65622425                            | NM_172399:798      | A930038C07Rik  | INSIDE                 | 1.550                                                        | 0.118                          | 4061.98            | 481.18             | 0.184                          | 2778.12            | 510.25             |
| A_68_P28123544 | chr11:110198866-110198910                         | NM_147219:142      | Abca5          | INSIDE                 | 2.491                                                        | 3.885                          | 461.84             | 1794.05            | 9.675                          | 441.97             | 4276.21            |
| A_68_P32577124 | chrX:101609142-101609186                          | NM_009592:21       | Abcb7          | INSIDE                 | 2.883                                                        | 0.193                          | 1097.20            | 212.25             | 0.558                          | 1604.97            | 895.04             |
| A_68_P21741660 | chr2:150730004-150730048                          | NM_024465:441      | Abhd12         | INSIDE                 | 1.535                                                        | 0.142                          | 3194.54            | 454.68             | 0.218                          | 2540.11            | 554.83             |
| A_68_P31491179 | chr18:10706877-10706921                           | NM_134130:-204     | Abhd3          | PROMOTER               | 1.623                                                        | 0.207                          | 2949.55            | 611.31             | 0.336                          | 2040.67            | 686.49             |
| A_68_P26870880 | chr9:119071809-119071853                          | NM_146230:-5619    | Acaa1b         | PROMOTER               | 1.752                                                        | 2.371                          | 214.86             | 509.47             | 4.155                          | 234.49             | 974.38             |
| A_68_P27958481 | chr11:80966909-80966953                           | NM_007384:-525     | Accn1          | PROMOTER               | 1.504                                                        | 0.414                          | 1496.46            | 619.82             | 0.623                          | 1191.67            | 742.41             |
| A_68_P23417006 | chr4:151552589-151552633                          | NM_001146057:-7632 | Acot7          | PROMOTER               | 1.656                                                        | 0.299                          | 1702.59            | 509.26             | 0.495                          | 1356.58            | 671.96             |
| A_68_P27765617 | chr11:45869706-45869750                           | NM_009616:240      | Adam19         | INSIDE                 | 1.677                                                        | 0.172                          | 2823.73            | 486.49             | 0.289                          | 1961.13            | 566.57             |
| A_68_P26397640 | chr9:30729401-30729445                            | NM_001024139:615   | Adamts15       | INSIDE                 | 2.160                                                        | 1.424                          | 1059.29            | 1508.30            | 3.075                          | 891.62             | 2741.86            |
| A_68_P25276874 | chr7:89484048-89484092                            | NM_001190374:-133  | Adamts13       | PROMOTER               | 1.574                                                        | 18.961                         | 862.19             | 16348.22           | 29.848                         | 879.16             | 26241.57           |
| A_68_P30284264 | chr15:64753856-64753901                           | NM_009623:-20      | Adcy8          | PROMOTER               | 1.610                                                        | 0.349                          | 3013.77            | 1051.94            | 0.562                          | 2141.26            | 1203.36            |
| A_68_P31922425 | chr19:4305540-4305585                             | NM_130863:393      | Adrbk1         | INSIDE                 | 1.562                                                        | 0.418                          | 2712.76            | 1132.82            | 0.652                          | 2083.86            | 1359.66            |
| A_68_P23424871 | chr4:152806869-152806913                          | NM_001099299:50049 | Ajap1          | INSIDE                 | 1.931                                                        | 1.860                          | 657.91             | 1224.04            | 3.592                          | 471.45             | 1693.38            |
| A_68_P32717148 | chrX:140752921-140752965                          | NM_026247:434      | Alg13          | INSIDE                 | 5.797                                                        | 0.491                          | 4385.26            | 2155.07            | 2.849                          | 5164.89            | 14713.45           |
| A_68_P32710891 | chrX:139401598-139401642                          | NM_019496:-349     | Ammecr1        | PROMOTER               | 3.177                                                        | 3.070                          | 901.91             | 2768.52            | 9.753                          | 1089.13            | 10622.67           |
| A_68_P32710890 | chrX:139401516-139401560                          | NM_019496:-267     | Ammecr1        | PROMOTER               | 2.217                                                        | 2.823                          | 286.77             | 809.65             | 6.259                          | 396.02             | 2478.75            |

| ProbeName      | Target position of probe on CpG island microarray | TargetID            | GeneSymbol | CpG island Description | Ratio of relative methylation (TiO <sub>2</sub> -NP/Vehicle) | Sham group                     |                    |                    | TiO <sub>2</sub> -H group      |                    |                    |
|----------------|---------------------------------------------------|---------------------|------------|------------------------|--------------------------------------------------------------|--------------------------------|--------------------|--------------------|--------------------------------|--------------------|--------------------|
|                |                                                   |                     |            |                        |                                                              | Relative methylation (Cy5/Cy3) | Cy3 signal (Input) | Cy5 signal (MeDIP) | Relative methylation (Cy5/Cy3) | Cy3 signal (Input) | Cy5 signal (MeDIP) |
| A_68_P31599408 | chr18:31920327-31920372                           | NM_153515:816       | Ammecr11   | INSIDE                 | 3.933                                                        | 0.506                          | 964.60             | 487.95             | 1.990                          | 689.52             | 1371.92            |
| A_68_P32321494 | chrX:34588841-34588885                            | NM_173779:23        | Ankrd58    | INSIDE                 | 3.596                                                        | 0.508                          | 536.14             | 272.46             | 1.827                          | 800.77             | 1463.16            |
| A_68_P28741418 | chr12:112215432-112215476                         | NM_175207:1777      | Ankrd9     | INSIDE                 | 1.565                                                        | 2.047                          | 1357.37            | 2778.67            | 3.204                          | 1039.98            | 3331.74            |
| A_68_P28741417 | chr12:112215277-112215321                         | NM_175207:1933      | Ankrd9     | INSIDE                 | 1.813                                                        | 2.012                          | 421.16             | 847.49             | 3.649                          | 328.77             | 1199.66            |
| A_68_P30512950 | chr16:4964504-4964548                             | NM_028301:-196      | Anks3      | PROMOTER               | 1.541                                                        | 0.136                          | 3798.00            | 515.96             | 0.209                          | 2488.68            | 521.14             |
| A_68_P30459963 | chr15:95621546-95621590                           | NM_175344:295       | Ano6       | INSIDE                 | 1.584                                                        | 0.231                          | 2539.28            | 587.51             | 0.367                          | 1826.40            | 669.48             |
| A_68_P32538585 | chrX:91612495-91612539                            | NM_001199337:24     | Apoo       | INSIDE                 | 3.027                                                        | 0.188                          | 1992.20            | 374.32             | 0.569                          | 2559.37            | 1455.83            |
| A_68_P27835628 | chr11:59041341-59041385                           | NM_001130408:302    | Arf1       | INSIDE                 | 2.261                                                        | 2.342                          | 666.77             | 1561.72            | 5.295                          | 505.35             | 2675.83            |
| A_68_P32369309 | chrX:46847140-46847184                            | NM_001081123:23536  | Arhgap36   | INSIDE                 | 5.435                                                        | 0.128                          | 2155.34            | 275.35             | 0.694                          | 2870.86            | 1993.46            |
| A_68_P25677778 | chr8:14962588-14962634                            | NM_001037736:50894  | Arhgef10   | INSIDE                 | 1.558                                                        | 1.769                          | 895.76             | 1584.48            | 2.755                          | 660.31             | 1819.28            |
| A_68_P23358589 | chr4:140071100-140071144                          | NM_001112723:133549 | Arhgef10l  | INSIDE                 | 1.776                                                        | 1.709                          | 474.60             | 811.00             | 3.035                          | 406.30             | 1233.20            |
| A_68_P25614032 | chr8:3451969-3452013                              | NM_133962:58983     | Arhgef18   | INSIDE                 | 1.553                                                        | 2.272                          | 821.70             | 1866.53            | 3.528                          | 687.55             | 2425.37            |
| A_68_P22314993 | chr3:88447939-88447984                            | NM_001198912:22646  | Arhgef2    | INSIDE                 | 1.785                                                        | 1.673                          | 740.23             | 1238.66            | 2.987                          | 650.76             | 1944.13            |
| A_68_P30462697 | chr15:96118805-96118849                           | NM_175251:874       | Arid2      | INSIDE                 | 2.730                                                        | 0.661                          | 898.10             | 593.90             | 1.805                          | 600.20             | 1083.54            |
| A_68_P32678078 | chrX:132277552-132277596                          | NM_001009575:344    | Armex5     | INSIDE                 | 3.479                                                        | 0.513                          | 1635.75            | 839.37             | 1.785                          | 2346.21            | 4187.96            |
| A_68_P20789366 | chr1:166388627-166388671                          | NM_009721:-162      | Atp1b1     | PROMOTER               | 1.503                                                        | 0.401                          | 2682.17            | 1076.58            | 0.603                          | 2176.29            | 1312.79            |
| A_68_P24763306 | chr6:113991628-113991672                          | NM_009723:424       | Atp2b2     | INSIDE                 | 2.132                                                        | 0.074                          | 8276.90            | 609.06             | 0.157                          | 4814.09            | 755.17             |
| A_68_P32262594 | chrX:12164926-12164970                            | NM_027439:64        | Atp6ap2    | INSIDE                 | 4.317                                                        | 0.101                          | 1878.74            | 190.33             | 0.437                          | 2616.86            | 1144.46            |
| A_68_P32233091 | chrX:5660358-5660402                              | NM_001033211:158    | AU022751   | INSIDE                 | 1.908                                                        | 2.380                          | 272.91             | 649.47             | 4.540                          | 403.61             | 1832.32            |
| A_68_P24098211 | chr5:131915292-131915336                          | NM_177047:1102899   | Auts2      | INSIDE                 | 1.764                                                        | 1.814                          | 777.47             | 1410.48            | 3.201                          | 711.14             | 2276.02            |
| A_68_P25958415 | chr8:74225497-74225541                            | NM_028189:181       | B3gnt3     | INSIDE                 | 1.614                                                        | 0.242                          | 2052.69            | 497.30             | 0.391                          | 1379.50            | 539.29             |
| A_68_P26920733 | chr10:7500333-7500377                             | NM_145418:361       | BC013529   | INSIDE                 | 1.764                                                        | 0.232                          | 2535.06            | 586.93             | 0.408                          | 1864.52            | 761.54             |
| A_68_P25020989 | chr7:29076252-29076296                            | NM_175033:-121      | BC089491   | PROMOTER               | 1.647                                                        | 0.216                          | 2033.38            | 439.83             | 0.356                          | 1466.96            | 522.67             |
| A_68_P22384844 | chr3:102975721-102975767                          | NM_026602:111       | Beas2      | INSIDE                 | 1.891                                                        | 1.428                          | 987.01             | 1409.12            | 2.700                          | 677.36             | 1829.15            |
| A_68_P30480363 | chr15:99301136-99301180                           | NM_029236:4003      | Bedim3d    | INSIDE                 | 1.787                                                        | 1.554                          | 599.21             | 930.96             | 2.777                          | 461.69             | 1282.07            |
| A_68_P25508016 | chr7:135047821-135047865                          | NM_009739:256       | Beckdk     | INSIDE                 | 1.542                                                        | 0.364                          | 1335.83            | 485.95             | 0.561                          | 1061.10            | 595.23             |
| A_68_P27649722 | chr11:24064060-24064104                           | NM_001159290:83388  | Bcl11a     | INSIDE                 | 2.538                                                        | 2.525                          | 192.38             | 485.74             | 6.409                          | 134.34             | 861.06             |
| A_68_P28724521 | chr12:109154706-109154750                         | NM_001079883:86896  | Bcl11b     | INSIDE                 | 2.493                                                        | 2.102                          | 445.62             | 936.66             | 5.240                          | 395.98             | 2074.80            |
| A_68_P28724520 | chr12:109154600-109154644                         | NM_001079883:87002  | Bcl11b     | INSIDE                 | 1.617                                                        | 2.480                          | 1098.32            | 2724.25            | 4.012                          | 947.29             | 3800.08            |
| A_68_P28724516 | chr12:109154117-109154161                         | NM_001079883:87486  | Bcl11b     | INSIDE                 | 1.875                                                        | 1.461                          | 719.33             | 1050.81            | 2.740                          | 531.10             | 1455.00            |
| A_68_P32260575 | chrX:11705762-11705806                            | NM_001168321:31697  | Bcor       | INSIDE                 | 1.659                                                        | 0.268                          | 2609.74            | 699.09             | 0.445                          | 2866.64            | 1274.23            |
| A_68_P32260250 | chrX:11654399-11654443                            | NM_029510:3259      | Bcor       | INSIDE                 | 8.005                                                        | 0.077                          | 3083.96            | 237.31             | 0.616                          | 3350.61            | 2063.97            |
| A_68_P32364066 | chrX:45698978-45699030                            | NM_178782:4470      | Bcor1      | INSIDE                 | 17.870                                                       | 0.299                          | 906.62             | 271.43             | 5.350                          | 1281.69            | 6857.13            |
| A_68_P32364050 | chrX:45697107-45697151                            | NM_178782:2594      | Bcor1      | INSIDE                 | 2.310                                                        | 1.888                          | 8344.09            | 15754.93           | 4.361                          | 8516.29            | 37139.67           |
| A_68_P32364037 | chrX:45695522-45695566                            | NM_178782:1010      | Bcor1      | INSIDE                 | 1.612                                                        | 0.210                          | 2061.59            | 433.79             | 0.339                          | 2647.51            | 897.87             |
| A_68_P32364035 | chrX:45695205-45695249                            | NM_178782:692       | Bcor1      | INSIDE                 | 1.548                                                        | 3.670                          | 5012.89            | 18396.86           | 5.679                          | 6406.74            | 36386.35           |
| A_68_P32364052 | chrX:45697351-45697395                            | NM_178782:2838      | Bcor1      | INSIDE                 | 9.266                                                        | 0.194                          | 506.06             | 98.31              | 1.800                          | 745.77             | 1342.50            |
| A_68_P28731504 | chr12:110272212-110272256                         | NM_001163175:34193  | Begain     | INSIDE                 | 1.571                                                        | 2.918                          | 478.65             | 1396.53            | 4.583                          | 373.70             | 1712.51            |
| A_68_P28731503 | chr12:110272067-110272111                         | NM_001163175:34339  | Begain     | INSIDE                 | 1.519                                                        | 2.353                          | 722.34             | 1699.64            | 3.574                          | 578.02             | 2065.63            |
| A_68_P27100735 | chr10:43231159-43231203                           | NM_199028:32235     | Bend3      | INSIDE                 | 1.882                                                        | 2.038                          | 861.53             | 1755.85            | 3.836                          | 612.04             | 2347.96            |
| A_68_P27100736 | chr10:43231246-43231290                           | NM_199028:32323     | Bend3      | INSIDE                 | 1.705                                                        | 1.921                          | 799.67             | 1535.84            | 3.275                          | 751.16             | 2460.31            |
| A_68_P21906146 | chr2:180511719-180511763                          | NM_080641:-135      | Bhlhe23    | PROMOTER               | 1.618                                                        | 0.381                          | 1734.71            | 661.43             | 0.617                          | 1407.63            | 868.39             |
| A_68_P27233861 | chr10:70622146-70622190                           | NM_031397:214       | Bicc1      | INSIDE                 | 2.843                                                        | 0.620                          | 1556.32            | 965.12             | 1.763                          | 1183.74            | 2087.16            |
| A_68_P29024947 | chr13:49478476-49478520                           | NM_001039179:41581  | Bicd2      | INSIDE                 | 1.671                                                        | 2.133                          | 233.03             | 496.98             | 3.564                          | 197.56             | 704.06             |
| A_68_P28959944 | chr13:38437327-38437371                           | NM_007556:-236      | Bmp6       | PROMOTER               | 1.959                                                        | 0.216                          | 2341.21            | 506.63             | 0.424                          | 1669.47            | 707.81             |

| ProbeName      | Target position of probe on CpG island microarray | TargetID           | GeneSymbol    | CpG island Description | Ratio of relative methylation (TiO <sub>2</sub> -NP/Vehicle) | Sham group                     |                    |                    | TiO <sub>2</sub> -H group      |                    |                    |
|----------------|---------------------------------------------------|--------------------|---------------|------------------------|--------------------------------------------------------------|--------------------------------|--------------------|--------------------|--------------------------------|--------------------|--------------------|
|                |                                                   |                    |               |                        |                                                              | Relative methylation (Cy5/Cy3) | Cy3 signal (Input) | Cy5 signal (MeDIP) | Relative methylation (Cy5/Cy3) | Cy3 signal (Input) | Cy5 signal (MeDIP) |
| A_68_P31152226 | chr17:34257950-34257994                           | NR_037970:-1127    | Brd2          | PROMOTER               | 1.652                                                        | 0.313                          | 3155.24            | 987.92             | 0.517                          | 2093.02            | 1082.94            |
| A_68_P23296719 | chr4:129138535-129138579                          | NM_133889:-366     | Bsdc1         | PROMOTER               | 1.777                                                        | 2.524                          | 257.67             | 650.34             | 4.485                          | 232.11             | 1041.10            |
| A_68_P26813047 | chr9:108008622-108008666                          | NM_007567:84070    | Bsn           | INSIDE                 | 1.882                                                        | 2.202                          | 813.15             | 1790.15            | 4.142                          | 688.49             | 2851.86            |
| A_68_P21673353 | chr2:138082625-138082669                          | NM_001025431:327   | Btb3          | INSIDE                 | 1.644                                                        | 0.264                          | 2671.76            | 705.92             | 0.434                          | 2204.93            | 957.51             |
| A_68_P32137924 | chr19:45438347-45438391                           | NM_001037758:145   | Btrc          | INSIDE                 | 1.821                                                        | 0.240                          | 3569.15            | 855.22             | 0.436                          | 2453.40            | 1070.74            |
| A_68_P31001860 | chr16:98144127-98144171                           | NM_174847:95       | C2cd2         | INSIDE                 | 1.669                                                        | 0.354                          | 1662.37            | 589.29             | 0.592                          | 1271.53            | 752.40             |
| A_68_P23818508 | chr5:77287446-77287490                            | NM_001163793:17845 | C530008M17Rik | INSIDE                 | 1.671                                                        | 1.383                          | 979.12             | 1353.77            | 2.311                          | 680.53             | 1572.60            |
| A_68_P24818072 | chr6:124946958-124947002                          | NM_001145927:-1474 | C530028O21Rik | PROMOTER               | 1.509                                                        | 0.142                          | 6089.60            | 866.83             | 0.215                          | 4238.32            | 910.63             |
| A_68_P32576278 | chrX:101395079-101395123                          | NM_001077354:1356  | C77370        | INSIDE                 | 5.811                                                        | 0.451                          | 392.85             | 177.07             | 2.619                          | 482.00             | 1262.41            |
| A_68_P30371309 | chr15:80118848-80118907                           | NM_001044308:1210  | Cacna1i       | INSIDE                 | 2.024                                                        | 2.193                          | 492.37             | 1079.74            | 4.440                          | 239.54             | 1063.46            |
| A_68_P25961388 | chr8:74967563-74967607                            | NM_029782:-8529    | Calr3         | PROMOTER               | 1.519                                                        | 0.381                          | 1833.69            | 698.67             | 0.579                          | 1318.55            | 762.96             |
| A_68_P20975268 | chr2:5635854-5635898                              | NM_177343:-166     | Camk1d        | PROMOTER               | 1.910                                                        | 1.570                          | 441.71             | 693.26             | 2.998                          | 365.20             | 1094.94            |
| A_68_P25354352 | chr7:105326428-105326472                          | NM_007602:253      | Capn5         | INSIDE                 | 1.958                                                        | 0.284                          | 2352.49            | 668.53             | 0.556                          | 1727.60            | 961.11             |
| A_68_P21485631 | chr2:103637120-103637164                          | NM_00111289:93     | Caprin1       | INSIDE                 | 1.502                                                        | 0.376                          | 1745.83            | 655.96             | 0.565                          | 1212.22            | 684.33             |
| A_68_P30533731 | chr16:8672077-8672121                             | NM_025821:148      | Carhsp1       | INSIDE                 | 1.672                                                        | 0.146                          | 3146.51            | 460.63             | 0.245                          | 2201.25            | 538.75             |
| A_68_P23396583 | chr4:148179764-148179808                          | NM_027195:1286     | Cas21         | INSIDE                 | 1.713                                                        | 0.271                          | 2501.03            | 678.08             | 0.464                          | 1694.65            | 786.98             |
| A_68_P23396589 | chr4:148180346-148180401                          | NM_027195:1873     | Cas21         | INSIDE                 | 2.563                                                        | 2.263                          | 157.20             | 355.69             | 5.798                          | 158.00             | 916.16             |
| A_68_P23321453 | chr4:133742651-133742697                          | NM_144527:326      | Ccdc21        | INSIDE                 | 1.880                                                        | 0.057                          | 10640.00           | 604.37             | 0.107                          | 7099.09            | 758.19             |
| A_68_P23245374 | chr4:119088045-119088089                          | NM_029286:60       | Ccdc30        | INSIDE                 | 1.971                                                        | 0.321                          | 1956.19            | 627.93             | 0.633                          | 1382.91            | 875.07             |
| A_68_P26467525 | chr9:44225880-44225924                            | NM_201372:188      | Ccdc84        | INSIDE                 | 1.525                                                        | 0.332                          | 3304.29            | 1097.27            | 0.506                          | 2174.23            | 1101.07            |
| A_68_P26467526 | chr9:44226004-44226048                            | NM_201372:64       | Ccdc84        | INSIDE                 | 1.649                                                        | 0.388                          | 1972.34            | 765.18             | 0.640                          | 1325.77            | 848.27             |
| A_68_P21576978 | chr2:120557105-120557149                          | NM_026891:127      | Cdan1         | INSIDE                 | 1.570                                                        | 0.285                          | 3303.82            | 940.94             | 0.447                          | 2692.91            | 1204.22            |
| A_68_P22449311 | chr3:116126122-116126166                          | NM_001080818:806   | Cdc14a        | INSIDE                 | 1.691                                                        | 0.245                          | 1918.75            | 469.38             | 0.414                          | 1518.17            | 628.04             |
| A_68_P21325833 | chr2:72314668-72314712                            | NM_025866:415      | Cdca7         | INSIDE                 | 1.551                                                        | 0.290                          | 1575.87            | 457.67             | 0.451                          | 1228.83            | 553.63             |
| A_68_P26236516 | chr8:125394674-125394718                          | NM_007662:22423    | Cdh15         | DOWNSTREAM             | 1.590                                                        | 2.976                          | 1299.16            | 3866.90            | 4.732                          | 1076.60            | 5094.76            |
| A_68_P29613441 | chr14:55260479-55260523                           | NM_199470:-299     | Cdh24         | PROMOTER               | 1.539                                                        | 0.216                          | 3125.93            | 676.17             | 0.333                          | 2189.69            | 729.00             |
| A_68_P30025417 | chr15:12980979-12981031                           | NM_007666:122390   | Cdh6          | INSIDE                 | 1.763                                                        | 1.647                          | 512.34             | 843.97             | 2.904                          | 383.52             | 1113.55            |
| A_68_P31125955 | chr17:29235539-29235583                           | NM_007669:4844     | Cdkn1a        | INSIDE                 | 1.531                                                        | 1.882                          | 670.31             | 1261.45            | 2.880                          | 550.86             | 1586.62            |
| A_68_P30778319 | chr16:55905763-55905807                           | NM_028815:29177    | Cep97         | INSIDE                 | 1.598                                                        | 1.563                          | 990.59             | 1548.31            | 2.498                          | 782.50             | 1954.51            |
| A_68_P22402364 | chr3:106350168-106350212                          | NM_133869:489      | Cept1         | INSIDE                 | 1.572                                                        | 0.222                          | 2445.83            | 542.46             | 0.349                          | 1738.70            | 606.10             |
| A_68_P24631555 | chr6:90259775-90259819                            | NM_027928:15383    | Chst13        | INSIDE                 | 1.596                                                        | 1.739                          | 623.35             | 1084.11            | 2.775                          | 545.54             | 1513.97            |
| A_68_P24631552 | chr6:90259348-90259392                            | NM_027928:15809    | Chst13        | INSIDE                 | 2.462                                                        | 1.710                          | 452.86             | 774.52             | 4.211                          | 374.31             | 1576.36            |
| A_68_P32130472 | chr19:44181487-44181534                           | NM_001162410:457   | Chuk          | INSIDE                 | 1.825                                                        | 0.327                          | 5135.69            | 1677.71            | 0.596                          | 3118.05            | 1858.58            |
| A_68_P32567810 | chrX:99447558-99447602                            | NM_007709:-472     | Cited1        | PROMOTER               | 3.080                                                        | 0.207                          | 1239.88            | 256.43             | 0.637                          | 1780.68            | 1134.14            |
| A_68_P22413865 | chr3:108456942-108456986                          | NM_001177770:57    | Clec1         | INSIDE                 | 1.864                                                        | 0.241                          | 2252.56            | 543.78             | 0.450                          | 1605.12            | 722.39             |
| A_68_P23609440 | chr5:37139337-37139381                            | NM_133724:560      | Cno           | INSIDE                 | 1.529                                                        | 0.242                          | 2046.23            | 495.77             | 0.371                          | 1537.15            | 569.55             |
| A_68_P24946537 | chr7:3596654-3596698                              | NM_146176:-194     | Cnot3         | PROMOTER               | 1.534                                                        | 0.208                          | 3351.90            | 698.25             | 0.319                          | 2377.64            | 759.59             |
| A_68_P24359960 | chr6:35084098-35084143                            | NM_001164412:-383  | Cnot4         | PROMOTER               | 1.520                                                        | 2.253                          | 427.91             | 963.94             | 3.423                          | 256.87             | 879.31             |
| A_68_P22893528 | chr4:47258456-47258500                            | NM_009928:37595    | Col15a1       | INSIDE                 | 1.522                                                        | 1.663                          | 468.23             | 778.66             | 2.531                          | 379.79             | 961.29             |
| A_68_P21629541 | chr2:130223202-130223246                          | NM_019696:141      | Cpxm1         | INSIDE                 | 1.601                                                        | 0.280                          | 2046.86            | 573.02             | 0.448                          | 1504.46            | 674.27             |
| A_68_P31157716 | chr17:35258201-35258245                           | NM_009975:170      | Csnk2b        | INSIDE                 | 1.985                                                        | 0.153                          | 3762.87            | 576.81             | 0.304                          | 2574.40            | 783.50             |
| A_68_P26875426 | chr9:119883221-119883265                          | NM_153287:10534    | Csrp1         | INSIDE                 | 1.720                                                        | 2.451                          | 1093.10            | 2679.13            | 4.217                          | 802.54             | 3384.01            |
| A_68_P25539016 | chr7:140315036-140315089                          | NM_009980:104      | Ctbp2         | INSIDE                 | 2.003                                                        | 2.608                          | 6932.15            | 18081.65           | 5.225                          | 4442.76            | 23212.76           |
| A_68_P26880499 | chr9:120842203-120842247                          | NM_007614:-293     | Ctnnb1        | PROMOTER               | 1.542                                                        | 3.009                          | 2567.49            | 7725.82            | 4.640                          | 1727.24            | 8014.87            |
| A_68_P25416834 | chr7:118199064-118199108                          | NM_009431:26622    | Ctrl9         | INSIDE                 | 1.755                                                        | 1.489                          | 700.82             | 1043.42            | 2.613                          | 551.07             | 1439.80            |

| ProbeName      | Target position of probe on CpG island microarray | TargetID           | GeneSymbol    | CpG island Description | Ratio of relative methylation (TiO <sub>2</sub> -NP/Vehicle) | Sham group                     |                    |                    | TiO <sub>2</sub> -H group      |                    |                    |
|----------------|---------------------------------------------------|--------------------|---------------|------------------------|--------------------------------------------------------------|--------------------------------|--------------------|--------------------|--------------------------------|--------------------|--------------------|
|                |                                                   |                    |               |                        |                                                              | Relative methylation (Cy5/Cy3) | Cy3 signal (Input) | Cy5 signal (MeDIP) | Relative methylation (Cy5/Cy3) | Cy3 signal (Input) | Cy5 signal (MeDIP) |
| A_68_P25083573 | chr7:50930678-50930722                            | NM_145582:3300     | Ctu1          | INSIDE                 | 1.878                                                        | 1.646                          | 1003.66            | 1652.20            | 3.092                          | 792.73             | 2451.30            |
| A_68_P32328377 | chrX:35918417-35918470                            | NM_001110142:10930 | Cul4b         | INSIDE                 | 17.143                                                       | 0.162                          | 532.97             | 86.41              | 2.779                          | 814.00             | 2262.38            |
| A_68_P24120341 | chr5:136751221-136751265                          | NM_198602:292033   | Cux1          | INSIDE                 | 1.594                                                        | 2.390                          | 540.71             | 1292.55            | 3.811                          | 381.48             | 1453.75            |
| A_68_P24120337 | chr5:136750787-136750831                          | NM_198602:292467   | Cux1          | INSIDE                 | 1.580                                                        | 2.240                          | 334.43             | 749.01             | 3.538                          | 319.82             | 1131.52            |
| A_68_P27913317 | chr11:72609127-72609171                           | NM_001024926:193   | Cyb5d2        | INSIDE                 | 1.695                                                        | 0.215                          | 2830.15            | 607.14             | 0.364                          | 2067.92            | 751.72             |
| A_68_P29874397 | chr14:105339298-105339349                         | NR_015593:300960   | D130009118Rik | INSIDE                 | 1.924                                                        | 1.521                          | 567.06             | 862.71             | 2.927                          | 459.99             | 1346.31            |
| A_68_P32145200 | chr19:46728723-46728767                           | NM_001177813:30854 | D19Wsu162e    | INSIDE                 | 1.514                                                        | 1.640                          | 976.15             | 1600.61            | 2.483                          | 751.59             | 1866.24            |
| A_68_P20910361 | chr1:188791550-188791594                          | NM_033077:278      | D1Pas1        | INSIDE                 | 1.682                                                        | 2.248                          | 960.00             | 2158.23            | 3.782                          | 797.59             | 3016.45            |
| A_68_P20910363 | chr1:188791777-188791821                          | NM_033077:504      | D1Pas1        | INSIDE                 | 1.814                                                        | 1.467                          | 667.22             | 978.63             | 2.661                          | 604.52             | 1608.39            |
| A_68_P23325564 | chr4:134480330-134480374                          | NM_023665:813      | D4Wsu53e      | INSIDE                 | 1.584                                                        | 0.244                          | 3057.39            | 744.91             | 0.386                          | 1836.84            | 708.77             |
| A_68_P28525539 | chr12:72419195-72419245                           | NM_001190466:8350  | Dact1         | INSIDE                 | 1.767                                                        | 2.627                          | 467.90             | 1229.28            | 4.641                          | 368.31             | 1709.50            |
| A_68_P31150930 | chr17:34048600-34048644                           | NM_001199733:2077  | Daxx          | INSIDE                 | 1.763                                                        | 1.564                          | 487.56             | 762.60             | 2.758                          | 369.37             | 1018.60            |
| A_68_P31227869 | chr17:50432800-50432844                           | NM_010021:102      | Dazl          | INSIDE                 | 2.150                                                        | 1.933                          | 738.63             | 1427.62            | 4.155                          | 602.36             | 2502.83            |
| A_68_P20560374 | chr1:122017670-122017714                          | NM_007830:-19      | Dbi           | DIVERGENT_PROMOTER     | 1.526                                                        | 0.212                          | 2689.91            | 570.67             | 0.324                          | 2156.88            | 698.14             |
| A_68_P25094601 | chr7:52962152-52962196                            | NM_016974:1558     | Dbp           | INSIDE                 | 2.345                                                        | 0.208                          | 2271.06            | 472.85             | 0.488                          | 1663.32            | 812.26             |
| A_68_P25394427 | chr7:112936384-112936433                          | NM_001162943:-344  | Dchs1         | PROMOTER               | 3.028                                                        | 1.604                          | 528.58             | 847.78             | 4.857                          | 345.57             | 1678.51            |
| A_68_P32395899 | chrX:53708448-53708501                            | NM_172779:459      | Ddx26b        | INSIDE                 | 11.436                                                       | 0.200                          | 465.56             | 93.05              | 2.286                          | 596.72             | 1363.81            |
| A_68_P23981088 | chr5:111082625-111082669                          | NM_027156:177      | Ddx51         | INSIDE                 | 1.574                                                        | 0.330                          | 2106.83            | 696.10             | 0.520                          | 1562.17            | 812.51             |
| A_68_P25093408 | chr7:52744206-52744250                            | NM_027903:-62      | Dhdh          | PROMOTER               | 1.554                                                        | 0.316                          | 2097.87            | 662.37             | 0.491                          | 1541.75            | 756.48             |
| A_68_P30672035 | chr16:35769023-35769067                           | NM_153550:398      | Dirc2         | INSIDE                 | 1.823                                                        | 0.244                          | 2104.43            | 513.87             | 0.445                          | 1598.90            | 711.60             |
| A_68_P33015620 | chr1_random:50449-50497                           | NM_026866:134866   | Disp1         | INSIDE                 | 2.133                                                        | 1.701                          | 352.30             | 599.12             | 3.628                          | 263.73             | 956.84             |
| A_68_P33015621 | chr1_random:50610-50662                           | NM_026866:134702   | Disp1         | INSIDE                 | 2.087                                                        | 1.420                          | 808.65             | 1148.55            | 2.964                          | 567.90             | 1683.36            |
| A_68_P25422971 | chr7:119301817-119301861                          | NM_015814:733      | Dkk3          | INSIDE                 | 2.190                                                        | 3.136                          | 3496.34            | 10964.25           | 6.869                          | 2815.34            | 19338.78           |
| A_68_P26504859 | chr9:50467279-50467323                            | NM_145614:585      | Dlat          | INSIDE                 | 2.072                                                        | 0.210                          | 2240.02            | 470.46             | 0.435                          | 1713.12            | 745.43             |
| A_68_P29651209 | chr14:62267312-62267356                           | NR_028264:33876    | Dleu2         | INSIDE                 | 1.668                                                        | 0.215                          | 2631.81            | 566.47             | 0.359                          | 1978.19            | 710.00             |
| A_68_P25021026 | chr7:29083763-29083810                            | NM_007866:3018     | Dll3          | INSIDE                 | 1.812                                                        | 3.280                          | 272.38             | 893.50             | 5.944                          | 265.45             | 1577.90            |
| A_68_P21569149 | chr2:119163546-119163590                          | NM_019454:12049    | Dll4          | DOWNSTREAM             | 2.340                                                        | 2.253                          | 1574.09            | 3547.00            | 5.274                          | 1325.48            | 6990.45            |
| A_68_P23192163 | chr4:107356485-107356529                          | NM_019872:261      | Dmrtb1        | INSIDE                 | 1.685                                                        | 2.808                          | 415.51             | 1166.68            | 4.732                          | 366.10             | 1732.21            |
| A_68_P27928205 | chr11:75608766-75608811                           | NM_007873:771      | Doc2b         | INSIDE                 | 1.696                                                        | 0.319                          | 1994.14            | 635.34             | 0.540                          | 1600.45            | 865.04             |
| A_68_P25026465 | chr7:30089302-30089346                            | NM_013874:301      | Dpfl          | INSIDE                 | 1.713                                                        | 0.358                          | 1868.51            | 669.59             | 0.614                          | 1280.73            | 786.10             |
| A_68_P25587962 | chr7:148480819-148480877                          | NM_007878:2944     | Drd4          | INSIDE                 | 1.726                                                        | 1.860                          | 348.96             | 648.99             | 3.211                          | 289.29             | 928.85             |
| A_68_P30981935 | chr16:94748214-94748258                           | NM_007834:0        | Dscr3         | INSIDE                 | 2.783                                                        | 0.671                          | 1402.73            | 940.97             | 1.867                          | 1033.99            | 1930.43            |
| A_68_P21585602 | chr2:122127398-122127442                          | NM_025777:2785     | Duoxa2        | INSIDE                 | 1.563                                                        | 0.114                          | 4204.83            | 479.12             | 0.178                          | 2958.28            | 526.81             |
| A_68_P21585603 | chr2:122127484-122127528                          | NM_025777:2871     | Duoxa2        | INSIDE                 | 1.603                                                        | 0.421                          | 2088.59            | 879.01             | 0.675                          | 1524.50            | 1028.42            |
| A_68_P24863577 | chr6:134742556-134742600                          | NM_001048054:68    | Dusp16        | INSIDE                 | 1.567                                                        | 0.223                          | 2441.07            | 544.37             | 0.350                          | 1732.81            | 605.64             |
| A_68_P24596644 | chr6:83958657-83958701                            | NM_001077694:95    | Dysf          | INSIDE                 | 2.356                                                        | 2.367                          | 269.48             | 637.86             | 5.577                          | 182.83             | 1019.63            |
| A_68_P31252967 | chr17:56095790-56095834                           | NM_015766:3767     | Ebi3          | INSIDE                 | 1.598                                                        | 1.688                          | 665.34             | 1122.94            | 2.697                          | 484.33             | 1306.29            |
| A_68_P23342965 | chr4:137513918-137513962                          | NM_199307:95789    | Ece1          | INSIDE                 | 2.003                                                        | 2.220                          | 214.85             | 477.07             | 4.447                          | 141.05             | 627.21             |
| A_68_P20416033 | chr1:89051506-89051553                            | NM_021306:73       | Ece1          | INSIDE                 | 4.247                                                        | 0.146                          | 1120.48            | 163.91             | 0.621                          | 1467.78            | 911.93             |
| A_68_P21908932 | chr2:180891704-180891748                          | NM_007906:-6       | Eef1a2        | PROMOTER               | 1.836                                                        | 0.204                          | 2968.38            | 604.30             | 0.374                          | 2100.95            | 785.23             |
| A_68_P23366443 | chr4:141430949-141430993                          | NM_025994:-135     | Efh2          | PROMOTER               | 1.559                                                        | 2.287                          | 630.10             | 1441.25            | 3.566                          | 498.78             | 1778.50            |
| A_68_P32553704 | chrX:96332183-96332227                            | NM_010110:736      | Efnb1         | INSIDE                 | 10.685                                                       | 0.064                          | 1361.04            | 87.02              | 0.683                          | 2035.53            | 1390.49            |
| A_68_P27212434 | chr10:66999516-66999563                           | NM_010118:-1077    | Egr2          | PROMOTER               | 2.674                                                        | 0.241                          | 3139.30            | 755.22             | 0.643                          | 2120.74            | 1364.36            |
| A_68_P29699020 | chr14:70477756-70477800                           | NM_018781:527      | Egr3          | INSIDE                 | 1.651                                                        | 0.223                          | 2097.74            | 468.42             | 0.369                          | 1575.88            | 581.14             |
| A_68_P23280027 | chr4:126106647-126106691                          | NM_153402:118      | Eif2c3        | INSIDE                 | 1.637                                                        | 0.374                          | 1530.92            | 573.05             | 0.613                          | 1160.71            | 711.12             |

| ProbeName      | Target position of probe on CpG island microarray | TargetID            | GeneSymbol | CpG island Description | Ratio of relative methylation (TiO <sub>2</sub> -NP/Vehicle) | Sham group                     |                    |                    | TiO <sub>2</sub> -H group      |                    |                    |
|----------------|---------------------------------------------------|---------------------|------------|------------------------|--------------------------------------------------------------|--------------------------------|--------------------|--------------------|--------------------------------|--------------------|--------------------|
|                |                                                   |                     |            |                        |                                                              | Relative methylation (Cy5/Cy3) | Cy3 signal (Input) | Cy5 signal (MeDIP) | Relative methylation (Cy5/Cy3) | Cy3 signal (Input) | Cy5 signal (MeDIP) |
| A_68_P32364768 | chrX:45807315-45807359                            | NM_019680:8973      | Elf4       | INSIDE                 | 8.200                                                        | 0.167                          | 1849.80            | 308.14             | 1.366                          | 2377.43            | 3247.39            |
| A_68_P32364760 | chrX:45806092-45806136                            | NM_019680:10195     | Elf4       | INSIDE                 | 3.044                                                        | 0.558                          | 559.37             | 312.10             | 1.698                          | 753.01             | 1278.76            |
| A_68_P25952523 | chr8:73063414-73063459                            | NM_007924:-137      | Eil1       | PROMOTER               | 1.683                                                        | 0.270                          | 1813.60            | 490.19             | 0.455                          | 1275.50            | 580.29             |
| A_68_P20884270 | chr1:183853884-183853931                          | NM_001083120:96204  | Enah       | INSIDE                 | 2.593                                                        | 3.063                          | 166.71             | 510.59             | 7.942                          | 178.16             | 1414.96            |
| A_68_P31418978 | chr17:87152455-87152501                           | NM_010137:-725      | Epas1      | PROMOTER               | 1.663                                                        | 0.353                          | 2221.64            | 784.05             | 0.587                          | 1898.75            | 1114.31            |
| A_68_P31424359 | chr17:88039798-88039842                           | NM_008532:4502      | Epcam      | INSIDE                 | 1.729                                                        | 1.980                          | 800.19             | 1584.07            | 3.422                          | 598.90             | 2049.64            |
| A_68_P23363267 | chr4:140864773-140864817                          | NM_010139:7640      | Epha2      | INSIDE                 | 2.088                                                        | 1.537                          | 1059.68            | 1629.05            | 3.210                          | 785.18             | 2520.79            |
| A_68_P28575795 | chr12:81564283-81564327                           | NM_133798:223       | Exd2       | INSIDE                 | 1.675                                                        | 2.365                          | 4896.40            | 11578.73           | 3.960                          | 3661.54            | 14500.29           |
| A_68_P29241525 | chr13:96374455-96374499                           | NM_010169:13912     | F2r        | INSIDE                 | 1.519                                                        | 2.412                          | 310.99             | 750.01             | 3.664                          | 265.74             | 973.81             |
| A_68_P29241524 | chr13:96374376-96374423                           | NM_010169:13989     | F2r        | INSIDE                 | 1.575                                                        | 1.802                          | 361.54             | 651.63             | 2.839                          | 278.87             | 791.75             |
| A_68_P23227295 | chr4:115690207-115690251                          | NM_010173:279       | Faah       | INSIDE                 | 1.722                                                        | 0.350                          | 2630.89            | 920.09             | 0.602                          | 2040.46            | 1228.88            |
| A_68_P22415887 | chr3:108830521-108830565                          | NM_001163567:-17    | Fam102b    | PROMOTER               | 1.852                                                        | 20.640                         | 400.36             | 8263.26            | 38.234                         | 341.40             | 13053.19           |
| A_68_P27284174 | chr10:80049350-80049394                           | NM_145421:3714      | Fam108a    | INSIDE                 | 2.079                                                        | 1.607                          | 515.22             | 827.96             | 3.340                          | 442.41             | 1477.84            |
| A_68_P24046894 | chr5:122303239-122303283                          | NM_175474:4224      | Fam109a    | INSIDE                 | 1.789                                                        | 1.939                          | 269.97             | 523.60             | 3.470                          | 184.59             | 640.48             |
| A_68_P29644189 | chr14:60997251-60997301                           | NM_001164705:154    | Fam123a    | INSIDE                 | 1.541                                                        | 1.684                          | 536.98             | 904.21             | 2.595                          | 444.10             | 1152.31            |
| A_68_P25957394 | chr8:74067191-74067235                            | NM_028617:384       | Fam125a    | INSIDE                 | 1.758                                                        | 0.273                          | 3039.25            | 828.37             | 0.479                          | 1670.19            | 800.38             |
| A_68_P25641011 | chr8:9207733-9207777                              | NM_173446:563269    | Fam155a    | INSIDE                 | 1.545                                                        | 2.130                          | 368.77             | 785.31             | 3.289                          | 363.86             | 1196.84            |
| A_68_P23195766 | chr4:108055710-108055754                          | NM_001099303:222    | Fam159a    | INSIDE                 | 1.714                                                        | 3.555                          | 592.30             | 2105.86            | 6.094                          | 439.28             | 2676.84            |
| A_68_P20741943 | chr1:158134761-158134805                          | NM_177838:374       | Fam163a    | INSIDE                 | 1.693                                                        | 0.263                          | 2869.64            | 754.65             | 0.445                          | 1812.02            | 806.75             |
| A_68_P23317853 | chr4:133042110-133042154                          | NM_175307:6085      | Fam46b     | INSIDE                 | 1.562                                                        | 1.674                          | 434.02             | 726.59             | 2.615                          | 367.20             | 960.25             |
| A_68_P23317854 | chr4:133042232-133042276                          | NM_175307:6207      | Fam46b     | INSIDE                 | 1.698                                                        | 1.413                          | 1009.88            | 1427.21            | 2.400                          | 720.35             | 1728.53            |
| A_68_P28940414 | chr13:34838852-34838896                           | NM_138746:7364      | Fam50b     | INSIDE                 | 1.742                                                        | 1.574                          | 689.16             | 1084.99            | 2.743                          | 604.58             | 1658.24            |
| A_68_P25827954 | chr8:46109471-46109515                            | NM_001081286:73931  | Fat1       | INSIDE                 | 1.601                                                        | 2.260                          | 335.56             | 758.44             | 3.619                          | 296.17             | 1071.77            |
| A_68_P25827948 | chr8:46108836-46108887                            | NM_001081286:73300  | Fat1       | INSIDE                 | 1.725                                                        | 1.680                          | 466.67             | 784.00             | 2.899                          | 425.62             | 1233.75            |
| A_68_P25827947 | chr8:46108650-46108696                            | NM_001081286:73111  | Fat1       | INSIDE                 | 1.510                                                        | 1.742                          | 344.66             | 600.52             | 2.630                          | 309.34             | 813.66             |
| A_68_P22071595 | chr3:38784639-38784683                            | NM_183221:-1201     | Fat4       | PROMOTER               | 1.722                                                        | 0.178                          | 2961.97            | 526.82             | 0.306                          | 2064.19            | 632.37             |
| A_68_P26227387 | chr8:124078337-124078381                          | NM_133765:24348     | Fbxo31     | INSIDE                 | 1.904                                                        | 1.515                          | 1027.42            | 1556.91            | 2.886                          | 530.05             | 1529.47            |
| A_68_P27311664 | chr10:85484474-85484519                           | NM_153195:-177      | Fbxo7      | DIVERGENT_PROMOTER     | 4.235                                                        | 0.674                          | 2000.06            | 1348.16            | 2.854                          | 1567.98            | 4475.60            |
| A_68_P20351044 | chr1:74931604-74931648                            | NM_153111:356       | Fev        | INSIDE                 | 1.728                                                        | 0.267                          | 2685.54            | 716.56             | 0.461                          | 1784.15            | 822.48             |
| A_68_P24642400 | chr6:91929179-91929223                            | NM_172731:-7903     | Fgd5       | PROMOTER               | 1.629                                                        | 0.395                          | 2597.95            | 1026.01            | 0.643                          | 1718.17            | 1105.19            |
| A_68_P32408595 | chrX:56387162-56387206                            | NM_010200:429       | Fgf13      | INSIDE                 | 1.979                                                        | 0.311                          | 1261.91            | 392.17             | 0.615                          | 1698.91            | 1044.83            |
| A_68_P21278824 | chr2:63936695-63936739                            | NM_021716:-647      | Fign       | PROMOTER               | 1.661                                                        | 2.118                          | 538.99             | 1141.77            | 3.518                          | 411.11             | 1446.40            |
| A_68_P24115931 | chr5:135825936-135825980                          | NM_033571:-97       | Fkbp6      | DIVERGENT_PROMOTER     | 1.824                                                        | 1.574                          | 704.41             | 1109.04            | 2.872                          | 547.06             | 1570.95            |
| A_68_P32441101 | chrX:65932010-65932054                            | NM_008031:303       | Fmr1       | INSIDE                 | 1.992                                                        | 0.297                          | 1599.72            | 474.71             | 0.591                          | 2304.18            | 1362.31            |
| A_68_P29712960 | chr14:72932250-72932294                           | NM_207636:177538    | Fndc3a     | DOWNSTREAM             | 1.664                                                        | 0.301                          | 1859.19            | 559.88             | 0.501                          | 1521.85            | 762.55             |
| A_68_P22134616 | chr3:52073560-52073612                            | NM_019739:1328      | Foxo1      | INSIDE                 | 1.940                                                        | 0.183                          | 2769.06            | 506.36             | 0.355                          | 2060.18            | 730.76             |
| A_68_P27094080 | chr10:41996065-41996109                           | NM_019740:462       | Foxo3      | INSIDE                 | 3.189                                                        | 0.488                          | 1655.90            | 808.58             | 1.557                          | 1214.85            | 1891.52            |
| A_68_P32563074 | chrX:98449869-98449914                            | NM_018789:25        | Foxo4      | INSIDE                 | 1.514                                                        | 2.626                          | 281.88             | 740.27             | 3.976                          | 328.81             | 1307.51            |
| A_68_P23250319 | chr4:119941839-119941885                          | NM_194060:18004     | Foxo6      | INSIDE                 | 1.757                                                        | 2.373                          | 474.54             | 1126.11            | 4.169                          | 328.99             | 1371.62            |
| A_68_P31927969 | chr19:5307468-5307512                             | NM_001024717:9160   | Gal3st3    | INSIDE                 | 1.899                                                        | 2.270                          | 533.63             | 1211.34            | 4.310                          | 441.31             | 1901.92            |
| A_68_P24620361 | chr6:88149067-88149115                            | NM_008090:433       | Gata2      | INSIDE                 | 1.736                                                        | 2.264                          | 284.27             | 643.48             | 3.930                          | 220.78             | 867.73             |
| A_68_P23968414 | chr5:108150872-108150916                          | NM_010278:2469      | Gfi1       | INSIDE                 | 1.570                                                        | 1.690                          | 810.46             | 1369.39            | 2.653                          | 672.04             | 1783.15            |
| A_68_P28989506 | chr13:43399105-43399149                           | NM_001033399:415    | Gfod1      | INSIDE                 | 1.571                                                        | 2.029                          | 435.09             | 882.67             | 3.186                          | 346.76             | 1104.88            |
| A_68_P20553865 | chr1:120734246-120734290                          | NM_001081125:215928 | Gli2       | INSIDE                 | 2.177                                                        | 1.864                          | 939.88             | 1751.56            | 4.057                          | 806.68             | 3272.86            |
| A_68_P21565612 | chr2:118528731-118528775                          | NM_001081971:947    | Gm1337     | INSIDE                 | 1.584                                                        | 0.199                          | 4636.43            | 923.64             | 0.316                          | 2941.44            | 928.25             |

| ProbeName      | Target position of probe on CpG island microarray | TargetID            | GeneSymbol | CpG island Description | Ratio of relative methylation (TiO <sub>2</sub> -NP/Vehicle) | Sham group                     |                    |                    | TiO <sub>2</sub> -H group      |                    |                    |
|----------------|---------------------------------------------------|---------------------|------------|------------------------|--------------------------------------------------------------|--------------------------------|--------------------|--------------------|--------------------------------|--------------------|--------------------|
|                |                                                   |                     |            |                        |                                                              | Relative methylation (Cy5/Cy3) | Cy3 signal (Input) | Cy5 signal (MeDIP) | Relative methylation (Cy5/Cy3) | Cy3 signal (Input) | Cy5 signal (MeDIP) |
| A_68_P21565607 | chr2:118528199-118528243                          | NM_001081971:1479   | Gm1337     | INSIDE                 | 2.449                                                        | 0.255                          | 2260.52            | 577.06             | 0.625                          | 1654.55            | 1034.37            |
| A_68_P21393860 | chr2:84499188-84499232                            | NM_001145100:-25    | Gm13718    | DIVERGENT_PROMOTER     | 1.565                                                        | 1.819                          | 519.35             | 944.47             | 2.846                          | 426.74             | 1214.56            |
| A_68_P28577475 | chr12:81859600-81859644                           | NM_001008423:2080   | Gm1568     | INSIDE                 | 1.609                                                        | 1.836                          | 768.46             | 1410.83            | 2.953                          | 652.26             | 1926.39            |
| A_68_P28577470 | chr12:81858836-81858880                           | NM_001008423:2844   | Gm1568     | INSIDE                 | 1.507                                                        | 2.963                          | 556.94             | 1650.35            | 4.466                          | 420.40             | 1877.31            |
| A_68_P24225086 | chr6:8209405-8209449                              | NR_033518:139       | Gm16039    | INSIDE                 | 1.837                                                        | 0.140                          | 5642.36            | 790.47             | 0.257                          | 3767.88            | 969.76             |
| A_68_P26156363 | chr8:111864572-111864616                          | NR_002928:214       | Gm1943     | INSIDE                 | 1.599                                                        | 1.488                          | 582.11             | 866.47             | 2.380                          | 532.26             | 1266.95            |
| A_68_P26886025 | chr9:121766341-121766385                          | NM_001112668:287    | Gm9790     | INSIDE                 | 1.516                                                        | 0.157                          | 3381.31            | 530.35             | 0.238                          | 2281.90            | 542.74             |
| A_68_P29002205 | chr13:45602874-45602918                           | NM_025508:59        | Gmpr       | INSIDE                 | 1.531                                                        | 0.356                          | 1557.92            | 554.04             | 0.545                          | 1301.95            | 708.93             |
| A_68_P21874746 | chr2:174153286-174153330                          | NR_003258:-106      | Gnas       | PROMOTER               | 1.724                                                        | 1.934                          | 675.21             | 1305.65            | 3.334                          | 531.82             | 1773.19            |
| A_68_P21874752 | chr2:174154225-174154269                          | NM_001077510:-1343  | Gnas       | PROMOTER               | 1.602                                                        | 2.507                          | 808.27             | 2026.45            | 4.017                          | 672.22             | 2700.54            |
| A_68_P21874518 | chr2:174125914-174125958                          | NM_201617:2577      | Gnas       | INSIDE                 | 1.728                                                        | 1.699                          | 452.44             | 768.55             | 2.936                          | 400.19             | 1174.77            |
| A_68_P21874507 | chr2:174124666-174124710                          | NM_201617:1329      | Gnas       | INSIDE                 | 3.046                                                        | 0.619                          | 738.53             | 457.38             | 1.886                          | 622.75             | 1174.72            |
| A_68_P30641174 | chr16:30309847-30309891                           | NM_008148:997       | Gp5        | INSIDE                 | 1.766                                                        | 0.320                          | 1564.95            | 500.53             | 0.565                          | 1214.54            | 685.85             |
| A_68_P28080237 | chr11:102417265-102417309                         | NM_001159492:186    | Gpatch8    | INSIDE                 | 1.677                                                        | 0.216                          | 3121.03            | 675.32             | 0.363                          | 2300.98            | 834.83             |
| A_68_P32380514 | chrX:49518048-49518092                            | NM_008150:30        | Gpc4       | INSIDE                 | 61.524                                                       | 0.065                          | 1399.00            | 90.81              | 3.994                          | 1906.71            | 7614.88            |
| A_68_P32380515 | chrX:49518249-49518293                            | NM_008150:-170      | Gpc4       | PROMOTER               | 10.005                                                       | 0.221                          | 1132.83            | 250.79             | 2.215                          | 1539.10            | 3409.03            |
| A_68_P32239706 | chrX:7274518-7274562                              | NM_173747:281       | Gpkow      | INSIDE                 | 6.175                                                        | 0.327                          | 901.99             | 295.18             | 2.021                          | 1162.22            | 2348.67            |
| A_68_P24135223 | chr5:139856324-139856369                          | NM_030258:-274      | Gpr146     | PROMOTER               | 1.662                                                        | 1.968                          | 274.18             | 539.44             | 3.269                          | 202.68             | 662.60             |
| A_68_P24863969 | chr6:134820135-134820179                          | NM_001167697:17721  | Gpr19      | INSIDE                 | 1.843                                                        | 4.031                          | 579.69             | 2336.83            | 7.431                          | 428.98             | 3187.78            |
| A_68_P22351747 | chr3:96709002-96709046                            | NM_026229:197       | Gpr89      | INSIDE                 | 1.871                                                        | 1.576                          | 533.53             | 841.00             | 2.950                          | 437.29             | 1290.01            |
| A_68_P27280641 | chr10:79516441-79516485                           | NM_001037741:-319   | Gpx4       | PROMOTER               | 1.528                                                        | 0.176                          | 2834.81            | 497.87             | 0.268                          | 1951.86            | 523.91             |
| A_68_P28056597 | chr11:98319612-98319657                           | NM_010346:11487     | Grb7       | DOWNSTREAM             | 1.578                                                        | 0.138                          | 3883.85            | 535.77             | 0.218                          | 2521.03            | 548.76             |
| A_68_P24156244 | chr5:144131752-144131796                          | NM_133355:6188      | Grid2ip    | INSIDE                 | 1.694                                                        | 0.303                          | 1815.43            | 549.57             | 0.513                          | 1340.64            | 687.37             |
| A_68_P28152301 | chr11:115111293-115111337                         | NM_010350:17243     | Grin2c     | INSIDE                 | 3.224                                                        | 1.760                          | 793.83             | 1397.33            | 5.676                          | 698.84             | 3966.33            |
| A_68_P26804377 | chr9:106553386-106553432                          | NM_001160353:5032   | Grm2       | INSIDE                 | 1.656                                                        | 1.807                          | 377.80             | 682.59             | 2.992                          | 294.56             | 881.45             |
| A_68_P26804376 | chr9:106553310-106553354                          | NM_001160353:5108   | Grm2       | INSIDE                 | 1.848                                                        | 1.497                          | 648.69             | 970.98             | 2.766                          | 402.07             | 1112.10            |
| A_68_P25301151 | chr7:95278746-95278790                            | NM_001081414:546091 | Grm5       | INSIDE                 | 2.120                                                        | 1.363                          | 1351.23            | 1841.59            | 2.890                          | 1033.99            | 2987.83            |
| A_68_P29731241 | chr14:76410609-76410653                           | NM_026816:42        | Gtf2i2     | INSIDE                 | 1.795                                                        | 0.312                          | 1724.64            | 538.92             | 0.561                          | 1194.18            | 669.73             |
| A_68_P23977822 | chr5:110536969-110537013                          | NM_145147:226       | Gtpbp6     | INSIDE                 | 1.699                                                        | 0.315                          | 2420.61            | 761.52             | 0.534                          | 1757.54            | 939.16             |
| A_68_P27893905 | chr11:69049315-69049359                           | NM_008192:1188      | Gucy2e     | INSIDE                 | 1.541                                                        | 0.419                          | 2068.04            | 866.60             | 0.646                          | 1463.12            | 944.98             |
| A_68_P32507213 | chrX:83022104-83022148                            | NM_008194:32        | Gyk        | INSIDE                 | 5.864                                                        | 0.336                          | 2422.30            | 813.29             | 1.969                          | 2706.02            | 5327.99            |
| A_68_P24904451 | chr6:142363030-142363089                          | NM_145572:58570     | Gys2       | DOWNSTREAM             | 5.355                                                        | 0.662                          | 863.47             | 571.55             | 3.545                          | 537.27             | 1904.41            |
| A_68_P30473862 | chr15:98087209-98087253                           | NM_027304:508       | H1fit      | INSIDE                 | 1.606                                                        | 1.620                          | 954.26             | 1546.11            | 2.602                          | 873.30             | 2272.54            |
| A_68_P32465786 | chrX:71211813-71211857                            | NM_008224:-180      | Hefe1      | PROMOTER               | 2.939                                                        | 0.230                          | 1366.39            | 314.92             | 0.677                          | 1731.22            | 1172.57            |
| A_68_P32241074 | chrX:7524906-7524950                              | NM_001130416:87     | Hdac6      | INSIDE                 | 4.492                                                        | 0.607                          | 3825.27            | 2320.66            | 2.725                          | 4633.10            | 12626.24           |
| A_68_P32241075 | chrX:7525044-7525088                              | NM_001130416:-51    | Hdac6      | PROMOTER               | 3.194                                                        | 0.509                          | 1639.57            | 833.72             | 1.624                          | 2095.91            | 3403.82            |
| A_68_P31253724 | chr17:56218702-56218746                           | NM_008233:-355      | Hdgfrp2    | DIVERGENT_PROMOTER     | 2.469                                                        | 0.141                          | 7388.62            | 1040.37            | 0.348                          | 4630.24            | 1609.56            |
| A_68_P26885589 | chr9:121698137-121698187                          | NR_027967:2076      | Hhat1      | INSIDE                 | 2.288                                                        | 1.626                          | 500.78             | 814.04             | 3.719                          | 414.01             | 1539.80            |
| A_68_P27812443 | chr11:54679796-54679846                           | NM_008248:-119      | Hint1      | DIVERGENT_PROMOTER     | 1.895                                                        | 2.380                          | 248.26             | 590.93             | 4.510                          | 173.83             | 783.91             |
| A_68_P32672782 | chrX:131135885-131135929                          | NM_019868:82        | Hnrnp2     | INSIDE                 | 2.464                                                        | 0.562                          | 2657.04            | 1493.76            | 1.385                          | 3488.49            | 4832.40            |
| A_68_P31149893 | chr17:33787074-33787118                           | NM_001109913:35307  | Hnrnp1     | INSIDE                 | 1.808                                                        | 1.668                          | 589.13             | 982.79             | 3.016                          | 574.68             | 1733.42            |
| A_68_P31149892 | chr17:33786930-33786974                           | NM_001109913:35451  | Hnrnp1     | INSIDE                 | 2.297                                                        | 1.398                          | 963.35             | 1346.75            | 3.211                          | 802.72             | 2577.27            |
| A_68_P24449293 | chr6:52183630-52183674                            | NM_008263:1286      | Hoxa10     | INSIDE                 | 1.588                                                        | 0.293                          | 2830.25            | 830.02             | 0.466                          | 1972.81            | 918.58             |
| A_68_P21338760 | chr2:74520854-74520898                            | NM_008273:427       | Hoxd11     | INSIDE                 | 1.503                                                        | 1.606                          | 794.93             | 1277.00            | 2.414                          | 550.14             | 1328.16            |
| A_68_P23295049 | chr4:128798702-128798746                          | NM_010471:-189      | Hpca       | PROMOTER               | 1.586                                                        | 0.278                          | 2390.01            | 665.10             | 0.441                          | 1676.39            | 739.71             |

| ProbeName      | Target position of probe on CpG island microarray | TargetID           | GeneSymbol | CpG island Description | Ratio of relative methylation (TiO <sub>2</sub> -NP/Vehicle) | Sham group                     |                    |                    | TiO <sub>2</sub> -H group      |                    |                    |
|----------------|---------------------------------------------------|--------------------|------------|------------------------|--------------------------------------------------------------|--------------------------------|--------------------|--------------------|--------------------------------|--------------------|--------------------|
|                |                                                   |                    |            |                        |                                                              | Relative methylation (Cy5/Cy3) | Cy3 signal (Input) | Cy5 signal (MeDIP) | Relative methylation (Cy5/Cy3) | Cy3 signal (Input) | Cy5 signal (MeDIP) |
| A_68_P20146386 | chr1:36160613-36160657                            | NM_015818:35390    | Hs6st1     | INSIDE                 | 1.584                                                        | 1.853                          | 925.69             | 1715.49            | 2.936                          | 730.38             | 2144.55            |
| A_68_P32378025 | chrX:49034174-49034218                            | NM_015819:-542     | Hs6st2     | PROMOTER               | 5.909                                                        | 0.369                          | 513.47             | 189.23             | 2.178                          | 863.98             | 1881.51            |
| A_68_P32378022 | chrX:49033742-49033786                            | NM_015819:-110     | Hs6st2     | PROMOTER               | 2.175                                                        | 0.640                          | 2173.56            | 1390.68            | 1.392                          | 2795.09            | 3889.74            |
| A_68_P24118365 | chr5:136364296-136364340                          | NM_013560:530      | Hspb1      | INSIDE                 | 1.523                                                        | 0.187                          | 2755.66            | 514.34             | 0.284                          | 1786.65            | 507.87             |
| A_68_P32399260 | chrX:54306606-54306650                            | NM_028242:-118     | Htatsf1    | PROMOTER               | 4.864                                                        | 0.135                          | 1244.97            | 168.41             | 0.658                          | 1743.33            | 1147.10            |
| A_68_P32746464 | chrX:148238102-148238146                          | NM_021523:300      | Huwei1     | INSIDE                 | 2.779                                                        | 0.180                          | 2429.92            | 438.56             | 0.502                          | 3154.13            | 1582.19            |
| A_68_P32746468 | chrX:148238435-148238479                          | NM_021523:632      | Huwei1     | INSIDE                 | 1.845                                                        | 0.347                          | 1722.71            | 597.79             | 0.640                          | 1999.73            | 1280.02            |
| A_68_P26658578 | chr9:78023836-78023880                            | NM_019987:62814    | Ick        | DOWNSTREAM             | 1.638                                                        | 0.336                          | 1825.54            | 612.89             | 0.550                          | 1395.07            | 766.97             |
| A_68_P20296825 | chr1:65225492-65225536                            | NM_010497:202      | Idh1       | INSIDE                 | 1.515                                                        | 0.410                          | 1695.33            | 695.45             | 0.622                          | 1416.10            | 880.13             |
| A_68_P21103419 | chr2:30325956-30326000                            | NM_030244:3741     | Ier5l      | DOWNSTREAM             | 1.605                                                        | 0.343                          | 2161.39            | 740.55             | 0.550                          | 1642.82            | 903.44             |
| A_68_P20833279 | chr1:174412349-174412393                          | NM_033608:-77      | Igsf9      | PROMOTER               | 1.830                                                        | 0.193                          | 2408.90            | 465.85             | 0.354                          | 1925.94            | 681.49             |
| A_68_P27340040 | chr10:90564963-90565014                           | NM_027078:19205    | Ikbip      | INSIDE                 | 2.268                                                        | 2.131                          | 412.10             | 878.02             | 4.833                          | 314.48             | 1519.95            |
| A_68_P27902198 | chr11:70513486-70513530                           | NM_213729:149      | Inca1      | INSIDE                 | 1.704                                                        | 0.373                          | 1682.66            | 626.86             | 0.635                          | 1299.08            | 824.54             |
| A_68_P25656209 | chr8:11555685-11555729                            | NM_011919:-359     | Ing1       | DIVERGENT_PROMOTER     | 1.740                                                        | 0.270                          | 5636.96            | 1523.50            | 0.470                          | 3196.92            | 1503.60            |
| A_68_P25656260 | chr8:11561678-11561724                            | NM_011919:5635     | Ing1       | INSIDE                 | 1.948                                                        | 1.552                          | 1273.73            | 1976.26            | 3.023                          | 996.74             | 3013.09            |
| A_68_P25613343 | chr8:3279377-3279421                              | NM_010568:219      | Insr       | INSIDE                 | 1.543                                                        | 0.255                          | 1912.01            | 487.08             | 0.393                          | 1470.64            | 578.08             |
| A_68_P22080609 | chr3:40439835-40439879                            | NM_175515:168      | Intu       | INSIDE                 | 1.596                                                        | 1.973                          | 428.44             | 845.19             | 3.149                          | 386.19             | 1216.25            |
| A_68_P24634428 | chr6:90686241-90686285                            | NM_001134384:73855 | Iqsec1     | INSIDE                 | 1.650                                                        | 0.353                          | 3009.87            | 1062.80            | 0.582                          | 2298.95            | 1339.06            |
| A_68_P32748065 | chrX:148579255-148579299                          | NM_00114664:466    | Iqsec2     | INSIDE                 | 2.361                                                        | 0.659                          | 796.04             | 524.81             | 1.557                          | 945.39             | 1471.80            |
| A_68_P32466000 | chrX:71269156-71269200                            | NM_001177975:79    | Irak1      | INSIDE                 | 1.524                                                        | 1.825                          | 346.10             | 631.57             | 2.781                          | 389.37             | 1082.67            |
| A_68_P26258349 | chr8:129107965-129108009                          | NM_001164598:9350  | Irf2bp2    | DOWNSTREAM             | 1.591                                                        | 2.285                          | 885.07             | 2022.28            | 3.636                          | 712.81             | 2591.75            |
| A_68_P26258430 | chr8:129118076-129118120                          | NM_001164598:-762  | Irf2bp2    | PROMOTER               | 1.563                                                        | 0.396                          | 2117.82            | 838.03             | 0.619                          | 1574.73            | 974.21             |
| A_68_P25004860 | chr7:25217492-25217536                            | NM_199013:13187    | Irgc1      | INSIDE                 | 2.142                                                        | 1.731                          | 440.08             | 761.58             | 3.707                          | 320.09             | 1186.70            |
| A_68_P26531906 | chr9:55394278-55394322                            | NM_027397:5345     | Isl2       | DOWNSTREAM             | 1.522                                                        | 0.234                          | 1850.22            | 433.38             | 0.356                          | 1441.72            | 513.96             |
| A_68_P28036506 | chr11:94937357-94937401                           | NM_013565:650      | Itga3      | INSIDE                 | 1.670                                                        | 0.113                          | 4784.33            | 540.29             | 0.189                          | 3225.48            | 608.12             |
| A_68_P29717288 | chr14:73784719-73784763                           | NM_008410:338      | Itm2b      | INSIDE                 | 1.584                                                        | 3.100                          | 6962.05            | 21584.94           | 4.910                          | 4986.58            | 24483.19           |
| A_68_P20058120 | chr1:17082054-17082098                            | NM_020604:5894     | Jph1       | INSIDE                 | 1.650                                                        | 1.440                          | 1229.62            | 1770.80            | 2.376                          | 920.75             | 2187.68            |
| A_68_P29616405 | chr14:55733423-55733480                           | NM_177049:2321     | Jph4       | INSIDE                 | 2.280                                                        | 2.002                          | 1122.21            | 2246.68            | 4.564                          | 773.50             | 3529.98            |
| A_68_P29613096 | chr14:55195734-55195778                           | NM_010590:742      | Jub        | INSIDE                 | 1.924                                                        | 5.119                          | 2649.16            | 13561.20           | 9.847                          | 2311.01            | 22755.52           |
| A_68_P32029537 | chr19:25484593-25484638                           | NM_181404:172924   | Kank1      | INSIDE                 | 1.507                                                        | 2.285                          | 2394.53            | 5471.72            | 3.443                          | 1589.63            | 5473.83            |
| A_68_P26348936 | chr9:21599583-21599627                            | NM_145611:3386     | Kank2      | INSIDE                 | 1.759                                                        | 1.910                          | 501.90             | 958.76             | 3.361                          | 448.01             | 1505.68            |
| A_68_P22403732 | chr3:106838896-106838940                          | NM_008418:-161     | Kena3      | PROMOTER               | 1.789                                                        | 0.142                          | 3571.14            | 507.56             | 0.254                          | 2358.78            | 599.69             |
| A_68_P25099052 | chr7:53682950-53683004                            | NM_001112739:31110 | Kenc1      | INSIDE                 | 1.564                                                        | 1.650                          | 407.92             | 672.90             | 2.581                          | 344.82             | 889.84             |
| A_68_P22397119 | chr3:105261830-105261874                          | NM_019931:119      | Kenc3      | INSIDE                 | 1.731                                                        | 1.781                          | 303.17             | 539.90             | 3.083                          | 250.77             | 773.21             |
| A_68_P32707348 | chrX:138739964-138740008                          | NM_021487:755      | Kene11     | INSIDE                 | 3.176                                                        | 0.708                          | 1822.01            | 1290.10            | 2.249                          | 2308.97            | 5191.85            |
| A_68_P30366726 | chr15:79315953-79315997                           | NM_008427:19697    | Kenj4      | INSIDE                 | 2.331                                                        | 2.447                          | 581.72             | 1423.23            | 5.702                          | 398.66             | 2273.14            |
| A_68_P20832394 | chr1:174256462-174256506                          | NM_008429:2910     | Kenj9      | INSIDE                 | 1.738                                                        | 0.292                          | 1705.00            | 498.67             | 0.508                          | 1191.95            | 605.77             |
| A_68_P29469017 | chr14:24824321-24824365                           | NM_010610:-915     | Kenma1     | PROMOTER               | 2.399                                                        | 2.574                          | 193.74             | 498.61             | 6.174                          | 149.01             | 919.99             |
| A_68_P27475787 | chr10:115911149-115911205                         | NM_021452:-597     | Kenmb4     | PROMOTER               | 1.517                                                        | 2.621                          | 290.22             | 760.53             | 3.975                          | 215.55             | 856.77             |
| A_68_P25954564 | chr8:73386897-73386941                            | NM_032397:-6011    | Kenn1      | PROMOTER               | 1.500                                                        | 6.261                          | 840.75             | 5263.93            | 9.393                          | 619.46             | 5818.55            |
| A_68_P25599895 | chr7:150481208-150481262                          | NR_001461:1218     | Kenq1ot1   | INSIDE                 | 1.654                                                        | 1.374                          | 2449.59            | 3366.09            | 2.272                          | 1823.34            | 4142.94            |
| A_68_P25599898 | chr7:150481545-150481589                          | NR_001461:886      | Kenq1ot1   | INSIDE                 | 2.601                                                        | 0.682                          | 986.10             | 672.52             | 1.774                          | 700.25             | 1242.20            |
| A_68_P26346083 | chr9:21038393-21038437                            | NM_001110305:5362  | Keap1      | INSIDE                 | 1.594                                                        | 1.654                          | 1336.36            | 2210.62            | 2.636                          | 945.49             | 2492.56            |
| A_68_P28748396 | chr12:113414015-113414059                         | NM_001097621:29618 | Kif26a     | INSIDE                 | 1.730                                                        | 1.975                          | 900.70             | 1779.15            | 3.418                          | 683.57             | 2336.22            |
| A_68_P32560535 | chrX:97821487-97821531                            | NM_008446:105      | Kif4       | INSIDE                 | 2.286                                                        | 0.260                          | 1904.88            | 495.30             | 0.594                          | 2503.48            | 1487.94            |

| ProbeName      | Target position of probe on CpG island microarray | TargetID           | GeneSymbol | CpG island Description | Ratio of relative methylation (TiO <sub>2</sub> -NP/Vehicle) | Sham group                     |                    |                    | TiO <sub>2</sub> -H group      |                    |                    |
|----------------|---------------------------------------------------|--------------------|------------|------------------------|--------------------------------------------------------------|--------------------------------|--------------------|--------------------|--------------------------------|--------------------|--------------------|
|                |                                                   |                    |            |                        |                                                              | Relative methylation (Cy5/Cy3) | Cy3 signal (Input) | Cy5 signal (MeDIP) | Relative methylation (Cy5/Cy3) | Cy3 signal (Input) | Cy5 signal (MeDIP) |
| A_68_P28745984 | chr12:113012732-113012779                         | NM_008450:15696    | Klc1       | INSIDE                 | 1.516                                                        | 1.643                          | 686.42             | 1127.46            | 2.490                          | 533.02             | 1326.97            |
| A_68_P25952090 | chr8:73000940-73000985                            | NM_001122830:-120  | Klh126     | PROMOTER               | 1.669                                                        | 0.330                          | 1622.05            | 534.58             | 0.550                          | 1096.92            | 603.54             |
| A_68_P25951933 | chr8:72975932-72975976                            | NM_001122830:24888 | Klh126     | INSIDE                 | 1.959                                                        | 1.948                          | 433.02             | 843.53             | 3.816                          | 354.97             | 1354.58            |
| A_68_P25951936 | chr8:72976257-72976301                            | NM_001122830:24564 | Klh126     | INSIDE                 | 1.835                                                        | 1.784                          | 393.61             | 702.20             | 3.273                          | 368.26             | 1205.30            |
| A_68_P26216539 | chr8:122394248-122394292                          | NM_146219:8066     | Klh136     | INSIDE                 | 1.596                                                        | 1.599                          | 505.80             | 808.68             | 2.552                          | 435.56             | 1111.54            |
| A_68_P21111931 | chr2:31742789-31742833                            | NM_011836:10       | Lamc3      | INSIDE                 | 1.682                                                        | 2.699                          | 2216.13            | 5982.30            | 4.540                          | 1867.86            | 8480.68            |
| A_68_P29629465 | chr14:58318680-58318724                           | NM_015771:46258    | Lats2      | INSIDE                 | 2.607                                                        | 1.658                          | 689.44             | 1142.92            | 4.322                          | 532.08             | 2299.53            |
| A_68_P25101651 | chr7:54101747-54101791                            | NM_001136069:-683  | Ldha       | PROMOTER               | 1.729                                                        | 2.175                          | 339.47             | 738.22             | 3.760                          | 284.90             | 1071.22            |
| A_68_P20619890 | chr1:134086976-134087020                          | NM_001033250:-1014 | Leml1      | PROMOTER               | 1.840                                                        | 1.810                          | 1646.03            | 2980.13            | 3.332                          | 1149.32            | 3829.46            |
| A_68_P27470613 | chr10:115024518-115024562                         | NM_010195:296      | Lgr5       | INSIDE                 | 1.839                                                        | 0.245                          | 2171.00            | 532.17             | 0.451                          | 1610.90            | 726.18             |
| A_68_P20637452 | chr1:137001893-137001941                          | NM_001033409:-63   | Lgr6       | PROMOTER               | 2.422                                                        | 4.446                          | 4998.07            | 22220.63           | 10.766                         | 3343.21            | 35991.99           |
| A_68_P21137825 | chr2:35959267-35959311                            | NM_001083126:292   | Lhx6       | INSIDE                 | 1.802                                                        | 0.194                          | 2317.86            | 450.57             | 0.350                          | 1731.51            | 606.54             |
| A_68_P26537272 | chr9:56468941-56468985                            | NM_181074:64098    | Lingo1     | INSIDE                 | 1.653                                                        | 3.085                          | 633.99             | 1956.15            | 5.099                          | 577.55             | 2944.92            |
| A_68_P29054563 | chr13:55463630-55463674                           | NM_025828:492      | Lman2      | INSIDE                 | 1.805                                                        | 0.217                          | 2875.17            | 625.02             | 0.392                          | 1990.88            | 781.29             |
| A_68_P27286342 | chr10:80380790-80380834                           | NM_010722:178      | Lmnb2      | INSIDE                 | 1.586                                                        | 0.325                          | 1581.34            | 513.81             | 0.515                          | 1088.62            | 561.15             |
| A_68_P25406573 | chr7:116318129-116318173                          | NM_057173:-4328    | Lmo1       | PROMOTER               | 2.469                                                        | 0.252                          | 1759.47            | 444.02             | 0.623                          | 1325.32            | 825.90             |
| A_68_P24159376 | chr5:144861468-144861512                          | NM_001081109:186   | Lmtk2      | INSIDE                 | 1.574                                                        | 0.403                          | 1643.20            | 661.93             | 0.634                          | 1281.72            | 812.68             |
| A_68_P25031176 | chr7:31140849-31140896                            | NM_175478:6919     | Lrnf3      | INSIDE                 | 1.619                                                        | 1.958                          | 404.54             | 791.98             | 3.170                          | 318.58             | 1009.97            |
| A_68_P25031175 | chr7:31140774-31140818                            | NM_175478:6995     | Lrnf3      | INSIDE                 | 1.994                                                        | 1.603                          | 781.27             | 1252.73            | 3.197                          | 605.49             | 1935.65            |
| A_68_P24658378 | chr6:94649175-94649219                            | NM_008377:943      | Lrig1      | INSIDE                 | 2.581                                                        | 0.229                          | 2084.00            | 477.63             | 0.592                          | 1595.82            | 943.95             |
| A_68_P25048198 | chr7:35988774-35988818                            | NM_001024707:11568 | Lrp3       | INSIDE                 | 1.769                                                        | 1.947                          | 586.59             | 1141.93            | 3.444                          | 500.55             | 1723.88            |
| A_68_P25048197 | chr7:35988690-35988734                            | NM_001024707:11652 | Lrp3       | INSIDE                 | 1.551                                                        | 1.372                          | 1452.98            | 1992.91            | 2.127                          | 1076.89            | 2290.20            |
| A_68_P27180703 | chr10:60938705-60938749                           | NM_153542:146      | Lrrc20     | INSIDE                 | 2.288                                                        | 9.024                          | 1247.99            | 11261.26           | 20.643                         | 1159.24            | 23929.67           |
| A_68_P27270906 | chr10:77365060-77365104                           | NM_145152:199      | Lrrc3      | INSIDE                 | 1.548                                                        | 3.432                          | 3586.26            | 12307.29           | 5.313                          | 2736.76            | 14541.29           |
| A_68_P21101982 | chr2:30093777-30093821                            | NM_177725:510      | Lrrc8a     | INSIDE                 | 4.251                                                        | 1.957                          | 955.12             | 1869.22            | 8.320                          | 574.18             | 4777.13            |
| A_68_P21102113 | chr2:30112262-30112306                            | NM_177725:18996    | Lrrc8a     | INSIDE                 | 2.022                                                        | 1.769                          | 407.46             | 720.73             | 3.576                          | 320.25             | 1145.16            |
| A_68_P20624277 | chr1:134777288-134777332                          | NM_010732:379      | Lrrn2      | INSIDE                 | 1.718                                                        | 0.294                          | 1764.76            | 519.54             | 0.506                          | 1301.43            | 658.12             |
| A_68_P27765091 | chr11:45758223-45758267                           | NM_028185:193      | Lsm11      | INSIDE                 | 1.534                                                        | 0.288                          | 2141.80            | 616.33             | 0.441                          | 1630.18            | 719.40             |
| A_68_P32539364 | chrX:91786968-91787022                            | NM_019791:419      | Maged1     | INSIDE                 | 11.572                                                       | 0.339                          | 339.65             | 114.98             | 3.917                          | 412.04             | 1614.14            |
| A_68_P32742985 | chrX:147247678-147247726                          | NM_001199246:544   | Maged2     | INSIDE                 | 5.935                                                        | 0.285                          | 892.44             | 254.21             | 1.691                          | 1026.15            | 1734.92            |
| A_68_P31050851 | chr17:12464717-12464771                           | NM_011948:46782    | Map3k4     | INSIDE                 | 1.845                                                        | 1.626                          | 385.90             | 627.60             | 3.001                          | 330.30             | 991.17             |
| A_68_P32375460 | chrX:48558753-48558797                            | NM_134163:235      | Mbnl3      | INSIDE                 | 2.964                                                        | 0.214                          | 1536.57            | 329.20             | 0.635                          | 2032.11            | 1290.50            |
| A_68_P24946817 | chr7:3637393-3637437                              | NM_029934:7713     | Mboat7     | INSIDE                 | 1.777                                                        | 3.262                          | 2159.27            | 7043.79            | 5.798                          | 1525.34            | 8843.73            |
| A_68_P32767191 | chrX:154036331-154036375                          | NM_172307:295      | Mbtps2     | INSIDE                 | 3.803                                                        | 0.459                          | 567.72             | 260.66             | 1.746                          | 880.69             | 1537.88            |
| A_68_P25614334 | chr8:3515198-3515255                              | NM_053177:14708    | Mcoln1     | INSIDE                 | 2.210                                                        | 0.207                          | 2436.92            | 505.26             | 0.458                          | 1788.27            | 819.41             |
| A_68_P26676070 | chr9:81757205-81757249                            | NM_175213:-124     | Mei4       | PROMOTER               | 1.621                                                        | 3.082                          | 1470.15            | 4531.51            | 4.995                          | 1183.85            | 5913.82            |
| A_68_P27922355 | chr11:74584384-74584428                           | NM_026197:42       | Mettl16    | INSIDE                 | 1.530                                                        | 0.178                          | 2736.63            | 487.93             | 0.273                          | 2018.83            | 550.68             |
| A_68_P20293513 | chr1:64663621-64663665                            | NM_025964:100      | Mettl21a   | INSIDE                 | 1.599                                                        | 4.913                          | 1637.15            | 8044.00            | 7.858                          | 1502.99            | 11811.15           |
| A_68_P27787411 | chr11:50039460-50039504                           | NM_145926:646      | Mgat4b     | INSIDE                 | 1.980                                                        | 4.502                          | 382.43             | 1721.71            | 8.913                          | 278.84             | 2485.20            |
| A_68_P32252886 | chrX:10294260-10294304                            | NM_001166635:-208  | Mid1ip1    | PROMOTER               | 2.203                                                        | 0.318                          | 1574.06            | 501.13             | 0.701                          | 2058.97            | 1444.01            |
| A_68_P30547090 | chr16:11254627-11254671                           | NR_035466:-110     | Mir1945    | PROMOTER               | 1.567                                                        | 0.316                          | 2248.78            | 711.56             | 0.496                          | 1709.84            | 847.57             |
| A_68_P25025268 | chr7:29871232-29871276                            | NR_035489:-2541    | Mir1963    | PROMOTER               | 1.638                                                        | 1.764                          | 415.65             | 733.30             | 2.890                          | 357.18             | 1032.21            |
| A_68_P20348301 | chr1:74438711-74438755                            | NR_029743:-2151    | Mir26b     | PROMOTER               | 2.978                                                        | 2.357                          | 827.27             | 1950.27            | 7.021                          | 706.00             | 4957.01            |
| A_68_P32385499 | chrX:50410041-50410085                            | NR_029756:-2536    | Mir322     | PROMOTER               | 49.785                                                       | 0.204                          | 5800.27            | 1184.88            | 10.170                         | 6244.37            | 63505.16           |
| A_68_P22209749 | chr3:67178298-67178342                            | NM_001039543:302   | Mif1       | INSIDE                 | 2.876                                                        | 1.779                          | 1046.06            | 1860.89            | 5.117                          | 666.83             | 3412.09            |

| ProbeName      | Target position of probe on CpG island microarray | TargetID            | GeneSymbol | CpG island Description | Ratio of relative methylation (TiO <sub>2</sub> -NP/Vehicle) | Sham group                     |                    |                    | TiO <sub>2</sub> -H group      |                    |                    |
|----------------|---------------------------------------------------|---------------------|------------|------------------------|--------------------------------------------------------------|--------------------------------|--------------------|--------------------|--------------------------------|--------------------|--------------------|
|                |                                                   |                     |            |                        |                                                              | Relative methylation (Cy5/Cy3) | Cy3 signal (Input) | Cy5 signal (MeDIP) | Relative methylation (Cy5/Cy3) | Cy3 signal (Input) | Cy5 signal (MeDIP) |
| A_68_P21840230 | chr2:168056944-168056988                          | NM_001160330:845    | Mocs3      | INSIDE                 | 1.535                                                        | 1.895                          | 487.01             | 922.94             | 2.910                          | 414.82             | 1207.07            |
| A_68_P32696393 | chrX:136405600-136405644                          | NM_001193309:571    | More4      | INSIDE                 | 1.677                                                        | 0.399                          | 1891.42            | 754.02             | 0.668                          | 2472.22            | 1652.64            |
| A_68_P30422455 | chr15:88813114-88813158                           | NM_031260:-287      | Mov10l1    | DIVERGENT_PROMOTER     | 1.602                                                        | 1.486                          | 2470.29            | 3671.14            | 2.380                          | 1879.55            | 4473.90            |
| A_68_P32470782 | chrX:72376286-72376330                            | NM_008621:-20       | Mpp1       | PROMOTER               | 2.259                                                        | 0.195                          | 2064.33            | 401.99             | 0.440                          | 2710.33            | 1192.38            |
| A_68_P28077443 | chr11:101949878-101949922                         | NM_016695:-71       | Mpp2       | PROMOTER               | 2.098                                                        | 0.193                          | 3210.39            | 619.78             | 0.405                          | 2128.88            | 862.08             |
| A_68_P25394537 | chr7:112959576-112959620                          | NM_025301:3         | Mrpl17     | INSIDE                 | 1.529                                                        | 2.362                          | 2548.18            | 6019.48            | 3.613                          | 2008.51            | 7256.28            |
| A_68_P21069122 | chr2:24830308-24830352                            | NM_001031808:288    | Mrpl41     | INSIDE                 | 2.280                                                        | 0.723                          | 2687.27            | 1941.63            | 1.648                          | 2071.68            | 3413.36            |
| A_68_P32135814 | chr19:45080366-45080410                           | NM_053164:544       | Mrpl43     | INSIDE                 | 2.299                                                        | 0.250                          | 1799.59            | 449.76             | 0.575                          | 1291.80            | 742.32             |
| A_68_P29223483 | chr13:93125415-93125459                           | NM_010829:-478      | Msh3       | PROMOTER               | 1.569                                                        | 0.239                          | 1971.36            | 470.53             | 0.375                          | 1596.63            | 597.95             |
| A_68_P25581954 | chr7:147234659-147234703                          | NM_010836:307       | Msx3       | INSIDE                 | 2.295                                                        | 0.216                          | 2207.42            | 477.63             | 0.497                          | 1627.52            | 808.22             |
| A_68_P25954894 | chr8:73437692-73437736                            | NM_173013:7842      | Mtap1s     | INSIDE                 | 1.991                                                        | 2.071                          | 445.74             | 923.08             | 4.122                          | 366.91             | 1512.58            |
| A_68_P25954889 | chr8:73437195-73437239                            | NM_173013:7344      | Mtap1s     | INSIDE                 | 1.503                                                        | 2.443                          | 1002.78            | 2450.27            | 3.673                          | 734.12             | 2696.25            |
| A_68_P23279071 | chr4:125932970-125933014                          | NM_001145970:571    | Mtap7d1    | INSIDE                 | 1.552                                                        | 0.154                          | 3150.35            | 486.29             | 0.240                          | 2341.62            | 560.84             |
| A_68_P23278936 | chr4:125911491-125911535                          | NM_001145970:22051  | Mtap7d1    | INSIDE                 | 1.543                                                        | 1.770                          | 605.01             | 1070.80            | 2.731                          | 472.27             | 1289.92            |
| A_68_P23278937 | chr4:125911565-125911609                          | NM_001145970:21977  | Mtap7d1    | INSIDE                 | 1.787                                                        | 1.469                          | 1469.61            | 2158.84            | 2.626                          | 1098.38            | 2883.83            |
| A_68_P26224550 | chr8:123632450-123632508                          | NM_001166482:-199   | Mthfsd     | DIVERGENT_PROMOTER     | 2.575                                                        | 8.435                          | 7313.59            | 61693.66           | 21.723                         | 5216.59            | 113321.80          |
| A_68_P22317890 | chr3:89017814-89017858                            | NM_001161824:421    | Mtx1       | INSIDE                 | 1.817                                                        | 0.158                          | 4322.03            | 684.84             | 0.288                          | 2702.35            | 778.07             |
| A_68_P29591680 | chr14:49685967-49686011                           | NM_144535:-181      | Mudeng     | PROMOTER               | 1.729                                                        | 2.017                          | 1046.28            | 2109.90            | 3.486                          | 737.81             | 2572.08            |
| A_68_P29591677 | chr14:49685584-49685628                           | NM_144535:-563      | Mudeng     | PROMOTER               | 1.509                                                        | 0.260                          | 2330.59            | 605.85             | 0.392                          | 1785.02            | 700.21             |
| A_68_P28961844 | chr13:38727138-38727182                           | NM_139063:-182      | Muted      | PROMOTER               | 1.531                                                        | 1.475                          | 950.24             | 1401.85            | 2.259                          | 748.62             | 1690.97            |
| A_68_P32181719 | chr19:53384898-53384942                           | NM_001008542:-75    | Mxi1       | PROMOTER               | 1.508                                                        | 0.240                          | 2140.35            | 514.43             | 0.362                          | 1497.42            | 542.63             |
| A_68_P28246310 | chr12:12948750-12948795                           | NM_008709:-130      | Mycn       | PROMOTER               | 2.008                                                        | 3.679                          | 260.59             | 958.63             | 7.387                          | 267.60             | 1976.74            |
| A_68_P27880945 | chr11:66908117-66908162                           | NM_001099635:16338  | Myh3       | INSIDE                 | 1.521                                                        | 2.111                          | 436.07             | 920.67             | 3.212                          | 351.00             | 1127.30            |
| A_68_P30083232 | chr15:25710801-25710845                           | NM_019472:158518    | Myo10      | INSIDE                 | 2.003                                                        | 2.319                          | 305.15             | 707.70             | 4.645                          | 231.43             | 1075.06            |
| A_68_P30083236 | chr15:25711164-25711208                           | NM_019472:158882    | Myo10      | INSIDE                 | 1.869                                                        | 1.508                          | 789.52             | 1190.24            | 2.818                          | 644.68             | 1816.39            |
| A_68_P30083235 | chr15:25711092-25711136                           | NM_019472:158810    | Myo10      | INSIDE                 | 2.020                                                        | 1.501                          | 740.92             | 1112.48            | 3.033                          | 587.23             | 1780.88            |
| A_68_P27290092 | chr10:80958931-80958975                           | NM_134009:156       | Neln       | INSIDE                 | 1.516                                                        | 0.354                          | 4239.80            | 1501.56            | 0.537                          | 2783.29            | 1494.70            |
| A_68_P24810881 | chr6:122824922-122824967                          | NM_026267:370       | Necap1     | INSIDE                 | 1.664                                                        | 0.234                          | 2510.08            | 587.64             | 0.390                          | 2010.55            | 783.17             |
| A_68_P27349651 | chr10:92185236-92185280                           | NM_008682:-95       | Nedd1      | PROMOTER               | 1.594                                                        | 3.868                          | 1026.85            | 3972.04            | 6.166                          | 844.64             | 5207.63            |
| A_68_P31779044 | chr18:65243606-65243650                           | NM_031881:60448     | Nedd41     | INSIDE                 | 1.789                                                        | 1.879                          | 684.61             | 1286.05            | 3.361                          | 570.07             | 1915.77            |
| A_68_P31779045 | chr18:65243748-65243792                           | NM_031881:60590     | Nedd41     | INSIDE                 | 1.620                                                        | 1.872                          | 371.61             | 695.75             | 3.033                          | 328.71             | 996.84             |
| A_68_P32148154 | chr19:47254136-47254180                           | NM_021360:849       | Neurl1a    | INSIDE                 | 2.454                                                        | 3.531                          | 10959.86           | 38703.66           | 8.665                          | 7399.64            | 64118.75           |
| A_68_P27184377 | chr10:61596546-61596590                           | NM_009719:731       | Neurog3    | INSIDE                 | 1.705                                                        | 0.112                          | 4629.82            | 517.03             | 0.190                          | 2985.56            | 568.41             |
| A_68_P29428097 | chr14:17075904-17075948                           | NM_021504:-5901     | Ngly1      | PROMOTER               | 1.502                                                        | 0.405                          | 1376.50            | 557.39             | 0.608                          | 1114.37            | 677.95             |
| A_68_P32786690 | chrX:158346840-158346884                          | NM_001081052:250860 | Nhs        | INSIDE                 | 3.772                                                        | 0.436                          | 477.00             | 207.86             | 1.644                          | 686.46             | 1128.29            |
| A_68_P32788273 | chrX:158597915-158597959                          | NM_001081052:-214   | Nhs        | PROMOTER               | 4.380                                                        | 0.464                          | 411.34             | 190.82             | 2.032                          | 592.38             | 1203.58            |
| A_68_P27944883 | chr11:78510477-78510521                           | NM_008702:429       | Nlk        | INSIDE                 | 2.545                                                        | 0.696                          | 2646.93            | 1841.40            | 1.770                          | 1946.36            | 3445.82            |
| A_68_P32564062 | chrX:98625083-98625127                            | NM_023144:115       | Nono       | INSIDE                 | 2.829                                                        | 0.587                          | 1493.95            | 876.95             | 1.661                          | 1905.39            | 3164.27            |
| A_68_P28442990 | chr12:54808173-54808232                           | NM_013780:458539    | Npas3      | INSIDE                 | 2.604                                                        | 2.556                          | 1021.39            | 2610.68            | 6.655                          | 682.44             | 4541.62            |
| A_68_P31926196 | chr19:4989991-4990035                             | NM_153553:-41       | Npas4      | PROMOTER               | 1.980                                                        | 2.362                          | 406.11             | 959.10             | 4.676                          | 263.63             | 1232.82            |
| A_68_P22540268 | chr3:132612964-132613008                          | NM_001029836:269    | Npnt       | INSIDE                 | 1.747                                                        | 1.714                          | 1731.25            | 2966.97            | 2.994                          | 1385.21            | 4146.86            |
| A_68_P22325407 | chr3:90269682-90269726                            | NM_008727:84        | Npr1       | INSIDE                 | 1.772                                                        | 0.206                          | 2332.55            | 480.37             | 0.365                          | 1707.74            | 623.32             |
| A_68_P28058390 | chr11:98629362-98629406                           | NM_145434:7172      | Nr1d1      | INSIDE                 | 1.616                                                        | 1.621                          | 778.67             | 1262.07            | 2.619                          | 614.34             | 1609.16            |
| A_68_P25088121 | chr7:51807262-51807306                            | NM_009473:2009      | Nr1h2      | INSIDE                 | 1.682                                                        | 1.730                          | 1979.26            | 3424.77            | 2.910                          | 1609.46            | 4683.19            |
| A_68_P25981542 | chr8:79709972-79710016                            | NM_001083906:283588 | Nr3c2      | INSIDE                 | 1.531                                                        | 1.782                          | 349.27             | 622.44             | 2.729                          | 324.79             | 886.38             |

| ProbeName      | Target position of probe on CpG island microarray | TargetID            | GeneSymbol | CpG island Description | Ratio of relative methylation (TiO <sub>2</sub> -NP/Vehicle) | Sham group                     |                    |                    | TiO <sub>2</sub> -H group      |                    |                    |
|----------------|---------------------------------------------------|---------------------|------------|------------------------|--------------------------------------------------------------|--------------------------------|--------------------|--------------------|--------------------------------|--------------------|--------------------|
|                |                                                   |                     |            |                        |                                                              | Relative methylation (Cy5/Cy3) | Cy3 signal (Input) | Cy5 signal (MeDIP) | Relative methylation (Cy5/Cy3) | Cy3 signal (Input) | Cy5 signal (MeDIP) |
| A_68_P22898182 | chr4:48060289-48060333                            | NM_015743:-3809     | Nr4a3      | PROMOTER               | 2.393                                                        | 1.659                          | 756.90             | 1255.55            | 3.969                          | 625.18             | 2481.39            |
| A_68_P21070362 | chr2:25036916-25036960                            | NM_025980:661       | Nrarp      | INSIDE                 | 1.635                                                        | 0.183                          | 2638.15            | 482.61             | 0.299                          | 1731.34            | 517.99             |
| A_68_P32691811 | chrX:135448869-135448913                          | NM_013724:-78       | Nrk        | PROMOTER               | 2.396                                                        | 0.569                          | 7328.70            | 4171.94            | 1.364                          | 9260.75            | 12630.82           |
| A_68_P32691812 | chrX:135449017-135449063                          | NM_013724:72        | Nrk        | INSIDE                 | 8.865                                                        | 0.368                          | 493.89             | 181.82             | 3.264                          | 842.52             | 2749.69            |
| A_68_P31442544 | chr17:91487486-91487530                           | NM_020252:4634      | Nrxn1      | INSIDE                 | 2.018                                                        | 2.302                          | 485.64             | 1117.90            | 4.646                          | 424.97             | 1974.58            |
| A_68_P31442543 | chr17:91487324-91487368                           | NM_020252:4796      | Nrxn1      | INSIDE                 | 1.817                                                        | 1.943                          | 1145.42            | 2225.01            | 3.529                          | 881.58             | 3111.41            |
| A_68_P31442547 | chr17:91487821-91487865                           | NM_020252:4300      | Nrxn1      | INSIDE                 | 1.594                                                        | 2.062                          | 468.22             | 965.36             | 3.286                          | 452.02             | 1485.32            |
| A_68_P31442548 | chr17:91487890-91487934                           | NM_020252:4230      | Nrxn1      | INSIDE                 | 1.850                                                        | 1.683                          | 641.82             | 1080.50            | 3.114                          | 507.56             | 1580.79            |
| A_68_P22422568 | chr3:109945463-109945507                          | NM_001163348:906    | Ntng1      | INSIDE                 | 1.972                                                        | 0.319                          | 1982.73            | 633.03             | 0.629                          | 1424.00            | 896.34             |
| A_68_P22309972 | chr3:87587929-87587973                            | NM_001033124:11134  | Ntrk1      | INSIDE                 | 2.199                                                        | 1.569                          | 2044.81            | 3208.63            | 3.451                          | 1530.24            | 5280.39            |
| A_68_P30542118 | chr16:10412308-10412352                           | NM_011955:300       | Nubp1      | INSIDE                 | 2.576                                                        | 0.734                          | 3573.45            | 2623.49            | 1.891                          | 2645.25            | 5003.00            |
| A_68_P22063505 | chr3:37318090-37318134                            | NM_153561:400       | Nudt6      | INSIDE                 | 4.156                                                        | 0.120                          | 2067.96            | 247.88             | 0.498                          | 1795.61            | 894.47             |
| A_68_P21102303 | chr2:30142233-30142277                            | NM_198304:302       | Nup188     | INSIDE                 | 1.638                                                        | 0.152                          | 3059.33            | 466.03             | 0.249                          | 2138.98            | 533.67             |
| A_68_P28039261 | chr11:95376208-95376252                           | NM_130858:-351      | Nxph3      | PROMOTER               | 2.040                                                        | 0.324                          | 2834.73            | 917.67             | 0.660                          | 1960.35            | 1294.53            |
| A_68_P32266426 | chrX:13063861-13063905                            | NM_173415:19085     | Nyx        | INSIDE                 | 1.681                                                        | 1.889                          | 334.08             | 631.22             | 3.176                          | 589.98             | 1873.51            |
| A_68_P21100044 | chr2:29744774-29744818                            | NM_001113214:-443   | Odf2       | PROMOTER               | 1.790                                                        | 0.191                          | 4382.86            | 836.92             | 0.342                          | 2890.64            | 988.22             |
| A_68_P25846165 | chr8:49314031-49314075                            | NM_001145937:445992 | Odz3       | INSIDE                 | 3.322                                                        | 1.784                          | 431.03             | 769.15             | 5.928                          | 367.59             | 2179.09            |
| A_68_P25343508 | chr7:103358546-103358591                          | NM_011858:-578      | Odz4       | PROMOTER               | 2.010                                                        | 1.498                          | 4344.14            | 6507.77            | 3.011                          | 3344.48            | 10070.19           |
| A_68_P27280128 | chr10:79440201-79440245                           | NM_001003949:6853   | ORF61      | INSIDE                 | 1.659                                                        | 2.195                          | 695.17             | 1526.00            | 3.641                          | 559.28             | 2036.57            |
| A_68_P23199842 | chr4:108874395-108874439                          | NM_133885:461       | Osbpl9     | INSIDE                 | 1.776                                                        | 0.200                          | 3571.63            | 712.93             | 0.355                          | 2515.70            | 892.03             |
| A_68_P32240442 | chrX:7418743-7418787                              | NM_138604:-192      | Otud5      | PROMOTER               | 4.783                                                        | 0.117                          | 2334.38            | 273.05             | 0.559                          | 3436.31            | 1922.30            |
| A_68_P25173479 | chr7:70902673-70902717                            | NM_130880:313037    | Otud7a     | INSIDE                 | 1.567                                                        | 0.327                          | 1352.09            | 442.30             | 0.513                          | 1046.27            | 536.41             |
| A_68_P23819019 | chr5:77380180-77380224                            | NM_025939:-233      | Paics      | PROMOTER               | 1.758                                                        | 0.241                          | 2192.33            | 527.64             | 0.423                          | 1553.11            | 657.01             |
| A_68_P32071013 | chr19:32670325-32670369                           | NM_001201470:142    | Paps2      | INSIDE                 | 1.822                                                        | 0.205                          | 2227.45            | 457.03             | 0.374                          | 1521.46            | 568.70             |
| A_68_P31041951 | chr17:11033242-11033286                           | NM_016694:15        | Park2      | INSIDE                 | 1.772                                                        | 0.287                          | 1910.66            | 548.03             | 0.508                          | 1440.01            | 731.73             |
| A_68_P26554373 | chr9:59464987-59465031                            | NM_001205239:-82    | Parp6      | PROMOTER               | 1.526                                                        | 3.340                          | 845.14             | 2822.99            | 5.099                          | 648.15             | 3304.86            |
| A_68_P21127262 | chr2:34226792-34226836                            | NM_016768:742       | Pbx3       | INSIDE                 | 1.616                                                        | 0.303                          | 1723.18            | 522.71             | 0.490                          | 1308.56            | 641.41             |
| A_68_P32668459 | chrX:130222079-130222123                          | NM_001105245:1432   | Pcdh19     | INSIDE                 | 1.730                                                        | 2.137                          | 285.14             | 609.41             | 3.698                          | 250.74             | 927.10             |
| A_68_P23720362 | chr5:58110309-58110354                            | NM_018764:1072      | Pcdh7      | INSIDE                 | 3.482                                                        | 0.639                          | 2287.11            | 1460.71            | 2.224                          | 1835.76            | 4082.13            |
| A_68_P20015303 | chr1:7078680-7078724                              | NM_183028:-298      | Pemtd1     | PROMOTER               | 1.689                                                        | 2.187                          | 2152.62            | 4707.41            | 3.694                          | 1689.57            | 6241.42            |
| A_68_P30778928 | chr16:56029876-56029920                           | NM_001024622:-68    | Penp       | PROMOTER               | 1.527                                                        | 0.256                          | 1773.65            | 454.80             | 0.392                          | 1345.79            | 527.11             |
| A_68_P27261658 | chr10:75837803-75837847                           | NM_008787:67833     | Pent       | INSIDE                 | 1.614                                                        | 2.954                          | 164.05             | 484.64             | 4.767                          | 218.99             | 1044.01            |
| A_68_P32240898 | chrX:7499680-7499725                              | NM_013892:2755      | Pesk1n     | INSIDE                 | 6.679                                                        | 0.245                          | 824.75             | 202.36             | 1.639                          | 1055.20            | 1729.15            |
| A_68_P32240899 | chrX:7499781-7499825                              | NM_013892:2855      | Pesk1n     | INSIDE                 | 1.976                                                        | 0.332                          | 2036.08            | 676.01             | 0.656                          | 2725.85            | 1788.51            |
| A_68_P32778406 | chrX:156575977-156576021                          | NM_008810:270       | Pdha1      | INSIDE                 | 2.072                                                        | 0.276                          | 3065.39            | 846.09             | 0.572                          | 4295.24            | 2456.84            |
| A_68_P24172758 | chr5:148081815-148081859                          | NM_008814:130       | Pdx1       | INSIDE                 | 1.623                                                        | 0.218                          | 2266.47            | 494.36             | 0.354                          | 1608.93            | 569.41             |
| A_68_P25587733 | chr7:148445537-148445581                          | NM_001081118:30872  | Phrf1      | INSIDE                 | 1.986                                                        | 2.754                          | 845.36             | 2328.09            | 5.468                          | 611.19             | 3342.18            |
| A_68_P32798240 | chrX:160857773-160857818                          | NM_011081:77        | Piga       | INSIDE                 | 8.287                                                        | 0.056                          | 1524.74            | 85.80              | 0.466                          | 2229.20            | 1039.60            |
| A_68_P26798472 | chr9:105545510-105545554                          | NM_001081309:208    | Pik3r4     | INSIDE                 | 1.512                                                        | 0.310                          | 1822.33            | 565.49             | 0.469                          | 1292.67            | 606.40             |
| A_68_P26949007 | chr10:12810795-12810839                           | NM_009538:223       | Plagl1     | INSIDE                 | 1.571                                                        | 1.604                          | 502.13             | 805.41             | 2.520                          | 473.66             | 1193.50            |
| A_68_P30346606 | chr15:76010797-76010841                           | NM_201394:15322     | Plec       | INSIDE                 | 1.584                                                        | 2.227                          | 522.79             | 1164.31            | 3.529                          | 471.45             | 1663.62            |
| A_68_P30346558 | chr15:76004732-76004776                           | NM_201394:21386     | Plec       | INSIDE                 | 1.757                                                        | 2.136                          | 282.12             | 602.52             | 3.752                          | 235.14             | 882.35             |
| A_68_P30346601 | chr15:76010142-76010186                           | NM_201394:15976     | Plec       | INSIDE                 | 2.270                                                        | 1.702                          | 549.07             | 934.42             | 3.864                          | 398.89             | 1541.12            |
| A_68_P30346580 | chr15:76007443-76007487                           | NM_201394:18676     | Plec       | INSIDE                 | 1.750                                                        | 1.639                          | 487.93             | 799.57             | 2.867                          | 377.14             | 1081.42            |
| A_68_P30346556 | chr15:76004532-76004576                           | NM_201394:21586     | Plec       | INSIDE                 | 1.862                                                        | 1.743                          | 380.99             | 664.23             | 3.246                          | 275.55             | 894.45             |

| ProbeName      | Target position of probe on CpG island microarray | TargetID           | GeneSymbol | CpG island Description | Ratio of relative methylation (TiO <sub>2</sub> -NP/Vehicle) | Sham group                     |                    |                    | TiO <sub>2</sub> -H group      |                    |                    |
|----------------|---------------------------------------------------|--------------------|------------|------------------------|--------------------------------------------------------------|--------------------------------|--------------------|--------------------|--------------------------------|--------------------|--------------------|
|                |                                                   |                    |            |                        |                                                              | Relative methylation (Cy5/Cy3) | Cy3 signal (Input) | Cy5 signal (MeDIP) | Relative methylation (Cy5/Cy3) | Cy3 signal (Input) | Cy5 signal (MeDIP) |
| A_68_P30346557 | chr15:76004653-76004697                           | NM_201394:21466    | Plec       | INSIDE                 | 2.121                                                        | 1.500                          | 534.42             | 801.39             | 3.180                          | 465.60             | 1480.79            |
| A_68_P25957206 | chr8:74031971-74032015                            | NM_032398:3676     | Plvap      | INSIDE                 | 1.819                                                        | 0.236                          | 1907.23            | 450.22             | 0.429                          | 1399.19            | 600.73             |
| A_68_P30423622 | chr15:88998029-88998073                           | NM_001159521:6230  | Plxnb2     | INSIDE                 | 2.411                                                        | 1.607                          | 643.21             | 1033.76            | 3.875                          | 470.78             | 1824.37            |
| A_68_P20347698 | chr1:74331582-74331626                            | NM_025580:-3       | Pnkf       | DIVERGENT_PROMOTER     | 1.765                                                        | 0.305                          | 1703.19            | 519.82             | 0.539                          | 1221.58            | 658.22             |
| A_68_P20347699 | chr1:74331738-74331785                            | NM_025580:154      | Pnkf       | INSIDE                 | 1.694                                                        | 1.725                          | 655.05             | 1130.24            | 2.923                          | 482.29             | 1409.71            |
| A_68_P24117611 | chr5:136209975-136210019                          | NM_008898:44913    | Por        | INSIDE                 | 2.184                                                        | 1.547                          | 890.21             | 1376.88            | 3.378                          | 673.17             | 2273.97            |
| A_68_P20797862 | chr1:167933482-167933526                          | NM_011137:-739     | Pou2f1     | PROMOTER               | 2.040                                                        | 0.179                          | 2526.00            | 452.13             | 0.365                          | 1730.81            | 631.83             |
| A_68_P23269531 | chr4:124337466-124337523                          | NM_011141:2606     | Pou3f1     | INSIDE                 | 1.952                                                        | 4.260                          | 241.30             | 1027.91            | 8.317                          | 93.99              | 781.72             |
| A_68_P32598389 | chrX:108010047-108010091                          | NM_008901:265      | Pou3f4     | INSIDE                 | 5.265                                                        | 0.298                          | 3935.65            | 1171.48            | 1.567                          | 4717.83            | 7394.34            |
| A_68_P25092565 | chr7:52602361-52602407                            | NM_029741:20005    | Ppfi3      | INSIDE                 | 2.535                                                        | 11.831                         | 2987.65            | 35347.23           | 29.987                         | 1937.28            | 58093.45           |
| A_68_P22393108 | chr3:104584185-104584229                          | NM_027982:233      | Ppm1j      | INSIDE                 | 1.972                                                        | 0.246                          | 2316.75            | 569.48             | 0.485                          | 1672.75            | 810.97             |
| A_68_P27430001 | chr10:107598764-107598808                         | NM_027892:-669     | Ppp1r12a   | PROMOTER               | 1.832                                                        | 0.175                          | 3327.76            | 582.55             | 0.321                          | 2329.62            | 747.04             |
| A_68_P32238978 | chrX:7151494-7151538                              | NM_138605:-270     | Ppp1r3f    | DIVERGENT_PROMOTER     | 5.965                                                        | 0.429                          | 1256.22            | 539.47             | 2.562                          | 1721.03            | 4408.97            |
| A_68_P32238976 | chrX:7151221-7151265                              | NM_138605:4        | Ppp1r3f    | INSIDE                 | 1.617                                                        | 1.495                          | 674.16             | 1007.90            | 2.417                          | 789.03             | 1906.97            |
| A_68_P21432203 | chr2:92886316-92886360                            | NM_001177536:-37   | Prdm11     | PROMOTER               | 1.510                                                        | 1.879                          | 971.84             | 1826.31            | 2.838                          | 846.08             | 2401.58            |
| A_68_P23916649 | chr5:98615733-98615777                            | NM_029947:5867     | Prdm8      | INSIDE                 | 1.516                                                        | 0.147                          | 3951.21            | 579.69             | 0.222                          | 2634.54            | 585.82             |
| A_68_P27110004 | chr10:44878135-44878179                           | NM_011156:91137    | Prep       | INSIDE                 | 1.759                                                        | 1.456                          | 657.43             | 957.17             | 2.561                          | 534.61             | 1369.23            |
| A_68_P24983572 | chr7:17428015-17428059                            | NM_178900:-377     | Prkd2      | PROMOTER               | 1.730                                                        | 0.202                          | 2521.34            | 508.68             | 0.349                          | 1818.88            | 634.89             |
| A_68_P20930616 | chr1:191994691-191994750                          | NM_008937:-161     | Prox1      | PROMOTER               | 1.668                                                        | 2.216                          | 242.53             | 537.35             | 3.696                          | 169.99             | 628.26             |
| A_68_P32699217 | chrX:136991521-136991565                          | NM_021463:401      | Prps1      | INSIDE                 | 2.973                                                        | 0.211                          | 1266.95            | 267.82             | 0.629                          | 1920.29            | 1206.99            |
| A_68_P31162032 | chr17:36116207-36116251                           | NR_028516:-260     | Prr3       | PROMOTER               | 1.603                                                        | 4.207                          | 1691.40            | 7116.57            | 6.744                          | 1419.06            | 9570.31            |
| A_68_P30396225 | chr15:84511839-84511883                           | NM_146061:433      | Prr5       | INSIDE                 | 1.620                                                        | 0.312                          | 2530.29            | 789.78             | 0.506                          | 1745.30            | 882.49             |
| A_68_P29055231 | chr13:55574123-55574167                           | NM_001030296:8517  | Prr7       | INSIDE                 | 1.608                                                        | 0.364                          | 1763.37            | 641.56             | 0.585                          | 1317.49            | 770.58             |
| A_68_P21420371 | chr2:90894443-90894487                            | NM_008948:292      | Psmc3      | INSIDE                 | 2.173                                                        | 1.785                          | 2443.15            | 4360.47            | 3.878                          | 1878.91            | 7286.54            |
| A_68_P28107298 | chr11:107341035-107341079                         | NM_025894:215      | Psmc12     | INSIDE                 | 2.060                                                        | 0.238                          | 1905.14            | 454.14             | 0.491                          | 1652.60            | 811.49             |
| A_68_P32071922 | chr19:32831644-32831688                           | NM_008960:-400     | Pten       | PROMOTER               | 1.586                                                        | 2.778                          | 1292.51            | 3590.86            | 4.406                          | 1141.86            | 5031.26            |
| A_68_P22373052 | chr3:100881123-100881167                          | NM_011197:32945    | Ptgifn     | INSIDE                 | 1.502                                                        | 1.645                          | 671.72             | 1105.19            | 2.472                          | 527.59             | 1304.09            |
| A_68_P24983897 | chr7:17492695-17492739                            | NM_008967:878      | Ptgir      | INSIDE                 | 1.528                                                        | 1.588                          | 600.61             | 953.87             | 2.426                          | 465.57             | 1129.69            |
| A_68_P24983894 | chr7:17492409-17492453                            | NM_008967:592      | Ptgir      | INSIDE                 | 2.814                                                        | 0.651                          | 708.64             | 461.56             | 1.833                          | 558.46             | 1023.67            |
| A_68_P31256055 | chr17:56568653-56568712                           | NM_011218:47221    | Ptprs      | INSIDE                 | 5.356                                                        | 3.108                          | 245.36             | 762.48             | 16.645                         | 231.78             | 3857.90            |
| A_68_P23308583 | chr4:131392567-131392611                          | NM_001083119:1605  | Ptpru      | INSIDE                 | 2.257                                                        | 0.269                          | 2368.25            | 636.01             | 0.606                          | 1582.03            | 958.96             |
| A_68_P23308456 | chr4:131375306-131375350                          | NM_001083119:18865 | Ptpru      | INSIDE                 | 1.729                                                        | 1.597                          | 1042.14            | 1664.19            | 2.761                          | 864.47             | 2386.37            |
| A_68_P28071137 | chr11:100820628-100820677                         | NM_008986:11279    | Ptfr       | INSIDE                 | 2.707                                                        | 2.201                          | 210.73             | 463.80             | 5.958                          | 211.95             | 1262.72            |
| A_68_P31107655 | chr17:26122056-26122100                           | NM_153140:36727    | Rab11fip3  | DOWNSTREAM             | 1.685                                                        | 6.674                          | 899.31             | 6001.87            | 11.249                         | 635.66             | 7150.21            |
| A_68_P25015938 | chr7:27964028-27964072                            | NM_029391:-148     | Rab4b      | PROMOTER               | 4.680                                                        | 0.126                          | 4937.38            | 624.26             | 0.592                          | 2873.46            | 1700.28            |
| A_68_P32806533 | chrX:162917564-162917608                          | NM_019773:213      | Rab9       | INSIDE                 | 4.426                                                        | 0.339                          | 1345.44            | 456.69             | 1.502                          | 1695.97            | 2548.07            |
| A_68_P30012296 | chr15:10644051-10644095                           | NM_030690:-777     | Rai14      | PROMOTER               | 2.486                                                        | 0.080                          | 6721.26            | 535.19             | 0.198                          | 4187.07            | 828.76             |
| A_68_P32374343 | chrX:48371227-48371271                            | NM_172413:-53      | Rap2c      | PROMOTER               | 1.855                                                        | 2.627                          | 2565.97            | 6739.85            | 4.874                          | 3133.60            | 15272.22           |
| A_68_P22210462 | chr3:67319224-67319268                            | NM_001164763:199   | Rarres1    | INSIDE                 | 1.553                                                        | 1.481                          | 1178.17            | 1744.78            | 2.300                          | 947.12             | 2178.81            |
| A_68_P29194040 | chr13:85429148-85429192                           | NM_145452:-79      | Rasa1      | PROMOTER               | 1.518                                                        | 0.247                          | 2692.68            | 663.92             | 0.374                          | 1962.77            | 734.81             |
| A_68_P29222297 | chr13:92901976-92902020                           | NM_009027:-549     | Rasgrf2    | PROMOTER               | 3.225                                                        | 6.389                          | 1014.97            | 6484.30            | 20.601                         | 890.04             | 18335.31           |
| A_68_P32790793 | chrX:159198362-159198406                          | NM_009031:81       | Rbbp7      | INSIDE                 | 1.645                                                        | 2.460                          | 233.74             | 575.00             | 4.047                          | 231.53             | 937.09             |
| A_68_P32790792 | chrX:159198218-159198262                          | NM_009031:-63      | Rbbp7      | PROMOTER               | 2.446                                                        | 0.590                          | 2086.11            | 1231.58            | 1.444                          | 2947.80            | 4256.55            |
| A_68_P31862858 | chr18:80389262-80389306                           | NM_199197:8074     | Rbfa       | INSIDE                 | 2.232                                                        | 1.732                          | 287.56             | 498.14             | 3.866                          | 239.31             | 925.26             |
| A_68_P22405767 | chr3:107145905-107145949                          | NM_001045807:-9719 | Rbm15      | PROMOTER               | 2.015                                                        | 1.595                          | 464.07             | 740.00             | 3.213                          | 316.43             | 1016.53            |

| ProbeName      | Target position of probe on CpG island microarray | TargetID           | GeneSymbol | CpG island Description | Ratio of relative methylation (TiO <sub>2</sub> -NP/Vehicle) | Sham group                     |                    |                    | TiO <sub>2</sub> -H group      |                    |                    |
|----------------|---------------------------------------------------|--------------------|------------|------------------------|--------------------------------------------------------------|--------------------------------|--------------------|--------------------|--------------------------------|--------------------|--------------------|
|                |                                                   |                    |            |                        |                                                              | Relative methylation (Cy5/Cy3) | Cy3 signal (Input) | Cy5 signal (MeDIP) | Relative methylation (Cy5/Cy3) | Cy3 signal (Input) | Cy5 signal (MeDIP) |
| A_68_P31654584 | chr18:42435490-42435534                           | NM_172626:506      | Rbm27      | INSIDE                 | 2.095                                                        | 0.187                          | 3474.90            | 651.48             | 0.393                          | 2384.05            | 936.27             |
| A_68_P25032744 | chr7:31435111-31435155                            | NM_133693:115      | Rbm42      | INSIDE                 | 2.009                                                        | 3.085                          | 839.39             | 2589.48            | 6.197                          | 704.41             | 4365.24            |
| A_68_P21750311 | chr2:152460303-152460347                          | NM_009047:7581     | Rem1       | INSIDE                 | 1.536                                                        | 1.814                          | 1543.47            | 2799.99            | 2.787                          | 1315.22            | 3665.33            |
| A_68_P32465511 | chrX:71167531-71167575                            | NM_001164704:8637  | Renbp      | INSIDE                 | 3.621                                                        | 0.192                          | 1381.64            | 264.79             | 0.694                          | 1856.56            | 1288.37            |
| A_68_P24428221 | chr6:48547445-48547489                            | NM_001079901:3585  | Repin1     | INSIDE                 | 2.148                                                        | 1.780                          | 691.69             | 1231.51            | 3.824                          | 554.78             | 2121.41            |
| A_68_P24428220 | chr6:48547266-48547310                            | NM_001079901:3407  | Repin1     | INSIDE                 | 1.645                                                        | 1.685                          | 663.81             | 1118.38            | 2.771                          | 534.14             | 1480.00            |
| A_68_P26018119 | chr8:86618743-86618787                            | NM_009055:28030    | Rfx1       | INSIDE                 | 1.624                                                        | 1.389                          | 979.05             | 1359.71            | 2.255                          | 697.14             | 1572.22            |
| A_68_P20008184 | chr1:5009350-5009394                              | NM_021374:135      | Rgs20      | INSIDE                 | 1.824                                                        | 1.630                          | 429.72             | 700.65             | 2.974                          | 327.89             | 975.19             |
| A_68_P22393168 | chr3:104591684-104591728                          | NM_007484:-245     | Rhoc       | PROMOTER               | 2.088                                                        | 1.741                          | 3023.33            | 5263.26            | 3.635                          | 2294.56            | 8340.07            |
| A_68_P24061483 | chr5:124928214-124928258                          | NM_030259:8        | Rip12      | INSIDE                 | 1.526                                                        | 0.363                          | 1350.56            | 490.35             | 0.554                          | 1065.78            | 590.43             |
| A_68_P32322124 | chrX:34731543-34731587                            | NM_153503:227      | Rnf113a1   | INSIDE                 | 2.962                                                        | 0.512                          | 1233.97            | 632.16             | 1.518                          | 1646.58            | 2498.92            |
| A_68_P27278803 | chr10:79229502-79229546                           | NM_144528:142      | Rnf126     | INSIDE                 | 1.847                                                        | 0.279                          | 2767.60            | 771.27             | 0.515                          | 1817.83            | 935.64             |
| A_68_P20715106 | chr1:153347232-153347276                          | NM_011277:699      | Rfx1       | INSIDE                 | 1.624                                                        | 0.175                          | 4372.86            | 764.02             | 0.284                          | 3016.28            | 855.76             |
| A_68_P30513214 | chr16:5013320-5013364                             | NM_133185:304      | Rogdi      | INSIDE                 | 1.728                                                        | 0.251                          | 2249.34            | 563.58             | 0.433                          | 1525.30            | 660.29             |
| A_68_P29043020 | chr13:53381133-53381177                           | NM_013846:324      | Ror2       | INSIDE                 | 2.073                                                        | 0.233                          | 1983.66            | 461.48             | 0.482                          | 1614.55            | 778.74             |
| A_68_P31121831 | chr17:28465275-28465320                           | NM_011287:-118     | Rp110a     | PROMOTER               | 2.165                                                        | 7.985                          | 692.24             | 5527.91            | 17.290                         | 589.46             | 10192.03           |
| A_68_P32321655 | chrX:34625187-34625231                            | NM_026055:-29      | Rpl39      | PROMOTER               | 21.396                                                       | 0.085                          | 1013.99            | 86.41              | 1.823                          | 1556.92            | 2838.82            |
| A_68_P32773806 | chrX:155694082-155694126                          | NM_148945:53       | Rps6ka3    | INSIDE                 | 1.926                                                        | 0.244                          | 2420.69            | 589.55             | 0.469                          | 3876.93            | 1818.22            |
| A_68_P32773804 | chrX:155693758-155693802                          | NM_148945:-271     | Rps6ka3    | PROMOTER               | 1.882                                                        | 2.042                          | 3195.43            | 6523.51            | 3.843                          | 4290.60            | 16489.08           |
| A_68_P31936308 | chr19:6906036-6906086                             | NM_019924:9031     | Rps6ka4    | INSIDE                 | 2.654                                                        | 1.459                          | 1216.81            | 1775.48            | 3.873                          | 779.02             | 3017.13            |
| A_68_P20348983 | chr1:74552547-74552591                            | NM_021383:-65      | Rqcd1      | PROMOTER               | 1.514                                                        | 0.174                          | 2740.05            | 477.34             | 0.264                          | 1867.95            | 492.63             |
| A_68_P28956732 | chr13:37918318-37918362                           | NM_001177868:-440  | Rreb1      | PROMOTER               | 1.968                                                        | 0.192                          | 2689.39            | 517.44             | 0.379                          | 1794.61            | 679.43             |
| A_68_P24992504 | chr7:19878717-19878763                            | NM_001025364:2293  | Rtn2       | INSIDE                 | 1.710                                                        | 2.102                          | 784.71             | 1649.76            | 3.595                          | 597.71             | 2148.90            |
| A_68_P27924771 | chr11:75007879-75007923                           | NM_177708:406      | Rtn4r11    | INSIDE                 | 1.602                                                        | 0.271                          | 2789.24            | 755.49             | 0.434                          | 2280.03            | 989.42             |
| A_68_P29648696 | chr14:61791453-61791497                           | NM_172809:34181    | Sacs       | INSIDE                 | 1.557                                                        | 1.992                          | 836.79             | 1666.59            | 3.101                          | 725.41             | 2249.71            |
| A_68_P31257221 | chr17:56743113-56743157                           | NM_001163300:18730 | Safb       | INSIDE                 | 1.905                                                        | 1.514                          | 1938.43            | 2935.29            | 2.884                          | 1412.45            | 4074.11            |
| A_68_P31256956 | chr17:56705945-56705989                           | NM_001029979:18040 | Safb2      | INSIDE                 | 1.645                                                        | 1.951                          | 909.41             | 1774.22            | 3.210                          | 754.39             | 2421.77            |
| A_68_P21843350 | chr2:168581447-168581491                          | NM_175303:11233    | Sall4      | INSIDE                 | 1.543                                                        | 1.449                          | 1210.08            | 1753.35            | 2.235                          | 914.42             | 2043.79            |
| A_68_P21843327 | chr2:168578173-168578217                          | NM_175303:14507    | Sall4      | INSIDE                 | 1.599                                                        | 1.529                          | 583.90             | 892.75             | 2.445                          | 471.65             | 1153.34            |
| A_68_P21843351 | chr2:168581527-168581571                          | NM_175303:11153    | Sall4      | INSIDE                 | 1.674                                                        | 1.382                          | 1585.45            | 2190.77            | 2.313                          | 1173.46            | 2714.67            |
| A_68_P20250385 | chr1:57027773-57027817                            | NM_139146:384      | Satb2      | INSIDE                 | 2.570                                                        | 0.246                          | 2235.81            | 549.83             | 0.632                          | 1644.99            | 1039.49            |
| A_68_P25499766 | chr7:133435827-133435871                          | NM_145587:19716    | Sbk1       | INSIDE                 | 1.999                                                        | 2.022                          | 559.32             | 1130.85            | 4.042                          | 450.99             | 1822.70            |
| A_68_P25499767 | chr7:133435936-133435980                          | NM_145587:19826    | Sbk1       | INSIDE                 | 1.642                                                        | 2.270                          | 580.62             | 1318.11            | 3.729                          | 536.44             | 2000.20            |
| A_68_P25090603 | chr7:52263124-52263168                            | NM_001008422:8473  | Scaf1      | INSIDE                 | 1.773                                                        | 1.772                          | 837.70             | 1484.02            | 3.142                          | 678.79             | 2132.59            |
| A_68_P30348874 | chr15:76350196-76350240                           | NM_130893:2341     | Sert1      | INSIDE                 | 2.076                                                        | 0.131                          | 10867.94           | 1424.35            | 0.272                          | 6340.97            | 1725.64            |
| A_68_P31120666 | chr17:28279127-28279172                           | NM_001004366:-321  | Seube3     | PROMOTER               | 2.745                                                        | 0.571                          | 4769.03            | 2723.59            | 1.568                          | 2991.69            | 4690.23            |
| A_68_P23441761 | chr4:155367293-155367337                          | NM_011341:292      | Sfd4       | INSIDE                 | 1.571                                                        | 0.321                          | 1513.03            | 485.85             | 0.504                          | 1152.48            | 581.34             |
| A_68_P28164255 | chr11:117151945-117151989                         | NM_001113487:24407 | Septin9    | INSIDE                 | 1.782                                                        | 1.947                          | 363.47             | 707.70             | 3.471                          | 295.72             | 1026.33            |
| A_68_P32926577 | chr13:93380980-93381024                           | NM_172588:-90      | Serinc5    | PROMOTER               | 1.611                                                        | 0.158                          | 7100.57            | 1119.19            | 0.254                          | 5051.02            | 1282.79            |
| A_68_P27550645 | chr11:3093025-3093069                             | NM_030207:420      | Sfi1       | INSIDE                 | 1.895                                                        | 1.406                          | 3558.17            | 5003.50            | 2.665                          | 3254.57            | 8672.89            |
| A_68_P27550647 | chr11:3093206-3093251                             | NM_030207:238      | Sfi1       | INSIDE                 | 1.872                                                        | 1.403                          | 1094.27            | 1535.67            | 2.627                          | 929.28             | 2441.55            |
| A_68_P23283131 | chr4:126698502-126698546                          | NM_023603:-20      | Sfpq       | PROMOTER               | 1.599                                                        | 7.855                          | 272.36             | 2139.24            | 12.563                         | 196.30             | 2466.18            |
| A_68_P29047303 | chr13:54167121-54167165                           | NM_027324:-71      | Sfxn1      | PROMOTER               | 1.561                                                        | 2.052                          | 1709.35            | 3506.97            | 3.202                          | 1465.24            | 4691.95            |
| A_68_P32070012 | chr19:32462008-32462052                           | NM_144792:914      | Sgms1      | INSIDE                 | 1.688                                                        | 0.367                          | 2034.86            | 745.92             | 0.619                          | 1583.37            | 979.49             |
| A_68_P23594804 | chr5:34868325-34868369                            | NM_011893:-86      | Sh3bp2     | PROMOTER               | 2.525                                                        | 2.153                          | 1339.96            | 2885.60            | 5.438                          | 1184.98            | 6443.67            |

| ProbeName      | Target position of probe on CpG island microarray | TargetID            | GeneSymbol | CpG island Description | Ratio of relative methylation (TiO <sub>2</sub> -NP/Vehicle) | Sham group                     |                    |                    | TiO <sub>2</sub> -H group      |                    |                    |
|----------------|---------------------------------------------------|---------------------|------------|------------------------|--------------------------------------------------------------|--------------------------------|--------------------|--------------------|--------------------------------|--------------------|--------------------|
|                |                                                   |                     |            |                        |                                                              | Relative methylation (Cy5/Cy3) | Cy3 signal (Input) | Cy5 signal (MeDIP) | Relative methylation (Cy5/Cy3) | Cy3 signal (Input) | Cy5 signal (MeDIP) |
| A_68_P32149066 | chr19:47388501-47388545                           | NM_001164717:150379 | Sh3pxd2a   | INSIDE                 | 1.583                                                        | 0.333                          | 2750.14            | 915.69             | 0.527                          | 1718.01            | 905.35             |
| A_68_P23768851 | chr5:67999755-67999799                            | NM_001033415:655    | Shisa3     | INSIDE                 | 1.502                                                        | 0.275                          | 1881.37            | 517.27             | 0.413                          | 1478.53            | 610.77             |
| A_68_P27877796 | chr11:66340159-66340203                           | NM_001034874:-552   | Shisa6     | PROMOTER               | 1.831                                                        | 1.519                          | 1562.74            | 2373.39            | 2.780                          | 1295.79            | 3602.52            |
| A_68_P23896973 | chr5:93371964-93372008                            | NM_001077596:44963  | Shroom3    | INSIDE                 | 2.365                                                        | 2.100                          | 408.11             | 856.83             | 4.966                          | 332.56             | 1651.58            |
| A_68_P23896968 | chr5:93371161-93371205                            | NM_001077596:44159  | Shroom3    | INSIDE                 | 1.608                                                        | 1.917                          | 1053.60            | 2019.89            | 3.082                          | 826.42             | 2546.97            |
| A_68_P23896967 | chr5:93371085-93371129                            | NM_001077596:44083  | Shroom3    | INSIDE                 | 1.590                                                        | 1.563                          | 696.42             | 1088.74            | 2.485                          | 602.34             | 1496.86            |
| A_68_P32234209 | chrX:5977910-5977954                              | NM_001040459:670    | Shroom4    | INSIDE                 | 2.004                                                        | 0.343                          | 2044.80            | 701.11             | 0.687                          | 2663.69            | 1830.68            |
| A_68_P26540099 | chr9:56924722-56924766                            | NM_001110350:562    | Sin3a      | INSIDE                 | 1.584                                                        | 0.287                          | 1708.00            | 489.86             | 0.454                          | 1323.87            | 601.34             |
| A_68_P31844515 | chr18:77095020-77095064                           | NM_001109743:-101   | Skor2      | PROMOTER               | 1.508                                                        | 0.323                          | 1356.52            | 438.61             | 0.488                          | 1062.22            | 518.02             |
| A_68_P28187725 | chr11:120812339-120812383                         | NM_001038653:1980   | Slc16a3    | INSIDE                 | 1.647                                                        | 0.229                          | 2113.89            | 483.75             | 0.377                          | 1532.58            | 577.78             |
| A_68_P27630976 | chr11:20232710-20232754                           | NM_018861:-16       | Slc1a4     | PROMOTER               | 1.646                                                        | 0.327                          | 1958.54            | 640.30             | 0.538                          | 1457.79            | 784.40             |
| A_68_P21115505 | chr2:32306645-32306689                            | NM_001164357:324    | Slc25a25   | INSIDE                 | 1.502                                                        | 1.850                          | 878.89             | 1626.27            | 2.779                          | 652.53             | 1813.39            |
| A_68_P25957633 | chr8:74108592-74108640                            | NM_011977:15791     | Slc27a1    | INSIDE                 | 1.628                                                        | 1.543                          | 768.24             | 1185.18            | 2.512                          | 539.64             | 1355.69            |
| A_68_P32240694 | chrX:7461707-7461754                              | NM_001083937:361    | Slc35a2    | INSIDE                 | 12.416                                                       | 0.120                          | 941.20             | 113.40             | 1.496                          | 1263.13            | 1889.59            |
| A_68_P30467109 | chr15:96884897-96884941                           | NM_027052:1469      | Slc38a4    | INSIDE                 | 1.592                                                        | 1.712                          | 895.77             | 1533.73            | 2.725                          | 748.90             | 2040.91            |
| A_68_P27287001 | chr10:80494270-80494314                           | NM_134135:2365      | Slc39a3    | INSIDE                 | 1.630                                                        | 1.767                          | 862.94             | 1525.04            | 2.881                          | 622.02             | 1792.32            |
| A_68_P27286999 | chr10:80494095-80494139                           | NM_134135:2541      | Slc39a3    | INSIDE                 | 1.555                                                        | 2.055                          | 930.54             | 1912.41            | 3.196                          | 754.80             | 2412.12            |
| A_68_P27926647 | chr11:75344750-75344794                           | NM_001199284:-423   | Slc43a2    | PROMOTER               | 1.762                                                        | 0.159                          | 3975.62            | 633.93             | 0.281                          | 2785.27            | 782.43             |
| A_68_P28151695 | chr11:115024532-115024576                         | NM_012030:-100      | Slc9a3r1   | PROMOTER               | 1.671                                                        | 0.282                          | 1630.69            | 459.78             | 0.471                          | 1205.14            | 567.95             |
| A_68_P32427553 | chrX:61530261-61530305                            | NM_178740:-111      | Slitrk4    | PROMOTER               | 2.267                                                        | 0.619                          | 3195.79            | 1978.14            | 1.403                          | 4275.36            | 5998.39            |
| A_68_P31841966 | chr18:76400802-76400846                           | NM_010754:-754      | Smad2      | PROMOTER               | 1.641                                                        | 0.240                          | 2882.94            | 691.34             | 0.393                          | 2107.21            | 829.06             |
| A_68_P26578207 | chr9:63606312-63606356                            | NM_016769:-533      | Smad3      | PROMOTER               | 1.501                                                        | 0.280                          | 2870.02            | 804.38             | 0.421                          | 2141.43            | 900.73             |
| A_68_P31836532 | chr18:75527265-75527309                           | NM_001042660:268    | Smad7      | INSIDE                 | 1.839                                                        | 0.168                          | 3019.38            | 506.90             | 0.309                          | 2303.56            | 711.01             |
| A_68_P32182254 | chr19:53465262-53465306                           | NM_172429:-221      | Smdnd1     | PROMOTER               | 1.590                                                        | 0.206                          | 4922.77            | 1013.14            | 0.327                          | 3156.19            | 1032.49            |
| A_68_P21635426 | chr2:131346286-131346330                          | NM_001177833:28711  | Smox       | INSIDE                 | 1.550                                                        | 1.698                          | 659.66             | 1120.13            | 2.632                          | 448.43             | 1180.16            |
| A_68_P20022045 | chr1:9289343-9289387                              | NM_027671:447       | Sntg1      | INSIDE                 | 1.765                                                        | 3.599                          | 3399.54            | 12235.12           | 6.352                          | 2815.61            | 17886.00           |
| A_68_P26042148 | chr8:91151286-91151330                            | NM_027840:8719      | Snx20      | INSIDE                 | 1.599                                                        | 2.728                          | 217.07             | 592.28             | 4.363                          | 191.56             | 835.79             |
| A_68_P28050118 | chr11:97224447-97224491                           | NM_138657:604       | Soes7      | INSIDE                 | 1.511                                                        | 0.313                          | 1559.60            | 488.66             | 0.473                          | 1136.17            | 537.84             |
| A_68_P30964219 | chr16:91660394-91660440                           | NM_019973:12348     | Son        | INSIDE                 | 2.750                                                        | 1.459                          | 914.91             | 1334.67            | 4.011                          | 646.45             | 2593.12            |
| A_68_P21585133 | chr2:122060313-122060357                          | NM_146126:-240      | Sord       | PROMOTER               | 1.521                                                        | 0.373                          | 1837.63            | 684.78             | 0.567                          | 1449.10            | 821.49             |
| A_68_P32415800 | chrX:58145373-58145417                            | NM_009237:1211      | Sox3       | INSIDE                 | 1.865                                                        | 2.191                          | 259.66             | 568.79             | 4.086                          | 310.19             | 1267.33            |
| A_68_P28137854 | chr11:112646538-112646582                         | NM_011448:3037      | Sox9       | INSIDE                 | 1.615                                                        | 0.200                          | 15378.05           | 3070.87            | 0.323                          | 9983.62            | 3220.41            |
| A_68_P29509082 | chr14:31814863-31814907                           | NM_026911:-32       | Spes1      | PROMOTER               | 1.770                                                        | 4.059                          | 489.82             | 1988.26            | 7.185                          | 437.64             | 3144.61            |
| A_68_P31335035 | chr17:71901365-71901409                           | NM_001142631:-14    | Spdya      | PROMOTER               | 1.598                                                        | 1.774                          | 425.98             | 755.53             | 2.835                          | 324.11             | 918.71             |
| A_68_P23364326 | chr4:141034893-141034937                          | NM_019763:59598     | Spen       | INSIDE                 | 1.537                                                        | 1.574                          | 1020.25            | 1605.88            | 2.419                          | 800.35             | 1935.71            |
| A_68_P23364325 | chr4:141034764-141034809                          | NM_019763:59726     | Spen       | INSIDE                 | 1.641                                                        | 2.009                          | 298.14             | 598.94             | 3.297                          | 270.41             | 891.44             |
| A_68_P28159867 | chr11:116395295-116395339                         | NM_011451:-737      | Sphk1      | PROMOTER               | 1.598                                                        | 0.314                          | 2168.91            | 680.12             | 0.501                          | 1488.89            | 745.85             |
| A_68_P25094658 | chr7:52968623-52968667                            | NM_020011:1933      | Sphk2      | INSIDE                 | 1.554                                                        | 1.691                          | 643.79             | 1088.66            | 2.627                          | 518.03             | 1361.13            |
| A_68_P21866928 | chr2:172805309-172805353                          | NM_001083959:-12    | Spo11      | PROMOTER               | 2.015                                                        | 1.547                          | 582.53             | 901.17             | 3.117                          | 494.94             | 1542.80            |
| A_68_P26750366 | chr9:96896367-96896411                            | NM_145134:22386     | Spsb4      | INSIDE                 | 1.725                                                        | 1.856                          | 566.28             | 1051.28            | 3.202                          | 489.07             | 1566.15            |
| A_68_P28450915 | chr12:56256240-56256284                           | NM_011899:-64       | Srp54a     | PROMOTER               | 2.060                                                        | 0.293                          | 1566.37            | 459.68             | 0.604                          | 1133.80            | 685.33             |
| A_68_P31093844 | chr17:23956989-23957033                           | NM_175229:16857     | Srrm2      | INSIDE                 | 2.292                                                        | 1.378                          | 1318.88            | 1817.02            | 3.157                          | 811.12             | 2560.97            |
| A_68_P27997513 | chr11:87861967-87862012                           | NM_001078167:817    | Srsf1      | INSIDE                 | 17.221                                                       | 0.140                          | 648.36             | 90.54              | 2.405                          | 447.32             | 1075.72            |
| A_68_P30360709 | chr15:78370273-78370318                           | NM_009218:4480      | Sstr3      | INSIDE                 | 1.783                                                        | 1.666                          | 582.46             | 970.35             | 2.970                          | 447.44             | 1328.90            |
| A_68_P21116406 | chr2:32470512-32470556                            | NM_001025310:8054   | St6galnac6 | INSIDE                 | 1.731                                                        | 2.288                          | 358.67             | 820.74             | 3.961                          | 284.96             | 1128.59            |

| ProbeName      | Target position of probe on CpG island microarray | TargetID          | GeneSymbol | CpG island Description | Ratio of relative methylation (TiO <sub>2</sub> -NP/Vehicle) | Sham group                     |                    |                    | TiO <sub>2</sub> -H group      |                    |                    |
|----------------|---------------------------------------------------|-------------------|------------|------------------------|--------------------------------------------------------------|--------------------------------|--------------------|--------------------|--------------------------------|--------------------|--------------------|
|                |                                                   |                   |            |                        |                                                              | Relative methylation (Cy5/Cy3) | Cy3 signal (Input) | Cy5 signal (MeDIP) | Relative methylation (Cy5/Cy3) | Cy3 signal (Input) | Cy5 signal (MeDIP) |
| A_68_P27316752 | chr10:86371693-86371737                           | NM_138673:98973   | Stab2      | INSIDE                 | 2.122                                                        | 2.927                          | 9338.35            | 27331.90           | 6.211                          | 6520.23            | 40497.84           |
| A_68_P32341131 | chrX:39503134-39503178                            | NM_021465:-721    | Stag2      | PROMOTER               | 13.004                                                       | 0.178                          | 2207.41            | 393.97             | 2.321                          | 2820.54            | 6545.97            |
| A_68_P25950576 | chr8:72757876-72757920                            | NM_001168290:-226 | Sugg2      | PROMOTER               | 1.610                                                        | 0.309                          | 2012.33            | 621.99             | 0.498                          | 1348.88            | 671.26             |
| A_68_P32241634 | chrX:7651662-7651714                              | NM_011514:198     | Suv39h1    | INSIDE                 | 10.451                                                       | 0.239                          | 364.48             | 87.10              | 2.498                          | 517.22             | 1291.81            |
| A_68_P21890549 | chr2:178142357-178142402                          | NM_177191:-16     | Syp2       | PROMOTER               | 1.520                                                        | 2.826                          | 231.63             | 654.59             | 4.296                          | 230.14             | 988.75             |
| A_68_P28550370 | chr12:76919981-76920025                           | NM_001005510:698  | Syne2      | INSIDE                 | 1.740                                                        | 0.195                          | 2841.57            | 554.76             | 0.340                          | 2189.70            | 743.85             |
| A_68_P32239400 | chrX:7215668-7215712                              | NM_009305:-15     | Syp        | PROMOTER               | 2.608                                                        | 0.180                          | 5125.89            | 922.11             | 0.469                          | 5731.52            | 2688.86            |
| A_68_P28096909 | chr11:105451661-105451705                         | NM_181071:383     | Tanc2      | INSIDE                 | 1.546                                                        | 0.378                          | 1891.76            | 715.96             | 0.585                          | 1507.47            | 882.01             |
| A_68_P21682258 | chr2:139892550-139892594                          | NM_001159640:-51  | Tasp1      | PROMOTER               | 1.691                                                        | 0.358                          | 1664.46            | 596.21             | 0.606                          | 1402.58            | 849.45             |
| A_68_P28176530 | chr11:119072055-119072099                         | NM_172443:17737   | Tbc1d16    | INSIDE                 | 1.812                                                        | 12.586                         | 1786.95            | 22490.69           | 22.804                         | 1619.18            | 36924.48           |
| A_68_P21266388 | chr2:61643903-61643948                            | NM_009322:1416    | Tbr1       | INSIDE                 | 1.784                                                        | 0.355                          | 1982.06            | 703.06             | 0.633                          | 1308.33            | 827.97             |
| A_68_P27798408 | chr11:52096304-52096348                           | NM_009331:-574    | Tcf7       | PROMOTER               | 1.514                                                        | 1.363                          | 2891.10            | 3941.51            | 2.065                          | 2257.87            | 4661.79            |
| A_68_P20066646 | chr1:19204206-19204250                            | NM_001025305:2094 | Tcfap2b    | INSIDE                 | 1.766                                                        | 0.311                          | 4912.11            | 1525.68            | 0.548                          | 3553.92            | 1949.08            |
| A_68_P20552784 | chr1:120524752-120524796                          | NM_023755:253     | Tcfap211   | INSIDE                 | 1.656                                                        | 0.287                          | 2154.08            | 618.23             | 0.475                          | 1761.18            | 836.84             |
| A_68_P22336407 | chr3:93249382-93249426                            | NM_001163098:3153 | Tchh       | INSIDE                 | 2.254                                                        | 0.162                          | 2806.80            | 453.59             | 0.364                          | 2119.88            | 772.12             |
| A_68_P22336399 | chr3:93248419-93248463                            | NM_001163098:2189 | Tehh       | INSIDE                 | 1.547                                                        | 49.363                         | 1152.98            | 56914.80           | 76.343                         | 1409.58            | 107611.20          |
| A_68_P30379759 | chr15:81641797-81641841                           | NM_017376:-25     | Tef        | PROMOTER               | 1.521                                                        | 1.570                          | 413.49             | 649.22             | 2.388                          | 313.65             | 748.92             |
| A_68_P26504313 | chr9:50369450-50369494                            | NM_025687:-99     | Tex12      | DIVERGENT_PROMOTER     | 2.564                                                        | 1.670                          | 595.94             | 995.40             | 4.283                          | 497.92             | 2132.59            |
| A_68_P23991446 | chr5:112755370-112755414                          | NM_018783:4       | Tfip11     | INSIDE                 | 1.503                                                        | 0.238                          | 1951.80            | 463.90             | 0.357                          | 1333.45            | 476.26             |
| A_68_P25011335 | chr7:26473118-26473162                            | NM_011577:1120    | Tgfb1      | INSIDE                 | 1.719                                                        | 3.422                          | 493.96             | 1690.29            | 5.884                          | 412.39             | 2426.41            |
| A_68_P32340124 | chrX:39264668-39264712                            | NM_001033422:388  | Thoc2      | INSIDE                 | 5.531                                                        | 0.379                          | 789.49             | 299.23             | 2.096                          | 1208.76            | 2534.12            |
| A_68_P29049666 | chr13:54569805-54569849                           | NM_028597:375     | Thoc3      | INSIDE                 | 1.617                                                        | 2.235                          | 11703.62           | 26157.32           | 3.614                          | 6830.35            | 24686.83           |
| A_68_P30953523 | chr16:89885140-89885184                           | NM_009384:75910   | Tiam1      | INSIDE                 | 1.909                                                        | 1.563                          | 459.65             | 718.24             | 2.983                          | 319.79             | 953.89             |
| A_68_P27286214 | chr10:80363023-80363067                           | NM_013895:670     | Timm13     | INSIDE                 | 1.777                                                        | 0.239                          | 2267.77            | 540.95             | 0.424                          | 1599.29            | 677.80             |
| A_68_P32240782 | chrX:7476676-7476720                              | NM_011591:175     | Timm17b    | INSIDE                 | 2.030                                                        | 0.309                          | 1357.54            | 419.03             | 0.626                          | 1773.99            | 1111.37            |
| A_68_P27693351 | chr11:33102254-33102303                           | NM_019916:1310    | Tlx3       | INSIDE                 | 1.997                                                        | 1.851                          | 1352.30            | 2502.54            | 3.696                          | 734.82             | 2716.23            |
| A_68_P27567653 | chr11:6174835-6174879                             | NM_134020:-16     | Tmed4      | PROMOTER               | 1.665                                                        | 0.110                          | 5812.34            | 641.98             | 0.184                          | 4030.60            | 741.25             |
| A_68_P20218129 | chr1:50984521-50984565                            | NM_019790:176     | Tmeff2     | INSIDE                 | 1.788                                                        | 0.328                          | 2119.57            | 694.49             | 0.586                          | 1600.50            | 937.73             |
| A_68_P23590340 | chr5:34000396-34000440                            | NM_026698:63      | Tmem129    | INSIDE                 | 1.506                                                        | 0.268                          | 1998.42            | 535.52             | 0.404                          | 1330.61            | 536.91             |
| A_68_P31926782 | chr19:5082847-5082891                             | NM_001001885:2609 | Tmem151a   | INSIDE                 | 1.970                                                        | 2.443                          | 698.39             | 1706.27            | 4.812                          | 594.37             | 2860.14            |
| A_68_P32709179 | chrX:139116571-139116615                          | NM_001199360:324  | Tmem164    | INSIDE                 | 5.083                                                        | 0.468                          | 2513.19            | 1176.81            | 2.380                          | 3268.80            | 7779.73            |
| A_68_P21070914 | chr2:25111268-25111312                            | NM_177344:332     | Tmem203    | INSIDE                 | 1.743                                                        | 0.151                          | 3164.81            | 478.67             | 0.264                          | 2143.55            | 565.17             |
| A_68_P32488665 | chrX:78316348-78316392                            | NM_138751:388     | Tmem47     | INSIDE                 | 1.604                                                        | 0.254                          | 2353.73            | 597.05             | 0.407                          | 3251.49            | 1322.72            |
| A_68_P23523160 | chr5:20388333-20388392                            | NM_177601:92      | Tmem60     | INSIDE                 | 2.231                                                        | 1.509                          | 541.80             | 817.53             | 3.366                          | 338.81             | 1140.40            |
| A_68_P25102684 | chr7:54305881-54305925                            | NM_026436:-107    | Tmem86a    | PROMOTER               | 1.869                                                        | 1.527                          | 543.73             | 830.13             | 2.853                          | 554.78             | 1582.91            |
| A_68_P27340413 | chr10:90634459-90634503                           | NM_001080129:-153 | Tmpo       | PROMOTER               | 1.883                                                        | 0.314                          | 1872.50            | 588.32             | 0.592                          | 1528.15            | 904.17             |
| A_68_P30484944 | chr15:100111219-100111263                         | NM_183109:-27     | Tmprss12   | PROMOTER               | 1.650                                                        | 2.002                          | 494.51             | 989.99             | 3.304                          | 430.45             | 1422.16            |
| A_68_P30484946 | chr15:100111437-100111481                         | NM_183109:191     | Tmprss12   | INSIDE                 | 1.619                                                        | 1.739                          | 1151.96            | 2003.20            | 2.815                          | 938.91             | 2642.65            |
| A_68_P21652098 | chr2:134469794-134469838                          | NM_029148:41      | Tmx4       | INSIDE                 | 1.554                                                        | 0.379                          | 1662.61            | 629.68             | 0.588                          | 1179.99            | 694.37             |
| A_68_P22015879 | chr3:28162505-28162549                            | NM_001163009:391  | Tnik       | INSIDE                 | 1.526                                                        | 0.327                          | 1429.22            | 467.12             | 0.499                          | 1024.73            | 511.09             |
| A_68_P30380080 | chr15:81690283-81690327                           | NM_020507:-1548   | Tob2       | PROMOTER               | 1.543                                                        | 0.302                          | 2348.56            | 709.08             | 0.466                          | 1709.12            | 796.35             |
| A_68_P29428730 | chr14:17197854-17197898                           | NM_009409:157     | Top2b      | INSIDE                 | 2.689                                                        | 0.183                          | 2298.70            | 420.51             | 0.492                          | 1847.83            | 908.83             |
| A_68_P28470051 | chr12:60162088-60162132                           | NM_030057:338     | Trappc6b   | INSIDE                 | 1.608                                                        | 0.221                          | 3539.41            | 780.78             | 0.355                          | 2721.52            | 965.22             |
| A_68_P24974188 | chr7:13609447-13609491                            | NM_011588:-32     | Trim28     | PROMOTER               | 1.799                                                        | 7.313                          | 835.47             | 6109.48            | 13.158                         | 753.92             | 9919.86            |
| A_68_P22372025 | chr3:100726540-100726584                          | NM_001165953:147  | Trim45     | INSIDE                 | 3.751                                                        | 0.092                          | 5529.70            | 508.00             | 0.345                          | 3495.54            | 1204.59            |

| ProbeName      | Target position of probe on CpG island microarray | TargetID            | GeneSymbol | CpG island Description | Ratio of relative methylation (TiO <sub>2</sub> -NP/Vehicle) | Sham group                     |                    |                    | TiO <sub>2</sub> -H group      |                    |                    |
|----------------|---------------------------------------------------|---------------------|------------|------------------------|--------------------------------------------------------------|--------------------------------|--------------------|--------------------|--------------------------------|--------------------|--------------------|
|                |                                                   |                     |            |                        |                                                              | Relative methylation (Cy5/Cy3) | Cy3 signal (Input) | Cy5 signal (MeDIP) | Relative methylation (Cy5/Cy3) | Cy3 signal (Input) | Cy5 signal (MeDIP) |
| A_68_P28157433 | chr11:115971055-115971099                         | NM_001205081:473    | Trim47     | INSIDE                 | 1.725                                                        | 5.091                          | 5170.14            | 26322.32           | 8.782                          | 3817.22            | 33524.51           |
| A_68_P29880580 | chr14:106505493-106505537                         | NM_198601:100       | Trim52     | INSIDE                 | 1.755                                                        | 2.108                          | 518.00             | 1092.14            | 3.700                          | 395.37             | 1462.87            |
| A_68_P29880583 | chr14:106505860-106505904                         | NM_198601:468       | Trim52     | INSIDE                 | 1.709                                                        | 2.239                          | 287.69             | 644.21             | 3.828                          | 221.37             | 847.33             |
| A_68_P26247733 | chr8:127317798-127317842                          | NM_198632:902       | Trim67     | INSIDE                 | 1.504                                                        | 0.233                          | 3066.14            | 714.57             | 0.351                          | 2096.77            | 735.01             |
| A_68_P30094306 | chr15:27677312-27677364                           | NM_001081302:278265 | Trio       | INSIDE                 | 1.502                                                        | 2.243                          | 997.20             | 2236.39            | 3.369                          | 801.14             | 2698.99            |
| A_68_P31260730 | chr17:57388800-57388844                           | NM_134125:-51       | Trip10     | DIVERGENT_PROMOTER     | 1.631                                                        | 0.256                          | 3650.49            | 934.72             | 0.418                          | 2504.21            | 1046.13            |
| A_68_P20405966 | chr1:84835679-84835723                            | NM_133975:179       | Trip12     | INSIDE                 | 1.580                                                        | 0.338                          | 2282.17            | 772.45             | 0.535                          | 1822.84            | 974.98             |
| A_68_P22059401 | chr3:36570355-36570399                            | NM_019510:18713     | Trpc3      | INSIDE                 | 1.700                                                        | 1.747                          | 840.14             | 1467.61            | 2.970                          | 787.56             | 2338.68            |
| A_68_P25092433 | chr7:52582778-52582822                            | NM_175130:6350      | Trpm4      | INSIDE                 | 1.554                                                        | 2.236                          | 1288.18            | 2880.47            | 3.474                          | 996.52             | 3462.35            |
| A_68_P32700072 | chrX:137134843-137134887                          | NM_001077364:197    | Tsc2d3     | INSIDE                 | 3.226                                                        | 3.164                          | 1997.35            | 6319.86            | 10.209                         | 2177.27            | 22226.92           |
| A_68_P25355269 | chr7:105509376-105509420                          | NM_001024619:400    | Tsku       | INSIDE                 | 1.548                                                        | 0.145                          | 4000.65            | 581.14             | 0.225                          | 2564.41            | 576.78             |
| A_68_P23982393 | chr5:111308521-111308565                          | NM_024477:-279      | Ttc28      | PROMOTER               | 1.902                                                        | 3.194                          | 198.86             | 635.17             | 6.075                          | 172.72             | 1049.32            |
| A_68_P23982395 | chr5:111308888-111308932                          | NM_024477:89        | Ttc28      | INSIDE                 | 1.694                                                        | 2.668                          | 340.56             | 908.75             | 4.521                          | 237.19             | 1072.43            |
| A_68_P23984844 | chr5:111706164-111706208                          | NM_024477:397365    | Ttc28      | INSIDE                 | 1.770                                                        | 1.542                          | 1479.85            | 2281.56            | 2.729                          | 1118.60            | 3052.93            |
| A_68_P23984176 | chr5:111612120-111612164                          | NM_024477:303321    | Ttc28      | INSIDE                 | 1.695                                                        | 1.505                          | 1079.85            | 1624.98            | 2.551                          | 796.72             | 2032.28            |
| A_68_P30388853 | chr15:83341230-83341274                           | NM_178869:85        | Ttll1      | INSIDE                 | 1.671                                                        | 0.332                          | 1781.62            | 590.68             | 0.554                          | 1213.30            | 672.35             |
| A_68_P32791140 | chrX:159267555-159267599                          | NM_178935:-245      | Txlng      | PROMOTER               | 2.343                                                        | 0.241                          | 1253.80            | 302.40             | 0.565                          | 1704.19            | 963.03             |
| A_68_P32791135 | chrX:159266933-159266977                          | NM_178935:377       | Txlng      | INSIDE                 | 2.261                                                        | 0.628                          | 2796.29            | 1755.34            | 1.420                          | 3526.59            | 5006.40            |
| A_68_P30356632 | chr15:77759535-77759579                           | NM_019913:-132      | Txn2       | PROMOTER               | 2.219                                                        | 0.114                          | 4801.38            | 548.13             | 0.253                          | 3063.19            | 776.05             |
| A_68_P28159934 | chr11:116403055-116403099                         | NM_173755:39685     | Ube2o      | INSIDE                 | 1.561                                                        | 3.072                          | 1274.06            | 3913.69            | 4.794                          | 978.30             | 4690.02            |
| A_68_P22314483 | chr3:88357962-88358006                            | NM_033526:347       | Ubqln4     | INSIDE                 | 1.671                                                        | 1.563                          | 4922.57            | 7695.81            | 2.612                          | 3964.44            | 10354.34           |
| A_68_P30651947 | chr16:32333125-32333169                           | NM_177633:809       | Ubxn7      | INSIDE                 | 1.633                                                        | 2.079                          | 455.69             | 947.25             | 3.395                          | 349.78             | 1187.46            |
| A_68_P25958124 | chr8:74184428-74184472                            | NM_001029873:11206  | Unc13a     | INSIDE                 | 1.621                                                        | 0.164                          | 3754.13            | 614.72             | 0.265                          | 2588.49            | 687.20             |
| A_68_P22584284 | chr3:141128445-141128489                          | NM_009472:-61       | Unc5c      | PROMOTER               | 1.551                                                        | 0.255                          | 2975.85            | 758.83             | 0.395                          | 1961.62            | 775.69             |
| A_68_P27564657 | chr11:5617071-5617115                             | NM_178623:24087     | Urgp       | INSIDE                 | 2.355                                                        | 2.436                          | 705.57             | 1718.85            | 5.737                          | 499.08             | 2863.32            |
| A_68_P32289745 | chrX:20281291-20281340                            | NM_145628:281       | Usp11      | INSIDE                 | 27.746                                                       | 0.147                          | 585.44             | 85.89              | 4.071                          | 955.71             | 3890.55            |
| A_68_P32289747 | chrX:20281555-20281599                            | NM_145628:542       | Usp11      | INSIDE                 | 3.597                                                        | 0.193                          | 1625.82            | 314.34             | 0.696                          | 2294.48            | 1595.85            |
| A_68_P32289746 | chrX:20281381-20281426                            | NM_145628:369       | Usp11      | INSIDE                 | 11.256                                                       | 0.505                          | 675.37             | 341.38             | 5.689                          | 884.13             | 5030.22            |
| A_68_P27356011 | chr10:93308901-93308948                           | NM_183199:14625     | Usp44      | INSIDE                 | 1.536                                                        | 2.412                          | 499.45             | 1204.85            | 3.704                          | 426.66             | 1580.55            |
| A_68_P27356009 | chr10:93308576-93308623                           | NM_183199:14300     | Usp44      | INSIDE                 | 1.827                                                        | 1.592                          | 529.10             | 842.17             | 2.909                          | 453.10             | 1317.95            |
| A_68_P32363782 | chrX:45639057-45639101                            | NM_028276:28968     | Usp14a     | DOWNSTREAM             | 3.521                                                        | 0.176                          | 1319.61            | 232.35             | 0.620                          | 1763.97            | 1093.58            |
| A_68_P21017270 | chr2:13496599-13496643                            | NM_011701:683       | Vim        | INSIDE                 | 1.621                                                        | 0.082                          | 6678.46            | 550.72             | 0.134                          | 4542.28            | 607.33             |
| A_68_P21568844 | chr2:119119741-119119785                          | NM_172269:5285      | Vps18      | INSIDE                 | 1.805                                                        | 2.271                          | 503.93             | 1144.60            | 4.099                          | 423.20             | 1734.62            |
| A_68_P25075289 | chr7:48157966-48158010                            | NM_021387:3341      | Vstm2b     | INSIDE                 | 1.899                                                        | 0.287                          | 1707.59            | 489.65             | 0.545                          | 1239.87            | 675.27             |
| A_68_P31140216 | chr17:31649029-31649073                           | NM_021322:382       | Wdr4       | INSIDE                 | 1.916                                                        | 0.277                          | 1615.37            | 446.67             | 0.530                          | 1152.78            | 610.77             |
| A_68_P27947945 | chr11:79068066-79068110                           | NM_019653:109       | Wsb1       | INSIDE                 | 1.574                                                        | 0.314                          | 1771.06            | 556.97             | 0.495                          | 1263.90            | 625.78             |
| A_68_P32340722 | chrX:39421221-39421265                            | NM_009688:230       | Xiap       | INSIDE                 | 3.424                                                        | 0.695                          | 1431.58            | 994.36             | 2.378                          | 1849.87            | 4399.72            |
| A_68_P20002774 | chr1:366219-3662163                               | NM_001011874:-561   | Xkr4       | PROMOTER               | 1.549                                                        | 0.370                          | 2511.88            | 930.49             | 0.574                          | 1903.13            | 1091.73            |
| A_68_P29703312 | chr14:71166447-71166491                           | NM_023045:-33       | Xpo7       | DIVERGENT_PROMOTER     | 2.005                                                        | 2.141                          | 476.78             | 1020.60            | 4.291                          | 423.92             | 1819.16            |
| A_68_P24118492 | chr5:136387366-136387410                          | NM_018871:23123     | Ywhag      | INSIDE                 | 1.517                                                        | 1.841                          | 684.51             | 1259.91            | 2.792                          | 570.54             | 1593.10            |
| A_68_P24118629 | chr5:136410508-136410552                          | NM_018871:-19       | Ywhag      | PROMOTER               | 1.555                                                        | 1.573                          | 1243.73            | 1956.40            | 2.446                          | 1088.59            | 2662.76            |
| A_68_P23364203 | chr4:141020484-141020528                          | NM_009541:19919     | Zbtb17     | INSIDE                 | 2.058                                                        | 1.590                          | 789.70             | 1255.95            | 3.272                          | 619.89             | 2028.53            |
| A_68_P28553587 | chr12:77469901-77469960                           | NM_001172104:521    | Zbtb25     | INSIDE                 | 1.894                                                        | 1.822                          | 365.41             | 665.81             | 3.450                          | 245.61             | 847.38             |
| A_68_P31841472 | chr18:76305759-76305803                           | NM_145356:325949    | Zbtb7c     | INSIDE                 | 1.650                                                        | 1.498                          | 831.82             | 1246.11            | 2.472                          | 691.68             | 1709.80            |
| A_68_P32542578 | chrX:92907030-92907074                            | NM_001034907:36     | Zc3h12b    | INSIDE                 | 1.685                                                        | 1.411                          | 1150.99            | 1624.49            | 2.379                          | 1422.01            | 3382.68            |

| ProbeName      | Target position of probe on CpG island microarray | TargetID           | GeneSymbol | CpG island Description | Ratio of relative methylation (TiO <sub>2</sub> -NP/Vehicle) | Sham group                     |                    |                    | TiO <sub>2</sub> -H group      |                    |                    |
|----------------|---------------------------------------------------|--------------------|------------|------------------------|--------------------------------------------------------------|--------------------------------|--------------------|--------------------|--------------------------------|--------------------|--------------------|
|                |                                                   |                    |            |                        |                                                              | Relative methylation (Cy5/Cy3) | Cy3 signal (Input) | Cy5 signal (MeDIP) | Relative methylation (Cy5/Cy3) | Cy3 signal (Input) | Cy5 signal (MeDIP) |
| A_68_P21394205 | chr2:84554801-84554845                            | NM_144887:499      | Zdhhc5     | INSIDE                 | 1.812                                                        | 0.267                          | 2885.30            | 770.98             | 0.484                          | 2065.95            | 1000.18            |
| A_68_P21394211 | chr2:84555629-84555673                            | NM_144887:329      | Zdhhc5     | PROMOTER               | 1.618                                                        | 0.133                          | 4957.00            | 658.84             | 0.215                          | 3396.61            | 730.59             |
| A_68_P29616218 | chr14:55710458-55710502                           | NM_001039198:405   | Zfxh2      | INSIDE                 | 1.533                                                        | 0.389                          | 2644.87            | 1028.06            | 0.596                          | 2164.12            | 1289.75            |
| A_68_P26153173 | chr8:111324170-111324214                          | NM_007496:85649    | Zfxh3      | INSIDE                 | 1.551                                                        | 2.009                          | 632.58             | 1270.69            | 3.116                          | 445.30             | 1387.73            |
| A_68_P25029686 | chr7:30836414-30836458                            | NM_011748:-21      | Zfp14      | PROMOTER               | 1.721                                                        | 0.324                          | 2527.42            | 818.75             | 0.558                          | 1723.15            | 960.79             |
| A_68_P31092362 | chr17:23694847-23694891                           | NM_001033496:6325  | Zfp213     | INSIDE                 | 1.729                                                        | 1.803                          | 713.38             | 1286.19            | 3.118                          | 601.25             | 1874.66            |
| A_68_P32462127 | chrX:70588115-70588159                            | NM_001160229:177   | Zfp275     | INSIDE                 | 8.456                                                        | 0.519                          | 2966.77            | 1538.49            | 4.385                          | 3385.03            | 14843.76           |
| A_68_P24424840 | chr6:47855086-47855130                            | NM_146175:27555    | Zfp282     | INSIDE                 | 1.625                                                        | 1.496                          | 923.18             | 1381.37            | 2.432                          | 720.93             | 1753.37            |
| A_68_P24155795 | chr5:144031809-144031857                          | NM_017467:-131     | Zfp316     | PROMOTER               | 1.660                                                        | 0.329                          | 1913.01            | 630.08             | 0.547                          | 1443.98            | 789.70             |
| A_68_P24973912 | chr7:13556599-13556643                            | NM_178732:5408     | Zfp324     | INSIDE                 | 2.378                                                        | 1.721                          | 736.15             | 1267.14            | 4.093                          | 587.18             | 2403.51            |
| A_68_P24973913 | chr7:13556719-13556763                            | NM_178732:5528     | Zfp324     | INSIDE                 | 1.565                                                        | 1.604                          | 533.79             | 856.25             | 2.511                          | 400.72             | 1006.01            |
| A_68_P25614226 | chr8:3495954-3495998                              | NM_080461:2839     | Zfp358     | INSIDE                 | 1.971                                                        | 2.538                          | 517.85             | 1314.41            | 5.003                          | 404.01             | 2021.19            |
| A_68_P25614227 | chr8:3496122-3496166                              | NM_080461:3007     | Zfp358     | INSIDE                 | 1.721                                                        | 2.260                          | 486.82             | 1100.25            | 3.890                          | 447.45             | 1740.49            |
| A_68_P25614229 | chr8:3496319-3496363                              | NM_080461:3203     | Zfp358     | INSIDE                 | 1.516                                                        | 1.676                          | 1376.54            | 2306.53            | 2.540                          | 1074.47            | 2729.19            |
| A_68_P29455881 | chr14:22805841-22805885                           | NM_145459:2961     | Zfp503     | INSIDE                 | 1.513                                                        | 0.347                          | 1498.64            | 519.66             | 0.525                          | 1110.85            | 582.74             |
| A_68_P31879113 | chr18:83078968-83079012                           | NM_183033:-1280    | Zfp516     | PROMOTER               | 1.503                                                        | 0.335                          | 7196.37            | 2414.20            | 0.504                          | 4540.73            | 2289.47            |
| A_68_P31879481 | chr18:83126670-83126714                           | NM_001177464:42669 | Zfp516     | INSIDE                 | 1.781                                                        | 1.623                          | 1174.94            | 1906.40            | 2.889                          | 905.86             | 2617.09            |
| A_68_P25506496 | chr7:134754584-134754628                          | NM_177226:3341     | Zfp629     | INSIDE                 | 1.839                                                        | 2.172                          | 607.26             | 1318.89            | 3.994                          | 438.16             | 1749.85            |
| A_68_P30351141 | chr15:76741990-76742034                           | NM_001168276:13866 | Zfp647     | INSIDE                 | 1.607                                                        | 2.385                          | 350.58             | 836.06             | 3.831                          | 309.61             | 1186.20            |
| A_68_P30351140 | chr15:76741911-76741955                           | NM_001168276:13946 | Zfp647     | INSIDE                 | 1.561                                                        | 2.963                          | 993.98             | 2945.01            | 4.626                          | 782.11             | 3618.19            |
| A_68_P30351139 | chr15:76741794-76741838                           | NM_001168276:14062 | Zfp647     | INSIDE                 | 1.822                                                        | 1.629                          | 833.74             | 1358.50            | 2.968                          | 654.49             | 1942.66            |
| A_68_P30351142 | chr15:76742082-76742126                           | NM_001168276:13774 | Zfp647     | INSIDE                 | 1.603                                                        | 1.493                          | 752.04             | 1122.60            | 2.393                          | 600.17             | 1436.20            |
| A_68_P26885415 | chr9:121672022-121672066                          | NM_001166644:2894  | Zfp651     | INSIDE                 | 1.872                                                        | 2.020                          | 462.48             | 934.42             | 3.782                          | 345.42             | 1306.30            |
| A_68_P26350330 | chr9:21875518-21875562                            | NM_177318:249      | Zfp653     | INSIDE                 | 1.538                                                        | 0.384                          | 1654.20            | 635.45             | 0.591                          | 1180.45            | 697.20             |
| A_68_P24954799 | chr7:6238258-6238302                              | NM_001024928:99    | Zfp667     | INSIDE                 | 2.041                                                        | 0.248                          | 3830.73            | 948.82             | 0.506                          | 2759.75            | 1395.27            |
| A_68_P25505622 | chr7:134587895-134587939                          | NM_175163:4756     | Zfp689     | INSIDE                 | 1.674                                                        | 2.210                          | 702.77             | 1552.86            | 3.698                          | 587.12             | 2171.29            |
| A_68_P25505623 | chr7:134587980-134588024                          | NM_175163:4670     | Zfp689     | INSIDE                 | 1.538                                                        | 5.898                          | 1196.95            | 7060.06            | 9.071                          | 1019.62            | 9248.95            |
| A_68_P32603686 | chrX:109714974-109715018                          | NM_177747:862      | Zfp711     | INSIDE                 | 1.564                                                        | 1.966                          | 220.76             | 433.99             | 3.074                          | 313.10             | 962.39             |
| A_68_P29109187 | chr13:67653829-67653873                           | NM_001035231:238   | Zfp748     | INSIDE                 | 1.538                                                        | 0.304                          | 1694.03            | 514.77             | 0.467                          | 1325.27            | 619.47             |
| A_68_P25505248 | chr7:134486671-134486730                          | NM_146202:2128     | Zfp768     | INSIDE                 | 2.019                                                        | 2.895                          | 246.64             | 713.95             | 5.843                          | 173.77             | 1015.44            |
| A_68_P24428351 | chr6:48570207-48570251                            | NM_173429:7050     | Zfp775     | INSIDE                 | 2.012                                                        | 1.780                          | 864.07             | 1538.00            | 3.581                          | 728.59             | 2609.17            |
| A_68_P24428350 | chr6:48570111-48570155                            | NM_173429:6954     | Zfp775     | INSIDE                 | 1.549                                                        | 1.999                          | 1323.59            | 2646.24            | 3.098                          | 983.15             | 3045.57            |
| A_68_P24428347 | chr6:48569751-48569795                            | NM_173429:6594     | Zfp775     | INSIDE                 | 1.528                                                        | 1.728                          | 709.09             | 1225.03            | 2.640                          | 595.89             | 1573.25            |
| A_68_P24428352 | chr6:48570342-48570386                            | NM_173429:7186     | Zfp775     | INSIDE                 | 2.204                                                        | 1.796                          | 319.13             | 573.30             | 3.959                          | 296.38             | 1173.33            |
| A_68_P24954141 | chr7:6084325-6084369                              | NM_001013012:23227 | Zfp787     | INSIDE                 | 1.652                                                        | 1.816                          | 707.21             | 1284.10            | 2.999                          | 635.80             | 1906.85            |
| A_68_P24951677 | chr7:4982359-4982403                              | NM_001033383:10403 | Zfp865     | INSIDE                 | 1.711                                                        | 1.571                          | 765.01             | 1202.04            | 2.688                          | 647.70             | 1740.82            |
| A_68_P32462526 | chrX:70667546-70667590                            | NM_009566:11127    | Zfp92      | INSIDE                 | 1.543                                                        | 1.420                          | 939.56             | 1333.78            | 2.190                          | 1156.79            | 2533.90            |
| A_68_P32403906 | chrX:55284045-55284104                            | NM_009575:270      | Zic3       | INSIDE                 | 9.281                                                        | 0.334                          | 328.10             | 109.52             | 3.098                          | 667.60             | 2068.30            |
| A_68_P23195055 | chr4:107890802-107890861                          | NM_001167936:-304  | Zygl1a     | PROMOTER               | 1.750                                                        | 1.967                          | 828.18             | 1628.84            | 3.443                          | 646.09             | 2224.34            |
| A_68_P24397783 | chr6:42299752-42299796                            | NM_011777:-52      | Zyx        | PROMOTER               | 2.065                                                        | 0.117                          | 4896.28            | 575.25             | 0.243                          | 3371.39            | 817.83             |
