# Supplementary material for: Effects of Prenatal Exposure to Titanium Dioxide Nanoparticles on DNA Methylation and Gene Expression Profile in the Mouse Brain
Source: PubMed Central journal article supplement (PMC8915839; doi:10.3389/ftox.2021.705910), 2021-10-08
Supplement: Table5.pdf [file Table5.pdf]

**Supplementary Table 5. The genes of which DNA methylation were decreased in the brain of male offspring prenatally exposed to TiO<sub>2</sub>-NP.**

| ProbeName      | Target position of probe on CpG island microarray | TargetID          | GeneSymbol    | CpG island Description | Ratio of relative methylation (TiO <sub>2</sub> -NP/Vehicle) | Sham group                     |                    |                    | TiO <sub>2</sub> -H group      |                    |                    |
|----------------|---------------------------------------------------|-------------------|---------------|------------------------|--------------------------------------------------------------|--------------------------------|--------------------|--------------------|--------------------------------|--------------------|--------------------|
|                |                                                   |                   |               |                        |                                                              | Relative methylation (Cy5/Cy3) | Cy3 signal (Input) | Cy5 signal (MeDIP) | Relative methylation (Cy5/Cy3) | Cy3 signal (Input) | Cy5 signal (MeDIP) |
| A_68_P28202486 | chr12:4824316-4824360                             | NM_025323:-75     | 0610009D07Rik | PROMOTER               | 0.194                                                        | 30.849                         | 4345.01            | 134037.00          | 5.998                          | 4690.56            | 28133.42           |
| A_68_P28183963 | chr11:120210170-120210214                         | NR_038126:201     | 0610009L18Rik | INSIDE                 | 0.286                                                        | 10.257                         | 1957.16            | 20075.58           | 2.93                           | 1664.96            | 4878.35            |
| A_68_P28183962 | chr11:120210037-120210081                         | NR_038126:67      | 0610009L18Rik | INSIDE                 | 0.357                                                        | 12.507                         | 1042.64            | 13040.35           | 4.46                           | 872.94             | 3893.35            |
| A_68_P28183976 | chr11:120211624-120211668                         | NR_038126:1655    | 0610009L18Rik | INSIDE                 | 0.459                                                        | 4.213                          | 759.02             | 3198.10            | 1.933                          | 736.97             | 1424.87            |
| A_68_P31632917 | chr18:38409964-38410008                           | NM_024179:84      | 0610009O20Rik | INSIDE                 | 0.585                                                        | 0.665                          | 998.00             | 663.38             | 0.389                          | 806.15             | 313.32             |
| A_68_P27646748 | chr11:23533451-23533495                           | NM_027860:159     | 0610010F05Rik | INSIDE                 | 0.579                                                        | 3.450                          | 1143.05            | 3943.71            | 1.999                          | 1097.41            | 2193.82            |
| A_68_P24541220 | chr6:72297774-72297818                            | NM_026696:486     | 0610030E20Rik | INSIDE                 | 0.401                                                        | 9.074                          | 2910.04            | 26405.39           | 3.638                          | 3060.46            | 11134.97           |
| A_68_P25983693 | chr8:80041310-80041354                            | NR_028125:378     | 0610038B21Rik | INSIDE                 | 0.414                                                        | 4.347                          | 867.42             | 3770.70            | 1.8                            | 792.80             | 1427.02            |
| A_68_P21813623 | chr2:163470481-163470525                          | NR_028113:-83     | 0610039K10Rik | PROMOTER               | 0.149                                                        | 34.144                         | 2768.32            | 94520.13           | 5.087                          | 2519.52            | 12816.52           |
| A_68_P23747544 | chr5:64203539-64203583                            | NM_029554:-173    | 0610040U1Rik  | PROMOTER               | 0.429                                                        | 0.222                          | 2355.00            | 522.49             | 0.095                          | 1814.85            | 172.60             |
| A_68_P28448911 | chr12:55757483-55757527                           | NM_134054:55      | 1110002B05Rik | INSIDE                 | 0.424                                                        | 0.657                          | 1011.93            | 664.68             | 0.279                          | 814.02             | 226.76             |
| A_68_P23756666 | chr5:65884517-65884566                            | NM_133697:-467    | 1110003E01Rik | PROMOTER               | 0.471                                                        | 0.327                          | 1893.78            | 618.40             | 0.154                          | 1187.46            | 182.61             |
| A_68_P23756659 | chr5:65883667-65883711                            | NM_133697:386     | 1110003E01Rik | INSIDE                 | 0.513                                                        | 3.773                          | 7363.84            | 27782.82           | 1.936                          | 6129.78            | 11867.10           |
| A_68_P23756665 | chr5:65884378-65884423                            | NM_133697:-326    | 1110003E01Rik | PROMOTER               | 0.626                                                        | 0.398                          | 1498.43            | 597.02             | 0.25                           | 1102.24            | 275.13             |
| A_68_P30959868 | chr16:90934441-90934485                           | NM_026502:632     | 1110004E09Rik | INSIDE                 | 0.356                                                        | 0.395                          | 1630.36            | 643.25             | 0.14                           | 1266.69            | 177.69             |
| A_68_P30959877 | chr16:90935364-90935408                           | NM_026502:-292    | 1110004E09Rik | PROMOTER               | 0.548                                                        | 0.633                          | 908.27             | 574.95             | 0.347                          | 758.12             | 262.84             |
| A_68_P24010682 | chr5:116081413-116081457                          | NR_027810:391     | 1110006O24Rik | INSIDE                 | 0.258                                                        | 0.434                          | 1934.84            | 840.08             | 0.112                          | 1562.92            | 174.87             |
| A_68_P24010683 | chr5:116081567-116081611                          | NR_027810:237     | 1110006O24Rik | INSIDE                 | 0.651                                                        | 0.328                          | 4497.75            | 1474.33            | 0.213                          | 3249.13            | 693.26             |
| A_68_P21773774 | chr2:156688896-156688940                          | NM_026124:61      | 1110008F13Rik | INSIDE                 | 0.518                                                        | 4.608                          | 1813.99            | 8358.92            | 2.387                          | 1553.94            | 3709.73            |
| A_68_P24039805 | chr5:121062634-121062678                          | NM_029096:-58     | 1110008J03Rik | DIVERGENT_PROMOTER     | 0.556                                                        | 5.831                          | 5847.48            | 34095.75           | 3.244                          | 4414.24            | 14319.76           |
| A_68_P21115067 | chr2:32237497-32237541                            | NM_198001:-83     | 1110008P14Rik | PROMOTER               | 0.376                                                        | 0.210                          | 3224.53            | 677.23             | 0.079                          | 2537.37            | 200.31             |
| A_68_P21115064 | chr2:32237153-32237197                            | NM_198001:261     | 1110008P14Rik | INSIDE                 | 0.418                                                        | 0.600                          | 6050.65            | 3632.15            | 0.251                          | 3981.36            | 999.84             |
| A_68_P31306319 | chr17:66798578-66798622                           | NM_001114098:490  | 1110012J17Rik | INSIDE                 | 0.456                                                        | 26.673                         | 7609.88            | 202978.10          | 12.163                         | 6479.32            | 78807.70           |
| A_68_P31306312 | chr17:66797737-66797781                           | NM_001114098:1332 | 1110012J17Rik | INSIDE                 | 0.435                                                        | 0.602                          | 845.92             | 508.88             | 0.262                          | 653.11             | 170.82             |
| A_68_P22862528 | chr4:41454176-41454220                            | NM_028624:599     | 1110017D15Rik | INSIDE                 | 0.556                                                        | 0.568                          | 1571.60            | 892.16             | 0.316                          | 1255.20            | 396.27             |
| A_68_P28601430 | chr12:86311556-86311600                           | NM_178065:258     | 1110018G07Rik | INSIDE                 | 0.197                                                        | 0.624                          | 2887.79            | 1802.31            | 0.123                          | 2093.69            | 257.76             |
| A_68_P31129448 | chr17:29854041-29854085                           | NM_001163741:-100 | 1110021J02Rik | PROMOTER               | 0.587                                                        | 0.294                          | 4726.84            | 1387.38            | 0.172                          | 3320.11            | 571.86             |
| A_68_P22217918 | chr3:68673912-68673956                            | NM_001167996:427  | 1110032F04Rik | INSIDE                 | 0.386                                                        | 7.990                          | 1163.42            | 9295.48            | 3.086                          | 1154.29            | 3562.44            |
| A_68_P22217916 | chr3:68673757-68673801                            | NM_001167996:271  | 1110032F04Rik | INSIDE                 | 0.41                                                         | 5.336                          | 815.44             | 4351.37            | 2.186                          | 663.38             | 1450.29            |
| A_68_P22217922 | chr3:68674470-68674514                            | NM_001167996:985  | 1110032F04Rik | INSIDE                 | 0.542                                                        | 2.878                          | 3998.19            | 11508.41           | 1.559                          | 2930.54            | 4570.02            |
| A_68_P28513315 | chr12:70299066-70299110                           | NM_027269:328     | 1110034A24Rik | INSIDE                 | 0.37                                                         | 6.077                          | 4884.17            | 29680.61           | 2.248                          | 3762.15            | 8458.90            |
| A_68_P21641570 | chr2:132512792-132512837                          | NM_028637:-3204   | 1110034G24Rik | PROMOTER               | 0.301                                                        | 15.223                         | 4818.55            | 73351.83           | 4.577                          | 3847.17            | 17606.91           |
| A_68_P22729893 | chr4:11413533-11413577                            | NM_001081183:450  | 1110037F02Rik | INSIDE                 | 0.276                                                        | 6.517                          | 970.25             | 6323.49            | 1.797                          | 857.74             | 1541.03            |
| A_68_P31156690 | chr17:35089452-35089496                           | NR_015536:-58     | 1110038B12Rik | PROMOTER               | 0.293                                                        | 0.599                          | 1225.91            | 733.76             | 0.175                          | 1004.41            | 176.05             |
| A_68_P27256913 | chr10:74979851-74979895                           | NM_175133:195     | 1110038D17Rik | INSIDE                 | 0.462                                                        | 0.432                          | 1079.90            | 466.89             | 0.2                            | 862.78             | 172.39             |
| A_68_P30351330 | chr15:76779157-76779201                           | NM_054099:205     | 1110038F14Rik | INSIDE                 | 0.442                                                        | 0.359                          | 1314.07            | 471.63             | 0.159                          | 1059.92            | 168.24             |
| A_68_P23331577 | chr4:135543069-135543113                          | NM_025411:69      | 1110049F12Rik | INSIDE                 | 0.489                                                        | 6.608                          | 1639.39            | 10833.00           | 3.233                          | 1350.56            | 4365.97            |
| A_68_P30608335 | chr16:24393852-24393896                           | NR_037954:-133    | 1110054M08Rik | PROMOTER               | 0.326                                                        | 8.225                          | 991.31             | 8153.48            | 2.685                          | 863.39             | 2318.07            |
| A_68_P20091076 | chr1:24012273-24012317                            | NM_026503:185     | 1110058L19Rik | INSIDE                 | 0.651                                                        | 2.787                          | 1541.98            | 4297.77            | 1.814                          | 1372.47            | 2489.53            |
| A_68_P26892246 | chr9:122859846-122859890                          | NM_025419:250     | 1110059G10Rik | INSIDE                 | 0.222                                                        | 0.420                          | 2221.99            | 932.80             | 0.093                          | 1853.53            | 172.98             |
| A_68_P27633577 | chr11:20730971-20731015                           | NM_173752:119     | 1110067D22Rik | INSIDE                 | 0.508                                                        | 12.703                         | 1821.76            | 23142.07           | 6.458                          | 1627.61            | 10510.42           |
| A_68_P27633579 | chr11:20731282-20731326                           | NM_173752:-193    | 1110067D22Rik | PROMOTER               | 0.436                                                        | 1.438                          | 2270.48            | 3265.75            | 0.628                          | 1767.72            | 1109.74            |
| A_68_P24864304 | chr6:134878874-134878918                          | NR_037955:-213    | 1190002F15Rik | PROMOTER               | 0.407                                                        | 7.599                          | 1059.36            | 8050.56            | 3.091                          | 938.46             | 2900.89            |
| A_68_P29750657 | chr14:79700949-79700993                           | NM_025427:472     | 1190002H23Rik | INSIDE                 | 0.329                                                        | 9.353                          | 1471.31            | 13760.77           | 3.08                           | 1226.26            | 3776.80            |

| ProbeName      | Target position of probe on CpG island microarray | TargetID          | GeneSymbol    | CpG island Description | Ratio of relative methylation (TiO <sub>2</sub> -NP/Vehicle) | Sham group                     |                    |                    | TiO <sub>2</sub> -H group      |                    |                    |
|----------------|---------------------------------------------------|-------------------|---------------|------------------------|--------------------------------------------------------------|--------------------------------|--------------------|--------------------|--------------------------------|--------------------|--------------------|
|                |                                                   |                   |               |                        |                                                              | Relative methylation (Cy5/Cy3) | Cy3 signal (Input) | Cy5 signal (MeDIP) | Relative methylation (Cy5/Cy3) | Cy3 signal (Input) | Cy5 signal (MeDIP) |
| A_68_P29750659 | chr14:79701095-79701139                           | NM_025427:326     | 1190002H23Rik | INSIDE                 | 0.479                                                        | 0.408                          | 1178.97            | 480.49             | 0.195                          | 895.35             | 174.64             |
| A_68_P29750664 | chr14:79701683-79701729                           | NM_025427:-264    | 1190002H23Rik | PROMOTER               | 0.281                                                        | 0.706                          | 1092.22            | 770.97             | 0.198                          | 866.56             | 171.81             |
| A_68_P26736551 | chr9:94438921-94438965                            | NM_001033145:-442 | 1190002N15Rik | PROMOTER               | 0.596                                                        | 0.337                          | 2054.17            | 691.75             | 0.201                          | 1665.12            | 334.40             |
| A_68_P28744002 | chr12:112664074-112664118                         | NM_028807:8456    | 120000906Rik  | INSIDE                 | 0.47                                                         | 0.338                          | 1923.82            | 651.03             | 0.159                          | 1370.11            | 217.70             |
| A_68_P27992496 | chr11:86900314-86900358                           | NM_024262:-57     | 1200011M11Rik | PROMOTER               | 0.164                                                        | 1.967                          | 1545.21            | 3039.85            | 0.322                          | 1045.01            | 336.57             |
| A_68_P27992495 | chr11:86900155-86900199                           | NM_024262:103     | 1200011M11Rik | INSIDE                 | 0.501                                                        | 0.271                          | 1666.52            | 451.07             | 0.136                          | 1331.02            | 180.66             |
| A_68_P27992494 | chr11:86900082-86900126                           | NM_024262:175     | 1200011M11Rik | INSIDE                 | 0.554                                                        | 0.418                          | 3825.67            | 1600.32            | 0.232                          | 2934.20            | 679.50             |
| A_68_P27914868 | chr11:72861634-72861678                           | NM_025818:288     | 1200014J11Rik | INSIDE                 | 0.543                                                        | 5.432                          | 3787.43            | 20574.37           | 2.951                          | 2889.51            | 8527.38            |
| A_68_P27914870 | chr11:72861801-72861845                           | NM_025818:454     | 1200014J11Rik | INSIDE                 | 0.619                                                        | 0.599                          | 5663.69            | 3391.66            | 0.371                          | 4153.41            | 1539.71            |
| A_68_P20714680 | chr1:153275146-153275191                          | NM_025819:397     | 1200016B10Rik | INSIDE                 | 0.473                                                        | 0.539                          | 875.23             | 471.58             | 0.255                          | 664.25             | 169.32             |
| A_68_P27921681 | chr11:74462947-74462991                           | NM_001081158:-28  | 1300001101Rik | PROMOTER               | 0.154                                                        | 29.396                         | 3898.41            | 114598.20          | 4.517                          | 3283.04            | 14829.53           |
| A_68_P27921682 | chr11:74463075-74463119                           | NM_001081158:100  | 1300001101Rik | INSIDE                 | 0.431                                                        | 5.632                          | 669.01             | 3767.55            | 2.427                          | 641.03             | 1555.85            |
| A_68_P30594370 | chr16:21794748-21794792                           | NR_037957:351     | 1300002E11Rik | INSIDE                 | 0.666                                                        | 2.957                          | 2528.25            | 7475.71            | 1.968                          | 1968.59            | 3874.60            |
| A_68_P28939817 | chr13:34744234-34744278                           | NM_025831:294     | 130001406Rik  | INSIDE                 | 0.257                                                        | 7.868                          | 981.00             | 7718.28            | 2.021                          | 853.07             | 1724.07            |
| A_68_P28939820 | chr13:34744543-34744587                           | NM_025831:-14     | 130001406Rik  | PROMOTER               | 0.203                                                        | 2.698                          | 1642.41            | 4431.42            | 0.547                          | 1270.95            | 695.30             |
| A_68_P30423043 | chr15:88919652-88919696                           | NM_027905:138     | 1300018J18Rik | INSIDE                 | 0.65                                                         | 3.950                          | 455.50             | 1799.11            | 2.566                          | 366.19             | 939.54             |
| A_68_P21570237 | chr2:119373578-119373622                          | NM_019769:158     | 1500003O03Rik | INSIDE                 | 0.313                                                        | 0.575                          | 1046.40            | 601.31             | 0.18                           | 926.15             | 166.53             |
| A_68_P24006302 | chr5:115263981-115264025                          | NR_027817:-17     | 1500011B03Rik | PROMOTER               | 0.636                                                        | 2.862                          | 1898.64            | 5433.68            | 1.821                          | 1623.19            | 2956.13            |
| A_68_P24050005 | chr5:122821860-122821904                          | NM_026883:90      | 1500011H22Rik | INSIDE                 | 0.279                                                        | 9.471                          | 784.43             | 7429.49            | 2.647                          | 689.68             | 1825.57            |
| A_68_P27978000 | chr11:84339607-84339651                           | NR_038057:467     | 1500016L03Rik | INSIDE                 | 0.601                                                        | 0.232                          | 2071.76            | 481.17             | 0.14                           | 1449.49            | 202.40             |
| A_68_P30650943 | chr16:32099956-32100000                           | NM_025892:91      | 1500031L02Rik | INSIDE                 | 0.197                                                        | 18.429                         | 5104.00            | 94062.43           | 3.639                          | 6669.33            | 24270.56           |
| A_68_P30382916 | chr15:82176692-82176736                           | NM_026914:239     | 1500032L24Rik | INSIDE                 | 0.46                                                         | 0.444                          | 1335.03            | 592.62             | 0.204                          | 1034.05            | 211.11             |
| A_68_P30382914 | chr15:82176511-82176555                           | NM_026914:57      | 1500032L24Rik | INSIDE                 | 0.566                                                        | 6.779                          | 1556.58            | 10552.79           | 3.837                          | 1642.11            | 6301.31            |
| A_68_P23227948 | chr4:115816884-115816928                          | NM_026547:315     | 1520402A15Rik | INSIDE                 | 0.203                                                        | 2.357                          | 10138.15           | 23900.42           | 0.477                          | 6084.00            | 2905.06            |
| A_68_P23227949 | chr4:115817024-115817068                          | NM_026547:175     | 1520402A15Rik | INSIDE                 | 0.581                                                        | 4.077                          | 1648.04            | 6719.08            | 2.368                          | 1451.31            | 3436.82            |
| A_68_P28854603 | chr13:18085252-18085296                           | NM_025904:-89     | 1600012F09Rik | PROMOTER               | 0.455                                                        | 0.277                          | 1654.74            | 457.58             | 0.126                          | 1405.43            | 176.67             |
| A_68_P31062777 | chr17:15080325-15080369                           | NM_001083880:158  | 1600012H06Rik | INSIDE                 | 0.596                                                        | 0.427                          | 2709.19            | 1158.11            | 0.255                          | 1946.47            | 495.60             |
| A_68_P25065735 | chr7:38968873-38968917                            | NM_028166:89      | 1600014C10Rik | INSIDE                 | 0.227                                                        | 0.703                          | 1257.15            | 883.95             | 0.16                           | 1096.50            | 175.13             |
| A_68_P20134295 | chr1:33727422-33727466                            | NR_033199:776     | 1700001G17Rik | INSIDE                 | 0.357                                                        | 16.898                         | 1973.09            | 33342.06           | 6.028                          | 2620.31            | 15795.01           |
| A_68_P30387964 | chr15:83197665-83197709                           | NR_027980:41      | 1700001L05Rik | INSIDE                 | 0.177                                                        | 20.888                         | 6039.30            | 126147.60          | 3.691                          | 5018.42            | 18523.24           |
| A_68_P30387961 | chr15:83197374-83197418                           | NR_027980:331     | 1700001L05Rik | INSIDE                 | 0.552                                                        | 0.625                          | 1384.72            | 865.50             | 0.345                          | 982.79             | 339.35             |
| A_68_P30387965 | chr15:83197791-83197835                           | NR_027980:-85     | 1700001L05Rik | PROMOTER               | 0.111                                                        | 13.812                         | 9916.06            | 136955.80          | 1.536                          | 8741.50            | 13424.33           |
| A_68_P21105302 | chr2:30656577-30656621                            | NM_198000:629     | 1700001O22Rik | INSIDE                 | 0.049                                                        | 2.400                          | 16309.30           | 39149.87           | 0.118                          | 9296.62            | 1100.14            |
| A_68_P21105309 | chr2:30657215-30657259                            | NM_198000:-9      | 1700001O22Rik | PROMOTER               | 0.179                                                        | 16.635                         | 1063.74            | 17694.78           | 2.986                          | 911.58             | 2721.87            |
| A_68_P21105304 | chr2:30656752-30656796                            | NM_198000:453     | 1700001O22Rik | INSIDE                 | 0.406                                                        | 1.784                          | 3581.12            | 6389.04            | 0.724                          | 2656.75            | 1924.62            |
| A_68_P24591798 | chr6:83112430-83112474                            | NM_027948:6055    | 1700003E16Rik | INSIDE                 | 0.163                                                        | 2.471                          | 1132.77            | 2799.19            | 0.402                          | 954.78             | 383.48             |
| A_68_P30425032 | chr15:89240650-89240694                           | NM_001162882:22   | 1700007E06Rik | INSIDE                 | 0.547                                                        | 4.860                          | 782.80             | 3804.53            | 2.657                          | 652.90             | 1734.57            |
| A_68_P25505910 | chr7:134655663-134655707                          | NR_024331:699     | 1700008J07Rik | INSIDE                 | 0.616                                                        | 0.565                          | 1316.77            | 744.41             | 0.348                          | 1010.59            | 351.99             |
| A_68_P25505914 | chr7:134656178-134656222                          | NR_024331:183     | 1700008J07Rik | INSIDE                 | 0.298                                                        | 5.047                          | 2832.12            | 14293.18           | 1.505                          | 2106.59            | 3169.73            |
| A_68_P25417173 | chr7:118266112-118266156                          | NR_015573:55      | 1700012D14Rik | INSIDE                 | 0.494                                                        | 0.295                          | 1851.69            | 546.18             | 0.146                          | 1545.50            | 225.13             |
| A_68_P25417171 | chr7:118265837-118265882                          | NR_015573:330     | 1700012D14Rik | INSIDE                 | 0.602                                                        | 0.597                          | 802.97             | 479.32             | 0.359                          | 683.60             | 245.57             |
| A_68_P26541141 | chr9:57109407-57109451                            | NM_028820:978     | 1700017B05Rik | INSIDE                 | 0.187                                                        | 23.006                         | 2144.01            | 49326.08           | 4.292                          | 2591.02            | 11121.93           |
| A_68_P26541149 | chr9:57110346-57110390                            | NM_028820:38      | 1700017B05Rik | INSIDE                 | 0.387                                                        | 0.732                          | 1835.08            | 1342.99            | 0.283                          | 1465.31            | 414.60             |
| A_68_P31675575 | chr18:46358675-46358719                           | NM_001145259:22   | 1700018A14Rik | INSIDE                 | 0.371                                                        | 0.317                          | 1934.15            | 613.27             | 0.118                          | 1562.49            | 183.62             |
| A_68_P32050808 | chr19:29122130-29122174                           | NR_028360:180     | 1700018L02Rik | INSIDE                 | 0.51                                                         | 5.313                          | 3914.63            | 20798.10           | 2.709                          | 3298.43            | 8936.49            |
| A_68_P25614132 | chr8:3475942-3475986                              | NM_029598:5103    | 1700019B03Rik | INSIDE                 | 0.413                                                        | 1.386                          | 2067.59            | 2864.74            | 0.572                          | 1516.63            | 867.40             |

| ProbeName      | Target position of probe on CpG island microarray | TargetID           | GeneSymbol     | CpG island Description | Ratio of relative methylation (TiO <sub>2</sub> -NP/Vehicle) | Sham group                     |                    |                    | TiO <sub>2</sub> -H group      |                    |                    |
|----------------|---------------------------------------------------|--------------------|----------------|------------------------|--------------------------------------------------------------|--------------------------------|--------------------|--------------------|--------------------------------|--------------------|--------------------|
|                |                                                   |                    |                |                        |                                                              | Relative methylation (Cy5/Cy3) | Cy3 signal (Input) | Cy5 signal (MeDIP) | Relative methylation (Cy5/Cy3) | Cy3 signal (Input) | Cy5 signal (MeDIP) |
| A_68_P25614137 | chr8:3476402-3476449                              | NM_029598:5564     | 1700019B03Rik  | INSIDE                 | 0.174                                                        | 2.024                          | 896.33             | 1814.61            | 0.353                          | 566.52             | 200.07             |
| A_68_P27971504 | chr11:83254254-83254300                           | NM_025492:3081     | 1700020L24Rik  | INSIDE                 | 0.555                                                        | 4.999                          | 650.46             | 3251.60            | 2.776                          | 526.58             | 1461.99            |
| A_68_P27971499 | chr11:83253762-83253806                           | NM_025492:2589     | 1700020L24Rik  | INSIDE                 | 0.478                                                        | 6.828                          | 290.28             | 1981.90            | 3.264                          | 276.55             | 902.59             |
| A_68_P30654978 | chr16:32868216-32868260                           | NM_001200038:214   | 1700021K19Rik  | INSIDE                 | 0.207                                                        | 1.680                          | 1709.66            | 2871.99            | 0.348                          | 1370.23            | 477.36             |
| A_68_P23819410 | chr5:77445261-77445305                            | NM_027970:235      | 1700023E05Rik  | INSIDE                 | 0.568                                                        | 0.673                          | 2804.38            | 1887.59            | 0.382                          | 2086.16            | 797.57             |
| A_68_P23819409 | chr5:77445107-77445151                            | NM_027970:81       | 1700023E05Rik  | INSIDE                 | 0.535                                                        | 3.324                          | 1990.00            | 6614.67            | 1.78                           | 1361.90            | 2423.64            |
| A_68_P20416260 | chr1:89083300-89083344                            | NM_027084:3255     | 1700027L20Rik  | INSIDE                 | 0.596                                                        | 0.580                          | 1266.99            | 735.23             | 0.346                          | 1051.67            | 363.66             |
| A_68_P27293828 | chr10:82274680-82274724                           | NR_038042:-165     | 1700028I16Rik  | PROMOTER               | 0.15                                                         | 3.685                          | 7845.96            | 28910.56           | 0.553                          | 5741.98            | 3175.49            |
| A_68_P27293831 | chr10:82275065-82275109                           | NR_038042:219      | 1700028I16Rik  | INSIDE                 | 0.221                                                        | 29.432                         | 8056.09            | 237108.70          | 6.501                          | 8354.28            | 54314.52           |
| A_68_P30380760 | chr15:81810911-81810955                           | NM_025503:-37      | 1700029P11Rik  | PROMOTER               | 0.092                                                        | 19.606                         | 3615.43            | 70885.72           | 1.807                          | 2719.96            | 4915.06            |
| A_68_P26200045 | chr8:119502947-119502991                          | NM_027103:-125     | 1700030J22Rik  | PROMOTER               | 0.48                                                         | 0.501                          | 1039.64            | 520.39             | 0.24                           | 911.95             | 219.23             |
| A_68_P26200040 | chr8:119502568-119502612                          | NM_027103:253      | 1700030J22Rik  | INSIDE                 | 0.654                                                        | 0.407                          | 7301.24            | 2970.77            | 0.266                          | 5203.87            | 1384.21            |
| A_68_P21633595 | chr2:130985938-130985982                          | NM_026091:-204     | 1700037H04Rik  | PROMOTER               | 0.438                                                        | 0.445                          | 1603.16            | 713.12             | 0.195                          | 1015.66            | 198.04             |
| A_68_P28450733 | chr12:56225550-56225594                           | NM_001100116:58    | 1700047I17Rik2 | INSIDE                 | 0.37                                                         | 11.626                         | 1090.26            | 12675.10           | 4.301                          | 1152.32            | 4956.32            |
| A_68_P28450734 | chr12:56225622-56225666                           | NM_001100116:130   | 1700047I17Rik2 | INSIDE                 | 0.466                                                        | 10.524                         | 2218.84            | 23350.41           | 4.908                          | 1919.28            | 9419.67            |
| A_68_P28450732 | chr12:56225370-56225414                           | NM_001100116:-122  | 1700047I17Rik2 | PROMOTER               | 0.465                                                        | 0.707                          | 2077.48            | 1468.48            | 0.328                          | 1804.92            | 592.76             |
| A_68_P25019420 | chr7:28714464-28714508                            | NM_028538:-37      | 1700049G17Rik  | PROMOTER               | 0.581                                                        | 0.378                          | 1213.43            | 459.19             | 0.22                           | 1119.45            | 246.16             |
| A_68_P28094671 | chr11:105042686-105042730                         | NR_027956:39       | 1700052K11Rik  | INSIDE                 | 0.377                                                        | 9.879                          | 801.94             | 7922.32            | 3.721                          | 760.76             | 2830.50            |
| A_68_P20893089 | chr1:185857699-185857743                          | NM_028516:157      | 1700056E22Rik  | INSIDE                 | 0.625                                                        | 5.991                          | 2528.06            | 15146.67           | 3.743                          | 2101.24            | 7865.66            |
| A_68_P31215872 | chr17:48232748-48232792                           | NM_026625:6189     | 1700067P10Rik  | DOWNSTREAM             | 0.626                                                        | 0.465                          | 1623.00            | 754.18             | 0.291                          | 1300.31            | 377.96             |
| A_68_P21101977 | chr2:30093187-30093231                            | NR_028299:-57      | 1700084E18Rik  | DIVERGENT_PROMOTER     | 0.556                                                        | 3.830                          | 3149.01            | 12061.76           | 2.129                          | 2537.23            | 5401.17            |
| A_68_P31632918 | chr18:38410055-38410099                           | NR_027904:143      | 1700086O06Rik  | INSIDE                 | 0.354                                                        | 0.490                          | 1210.38            | 592.72             | 0.173                          | 990.79             | 171.56             |
| A_68_P29456087 | chr14:22838983-22839027                           | NM_028275:71       | 1700112E06Rik  | INSIDE                 | 0.365                                                        | 0.596                          | 1014.37            | 604.89             | 0.218                          | 805.48             | 175.55             |
| A_68_P27317705 | chr10:86521172-86521216                           | NM_029685:404      | 1700113H08Rik  | INSIDE                 | 0.254                                                        | 0.325                          | 2885.94            | 936.62             | 0.082                          | 2059.53            | 169.69             |
| A_68_P28073808 | chr11:101286925-101286969                         | NM_026865:-299     | 1700113I22Rik  | PROMOTER               | 0.657                                                        | 0.284                          | 3416.50            | 971.91             | 0.187                          | 2515.23            | 470.42             |
| A_68_P23296885 | chr4:129168578-129168622                          | NM_001085491:167   | 1700125D06Rik  | INSIDE                 | 0.438                                                        | 7.590                          | 2220.92            | 16856.92           | 3.322                          | 1952.75            | 6486.96            |
| A_68_P23296944 | chr4:129178242-129178286                          | NM_001085491:9831  | 1700125D06Rik  | DOWNSTREAM             | 0.597                                                        | 4.257                          | 2313.22            | 9846.30            | 2.543                          | 1868.00            | 4749.57            |
| A_68_P23296941 | chr4:129177909-129177953                          | NM_001085491:9497  | 1700125D06Rik  | DOWNSTREAM             | 0.659                                                        | 3.388                          | 1098.70            | 3722.07            | 2.231                          | 964.03             | 2150.60            |
| A_68_P23296888 | chr4:129168839-129168883                          | NM_001085491:427   | 1700125D06Rik  | INSIDE                 | 0.33                                                         | 1.569                          | 4570.27            | 7169.62            | 0.518                          | 3594.00            | 1862.72            |
| A_68_P27268621 | chr10:76978260-76978304                           | NM_133998:276      | 1810008A18Rik  | INSIDE                 | 0.484                                                        | 0.564                          | 4639.09            | 2617.68            | 0.273                          | 3093.62            | 844.69             |
| A_68_P27268624 | chr10:76978491-76978535                           | NM_133998:46       | 1810008A18Rik  | INSIDE                 | 0.657                                                        | 0.705                          | 1600.06            | 1128.55            | 0.463                          | 1166.57            | 540.55             |
| A_68_P28104781 | chr11:106889949-106889993                         | NM_001163473:434   | 1810010H24Rik  | INSIDE                 | 0.378                                                        | 8.705                          | 968.01             | 8426.23            | 3.287                          | 768.23             | 2524.97            |
| A_68_P27945542 | chr11:78639981-78640025                           | NM_001076681:-94   | 1810012P15Rik  | PROMOTER               | 0.496                                                        | 3.589                          | 2432.27            | 8729.11            | 1.782                          | 2212.82            | 3942.25            |
| A_68_P27945543 | chr11:78640074-78640118                           | NM_001076681:0     | 1810012P15Rik  | INSIDE                 | 0.66                                                         | 0.388                          | 1610.19            | 624.70             | 0.256                          | 1487.44            | 380.79             |
| A_68_P21957616 | chr3:14611261-14611305                            | NM_001099674:-26   | 1810022K09Rik  | PROMOTER               | 0.317                                                        | 0.130                          | 6802.79            | 884.21             | 0.041                          | 4138.46            | 170.74             |
| A_68_P21957615 | chr3:14611165-14611209                            | NM_001099674:70    | 1810022K09Rik  | INSIDE                 | 0.57                                                         | 0.273                          | 8581.80            | 2342.50            | 0.155                          | 5465.88            | 849.92             |
| A_68_P27897438 | chr11:69651419-69651463                           | NM_026982:-586     | 1810027O10Rik  | DIVERGENT_PROMOTER     | 0.417                                                        | 0.184                          | 3374.83            | 622.28             | 0.077                          | 2247.79            | 173.00             |
| A_68_P25933301 | chr8:69010356-69010400                            | NM_025465:28       | 1810029B16Rik  | INSIDE                 | 0.269                                                        | 0.252                          | 3957.52            | 995.44             | 0.068                          | 2598.36            | 175.91             |
| A_68_P20352244 | chr1:75139021-75139065                            | NM_026977:-100     | 1810031K17Rik  | DIVERGENT_PROMOTER     | 0.567                                                        | 0.695                          | 3557.16            | 2473.23            | 0.394                          | 2452.36            | 966.18             |
| A_68_P30394811 | chr15:84276781-84276825                           | NM_001163145:725   | 1810041L15Rik  | INSIDE                 | 0.188                                                        | 18.256                         | 1889.93            | 34502.31           | 3.428                          | 1664.40            | 5705.73            |
| A_68_P30394506 | chr15:84236917-84236961                           | NM_001163145:40589 | 1810041L15Rik  | INSIDE                 | 0.626                                                        | 2.481                          | 1544.15            | 3830.82            | 1.553                          | 1297.94            | 2015.54            |
| A_68_P28182351 | chr11:119960438-119960482                         | NM_001110242:213   | 1810043H04Rik  | INSIDE                 | 0.458                                                        | 0.277                          | 1780.01            | 492.66             | 0.127                          | 1344.35            | 170.45             |
| A_68_P28182350 | chr11:119960353-119960397                         | NM_001110242:127   | 1810043H04Rik  | INSIDE                 | 0.61                                                         | 0.365                          | 3175.94            | 1158.47            | 0.222                          | 2120.74            | 471.57             |
| A_68_P28532686 | chr12:73637244-73637288                           | NM_026327:-77      | 1810048J11Rik  | PROMOTER               | 0.553                                                        | 0.638                          | 1734.89            | 1106.10            | 0.352                          | 1332.40            | 469.52             |
| A_68_P31918868 | chr19:3708036-3708080                             | NM_028077:-274     | 1810055G02Rik  | PROMOTER               | 0.48                                                         | 0.480                          | 1640.65            | 787.44             | 0.23                           | 1430.61            | 329.44             |
| A_68_P31918872 | chr19:3708434-3708478                             | NM_028077:124      | 1810055G02Rik  | INSIDE                 | 0.593                                                        | 0.415                          | 1365.78            | 566.12             | 0.246                          | 1155.75            | 284.23             |

| ProbeName      | Target position of probe on CpG island microarray | TargetID         | GeneSymbol    | CpG island Description | Ratio of relative methylation (TiO <sub>2</sub> -NP/Vehicle) | Sham group                     |                    |                    | TiO <sub>2</sub> -H group      |                    |                    |
|----------------|---------------------------------------------------|------------------|---------------|------------------------|--------------------------------------------------------------|--------------------------------|--------------------|--------------------|--------------------------------|--------------------|--------------------|
|                |                                                   |                  |               |                        |                                                              | Relative methylation (Cy5/Cy3) | Cy3 signal (Input) | Cy5 signal (MeDIP) | Relative methylation (Cy5/Cy3) | Cy3 signal (Input) | Cy5 signal (MeDIP) |
| A_68_P22789805 | chr4:25208818-25208862                            | NM_026194:128    | 1810074P20Rik | INSIDE                 | 0.519                                                        | 0.574                          | 1506.18            | 864.53             | 0.298                          | 1244.22            | 370.94             |
| A_68_P22789806 | chr4:25208898-25208942                            | NM_026194:48     | 1810074P20Rik | INSIDE                 | 0.487                                                        | 3.470                          | 1671.47            | 5800.06            | 1.691                          | 1477.23            | 2498.51            |
| A_68_P27081458 | chr10:39646733-39646777                           | NM_001163503:-25 | 2010001E11Rik | PROMOTER               | 0.17                                                         | 2.014                          | 4124.06            | 8304.38            | 0.341                          | 2890.40            | 986.74             |
| A_68_P31619415 | chr18:35812025-35812069                           | NM_027222:-3025  | 2010001M09Rik | PROMOTER               | 0.644                                                        | 12.405                         | 1414.29            | 17544.92           | 7.989                          | 1386.57            | 11076.80           |
| A_68_P24127508 | chr5:138220341-138220385                          | NM_027242:217    | 2010007H12Rik | INSIDE                 | 0.397                                                        | 8.140                          | 2041.31            | 16615.61           | 3.232                          | 1778.16            | 5746.73            |
| A_68_P21863763 | chr2:172171241-172171285                          | NM_025912:186    | 2010011I20Rik | INSIDE                 | 0.551                                                        | 4.238                          | 1297.51            | 5498.66            | 2.334                          | 1052.63            | 2456.94            |
| A_68_P32145408 | chr19:46764549-46764593                           | NM_025563:175    | 2010012O05Rik | INSIDE                 | 0.181                                                        | 18.753                         | 1471.87            | 27601.74           | 3.391                          | 1275.47            | 4324.57            |
| A_68_P28747157 | chr12:113205097-113205141                         | NM_027360:70     | 2010107E04Rik | INSIDE                 | 0.628                                                        | 0.483                          | 1002.34            | 484.08             | 0.303                          | 747.92             | 226.91             |
| A_68_P29509891 | chr14:31944757-31944801                           | NR_024069:-2662  | 2010107H07Rik | DIVERGENT_PROMOTER     | 0.038                                                        | 57.614                         | 1157.88            | 66710.53           | 2.193                          | 993.93             | 2179.72            |
| A_68_P29509872 | chr14:31942367-31942412                           | NR_024069:-273   | 2010107H07Rik | DIVERGENT_PROMOTER     | 0.233                                                        | 10.937                         | 2520.47            | 27566.34           | 2.552                          | 1907.23            | 4867.11            |
| A_68_P29509885 | chr14:31944046-31944090                           | NR_024069:-1952  | 2010107H07Rik | DIVERGENT_PROMOTER     | 0.332                                                        | 13.826                         | 1108.20            | 15321.39           | 4.591                          | 945.75             | 4342.21            |
| A_68_P29509887 | chr14:31944357-31944401                           | NR_024069:-2262  | 2010107H07Rik | DIVERGENT_PROMOTER     | 0.42                                                         | 0.711                          | 1857.24            | 1319.65            | 0.299                          | 1604.66            | 479.15             |
| A_68_P29509871 | chr14:31942240-31942284                           | NR_024069:-146   | 2010107H07Rik | DIVERGENT_PROMOTER     | 0.384                                                        | 0.560                          | 1006.06            | 563.43             | 0.215                          | 781.15             | 168.03             |
| A_68_P28336340 | chr12:33063936-33063980                           | NM_001162903:305 | 2010109K11Rik | INSIDE                 | 0.645                                                        | 0.424                          | 2377.78            | 1007.94            | 0.273                          | 1819.75            | 497.23             |
| A_68_P28336338 | chr12:33063643-33063687                           | NM_001162903:11  | 2010109K11Rik | INSIDE                 | 0.639                                                        | 2.533                          | 2129.11            | 5393.37            | 1.618                          | 1804.96            | 2919.64            |
| A_68_P23195471 | chr4:108000991-108001035                          | NM_027250:256    | 2010305A19Rik | INSIDE                 | 0.465                                                        | 0.576                          | 6022.91            | 3469.62            | 0.268                          | 4856.87            | 1300.20            |
| A_68_P26584998 | chr9:64808639-64808683                            | NM_175153:-83    | 2010321M09Rik | PROMOTER               | 0.185                                                        | 1.633                          | 2956.14            | 4828.14            | 0.303                          | 2255.55            | 683.03             |
| A_68_P23189066 | chr4:106851077-106851121                          | NM_025617:-127   | 2210012G02Rik | DIVERGENT_PROMOTER     | 0.562                                                        | 5.301                          | 1837.37            | 9739.51            | 2.977                          | 1619.26            | 4820.62            |
| A_68_P24006959 | chr5:115392406-115392450                          | NM_028211:218    | 2210016L21Rik | INSIDE                 | 0.658                                                        | 2.708                          | 3946.82            | 10687.72           | 1.782                          | 2922.23            | 5208.83            |
| A_68_P25357073 | chr7:105804516-105804560                          | NM_172280:541    | 2210018M11Rik | INSIDE                 | 0.095                                                        | 37.445                         | 18433.91           | 690255.90          | 3.576                          | 24728.91           | 88424.40           |
| A_68_P25357074 | chr7:105804627-105804671                          | NM_172280:431    | 2210018M11Rik | INSIDE                 | 0.376                                                        | 9.022                          | 2786.48            | 25138.49           | 3.394                          | 2510.60            | 8519.92            |
| A_68_P24172797 | chr5:148086308-148086352                          | NR_038157:-3233  | 2210019I11Rik | PROMOTER               | 0.5                                                          | 0.603                          | 1216.85            | 733.98             | 0.302                          | 1112.90            | 335.60             |
| A_68_P30403119 | chr15:85641848-85641892                           | NM_001164625:257 | 2210021J22Rik | INSIDE                 | 0.544                                                        | 0.397                          | 1588.78            | 630.38             | 0.216                          | 1223.56            | 264.27             |
| A_68_P24950521 | chr7:4740854-4740898                              | NM_029384:286    | 2210411K11Rik | INSIDE                 | 0.309                                                        | 1.572                          | 1324.77            | 2082.28            | 0.486                          | 998.17             | 484.94             |
| A_68_P21812641 | chr2:163298061-163298105                          | NR_028122:-198   | 2310001K24Rik | PROMOTER               | 0.4                                                          | 5.320                          | 1930.72            | 10271.14           | 2.126                          | 1697.36            | 3607.90            |
| A_68_P28157940 | chr11:116060053-116060097                         | NM_027107:-94    | 2310004N24Rik | PROMOTER               | 0.504                                                        | 0.183                          | 2703.58            | 494.84             | 0.092                          | 1843.39            | 170.13             |
| A_68_P27282447 | chr10:79783116-79783160                           | NM_025521:155    | 2310011J03Rik | INSIDE                 | 0.585                                                        | 0.435                          | 5773.83            | 2513.29            | 0.255                          | 3583.49            | 912.99             |
| A_68_P31161375 | chr17:36002953-36002997                           | NM_001146710:-98 | 2310014H01Rik | PROMOTER               | 0.145                                                        | 22.932                         | 4231.73            | 97041.41           | 3.324                          | 3452.64            | 11475.73           |
| A_68_P24973681 | chr7:13513425-13513470                            | NM_029809:683    | 2310014L17Rik | INSIDE                 | 0.516                                                        | 0.323                          | 1445.81            | 466.66             | 0.167                          | 1132.74            | 188.62             |
| A_68_P24973686 | chr7:13514022-13514066                            | NM_029809:1280   | 2310014L17Rik | INSIDE                 | 0.593                                                        | 2.922                          | 3446.04            | 10068.38           | 1.731                          | 2461.50            | 4261.20            |
| A_68_P24973683 | chr7:13513671-13513715                            | NM_029809:928    | 2310014L17Rik | INSIDE                 | 0.344                                                        | 0.740                          | 2424.54            | 1794.88            | 0.255                          | 1892.17            | 482.51             |
| A_68_P28573972 | chr12:81233698-81233742                           | NR_033514:111    | 2310015A10Rik | INSIDE                 | 0.578                                                        | 5.984                          | 671.43             | 4017.58            | 3.456                          | 566.32             | 1957.41            |
| A_68_P26246901 | chr8:127187263-127187307                          | NM_175149:-15    | 2310022B05Rik | PROMOTER               | 0.33                                                         | 0.287                          | 3043.48            | 874.82             | 0.095                          | 2246.62            | 212.87             |
| A_68_P22862938 | chr4:41516022-41516066                            | NM_001159583:516 | 2310028H24Rik | INSIDE                 | 0.518                                                        | 0.221                          | 2417.11            | 533.28             | 0.114                          | 1568.04            | 179.26             |
| A_68_P23349884 | chr4:138686603-138686647                          | NR_033745:328    | 2310028O11Rik | INSIDE                 | 0.419                                                        | 5.729                          | 4633.86            | 26546.83           | 2.4                            | 3954.54            | 9492.45            |
| A_68_P23349886 | chr4:138686821-138686865                          | NR_033745:110    | 2310028O11Rik | INSIDE                 | 0.426                                                        | 0.237                          | 2208.47            | 523.23             | 0.101                          | 1701.74            | 171.84             |
| A_68_P26023270 | chr8:87551092-87551137                            | NM_026760:383    | 2310036O22Rik | INSIDE                 | 0.627                                                        | 2.664                          | 2249.34            | 5992.51            | 1.669                          | 1834.56            | 3062.38            |
| A_68_P31208848 | chr17:46910008-46910052                           | NM_025966:447    | 2310039H08Rik | INSIDE                 | 0.617                                                        | 2.514                          | 1145.74            | 2880.72            | 1.552                          | 909.10             | 1411.01            |
| A_68_P28613115 | chr12:88288746-88288790                           | NM_173735:476    | 2310044G17Rik | INSIDE                 | 0.26                                                         | 0.386                          | 2368.13            | 913.33             | 0.1                            | 1740.73            | 174.32             |
| A_68_P27892803 | chr11:68873789-68873833                           | NM_028005:534    | 2310047M10Rik | INSIDE                 | 0.615                                                        | 2.597                          | 2141.66            | 5561.58            | 1.596                          | 1688.90            | 2695.47            |
| A_68_P27288028 | chr10:80657209-80657253                           | NR_015477:-205   | 2310050B05Rik | PROMOTER               | 0.315                                                        | 6.501                          | 2568.10            | 16694.83           | 2.051                          | 2373.87            | 4868.22            |
| A_68_P31161581 | chr17:36034296-36034340                           | NM_001033630:5   | 2310061I04Rik | INSIDE                 | 0.358                                                        | 11.094                         | 1306.38            | 14493.21           | 3.971                          | 1067.09            | 4237.42            |
| A_68_P30483167 | chr15:99803669-99803713                           | NR_028124:28     | 2310068J16Rik | INSIDE                 | 0.601                                                        | 0.662                          | 3695.49            | 2446.92            | 0.398                          | 2651.20            | 1055.05            |
| A_68_P23601494 | chr5:35917751-35917795                            | NM_030208:-53    | 2310079F23Rik | DIVERGENT_PROMOTER     | 0.657                                                        | 0.332                          | 1347.69            | 447.55             | 0.218                          | 1014.40            | 221.39             |
| A_68_P23601493 | chr5:35917636-35917680                            | NM_030208:61     | 2310079F23Rik | INSIDE                 | 0.537                                                        | 0.566                          | 1048.80            | 593.36             | 0.304                          | 822.91             | 250.22             |
| A_68_P25376021 | chr7:109054423-109054467                          | NM_025605:94     | 2400001E08Rik | INSIDE                 | 0.534                                                        | 0.363                          | 1658.38            | 601.28             | 0.194                          | 1305.21            | 252.76             |

| ProbeName      | Target position of probe on CpG island microarray | TargetID          | GeneSymbol    | CpG island Description | Ratio of relative methylation (TiO <sub>2</sub> -NP/Vehicle) | Sham group                     |                    |                    | TiO <sub>2</sub> -H group      |                    |                    |
|----------------|---------------------------------------------------|-------------------|---------------|------------------------|--------------------------------------------------------------|--------------------------------|--------------------|--------------------|--------------------------------|--------------------|--------------------|
|                |                                                   |                   |               |                        |                                                              | Relative methylation (Cy5/Cy3) | Cy3 signal (Input) | Cy5 signal (MeDIP) | Relative methylation (Cy5/Cy3) | Cy3 signal (Input) | Cy5 signal (MeDIP) |
| A_68_P26158468 | chr8:112217560-112217604                          | NM_028018:-388    | 2400003C14Rik | PROMOTER               | 0.581                                                        | 0.347                          | 1892.83            | 657.61             | 0.202                          | 1371.90            | 277.04             |
| A_68_P24430828 | chr6:49023823-49023867                            | NM_029353:51      | 2410003K15Rik | INSIDE                 | 0.49                                                         | 4.147                          | 2260.64            | 9374.26            | 2.033                          | 1815.81            | 3691.98            |
| A_68_P26631263 | chr9:72951130-72951174                            | NM_025890:948     | 2410004A20Rik | INSIDE                 | 0.476                                                        | 4.960                          | 1887.49            | 9362.48            | 2.361                          | 1635.30            | 3861.06            |
| A_68_P31609277 | chr18:33954596-33954640                           | NR_038151:73      | 2410004N09Rik | INSIDE                 | 0.628                                                        | 2.170                          | 3239.17            | 7027.39            | 1.363                          | 2571.96            | 3506.32            |
| A_68_P26760984 | chr9:98765311-98765355                            | NM_028033:147     | 2410012M07Rik | INSIDE                 | 0.558                                                        | 3.215                          | 10285.40           | 33067.04           | 1.795                          | 7840.55            | 14073.05           |
| A_68_P28595535 | chr12:85292140-85292184                           | NM_023633:605     | 2410016O06Rik | INSIDE                 | 0.58                                                         | 6.576                          | 1480.27            | 9733.86            | 3.812                          | 1124.93            | 4288.29            |
| A_68_P30345268 | chr15:75812328-75812373                           | NM_001163518:365  | 2410075B13Rik | INSIDE                 | 0.646                                                        | 3.343                          | 871.00             | 2911.39            | 2.159                          | 684.44             | 1477.49            |
| A_68_P29998441 | chr15:8118989-8119033                             | NM_001162906:-95  | 2410089E03Rik | PROMOTER               | 0.529                                                        | 3.963                          | 834.13             | 3305.60            | 2.098                          | 703.07             | 1474.83            |
| A_68_P31992368 | chr19:18745200-18745244                           | NM_026120:-47     | 2410127L17Rik | PROMOTER               | 0.43                                                         | 15.003                         | 750.98             | 11266.57           | 6.448                          | 896.41             | 5780.04            |
| A_68_P24025505 | chr5:118695459-118695503                          | NM_001081236:245  | 2410131K14Rik | INSIDE                 | 0.388                                                        | 0.267                          | 2172.99            | 579.48             | 0.104                          | 1663.19            | 172.15             |
| A_68_P24015125 | chr5:116896779-116896823                          | NR_015595:8070    | 2410137F16Rik | INSIDE                 | 0.507                                                        | 0.693                          | 1551.30            | 1075.54            | 0.351                          | 1133.24            | 398.08             |
| A_68_P23297489 | chr4:129278119-129278163                          | NM_029748:190     | 2510006D16Rik | INSIDE                 | 0.591                                                        | 26.050                         | 6863.68            | 178799.90          | 15.387                         | 6430.34            | 98944.01           |
| A_68_P23297490 | chr4:129278201-129278245                          | NM_029748:272     | 2510006D16Rik | INSIDE                 | 0.567                                                        | 0.631                          | 1013.22            | 639.02             | 0.358                          | 809.47             | 289.40             |
| A_68_P27288890 | chr10:80788199-80788243                           | NM_027381:4373    | 2510012J08Rik | INSIDE                 | 0.063                                                        | 35.186                         | 2489.48            | 87594.40           | 2.223                          | 1895.64            | 4214.44            |
| A_68_P27288850 | chr10:80783292-80783342                           | NM_027381:-531    | 2510012J08Rik | PROMOTER               | 0.574                                                        | 0.180                          | 6877.60            | 1239.96            | 0.103                          | 4380.36            | 452.99             |
| A_68_P27288891 | chr10:80788278-80788322                           | NM_027381:4453    | 2510012J08Rik | INSIDE                 | 0.204                                                        | 7.446                          | 5955.39            | 44342.46           | 1.518                          | 4664.63            | 7078.62            |
| A_68_P23391467 | chr4:147315560-147315604                          | NM_029841:579     | 2510039O18Rik | INSIDE                 | 0.213                                                        | 6.921                          | 1466.78            | 10151.09           | 1.474                          | 1232.99            | 1817.36            |
| A_68_P23323199 | chr4:134066870-134066914                          | NM_001081099:-21  | 2610002D18Rik | PROMOTER               | 0.371                                                        | 6.694                          | 1934.31            | 12947.65           | 2.482                          | 1694.40            | 4205.62            |
| A_68_P23323200 | chr4:134067066-134067110                          | NM_001081099:175  | 2610002D18Rik | INSIDE                 | 0.646                                                        | 0.349                          | 6404.91            | 2237.63            | 0.226                          | 4041.83            | 912.63             |
| A_68_P26822984 | chr9:110207818-110207862                          | NM_001081381:145  | 2610002I17Rik | INSIDE                 | 0.549                                                        | 3.376                          | 1127.33            | 3806.18            | 1.853                          | 891.95             | 1652.82            |
| A_68_P23437418 | chr4:154623816-154623860                          | NM_001190445:-236 | 2610002J02Rik | PROMOTER               | 0.285                                                        | 1.592                          | 1666.98            | 2653.74            | 0.454                          | 1397.84            | 634.23             |
| A_68_P32373277 | chrX:48194552-48194596                            | NM_133729:-38     | 2610018G03Rik | PROMOTER               | 0.451                                                        | 6.008                          | 935.60             | 5620.92            | 2.711                          | 1018.23            | 2760.20            |
| A_68_P25671550 | chr8:13975017-13975061                            | NM_173744:-261    | 2610019F03Rik | PROMOTER               | 0.414                                                        | 0.349                          | 1876.08            | 655.17             | 0.145                          | 1325.53            | 191.83             |
| A_68_P30958538 | chr16:90727762-90727806                           | NM_025642:-168    | 2610039C10Rik | PROMOTER               | 0.336                                                        | 19.206                         | 4886.50            | 93851.64           | 6.458                          | 4350.82            | 28097.97           |
| A_68_P26742258 | chr9:95412445-95412489                            | NM_001114977:-51  | 2610101N10Rik | PROMOTER               | 0.144                                                        | 75.112                         | 11925.79           | 895774.60          | 10.851                         | 18410.47           | 199780.80          |
| A_68_P23392563 | chr4:147504999-147505043                          | NM_027426:-213    | 2610109H07Rik | DIVERGENT_PROMOTER     | 0.624                                                        | 2.784                          | 1257.54            | 3500.59            | 1.738                          | 1112.53            | 1933.54            |
| A_68_P29699590 | chr14:70553011-70553058                           | NM_146055:564     | 2610301G19Rik | INSIDE                 | 0.27                                                         | 1.571                          | 5083.44            | 7986.67            | 0.425                          | 3079.59            | 1307.66            |
| A_68_P29699589 | chr14:70552945-70552991                           | NM_146055:630     | 2610301G19Rik | INSIDE                 | 0.292                                                        | 1.363                          | 2930.91            | 3995.31            | 0.398                          | 1607.38            | 639.08             |
| A_68_P27942255 | chr11:78075391-78075435                           | NM_001002004:157  | 2610507B11Rik | INSIDE                 | 0.353                                                        | 0.449                          | 2744.82            | 1231.44            | 0.158                          | 1950.65            | 308.76             |
| A_68_P27942253 | chr11:78075063-78075107                           | NM_001002004:-171 | 2610507B11Rik | PROMOTER               | 0.579                                                        | 8.196                          | 2283.45            | 18715.86           | 4.743                          | 1853.68            | 8791.09            |
| A_68_P27835441 | chr11:59015919-59015963                           | NR_037964:-7      | 2610507I01Rik | DIVERGENT_PROMOTER     | 0.607                                                        | 2.394                          | 6106.10            | 14619.93           | 1.454                          | 4529.56            | 6584.36            |
| A_68_P21503641 | chr2:106814392-106814436                          | NM_173750:-3866   | 2700007P21Rik | PROMOTER               | 0.438                                                        | 0.443                          | 3482.80            | 1543.97            | 0.194                          | 2480.10            | 481.78             |
| A_68_P23801180 | chr5:74488973-74489017                            | NR_015531:-113    | 2700023E23Rik | PROMOTER               | 0.611                                                        | 2.972                          | 1035.17            | 3076.92            | 1.815                          | 907.19             | 1646.52            |
| A_68_P25541691 | chr7:140829138-140829185                          | NM_178115:-196    | 2700050L05Rik | PROMOTER               | 0.507                                                        | 0.602                          | 994.85             | 598.78             | 0.305                          | 772.05             | 235.59             |
| A_68_P31560300 | chr18:24625872-24625916                           | NM_026529:-3477   | 2700062C07Rik | PROMOTER               | 0.379                                                        | 5.141                          | 2052.87            | 10554.02           | 1.946                          | 1620.86            | 3154.59            |
| A_68_P25592704 | chr7:149246956-149247000                          | NM_028308:-39     | 2700078K21Rik | PROMOTER               | 0.478                                                        | 8.148                          | 1639.42            | 13357.89           | 3.898                          | 1543.71            | 6017.01            |
| A_68_P25592703 | chr7:149246867-149246911                          | NM_028308:51      | 2700078K21Rik | INSIDE                 | 0.277                                                        | 6.393                          | 1118.04            | 7147.61            | 1.769                          | 1018.64            | 1802.14            |
| A_68_P31939722 | chr19:7497157-7497201                             | NM_175381:5064    | 2700081O15Rik | INSIDE                 | 0.42                                                         | 0.453                          | 1162.03            | 525.99             | 0.19                           | 947.62             | 180.02             |
| A_68_P31939724 | chr19:7497408-7497452                             | NM_175381:5316    | 2700081O15Rik | INSIDE                 | 0.452                                                        | 0.327                          | 1640.27            | 535.61             | 0.148                          | 1161.33            | 171.47             |
| A_68_P31939711 | chr19:7496090-7496134                             | NM_175381:3998    | 2700081O15Rik | INSIDE                 | 0.463                                                        | 9.177                          | 2386.80            | 21902.44           | 4.252                          | 2359.97            | 10034.06           |
| A_68_P31939719 | chr19:7496867-7496911                             | NM_175381:4774    | 2700081O15Rik | INSIDE                 | 0.498                                                        | 5.044                          | 1930.65            | 9739.02            | 2.513                          | 1539.12            | 3867.10            |
| A_68_P31939675 | chr19:7491423-7491467                             | NM_175381:-670    | 2700081O15Rik | PROMOTER               | 0.531                                                        | 0.431                          | 1028.97            | 443.92             | 0.229                          | 749.33             | 171.75             |
| A_68_P31939680 | chr19:7491931-7491975                             | NM_175381:-162    | 2700081O15Rik | PROMOTER               | 0.36                                                         | 4.310                          | 1651.47            | 7117.52            | 1.552                          | 1339.64            | 2078.70            |
| A_68_P24856098 | chr6:133055497-133055541                          | NM_001163445:262  | 2700089E24Rik | INSIDE                 | 0.321                                                        | 5.551                          | 1167.06            | 6478.03            | 1.781                          | 1163.06            | 2070.84            |
| A_68_P21393924 | chr2:84510645-84510689                            | NM_001033166:199  | 2700094K13Rik | INSIDE                 | 0.324                                                        | 2.033                          | 5578.55            | 11342.58           | 0.659                          | 3622.04            | 2387.31            |
| A_68_P29309087 | chr13:108834557-108834601                         | NM_001048250:-89  | 2810008M24Rik | PROMOTER               | 0.438                                                        | 10.992                         | 4356.19            | 47882.17           | 4.818                          | 3682.66            | 17741.57           |

| ProbeName      | Target position of probe on CpG island microarray | TargetID           | GeneSymbol    | CpG island Description | Ratio of relative methylation (TiO <sub>2</sub> -NP/Vehicle) | Sham group                     |                    |                    | TiO <sub>2</sub> -H group      |                    |                    |
|----------------|---------------------------------------------------|--------------------|---------------|------------------------|--------------------------------------------------------------|--------------------------------|--------------------|--------------------|--------------------------------|--------------------|--------------------|
|                |                                                   |                    |               |                        |                                                              | Relative methylation (Cy5/Cy3) | Cy3 signal (Input) | Cy5 signal (MeDIP) | Relative methylation (Cy5/Cy3) | Cy3 signal (Input) | Cy5 signal (MeDIP) |
| A_68_P27833211 | chr11:58680786-58680830                           | NM_172403:67       | 2810021J22Rik | INSIDE                 | 0.563                                                        | 0.607                          | 770.67             | 467.80             | 0.342                          | 661.79             | 226.00             |
| A_68_P28530097 | chr12:73186365-73186409                           | NM_026038:-86      | 2810055F11Rik | DIVERGENT_PROMOTER     | 0.309                                                        | 5.859                          | 2501.74            | 14656.86           | 1.809                          | 1978.94            | 3580.27            |
| A_68_P25952315 | chr8:73030423-73030467                            | NM_025577:194      | 2810428115Rik | INSIDE                 | 0.516                                                        | 0.341                          | 1521.58            | 518.96             | 0.176                          | 987.45             | 173.74             |
| A_68_P28788256 | chr13:3477776-3477820                             | NR_015522:250      | 2810429I04Rik | INSIDE                 | 0.481                                                        | 0.565                          | 3375.48            | 1907.63            | 0.272                          | 2645.05            | 719.65             |
| A_68_P23545746 | chr5:24606967-24607011                            | NR_027851:196      | 2900005J15Rik | INSIDE                 | 0.356                                                        | 0.550                          | 3049.21            | 1678.26            | 0.196                          | 2140.31            | 419.57             |
| A_68_P23545743 | chr5:24606691-24606735                            | NR_027851:-80      | 2900005J15Rik | DIVERGENT_PROMOTER     | 0.093                                                        | 21.508                         | 876.73             | 18856.29           | 2.01                           | 737.62             | 1482.28            |
| A_68_P21114427 | chr2:32143150-32143194                            | NM_175190:416      | 2900010J23Rik | INSIDE                 | 0.656                                                        | 0.485                          | 921.08             | 447.14             | 0.318                          | 794.97             | 253.15             |
| A_68_P31114505 | chr17:27270655-27270699                           | NM_026063:160      | 2900010M23Rik | INSIDE                 | 0.452                                                        | 23.184                         | 4599.91            | 106645.20          | 10.468                         | 4504.14            | 47151.51           |
| A_68_P23996379 | chr5:113567220-113567264                          | NM_172884:25091    | 2900026A02Rik | INSIDE                 | 0.425                                                        | 0.640                          | 1618.09            | 1035.16            | 0.272                          | 1155.28            | 314.22             |
| A_68_P20551799 | chr1:120356444-120356488                          | NR_027901:-624     | 2900060B14Rik | PROMOTER               | 0.379                                                        | 0.317                          | 1886.71            | 599.00             | 0.12                           | 1419.81            | 170.90             |
| A_68_P31331955 | chr17:71351299-71351343                           | NM_026064:553      | 2900073G15Rik | INSIDE                 | 0.606                                                        | 3.331                          | 3335.30            | 11110.10           | 2.017                          | 2718.11            | 5483.01            |
| A_68_P27787098 | chr11:49988398-49988442                           | NM_026543:68       | 3010026O09Rik | INSIDE                 | 0.316                                                        | 0.191                          | 3928.11            | 748.66             | 0.06                           | 2850.92            | 171.57             |
| A_68_P23023123 | chr4:74923898-74923942                            | NM_025849:270      | 3110001D03Rik | INSIDE                 | 0.506                                                        | 0.635                          | 1219.29            | 774.57             | 0.322                          | 1024.38            | 329.42             |
| A_68_P30558454 | chr16:13672209-13672253                           | NM_025653:118      | 3110001I22Rik | INSIDE                 | 0.276                                                        | 7.716                          | 1911.58            | 14749.22           | 2.127                          | 1550.34            | 3296.95            |
| A_68_P30558456 | chr16:13672419-13672463                           | NM_025653:328      | 3110001I22Rik | INSIDE                 | 0.512                                                        | 5.381                          | 701.31             | 3773.98            | 2.757                          | 553.26             | 1525.16            |
| A_68_P26973144 | chr10:17742962-17743006                           | NM_028440:74       | 3110003A17Rik | INSIDE                 | 0.605                                                        | 0.214                          | 3691.56            | 788.87             | 0.129                          | 2509.24            | 324.27             |
| A_68_P26973142 | chr10:17742734-17742778                           | NM_028440:302      | 3110003A17Rik | INSIDE                 | 0.248                                                        | 0.730                          | 3780.41            | 2759.07            | 0.181                          | 2774.98            | 503.09             |
| A_68_P24795431 | chr6:119798321-119798365                          | NR_030776:132      | 3110021A11Rik | INSIDE                 | 0.635                                                        | 0.680                          | 1054.15            | 717.35             | 0.432                          | 859.43             | 371.08             |
| A_68_P22834884 | chr4:35173017-35173061                            | NM_001081343:91    | 3110043O21Rik | INSIDE                 | 0.548                                                        | 2.473                          | 4469.14            | 11054.07           | 1.354                          | 3681.95            | 4986.28            |
| A_68_P20417972 | chr1:89371861-89371906                            | NM_028473:5045     | 3110079O15Rik | INSIDE                 | 0.108                                                        | 183.914                        | 1234.14            | 226976.60          | 19.933                         | 583.34             | 11627.45           |
| A_68_P31183537 | chr17:42453381-42453428                           | NM_028474:509      | 3110082D06Rik | INSIDE                 | 0.5                                                          | 0.332                          | 2499.17            | 828.80             | 0.166                          | 1687.97            | 279.99             |
| A_68_P24135766 | chr5:139936328-139936372                          | NM_028469:138      | 3110082I17Rik | INSIDE                 | 0.555                                                        | 3.297                          | 5227.02            | 17233.83           | 1.83                           | 4046.47            | 7403.43            |
| A_68_P28577065 | chr12:81793548-81793592                           | NM_001177503:-17   | 3830431G21Rik | DIVERGENT_PROMOTER     | 0.359                                                        | 0.573                          | 1004.54            | 575.69             | 0.206                          | 956.09             | 196.74             |
| A_68_P20147880 | chr1:36426249-36426293                            | NM_172652:-244     | 4632411B12Rik | PROMOTER               | 0.594                                                        | 2.993                          | 939.76             | 2812.42            | 1.777                          | 721.68             | 1282.40            |
| A_68_P21977361 | chr3:19795434-19795478                            | NR_027985:586      | 4632415L05Rik | INSIDE                 | 0.425                                                        | 0.210                          | 3514.67            | 736.35             | 0.089                          | 2422.85            | 215.69             |
| A_68_P23225501 | chr4:115410210-115410254                          | NM_172698:-445     | 4732418C07Rik | PROMOTER               | 0.552                                                        | 2.963                          | 2606.40            | 7723.58            | 1.637                          | 2159.42            | 3534.27            |
| A_68_P29049835 | chr13:54605357-54605401                           | NM_176987:213      | 4732471D19Rik | INSIDE                 | 0.441                                                        | 9.070                          | 1716.16            | 15565.32           | 4                              | 1515.47            | 6062.10            |
| A_68_P29049838 | chr13:54605642-54605686                           | NM_176987:499      | 4732471D19Rik | INSIDE                 | 0.548                                                        | 3.246                          | 930.19             | 3019.14            | 1.78                           | 844.63             | 1503.68            |
| A_68_P28706885 | chr12:106248338-106248382                         | NM_172500:-341     | 4831426119Rik | PROMOTER               | 0.189                                                        | 23.999                         | 5275.40            | 126604.90          | 4.541                          | 4767.68            | 21647.89           |
| A_68_P28706884 | chr12:106248180-106248224                         | NM_172500:-183     | 4831426119Rik | PROMOTER               | 0.512                                                        | 3.310                          | 2040.85            | 6756.12            | 1.696                          | 1675.58            | 2842.09            |
| A_68_P31422207 | chr17:87682043-87682087                           | NR_015506:90       | 4833418N02Rik | INSIDE                 | 0.569                                                        | 2.786                          | 2416.52            | 6731.56            | 1.584                          | 2149.17            | 3404.53            |
| A_68_P29050103 | chr13:54666500-54666544                           | NM_133797:221      | 4833439L19Rik | INSIDE                 | 0.406                                                        | 9.472                          | 2442.64            | 23136.73           | 3.847                          | 2286.26            | 8794.64            |
| A_68_P28463397 | chr12:58677434-58677478                           | NM_001037743:12355 | 4921506M07Rik | INSIDE                 | 0.498                                                        | 0.414                          | 1764.18            | 730.56             | 0.206                          | 1347.80            | 277.86             |
| A_68_P28463396 | chr12:58677361-58677405                           | NM_001037743:12281 | 4921506M07Rik | INSIDE                 | 0.58                                                         | 0.461                          | 2908.17            | 1340.34            | 0.267                          | 2198.55            | 587.28             |
| A_68_P30560722 | chr16:14159381-14159425                           | NM_001081154:-35   | 4921513D23Rik | DIVERGENT_PROMOTER     | 0.426                                                        | 3.582                          | 12446.97           | 44581.63           | 1.527                          | 7921.49            | 12093.43           |
| A_68_P22415393 | chr3:108743147-108743191                          | NM_001078646:-306  | 4921515J06Rik | PROMOTER               | 0.327                                                        | 8.131                          | 746.17             | 6067.46            | 2.66                           | 642.41             | 1708.94            |
| A_68_P21770588 | chr2:156137716-156137760                          | NM_027585:-470     | 4921517L17Rik | PROMOTER               | 0.583                                                        | 5.020                          | 1883.18            | 9453.35            | 2.925                          | 1601.32            | 4683.35            |
| A_68_P21900712 | chr2:179711703-179711747                          | NR_033782:167      | 4921531C22Rik | INSIDE                 | 0.334                                                        | 0.549                          | 1161.87            | 637.69             | 0.183                          | 957.03             | 175.51             |
| A_68_P27554559 | chr11:3794810-3794858                             | NM_026150:295      | 4921536K21Rik | INSIDE                 | 0.605                                                        | 3.103                          | 649.91             | 2016.39            | 1.876                          | 513.31             | 962.74             |
| A_68_P27289148 | chr10:80827041-80827085                           | NM_001014836:1503  | 4930404N11Rik | INSIDE                 | 0.552                                                        | 8.669                          | 6933.76            | 60107.99           | 4.782                          | 5450.93            | 26068.35           |
| A_68_P27289150 | chr10:80827282-80827326                           | NM_001014836:1261  | 4930404N11Rik | INSIDE                 | 0.356                                                        | 1.632                          | 5258.95            | 8582.41            | 0.581                          | 3531.42            | 2051.64            |
| A_68_P27289154 | chr10:80827741-80827785                           | NM_001014836:803   | 4930404N11Rik | INSIDE                 | 0.656                                                        | 0.606                          | 1953.13            | 1184.35            | 0.398                          | 1435.78            | 570.95             |
| A_68_P21042876 | chr2:18919881-18919925                            | NR_024323:-43      | 4930426L09Rik | DIVERGENT_PROMOTER     | 0.604                                                        | 14.903                         | 2271.51            | 33853.38           | 8.995                          | 2115.78            | 19032.05           |
| A_68_P28755052 | chr12:114394756-114394800                         | NM_134041:147      | 4930427A07Rik | INSIDE                 | 0.515                                                        | 0.243                          | 1871.22            | 454.67             | 0.125                          | 1391.08            | 174.23             |
| A_68_P26018418 | chr8:86671979-86672023                            | NM_001163752:64    | 4930432K21Rik | INSIDE                 | 0.59                                                         | 3.520                          | 2879.48            | 10136.25           | 2.078                          | 2185.96            | 4542.97            |
| A_68_P25730019 | chr8:27096869-27096915                            | NM_029037:7701     | 4930444A02Rik | INSIDE                 | 0.499                                                        | 4.482                          | 1915.86            | 8587.63            | 2.235                          | 1390.70            | 3108.12            |

| ProbeName      | Target position of probe on CpG island microarray | TargetID          | GeneSymbol    | CpG island Description | Ratio of relative methylation (TiO <sub>2</sub> -NP/Vehicle) | Sham group                     |                    |                    | TiO <sub>2</sub> -H group      |                    |                    |
|----------------|---------------------------------------------------|-------------------|---------------|------------------------|--------------------------------------------------------------|--------------------------------|--------------------|--------------------|--------------------------------|--------------------|--------------------|
|                |                                                   |                   |               |                        |                                                              | Relative methylation (Cy5/Cy3) | Cy3 signal (Input) | Cy5 signal (MeDIP) | Relative methylation (Cy5/Cy3) | Cy3 signal (Input) | Cy5 signal (MeDIP) |
| A_68_P28534553 | chr12:74018698-74018742                           | NM_029444:32      | 4930447C04Rik | INSIDE                 | 0.318                                                        | 8.845                          | 6475.06            | 57269.33           | 2.816                          | 6624.27            | 18656.51           |
| A_68_P28534551 | chr12:74018450-74018494                           | NM_029444:280     | 4930447C04Rik | INSIDE                 | 0.473                                                        | 11.002                         | 2086.52            | 22955.46           | 5.206                          | 1993.55            | 10379.22           |
| A_68_P30686476 | chr16:38522756-38522801                           | NM_024273:-31     | 4930455C21Rik | PROMOTER               | 0.335                                                        | 19.519                         | 3908.37            | 76286.50           | 6.543                          | 3735.49            | 24441.40           |
| A_68_P30686475 | chr16:38522686-38522730                           | NM_024273:39      | 4930455C21Rik | INSIDE                 | 0.632                                                        | 0.446                          | 1451.07            | 647.37             | 0.282                          | 1157.49            | 326.19             |
| A_68_P23062804 | chr4:83171213-83171257                            | NM_001081012:-214 | 4930473A06Rik | PROMOTER               | 0.624                                                        | 4.196                          | 1106.91            | 4644.93            | 2.617                          | 959.48             | 2511.44            |
| A_68_P26073640 | chr8:96337458-96337502                            | NR_026888:-25     | 4930488L21Rik | PROMOTER               | 0.195                                                        | 10.892                         | 843.24             | 9184.51            | 2.127                          | 694.71             | 1477.47            |
| A_68_P31122921 | chr17:28660085-28660129                           | NM_026290:-7699   | 4930511H11Rik | PROMOTER               | 0.239                                                        | 6.725                          | 1855.53            | 12479.27           | 1.61                           | 1387.60            | 2233.54            |
| A_68_P26085413 | chr8:98330883-98330927                            | NR_015574:175     | 4930513N10Rik | INSIDE                 | 0.281                                                        | 30.422                         | 12749.69           | 387869.40          | 8.559                          | 11443.59           | 97941.76           |
| A_68_P26085411 | chr8:98330678-98330722                            | NR_015574:-29     | 4930513N10Rik | PROMOTER               | 0.521                                                        | 0.128                          | 7002.54            | 896.67             | 0.067                          | 4699.61            | 313.33             |
| A_68_P27686040 | chr11:31865634-31865678                           | NM_026262:24      | 4930524B15Rik | INSIDE                 | 0.599                                                        | 2.590                          | 2377.96            | 6159.54            | 1.552                          | 1860.68            | 2888.04            |
| A_68_P33007146 | chr9_random:49897-49941                           | NR_015516:-3490   | 4930526115Rik | PROMOTER               | 0.029                                                        | 92.371                         | 2055.72            | 189889.90          | 2.712                          | 2242.32            | 6080.49            |
| A_68_P33007145 | chr9_random:49764-49808                           | NR_015516:-3622   | 4930526115Rik | PROMOTER               | 0.106                                                        | 106.230                        | 5527.02            | 587136.80          | 11.264                         | 7480.18            | 84260.53           |
| A_68_P33012150 | chr9_random:53992-54036                           | NR_027950:-678    | 4930526115Rik | PROMOTER               | 0.362                                                        | 22.127                         | 16431.24           | 363572.80          | 8                              | 15911.47           | 127286.60          |
| A_68_P33012155 | chr9_random:54509-54553                           | NR_027950:-162    | 4930526115Rik | PROMOTER               | 0.406                                                        | 6.683                          | 5055.25            | 33784.29           | 2.713                          | 4165.13            | 11301.82           |
| A_68_P33012178 | chr9_random:57139-57183                           | NR_027950:2468    | 4930526115Rik | DOWNSTREAM             | 0.413                                                        | 0.242                          | 2025.60            | 489.41             | 0.1                            | 1697.32            | 169.28             |
| A_68_P33007147 | chr9_random:49997-50041                           | NR_015516:-3390   | 4930526115Rik | PROMOTER               | 0.527                                                        | 4.181                          | 1515.62            | 6336.10            | 2.202                          | 1191.06            | 2622.19            |
| A_68_P33012151 | chr9_random:54119-54163                           | NR_027950:-552    | 4930526115Rik | PROMOTER               | 0.556                                                        | 0.422                          | 3332.11            | 1405.44            | 0.235                          | 2516.48            | 590.47             |
| A_68_P33007150 | chr9_random:50340-50384                           | NR_015516:-3046   | 4930526115Rik | PROMOTER               | 0.262                                                        | 5.785                          | 4307.91            | 24921.83           | 1.513                          | 3126.19            | 4730.66            |
| A_68_P22552055 | chr3:135101078-135101122                          | NR_030689:529     | 4930539J05Rik | INSIDE                 | 0.217                                                        | 13.154                         | 860.89             | 11324.05           | 2.851                          | 897.49             | 2558.31            |
| A_68_P22552056 | chr3:135101186-135101230                          | NR_030689:421     | 4930539J05Rik | INSIDE                 | 0.558                                                        | 0.725                          | 2142.64            | 1554.21            | 0.405                          | 1608.91            | 651.30             |
| A_68_P20252732 | chr1:57434304-57434348                            | NR_037999:62      | 4930558J18Rik | INSIDE                 | 0.662                                                        | 0.509                          | 1434.72            | 730.56             | 0.337                          | 1203.44            | 405.82             |
| A_68_P27910204 | chr11:72028429-72028473                           | NM_001163728:-189 | 4930563E22Rik | PROMOTER               | 0.548                                                        | 0.232                          | 3569.23            | 826.98             | 0.127                          | 2365.61            | 300.45             |
| A_68_P30339175 | chr15:74551980-74552024                           | NM_198607:339     | 4930572J05Rik | INSIDE                 | 0.247                                                        | 9.854                          | 862.22             | 8496.47            | 2.438                          | 882.05             | 2150.40            |
| A_68_P22264735 | chr3:79433039-79433083                            | NM_029482:60      | 4930579G24Rik | INSIDE                 | 0.364                                                        | 0.368                          | 4630.62            | 1702.71            | 0.134                          | 3633.32            | 485.81             |
| A_68_P26759315 | chr9:98464037-98464081                            | NR_029444:-28     | 4930579K19Rik | DIVERGENT_PROMOTER     | 0.399                                                        | 0.358                          | 1906.28            | 681.70             | 0.143                          | 1379.72            | 196.63             |
| A_68_P30959226 | chr16:90831427-90831471                           | NM_001199210:345  | 4931408A02Rik | INSIDE                 | 0.357                                                        | 1.751                          | 3219.74            | 5638.35            | 0.625                          | 2673.19            | 1671.39            |
| A_68_P30959217 | chr16:90830454-90830498                           | NM_001199210:-627 | 4931408A02Rik | PROMOTER               | 0.503                                                        | 3.113                          | 2804.71            | 8731.09            | 1.567                          | 1980.68            | 3103.89            |
| A_68_P30959222 | chr16:90831079-90831123                           | NM_001199210:-3   | 4931408A02Rik | PROMOTER               | 0.515                                                        | 3.309                          | 960.26             | 3177.89            | 1.704                          | 855.79             | 1458.34            |
| A_68_P26132762 | chr8:107813304-107813348                          | NM_001166394:102  | 4931428F04Rik | INSIDE                 | 0.392                                                        | 0.469                          | 3182.00            | 1493.03            | 0.184                          | 2185.05            | 401.91             |
| A_68_P22200393 | chr3:65333036-65333080                            | NR_027955:278     | 4931440P22Rik | INSIDE                 | 0.425                                                        | 18.263                         | 2711.64            | 49521.70           | 7.759                          | 3283.57            | 25475.77           |
| A_68_P27360775 | chr10:94151238-94151282                           | NR_015524:98      | 4932415G12Rik | INSIDE                 | 0.261                                                        | 1.350                          | 1967.11            | 2655.36            | 0.353                          | 1394.98            | 492.33             |
| A_68_P22060448 | chr3:36762071-36762115                            | NM_172679:65      | 4932438A13Rik | INSIDE                 | 0.53                                                         | 4.227                          | 1575.09            | 6657.86            | 2.238                          | 1377.25            | 3082.85            |
| A_68_P22060450 | chr3:36762326-36762370                            | NM_172679:321     | 4932438A13Rik | INSIDE                 | 0.13                                                         | 0.749                          | 7855.98            | 5887.33            | 0.098                          | 5719.57            | 557.66             |
| A_68_P28083992 | chr11:103079644-103079688                         | NM_177801:80      | 4933400C05Rik | INSIDE                 | 0.277                                                        | 1.476                          | 1964.23            | 2898.66            | 0.409                          | 1747.47            | 714.10             |
| A_68_P26202775 | chr8:119960432-119960476                          | NM_028941:87385   | 4933407C03Rik | INSIDE                 | 0.657                                                        | 4.132                          | 2398.43            | 9909.56            | 2.713                          | 1553.32            | 4214.26            |
| A_68_P23588493 | chr5:33721117-33721161                            | NM_001081101:-206 | 4933407H18Rik | PROMOTER               | 0.372                                                        | 12.593                         | 6633.59            | 83536.60           | 4.686                          | 6655.77            | 31188.57           |
| A_68_P25834612 | chr8:47248897-47248941                            | NM_025747:-5991   | 4933411K20Rik | PROMOTER               | 0.312                                                        | 4.993                          | 5220.99            | 26070.94           | 1.558                          | 4141.46            | 6454.37            |
| A_68_P22402613 | chr3:106525217-106525262                          | NM_001039488:640  | 4933421E11Rik | INSIDE                 | 0.638                                                        | 0.392                          | 3218.11            | 1261.44            | 0.25                           | 2305.07            | 576.03             |
| A_68_P28577649 | chr12:81891588-81891632                           | NM_178682:65      | 4933426M11Rik | INSIDE                 | 0.581                                                        | 2.669                          | 1347.98            | 3598.27            | 1.55                           | 1105.99            | 1713.82            |
| A_68_P30367720 | chr15:79489229-79489273                           | NM_029407:136     | 4933432B09Rik | INSIDE                 | 0.373                                                        | 4.086                          | 1640.21            | 6701.94            | 1.526                          | 1400.24            | 2136.35            |
| A_68_P28710687 | chr12:106923624-106923668                         | NM_178613:85      | 4933433P14Rik | INSIDE                 | 0.1                                                          | 1.725                          | 5886.75            | 10151.73           | 0.173                          | 3579.19            | 618.56             |
| A_68_P28710691 | chr12:106924056-106924100                         | NM_178613:517     | 4933433P14Rik | INSIDE                 | 0.449                                                        | 0.578                          | 1079.76            | 624.36             | 0.259                          | 896.88             | 232.71             |
| A_68_P26065121 | chr8:94879862-94879906                            | NR_033641:135     | 4933436C20Rik | INSIDE                 | 0.374                                                        | 1.469                          | 1107.29            | 1626.99            | 0.55                           | 1055.86            | 580.68             |
| A_68_P27842891 | chr11:60230619-60230663                           | NM_025757:-6      | 4933439F18Rik | DIVERGENT_PROMOTER     | 0.192                                                        | 22.260                         | 5220.44            | 116207.70          | 4.272                          | 4555.48            | 19459.76           |
| A_68_P27842896 | chr11:60231205-60231249                           | NM_025757:580     | 4933439F18Rik | INSIDE                 | 0.247                                                        | 25.566                         | 5995.79            | 153288.20          | 6.318                          | 5234.26            | 33068.95           |
| A_68_P22130346 | chr3:51364011-51364056                            | NR_033624:355     | 5031434011Rik | INSIDE                 | 0.613                                                        | 4.357                          | 3246.09            | 14142.83           | 2.669                          | 2627.84            | 7013.68            |

| ProbeName      | Target position of probe on CpG island microarray | TargetID           | GeneSymbol    | CpG island Description | Ratio of relative methylation (TiO <sub>2</sub> -NP/Vehicle) | Sham group                     |                    |                    | TiO <sub>2</sub> -H group      |                    |                    |
|----------------|---------------------------------------------------|--------------------|---------------|------------------------|--------------------------------------------------------------|--------------------------------|--------------------|--------------------|--------------------------------|--------------------|--------------------|
|                |                                                   |                    |               |                        |                                                              | Relative methylation (Cy5/Cy3) | Cy3 signal (Input) | Cy5 signal (MeDIP) | Relative methylation (Cy5/Cy3) | Cy3 signal (Input) | Cy5 signal (MeDIP) |
| A_68_P28853130 | chr13:17786779-17786823                           | NM_138654:-201     | 5033411D12Rik | DIVERGENT_PROMOTER     | 0.223                                                        | 1.754                          | 8591.83            | 15066.89           | 0.391                          | 6419.87            | 2512.42            |
| A_68_P28853131 | chr13:17786859-17786903                           | NM_138654:-281     | 5033411D12Rik | DIVERGENT_PROMOTER     | 0.334                                                        | 0.258                          | 3962.19            | 1020.85            | 0.086                          | 3078.42            | 265.06             |
| A_68_P28853128 | chr13:17786438-17786482                           | NM_138654:139      | 5033411D12Rik | INSIDE                 | 0.453                                                        | 0.607                          | 997.98             | 606.08             | 0.275                          | 839.51             | 230.80             |
| A_68_P28853129 | chr13:17786533-17786577                           | NM_138654:45       | 5033411D12Rik | INSIDE                 | 0.228                                                        | 5.863                          | 9270.89            | 54351.86           | 1.339                          | 7371.60            | 9868.53            |
| A_68_P30753194 | chr16:50732861-50732905                           | NR_028300:4        | 5330426P16Rik | INSIDE                 | 0.625                                                        | 2.320                          | 2027.94            | 4705.32            | 1.451                          | 1670.92            | 2423.74            |
| A_68_P21745336 | chr2:151527951-151527995                          | NM_001160363:229   | 5430405G05Rik | INSIDE                 | 0.414                                                        | 20.142                         | 865.66             | 17436.07           | 8.329                          | 692.57             | 5768.25            |
| A_68_P21745337 | chr2:151528077-151528121                          | NM_001160363:355   | 5430405G05Rik | INSIDE                 | 0.626                                                        | 18.680                         | 1901.24            | 35515.48           | 11.687                         | 1833.46            | 21427.83           |
| A_68_P21745340 | chr2:151528389-151528433                          | NM_001160363:667   | 5430405G05Rik | INSIDE                 | 0.557                                                        | 2.670                          | 1058.13            | 2825.19            | 1.486                          | 1028.10            | 1527.83            |
| A_68_P20977353 | chr2:6021946-6021990                              | NM_001159657:29263 | 5430407P10Rik | INSIDE                 | 0.387                                                        | 0.511                          | 1170.39            | 598.38             | 0.198                          | 969.34             | 191.68             |
| A_68_P20977349 | chr2:6021517-6021561                              | NM_001159657:29693 | 5430407P10Rik | INSIDE                 | 0.639                                                        | 2.809                          | 903.63             | 2538.23            | 1.795                          | 784.06             | 1407.65            |
| A_68_P23929552 | chr5:100858837-100858881                          | NR_034038:-304     | 5430416N02Rik | PROMOTER               | 0.454                                                        | 11.518                         | 2144.98            | 24705.80           | 5.225                          | 1707.24            | 8920.56            |
| A_68_P30512103 | chr16:4789758-4789802                             | NM_025670:155      | 5730403B10Rik | INSIDE                 | 0.426                                                        | 0.610                          | 846.47             | 516.51             | 0.26                           | 668.47             | 173.70             |
| A_68_P24449884 | chr6:52266647-52266691                            | NR_038163:-1842    | 5730457N03Rik | PROMOTER               | 0.325                                                        | 32.887                         | 5660.32            | 186149.80          | 10.674                         | 6988.23            | 74592.23           |
| A_68_P24449885 | chr6:52266776-52266820                            | NR_038163:-1972    | 5730457N03Rik | PROMOTER               | 0.389                                                        | 3.486                          | 3115.10            | 10858.31           | 1.356                          | 2667.11            | 3616.05            |
| A_68_P29560848 | chr14:41827140-41827184                           | NM_027464:-98      | 5730469M10Rik | PROMOTER               | 0.443                                                        | 4.406                          | 3776.91            | 16641.06           | 1.953                          | 2973.02            | 5807.35            |
| A_68_P22900661 | chr4:48552753-48552797                            | NM_001145925:-43   | 5730528L13Rik | PROMOTER               | 0.377                                                        | 5.359                          | 894.57             | 4793.54            | 2.019                          | 781.89             | 1578.86            |
| A_68_P20644756 | chr1:138131091-138131135                          | NM_028872:-271     | 5730559C18Rik | PROMOTER               | 0.512                                                        | 12.396                         | 1340.75            | 16620.30           | 6.341                          | 1120.49            | 7105.00            |
| A_68_P25262388 | chr7:86804881-86804936                            | NM_029835:-173     | 5730590G19Rik | PROMOTER               | 0.633                                                        | 0.364                          | 1754.72            | 638.28             | 0.23                           | 1248.25            | 287.37             |
| A_68_P24084071 | chr5:129106177-129106221                          | NR_015517:364      | 5930412G12Rik | INSIDE                 | 0.153                                                        | 12.632                         | 1774.27            | 22412.96           | 1.93                           | 1777.21            | 3429.83            |
| A_68_P26548139 | chr9:58335761-58335806                            | NM_176921:-626     | 6030419C18Rik | PROMOTER               | 0.642                                                        | 2.354                          | 2896.69            | 6817.76            | 1.51                           | 2250.70            | 3399.63            |
| A_68_P31498901 | chr18:12279785-12279829                           | NM_178801:156      | 6030446N20Rik | INSIDE                 | 0.448                                                        | 3.896                          | 3053.93            | 11896.78           | 1.743                          | 2526.64            | 4405.01            |
| A_68_P30024033 | chr15:12754220-12754264                           | NM_029998:170      | 6030458C11Rik | INSIDE                 | 0.595                                                        | 3.345                          | 693.19             | 2318.72            | 1.989                          | 656.81             | 1306.52            |
| A_68_P29448465 | chr14:21522444-21522488                           | NR_029446:-145     | 6230400D17Rik | PROMOTER               | 0.468                                                        | 0.323                          | 1645.00            | 532.03             | 0.151                          | 1261.05            | 190.70             |
| A_68_P22775538 | chr4:21858442-21858486                            | NM_175234:-8       | 6230409E13Rik | PROMOTER               | 0.569                                                        | 0.676                          | 1276.62            | 862.71             | 0.384                          | 1092.81            | 420.01             |
| A_68_P20876218 | chr1:182413556-182413600                          | NM_001081227:57    | 6330403A02Rik | INSIDE                 | 0.551                                                        | 4.214                          | 813.99             | 3429.87            | 2.323                          | 728.06             | 1691.63            |
| A_68_P27904028 | chr11:70846735-70846779                           | NM_134022:363      | 6330403K07Rik | INSIDE                 | 0.42                                                         | 0.698                          | 1171.70            | 818.22             | 0.293                          | 1047.41            | 307.28             |
| A_68_P27033509 | chr10:28867346-28867390                           | NM_026138:3567     | 6330407J23Rik | INSIDE                 | 0.427                                                        | 3.281                          | 1918.23            | 6294.25            | 1.402                          | 1574.78            | 2208.06            |
| A_68_P24975023 | chr7:13863906-13863950                            | NM_177312:142      | 6330408A02Rik | INSIDE                 | 0.233                                                        | 0.339                          | 2773.65            | 938.92             | 0.079                          | 2174.10            | 171.52             |
| A_68_P29650713 | chr14:62175501-62175545                           | NM_025697:201      | 6330409N04Rik | INSIDE                 | 0.408                                                        | 6.421                          | 927.64             | 5956.72            | 2.621                          | 894.46             | 2344.18            |
| A_68_P32151692 | chr19:47806456-47806500                           | NM_026377:233      | 6330577E15Rik | INSIDE                 | 0.107                                                        | 19.388                         | 9292.34            | 180158.90          | 2.078                          | 7852.04            | 16319.65           |
| A_68_P32151687 | chr19:47805901-47805945                           | NM_026377:-323     | 6330577E15Rik | PROMOTER               | 0.661                                                        | 0.569                          | 2178.86            | 1240.65            | 0.376                          | 1857.58            | 698.66             |
| A_68_P32151689 | chr19:47806170-47806214                           | NM_026377:-53      | 6330577E15Rik | PROMOTER               | 0.475                                                        | 3.228                          | 1120.34            | 3616.73            | 1.534                          | 1005.05            | 1542.23            |
| A_68_P20153982 | chr1:37486790-37486834                            | NM_198006:136      | 6330578E17Rik | INSIDE                 | 0.645                                                        | 2.897                          | 3632.44            | 10521.95           | 1.868                          | 3140.86            | 5865.68            |
| A_68_P21768923 | chr2:155833524-155833568                          | NM_001145351:-3383 | 6430550D23Rik | PROMOTER               | 0.381                                                        | 3.867                          | 2009.01            | 7768.81            | 1.472                          | 1535.66            | 2260.06            |
| A_68_P24127315 | chr5:138182692-138182736                          | NM_175521:-1488    | 6430598A04Rik | DIVERGENT_PROMOTER     | 0.432                                                        | 6.769                          | 1366.60            | 9250.50            | 2.926                          | 1105.91            | 3236.33            |
| A_68_P24127316 | chr5:138182800-138182844                          | NM_175521:-1596    | 6430598A04Rik | DIVERGENT_PROMOTER     | 0.647                                                        | 0.502                          | 1555.06            | 781.16             | 0.325                          | 1189.41            | 386.53             |
| A_68_P22942710 | chr4:57003066-57003110                            | NM_001142965:175   | 6430704M03Rik | INSIDE                 | 0.655                                                        | 4.430                          | 734.50             | 3254.16            | 2.903                          | 688.12             | 1997.39            |
| A_68_P28432829 | chr12:53107422-53107466                           | NM_029545:44       | 6530401N04Rik | INSIDE                 | 0.614                                                        | 2.899                          | 2712.77            | 7864.76            | 1.78                           | 2335.39            | 4157.74            |
| A_68_P22398705 | chr3:105508370-105508414                          | NM_001163356:17    | 6530418L21Rik | INSIDE                 | 0.395                                                        | 0.338                          | 7539.28            | 2546.69            | 0.133                          | 5237.21            | 698.74             |
| A_68_P29587993 | chr14:49066241-49066285                           | NM_172600:236      | 6720456H20Rik | INSIDE                 | 0.489                                                        | 4.844                          | 2698.79            | 13072.53           | 2.37                           | 2203.73            | 5222.74            |
| A_68_P24865610 | chr6:135148284-135148328                          | NM_028982:302      | 8430419L09Rik | INSIDE                 | 0.396                                                        | 0.173                          | 8152.51            | 1412.26            | 0.069                          | 5756.16            | 395.29             |
| A_68_P24865609 | chr6:135148088-135148132                          | NM_028982:106      | 8430419L09Rik | INSIDE                 | 0.552                                                        | 0.455                          | 1043.94            | 475.10             | 0.251                          | 901.67             | 226.65             |
| A_68_P24865608 | chr6:135147953-135147997                          | NM_028982:-30      | 8430419L09Rik | PROMOTER               | 0.49                                                         | 0.624                          | 1638.97            | 1022.74            | 0.306                          | 1440.46            | 440.72             |
| A_68_P21754954 | chr2:153270097-153270141                          | NM_001001986:97    | 8430427H17Rik | INSIDE                 | 0.34                                                         | 15.947                         | 1524.27            | 24307.79           | 5.423                          | 1211.23            | 6568.42            |
| A_68_P21755504 | chr2:153354420-153354464                          | NM_001134300:1265  | 8430427H17Rik | INSIDE                 | 0.353                                                        | 15.970                         | 2629.12            | 41985.91           | 5.633                          | 2617.76            | 14746.51           |
| A_68_P31063014 | chr17:15115872-15115916                           | NM_001123370:67    | 9030025P20Rik | INSIDE                 | 0.297                                                        | 0.190                          | 5350.74            | 1016.67            | 0.056                          | 3868.14            | 218.24             |



| ProbeName      | Target position of probe on CpG island microarray | TargetID           | GeneSymbol    | CpG island Description | Ratio of relative methylation (TiO <sub>2</sub> -NP/Vehicle) | Sham group                     |                    |                    | TiO <sub>2</sub> -H group      |                    |                    |
|----------------|---------------------------------------------------|--------------------|---------------|------------------------|--------------------------------------------------------------|--------------------------------|--------------------|--------------------|--------------------------------|--------------------|--------------------|
|                |                                                   |                    |               |                        |                                                              | Relative methylation (Cy5/Cy3) | Cy3 signal (Input) | Cy5 signal (MeDIP) | Relative methylation (Cy5/Cy3) | Cy3 signal (Input) | Cy5 signal (MeDIP) |
| A_68_P27085191 | chr10:40402970-40403014                           | NM_177793:-95      | 9030224M15Rik | PROMOTER               | 0.561                                                        | 3.021                          | 1109.71            | 3352.53            | 1.695                          | 1022.03            | 1732.70            |
| A_68_P23368580 | chr4:141795400-141795444                          | NM_001109685:-106  | 9030409G11Rik | PROMOTER               | 0.435                                                        | 7.664                          | 10908.84           | 83610.59           | 3.336                          | 8606.03            | 28713.45           |
| A_68_P23368575 | chr4:141794726-141794770                          | NM_001109685:568   | 9030409G11Rik | INSIDE                 | 0.509                                                        | 3.044                          | 4070.25            | 12388.06           | 1.548                          | 2992.29            | 4632.87            |
| A_68_P20250394 | chr1:57028750-57028794                            | NR_024325:460      | 9130024F11Rik | INSIDE                 | 0.087                                                        | 3.974                          | 4998.22            | 19864.48           | 0.347                          | 3628.93            | 1258.03            |
| A_68_P20250396 | chr1:57029009-57029053                            | NR_024325:718      | 9130024F11Rik | INSIDE                 | 0.392                                                        | 0.442                          | 6235.38            | 2754.46            | 0.173                          | 4443.29            | 769.27             |
| A_68_P20250410 | chr1:57030392-57030436                            | NR_024325:2102     | 9130024F11Rik | INSIDE                 | 0.421                                                        | 0.290                          | 3601.06            | 1042.85            | 0.122                          | 2429.87            | 296.18             |
| A_68_P20250391 | chr1:57028519-57028563                            | NR_024325:228      | 9130024F11Rik | INSIDE                 | 0.513                                                        | 0.474                          | 2584.21            | 1225.07            | 0.243                          | 1644.22            | 399.83             |
| A_68_P20250392 | chr1:57028581-57028634                            | NR_024325:295      | 9130024F11Rik | INSIDE                 | 0.068                                                        | 1.376                          | 2806.24            | 3861.82            | 0.094                          | 1846.97            | 173.23             |
| A_68_P23693365 | chr5:52581836-52581880                            | NR_015537:-61      | 9230114K14Rik | DIVERGENT_PROMOTER     | 0.351                                                        | 14.399                         | 1320.14            | 19008.26           | 5.052                          | 1117.46            | 5645.56            |
| A_68_P28513307 | chr12:70298223-70298267                           | NR_033222:47       | 9330151L19Rik | INSIDE                 | 0.601                                                        | 8.655                          | 2343.72            | 20285.59           | 5.198                          | 1998.27            | 10386.54           |
| A_68_P21782539 | chr2:158187061-158187105                          | NR_015463:163      | 9430008C03Rik | INSIDE                 | 0.315                                                        | 13.900                         | 6040.54            | 83965.14           | 4.378                          | 4926.39            | 21565.57           |
| A_68_P21782542 | chr2:158187327-158187371                          | NR_027887:-90      | 9430008C03Rik | PROMOTER               | 0.39                                                         | 9.977                          | 1192.13            | 11894.08           | 3.888                          | 940.06             | 3654.81            |
| A_68_P31464043 | chr18:4635545-4635589                             | NM_001081963:640   | 9430020K01Rik | INSIDE                 | 0.329                                                        | 5.007                          | 2728.23            | 13659.77           | 1.645                          | 2297.16            | 3779.72            |
| A_68_P29030706 | chr13:51195741-51195786                           | NR_029463:333      | 9430083A17Rik | INSIDE                 | 0.542                                                        | 11.443                         | 243.50             | 2786.48            | 6.202                          | 237.92             | 1475.57            |
| A_68_P23562830 | chr5:28784867-28784911                            | NR_015562:-8635    | 9530036O11Rik | PROMOTER               | 0.435                                                        | 5.693                          | 587.72             | 3345.70            | 2.479                          | 537.67             | 1332.75            |
| A_68_P23562834 | chr5:28785352-28785396                            | NR_015562:-8149    | 9530036O11Rik | PROMOTER               | 0.289                                                        | 1.376                          | 5354.77            | 7366.28            | 0.398                          | 4087.02            | 1627.39            |
| A_68_P26890105 | chr9:122478146-122478190                          | NR_015610:-3450    | 9530059O14Rik | PROMOTER               | 0.305                                                        | 8.373                          | 1958.09            | 16394.35           | 2.556                          | 1703.37            | 4353.59            |
| A_68_P21774858 | chr2:156866344-156866388                          | NM_001164663:38635 | 9830001H06Rik | INSIDE                 | 0.345                                                        | 8.278                          | 2336.30            | 19340.03           | 2.854                          | 2678.90            | 7644.26            |
| A_68_P21775097 | chr2:156904527-156904571                          | NM_001164663:453   | 9830001H06Rik | INSIDE                 | 0.548                                                        | 10.682                         | 1791.92            | 19141.11           | 5.854                          | 1483.11            | 8682.49            |
| A_68_P21774859 | chr2:156866427-156866471                          | NM_001164663:38553 | 9830001H06Rik | INSIDE                 | 0.606                                                        | 2.537                          | 2468.10            | 6261.64            | 1.538                          | 1852.39            | 2849.10            |
| A_68_P21775102 | chr2:156905117-156905161                          | NM_001164663:-137  | 9830001H06Rik | DIVERGENT_PROMOTER     | 0.521                                                        | 3.100                          | 1370.11            | 4247.33            | 1.616                          | 1200.61            | 1939.79            |
| A_68_P25286563 | chr7:91234999-91235044                            | NM_030728:-6       | 9930013L23Rik | PROMOTER               | 0.625                                                        | 2.643                          | 895.40             | 2366.88            | 1.652                          | 751.30             | 1240.87            |
| A_68_P20935796 | chr1:192849520-192849564                          | NR_027298:313      | A230020J21Rik | INSIDE                 | 0.46                                                         | 0.403                          | 1235.90            | 498.64             | 0.186                          | 925.32             | 171.78             |
| A_68_P23328301 | chr4:134954162-134954206                          | NM_001168500:-42   | A330049M08Rik | PROMOTER               | 0.455                                                        | 4.333                          | 11820.36           | 51214.19           | 1.972                          | 8731.04            | 17213.40           |
| A_68_P23328300 | chr4:134954050-134954094                          | NM_001168500:70    | A330049M08Rik | INSIDE                 | 0.279                                                        | 1.589                          | 3477.73            | 5525.60            | 0.443                          | 2580.05            | 1142.57            |
| A_68_P31323978 | chr17:69788959-69789003                           | NM_001145192:315   | A330050F15Rik | INSIDE                 | 0.527                                                        | 0.286                          | 3149.85            | 900.08             | 0.151                          | 2349.25            | 353.74             |
| A_68_P31323979 | chr17:69789105-69789149                           | NM_001145192:461   | A330050F15Rik | INSIDE                 | 0.607                                                        | 0.602                          | 2965.92            | 1786.04            | 0.366                          | 2133.31            | 779.92             |
| A_68_P31145425 | chr17:32533548-32533592                           | NR_029458:-6388    | A530088E08Rik | PROMOTER               | 0.494                                                        | 8.298                          | 2965.78            | 24608.92           | 4.103                          | 2866.23            | 11759.69           |
| A_68_P30544728 | chr16:10835113-10835157                           | NM_001162932:-17   | A630055G03Rik | PROMOTER               | 0.474                                                        | 9.219                          | 1385.83            | 12502.07           | 4.277                          | 1221.79            | 5225.51            |
| A_68_P30544729 | chr16:10835253-10835297                           | NM_001162932:123   | A630055G03Rik | INSIDE                 | 0.63                                                         | 3.750                          | 529.88             | 1987.11            | 2.363                          | 479.89             | 1134.18            |
| A_68_P32775148 | chrX:155970504-155970548                          | NM_001033472:-73   | A830080D01Rik | PROMOTER               | 0.449                                                        | 8.810                          | 1244.67            | 10965.40           | 3.954                          | 1741.13            | 6884.87            |
| A_68_P32775150 | chrX:155970813-155970857                          | NM_001033472:235   | A830080D01Rik | INSIDE                 | 0.535                                                        | 3.579                          | 5281.92            | 18903.55           | 1.916                          | 6763.38            | 12955.47           |
| A_68_P32775152 | chrX:155971013-155971057                          | NM_001033472:435   | A830080D01Rik | INSIDE                 | 0.632                                                        | 5.013                          | 1249.98            | 6266.55            | 3.167                          | 1311.38            | 4153.46            |
| A_68_P31112027 | chr17:26853342-26853387                           | NM_029870:770      | A930001N09Rik | INSIDE                 | 0.222                                                        | 9.481                          | 2988.35            | 28333.07           | 2.108                          | 2724.46            | 5743.83            |
| A_68_P31112025 | chr17:26853064-26853108                           | NM_029870:492      | A930001N09Rik | INSIDE                 | 0.623                                                        | 0.244                          | 2944.73            | 719.98             | 0.152                          | 2263.71            | 345.07             |
| A_68_P24067083 | chr5:125956377-125956421                          | NM_030210:156      | Aaes          | INSIDE                 | 0.456                                                        | 0.609                          | 1505.37            | 916.83             | 0.277                          | 1014.28            | 281.41             |
| A_68_P20347697 | chr1:74331425-74331469                            | NM_001190444:-134  | Aamp          | DIVERGENT_PROMOTER     | 0.311                                                        | 1.956                          | 1382.44            | 2703.47            | 0.608                          | 1160.16            | 705.17             |
| A_68_P30214228 | chr15:51872101-51872145                           | NM_175503:470      | Aard          | INSIDE                 | 0.33                                                         | 0.363                          | 1833.53            | 666.26             | 0.12                           | 1470.65            | 176.19             |
| A_68_P31201456 | chr17:45643922-45643966                           | NM_198608:155      | Aars2         | INSIDE                 | 0.589                                                        | 3.280                          | 1352.65            | 4436.65            | 1.931                          | 1224.60            | 2364.99            |
| A_68_P27977895 | chr11:84326684-84326729                           | NM_019816:297      | Aatf          | INSIDE                 | 0.532                                                        | 0.513                          | 1343.60            | 689.59             | 0.273                          | 993.92             | 271.49             |
| A_68_P28181737 | chr11:119873242-119873286                         | NM_001198787:29831 | Aatk          | INSIDE                 | 0.223                                                        | 9.494                          | 1091.57            | 10363.65           | 2.121                          | 837.54             | 1776.42            |
| A_68_P21072052 | chr2:25283953-25283999                            | NM_007379:-217     | Abca2         | PROMOTER               | 0.468                                                        | 12.385                         | 688.42             | 8525.77            | 5.8                            | 657.22             | 3811.98            |
| A_68_P31096787 | chr17:24488644-24488688                           | NM_001039581:-324  | Abca3         | DIVERGENT_PROMOTER     | 0.307                                                        | 0.629                          | 1054.47            | 662.77             | 0.193                          | 912.62             | 176.34             |
| A_68_P28123546 | chr11:110199057-110199101                         | NM_147219:-48      | Abca5         | PROMOTER               | 0.193                                                        | 28.600                         | 4304.62            | 123110.20          | 5.525                          | 3432.27            | 18964.49           |
| A_68_P23470075 | chr5:8893888-8893932                              | NM_008830:190      | Abcb4         | INSIDE                 | 0.632                                                        | 2.735                          | 1821.91            | 4982.46            | 1.729                          | 1451.87            | 2510.25            |
| A_68_P24059257 | chr5:124539964-124540008                          | NM_019875:5821     | Abcb9         | INSIDE                 | 0.648                                                        | 3.275                          | 1372.73            | 4495.88            | 2.122                          | 1172.09            | 2486.79            |

| ProbeName      | Target position of probe on CpG island microarray | TargetID          | GeneSymbol | CpG island Description | Ratio of relative methylation (TiO <sub>2</sub> -NP/Vehicle) | Sham group                     |                    |                    | TiO <sub>2</sub> -H group      |                    |                    |
|----------------|---------------------------------------------------|-------------------|------------|------------------------|--------------------------------------------------------------|--------------------------------|--------------------|--------------------|--------------------------------|--------------------|--------------------|
|                |                                                   |                   |            |                        |                                                              | Relative methylation (Cy5/Cy3) | Cy3 signal (Input) | Cy5 signal (MeDIP) | Relative methylation (Cy5/Cy3) | Cy3 signal (Input) | Cy5 signal (MeDIP) |
| A_68_P30561772 | chr16:14361819-14361863                           | NM_008576:188     | Abcc1      | INSIDE                 | 0.649                                                        | 0.465                          | 2399.02            | 1115.25            | 0.302                          | 2018.61            | 608.78             |
| A_68_P31206433 | chr17:46465374-46465418                           | NM_170680:-424    | Abcc10     | PROMOTER               | 0.325                                                        | 1.510                          | 1023.88            | 1545.60            | 0.491                          | 741.71             | 364.19             |
| A_68_P30587614 | chr16:20426497-20426541                           | NM_013790:-51     | Abcc5      | PROMOTER               | 0.446                                                        | 0.149                          | 3980.46            | 592.90             | 0.066                          | 2583.49            | 171.52             |
| A_68_P30587610 | chr16:20425965-20426009                           | NM_013790:481     | Abcc5      | INSIDE                 | 0.456                                                        | 4.688                          | 1781.22            | 8349.73            | 2.14                           | 1678.92            | 3592.54            |
| A_68_P30587612 | chr16:20426260-20426304                           | NM_013790:185     | Abcc5      | INSIDE                 | 0.488                                                        | 0.661                          | 6535.26            | 4323.00            | 0.323                          | 4301.89            | 1389.87            |
| A_68_P30587611 | chr16:20426129-20426173                           | NM_013790:317     | Abcc5      | INSIDE                 | 0.4                                                          | 1.527                          | 3873.60            | 5914.24            | 0.611                          | 2762.02            | 1687.66            |
| A_68_P25097409 | chr7:53435456-53435500                            | NM_011510:-75     | Abcc8      | PROMOTER               | 0.211                                                        | 10.991                         | 868.03             | 9540.31            | 2.316                          | 845.85             | 1958.92            |
| A_68_P25097408 | chr7:53435337-53435381                            | NM_011510:45      | Abcc8      | INSIDE                 | 0.394                                                        | 3.680                          | 3191.16            | 11742.49           | 1.449                          | 2597.83            | 3763.60            |
| A_68_P30434242 | chr15:91029845-91029889                           | NM_011994:-7628   | Abcd2      | PROMOTER               | 0.511                                                        | 3.289                          | 1802.31            | 5928.32            | 1.68                           | 1425.20            | 2394.89            |
| A_68_P30434244 | chr15:91030048-91030092                           | NM_011994:-7832   | Abcd2      | PROMOTER               | 0.353                                                        | 4.181                          | 1559.98            | 6521.97            | 1.475                          | 1187.10            | 1750.55            |
| A_68_P23542799 | chr5:24082860-24082904                            | NM_001190443:403  | Abcf2      | INSIDE                 | 0.238                                                        | 0.441                          | 2298.50            | 1014.34            | 0.105                          | 1800.07            | 189.21             |
| A_68_P23542802 | chr5:24083177-24083221                            | NM_001190443:87   | Abcf2      | INSIDE                 | 0.523                                                        | 0.456                          | 1401.12            | 639.59             | 0.239                          | 1048.19            | 250.16             |
| A_68_P23542801 | chr5:24083043-24083087                            | NM_001190443:221  | Abcf2      | INSIDE                 | 0.598                                                        | 0.617                          | 2165.02            | 1336.73            | 0.369                          | 1585.70            | 585.27             |
| A_68_P24482547 | chr6:58590413-58590457                            | NM_011920:43769   | Abcg2      | INSIDE                 | 0.364                                                        | 13.674                         | 2132.76            | 29163.25           | 4.971                          | 1835.40            | 9124.50            |
| A_68_P26466788 | chr9:44096508-44096552                            | NM_138955:-203    | Abeg4      | PROMOTER               | 0.419                                                        | 0.651                          | 784.60             | 511.03             | 0.273                          | 677.70             | 184.97             |
| A_68_P30728224 | chr16:45742850-45742894                           | NM_172511:147     | Abhd10     | INSIDE                 | 0.408                                                        | 3.767                          | 1804.01            | 6796.54            | 1.535                          | 1312.07            | 2014.55            |
| A_68_P21741665 | chr2:150730549-150730593                          | NM_024465:-103    | Abhd12     | DIVERGENT_PROMOTER     | 0.161                                                        | 12.406                         | 2948.48            | 36577.49           | 1.997                          | 2591.65            | 5175.81            |
| A_68_P21741661 | chr2:150730134-150730178                          | NM_024465:311     | Abhd12     | INSIDE                 | 0.349                                                        | 4.539                          | 1488.11            | 6754.93            | 1.583                          | 1203.26            | 1905.06            |
| A_68_P31157494 | chr17:35226276-35226320                           | NM_178592:63      | Abhd16a    | INSIDE                 | 0.185                                                        | 10.981                         | 1474.84            | 16195.54           | 2.036                          | 1176.35            | 2395.02            |
| A_68_P25260061 | chr7:86418376-86418420                            | NM_018811:247     | Abhd2      | INSIDE                 | 0.428                                                        | 0.621                          | 867.94             | 538.88             | 0.265                          | 674.24             | 179.01             |
| A_68_P26888896 | chr9:122260961-122261005                          | NM_026179:249     | Abhd5      | INSIDE                 | 0.416                                                        | 0.558                          | 1766.53            | 985.47             | 0.232                          | 1487.00            | 344.76             |
| A_68_P25956922 | chr8:73987506-73987550                            | NM_022419:28      | Abhd8      | INSIDE                 | 0.417                                                        | 4.380                          | 1305.59            | 5718.73            | 1.827                          | 1118.59            | 2043.21            |
| A_68_P20268943 | chr1:60466325-60466369                            | NM_001198570:-116 | Abi2       | PROMOTER               | 0.191                                                        | 20.240                         | 2155.76            | 43633.57           | 3.857                          | 1818.21            | 7012.76            |
| A_68_P20268947 | chr1:60467002-60467046                            | NM_001198570:562  | Abi2       | INSIDE                 | 0.269                                                        | 18.882                         | 2938.62            | 55485.91           | 5.082                          | 2271.72            | 11545.38           |
| A_68_P20268944 | chr1:60466493-60466537                            | NM_001198570:52   | Abi2       | INSIDE                 | 0.384                                                        | 8.229                          | 1999.68            | 16456.23           | 3.161                          | 1649.21            | 5213.60            |
| A_68_P20743647 | chr1:158488894-158488938                          | NM_001136104:-1   | Abi2       | PROMOTER               | 0.278                                                        | 1.413                          | 1089.66            | 1539.71            | 0.393                          | 1204.40            | 472.87             |
| A_68_P20743645 | chr1:158488645-158488689                          | NM_001136104:-251 | Abi2       | PROMOTER               | 0.208                                                        | 8.574                          | 846.92             | 7261.64            | 1.786                          | 779.47             | 1392.18            |
| A_68_P31760609 | chr18:62071314-62071358                           | NM_198649:142     | Abli3      | INSIDE                 | 0.321                                                        | 6.985                          | 2009.44            | 14035.49           | 2.243                          | 1716.82            | 3851.10            |
| A_68_P27932045 | chr11:76250435-76250479                           | NM_198018:72465   | Abr        | INSIDE                 | 0.42                                                         | 0.301                          | 3809.14            | 1147.32            | 0.127                          | 2811.21            | 355.79             |
| A_68_P27932457 | chr11:76308492-76308536                           | NM_198018:14407   | Abr        | INSIDE                 | 0.654                                                        | 24.286                         | 20433.25           | 496239.40          | 15.881                         | 18206.94           | 289136.50          |
| A_68_P27932872 | chr11:76384849-76384893                           | NM_198895:6       | Abr        | INSIDE                 | 0.195                                                        | 8.247                          | 3599.00            | 29682.05           | 1.606                          | 3012.20            | 4837.66            |
| A_68_P27932455 | chr11:76308282-76308326                           | NM_198018:14617   | Abr        | INSIDE                 | 0.5                                                          | 3.301                          | 1781.90            | 5882.76            | 1.651                          | 1563.03            | 2580.68            |
| A_68_P24624506 | chr6:88791877-88791921                            | NM_030251:31      | Abtb1      | INSIDE                 | 0.124                                                        | 37.885                         | 9805.17            | 371466.50          | 4.683                          | 10691.92           | 50073.97           |
| A_68_P24624511 | chr6:88792507-88792551                            | NM_030251:-599    | Abtb1      | PROMOTER               | 0.201                                                        | 0.434                          | 5265.31            | 2284.86            | 0.087                          | 3137.11            | 273.21             |
| A_68_P24624504 | chr6:88791715-88791759                            | NM_030251:193     | Abtb1      | INSIDE                 | 0.3                                                          | 11.270                         | 9526.24            | 107362.30          | 3.382                          | 7628.62            | 25797.35           |
| A_68_P24624505 | chr6:88791782-88791826                            | NM_030251:125     | Abtb1      | INSIDE                 | 0.513                                                        | 0.161                          | 3405.66            | 548.69             | 0.083                          | 2112.72            | 174.61             |
| A_68_P21483985 | chr2:103406320-103406364                          | NM_178890:-124    | Abtb2      | PROMOTER               | 0.578                                                        | 0.293                          | 2483.28            | 727.91             | 0.169                          | 1671.15            | 283.13             |
| A_68_P26373433 | chr9:26807126-26807170                            | NM_025862:-14     | Acad8      | DIVERGENT_PROMOTER     | 0.085                                                        | 46.477                         | 10292.91           | 478382.00          | 3.964                          | 13011.26           | 51578.85           |
| A_68_P22056456 | chr3:35965277-35965321                            | NM_172678:377     | Acad9      | INSIDE                 | 0.253                                                        | 0.564                          | 1862.65            | 1051.07            | 0.143                          | 1429.68            | 203.97             |
| A_68_P20305039 | chr1:66909588-66909632                            | NM_007381:231     | Acad1      | INSIDE                 | 0.575                                                        | 3.758                          | 935.73             | 3516.79            | 2.16                           | 782.49             | 1690.29            |
| A_68_P22659834 | chr3:153607495-153607539                          | NM_007382:-120    | Acadm      | PROMOTER               | 0.271                                                        | 11.696                         | 2846.65            | 33295.55           | 3.166                          | 2317.47            | 7337.93            |
| A_68_P22659830 | chr3:153607153-153607197                          | NM_007382:222     | Acadm      | INSIDE                 | 0.588                                                        | 0.467                          | 1215.68            | 567.55             | 0.274                          | 947.82             | 260.04             |
| A_68_P22659832 | chr3:153607334-153607378                          | NM_007382:40      | Acadm      | INSIDE                 | 0.462                                                        | 3.567                          | 5083.96            | 18135.71           | 1.647                          | 3891.89            | 6410.63            |
| A_68_P24007907 | chr5:115569084-115569128                          | NM_007383:216     | Acads      | INSIDE                 | 0.349                                                        | 0.341                          | 2380.75            | 811.91             | 0.119                          | 1669.73            | 198.93             |
| A_68_P24007906 | chr5:115568969-115569013                          | NM_007383:332     | Acads      | INSIDE                 | 0.285                                                        | 1.619                          | 1200.83            | 1943.93            | 0.461                          | 916.08             | 422.71             |
| A_68_P23441289 | chr4:155266283-155266327                          | NM_207223:321     | Acap3      | INSIDE                 | 0.622                                                        | 5.053                          | 2175.04            | 10991.38           | 3.141                          | 1723.05            | 5411.89            |

| ProbeName      | Target position of probe on CpG island microarray | TargetID           | GeneSymbol | CpG island Description | Ratio of relative methylation (TiO <sub>2</sub> -NP/Vehicle) | Sham group                     |                    |                    | TiO <sub>2</sub> -H group      |                    |                    |
|----------------|---------------------------------------------------|--------------------|------------|------------------------|--------------------------------------------------------------|--------------------------------|--------------------|--------------------|--------------------------------|--------------------|--------------------|
|                |                                                   |                    |            |                        |                                                              | Relative methylation (Cy5/Cy3) | Cy3 signal (Input) | Cy5 signal (MeDIP) | Relative methylation (Cy5/Cy3) | Cy3 signal (Input) | Cy5 signal (MeDIP) |
| A_68_P23441288 | chr4:155266214-155266258                          | NM_207223:253      | Acap3      | INSIDE                 | 0.646                                                        | 0.434                          | 2115.65            | 917.93             | 0.28                           | 1581.50            | 442.94             |
| A_68_P26521623 | chr9:53418301-53418345                            | NM_144784:133      | Acat1      | INSIDE                 | 0.466                                                        | 6.674                          | 1035.36            | 6910.10            | 3.109                          | 938.27             | 2917.09            |
| A_68_P20877466 | chr1:182655892-182655936                          | NM_133225:-259     | Acdb3      | PROMOTER               | 0.457                                                        | 8.506                          | 1640.98            | 13958.40           | 3.885                          | 1430.10            | 5555.96            |
| A_68_P21061287 | chr2:22924684-22924728                            | NM_001102437:115   | Acdb5      | INSIDE                 | 0.509                                                        | 0.422                          | 4880.74            | 2061.20            | 0.215                          | 3409.42            | 733.55             |
| A_68_P27958478 | chr11:80966575-80966619                           | NM_007384:-191     | Accn1      | PROMOTER               | 0.327                                                        | 0.219                          | 3368.86            | 737.49             | 0.072                          | 2443.47            | 174.71             |
| A_68_P27958467 | chr11:80965329-80965373                           | NM_007384:1055     | Accn1      | INSIDE                 | 0.328                                                        | 0.455                          | 1458.90            | 663.31             | 0.149                          | 1177.51            | 175.64             |
| A_68_P27958470 | chr11:80965747-80965791                           | NM_007384:637      | Accn1      | INSIDE                 | 0.374                                                        | 0.527                          | 3011.26            | 1587.14            | 0.197                          | 2171.28            | 427.88             |
| A_68_P27963498 | chr11:81782179-81782223                           | NM_001034013:-302  | Accn1      | PROMOTER               | 0.556                                                        | 0.190                          | 2414.38            | 458.68             | 0.106                          | 1800.33            | 190.27             |
| A_68_P27958482 | chr11:80967088-80967132                           | NM_007384:-705     | Accn1      | PROMOTER               | 0.581                                                        | 7.212                          | 1022.38            | 7373.34            | 4.192                          | 889.70             | 3729.26            |
| A_68_P20354147 | chr1:75447265-75447309                            | NM_183022:202      | Accn4      | INSIDE                 | 0.239                                                        | 1.836                          | 1419.21            | 2605.30            | 0.439                          | 1130.84            | 496.40             |
| A_68_P28098903 | chr11:105850138-105850182                         | NM_009598:13639    | Ace        | INSIDE                 | 0.081                                                        | 38.552                         | 2160.09            | 83275.39           | 3.115                          | 1568.09            | 4884.75            |
| A_68_P28098902 | chr11:105849980-105850024                         | NM_009598:13481    | Ace        | INSIDE                 | 0.301                                                        | 5.878                          | 2272.75            | 13358.40           | 1.769                          | 1730.76            | 3061.63            |
| A_68_P28098904 | chr11:105850208-105850252                         | NM_009598:13709    | Ace        | INSIDE                 | 0.527                                                        | 2.933                          | 1280.83            | 3756.41            | 1.545                          | 1051.59            | 1625.01            |
| A_68_P23081889 | chr4:86520559-86520603                            | NM_139306:263      | Acer2      | INSIDE                 | 0.377                                                        | 0.279                          | 7623.24            | 2125.43            | 0.105                          | 5152.00            | 541.04             |
| A_68_P23081888 | chr4:86520453-86520497                            | NM_139306:157      | Acer2      | INSIDE                 | 0.492                                                        | 0.469                          | 2198.37            | 1031.55            | 0.231                          | 1543.23            | 356.01             |
| A_68_P25354926 | chr7:105457776-105457820                          | NM_025408:239      | Acer3      | INSIDE                 | 0.54                                                         | 3.192                          | 2294.20            | 7322.11            | 1.725                          | 1970.27            | 3398.56            |
| A_68_P24124994 | chr5:137735588-137735632                          | NM_009599:6106     | Ache       | INSIDE                 | 0.506                                                        | 0.300                          | 2471.09            | 741.11             | 0.152                          | 1675.60            | 254.30             |
| A_68_P28068578 | chr11:100388533-100388577                         | NM_001199296:760   | Acly       | INSIDE                 | 0.601                                                        | 0.657                          | 2071.10            | 1361.45            | 0.395                          | 1517.37            | 599.42             |
| A_68_P24219280 | chr6:6906233-6906277                              | NM_001077713:237   | Aen9       | INSIDE                 | 0.536                                                        | 0.371                          | 1940.22            | 720.39             | 0.199                          | 1437.62            | 285.88             |
| A_68_P23417004 | chr4:151552321-151552365                          | NM_001146057:-7900 | Acot7      | PROMOTER               | 0.235                                                        | 1.927                          | 2965.49            | 5714.13            | 0.454                          | 2022.42            | 917.43             |
| A_68_P23417009 | chr4:151552981-151553025                          | NM_001146057:-7240 | Acot7      | PROMOTER               | 0.547                                                        | 3.248                          | 1114.42            | 3619.68            | 1.775                          | 852.83             | 1513.89            |
| A_68_P28328448 | chr12:31596461-31596505                           | NM_001110239:-5    | Acp1       | DIVERGENT_PROMOTER     | 0.423                                                        | 10.008                         | 1462.39            | 14635.68           | 4.232                          | 1271.58            | 5381.71            |
| A_68_P26749718 | chr9:96789794-96789838                            | NM_153420:25       | Acpl2      | INSIDE                 | 0.363                                                        | 6.937                          | 1502.88            | 10424.81           | 2.519                          | 1185.95            | 2986.95            |
| A_68_P26749722 | chr9:96790253-96790298                            | NM_153420:-434     | Acpl2      | PROMOTER               | 0.648                                                        | 0.366                          | 1422.36            | 520.73             | 0.237                          | 1075.64            | 255.10             |
| A_68_P26235837 | chr8:125299586-125299630                          | NM_144932:204      | Acsf3      | INSIDE                 | 0.513                                                        | 0.345                          | 1679.65            | 578.94             | 0.177                          | 977.96             | 172.98             |
| A_68_P26235836 | chr8:125299500-125299544                          | NM_144932:118      | Acsf3      | INSIDE                 | 0.586                                                        | 0.534                          | 3722.62            | 1986.11            | 0.313                          | 2400.04            | 750.90             |
| A_68_P32707838 | chrX:138825108-138825152                          | NM_001033600:-52   | Acsf4      | PROMOTER               | 0.623                                                        | 3.089                          | 727.07             | 2245.69            | 1.924                          | 1147.89            | 2208.03            |
| A_68_P27809324 | chr11:54117377-54117421                           | NM_001033597:-307  | Acsf6      | PROMOTER               | 0.399                                                        | 0.272                          | 2485.18            | 676.57             | 0.109                          | 1730.03            | 187.78             |
| A_68_P27809326 | chr11:54117543-54117587                           | NM_001033597:-141  | Acsf6      | PROMOTER               | 0.471                                                        | 0.518                          | 1063.71            | 550.88             | 0.244                          | 915.97             | 223.54             |
| A_68_P21766024 | chr2:155343697-155343741                          | NM_019811:-60      | Acss2      | DIVERGENT_PROMOTER     | 0.455                                                        | 0.296                          | 1696.63            | 501.49             | 0.134                          | 1276.98            | 171.75             |
| A_68_P24153993 | chr5:143667831-143667875                          | NM_007393:551      | Actb       | INSIDE                 | 0.582                                                        | 0.344                          | 3766.28            | 1295.35            | 0.2                            | 3064.36            | 613.14             |
| A_68_P24153997 | chr5:143668325-143668369                          | NM_007393:57       | Actb       | INSIDE                 | 0.207                                                        | 7.938                          | 1569.73            | 12460.19           | 1.645                          | 1250.21            | 2056.44            |
| A_68_P28183961 | chr11:120209795-120209839                         | NM_009609:-18      | Actg1      | DIVERGENT_PROMOTER     | 0.17                                                         | 22.334                         | 1802.55            | 40257.46           | 3.792                          | 1559.25            | 5913.29            |
| A_68_P22039455 | chr3:32607362-32607406                            | NM_019673:-83      | Actl6a     | PROMOTER               | 0.654                                                        | 0.450                          | 7748.96            | 3484.86            | 0.294                          | 5767.13            | 1696.51            |
| A_68_P28574822 | chr12:81361237-81361281                           | NM_134156:100      | Actn1      | INSIDE                 | 0.282                                                        | 10.091                         | 900.07             | 9082.64            | 2.844                          | 1029.36            | 2927.68            |
| A_68_P28574815 | chr12:81360407-81360451                           | NM_134156:930      | Actn1      | INSIDE                 | 0.4                                                          | 0.321                          | 1626.88            | 522.96             | 0.129                          | 1389.07            | 178.65             |
| A_68_P28574819 | chr12:81360793-81360837                           | NM_134156:544      | Actn1      | INSIDE                 | 0.519                                                        | 2.905                          | 1065.60            | 3095.24            | 1.507                          | 980.57             | 1478.15            |
| A_68_P25024594 | chr7:29747163-29747207                            | NM_021895:115      | Actn4      | INSIDE                 | 0.496                                                        | 0.577                          | 2273.29            | 1312.37            | 0.286                          | 1646.55            | 471.42             |
| A_68_P25024595 | chr7:29747291-29747335                            | NM_021895:-13      | Actn4      | PROMOTER               | 0.519                                                        | 3.307                          | 788.86             | 2608.81            | 1.715                          | 661.37             | 1134.50            |
| A_68_P32143657 | chr19:46470296-46470340                           | NM_016860:-93      | Actr1a     | DIVERGENT_PROMOTER     | 0.619                                                        | 0.266                          | 1705.64            | 454.50             | 0.165                          | 1316.50            | 217.12             |
| A_68_P32143654 | chr19:46469962-46470006                           | NM_016860:241      | Actr1a     | INSIDE                 | 0.626                                                        | 6.101                          | 2936.31            | 17914.29           | 3.819                          | 2231.25            | 8522.13            |
| A_68_P27630023 | chr11:20013151-20013195                           | NM_146243:-218     | Actr2      | PROMOTER               | 0.613                                                        | 6.488                          | 5643.42            | 36613.90           | 3.977                          | 4722.07            | 18778.34           |
| A_68_P27630019 | chr11:20012621-20012665                           | NM_146243:312      | Actr2      | INSIDE                 | 0.505                                                        | 3.884                          | 912.01             | 3542.27            | 1.961                          | 838.10             | 1643.38            |
| A_68_P20584830 | chr1:127331799-127331843                          | NM_001205385:484   | Actr3      | INSIDE                 | 0.213                                                        | 9.323                          | 7326.24            | 68305.88           | 1.983                          | 6471.15            | 12830.50           |
| A_68_P23548816 | chr5:25266039-25266083                            | NM_001004365:217   | Actr3b     | INSIDE                 | 0.575                                                        | 0.510                          | 13365.79           | 6809.96            | 0.293                          | 8405.87            | 2464.47            |
| A_68_P21784024 | chr2:158450527-158450571                          | NM_175419:-100     | Actr5      | PROMOTER               | 0.402                                                        | 0.487                          | 987.30             | 481.12             | 0.196                          | 890.84             | 174.59             |

| ProbeName      | Target position of probe on CpG island microarray | TargetID           | GeneSymbol | CpG island Description | Ratio of relative methylation (TiO <sub>2</sub> -NP/Vehicle) | Sham group                     |                    |                    | TiO <sub>2</sub> -H group      |                    |                    |
|----------------|---------------------------------------------------|--------------------|------------|------------------------|--------------------------------------------------------------|--------------------------------|--------------------|--------------------|--------------------------------|--------------------|--------------------|
|                |                                                   |                    |            |                        |                                                              | Relative methylation (Cy5/Cy3) | Cy3 signal (Input) | Cy5 signal (MeDIP) | Relative methylation (Cy5/Cy3) | Cy3 signal (Input) | Cy5 signal (MeDIP) |
| A_68_P26872301 | chr9:119336521-119336565                          | NM_007397:24924    | Acvr2b     | INSIDE                 | 0.105                                                        | 5.690                          | 2145.41            | 12207.69           | 0.6                            | 1569.32            | 941.71             |
| A_68_P22061571 | chr3:36962331-36962381                            | NM_009350:-221     | Adad1      | PROMOTER               | 0.372                                                        | 6.005                          | 594.43             | 3569.71            | 2.236                          | 510.54             | 1141.75            |
| A_68_P26215030 | chr8:122136802-122136846                          | NM_029428:178      | Adad2      | INSIDE                 | 0.322                                                        | 9.233                          | 1635.36            | 15099.33           | 2.97                           | 1610.52            | 4783.79            |
| A_68_P26215029 | chr8:122136700-122136744                          | NM_029428:76       | Adad2      | INSIDE                 | 0.545                                                        | 3.493                          | 2214.01            | 7733.27            | 1.904                          | 1836.41            | 3496.37            |
| A_68_P26617803 | chr9:70527024-70527068                            | NM_007399:239      | Adam10     | INSIDE                 | 0.267                                                        | 10.858                         | 3600.90            | 39099.53           | 2.897                          | 2951.41            | 8550.85            |
| A_68_P28081367 | chr11:102635750-102635794                         | NM_001110778:13020 | Adam11     | INSIDE                 | 0.428                                                        | 0.630                          | 948.00             | 597.41             | 0.27                           | 883.23             | 238.23             |
| A_68_P22318789 | chr3:89153984-89154028                            | NM_001037722:-74   | Adam15     | PROMOTER               | 0.462                                                        | 0.568                          | 1126.74            | 640.46             | 0.262                          | 876.59             | 229.96             |
| A_68_P27765615 | chr11:45869497-45869541                           | NM_009616:30       | Adam19     | INSIDE                 | 0.476                                                        | 3.604                          | 1766.93            | 6367.84            | 1.714                          | 1434.73            | 2459.75            |
| A_68_P23467734 | chr5:8367164-8367208                              | NM_001098225:895   | Adam22     | INSIDE                 | 0.348                                                        | 7.074                          | 1703.48            | 12050.73           | 2.461                          | 1634.80            | 4023.28            |
| A_68_P23467743 | chr5:8368197-8368241                              | NM_001098225:-137  | Adam22     | PROMOTER               | 0.466                                                        | 3.883                          | 1409.38            | 5472.98            | 1.809                          | 1292.59            | 2337.86            |
| A_68_P23467741 | chr5:8368019-8368063                              | NM_001098225:41    | Adam22     | INSIDE                 | 0.6                                                          | 2.925                          | 1279.89            | 3743.97            | 1.756                          | 1108.29            | 1945.90            |
| A_68_P23467742 | chr5:8368117-8368161                              | NM_001098225:-57   | Adam22     | PROMOTER               | 0.439                                                        | 3.957                          | 773.37             | 3060.06            | 1.739                          | 688.64             | 1197.44            |
| A_68_P20286846 | chr1:63492907-63492951                            | NM_001177600:451   | Adam23     | INSIDE                 | 0.572                                                        | 3.243                          | 1742.18            | 5650.39            | 1.857                          | 1543.20            | 2865.02            |
| A_68_P25724843 | chr8:26127513-26127557                            | NM_007404:-140     | Adam9      | DIVERGENT_PROMOTER     | 0.164                                                        | 50.820                         | 1149.67            | 58426.48           | 8.358                          | 1129.13            | 9437.33            |
| A_68_P25724840 | chr8:26127185-26127229                            | NM_007404:188      | Adam9      | INSIDE                 | 0.46                                                         | 5.197                          | 3178.10            | 16516.48           | 2.388                          | 2621.45            | 6260.05            |
| A_68_P25724841 | chr8:26127277-26127321                            | NM_007404:96       | Adam9      | INSIDE                 | 0.469                                                        | 5.489                          | 3121.17            | 17133.15           | 2.573                          | 2611.31            | 6717.59            |
| A_68_P30931281 | chr16:85803417-85803461                           | NM_009621:-78      | Adams1     | PROMOTER               | 0.612                                                        | 3.544                          | 1680.14            | 5954.94            | 2.168                          | 1442.18            | 3126.07            |
| A_68_P30931279 | chr16:85803211-85803255                           | NM_009621:128      | Adams1     | INSIDE                 | 0.396                                                        | 0.557                          | 928.60             | 516.95             | 0.221                          | 779.01             | 171.88             |
| A_68_P26397647 | chr9:30730145-30730189                            | NM_001024139:-129  | Adams15    | PROMOTER               | 0.57                                                         | 0.635                          | 990.67             | 628.79             | 0.362                          | 918.15             | 332.09             |
| A_68_P26181051 | chr8:116372746-116372790                          | NM_172466:-29      | Adams18    | PROMOTER               | 0.468                                                        | 0.429                          | 1250.61            | 535.91             | 0.201                          | 855.88             | 171.75             |
| A_68_P31744364 | chr18:58997641-58997685                           | NM_175506:1245     | Adams19    | INSIDE                 | 0.609                                                        | 0.537                          | 2089.54            | 1121.74            | 0.327                          | 1682.72            | 550.13             |
| A_68_P31744348 | chr18:58995914-58995958                           | NM_175506:-481     | Adams19    | PROMOTER               | 0.666                                                        | 2.408                          | 2790.16            | 6718.95            | 1.603                          | 2237.18            | 3587.22            |
| A_68_P27789375 | chr11:50415810-50415854                           | NM_175643:246      | Adams2     | INSIDE                 | 0.495                                                        | 4.663                          | 3134.41            | 14616.63           | 2.309                          | 2632.49            | 6078.78            |
| A_68_P30452132 | chr15:94234058-94234102                           | NM_177431:701      | Adams20    | INSIDE                 | 0.56                                                         | 0.527                          | 2426.14            | 1277.97            | 0.295                          | 1737.59            | 512.40             |
| A_68_P23880187 | chr5:90311691-90311735                            | NM_001081401:647   | Adams3     | INSIDE                 | 0.256                                                        | 15.559                         | 4310.26            | 67062.79           | 3.985                          | 3567.85            | 14218.31           |
| A_68_P23880193 | chr5:90312354-90312398                            | NM_001081401:-17   | Adams3     | PROMOTER               | 0.522                                                        | 3.428                          | 3069.24            | 10522.70           | 1.789                          | 2606.52            | 4662.09            |
| A_68_P30931905 | chr16:85901365-85901412                           | NM_011782:-18      | Adams5     | PROMOTER               | 0.09                                                         | 3.717                          | 1760.58            | 6544.57            | 0.336                          | 1227.81            | 412.39             |
| A_68_P30931894 | chr16:85900162-85900206                           | NM_011782:1186     | Adams5     | INSIDE                 | 0.618                                                        | 5.067                          | 1408.34            | 7136.26            | 3.134                          | 1074.45            | 3367.18            |
| A_68_P26716242 | chr9:90057897-90057941                            | NM_001003911:103   | Adams7     | INSIDE                 | 0.564                                                        | 0.670                          | 1099.21            | 736.26             | 0.378                          | 837.57             | 316.24             |
| A_68_P25276872 | chr7:89483764-89483808                            | NM_001190374:-417  | Adams13    | PROMOTER               | 0.412                                                        | 12.407                         | 1775.57            | 22029.56           | 5.118                          | 1364.99            | 6985.33            |
| A_68_P27282648 | chr10:79811490-79811534                           | NM_001113548:-321  | Adams15    | DIVERGENT_PROMOTER     | 0.439                                                        | 0.399                          | 4796.66            | 1914.81            | 0.175                          | 3258.91            | 571.58             |
| A_68_P27282601 | chr10:79805419-79805466                           | NM_001113548:5749  | Adams15    | INSIDE                 | 0.48                                                         | 0.469                          | 5092.12            | 2389.02            | 0.225                          | 3241.64            | 729.25             |
| A_68_P27282652 | chr10:79811999-79812043                           | NM_001113548:-829  | Adams15    | DIVERGENT_PROMOTER     | 0.565                                                        | 4.071                          | 1878.52            | 7647.19            | 2.302                          | 1446.82            | 3330.61            |
| A_68_P27282596 | chr10:79804721-79804765                           | NM_001113548:6449  | Adams15    | INSIDE                 | 0.658                                                        | 0.741                          | 3042.90            | 2255.07            | 0.488                          | 2101.57            | 1024.85            |
| A_68_P27282604 | chr10:79805724-79805768                           | NM_025629:5411     | Adams15    | INSIDE                 | 0.655                                                        | 2.785                          | 896.04             | 2495.57            | 1.825                          | 800.91             | 1461.29            |
| A_68_P24134879 | chr5:139801058-139801102                          | NM_172723:338      | Adap1      | INSIDE                 | 0.541                                                        | 0.541                          | 3936.51            | 2130.59            | 0.293                          | 3112.61            | 911.92             |
| A_68_P27952852 | chr11:79967507-79967551                           | NM_172133:-135     | Adap2      | PROMOTER               | 0.418                                                        | 11.002                         | 1078.04            | 11860.86           | 4.604                          | 963.12             | 4434.12            |
| A_68_P22321213 | chr3:89519038-89519082                            | NM_001038587:117   | Adar       | INSIDE                 | 0.581                                                        | 0.288                          | 1820.27            | 524.38             | 0.167                          | 1388.06            | 232.15             |
| A_68_P22321216 | chr3:89519299-89519343                            | NM_001038587:377   | Adar       | INSIDE                 | 0.606                                                        | 3.482                          | 1073.42            | 3737.29            | 2.108                          | 956.40             | 2016.31            |
| A_68_P23294136 | chr4:128639545-128639589                          | NM_172875:95       | Adc        | INSIDE                 | 0.626                                                        | 0.376                          | 5729.19            | 2154.71            | 0.236                          | 3816.48            | 898.91             |
| A_68_P32908647 | chr12:89599176-89599220                           | NM_028105:-46      | Adck1      | PROMOTER               | 0.575                                                        | 0.437                          | 1063.88            | 464.87             | 0.251                          | 875.74             | 219.89             |
| A_68_P24383760 | chr6:39523904-39523948                            | NM_178873:52       | Adck2      | INSIDE                 | 0.623                                                        | 0.439                          | 3958.96            | 1738.61            | 0.274                          | 2789.82            | 763.42             |
| A_68_P27571288 | chr11:6963967-6964011                             | NM_009622:497      | Adcy1      | INSIDE                 | 0.594                                                        | 0.566                          | 1156.41            | 654.47             | 0.336                          | 905.95             | 304.74             |
| A_68_P29113350 | chr13:69138021-69138065                           | NM_153534:377      | Adcy2      | INSIDE                 | 0.455                                                        | 4.127                          | 1150.25            | 4747.57            | 1.877                          | 968.59             | 1818.22            |
| A_68_P30668280 | chr16:35156722-35156766                           | NM_001012765:1023  | Adecy5     | INSIDE                 | 0.554                                                        | 0.470                          | 5162.11            | 2426.27            | 0.26                           | 3609.15            | 940.04             |
| A_68_P30668268 | chr16:35154633-35154677                           | NM_001012765:-1067 | Adecy5     | PROMOTER               | 0.15                                                         | 1.630                          | 4004.01            | 6526.88            | 0.245                          | 3028.83            | 740.67             |

| ProbeName      | Target position of probe on CpG island microarray | TargetID           | GeneSymbol | CpG island Description | Ratio of relative methylation (TiO <sub>2</sub> -NP/Vehicle) | Sham group                     |                    |                    | TiO <sub>2</sub> -H group      |                    |                    |
|----------------|---------------------------------------------------|--------------------|------------|------------------------|--------------------------------------------------------------|--------------------------------|--------------------|--------------------|--------------------------------|--------------------|--------------------|
|                |                                                   |                    |            |                        |                                                              | Relative methylation (Cy5/Cy3) | Cy3 signal (Input) | Cy5 signal (MeDIP) | Relative methylation (Cy5/Cy3) | Cy3 signal (Input) | Cy5 signal (MeDIP) |
| A_68_P26039918 | chr8:90796247-90796291                            | NM_007406:-33      | Adey7      | PROMOTER               | 0.405                                                        | 0.542                          | 987.26             | 534.79             | 0.219                          | 811.74             | 177.99             |
| A_68_P30284265 | chr15:64753968-64754012                           | NM_009623:-132     | Adey8      | PROMOTER               | 0.211                                                        | 2.071                          | 3113.40            | 6448.39            | 0.437                          | 2387.42            | 1042.73            |
| A_68_P30284258 | chr15:64753242-64753286                           | NM_009623:594      | Adey8      | INSIDE                 | 0.501                                                        | 5.250                          | 6000.50            | 31504.10           | 2.632                          | 5039.46            | 13264.80           |
| A_68_P24469549 | chr6:55401776-55401820                            | NM_001025372:-175  | Adeyap1r1  | PROMOTER               | 0.662                                                        | 0.325                          | 2915.63            | 947.62             | 0.215                          | 2084.09            | 448.69             |
| A_68_P23595356 | chr5:34959356-34959400                            | NM_001024458:43016 | Add1       | INSIDE                 | 0.558                                                        | 3.890                          | 854.74             | 3325.03            | 2.171                          | 598.94             | 1300.08            |
| A_68_P32180644 | chr19:53216958-53217002                           | NM_001164100:-265  | Add3       | PROMOTER               | 0.208                                                        | 0.280                          | 4378.53            | 1224.78            | 0.058                          | 3433.25            | 199.48             |
| A_68_P32180643 | chr19:53216882-53216926                           | NM_001164100:-341  | Add3       | PROMOTER               | 0.381                                                        | 4.104                          | 2634.98            | 10814.70           | 1.565                          | 2053.26            | 3213.74            |
| A_68_P22568795 | chr3:138105955-138105999                          | NM_007410:-151     | Adh5       | PROMOTER               | 0.124                                                        | 18.382                         | 6661.84            | 122461.20          | 2.278                          | 5367.24            | 12224.98           |
| A_68_P20633265 | chr1:136312273-136312317                          | NM_028320:251      | Adipor1    | INSIDE                 | 0.177                                                        | 18.680                         | 8278.87            | 154652.20          | 3.31                           | 8788.31            | 29085.42           |
| A_68_P29450644 | chr14:21895153-21895197                           | NM_134079:23320    | Adk        | INSIDE                 | 0.595                                                        | 3.266                          | 962.52             | 3143.30            | 1.945                          | 812.35             | 1579.77            |
| A_68_P21840064 | chr2:168031776-168031820                          | NM_009628:764      | Adnp       | INSIDE                 | 0.117                                                        | 2.265                          | 2778.73            | 6293.87            | 0.265                          | 2087.10            | 552.26             |
| A_68_P21840070 | chr2:168032547-168032591                          | NM_009628:-6       | Adnp       | PROMOTER               | 0.407                                                        | 0.416                          | 2908.49            | 1211.20            | 0.17                           | 2012.61            | 341.51             |
| A_68_P21840065 | chr2:168031845-168031889                          | NM_009628:696      | Adnp       | INSIDE                 | 0.298                                                        | 2.050                          | 7331.33            | 15031.54           | 0.611                          | 5099.65            | 3114.31            |
| A_68_P21840072 | chr2:168032731-168032775                          | NM_009628:-190     | Adnp       | PROMOTER               | 0.402                                                        | 3.913                          | 1113.40            | 4357.14            | 1.572                          | 1073.53            | 1687.07            |
| A_68_P27212538 | chr10:67011354-67011398                           | NM_001005419:327   | Ado        | INSIDE                 | 0.441                                                        | 4.398                          | 637.21             | 2802.12            | 1.939                          | 575.89             | 1116.65            |
| A_68_P27255927 | chr10:74779785-74779829                           | NM_009630:119      | Adora2a    | INSIDE                 | 0.402                                                        | 0.384                          | 1360.33            | 522.20             | 0.154                          | 1125.47            | 173.69             |
| A_68_P27255925 | chr10:74779618-74779662                           | NM_009630:-47      | Adora2a    | PROMOTER               | 0.569                                                        | 2.796                          | 3913.36            | 10940.49           | 1.59                           | 2968.45            | 4718.42            |
| A_68_P27852919 | chr11:62062182-62062226                           | NM_007413:-281     | Adora2b    | PROMOTER               | 0.333                                                        | 0.560                          | 3136.13            | 1757.05            | 0.186                          | 2232.38            | 416.28             |
| A_68_P26552557 | chr9:59139795-59139840                            | NM_028121:439      | Adpgk      | INSIDE                 | 0.533                                                        | 0.190                          | 2513.23            | 477.82             | 0.101                          | 1691.91            | 171.47             |
| A_68_P26552554 | chr9:59139473-59139517                            | NM_028121:116      | Adpgk      | INSIDE                 | 0.611                                                        | 5.599                          | 747.88             | 4187.50            | 3.42                           | 740.79             | 2533.36            |
| A_68_P23279474 | chr4:125998794-125998839                          | NM_133883:131      | Adprhl2    | INSIDE                 | 0.66                                                         | 2.803                          | 2017.79            | 5656.75            | 1.849                          | 1709.35            | 3161.38            |
| A_68_P21635706 | chr2:131388108-131388153                          | NM_013460:-109     | Adra1d     | PROMOTER               | 0.577                                                        | 2.799                          | 2555.98            | 7153.22            | 1.614                          | 1903.09            | 3070.85            |
| A_68_P32186064 | chr19:54121845-54121889                           | NM_007417:2195     | Adra2a     | INSIDE                 | 0.487                                                        | 0.209                          | 4415.58            | 923.13             | 0.102                          | 3277.97            | 333.67             |
| A_68_P32186055 | chr19:54120591-54120635                           | NM_007417:941      | Adra2a     | INSIDE                 | 0.66                                                         | 6.025                          | 774.71             | 4667.32            | 3.979                          | 627.54             | 2497.07            |
| A_68_P21612946 | chr2:127188781-127188825                          | NM_009633:-219     | Adra2b     | PROMOTER               | 0.577                                                        | 0.172                          | 5221.88            | 899.26             | 0.099                          | 3532.07            | 350.70             |
| A_68_P23599469 | chr5:35623311-35623355                            | NM_007418:2118     | Adra2c     | INSIDE                 | 0.353                                                        | 13.946                         | 1724.04            | 24043.59           | 4.921                          | 1447.02            | 7121.31            |
| A_68_P23599458 | chr5:35621995-35622039                            | NM_007418:802      | Adra2c     | INSIDE                 | 0.435                                                        | 4.725                          | 1504.33            | 7108.54            | 2.057                          | 1071.46            | 2203.56            |
| A_68_P32202573 | chr19:56796579-56796623                           | NM_007419:-261     | Adrb1      | PROMOTER               | 0.386                                                        | 7.931                          | 1636.50            | 12978.71           | 3.059                          | 1358.98            | 4157.62            |
| A_68_P32202581 | chr19:56797413-56797457                           | NM_007419:573      | Adrb1      | INSIDE                 | 0.38                                                         | 0.691                          | 1658.52            | 1146.41            | 0.263                          | 1354.17            | 356.00             |
| A_68_P31762242 | chr18:62339733-62339777                           | NM_007420:-141     | Adrb2      | PROMOTER               | 0.281                                                        | 9.344                          | 1573.70            | 14704.59           | 2.627                          | 1330.02            | 3493.32            |
| A_68_P31922428 | chr19:4305887-4305931                             | NM_130863:47       | Adrbk1     | INSIDE                 | 0.616                                                        | 0.555                          | 1795.46            | 996.54             | 0.342                          | 1528.37            | 522.83             |
| A_68_P21901912 | chr2:179906060-179906104                          | NM_019822:-210     | Adrm1      | PROMOTER               | 0.345                                                        | 8.076                          | 871.81             | 7040.49            | 2.783                          | 774.35             | 2155.32            |
| A_68_P30375392 | chr15:80778891-80778935                           | NM_009634:-36      | Adsl       | PROMOTER               | 0.329                                                        | 17.074                         | 6326.97            | 108028.30          | 5.61                           | 5070.53            | 28444.53           |
| A_68_P20861819 | chr1:179726176-179726220                          | NM_007422:442      | Adss       | INSIDE                 | 0.559                                                        | 0.442                          | 1231.19            | 544.04             | 0.247                          | 987.61             | 244.16             |
| A_68_P28751331 | chr12:113858627-113858671                         | NM_007421:391      | Adssl1     | INSIDE                 | 0.498                                                        | 0.459                          | 1642.03            | 754.24             | 0.229                          | 1114.86            | 255.14             |
| A_68_P27565299 | chr11:5761759-5761803                             | NM_009636:-88      | Aebp1      | PROMOTER               | 0.396                                                        | 0.300                          | 2742.76            | 822.35             | 0.119                          | 1956.30            | 232.46             |
| A_68_P27565303 | chr11:5762324-5762369                             | NM_009636:478      | Aebp1      | INSIDE                 | 0.48                                                         | 5.407                          | 3426.62            | 18527.77           | 2.594                          | 2626.17            | 6813.53            |
| A_68_P23603794 | chr5:36236225-36236269                            | NM_027373:279      | Afap1      | INSIDE                 | 0.394                                                        | 0.582                          | 914.94             | 532.80             | 0.229                          | 730.95             | 167.53             |
| A_68_P31759814 | chr18:61946393-61946437                           | NM_178928:-98      | Afap1l1    | PROMOTER               | 0.386                                                        | 4.913                          | 3825.09            | 18791.97           | 1.898                          | 3170.46            | 6017.90            |
| A_68_P31759815 | chr18:61946490-61946534                           | NM_178928:-196     | Afap1l1    | PROMOTER               | 0.527                                                        | 3.042                          | 1624.06            | 4940.21            | 1.604                          | 1325.09            | 2125.47            |
| A_68_P32204531 | chr19:57082851-57082895                           | NM_001177796:193   | Afap1l2    | INSIDE                 | 0.172                                                        | 1.731                          | 4360.31            | 7547.33            | 0.297                          | 3231.27            | 960.11             |
| A_68_P31791928 | chr18:67609055-67609099                           | NM_027130:-286     | Afg3l2     | PROMOTER               | 0.253                                                        | 10.541                         | 9199.88            | 96978.65           | 2.67                           | 6801.77            | 18158.55           |
| A_68_P27633200 | chr11:20641586-20641630                           | NM_181411:-121     | Aftph      | PROMOTER               | 0.442                                                        | 0.245                          | 4346.45            | 1064.38            | 0.108                          | 2912.09            | 315.53             |
| A_68_P20429509 | chr1:91351220-91351264                            | NM_001037136:-143  | Agap1      | PROMOTER               | 0.364                                                        | 4.794                          | 1434.04            | 6875.45            | 1.747                          | 1259.77            | 2200.26            |
| A_68_P27533997 | chr10:126528077-126528121                         | NM_001033263:12136 | Agap2      | INSIDE                 | 0.587                                                        | 0.571                          | 1456.44            | 832.20             | 0.335                          | 1021.96            | 342.66             |
| A_68_P27534006 | chr10:126529092-126529136                         | NM_001033263:13152 | Agap2      | INSIDE                 | 0.197                                                        | 1.525                          | 833.70             | 1271.60            | 0.301                          | 561.06             | 168.99             |

| ProbeName      | Target position of probe on CpG island microarray | TargetID          | GeneSymbol | CpG island Description | Ratio of relative methylation (TiO <sub>2</sub> -NP/Vehicle) | Sham group                     |                    |                    | TiO <sub>2</sub> -H group      |                    |                    |
|----------------|---------------------------------------------------|-------------------|------------|------------------------|--------------------------------------------------------------|--------------------------------|--------------------|--------------------|--------------------------------|--------------------|--------------------|
|                |                                                   |                   |            |                        |                                                              | Relative methylation (Cy5/Cy3) | Cy3 signal (Input) | Cy5 signal (MeDIP) | Relative methylation (Cy5/Cy3) | Cy3 signal (Input) | Cy5 signal (MeDIP) |
| A_68_P23542143 | chr5:23988482-23988526                            | NM_139153:30510   | Agap3      | INSIDE                 | 0.231                                                        | 17.857                         | 3854.65            | 68832.78           | 4.133                          | 3345.90            | 13829.42           |
| A_68_P23542072 | chr5:23980190-23980234                            | NM_139153:22218   | Agap3      | INSIDE                 | 0.561                                                        | 3.638                          | 1103.41            | 4014.60            | 2.043                          | 906.41             | 1851.63            |
| A_68_P24357881 | chr6:34730747-34730791                            | NM_178630:337     | Agbl3      | INSIDE                 | 0.441                                                        | 9.555                          | 347.60             | 3321.20            | 4.213                          | 400.07             | 1685.67            |
| A_68_P23205991 | chr4:110070245-110070289                          | NM_001048189:-129 | Agbl4      | PROMOTER               | 0.581                                                        | 14.500                         | 812.56             | 11781.79           | 8.419                          | 1177.05            | 9909.44            |
| A_68_P20395062 | chr1:82836520-82836565                            | NM_010472:485     | Agfg1      | INSIDE                 | 0.381                                                        | 0.319                          | 2806.03            | 895.69             | 0.122                          | 2271.58            | 276.43             |
| A_68_P20395065 | chr1:82836823-82836867                            | NM_010472:787     | Agfg1      | INSIDE                 | 0.528                                                        | 0.456                          | 1874.53            | 855.58             | 0.241                          | 1469.28            | 354.33             |
| A_68_P24127046 | chr5:138125901-138125945                          | NM_145566:-1      | Agfg2      | PROMOTER               | 0.409                                                        | 4.407                          | 14972.92           | 65986.66           | 1.802                          | 11088.13           | 19986.01           |
| A_68_P24127049 | chr5:138126171-138126224                          | NM_145566:-276    | Agfg2      | PROMOTER               | 0.478                                                        | 0.240                          | 2250.02            | 539.54             | 0.115                          | 1493.83            | 171.13             |
| A_68_P24127045 | chr5:138125808-138125852                          | NM_178162:15      | Agfg2      | INSIDE                 | 0.631                                                        | 0.328                          | 2796.35            | 916.82             | 0.207                          | 2228.88            | 461.18             |
| A_68_P29240371 | chr13:96145165-96145209                           | NM_025630:103     | Aggf1      | INSIDE                 | 0.642                                                        | 3.406                          | 925.52             | 3152.22            | 2.185                          | 817.33             | 1786.19            |
| A_68_P29240369 | chr13:96144912-96144956                           | NM_025630:355     | Aggf1      | INSIDE                 | 0.625                                                        | 3.705                          | 432.35             | 1601.90            | 2.315                          | 417.35             | 966.30             |
| A_68_P22451307 | chr3:116511212-116511256                          | NM_001081326:-150 | Ag1        | PROMOTER               | 0.323                                                        | 0.504                          | 1324.35            | 667.65             | 0.163                          | 1049.07            | 170.91             |
| A_68_P21079933 | chr2:26459306-26459350                            | NM_026212:402     | Agpat2     | INSIDE                 | 0.573                                                        | 3.300                          | 837.22             | 2762.62            | 1.889                          | 712.78             | 1346.69            |
| A_68_P25715449 | chr8:24318844-24318888                            | NM_018743:59      | Agpat6     | INSIDE                 | 0.633                                                        | 2.909                          | 887.82             | 2582.30            | 1.841                          | 707.76             | 1303.34            |
| A_68_P21346286 | chr2:75670175-75670220                            | NM_172666:-36     | Agps       | PROMOTER               | 0.245                                                        | 10.174                         | 1704.76            | 17343.50           | 2.496                          | 1384.23            | 3455.41            |
| A_68_P27794729 | chr11:51398504-51398548                           | NM_028398:268     | Agxt2l2    | INSIDE                 | 0.203                                                        | 1.580                          | 705.49             | 1114.52            | 0.32                           | 684.25             | 219.00             |
| A_68_P20872222 | chr1:181733328-181733372                          | NM_026375:796     | Ahctf1     | INSIDE                 | 0.632                                                        | 5.733                          | 555.31             | 3183.70            | 3.623                          | 420.15             | 1522.21            |
| A_68_P20872224 | chr1:181733633-181733677                          | NM_026375:492     | Ahctf1     | INSIDE                 | 0.64                                                         | 3.354                          | 1185.52            | 3975.65            | 2.147                          | 966.20             | 2074.22            |
| A_68_P23315176 | chr4:132567687-132567731                          | NM_146155:288     | Ahdc1      | INSIDE                 | 0.128                                                        | 2.337                          | 1512.84            | 3536.25            | 0.298                          | 1143.12            | 340.87             |
| A_68_P23315178 | chr4:132568014-132568058                          | NM_146155:616     | Ahdc1      | INSIDE                 | 0.319                                                        | 0.428                          | 2394.18            | 1024.70            | 0.137                          | 1897.86            | 259.08             |
| A_68_P23315382 | chr4:132595283-132595327                          | NM_146155:27884   | Ahdc1      | INSIDE                 | 0.406                                                        | 7.477                          | 1041.67            | 7788.72            | 3.032                          | 898.00             | 2722.80            |
| A_68_P23315555 | chr4:132617504-132617548                          | NM_146155:50106   | Ahdc1      | INSIDE                 | 0.548                                                        | 3.660                          | 1984.52            | 7262.82            | 2.004                          | 1483.94            | 2974.26            |
| A_68_P23315558 | chr4:132617847-132617891                          | NM_146155:50448   | Ahdc1      | INSIDE                 | 0.644                                                        | 3.951                          | 2820.22            | 11143.16           | 2.544                          | 2120.44            | 5394.30            |
| A_68_P23315180 | chr4:132568310-132568354                          | NM_146155:912     | Ahdc1      | INSIDE                 | 0.432                                                        | 4.599                          | 662.25             | 3045.53            | 1.985                          | 619.63             | 1230.04            |
| A_68_P23315717 | chr4:132641057-132641101                          | NM_146155:73658   | Ahdc1      | DOWNSTREAM             | 0.664                                                        | 0.640                          | 1064.65            | 681.44             | 0.425                          | 853.62             | 362.86             |
| A_68_P26989977 | chr10:20672484-20672528                           | NM_026203:154     | Ahi1       | INSIDE                 | 0.318                                                        | 8.161                          | 893.93             | 7295.25            | 2.594                          | 869.69             | 2256.15            |
| A_68_P27646190 | chr11:23397665-23397709                           | NM_172391:260     | Ahsa2      | INSIDE                 | 0.528                                                        | 3.201                          | 1897.51            | 6074.74            | 1.689                          | 1619.50            | 2735.29            |
| A_68_P26530601 | chr9:55174289-55174334                            | NM_172923:-444    | Al118078   | PROMOTER               | 0.666                                                        | 7.559                          | 2176.87            | 16454.92           | 5.038                          | 1643.95            | 8281.97            |
| A_68_P22953596 | chr4:58924953-58924997                            | NM_172381:623     | Al314180   | INSIDE                 | 0.636                                                        | 5.438                          | 341.12             | 1854.99            | 3.459                          | 297.98             | 1030.58            |
| A_68_P22953595 | chr4:58924697-58924741                            | NM_172381:879     | Al314180   | INSIDE                 | 0.373                                                        | 4.220                          | 2339.81            | 9873.62            | 1.572                          | 1866.83            | 2934.83            |
| A_68_P21492618 | chr2:104966489-104966533                          | NR_015462:157     | Al314831   | INSIDE                 | 0.439                                                        | 0.450                          | 1147.14            | 515.95             | 0.198                          | 869.92             | 171.84             |
| A_68_P21492619 | chr2:104966561-104966605                          | NR_015462:85      | Al314831   | INSIDE                 | 0.559                                                        | 3.529                          | 1031.03            | 3638.47            | 1.974                          | 861.06             | 1699.77            |
| A_68_P22862460 | chr4:41445205-41445249                            | NM_001085515:4883 | Al464131   | INSIDE                 | 0.534                                                        | 0.426                          | 1690.58            | 720.29             | 0.227                          | 1197.03            | 272.14             |
| A_68_P22862465 | chr4:41445862-41445906                            | NM_001085515:4225 | Al464131   | INSIDE                 | 0.612                                                        | 0.356                          | 1501.91            | 535.18             | 0.218                          | 1166.99            | 254.31             |
| A_68_P22862454 | chr4:41444579-41444623                            | NM_001085515:5509 | Al464131   | INSIDE                 | 0.629                                                        | 0.367                          | 2117.56            | 777.60             | 0.231                          | 1329.78            | 307.29             |
| A_68_P22862455 | chr4:41444682-41444726                            | NM_001085515:5405 | Al464131   | INSIDE                 | 0.629                                                        | 0.592                          | 2004.10            | 1187.10            | 0.373                          | 1350.49            | 503.14             |
| A_68_P27306491 | chr10:84565795-84565839                           | NM_001013028:445  | Al597468   | INSIDE                 | 0.659                                                        | 0.481                          | 3449.59            | 1659.67            | 0.317                          | 2614.76            | 829.48             |
| A_68_P31212432 | chr17:47605282-47605326                           | NM_145489:31717   | Al661453   | INSIDE                 | 0.386                                                        | 6.462                          | 613.83             | 3966.81            | 2.497                          | 558.32             | 1393.98            |
| A_68_P30473516 | chr15:97998981-97999025                           | NM_177716:766     | Al836003   | INSIDE                 | 0.509                                                        | 0.226                          | 2097.25            | 474.16             | 0.115                          | 1490.73            | 171.41             |
| A_68_P31939554 | chr19:7456968-7457012                             | NM_001033139:526  | Al846148   | INSIDE                 | 0.649                                                        | 0.587                          | 1549.94            | 909.27             | 0.381                          | 1349.38            | 513.78             |
| A_68_P31939551 | chr19:7456653-7456699                             | NM_001033139:840  | Al846148   | INSIDE                 | 0.572                                                        | 3.475                          | 412.55             | 1433.42            | 1.988                          | 399.06             | 793.16             |
| A_68_P27181919 | chr10:61177928-61177972                           | NM_001039194:-60  | Aifm2      | PROMOTER               | 0.448                                                        | 3.083                          | 3557.58            | 10966.50           | 1.38                           | 2623.84            | 3620.14            |
| A_68_P27103326 | chr10:43724148-43724192                           | NM_172393:482     | Aim1       | INSIDE                 | 0.649                                                        | 3.865                          | 1253.73            | 4845.24            | 2.508                          | 1106.45            | 2774.68            |
| A_68_P24158560 | chr5:144670456-144670500                          | NM_001172146:230  | Aimp2      | INSIDE                 | 0.241                                                        | 16.729                         | 2475.08            | 41404.63           | 4.027                          | 2227.97            | 8972.03            |
| A_68_P24158559 | chr5:144670369-144670413                          | NM_001172146:318  | Aimp2      | INSIDE                 | 0.41                                                         | 13.179                         | 2576.58            | 33957.90           | 5.4                            | 2109.74            | 11392.33           |
| A_68_P24158558 | chr5:144670295-144670339                          | NM_001172146:392  | Aimp2      | INSIDE                 | 0.592                                                        | 0.707                          | 1108.51            | 783.31             | 0.418                          | 876.79             | 366.51             |

| ProbeName      | Target position of probe on CpG island microarray | TargetID          | GeneSymbol | CpG island Description | Ratio of relative methylation (TiO <sub>2</sub> -NP/Vehicle) | Sham group                     |                    |                    | TiO <sub>2</sub> -H group      |                    |                    |
|----------------|---------------------------------------------------|-------------------|------------|------------------------|--------------------------------------------------------------|--------------------------------|--------------------|--------------------|--------------------------------|--------------------|--------------------|
|                |                                                   |                   |            |                        |                                                              | Relative methylation (Cy5/Cy3) | Cy3 signal (Input) | Cy5 signal (MeDIP) | Relative methylation (Cy5/Cy3) | Cy3 signal (Input) | Cy5 signal (MeDIP) |
| A_68_P31053607 | chr17:12934828-12934873                           | NR_002853:674     | Aim        | INSIDE                 | 0.631                                                        | 3.759                          | 729.06             | 2740.79            | 2.371                          | 662.15             | 1570.01            |
| A_68_P23425243 | chr4:152857051-152857095                          | NM_001099299:-133 | Ajap1      | PROMOTER               | 0.526                                                        | 8.047                          | 1672.70            | 13460.14           | 4.232                          | 1568.13            | 6636.89            |
| A_68_P23425234 | chr4:152855762-152855806                          | NM_001099299:1155 | Ajap1      | INSIDE                 | 0.6                                                          | 0.523                          | 1111.70            | 581.90             | 0.314                          | 865.54             | 271.71             |
| A_68_P28693523 | chr12:103995794-103995838                         | NM_001142939:204  | AK010878   | INSIDE                 | 0.539                                                        | 0.269                          | 1781.38            | 479.76             | 0.145                          | 1307.32            | 189.77             |
| A_68_P32050810 | chr19:29122317-29122361                           | NM_021299:54      | Ak3        | INSIDE                 | 0.636                                                        | 9.563                          | 949.84             | 9083.06            | 6.08                           | 738.57             | 4490.29            |
| A_68_P23154895 | chr4:101091776-101091820                          | NM_001177602:-95  | Ak4        | PROMOTER               | 0.338                                                        | 9.151                          | 2534.74            | 23196.19           | 3.096                          | 2179.45            | 6748.15            |
| A_68_P23154903 | chr4:101092599-101092643                          | NM_009647:313     | Ak4        | INSIDE                 | 0.579                                                        | 4.437                          | 4087.61            | 18136.01           | 2.568                          | 3324.19            | 8537.25            |
| A_68_P23154908 | chr4:101093069-101093113                          | NM_009647:783     | Ak4        | INSIDE                 | 0.662                                                        | 3.225                          | 429.59             | 1385.55            | 2.136                          | 363.36             | 776.07             |
| A_68_P28002763 | chr11:88726023-88726068                           | NM_001042541:-145 | Akap1      | PROMOTER               | 0.326                                                        | 9.530                          | 927.10             | 8834.94            | 3.102                          | 822.18             | 2550.41            |
| A_68_P28002760 | chr11:88725701-88725745                           | NM_001042541:178  | Akap1      | INSIDE                 | 0.476                                                        | 0.562                          | 2239.63            | 1257.86            | 0.268                          | 1713.93            | 458.48             |
| A_68_P28002759 | chr11:88725539-88725583                           | NM_001042541:340  | Akap1      | INSIDE                 | 0.605                                                        | 2.694                          | 1519.14            | 4092.55            | 1.629                          | 1217.78            | 1983.87            |
| A_68_P28002758 | chr11:88725386-88725430                           | NM_001042541:492  | Akap1      | INSIDE                 | 0.221                                                        | 2.656                          | 1798.65            | 4776.50            | 0.587                          | 1278.28            | 750.17             |
| A_68_P27851243 | chr11:61743609-61743653                           | NM_019921:98      | Akap10     | INSIDE                 | 0.53                                                         | 0.219                          | 2478.14            | 542.08             | 0.116                          | 1962.95            | 227.73             |
| A_68_P27851242 | chr11:61743468-61743512                           | NM_019921:238     | Akap10     | INSIDE                 | 0.646                                                        | 0.659                          | 3257.15            | 2146.56            | 0.426                          | 2388.34            | 1017.04            |
| A_68_P28553305 | chr12:77425730-77425774                           | NM_001101471:-125 | Akap5      | PROMOTER               | 0.418                                                        | 9.637                          | 2243.25            | 21617.91           | 4.027                          | 2475.28            | 9969.16            |
| A_68_P31144954 | chr17:32457616-32457660                           | NM_019774:460     | Akap8      | INSIDE                 | 0.16                                                         | 33.091                         | 4510.07            | 149242.40          | 5.295                          | 4133.55            | 21888.51           |
| A_68_P31144961 | chr17:32458430-32458474                           | NM_017476:29070   | Akap8l     | INSIDE                 | 0.379                                                        | 15.428                         | 2342.26            | 36136.55           | 5.852                          | 2149.04            | 12576.91           |
| A_68_P22831249 | chr4:34498566-34498610                            | NM_001007589:725  | Akirin2    | INSIDE                 | 0.533                                                        | 0.505                          | 3053.83            | 1542.57            | 0.269                          | 2128.59            | 572.65             |
| A_68_P28751739 | chr12:113912106-113912150                         | NM_001165894:359  | Akt1       | INSIDE                 | 0.514                                                        | 3.286                          | 1136.88            | 3736.32            | 1.691                          | 1012.74            | 1712.10            |
| A_68_P25089687 | chr7:52107857-52107901                            | NM_026270:3282    | Akt1s1     | INSIDE                 | 0.325                                                        | 5.753                          | 1037.38            | 5967.54            | 1.872                          | 680.43             | 1273.45            |
| A_68_P20858583 | chr1:179188004-179188048                          | NM_011785:-9128   | Akt3       | PROMOTER               | 0.577                                                        | 0.457                          | 1668.82            | 763.32             | 0.264                          | 1401.87            | 370.09             |
| A_68_P20858581 | chr1:179187745-179187790                          | NM_011785:-8869   | Akt3       | PROMOTER               | 0.348                                                        | 1.484                          | 17417.69           | 25843.65           | 0.516                          | 12721.66           | 6566.07            |
| A_68_P26057102 | chr8:93657583-93657627                            | NM_010241:1791    | Aktip      | INSIDE                 | 0.3                                                          | 8.983                          | 3488.44            | 31335.63           | 2.694                          | 3338.38            | 8993.09            |
| A_68_P26057105 | chr8:93657970-93658014                            | NM_010241:1403    | Aktip      | INSIDE                 | 0.441                                                        | 0.414                          | 1291.05            | 534.42             | 0.182                          | 956.41             | 174.49             |
| A_68_P32109780 | chr19:40662732-40662776                           | NM_019698:199     | Aldh18a1   | INSIDE                 | 0.326                                                        | 2.253                          | 4810.32            | 10835.97           | 0.735                          | 3477.83            | 2554.58            |
| A_68_P24045427 | chr5:122043186-122043230                          | NM_009656:625     | Aldh2      | INSIDE                 | 0.62                                                         | 0.512                          | 1553.34            | 795.36             | 0.317                          | 1207.96            | 383.37             |
| A_68_P27847513 | chr11:61080354-61080398                           | NM_007437:253     | Aldh3a2    | INSIDE                 | 0.497                                                        | 0.585                          | 990.94             | 580.09             | 0.291                          | 898.70             | 261.49             |
| A_68_P28598366 | chr12:85791678-85791722                           | NM_134042:200     | Aldh6a1    | INSIDE                 | 0.361                                                        | 0.318                          | 7211.37            | 2290.21            | 0.115                          | 4775.50            | 546.84             |
| A_68_P31731070 | chr18:56721947-56721991                           | NM_138600:-16     | Aldh7a1    | DIVERGENT_PROMOTER     | 0.128                                                        | 50.011                         | 16103.53           | 805352.20          | 6.406                          | 23189.19           | 148549.30          |
| A_68_P31731124 | chr18:56732842-56732886                           | NM_001127338:-271 | Aldh7a1    | PROMOTER               | 0.129                                                        | 18.996                         | 4428.20            | 84119.02           | 2.449                          | 3800.39            | 9308.30            |
| A_68_P31731123 | chr18:56732742-56732786                           | NM_001127338:-171 | Aldh7a1    | PROMOTER               | 0.529                                                        | 0.387                          | 1195.61            | 462.33             | 0.205                          | 975.29             | 199.51             |
| A_68_P31731071 | chr18:56722024-56722068                           | NM_138600:-94     | Aldh7a1    | DIVERGENT_PROMOTER     | 0.338                                                        | 1.599                          | 2043.83            | 3268.82            | 0.54                           | 1595.37            | 861.79             |
| A_68_P20804630 | chr1:169280208-169280252                          | NM_019993:109     | Aldh9a1    | INSIDE                 | 0.402                                                        | 4.570                          | 2723.83            | 12446.88           | 1.836                          | 2483.38            | 4559.97            |
| A_68_P20804631 | chr1:169280349-169280393                          | NM_019993:249     | Aldh9a1    | INSIDE                 | 0.494                                                        | 0.244                          | 2178.67            | 531.42             | 0.121                          | 1474.27            | 177.69             |
| A_68_P20804634 | chr1:169280619-169280663                          | NM_019993:519     | Aldh9a1    | INSIDE                 | 0.597                                                        | 0.237                          | 4581.98            | 1086.65            | 0.142                          | 2772.98            | 392.61             |
| A_68_P25502305 | chr7:133942445-133942489                          | NM_001177307:226  | Aldoa      | INSIDE                 | 0.526                                                        | 4.909                          | 2379.74            | 11681.34           | 2.584                          | 1772.53            | 4579.36            |
| A_68_P30428912 | chr15:90055009-90055053                           | NM_001033441:289  | Alg10b     | INSIDE                 | 0.64                                                         | 0.505                          | 1377.48            | 695.64             | 0.323                          | 1157.67            | 373.94             |
| A_68_P25708990 | chr8:23170949-23170993                            | NM_183142:-221    | Alg11      | DIVERGENT_PROMOTER     | 0.253                                                        | 6.933                          | 3353.74            | 23253.05           | 1.757                          | 2758.90            | 4848.16            |
| A_68_P32717145 | chrX:140752482-140752526                          | NM_026247:-4      | Alg13      | PROMOTER               | 0.167                                                        | 27.744                         | 2690.32            | 74640.10           | 4.642                          | 2963.41            | 13757.02           |
| A_68_P22149461 | chr3:54539488-54539532                            | NM_025442:50      | Alg5       | INSIDE                 | 0.325                                                        | 1.404                          | 1077.11            | 1512.19            | 0.456                          | 965.54             | 440.13             |
| A_68_P26505580 | chr9:50583427-50583471                            | NM_133981:14      | Alg9       | INSIDE                 | 0.54                                                         | 0.243                          | 2162.23            | 525.59             | 0.131                          | 1515.80            | 198.94             |
| A_68_P31341464 | chr17:72953935-72953979                           | NM_007439:-309    | Alk        | PROMOTER               | 0.297                                                        | 11.661                         | 5888.19            | 68661.52           | 3.46                           | 5298.37            | 18334.04           |
| A_68_P31341454 | chr17:72953064-72953108                           | NM_007439:561     | Alk        | INSIDE                 | 0.608                                                        | 2.644                          | 1253.30            | 3313.74            | 1.609                          | 1077.51            | 1733.27            |
| A_68_P28616635 | chr12:88784339-88784383                           | NM_001102565:429  | Alkbh1     | INSIDE                 | 0.553                                                        | 2.899                          | 3046.36            | 8831.83            | 1.604                          | 2599.55            | 4169.57            |
| A_68_P21438435 | chr2:93851039-93851083                            | NM_026944:-173    | Alkbh3     | PROMOTER               | 0.191                                                        | 14.094                         | 744.20             | 10489.02           | 2.693                          | 594.72             | 1601.76            |
| A_68_P31259475 | chr17:57137107-57137151                           | NM_025538:367     | Alkbh7     | INSIDE                 | 0.471                                                        | 0.591                          | 4201.36            | 2484.09            | 0.279                          | 2775.09            | 772.88             |

| ProbeName      | Target position of probe on CpG island microarray | TargetID          | GeneSymbol | CpG island Description | Ratio of relative methylation (TiO <sub>2</sub> -NP/Vehicle) | Sham group                     |                    |                    | TiO <sub>2</sub> -H group      |                    |                    |
|----------------|---------------------------------------------------|-------------------|------------|------------------------|--------------------------------------------------------------|--------------------------------|--------------------|--------------------|--------------------------------|--------------------|--------------------|
|                |                                                   |                   |            |                        |                                                              | Relative methylation (Cy5/Cy3) | Cy3 signal (Input) | Cy5 signal (MeDIP) | Relative methylation (Cy5/Cy3) | Cy3 signal (Input) | Cy5 signal (MeDIP) |
| A_68_P31259472 | chr17:57136735-57136779                           | NM_025538:-5      | Alkbh7     | PROMOTER               | 0.612                                                        | 2.754                          | 2382.33            | 6561.70            | 1.687                          | 1934.13            | 3262.67            |
| A_68_P31259474 | chr17:57136971-57137015                           | NM_025538:231     | Alkbh7     | INSIDE                 | 0.432                                                        | 3.274                          | 2824.93            | 9249.24            | 1.415                          | 2248.60            | 3181.06            |
| A_68_P27899786 | chr11:70068857-70068903                           | NM_007440:-37     | Alox12     | PROMOTER               | 0.262                                                        | 9.750                          | 962.81             | 9387.80            | 2.557                          | 1000.65            | 2559.08            |
| A_68_P27899783 | chr11:70068622-70068666                           | NM_007440:199     | Alox12     | INSIDE                 | 0.659                                                        | 2.249                          | 2840.87            | 6388.97            | 1.482                          | 1983.29            | 2939.08            |
| A_68_P24776842 | chr6:116410742-116410786                          | NM_009662:432     | Alox5      | INSIDE                 | 0.66                                                         | 0.585                          | 1117.06            | 652.95             | 0.386                          | 947.70             | 365.35             |
| A_68_P24776845 | chr6:116411172-116411216                          | NM_009662:2       | Alox5      | INSIDE                 | 0.27                                                         | 5.832                          | 2100.63            | 12250.35           | 1.575                          | 1794.69            | 2827.18            |
| A_68_P24184312 | chr5:150099157-150099201                          | NM_009663:22545   | Alox5ap    | INSIDE                 | 0.19                                                         | 1.771                          | 2446.85            | 4333.55            | 0.337                          | 1651.93            | 555.89             |
| A_68_P24184313 | chr5:150099222-150099276                          | NM_009663:22615   | Alox5ap    | INSIDE                 | 0.649                                                        | 0.716                          | 1466.32            | 1050.60            | 0.465                          | 1036.03            | 481.88             |
| A_68_P20415724 | chr1:88995295-88995339                            | NM_001081082:2865 | Alpi       | INSIDE                 | 0.626                                                        | 3.404                          | 2123.31            | 7228.56            | 2.13                           | 1761.92            | 3752.38            |
| A_68_P20415723 | chr1:88995177-88995221                            | NM_001081082:2983 | Alpi       | INSIDE                 | 0.48                                                         | 0.627                          | 750.40             | 470.64             | 0.301                          | 623.83             | 187.79             |
| A_68_P23342100 | chr4:137351824-137351868                          | NM_007431:446     | Alpl       | INSIDE                 | 0.551                                                        | 5.793                          | 560.31             | 3245.87            | 3.195                          | 402.12             | 1284.62            |
| A_68_P26826440 | chr9:110782793-110782837                          | NM_001146060:-11  | Als2cl     | PROMOTER               | 0.261                                                        | 10.145                         | 2031.19            | 20605.59           | 2.652                          | 1652.21            | 4381.47            |
| A_68_P22407403 | chr3:107398682-107398726                          | NM_007441:756     | Alx3       | INSIDE                 | 0.563                                                        | 4.349                          | 1582.89            | 6883.70            | 2.448                          | 1229.92            | 3010.22            |
| A_68_P21436146 | chr2:93482709-93482753                            | NM_007442:140     | Alx4       | INSIDE                 | 0.527                                                        | 6.279                          | 1727.44            | 10846.24           | 3.307                          | 1451.58            | 4800.66            |
| A_68_P21436148 | chr2:93483044-93483088                            | NM_007442:476     | Alx4       | INSIDE                 | 0.191                                                        | 3.160                          | 2773.37            | 8764.57            | 0.602                          | 2233.81            | 1345.85            |
| A_68_P21436154 | chr2:93483591-93483635                            | NM_007442:1022    | Alx4       | INSIDE                 | 0.428                                                        | 5.018                          | 509.19             | 2555.21            | 2.148                          | 368.29             | 791.25             |
| A_68_P31095748 | chr17:24300500-24300544                           | NM_172935:178     | Amdhd2     | INSIDE                 | 0.353                                                        | 1.976                          | 3444.48            | 6805.64            | 0.698                          | 2540.90            | 1774.06            |
| A_68_P26074978 | chr8:96536308-96536352                            | NM_011787:210     | Amfr       | INSIDE                 | 0.396                                                        | 6.902                          | 1486.28            | 10257.83           | 2.733                          | 1388.98            | 3795.59            |
| A_68_P32710888 | chrX:139401254-139401298                          | NM_019496:-5      | Ammecr1    | PROMOTER               | 0.48                                                         | 3.579                          | 1260.03            | 4509.09            | 1.717                          | 1481.47            | 2544.29            |
| A_68_P32710881 | chrX:139400366-139400410                          | NM_019496:883     | Ammecr1    | INSIDE                 | 0.118                                                        | 12.746                         | 747.12             | 9522.63            | 1.505                          | 1083.62            | 1630.54            |
| A_68_P31599404 | chr18:31919894-31919938                           | NM_153515:383     | Ammecr11   | INSIDE                 | 0.582                                                        | 0.459                          | 1164.60            | 534.07             | 0.267                          | 927.52             | 247.50             |
| A_68_P28743070 | chr12:112513574-112513618                         | NM_033603:4275    | Amn        | INSIDE                 | 0.48                                                         | 5.831                          | 791.17             | 4613.41            | 2.799                          | 726.04             | 2031.93            |
| A_68_P28743036 | chr12:112509597-112509641                         | NM_033603:297     | Amn        | INSIDE                 | 0.609                                                        | 0.649                          | 2708.39            | 1759.01            | 0.395                          | 1997.25            | 789.89             |
| A_68_P28743035 | chr12:112509516-112509560                         | NM_033603:217     | Amn        | INSIDE                 | 0.284                                                        | 1.392                          | 1777.97            | 2475.61            | 0.396                          | 1214.53            | 480.84             |
| A_68_P28743034 | chr12:112509399-112509443                         | NM_033603:99      | Amn        | INSIDE                 | 0.386                                                        | 0.581                          | 1025.24            | 595.74             | 0.224                          | 771.04             | 172.79             |
| A_68_P26318242 | chr9:14419308-14419352                            | NM_001081395:114  | Amot1l     | INSIDE                 | 0.296                                                        | 0.293                          | 3206.05            | 940.22             | 0.087                          | 2360.33            | 205.16             |
| A_68_P22410430 | chr3:107889618-107889662                          | NM_028779:-95     | Ampd2      | DIVERGENT_PROMOTER     | 0.353                                                        | 5.642                          | 1915.39            | 10806.81           | 1.993                          | 1653.83            | 3296.40            |
| A_68_P22410425 | chr3:107889046-107889090                          | NM_028779:477     | Ampd2      | INSIDE                 | 0.623                                                        | 3.158                          | 3404.72            | 10751.44           | 1.967                          | 2716.32            | 5342.97            |
| A_68_P22410428 | chr3:107889363-107889407                          | NM_028779:161     | Ampd2      | INSIDE                 | 0.529                                                        | 0.609                          | 2365.16            | 1439.26            | 0.322                          | 1781.17            | 572.96             |
| A_68_P25415072 | chr7:117911998-117912042                          | NM_009667:-4097   | Ampd3      | PROMOTER               | 0.653                                                        | 0.226                          | 2025.48            | 458.13             | 0.148                          | 1631.89            | 241.18             |
| A_68_P25415075 | chr7:117912319-117912363                          | NM_009667:-3777   | Ampd3      | PROMOTER               | 0.496                                                        | 4.341                          | 595.86             | 2586.47            | 2.155                          | 487.71             | 1050.89            |
| A_68_P28859761 | chr13:19040366-19040410                           | NM_175007:149     | Amph       | INSIDE                 | 0.403                                                        | 7.133                          | 6594.53            | 47038.03           | 2.877                          | 5148.82            | 14811.18           |
| A_68_P28859763 | chr13:19040669-19040713                           | NM_175007:451     | Amph       | INSIDE                 | 0.178                                                        | 9.814                          | 792.27             | 7775.76            | 1.743                          | 694.48             | 1210.74            |
| A_68_P24143006 | chr5:141211659-141211703                          | NM_173405:11600   | Amz1       | INSIDE                 | 0.069                                                        | 4.332                          | 3795.51            | 16440.53           | 0.299                          | 2959.07            | 884.58             |
| A_68_P28118514 | chr11:109287314-109287358                         | NM_025275:77      | Amz2       | INSIDE                 | 0.33                                                         | 0.499                          | 9379.77            | 4118.39            | 0.145                          | 6727.55            | 975.05             |
| A_68_P21620795 | chr2:128512977-128513021                          | NM_008569:133     | Anapc1     | INSIDE                 | 0.561                                                        | 2.736                          | 1704.37            | 4663.31            | 1.536                          | 1286.46            | 1975.38            |
| A_68_P25996048 | chr8:82235800-82235844                            | NM_026904:104     | Anapc10    | INSIDE                 | 0.313                                                        | 0.261                          | 3883.18            | 1012.28            | 0.082                          | 2672.35            | 218.21             |
| A_68_P28185536 | chr11:120459969-120460013                         | NM_001038230:145  | Anapc11    | INSIDE                 | 0.635                                                        | 0.421                          | 1930.99            | 813.70             | 0.268                          | 1732.35            | 463.83             |
| A_68_P28185535 | chr11:120459852-120459896                         | NM_001038230:29   | Anapc11    | INSIDE                 | 0.664                                                        | 3.541                          | 833.40             | 2951.25            | 2.352                          | 692.77             | 1629.24            |
| A_68_P26781229 | chr9:102528705-102528749                          | NM_181394:101     | Anapc13    | INSIDE                 | 0.447                                                        | 0.601                          | 776.08             | 466.58             | 0.269                          | 644.29             | 173.09             |
| A_68_P21071034 | chr2:25127984-25128028                            | NM_175300:21      | Anapc2     | INSIDE                 | 0.648                                                        | 0.392                          | 1960.60            | 768.65             | 0.254                          | 1469.93            | 373.31             |
| A_68_P31150484 | chr17:33918191-33918235                           | NM_020581:308     | Angptl4    | INSIDE                 | 0.557                                                        | 3.437                          | 597.72             | 2054.26            | 1.914                          | 467.82             | 895.51             |
| A_68_P30092468 | chr15:27396965-27397009                           | NM_020332:555     | Ank        | INSIDE                 | 0.52                                                         | 0.249                          | 1853.11            | 461.19             | 0.129                          | 1327.77            | 171.90             |
| A_68_P27226083 | chr10:69285075-69285119                           | NM_146005:288641  | Ank3       | INSIDE                 | 0.617                                                        | 2.509                          | 2188.21            | 5490.55            | 1.549                          | 1392.63            | 2157.05            |
| A_68_P27912780 | chr11:72503452-72503496                           | NM_009671:-29     | Ankfy1     | PROMOTER               | 0.451                                                        | 0.281                          | 2093.11            | 587.48             | 0.127                          | 1414.56            | 179.25             |
| A_68_P23447093 | chr5:3802955-3802999                              | NM_001003909:133  | Ankib1     | INSIDE                 | 0.243                                                        | 14.546                         | 1978.29            | 28777.24           | 3.534                          | 1959.48            | 6923.90            |



| ProbeName      | Target position of probe on CpG island microarray | TargetID            | GeneSymbol | CpG island Description | Ratio of relative methylation (TiO <sub>2</sub> -NP/Vehicle) | Sham group                     |                    |                    | TiO <sub>2</sub> -H group      |                    |                    |
|----------------|---------------------------------------------------|---------------------|------------|------------------------|--------------------------------------------------------------|--------------------------------|--------------------|--------------------|--------------------------------|--------------------|--------------------|
|                |                                                   |                     |            |                        |                                                              | Relative methylation (Cy5/Cy3) | Cy3 signal (Input) | Cy5 signal (MeDIP) | Relative methylation (Cy5/Cy3) | Cy3 signal (Input) | Cy5 signal (MeDIP) |
| A_68_P23447092 | chr5:3802834-3802878                              | NM_001003909:253    | Ankib1     | INSIDE                 | 0.595                                                        | 5.980                          | 806.78             | 4824.17            | 3.555                          | 728.83             | 2591.04            |
| A_68_P25656692 | chr8:11635953-11635997                            | NM_133971:-220      | Ankrd10    | PROMOTER               | 0.487                                                        | 0.189                          | 2680.78            | 506.55             | 0.092                          | 1928.56            | 177.56             |
| A_68_P25656690 | chr8:11635804-11635848                            | NM_133971:-72       | Ankrd10    | PROMOTER               | 0.499                                                        | 4.199                          | 3007.76            | 12628.89           | 2.095                          | 2611.03            | 5469.54            |
| A_68_P26237605 | chr8:125566196-125566241                          | NM_001081379:-34    | Ankrd11    | PROMOTER               | 0.301                                                        | 8.236                          | 2761.47            | 22742.82           | 2.483                          | 2926.30            | 7264.78            |
| A_68_P26237609 | chr8:125566578-125566622                          | NM_001081379:-416   | Ankrd11    | PROMOTER               | 0.343                                                        | 0.250                          | 2917.26            | 729.24             | 0.086                          | 2178.85            | 187.04             |
| A_68_P27937765 | chr11:77285191-77285236                           | NM_172945:17967     | Ankrd13b   | INSIDE                 | 0.54                                                         | 4.452                          | 1132.99            | 5044.40            | 2.405                          | 918.97             | 2210.53            |
| A_68_P22682770 | chr3:157610734-157610778                          | NM_001013806:327    | Ankrd13c   | INSIDE                 | 0.292                                                        | 29.334                         | 9272.17            | 271985.40          | 8.557                          | 10819.46           | 92585.95           |
| A_68_P22682769 | chr3:157610620-157610664                          | NM_001013806:213    | Ankrd13c   | INSIDE                 | 0.601                                                        | 7.289                          | 3353.47            | 24441.85           | 4.382                          | 2864.27            | 12550.29           |
| A_68_P31922243 | chr19:4282842-4282886                             | NM_026720:273       | Ankrd13d   | INSIDE                 | 0.468                                                        | 0.197                          | 3465.43            | 681.59             | 0.092                          | 2602.73            | 239.50             |
| A_68_P23882636 | chr5:90794437-90794481                            | NM_030886:753       | Ankrd17    | INSIDE                 | 0.078                                                        | 1.663                          | 8321.87            | 13836.28           | 0.13                           | 6303.78            | 820.28             |
| A_68_P23882634 | chr5:90794262-90794306                            | NM_030886:927       | Ankrd17    | INSIDE                 | 0.251                                                        | 0.248                          | 5062.16            | 1253.30            | 0.062                          | 3650.05            | 227.11             |
| A_68_P23882644 | chr5:90795790-90795834                            | NM_030886:-601      | Ankrd17    | PROMOTER               | 0.621                                                        | 2.528                          | 4075.12            | 10301.11           | 1.571                          | 3333.51            | 5236.64            |
| A_68_P24787432 | chr6:118512444-118512488                          | NM_001081112:-192   | Ankrd26    | PROMOTER               | 0.436                                                        | 0.455                          | 2178.03            | 990.26             | 0.198                          | 1462.09            | 289.70             |
| A_68_P29514233 | chr14:32643204-32643248                           | NM_001024604:375    | Ankrd28    | INSIDE                 | 0.341                                                        | 1.559                          | 1207.84            | 1882.51            | 0.532                          | 1054.30            | 560.95             |
| A_68_P25833746 | chr8:47085665-47085709                            | NM_001039562:-482   | Ankrd37    | PROMOTER               | 0.523                                                        | 4.131                          | 3621.58            | 14961.46           | 2.16                           | 2921.32            | 6310.88            |
| A_68_P25833742 | chr8:47085366-47085410                            | NM_001039562:-184   | Ankrd37    | PROMOTER               | 0.56                                                         | 2.767                          | 3010.56            | 8329.94            | 1.55                           | 2432.96            | 3770.03            |
| A_68_P20148961 | chr1:36604157-36604208                            | NM_026241:-136      | Ankrd39    | PROMOTER               | 0.424                                                        | 3.994                          | 1522.13            | 6078.80            | 1.692                          | 1166.14            | 1972.83            |
| A_68_P28032141 | chr11:94189750-94189794                           | NM_146024:458       | Ankrd40    | INSIDE                 | 0.577                                                        | 0.527                          | 1730.07            | 910.89             | 0.304                          | 1519.13            | 461.64             |
| A_68_P27804984 | chr11:53292506-53292550                           | NM_183173:1169      | Ankrd43    | INSIDE                 | 0.56                                                         | 3.698                          | 696.66             | 2576.16            | 2.071                          | 599.26             | 1240.90            |
| A_68_P27804987 | chr11:53292850-53292894                           | NM_183173:825       | Ankrd43    | INSIDE                 | 0.247                                                        | 9.435                          | 259.59             | 2449.22            | 2.333                          | 315.59             | 736.39             |
| A_68_P20239578 | chr1:54983378-54983422                            | NM_001081433:-169   | Ankrd44    | PROMOTER               | 0.075                                                        | 26.870                         | 7262.80            | 195149.40          | 2.014                          | 5175.49            | 10421.22           |
| A_68_P20239573 | chr1:54982711-54982755                            | NM_001081433:499    | Ankrd44    | INSIDE                 | 0.647                                                        | 0.337                          | 2696.88            | 908.84             | 0.218                          | 2052.25            | 447.36             |
| A_68_P20770260 | chr1:163072965-163073010                          | NM_028664:145       | Ankrd45    | INSIDE                 | 0.518                                                        | 0.518                          | 1176.51            | 608.88             | 0.268                          | 954.19             | 255.88             |
| A_68_P20770398 | chr1:163101115-163101159                          | NM_028664:28294     | Ankrd45    | DOWNSTREAM             | 0.622                                                        | 0.353                          | 2426.52            | 855.76             | 0.219                          | 1820.75            | 399.46             |
| A_68_P22069519 | chr3:38383514-38383558                            | NM_001167883:202    | Ankrd50    | INSIDE                 | 0.315                                                        | 9.454                          | 3102.20            | 29328.63           | 2.979                          | 2673.77            | 7964.36            |
| A_68_P22069523 | chr3:38383943-38383987                            | NM_001167883:-226   | Ankrd50    | PROMOTER               | 0.434                                                        | 0.257                          | 11458.35           | 2949.57            | 0.112                          | 7403.55            | 826.18             |
| A_68_P24595345 | chr6:83713011-83713056                            | NM_029245:394       | Ankrd53    | INSIDE                 | 0.379                                                        | 0.578                          | 4212.53            | 2434.64            | 0.219                          | 2907.54            | 637.19             |
| A_68_P23897556 | chr5:93474347-93474391                            | NM_175270:-320      | Ankrd56    | PROMOTER               | 0.538                                                        | 0.634                          | 1761.77            | 1116.76            | 0.341                          | 1435.83            | 489.34             |
| A_68_P23897553 | chr5:93473897-93473941                            | NM_175270:130       | Ankrd56    | INSIDE                 | 0.229                                                        | 7.020                          | 1308.96            | 9189.26            | 1.608                          | 1013.51            | 1629.40            |
| A_68_P32321491 | chrX:34588512-34588556                            | NM_173779:-305      | Ankrd58    | PROMOTER               | 0.357                                                        | 9.297                          | 3834.33            | 35649.51           | 3.317                          | 3929.70            | 13036.38           |
| A_68_P28741420 | chr12:112215750-112215794                         | NM_175207:1459      | Ankrd9     | INSIDE                 | 0.432                                                        | 3.834                          | 1004.36            | 3851.21            | 1.655                          | 813.01             | 1345.59            |
| A_68_P27338390 | chr10:90291759-90291803                           | NM_001177396:252345 | Anks1b     | INSIDE                 | 0.466                                                        | 11.195                         | 1225.75            | 13722.65           | 5.222                          | 1010.62            | 5277.66            |
| A_68_P27338392 | chr10:90291975-90292019                           | NM_001177396:252561 | Anks1b     | INSIDE                 | 0.564                                                        | 11.878                         | 1790.63            | 21269.25           | 6.696                          | 1611.31            | 10789.95           |
| A_68_P27338397 | chr10:90292634-90292678                           | NM_001177396:253221 | Anks1b     | INSIDE                 | 0.587                                                        | 0.698                          | 1771.95            | 1236.02            | 0.409                          | 1443.38            | 590.51             |
| A_68_P27339383 | chr10:90432803-90432847                           | NM_001177396:393389 | Anks1b     | INSIDE                 | 0.56                                                         | 0.601                          | 1114.66            | 669.94             | 0.336                          | 969.85             | 326.14             |
| A_68_P25608860 | chr7:151924429-151924473                          | NM_178642:-67       | Ano1       | PROMOTER               | 0.61                                                         | 4.093                          | 1646.14            | 6736.95            | 2.497                          | 1446.52            | 3611.71            |
| A_68_P25608514 | chr7:151864472-151864516                          | NM_178642:59889     | Ano1       | INSIDE                 | 0.413                                                        | 0.606                          | 1028.28            | 623.03             | 0.25                           | 796.50             | 199.09             |
| A_68_P26888672 | chr9:122203588-122203632                          | NM_133979:-118      | Ano10      | PROMOTER               | 0.477                                                        | 0.484                          | 2900.07            | 1404.27            | 0.231                          | 2291.49            | 529.72             |
| A_68_P26888673 | chr9:122203754-122203798                          | NM_133979:-284      | Ano10      | PROMOTER               | 0.501                                                        | 0.517                          | 4856.92            | 2512.44            | 0.259                          | 3692.67            | 956.14             |
| A_68_P30459959 | chr15:95620940-95620984                           | NM_175344:-311      | Ano6       | PROMOTER               | 0.428                                                        | 7.551                          | 3394.54            | 25633.06           | 3.232                          | 2594.72            | 8387.24            |
| A_68_P30459964 | chr15:95621741-95621785                           | NM_175344:489       | Ano6       | INSIDE                 | 0.598                                                        | 0.646                          | 1491.15            | 962.69             | 0.386                          | 1220.25            | 470.75             |
| A_68_P25957039 | chr8:74005499-74005543                            | NM_001164679:4446   | Ano8       | INSIDE                 | 0.329                                                        | 12.041                         | 669.14             | 8056.97            | 3.96                           | 577.54             | 2286.76            |
| A_68_P25957034 | chr8:74004823-74004867                            | NM_001164679:5122   | Ano8       | INSIDE                 | 0.537                                                        | 9.199                          | 3208.81            | 29518.88           | 4.939                          | 2514.42            | 12419.17           |
| A_68_P26569955 | chr9:62189553-62189597                            | NM_009672:425       | Anp32a     | INSIDE                 | 0.159                                                        | 3.006                          | 7221.72            | 21708.39           | 0.477                          | 5020.82            | 2395.12            |
| A_68_P26569948 | chr9:62188707-62188751                            | NM_009672:-421      | Anp32a     | PROMOTER               | 0.47                                                         | 0.179                          | 3446.02            | 616.76             | 0.084                          | 2345.07            | 197.15             |
| A_68_P26569953 | chr9:62189357-62189414                            | NM_009672:236       | Anp32a     | INSIDE                 | 0.153                                                        | 0.606                          | 2485.64            | 1506.35            | 0.093                          | 1863.51            | 173.19             |

| ProbeName      | Target position of probe on CpG island microarray | TargetID           | GeneSymbol | CpG island Description | Ratio of relative methylation (TiO <sub>2</sub> -NP/Vehicle) | Sham group                     |                    |                    | TiO <sub>2</sub> -H group      |                    |                    |
|----------------|---------------------------------------------------|--------------------|------------|------------------------|--------------------------------------------------------------|--------------------------------|--------------------|--------------------|--------------------------------|--------------------|--------------------|
|                |                                                   |                    |            |                        |                                                              | Relative methylation (Cy5/Cy3) | Cy3 signal (Input) | Cy5 signal (MeDIP) | Relative methylation (Cy5/Cy3) | Cy3 signal (Input) | Cy5 signal (MeDIP) |
| A_68_P22888792 | chr4:46464440-46464484                            | NM_130889:474      | Anp32b     | INSIDE                 | 0.204                                                        | 12.548                         | 3130.00            | 39275.30           | 2.563                          | 3142.32            | 8054.21            |
| A_68_P22346557 | chr3:95755188-95755232                            | NM_023210:22031    | Anp32e     | DOWNSTREAM             | 0.487                                                        | 0.284                          | 2592.05            | 736.71             | 0.138                          | 1978.71            | 273.84             |
| A_68_P22346556 | chr3:95755077-95755121                            | NM_023210:21919    | Anp32e     | DOWNSTREAM             | 0.52                                                         | 0.370                          | 2712.15            | 1003.83            | 0.193                          | 2045.71            | 393.81             |
| A_68_P24615404 | chr6:87285370-87285414                            | NM_054041:377      | Antxr1     | INSIDE                 | 0.579                                                        | 5.369                          | 3989.23            | 21419.00           | 3.108                          | 3454.43            | 10737.19           |
| A_68_P23915350 | chr5:98364657-98364701                            | NM_133738:95303    | Antxr2     | INSIDE                 | 0.423                                                        | 3.587                          | 1101.44            | 3950.96            | 1.516                          | 1160.48            | 1758.78            |
| A_68_P29480016 | chr14:26661518-26661562                           | NM_013469:-100     | Anxa11     | PROMOTER               | 0.595                                                        | 0.624                          | 982.86             | 613.02             | 0.371                          | 866.31             | 321.75             |
| A_68_P22058283 | chr3:36374398-36374443                            | NM_009673:389      | Anxa5      | INSIDE                 | 0.56                                                         | 0.576                          | 948.41             | 545.81             | 0.322                          | 855.72             | 275.83             |
| A_68_P27560709 | chr11:4887252-4887296                             | NM_007454:367      | Ap1b1      | INSIDE                 | 0.477                                                        | 0.178                          | 2572.37            | 457.51             | 0.085                          | 2030.16            | 172.30             |
| A_68_P27560706 | chr11:4886974-4887018                             | NM_007454:89       | Ap1b1      | INSIDE                 | 0.521                                                        | 11.716                         | 2548.40            | 29856.55           | 6.105                          | 2027.28            | 12375.98           |
| A_68_P27560710 | chr11:4887330-4887374                             | NM_007454:445      | Ap1b1      | INSIDE                 | 0.616                                                        | 0.286                          | 2164.43            | 618.98             | 0.176                          | 1565.66            | 275.75             |
| A_68_P26158882 | chr8:112302510-112302554                          | NM_009677:-7       | Ap1g1      | PROMOTER               | 0.536                                                        | 3.337                          | 1295.51            | 4322.79            | 1.79                           | 1059.87            | 1896.94            |
| A_68_P25960292 | chr8:74764393-74764437                            | NM_007456:384      | Ap1m1      | INSIDE                 | 0.596                                                        | 5.518                          | 744.87             | 4110.48            | 3.288                          | 621.84             | 2044.60            |
| A_68_P25960290 | chr8:74764202-74764246                            | NM_007456:194      | Ap1m1      | INSIDE                 | 0.548                                                        | 2.760                          | 1126.60            | 3108.98            | 1.512                          | 956.04             | 1445.47            |
| A_68_P25090215 | chr7:52185401-52185445                            | NM_001077264:-562  | Ap2a1      | PROMOTER               | 0.65                                                         | 0.655                          | 1801.44            | 1179.71            | 0.426                          | 1462.38            | 622.33             |
| A_68_P25589623 | chr7:148748286-148748330                          | NM_007459:230      | Ap2a2      | INSIDE                 | 0.331                                                        | 0.369                          | 1849.75            | 683.39             | 0.122                          | 1462.27            | 178.59             |
| A_68_P30588065 | chr16:20535666-20535710                           | NM_009679:112      | Ap2m1      | INSIDE                 | 0.497                                                        | 7.429                          | 1915.42            | 14230.14           | 3.693                          | 1801.45            | 6652.06            |
| A_68_P29234322 | chr13:95129157-95129201                           | NM_009680:264      | Ap3b1      | INSIDE                 | 0.281                                                        | 0.394                          | 2191.36            | 863.73             | 0.111                          | 1573.17            | 174.34             |
| A_68_P25712956 | chr8:23916111-23916155                            | NM_001122820:-6    | Ap3m2      | PROMOTER               | 0.188                                                        | 14.788                         | 3058.38            | 45228.25           | 2.782                          | 2971.41            | 8267.79            |
| A_68_P31678555 | chr18:46901926-46901970                           | NM_009681:378      | Ap3s1      | INSIDE                 | 0.276                                                        | 16.876                         | 2201.88            | 37158.21           | 4.656                          | 3362.24            | 15655.08           |
| A_68_P22388171 | chr3:103613470-103613514                          | NM_001163552:53    | Ap4b1      | INSIDE                 | 0.629                                                        | 5.571                          | 844.22             | 4702.74            | 3.505                          | 759.62             | 2662.26            |
| A_68_P27339936 | chr10:90545573-90545617                           | NM_001042558:-106  | Apaf1      | DIVERGENT_PROMOTER     | 0.568                                                        | 4.326                          | 843.78             | 3650.22            | 2.459                          | 739.14             | 1817.59            |
| A_68_P27339932 | chr10:90545143-90545187                           | NM_001042558:324   | Apaf1      | INSIDE                 | 0.634                                                        | 2.751                          | 784.93             | 2159.43            | 1.743                          | 601.35             | 1048.18            |
| A_68_P32019526 | chr19:23833634-23833678                           | NM_177034:291      | Apba1      | INSIDE                 | 0.434                                                        | 0.316                          | 3199.05            | 1011.68            | 0.137                          | 2026.58            | 278.31             |
| A_68_P32020394 | chr19:23967353-23967397                           | NM_177034:134009   | Apba1      | INSIDE                 | 0.562                                                        | 0.652                          | 3005.17            | 1959.66            | 0.367                          | 2419.60            | 886.99             |
| A_68_P32020393 | chr19:23967286-23967330                           | NM_177034:133943   | Apba1      | INSIDE                 | 0.559                                                        | 0.671                          | 1137.51            | 763.68             | 0.375                          | 900.18             | 337.78             |
| A_68_P23763025 | chr5:67011439-67011483                            | NM_001201413:-1404 | Apbb2      | PROMOTER               | 0.25                                                         | 0.396                          | 5366.57            | 2127.05            | 0.099                          | 3717.63            | 368.73             |
| A_68_P23763011 | chr5:67009509-67009553                            | NM_009686:380      | Apbb2      | INSIDE                 | 0.536                                                        | 16.129                         | 754.98             | 12177.33           | 8.638                          | 803.72             | 6942.66            |
| A_68_P31625259 | chr18:36839095-36839139                           | NM_146085:-96      | Apbb3      | PROMOTER               | 0.598                                                        | 0.688                          | 1834.41            | 1261.16            | 0.411                          | 1476.34            | 606.92             |
| A_68_P27282400 | chr10:79777704-79777748                           | NM_011789:13162    | Apc2       | INSIDE                 | 0.346                                                        | 9.162                          | 1131.27            | 10364.28           | 3.174                          | 924.27             | 2934.09            |
| A_68_P27282330 | chr10:79767570-79767614                           | NM_011789:3028     | Apc2       | INSIDE                 | 0.423                                                        | 5.917                          | 2652.13            | 15693.92           | 2.504                          | 2155.16            | 5396.95            |
| A_68_P27282404 | chr10:79778048-79778092                           | NM_011789:13506    | Apc2       | INSIDE                 | 0.553                                                        | 6.114                          | 1506.20            | 9209.21            | 3.384                          | 1294.89            | 4381.45            |
| A_68_P22346229 | chr3:95697870-95697914                            | NM_146104:-26      | Aph1a      | DIVERGENT_PROMOTER     | 0.331                                                        | 0.666                          | 2030.72            | 1352.07            | 0.22                           | 1503.98            | 331.32             |
| A_68_P21481086 | chr2:102914077-102914121                          | NM_019735:267      | Apip       | INSIDE                 | 0.497                                                        | 0.507                          | 1021.97            | 518.37             | 0.252                          | 837.99             | 211.11             |
| A_68_P32362520 | chrX:45387716-45387760                            | NM_013912:291      | Apln       | INSIDE                 | 0.202                                                        | 55.033                         | 2214.34            | 121861.10          | 11.096                         | 2614.70            | 29011.39           |
| A_68_P26399340 | chr9:31019173-31019217                            | NM_001102455:206   | Aplp2      | INSIDE                 | 0.375                                                        | 0.463                          | 1209.21            | 559.34             | 0.174                          | 995.96             | 172.82             |
| A_68_P26399336 | chr9:31018727-31018771                            | NM_001102455:652   | Aplp2      | INSIDE                 | 0.631                                                        | 5.929                          | 2106.35            | 12488.21           | 3.738                          | 1822.58            | 6813.65            |
| A_68_P26399347 | chr9:31020000-31020044                            | NM_001102455:-622  | Aplp2      | PROMOTER               | 0.653                                                        | 0.668                          | 2038.03            | 1360.81            | 0.436                          | 1529.19            | 667.20             |
| A_68_P22311543 | chr3:87862306-87862350                            | NM_144897:89       | Apoa1bp    | INSIDE                 | 0.334                                                        | 0.356                          | 2262.40            | 840.25             | 0.119                          | 1639.93            | 194.58             |
| A_68_P32538582 | chrX:91612233-91612277                            | NM_026673:-194     | Apoo       | PROMOTER               | 0.404                                                        | 6.152                          | 340.94             | 2097.46            | 2.485                          | 499.01             | 1240.16            |
| A_68_P32538581 | chrX:91612170-91612214                            | NM_026673:-256     | Apoo       | PROMOTER               | 0.517                                                        | 3.676                          | 1400.25            | 5146.88            | 1.9                            | 1652.90            | 3140.25            |
| A_68_P30927986 | chr16:85173922-85173966                           | NM_001198823:8     | App        | INSIDE                 | 0.476                                                        | 9.726                          | 1389.42            | 13512.94           | 4.627                          | 1216.14            | 5627.16            |
| A_68_P30927368 | chr16:85080443-85080487                           | NM_001198823:93488 | App        | INSIDE                 | 0.529                                                        | 3.207                          | 8528.77            | 27355.31           | 1.697                          | 5386.92            | 9143.93            |
| A_68_P27981860 | chr11:85048235-85048279                           | NM_025825:366      | Appbp2     | INSIDE                 | 0.56                                                         | 0.326                          | 1717.93            | 559.99             | 0.182                          | 1340.87            | 244.61             |
| A_68_P26234307 | chr8:125100918-125100973                          | NM_009698:-138     | Aprt       | PROMOTER               | 0.419                                                        | 0.428                          | 1534.08            | 656.86             | 0.179                          | 971.43             | 174.19             |
| A_68_P26234305 | chr8:125100749-125100793                          | NM_009698:37       | Aprt       | INSIDE                 | 0.545                                                        | 4.940                          | 7805.65            | 38558.67           | 2.691                          | 4890.72            | 13161.19           |
| A_68_P26234304 | chr8:125100653-125100697                          | NM_009698:133      | Aprt       | INSIDE                 | 0.652                                                        | 0.145                          | 4514.90            | 656.57             | 0.095                          | 2886.46            | 273.81             |

| ProbeName      | Target position of probe on CpG island microarray | TargetID          | GeneSymbol | CpG island Description | Ratio of relative methylation (TiO <sub>2</sub> -NP/Vehicle) | Sham group                     |                    |                    | TiO <sub>2</sub> -H group      |                    |                    |
|----------------|---------------------------------------------------|-------------------|------------|------------------------|--------------------------------------------------------------|--------------------------------|--------------------|--------------------|--------------------------------|--------------------|--------------------|
|                |                                                   |                   |            |                        |                                                              | Relative methylation (Cy5/Cy3) | Cy3 signal (Input) | Cy5 signal (MeDIP) | Relative methylation (Cy5/Cy3) | Cy3 signal (Input) | Cy5 signal (MeDIP) |
| A_68_P25352110 | chr7:104886718-104886762                          | NM_175105:17      | Aqp11      | INSIDE                 | 0.403                                                        | 0.218                          | 4572.41            | 997.56             | 0.088                          | 3350.12            | 294.83             |
| A_68_P25352107 | chr7:104886338-104886382                          | NM_175105:397     | Aqp11      | INSIDE                 | 0.614                                                        | 0.277                          | 2201.38            | 610.09             | 0.17                           | 1533.75            | 260.81             |
| A_68_P30481041 | chr15:99414682-99414726                           | NM_009699:5218    | Aqp2       | INSIDE                 | 0.215                                                        | 11.633                         | 1533.34            | 17837.99           | 2.5                            | 1297.93            | 3245.32            |
| A_68_P22860481 | chr4:41045310-41045354                            | NM_016689:-116    | Aqp3       | PROMOTER               | 0.517                                                        | 9.679                          | 1690.32            | 16360.74           | 5.001                          | 1340.27            | 6703.27            |
| A_68_P23742487 | chr5:63157563-63157607                            | NM_178407:-168    | Arap2      | PROMOTER               | 0.333                                                        | 10.026                         | 1057.81            | 10605.39           | 3.337                          | 1219.86            | 4070.49            |
| A_68_P30338802 | chr15:74503171-74503215                           | NM_018790:-192    | Arc        | PROMOTER               | 0.311                                                        | 8.053                          | 4305.23            | 34669.84           | 2.508                          | 3354.14            | 8411.27            |
| A_68_P26469462 | chr9:44575608-44575652                            | NM_145985:261     | Arcn1      | INSIDE                 | 0.575                                                        | 6.676                          | 1357.52            | 9062.68            | 3.836                          | 1117.28            | 4285.91            |
| A_68_P23887089 | chr5:91568885-91568929                            | NM_009704:266     | Areg       | INSIDE                 | 0.473                                                        | 0.473                          | 1189.06            | 562.53             | 0.224                          | 926.93             | 207.44             |
| A_68_P27835624 | chr11:59040902-59040946                           | NM_001130408:740  | Arf1       | INSIDE                 | 0.547                                                        | 0.319                          | 2680.44            | 856.33             | 0.175                          | 2151.75            | 375.85             |
| A_68_P27835630 | chr11:59041516-59041560                           | NM_001130408:126  | Arf1       | INSIDE                 | 0.644                                                        | 3.317                          | 1943.21            | 6445.09            | 2.137                          | 1591.19            | 3399.69            |
| A_68_P30476328 | chr15:98593484-98593528                           | NM_007478:43      | Arf3       | INSIDE                 | 0.469                                                        | 3.895                          | 4413.21            | 17187.39           | 1.825                          | 3374.57            | 6159.61            |
| A_68_P30476329 | chr15:98593570-98593614                           | NM_007478:-43     | Arf3       | PROMOTER               | 0.561                                                        | 0.476                          | 3276.38            | 1558.73            | 0.267                          | 2555.31            | 681.40             |
| A_68_P30476331 | chr15:98593814-98593858                           | NM_007478:-287    | Arf3       | PROMOTER               | 0.666                                                        | 0.219                          | 2306.22            | 505.29             | 0.146                          | 1666.52            | 243.24             |
| A_68_P30476322 | chr15:98592841-98592885                           | NM_007478:687     | Arf3       | INSIDE                 | 0.532                                                        | 0.741                          | 5681.86            | 4209.47            | 0.394                          | 4013.30            | 1581.73            |
| A_68_P21907446 | chr2:180702259-180702303                          | NM_001177706:276  | Arfgap1    | INSIDE                 | 0.583                                                        | 0.467                          | 1111.96            | 519.39             | 0.272                          | 890.84             | 242.71             |
| A_68_P30387839 | chr15:83180363-83180407                           | NM_025445:293     | Arfgap3    | INSIDE                 | 0.371                                                        | 12.151                         | 768.08             | 9332.71            | 4.513                          | 680.10             | 3069.49            |
| A_68_P20026600 | chr1:10222313-10222357                            | NM_001102430:417  | Arfgef1    | INSIDE                 | 0.578                                                        | 3.869                          | 1447.79            | 5601.42            | 2.237                          | 1195.71            | 2675.03            |
| A_68_P22291859 | chr3:84386912-84386956                            | NM_001081093:-387 | Arfp1      | PROMOTER               | 0.47                                                         | 0.545                          | 888.59             | 484.14             | 0.256                          | 680.89             | 174.47             |
| A_68_P25637835 | chr8:8689975-8690019                              | NM_176849:541     | Arglu1     | INSIDE                 | 0.5                                                          | 0.287                          | 2350.74            | 675.53             | 0.144                          | 1796.67            | 258.10             |
| A_68_P25637837 | chr8:8690176-8690220                              | NM_176849:339     | Arglu1     | INSIDE                 | 0.639                                                        | 3.949                          | 511.74             | 2020.94            | 2.523                          | 505.08             | 1274.31            |
| A_68_P21423815 | chr2:91490335-91490379                            | NM_146124:-3008   | Arhgap1    | PROMOTER               | 0.301                                                        | 0.627                          | 1125.46            | 705.27             | 0.188                          | 930.72             | 175.27             |
| A_68_P25983697 | chr8:80041774-80041818                            | NM_030113:10      | Arhgap10   | INSIDE                 | 0.244                                                        | 6.825                          | 10680.12           | 72889.35           | 1.665                          | 8987.47            | 14968.04           |
| A_68_P25983699 | chr8:80042123-80042167                            | NM_030113:-338    | Arhgap10   | PROMOTER               | 0.421                                                        | 0.470                          | 1102.93            | 518.40             | 0.198                          | 885.19             | 175.03             |
| A_68_P25983698 | chr8:80041949-80041993                            | NM_030113:-164    | Arhgap10   | PROMOTER               | 0.432                                                        | 13.077                         | 2952.21            | 38606.45           | 5.651                          | 2401.90            | 13572.75           |
| A_68_P21537143 | chr2:113688822-113688866                          | NM_181416:-26     | Arhgap11a  | PROMOTER               | 0.536                                                        | 4.018                          | 2017.21            | 8104.99            | 2.153                          | 1771.08            | 3813.04            |
| A_68_P28050583 | chr11:97301455-97301499                           | NM_021493:-9997   | Arhgap23   | PROMOTER               | 0.418                                                        | 5.036                          | 1199.34            | 6039.86            | 2.107                          | 1042.70            | 2197.36            |
| A_68_P28050940 | chr11:97361543-97361587                           | NM_021493:50091   | Arhgap23   | INSIDE                 | 0.56                                                         | 3.426                          | 1270.93            | 4354.73            | 1.92                           | 1005.57            | 1930.28            |
| A_68_P31315914 | chr17:68353306-68353350                           | NM_172964:120     | Arhgap28   | INSIDE                 | 0.321                                                        | 10.987                         | 2645.30            | 29062.82           | 3.524                          | 2225.79            | 7844.21            |
| A_68_P25032017 | chr7:31319995-31320040                            | NM_178252:11      | Arhgap33   | INSIDE                 | 0.263                                                        | 25.281                         | 21195.91           | 535863.30          | 6.642                          | 22042.91           | 146398.80          |
| A_68_P25032020 | chr7:31320429-31320474                            | NM_178252:-423    | Arhgap33   | PROMOTER               | 0.393                                                        | 0.246                          | 2556.07            | 629.10             | 0.097                          | 1794.29            | 173.41             |
| A_68_P25032021 | chr7:31320496-31320540                            | NM_178252:-490    | Arhgap33   | PROMOTER               | 0.55                                                         | 11.317                         | 3321.09            | 37585.47           | 6.223                          | 2855.13            | 17766.80           |
| A_68_P30350779 | chr15:76647508-76647552                           | NM_001168288:1070 | Arhgap39   | INSIDE                 | 0.26                                                         | 8.324                          | 1341.11            | 11163.26           | 2.168                          | 1294.99            | 2807.69            |
| A_68_P30350785 | chr15:76648219-76648263                           | NM_001168288:360  | Arhgap39   | INSIDE                 | 0.63                                                         | 0.602                          | 6059.45            | 3645.39            | 0.379                          | 4561.18            | 1729.75            |
| A_68_P30350786 | chr15:76648287-76648331                           | NM_001168288:292  | Arhgap39   | INSIDE                 | 0.528                                                        | 0.609                          | 1358.38            | 827.65             | 0.322                          | 1217.66            | 391.91             |
| A_68_P30350790 | chr15:76648746-76648790                           | NM_001168288:-168 | Arhgap39   | PROMOTER               | 0.387                                                        | 4.367                          | 1548.20            | 6760.46            | 1.688                          | 1303.95            | 2201.54            |
| A_68_P26295538 | chr9:9239294-9239338                              | NM_027823:-303    | Arhgap42   | PROMOTER               | 0.212                                                        | 6.750                          | 3709.82            | 25040.16           | 1.432                          | 2910.54            | 4169.03            |
| A_68_P27869724 | chr11:64976171-64976215                           | NM_001099288:271  | Arhgap44   | INSIDE                 | 0.666                                                        | 3.236                          | 1711.84            | 5539.12            | 2.156                          | 1463.02            | 3154.03            |
| A_68_P27535286 | chr10:126763506-126763550                         | NM_146011:2746    | Arhgap9    | INSIDE                 | 0.359                                                        | 0.558                          | 1171.88            | 653.37             | 0.2                            | 882.94             | 176.86             |
| A_68_P28185441 | chr11:120442461-120442505                         | NM_133796:452     | Arhgdia    | INSIDE                 | 0.666                                                        | 2.890                          | 3038.39            | 8781.06            | 1.925                          | 2472.44            | 4759.83            |
| A_68_P31108897 | chr17:26337756-26337800                           | NM_008113:517     | Arhgdig    | INSIDE                 | 0.195                                                        | 16.631                         | 3347.14            | 55664.70           | 3.251                          | 6027.07            | 19591.31           |
| A_68_P31108899 | chr17:26338048-26338092                           | NM_008113:225     | Arhgdig    | INSIDE                 | 0.388                                                        | 6.810                          | 1919.25            | 13069.63           | 2.643                          | 1723.23            | 4555.21            |
| A_68_P25677405 | chr8:14911386-14911430                            | NM_001037736:-308 | Arhgef10   | PROMOTER               | 0.486                                                        | 0.254                          | 2039.63            | 517.16             | 0.123                          | 1362.15            | 168.01             |
| A_68_P26459688 | chr9:42913910-42913954                            | NM_027144:-131    | Arhgef12   | PROMOTER               | 0.199                                                        | 10.349                         | 682.14             | 7059.17            | 2.058                          | 771.40             | 1587.72            |
| A_68_P23430516 | chr4:153673821-153673865                          | NM_001112744:162  | Arhgef16   | INSIDE                 | 0.368                                                        | 9.165                          | 3243.20            | 29723.34           | 3.372                          | 2526.48            | 8519.77            |
| A_68_P23430520 | chr4:153674348-153674392                          | NM_001112744:-366 | Arhgef16   | PROMOTER               | 0.478                                                        | 13.674                         | 3399.79            | 46488.63           | 6.533                          | 3173.06            | 20728.95           |
| A_68_P25370481 | chr7:108079952-108079996                          | NM_001081116:701  | Arhgef17   | INSIDE                 | 0.464                                                        | 5.471                          | 725.01             | 3966.48            | 2.541                          | 656.19             | 1667.06            |

| ProbeName      | Target position of probe on CpG island microarray | TargetID            | GeneSymbol | CpG island Description | Ratio of relative methylation (TiO <sub>2</sub> -NP/Vehicle) | Sham group                     |                    |                    | TiO <sub>2</sub> -H group      |                    |                    |
|----------------|---------------------------------------------------|---------------------|------------|------------------------|--------------------------------------------------------------|--------------------------------|--------------------|--------------------|--------------------------------|--------------------|--------------------|
|                |                                                   |                     |            |                        |                                                              | Relative methylation (Cy5/Cy3) | Cy3 signal (Input) | Cy5 signal (MeDIP) | Relative methylation (Cy5/Cy3) | Cy3 signal (Input) | Cy5 signal (MeDIP) |
| A_68_P25370486 | chr7:108080545-108080589                          | NM_001081116:109    | Arhgef17   | INSIDE                 | 0.299                                                        | 2.091                          | 1908.97            | 3990.73            | 0.624                          | 1614.52            | 1008.22            |
| A_68_P23362920 | chr4:140804003-140804047                          | NM_172520:5226      | Arhgef19   | INSIDE                 | 0.553                                                        | 9.774                          | 3724.69            | 36405.27           | 5.401                          | 2920.36            | 15771.75           |
| A_68_P23362916 | chr4:140803523-140803567                          | NM_172520:4746      | Arhgef19   | INSIDE                 | 0.596                                                        | 0.439                          | 3251.47            | 1428.68            | 0.262                          | 2186.12            | 572.16             |
| A_68_P22314836 | chr3:88425692-88425736                            | NM_001198912:399    | Arhgef2    | INSIDE                 | 0.131                                                        | 35.559                         | 2662.05            | 94661.16           | 4.652                          | 2101.99            | 9779.14            |
| A_68_P22186543 | chr3:62143850-62143894                            | NM_001081295:1174   | Arhgef26   | INSIDE                 | 0.495                                                        | 3.167                          | 2623.35            | 8307.41            | 1.568                          | 2025.90            | 3175.60            |
| A_68_P29486550 | chr14:28149011-28149055                           | NM_027871:97808     | Arhgef3    | INSIDE                 | 0.349                                                        | 1.682                          | 1690.47            | 2842.75            | 0.587                          | 1406.43            | 825.48             |
| A_68_P29604086 | chr14:52604738-52604782                           | NM_001145921:253    | Arhgef40   | INSIDE                 | 0.457                                                        | 0.190                          | 2595.39            | 492.49             | 0.087                          | 1979.71            | 171.49             |
| A_68_P25657174 | chr8:11728216-11728260                            | NM_001113517:134    | Arhgef7    | INSIDE                 | 0.433                                                        | 10.392                         | 2045.82            | 21261.04           | 4.499                          | 1743.99            | 7845.43            |
| A_68_P25657178 | chr8:11728695-11728739                            | NM_001113517:612    | Arhgef7    | INSIDE                 | 0.506                                                        | 9.351                          | 1875.82            | 17541.38           | 4.734                          | 1526.20            | 7224.88            |
| A_68_P25657382 | chr8:11758359-11758403                            | NM_001113518:51     | Arhgef7    | INSIDE                 | 0.644                                                        | 0.351                          | 1726.43            | 606.56             | 0.226                          | 1432.94            | 324.29             |
| A_68_P25657384 | chr8:11758629-11758673                            | NM_001113518:321    | Arhgef7    | INSIDE                 | 0.645                                                        | 0.727                          | 2060.47            | 1497.35            | 0.469                          | 1664.22            | 780.17             |
| A_68_P23319341 | chr4:133308432-133308476                          | NM_001080819:1072   | Arid1a     | INSIDE                 | 0.401                                                        | 4.681                          | 1404.46            | 6574.22            | 1.876                          | 1251.11            | 2347.29            |
| A_68_P23319375 | chr4:133312530-133312574                          | NM_001080819:-3026  | Arid1a     | PROMOTER               | 0.559                                                        | 0.446                          | 1466.38            | 654.50             | 0.249                          | 1211.29            | 302.11             |
| A_68_P31013736 | chr17:4994894-4994938                             | NM_001085355:-157   | Arid1b     | PROMOTER               | 0.255                                                        | 22.313                         | 6116.74            | 136485.30          | 5.701                          | 5500.12            | 31353.56           |
| A_68_P31013735 | chr17:4994646-4994690                             | NM_001085355:-405   | Arid1b     | PROMOTER               | 0.315                                                        | 13.975                         | 911.42             | 12736.74           | 4.396                          | 798.90             | 3511.84            |
| A_68_P31016358 | chr17:5342260-5342304                             | NM_001085355:347209 | Arid1b     | INSIDE                 | 0.56                                                         | 5.404                          | 1696.71            | 9168.42            | 3.023                          | 1031.12            | 3117.50            |
| A_68_P31013745 | chr17:4996367-4996411                             | NM_001085355:1315   | Arid1b     | INSIDE                 | 0.505                                                        | 3.108                          | 1066.15            | 3313.62            | 1.569                          | 899.88             | 1411.78            |
| A_68_P22864042 | chr4:41678377-41678421                            | NM_001017362:-224   | Arid3c     | PROMOTER               | 0.105                                                        | 2.389                          | 2605.58            | 6224.94            | 0.25                           | 1857.86            | 464.71             |
| A_68_P28836964 | chr13:14157071-14157115                           | NM_194262:1034      | Arid4b     | INSIDE                 | 0.663                                                        | 3.812                          | 925.47             | 3527.46            | 2.527                          | 791.59             | 2000.25            |
| A_68_P26553629 | chr9:59333798-59333842                            | NM_019927:361       | Arih1      | INSIDE                 | 0.365                                                        | 0.294                          | 2326.04            | 682.99             | 0.107                          | 1600.80            | 171.46             |
| A_68_P29050149 | chr13:54676413-54676457                           | NM_019968:61        | Arl10      | INSIDE                 | 0.509                                                        | 0.290                          | 2180.07            | 632.85             | 0.148                          | 1668.16            | 246.31             |
| A_68_P29342439 | chr13:114584551-114584595                         | NM_172595:-143      | Arl15      | PROMOTER               | 0.161                                                        | 37.695                         | 9408.92            | 354672.20          | 6.072                          | 9408.06            | 57126.91           |
| A_68_P29342438 | chr13:114584476-114584520                         | NM_172595:-217      | Arl15      | PROMOTER               | 0.537                                                        | 0.336                          | 1315.30            | 441.29             | 0.18                           | 1089.16            | 196.23             |
| A_68_P29342441 | chr13:114584714-114584758                         | NM_172595:21        | Arl15      | INSIDE                 | 0.308                                                        | 0.629                          | 1776.72            | 1118.34            | 0.194                          | 1466.85            | 284.68             |
| A_68_P29342444 | chr13:114585071-114585115                         | NM_172595:377       | Arl15      | INSIDE                 | 0.531                                                        | 2.619                          | 3632.87            | 9514.84            | 1.39                           | 2881.52            | 4004.09            |
| A_68_P31932931 | chr19:6140543-6140587                             | NM_019722:573       | Arl2       | INSIDE                 | 0.561                                                        | 0.561                          | 844.81             | 473.74             | 0.314                          | 667.24             | 209.79             |
| A_68_P32144718 | chr19:46647649-46647693                           | NM_019718:-95       | Arl3       | DIVERGENT_PROMOTER     | 0.123                                                        | 34.433                         | 2585.99            | 89042.10           | 4.241                          | 2281.63            | 9675.89            |
| A_68_P21219425 | chr2:52279775-52279819                            | NM_182994:598       | Arl5a      | INSIDE                 | 0.409                                                        | 0.455                          | 1030.59            | 468.59             | 0.186                          | 950.63             | 176.65             |
| A_68_P21219430 | chr2:52280336-52280380                            | NM_182994:36        | Arl5a      | INSIDE                 | 0.56                                                         | 3.729                          | 484.33             | 1805.88            | 2.087                          | 422.00             | 880.65             |
| A_68_P21023862 | chr2:14976924-14976968                            | NM_029466:-42       | Arl5b      | DIVERGENT_PROMOTER     | 0.431                                                        | 4.008                          | 1674.97            | 6712.52            | 1.725                          | 1405.08            | 2424.11            |
| A_68_P30796871 | chr16:59639170-59639214                           | NM_019665:-27       | Arl6       | PROMOTER               | 0.427                                                        | 0.710                          | 1141.19            | 810.49             | 0.303                          | 1067.59            | 324.00             |
| A_68_P24059369 | chr5:124566689-124566733                          | NM_144509:594       | Arl6ip4    | INSIDE                 | 0.631                                                        | 0.331                          | 1712.96            | 566.42             | 0.209                          | 1201.77            | 250.93             |
| A_68_P24059365 | chr5:124566113-124566157                          | NM_144509:18        | Arl6ip4    | INSIDE                 | 0.174                                                        | 1.902                          | 998.46             | 1899.12            | 0.332                          | 858.67             | 284.67             |
| A_68_P21224222 | chr2:53050731-53050775                            | NM_022989:-365      | Arl6ip6    | DIVERGENT_PROMOTER     | 0.381                                                        | 5.790                          | 833.48             | 4826.10            | 2.207                          | 653.54             | 1442.21            |
| A_68_P20637774 | chr1:137044071-137044115                          | NM_026823:682       | Arl8a      | INSIDE                 | 0.221                                                        | 23.373                         | 9316.81            | 217760.70          | 5.172                          | 11319.39           | 58544.86           |
| A_68_P20637766 | chr1:137043169-137043217                          | NM_026823:-218      | Arl8a      | PROMOTER               | 0.527                                                        | 0.525                          | 1077.99            | 565.81             | 0.277                          | 839.52             | 232.41             |
| A_68_P24735712 | chr6:108733427-108733471                          | NM_026011:396       | Arl8b      | INSIDE                 | 0.514                                                        | 2.695                          | 3105.15            | 8367.56            | 1.385                          | 2465.59            | 3415.02            |
| A_68_P27092475 | chr10:41737966-41738010                           | NM_001034858:200    | Armc2      | INSIDE                 | 0.489                                                        | 0.586                          | 1017.69            | 596.06             | 0.286                          | 724.81             | 207.61             |
| A_68_P28153743 | chr11:115336962-115337006                         | NM_177778:-6        | Armc7      | PROMOTER               | 0.439                                                        | 0.601                          | 909.77             | 547.15             | 0.264                          | 673.07             | 177.56             |
| A_68_P25288546 | chr7:91558357-91558401                            | NM_007488:91        | Arnt2      | INSIDE                 | 0.631                                                        | 4.215                          | 947.34             | 3993.04            | 2.661                          | 886.55             | 2359.12            |
| A_68_P24164319 | chr5:145875509-145875553                          | NM_023142:406       | Arpc1b     | INSIDE                 | 0.452                                                        | 0.353                          | 4586.14            | 1619.44            | 0.16                           | 3454.25            | 551.26             |
| A_68_P24164317 | chr5:145875247-145875291                          | NM_023142:144       | Arpc1b     | INSIDE                 | 0.478                                                        | 0.264                          | 5144.17            | 1359.81            | 0.126                          | 3476.33            | 439.15             |
| A_68_P24164318 | chr5:145875419-145875463                          | NM_023142:316       | Arpc1b     | INSIDE                 | 0.561                                                        | 0.372                          | 10857.19           | 4034.47            | 0.208                          | 8006.06            | 1669.03            |
| A_68_P24164316 | chr5:145875146-145875190                          | NM_023142:44        | Arpc1b     | INSIDE                 | 0.518                                                        | 0.635                          | 794.01             | 504.28             | 0.329                          | 729.61             | 239.83             |
| A_68_P20347398 | chr1:74283332-74283376                            | NM_029711:231       | Arpc2      | INSIDE                 | 0.347                                                        | 5.073                          | 4474.25            | 22698.19           | 1.762                          | 3529.81            | 6219.89            |
| A_68_P20347397 | chr1:74283180-74283224                            | NM_029711:79        | Arpc2      | INSIDE                 | 0.454                                                        | 0.444                          | 5913.98            | 2623.32            | 0.201                          | 5085.62            | 1024.48            |

| ProbeName      | Target position of probe on CpG island microarray | TargetID          | GeneSymbol | CpG island Description | Ratio of relative methylation (TiO <sub>2</sub> -NP/Vehicle) | Sham group                     |                    |                    | TiO <sub>2</sub> -H group      |                    |                    |
|----------------|---------------------------------------------------|-------------------|------------|------------------------|--------------------------------------------------------------|--------------------------------|--------------------|--------------------|--------------------------------|--------------------|--------------------|
|                |                                                   |                   |            |                        |                                                              | Relative methylation (Cy5/Cy3) | Cy3 signal (Input) | Cy5 signal (MeDIP) | Relative methylation (Cy5/Cy3) | Cy3 signal (Input) | Cy5 signal (MeDIP) |
| A_68_P24050080 | chr5:122842069-122842113                          | NM_019824:154     | Arpc3      | INSIDE                 | 0.61                                                         | 0.457                          | 4659.83            | 2130.88            | 0.279                          | 3438.11            | 959.23             |
| A_68_P22029201 | chr3:30498718-30498762                            | NM_029690:52      | Arpml      | INSIDE                 | 0.401                                                        | 0.562                          | 954.90             | 536.75             | 0.226                          | 740.64             | 167.05             |
| A_68_P27900652 | chr11:70246079-70246123                           | NM_145429:-54     | Arrb2      | PROMOTER               | 0.573                                                        | 5.407                          | 1166.29            | 6306.29            | 3.098                          | 910.97             | 2822.31            |
| A_68_P21068908 | chr2:24790503-24790547                            | NM_001162485:277  | Arrrdc1    | INSIDE                 | 0.206                                                        | 12.180                         | 3437.25            | 41864.51           | 2.507                          | 3046.25            | 7637.37            |
| A_68_P28118792 | chr11:109334732-109334776                         | NM_028710:67      | Arsg       | INSIDE                 | 0.546                                                        | 4.063                          | 2553.89            | 10376.97           | 2.219                          | 2094.11            | 4646.90            |
| A_68_P31754305 | chr18:61071638-61071682                           | NM_001038499:-233 | Arsi       | PROMOTER               | 0.646                                                        | 0.400                          | 2206.38            | 881.90             | 0.258                          | 1694.14            | 437.22             |
| A_68_P23237353 | chr4:117599338-117599382                          | NM_009711:3008    | Artm       | INSIDE                 | 0.533                                                        | 3.952                          | 780.59             | 3084.84            | 2.105                          | 607.68             | 1279.33            |
| A_68_P30579184 | chr16:18348951-18348995                           | NM_033474:606     | Arvcf      | INSIDE                 | 0.515                                                        | 3.118                          | 3145.91            | 9807.42            | 1.605                          | 2339.66            | 3755.38            |
| A_68_P30579425 | chr16:18392661-18392705                           | NM_033474:44316   | Arvcf      | INSIDE                 | 0.626                                                        | 3.474                          | 632.67             | 2197.84            | 2.174                          | 554.37             | 1205.47            |
| A_68_P32533286 | chrX:90544628-90544672                            | NM_007492:12666   | Arx        | DOWNSTREAM             | 0.223                                                        | 17.380                         | 1351.17            | 23483.81           | 3.884                          | 2098.17            | 8150.20            |
| A_68_P32533249 | chrX:90540139-90540183                            | NM_007492:8176    | Arx        | INSIDE                 | 0.302                                                        | 6.159                          | 1354.71            | 8343.20            | 1.862                          | 1453.43            | 2706.32            |
| A_68_P32533200 | chrX:90534061-90534105                            | NM_007492:2098    | Arx        | INSIDE                 | 0.424                                                        | 44.439                         | 3266.16            | 145143.40          | 18.854                         | 3580.27            | 67501.87           |
| A_68_P32533199 | chrX:90533865-90533909                            | NM_007492:1902    | Arx        | INSIDE                 | 0.59                                                         | 3.593                          | 1575.62            | 5660.86            | 2.12                           | 2086.58            | 4422.73            |
| A_68_P32533248 | chrX:90540027-90540071                            | NM_007492:8064    | Arx        | INSIDE                 | 0.59                                                         | 2.462                          | 2115.80            | 5208.13            | 1.452                          | 2828.26            | 4107.90            |
| A_68_P25810707 | chr8:42459909-42459953                            | NM_019734:121     | Asah1      | INSIDE                 | 0.359                                                        | 1.428                          | 1392.98            | 1988.59            | 0.512                          | 1069.63            | 548.17             |
| A_68_P30281416 | chr15:64214267-64214311                           | NM_010026:193     | Asap1      | INSIDE                 | 0.507                                                        | 3.679                          | 1222.24            | 4497.23            | 1.865                          | 1026.85            | 1915.02            |
| A_68_P30281411 | chr15:64213769-64213813                           | NM_010026:691     | Asap1      | INSIDE                 | 0.587                                                        | 3.144                          | 991.27             | 3116.73            | 1.846                          | 822.59             | 1518.24            |
| A_68_P30280959 | chr15:64144695-64144739                           | NM_010026:69765   | Asap1      | INSIDE                 | 0.636                                                        | 2.791                          | 580.35             | 1619.51            | 1.776                          | 635.20             | 1128.04            |
| A_68_P33008885 | chr12:21117800-21117844                           | NM_001004364:206  | Asap2      | INSIDE                 | 0.229                                                        | 17.188                         | 2545.90            | 43757.60           | 3.936                          | 2257.04            | 8883.92            |
| A_68_P23332631 | chr4:135762030-135762074                          | NM_001008232:-227 | Asap3      | PROMOTER               | 0.145                                                        | 1.928                          | 4022.35            | 7754.17            | 0.279                          | 2910.57            | 812.93             |
| A_68_P23332632 | chr4:135762182-135762226                          | NM_001008232:-75  | Asap3      | PROMOTER               | 0.151                                                        | 4.326                          | 16120.08           | 69727.68           | 0.652                          | 11733.37           | 7655.58            |
| A_68_P20443148 | chr1:93437540-93437584                            | NM_023046:-94     | Asb1       | PROMOTER               | 0.501                                                        | 0.500                          | 940.66             | 469.94             | 0.25                           | 823.50             | 206.08             |
| A_68_P20433330 | chr1:91889460-91889504                            | NM_139152:21670   | Asb18      | INSIDE                 | 0.168                                                        | 2.456                          | 1092.40            | 2682.52            | 0.412                          | 828.99             | 341.95             |
| A_68_P27681337 | chr11:30854282-30854326                           | NM_023906:-93     | Asb3       | DIVERGENT_PROMOTER     | 0.283                                                        | 25.365                         | 8046.42            | 204097.50          | 7.185                          | 7609.80            | 54673.64           |
| A_68_P21105464 | chr2:30683897-30683941                            | NM_133346:-98     | Asb6       | PROMOTER               | 0.383                                                        | 4.949                          | 2323.15            | 11496.36           | 1.894                          | 1998.46            | 3785.38            |
| A_68_P21105459 | chr2:30683485-30683529                            | NM_133346:314     | Asb6       | INSIDE                 | 0.611                                                        | 3.433                          | 993.67             | 3411.64            | 2.099                          | 780.50             | 1638.38            |
| A_68_P21105458 | chr2:30683380-30683424                            | NM_133346:418     | Asb6       | INSIDE                 | 0.488                                                        | 0.491                          | 905.46             | 444.84             | 0.24                           | 792.63             | 190.20             |
| A_68_P21105462 | chr2:30683743-30683787                            | NM_133346:56      | Asb6       | INSIDE                 | 0.656                                                        | 2.121                          | 2852.54            | 6050.69            | 1.392                          | 2224.71            | 3097.74            |
| A_68_P30473398 | chr15:97975961-97976005                           | NM_001170710:151  | Asb8       | INSIDE                 | 0.224                                                        | 7.646                          | 2546.78            | 19471.75           | 1.712                          | 2223.96            | 3807.40            |
| A_68_P30473400 | chr15:97976195-97976240                           | NM_001170710:-84  | Asb8       | PROMOTER               | 0.597                                                        | 0.408                          | 1214.04            | 495.43             | 0.244                          | 896.31             | 218.31             |
| A_68_P30473396 | chr15:97975808-97975852                           | NM_001170710:303  | Asb8       | INSIDE                 | 0.409                                                        | 0.588                          | 863.78             | 508.26             | 0.24                           | 755.62             | 181.65             |
| A_68_P27171931 | chr10:59465553-59465597                           | NM_026937:22      | Ascc1      | INSIDE                 | 0.282                                                        | 7.689                          | 2104.85            | 16183.86           | 2.169                          | 1866.26            | 4047.93            |
| A_68_P27558727 | chr11:4537643-4537687                             | NM_029291:-131    | Ascc2      | DIVERGENT_PROMOTER     | 0.277                                                        | 10.673                         | 3195.12            | 34102.66           | 2.953                          | 3448.02            | 10183.57           |
| A_68_P27558730 | chr11:4537928-4537972                             | NM_029291:155     | Ascc2      | INSIDE                 | 0.472                                                        | 17.408                         | 1415.17            | 24634.89           | 8.209                          | 1369.98            | 11246.63           |
| A_68_P27129526 | chr10:50312500-50312544                           | NM_001146089:48   | Ascc3      | INSIDE                 | 0.206                                                        | 29.406                         | 1618.80            | 47602.77           | 0.607                          | 1398.94            | 8487.91            |
| A_68_P27320006 | chr10:86956365-86956409                           | NM_008553:19      | Ascl1      | INSIDE                 | 0.639                                                        | 0.418                          | 1195.03            | 498.99             | 0.267                          | 976.15             | 260.52             |
| A_68_P25597935 | chr7:150155005-150155050                          | NM_008554:142     | Ascl2      | INSIDE                 | 0.57                                                         | 2.632                          | 1464.25            | 3854.16            | 1.5                            | 1175.69            | 1763.67            |
| A_68_P25597928 | chr7:150154114-150154158                          | NM_008554:1033    | Ascl2      | INSIDE                 | 0.646                                                        | 0.623                          | 730.11             | 455.21             | 0.403                          | 656.10             | 264.22             |
| A_68_P27311153 | chr10:85391455-85391499                           | NM_001163614:241  | Ascl4      | INSIDE                 | 0.425                                                        | 10.774                         | 1456.97            | 15697.96           | 4.578                          | 1348.39            | 6172.43            |
| A_68_P26017300 | chr8:86479980-86480024                            | NM_024184:410     | Asflb      | INSIDE                 | 0.481                                                        | 0.244                          | 2034.29            | 497.36             | 0.118                          | 1499.61            | 176.39             |
| A_68_P26017297 | chr8:86479743-86479787                            | NM_024184:172     | Asflb      | INSIDE                 | 0.605                                                        | 0.693                          | 3015.12            | 2090.95            | 0.419                          | 2342.28            | 982.31             |
| A_68_P26017299 | chr8:86479898-86479942                            | NM_024184:328     | Asflb      | INSIDE                 | 0.511                                                        | 0.613                          | 1182.23            | 724.28             | 0.313                          | 902.86             | 282.38             |
| A_68_P20231550 | chr1:53409540-53409584                            | NM_133728:-19     | Asnsd1     | PROMOTER               | 0.418                                                        | 6.719                          | 1721.19            | 11564.59           | 2.807                          | 1582.05            | 4440.25            |
| A_68_P20231549 | chr1:53409460-53409504                            | NM_133728:61      | Asnsd1     | INSIDE                 | 0.463                                                        | 10.864                         | 1579.45            | 17158.58           | 5.031                          | 1329.04            | 6686.92            |
| A_68_P20231548 | chr1:53409367-53409411                            | NM_133728:155     | Asnsd1     | INSIDE                 | 0.648                                                        | 0.322                          | 2192.29            | 706.62             | 0.209                          | 1763.07            | 368.04             |
| A_68_P25503171 | chr7:134093152-134093196                          | NM_001039645:-79  | Asphd1     | DIVERGENT_PROMOTER     | 0.189                                                        | 8.113                          | 2060.39            | 16716.67           | 1.532                          | 1465.99            | 2245.27            |

| ProbeName      | Target position of probe on CpG island microarray | TargetID            | GeneSymbol  | CpG island Description | Ratio of relative methylation (TiO <sub>2</sub> -NP/Vehicle) | Sham group                     |                    |                    | TiO <sub>2</sub> -H group      |                    |                    |
|----------------|---------------------------------------------------|---------------------|-------------|------------------------|--------------------------------------------------------------|--------------------------------|--------------------|--------------------|--------------------------------|--------------------|--------------------|
|                |                                                   |                     |             |                        |                                                              | Relative methylation (Cy5/Cy3) | Cy3 signal (Input) | Cy5 signal (MeDIP) | Relative methylation (Cy5/Cy3) | Cy3 signal (Input) | Cy5 signal (MeDIP) |
| A_68_P23991928 | chr5:112823693-112823737                          | NM_028386:2481      | Asphd2      | PROMOTER               | 0.141                                                        | 29.357                         | 2689.70            | 78960.65           | 4.125                          | 2458.65            | 10143.01           |
| A_68_P21109298 | chr2:31325552-31325596                            | NM_007494:-215      | Ass1        | PROMOTER               | 0.59                                                         | 0.615                          | 1391.22            | 855.19             | 0.362                          | 1054.89            | 382.30             |
| A_68_P20753949 | chr1:160293080-160293124                          | NM_001205204:668    | Astn1       | INSIDE                 | 0.418                                                        | 3.382                          | 5789.92            | 19583.99           | 1.415                          | 4515.28            | 6387.81            |
| A_68_P21754297 | chr2:153171289-153171333                          | NM_001039939:-564   | Asxl1       | PROMOTER               | 0.309                                                        | 6.303                          | 5042.30            | 31779.96           | 1.949                          | 3913.71            | 7629.50            |
| A_68_P31549437 | chr18:22502988-22503032                           | NM_001167777:-579   | Asxl3       | PROMOTER               | 0.566                                                        | 2.797                          | 1304.10            | 3647.69            | 1.584                          | 1150.97            | 1822.88            |
| A_68_P30246249 | chr15:57966345-57966389                           | NM_027435:271       | Atad2       | INSIDE                 | 0.485                                                        | 16.744                         | 2155.68            | 36095.73           | 8.129                          | 1737.41            | 14123.35           |
| A_68_P28203004 | chr12:4924079-4924123                             | NM_001099628:-58    | Atad2b      | DIVERGENT_PROMOTER     | 0.322                                                        | 13.295                         | 956.30             | 12714.42           | 4.287                          | 914.87             | 3921.77            |
| A_68_P25522112 | chr7:137663073-137663117                          | NM_013799:-41       | Ate1        | PROMOTER               | 0.456                                                        | 0.290                          | 1514.61            | 439.86             | 0.132                          | 1275.82            | 169.01             |
| A_68_P25522114 | chr7:137663333-137663377                          | NM_013799:-301      | Ate1        | PROMOTER               | 0.519                                                        | 0.258                          | 1849.09            | 476.31             | 0.134                          | 1342.49            | 179.45             |
| A_68_P21334154 | chr2:73729891-73729935                            | NM_001025093:773    | Atf2        | INSIDE                 | 0.202                                                        | 47.307                         | 12297.10           | 581737.50          | 9.562                          | 16240.60           | 155295.50          |
| A_68_P20936661 | chr1:193006674-193006718                          | NM_007498:516       | Atf3        | INSIDE                 | 0.414                                                        | 13.600                         | 4219.52            | 57387.54           | 5.634                          | 3382.11            | 19054.22           |
| A_68_P20936664 | chr1:193006949-193006993                          | NM_007498:242       | Atf3        | INSIDE                 | 0.602                                                        | 0.611                          | 947.23             | 579.00             | 0.368                          | 832.23             | 306.47             |
| A_68_P30371087 | chr15:80085930-80085974                           | NM_009716:339       | Atf4        | INSIDE                 | 0.356                                                        | 0.223                          | 3113.78            | 693.61             | 0.079                          | 2168.61            | 171.80             |
| A_68_P31155038 | chr17:34784397-34784441                           | NM_017406:294       | Atf6b       | INSIDE                 | 0.103                                                        | 181.135                        | 622.77             | 112806.10          | 18.667                         | 794.84             | 14837.48           |
| A_68_P31155039 | chr17:34784544-34784588                           | NM_017406:442       | Atf6b       | INSIDE                 | 0.463                                                        | 3.421                          | 2073.56            | 7093.21            | 1.583                          | 1697.76            | 2687.39            |
| A_68_P30498877 | chr15:102455880-102455924                         | NM_146065:-50       | Atf7        | PROMOTER               | 0.508                                                        | 0.657                          | 1093.02            | 717.61             | 0.334                          | 878.11             | 293.07             |
| A_68_P24766862 | chr6:114688350-114688394                          | NM_028835:95230     | Atg7        | INSIDE                 | 0.307                                                        | 9.117                          | 2760.25            | 25166.17           | 2.803                          | 2371.64            | 6647.30            |
| A_68_P24766863 | chr6:114688424-114688468                          | NM_028835:95304     | Atg7        | INSIDE                 | 0.453                                                        | 4.358                          | 771.37             | 3361.63            | 1.975                          | 695.44             | 1373.61            |
| A_68_P31940129 | chr19:7568996-7569040                             | NM_146091:91        | Ati3        | INSIDE                 | 0.439                                                        | 0.473                          | 1013.89            | 479.77             | 0.208                          | 862.45             | 179.24             |
| A_68_P24816773 | chr6:124696183-124696227                          | NM_007881:10301     | Atn1        | INSIDE                 | 0.598                                                        | 8.239                          | 1742.74            | 14358.73           | 4.931                          | 1473.53            | 7265.70            |
| A_68_P24816767 | chr6:124695514-124695558                          | NM_007881:10969     | Atn1        | INSIDE                 | 0.211                                                        | 7.605                          | 1557.09            | 11841.54           | 1.604                          | 1425.49            | 2286.38            |
| A_68_P24816768 | chr6:124695641-124695685                          | NM_007881:10843     | Atn1        | INSIDE                 | 0.353                                                        | 4.055                          | 1784.62            | 7236.45            | 1.43                           | 1391.80            | 1990.71            |
| A_68_P24540594 | chr6:72185394-72185438                            | NM_153778:155       | Atoh8       | INSIDE                 | 0.63                                                         | 4.633                          | 1455.47            | 6743.86            | 2.919                          | 1126.07            | 3287.49            |
| A_68_P22055028 | chr3:35652851-35652895                            | NM_029570:-187      | Atp11b      | PROMOTER               | 0.361                                                        | 0.354                          | 2854.94            | 1011.27            | 0.128                          | 2163.39            | 276.48             |
| A_68_P32414051 | chrX:57657552-57657596                            | NM_001001798:-418   | Atp11c      | PROMOTER               | 0.318                                                        | 9.381                          | 1166.03            | 10938.67           | 2.979                          | 1137.94            | 3389.47            |
| A_68_P25947954 | chr8:72315394-72315438                            | NM_133224:355       | Atp13a1     | INSIDE                 | 0.411                                                        | 8.619                          | 950.43             | 8192.09            | 3.546                          | 819.31             | 2905.60            |
| A_68_P30641650 | chr16:30388204-30388248                           | NM_001128094:390    | Atp13a3     | INSIDE                 | 0.543                                                        | 0.409                          | 2639.83            | 1079.03            | 0.222                          | 1938.47            | 430.59             |
| A_68_P22376195 | chr3:101408231-101408275                          | NM_144900:328       | Atp1a1      | INSIDE                 | 0.261                                                        | 15.877                         | 2146.93            | 34087.12           | 4.136                          | 2098.90            | 8681.54            |
| A_68_P22376192 | chr3:101407957-101408001                          | NM_144900:602       | Atp1a1      | INSIDE                 | 0.451                                                        | 5.702                          | 657.73             | 3750.18            | 2.573                          | 580.21             | 1492.99            |
| A_68_P25007802 | chr7:25790777-25790821                            | NM_144921:116       | Atp1a3      | INSIDE                 | 0.49                                                         | 0.585                          | 1370.48            | 801.31             | 0.287                          | 1124.10            | 322.34             |
| A_68_P24050675 | chr5:122951393-122951437                          | NM_009722:820       | Atp2a2      | INSIDE                 | 0.198                                                        | 1.830                          | 1258.56            | 2303.71            | 0.362                          | 965.00             | 349.71             |
| A_68_P27914258 | chr11:72775141-72775185                           | NM_001163336:492    | Atp2a3      | INSIDE                 | 0.253                                                        | 8.395                          | 770.61             | 6469.44            | 2.127                          | 793.41             | 1687.42            |
| A_68_P27383821 | chr10:98377167-98377211                           | NM_026482:-597      | Atp2b1      | PROMOTER               | 0.651                                                        | 2.543                          | 857.79             | 2181.74            | 1.657                          | 647.67             | 1073.14            |
| A_68_P24761302 | chr6:113698581-113698626                          | NM_001036684:142767 | Atp2b2      | INSIDE                 | 0.191                                                        | 3.042                          | 4408.14            | 13407.99           | 0.581                          | 2901.24            | 1686.99            |
| A_68_P32463053 | chrX:70748921-70748965                            | NM_177236:518       | Atp2b3      | INSIDE                 | 0.414                                                        | 3.885                          | 3303.23            | 12834.40           | 1.607                          | 3892.93            | 6256.04            |
| A_68_P26797759 | chr9:105397652-105397696                          | NM_175025:-227      | Atp2c1      | PROMOTER               | 0.316                                                        | 0.244                          | 2994.50            | 730.33             | 0.077                          | 2194.94            | 169.24             |
| A_68_P31849681 | chr18:78012952-78012997                           | NM_007505:468       | Atp5a1      | INSIDE                 | 0.274                                                        | 0.291                          | 2558.21            | 743.17             | 0.08                           | 2185.85            | 174.23             |
| A_68_P31849682 | chr18:78013054-78013098                           | NM_007505:570       | Atp5a1      | INSIDE                 | 0.53                                                         | 0.577                          | 6724.15            | 3880.20            | 0.306                          | 5350.17            | 1635.64            |
| A_68_P20998751 | chr2:10001887-10001931                            | NM_001112738:229    | Atp5c1      | INSIDE                 | 0.204                                                        | 0.562                          | 1953.31            | 1097.46            | 0.115                          | 1492.55            | 171.18             |
| A_68_P21875562 | chr2:174289603-174289647                          | NM_025983:-22       | Atp5e       | PROMOTER               | 0.374                                                        | 7.114                          | 1738.14            | 12365.53           | 2.661                          | 1467.91            | 3905.91            |
| A_68_P21334258 | chr2:73748716-73748760                            | NM_175015:613       | Atp5g3      | INSIDE                 | 0.567                                                        | 0.477                          | 2129.32            | 1015.57            | 0.27                           | 1681.66            | 454.65             |
| A_68_P28071366 | chr11:100870700-100870746                         | NM_016920:-46       | Atp6v0a1    | PROMOTER               | 0.465                                                        | 11.907                         | 885.96             | 10549.42           | 5.54                           | 836.99             | 4636.54            |
| A_68_P28071367 | chr11:100870778-100870822                         | NM_016920:32        | Atp6v0a1    | INSIDE                 | 0.371                                                        | 0.592                          | 877.38             | 519.75             | 0.22                           | 783.33             | 172.24             |
| A_68_P23237067 | chr4:117559785-117559829                          | NM_033617:128       | Atp6v0b     | INSIDE                 | 0.584                                                        | 0.122                          | 4283.81            | 523.06             | 0.071                          | 2633.95            | 187.83             |
| A_68_P31095796 | chr17:24306345-24306389                           | NR_037854:-26       | Atp6v0c-ps2 | PROMOTER               | 0.315                                                        | 0.283                          | 2529.62            | 715.47             | 0.089                          | 1876.49            | 167.21             |
| A_68_P31095792 | chr17:24305949-24305993                           | NR_037854:370       | Atp6v0c-ps2 | INSIDE                 | 0.664                                                        | 0.594                          | 10291.75           | 6118.01            | 0.395                          | 6619.88            | 2612.91            |

| ProbeName      | Target position of probe on CpG island microarray | TargetID          | GeneSymbol  | CpG island Description | Ratio of relative methylation (TiO <sub>2</sub> -NP/Vehicle) | Sham group                     |                    |                    | TiO <sub>2</sub> -H group      |                    |                    |
|----------------|---------------------------------------------------|-------------------|-------------|------------------------|--------------------------------------------------------------|--------------------------------|--------------------|--------------------|--------------------------------|--------------------|--------------------|
|                |                                                   |                   |             |                        |                                                              | Relative methylation (Cy5/Cy3) | Cy3 signal (Input) | Cy5 signal (MeDIP) | Relative methylation (Cy5/Cy3) | Cy3 signal (Input) | Cy5 signal (MeDIP) |
| A_68_P31095793 | chr17:24306024-24306068                           | NR_037854:294     | Atp6v0c-ps2 | INSIDE                 | 0.429                                                        | 0.635                          | 4908.54            | 3115.17            | 0.272                          | 3174.62            | 863.84             |
| A_68_P26134609 | chr8:108089863-108089907                          | NM_013477:56      | Atp6v0d1    | INSIDE                 | 0.582                                                        | 2.922                          | 3761.11            | 10990.97           | 1.699                          | 3063.78            | 5206.44            |
| A_68_P26134611 | chr8:108090115-108090160                          | NM_013477:-197    | Atp6v0d1    | PROMOTER               | 0.621                                                        | 0.264                          | 2188.98            | 578.96             | 0.164                          | 1461.52            | 240.24             |
| A_68_P31111775 | chr17:26813633-26813677                           | NM_025272:314     | Atp6v0e     | INSIDE                 | 0.257                                                        | 0.280                          | 3044.64            | 852.70             | 0.072                          | 2334.10            | 168.28             |
| A_68_P30150544 | chr15:38591583-38591627                           | NM_025494:-54     | Atp6v1c1    | PROMOTER               | 0.35                                                         | 8.199                          | 1552.06            | 12726.03           | 2.869                          | 1442.73            | 4139.86            |
| A_68_P30150543 | chr15:38591462-38591506                           | NM_025494:-174    | Atp6v1c1    | PROMOTER               | 0.539                                                        | 6.450                          | 383.67             | 2474.74            | 3.476                          | 379.46             | 1319.02            |
| A_68_P22971150 | chr4:63206034-63206078                            | NM_024173:258     | Atp6v1g1    | INSIDE                 | 0.363                                                        | 11.696                         | 2488.16            | 29102.18           | 4.243                          | 2253.30            | 9560.27            |
| A_68_P31158465 | chr17:35373569-35373613                           | NM_023179:50      | Atp6v1g2    | INSIDE                 | 0.335                                                        | 0.396                          | 2034.36            | 804.59             | 0.133                          | 1304.60            | 173.03             |
| A_68_P31158463 | chr17:35373372-35373416                           | NM_023179:-146    | Atp6v1g2    | DIVERGENT_PROMOTER     | 0.361                                                        | 4.038                          | 2907.83            | 11741.85           | 1.458                          | 2158.07            | 3146.11            |
| A_68_P23770428 | chr5:6823836-68238380                             | NM_00103899:312   | Atp8a1      | INSIDE                 | 0.44                                                         | 5.129                          | 4939.15            | 25334.33           | 2.258                          | 4175.99            | 9431.23            |
| A_68_P23770432 | chr5:68238811-68238855                            | NM_00103899:-162  | Atp8a1      | PROMOTER               | 0.569                                                        | 0.534                          | 2501.39            | 1335.59            | 0.304                          | 1894.21            | 575.47             |
| A_68_P23770429 | chr5:68238413-68238457                            | NM_00103899:236   | Atp8a1      | INSIDE                 | 0.419                                                        | 0.637                          | 982.62             | 625.48             | 0.267                          | 702.86             | 187.61             |
| A_68_P31776707 | chr18:64820614-64820658                           | NM_001001488:18   | Atp8b1      | INSIDE                 | 0.445                                                        | 5.226                          | 854.92             | 4467.76            | 2.326                          | 671.53             | 1562.29            |
| A_68_P22322686 | chr3:89766925-89766969                            | NM_001081182:484  | Atp8b2      | INSIDE                 | 0.532                                                        | 0.125                          | 3819.65            | 476.67             | 0.066                          | 2646.49            | 175.65             |
| A_68_P21843263 | chr2:168567207-168567251                          | NM_015731:72      | Atp9a       | INSIDE                 | 0.631                                                        | 3.113                          | 524.70             | 1633.29            | 1.964                          | 526.67             | 1034.62            |
| A_68_P31867752 | chr18:81130655-81130699                           | NM_001201569:121  | Atp9b       | INSIDE                 | 0.416                                                        | 6.837                          | 3871.77            | 26472.11           | 2.842                          | 3528.77            | 10029.39           |
| A_68_P26818137 | chr9:108976539-108976583                          | NM_172774:78      | Atrip       | INSIDE                 | 0.547                                                        | 0.195                          | 4862.55            | 947.72             | 0.107                          | 3251.02            | 346.52             |
| A_68_P26818136 | chr9:108976442-108976486                          | NM_172774:174     | Atrip       | INSIDE                 | 0.553                                                        | 0.376                          | 3491.50            | 1312.16            | 0.208                          | 2584.46            | 537.40             |
| A_68_P21632194 | chr2:130732229-130732273                          | NM_009730:19      | Atrn        | INSIDE                 | 0.398                                                        | 11.616                         | 1432.49            | 16639.77           | 4.621                          | 1291.28            | 5966.57            |
| A_68_P32208220 | chr19:57685997-57686041                           | NM_181415:495     | Atrn1       | INSIDE                 | 0.537                                                        | 0.515                          | 917.76             | 472.58             | 0.276                          | 691.88             | 191.19             |
| A_68_P32582134 | chrX:103123764-103123808                          | NM_009530:925     | Atrx        | INSIDE                 | 0.079                                                        | 24.687                         | 305.36             | 7538.42            | 1.939                          | 409.82             | 794.62             |
| A_68_P29005205 | chr13:46060754-46060798                           | NM_009124:-431    | Atxn1       | PROMOTER               | 0.424                                                        | 7.608                          | 1221.90            | 9296.76            | 3.227                          | 1029.85            | 3323.52            |
| A_68_P29005211 | chr13:46061364-46061408                           | NM_009124:-1041   | Atxn1       | PROMOTER               | 0.505                                                        | 5.234                          | 3191.72            | 16705.31           | 2.644                          | 3111.43            | 8226.40            |
| A_68_P29005199 | chr13:46059825-46059869                           | NM_009124:499     | Atxn1       | INSIDE                 | 0.531                                                        | 5.742                          | 1233.97            | 7086.02            | 3.052                          | 1189.34            | 3629.99            |
| A_68_P29005193 | chr13:46058757-46058801                           | NM_009124:1567    | Atxn1       | INSIDE                 | 0.541                                                        | 0.185                          | 5517.58            | 1020.92            | 0.1                            | 3982.21            | 398.59             |
| A_68_P29005200 | chr13:46059987-46060031                           | NM_009124:337     | Atxn1       | INSIDE                 | 0.584                                                        | 0.436                          | 2124.88            | 926.84             | 0.255                          | 1625.85            | 414.13             |
| A_68_P29002651 | chr13:45663653-45663697                           | NM_009124:396671  | Atxn1       | INSIDE                 | 0.27                                                         | 5.658                          | 3119.13            | 17647.65           | 1.528                          | 2455.06            | 3751.67            |
| A_68_P26158736 | chr8:112261757-112261801                          | NM_001080930:-139 | Atxn11      | PROMOTER               | 0.271                                                        | 6.085                          | 2011.37            | 12239.72           | 1.65                           | 1636.60            | 2700.16            |
| A_68_P24046040 | chr5:122161910-122161954                          | NM_009125:315     | Atxn2       | INSIDE                 | 0.485                                                        | 4.470                          | 1795.27            | 8024.61            | 2.169                          | 1471.15            | 3191.59            |
| A_68_P24046043 | chr5:122162421-122162465                          | NM_009125:825     | Atxn2       | INSIDE                 | 0.577                                                        | 3.912                          | 1938.90            | 7585.64            | 2.259                          | 1569.75            | 3546.52            |
| A_68_P24046045 | chr5:122162695-122162739                          | NM_009125:1099    | Atxn2       | INSIDE                 | 0.639                                                        | 0.688                          | 2600.89            | 1789.98            | 0.44                           | 1941.80            | 854.28             |
| A_68_P24046049 | chr5:122163217-122163261                          | NM_009125:1621    | Atxn2       | INSIDE                 | 0.436                                                        | 1.360                          | 2675.89            | 3638.37            | 0.593                          | 2205.75            | 1307.05            |
| A_68_P25500901 | chr7:133645946-133645990                          | NM_183020:848     | Atxn21      | INSIDE                 | 0.209                                                        | 0.516                          | 3770.21            | 1946.87            | 0.108                          | 2657.76            | 287.23             |
| A_68_P25500905 | chr7:133646409-133646453                          | NM_183020:386     | Atxn21      | INSIDE                 | 0.362                                                        | 7.133                          | 1783.74            | 12724.24           | 2.585                          | 1683.88            | 4352.63            |
| A_68_P25500909 | chr7:133646766-133646810                          | NM_183020:28      | Atxn21      | INSIDE                 | 0.536                                                        | 0.529                          | 2387.50            | 1262.52            | 0.283                          | 1843.71            | 522.50             |
| A_68_P25500897 | chr7:133645570-133645614                          | NM_183020:1224    | Atxn21      | INSIDE                 | 0.624                                                        | 0.637                          | 3532.65            | 2251.82            | 0.398                          | 2754.98            | 1096.48            |
| A_68_P25500900 | chr7:133645875-133645919                          | NM_183020:920     | Atxn21      | INSIDE                 | 0.559                                                        | 0.683                          | 5220.41            | 3565.58            | 0.382                          | 3929.17            | 1499.45            |
| A_68_P29419197 | chr14:14844919-14844966                           | NM_139227:-62     | Atxn7       | PROMOTER               | 0.474                                                        | 5.005                          | 1440.38            | 7208.47            | 2.37                           | 1286.85            | 3049.65            |
| A_68_P22411289 | chr3:108013755-108013799                          | NM_175183:76      | Atxn7l2     | INSIDE                 | 0.497                                                        | 0.337                          | 1426.68            | 480.21             | 0.167                          | 1028.36            | 172.12             |
| A_68_P22411290 | chr3:108013838-108013882                          | NM_175183:-8      | Atxn7l2     | PROMOTER               | 0.609                                                        | 4.341                          | 1785.29            | 7750.60            | 2.643                          | 1533.78            | 4053.90            |
| A_68_P22411283 | chr3:108013080-108013124                          | NM_175183:750     | Atxn7l2     | INSIDE                 | 0.488                                                        | 0.710                          | 3915.59            | 2781.00            | 0.347                          | 3033.51            | 1051.93            |
| A_68_P28078744 | chr11:102157408-102157452                         | NM_001098836:513  | Atxn7l3     | INSIDE                 | 0.482                                                        | 3.992                          | 1285.82            | 5133.28            | 1.926                          | 1098.84            | 2116.00            |
| A_68_P23244381 | chr4:118905195-118905239                          | NM_001012400:113  | AU022252    | INSIDE                 | 0.341                                                        | 7.196                          | 5963.87            | 42916.80           | 2.455                          | 4172.60            | 10245.31           |
| A_68_P32233080 | chrX:5659260-5659304                              | NM_001033211:1256 | AU022751    | INSIDE                 | 0.65                                                         | 2.950                          | 367.53             | 1084.39            | 1.918                          | 554.38             | 1063.30            |
| A_68_P32233086 | chrX:5659825-5659869                              | NM_001033211:692  | AU022751    | INSIDE                 | 0.618                                                        | 2.791                          | 432.50             | 1207.17            | 1.725                          | 710.91             | 1226.30            |
| A_68_P32233088 | chrX:5660010-5660054                              | NM_001033211:506  | AU022751    | INSIDE                 | 0.413                                                        | 1.720                          | 1959.27            | 3369.67            | 0.711                          | 2763.47            | 1965.04            |

| ProbeName      | Target position of probe on CpG island microarray | TargetID           | GeneSymbol    | CpG island Description | Ratio of relative methylation (TiO <sub>2</sub> -NP/Vehicle) | Sham group                     |                    |                    | TiO <sub>2</sub> -H group      |                    |                    |
|----------------|---------------------------------------------------|--------------------|---------------|------------------------|--------------------------------------------------------------|--------------------------------|--------------------|--------------------|--------------------------------|--------------------|--------------------|
|                |                                                   |                    |               |                        |                                                              | Relative methylation (Cy5/Cy3) | Cy3 signal (Input) | Cy5 signal (MeDIP) | Relative methylation (Cy5/Cy3) | Cy3 signal (Input) | Cy5 signal (MeDIP) |
| A_68_P27291409 | chr10:81591053-81591097                           | NM_001163064:317   | AU041133      | INSIDE                 | 0.55                                                         | 0.548                          | 1019.00            | 558.28             | 0.301                          | 836.15             | 251.90             |
| A_68_P29040998 | chr13:53024981-53025025                           | NM_016709:44       | Auh           | INSIDE                 | 0.366                                                        | 7.955                          | 16756.53           | 133292.30          | 2.914                          | 14427.42           | 42044.39           |
| A_68_P24591144 | chr6:83005100-83005144                            | NM_007517:476      | Aup1          | INSIDE                 | 0.559                                                        | 3.523                          | 1580.49            | 5568.21            | 1.97                           | 1138.06            | 2241.94            |
| A_68_P24098215 | chr5:131915714-131915758                          | NM_177047:1102477  | Auts2         | INSIDE                 | 0.053                                                        | 47.383                         | 1798.81            | 85233.36           | 2.494                          | 1475.66            | 3679.64            |
| A_68_P24104854 | chr5:133019778-133019822                          | NM_177047:-1587    | Auts2         | PROMOTER               | 0.286                                                        | 0.233                          | 3581.87            | 834.20             | 0.067                          | 2717.44            | 181.01             |
| A_68_P24098738 | chr5:132013832-132013876                          | NM_177047:1004359  | Auts2         | INSIDE                 | 0.328                                                        | 8.122                          | 2634.76            | 21398.53           | 2.664                          | 2156.11            | 5744.24            |
| A_68_P24098740 | chr5:132014030-132014074                          | NM_177047:1004161  | Auts2         | INSIDE                 | 0.448                                                        | 7.778                          | 5105.99            | 39714.78           | 3.486                          | 4330.69            | 15097.02           |
| A_68_P24098743 | chr5:132014457-132014501                          | NM_177047:1003735  | Auts2         | INSIDE                 | 0.49                                                         | 0.548                          | 1448.86            | 793.56             | 0.268                          | 1067.07            | 286.32             |
| A_68_P24104853 | chr5:133019620-133019664                          | NM_177047:-1429    | Auts2         | PROMOTER               | 0.611                                                        | 4.396                          | 1129.31            | 4964.54            | 2.685                          | 1152.24            | 3093.52            |
| A_68_P24098214 | chr5:131915626-131915670                          | NM_177047:1102565  | Auts2         | INSIDE                 | 0.399                                                        | 3.968                          | 1830.72            | 7264.80            | 1.582                          | 1339.02            | 2117.75            |
| A_68_P24476446 | chr6:56664815-56664859                            | NM_030235:-62      | Avl9          | PROMOTER               | 0.471                                                        | 6.076                          | 2611.66            | 15868.15           | 2.862                          | 2212.44            | 6331.94            |
| A_68_P27508736 | chr10:121886005-121886049                         | NM_016847:472      | Avpr1a        | INSIDE                 | 0.273                                                        | 0.279                          | 4659.60            | 1299.59            | 0.076                          | 3733.47            | 284.02             |
| A_68_P28752162 | chr12:113974838-113974882                         | NM_001024602:14476 | AW555464      | INSIDE                 | 0.129                                                        | 13.505                         | 3955.96            | 53424.11           | 1.74                           | 3086.53            | 5370.93            |
| A_68_P28752038 | chr12:113960892-113960936                         | NM_001024602:530   | AW555464      | INSIDE                 | 0.223                                                        | 8.447                          | 1419.36            | 11988.72           | 1.883                          | 1206.51            | 2272.40            |
| A_68_P28752030 | chr12:113959942-113959986                         | NM_001024602:-420  | AW555464      | PROMOTER               | 0.304                                                        | 15.851                         | 1534.21            | 24318.79           | 4.82                           | 1235.53            | 5955.18            |
| A_68_P28752186 | chr12:113977208-113977252                         | NM_001024602:16846 | AW555464      | INSIDE                 | 0.481                                                        | 9.407                          | 3623.44            | 34085.04           | 4.525                          | 2945.22            | 13326.19           |
| A_68_P28752032 | chr12:113960100-113960144                         | NM_001024602:-262  | AW555464      | PROMOTER               | 0.65                                                         | 0.659                          | 1456.27            | 959.17             | 0.428                          | 1092.33            | 467.60             |
| A_68_P31108560 | chr17:26276183-26276227                           | NM_001159598:574   | Axin1         | INSIDE                 | 0.475                                                        | 0.692                          | 7689.59            | 5319.69            | 0.329                          | 5339.05            | 1754.11            |
| A_68_P28115686 | chr11:108782547-108782591                         | NM_015732:906      | Axin2         | INSIDE                 | 0.19                                                         | 22.708                         | 1588.12            | 36062.70           | 4.319                          | 1440.30            | 6221.14            |
| A_68_P28115682 | chr11:108781991-108782035                         | NM_015732:350      | Axin2         | INSIDE                 | 0.572                                                        | 0.329                          | 3076.15            | 1011.55            | 0.188                          | 2493.80            | 469.44             |
| A_68_P28115679 | chr11:108781544-108781588                         | NM_015732:-96      | Axin2         | PROMOTER               | 0.589                                                        | 0.474                          | 2420.90            | 1148.46            | 0.279                          | 1965.85            | 548.93             |
| A_68_P26528581 | chr9:54798811-54798855                            | NM_145229:-71      | AY074887      | PROMOTER               | 0.335                                                        | 7.842                          | 478.06             | 3748.69            | 2.626                          | 431.48             | 1132.88            |
| A_68_P28182256 | chr11:119948049-119948093                         | NM_009734:71       | Azil          | INSIDE                 | 0.659                                                        | 2.833                          | 547.64             | 1551.37            | 1.868                          | 480.92             | 898.17             |
| A_68_P26864195 | chr9:117949694-117949738                          | NM_001048146:100   | Azi2          | INSIDE                 | 0.263                                                        | 46.764                         | 2173.79            | 101654.80          | 12.314                         | 1867.53            | 22996.84           |
| A_68_P30149946 | chr15:38448361-38448405                           | NM_001102458:639   | Azin1         | INSIDE                 | 0.303                                                        | 5.802                          | 3316.45            | 19241.60           | 1.759                          | 2747.51            | 4831.67            |
| A_68_P30149944 | chr15:38448175-38448219                           | NM_001102458:825   | Azin1         | INSIDE                 | 0.469                                                        | 0.421                          | 7390.78            | 3112.53            | 0.198                          | 5531.47            | 1092.93            |
| A_68_P32573854 | chrX:100810244-100810288                          | NR_028381:8827     | B230206F22Rik | INSIDE                 | 0.263                                                        | 8.885                          | 4836.62            | 42971.56           | 2.334                          | 6256.06            | 14603.13           |
| A_68_P32573868 | chrX:100812194-100812238                          | NR_028381:6877     | B230206F22Rik | INSIDE                 | 0.569                                                        | 3.742                          | 633.30             | 2369.51            | 2.128                          | 699.60             | 1488.72            |
| A_68_P25588374 | chr7:148547481-148547530                          | NR_033532:3504     | B230206H07Rik | INSIDE                 | 0.112                                                        | 1.698                          | 2490.66            | 4230.15            | 0.191                          | 1780.08            | 339.71             |
| A_68_P21073310 | chr2:25463379-25463423                            | NM_001024616:566   | B230208H17Rik | INSIDE                 | 0.352                                                        | 0.279                          | 2441.92            | 682.01             | 0.098                          | 1708.36            | 167.95             |
| A_68_P21073314 | chr2:25464001-25464045                            | NM_001024616:-56   | B230208H17Rik | PROMOTER               | 0.34                                                         | 2.067                          | 2755.66            | 5695.23            | 0.702                          | 2075.74            | 1457.82            |
| A_68_P29056514 | chr13:55794315-55794359                           | NM_181278:-148     | B230219D22Rik | PROMOTER               | 0.257                                                        | 7.240                          | 1083.20            | 7842.63            | 1.858                          | 910.41             | 1691.25            |
| A_68_P24593643 | chr6:83406064-83406108                            | NR_028382:14338    | B230319C09Rik | DOWNSTREAM             | 0.582                                                        | 3.578                          | 1660.44            | 5941.60            | 2.082                          | 1650.20            | 3436.51            |
| A_68_P24593642 | chr6:83405946-83405990                            | NR_028382:14220    | B230319C09Rik | DOWNSTREAM             | 0.482                                                        | 3.706                          | 848.42             | 3144.11            | 1.785                          | 739.71             | 1320.24            |
| A_68_P23364702 | chr4:141102564-141102608                          | NR_030695:510      | B330016D10Rik | INSIDE                 | 0.45                                                         | 9.960                          | 2237.93            | 22290.21           | 4.484                          | 1798.09            | 8063.37            |
| A_68_P22222029 | chr3:69402614-69402658                            | NM_020026:147      | B3galnt1      | INSIDE                 | 0.438                                                        | 4.547                          | 1804.13            | 8203.67            | 1.991                          | 1549.99            | 3086.55            |
| A_68_P28836396 | chr13:14046811-14046855                           | NM_178640:-108     | B3galnt2      | PROMOTER               | 0.437                                                        | 4.046                          | 1866.18            | 7551.35            | 1.77                           | 1539.98            | 2726.16            |
| A_68_P28836398 | chr13:14047085-14047129                           | NM_178640:166      | B3galnt2      | INSIDE                 | 0.478                                                        | 0.744                          | 4100.82            | 3049.56            | 0.356                          | 3099.74            | 1102.10            |
| A_68_P31151211 | chr17:34088231-34088275                           | NM_019420:181      | B3galnt4      | INSIDE                 | 0.406                                                        | 3.665                          | 3400.39            | 12461.04           | 1.488                          | 2295.72            | 3415.39            |
| A_68_P24186507 | chr5:150480724-150480768                          | NM_001081204:-85   | B3galnt1      | PROMOTER               | 0.549                                                        | 3.463                          | 580.45             | 2009.84            | 1.902                          | 475.71             | 904.69             |
| A_68_P27643051 | chr11:22759336-22759380                           | NM_016888:377      | B3gnt2        | INSIDE                 | 0.417                                                        | 0.553                          | 7344.89            | 4062.99            | 0.231                          | 5140.40            | 1185.00            |
| A_68_P27643047 | chr11:22758992-22759036                           | NM_016888:721      | B3gnt2        | INSIDE                 | 0.556                                                        | 4.321                          | 1530.01            | 6611.04            | 2.401                          | 1336.75            | 3210.03            |
| A_68_P25958365 | chr8:74217508-74217552                            | NM_028189:8169     | B3gnt3        | INSIDE                 | 0.251                                                        | 1.983                          | 2252.69            | 4468.17            | 0.497                          | 1755.56            | 872.98             |
| A_68_P25958358 | chr8:74216704-74216748                            | NM_028189:8973     | B3gnt3        | INSIDE                 | 0.525                                                        | 0.232                          | 2448.81            | 567.72             | 0.122                          | 1518.48            | 184.70             |
| A_68_P24056046 | chr5:123958494-123958538                          | NM_198611:-1952    | B3gnt4        | PROMOTER               | 0.416                                                        | 0.644                          | 3478.61            | 2240.27            | 0.268                          | 2608.74            | 699.50             |
| A_68_P25354429 | chr7:105342798-105342842                          | NM_001081167:5165  | B3gnt6        | INSIDE                 | 0.636                                                        | 4.631                          | 704.81             | 3264.21            | 2.947                          | 624.01             | 1839.03            |



| ProbeName      | Target position of probe on CpG island microarray | TargetID           | GeneSymbol    | CpG island Description | Ratio of relative methylation (TiO <sub>2</sub> -NP/Vehicle) | Sham group                     |                    |                    | TiO <sub>2</sub> -H group      |                    |                    |
|----------------|---------------------------------------------------|--------------------|---------------|------------------------|--------------------------------------------------------------|--------------------------------|--------------------|--------------------|--------------------------------|--------------------|--------------------|
|                |                                                   |                    |               |                        |                                                              | Relative methylation (Cy5/Cy3) | Cy3 signal (Input) | Cy5 signal (MeDIP) | Relative methylation (Cy5/Cy3) | Cy3 signal (Input) | Cy5 signal (MeDIP) |
| A_68_P26132519 | chr8:107778394-107778438                          | NM_178879:635      | B3gnt9-ps     | INSIDE                 | 0.386                                                        | 4.725                          | 1789.06            | 8452.92            | 1.824                          | 1626.54            | 2966.77            |
| A_68_P26132522 | chr8:107778665-107778709                          | NM_178879:365      | B3gnt9-ps     | INSIDE                 | 0.637                                                        | 0.430                          | 1449.09            | 622.79             | 0.274                          | 976.80             | 267.36             |
| A_68_P28191921 | chr11:121534336-121534380                         | NM_178664:107      | B3gnt11       | INSIDE                 | 0.508                                                        | 3.595                          | 857.20             | 3081.41            | 1.825                          | 780.56             | 1424.43            |
| A_68_P31791364 | chr18:67503647-67503691                           | NR_033214:89       | B430212C06Rik | INSIDE                 | 0.398                                                        | 0.392                          | 4897.33            | 1917.84            | 0.156                          | 3679.70            | 573.74             |
| A_68_P27534363 | chr10:126607918-126607962                         | NM_027739:5054     | B4galnt1      | INSIDE                 | 0.347                                                        | 0.546                          | 2803.69            | 1531.60            | 0.19                           | 2102.15            | 398.72             |
| A_68_P27534326 | chr10:126603018-126603062                         | NM_027739:154      | B4galnt1      | INSIDE                 | 0.653                                                        | 3.690                          | 1179.91            | 4353.36            | 2.409                          | 965.39             | 2325.89            |
| A_68_P28041452 | chr11:95775809-95775854                           | NM_008081:354      | B4galnt2      | INSIDE                 | 0.25                                                         | 15.725                         | 3675.93            | 57804.53           | 3.927                          | 3139.59            | 12327.96           |
| A_68_P28041223 | chr11:95720113-95720157                           | NM_008081:56051    | B4galnt2      | DOWNSTREAM             | 0.39                                                         | 0.352                          | 3438.00            | 1210.91            | 0.137                          | 2486.33            | 341.67             |
| A_68_P24797816 | chr6:120244799-120244843                          | NM_198884:-243     | B4galnt3      | PROMOTER               | 0.331                                                        | 10.373                         | 3441.37            | 35696.48           | 3.429                          | 2922.85            | 10023.60           |
| A_68_P24797811 | chr6:120244232-120244276                          | NM_198884:323      | B4galnt3      | INSIDE                 | 0.408                                                        | 5.565                          | 1204.19            | 6700.83            | 2.269                          | 1158.73            | 2628.79            |
| A_68_P24797812 | chr6:120244301-120244345                          | NM_198884:255      | B4galnt3      | INSIDE                 | 0.637                                                        | 2.307                          | 1710.28            | 3946.33            | 1.469                          | 1524.83            | 2239.57            |
| A_68_P25586433 | chr7:148246489-148246533                          | NM_177897:-662     | B4galnt4      | PROMOTER               | 0.464                                                        | 0.294                          | 2169.18            | 637.08             | 0.136                          | 1447.49            | 197.26             |
| A_68_P25586434 | chr7:148246645-148246689                          | NM_177897:-506     | B4galnt4      | PROMOTER               | 0.66                                                         | 0.423                          | 4576.17            | 1935.85            | 0.279                          | 3017.65            | 842.56             |
| A_68_P22859202 | chr4:40801217-40801261                            | NM_022305:-207     | B4galnt1      | PROMOTER               | 0.502                                                        | 0.297                          | 5386.87            | 1602.54            | 0.149                          | 4142.84            | 618.66             |
| A_68_P23237029 | chr4:117555567-117555611                          | NM_017377:486      | B4galnt2      | INSIDE                 | 0.521                                                        | 0.461                          | 6366.69            | 2932.99            | 0.24                           | 4407.64            | 1058.21            |
| A_68_P20827009 | chr1:173200884-173200928                          | NM_020579:448      | B4galnt3      | INSIDE                 | 0.276                                                        | 18.115                         | 1332.32            | 24135.45           | 4.999                          | 1193.33            | 5965.06            |
| A_68_P21835089 | chr2:167174904-167174948                          | NM_019835:-248     | B4galnt5      | PROMOTER               | 0.376                                                        | 0.571                          | 7525.16            | 4296.28            | 0.215                          | 5119.97            | 1100.25            |
| A_68_P21835090 | chr2:167174992-167175036                          | NM_019835:-336     | B4galnt5      | PROMOTER               | 0.383                                                        | 0.675                          | 7817.65            | 5277.49            | 0.258                          | 5726.91            | 1480.14            |
| A_68_P24248435 | chr6:13627675-13627719                            | NM_175312:270      | B630005N14Rik | INSIDE                 | 0.295                                                        | 0.279                          | 3590.64            | 1002.97            | 0.083                          | 2590.80            | 213.76             |
| A_68_P24248434 | chr6:13627597-13627641                            | NM_175312:348      | B630005N14Rik | INSIDE                 | 0.427                                                        | 1.418                          | 1280.71            | 1816.45            | 0.605                          | 1148.24            | 695.23             |
| A_68_P23440042 | chr4:155069270-155069314                          | NM_178699:842      | B930041F14Rik | INSIDE                 | 0.369                                                        | 4.918                          | 2841.18            | 13971.86           | 1.815                          | 2384.11            | 4328.15            |
| A_68_P23440041 | chr4:155069180-155069224                          | NM_178699:752      | B930041F14Rik | INSIDE                 | 0.384                                                        | 0.494                          | 2258.73            | 1116.25            | 0.19                           | 1712.90            | 324.66             |
| A_68_P24142834 | chr5:141180937-141180981                          | NM_172724:-18      | Baat1         | DIVERGENT_PROMOTER     | 0.118                                                        | 12.856                         | 2479.60            | 31877.21           | 1.513                          | 1798.32            | 2720.70            |
| A_68_P26476278 | chr9:45646743-45646787                            | NM_001145947:153   | Bace1         | INSIDE                 | 0.57                                                         | 0.567                          | 1682.00            | 953.36             | 0.323                          | 1427.69            | 461.35             |
| A_68_P26476280 | chr9:45646906-45646950                            | NM_001145947:317   | Bace1         | INSIDE                 | 0.616                                                        | 0.646                          | 1611.21            | 1041.16            | 0.398                          | 1266.32            | 504.31             |
| A_68_P30941181 | chr16:87699207-87699251                           | NM_007520:30       | Bach1         | INSIDE                 | 0.288                                                        | 1.794                          | 5475.73            | 9825.50            | 0.517                          | 4360.77            | 2253.25            |
| A_68_P31157816 | chr17:35272577-35272621                           | NM_057171:412      | Bag6          | INSIDE                 | 0.159                                                        | 0.316                          | 4832.78            | 1526.57            | 0.05                           | 3439.58            | 172.36             |
| A_68_P28183249 | chr11:120098316-120098360                         | NM_198423:4078     | Bahcc1        | INSIDE                 | 0.376                                                        | 8.051                          | 2146.83            | 17283.80           | 3.029                          | 1723.72            | 5221.30            |
| A_68_P28183194 | chr11:120092271-120092315                         | NM_198423:-1968    | Bahcc1        | PROMOTER               | 0.44                                                         | 0.618                          | 914.35             | 565.02             | 0.272                          | 701.63             | 190.59             |
| A_68_P21566912 | chr2:118741928-118741972                          | NM_001045523:14600 | Bahd1         | INSIDE                 | 0.369                                                        | 5.952                          | 1242.71            | 7396.80            | 2.199                          | 1010.32            | 2221.34            |
| A_68_P21566791 | chr2:118727169-118727213                          | NM_001045523:-160  | Bahd1         | PROMOTER               | 0.526                                                        | 0.652                          | 1388.35            | 904.84             | 0.343                          | 1196.72            | 410.49             |
| A_68_P21566798 | chr2:118728254-118728298                          | NM_001045523:926   | Bahd1         | INSIDE                 | 0.38                                                         | 0.687                          | 1871.96            | 1286.50            | 0.261                          | 1488.35            | 388.97             |
| A_68_P30337605 | chr15:74348245-74348289                           | NM_174991:1641     | Bai1          | INSIDE                 | 0.096                                                        | 47.138                         | 2003.47            | 94440.34           | 4.547                          | 2102.70            | 9560.64            |
| A_68_P30337697 | chr15:74359726-74359770                           | NM_174991:13123    | Bai1          | INSIDE                 | 0.161                                                        | 2.984                          | 3326.11            | 9924.09            | 0.481                          | 2190.32            | 1054.44            |
| A_68_P30337621 | chr15:74350207-74350251                           | NM_174991:3603     | Bai1          | INSIDE                 | 0.363                                                        | 5.312                          | 2160.73            | 11477.17           | 1.931                          | 1727.88            | 3336.15            |
| A_68_P30337599 | chr15:74347574-74347618                           | NM_174991:971      | Bai1          | INSIDE                 | 0.408                                                        | 14.366                         | 1210.44            | 17388.55           | 5.868                          | 1345.16            | 7893.11            |
| A_68_P23299543 | chr4:129665364-129665408                          | NM_001199696:3065  | Bai2          | INSIDE                 | 0.201                                                        | 16.546                         | 1146.20            | 18964.52           | 3.327                          | 912.49             | 3035.51            |
| A_68_P23299524 | chr4:129662900-129662944                          | NM_001199696:601   | Bai2          | INSIDE                 | 0.229                                                        | 2.112                          | 3782.21            | 7986.49            | 0.483                          | 2735.90            | 1321.87            |
| A_68_P23299678 | chr4:129683985-129684029                          | NM_001199696:21685 | Bai2          | INSIDE                 | 0.441                                                        | 4.701                          | 883.37             | 4152.92            | 2.076                          | 835.80             | 1734.75            |
| A_68_P23299541 | chr4:129665133-129665177                          | NM_001199696:2833  | Bai2          | INSIDE                 | 0.462                                                        | 0.395                          | 1221.95            | 482.43             | 0.183                          | 954.94             | 174.32             |
| A_68_P23299525 | chr4:129662999-129663043                          | NM_001199696:699   | Bai2          | INSIDE                 | 0.173                                                        | 1.368                          | 4831.16            | 6609.35            | 0.236                          | 3075.09            | 725.81             |
| A_68_P20101394 | chr1:25886869-25886913                            | NM_175642:-338     | Bai3          | PROMOTER               | 0.579                                                        | 9.219                          | 3037.88            | 28004.96           | 5.337                          | 2758.94            | 14725.10           |
| A_68_P28181194 | chr11:119804412-119804456                         | NM_001037754:29    | Baiap2        | INSIDE                 | 0.649                                                        | 0.193                          | 2727.17            | 525.72             | 0.125                          | 1778.57            | 222.65             |
| A_68_P24160788 | chr5:145119007-145119051                          | NM_025833:-47      | Baiap2l1      | PROMOTER               | 0.301                                                        | 6.624                          | 3113.70            | 20624.33           | 1.995                          | 2966.50            | 5918.73            |
| A_68_P24160783 | chr5:145118513-145118557                          | NM_025833:447      | Baiap2l1      | INSIDE                 | 0.646                                                        | 0.504                          | 2487.14            | 1254.62            | 0.326                          | 1963.71            | 640.34             |
| A_68_P30365368 | chr15:79091566-79091610                           | NM_177580:24351    | Baiap2l2      | INSIDE                 | 0.498                                                        | 0.421                          | 2746.62            | 1157.54            | 0.21                           | 2070.93            | 434.62             |

| ProbeName      | Target position of probe on CpG island microarray | TargetID          | GeneSymbol | CpG island Description | Ratio of relative methylation (TiO <sub>2</sub> -NP/Vehicle) | Sham group                     |                    |                    | TiO <sub>2</sub> -H group      |                    |                    |
|----------------|---------------------------------------------------|-------------------|------------|------------------------|--------------------------------------------------------------|--------------------------------|--------------------|--------------------|--------------------------------|--------------------|--------------------|
|                |                                                   |                   |            |                        |                                                              | Relative methylation (Cy5/Cy3) | Cy3 signal (Input) | Cy5 signal (MeDIP) | Relative methylation (Cy5/Cy3) | Cy3 signal (Input) | Cy5 signal (MeDIP) |
| A_68_P30365376 | chr15:79092452-79092496                           | NM_177580:23465   | Baiap212   | INSIDE                 | 0.618                                                        | 2.890                          | 590.12             | 1705.23            | 1.784                          | 524.32             | 935.57             |
| A_68_P31458868 | chr18:3507176-3507220                             | NM_026505:-756    | Bambi      | PROMOTER               | 0.131                                                        | 2.625                          | 1554.33            | 4080.60            | 0.345                          | 1188.74            | 410.25             |
| A_68_P31458876 | chr18:3507944-3507988                             | NM_026505:12      | Bambi      | INSIDE                 | 0.512                                                        | 0.137                          | 3694.06            | 507.34             | 0.07                           | 2437.79            | 171.57             |
| A_68_P21586516 | chr2:122293842-122293886                          | NR_027919:-331    | Bambi-ps1  | PROMOTER               | 0.616                                                        | 0.403                          | 1665.19            | 670.79             | 0.248                          | 1206.52            | 299.55             |
| A_68_P21586514 | chr2:122293633-122293677                          | NR_027919:-121    | Bambi-ps1  | PROMOTER               | 0.659                                                        | 0.383                          | 1581.38            | 605.90             | 0.253                          | 1257.45            | 317.65             |
| A_68_P31928281 | chr19:5366247-5366291                             | NM_001038231:79   | Banf1      | INSIDE                 | 0.611                                                        | 0.367                          | 1618.80            | 593.77             | 0.224                          | 1163.24            | 260.83             |
| A_68_P31928282 | chr19:5366321-5366365                             | NM_001038231:5    | Banf1      | INSIDE                 | 0.513                                                        | 1.413                          | 3688.44            | 5210.79            | 0.724                          | 2839.98            | 2056.72            |
| A_68_P26229920 | chr8:124474514-124474558                          | NM_001110100:104  | Banp       | INSIDE                 | 0.642                                                        | 0.641                          | 6585.00            | 4219.47            | 0.411                          | 3923.30            | 1612.75            |
| A_68_P26229918 | chr8:124474275-124474319                          | NM_001110100:-136 | Banp       | DIVERGENT_PROMOTER     | 0.331                                                        | 0.629                          | 1082.70            | 681.23             | 0.209                          | 829.53             | 173.01             |
| A_68_P21094081 | chr2:28764046-28764090                            | NM_019446:7873    | Barhl1     | INSIDE                 | 0.341                                                        | 5.030                          | 1899.13            | 9552.90            | 1.718                          | 1677.44            | 2881.46            |
| A_68_P23961301 | chr5:106881112-106881156                          | NM_001005477:6051 | Barhl2     | DOWNSTREAM             | 0.317                                                        | 10.481                         | 1141.24            | 11960.84           | 3.326                          | 1013.40            | 3370.77            |
| A_68_P23961359 | chr5:106887678-106887722                          | NM_001005477:-515 | Barhl2     | PROMOTER               | 0.549                                                        | 4.070                          | 658.87             | 2681.29            | 2.233                          | 566.58             | 1265.21            |
| A_68_P29020699 | chr13:48761332-48761376                           | NM_007526:2950    | Barx1      | INSIDE                 | 0.492                                                        | 0.585                          | 1442.31            | 843.15             | 0.288                          | 1109.97            | 319.16             |
| A_68_P25093323 | chr7:52721977-52722021                            | NM_007527:270     | Bax        | INSIDE                 | 0.225                                                        | 1.768                          | 1770.41            | 3130.19            | 0.398                          | 1353.83            | 538.60             |
| A_68_P24115158 | chr5:135663906-135663950                          | NM_011714:736     | Baz1b      | INSIDE                 | 0.286                                                        | 11.518                         | 853.11             | 9826.18            | 3.296                          | 792.83             | 2612.83            |
| A_68_P27539535 | chr10:127533910-127533954                         | NM_054078:4094    | Baz2a      | INSIDE                 | 0.499                                                        | 3.485                          | 1854.08            | 6461.95            | 1.74                           | 1586.16            | 2759.32            |
| A_68_P27539503 | chr10:127530080-127530124                         | NM_054078:264     | Baz2a      | INSIDE                 | 0.435                                                        | 1.636                          | 3769.42            | 6167.96            | 0.711                          | 2827.87            | 2011.40            |
| A_68_P24330588 | chr6:30124352-30124396                            | NR_038124:-2248   | BB283400   | DIVERGENT_PROMOTER     | 0.34                                                         | 8.759                          | 1147.56            | 10051.93           | 2.982                          | 1030.24            | 3071.70            |
| A_68_P24330580 | chr6:30123352-30123396                            | NR_038124:-3248   | BB283400   | DIVERGENT_PROMOTER     | 0.623                                                        | 0.457                          | 5725.42            | 2616.50            | 0.285                          | 3971.11            | 1130.45            |
| A_68_P24980722 | chr7:16885176-16885220                            | NM_133234:-9733   | Bbc3       | PROMOTER               | 0.585                                                        | 3.186                          | 1203.87            | 3835.59            | 1.863                          | 1080.46            | 2012.68            |
| A_68_P24980760 | chr7:16895312-16895356                            | NM_133234:403     | Bbc3       | INSIDE                 | 0.638                                                        | 0.677                          | 857.59             | 580.96             | 0.432                          | 687.40             | 297.16             |
| A_68_P27448186 | chr10:110735503-110735547                         | NM_027914:-210    | Bbs10      | PROMOTER               | 0.224                                                        | 18.234                         | 5712.67            | 104165.90          | 4.078                          | 4889.54            | 19938.80           |
| A_68_P22062861 | chr3:37211563-37211607                            | NM_001008502:109  | Bbs12      | INSIDE                 | 0.642                                                        | 0.595                          | 1960.97            | 1166.48            | 0.382                          | 1486.54            | 567.84             |
| A_68_P26352023 | chr9:22280042-22280086                            | NM_178415:-94     | Bbs9       | DIVERGENT_PROMOTER     | 0.624                                                        | 0.681                          | 2530.15            | 1722.45            | 0.425                          | 1873.38            | 795.39             |
| A_68_P30751459 | chr16:50431707-50431751                           | NM_027444:774     | Bbx        | INSIDE                 | 0.353                                                        | 1.669                          | 13305.32           | 22200.19           | 0.589                          | 9735.22            | 5733.29            |
| A_68_P30751458 | chr16:50431622-50431666                           | NM_027444:858     | Bbx        | INSIDE                 | 0.398                                                        | 0.433                          | 3913.34            | 1694.46            | 0.172                          | 2500.58            | 431.19             |
| A_68_P30751460 | chr16:50431806-50431850                           | NM_027444:674     | Bbx        | INSIDE                 | 0.154                                                        | 1.450                          | 1166.36            | 1691.38            | 0.223                          | 947.70             | 211.15             |
| A_68_P31126996 | chr17:29406043-29406087                           | NM_030561:332     | BC004004   | INSIDE                 | 0.299                                                        | 9.927                          | 2296.05            | 22793.79           | 2.967                          | 2090.43            | 6203.03            |
| A_68_P31126995 | chr17:29405863-29405907                           | NM_030561:152     | BC004004   | INSIDE                 | 0.509                                                        | 6.144                          | 1422.49            | 8739.87            | 3.125                          | 1276.52            | 3989.19            |
| A_68_P28889015 | chr13:24892904-24892948                           | NM_024473:-599    | BC005537   | PROMOTER               | 0.316                                                        | 9.239                          | 600.96             | 5552.50            | 2.92                           | 551.49             | 1610.62            |
| A_68_P23952640 | chr5:104937435-104937479                          | NM_001166581:86   | BC005561   | INSIDE                 | 0.462                                                        | 7.302                          | 1100.67            | 8037.16            | 3.375                          | 935.05             | 3155.77            |
| A_68_P27279428 | chr10:79337495-79337539                           | NM_001170935:-137 | BC005764   | DIVERGENT_PROMOTER     | 0.167                                                        | 10.671                         | 1824.69            | 19471.38           | 1.78                           | 1361.15            | 2422.87            |
| A_68_P26920734 | chr10:7500514-7500558                             | NM_145418:179     | BC013529   | INSIDE                 | 0.654                                                        | 2.950                          | 1068.10            | 3151.26            | 1.93                           | 918.84             | 1773.07            |
| A_68_P28788966 | chr13:3610442-3610486                             | NM_134063:-110    | BC016423   | PROMOTER               | 0.387                                                        | 4.172                          | 1517.18            | 6329.77            | 1.613                          | 1307.22            | 2108.51            |
| A_68_P26349677 | chr9:21748879-21748923                            | NM_144935:6183    | BC018242   | INSIDE                 | 0.414                                                        | 5.604                          | 3548.85            | 19889.42           | 2.319                          | 2877.10            | 6671.03            |
| A_68_P26349635 | chr9:21741759-21741803                            | NM_144935:-937    | BC018242   | PROMOTER               | 0.424                                                        | 6.287                          | 886.18             | 5571.76            | 2.669                          | 737.22             | 1967.39            |
| A_68_P26349688 | chr9:21751953-21751997                            | NM_144935:9257    | BC018242   | INSIDE                 | 0.577                                                        | 0.224                          | 2530.04            | 567.63             | 0.129                          | 1844.13            | 238.55             |
| A_68_P26254623 | chr8:128434312-128434356                          | NM_145608:-15     | BC021891   | PROMOTER               | 0.56                                                         | 0.576                          | 5297.42            | 3052.78            | 0.323                          | 3959.48            | 1277.29            |
| A_68_P28078449 | chr11:102110124-102110173                         | NM_153544:-47     | BC030867   | PROMOTER               | 0.276                                                        | 0.550                          | 1595.41            | 877.25             | 0.152                          | 1163.30            | 176.49             |
| A_68_P30684012 | chr16:38089843-38089887                           | NR_033221:-518    | BC031361   | PROMOTER               | 0.481                                                        | 0.454                          | 1706.41            | 773.93             | 0.218                          | 1467.05            | 319.75             |
| A_68_P20878150 | chr1:182781418-182781462                          | NM_145943:159     | BC031781   | INSIDE                 | 0.166                                                        | 2.545                          | 2493.46            | 6344.99            | 0.421                          | 1845.73            | 777.95             |
| A_68_P29977216 | chr15:3977197-3977241                             | NR_028266:188     | BC037032   | INSIDE                 | 0.622                                                        | 2.745                          | 1179.63            | 3237.95            | 1.708                          | 838.75             | 1432.27            |
| A_68_P24129540 | chr5:138705221-138705265                          | NM_153161:38      | BC037034   | INSIDE                 | 0.194                                                        | 2.184                          | 2632.16            | 5748.44            | 0.424                          | 2009.43            | 851.32             |
| A_68_P24129534 | chr5:138704628-138704672                          | NM_153161:630     | BC037034   | INSIDE                 | 0.573                                                        | 0.720                          | 1722.67            | 1240.12            | 0.412                          | 1403.80            | 579.03             |
| A_68_P27855080 | chr11:62461500-62461544                           | NM_198861:503     | BC046404   | INSIDE                 | 0.564                                                        | 2.623                          | 2974.03            | 7801.82            | 1.479                          | 2314.89            | 3424.24            |
| A_68_P26229677 | chr8:124431978-124432022                          | NM_001033485:268  | BC048644   | INSIDE                 | 0.595                                                        | 2.381                          | 3435.13            | 8178.74            | 1.417                          | 2614.98            | 3705.90            |

| ProbeName      | Target position of probe on CpG island microarray | TargetID           | GeneSymbol | CpG island Description | Ratio of relative methylation (TiO <sub>2</sub> -NP/Vehicle) | Sham group                     |                    |                    | TiO <sub>2</sub> -H group      |                    |                    |
|----------------|---------------------------------------------------|--------------------|------------|------------------------|--------------------------------------------------------------|--------------------------------|--------------------|--------------------|--------------------------------|--------------------|--------------------|
|                |                                                   |                    |            |                        |                                                              | Relative methylation (Cy5/Cy3) | Cy3 signal (Input) | Cy5 signal (MeDIP) | Relative methylation (Cy5/Cy3) | Cy3 signal (Input) | Cy5 signal (MeDIP) |
| A_68_P20786425 | chr1:165924761-165924805                          | NM_201364:130      | BC055324   | INSIDE                 | 0.589                                                        | 0.586                          | 5433.68            | 3183.44            | 0.345                          | 4209.85            | 1451.64            |
| A_68_P24004993 | chr5:115061259-115061303                          | NM_001004180:43021 | BC057022   | INSIDE                 | 0.207                                                        | 17.166                         | 8497.55            | 145868.80          | 3.552                          | 6800.73            | 24159.49           |
| A_68_P24004683 | chr5:115017800-115017844                          | NM_001004180:-437  | BC057022   | PROMOTER               | 0.382                                                        | 45.298                         | 2343.61            | 106160.80          | 17.302                         | 2205.05            | 38152.67           |
| A_68_P24004989 | chr5:115060757-115060801                          | NM_001004180:42519 | BC057022   | INSIDE                 | 0.387                                                        | 11.454                         | 4400.32            | 50402.32           | 4.433                          | 3457.77            | 15329.18           |
| A_68_P24004682 | chr5:115017652-115017696                          | NM_001004180:-585  | BC057022   | PROMOTER               | 0.447                                                        | 4.681                          | 1668.42            | 7810.12            | 2.094                          | 1552.51            | 3250.28            |
| A_68_P24004680 | chr5:115017431-115017475                          | NM_001004180:-807  | BC057022   | PROMOTER               | 0.594                                                        | 27.753                         | 917.29             | 25457.41           | 16.485                         | 1065.24            | 17560.68           |
| A_68_P24004688 | chr5:115018396-115018440                          | NM_001004180:159   | BC057022   | INSIDE                 | 0.434                                                        | 0.581                          | 1063.24            | 617.67             | 0.252                          | 862.58             | 217.47             |
| A_68_P21040965 | chr2:18620391-18620435                            | NM_001001334:-236  | BC061194   | PROMOTER               | 0.598                                                        | 0.436                          | 1162.88            | 507.06             | 0.261                          | 881.74             | 229.98             |
| A_68_P21040894 | chr2:18612064-18612108                            | NM_001001334:-8562 | BC061194   | PROMOTER               | 0.505                                                        | 0.568                          | 973.07             | 552.84             | 0.287                          | 783.07             | 224.81             |
| A_68_P21040929 | chr2:18616201-18616245                            | NM_001001334:-4426 | BC061194   | PROMOTER               | 0.294                                                        | 2.097                          | 1992.00            | 4177.18            | 0.618                          | 1879.49            | 1160.62            |
| A_68_P21040925 | chr2:18615733-18615777                            | NM_001001334:-4894 | BC061194   | PROMOTER               | 0.585                                                        | 0.655                          | 791.35             | 518.40             | 0.383                          | 726.06             | 278.12             |
| A_68_P25616602 | chr8:4217183-4217227                              | NM_207203:108      | BC068157   | INSIDE                 | 0.09                                                         | 27.187                         | 1383.92            | 37625.26           | 2.448                          | 960.61             | 2351.82            |
| A_68_P25616526 | chr8:4206417-4206461                              | NM_207203:10874    | BC068157   | DOWNSTREAM             | 0.107                                                        | 0.517                          | 4418.94            | 2285.29            | 0.056                          | 3158.05            | 175.30             |
| A_68_P25616600 | chr8:4217027-4217071                              | NM_207203:264      | BC068157   | INSIDE                 | 0.305                                                        | 1.690                          | 4184.56            | 7069.86            | 0.516                          | 2991.29            | 1542.28            |
| A_68_P28332409 | chr12:32319733-32319777                           | NM_001164090:-231  | Bcap29     | PROMOTER               | 0.391                                                        | 26.608                         | 1444.34            | 38430.43           | 10.392                         | 1773.12            | 18426.19           |
| A_68_P32464342 | chrX:70961468-70961512                            | NM_012060:24       | Bcap31     | INSIDE                 | 0.331                                                        | 11.268                         | 2852.47            | 32140.45           | 3.733                          | 3439.07            | 12838.77           |
| A_68_P24920738 | chr6:144997199-144997243                          | NM_001024468:112   | Bcat1      | INSIDE                 | 0.571                                                        | 3.966                          | 1581.79            | 6272.61            | 2.265                          | 1227.79            | 2780.79            |
| A_68_P25093839 | chr7:52825720-52825764                            | NM_009737:10       | Bcat2      | INSIDE                 | 0.509                                                        | 4.302                          | 2320.71            | 9983.62            | 2.189                          | 1819.47            | 3982.95            |
| A_68_P27649728 | chr11:24064796-24064840                           | NM_001159290:84124 | Bell1a     | INSIDE                 | 0.467                                                        | 5.885                          | 1658.22            | 9759.19            | 2.746                          | 1480.73            | 4065.72            |
| A_68_P27649064 | chr11:23977567-23977611                           | NM_001159289:-467  | Bell1a     | PROMOTER               | 0.4                                                          | 1.469                          | 1498.92            | 2201.68            | 0.587                          | 1228.38            | 720.92             |
| A_68_P28724526 | chr12:109155259-109155303                         | NM_001079883:86344 | Bell1b     | INSIDE                 | 0.134                                                        | 13.541                         | 2208.09            | 29900.34           | 1.815                          | 1777.60            | 3225.74            |
| A_68_P28725240 | chr12:109244557-109244601                         | NM_001079883:-2954 | Bell1b     | PROMOTER               | 0.304                                                        | 28.894                         | 5702.32            | 164761.20          | 8.785                          | 6556.95            | 57602.73           |
| A_68_P28724517 | chr12:109154270-109154314                         | NM_001079883:87332 | Bell1b     | INSIDE                 | 0.314                                                        | 13.740                         | 1800.36            | 24737.78           | 4.317                          | 2096.68            | 9050.86            |
| A_68_P28724523 | chr12:109154940-109154984                         | NM_001079883:86662 | Bell1b     | INSIDE                 | 0.525                                                        | 4.499                          | 818.88             | 3683.88            | 2.362                          | 565.53             | 1335.84            |
| A_68_P28725239 | chr12:109244424-109244468                         | NM_001079883:-2822 | Bell1b     | PROMOTER               | 0.545                                                        | 2.697                          | 1819.66            | 4906.91            | 1.471                          | 1638.22            | 2409.29            |
| A_68_P21617370 | chr2:127952278-127952322                          | NM_009754:527      | Bcl2l11    | INSIDE                 | 0.463                                                        | 0.506                          | 1402.23            | 709.89             | 0.235                          | 1098.17            | 257.62             |
| A_68_P24800508 | chr6:120786336-120786380                          | NM_153516:111      | Bcl2l13    | INSIDE                 | 0.341                                                        | 5.241                          | 2490.94            | 13054.25           | 1.789                          | 2069.09            | 3700.66            |
| A_68_P24995433 | chr7:20408093-20408137                            | NM_033601:-10      | Bcl3       | PROMOTER               | 0.272                                                        | 16.986                         | 695.91             | 11821.05           | 4.626                          | 652.18             | 3016.90            |
| A_68_P30605892 | chr16:23988103-23988147                           | NM_009744:574      | Bcl6       | INSIDE                 | 0.236                                                        | 21.348                         | 3670.89            | 78365.26           | 5.04                           | 3016.10            | 15201.24           |
| A_68_P30605853 | chr16:23983382-23983426                           | NM_009744:5294     | Bcl6       | INSIDE                 | 0.422                                                        | 0.311                          | 1623.22            | 505.31             | 0.131                          | 1346.95            | 176.79             |
| A_68_P30605897 | chr16:23988863-23988907                           | NM_009744:-186     | Bcl6       | PROMOTER               | 0.436                                                        | 42.875                         | 1831.15            | 78511.02           | 18.687                         | 1536.40            | 28711.02           |
| A_68_P30605889 | chr16:23987593-23987637                           | NM_009744:1084     | Bcl6       | INSIDE                 | 0.338                                                        | 1.519                          | 1717.62            | 2609.25            | 0.513                          | 1537.60            | 788.95             |
| A_68_P27899598 | chr11:70044019-70044063                           | NM_007528:-740     | Bcl6b      | DIVERGENT_PROMOTER     | 0.543                                                        | 4.648                          | 787.91             | 3662.15            | 2.526                          | 717.00             | 1810.86            |
| A_68_P27899584 | chr11:70042574-70042618                           | NM_007528:704      | Bcl6b      | INSIDE                 | 0.599                                                        | 4.872                          | 729.74             | 3555.37            | 2.919                          | 597.46             | 1744.27            |
| A_68_P24055180 | chr5:123794132-123794176                          | NM_029850:-302     | Bcl7a      | PROMOTER               | 0.444                                                        | 0.220                          | 2835.30            | 622.39             | 0.097                          | 1776.89            | 173.20             |
| A_68_P24055363 | chr5:123823490-123823534                          | NM_029850:29056    | Bcl7a      | INSIDE                 | 0.641                                                        | 2.601                          | 2208.81            | 5745.64            | 1.666                          | 1665.99            | 2776.07            |
| A_68_P24115047 | chr5:135644102-135644146                          | NM_009745:-117     | Bcl7b      | PROMOTER               | 0.436                                                        | 0.655                          | 1317.75            | 862.62             | 0.286                          | 1106.90            | 316.09             |
| A_68_P32260338 | chrX:11664552-11664596                            | NM_029510:-6895    | Bcor       | PROMOTER               | 0.175                                                        | 13.702                         | 507.47             | 6953.55            | 2.404                          | 529.83             | 1273.56            |
| A_68_P32260801 | chrX:11735963-11736007                            | NM_001168321:1497  | Bcor       | INSIDE                 | 0.176                                                        | 28.192                         | 1961.49            | 55299.04           | 4.949                          | 1995.26            | 9873.84            |
| A_68_P32260816 | chrX:11737647-11737691                            | NM_001168321:-187  | Bcor       | PROMOTER               | 0.448                                                        | 5.502                          | 660.68             | 3635.00            | 2.465                          | 830.62             | 2047.59            |
| A_68_P32260573 | chrX:11705501-11705545                            | NM_001168321:31959 | Bcor       | INSIDE                 | 0.488                                                        | 0.442                          | 1320.68            | 583.76             | 0.216                          | 1891.81            | 407.78             |
| A_68_P32260334 | chrX:11664151-11664195                            | NM_029510:-6493    | Bcor       | PROMOTER               | 0.452                                                        | 3.857                          | 1168.79            | 4508.01            | 1.745                          | 1374.15            | 2397.73            |
| A_68_P32260282 | chrX:11658399-11658443                            | NM_029510:-741     | Bcor       | PROMOTER               | 0.159                                                        | 3.929                          | 1806.73            | 7097.83            | 0.623                          | 1930.96            | 1202.52            |
| A_68_P32260673 | chrX:11717563-11717607                            | NM_001168321:19897 | Bcor       | INSIDE                 | 0.273                                                        | 6.471                          | 668.30             | 4324.32            | 1.764                          | 759.70             | 1340.06            |
| A_68_P32260345 | chrX:11665362-11665406                            | NM_029510:-7705    | Bcor       | PROMOTER               | 0.101                                                        | 2.884                          | 456.62             | 1316.67            | 0.292                          | 587.60             | 171.59             |
| A_68_P32260274 | chrX:11657268-11657312                            | NM_029510:389      | Bcor       | INSIDE                 | 0.387                                                        | 1.843                          | 2820.62            | 5198.17            | 0.712                          | 3971.48            | 2829.17            |

| ProbeName      | Target position of probe on CpG island microarray | TargetID           | GeneSymbol | CpG island Description | Ratio of relative methylation (TiO <sub>2</sub> -NP/Vehicle) | Sham group                     |                    |                    | TiO <sub>2</sub> -H group      |                    |                    |
|----------------|---------------------------------------------------|--------------------|------------|------------------------|--------------------------------------------------------------|--------------------------------|--------------------|--------------------|--------------------------------|--------------------|--------------------|
|                |                                                   |                    |            |                        |                                                              | Relative methylation (Cy5/Cy3) | Cy3 signal (Input) | Cy5 signal (MeDIP) | Relative methylation (Cy5/Cy3) | Cy3 signal (Input) | Cy5 signal (MeDIP) |
| A_68_P32260336 | chrX:11664364-11664408                            | NM_029510:-6707    | Bcor       | PROMOTER               | 0.643                                                        | 3.485                          | 228.43             | 796.04             | 2.241                          | 339.15             | 760.05             |
| A_68_P32364032 | chrX:45694726-45694770                            | NM_178782:214      | Bcor11     | INSIDE                 | 0.237                                                        | 11.350                         | 1391.46            | 15792.98           | 2.695                          | 1560.83            | 4206.16            |
| A_68_P32364027 | chrX:45694166-45694210                            | NM_178782:-346     | Bcor11     | PROMOTER               | 0.364                                                        | 11.085                         | 928.86             | 10296.44           | 4.032                          | 1026.72            | 4140.07            |
| A_68_P32364064 | chrX:45698666-45698710                            | NM_178782:4154     | Bcor11     | INSIDE                 | 0.413                                                        | 4.328                          | 1122.12            | 4856.24            | 1.788                          | 1687.75            | 3016.92            |
| A_68_P32364063 | chrX:45698568-45698612                            | NM_178782:4056     | Bcor11     | INSIDE                 | 0.482                                                        | 7.597                          | 2036.22            | 15468.55           | 3.665                          | 2832.74            | 10381.65           |
| A_68_P27254388 | chr10:74523771-74523815                           | NM_001081412:152   | Bcr        | INSIDE                 | 0.454                                                        | 5.537                          | 868.10             | 4807.09            | 2.512                          | 796.40             | 2000.30            |
| A_68_P30647296 | chr16:31429742-31429786                           | NM_001122683:926   | Bdh1       | INSIDE                 | 0.648                                                        | 0.187                          | 4034.26            | 755.72             | 0.121                          | 2742.05            | 332.80             |
| A_68_P21516613 | chr2:109517788-109517832                          | NM_001048139:1757  | Bdnf       | INSIDE                 | 0.564                                                        | 0.382                          | 1271.53            | 486.07             | 0.216                          | 907.30             | 195.57             |
| A_68_P21516744 | chr2:109534011-109534055                          | NM_001048142:313   | Bdnf       | INSIDE                 | 0.624                                                        | 0.327                          | 4866.44            | 1591.55            | 0.204                          | 3104.13            | 633.11             |
| A_68_P21516743 | chr2:109533914-109533958                          | NM_001048142:217   | Bdnf       | INSIDE                 | 0.638                                                        | 5.213                          | 1557.85            | 8121.61            | 3.327                          | 1736.67            | 5777.05            |
| A_68_P28731662 | chr12:110290760-110290805                         | NM_001163175:15645 | Begain     | INSIDE                 | 0.118                                                        | 20.936                         | 1132.63            | 23712.71           | 2.476                          | 1118.24            | 2768.67            |
| A_68_P28731660 | chr12:110290621-110290665                         | NM_001163175:15785 | Begain     | INSIDE                 | 0.26                                                         | 12.956                         | 567.92             | 7357.98            | 3.364                          | 577.94             | 1943.96            |
| A_68_P28731667 | chr12:110291510-110291554                         | NM_001163175:14895 | Begain     | INSIDE                 | 0.56                                                         | 4.065                          | 2278.81            | 9264.17            | 2.276                          | 1868.79            | 4254.06            |
| A_68_P27100527 | chr10:43198488-43198532                           | NM_199028:-435     | Bend3      | PROMOTER               | 0.13                                                         | 2.982                          | 979.36             | 2920.49            | 0.388                          | 797.53             | 309.83             |
| A_68_P23767821 | chr5:67817925-67817969                            | NM_001164806:1092  | Bend4      | INSIDE                 | 0.16                                                         | 0.327                          | 4732.42            | 1545.14            | 0.052                          | 3232.17            | 168.69             |
| A_68_P23767820 | chr5:67817841-67817885                            | NM_001164806:1176  | Bend4      | INSIDE                 | 0.216                                                        | 0.578                          | 3608.95            | 2086.94            | 0.125                          | 2359.90            | 295.43             |
| A_68_P23767828 | chr5:67819201-67819245                            | NM_001164806:-184  | Bend4      | PROMOTER               | 0.381                                                        | 0.722                          | 1839.29            | 1327.68            | 0.275                          | 1590.27            | 437.76             |
| A_68_P23767822 | chr5:67818022-67818066                            | NM_001164806:994   | Bend4      | INSIDE                 | 0.521                                                        | 2.948                          | 2702.94            | 7967.28            | 1.536                          | 2483.77            | 3815.79            |
| A_68_P20135584 | chr1:33964894-33964938                            | NM_177235:-450     | Bend6      | PROMOTER               | 0.515                                                        | 7.060                          | 1116.02            | 7878.99            | 3.638                          | 1174.60            | 4273.29            |
| A_68_P25585266 | chr7:148042623-148042667                          | NM_018742:-362     | Bet11      | DIVERGENT_PROMOTER     | 0.629                                                        | 0.642                          | 4076.23            | 2615.98            | 0.403                          | 2942.13            | 1187.03            |
| A_68_P21969040 | chr3:1795766-17957810                             | NM_021560:1464     | Bhlhe22    | INSIDE                 | 0.206                                                        | 57.716                         | 4680.70            | 270149.80          | 11.891                         | 5112.74            | 60797.59           |
| A_68_P21969034 | chr3:17954954-17954998                            | NM_021560:652      | Bhlhe22    | INSIDE                 | 0.588                                                        | 3.497                          | 787.37             | 2753.30            | 2.057                          | 694.22             | 1428.24            |
| A_68_P21906145 | chr2:180511577-180511621                          | NM_080641:7        | Bhlhe23    | INSIDE                 | 0.592                                                        | 4.099                          | 1170.76            | 4798.68            | 2.425                          | 1051.80            | 2550.12            |
| A_68_P24735108 | chr6:108610209-108610253                          | NM_011498:-392     | Bhlhe40    | PROMOTER               | 0.255                                                        | 6.282                          | 958.12             | 6018.92            | 1.602                          | 931.24             | 1491.94            |
| A_68_P24925489 | chr6:145814071-145814115                          | NM_024469:-232     | Bhlhe41    | PROMOTER               | 0.536                                                        | 2.977                          | 2170.86            | 6463.06            | 1.595                          | 1797.75            | 2868.20            |
| A_68_P24800930 | chr6:120866663-120866707                          | NM_007544:154      | Bid        | INSIDE                 | 0.633                                                        | 2.207                          | 2437.44            | 5379.47            | 1.398                          | 1954.34            | 2732.17            |
| A_68_P30388927 | chr15:83357675-83357720                           | NM_007546:406      | Bik        | INSIDE                 | 0.412                                                        | 0.234                          | 2389.04            | 559.97             | 0.096                          | 1811.76            | 174.78             |
| A_68_P30388923 | chr15:83357292-83357336                           | NM_007546:23       | Bik        | INSIDE                 | 0.383                                                        | 0.731                          | 1742.68            | 1274.18            | 0.28                           | 1483.70            | 415.05             |
| A_68_P30388925 | chr15:83357441-83357485                           | NM_007546:171      | Bik        | INSIDE                 | 0.604                                                        | 0.646                          | 1155.50            | 746.57             | 0.39                           | 909.66             | 355.22             |
| A_68_P29699202 | chr14:70499993-70500037                           | NM_021328:63       | Bin3       | INSIDE                 | 0.475                                                        | 4.030                          | 2028.17            | 8173.03            | 1.913                          | 1641.65            | 3141.13            |
| A_68_P26289571 | chr9:7837078-7837122                              | NM_007465:-1845    | Birc2      | PROMOTER               | 0.664                                                        | 0.507                          | 944.11             | 478.50             | 0.337                          | 766.08             | 257.79             |
| A_68_P28167547 | chr11:117710471-117710515                         | NM_001012273:-58   | Birc5      | PROMOTER               | 0.548                                                        | 9.427                          | 1440.42            | 13578.71           | 5.163                          | 1171.72            | 6049.61            |
| A_68_P31351860 | chr17:74928474-74928518                           | NM_007566:862      | Birc6      | INSIDE                 | 0.265                                                        | 0.401                          | 2541.99            | 1019.90            | 0.106                          | 1694.28            | 179.92             |
| A_68_P31351861 | chr17:74928573-74928617                           | NM_007566:960      | Birc6      | INSIDE                 | 0.43                                                         | 0.641                          | 2626.09            | 1682.05            | 0.276                          | 1976.12            | 544.87             |
| A_68_P31351852 | chr17:74927433-74927479                           | NM_007566:-178     | Birc6      | PROMOTER               | 0.614                                                        | 0.614                          | 950.76             | 583.37             | 0.377                          | 720.46             | 271.33             |
| A_68_P25267236 | chr7:87679497-87679541                            | NM_007550:366      | Blm        | INSIDE                 | 0.539                                                        | 0.533                          | 1066.63            | 568.71             | 0.288                          | 842.05             | 242.20             |
| A_68_P21040878 | chr2:18610287-18610336                            | NM_007552:11667    | Bmi1       | DOWNSTREAM             | 0.496                                                        | 8.487                          | 398.67             | 3383.50            | 4.21                           | 360.12             | 1515.91            |
| A_68_P21040880 | chr2:18610461-18610505                            | NM_007552:11838    | Bmi1       | DOWNSTREAM             | 0.574                                                        | 0.674                          | 1388.86            | 935.55             | 0.386                          | 1308.97            | 505.81             |
| A_68_P21040812 | chr2:18602535-18602579                            | NM_007552:3912     | Bmi1       | INSIDE                 | 0.434                                                        | 4.253                          | 996.33             | 4237.08            | 1.848                          | 906.62             | 1675.23            |
| A_68_P21646236 | chr2:133380456-133380500                          | NM_007553:1544     | Bmp2       | INSIDE                 | 0.638                                                        | 5.024                          | 2068.20            | 10390.65           | 3.205                          | 1686.06            | 5404.34            |
| A_68_P21646220 | chr2:133378597-133378641                          | NM_007553:-316     | Bmp2       | PROMOTER               | 0.64                                                         | 0.453                          | 2075.40            | 939.62             | 0.29                           | 1603.24            | 464.64             |
| A_68_P21646214 | chr2:133377926-133377970                          | NM_007553:-986     | Bmp2       | PROMOTER               | 0.468                                                        | 5.989                          | 375.20             | 2247.19            | 2.802                          | 354.52             | 993.19             |
| A_68_P21646233 | chr2:133380149-133380193                          | NM_007553:1236     | Bmp2       | INSIDE                 | 0.637                                                        | 0.683                          | 1350.18            | 921.94             | 0.435                          | 1236.91            | 538.33             |
| A_68_P23909957 | chr5:97427058-97427102                            | NM_080708:373      | Bmp2k      | INSIDE                 | 0.405                                                        | 1.492                          | 1539.59            | 2297.35            | 0.604                          | 1297.78            | 784.12             |
| A_68_P29575957 | chr14:47007792-47007836                           | NM_007554:2460     | Bmp4       | INSIDE                 | 0.022                                                        | 8.494                          | 5170.97            | 43920.79           | 0.19                           | 3557.01            | 677.53             |
| A_68_P29575956 | chr14:47007694-47007740                           | NM_007554:2558     | Bmp4       | INSIDE                 | 0.058                                                        | 5.298                          | 1121.59            | 5942.55            | 0.308                          | 732.98             | 225.45             |

| ProbeName      | Target position of probe on CpG island microarray | TargetID           | GeneSymbol | CpG island Description | Ratio of relative methylation (TiO <sub>2</sub> -NP/Vehicle) | Sham group                     |                    |                    | TiO <sub>2</sub> -H group      |                    |                    |
|----------------|---------------------------------------------------|--------------------|------------|------------------------|--------------------------------------------------------------|--------------------------------|--------------------|--------------------|--------------------------------|--------------------|--------------------|
|                |                                                   |                    |            |                        |                                                              | Relative methylation (Cy5/Cy3) | Cy3 signal (Input) | Cy5 signal (MeDIP) | Relative methylation (Cy5/Cy3) | Cy3 signal (Input) | Cy5 signal (MeDIP) |
| A_68_P23262157 | chr4:123019781-123019825                          | NM_007558:244      | Bmp8a      | INSIDE                 | 0.62                                                         | 2.786                          | 2262.42            | 6303.18            | 1.727                          | 1798.22            | 3105.00            |
| A_68_P23260769 | chr4:122782545-122782589                          | NM_007559:159      | Bmp8b      | INSIDE                 | 0.492                                                        | 0.402                          | 1218.82            | 489.48             | 0.198                          | 878.60             | 173.66             |
| A_68_P23260770 | chr4:122782660-122782704                          | NM_007559:275      | Bmp8b      | INSIDE                 | 0.386                                                        | 3.777                          | 2155.10            | 8139.71            | 1.457                          | 1651.92            | 2406.81            |
| A_68_P26356132 | chr9:23028173-23028217                            | NM_028472:675      | Bmper      | INSIDE                 | 0.637                                                        | 0.565                          | 1220.61            | 690.02             | 0.36                           | 996.58             | 358.94             |
| A_68_P29530305 | chr14:35315556-35315600                           | NM_009758:154      | Bmpr1a     | INSIDE                 | 0.365                                                        | 9.997                          | 2235.91            | 22352.38           | 3.652                          | 2080.80            | 7598.85            |
| A_68_P29530306 | chr14:35315823-35315867                           | NM_009758:-112     | Bmpr1a     | PROMOTER               | 0.489                                                        | 6.165                          | 726.39             | 4477.99            | 3.011                          | 703.14             | 2117.49            |
| A_68_P20265717 | chr1:59820840-59820884                            | NM_007561:-618     | Bmpr2      | PROMOTER               | 0.428                                                        | 0.451                          | 1406.43            | 633.87             | 0.193                          | 1044.93            | 201.38             |
| A_68_P20265713 | chr1:59820408-59820452                            | NM_007561:-1050    | Bmpr2      | PROMOTER               | 0.443                                                        | 0.328                          | 1420.26            | 466.40             | 0.145                          | 1181.27            | 171.80             |
| A_68_P24786758 | chr6:118369210-118369254                          | NM_194339:203      | Bms1       | INSIDE                 | 0.401                                                        | 4.261                          | 3238.75            | 13800.05           | 1.709                          | 2652.18            | 4532.44            |
| A_68_P24786762 | chr6:118369695-118369739                          | NM_194339:-281     | Bms1       | PROMOTER               | 0.645                                                        | 0.627                          | 1175.95            | 737.11             | 0.404                          | 975.67             | 394.44             |
| A_68_P24786761 | chr6:118369586-118369630                          | NM_194339:-173     | Bms1       | PROMOTER               | 0.442                                                        | 1.343                          | 2003.93            | 2691.93            | 0.594                          | 1661.59            | 986.21             |
| A_68_P23069979 | chr4:84320697-84320741                            | NM_172870:272      | Bnc2       | INSIDE                 | 0.572                                                        | 2.834                          | 918.33             | 2602.37            | 1.62                           | 773.63             | 1253.59            |
| A_68_P31112418 | chr17:26918319-26918363                           | NM_172149:317      | Bnip1      | INSIDE                 | 0.217                                                        | 12.851                         | 4364.71            | 56092.84           | 2.794                          | 4358.11            | 12178.19           |
| A_68_P26613990 | chr9:69837096-69837140                            | NM_016787:-189     | Bnip2      | PROMOTER               | 0.41                                                         | 4.243                          | 1642.47            | 6968.59            | 1.738                          | 1328.42            | 2308.37            |
| A_68_P25574804 | chr7:146101607-146101651                          | NM_009760:-439     | Bnip3      | PROMOTER               | 0.171                                                        | 2.925                          | 2988.77            | 8743.16            | 0.499                          | 2130.47            | 1062.66            |
| A_68_P29682512 | chr14:67627253-67627297                           | NM_009761:440      | Bnip3l     | INSIDE                 | 0.478                                                        | 6.879                          | 2842.18            | 19551.47           | 3.288                          | 2907.74            | 9560.25            |
| A_68_P25501814 | chr7:133839542-133839586                          | NM_175103:51       | Bola2      | INSIDE                 | 0.272                                                        | 0.458                          | 1975.02            | 905.31             | 0.125                          | 1391.06            | 173.59             |
| A_68_P20241452 | chr1:55419871-55419915                            | NM_00113367:-341   | Boll       | PROMOTER               | 0.274                                                        | 1.889                          | 3515.30            | 6642.09            | 0.517                          | 2901.79            | 1500.78            |
| A_68_P28936243 | chr13:34129600-34129644                           | NM_026512:113      | Bphl       | INSIDE                 | 0.536                                                        | 3.029                          | 1320.28            | 3998.73            | 1.624                          | 1000.91            | 1625.64            |
| A_68_P31152238 | chr17:34259488-34259532                           | NM_010238:-818     | Brd2       | PROMOTER               | 0.051                                                        | 91.383                         | 1889.28            | 172647.80          | 4.678                          | 1624.16            | 7597.16            |
| A_68_P31152204 | chr17:34255264-34255308                           | NR_037970:1559     | Brd2       | INSIDE                 | 0.086                                                        | 2.800                          | 4230.35            | 11845.81           | 0.241                          | 2779.17            | 670.53             |
| A_68_P31152236 | chr17:34259233-34259277                           | NM_010238:-562     | Brd2       | PROMOTER               | 0.222                                                        | 38.606                         | 2811.72            | 108549.20          | 8.554                          | 2824.01            | 24157.37           |
| A_68_P31152205 | chr17:34255338-34255382                           | NR_037970:1485     | Brd2       | INSIDE                 | 0.368                                                        | 0.327                          | 2011.88            | 657.03             | 0.12                           | 1458.13            | 175.35             |
| A_68_P31152224 | chr17:34257661-34257705                           | NR_037970:-837     | Brd2       | PROMOTER               | 0.383                                                        | 0.592                          | 2299.28            | 1360.34            | 0.226                          | 1346.03            | 304.81             |
| A_68_P31152235 | chr17:34259132-34259176                           | NM_010238:-462     | Brd2       | PROMOTER               | 0.551                                                        | 5.812                          | 651.04             | 3784.02            | 3.203                          | 608.17             | 1947.68            |
| A_68_P31152218 | chr17:34257026-34257071                           | NR_037970:-203     | Brd2       | PROMOTER               | 0.334                                                        | 1.743                          | 2863.63            | 4991.91            | 0.582                          | 2037.95            | 1185.17            |
| A_68_P21084957 | chr2:27331585-27331629                            | NM_00113373:-413   | Brd3       | PROMOTER               | 0.339                                                        | 0.576                          | 1552.46            | 894.13             | 0.195                          | 1182.15            | 230.67             |
| A_68_P21084948 | chr2:27330582-27330626                            | NM_023336:314      | Brd3       | INSIDE                 | 0.347                                                        | 4.152                          | 2118.25            | 8795.11            | 1.44                           | 1852.18            | 2666.56            |
| A_68_P24160214 | chr5:145016060-145016104                          | NM_018772:-11      | Bri3       | PROMOTER               | 0.221                                                        | 14.169                         | 1114.39            | 15789.74           | 3.137                          | 1066.83            | 3347.14            |
| A_68_P24066928 | chr5:125921960-125922004                          | NM_029752:45       | Bri3bp     | INSIDE                 | 0.365                                                        | 3.911                          | 1870.63            | 7316.75            | 1.429                          | 1618.13            | 2312.52            |
| A_68_P28453879 | chr12:56937597-56937641                           | NM_001037756:266   | Brms1l     | INSIDE                 | 0.408                                                        | 0.168                          | 4203.46            | 707.48             | 0.069                          | 3271.85            | 224.45             |
| A_68_P28453876 | chr12:56937237-56937281                           | NM_001037756:-94   | Brms1l     | PROMOTER               | 0.572                                                        | 0.400                          | 1962.25            | 784.96             | 0.229                          | 1543.52            | 353.38             |
| A_68_P28454005 | chr12:56962212-56962256                           | NM_001037756:24882 | Brms1l     | INSIDE                 | 0.532                                                        | 2.981                          | 3203.24            | 9548.66            | 1.585                          | 2425.17            | 3843.04            |
| A_68_P32957256 | chr17:8476298-8476342                             | NM_018819:-357     | Brp44l     | PROMOTER               | 0.615                                                        | 2.902                          | 677.40             | 1965.83            | 1.786                          | 633.21             | 1130.69            |
| A_68_P31124371 | chr17:28938550-28938594                           | NM_001081315:502   | Brp63      | INSIDE                 | 0.223                                                        | 23.787                         | 9729.95            | 231451.10          | 5.293                          | 9725.33            | 51476.29           |
| A_68_P24950090 | chr7:4658912-4658956                              | NM_001003920:16405 | Brsk1      | INSIDE                 | 0.37                                                         | 5.176                          | 5220.64            | 27024.57           | 1.916                          | 4352.92            | 8340.51            |
| A_68_P25591880 | chr7:149136294-149136338                          | NM_001009929:326   | Brsk2      | INSIDE                 | 0.505                                                        | 15.352                         | 609.09             | 9350.69            | 7.759                          | 557.91             | 4328.78            |
| A_68_P30990992 | chr16:96303585-96303629                           | NM_145125:429      | Brwd1      | INSIDE                 | 0.411                                                        | 4.185                          | 2679.07            | 11212.37           | 1.72                           | 2033.25            | 3497.01            |
| A_68_P30990999 | chr16:96304407-96304451                           | NM_145125:-393     | Brwd1      | PROMOTER               | 0.589                                                        | 3.302                          | 5098.08            | 16833.21           | 1.946                          | 4056.47            | 7894.86            |
| A_68_P23296721 | chr4:129138758-129138806                          | NM_133889:-140     | Bsdc1      | PROMOTER               | 0.193                                                        | 0.411                          | 2799.32            | 1149.94            | 0.079                          | 2212.35            | 175.42             |
| A_68_P27278360 | chr10:79167439-79167483                           | NM_001077184:358   | Bsg        | INSIDE                 | 0.644                                                        | 0.526                          | 2025.61            | 1066.37            | 0.339                          | 1452.92            | 492.95             |
| A_68_P26813123 | chr9:108017642-108017686                          | NM_007567:75050    | Bsn        | INSIDE                 | 0.232                                                        | 7.651                          | 2451.89            | 18760.47           | 1.772                          | 1618.66            | 2868.00            |
| A_68_P26813122 | chr9:108017527-108017571                          | NM_007567:75166    | Bsn        | INSIDE                 | 0.392                                                        | 4.448                          | 869.72             | 3868.96            | 1.743                          | 612.21             | 1066.79            |
| A_68_P22964669 | chr4:62141433-62141477                            | NM_138653:354      | Bspry      | INSIDE                 | 0.537                                                        | 0.598                          | 1987.89            | 1188.91            | 0.321                          | 1472.36            | 473.16             |
| A_68_P25274224 | chr7:88974543-88974587                            | NM_146193:-247     | Btbd1      | PROMOTER               | 0.584                                                        | 2.807                          | 1421.27            | 3990.02            | 1.638                          | 1192.91            | 1954.36            |
| A_68_P27308088 | chr10:84849580-84849624                           | NM_028709:44       | Btbd11     | INSIDE                 | 0.363                                                        | 5.968                          | 505.84             | 3018.86            | 2.164                          | 532.70             | 1152.66            |

| ProbeName      | Target position of probe on CpG island microarray | TargetID            | GeneSymbol    | CpG island Description | Ratio of relative methylation (TiO <sub>2</sub> -NP/Vehicle) | Sham group                     |                    |                    | TiO <sub>2</sub> -H group      |                    |                    |
|----------------|---------------------------------------------------|---------------------|---------------|------------------------|--------------------------------------------------------------|--------------------------------|--------------------|--------------------|--------------------------------|--------------------|--------------------|
|                |                                                   |                     |               |                        |                                                              | Relative methylation (Cy5/Cy3) | Cy3 signal (Input) | Cy5 signal (MeDIP) | Relative methylation (Cy5/Cy3) | Cy3 signal (Input) | Cy5 signal (MeDIP) |
| A_68_P25524391 | chr7:137910411-137910455                          | NM_001081038:-7150  | Btbd16        | PROMOTER               | 0.412                                                        | 5.198                          | 1835.29            | 9539.82            | 2.142                          | 1445.03            | 3095.53            |
| A_68_P28149790 | chr11:114652964-114653008                         | NM_028055:4220      | Btbd17        | INSIDE                 | 0.429                                                        | 17.782                         | 3081.33            | 54791.26           | 7.632                          | 2427.64            | 18527.63           |
| A_68_P21673348 | chr2:138082206-138082250                          | NM_001025431:-91    | Btbd3         | PROMOTER               | 0.666                                                        | 4.094                          | 1744.24            | 7141.08            | 2.729                          | 1611.60            | 4397.56            |
| A_68_P31134871 | chr17:30713349-30713393                           | NM_027060:-138      | Btbd9         | PROMOTER               | 0.334                                                        | 5.754                          | 1259.58            | 7247.39            | 1.92                           | 1113.81            | 2138.83            |
| A_68_P27371447 | chr10:96079236-96079280                           | NM_007569:-376      | Btg1          | PROMOTER               | 0.42                                                         | 5.816                          | 627.39             | 3648.73            | 2.441                          | 596.13             | 1455.21            |
| A_68_P27371450 | chr10:96079522-96079566                           | NM_007569:-90       | Btg1          | PROMOTER               | 0.109                                                        | 0.735                          | 5465.00            | 4017.31            | 0.08                           | 3737.66            | 300.05             |
| A_68_P30895871 | chr16:78377255-78377299                           | NM_009770:-246      | Btg3          | PROMOTER               | 0.251                                                        | 9.298                          | 909.23             | 8454.07            | 2.331                          | 722.63             | 1684.44            |
| A_68_P28881600 | chr13:23556264-23556308                           | NM_013483:1484      | Btn1a1        | INSIDE                 | 0.378                                                        | 7.816                          | 1808.82            | 14136.84           | 2.953                          | 1469.41            | 4339.58            |
| A_68_P32139022 | chr19:45616075-45616119                           | NM_001037758:177873 | Btrc          | DOWNSTREAM             | 0.564                                                        | 4.742                          | 606.55             | 2876.04            | 2.673                          | 554.39             | 1482.12            |
| A_68_P32139025 | chr19:45616402-45616446                           | NM_001037758:178201 | Btrc          | DOWNSTREAM             | 0.482                                                        | 0.634                          | 1497.18            | 949.51             | 0.306                          | 1157.24            | 353.63             |
| A_68_P21564938 | chr2:118423956-118424000                          | NM_009773:32        | Bub1b         | INSIDE                 | 0.219                                                        | 0.698                          | 1614.14            | 1125.97            | 0.153                          | 1128.93            | 172.46             |
| A_68_P20258663 | chr1:58450520-58450564                            | NM_025824:563       | Bzw1          | INSIDE                 | 0.403                                                        | 6.668                          | 2543.96            | 16962.58           | 2.684                          | 2055.39            | 5516.78            |
| A_68_P32053393 | chr19:29597512-29597556                           | NM_001081319:763    | C030046E11Rik | INSIDE                 | 0.395                                                        | 0.339                          | 1486.88            | 504.69             | 0.134                          | 1297.41            | 173.90             |
| A_68_P20411731 | chr1:88256083-88256127                            | NR_015507:-44       | C130036L24Rik | DIVERGENT_PROMOTER     | 0.315                                                        | 15.338                         | 3670.81            | 56302.52           | 4.83                           | 3259.67            | 15743.25           |
| A_68_P28596927 | chr12:85533988-85534032                           | NM_001163502:955    | C130039O16Rik | INSIDE                 | 0.345                                                        | 0.313                          | 1970.82            | 615.89             | 0.108                          | 1591.11            | 171.66             |
| A_68_P28596933 | chr12:85534608-85534652                           | NM_001163502:335    | C130039O16Rik | INSIDE                 | 0.449                                                        | 8.761                          | 1564.10            | 13703.84           | 3.936                          | 1243.46            | 4894.59            |
| A_68_P28596932 | chr12:85534521-85534565                           | NM_001163502:423    | C130039O16Rik | INSIDE                 | 0.517                                                        | 9.653                          | 3977.73            | 38396.10           | 4.988                          | 3056.07            | 15242.71           |
| A_68_P29187496 | chr13:83860499-83860543                           | NR_015561:-7190     | C130071C03Rik | PROMOTER               | 0.503                                                        | 8.251                          | 1181.56            | 9748.55            | 4.148                          | 990.02             | 4106.73            |
| A_68_P24222816 | chr6:7794688-7794732                              | NM_052993:-513      | C1galt1       | PROMOTER               | 0.582                                                        | 3.926                          | 549.15             | 2156.18            | 2.284                          | 452.58             | 1033.60            |
| A_68_P32328720 | chrX:35988386-35988430                            | NM_021550:-88       | C1galt1c1     | PROMOTER               | 0.429                                                        | 3.537                          | 1203.21            | 4255.94            | 1.517                          | 1642.40            | 2491.15            |
| A_68_P28082431 | chr11:102807578-102807622                         | NM_011795:175       | C1ql1         | INSIDE                 | 0.585                                                        | 12.097                         | 553.53             | 6695.87            | 7.075                          | 401.18             | 2838.46            |
| A_68_P28082450 | chr11:102809915-102809959                         | NM_011795:-2161     | C1ql1         | PROMOTER               | 0.494                                                        | 3.453                          | 2281.00            | 7875.28            | 1.706                          | 1882.37            | 3211.48            |
| A_68_P28082435 | chr11:102808047-102808091                         | NM_011795:-293      | C1ql1         | PROMOTER               | 0.336                                                        | 4.816                          | 1263.59            | 6085.87            | 1.617                          | 1178.83            | 1905.91            |
| A_68_P20561482 | chr1:122238470-122238514                          | NM_207233:1334      | C1ql2         | INSIDE                 | 0.639                                                        | 3.274                          | 2078.14            | 6803.77            | 2.091                          | 1698.50            | 3551.38            |
| A_68_P20561486 | chr1:122238913-122238957                          | NM_207233:1776      | C1ql2         | INSIDE                 | 0.64                                                         | 2.521                          | 913.58             | 2302.76            | 1.614                          | 780.50             | 1259.90            |
| A_68_P21013699 | chr2:12932692-12932736                            | NM_153155:-223      | C1ql3         | PROMOTER               | 0.237                                                        | 34.259                         | 1302.72            | 44630.10           | 8.115                          | 1735.37            | 14081.97           |
| A_68_P21013703 | chr2:12933075-12933119                            | NM_153155:-605      | C1ql3         | PROMOTER               | 0.552                                                        | 4.135                          | 643.14             | 2659.25            | 2.283                          | 509.30             | 1162.63            |
| A_68_P30478152 | chr15:98918819-98918863                           | NM_001024702:-681   | C1ql4         | PROMOTER               | 0.335                                                        | 6.034                          | 1212.17            | 7314.40            | 2.023                          | 1025.53            | 2074.77            |
| A_68_P30478144 | chr15:98917975-98918019                           | NM_001024702:163    | C1ql4         | INSIDE                 | 0.663                                                        | 14.271                         | 711.81             | 10157.85           | 9.465                          | 672.16             | 6326.29            |
| A_68_P30478150 | chr15:98918593-98918637                           | NM_001024702:-455   | C1ql4         | PROMOTER               | 0.365                                                        | 4.568                          | 1314.17            | 6003.35            | 1.666                          | 1424.67            | 2373.11            |
| A_68_P21419450 | chr2:90726161-90726205                            | NM_026161:240       | C1qtnf4       | INSIDE                 | 0.327                                                        | 11.570                         | 2503.08            | 28960.75           | 3.786                          | 2009.35            | 7608.11            |
| A_68_P21419479 | chr2:90729985-90730029                            | NM_026161:4064      | C1qtnf4       | INSIDE                 | 0.455                                                        | 28.067                         | 622.41             | 17469.03           | 12.776                         | 537.59             | 6868.19            |
| A_68_P26536114 | chr9:56265361-56265405                            | NM_172924:475       | C230081A13Rik | INSIDE                 | 0.444                                                        | 4.912                          | 2183.57            | 10726.57           | 2.179                          | 1916.51            | 4176.11            |
| A_68_P23351277 | chr4:138908735-138908779                          | NM_001039200:249    | C230096C10Rik | INSIDE                 | 0.17                                                         | 30.146                         | 994.16             | 29970.21           | 5.12                           | 891.73             | 4565.48            |
| A_68_P26600872 | chr9:67607645-67607689                            | NM_001081314:423    | C2cd4b        | INSIDE                 | 0.537                                                        | 5.580                          | 1650.69            | 9211.53            | 2.995                          | 1477.46            | 4424.74            |
| A_68_P27277812 | chr10:79074932-79074976                           | NM_198614:1809      | C2cd4c        | INSIDE                 | 0.38                                                         | 9.509                          | 547.37             | 5204.67            | 3.618                          | 659.00             | 2384.07            |
| A_68_P22338541 | chr3:94168285-94168329                            | NM_001136117:1941   | C2cd4d        | INSIDE                 | 0.384                                                        | 11.368                         | 5078.60            | 57733.53           | 4.364                          | 4296.14            | 18747.69           |
| A_68_P22338534 | chr3:94167626-94167670                            | NM_001136117:1283   | C2cd4d        | INSIDE                 | 0.419                                                        | 16.593                         | 1784.18            | 29604.09           | 6.956                          | 1838.73            | 12789.81           |
| A_68_P25022916 | chr7:29415707-29415751                            | NM_175319:306       | C330005M16Rik | INSIDE                 | 0.429                                                        | 4.137                          | 1210.85            | 5009.24            | 1.776                          | 984.22             | 1748.06            |
| A_68_P23585864 | chr5:33196991-33197035                            | NM_194340:-133      | C330019G07Rik | DIVERGENT_PROMOTER     | 0.43                                                         | 1.397                          | 2315.88            | 3235.93            | 0.6                            | 1916.46            | 1150.33            |
| A_68_P32385501 | chrX:50410354-50410398                            | NR_038184:-9        | C430049B03Rik | PROMOTER               | 0.516                                                        | 3.883                          | 2016.43            | 7830.03            | 2.004                          | 2607.68            | 5224.75            |
| A_68_P23818500 | chr5:77286506-77286550                            | NM_001163793:16905  | C530008M17Rik | INSIDE                 | 0.155                                                        | 22.025                         | 6150.51            | 135467.70          | 3.418                          | 4676.53            | 15983.63           |
| A_68_P23818501 | chr5:77286574-77286618                            | NM_001163793:16973  | C530008M17Rik | INSIDE                 | 0.19                                                         | 9.317                          | 2590.22            | 24132.85           | 1.77                           | 1866.44            | 3303.01            |
| A_68_P23818499 | chr5:77286360-77286404                            | NM_001163793:16759  | C530008M17Rik | INSIDE                 | 0.577                                                        | 3.543                          | 1854.57            | 6571.19            | 2.046                          | 1336.67            | 2734.18            |
| A_68_P23818506 | chr5:77287203-77287247                            | NM_001163793:17601  | C530008M17Rik | INSIDE                 | 0.376                                                        | 5.047                          | 1202.83            | 6070.12            | 1.898                          | 805.69             | 1529.02            |
| A_68_P24818073 | chr6:124947045-124947089                          | NM_001145927:-1388  | C530028O21Rik | PROMOTER               | 0.588                                                        | 0.601                          | 3758.75            | 2259.33            | 0.353                          | 2893.67            | 1022.90            |

| ProbeName      | Target position of probe on CpG island microarray | TargetID            | GeneSymbol    | CpG island Description | Ratio of relative methylation (TiO <sub>2</sub> -NP/Vehicle) | Sham group                     |                    |                    | TiO <sub>2</sub> -H group      |                    |                    |
|----------------|---------------------------------------------------|---------------------|---------------|------------------------|--------------------------------------------------------------|--------------------------------|--------------------|--------------------|--------------------------------|--------------------|--------------------|
|                |                                                   |                     |               |                        |                                                              | Relative methylation (Cy5/Cy3) | Cy3 signal (Input) | Cy5 signal (MeDIP) | Relative methylation (Cy5/Cy3) | Cy3 signal (Input) | Cy5 signal (MeDIP) |
| A_68_P28153096 | chr11:115229081-115229125                         | NM_175454:-69       | C630004H02Rik | PROMOTER               | 0.245                                                        | 23.289                         | 4537.44            | 105670.70          | 5.702                          | 4202.80            | 23966.05           |
| A_68_P28153095 | chr11:115228977-115229021                         | NM_175454:35        | C630004H02Rik | INSIDE                 | 0.266                                                        | 9.030                          | 1026.60            | 9270.40            | 2.406                          | 1016.81            | 2446.67            |
| A_68_P28153091 | chr11:115228565-115228611                         | NM_175454:445       | C630004H02Rik | INSIDE                 | 0.654                                                        | 0.313                          | 4449.23            | 1393.40            | 0.205                          | 3434.93            | 703.82             |
| A_68_P23295623 | chr4:128900595-128900639                          | NM_001033189:25071  | C777080       | INSIDE                 | 0.469                                                        | 3.747                          | 1107.58            | 4150.07            | 1.757                          | 997.33             | 1752.02            |
| A_68_P32576281 | chrX:101395430-101395474                          | NM_001077354:1004   | C777370       | INSIDE                 | 0.348                                                        | 13.531                         | 512.39             | 6933.33            | 4.712                          | 590.71             | 2783.38            |
| A_68_P32576286 | chrX:101396172-101396216                          | NM_001077354:262    | C777370       | INSIDE                 | 0.351                                                        | 12.480                         | 6571.38            | 82013.71           | 4.381                          | 5761.15            | 25238.47           |
| A_68_P32576282 | chrX:101395577-101395621                          | NM_001077354:858    | C777370       | INSIDE                 | 0.656                                                        | 5.136                          | 1407.38            | 7228.93            | 3.371                          | 1682.83            | 5672.79            |
| A_68_P32576283 | chrX:101395692-101395736                          | NM_001077354:742    | C777370       | INSIDE                 | 0.665                                                        | 11.288                         | 4621.00            | 52161.64           | 7.502                          | 4579.56            | 34356.70           |
| A_68_P29009048 | chr13:46764994-46765038                           | NM_001033192:126    | C78339        | INSIDE                 | 0.663                                                        | 3.848                          | 1882.86            | 7245.26            | 2.551                          | 1612.87            | 4114.42            |
| A_68_P29638535 | chr14:60059777-60059821                           | NM_026908:-19       | Cab39l        | DIVERGENT_PROMOTER     | 0.6                                                          | 0.400                          | 1356.84            | 543.16             | 0.24                           | 1082.58            | 260.08             |
| A_68_P27257833 | chr10:75130195-75130239                           | NM_172549:96886     | Cabin1        | INSIDE                 | 0.106                                                        | 41.894                         | 1344.03            | 56307.31           | 4.457                          | 1136.09            | 5063.76            |
| A_68_P27258519 | chr10:75226844-75226888                           | NM_172549:236       | Cabin1        | INSIDE                 | 0.42                                                         | 3.640                          | 1245.52            | 4533.85            | 1.529                          | 1169.17            | 1787.89            |
| A_68_P31497275 | chr18:11998719-11998763                           | NM_001146287:958    | Cables1       | INSIDE                 | 0.448                                                        | 6.001                          | 992.84             | 5958.41            | 2.69                           | 969.76             | 2608.45            |
| A_68_P26020780 | chr8:87141005-87141050                            | NM_007578:201765    | Caena1a       | INSIDE                 | 0.16                                                         | 2.635                          | 1961.17            | 5167.85            | 0.421                          | 1395.90            | 587.37             |
| A_68_P26019658 | chr8:86939377-86939421                            | NM_007578:136       | Caena1a       | INSIDE                 | 0.436                                                        | 8.476                          | 1792.24            | 15191.33           | 3.699                          | 1527.36            | 5649.57            |
| A_68_P26019650 | chr8:86938371-86938415                            | NM_007578:-870      | Caena1a       | PROMOTER               | 0.463                                                        | 4.961                          | 798.21             | 3960.08            | 2.297                          | 700.62             | 1609.64            |
| A_68_P26020866 | chr8:87163478-87163522                            | NM_007578:224238    | Caena1a       | INSIDE                 | 0.539                                                        | 5.259                          | 252.87             | 1329.87            | 2.837                          | 209.27             | 593.67             |
| A_68_P21067473 | chr2:24534821-24534865                            | NM_001042528:83725  | Caena1b       | INSIDE                 | 0.427                                                        | 0.699                          | 1201.97            | 840.29             | 0.299                          | 948.82             | 283.41             |
| A_68_P24791280 | chr6:119057361-119057405                          | NM_001159533:825    | Caena1c       | INSIDE                 | 0.409                                                        | 8.605                          | 2938.89            | 25289.94           | 3.515                          | 2258.37            | 7938.79            |
| A_68_P24791281 | chr6:119057478-119057522                          | NM_001159533:707    | Caena1c       | INSIDE                 | 0.527                                                        | 0.437                          | 2690.74            | 1175.62            | 0.23                           | 2248.64            | 517.94             |
| A_68_P28033148 | chr11:94335730-94335774                           | NM_001112813:-240   | Caena1g       | PROMOTER               | 0.456                                                        | 0.339                          | 8052.87            | 2726.92            | 0.154                          | 5260.55            | 812.56             |
| A_68_P31103375 | chr17:25522729-25522773                           | NM_001163691:47978  | Caena1h       | INSIDE                 | 0.064                                                        | 33.629                         | 2814.74            | 94657.34           | 2.16                           | 1945.45            | 4202.67            |
| A_68_P31103785 | chr17:25571124-25571168                           | NM_001163691:-418   | Caena1h       | PROMOTER               | 0.5                                                          | 3.993                          | 714.25             | 2852.00            | 1.995                          | 627.78             | 1252.50            |
| A_68_P31103374 | chr17:25522637-25522681                           | NM_001163691:48070  | Caena1h       | INSIDE                 | 0.448                                                        | 3.324                          | 2200.74            | 7315.58            | 1.489                          | 1731.93            | 2578.50            |
| A_68_P26808316 | chr9:107302358-107302402                          | NM_001174047:170    | Caena2d2      | INSIDE                 | 0.116                                                        | 18.385                         | 3243.54            | 59632.11           | 2.137                          | 2642.89            | 5647.97            |
| A_68_P26809312 | chr9:107429515-107429561                          | NM_001174047:127328 | Caena2d2      | INSIDE                 | 0.475                                                        | 0.610                          | 1750.78            | 1068.25            | 0.29                           | 1058.21            | 306.65             |
| A_68_P28053990 | chr11:97883852-97883896                           | NM_001159320:-4188  | Caenb1        | PROMOTER               | 0.559                                                        | 2.914                          | 2419.96            | 7051.96            | 1.629                          | 1991.41            | 3243.40            |
| A_68_P21021376 | chr2:14525863-14525907                            | NM_023116:-48       | Caenb2        | PROMOTER               | 0.635                                                        | 2.576                          | 1357.19            | 3495.53            | 1.636                          | 1199.92            | 1962.95            |
| A_68_P30475601 | chr15:98465084-98465128                           | NM_007581:-88       | Caenb3        | PROMOTER               | 0.422                                                        | 0.328                          | 2803.49            | 920.39             | 0.138                          | 1947.75            | 269.74             |
| A_68_P21221051 | chr2:52531541-52531585                            | NM_001037099:539    | Caenb4        | INSIDE                 | 0.453                                                        | 15.981                         | 1281.98            | 20486.63           | 7.233                          | 1394.12            | 10083.60           |
| A_68_P30357863 | chr15:77950040-77950084                           | NM_007583:-352      | Caeng2        | PROMOTER               | 0.326                                                        | 8.121                          | 1628.11            | 13221.89           | 2.647                          | 1424.19            | 3769.50            |
| A_68_P28109101 | chr11:107655547-107655591                         | NM_019431:210       | Caeng4        | INSIDE                 | 0.516                                                        | 4.770                          | 2299.97            | 10971.75           | 2.463                          | 1699.51            | 4185.43            |
| A_68_P28109104 | chr11:107655957-107656001                         | NM_019431:-200      | Caeng4        | PROMOTER               | 0.597                                                        | 10.288                         | 1976.14            | 20330.58           | 6.141                          | 1707.82            | 10487.48           |
| A_68_P28109099 | chr11:107655337-107655381                         | NM_019431:420       | Caeng4        | INSIDE                 | 0.456                                                        | 0.542                          | 1115.63            | 604.39             | 0.247                          | 943.31             | 232.82             |
| A_68_P33005168 | chr7:3366552-3366596                              | NM_133189:29890     | Caeng7        | DOWNSTREAM             | 0.141                                                        | 24.597                         | 2749.66            | 67632.47           | 3.46                           | 2176.90            | 7532.86            |
| A_68_P33005171 | chr7:3366221-3366265                              | NM_133189:29558     | Caeng7        | INSIDE                 | 0.597                                                        | 0.527                          | 1003.46            | 528.70             | 0.315                          | 805.83             | 253.53             |
| A_68_P20837653 | chr1:175297800-175297844                          | NM_053199:4         | Cadm3         | INSIDE                 | 0.395                                                        | 0.232                          | 3839.40            | 889.00             | 0.092                          | 2591.90            | 237.29             |
| A_68_P25005093 | chr7:25266752-25266796                            | NM_153112:-267      | Cadm4         | PROMOTER               | 0.572                                                        | 0.523                          | 13146.17           | 6881.31            | 0.299                          | 8747.40            | 2619.20            |
| A_68_P29413810 | chr14:13654360-13654404                           | NM_001042617:1211   | Cadps         | INSIDE                 | 0.352                                                        | 10.336                         | 2976.79            | 30767.83           | 3.633                          | 2475.58            | 8994.55            |
| A_68_P31423374 | chr17:87846116-87846160                           | NM_007589:137       | Calm2         | INSIDE                 | 0.276                                                        | 0.271                          | 3256.17            | 882.26             | 0.075                          | 2499.18            | 187.02             |
| A_68_P31423375 | chr17:87846261-87846305                           | NM_007589:-7        | Calm2         | PROMOTER               | 0.437                                                        | 0.633                          | 3037.20            | 1921.80            | 0.276                          | 2149.29            | 593.83             |
| A_68_P31423372 | chr17:87845921-87845965                           | NM_007589:333       | Calm2         | INSIDE                 | 0.652                                                        | 3.060                          | 856.99             | 2622.03            | 1.995                          | 573.44             | 1143.80            |
| A_68_P24093838 | chr5:130925235-130925279                          | NM_021371:595       | Caln1         | INSIDE                 | 0.537                                                        | 3.250                          | 1142.90            | 3713.89            | 1.743                          | 1039.21            | 1811.82            |
| A_68_P24093843 | chr5:130925785-130925831                          | NM_021371:1147      | Caln1         | INSIDE                 | 0.518                                                        | 7.018                          | 201.60             | 1414.85            | 3.637                          | 135.18             | 491.62             |
| A_68_P20975269 | chr2:5636008-5636052                              | NM_177343:-320      | Camk1d        | PROMOTER               | 0.356                                                        | 0.417                          | 1414.25            | 589.52             | 0.149                          | 1151.35            | 171.00             |
| A_68_P20975262 | chr2:5635173-5635217                              | NM_177343:516       | Camk1d        | INSIDE                 | 0.413                                                        | 9.109                          | 1373.86            | 12513.96           | 3.765                          | 1076.47            | 4052.75            |

| ProbeName      | Target position of probe on CpG island microarray | TargetID            | GeneSymbol | CpG island Description | Ratio of relative methylation (TiO <sub>2</sub> -NP/Vehicle) | Sham group                     |                    |                    | TiO <sub>2</sub> -H group      |                    |                    |
|----------------|---------------------------------------------------|---------------------|------------|------------------------|--------------------------------------------------------------|--------------------------------|--------------------|--------------------|--------------------------------|--------------------|--------------------|
|                |                                                   |                     |            |                        |                                                              | Relative methylation (Cy5/Cy3) | Cy3 signal (Input) | Cy5 signal (MeDIP) | Relative methylation (Cy5/Cy3) | Cy3 signal (Input) | Cy5 signal (MeDIP) |
| A_68_P20975264 | chr2:5635419-5635463                              | NM_177343:270       | Camk1d     | INSIDE                 | 0.405                                                        | 0.658                          | 715.21             | 470.52             | 0.267                          | 627.08             | 167.21             |
| A_68_P27566544 | chr11:5965149-5965193                             | NM_001174053:581    | Camk2b     | INSIDE                 | 0.103                                                        | 31.487                         | 2512.80            | 79121.04           | 3.243                          | 2119.39            | 6873.85            |
| A_68_P27566548 | chr11:5966021-5966065                             | NM_001174053:-291   | Camk2b     | PROMOTER               | 0.595                                                        | 0.651                          | 2366.21            | 1539.32            | 0.387                          | 1898.32            | 734.92             |
| A_68_P23345840 | chr4:138010011-138010055                          | NM_025451:-1030     | Camk2n1    | PROMOTER               | 0.3                                                          | 5.595                          | 1091.93            | 6109.06            | 1.68                           | 914.71             | 1537.06            |
| A_68_P30588535 | chr16:20621603-20621647                           | NM_028420:-273      | Camk2n2    | DIVERGENT_PROMOTER     | 0.358                                                        | 0.309                          | 1891.84            | 584.61             | 0.11                           | 1548.86            | 171.12             |
| A_68_P30588530 | chr16:20620757-20620801                           | NM_028420:573       | Camk2n2    | INSIDE                 | 0.475                                                        | 0.303                          | 1556.21            | 472.16             | 0.144                          | 1253.33            | 180.64             |
| A_68_P30588523 | chr16:20619843-20619887                           | NM_028420:1487      | Camk2n2    | INSIDE                 | 0.333                                                        | 1.385                          | 5361.19            | 7425.40            | 0.462                          | 3892.78            | 1797.28            |
| A_68_P30588524 | chr16:20619982-20620026                           | NM_028420:1347      | Camk2n2    | INSIDE                 | 0.222                                                        | 2.906                          | 7499.33            | 21791.20           | 0.646                          | 5057.85            | 3264.86            |
| A_68_P31605184 | chr18:33099024-33099068                           | NM_009793:352       | Camk4      | INSIDE                 | 0.51                                                         | 0.429                          | 1063.84            | 456.63             | 0.219                          | 795.73             | 174.31             |
| A_68_P27914667 | chr11:72832981-72833025                           | NM_018883:493       | Camkk1     | INSIDE                 | 0.579                                                        | 2.584                          | 2572.24            | 6645.99            | 1.497                          | 2156.47            | 3228.16            |
| A_68_P24052104 | chr5:123213775-123213819                          | NM_001199676:15623  | Camkk2     | INSIDE                 | 0.076                                                        | 28.420                         | 2363.75            | 67177.75           | 2.153                          | 1587.72            | 3418.43            |
| A_68_P24052105 | chr5:123213863-123213907                          | NM_001199676:15535  | Camkk2     | INSIDE                 | 0.11                                                         | 26.181                         | 1807.01            | 47309.44           | 2.874                          | 1173.39            | 3372.58            |
| A_68_P24052194 | chr5:123229578-123229622                          | NM_001199676:-181   | Camkk2     | PROMOTER               | 0.446                                                        | 0.508                          | 910.54             | 462.63             | 0.226                          | 759.91             | 172.09             |
| A_68_P29056138 | chr13:55724621-55724665                           | NM_007596:277       | Caml       | INSIDE                 | 0.535                                                        | 3.520                          | 1312.84            | 4621.82            | 1.884                          | 1153.89            | 2173.44            |
| A_68_P21075529 | chr2:25838219-25838263                            | NM_001115076:562    | Camsap1    | INSIDE                 | 0.651                                                        | 0.389                          | 2346.77            | 913.52             | 0.254                          | 1741.88            | 441.75             |
| A_68_P23410165 | chr4:150482219-150482264                          | NM_001081557:753636 | Camta1     | INSIDE                 | 0.57                                                         | 0.751                          | 12622.66           | 9484.81            | 0.428                          | 8630.80            | 3695.08            |
| A_68_P23415131 | chr4:151235903-151235947                          | NM_001081557:-47    | Camta1     | PROMOTER               | 0.286                                                        | 2.174                          | 1740.70            | 3784.67            | 0.623                          | 1388.58            | 864.46             |
| A_68_P27489850 | chr10:118676304-118676348                         | NM_027994:785       | Cand1      | INSIDE                 | 0.527                                                        | 5.995                          | 1272.77            | 7630.83            | 3.161                          | 1209.55            | 3823.73            |
| A_68_P24772854 | chr6:115724644-115724688                          | NM_025958:92        | Cand2      | INSIDE                 | 0.089                                                        | 1.395                          | 2638.28            | 3679.97            | 0.125                          | 1689.79            | 210.69             |
| A_68_P28171198 | chr11:118280168-118280212                         | NM_001025617:176    | Cant1      | INSIDE                 | 0.653                                                        | 0.734                          | 2988.97            | 2192.62            | 0.479                          | 2141.05            | 1025.85            |
| A_68_P27788008 | chr11:50139149-50139193                           | NM_001110499:5      | Canx       | INSIDE                 | 0.308                                                        | 7.986                          | 5755.77            | 45965.27           | 2.462                          | 4536.52            | 11168.15           |
| A_68_P27788005 | chr11:50138862-50138906                           | NM_001110499:291    | Canx       | INSIDE                 | 0.384                                                        | 6.817                          | 5811.16            | 39614.81           | 2.615                          | 4800.33            | 12553.44           |
| A_68_P27788006 | chr11:50138948-50138992                           | NM_001110499:205    | Canx       | INSIDE                 | 0.653                                                        | 6.182                          | 5142.45            | 34360.58           | 4.364                          | 4329.86            | 18896.88           |
| A_68_P25354354 | chr7:105326624-105326668                          | NM_007602:57        | Capn5      | INSIDE                 | 0.404                                                        | 11.481                         | 1490.62            | 17113.11           | 4.64                           | 1318.07            | 6115.49            |
| A_68_P25354355 | chr7:105326695-105326739                          | NM_007602:-13       | Capn5      | PROMOTER               | 0.422                                                        | 8.630                          | 1253.93            | 10820.83           | 3.646                          | 1254.58            | 4574.08            |
| A_68_P29511373 | chr14:32150285-32150329                           | NM_009796:397       | Capn7      | INSIDE                 | 0.449                                                        | 5.981                          | 1448.37            | 8662.11            | 2.684                          | 1218.61            | 3270.98            |
| A_68_P24942634 | chr6:148844792-148844836                          | NM_181541:-166      | Caprin2    | PROMOTER               | 0.589                                                        | 0.145                          | 6166.70            | 892.58             | 0.085                          | 4284.85            | 365.29             |
| A_68_P24268748 | chr6:17586921-17586965                            | NM_007604:-155      | Capza2     | PROMOTER               | 0.608                                                        | 2.729                          | 822.89             | 2245.71            | 1.66                           | 801.79             | 1330.63            |
| A_68_P23350166 | chr4:138748616-138748660                          | NM_009798:-207      | Capzb      | PROMOTER               | 0.354                                                        | 10.554                         | 5320.54            | 56152.99           | 3.731                          | 5013.69            | 18706.28           |
| A_68_P23350170 | chr4:138749124-138749168                          | NM_001037761:253    | Capzb      | INSIDE                 | 0.478                                                        | 7.171                          | 328.36             | 2354.64            | 3.426                          | 315.68             | 1081.62            |
| A_68_P23350169 | chr4:138748940-138748984                          | NM_001037761:69     | Capzb      | INSIDE                 | 0.584                                                        | 0.682                          | 2915.76            | 1987.93            | 0.398                          | 2385.73            | 949.93             |
| A_68_P28025137 | chr11:92960870-92960914                           | NM_028296:289       | Car10      | INSIDE                 | 0.225                                                        | 0.507                          | 1882.53            | 955.30             | 0.114                          | 1482.01            | 168.89             |
| A_68_P28025142 | chr11:92961341-92961387                           | NM_028296:761       | Car10      | INSIDE                 | 0.372                                                        | 0.274                          | 2259.89            | 620.16             | 0.102                          | 1706.36            | 174.34             |
| A_68_P28025143 | chr11:92961409-92961453                           | NM_028296:827       | Car10      | INSIDE                 | 0.386                                                        | 0.605                          | 4277.66            | 2588.26            | 0.234                          | 2988.99            | 698.25             |
| A_68_P28025136 | chr11:92960730-92960774                           | NM_028296:149       | Car10      | INSIDE                 | 0.368                                                        | 4.170                          | 1723.20            | 7185.76            | 1.535                          | 1395.84            | 2143.21            |
| A_68_P25094544 | chr7:52955351-52955395                            | NM_009800:36        | Car11      | INSIDE                 | 0.627                                                        | 0.501                          | 2093.39            | 1049.23            | 0.314                          | 1750.88            | 550.53             |
| A_68_P21958957 | chr3:14886237-14886281                            | NM_009801:-167      | Car2       | PROMOTER               | 0.554                                                        | 5.636                          | 786.61             | 4432.94            | 3.12                           | 692.06             | 2159.41            |
| A_68_P26129049 | chr8:107064933-107064977                          | NM_053070:248       | Car7       | INSIDE                 | 0.507                                                        | 6.269                          | 3302.36            | 20701.88           | 3.178                          | 2918.38            | 9273.19            |
| A_68_P30362471 | chr15:78633225-78633269                           | NM_130859:226       | Card10     | INSIDE                 | 0.431                                                        | 5.927                          | 1541.26            | 9135.58            | 2.555                          | 1323.75            | 3382.45            |
| A_68_P30362447 | chr15:78629670-78629714                           | NM_130859:3780      | Card10     | INSIDE                 | 0.457                                                        | 3.370                          | 2796.13            | 9424.31            | 1.539                          | 2273.18            | 3498.22            |
| A_68_P30533733 | chr16:8672342-8672386                             | NM_025821:-118      | Carhsp1    | PROMOTER               | 0.379                                                        | 7.778                          | 1553.95            | 12087.18           | 2.95                           | 1323.77            | 3905.44            |
| A_68_P30533728 | chr16:8671819-8671863                             | NM_025821:406       | Carhsp1    | INSIDE                 | 0.345                                                        | 1.476                          | 1275.58            | 1882.89            | 0.509                          | 1037.35            | 527.71             |
| A_68_P25655858 | chr8:11497803-11497847                            | NM_026995:257       | Carkd      | INSIDE                 | 0.174                                                        | 12.010                         | 1776.44            | 21334.48           | 2.094                          | 1509.47            | 3160.60            |
| A_68_P31921521 | chr19:4169457-4169501                             | NM_134148:6001      | Carns1     | INSIDE                 | 0.329                                                        | 4.294                          | 5552.21            | 23842.23           | 1.414                          | 4122.39            | 5827.75            |
| A_68_P29265994 | chr13:100670562-100670606                         | NM_001081493:54     | Cartpt     | INSIDE                 | 0.554                                                        | 0.316                          | 2043.12            | 646.41             | 0.175                          | 1598.14            | 280.18             |
| A_68_P21583235 | chr2:121692691-121692735                          | NM_001205371:-728   | Case4      | PROMOTER               | 0.488                                                        | 4.696                          | 448.75             | 2107.53            | 2.291                          | 450.32             | 1031.53            |



| ProbeName      | Target position of probe on CpG island microarray | TargetID           | GeneSymbol | CpG island Description | Ratio of relative methylation (TiO <sub>2</sub> -NP/Vehicle) | Sham group                     |                    |                    | TiO <sub>2</sub> -H group      |                    |                    |
|----------------|---------------------------------------------------|--------------------|------------|------------------------|--------------------------------------------------------------|--------------------------------|--------------------|--------------------|--------------------------------|--------------------|--------------------|
|                |                                                   |                    |            |                        |                                                              | Relative methylation (Cy5/Cy3) | Cy3 signal (Input) | Cy5 signal (MeDIP) | Relative methylation (Cy5/Cy3) | Cy3 signal (Input) | Cy5 signal (MeDIP) |
| A_68_P21567569 | chr2:118873048-118873092                          | NM_029617:216      | Casc5      | INSIDE                 | 0.077                                                        | 1.474                          | 2170.71            | 3198.98            | 0.114                          | 1590.03            | 180.56             |
| A_68_P21567570 | chr2:118873151-118873195                          | NM_029617:318      | Casc5      | INSIDE                 | 0.46                                                         | 0.682                          | 1303.39            | 888.62             | 0.314                          | 1055.45            | 331.26             |
| A_68_P24205536 | chr6:4550713-4550757                              | NM_145398:-331     | Casd1      | PROMOTER               | 0.238                                                        | 19.764                         | 3734.20            | 73802.51           | 4.702                          | 3521.25            | 16556.29           |
| A_68_P24205537 | chr6:4550857-4550901                              | NM_145398:-187     | Casd1      | PROMOTER               | 0.62                                                         | 0.429                          | 1236.20            | 530.94             | 0.266                          | 935.01             | 248.92             |
| A_68_P32268351 | chrX:13424038-13424082                            | NM_009806:-393     | Cask       | PROMOTER               | 0.227                                                        | 9.986                          | 2767.64            | 27636.57           | 2.271                          | 3519.36            | 7993.94            |
| A_68_P32268349 | chrX:13423877-13423921                            | NM_009806:-231     | Cask       | PROMOTER               | 0.357                                                        | 8.529                          | 1284.59            | 10956.83           | 3.046                          | 1443.95            | 4398.29            |
| A_68_P32268347 | chrX:13423633-13423677                            | NM_009806:13       | Cask       | INSIDE                 | 0.373                                                        | 13.211                         | 2822.78            | 37292.35           | 4.932                          | 3432.33            | 16929.01           |
| A_68_P31097727 | chr17:24642185-24642229                           | NM_027937:16479    | Caskin1    | INSIDE                 | 0.465                                                        | 3.748                          | 3680.84            | 13797.26           | 1.744                          | 2388.98            | 4166.03            |
| A_68_P31097739 | chr17:24643626-24643670                           | NM_027937:17921    | Caskin1    | INSIDE                 | 0.516                                                        | 3.373                          | 3654.46            | 12328.30           | 1.742                          | 2978.67            | 5189.44            |
| A_68_P28155403 | chr11:115664957-115665001                         | NM_080643:9928     | Caskin2    | INSIDE                 | 0.116                                                        | 51.683                         | 3851.38            | 199052.70          | 5.971                          | 3414.85            | 20390.23           |
| A_68_P28155484 | chr11:115675096-115675140                         | NM_080643:-212     | Caskin2    | DIVERGENT_PROMOTER     | 0.659                                                        | 0.184                          | 2911.22            | 535.03             | 0.121                          | 2035.21            | 246.31             |
| A_68_P25837064 | chr8:47702719-47702763                            | NM_009810:-62      | Casp3      | DIVERGENT_PROMOTER     | 0.242                                                        | 30.843                         | 10478.03           | 323173.00          | 7.467                          | 9542.52            | 71256.72           |
| A_68_P25837068 | chr8:47703178-47703222                            | NM_009810:398      | Casp3      | INSIDE                 | 0.646                                                        | 0.504                          | 2655.47            | 1339.09            | 0.326                          | 2158.43            | 702.81             |
| A_68_P22522753 | chr3:129604519-129604563                          | NM_009811:198      | Casp6      | INSIDE                 | 0.483                                                        | 0.148                          | 3498.37            | 518.51             | 0.072                          | 2607.75            | 186.75             |
| A_68_P22522751 | chr3:129604360-129604404                          | NM_009811:40       | Casp6      | INSIDE                 | 0.616                                                        | 0.536                          | 5597.09            | 3002.22            | 0.331                          | 4207.73            | 1391.42            |
| A_68_P23366008 | chr4:141349558-141349602                          | NM_015733:54       | Casp9      | INSIDE                 | 0.067                                                        | 4.905                          | 6740.15            | 33063.28           | 0.328                          | 4783.70            | 1571.08            |
| A_68_P23366010 | chr4:141349732-141349776                          | NM_015733:228      | Casp9      | INSIDE                 | 0.365                                                        | 0.482                          | 1499.60            | 722.50             | 0.176                          | 1214.61            | 213.54             |
| A_68_P23366007 | chr4:141349370-141349414                          | NM_015733:-134     | Casp9      | DIVERGENT_PROMOTER     | 0.451                                                        | 0.310                          | 3229.10            | 1000.06            | 0.14                           | 2405.15            | 335.84             |
| A_68_P29147534 | chr13:74945954-74945998                           | NM_009817:-607     | Cast       | PROMOTER               | 0.347                                                        | 0.544                          | 1148.48            | 624.47             | 0.188                          | 922.89             | 173.92             |
| A_68_P23397281 | chr4:148275240-148275284                          | NM_027195:96762    | Casz1      | INSIDE                 | 0.113                                                        | 62.221                         | 10026.63           | 623866.40          | 7.006                          | 13053.40           | 91449.69           |
| A_68_P23396578 | chr4:148179082-148179126                          | NM_027195:604      | Casz1      | INSIDE                 | 0.282                                                        | 16.237                         | 2330.98            | 37847.73           | 4.581                          | 2146.50            | 9833.67            |
| A_68_P23397279 | chr4:148275001-148275045                          | NM_027195:96522    | Casz1      | INSIDE                 | 0.343                                                        | 18.714                         | 2830.60            | 52972.87           | 6.419                          | 2496.11            | 16022.48           |
| A_68_P23397206 | chr4:148265535-148265579                          | NM_027195:87056    | Casz1      | INSIDE                 | 0.563                                                        | 10.446                         | 2309.00            | 24120.42           | 5.883                          | 1785.34            | 10503.31           |
| A_68_P21760473 | chr2:154262598-154262642                          | NM_009823:401      | Cbfa2t2    | INSIDE                 | 0.662                                                        | 0.438                          | 1125.97            | 492.80             | 0.29                           | 1033.92            | 299.75             |
| A_68_P26235085 | chr8:125202360-125202404                          | NM_001109873:-307  | Cbfa2t3    | PROMOTER               | 0.438                                                        | 9.887                          | 1892.08            | 18706.66           | 4.333                          | 1653.30            | 7163.57            |
| A_68_P26234726 | chr8:125154578-125154622                          | NM_001109873:47475 | Cbfa2t3    | INSIDE                 | 0.625                                                        | 6.238                          | 1790.95            | 11171.09           | 3.897                          | 1539.90            | 6001.03            |
| A_68_P26132023 | chr8:107694748-107694792                          | NM_001161456:197   | Cbfb       | INSIDE                 | 0.472                                                        | 10.615                         | 1666.07            | 17685.84           | 5.006                          | 1702.07            | 8521.19            |
| A_68_P26466435 | chr9:44041858-44041902                            | NM_007619:249      | Cbl1       | INSIDE                 | 0.555                                                        | 14.801                         | 3985.06            | 58984.71           | 8.209                          | 2970.77            | 24387.08           |
| A_68_P30759540 | chr16:52031753-52031797                           | NM_001033238:113   | Cblb       | INSIDE                 | 0.421                                                        | 13.307                         | 3710.77            | 49377.88           | 5.609                          | 3012.13            | 16894.19           |
| A_68_P24995306 | chr7:20382177-20382221                            | NM_001161844:-40   | Cblc       | PROMOTER               | 0.637                                                        | 4.790                          | 3413.87            | 16351.90           | 3.051                          | 2815.22            | 8589.66            |
| A_68_P28331595 | chr12:32184383-32184427                           | NM_134048:1        | Cbl1l1     | INSIDE                 | 0.308                                                        | 1.891                          | 1217.37            | 2301.84            | 0.582                          | 976.33             | 568.47             |
| A_68_P26035029 | chr8:89996288-89996332                            | NM_019626:181      | Cbln1      | INSIDE                 | 0.346                                                        | 8.245                          | 8233.06            | 67885.43           | 2.852                          | 6667.56            | 19014.83           |
| A_68_P26035009 | chr8:89994219-89994263                            | NM_019626:2251     | Cbln1      | INSIDE                 | 0.421                                                        | 0.670                          | 1138.41            | 762.64             | 0.282                          | 884.51             | 249.31             |
| A_68_P31899538 | chr18:86881037-86881081                           | NM_172633:-1381    | Cbln2      | PROMOTER               | 0.218                                                        | 0.495                          | 14701.22           | 7284.10            | 0.108                          | 9135.76            | 988.83             |
| A_68_P30977032 | chr16:93683403-93683447                           | NM_173047:-39      | Cbr3       | PROMOTER               | 0.399                                                        | 0.307                          | 1794.36            | 550.04             | 0.122                          | 1425.61            | 174.42             |
| A_68_P31140911 | chr17:31773548-31773592                           | NM_178224:506      | Cbs        | INSIDE                 | 0.343                                                        | 9.569                          | 7545.38            | 72198.44           | 3.284                          | 5958.84            | 19568.70           |
| A_68_P31140909 | chr17:31773378-31773422                           | NM_178224:676      | Cbs        | INSIDE                 | 0.497                                                        | 0.145                          | 3745.68            | 542.42             | 0.072                          | 2437.82            | 175.54             |
| A_68_P32026831 | chr19:25036147-25036191                           | NM_146097:-62      | Cbwd1      | PROMOTER               | 0.551                                                        | 13.971                         | 3428.72            | 47903.15           | 7.691                          | 2751.79            | 21164.97           |
| A_68_P28175309 | chr11:118884826-118884870                         | NM_007623:506      | Cbx2       | INSIDE                 | 0.373                                                        | 7.120                          | 2113.54            | 15048.18           | 2.656                          | 1759.07            | 4672.64            |
| A_68_P28175304 | chr11:118884168-118884212                         | NM_007623:-152     | Cbx2       | PROMOTER               | 0.372                                                        | 1.860                          | 2495.67            | 4642.92            | 0.692                          | 1929.58            | 1335.67            |
| A_68_P28175799 | chr11:118951917-118951961                         | NM_007625:-4387    | Cbx4       | PROMOTER               | 0.273                                                        | 16.718                         | 3173.58            | 53055.42           | 4.562                          | 2620.64            | 11954.55           |
| A_68_P28175760 | chr11:118947373-118947417                         | NM_007625:157      | Cbx4       | INSIDE                 | 0.481                                                        | 3.596                          | 1634.40            | 5876.52            | 1.728                          | 1386.19            | 2395.25            |
| A_68_P30502976 | chr15:103070313-103070357                         | NM_001076789:-87   | Cbx5       | DIVERGENT_PROMOTER     | 0.356                                                        | 0.401                          | 1628.65            | 653.68             | 0.143                          | 1202.55            | 171.95             |
| A_68_P30369297 | chr15:79762789-79762833                           | NM_144811:266      | Cbx7       | INSIDE                 | 0.211                                                        | 6.583                          | 2145.33            | 14122.82           | 1.391                          | 1786.65            | 2485.08            |
| A_68_P28175418 | chr11:118898955-118898999                         | NM_013926:3251     | Cbx8       | DOWNSTREAM             | 0.149                                                        | 26.134                         | 2385.00            | 62329.48           | 3.888                          | 2077.18            | 8075.80            |
| A_68_P28175453 | chr11:118902817-118902861                         | NM_013926:-611     | Cbx8       | PROMOTER               | 0.485                                                        | 0.293                          | 6059.96            | 1773.44            | 0.142                          | 4110.36            | 583.40             |

| ProbeName      | Target position of probe on CpG island microarray | TargetID           | GeneSymbol | CpG island Description | Ratio of relative methylation (TiO <sub>2</sub> -NP/Vehicle) | Sham group                     |                    |                    | TiO <sub>2</sub> -H group      |                    |                    |
|----------------|---------------------------------------------------|--------------------|------------|------------------------|--------------------------------------------------------------|--------------------------------|--------------------|--------------------|--------------------------------|--------------------|--------------------|
|                |                                                   |                    |            |                        |                                                              | Relative methylation (Cy5/Cy3) | Cy3 signal (Input) | Cy5 signal (MeDIP) | Relative methylation (Cy5/Cy3) | Cy3 signal (Input) | Cy5 signal (MeDIP) |
| A_68_P28175448 | chr11:118902325-118902369                         | NM_013926:-119     | Cbx8       | PROMOTER               | 0.497                                                        | 0.428                          | 2146.70            | 918.52             | 0.213                          | 1664.57            | 353.73             |
| A_68_P23196907 | chr4:108292428-108292472                          | NM_177045:-110     | Ce2d1b     | PROMOTER               | 0.482                                                        | 3.031                          | 2916.57            | 8840.55            | 1.461                          | 2472.26            | 3612.47            |
| A_68_P27275484 | chr10:78215712-78215756                           | NM_027630:78       | Ccdc105    | INSIDE                 | 0.497                                                        | 0.267                          | 2049.61            | 546.79             | 0.133                          | 1516.22            | 201.07             |
| A_68_P24951826 | chr7:5008661-5008708                              | NM_146178:357      | Ccdc106    | INSIDE                 | 0.468                                                        | 4.262                          | 1160.24            | 4944.85            | 1.993                          | 1084.85            | 2162.22            |
| A_68_P22871971 | chr4:43506143-43506188                            | NM_001037913:-71   | Ccdc107    | DIVERGENT_PROMOTER     | 0.645                                                        | 3.983                          | 415.50             | 1654.94            | 2.569                          | 357.08             | 917.49             |
| A_68_P27169799 | chr10:59079055-59079099                           | NM_001033259:364   | Ccdc109a   | INSIDE                 | 0.398                                                        | 3.955                          | 2326.99            | 9202.87            | 1.573                          | 1818.97            | 2861.44            |
| A_68_P22523142 | chr3:129672517-129672561                          | NM_025779:586      | Ccdc109b   | INSIDE                 | 0.592                                                        | 0.222                          | 2993.04            | 662.98             | 0.131                          | 1996.02            | 261.93             |
| A_68_P27563898 | chr11:5441853-5441897                             | NM_134033:346      | Ccdc117    | INSIDE                 | 0.233                                                        | 20.820                         | 3486.46            | 72587.90           | 4.847                          | 3399.03            | 16476.63           |
| A_68_P25954611 | chr8:73392845-73392889                            | NM_026964:4523     | Ccdc124    | INSIDE                 | 0.557                                                        | 0.425                          | 1275.38            | 542.31             | 0.237                          | 937.43             | 222.15             |
| A_68_P25954643 | chr8:73397351-73397395                            | NM_026964:17       | Ccdc124    | INSIDE                 | 0.518                                                        | 3.206                          | 1845.85            | 5918.70            | 1.661                          | 1724.20            | 2864.54            |
| A_68_P29269562 | chr13:101439843-101439887                         | NM_001168386:429   | Ccdc125    | INSIDE                 | 0.496                                                        | 0.496                          | 1589.91            | 788.30             | 0.246                          | 1131.66            | 278.50             |
| A_68_P24432030 | chr6:49269309-49269353                            | NM_175098:-21      | Ccdc126    | PROMOTER               | 0.351                                                        | 0.388                          | 1521.98            | 590.86             | 0.136                          | 1293.29            | 176.44             |
| A_68_P29145780 | chr13:74487726-74487770                           | NM_001168659:-16   | Ccdc127    | DIVERGENT_PROMOTER     | 0.541                                                        | 2.905                          | 1985.93            | 5769.66            | 1.571                          | 1558.11            | 2447.60            |
| A_68_P26885916 | chr9:121748253-121748297                          | NM_028384:305      | Ccdc13     | INSIDE                 | 0.228                                                        | 0.255                          | 6163.35            | 1573.52            | 0.058                          | 4100.58            | 239.07             |
| A_68_P26885915 | chr9:121748176-121748220                          | NM_028384:381      | Ccdc13     | INSIDE                 | 0.363                                                        | 0.283                          | 4503.55            | 1275.96            | 0.103                          | 3160.95            | 324.67             |
| A_68_P26019095 | chr8:86794255-86794299                            | NM_026350:-17      | Ccdc130    | PROMOTER               | 0.497                                                        | 5.703                          | 3479.83            | 19846.75           | 2.836                          | 2715.11            | 7699.81            |
| A_68_P26019094 | chr8:86794146-86794190                            | NM_026350:91       | Ccdc130    | INSIDE                 | 0.584                                                        | 0.457                          | 2592.46            | 1184.17            | 0.267                          | 1842.21            | 491.12             |
| A_68_P24326230 | chr6:29353006-29353050                            | NM_001201378:4103  | Ccdc136    | INSIDE                 | 0.557                                                        | 0.307                          | 1471.97            | 451.39             | 0.171                          | 1150.34            | 196.32             |
| A_68_P24326231 | chr6:29353130-29353174                            | NM_001201378:4227  | Ccdc136    | INSIDE                 | 0.133                                                        | 2.503                          | 644.18             | 1612.65            | 0.333                          | 604.73             | 201.15             |
| A_68_P26430110 | chr9:37155994-37156038                            | NM_001081429:-39   | Ccdc15     | PROMOTER               | 0.206                                                        | 27.621                         | 3467.04            | 95762.28           | 5.685                          | 2909.00            | 16538.62           |
| A_68_P23895412 | chr5:93104159-93104203                            | NM_177230:-27      | Ccdc158    | DIVERGENT_PROMOTER     | 0.482                                                        | 4.788                          | 3379.51            | 16182.36           | 2.307                          | 3114.85            | 7184.88            |
| A_68_P23895413 | chr5:93104248-93104292                            | NM_177230:-117     | Ccdc158    | DIVERGENT_PROMOTER     | 0.6                                                          | 0.688                          | 2316.34            | 1594.44            | 0.413                          | 1801.41            | 743.68             |
| A_68_P23244137 | chr4:118868027-118868071                          | NM_001038998:-81   | Ccdc23     | PROMOTER               | 0.485                                                        | 0.377                          | 1163.43            | 438.78             | 0.183                          | 955.23             | 174.60             |
| A_68_P20972053 | chr2:5058960-5059004                              | NM_028804:161      | Ccdc3      | INSIDE                 | 0.469                                                        | 8.766                          | 736.00             | 6451.89            | 4.108                          | 633.18             | 2600.93            |
| A_68_P23245371 | chr4:119087718-119087764                          | NM_029286:386      | Ccdc30     | INSIDE                 | 0.576                                                        | 0.465                          | 1765.93            | 820.50             | 0.268                          | 1248.51            | 334.40             |
| A_68_P23245376 | chr4:119088209-119088253                          | NM_029286:-104     | Ccdc30     | PROMOTER               | 0.584                                                        | 0.594                          | 1005.50            | 597.24             | 0.347                          | 729.01             | 252.83             |
| A_68_P27360778 | chr10:94151506-94151550                           | NM_029852:-6       | Ccdc41     | DIVERGENT_PROMOTER     | 0.353                                                        | 0.382                          | 1690.13            | 645.39             | 0.135                          | 1347.93            | 181.74             |
| A_68_P24039940 | chr5:121081339-121081383                          | NM_001195094:2884  | Ccdc42b    | INSIDE                 | 0.068                                                        | 24.354                         | 753.42             | 18348.84           | 1.655                          | 659.49             | 1091.56            |
| A_68_P30625227 | chr16:27388952-27388996                           | NM_001025615:-88   | Ccdc50     | PROMOTER               | 0.515                                                        | 12.389                         | 939.46             | 11638.90           | 6.376                          | 975.94             | 6223.10            |
| A_68_P28187622 | chr11:120794046-120794090                         | NM_027745:118      | Ccdc57     | INSIDE                 | 0.63                                                         | 0.525                          | 1146.10            | 601.95             | 0.331                          | 993.50             | 328.95             |
| A_68_P27228310 | chr10:69651858-69651902                           | NM_001111121:92012 | Ccdc6      | INSIDE                 | 0.173                                                        | 25.208                         | 7326.43            | 184685.90          | 4.356                          | 6203.63            | 27025.55           |
| A_68_P27227733 | chr10:69559705-69559749                           | NM_001111121:-142  | Ccdc6      | PROMOTER               | 0.332                                                        | 9.035                          | 2724.54            | 24614.93           | 3.001                          | 4232.76            | 12702.41           |
| A_68_P24990327 | chr7:19479355-19479399                            | NM_001033314:16377 | Ccdc61     | INSIDE                 | 0.387                                                        | 7.815                          | 3955.08            | 30907.87           | 3.027                          | 3697.43            | 11193.44           |
| A_68_P24990324 | chr7:19479119-19479163                            | NM_001033314:16613 | Ccdc61     | INSIDE                 | 0.514                                                        | 0.601                          | 3842.74            | 2310.42            | 0.309                          | 2732.57            | 843.89             |
| A_68_P24990326 | chr7:19479287-19479331                            | NM_001033314:16445 | Ccdc61     | INSIDE                 | 0.526                                                        | 3.244                          | 1504.28            | 4879.52            | 1.707                          | 1232.07            | 2102.82            |
| A_68_P24010911 | chr5:116112644-116112688                          | NM_001080808:68902 | Ccdc64     | INSIDE                 | 0.578                                                        | 4.196                          | 4301.05            | 18048.58           | 2.425                          | 3534.14            | 8570.08            |
| A_68_P24011288 | chr5:116182625-116182669                          | NM_001080808:-1078 | Ccdc64     | PROMOTER               | 0.61                                                         | 0.446                          | 2256.61            | 1006.15            | 0.272                          | 1874.67            | 509.67             |
| A_68_P26323901 | chr9:15432521-15432565                            | NM_181816:-165     | Ccdc67     | PROMOTER               | 0.651                                                        | 0.550                          | 2745.25            | 1511.18            | 0.358                          | 2009.38            | 719.62             |
| A_68_P26323900 | chr9:15432364-15432408                            | NM_181816:-9       | Ccdc67     | PROMOTER               | 0.495                                                        | 3.332                          | 1354.14            | 4511.35            | 1.648                          | 1072.75            | 1767.86            |
| A_68_P26814990 | chr9:108363250-108363294                          | NM_133744:424      | Ccdc71     | INSIDE                 | 0.366                                                        | 5.833                          | 1660.21            | 9683.95            | 2.137                          | 1517.96            | 3244.18            |
| A_68_P26814987 | chr9:108362953-108362997                          | NM_133744:126      | Ccdc71     | INSIDE                 | 0.547                                                        | 4.661                          | 2033.19            | 9476.11            | 2.551                          | 1877.30            | 4789.36            |
| A_68_P26818181 | chr9:108984890-108984934                          | NM_183250:-17      | Ccdc72     | DIVERGENT_PROMOTER     | 0.429                                                        | 0.620                          | 2809.12            | 1741.26            | 0.266                          | 2081.09            | 553.09             |
| A_68_P31373927 | chr17:79234917-79234961                           | NM_181649:83       | Ccdc75     | INSIDE                 | 0.487                                                        | 4.735                          | 2154.94            | 10203.52           | 2.308                          | 1725.04            | 3981.10            |
| A_68_P26128839 | chr8:107033201-107033245                          | NM_180958:565      | Ccdc79     | INSIDE                 | 0.599                                                        | 0.464                          | 1465.05            | 679.23             | 0.278                          | 1255.27            | 348.39             |
| A_68_P31928777 | chr19:5457059-5457103                             | NM_198616:469      | Ccdc85b    | INSIDE                 | 0.292                                                        | 7.028                          | 1482.47            | 10418.41           | 2.049                          | 1227.97            | 2515.82            |
| A_68_P28727039 | chr12:109513784-109513828                         | NM_001159910:-179  | Ccdc85c    | PROMOTER               | 0.392                                                        | 5.774                          | 3140.62            | 18133.62           | 2.262                          | 2653.89            | 6001.80            |

| ProbeName      | Target position of probe on CpG island microarray | TargetID           | GeneSymbol | CpG island Description | Ratio of relative methylation (TiO <sub>2</sub> -NP/Vehicle) | Sham group                     |                    |                    | TiO <sub>2</sub> -H group      |                    |                    |
|----------------|---------------------------------------------------|--------------------|------------|------------------------|--------------------------------------------------------------|--------------------------------|--------------------|--------------------|--------------------------------|--------------------|--------------------|
|                |                                                   |                    |            |                        |                                                              | Relative methylation (Cy5/Cy3) | Cy3 signal (Input) | Cy5 signal (MeDIP) | Relative methylation (Cy5/Cy3) | Cy3 signal (Input) | Cy5 signal (MeDIP) |
| A_68_P27674147 | chr11:29273422-29273466                           | NM_176841:-330     | Ccdc88a    | PROMOTER               | 0.479                                                        | 4.947                          | 1109.54            | 5488.48            | 2.367                          | 1009.48            | 2389.40            |
| A_68_P31936460 | chr19:6930124-6930168                             | NM_001081291:2555  | Ccdc88b    | INSIDE                 | 0.584                                                        | 0.574                          | 2893.46            | 1661.21            | 0.335                          | 1958.32            | 656.15             |
| A_68_P31936459 | chr19:6930056-6930100                             | NM_001081291:2623  | Ccdc88b    | INSIDE                 | 0.629                                                        | 0.588                          | 1085.10            | 638.52             | 0.37                           | 879.97             | 325.73             |
| A_68_P24980671 | chr7:16871769-16871813                            | NM_172297:-1782    | Ccdc9      | PROMOTER               | 0.361                                                        | 10.864                         | 14817.86           | 160981.80          | 3.926                          | 13212.72           | 51872.48           |
| A_68_P24980670 | chr7:16871649-16871693                            | NM_172297:-1662    | Ccdc9      | PROMOTER               | 0.413                                                        | 7.715                          | 11203.84           | 86442.65           | 3.187                          | 8016.24            | 25548.44           |
| A_68_P24980698 | chr7:16881008-16881052                            | NM_001136471:-8886 | Ccdc9      | PROMOTER               | 0.646                                                        | 3.116                          | 1777.56            | 5539.41            | 2.014                          | 1404.98            | 2829.57            |
| A_68_P24980672 | chr7:16871856-16871900                            | NM_172297:-1870    | Ccdc9      | PROMOTER               | 0.477                                                        | 2.959                          | 5333.39            | 15780.43           | 1.413                          | 3948.89            | 5578.36            |
| A_68_P28990871 | chr13:43655098-43655142                           | NM_001081059:440   | Ccdc90a    | INSIDE                 | 0.303                                                        | 13.986                         | 2235.46            | 31265.27           | 4.239                          | 1929.19            | 8178.79            |
| A_68_P25325434 | chr7:99709780-99709824                            | NM_001162918:144   | Ccdc90b    | INSIDE                 | 0.653                                                        | 0.453                          | 1004.58            | 455.14             | 0.296                          | 836.63             | 247.42             |
| A_68_P23607908 | chr5:36827600-36827644                            | NM_025725:386      | Ccdc96     | INSIDE                 | 0.309                                                        | 8.693                          | 2401.12            | 20872.68           | 2.684                          | 1947.52            | 5227.38            |
| A_68_P31159491 | chr17:35654099-35654143                           | NM_146248:60       | Ccher1     | INSIDE                 | 0.182                                                        | 2.593                          | 4192.98            | 10874.03           | 0.473                          | 3258.21            | 1540.12            |
| A_68_P26883806 | chr9:121403762-121403806                          | NM_031161:1023     | Cck        | INSIDE                 | 0.347                                                        | 0.228                          | 2930.28            | 666.73             | 0.079                          | 2168.82            | 171.22             |
| A_68_P26883804 | chr9:121403538-121403582                          | NM_031161:1247     | Cck        | INSIDE                 | 0.664                                                        | 5.614                          | 909.60             | 5106.55            | 3.726                          | 820.06             | 3055.25            |
| A_68_P25392270 | chr7:112574421-112574465                          | NM_007627:109      | Cckbr      | INSIDE                 | 0.36                                                         | 8.073                          | 5714.55            | 46136.01           | 2.906                          | 5389.95            | 15660.66           |
| A_68_P22058858 | chr3:36470838-36470882                            | NM_009828:58       | Ccna2      | INSIDE                 | 0.573                                                        | 3.758                          | 1319.64            | 4958.88            | 2.152                          | 1092.56            | 2351.43            |
| A_68_P25610226 | chr7:152128254-152128298                          | NM_007631:-2446    | Ccnd1      | PROMOTER               | 0.394                                                        | 0.342                          | 1709.92            | 584.89             | 0.135                          | 1401.45            | 188.96             |
| A_68_P24831080 | chr6:127105235-127105279                          | NM_009829:-4190    | Ccnd2      | PROMOTER               | 0.641                                                        | 0.525                          | 1828.51            | 960.50             | 0.337                          | 1447.77            | 487.82             |
| A_68_P25065442 | chr7:38892952-38892996                            | NM_007633:-465     | Ccne1      | PROMOTER               | 0.273                                                        | 0.333                          | 4859.22            | 1616.16            | 0.091                          | 3335.73            | 303.30             |
| A_68_P25065437 | chr7:38892310-38892354                            | NM_007633:177      | Ccne1      | INSIDE                 | 0.527                                                        | 3.989                          | 656.80             | 2619.82            | 2.102                          | 583.77             | 1226.87            |
| A_68_P25065443 | chr7:38893032-38893076                            | NM_007633:-545     | Ccne1      | PROMOTER               | 0.293                                                        | 5.204                          | 2991.07            | 15565.60           | 1.522                          | 2550.17            | 3881.83            |
| A_68_P22728457 | chr4:11118468-11118512                            | NM_001037134:-10   | Ccne2      | PROMOTER               | 0.527                                                        | 4.653                          | 878.77             | 4088.81            | 2.454                          | 823.02             | 2019.50            |
| A_68_P22728462 | chr4:11118987-11119031                            | NM_009830:153      | Ccne2      | INSIDE                 | 0.57                                                         | 0.194                          | 3866.07            | 749.55             | 0.111                          | 2766.40            | 305.72             |
| A_68_P22728452 | chr4:11117767-11117811                            | NM_001037134:-712  | Ccne2      | PROMOTER               | 0.607                                                        | 3.863                          | 362.98             | 1402.22            | 2.343                          | 399.51             | 936.23             |
| A_68_P31096346 | chr17:24388277-24388321                           | NM_007634:56       | Ccnf       | INSIDE                 | 0.595                                                        | 4.483                          | 686.09             | 3075.56            | 2.667                          | 593.17             | 1581.70            |
| A_68_P27737179 | chr11:40568476-40568520                           | NM_009831:290      | Ccng1      | INSIDE                 | 0.533                                                        | 0.613                          | 2213.17            | 1357.12            | 0.327                          | 1647.11            | 538.56             |
| A_68_P23898892 | chr5:93697057-93697101                            | NM_007635:480      | Ccng2      | INSIDE                 | 0.417                                                        | 0.485                          | 1026.88            | 498.10             | 0.202                          | 861.04             | 173.98             |
| A_68_P32111328 | chr19:40905903-40905947                           | NM_172839:156      | Ccnj       | INSIDE                 | 0.497                                                        | 3.950                          | 878.96             | 3471.52            | 1.963                          | 727.60             | 1428.04            |
| A_68_P27750951 | chr11:43342144-43342188                           | NM_001045530:-119  | Ccnj1      | PROMOTER               | 0.636                                                        | 0.607                          | 1087.73            | 659.80             | 0.386                          | 789.90             | 304.69             |
| A_68_P28726332 | chr12:109418289-109418333                         | NM_009832:363      | Ccnk       | INSIDE                 | 0.244                                                        | 1.459                          | 3104.04            | 4528.40            | 0.356                          | 2274.37            | 810.80             |
| A_68_P23440734 | chr4:155186580-155186624                          | NM_207678:5        | Ccnl2      | INSIDE                 | 0.375                                                        | 0.710                          | 2338.97            | 1660.29            | 0.266                          | 1877.72            | 500.10             |
| A_68_P29338034 | chr13:11377821-11377865                           | NM_001081062:-167  | Ccno       | PROMOTER               | 0.21                                                         | 12.664                         | 650.52             | 8238.12            | 2.661                          | 524.42             | 1395.62            |
| A_68_P29338038 | chr13:113778161-113778205                         | NM_001081062:173   | Ccno       | INSIDE                 | 0.514                                                        | 2.793                          | 3745.76            | 10462.30           | 1.437                          | 2778.15            | 3992.09            |
| A_68_P31485630 | chr18:9450058-9450102                             | NM_026484:68       | Ccny       | INSIDE                 | 0.574                                                        | 0.476                          | 1295.01            | 616.89             | 0.273                          | 1080.90            | 295.51             |
| A_68_P22128529 | chr3:51028612-51028656                            | NM_009834:266      | Ccm4l      | INSIDE                 | 0.514                                                        | 0.184                          | 4699.41            | 866.18             | 0.095                          | 3352.62            | 317.37             |
| A_68_P27479232 | chr10:116500293-116500343                         | NM_007636:552      | Cct2       | INSIDE                 | 0.572                                                        | 0.360                          | 2540.58            | 915.60             | 0.206                          | 1176.36            | 242.67             |
| A_68_P30115244 | chr15:31531241-31531285                           | NM_007637:297      | Cct5       | INSIDE                 | 0.421                                                        | 0.547                          | 879.47             | 480.64             | 0.23                           | 737.90             | 169.81             |
| A_68_P30940063 | chr16:87495606-87495650                           | NM_009840:486      | Cct8       | INSIDE                 | 0.627                                                        | 0.353                          | 3684.44            | 1300.97            | 0.221                          | 2708.06            | 599.48             |
| A_68_P25589026 | chr7:148653744-148653788                          | NM_001111050:-921  | Cd151      | PROMOTER               | 0.059                                                        | 7.390                          | 4167.77            | 30798.43           | 0.438                          | 3076.08            | 1346.02            |
| A_68_P25589027 | chr7:148653834-148653878                          | NM_001111050:-831  | Cd151      | PROMOTER               | 0.483                                                        | 0.515                          | 2250.51            | 1158.54            | 0.249                          | 1771.81            | 440.45             |
| A_68_P23316407 | chr4:132776804-132776848                          | NM_027152:103      | Cd164l2    | INSIDE                 | 0.37                                                         | 0.669                          | 1039.43            | 695.64             | 0.247                          | 721.83             | 178.52             |
| A_68_P20796837 | chr1:167775393-167775437                          | NM_001113391:56603 | Cd247      | INSIDE                 | 0.12                                                         | 18.000                         | 1104.23            | 19876.30           | 2.154                          | 1003.28            | 2160.81            |
| A_68_P20796835 | chr1:167775162-167775206                          | NM_001113391:56373 | Cd247      | INSIDE                 | 0.414                                                        | 8.362                          | 1485.67            | 12422.73           | 3.463                          | 1267.50            | 4388.74            |
| A_68_P27101043 | chr10:43298385-43298429                           | NM_009846:-568     | Cd24a      | PROMOTER               | 0.395                                                        | 0.489                          | 1033.22            | 504.97             | 0.193                          | 889.71             | 171.76             |
| A_68_P27101048 | chr10:43299118-43299162                           | NM_009846:166      | Cd24a      | INSIDE                 | 0.622                                                        | 0.233                          | 3236.69            | 755.25             | 0.145                          | 2227.95            | 323.47             |
| A_68_P31186623 | chr17:43013598-43013642                           | NM_009847:-247     | Cd2ap      | PROMOTER               | 0.563                                                        | 0.345                          | 1526.77            | 527.30             | 0.194                          | 1197.35            | 232.78             |
| A_68_P31186620 | chr17:43013150-43013194                           | NM_009847:201      | Cd2ap      | INSIDE                 | 0.527                                                        | 2.947                          | 1257.95            | 3706.65            | 1.553                          | 1080.15            | 1676.95            |

| ProbeName      | Target position of probe on CpG island microarray | TargetID           | GeneSymbol | CpG island Description | Ratio of relative methylation (TiO <sub>2</sub> -NP/Vehicle) | Sham group                     |                    |                    | TiO <sub>2</sub> -H group      |                    |                    |
|----------------|---------------------------------------------------|--------------------|------------|------------------------|--------------------------------------------------------------|--------------------------------|--------------------|--------------------|--------------------------------|--------------------|--------------------|
|                |                                                   |                    |            |                        |                                                              | Relative methylation (Cy5/Cy3) | Cy3 signal (Input) | Cy5 signal (MeDIP) | Relative methylation (Cy5/Cy3) | Cy3 signal (Input) | Cy5 signal (MeDIP) |
| A_68_P25092032 | chr7:52496418-52496462                            | NM_007645:-2231    | Cd37       | PROMOTER               | 0.666                                                        | 0.559                          | 3359.05            | 1877.54            | 0.372                          | 2468.76            | 918.51             |
| A_68_P25091980 | chr7:52489623-52489667                            | NM_007645:4565     | Cd37       | INSIDE                 | 0.655                                                        | 0.555                          | 989.64             | 549.53             | 0.364                          | 886.38             | 322.47             |
| A_68_P24992859 | chr7:19945635-19945679                            | NM_145822:-824     | Cd3eap     | DIVERGENT_PROMOTER     | 0.653                                                        | 0.211                          | 4122.28            | 871.61             | 0.138                          | 2873.59            | 396.66             |
| A_68_P30747800 | chr16:49855504-49855548                           | NM_010581:-240     | Cd47       | PROMOTER               | 0.572                                                        | 3.428                          | 1292.12            | 4429.87            | 1.961                          | 1013.50            | 1987.94            |
| A_68_P27543827 | chr10:128347191-128347235                         | NM_007653:291      | Cd63       | INSIDE                 | 0.454                                                        | 4.299                          | 1509.24            | 6488.79            | 1.951                          | 1296.20            | 2528.32            |
| A_68_P27543825 | chr10:128346978-128347022                         | NM_007653:79       | Cd63       | INSIDE                 | 0.361                                                        | 1.704                          | 2333.40            | 3975.04            | 0.614                          | 1963.80            | 1206.44            |
| A_68_P30686262 | chr16:38483294-38483338                           | NM_009855:24304    | Cd80       | INSIDE                 | 0.514                                                        | 7.392                          | 3062.56            | 22637.71           | 3.8                            | 2493.30            | 9474.79            |
| A_68_P25598323 | chr7:150238635-150238679                          | NM_133655:2        | Cd81       | INSIDE                 | 0.532                                                        | 6.242                          | 386.41             | 2412.08            | 3.32                           | 362.85             | 1204.51            |
| A_68_P24820868 | chr6:125444847-125444891                          | NM_007657:-95      | Cd9        | PROMOTER               | 0.459                                                        | 26.279                         | 5690.53            | 149540.00          | 12.074                         | 7609.79            | 91882.67           |
| A_68_P24820864 | chr6:125444507-125444551                          | NM_007657:245      | Cd9        | INSIDE                 | 0.521                                                        | 6.191                          | 907.75             | 5620.08            | 3.227                          | 901.39             | 2908.97            |
| A_68_P22449315 | chr3:116126619-116126663                          | NM_001080818:310   | Cdc14a     | INSIDE                 | 0.533                                                        | 5.472                          | 1489.96            | 8153.58            | 2.917                          | 1226.62            | 3578.24            |
| A_68_P22449313 | chr3:116126350-116126394                          | NM_001080818:578   | Cdc14a     | INSIDE                 | 0.557                                                        | 0.637                          | 1434.25            | 912.91             | 0.355                          | 1164.73            | 413.22             |
| A_68_P23240388 | chr4:118109735-118109779                          | NM_023223:192      | Cdc20      | INSIDE                 | 0.619                                                        | 0.273                          | 5585.23            | 1524.87            | 0.169                          | 3794.64            | 641.15             |
| A_68_P31613997 | chr18:34810920-34810964                           | NM_178347:448      | Cdc23      | INSIDE                 | 0.352                                                        | 0.412                          | 1752.57            | 722.74             | 0.145                          | 1560.33            | 226.36             |
| A_68_P26820784 | chr9:109778541-109778586                          | NM_007658:481      | Cdc25a     | INSIDE                 | 0.425                                                        | 17.380                         | 2365.59            | 41115.08           | 7.388                          | 1995.59            | 14742.55           |
| A_68_P27278225 | chr10:79144473-79144517                           | NM_177613:-445     | Cdc34      | PROMOTER               | 0.476                                                        | 4.379                          | 4875.81            | 21348.99           | 2.082                          | 3914.81            | 8151.45            |
| A_68_P32050470 | chr19:29065341-29065385                           | NM_025950:379      | Cdc37l1    | INSIDE                 | 0.605                                                        | 0.620                          | 2162.05            | 1340.60            | 0.375                          | 1677.16            | 629.58             |
| A_68_P23339475 | chr4:136913438-136913482                          | NM_009861:192      | Cdc42      | INSIDE                 | 0.338                                                        | 14.872                         | 1054.36            | 15680.34           | 5.027                          | 971.82             | 4885.68            |
| A_68_P23339476 | chr4:136913526-136913570                          | NM_009861:104      | Cdc42      | INSIDE                 | 0.654                                                        | 2.377                          | 1491.88            | 3546.36            | 1.555                          | 1398.63            | 2175.23            |
| A_68_P20872965 | chr1:181889796-181889840                          | NM_001033285:-1401 | Cdc42bpa   | PROMOTER               | 0.351                                                        | 4.311                          | 2450.33            | 10563.90           | 1.511                          | 1967.65            | 2973.95            |
| A_68_P31933852 | chr19:6306118-6306162                             | NM_001033342:-316  | Cdc42bpg   | PROMOTER               | 0.491                                                        | 0.234                          | 2121.03            | 495.85             | 0.115                          | 1501.11            | 172.31             |
| A_68_P31933966 | chr19:6320610-6320654                             | NM_001033342:14176 | Cdc42bpg   | INSIDE                 | 0.318                                                        | 5.682                          | 1423.34            | 8087.09            | 1.804                          | 1139.14            | 2055.39            |
| A_68_P31933965 | chr19:6320530-6320574                             | NM_001033342:14096 | Cdc42bpg   | INSIDE                 | 0.56                                                         | 3.195                          | 1454.39            | 4646.89            | 1.788                          | 1264.07            | 2260.50            |
| A_68_P30362680 | chr15:78673148-78673192                           | NM_027219:94       | Cdc42ep1   | INSIDE                 | 0.185                                                        | 21.208                         | 2000.45            | 42424.52           | 3.915                          | 1746.07            | 6835.79            |
| A_68_P31376860 | chr17:79754832-79754876                           | NM_026514:-423     | Cdc42ep3   | PROMOTER               | 0.431                                                        | 0.407                          | 1251.37            | 509.71             | 0.176                          | 985.52             | 172.97             |
| A_68_P31376853 | chr17:79753911-79753955                           | NM_026514:499      | Cdc42ep3   | INSIDE                 | 0.523                                                        | 3.250                          | 1005.60            | 3268.66            | 1.699                          | 839.90             | 1426.73            |
| A_68_P28143851 | chr11:113612678-113612722                         | NM_020006:-226     | Cdc42ep4   | PROMOTER               | 0.514                                                        | 8.991                          | 4385.41            | 39430.38           | 4.617                          | 3546.03            | 16372.77           |
| A_68_P28143856 | chr11:113613201-113613245                         | NM_001163346:-93   | Cdc42ep4   | PROMOTER               | 0.66                                                         | 0.491                          | 1406.11            | 689.81             | 0.324                          | 1047.42            | 339.26             |
| A_68_P22342938 | chr3:95032702-95032746                            | NM_001038708:-149  | Cdc42se1   | PROMOTER               | 0.663                                                        | 2.848                          | 1100.87            | 3135.17            | 1.888                          | 937.60             | 1770.38            |
| A_68_P27812111 | chr11:54600916-54600960                           | NM_178626:267      | Cdc42se2   | INSIDE                 | 0.328                                                        | 5.216                          | 2804.37            | 14627.08           | 1.711                          | 2302.70            | 3939.43            |
| A_68_P27812114 | chr11:54601209-54601253                           | NM_178626:-25      | Cdc42se2   | PROMOTER               | 0.539                                                        | 4.465                          | 997.07             | 4451.71            | 2.408                          | 827.03             | 1991.58            |
| A_68_P28059222 | chr11:98768831-98768880                           | NM_001025779:-347  | Cdc6       | PROMOTER               | 0.212                                                        | 33.015                         | 930.06             | 30706.19           | 6.984                          | 733.74             | 5124.76            |
| A_68_P28059225 | chr11:98769164-98769211                           | NM_001025779:-15   | Cdc6       | PROMOTER               | 0.399                                                        | 0.231                          | 2752.88            | 635.61             | 0.092                          | 1885.97            | 173.69             |
| A_68_P28059228 | chr11:98769471-98769515                           | NM_011799:28       | Cdc6       | INSIDE                 | 0.562                                                        | 0.637                          | 1752.48            | 1115.90            | 0.358                          | 1350.98            | 483.61             |
| A_68_P28059227 | chr11:98769369-98769413                           | NM_011799:-74      | Cdc6       | PROMOTER               | 0.453                                                        | 0.710                          | 6916.39            | 4913.34            | 0.321                          | 4454.01            | 1431.93            |
| A_68_P20679676 | chr1:145549881-145549925                          | NM_145991:-88      | Cdc73      | PROMOTER               | 0.548                                                        | 2.746                          | 5752.63            | 15798.02           | 1.505                          | 4632.51            | 6971.16            |
| A_68_P29686792 | chr14:68333571-68333615                           | NM_001110162:75    | Cdca2      | INSIDE                 | 0.25                                                         | 1.937                          | 1125.23            | 2180.10            | 0.484                          | 821.03             | 397.13             |
| A_68_P28752830 | chr12:114067331-114067375                         | NM_028023:248      | Cdca4      | INSIDE                 | 0.188                                                        | 16.274                         | 2183.85            | 35541.00           | 3.06                           | 2091.31            | 6399.79            |
| A_68_P28752833 | chr12:114067608-114067652                         | NM_028023:-30      | Cdca4      | PROMOTER               | 0.369                                                        | 10.480                         | 2450.53            | 25682.27           | 3.862                          | 1738.53            | 6714.91            |
| A_68_P28752835 | chr12:114067766-114067810                         | NM_028023:-188     | Cdca4      | PROMOTER               | 0.657                                                        | 0.434                          | 2299.02            | 997.81             | 0.285                          | 1869.73            | 533.55             |
| A_68_P28776182 | chr12:119082285-119082329                         | NM_146040:-27      | Cdca7l     | PROMOTER               | 0.387                                                        | 0.274                          | 2056.70            | 563.73             | 0.106                          | 1619.28            | 171.96             |
| A_68_P28776180 | chr12:119082034-119082078                         | NM_146040:-277     | Cdca7l     | PROMOTER               | 0.092                                                        | 2.647                          | 802.03             | 2122.87            | 0.243                          | 720.63             | 174.94             |
| A_68_P26140461 | chr8:109127454-109127498                          | NM_009864:209      | Cdh1       | INSIDE                 | 0.658                                                        | 0.609                          | 1983.81            | 1207.66            | 0.4                            | 1453.56            | 582.14             |
| A_68_P26119098 | chr8:105308180-105308224                          | NM_009866:809      | Cdh11      | INSIDE                 | 0.378                                                        | 4.053                          | 8546.02            | 34639.65           | 1.532                          | 6024.20            | 9231.03            |
| A_68_P26236514 | chr8:125394402-125394446                          | NM_007662:22151    | Cdh15      | DOWNSTREAM             | 0.508                                                        | 4.945                          | 1768.69            | 8746.63            | 2.511                          | 1443.29            | 3624.49            |
| A_68_P26236513 | chr8:125394326-125394370                          | NM_007662:22075    | Cdh15      | DOWNSTREAM             | 0.203                                                        | 2.320                          | 1644.43            | 3814.66            | 0.47                           | 1153.66            | 542.63             |

| ProbeName      | Target position of probe on CpG island microarray | TargetID           | GeneSymbol | CpG island Description | Ratio of relative methylation (TiO <sub>2</sub> -NP/Vehicle) | Sham group                     |                    |                    | TiO <sub>2</sub> -H group      |                    |                    |
|----------------|---------------------------------------------------|--------------------|------------|------------------------|--------------------------------------------------------------|--------------------------------|--------------------|--------------------|--------------------------------|--------------------|--------------------|
|                |                                                   |                    |            |                        |                                                              | Relative methylation (Cy5/Cy3) | Cy3 signal (Input) | Cy5 signal (MeDIP) | Relative methylation (Cy5/Cy3) | Cy3 signal (Input) | Cy5 signal (MeDIP) |
| A_68_P31524836 | chr18:16965652-16965696                           | NM_007664:1884     | Cdh2       | INSIDE                 | 0.421                                                        | 8.170                          | 1242.17            | 10148.37           | 3.44                           | 1058.90            | 3642.89            |
| A_68_P21821742 | chr2:164941702-164941746                          | NM_174988:118513   | Cdh22      | INSIDE                 | 0.55                                                         | 2.909                          | 2460.56            | 7156.56            | 1.6                            | 1802.61            | 2884.77            |
| A_68_P21822536 | chr2:165059487-165059531                          | NM_174988:729      | Cdh22      | INSIDE                 | 0.653                                                        | 0.658                          | 1326.06            | 872.62             | 0.43                           | 1017.23            | 436.94             |
| A_68_P27173579 | chr10:59766022-59766066                           | NM_023370:393194   | Cdh23      | INSIDE                 | 0.121                                                        | 16.315                         | 846.63             | 13812.65           | 1.978                          | 747.59             | 1478.85            |
| A_68_P27176099 | chr10:60150136-60150180                           | NM_023370:9080     | Cdh23      | INSIDE                 | 0.456                                                        | 3.488                          | 1117.94            | 3898.86            | 1.59                           | 917.36             | 1458.73            |
| A_68_P26140014 | chr8:109035535-109035580                          | NM_001037809:745   | Cdh3       | INSIDE                 | 0.187                                                        | 11.664                         | 9171.41            | 106978.50          | 2.182                          | 8027.61            | 17513.77           |
| A_68_P21897030 | chr2:179177570-179177614                          | NM_009867:410      | Cdh4       | INSIDE                 | 0.43                                                         | 9.182                          | 2792.08            | 25637.36           | 3.945                          | 2153.25            | 8495.40            |
| A_68_P30026213 | chr15:13102919-13102963                           | NM_007666:454      | Cdh6       | INSIDE                 | 0.396                                                        | 6.502                          | 2502.72            | 16273.66           | 2.575                          | 2172.51            | 5593.89            |
| A_68_P30026215 | chr15:13103074-13103118                           | NM_007666:298      | Cdh6       | INSIDE                 | 0.588                                                        | 0.437                          | 5506.34            | 2405.26            | 0.257                          | 4060.96            | 1042.48            |
| A_68_P26102845 | chr8:101939884-101939928                          | NM_001039154:451   | Cdh8       | INSIDE                 | 0.467                                                        | 5.249                          | 2953.65            | 15503.17           | 2.453                          | 2063.21            | 5060.41            |
| A_68_P26102842 | chr8:101939617-101939661                          | NM_001039154:719   | Cdh8       | INSIDE                 | 0.496                                                        | 8.799                          | 1533.99            | 13497.46           | 4.363                          | 1323.93            | 5776.83            |
| A_68_P26102849 | chr8:101940329-101940373                          | NM_001039154:7     | Cdh8       | INSIDE                 | 0.612                                                        | 0.705                          | 4017.61            | 2833.88            | 0.431                          | 2796.13            | 1206.36            |
| A_68_P25503356 | chr7:134119822-134119866                          | NM_026638:-18      | Cdipt      | PROMOTER               | 0.442                                                        | 3.628                          | 966.35             | 3505.92            | 1.604                          | 844.14             | 1354.39            |
| A_68_P27351975 | chr10:92623318-92623362                           | NM_146239:-280     | Cdk17      | PROMOTER               | 0.223                                                        | 11.705                         | 5132.61            | 60077.03           | 2.611                          | 4930.82            | 12872.48           |
| A_68_P27351976 | chr10:92623453-92623497                           | NM_146239:-146     | Cdk17      | PROMOTER               | 0.57                                                         | 10.033                         | 754.08             | 7565.82            | 5.716                          | 640.89             | 3662.99            |
| A_68_P27083524 | chr10:40069451-40069495                           | NM_001168304:359   | Cdk19      | INSIDE                 | 0.279                                                        | 0.305                          | 6264.76            | 1912.16            | 0.085                          | 4187.27            | 356.63             |
| A_68_P27083521 | chr10:40069136-40069180                           | NM_001168304:45    | Cdk19      | INSIDE                 | 0.419                                                        | 20.585                         | 514.73             | 10595.62           | 8.626                          | 386.71             | 3335.93            |
| A_68_P27542787 | chr10:128142015-128142063                         | NM_016756:69       | Cdk2       | INSIDE                 | 0.173                                                        | 1.694                          | 1365.89            | 2313.57            | 0.293                          | 989.41             | 289.76             |
| A_68_P24060833 | chr5:124803880-124803924                          | NM_013812:735      | Cdk2ap1    | INSIDE                 | 0.412                                                        | 20.972                         | 771.72             | 16184.25           | 8.633                          | 687.24             | 5932.78            |
| A_68_P27533815 | chr10:126500675-126500719                         | NM_009870:38       | Cdk4       | INSIDE                 | 0.504                                                        | 0.525                          | 1254.97            | 658.46             | 0.265                          | 966.39             | 255.76             |
| A_68_P27954537 | chr11:80290536-80290580                           | NM_009871:11       | Cdk5r1     | INSIDE                 | 0.566                                                        | 6.419                          | 10936.56           | 70198.78           | 3.631                          | 9125.18            | 33134.19           |
| A_68_P20350886 | chr1:74902924-74902968                            | NM_009872:1344     | Cdk5r2     | INSIDE                 | 0.532                                                        | 0.281                          | 6282.17            | 1764.43            | 0.149                          | 4219.24            | 630.68             |
| A_68_P20350877 | chr1:74901834-74901878                            | NM_009872:254      | Cdk5r2     | INSIDE                 | 0.539                                                        | 0.438                          | 1040.40            | 455.80             | 0.236                          | 905.21             | 213.60             |
| A_68_P20350875 | chr1:74901471-74901515                            | NM_009872:-110     | Cdk5r2     | PROMOTER               | 0.414                                                        | 4.547                          | 974.26             | 4430.07            | 1.881                          | 794.09             | 1493.44            |
| A_68_P23005993 | chr4:70071160-70071204                            | NM_145990:219      | Cdk5rap2   | INSIDE                 | 0.567                                                        | 0.147                          | 4949.06            | 726.73             | 0.083                          | 3524.09            | 293.40             |
| A_68_P23005994 | chr4:70071277-70071321                            | NM_145990:103      | Cdk5rap2   | INSIDE                 | 0.664                                                        | 0.263                          | 2240.90            | 589.43             | 0.175                          | 1661.80            | 290.41             |
| A_68_P23444287 | chr5:3341583-3341627                              | NM_009873:-2707    | Cdk6       | PROMOTER               | 0.346                                                        | 7.849                          | 2581.77            | 20263.14           | 2.715                          | 2244.07            | 6092.60            |
| A_68_P24167402 | chr5:147042562-147042606                          | NM_153599:-666     | Cdk8       | DIVERGENT_PROMOTER     | 0.597                                                        | 0.497                          | 1579.68            | 785.19             | 0.297                          | 1236.00            | 366.94             |
| A_68_P24167580 | chr5:147072895-147072939                          | NM_153599:29666    | Cdk8       | INSIDE                 | 0.619                                                        | 5.660                          | 379.19             | 2146.16            | 3.503                          | 345.31             | 1209.71            |
| A_68_P23891971 | chr5:92471843-92471887                            | NM_177270:168      | Cdkl2      | INSIDE                 | 0.564                                                        | 3.861                          | 482.99             | 1865.05            | 2.176                          | 418.03             | 909.83             |
| A_68_P31125926 | chr17:29231558-29231602                           | NM_007669:864      | Cdkn1a     | INSIDE                 | 0.3                                                          | 2.268                          | 3423.41            | 7764.88            | 0.681                          | 2595.19            | 1766.35            |
| A_68_P25601118 | chr7:150651001-150651045                          | NM_001161624:-4067 | Cdkn1c     | DIVERGENT_PROMOTER     | 0.173                                                        | 18.322                         | 529.67             | 9704.43            | 3.176                          | 462.05             | 1467.42            |
| A_68_P25601080 | chr7:150646296-150646340                          | NM_001161624:637   | Cdkn1c     | INSIDE                 | 0.26                                                         | 14.916                         | 1195.35            | 17830.27           | 3.877                          | 1061.87            | 4117.31            |
| A_68_P25601085 | chr7:150646964-150647018                          | NM_001161624:-35   | Cdkn1c     | PROMOTER               | 0.256                                                        | 7.569                          | 707.02             | 5351.67            | 1.939                          | 546.95             | 1060.28            |
| A_68_P23094811 | chr4:88940707-88940751                            | NM_009877:-205     | Cdkn2a     | PROMOTER               | 0.625                                                        | 3.161                          | 604.22             | 1910.18            | 1.975                          | 593.11             | 1171.53            |
| A_68_P25843141 | chr8:48799219-48799263                            | NM_172407:45       | Cdkn2aip   | INSIDE                 | 0.477                                                        | 0.483                          | 3633.83            | 1756.62            | 0.23                           | 2433.44            | 560.54             |
| A_68_P25843136 | chr8:48798707-48798751                            | NM_172407:557      | Cdkn2aip   | INSIDE                 | 0.569                                                        | 0.527                          | 2771.69            | 1460.96            | 0.3                            | 2211.68            | 662.96             |
| A_68_P27796702 | chr11:51781404-51781448                           | NM_029976:294      | Cdkn2aipnl | INSIDE                 | 0.63                                                         | 0.356                          | 1453.59            | 517.93             | 0.225                          | 1158.01            | 260.14             |
| A_68_P23202006 | chr4:109338923-109338967                          | NM_007671:-967     | Cdkn2c     | PROMOTER               | 0.37                                                         | 0.338                          | 1723.95            | 583.48             | 0.125                          | 1356.14            | 169.73             |
| A_68_P23201928 | chr4:109330089-109330133                          | NM_007671:7867     | Cdkn2c     | DOWNSTREAM             | 0.45                                                         | 5.676                          | 1055.39            | 5990.17            | 2.553                          | 959.69             | 2449.94            |
| A_68_P25471451 | chr7:128125324-128125368                          | NM_007672:480      | Cdr2       | INSIDE                 | 0.406                                                        | 0.501                          | 2837.84            | 1421.71            | 0.203                          | 1992.31            | 405.40             |
| A_68_P28153160 | chr11:115243190-115243234                         | NM_001080929:-17   | Cdr2l      | PROMOTER               | 0.509                                                        | 3.683                          | 1435.95            | 5288.46            | 1.875                          | 1335.48            | 2504.23            |
| A_68_P28153229 | chr11:115255200-115255244                         | NM_001080929:11993 | Cdr2l      | INSIDE                 | 0.628                                                        | 3.517                          | 668.94             | 2352.56            | 2.209                          | 489.48             | 1081.14            |
| A_68_P26234239 | chr8:125091584-125091628                          | NM_026014:-308     | Cdt1       | PROMOTER               | 0.426                                                        | 3.518                          | 2085.22            | 7334.98            | 1.5                            | 1582.37            | 2373.97            |
| A_68_P31755200 | chr18:61195546-61195590                           | NM_009880:285      | Cdx1       | INSIDE                 | 0.221                                                        | 11.201                         | 722.28             | 8090.13            | 2.475                          | 794.46             | 1966.40            |
| A_68_P31755201 | chr18:61195733-61195777                           | NM_009880:99       | Cdx1       | INSIDE                 | 0.585                                                        | 0.698                          | 3035.76            | 2120.11            | 0.409                          | 2005.97            | 820.20             |

| ProbeName      | Target position of probe on CpG island microarray | TargetID            | GeneSymbol | CpG island Description | Ratio of relative methylation (TiO <sub>2</sub> -NP/Vehicle) | Sham group                     |                    |                    | TiO <sub>2</sub> -H group      |                    |                    |
|----------------|---------------------------------------------------|---------------------|------------|------------------------|--------------------------------------------------------------|--------------------------------|--------------------|--------------------|--------------------------------|--------------------|--------------------|
|                |                                                   |                     |            |                        |                                                              | Relative methylation (Cy5/Cy3) | Cy3 signal (Input) | Cy5 signal (MeDIP) | Relative methylation (Cy5/Cy3) | Cy3 signal (Input) | Cy5 signal (MeDIP) |
| A_68_P24172963 | chr5:148116041-148116085                          | NM_007673:2763      | Cdx2       | INSIDE                 | 0.639                                                        | 3.544                          | 872.26             | 3091.52            | 2.266                          | 721.71             | 1635.18            |
| A_68_P28944866 | chr13:35832734-35832778                           | NM_001123386:-514   | Cdyl       | PROMOTER               | 0.487                                                        | 4.163                          | 1232.12            | 5128.81            | 2.027                          | 1092.79            | 2215.19            |
| A_68_P24995570 | chr7:20437597-20437641                            | NM_001033419:9030   | Ceacam16   | INSIDE                 | 0.521                                                        | 0.268                          | 1838.15            | 492.22             | 0.14                           | 1480.66            | 206.57             |
| A_68_P25047620 | chr7:35905422-35905466                            | NM_007678:1133      | Cebpa      | INSIDE                 | 0.615                                                        | 0.512                          | 1630.16            | 835.33             | 0.315                          | 1265.58            | 398.61             |
| A_68_P21836878 | chr2:167514004-167514048                          | NM_009883:-388      | Cebpb      | PROMOTER               | 0.537                                                        | 0.471                          | 1536.86            | 723.17             | 0.253                          | 1231.98            | 311.52             |
| A_68_P21836882 | chr2:167514407-167514451                          | NM_009883:14        | Cebpb      | INSIDE                 | 0.587                                                        | 2.704                          | 2136.50            | 5777.64            | 1.589                          | 1693.39            | 2690.21            |
| A_68_P21836888 | chr2:167514985-167515029                          | NM_009883:592       | Cebpb      | INSIDE                 | 0.371                                                        | 5.788                          | 327.85             | 1897.52            | 2.148                          | 319.02             | 685.39             |
| A_68_P30567436 | chr16:15887941-15887985                           | NM_007679:584       | Cebpd      | INSIDE                 | 0.33                                                         | 13.847                         | 733.64             | 10158.95           | 4.563                          | 620.94             | 2833.16            |
| A_68_P30567429 | chr16:15887235-15887279                           | NM_007679:-122      | Cebpd      | PROMOTER               | 0.585                                                        | 30.953                         | 6093.78            | 188621.10          | 18.113                         | 5712.86            | 103476.90          |
| A_68_P25047313 | chr7:35841354-35841398                            | NM_009884:209       | Cebpg      | INSIDE                 | 0.526                                                        | 3.028                          | 3535.25            | 10703.41           | 1.591                          | 2856.93            | 4546.54            |
| A_68_P24799551 | chr6:120615439-120615483                          | NM_001128151:-978   | Cecr2      | PROMOTER               | 0.474                                                        | 4.269                          | 2543.82            | 10860.79           | 2.023                          | 2127.83            | 4304.58            |
| A_68_P24798987 | chr6:120481227-120481271                          | NM_144815:69        | Cecr5      | INSIDE                 | 0.534                                                        | 4.282                          | 1509.08            | 6461.25            | 2.285                          | 1150.60            | 2629.22            |
| A_68_P24798986 | chr6:120481161-120481205                          | NM_144815:135       | Cecr5      | INSIDE                 | 0.593                                                        | 2.523                          | 1257.96            | 3173.68            | 1.495                          | 1085.36            | 1623.10            |
| A_68_P24798780 | chr6:120442970-120443014                          | NM_033567:833       | Cecr6      | INSIDE                 | 0.463                                                        | 16.954                         | 4369.27            | 74076.24           | 7.85                           | 3106.16            | 24383.86           |
| A_68_P24798783 | chr6:120443507-120443551                          | NM_033567:297       | Cecr6      | INSIDE                 | 0.666                                                        | 0.436                          | 2314.77            | 1008.29            | 0.29                           | 1795.16            | 521.01             |
| A_68_P31565718 | chr18:25645741-25645785                           | NM_001146292:266722 | Celf4      | INSIDE                 | 0.44                                                         | 4.904                          | 1561.25            | 7656.30            | 2.16                           | 1144.42            | 2471.74            |
| A_68_P31565714 | chr18:25645254-25645298                           | NM_001146292:267208 | Celf4      | INSIDE                 | 0.444                                                        | 4.888                          | 2053.16            | 10035.31           | 2.17                           | 1638.29            | 3555.79            |
| A_68_P27289987 | chr10:80945075-80945119                           | NM_176954:358       | Celf5      | INSIDE                 | 0.332                                                        | 18.947                         | 5483.64            | 103900.40          | 6.291                          | 3725.25            | 23434.93           |
| A_68_P27289858 | chr10:80927485-80927529                           | NM_176954:17948     | Celf5      | INSIDE                 | 0.367                                                        | 1.340                          | 8390.11            | 11240.92           | 0.491                          | 5695.79            | 2799.19            |
| A_68_P30404613 | chr15:85862950-85862994                           | NM_009886:1235      | Celsr1     | INSIDE                 | 0.636                                                        | 4.606                          | 1615.73            | 7441.87            | 2.931                          | 1208.20            | 3541.62            |
| A_68_P30404626 | chr15:85864596-85864640                           | NM_009886:-411      | Celsr1     | PROMOTER               | 0.657                                                        | 0.581                          | 2083.94            | 1210.54            | 0.382                          | 1774.91            | 677.21             |
| A_68_P30404229 | chr15:85809217-85809261                           | NM_009886:54969     | Celsr1     | INSIDE                 | 0.351                                                        | 5.269                          | 1614.55            | 8507.35            | 1.848                          | 1182.44            | 2185.64            |
| A_68_P22412541 | chr3:108218746-108218790                          | NM_001004177:-356   | Celsr2     | PROMOTER               | 0.24                                                         | 15.877                         | 2016.82            | 32021.64           | 3.814                          | 1614.50            | 6157.16            |
| A_68_P26816838 | chr9:108728469-108728513                          | NM_080437:-160      | Celsr3     | PROMOTER               | 0.409                                                        | 0.187                          | 3640.34            | 681.57             | 0.076                          | 2949.95            | 225.67             |
| A_68_P26816837 | chr9:108728364-108728408                          | NM_080437:-264      | Celsr3     | PROMOTER               | 0.414                                                        | 0.512                          | 8693.32            | 4447.53            | 0.212                          | 6223.71            | 1319.29            |
| A_68_P26816894 | chr9:108734858-108734902                          | NM_080437:6230      | Celsr3     | INSIDE                 | 0.491                                                        | 6.222                          | 4033.27            | 25093.37           | 3.054                          | 3027.75            | 9248.06            |
| A_68_P26816895 | chr9:108734927-108734971                          | NM_080437:6298      | Celsr3     | INSIDE                 | 0.569                                                        | 8.214                          | 2875.96            | 23622.34           | 4.673                          | 2499.77            | 11681.26           |
| A_68_P23573892 | chr5:30969470-30969514                            | NM_007681:218       | Cenpa      | INSIDE                 | 0.581                                                        | 3.046                          | 2324.66            | 7080.01            | 1.77                           | 1988.79            | 3519.49            |
| A_68_P23861886 | chr5:86494686-86494730                            | NM_007683:-100      | Cenpe1     | DIVERGENT_PROMOTER     | 0.666                                                        | 0.643                          | 7619.39            | 4899.97            | 0.428                          | 5698.32            | 2441.10            |
| A_68_P23861882 | chr5:86494317-86494361                            | NM_007683:270       | Cenpe1     | INSIDE                 | 0.319                                                        | 2.040                          | 3291.36            | 6713.29            | 0.65                           | 2685.93            | 1744.97            |
| A_68_P29270037 | chr13:101545636-101545680                         | NM_021886:196       | Cenph      | INSIDE                 | 0.658                                                        | 0.349                          | 2288.58            | 798.31             | 0.229                          | 1706.39            | 391.51             |
| A_68_P29623591 | chr14:57190486-57190530                           | NM_001014996:175    | Cenpj      | INSIDE                 | 0.427                                                        | 4.097                          | 1211.40            | 4962.78            | 1.748                          | 1260.50            | 2203.74            |
| A_68_P29289426 | chr13:105018966-105019010                         | NM_181061:-46       | Cenpk      | DIVERGENT_PROMOTER     | 0.595                                                        | 4.743                          | 326.02             | 1546.31            | 2.822                          | 334.04             | 942.58             |
| A_68_P21603778 | chr2:125450808-125450852                          | NM_001081091:19     | Cep152     | INSIDE                 | 0.632                                                        | 0.598                          | 6737.22            | 4028.77            | 0.378                          | 4941.34            | 1866.57            |
| A_68_P21768600 | chr2:155782266-155782310                          | NM_001129999:-5     | Cep250     | PROMOTER               | 0.177                                                        | 19.405                         | 1864.65            | 36184.14           | 3.434                          | 1641.80            | 5637.64            |
| A_68_P32099204 | chr19:38129403-38129447                           | NM_028293:-90       | Cep55      | PROMOTER               | 0.231                                                        | 57.055                         | 9245.04            | 527471.50          | 13.191                         | 9890.78            | 130469.40          |
| A_68_P32099202 | chr19:38129262-38129306                           | NM_028293:-230      | Cep55      | PROMOTER               | 0.267                                                        | 30.788                         | 9046.59            | 278527.00          | 8.207                          | 9071.33            | 74444.28           |
| A_68_P26313777 | chr9:13631232-13631276                            | NR_037622:243       | Cep57      | INSIDE                 | 0.664                                                        | 0.278                          | 3866.52            | 1073.51            | 0.184                          | 2811.76            | 518.03             |
| A_68_P27630622 | chr11:20149303-20149348                           | NM_172260:102       | Cep68      | INSIDE                 | 0.282                                                        | 17.107                         | 3038.66            | 51981.22           | 4.827                          | 2618.37            | 12639.74           |
| A_68_P27630625 | chr11:20149743-20149787                           | NM_172260:-337      | Cep68      | PROMOTER               | 0.591                                                        | 0.504                          | 1452.65            | 732.27             | 0.298                          | 1031.53            | 307.34             |
| A_68_P27630624 | chr11:20149666-20149710                           | NM_172260:-261      | Cep68      | PROMOTER               | 0.504                                                        | 0.720                          | 1989.84            | 1432.55            | 0.363                          | 1356.32            | 491.79             |
| A_68_P26762950 | chr9:99144040-99144084                            | NM_023873:176       | Cep70      | INSIDE                 | 0.559                                                        | 9.921                          | 1401.65            | 13905.76           | 5.55                           | 1212.50            | 6729.16            |
| A_68_P29144056 | chr13:74199745-74199789                           | NM_028959:-33       | Cep72      | PROMOTER               | 0.337                                                        | 16.654                         | 3072.90            | 51176.20           | 5.609                          | 3388.41            | 19004.13           |
| A_68_P31792809 | chr18:67770642-67770686                           | NM_001081073:30326  | Cep76      | DOWNSTREAM             | 0.397                                                        | 6.216                          | 1089.49            | 6771.76            | 2.468                          | 1005.06            | 2480.30            |
| A_68_P31792810 | chr18:67770708-67770752                           | NM_001081073:30260  | Cep76      | DOWNSTREAM             | 0.576                                                        | 0.658                          | 1105.71            | 727.22             | 0.379                          | 1012.07            | 383.69             |
| A_68_P31792971 | chr18:67800851-67800895                           | NM_001081073:118    | Cep76      | INSIDE                 | 0.466                                                        | 3.857                          | 720.81             | 2779.85            | 1.798                          | 679.86             | 1222.12            |

| ProbeName      | Target position of probe on CpG island microarray | TargetID           | GeneSymbol | CpG island Description | Ratio of relative methylation (TiO <sub>2</sub> -NP/Vehicle) | Sham group                     |                    |                    | TiO <sub>2</sub> -H group      |                    |                    |
|----------------|---------------------------------------------------|--------------------|------------|------------------------|--------------------------------------------------------------|--------------------------------|--------------------|--------------------|--------------------------------|--------------------|--------------------|
|                |                                                   |                    |            |                        |                                                              | Relative methylation (Cy5/Cy3) | Cy3 signal (Input) | Cy5 signal (MeDIP) | Relative methylation (Cy5/Cy3) | Cy3 signal (Input) | Cy5 signal (MeDIP) |
| A_68_P31977524 | chr19:16059019-16059063                           | NM_198019:439      | Cep78      | INSIDE                 | 0.501                                                        | 0.384                          | 2983.24            | 1144.87            | 0.192                          | 2138.88            | 411.22             |
| A_68_P31929035 | chr19:5490695-5490739                             | NM_007687:262      | Cf1l       | INSIDE                 | 0.322                                                        | 11.423                         | 3453.07            | 39445.90           | 3.674                          | 2630.89            | 9665.41            |
| A_68_P31929038 | chr19:5491024-5491068                             | NM_007687:592      | Cf1l       | INSIDE                 | 0.483                                                        | 0.373                          | 1272.67            | 474.73             | 0.18                           | 986.48             | 177.69             |
| A_68_P31929033 | chr19:5490488-5490532                             | NM_007687:56       | Cf1l       | INSIDE                 | 0.329                                                        | 5.989                          | 873.16             | 5229.05            | 1.972                          | 753.87             | 1486.93            |
| A_68_P28449510 | chr12:55963628-55963672                           | NM_007688:214      | Cf12       | INSIDE                 | 0.572                                                        | 5.500                          | 1531.36            | 8422.45            | 3.146                          | 1442.53            | 4537.63            |
| A_68_P28449512 | chr12:55963938-55963982                           | NM_007688:-96      | Cf12       | PROMOTER               | 0.168                                                        | 9.125                          | 1665.60            | 15198.37           | 1.532                          | 1307.04            | 2002.73            |
| A_68_P30822062 | chr16:64851258-64851302                           | NM_178647:-630     | Cggbp1     | PROMOTER               | 0.531                                                        | 0.209                          | 3501.21            | 732.46             | 0.111                          | 2619.53            | 290.81             |
| A_68_P30822060 | chr16:64851057-64851101                           | NM_178647:-832     | Cggbp1     | PROMOTER               | 0.576                                                        | 0.224                          | 9221.36            | 2065.80            | 0.129                          | 6066.40            | 783.08             |
| A_68_P22340674 | chr3:94590393-94590437                            | NM_001037711:23    | Cgn        | INSIDE                 | 0.313                                                        | 7.545                          | 3002.19            | 22650.92           | 2.358                          | 2711.27            | 6392.85            |
| A_68_P22340619 | chr3:94583028-94583072                            | NM_001037711:7387  | Cgn        | INSIDE                 | 0.492                                                        | 5.912                          | 306.30             | 1810.85            | 2.908                          | 289.58             | 842.15             |
| A_68_P26624019 | chr9:71619304-71619348                            | NM_026599:83       | Cgml1      | INSIDE                 | 0.45                                                         | 4.902                          | 1947.44            | 9545.76            | 2.206                          | 1679.43            | 3704.12            |
| A_68_P29578607 | chr14:47452213-47452258                           | NM_026832:317      | Cgrrf1     | INSIDE                 | 0.567                                                        | 2.435                          | 2532.12            | 6165.72            | 1.38                           | 1959.46            | 2704.57            |
| A_68_P30379091 | chr15:81523948-81523992                           | NM_001164320:3747  | Chad1      | INSIDE                 | 0.091                                                        | 41.972                         | 1671.69            | 70164.26           | 3.816                          | 1462.93            | 5581.92            |
| A_68_P30379103 | chr15:81524969-81525013                           | NM_001164320:2727  | Chad1      | INSIDE                 | 0.282                                                        | 13.925                         | 1681.44            | 23413.85           | 3.931                          | 1302.78            | 5121.83            |
| A_68_P30379097 | chr15:81524393-81524437                           | NM_001164320:3303  | Chad1      | INSIDE                 | 0.411                                                        | 0.322                          | 1769.37            | 570.33             | 0.133                          | 1366.02            | 181.13             |
| A_68_P30379106 | chr15:81525333-81525377                           | NM_001164320:2363  | Chad1      | INSIDE                 | 0.422                                                        | 11.691                         | 1476.74            | 17263.98           | 4.933                          | 1194.11            | 5891.04            |
| A_68_P30379101 | chr15:81524789-81524833                           | NM_001164320:2907  | Chad1      | INSIDE                 | 0.649                                                        | 3.052                          | 646.63             | 1973.68            | 1.981                          | 583.89             | 1156.81            |
| A_68_P30978142 | chr16:93884445-93884489                           | NM_028083:321      | Chaf1b     | INSIDE                 | 0.244                                                        | 0.425                          | 2301.01            | 978.78             | 0.104                          | 1690.65            | 175.49             |
| A_68_P30978138 | chr16:93883923-93883967                           | NM_028083:-201     | Chaf1b     | PROMOTER               | 0.636                                                        | 4.336                          | 2324.51            | 10078.63           | 2.757                          | 1919.49            | 5292.90            |
| A_68_P30978140 | chr16:93884209-93884253                           | NM_028083:85       | Chaf1b     | INSIDE                 | 0.657                                                        | 0.532                          | 1619.71            | 861.76             | 0.35                           | 1309.22            | 457.70             |
| A_68_P27259492 | chr10:75398810-75398854                           | NM_175329:515      | Cchcd10    | INSIDE                 | 0.409                                                        | 0.186                          | 3117.24            | 579.15             | 0.076                          | 2302.76            | 174.93             |
| A_68_P24347497 | chr6:33010009-33010053                            | NM_025336:122      | Cchcd3     | INSIDE                 | 0.444                                                        | 0.478                          | 1214.83            | 580.57             | 0.212                          | 927.20             | 196.82             |
| A_68_P24639207 | chr6:91423387-91423431                            | NM_133928:9        | Cchcd4     | INSIDE                 | 0.662                                                        | 2.413                          | 2010.49            | 4851.60            | 1.597                          | 1619.53            | 2586.39            |
| A_68_P22695192 | chr4:3865915-3865959                              | NM_001190323:-98   | Cchcd7     | DIVERGENT_PROMOTER     | 0.252                                                        | 7.338                          | 3153.31            | 23137.54           | 1.851                          | 2769.80            | 5126.22            |
| A_68_P22695193 | chr4:3866029-3866073                              | NM_001190322:-10   | Cchcd7     | PROMOTER               | 0.486                                                        | 0.483                          | 1131.22            | 546.78             | 0.235                          | 920.49             | 216.32             |
| A_68_P22695196 | chr4:3866420-3866464                              | NM_001190322:382   | Cchcd7     | INSIDE                 | 0.659                                                        | 4.869                          | 1288.27            | 6272.45            | 3.208                          | 989.39             | 3173.73            |
| A_68_P25368311 | chr7:107685728-107685772                          | NM_183270:137      | Cchcd8     | INSIDE                 | 0.277                                                        | 7.571                          | 1321.27            | 10003.53           | 2.095                          | 1108.89            | 2323.37            |
| A_68_P22355191 | chr3:97414110-97414154                            | NM_026539:-19      | Chd11      | PROMOTER               | 0.606                                                        | 9.798                          | 580.75             | 5689.89            | 5.94                           | 512.93             | 3046.67            |
| A_68_P22355190 | chr3:97413997-97414041                            | NM_026539:95       | Chd11      | INSIDE                 | 0.342                                                        | 6.016                          | 765.60             | 4606.19            | 2.057                          | 610.17             | 1254.83            |
| A_68_P27894659 | chr11:69182111-69182155                           | NM_146019:796      | Chd3       | INSIDE                 | 0.577                                                        | 4.082                          | 2063.37            | 8422.58            | 2.354                          | 1779.21            | 4188.85            |
| A_68_P24818636 | chr6:125046050-125046094                          | NM_145979:-108     | Chd4       | PROMOTER               | 0.313                                                        | 5.125                          | 6149.47            | 31516.36           | 1.602                          | 4411.77            | 7068.90            |
| A_68_P24818640 | chr6:125046428-125046472                          | NM_145979:270      | Chd4       | INSIDE                 | 0.555                                                        | 2.798                          | 862.57             | 2413.52            | 1.552                          | 926.41             | 1437.45            |
| A_68_P23418119 | chr4:151713113-151713157                          | NM_001081376:375   | Chd5       | INSIDE                 | 0.163                                                        | 13.456                         | 2790.23            | 37545.95           | 2.19                           | 2143.06            | 4693.59            |
| A_68_P21799022 | chr2:160934858-160934902                          | NM_173368:-88      | Chd6       | PROMOTER               | 0.65                                                         | 0.532                          | 866.92             | 460.97             | 0.346                          | 647.53             | 223.77             |
| A_68_P21799020 | chr2:160934676-160934731                          | NM_173368:89       | Chd6       | INSIDE                 | 0.419                                                        | 6.658                          | 214.87             | 1430.64            | 2.792                          | 243.39             | 679.64             |
| A_68_P22715818 | chr4:8619237-8619281                              | NM_001081417:1191  | Chd7       | INSIDE                 | 0.42                                                         | 0.275                          | 1894.89            | 520.93             | 0.115                          | 1493.17            | 172.27             |
| A_68_P22715806 | chr4:8617250-8617294                              | NM_001081417:-795  | Chd7       | PROMOTER               | 0.613                                                        | 4.086                          | 880.35             | 3596.76            | 2.504                          | 685.49             | 1716.58            |
| A_68_P22716231 | chr4:8679020-8679064                              | NM_001081417:60975 | Chd7       | INSIDE                 | 0.3                                                          | 5.253                          | 1364.86            | 7170.26            | 1.575                          | 917.61             | 1445.16            |
| A_68_P26055737 | chr8:93432164-93432208                            | NM_177224:79453    | Chd9       | INSIDE                 | 0.29                                                         | 18.281                         | 948.29             | 17335.94           | 5.302                          | 998.94             | 5295.97            |
| A_68_P26055365 | chr8:93352513-93352557                            | NM_177224:-199     | Chd9       | PROMOTER               | 0.333                                                        | 7.317                          | 486.61             | 3560.55            | 2.439                          | 424.34             | 1035.12            |
| A_68_P32572442 | chrX:100551806-100551850                          | NM_009767:14       | Chic1      | INSIDE                 | 0.184                                                        | 15.428                         | 1926.24            | 29718.22           | 2.84                           | 2472.37            | 7022.37            |
| A_68_P23807022 | chr5:75440246-75440290                            | NM_028850:383      | Chic2      | INSIDE                 | 0.246                                                        | 1.463                          | 1049.65            | 1535.45            | 0.36                           | 926.86             | 333.44             |
| A_68_P31919589 | chr19:3852192-3852236                             | NM_001025566:442   | Chka       | INSIDE                 | 0.382                                                        | 0.599                          | 1508.85            | 904.16             | 0.229                          | 1308.64            | 299.27             |
| A_68_P26238529 | chr8:125736395-125736439                          | NM_145606:272      | Chmp1a     | INSIDE                 | 0.471                                                        | 3.174                          | 1819.47            | 5775.86            | 1.494                          | 1353.84            | 2022.20            |
| A_68_P31790565 | chr18:67365128-67365172                           | NM_024190:138      | Chmp1b     | INSIDE                 | 0.566                                                        | 5.858                          | 4765.16            | 27912.95           | 3.314                          | 3647.28            | 12087.23           |
| A_68_P31790570 | chr18:67365551-67365595                           | NM_024190:560      | Chmp1b     | INSIDE                 | 0.631                                                        | 2.357                          | 2289.45            | 5395.54            | 1.487                          | 1860.02            | 2765.35            |

| ProbeName      | Target position of probe on CpG island microarray | TargetID           | GeneSymbol | CpG island Description | Ratio of relative methylation (TiO <sub>2</sub> -NP/Vehicle) | Sham group                     |                    |                    | TiO <sub>2</sub> -H group      |                    |                    |
|----------------|---------------------------------------------------|--------------------|------------|------------------------|--------------------------------------------------------------|--------------------------------|--------------------|--------------------|--------------------------------|--------------------|--------------------|
|                |                                                   |                    |            |                        |                                                              | Relative methylation (Cy5/Cy3) | Cy3 signal (Input) | Cy5 signal (MeDIP) | Relative methylation (Cy5/Cy3) | Cy3 signal (Input) | Cy5 signal (MeDIP) |
| A_68_P24974265 | chr7:13619964-13620008                            | NM_026885:140      | Chmp2a     | INSIDE                 | 0.571                                                        | 0.403                          | 3366.75            | 1357.02            | 0.23                           | 2286.17            | 526.01             |
| A_68_P29696921 | chr14:70132430-70132474                           | NM_134078:-75      | Chmp7      | PROMOTER               | 0.653                                                        | 2.613                          | 2372.06            | 6197.19            | 1.706                          | 1881.65            | 3209.46            |
| A_68_P24460755 | chr6:53989925-53989969                            | NM_001163640:21    | Chn2       | INSIDE                 | 0.431                                                        | 0.596                          | 858.85             | 511.94             | 0.257                          | 669.36             | 171.98             |
| A_68_P24460750 | chr6:53989374-53989418                            | NM_001163640:-529  | Chn2       | PROMOTER               | 0.636                                                        | 2.797                          | 865.28             | 2420.57            | 1.778                          | 748.54             | 1331.26            |
| A_68_P25365140 | chr7:107154438-107154482                          | NM_133709:-453     | Chrdl2     | PROMOTER               | 0.107                                                        | 64.666                         | 543.23             | 35128.59           | 6.893                          | 373.70             | 2575.83            |
| A_68_P28821609 | chr13:10359502-10359546                           | NM_033269:525      | Chrm3      | PROMOTER               | 0.395                                                        | 0.576                          | 1024.44            | 590.48             | 0.228                          | 965.79             | 219.98             |
| A_68_P26528975 | chr9:54874310-54874354                            | NM_145129:34       | Chrna3     | INSIDE                 | 0.618                                                        | 2.598                          | 876.18             | 2276.68            | 1.606                          | 811.28             | 1302.93            |
| A_68_P21907947 | chr2:180763825-180763869                          | NM_015730:10036    | Chrna4     | INSIDE                 | 0.331                                                        | 7.261                          | 4234.19            | 30742.60           | 2.405                          | 2969.65            | 7141.43            |
| A_68_P21907945 | chr2:180763668-180763712                          | NM_015730:10192    | Chrna4     | INSIDE                 | 0.418                                                        | 7.791                          | 1207.11            | 9405.10            | 3.261                          | 853.24             | 2781.98            |
| A_68_P21907944 | chr2:180763528-180763574                          | NM_015730:10332    | Chrna4     | INSIDE                 | 0.366                                                        | 5.275                          | 1399.03            | 7379.94            | 1.932                          | 934.33             | 1805.33            |
| A_68_P27897123 | chr11:69609071-69609115                           | NM_009601:347      | Chmb1      | INSIDE                 | 0.559                                                        | 3.350                          | 1255.41            | 4205.55            | 1.872                          | 1001.39            | 1874.88            |
| A_68_P21429508 | chr2:92440060-92440104                            | NM_023850:219      | Chst1      | INSIDE                 | 0.566                                                        | 6.433                          | 1510.59            | 9717.78            | 3.644                          | 1150.55            | 4192.37            |
| A_68_P21429513 | chr2:92440608-92440652                            | NM_023850:767      | Chst1      | INSIDE                 | 0.598                                                        | 0.308                          | 1651.45            | 509.21             | 0.185                          | 1118.80            | 206.45             |
| A_68_P20162793 | chr1:38954859-38954904                            | NM_145142:124      | Chst10     | INSIDE                 | 0.302                                                        | 19.747                         | 1803.94            | 35622.22           | 5.973                          | 2835.95            | 16938.65           |
| A_68_P24141811 | chr5:141000117-141000161                          | NM_021528:18576    | Chst12     | INSIDE                 | 0.622                                                        | 2.961                          | 3669.43            | 10865.00           | 1.842                          | 2656.37            | 4892.24            |
| A_68_P21566993 | chr2:118752216-118752260                          | NM_028117:6        | Chst14     | INSIDE                 | 0.401                                                        | 11.372                         | 2140.97            | 24347.66           | 4.559                          | 1697.08            | 7737.28            |
| A_68_P21566994 | chr2:118752369-118752413                          | NM_028117:158      | Chst14     | INSIDE                 | 0.42                                                         | 3.898                          | 4647.71            | 18118.16           | 1.638                          | 3371.19            | 5521.00            |
| A_68_P25533785 | chr7:139508177-139508221                          | NM_029935:640      | Chst15     | INSIDE                 | 0.616                                                        | 0.467                          | 1349.27            | 629.68             | 0.287                          | 1094.66            | 314.49             |
| A_68_P26741575 | chr9:95307812-95307856                            | NM_018763:-145     | Chst2      | PROMOTER               | 0.245                                                        | 20.623                         | 3550.66            | 73225.83           | 5.044                          | 3073.33            | 15501.22           |
| A_68_P27173119 | chr10:59681994-59682038                           | NM_016803:-8       | Chst3      | PROMOTER               | 0.536                                                        | 3.536                          | 3467.42            | 12261.93           | 1.897                          | 2413.42            | 4578.17            |
| A_68_P27172919 | chr10:59649414-59649458                           | NM_016803:32572    | Chst3      | INSIDE                 | 0.617                                                        | 3.538                          | 1321.21            | 4674.07            | 2.184                          | 1074.13            | 2345.67            |
| A_68_P26170767 | chr8:114414110-114414154                          | NM_019950:19967    | Chst5      | INSIDE                 | 0.411                                                        | 0.310                          | 1865.94            | 578.25             | 0.127                          | 1536.47            | 195.58             |
| A_68_P26170766 | chr8:114414003-114414047                          | NM_019950:20075    | Chst5      | INSIDE                 | 0.523                                                        | 0.309                          | 2023.93            | 625.30             | 0.161                          | 1465.82            | 236.69             |
| A_68_P26170843 | chr8:114434234-114434278                          | NM_019950:-157     | Chst5      | PROMOTER               | 0.629                                                        | 3.022                          | 1518.32            | 4588.59            | 1.902                          | 1230.97            | 2341.80            |
| A_68_P32287119 | chrX:19637488-19637532                            | NM_021715:815      | Chst7      | INSIDE                 | 0.432                                                        | 10.040                         | 1630.78            | 16373.84           | 4.337                          | 1750.24            | 7590.14            |
| A_68_P32287125 | chrX:19638017-19638061                            | NM_021715:1343     | Chst7      | INSIDE                 | 0.497                                                        | 5.055                          | 343.26             | 1735.23            | 2.515                          | 480.13             | 1207.44            |
| A_68_P25044999 | chr7:35460778-35460822                            | NM_175140:136930   | Chst8      | INSIDE                 | 0.573                                                        | 0.389                          | 4148.98            | 1613.42            | 0.223                          | 2698.90            | 601.68             |
| A_68_P25045000 | chr7:35460861-35460905                            | NM_175140:136848   | Chst8      | INSIDE                 | 0.523                                                        | 0.613                          | 1084.91            | 665.47             | 0.321                          | 825.01             | 264.58             |
| A_68_P31746201 | chr18:59335430-59335474                           | NM_001081328:459   | Chsy3      | INSIDE                 | 0.602                                                        | 0.453                          | 1585.68            | 718.61             | 0.273                          | 1165.29            | 318.08             |
| A_68_P32130475 | chr19:44181890-44181934                           | NM_001162410:55    | Chuk       | INSIDE                 | 0.558                                                        | 6.616                          | 735.01             | 4863.13            | 3.69                           | 646.06             | 2383.75            |
| A_68_P32130473 | chr19:44181677-44181721                           | NM_001162410:269   | Chuk       | INSIDE                 | 0.476                                                        | 0.744                          | 4568.08            | 3399.23            | 0.354                          | 3182.38            | 1126.16            |
| A_68_P26079748 | chr8:97362202-97362246                            | NM_134141:16       | Ciapin1    | INSIDE                 | 0.651                                                        | 4.595                          | 471.83             | 2167.91            | 2.991                          | 360.09             | 1076.88            |
| A_68_P26526448 | chr9:54407958-54408002                            | NM_019686:-94      | Cib2       | PROMOTER               | 0.374                                                        | 4.087                          | 1069.65            | 4371.92            | 1.53                           | 1007.22            | 1541.02            |
| A_68_P25009418 | chr7:26067028-26067072                            | NM_001110131:-147  | Cic        | PROMOTER               | 0.06                                                         | 56.076                         | 12614.10           | 707349.50          | 3.379                          | 20306.15           | 68608.12           |
| A_68_P25009422 | chr7:26068018-26068068                            | NM_001110131:845   | Cic        | INSIDE                 | 0.33                                                         | 0.513                          | 1730.62            | 887.16             | 0.169                          | 1304.37            | 220.36             |
| A_68_P25009416 | chr7:26066870-26066914                            | NM_001110131:-305  | Cic        | PROMOTER               | 0.411                                                        | 0.141                          | 5035.75            | 707.79             | 0.058                          | 2966.70            | 171.57             |
| A_68_P25009389 | chr7:26063544-26063588                            | NM_001110131:-3631 | Cic        | PROMOTER               | 0.578                                                        | 3.300                          | 1444.02            | 4764.57            | 1.906                          | 1189.85            | 2267.65            |
| A_68_P25009419 | chr7:26067406-26067450                            | NM_001110131:231   | Cic        | INSIDE                 | 0.587                                                        | 11.482                         | 3090.74            | 35486.43           | 6.734                          | 2809.15            | 18918.15           |
| A_68_P25948488 | chr8:72407259-72407303                            | NM_026818:4011     | Cilp2      | INSIDE                 | 0.428                                                        | 4.236                          | 1748.11            | 7404.67            | 1.814                          | 1539.85            | 2793.22            |
| A_68_P25948535 | chr8:72413120-72413164                            | NM_026818:-1851    | Cilp2      | PROMOTER               | 0.432                                                        | 0.425                          | 1261.45            | 535.83             | 0.183                          | 957.92             | 175.63             |
| A_68_P25948536 | chr8:72413250-72413294                            | NM_026818:-1981    | Cilp2      | PROMOTER               | 0.582                                                        | 0.436                          | 2956.64            | 1288.76            | 0.254                          | 2137.20            | 542.41             |
| A_68_P25948479 | chr8:72406005-72406049                            | NM_026818:5265     | Cilp2      | INSIDE                 | 0.643                                                        | 3.411                          | 625.37             | 2132.93            | 2.194                          | 490.74             | 1076.68            |
| A_68_P27281431 | chr10:79630462-79630506                           | NM_007705:-101     | Cirbp      | PROMOTER               | 0.345                                                        | 0.485                          | 2374.36            | 1150.54            | 0.167                          | 1571.35            | 262.72             |
| A_68_P27281433 | chr10:79630600-79630644                           | NM_007705:37       | Cirbp      | INSIDE                 | 0.552                                                        | 2.588                          | 2085.26            | 5397.44            | 1.428                          | 1671.11            | 2386.72            |
| A_68_P26141979 | chr8:109417535-109417579                          | NM_011574:17       | Cirh1a     | INSIDE                 | 0.388                                                        | 14.567                         | 1565.24            | 22801.40           | 5.659                          | 1324.48            | 7494.86            |
| A_68_P27234932 | chr10:70807397-70807441                           | NM_134007:179      | Cisd1      | INSIDE                 | 0.55                                                         | 10.321                         | 718.93             | 7420.25            | 5.674                          | 651.18             | 3694.77            |



| ProbeName      | Target position of probe on CpG island microarray | TargetID           | GeneSymbol | CpG island Description | Ratio of relative methylation (TiO <sub>2</sub> -NP/Vehicle) | Sham group                     |                    |                    | TiO <sub>2</sub> -H group      |                    |                    |
|----------------|---------------------------------------------------|--------------------|------------|------------------------|--------------------------------------------------------------|--------------------------------|--------------------|--------------------|--------------------------------|--------------------|--------------------|
|                |                                                   |                    |            |                        |                                                              | Relative methylation (Cy5/Cy3) | Cy3 signal (Input) | Cy5 signal (MeDIP) | Relative methylation (Cy5/Cy3) | Cy3 signal (Input) | Cy5 signal (MeDIP) |
| A_68_P27234933 | chr10:70807476-70807520                           | NM_134007:99       | Cisd1      | INSIDE                 | 0.655                                                        | 3.491                          | 1438.08            | 5020.46            | 2.288                          | 1129.33            | 2584.26            |
| A_68_P28052070 | chr11:97547153-97547197                           | NM_001085500:-91   | Cisd3      | PROMOTER               | 0.375                                                        | 1.802                          | 2334.04            | 4206.95            | 0.676                          | 1966.90            | 1329.85            |
| A_68_P26807591 | chr9:107199190-107199234                          | NM_009895:193      | Cish       | INSIDE                 | 0.309                                                        | 0.598                          | 6240.39            | 3729.34            | 0.184                          | 4222.62            | 778.53             |
| A_68_P32567806 | chrX:99447101-99447145                            | NM_007709:-14      | Cited1     | PROMOTER               | 0.55                                                         | 5.564                          | 479.11             | 2665.96            | 3.058                          | 586.55             | 1793.95            |
| A_68_P26971606 | chr10:17444088-17444133                           | NM_010828:1077     | Cited2     | INSIDE                 | 0.458                                                        | 0.391                          | 1522.39            | 595.71             | 0.179                          | 1010.69            | 181.05             |
| A_68_P23288133 | chr4:127648899-127648943                          | NM_001134733:-835  | CK137956   | PROMOTER               | 0.388                                                        | 0.268                          | 2588.21            | 692.48             | 0.104                          | 1849.44            | 191.92             |
| A_68_P28745339 | chr12:112908725-112908769                         | NM_021273:1803     | Ckb        | INSIDE                 | 0.464                                                        | 7.542                          | 2147.92            | 16198.93           | 3.5                            | 1807.59            | 6326.02            |
| A_68_P28745353 | chr12:112910255-112910299                         | NM_021273:273      | Ckb        | INSIDE                 | 0.497                                                        | 0.262                          | 8085.06            | 2116.61            | 0.13                           | 5343.46            | 694.56             |
| A_68_P28745355 | chr12:112910496-112910540                         | NM_021273:31       | Ckb        | INSIDE                 | 0.639                                                        | 2.904                          | 2004.53            | 5821.22            | 1.855                          | 1646.20            | 3052.88            |
| A_68_P28745354 | chr12:112910412-112910456                         | NM_021273:115      | Ckb        | INSIDE                 | 0.462                                                        | 1.540                          | 3097.84            | 4771.33            | 0.711                          | 2580.27            | 1835.70            |
| A_68_P21580440 | chr2:121180697-121180741                          | NM_009897:-3658    | Ckmt1      | DIVERGENT_PROMOTER     | 0.537                                                        | 6.913                          | 2733.57            | 18898.18           | 3.71                           | 1566.55            | 5811.17            |
| A_68_P29033454 | chr13:51740459-51740503                           | NM_025415:-120     | Cks2       | PROMOTER               | 0.18                                                         | 0.543                          | 2496.49            | 1356.80            | 0.098                          | 1760.81            | 172.33             |
| A_68_P26841767 | chr9:113650601-113650645                          | NM_001114347:32    | Clasp2     | INSIDE                 | 0.266                                                        | 9.827                          | 1380.42            | 13565.72           | 2.611                          | 1168.93            | 3051.83            |
| A_68_P24994312 | chr7:20189858-20189902                            | NM_016680:-63      | Clasrp     | PROMOTER               | 0.415                                                        | 0.269                          | 2159.03            | 581.13             | 0.112                          | 1562.07            | 174.37             |
| A_68_P31921839 | chr19:4214705-4214749                             | NM_019952:335      | Clcf1      | INSIDE                 | 0.354                                                        | 5.413                          | 1299.54            | 7034.23            | 1.915                          | 1037.92            | 1987.98            |
| A_68_P30589167 | chr16:20716459-20716503                           | NM_009900:229      | Clcn2      | INSIDE                 | 0.122                                                        | 2.700                          | 3186.61            | 8603.47            | 0.33                           | 2661.02            | 879.46             |
| A_68_P30589168 | chr16:20716549-20716593                           | NM_009900:139      | Clcn2      | INSIDE                 | 0.447                                                        | 0.363                          | 1396.04            | 506.69             | 0.162                          | 1075.87            | 174.38             |
| A_68_P30589171 | chr16:20717229-20717273                           | NM_009900:-541     | Clcn2      | DIVERGENT_PROMOTER     | 0.471                                                        | 0.429                          | 1055.51            | 452.69             | 0.202                          | 879.81             | 177.83             |
| A_68_P30589166 | chr16:20716372-20716416                           | NM_009900:315      | Clcn2      | INSIDE                 | 0.595                                                        | 2.959                          | 1623.12            | 4802.69            | 1.759                          | 1355.77            | 2385.31            |
| A_68_P22032039 | chr3:31048745-31048789                            | NM_008770:-75      | Cldn11     | PROMOTER               | 0.606                                                        | 2.931                          | 1363.77            | 3997.45            | 1.776                          | 1185.15            | 2105.37            |
| A_68_P25782096 | chr8:36889804-36889848                            | NM_027998:-213     | Cldn23     | PROMOTER               | 0.467                                                        | 4.831                          | 6820.01            | 32944.96           | 2.256                          | 5433.60            | 12257.29           |
| A_68_P25782094 | chr8:36889597-36889641                            | NM_027998:-5       | Cldn23     | PROMOTER               | 0.576                                                        | 0.500                          | 1543.93            | 771.91             | 0.288                          | 1194.16            | 343.63             |
| A_68_P25782091 | chr8:36889227-36889271                            | NM_027998:365      | Cldn23     | INSIDE                 | 0.6                                                          | 2.957                          | 1803.52            | 5332.79            | 1.773                          | 1369.75            | 2429.21            |
| A_68_P30532562 | chr16:8424938-8424982                             | NM_029070:269      | Cldn26     | INSIDE                 | 0.568                                                        | 0.299                          | 2986.64            | 893.69             | 0.17                           | 2267.53            | 385.16             |
| A_68_P28167619 | chr11:117721965-117722009                         | NM_001085535:-79   | Cldn27     | PROMOTER               | 0.646                                                        | 0.597                          | 4671.79            | 2786.95            | 0.386                          | 3294.92            | 1270.53            |
| A_68_P31092997 | chr17:23816594-23816638                           | NM_018777:285      | Cldn6      | INSIDE                 | 0.482                                                        | 4.770                          | 6391.03            | 30484.22           | 2.299                          | 4978.32            | 11444.50           |
| A_68_P31092996 | chr17:23816488-23816532                           | NM_018777:179      | Cldn6      | INSIDE                 | 0.527                                                        | 0.490                          | 1872.79            | 916.88             | 0.258                          | 1381.95            | 356.24             |
| A_68_P27898212 | chr11:69779612-69779656                           | NM_016887:712      | Cldn7      | INSIDE                 | 0.408                                                        | 1.534                          | 2007.95            | 3080.75            | 0.627                          | 1414.57            | 886.36             |
| A_68_P25086655 | chr7:51560012-51560056                            | NM_009131:2295     | Clec11a    | INSIDE                 | 0.402                                                        | 0.549                          | 1858.03            | 1020.11            | 0.221                          | 1380.21            | 304.43             |
| A_68_P30542887 | chr16:10545493-10545537                           | NM_001204229:83    | Clec16a    | INSIDE                 | 0.393                                                        | 6.343                          | 2057.42            | 13050.23           | 2.496                          | 1789.89            | 4466.92            |
| A_68_P26014851 | chr8:85913804-85913848                            | NM_009904:37       | Clgn       | INSIDE                 | 0.609                                                        | 3.908                          | 806.96             | 3153.22            | 2.381                          | 670.02             | 1595.30            |
| A_68_P23327642 | chr4:134829090-134829134                          | NM_013885:-437     | Clie4      | PROMOTER               | 0.564                                                        | 5.912                          | 1268.14            | 7497.23            | 3.333                          | 1249.64            | 4164.84            |
| A_68_P27764454 | chr11:45665659-45665703                           | NM_001045520:215   | Clint1     | INSIDE                 | 0.475                                                        | 1.393                          | 3332.51            | 4640.75            | 0.662                          | 2648.29            | 1752.98            |
| A_68_P24057001 | chr5:124133506-124133550                          | NM_019765:772      | Clip1      | INSIDE                 | 0.572                                                        | 3.698                          | 5331.94            | 19716.75           | 2.114                          | 4202.14            | 8884.08            |
| A_68_P24057004 | chr5:124133945-124133989                          | NM_019765:334      | Clip1      | INSIDE                 | 0.35                                                         | 5.488                          | 1085.41            | 5956.87            | 1.92                           | 864.33             | 1659.93            |
| A_68_P32982272 | chr5:134998625-134998669                          | NM_001039162:29658 | Clip2      | INSIDE                 | 0.274                                                        | 5.767                          | 2497.08            | 14399.56           | 1.579                          | 1938.66            | 3061.94            |
| A_68_P31336383 | chr17:72132310-72132354                           | NM_030179:1046     | Clip4      | INSIDE                 | 0.536                                                        | 0.541                          | 1521.03            | 822.60             | 0.29                           | 1263.69            | 366.62             |
| A_68_P20258855 | chr1:58480898-58480942                            | NM_001042634:12    | Clk1       | INSIDE                 | 0.436                                                        | 4.060                          | 1682.10            | 6829.52            | 1.77                           | 1490.74            | 2638.08            |
| A_68_P20258853 | chr1:58480687-58480731                            | NM_001042634:224   | Clk1       | INSIDE                 | 0.471                                                        | 4.268                          | 1079.78            | 4608.42            | 2.012                          | 956.84             | 1924.96            |
| A_68_P20258850 | chr1:58480309-58480353                            | NM_001042634:602   | Clk1       | INSIDE                 | 0.388                                                        | 4.152                          | 1438.40            | 5971.80            | 1.61                           | 1153.62            | 1857.30            |
| A_68_P22317616 | chr3:88973234-88973282                            | NM_001163432:4532  | Clk2       | INSIDE                 | 0.102                                                        | 4.108                          | 2203.31            | 9050.60            | 0.419                          | 1377.36            | 577.78             |
| A_68_P22317617 | chr3:88973343-88973387                            | NM_001163432:4638  | Clk2       | INSIDE                 | 0.153                                                        | 21.217                         | 5983.30            | 126945.30          | 3.247                          | 4438.93            | 14415.22           |
| A_68_P26543679 | chr9:57613020-57613064                            | NM_007713:625      | Clk3       | INSIDE                 | 0.451                                                        | 4.776                          | 804.81             | 3843.78            | 2.153                          | 721.45             | 1553.38            |
| A_68_P26543678 | chr9:57612898-57612942                            | NM_007713:747      | Clk3       | INSIDE                 | 0.275                                                        | 5.359                          | 5466.59            | 29296.49           | 1.471                          | 4415.23            | 6495.47            |
| A_68_P23815279 | chr5:76733734-76733778                            | NM_007715:-183     | Clock      | PROMOTER               | 0.66                                                         | 4.034                          | 1714.98            | 6917.85            | 2.661                          | 1345.48            | 3579.90            |
| A_68_P31259429 | chr17:57129711-57129755                           | NM_017393:46       | Clpp       | INSIDE                 | 0.269                                                        | 0.583                          | 5506.01            | 3210.25            | 0.157                          | 3256.79            | 511.05             |

| ProbeName      | Target position of probe on CpG island microarray | TargetID          | GeneSymbol | CpG island Description | Ratio of relative methylation (TiO <sub>2</sub> -NP/Vehicle) | Sham group                     |                    |                    | TiO <sub>2</sub> -H group      |                    |                    |
|----------------|---------------------------------------------------|-------------------|------------|------------------------|--------------------------------------------------------------|--------------------------------|--------------------|--------------------|--------------------------------|--------------------|--------------------|
|                |                                                   |                   |            |                        |                                                              | Relative methylation (Cy5/Cy3) | Cy3 signal (Input) | Cy5 signal (MeDIP) | Relative methylation (Cy5/Cy3) | Cy3 signal (Input) | Cy5 signal (MeDIP) |
| A_68_P31259430 | chr17:57129793-57129837                           | NM_017393:128     | Clpp       | INSIDE                 | 0.417                                                        | 0.283                          | 6239.03            | 1767.49            | 0.118                          | 3678.62            | 434.71             |
| A_68_P29140850 | chr13:73741332-73741376                           | NM_146047:-95     | Clptm11    | PROMOTER               | 0.615                                                        | 2.555                          | 1141.70            | 2917.23            | 1.572                          | 969.04             | 1523.07            |
| A_68_P23280756 | chr4:126234616-126234660                          | NM_175554:415     | Clspn      | INSIDE                 | 0.591                                                        | 3.232                          | 793.34             | 2564.21            | 1.911                          | 713.57             | 1363.84            |
| A_68_P23401328 | chr4:148961215-148961259                          | NM_023051:490     | Clstn1     | INSIDE                 | 0.185                                                        | 0.555                          | 9072.90            | 5039.10            | 0.103                          | 5621.25            | 576.61             |
| A_68_P23401326 | chr4:148961050-148961094                          | NM_023051:326     | Clstn1     | INSIDE                 | 0.324                                                        | 0.565                          | 4538.99            | 2564.66            | 0.183                          | 3241.64            | 593.16             |
| A_68_P23401329 | chr4:148961308-148961352                          | NM_023051:584     | Clstn1     | INSIDE                 | 0.375                                                        | 0.490                          | 8432.45            | 4128.96            | 0.184                          | 5447.48            | 999.73             |
| A_68_P23401327 | chr4:148961132-148961176                          | NM_023051:408     | Clstn1     | INSIDE                 | 0.452                                                        | 0.201                          | 3902.60            | 783.83             | 0.091                          | 2664.89            | 242.11             |
| A_68_P26756440 | chr9:97933663-97933707                            | NM_022319:-98     | Clstn2     | PROMOTER               | 0.332                                                        | 33.861                         | 2789.71            | 94462.64           | 11.256                         | 2462.18            | 27714.81           |
| A_68_P26756438 | chr9:97933240-97933284                            | NM_022319:324     | Clstn2     | INSIDE                 | 0.339                                                        | 5.591                          | 1388.36            | 7762.97            | 1.893                          | 1140.63            | 2159.72            |
| A_68_P26756442 | chr9:97933946-97933990                            | NM_022319:-382    | Clstn2     | PROMOTER               | 0.47                                                         | 0.571                          | 831.25             | 474.99             | 0.269                          | 648.72             | 174.30             |
| A_68_P27990839 | chr11:86571533-86571577                           | NM_001003908:-560 | Cltc       | PROMOTER               | 0.238                                                        | 8.470                          | 1076.10            | 9114.69            | 2.014                          | 922.78             | 1858.24            |
| A_68_P23999133 | chr5:114064391-114064435                          | NM_008153:35987   | Cmklr1     | INSIDE                 | 0.122                                                        | 28.317                         | 1150.67            | 32583.08           | 3.456                          | 798.90             | 2760.64            |
| A_68_P23999132 | chr5:114064289-114064333                          | NM_008153:36089   | Cmklr1     | INSIDE                 | 0.376                                                        | 4.560                          | 3715.75            | 16942.92           | 1.715                          | 2530.47            | 4339.33            |
| A_68_P23222742 | chr4:114659539-114659583                          | NM_025647:273     | Cmpk1      | INSIDE                 | 0.321                                                        | 11.746                         | 1689.66            | 19846.54           | 3.774                          | 1589.94            | 6001.18            |
| A_68_P28302020 | chr12:27154103-27154147                           | NM_020557:45      | Cmpk2      | INSIDE                 | 0.422                                                        | 0.412                          | 2163.40            | 891.13             | 0.174                          | 1494.19            | 259.60             |
| A_68_P28302019 | chr12:27154024-27154068                           | NM_020557:-33     | Cmpk2      | PROMOTER               | 0.653                                                        | 0.432                          | 2601.04            | 1122.67            | 0.282                          | 1689.00            | 476.26             |
| A_68_P26127987 | chr8:106864391-106864435                          | NM_024217:-81     | Cmtm3      | PROMOTER               | 0.245                                                        | 5.685                          | 10857.31           | 61723.59           | 1.395                          | 7671.92            | 10705.32           |
| A_68_P26128337 | chr8:106919324-106919368                          | NM_153582:250     | Cmtm4      | INSIDE                 | 0.356                                                        | 14.908                         | 2970.15            | 44280.27           | 5.309                          | 2695.43            | 14309.10           |
| A_68_P26846253 | chr9:114662207-114662251                          | NM_133978:28719   | Cmtm7      | DOWNSTREAM             | 0.653                                                        | 0.440                          | 1337.28            | 588.47             | 0.287                          | 1096.59            | 315.15             |
| A_68_P26846741 | chr9:114753280-114753324                          | NM_027294:-32     | Cmtm8      | PROMOTER               | 0.138                                                        | 25.836                         | 9389.88            | 242598.20          | 3.554                          | 8466.36            | 30093.45           |
| A_68_P24618503 | chr6:87800411-87800455                            | NM_001109745:668  | Cnbp       | INSIDE                 | 0.382                                                        | 6.101                          | 2485.88            | 15165.54           | 2.331                          | 2027.45            | 4726.63            |
| A_68_P32769557 | chrX:154481653-154481697                          | NM_177751:-632    | Cnksr2     | PROMOTER               | 0.491                                                        | 4.427                          | 754.91             | 3342.24            | 2.175                          | 968.80             | 2107.04            |
| A_68_P32769550 | chrX:154480805-154480849                          | NM_177751:216     | Cnksr2     | INSIDE                 | 0.544                                                        | 4.754                          | 1073.72            | 5104.61            | 2.585                          | 1265.68            | 3271.24            |
| A_68_P26898893 | chr10:3134939-3134983                             | NM_172546:657     | Cnksr3     | INSIDE                 | 0.444                                                        | 5.557                          | 3899.65            | 21668.81           | 2.469                          | 3117.65            | 7695.93            |
| A_68_P22476389 | chr3:121130415-121130465                          | NM_028044:982     | Cnn3       | INSIDE                 | 0.215                                                        | 0.476                          | 2271.50            | 1081.74            | 0.102                          | 1697.24            | 173.40             |
| A_68_P22476384 | chr3:121129828-121129872                          | NM_028044:392     | Cnn3       | INSIDE                 | 0.418                                                        | 0.453                          | 1077.59            | 488.04             | 0.189                          | 913.46             | 172.73             |
| A_68_P32126462 | chr19:43515774-43515818                           | NM_031396:871     | Cnnm1      | INSIDE                 | 0.471                                                        | 5.112                          | 1493.31            | 7634.49            | 2.408                          | 1289.75            | 3105.85            |
| A_68_P32145765 | chr19:46837310-46837354                           | NM_001102471:1234 | Cnnm2      | INSIDE                 | 0.554                                                        | 0.347                          | 1495.05            | 519.05             | 0.192                          | 1172.44            | 225.51             |
| A_68_P20148714 | chr1:36568619-36568663                            | NM_001039551:-80  | Cnnm3      | PROMOTER               | 0.147                                                        | 53.745                         | 8553.61            | 459710.80          | 7.899                          | 9888.23            | 78110.30           |
| A_68_P20148715 | chr1:36568684-36568728                            | NM_001039551:-14  | Cnnm3      | PROMOTER               | 0.34                                                         | 6.224                          | 3580.69            | 22287.92           | 2.117                          | 2613.07            | 5532.29            |
| A_68_P20148721 | chr1:36569446-36569490                            | NM_001039551:748  | Cnnm3      | INSIDE                 | 0.421                                                        | 12.690                         | 2248.52            | 28533.62           | 5.339                          | 1820.57            | 9719.42            |
| A_68_P20148716 | chr1:36568774-36568818                            | NM_001039551:76   | Cnnm3      | INSIDE                 | 0.559                                                        | 3.388                          | 3198.55            | 10837.29           | 1.895                          | 2497.08            | 4732.09            |
| A_68_P20148457 | chr1:36528751-36528795                            | NM_033570:331     | Cnnm4      | INSIDE                 | 0.47                                                         | 0.199                          | 2690.54            | 535.59             | 0.094                          | 1909.55            | 178.61             |
| A_68_P23609441 | chr5:37139453-37139497                            | NM_133724:444     | Cno        | INSIDE                 | 0.415                                                        | 0.321                          | 1672.99            | 537.77             | 0.133                          | 1282.50            | 170.96             |
| A_68_P26085422 | chr8:98331940-98331984                            | NM_001205226:-600 | Cnot1      | PROMOTER               | 0.572                                                        | 0.269                          | 2060.03            | 555.07             | 0.154                          | 1537.27            | 237.03             |
| A_68_P26085416 | chr8:98331248-98331292                            | NM_001205226:92   | Cnot1      | INSIDE                 | 0.587                                                        | 0.318                          | 2656.50            | 844.06             | 0.187                          | 1989.52            | 371.18             |
| A_68_P27476522 | chr10:116018238-116018282                         | NM_001037846:307  | Cnot2      | INSIDE                 | 0.25                                                         | 35.363                         | 10319.36           | 364919.10          | 8.84                           | 9606.38            | 84917.08           |
| A_68_P27476528 | chr10:116018985-116019029                         | NM_001037846:-439 | Cnot2      | PROMOTER               | 0.295                                                        | 10.315                         | 4469.24            | 46099.31           | 3.044                          | 3634.81            | 11065.81           |
| A_68_P27476526 | chr10:116018789-116018833                         | NM_001037846:-243 | Cnot2      | PROMOTER               | 0.381                                                        | 6.842                          | 2068.31            | 14151.48           | 2.606                          | 1808.40            | 4712.06            |
| A_68_P27476525 | chr10:116018687-116018731                         | NM_001037846:-141 | Cnot2      | PROMOTER               | 0.518                                                        | 6.007                          | 1004.07            | 6031.24            | 3.114                          | 816.20             | 2541.68            |
| A_68_P24946543 | chr7:3597351-3597395                              | NM_146176:502     | Cnot3      | INSIDE                 | 0.545                                                        | 3.710                          | 1058.64            | 3927.99            | 2.023                          | 767.05             | 1551.76            |
| A_68_P24359955 | chr6:35083485-35083529                            | NM_001164412:231  | Cnot4      | INSIDE                 | 0.32                                                         | 9.001                          | 4380.46            | 39426.65           | 2.885                          | 3727.15            | 10751.57           |
| A_68_P24359954 | chr6:35083412-35083456                            | NM_001164412:303  | Cnot4      | INSIDE                 | 0.091                                                        | 1.468                          | 6620.02            | 9718.59            | 0.134                          | 5135.84            | 688.94             |
| A_68_P27784449 | chr11:49525483-49525527                           | NM_212484:708     | Cnot6      | INSIDE                 | 0.311                                                        | 10.907                         | 1296.44            | 14139.88           | 3.391                          | 1163.69            | 3946.21            |
| A_68_P27784450 | chr11:49525550-49525594                           | NM_212484:640     | Cnot6      | INSIDE                 | 0.377                                                        | 7.166                          | 3749.64            | 26870.29           | 2.704                          | 3498.92            | 9461.34            |
| A_68_P25806164 | chr8:41596758-41596802                            | NM_011135:-122    | Cnot7      | DIVERGENT_PROMOTER     | 0.374                                                        | 5.277                          | 7277.81            | 38406.40           | 1.975                          | 5881.19            | 11614.18           |

| ProbeName      | Target position of probe on CpG island microarray | TargetID             | GeneSymbol | CpG island Description | Ratio of relative methylation (TiO <sub>2</sub> -NP/Vehicle) | Sham group                     |                    |                    | TiO <sub>2</sub> -H group      |                    |                    |
|----------------|---------------------------------------------------|----------------------|------------|------------------------|--------------------------------------------------------------|--------------------------------|--------------------|--------------------|--------------------------------|--------------------|--------------------|
|                |                                                   |                      |            |                        |                                                              | Relative methylation (Cy5/Cy3) | Cy3 signal (Input) | Cy5 signal (MeDIP) | Relative methylation (Cy5/Cy3) | Cy3 signal (Input) | Cy5 signal (MeDIP) |
| A_68_P25806160 | chr8:41596401-41596445                            | NM_011135:236        | Cnot7      | INSIDE                 | 0.522                                                        | 0.339                          | 1671.34            | 566.07             | 0.177                          | 1361.00            | 240.82             |
| A_68_P27829185 | chr11:57917595-57917639                           | NM_026949:-38        | Cnot8      | PROMOTER               | 0.381                                                        | 0.725                          | 1390.64            | 1008.02            | 0.276                          | 1032.50            | 285.22             |
| A_68_P23331196 | chr4:135472765-135472809                          | NM_009924:21468      | Cnr2       | INSIDE                 | 0.573                                                        | 3.854                          | 1697.83            | 6542.76            | 2.209                          | 1204.66            | 2661.27            |
| A_68_P20870811 | chr1:181476719-181476763                          | NM_146105:81         | Cnst       | INSIDE                 | 0.252                                                        | 8.999                          | 808.98             | 7279.70            | 2.265                          | 745.23             | 1687.62            |
| A_68_P20622147 | chr1:134439405-134439449                          | NM_177129:91         | Cntn2      | INSIDE                 | 0.276                                                        | 22.365                         | 3072.57            | 68716.84           | 6.173                          | 2941.38            | 18155.92           |
| A_68_P24420943 | chr6:46994568-46994616                            | NM_001004357:1984533 | Cntnap2    | INSIDE                 | 0.241                                                        | 9.092                          | 1945.05            | 17684.66           | 2.191                          | 1615.76            | 3540.06            |
| A_68_P21285107 | chr2:65077163-65077207                            | NM_027225:-501       | Cobll1     | PROMOTER               | 0.213                                                        | 18.146                         | 4617.47            | 83790.16           | 3.867                          | 4516.59            | 17466.60           |
| A_68_P21070564 | chr2:25066622-25066666                            | NM_021393:365        | Cobra1     | INSIDE                 | 0.393                                                        | 0.457                          | 1458.48            | 665.81             | 0.179                          | 1024.58            | 183.69             |
| A_68_P21070567 | chr2:25066910-25066954                            | NM_021393:77         | Cobra1     | INSIDE                 | 0.597                                                        | 0.575                          | 3177.80            | 1827.48            | 0.343                          | 2458.42            | 843.38             |
| A_68_P28430598 | chr12:52694641-52694685                           | NM_001198835:335     | Coch       | INSIDE                 | 0.354                                                        | 4.228                          | 1870.62            | 7908.91            | 1.496                          | 1593.10            | 2383.37            |
| A_68_P28003125 | chr11:88835210-88835254                           | NM_016706:-16        | Coil       | PROMOTER               | 0.616                                                        | 4.857                          | 1558.49            | 7569.01            | 2.993                          | 1235.06            | 3696.92            |
| A_68_P26665705 | chr9:79566838-79566882                            | NM_007730:-375       | Coll2a1    | PROMOTER               | 0.66                                                         | 0.356                          | 3419.79            | 1215.85            | 0.235                          | 2331.35            | 546.71             |
| A_68_P27183504 | chr10:61441353-61441397                           | NM_007731:482        | Coll3a1    | INSIDE                 | 0.635                                                        | 3.917                          | 1082.03            | 4238.72            | 2.489                          | 889.24             | 2213.29            |
| A_68_P27183499 | chr10:61440751-61440795                           | NM_007731:1084       | Coll3a1    | INSIDE                 | 0.567                                                        | 0.745                          | 6336.51            | 4717.80            | 0.422                          | 4589.36            | 1936.48            |
| A_68_P27183508 | chr10:61441806-61441850                           | NM_007731:28         | Coll3a1    | INSIDE                 | 0.541                                                        | 2.633                          | 2851.75            | 7509.57            | 1.424                          | 2233.02            | 3180.27            |
| A_68_P23299955 | chr4:129724973-129725017                          | NM_028266:-89        | Coll6a1    | PROMOTER               | 0.299                                                        | 11.884                         | 2579.09            | 30649.72           | 3.549                          | 2153.75            | 7643.56            |
| A_68_P23299954 | chr4:129724880-129724924                          | NM_028266:-181       | Coll6a1    | PROMOTER               | 0.319                                                        | 9.168                          | 684.64             | 6276.43            | 2.923                          | 600.23             | 1754.49            |
| A_68_P27793111 | chr11:51103960-51104004                           | NM_153393:561        | Col23a1    | INSIDE                 | 0.212                                                        | 0.627                          | 1859.33            | 1166.27            | 0.133                          | 1291.11            | 171.64             |
| A_68_P22524273 | chr3:129883661-129883705                          | NM_029838:-113       | Col25a1    | PROMOTER               | 0.376                                                        | 15.912                         | 645.29             | 10268.04           | 5.975                          | 551.56             | 3295.72            |
| A_68_P22968875 | chr4:62875286-62875330                            | NM_025685:-1137      | Col27a1    | PROMOTER               | 0.583                                                        | 3.636                          | 824.31             | 2997.58            | 2.12                           | 632.57             | 1340.96            |
| A_68_P29246777 | chr13:97312887-97312931                           | NM_001164222:219     | Col4a3bp   | INSIDE                 | 0.485                                                        | 0.545                          | 2702.94            | 1473.11            | 0.264                          | 2120.87            | 560.33             |
| A_68_P21087493 | chr2:27741935-27741979                            | NM_015734:12         | Col5a1     | INSIDE                 | 0.575                                                        | 0.536                          | 1990.06            | 1066.76            | 0.308                          | 1391.19            | 428.67             |
| A_68_P21087491 | chr2:27741628-27741672                            | NM_015734:-294       | Col5a1     | PROMOTER               | 0.647                                                        | 0.529                          | 1285.82            | 680.59             | 0.342                          | 997.70             | 341.60             |
| A_68_P21087494 | chr2:27742066-27742110                            | NM_015734:144        | Col5a1     | INSIDE                 | 0.428                                                        | 1.639                          | 4657.08            | 7633.80            | 0.702                          | 3166.63            | 2223.19            |
| A_68_P27263162 | chr10:76086244-76086288                           | NM_146007:-117       | Col6a2     | PROMOTER               | 0.483                                                        | 4.836                          | 940.38             | 4547.50            | 2.334                          | 824.88             | 1925.64            |
| A_68_P27262976 | chr10:76059601-76059649                           | NM_146007:26525      | Col6a2     | INSIDE                 | 0.353                                                        | 1.400                          | 926.50             | 1296.82            | 0.494                          | 789.43             | 390.20             |
| A_68_P23279249 | chr4:125963943-125963987                          | NM_199473:-73        | Col8a2     | PROMOTER               | 0.267                                                        | 7.355                          | 2163.60            | 15913.90           | 1.961                          | 2144.70            | 4205.26            |
| A_68_P23279343 | chr4:125978444-125978488                          | NM_199473:14429      | Col8a2     | INSIDE                 | 0.516                                                        | 2.939                          | 1725.82            | 5072.00            | 1.515                          | 1318.90            | 1998.34            |
| A_68_P21904962 | chr2:180333066-180333110                          | NM_009936:162        | Col9a3     | INSIDE                 | 0.474                                                        | 0.392                          | 3098.35            | 1215.61            | 0.186                          | 2115.61            | 393.71             |
| A_68_P27643714 | chr11:22882221-22882265                           | NM_144514:42         | Commd1     | INSIDE                 | 0.62                                                         | 2.866                          | 635.28             | 1820.92            | 1.778                          | 571.21             | 1015.76            |
| A_68_P22164786 | chr3:57455644-57455688                            | NM_175095:-60        | Commd2     | PROMOTER               | 0.575                                                        | 0.620                          | 1422.07            | 881.26             | 0.357                          | 1039.92            | 370.74             |
| A_68_P21040743 | chr2:18593952-18593996                            | NM_147778:-114       | Commd3     | PROMOTER               | 0.553                                                        | 3.680                          | 3026.88            | 11139.86           | 2.035                          | 2676.80            | 5446.39            |
| A_68_P29856057 | chr14:102039624-102039668                         | NM_001033132:42      | Commd6     | INSIDE                 | 0.565                                                        | 0.227                          | 4880.28            | 1105.73            | 0.128                          | 3573.80            | 457.81             |
| A_68_P25951429 | chr8:72897357-72897401                            | NM_016685:-68        | Comp       | PROMOTER               | 0.497                                                        | 7.744                          | 1581.14            | 12244.55           | 3.85                           | 1418.29            | 5460.90            |
| A_68_P25951452 | chr8:72900302-72900346                            | NM_016685:2878       | Comp       | INSIDE                 | 0.497                                                        | 0.386                          | 1191.54            | 460.44             | 0.192                          | 899.04             | 172.76             |
| A_68_P25951438 | chr8:72898648-72898692                            | NM_016685:1224       | Comp       | INSIDE                 | 0.613                                                        | 2.495                          | 1300.02            | 3243.24            | 1.531                          | 1136.70            | 1739.75            |
| A_68_P29455231 | chr14:22667975-22668019                           | NM_026965:136        | Comtd1     | INSIDE                 | 0.324                                                        | 5.101                          | 13572.84           | 69239.50           | 1.655                          | 10709.60           | 17728.26           |
| A_68_P21605247 | chr2:125684679-125684728                          | NM_009939:51         | Cops2      | INSIDE                 | 0.551                                                        | 0.512                          | 996.58             | 510.17             | 0.282                          | 619.08             | 174.72             |
| A_68_P23930021 | chr5:100947315-100947359                          | NM_012001:9          | Cops4      | INSIDE                 | 0.54                                                         | 0.497                          | 1275.82            | 633.90             | 0.268                          | 1046.68            | 280.64             |
| A_68_P20412924 | chr1:88483955-88483999                            | NM_172974:302        | Cops7b     | INSIDE                 | 0.363                                                        | 0.689                          | 1117.63            | 770.04             | 0.25                           | 870.11             | 217.38             |
| A_68_P20437267 | chr1:92500071-92500115                            | NM_133805:93         | Cops8      | INSIDE                 | 0.467                                                        | 12.001                         | 2580.78            | 30972.15           | 5.609                          | 2413.45            | 13537.29           |
| A_68_P28047199 | chr11:96723478-96723522                           | NM_019877:12311      | Copz2      | DOWNSTREAM             | 0.219                                                        | 9.588                          | 960.82             | 9212.25            | 2.097                          | 761.33             | 1596.31            |
| A_68_P23792212 | chr5:72895290-72895334                            | NM_016869:135        | Corin      | INSIDE                 | 0.466                                                        | 0.483                          | 1577.35            | 761.91             | 0.225                          | 1077.74            | 242.51             |
| A_68_P23792211 | chr5:72895109-72895153                            | NM_016869:317        | Corin      | INSIDE                 | 0.462                                                        | 3.399                          | 1684.48            | 5725.86            | 1.569                          | 1283.92            | 2014.33            |
| A_68_P24000798 | chr5:114359230-114359275                          | NM_011779:-537       | Coro1c     | PROMOTER               | 0.359                                                        | 14.040                         | 9000.69            | 126373.00          | 5.041                          | 7623.85            | 38435.22           |
| A_68_P24000794 | chr5:114358647-114358691                          | NM_011779:47         | Coro1c     | INSIDE                 | 0.443                                                        | 5.639                          | 2221.54            | 12528.31           | 2.499                          | 1889.25            | 4721.27            |

| ProbeName      | Target position of probe on CpG island microarray | TargetID           | GeneSymbol | CpG island Description | Ratio of relative methylation (TiO <sub>2</sub> -NP/Vehicle) | Sham group                     |                    |                    | TiO <sub>2</sub> -H group      |                    |                    |
|----------------|---------------------------------------------------|--------------------|------------|------------------------|--------------------------------------------------------------|--------------------------------|--------------------|--------------------|--------------------------------|--------------------|--------------------|
|                |                                                   |                    |            |                        |                                                              | Relative methylation (Cy5/Cy3) | Cy3 signal (Input) | Cy5 signal (MeDIP) | Relative methylation (Cy5/Cy3) | Cy3 signal (Input) | Cy5 signal (MeDIP) |
| A_68_P24000793 | chr5:114358500-114358544                          | NM_011779:193      | Coro1c     | INSIDE                 | 0.609                                                        | 4.335                          | 673.23             | 2918.43            | 2.639                          | 607.73             | 1603.97            |
| A_68_P22889573 | chr4:46614584-46614628                            | NM_001164804:195   | Coro2a     | INSIDE                 | 0.629                                                        | 0.499                          | 1896.20            | 947.07             | 0.314                          | 1537.99            | 483.45             |
| A_68_P27937736 | chr11:77281473-77281517                           | NM_139128:4080     | Coro6      | INSIDE                 | 0.577                                                        | 2.733                          | 1407.73            | 3847.59            | 1.576                          | 1199.36            | 1890.23            |
| A_68_P30511525 | chr16:4679878-4679922                             | NM_030205:-180     | Coro7      | DIVERGENT_PROMOTER     | 0.658                                                        | 0.524                          | 1314.65            | 689.12             | 0.345                          | 1077.06            | 371.23             |
| A_68_P24135004 | chr5:139821148-139821192                          | NM_197980:-50      | Cox19      | DIVERGENT_PROMOTER     | 0.392                                                        | 0.347                          | 4683.33            | 1626.61            | 0.136                          | 3200.10            | 436.18             |
| A_68_P26221734 | chr8:123191897-123191941                          | NM_010926:94       | Cox4nb     | INSIDE                 | 0.205                                                        | 8.958                          | 6349.71            | 56880.71           | 1.838                          | 5333.04            | 9802.11            |
| A_68_P26542213 | chr9:57368982-57369026                            | NM_007747:-34      | Cox5a      | PROMOTER               | 0.336                                                        | 0.640                          | 893.71             | 572.22             | 0.215                          | 789.51             | 169.97             |
| A_68_P26542218 | chr9:57369471-57369515                            | NM_007747:454      | Cox5a      | INSIDE                 | 0.438                                                        | 0.605                          | 854.24             | 517.19             | 0.265                          | 745.01             | 197.54             |
| A_68_P20149813 | chr1:36748609-36748653                            | NM_009942:299      | Cox5b      | INSIDE                 | 0.62                                                         | 0.676                          | 1744.61            | 1179.52            | 0.419                          | 1440.90            | 604.23             |
| A_68_P24009173 | chr5:115798570-115798614                          | NM_007748:372      | Cox6a1     | INSIDE                 | 0.66                                                         | 0.445                          | 2490.70            | 1109.55            | 0.294                          | 1901.17            | 558.97             |
| A_68_P30136000 | chr15:35867909-35867953                           | NM_053071:71       | Cox6c      | INSIDE                 | 0.576                                                        | 0.439                          | 1678.13            | 736.16             | 0.253                          | 1203.89            | 304.24             |
| A_68_P26665914 | chr9:79607348-79607392                            | NM_009945:290      | Cox7a2     | INSIDE                 | 0.573                                                        | 0.372                          | 2132.08            | 792.21             | 0.213                          | 1535.77            | 327.09             |
| A_68_P27934410 | chr11:76660169-76660213                           | NM_007754:320      | Cpd        | INSIDE                 | 0.641                                                        | 3.807                          | 916.74             | 3490.16            | 2.441                          | 883.87             | 2157.37            |
| A_68_P23644443 | chr5:43625072-43625116                            | NM_001177379:393   | Cpeb2      | INSIDE                 | 0.328                                                        | 14.119                         | 2221.31            | 31363.58           | 4.634                          | 2143.06            | 9930.64            |
| A_68_P32094201 | chr19:37249291-37249335                           | NM_198300:32471    | Cpeb3      | INSIDE                 | 0.094                                                        | 0.448                          | 5520.41            | 2472.56            | 0.042                          | 4114.22            | 172.77             |
| A_68_P21769580 | chr2:155937622-155937666                          | NM_170588:57       | Cpne1      | INSIDE                 | 0.643                                                        | 2.976                          | 6531.47            | 19437.39           | 1.913                          | 4455.40            | 8525.27            |
| A_68_P21769581 | chr2:155937720-155937764                          | NM_170588:-41      | Cpne1      | PROMOTER               | 0.277                                                        | 0.677                          | 1302.27            | 881.81             | 0.188                          | 1006.55            | 189.01             |
| A_68_P31126792 | chr17:29375212-29375256                           | NM_153166:-499     | Cpne5      | PROMOTER               | 0.42                                                         | 0.290                          | 3346.26            | 971.62             | 0.122                          | 2414.06            | 294.18             |
| A_68_P31126789 | chr17:29374780-29374824                           | NM_153166:-67      | Cpne5      | PROMOTER               | 0.526                                                        | 4.550                          | 5748.60            | 26157.54           | 2.392                          | 4356.20            | 10420.07           |
| A_68_P31126791 | chr17:29375001-29375045                           | NM_153166:-287     | Cpne5      | PROMOTER               | 0.576                                                        | 6.169                          | 700.91             | 4324.08            | 3.555                          | 612.18             | 2176.39            |
| A_68_P31126793 | chr17:29375333-29375377                           | NM_153166:-619     | Cpne5      | PROMOTER               | 0.598                                                        | 0.299                          | 4973.11            | 1487.58            | 0.179                          | 3591.59            | 642.21             |
| A_68_P30431386 | chr15:90509992-90510036                           | NM_025815:-195     | Cpne8      | PROMOTER               | 0.659                                                        | 2.418                          | 1846.49            | 4465.24            | 1.595                          | 1338.29            | 2134.04            |
| A_68_P24758532 | chr6:113232291-113232335                          | NM_170673:12       | Cpne9      | INSIDE                 | 0.607                                                        | 3.004                          | 1142.07            | 3430.65            | 1.823                          | 1013.85            | 1848.15            |
| A_68_P28688785 | chr12:103214150-103214194                         | NM_016856:-11      | Cpsf2      | PROMOTER               | 0.559                                                        | 4.124                          | 1560.44            | 6434.89            | 2.306                          | 1425.20            | 3287.19            |
| A_68_P28688783 | chr12:103213937-103213981                         | NM_016856:-225     | Cpsf2      | PROMOTER               | 0.568                                                        | 6.788                          | 1525.46            | 10354.74           | 3.855                          | 1405.69            | 5419.09            |
| A_68_P24164624 | chr5:145928360-145928404                          | NM_178576:290      | Cpsf4      | INSIDE                 | 0.291                                                        | 1.532                          | 1562.73            | 2393.37            | 0.446                          | 1313.33            | 586.14             |
| A_68_P27480860 | chr10:116813708-116813752                         | NM_001013391:299   | Cpsf6      | INSIDE                 | 0.651                                                        | 2.814                          | 946.02             | 2662.14            | 1.831                          | 888.50             | 1626.58            |
| A_68_P31951138 | chr19:10599754-10599798                           | NM_001164272:43    | Cpsf7      | INSIDE                 | 0.28                                                         | 0.575                          | 1973.90            | 1135.06            | 0.161                          | 1581.81            | 254.33             |
| A_68_P23601183 | chr5:35868307-35868351                            | NM_153107:-53      | Cpz        | PROMOTER               | 0.628                                                        | 0.505                          | 2501.29            | 1262.37            | 0.317                          | 1756.65            | 556.81             |
| A_68_P26527664 | chr9:54613648-54613692                            | NM_013496:1056     | Crabp1     | INSIDE                 | 0.42                                                         | 5.579                          | 776.40             | 4331.19            | 2.342                          | 732.00             | 1714.52            |
| A_68_P26527662 | chr9:54613478-54613522                            | NM_013496:886      | Crabp1     | INSIDE                 | 0.594                                                        | 0.505                          | 5487.38            | 2772.90            | 0.3                            | 3728.90            | 1119.74            |
| A_68_P27364532 | chr10:94786282-94786326                           | NM_009950:427      | Cradd      | INSIDE                 | 0.221                                                        | 0.476                          | 2013.33            | 959.31             | 0.105                          | 1675.08            | 176.45             |
| A_68_P27364531 | chr10:94786138-94786182                           | NM_009950:571      | Cradd      | INSIDE                 | 0.349                                                        | 0.293                          | 2323.03            | 681.57             | 0.102                          | 1688.33            | 172.84             |
| A_68_P31101001 | chr17:25151361-25151405                           | NM_020608:793      | Cramp11    | INSIDE                 | 0.434                                                        | 5.458                          | 4390.50            | 23962.30           | 2.371                          | 3269.66            | 7753.24            |
| A_68_P31101000 | chr17:25151186-25151230                           | NM_020608:967      | Cramp11    | INSIDE                 | 0.651                                                        | 0.256                          | 9098.37            | 2327.64            | 0.166                          | 6449.60            | 1073.49            |
| A_68_P21103096 | chr2:30271133-30271177                            | NM_007760:114      | Crat       | INSIDE                 | 0.388                                                        | 20.369                         | 2961.22            | 60316.55           | 7.897                          | 2550.62            | 20143.51           |
| A_68_P21103095 | chr2:30271038-30271082                            | NM_007760:208      | Crat       | INSIDE                 | 0.572                                                        | 5.031                          | 1408.37            | 7084.99            | 2.879                          | 1240.51            | 3570.93            |
| A_68_P21144181 | chr2:37649266-37649310                            | NM_001163566:17520 | Crb2       | INSIDE                 | 0.244                                                        | 10.746                         | 2235.78            | 24026.48           | 2.627                          | 1655.20            | 4348.96            |
| A_68_P31259847 | chr17:57201924-57201968                           | NM_177638:247      | Crb3       | INSIDE                 | 0.599                                                        | 0.587                          | 2571.10            | 1509.47            | 0.352                          | 1948.55            | 685.54             |
| A_68_P24091776 | chr5:130505164-130505208                          | NM_007761:11       | Crcp       | INSIDE                 | 0.635                                                        | 6.307                          | 725.09             | 4573.17            | 4.003                          | 637.70             | 2552.73            |
| A_68_P20293016 | chr1:64579676-64579720                            | NM_001037726:321   | Creb1      | INSIDE                 | 0.082                                                        | 3.676                          | 3716.44            | 13662.65           | 0.302                          | 3063.65            | 926.71             |
| A_68_P20293011 | chr1:64579120-64579164                            | NM_001037726:-235  | Creb1      | PROMOTER               | 0.363                                                        | 0.366                          | 3336.36            | 1221.74            | 0.133                          | 2378.77            | 316.54             |
| A_68_P21425775 | chr2:91815556-91815600                            | NM_011957:48749    | Creb311    | DOWNSTREAM             | 0.251                                                        | 9.822                          | 1099.23            | 10796.49           | 2.468                          | 870.12             | 2147.67            |
| A_68_P30508953 | chr16:4212906-4212950                             | NM_001025432:476   | Crebbp     | INSIDE                 | 0.514                                                        | 0.208                          | 2247.93            | 468.59             | 0.107                          | 1618.25            | 173.31             |
| A_68_P30508958 | chr16:4214152-4214196                             | NM_001025432:-770  | Crebbp     | PROMOTER               | 0.526                                                        | 5.160                          | 1147.44            | 5921.05            | 2.714                          | 1096.65            | 2976.07            |
| A_68_P25313627 | chr7:97591983-97592027                            | NM_145151:714      | Crebzf     | INSIDE                 | 0.663                                                        | 3.686                          | 1311.41            | 4833.26            | 2.445                          | 1076.60            | 2632.20            |

| ProbeName      | Target position of probe on CpG island microarray | TargetID          | GeneSymbol | CpG island Description | Ratio of relative methylation (TiO <sub>2</sub> -NP/Vehicle) | Sham group                     |                    |                    | TiO <sub>2</sub> -H group      |                    |                    |
|----------------|---------------------------------------------------|-------------------|------------|------------------------|--------------------------------------------------------------|--------------------------------|--------------------|--------------------|--------------------------------|--------------------|--------------------|
|                |                                                   |                   |            |                        |                                                              | Relative methylation (Cy5/Cy3) | Cy3 signal (Input) | Cy5 signal (MeDIP) | Relative methylation (Cy5/Cy3) | Cy3 signal (Input) | Cy5 signal (MeDIP) |
| A_68_P20796287 | chr1:167694031-167694075                          | NM_011804:142     | Creg1      | INSIDE                 | 0.504                                                        | 4.855                          | 2262.50            | 10985.43           | 2.445                          | 2016.08            | 4929.49            |
| A_68_P21976418 | chr3:19594468-19594512                            | NM_205769:906     | Crh        | INSIDE                 | 0.375                                                        | 0.332                          | 1763.41            | 585.39             | 0.125                          | 1518.09            | 189.03             |
| A_68_P28089255 | chr11:103995098-103995142                         | NM_007762:925     | Crhr1      | INSIDE                 | 0.657                                                        | 2.809                          | 1973.33            | 5543.00            | 1.844                          | 1706.91            | 3148.03            |
| A_68_P31369865 | chr17:78599190-78599234                           | NM_015800:-375    | Crim1      | PROMOTER               | 0.42                                                         | 8.686                          | 2349.97            | 20411.08           | 3.645                          | 1975.26            | 7200.66            |
| A_68_P30573853 | chr16:17452437-17452481                           | NM_007764:379     | Crkl       | INSIDE                 | 0.61                                                         | 0.686                          | 1119.53            | 767.67             | 0.418                          | 890.36             | 372.60             |
| A_68_P25952284 | chr8:73027155-73027199                            | NM_018827:10122   | Crllf1     | INSIDE                 | 0.381                                                        | 8.144                          | 2579.76            | 21008.80           | 3.101                          | 2280.48            | 7072.24            |
| A_68_P23976362 | chr5:109987925-109987969                          | NM_001164735:66   | Crif2      | INSIDE                 | 0.51                                                         | 0.324                          | 1466.27            | 474.48             | 0.165                          | 1056.90            | 174.55             |
| A_68_P27952488 | chr11:79894575-79894619                           | NM_018776:-139    | Crif3      | DIVERGENT_PROMOTER     | 0.399                                                        | 0.329                          | 1715.72            | 563.73             | 0.131                          | 1305.72            | 171.04             |
| A_68_P23612513 | chr5:37637158-37637202                            | NM_007765:150     | Crmp1      | INSIDE                 | 0.387                                                        | 0.427                          | 1650.56            | 705.41             | 0.166                          | 1285.29            | 212.74             |
| A_68_P23612479 | chr5:37633037-37633081                            | NM_001136058:-260 | Crmp1      | PROMOTER               | 0.469                                                        | 7.800                          | 1639.66            | 12789.87           | 3.661                          | 1445.56            | 5292.07            |
| A_68_P23612514 | chr5:37637296-37637340                            | NM_007765:288     | Crmp1      | INSIDE                 | 0.327                                                        | 0.668                          | 1061.84            | 709.56             | 0.218                          | 784.59             | 171.35             |
| A_68_P23361673 | chr4:140581289-140581333                          | NM_172122:28266   | Crocc      | INSIDE                 | 0.334                                                        | 15.554                         | 2707.21            | 42106.99           | 5.191                          | 2450.71            | 12720.41           |
| A_68_P23361674 | chr4:140581469-140581513                          | NM_172122:28086   | Crocc      | INSIDE                 | 0.593                                                        | 6.333                          | 1495.33            | 9470.52            | 3.757                          | 1320.63            | 4961.15            |
| A_68_P23361905 | chr4:140616349-140616393                          | NM_172122:-6794   | Crocc      | PROMOTER               | 0.557                                                        | 2.937                          | 4255.71            | 12500.26           | 1.635                          | 3315.77            | 5422.82            |
| A_68_P32121139 | chr19:42505784-42505828                           | NM_145123:467     | Crtac1     | INSIDE                 | 0.479                                                        | 0.492                          | 4151.81            | 2044.71            | 0.236                          | 2696.15            | 636.18             |
| A_68_P26844408 | chr9:114299168-114299212                          | NM_019922:640     | Crtap      | INSIDE                 | 0.251                                                        | 2.634                          | 5957.51            | 15694.17           | 0.66                           | 4804.90            | 3172.55            |
| A_68_P25268092 | chr7:87833284-87833328                            | NM_173863:457     | Crtc3      | INSIDE                 | 0.578                                                        | 4.072                          | 1553.64            | 6326.97            | 2.353                          | 1329.15            | 3127.90            |
| A_68_P30964660 | chr16:91728640-91728684                           | NM_026994:385     | Cryz1      | INSIDE                 | 0.647                                                        | 0.289                          | 2540.49            | 735.24             | 0.187                          | 2001.12            | 374.79             |
| A_68_P27540829 | chr10:127775164-127775208                         | NM_026444:299     | Cs         | INSIDE                 | 0.528                                                        | 0.663                          | 929.56             | 616.68             | 0.35                           | 767.80             | 268.93             |
| A_68_P24850798 | chr6:131338248-131338292                          | NM_011733:198     | Csda       | INSIDE                 | 0.401                                                        | 12.609                         | 2181.97            | 27511.77           | 5.055                          | 1956.17            | 9887.53            |
| A_68_P24850799 | chr6:131338430-131338474                          | NM_011733:16      | Csda       | INSIDE                 | 0.389                                                        | 4.204                          | 2450.78            | 10303.38           | 1.634                          | 2169.83            | 3544.76            |
| A_68_P22408449 | chr3:107563183-107563227                          | NM_001113529:183  | Csfl       | INSIDE                 | 0.266                                                        | 50.451                         | 5941.35            | 299747.40          | 13.444                         | 7769.89            | 104456.50          |
| A_68_P32229409 | chr19:61301021-61301065                           | NM_009970:3279    | Csf2ra     | INSIDE                 | 0.131                                                        | 2.056                          | 2026.82            | 4166.78            | 0.269                          | 1451.42            | 390.46             |
| A_68_P31758329 | chr18:61715242-61715286                           | NM_146087:29      | Csnk1a1    | INSIDE                 | 0.568                                                        | 4.287                          | 2062.95            | 8843.62            | 2.434                          | 1748.66            | 4256.80            |
| A_68_P31758330 | chr18:61715307-61715351                           | NM_146087:93      | Csnk1a1    | INSIDE                 | 0.663                                                        | 0.528                          | 918.07             | 484.56             | 0.35                           | 769.28             | 269.14             |
| A_68_P26590184 | chr9:65757067-65757111                            | NM_173185:272     | Csnk1g1    | INSIDE                 | 0.543                                                        | 15.108                         | 2759.64            | 41692.76           | 8.197                          | 2456.25            | 20134.65           |
| A_68_P27284502 | chr10:80101268-80101313                           | NM_001159591:8890 | Csnk1g2    | INSIDE                 | 0.447                                                        | 3.548                          | 1050.23            | 3726.66            | 1.586                          | 728.58             | 1155.79            |
| A_68_P31715738 | chr18:54022583-54022627                           | NM_152809:838     | Csnk1g3    | INSIDE                 | 0.148                                                        | 0.472                          | 8836.35            | 4173.68            | 0.07                           | 5714.25            | 399.61             |
| A_68_P31715736 | chr18:54022224-54022268                           | NM_152809:480     | Csnk1g3    | INSIDE                 | 0.326                                                        | 14.292                         | 568.64             | 8127.05            | 4.665                          | 580.68             | 2709.03            |
| A_68_P31715735 | chr18:54022118-54022162                           | NM_152809:374     | Csnk1g3    | INSIDE                 | 0.381                                                        | 5.539                          | 1286.14            | 7124.37            | 2.109                          | 1076.58            | 2270.90            |
| A_68_P21748226 | chr2:152053141-152053185                          | NM_007788:587     | Csnk2a1    | INSIDE                 | 0.485                                                        | 7.476                          | 2956.63            | 22103.77           | 3.625                          | 2567.05            | 9306.19            |
| A_68_P21748223 | chr2:152052880-152052924                          | NM_007788:327     | Csnk2a1    | INSIDE                 | 0.32                                                         | 1.399                          | 2018.26            | 2822.73            | 0.448                          | 1436.40            | 642.98             |
| A_68_P31157712 | chr17:35257797-35257841                           | NM_009975:574     | Csnk2b     | INSIDE                 | 0.37                                                         | 0.525                          | 1164.49            | 611.44             | 0.194                          | 879.76             | 170.73             |
| A_68_P31157711 | chr17:35257720-35257764                           | NM_009975:650     | Csnk2b     | INSIDE                 | 0.336                                                        | 4.572                          | 2731.85            | 12490.93           | 1.537                          | 2243.36            | 3449.04            |
| A_68_P26538932 | chr9:56712960-56713004                            | NM_139001:72      | Cspg4      | INSIDE                 | 0.166                                                        | 23.073                         | 8045.17            | 185628.10          | 3.819                          | 8694.88            | 33207.04           |
| A_68_P20025490 | chr1:10029865-10029909                            | NM_026493:1588    | Cspp1      | INSIDE                 | 0.618                                                        | 0.650                          | 1250.34            | 812.95             | 0.402                          | 939.06             | 377.06             |
| A_68_P26875484 | chr9:119892493-119892537                          | NM_153287:1262    | Csrmp1     | INSIDE                 | 0.451                                                        | 3.899                          | 820.81             | 3199.98            | 1.756                          | 686.44             | 1205.72            |
| A_68_P30486141 | chr15:100325298-100325342                         | NM_153407:350     | Csrmp2     | INSIDE                 | 0.543                                                        | 0.321                          | 4029.26            | 1294.95            | 0.174                          | 3315.81            | 578.58             |
| A_68_P30486146 | chr15:100325931-100325975                         | NM_153407:-282    | Csrmp2     | PROMOTER               | 0.54                                                         | 0.630                          | 1500.47            | 945.00             | 0.34                           | 1135.49            | 386.49             |
| A_68_P20641219 | chr1:137625693-137625737                          | NM_007791:-59     | Csrp1      | PROMOTER               | 0.572                                                        | 0.261                          | 1878.18            | 489.74             | 0.149                          | 1405.23            | 209.61             |
| A_68_P27446111 | chr10:110357053-110357097                         | NM_007792:-157    | Csrp2      | PROMOTER               | 0.434                                                        | 0.365                          | 1380.13            | 504.41             | 0.159                          | 1106.64            | 175.40             |
| A_68_P27446114 | chr10:110357360-110357404                         | NM_007792:151     | Csrp2      | INSIDE                 | 0.535                                                        | 0.573                          | 2855.83            | 1637.81            | 0.307                          | 2204.80            | 677.10             |
| A_68_P21706949 | chr2:144219429-144219473                          | NM_181417:24680   | Csrp2bp    | INSIDE                 | 0.408                                                        | 4.915                          | 2156.25            | 10597.07           | 2.004                          | 1586.99            | 3181.10            |
| A_68_P31928180 | chr19:5349389-5349433                             | NM_028623:164     | Cst6       | INSIDE                 | 0.105                                                        | 49.406                         | 9546.52            | 471656.80          | 5.174                          | 9347.57            | 48365.33           |
| A_68_P27274155 | chr10:77888554-77888598                           | NM_007793:162     | Cstb       | INSIDE                 | 0.641                                                        | 4.113                          | 1473.82            | 6062.23            | 2.635                          | 1212.51            | 3195.37            |
| A_68_P21863932 | chr2:172196696-172196740                          | NM_024199:216     | Cstfl      | INSIDE                 | 0.426                                                        | 0.331                          | 1642.00            | 543.65             | 0.141                          | 1277.87            | 180.08             |

| ProbeName      | Target position of probe on CpG island microarray | TargetID           | GeneSymbol | CpG island Description | Ratio of relative methylation (TiO <sub>2</sub> -NP/Vehicle) | Sham group                     |                    |                    | TiO <sub>2</sub> -H group      |                    |                    |
|----------------|---------------------------------------------------|--------------------|------------|------------------------|--------------------------------------------------------------|--------------------------------|--------------------|--------------------|--------------------------------|--------------------|--------------------|
|                |                                                   |                    |            |                        |                                                              | Relative methylation (Cy5/Cy3) | Cy3 signal (Input) | Cy5 signal (MeDIP) | Relative methylation (Cy5/Cy3) | Cy3 signal (Input) | Cy5 signal (MeDIP) |
| A_68_P32670206 | chrX:130593674-130593718                          | NM_133196:-191     | Cstf2      | PROMOTER               | 0.549                                                        | 3.467                          | 815.06             | 2825.71            | 1.903                          | 982.05             | 1868.42            |
| A_68_P21489863 | chr2:104430810-104430854                          | NM_001037326:192   | Cstf3      | INSIDE                 | 0.548                                                        | 0.658                          | 2573.60            | 1693.06            | 0.361                          | 1786.07            | 644.20             |
| A_68_P25539010 | chr7:140314266-140314310                          | NM_009980:878      | Ctbp2      | INSIDE                 | 0.459                                                        | 0.296                          | 2119.35            | 626.38             | 0.136                          | 1697.03            | 230.43             |
| A_68_P26135037 | chr8:108161197-108161241                          | NM_181322:781      | Ctcf       | INSIDE                 | 0.464                                                        | 0.584                          | 868.86             | 507.56             | 0.271                          | 652.33             | 176.94             |
| A_68_P31864637 | chr18:80666392-80666436                           | NM_026295:-8       | Ctdp1      | PROMOTER               | 0.4                                                          | 8.549                          | 2254.49            | 19274.68           | 3.423                          | 1907.27            | 6528.03            |
| A_68_P31864634 | chr18:80666119-80666163                           | NM_026295:266      | Ctdp1      | INSIDE                 | 0.44                                                         | 9.941                          | 936.34             | 9307.85            | 4.373                          | 764.74             | 3343.90            |
| A_68_P21583621 | chr2:121782180-121782224                          | NM_212450:14       | Ctdspl2    | INSIDE                 | 0.347                                                        | 1.660                          | 1625.03            | 2698.25            | 0.575                          | 1271.50            | 731.65             |
| A_68_P31838826 | chr18:75856914-75856965                           | NM_201354:411      | Ctif       | INSIDE                 | 0.381                                                        | 0.191                          | 3540.15            | 677.21             | 0.073                          | 2379.53            | 173.62             |
| A_68_P31838828 | chr18:75857092-75857136                           | NM_201354:236      | Ctif       | INSIDE                 | 0.385                                                        | 29.051                         | 3827.31            | 111186.00          | 11.197                         | 3644.20            | 40803.31           |
| A_68_P31838822 | chr18:75856443-75856487                           | NM_201354:886      | Ctif       | INSIDE                 | 0.641                                                        | 0.313                          | 1781.11            | 557.22             | 0.2                            | 1411.67            | 283.00             |
| A_68_P31616442 | chr18:35278972-35279016                           | NM_009818:429      | Ctnna1     | INSIDE                 | 0.559                                                        | 0.219                          | 2385.55            | 523.60             | 0.123                          | 1678.86            | 205.90             |
| A_68_P24568080 | chr6:77929479-77929523                            | NM_001109764:161   | Ctnna2     | INSIDE                 | 0.339                                                        | 18.068                         | 2123.19            | 38362.59           | 6.127                          | 2401.98            | 14716.01           |
| A_68_P24568082 | chr6:77929708-77929753                            | NM_001109764:-69   | Ctnna2     | PROMOTER               | 0.491                                                        | 4.005                          | 814.50             | 3262.30            | 1.968                          | 738.56             | 1453.46            |
| A_68_P27190984 | chr10:62892485-62892529                           | NM_177612:-339     | Ctnna3     | PROMOTER               | 0.376                                                        | 0.265                          | 2164.89            | 573.80             | 0.1                            | 1739.77            | 173.37             |
| A_68_P22941966 | chr4:56878242-56878286                            | NM_018761:-181     | Ctnnal1    | PROMOTER               | 0.45                                                         | 0.161                          | 3468.15            | 559.76             | 0.073                          | 2400.73            | 174.35             |
| A_68_P22941962 | chr4:56877715-56877759                            | NM_018761:347      | Ctnnal1    | INSIDE                 | 0.547                                                        | 9.294                          | 924.09             | 8588.20            | 5.081                          | 753.53             | 3828.43            |
| A_68_P26880505 | chr9:120843141-120843185                          | NM_001165902:467   | Ctnnb1     | INSIDE                 | 0.281                                                        | 0.201                          | 4393.19            | 883.31             | 0.056                          | 3231.79            | 182.45             |
| A_68_P26880500 | chr9:120842272-120842316                          | NM_007614:-223     | Ctnnb1     | PROMOTER               | 0.598                                                        | 3.519                          | 2695.00            | 9482.95            | 2.105                          | 2084.96            | 4389.00            |
| A_68_P26880506 | chr9:120843223-120843267                          | NM_001165902:549   | Ctnnb1     | INSIDE                 | 0.32                                                         | 0.661                          | 1691.69            | 1118.35            | 0.211                          | 1353.62            | 286.23             |
| A_68_P26880510 | chr9:120843613-120843657                          | NM_001165902:939   | Ctnnb1     | INSIDE                 | 0.442                                                        | 3.723                          | 1304.58            | 4857.16            | 1.647                          | 1064.60            | 1753.08            |
| A_68_P23400905 | chr4:148892711-148892755                          | NM_023465:383      | Ctnnbip1   | INSIDE                 | 0.513                                                        | 0.223                          | 2204.99            | 491.56             | 0.114                          | 1765.40            | 201.91             |
| A_68_P21778674 | chr2:157563392-157563436                          | NM_025680:278      | Ctnnb1     | INSIDE                 | 0.115                                                        | 1.370                          | 1484.06            | 2033.63            | 0.157                          | 1089.68            | 171.50             |
| A_68_P30109622 | chr15:30576916-30576960                           | NM_008729:474591   | Ctnnd2     | INSIDE                 | 0.343                                                        | 0.665                          | 7274.99            | 4838.91            | 0.228                          | 5336.05            | 1217.09            |
| A_68_P30109621 | chr15:30576825-30576869                           | NM_008729:474499   | Ctnnd2     | INSIDE                 | 0.498                                                        | 1.412                          | 3205.43            | 4527.23            | 0.703                          | 2395.59            | 1683.65            |
| A_68_P23252015 | chr4:120242852-120242896                          | NM_016748:7        | Ctpts      | INSIDE                 | 0.506                                                        | 0.340                          | 1424.43            | 484.21             | 0.172                          | 1261.21            | 216.73             |
| A_68_P23252011 | chr4:120242395-120242439                          | NM_016748:465      | Ctpts      | INSIDE                 | 0.539                                                        | 0.519                          | 1328.18            | 689.34             | 0.28                           | 948.94             | 265.27             |
| A_68_P25416676 | chr7:118172200-118172244                          | NM_009431:-242     | Ctr9       | PROMOTER               | 0.314                                                        | 5.977                          | 2155.75            | 12885.95           | 1.878                          | 2030.94            | 3813.94            |
| A_68_P25416681 | chr7:118172726-118172770                          | NM_009431:284      | Ctr9       | INSIDE                 | 0.607                                                        | 0.722                          | 2768.56            | 2000.00            | 0.438                          | 2051.76            | 899.41             |
| A_68_P29659269 | chr14:63741273-63741317                           | NM_007798:-7       | Ctsb       | PROMOTER               | 0.351                                                        | 0.498                          | 4573.60            | 2275.53            | 0.175                          | 3441.04            | 600.79             |
| A_68_P29659271 | chr14:63741571-63741615                           | NM_007798:291      | Ctsb       | INSIDE                 | 0.447                                                        | 0.482                          | 907.80             | 437.39             | 0.215                          | 775.90             | 167.13             |
| A_68_P29098528 | chr13:64471285-64471329                           | NM_009984:308      | Ctsl       | INSIDE                 | 0.491                                                        | 0.664                          | 1385.91            | 919.73             | 0.326                          | 1294.72            | 422.25             |
| A_68_P22394779 | chr3:104855704-104855748                          | NM_001163332:145   | Ctnbnp2nl  | INSIDE                 | 0.635                                                        | 0.310                          | 1782.56            | 552.57             | 0.197                          | 1417.95            | 278.91             |
| A_68_P25616898 | chr8:4259319-4259363                              | NM_183315:-66      | Ctxn1      | PROMOTER               | 0.188                                                        | 19.462                         | 4310.53            | 83889.43           | 3.658                          | 3651.96            | 13358.12           |
| A_68_P27998413 | chr11:88007252-88007296                           | NM_001172099:24208 | Cuedc1     | INSIDE                 | 0.114                                                        | 2.423                          | 2882.88            | 6985.05            | 0.277                          | 2076.83            | 575.99             |
| A_68_P27997846 | chr11:87913149-87913193                           | NM_198013:523      | Cuedc1     | INSIDE                 | 0.371                                                        | 0.509                          | 1000.62            | 509.27             | 0.189                          | 904.21             | 170.82             |
| A_68_P27997843 | chr11:87912671-87912715                           | NM_198013:45       | Cuedc1     | INSIDE                 | 0.405                                                        | 9.525                          | 3333.44            | 31750.35           | 3.853                          | 2797.55            | 10780.06           |
| A_68_P27998412 | chr11:88007125-88007169                           | NM_001172099:24080 | Cuedc1     | INSIDE                 | 0.199                                                        | 1.846                          | 1272.13            | 2348.18            | 0.367                          | 906.05             | 332.19             |
| A_68_P24423143 | chr6:47403815-47403859                            | NM_012042:-486     | Cul1       | PROMOTER               | 0.402                                                        | 11.188                         | 1137.22            | 12723.62           | 4.497                          | 945.31             | 4251.02            |
| A_68_P31458282 | chr18:3383392-3383436                             | NM_029402:192      | Cul2       | INSIDE                 | 0.418                                                        | 6.798                          | 2281.72            | 15511.64           | 2.844                          | 1880.61            | 5348.06            |
| A_68_P31208134 | chr17:46790061-46790105                           | NM_025611:2796     | Cul7       | INSIDE                 | 0.317                                                        | 6.538                          | 3192.33            | 20871.53           | 2.072                          | 2148.82            | 4452.97            |
| A_68_P31208112 | chr17:46787505-46787549                           | NM_025611:240      | Cul7       | INSIDE                 | 0.414                                                        | 9.393                          | 1487.55            | 13971.99           | 3.884                          | 1263.76            | 4909.06            |
| A_68_P31208133 | chr17:46789942-46789986                           | NM_025611:2678     | Cul7       | INSIDE                 | 0.482                                                        | 2.824                          | 3715.78            | 10493.33           | 1.36                           | 2579.36            | 3508.38            |
| A_68_P31207500 | chr17:46683388-46683432                           | NM_001081335:-73   | Cul9       | PROMOTER               | 0.364                                                        | 0.390                          | 3471.13            | 1353.26            | 0.142                          | 2061.11            | 292.17             |
| A_68_P31207496 | chr17:46682947-46682991                           | NM_001081335:369   | Cul9       | INSIDE                 | 0.518                                                        | 0.237                          | 2703.44            | 641.15             | 0.123                          | 1865.70            | 229.18             |
| A_68_P32128434 | chr19:43827858-43827902                           | NM_001113562:368   | Cutc       | INSIDE                 | 0.324                                                        | 7.670                          | 2635.80            | 20215.51           | 2.486                          | 2250.70            | 5595.39            |
| A_68_P32128432 | chr19:43827652-43827696                           | NM_001113562:162   | Cutc       | INSIDE                 | 0.547                                                        | 0.266                          | 5834.22            | 1553.87            | 0.146                          | 4124.20            | 600.48             |

| ProbeName      | Target position of probe on CpG island microarray | TargetID          | GeneSymbol    | CpG island Description | Ratio of relative methylation (TiO <sub>2</sub> -NP/Vehicle) | Sham group                     |                    |                    | TiO <sub>2</sub> -H group      |                    |                    |
|----------------|---------------------------------------------------|-------------------|---------------|------------------------|--------------------------------------------------------------|--------------------------------|--------------------|--------------------|--------------------------------|--------------------|--------------------|
|                |                                                   |                   |               |                        |                                                              | Relative methylation (Cy5/Cy3) | Cy3 signal (Input) | Cy5 signal (MeDIP) | Relative methylation (Cy5/Cy3) | Cy3 signal (Input) | Cy5 signal (MeDIP) |
| A_68_P26317495 | chr9:14305304-14305348                            | NM_023153:264     | Cwc15         | INSIDE                 | 0.597                                                        | 2.435                          | 1609.59            | 3919.90            | 1.454                          | 1259.40            | 1831.62            |
| A_68_P23797494 | chr5:73797444-73797488                            | NM_181323:150     | Cwh43         | INSIDE                 | 0.453                                                        | 3.550                          | 2319.29            | 8233.48            | 1.607                          | 1893.84            | 3043.21            |
| A_68_P24780081 | chr6:117118598-117118642                          | NM_021704:68      | Cxcl12        | INSIDE                 | 0.579                                                        | 0.146                          | 3358.43            | 489.86             | 0.084                          | 2507.04            | 211.74             |
| A_68_P29060390 | chr13:56397734-56397778                           | NM_019568:156     | Cxcl14        | INSIDE                 | 0.411                                                        | 6.804                          | 3822.82            | 26010.69           | 2.798                          | 3018.25            | 8444.56            |
| A_68_P31620539 | chr18:36020271-36020315                           | NM_133687:30821   | Cxxc5         | INSIDE                 | 0.252                                                        | 17.460                         | 1481.47            | 25866.44           | 4.401                          | 1400.03            | 6161.88            |
| A_68_P31620307 | chr18:35990504-35990548                           | NM_133687:1055    | Cxxc5         | INSIDE                 | 0.652                                                        | 4.829                          | 1250.28            | 6037.72            | 3.149                          | 1022.64            | 3220.21            |
| A_68_P22411201 | chr3:108003559-108003603                          | NM_001081320:172  | Cyb561d1      | INSIDE                 | 0.351                                                        | 0.386                          | 1898.24            | 733.06             | 0.136                          | 1323.73            | 179.69             |
| A_68_P22411200 | chr3:108003435-108003479                          | NM_001081320:296  | Cyb561d1      | INSIDE                 | 0.541                                                        | 0.741                          | 2842.43            | 2107.49            | 0.401                          | 2080.31            | 833.74             |
| A_68_P26233345 | chr8:124956729-124956773                          | NM_007806:90      | Cyba          | INSIDE                 | 0.577                                                        | 0.587                          | 3880.94            | 2277.85            | 0.339                          | 2752.43            | 932.11             |
| A_68_P30349758 | chr15:76490310-76490354                           | NM_019396:159     | Cyhr1         | INSIDE                 | 0.335                                                        | 9.416                          | 4580.06            | 43127.39           | 3.151                          | 3456.10            | 10889.31           |
| A_68_P30349756 | chr15:76490140-76490184                           | NM_019396:329     | Cyhr1         | INSIDE                 | 0.363                                                        | 1.837                          | 11144.20           | 20472.54           | 0.668                          | 7634.34            | 5096.87            |
| A_68_P31378939 | chr17:80115332-80115376                           | NM_009994:-973    | Cyp1b1        | PROMOTER               | 0.597                                                        | 4.292                          | 502.02             | 2154.57            | 2.564                          | 475.75             | 1219.75            |
| A_68_P21853424 | chr2:170322747-170322791                          | NM_009996:-130    | Cyp24a1       | PROMOTER               | 0.5                                                          | 3.199                          | 4753.69            | 15208.84           | 1.598                          | 3215.45            | 5139.58            |
| A_68_P32097107 | chr19:37773571-37773615                           | NM_007811:1295    | Cyp26a1       | INSIDE                 | 0.61                                                         | 0.362                          | 1320.72            | 477.64             | 0.221                          | 994.28             | 219.31             |
| A_68_P28727385 | chr12:109572280-109572324                         | NM_010010:-288    | Cyp46a1       | PROMOTER               | 0.492                                                        | 4.631                          | 4210.48            | 19497.48           | 2.279                          | 3257.31            | 7422.64            |
| A_68_P31145617 | chr17:32589667-32589711                           | NM_177307:21      | Cyp4f39       | INSIDE                 | 0.12                                                         | 2.371                          | 1504.08            | 3566.06            | 0.285                          | 1127.42            | 321.30             |
| A_68_P31145618 | chr17:32589827-32589872                           | NM_177307:182     | Cyp4f39       | INSIDE                 | 0.193                                                        | 0.449                          | 2912.05            | 1306.87            | 0.087                          | 2088.99            | 181.11             |
| A_68_P31145776 | chr17:32629460-32629505                           | NM_177307:39815   | Cyp4f39       | INSIDE                 | 0.623                                                        | 2.462                          | 1107.20            | 2726.28            | 1.535                          | 870.36             | 1336.12            |
| A_68_P28291022 | chr12:25365866-25365910                           | NM_001004455:772  | Cys1          | INSIDE                 | 0.337                                                        | 13.271                         | 14254.71           | 189169.80          | 4.468                          | 10704.52           | 47827.01           |
| A_68_P28291023 | chr12:25365989-25366033                           | NM_001004455:650  | Cys1          | INSIDE                 | 0.452                                                        | 27.862                         | 5422.52            | 151081.60          | 12.597                         | 4119.47            | 51894.63           |
| A_68_P28291019 | chr12:25365387-25365431                           | NM_001004455:1252 | Cys1          | INSIDE                 | 0.601                                                        | 0.572                          | 6071.39            | 3474.86            | 0.344                          | 4342.00            | 1492.50            |
| A_68_P28291020 | chr12:25365549-25365593                           | NM_001004455:1090 | Cys1          | INSIDE                 | 0.385                                                        | 0.698                          | 1912.47            | 1334.76            | 0.269                          | 1599.88            | 429.81             |
| A_68_P24157329 | chr5:144383488-144383532                          | NM_011182:195     | Cyth3         | INSIDE                 | 0.451                                                        | 13.191                         | 2328.35            | 30713.57           | 5.948                          | 2158.73            | 12841.01           |
| A_68_P24157332 | chr5:144383775-144383819                          | NM_011182:481     | Cyth3         | INSIDE                 | 0.63                                                         | 0.507                          | 2427.97            | 1231.82            | 0.32                           | 2013.63            | 643.50             |
| A_68_P24157328 | chr5:144383397-144383441                          | NM_011182:103     | Cyth3         | INSIDE                 | 0.633                                                        | 2.907                          | 848.95             | 2467.84            | 1.841                          | 712.48             | 1311.55            |
| A_68_P27272484 | chr10:77632233-77632277                           | NM_138601:259     | D10Jhu81e     | INSIDE                 | 0.639                                                        | 0.435                          | 1509.80            | 656.28             | 0.278                          | 1271.90            | 353.39             |
| A_68_P28143433 | chr11:113546017-113546061                         | NM_177777:313     | D11Wsu47e     | INSIDE                 | 0.35                                                         | 0.432                          | 1942.39            | 839.98             | 0.152                          | 1450.70            | 219.88             |
| A_68_P28143432 | chr11:113545919-113545963                         | NM_177777:215     | D11Wsu47e     | INSIDE                 | 0.603                                                        | 2.662                          | 3133.96            | 8343.07            | 1.606                          | 2360.29            | 3790.01            |
| A_68_P28143424 | chr11:113544952-113544996                         | NM_138598:491     | D11Wsu99e     | INSIDE                 | 0.57                                                         | 0.214                          | 2879.24            | 615.66             | 0.122                          | 2251.73            | 274.48             |
| A_68_P28889295 | chr13:24936978-24937022                           | NM_001081051:1    | D130043K22Rik | INSIDE                 | 0.484                                                        | 0.679                          | 1023.62            | 695.20             | 0.329                          | 867.26             | 284.95             |
| A_68_P29487113 | chr14:28242620-28242665                           | NM_001114879:610  | D14Abbl1e     | INSIDE                 | 0.499                                                        | 4.238                          | 868.16             | 3679.47            | 2.113                          | 754.70             | 1594.80            |
| A_68_P31794495 | chr18:68092683-68092727                           | NM_172631:-206    | D18Ert653e    | PROMOTER               | 0.607                                                        | 7.279                          | 1055.77            | 7684.66            | 4.418                          | 816.45             | 3606.82            |
| A_68_P32040826 | chr19:27504142-27504186                           | NM_177474:146     | D19Bwg1357e   | INSIDE                 | 0.526                                                        | 0.497                          | 4637.45            | 2303.19            | 0.261                          | 3351.48            | 876.29             |
| A_68_P32040827 | chr19:27504259-27504303                           | NM_177474:30      | D19Bwg1357e   | INSIDE                 | 0.542                                                        | 0.389                          | 9667.95            | 3759.92            | 0.211                          | 6413.12            | 1352.58            |
| A_68_P32121691 | chr19:42593347-42593391                           | NM_177464:74      | D19Ert4386e   | INSIDE                 | 0.413                                                        | 0.290                          | 2184.32            | 632.98             | 0.12                           | 1389.43            | 166.36             |
| A_68_P32121690 | chr19:42593224-42593268                           | NM_177464:-48     | D19Ert4386e   | PROMOTER               | 0.512                                                        | 3.051                          | 1442.79            | 4401.50            | 1.563                          | 1135.42            | 1774.19            |
| A_68_P20166302 | chr1:39593044-39593088                            | NM_028043:420     | D1Bwg0212e    | INSIDE                 | 0.453                                                        | 5.492                          | 835.53             | 4588.94            | 2.489                          | 795.46             | 1979.74            |
| A_68_P20166303 | chr1:39593180-39593224                            | NM_028043:56      | D1Bwg0212e    | INSIDE                 | 0.662                                                        | 3.322                          | 693.48             | 2304.07            | 2.2                            | 635.04             | 1397.08            |
| A_68_P20166299 | chr1:39592701-39592745                            | NM_028043:76      | D1Bwg0212e    | INSIDE                 | 0.593                                                        | 0.611                          | 756.55             | 462.18             | 0.362                          | 664.89             | 240.71             |
| A_68_P20472155 | chr1:99558144-99558188                            | NM_133825:429     | D1Ert622e     | INSIDE                 | 0.329                                                        | 7.701                          | 2441.43            | 18801.09           | 2.537                          | 2150.06            | 5454.26            |
| A_68_P20472150 | chr1:99557453-99557497                            | NM_133825:1121    | D1Ert622e     | INSIDE                 | 0.398                                                        | 6.349                          | 2041.21            | 12960.51           | 2.527                          | 1696.26            | 4286.05            |
| A_68_P20910364 | chr1:188791866-188791912                          | NM_033077:594     | D1Pas1        | INSIDE                 | 0.656                                                        | 9.330                          | 1303.29            | 12159.80           | 6.124                          | 1252.64            | 7671.44            |
| A_68_P21566329 | chr2:118640037-118640081                          | NM_026412:320     | D2Ert750e     | INSIDE                 | 0.077                                                        | 2.300                          | 16381.02           | 37678.23           | 0.178                          | 11054.12           | 1965.48            |
| A_68_P22454038 | chr3:117062948-117062993                          | NM_177664:824     | D3Bwg0562e    | INSIDE                 | 0.632                                                        | 4.016                          | 958.52             | 3849.34            | 2.537                          | 802.13             | 2035.17            |
| A_68_P28767699 | chr12:117643707-117643751                         | NR_028421:-94     | D430020J02Rik | DIVERGENT_PROMOTER     | 0.617                                                        | 0.429                          | 2037.08            | 874.35             | 0.265                          | 1444.33            | 382.36             |
| A_68_P25496230 | chr7:132851736-132851780                          | NM_001081022:369  | D430042O09Rik | INSIDE                 | 0.539                                                        | 0.362                          | 2454.82            | 888.17             | 0.195                          | 1786.11            | 348.16             |

| ProbeName      | Target position of probe on CpG island microarray | TargetID           | GeneSymbol    | CpG island Description | Ratio of relative methylation (TiO <sub>2</sub> -NP/Vehicle) | Sham group                     |                    |                    | TiO <sub>2</sub> -H group      |                    |                    |
|----------------|---------------------------------------------------|--------------------|---------------|------------------------|--------------------------------------------------------------|--------------------------------|--------------------|--------------------|--------------------------------|--------------------|--------------------|
|                |                                                   |                    |               |                        |                                                              | Relative methylation (Cy5/Cy3) | Cy3 signal (Input) | Cy5 signal (MeDIP) | Relative methylation (Cy5/Cy3) | Cy3 signal (Input) | Cy5 signal (MeDIP) |
| A_68_P25496227 | chr7:132851431-132851475                          | NM_001081022:63    | D430042O09Rik | INSIDE                 | 0.624                                                        | 4.440                          | 489.46             | 2173.21            | 2.769                          | 466.29             | 1290.99            |
| A_68_P25496229 | chr7:132851609-132851653                          | NM_001081022:241   | D430042O09Rik | INSIDE                 | 0.153                                                        | 1.405                          | 1060.76            | 1489.95            | 0.215                          | 813.51             | 174.77             |
| A_68_P29134803 | chr13:72766020-72766064                           | NR_030701:-30      | D430050G20    | DIVERGENT_PROMOTER     | 0.617                                                        | 0.506                          | 3248.06            | 1644.28            | 0.312                          | 2563.93            | 800.55             |
| A_68_P23362370 | chr4:140695629-140695673                          | NM_001025608:61    | D4Erd22e      | INSIDE                 | 0.538                                                        | 0.459                          | 2363.59            | 1084.52            | 0.247                          | 1796.75            | 443.95             |
| A_68_P23362371 | chr4:140695718-140695762                          | NM_001025608:-29   | D4Erd22e      | DIVERGENT_PROMOTER     | 0.659                                                        | 3.059                          | 1078.44            | 3299.01            | 2.016                          | 949.33             | 1914.00            |
| A_68_P23241428 | chr4:118293645-118293692                          | NR_029469:-5340    | D4Erd617e     | PROMOTER               | 0.417                                                        | 0.511                          | 993.19             | 507.83             | 0.213                          | 798.63             | 170.18             |
| A_68_P23325561 | chr4:134479965-134480009                          | NM_023665:447      | D4Wsu53e      | INSIDE                 | 0.53                                                         | 6.088                          | 2326.27            | 14163.40           | 3.227                          | 1976.11            | 6377.12            |
| A_68_P23609090 | chr5:37086922-37086966                            | NM_001081232:264   | D5Erd579e     | INSIDE                 | 0.238                                                        | 23.644                         | 4520.27            | 106878.30          | 5.617                          | 4569.91            | 25668.50           |
| A_68_P23609089 | chr5:37086829-37086873                            | NM_001081232:358   | D5Erd579e     | INSIDE                 | 0.564                                                        | 3.300                          | 2083.76            | 6876.78            | 1.861                          | 1662.14            | 3092.48            |
| A_68_P23609093 | chr5:37087355-37087399                            | NM_001081232:-168  | D5Erd579e     | PROMOTER               | 0.623                                                        | 5.078                          | 3228.04            | 16392.35           | 3.162                          | 2377.72            | 7517.28            |
| A_68_P23609088 | chr5:37086702-37086746                            | NM_001081232:484   | D5Erd579e     | INSIDE                 | 0.353                                                        | 4.341                          | 1154.20            | 5010.80            | 1.532                          | 1062.38            | 1627.28            |
| A_68_P22942460 | chr4:56960340-56960384                            | NM_175518:-61      | D730040F13Rik | PROMOTER               | 0.323                                                        | 8.400                          | 1757.11            | 14758.92           | 2.714                          | 1590.68            | 4317.24            |
| A_68_P22942456 | chr4:56959870-56959914                            | NM_175518:409      | D730040F13Rik | INSIDE                 | 0.565                                                        | 11.302                         | 868.64             | 9817.03            | 6.385                          | 717.33             | 4580.31            |
| A_68_P23262658 | chr4:123089142-123089186                          | NM_001167918:-10   | D830031N03Rik | PROMOTER               | 0.266                                                        | 31.158                         | 1746.71            | 54423.81           | 8.297                          | 1576.78            | 13082.16           |
| A_68_P23262662 | chr4:123089650-123089695                          | NM_001167918:-518  | D830031N03Rik | PROMOTER               | 0.298                                                        | 11.766                         | 2861.54            | 33669.52           | 3.51                           | 2405.78            | 8444.63            |
| A_68_P23262657 | chr4:123089026-123089070                          | NM_001167918:106   | D830031N03Rik | INSIDE                 | 0.499                                                        | 0.528                          | 844.12             | 445.36             | 0.263                          | 663.76             | 174.78             |
| A_68_P25784087 | chr8:37210103-37210147                            | NM_172911:52243    | D8Erd82e      | INSIDE                 | 0.187                                                        | 15.940                         | 5919.52            | 94359.74           | 2.984                          | 4299.44            | 12831.17           |
| A_68_P25784086 | chr8:37209993-37210038                            | NM_172911:52134    | D8Erd82e      | INSIDE                 | 0.124                                                        | 13.200                         | 1587.80            | 20959.58           | 1.631                          | 999.05             | 1629.66            |
| A_68_P25784088 | chr8:37210172-37210216                            | NM_172911:52313    | D8Erd82e      | INSIDE                 | 0.641                                                        | 3.319                          | 420.63             | 1395.89            | 2.127                          | 339.78             | 722.82             |
| A_68_P25409557 | chr7:116847217-116847263                          | NM_020616:-10      | D930014E17Rik | PROMOTER               | 0.637                                                        | 0.574                          | 1221.63            | 700.80             | 0.366                          | 1016.56            | 371.65             |
| A_68_P22288618 | chr3:83843229-83843273                            | NM_172681:833      | D930015E06Rik | INSIDE                 | 0.347                                                        | 0.464                          | 1948.25            | 904.25             | 0.161                          | 1460.55            | 235.01             |
| A_68_P22288626 | chr3:83844024-83844068                            | NM_172681:37       | D930015E06Rik | INSIDE                 | 0.583                                                        | 5.213                          | 540.29             | 2816.34            | 3.037                          | 485.13             | 1473.14            |
| A_68_P22288630 | chr3:83844564-83844615                            | NM_172681:-506     | D930015E06Rik | PROMOTER               | 0.608                                                        | 0.510                          | 1361.75            | 694.44             | 0.31                           | 1029.51            | 319.13             |
| A_68_P27795131 | chr11:51464219-51464263                           | NR_027958:-215     | D930048N14Rik | PROMOTER               | 0.508                                                        | 0.477                          | 1163.28            | 554.68             | 0.242                          | 805.01             | 195.15             |
| A_68_P28528483 | chr12:72932910-72932958                           | NM_026102:870      | Daam1         | INSIDE                 | 0.471                                                        | 16.035                         | 681.28             | 10924.35           | 7.554                          | 471.49             | 3561.64            |
| A_68_P21134948 | chr2:35516613-35516657                            | NM_001114124:39134 | Dab2ip        | INSIDE                 | 0.216                                                        | 8.180                          | 2037.57            | 16666.78           | 1.77                           | 1618.00            | 2863.21            |
| A_68_P21134365 | chr2:35438082-35438126                            | NM_001114125:24127 | Dab2ip        | INSIDE                 | 0.462                                                        | 0.476                          | 939.12             | 446.95             | 0.22                           | 850.35             | 186.88             |
| A_68_P21134366 | chr2:35438211-35438255                            | NM_001114125:24255 | Dab2ip        | INSIDE                 | 0.549                                                        | 16.600                         | 1336.70            | 22188.83           | 9.117                          | 1111.06            | 10129.56           |
| A_68_P21134954 | chr2:35517488-35517532                            | NM_001114124:40010 | Dab2ip        | INSIDE                 | 0.403                                                        | 0.569                          | 955.61             | 543.28             | 0.229                          | 786.16             | 180.21             |
| A_68_P21134361 | chr2:35437675-35437719                            | NM_001114125:23719 | Dab2ip        | INSIDE                 | 0.575                                                        | 0.465                          | 954.38             | 443.79             | 0.267                          | 690.85             | 184.61             |
| A_68_P28525473 | chr12:72410602-72410646                           | NM_001190466:-246  | Dact1         | PROMOTER               | 0.291                                                        | 15.837                         | 4553.68            | 72114.96           | 4.602                          | 4120.54            | 18961.94           |
| A_68_P28525474 | chr12:72410830-72410874                           | NM_001190466:-18   | Dact1         | PROMOTER               | 0.542                                                        | 3.448                          | 6753.69            | 23287.90           | 1.87                           | 5030.80            | 9408.97            |
| A_68_P31058444 | chr17:14340634-14340678                           | NM_172826:182      | Dact2         | INSIDE                 | 0.518                                                        | 4.039                          | 1991.98            | 8044.72            | 2.092                          | 1713.22            | 3583.31            |
| A_68_P24983771 | chr7:17470567-17470612                            | NM_001081655:9924  | Dact3         | INSIDE                 | 0.639                                                        | 3.453                          | 835.06             | 2883.06            | 2.205                          | 701.54             | 1546.76            |
| A_68_P24156632 | chr5:144225585-144225629                          | NM_144915:246      | Daglb         | INSIDE                 | 0.416                                                        | 0.611                          | 1005.49            | 614.79             | 0.254                          | 726.11             | 184.74             |
| A_68_P26815510 | chr9:108472099-108472144                          | NM_026378:-101     | Dalrd3        | PROMOTER               | 0.597                                                        | 0.294                          | 2571.09            | 755.20             | 0.175                          | 2167.32            | 379.96             |
| A_68_P26022160 | chr8:87356049-87356093                            | NM_201227:-9348    | Dand5         | PROMOTER               | 0.482                                                        | 0.645                          | 1958.52            | 1263.48            | 0.311                          | 1443.93            | 448.92             |
| A_68_P30113003 | chr15:31154105-31154149                           | NM_146057:-13      | Dap           | PROMOTER               | 0.502                                                        | 5.187                          | 3792.24            | 19670.51           | 2.601                          | 3267.94            | 8501.27            |
| A_68_P22316449 | chr3:88754686-88754730                            | NM_001164533:-504  | Dap3          | PROMOTER               | 0.513                                                        | 0.527                          | 2815.02            | 1482.56            | 0.27                           | 2095.62            | 566.46             |
| A_68_P29086263 | chr13:60704015-60704059                           | NM_134062:465      | Dapk1         | INSIDE                 | 0.431                                                        | 0.385                          | 1532.58            | 590.67             | 0.166                          | 1042.19            | 173.27             |
| A_68_P26591484 | chr9:66005801-66005855                            | NM_010019:-204     | Dapk2         | PROMOTER               | 0.198                                                        | 0.334                          | 3967.89            | 1323.61            | 0.066                          | 2553.50            | 168.46             |
| A_68_P26591858 | chr9:66068690-66068734                            | NM_010019:62680    | Dapk2         | INSIDE                 | 0.523                                                        | 3.487                          | 4650.35            | 16217.89           | 1.825                          | 3486.01            | 6361.46            |
| A_68_P20600403 | chr1:130313627-130313671                          | NM_177445:345      | Dars          | INSIDE                 | 0.577                                                        | 0.270                          | 1809.49            | 488.79             | 0.156                          | 1491.99            | 232.36             |
| A_68_P20600401 | chr1:130313411-130313455                          | NM_177445:561      | Dars          | INSIDE                 | 0.589                                                        | 0.274                          | 3318.08            | 909.62             | 0.162                          | 2455.72            | 396.62             |
| A_68_P20600406 | chr1:130314008-130314052                          | NM_177445:-37      | Dars          | PROMOTER               | 0.554                                                        | 3.099                          | 1251.91            | 3880.16            | 1.717                          | 1083.37            | 1860.29            |
| A_68_P31150931 | chr17:34048707-34048751                           | NM_001199733:2183  | Daxx          | INSIDE                 | 0.231                                                        | 12.294                         | 647.12             | 7955.69            | 2.836                          | 508.64             | 1442.69            |



| ProbeName      | Target position of probe on CpG island microarray | TargetID           | GeneSymbol | CpG island Description | Ratio of relative methylation (TiO <sub>2</sub> -NP/Vehicle) | Sham group                     |                    |                    | TiO <sub>2</sub> -H group      |                    |                    |
|----------------|---------------------------------------------------|--------------------|------------|------------------------|--------------------------------------------------------------|--------------------------------|--------------------|--------------------|--------------------------------|--------------------|--------------------|
|                |                                                   |                    |            |                        |                                                              | Relative methylation (Cy5/Cy3) | Cy3 signal (Input) | Cy5 signal (MeDIP) | Relative methylation (Cy5/Cy3) | Cy3 signal (Input) | Cy5 signal (MeDIP) |
| A_68_P31150915 | chr17:34046487-34046531                           | NM_001199733:-37   | Daxx       | PROMOTER               | 0.383                                                        | 0.465                          | 3538.10            | 1646.34            | 0.178                          | 2378.10            | 423.75             |
| A_68_P30486712 | chr15:100446399-100446443                         | NM_011873:328      | Dazap2     | INSIDE                 | 0.653                                                        | 0.324                          | 2710.06            | 877.67             | 0.212                          | 1943.11            | 411.22             |
| A_68_P31227866 | chr17:50432495-50432539                           | NM_010021:408      | Dazl       | INSIDE                 | 0.456                                                        | 4.404                          | 888.80             | 3914.26            | 2.008                          | 715.02             | 1435.56            |
| A_68_P29055349 | chr13:55589582-55589626                           | NM_001177371:-167  | Dbn1       | PROMOTER               | 0.244                                                        | 30.542                         | 3496.49            | 106791.00          | 7.455                          | 3213.59            | 23956.83           |
| A_68_P29055348 | chr13:55589381-55589425                           | NM_001177371:35    | Dbn1       | INSIDE                 | 0.358                                                        | 7.134                          | 18369.07           | 131039.00          | 2.557                          | 15419.62           | 39432.89           |
| A_68_P29055347 | chr13:55589235-55589279                           | NM_001177371:181   | Dbn1       | INSIDE                 | 0.394                                                        | 5.961                          | 1065.06            | 6348.38            | 2.35                           | 953.01             | 2239.64            |
| A_68_P26240290 | chr8:126039221-126039265                          | NM_001170976:113   | Dbnnd1     | INSIDE                 | 0.605                                                        | 0.341                          | 2120.77            | 722.98             | 0.206                          | 1721.06            | 355.20             |
| A_68_P26240288 | chr8:126039003-126039047                          | NM_001170976:331   | Dbnnd1     | INSIDE                 | 0.615                                                        | 2.477                          | 2080.25            | 5152.24            | 1.522                          | 1626.01            | 2475.06            |
| A_68_P21818151 | chr2:164311938-164311982                          | NM_001048228:-416  | Dbnnd2     | PROMOTER               | 0.277                                                        | 2.435                          | 3784.77            | 9217.63            | 0.675                          | 2741.63            | 1851.91            |
| A_68_P27564951 | chr11:5688365-5688409                             | NM_001146308:-99   | Dbn1       | PROMOTER               | 0.455                                                        | 15.923                         | 2401.53            | 38238.50           | 7.244                          | 2110.05            | 15284.98           |
| A_68_P25113826 | chr7:56892177-56892221                            | NM_001005232:7     | Dbx1       | INSIDE                 | 0.457                                                        | 0.298                          | 2470.93            | 736.55             | 0.136                          | 1723.68            | 234.81             |
| A_68_P30459322 | chr15:95484732-95484776                           | NM_207533:448      | Dbx2       | INSIDE                 | 0.564                                                        | 3.075                          | 1095.13            | 3367.23            | 1.735                          | 908.05             | 1575.78            |
| A_68_P22882382 | chr4:45355016-45355060                            | NM_153167:66       | Dcaf10     | INSIDE                 | 0.248                                                        | 7.033                          | 1859.15            | 13075.52           | 1.743                          | 1448.89            | 2525.34            |
| A_68_P22861615 | chr4:41261631-41261675                            | NM_026893:282      | Dcaf12     | INSIDE                 | 0.433                                                        | 23.648                         | 4193.24            | 99163.75           | 10.24                          | 3770.80            | 38611.90           |
| A_68_P32351254 | chrX:42143356-42143400                            | NM_178739:-4       | Dcaf12l1   | PROMOTER               | 0.165                                                        | 13.903                         | 2915.72            | 40537.66           | 2.289                          | 3557.54            | 8143.55            |
| A_68_P32351252 | chrX:42143188-42143232                            | NM_001190718:128   | Dcaf12l1   | INSIDE                 | 0.318                                                        | 21.577                         | 2278.05            | 49153.15           | 6.868                          | 2874.17            | 19739.36           |
| A_68_P32351250 | chrX:42142934-42142979                            | NM_001190718:382   | Dcaf12l1   | INSIDE                 | 0.647                                                        | 2.623                          | 1042.05            | 2733.41            | 1.698                          | 1366.22            | 2320.25            |
| A_68_P21317258 | chr2:70894105-70894149                            | NM_001165982:326   | Dcaf17     | INSIDE                 | 0.229                                                        | 1.878                          | 685.65             | 1287.51            | 0.43                           | 660.09             | 283.74             |
| A_68_P20794600 | chr1:167390414-167390458                          | NM_028759:158      | Dcaf6      | INSIDE                 | 0.53                                                         | 3.043                          | 3012.19            | 9165.54            | 1.612                          | 2299.87            | 3706.25            |
| A_68_P20831241 | chr1:174078163-174078207                          | NM_153555:39       | Dcaf8      | INSIDE                 | 0.438                                                        | 0.431                          | 1147.09            | 494.95             | 0.189                          | 905.44             | 171.25             |
| A_68_P28082865 | chr11:102878532-102878576                         | NM_026551:-93      | Dcaid1     | PROMOTER               | 0.46                                                         | 9.560                          | 4783.64            | 45731.95           | 4.395                          | 4096.92            | 18007.55           |
| A_68_P30791337 | chr16:58408386-58408430                           | NM_028523:-239     | Deblid2    | PROMOTER               | 0.467                                                        | 6.272                          | 3568.85            | 22382.07           | 2.927                          | 2932.92            | 8585.37            |
| A_68_P28313702 | chr12:29236975-29237019                           | NM_001177964:-3794 | Dcdc2c     | PROMOTER               | 0.415                                                        | 7.770                          | 1633.09            | 12689.17           | 3.222                          | 1363.32            | 4393.03            |
| A_68_P28313705 | chr12:29237270-29237314                           | NM_001177964:-4090 | Dcdc2c     | PROMOTER               | 0.519                                                        | 4.698                          | 1190.65            | 5594.05            | 2.437                          | 967.34             | 2357.64            |
| A_68_P25394242 | chr7:112911135-112911179                          | NM_001162943:24908 | Dchs1      | INSIDE                 | 0.615                                                        | 2.795                          | 2894.30            | 8088.42            | 1.719                          | 2059.40            | 3539.33            |
| A_68_P25394241 | chr7:112911036-112911080                          | NM_001162943:25006 | Dchs1      | INSIDE                 | 0.206                                                        | 3.197                          | 3585.70            | 11462.16           | 0.658                          | 2418.98            | 1592.50            |
| A_68_P22152359 | chr3:55046645-55046689                            | NM_001111053:219   | Delk1      | INSIDE                 | 0.303                                                        | 8.749                          | 6859.61            | 60014.81           | 2.649                          | 6472.14            | 17142.87           |
| A_68_P22152358 | chr3:55046621-55046665                            | NM_001111053:95    | Delk1      | INSIDE                 | 0.644                                                        | 0.606                          | 1276.15            | 772.82             | 0.39                           | 1022.32            | 398.62             |
| A_68_P22305772 | chr3:86723682-86723726                            | NM_001195496:1102  | Delk2      | INSIDE                 | 0.4                                                          | 0.625                          | 927.68             | 579.68             | 0.25                           | 691.59             | 172.95             |
| A_68_P22388169 | chr3:103613288-103613332                          | NM_001025312:0     | Delre1b    | INSIDE                 | 0.517                                                        | 15.311                         | 1664.62            | 25487.03           | 7.91                           | 1394.24            | 11028.96           |
| A_68_P24791602 | chr6:119125266-119125312                          | NM_001033379:18    | Dep1b      | INSIDE                 | 0.525                                                        | 10.998                         | 3550.37            | 39048.49           | 5.773                          | 3190.00            | 18416.10           |
| A_68_P31666414 | chr18:44540418-44540462                           | NM_027490:287      | Dep2       | INSIDE                 | 0.512                                                        | 0.348                          | 1799.47            | 625.56             | 0.178                          | 1427.51            | 253.90             |
| A_68_P22318793 | chr3:89154296-89154340                            | NM_029974:14843    | Dcst1      | INSIDE                 | 0.599                                                        | 0.432                          | 1640.11            | 709.10             | 0.259                          | 1174.76            | 304.42             |
| A_68_P25845477 | chr8:49195740-49195784                            | NM_001161515:396   | Detd       | INSIDE                 | 0.032                                                        | 323.808                        | 1628.66            | 527373.50          | 10.284                         | 1739.52            | 17888.47           |
| A_68_P27534905 | chr10:126703422-126703466                         | NM_001190453:127   | Dctn2      | INSIDE                 | 0.204                                                        | 14.133                         | 3482.31            | 49215.90           | 2.885                          | 2487.36            | 7175.26            |
| A_68_P27534904 | chr10:126703309-126703353                         | NM_001190453:13    | Dctn2      | INSIDE                 | 0.401                                                        | 0.554                          | 3230.13            | 1790.77            | 0.222                          | 2102.14            | 467.24             |
| A_68_P25772218 | chr8:35171274-35171318                            | NM_011722:269      | Dctn6      | INSIDE                 | 0.26                                                         | 5.825                          | 2103.22            | 12251.53           | 1.516                          | 1540.45            | 2334.72            |
| A_68_P25504836 | chr7:134404187-134404231                          | NM_023203:-27      | Detpp1     | PROMOTER               | 0.484                                                        | 0.255                          | 2013.31            | 513.23             | 0.123                          | 1393.97            | 171.84             |
| A_68_P25504835 | chr7:134404064-134404108                          | NM_023203:95       | Detpp1     | INSIDE                 | 0.65                                                         | 3.964                          | 4662.59            | 18481.05           | 2.577                          | 3374.00            | 8696.03            |
| A_68_P23797911 | chr5:73882756-73882800                            | NM_001190733:514   | Dcun1d4    | INSIDE                 | 0.062                                                        | 6.439                          | 11008.92           | 70884.21           | 0.402                          | 8520.39            | 3421.00            |
| A_68_P23797912 | chr5:73883055-73883099                            | NM_001190733:812   | Dcun1d4    | INSIDE                 | 0.075                                                        | 28.203                         | 15266.92           | 430570.40          | 2.119                          | 14251.19           | 30193.34           |
| A_68_P23797913 | chr5:73883146-73883190                            | NM_001190733:904   | Dcun1d4    | INSIDE                 | 0.174                                                        | 21.160                         | 13763.10           | 291227.70          | 3.671                          | 11169.76           | 41008.77           |
| A_68_P23797905 | chr5:73882068-73882112                            | NM_001190733:-174  | Dcun1d4    | PROMOTER               | 0.469                                                        | 0.641                          | 804.77             | 515.58             | 0.301                          | 680.94             | 204.73             |
| A_68_P26286958 | chr9:7184623-7184667                              | NM_029775:79       | Dcun1d5    | INSIDE                 | 0.36                                                         | 8.667                          | 600.98             | 5208.75            | 3.118                          | 604.61             | 1885.14            |
| A_68_P28186436 | chr11:120588411-120588455                         | NM_026428:163      | Dexr       | INSIDE                 | 0.399                                                        | 0.200                          | 2955.28            | 591.86             | 0.08                           | 2128.55            | 170.09             |
| A_68_P22610589 | chr3:145421770-145421814                          | NM_026993:137      | Ddah1      | INSIDE                 | 0.45                                                         | 5.864                          | 2797.07            | 16403.12           | 2.637                          | 2330.25            | 6145.65            |

| ProbeName      | Target position of probe on CpG island microarray | TargetID          | GeneSymbol | CpG island Description | Ratio of relative methylation (TiO <sub>2</sub> -NP/Vehicle) | Sham group                     |                    |                    | TiO <sub>2</sub> -H group      |                    |                    |
|----------------|---------------------------------------------------|-------------------|------------|------------------------|--------------------------------------------------------------|--------------------------------|--------------------|--------------------|--------------------------------|--------------------|--------------------|
|                |                                                   |                   |            |                        |                                                              | Relative methylation (Cy5/Cy3) | Cy3 signal (Input) | Cy5 signal (MeDIP) | Relative methylation (Cy5/Cy3) | Cy3 signal (Input) | Cy5 signal (MeDIP) |
| A_68_P31157314 | chr17:35196243-35196287                           | NM_001190449:285  | Ddah2      | INSIDE                 | 0.399                                                        | 1.627                          | 3268.87            | 5317.91            | 0.648                          | 2467.34            | 1599.73            |
| A_68_P29571979 | chr14:46277367-46277411                           | NM_001039106:430  | Ddhd1      | INSIDE                 | 0.411                                                        | 10.022                         | 7838.84            | 78558.79           | 4.115                          | 6513.02            | 26804.03           |
| A_68_P25728861 | chr8:26864655-26864699                            | NM_028102:76      | Ddhd2      | INSIDE                 | 0.264                                                        | 11.336                         | 2293.48            | 25997.79           | 2.988                          | 1950.92            | 5828.56            |
| A_68_P23365645 | chr4:141279495-141279539                          | NM_001017966:-182 | Ddi2       | PROMOTER               | 0.132                                                        | 17.908                         | 1213.28            | 21727.21           | 2.361                          | 1002.17            | 2365.81            |
| A_68_P27535079 | chr10:126727356-126727401                         | NM_007837:-470    | Ddit3      | DIVERGENT_PROMOTER     | 0.462                                                        | 4.564                          | 1745.63            | 7967.43            | 2.108                          | 1257.85            | 2651.32            |
| A_68_P27171643 | chr10:59415089-59415133                           | NM_029083:-592    | Ddit4      | PROMOTER               | 0.372                                                        | 0.309                          | 1903.83            | 588.52             | 0.115                          | 1471.91            | 169.09             |
| A_68_P22564417 | chr3:137286650-137286694                          | NM_030143:37      | Ddit4l     | INSIDE                 | 0.638                                                        | 2.460                          | 1423.87            | 3502.19            | 1.57                           | 1243.61            | 1952.75            |
| A_68_P30476596 | chr15:98637471-98637515                           | NM_001013741:864  | Ddn        | INSIDE                 | 0.431                                                        | 7.112                          | 1852.08            | 13172.41           | 3.067                          | 1502.45            | 4608.33            |
| A_68_P31160531 | chr17:35837972-35838016                           | NM_001198833:-459 | Ddr1       | PROMOTER               | 0.493                                                        | 0.410                          | 1927.63            | 789.47             | 0.202                          | 1593.50            | 321.55             |
| A_68_P26519504 | chr9:53055815-53055859                            | NM_029936:381     | Ddx10      | INSIDE                 | 0.091                                                        | 7.885                          | 11952.62           | 94246.19           | 0.717                          | 8271.68            | 5930.36            |
| A_68_P30367146 | chr15:79376680-79376724                           | NM_199079:287     | Ddx17      | INSIDE                 | 0.405                                                        | 3.900                          | 1702.08            | 6637.67            | 1.579                          | 1236.09            | 1952.26            |
| A_68_P20567558 | chr1:123464212-123464256                          | NM_025860:323     | Ddx18      | INSIDE                 | 0.234                                                        | 1.570                          | 1789.67            | 2809.15            | 0.367                          | 1426.47            | 523.84             |
| A_68_P26166134 | chr8:113551628-113551672                          | NM_001190800:20   | Ddx19b     | INSIDE                 | 0.63                                                         | 4.436                          | 2211.50            | 9809.13            | 2.796                          | 1779.54            | 4976.10            |
| A_68_P22398585 | chr3:105490135-105490179                          | NM_017397:333     | Ddx20      | INSIDE                 | 0.484                                                        | 6.710                          | 1321.30            | 8865.42            | 3.247                          | 1141.50            | 3706.15            |
| A_68_P26016158 | chr8:86239347-86239391                            | NM_197982:293     | Ddx39      | INSIDE                 | 0.226                                                        | 0.310                          | 5014.24            | 1554.21            | 0.07                           | 3640.02            | 255.44             |
| A_68_P32265732 | chrX:12859122-12859166                            | NM_010028:997     | Ddx3x      | INSIDE                 | 0.573                                                        | 3.598                          | 724.48             | 2606.66            | 2.063                          | 915.37             | 1888.62            |
| A_68_P32265727 | chrX:12858577-12858621                            | NM_010028:451     | Ddx3x      | INSIDE                 | 0.562                                                        | 0.655                          | 821.03             | 537.77             | 0.368                          | 1204.65            | 443.29             |
| A_68_P32265729 | chrX:12858825-12858869                            | NM_010028:699     | Ddx3x      | INSIDE                 | 0.467                                                        | 3.610                          | 661.98             | 2389.75            | 1.685                          | 986.81             | 1662.34            |
| A_68_P32265730 | chrX:12858920-12858964                            | NM_010028:795     | Ddx3x      | INSIDE                 | 0.462                                                        | 4.906                          | 287.65             | 1411.29            | 2.268                          | 356.23             | 807.90             |
| A_68_P29335931 | chr13:113442236-113442280                         | NM_001145885:260  | Ddx4       | INSIDE                 | 0.579                                                        | 4.909                          | 1076.86            | 5286.76            | 2.841                          | 989.81             | 2811.90            |
| A_68_P29335930 | chr13:113442131-113442175                         | NM_001145885:366  | Ddx4       | INSIDE                 | 0.416                                                        | 3.482                          | 2258.55            | 7863.71            | 1.449                          | 1756.08            | 2544.04            |
| A_68_P29055657 | chr13:55638051-55638100                           | NM_134059:-56     | Ddx4l      | PROMOTER               | 0.399                                                        | 0.628                          | 964.35             | 605.26             | 0.251                          | 690.81             | 173.17             |
| A_68_P26659378 | chr9:78243891-78243935                            | NM_001191044:329  | Ddx43      | INSIDE                 | 0.585                                                        | 7.303                          | 1536.34            | 11220.55           | 4.274                          | 1291.75            | 5520.44            |
| A_68_P28103521 | chr11:106649919-106649963                         | NM_007840:-132    | Ddx5       | DIVERGENT_PROMOTER     | 0.139                                                        | 45.067                         | 9198.80            | 414562.10          | 6.26                           | 13912.83           | 87092.01           |
| A_68_P27187154 | chr10:62113629-62113673                           | NM_053183:296     | Ddx50      | INSIDE                 | 0.124                                                        | 0.450                          | 4852.59            | 2185.45            | 0.056                          | 3482.73            | 193.74             |
| A_68_P27187162 | chr10:62114413-62114457                           | NM_053183:-488    | Ddx50      | PROMOTER               | 0.226                                                        | 0.572                          | 1753.08            | 1002.26            | 0.129                          | 1352.62            | 175.10             |
| A_68_P27187161 | chr10:62114275-62114319                           | NM_053183:-350    | Ddx50      | PROMOTER               | 0.496                                                        | 0.398                          | 1607.48            | 639.72             | 0.197                          | 1284.21            | 253.45             |
| A_68_P27187153 | chr10:62113528-62113572                           | NM_053183:396     | Ddx50      | INSIDE                 | 0.551                                                        | 3.245                          | 1107.59            | 3594.01            | 1.788                          | 1002.60            | 1792.24            |
| A_68_P23981086 | chr5:111082431-111082475                          | NM_027156:-17     | Ddx51      | DIVERGENT_PROMOTER     | 0.361                                                        | 6.970                          | 789.45             | 5502.19            | 2.517                          | 696.94             | 1753.86            |
| A_68_P23981092 | chr5:111083016-111083060                          | NM_027156:569     | Ddx51      | INSIDE                 | 0.437                                                        | 0.300                          | 1630.05            | 488.41             | 0.131                          | 1346.74            | 176.16             |
| A_68_P23981091 | chr5:111082933-111082977                          | NM_027156:485     | Ddx51      | INSIDE                 | 0.537                                                        | 0.501                          | 2127.71            | 1066.46            | 0.269                          | 1491.08            | 401.41             |
| A_68_P20645802 | chr1:138311830-138311874                          | NM_026500:5       | Ddx59      | INSIDE                 | 0.521                                                        | 5.839                          | 650.08             | 3795.51            | 3.041                          | 549.49             | 1671.18            |
| A_68_P26468513 | chr9:44413201-44413245                            | NM_001110826:248  | Ddx6       | INSIDE                 | 0.424                                                        | 10.879                         | 9224.69            | 100351.10          | 4.613                          | 7085.37            | 32685.89           |
| A_68_P26468515 | chr9:44413405-44413449                            | NM_001110826:452  | Ddx6       | INSIDE                 | 0.459                                                        | 0.452                          | 2280.14            | 1031.53            | 0.208                          | 1626.84            | 337.74             |
| A_68_P26885056 | chr9:121619308-121619352                          | NM_026794:-176    | Deb1       | DIVERGENT_PROMOTER     | 0.521                                                        | 3.723                          | 775.58             | 2887.44            | 1.939                          | 710.60             | 1377.53            |
| A_68_P22752472 | chr4:15872547-15872591                            | NM_026172:86      | Decr1      | INSIDE                 | 0.119                                                        | 39.957                         | 2408.67            | 96242.29           | 4.75                           | 2160.21            | 10262.00           |
| A_68_P22752471 | chr4:15872402-15872446                            | NM_026172:230     | Decr1      | INSIDE                 | 0.532                                                        | 5.502                          | 3132.49            | 17235.99           | 2.93                           | 2522.66            | 7390.14            |
| A_68_P25009065 | chr7:26004933-26004977                            | NM_207677:-76     | Dedd2      | DIVERGENT_PROMOTER     | 0.323                                                        | 7.153                          | 6885.05            | 49248.39           | 2.308                          | 5664.48            | 13073.28           |
| A_68_P25009060 | chr7:26004436-26004480                            | NM_207677:420     | Dedd2      | INSIDE                 | 0.631                                                        | 0.700                          | 2854.88            | 1997.00            | 0.441                          | 1958.50            | 864.23             |
| A_68_P26239891 | chr8:125967011-125967055                          | NM_054046:147     | Def8       | INSIDE                 | 0.541                                                        | 0.334                          | 3707.19            | 1238.43            | 0.181                          | 2691.08            | 486.29             |
| A_68_P20885892 | chr1:184212460-184212504                          | NM_007853:408     | Degs1      | INSIDE                 | 0.114                                                        | 17.948                         | 543.77             | 9759.45            | 2.045                          | 463.51             | 947.70             |
| A_68_P29011724 | chr13:47201824-47201868                           | NM_025900:-257    | Dek        | PROMOTER               | 0.42                                                         | 0.279                          | 2109.84            | 589.48             | 0.117                          | 1590.23            | 186.46             |
| A_68_P21147278 | chr2:38142391-38142435                            | NM_146122:492     | Dennd1a    | INSIDE                 | 0.449                                                        | 0.456                          | 4337.31            | 1976.77            | 0.205                          | 3339.93            | 683.31             |
| A_68_P20660113 | chr1:140860423-140860467                          | NM_181347:-3853   | Dennd1b    | PROMOTER               | 0.382                                                        | 8.761                          | 841.45             | 7371.74            | 3.345                          | 740.23             | 2476.04            |
| A_68_P24383687 | chr6:39507859-39507903                            | NM_172477:-47     | Dennd2a    | PROMOTER               | 0.457                                                        | 3.647                          | 2528.24            | 9221.71            | 1.669                          | 1927.46            | 3216.24            |
| A_68_P22401916 | chr3:106285683-106285727                          | NM_001093754:356  | Dennd2d    | INSIDE                 | 0.395                                                        | 0.659                          | 6745.20            | 4445.56            | 0.261                          | 4900.81            | 1277.30            |

| ProbeName      | Target position of probe on CpG island microarray | TargetID           | GeneSymbol | CpG island Description | Ratio of relative methylation (TiO <sub>2</sub> -NP/Vehicle) | Sham group                     |                    |                    | TiO <sub>2</sub> -H group      |                    |                    |
|----------------|---------------------------------------------------|--------------------|------------|------------------------|--------------------------------------------------------------|--------------------------------|--------------------|--------------------|--------------------------------|--------------------|--------------------|
|                |                                                   |                    |            |                        |                                                              | Relative methylation (Cy5/Cy3) | Cy3 signal (Input) | Cy5 signal (MeDIP) | Relative methylation (Cy5/Cy3) | Cy3 signal (Input) | Cy5 signal (MeDIP) |
| A_68_P30330811 | chr15:73342672-73342717                           | NM_001081066:-295  | Dennd3     | PROMOTER               | 0.643                                                        | 0.729                          | 1609.56            | 1172.67            | 0.469                          | 1273.10            | 596.73             |
| A_68_P26584123 | chr9:64659420-64659464                            | NM_001162917:625   | Dennd4a    | INSIDE                 | 0.359                                                        | 0.270                          | 4137.13            | 1118.65            | 0.097                          | 3013.55            | 292.63             |
| A_68_P26584118 | chr9:64659001-64659045                            | NM_001162917:205   | Dennd4a    | INSIDE                 | 0.284                                                        | 1.568                          | 8897.12            | 13948.25           | 0.446                          | 7041.90            | 3140.06            |
| A_68_P22324271 | chr3:90069155-90069199                            | NM_201407:-1279    | Dennd4b    | PROMOTER               | 0.445                                                        | 0.569                          | 2686.69            | 1528.34            | 0.253                          | 1954.74            | 495.02             |
| A_68_P23081278 | chr4:86395175-86395219                            | NM_001081014:738   | Dennd4c    | INSIDE                 | 0.229                                                        | 0.526                          | 3200.32            | 1681.99            | 0.12                           | 2439.53            | 293.69             |
| A_68_P23081271 | chr4:86394332-86394376                            | NM_001081014:-104  | Dennd4c    | PROMOTER               | 0.627                                                        | 2.373                          | 1574.51            | 3736.34            | 1.488                          | 1363.29            | 2028.42            |
| A_68_P25410984 | chr7:117103504-117103548                          | NM_021494:410      | Dennd5a    | INSIDE                 | 0.53                                                         | 3.767                          | 1225.14            | 4615.07            | 1.995                          | 999.80             | 1995.09            |
| A_68_P24058184 | chr5:124357527-124357571                          | NM_026603:265      | Denr       | INSIDE                 | 0.555                                                        | 0.463                          | 1514.28            | 701.37             | 0.257                          | 1305.54            | 335.70             |
| A_68_P24058180 | chr5:124357134-124357178                          | NM_026603:-127     | Denr       | PROMOTER               | 0.596                                                        | 0.454                          | 3377.27            | 1532.03            | 0.27                           | 2848.07            | 769.71             |
| A_68_P29310806 | chr13:109106501-109106545                         | NM_178683:-8       | Depdc1b    | PROMOTER               | 0.435                                                        | 0.418                          | 3675.73            | 1535.07            | 0.182                          | 2718.30            | 493.38             |
| A_68_P23585886 | chr5:33206293-33206337                            | NM_177786:-55      | Depdc5     | DIVERGENT_PROMOTER     | 0.647                                                        | 2.331                          | 1799.56            | 4194.97            | 1.509                          | 1584.44            | 2390.16            |
| A_68_P30230393 | chr15:54944017-54944061                           | NM_145470:1        | Deptor     | INSIDE                 | 0.619                                                        | 0.248                          | 2399.95            | 595.03             | 0.153                          | 1836.11            | 281.63             |
| A_68_P30244836 | chr15:57723668-57723712                           | NM_024207:283      | Der1l      | INSIDE                 | 0.567                                                        | 3.214                          | 1404.45            | 4514.49            | 1.823                          | 1222.06            | 2227.63            |
| A_68_P27259217 | chr10:75355978-75356022                           | NM_024440:-142     | Der13      | PROMOTER               | 0.21                                                         | 0.624                          | 6040.04            | 3768.93            | 0.131                          | 4003.56            | 525.26             |
| A_68_P23398684 | chr4:148478173-148478217                          | NM_010044:-67      | Dffa       | DIVERGENT_PROMOTER     | 0.642                                                        | 0.628                          | 3648.23            | 2291.78            | 0.403                          | 2619.50            | 1056.67            |
| A_68_P30348811 | chr15:76341995-76342039                           | NM_010046:232      | Dgat1      | INSIDE                 | 0.6                                                          | 2.780                          | 3924.72            | 10911.99           | 1.669                          | 3012.44            | 5027.84            |
| A_68_P27543002 | chr10:128181219-128181263                         | NM_016811:-128     | Dgka       | DIVERGENT_PROMOTER     | 0.481                                                        | 0.238                          | 2633.70            | 626.76             | 0.114                          | 1962.97            | 224.49             |
| A_68_P30599074 | chr16:22656977-22657021                           | NM_138650:306      | Dgkg       | INSIDE                 | 0.607                                                        | 0.588                          | 1230.63            | 723.43             | 0.357                          | 959.91             | 342.33             |
| A_68_P30599077 | chr16:22657267-22657311                           | NM_138650:16       | Dgkg       | INSIDE                 | 0.542                                                        | 3.115                          | 1765.89            | 5500.20            | 1.69                           | 1521.65            | 2570.96            |
| A_68_P29747537 | chr14:79124881-79124925                           | NM_001081336:-6    | Dgkh       | PROMOTER               | 0.572                                                        | 3.626                          | 1006.54            | 3649.66            | 2.072                          | 745.91             | 1545.86            |
| A_68_P24371747 | chr6:37249971-37250015                            | NM_001081206:-16   | Dgki       | PROMOTER               | 0.335                                                        | 6.393                          | 2254.33            | 14412.02           | 2.14                           | 2041.71            | 4369.81            |
| A_68_P21425706 | chr2:91805641-91805685                            | NM_138306:-1942    | Dgkz       | PROMOTER               | 0.651                                                        | 2.639                          | 777.03             | 2050.67            | 1.717                          | 762.90             | 1310.17            |
| A_68_P25603236 | chr7:151015869-151015913                          | NM_007856:6819     | Dher7      | INSIDE                 | 0.623                                                        | 0.607                          | 1330.03            | 807.58             | 0.378                          | 1006.46            | 380.57             |
| A_68_P25603237 | chr7:151015959-151016003                          | NM_007856:6909     | Dher7      | INSIDE                 | 0.598                                                        | 2.534                          | 1306.38            | 3310.32            | 1.516                          | 1126.15            | 1706.89            |
| A_68_P23320471 | chr4:133556862-133556906                          | NM_026144:-105     | Dhdds      | PROMOTER               | 0.54                                                         | 11.936                         | 813.30             | 9707.32            | 6.445                          | 665.36             | 4288.38            |
| A_68_P27979838 | chr11:84642248-84642292                           | NM_177564:235      | Dhrs11     | INSIDE                 | 0.656                                                        | 0.553                          | 3173.74            | 1753.63            | 0.363                          | 2352.49            | 852.96             |
| A_68_P23379974 | chr4:144482718-144482768                          | NM_011303:-297     | Dhrs3      | PROMOTER               | 0.376                                                        | 0.368                          | 1790.23            | 658.30             | 0.138                          | 1246.50            | 172.26             |
| A_68_P33007785 | chr4_random:127689-127733                         | NM_001033326:17909 | Dhrsx      | INSIDE                 | 0.102                                                        | 64.425                         | 8286.35            | 533849.80          | 6.567                          | 11135.68           | 73124.40           |
| A_68_P33007787 | chr4_random:127945-127989                         | NM_001033326:18165 | Dhrsx      | INSIDE                 | 0.134                                                        | 16.068                         | 7130.96            | 114583.00          | 2.146                          | 6525.85            | 14005.12           |
| A_68_P33007786 | chr4_random:127770-127814                         | NM_001033326:17991 | Dhrsx      | INSIDE                 | 0.141                                                        | 31.561                         | 10966.91           | 346127.50          | 4.455                          | 11105.85           | 49482.05           |
| A_68_P33007798 | chr4_random:129389-129433                         | NM_001033326:19609 | Dhrsx      | INSIDE                 | 0.184                                                        | 18.031                         | 1802.85            | 32507.13           | 3.326                          | 1528.65            | 5083.70            |
| A_68_P33008826 | chr4_random:110027-110071                         | NM_001033326:247   | Dhrsx      | INSIDE                 | 0.382                                                        | 13.727                         | 1803.35            | 24754.46           | 5.245                          | 1560.27            | 8184.30            |
| A_68_P33007792 | chr4_random:128621-128665                         | NM_001033326:18841 | Dhrsx      | INSIDE                 | 0.405                                                        | 6.909                          | 4644.84            | 32090.81           | 2.801                          | 3903.58            | 10935.14           |
| A_68_P33007796 | chr4_random:129068-129112                         | NM_001033326:19289 | Dhrsx      | INSIDE                 | 0.417                                                        | 17.938                         | 8042.91            | 144271.80          | 7.478                          | 6325.12            | 47299.27           |
| A_68_P33007795 | chr4_random:128995-129039                         | NM_001033326:19215 | Dhrsx      | INSIDE                 | 0.425                                                        | 15.826                         | 3871.96            | 61278.76           | 6.727                          | 2721.39            | 18307.87           |
| A_68_P33007797 | chr4_random:129202-129246                         | NM_001033326:19423 | Dhrsx      | INSIDE                 | 0.432                                                        | 7.521                          | 1095.16            | 8236.50            | 3.251                          | 1101.20            | 3580.38            |
| A_68_P33008823 | chr4_random:109636-109680                         | NM_001033326:-143  | Dhrsx      | PROMOTER               | 0.443                                                        | 12.008                         | 5296.78            | 63601.85           | 5.316                          | 5681.98            | 30208.22           |
| A_68_P33007789 | chr4_random:128217-128261                         | NM_001033326:18437 | Dhrsx      | INSIDE                 | 0.395                                                        | 4.172                          | 2211.97            | 9227.52            | 1.647                          | 1665.24            | 2742.65            |
| A_68_P33007788 | chr4_random:128082-128126                         | NM_001033326:18303 | Dhrsx      | INSIDE                 | 0.128                                                        | 11.744                         | 7505.04            | 88140.66           | 1.506                          | 6219.22            | 9363.54            |
| A_68_P23693364 | chr5:52581717-52581761                            | NM_007839:20       | Dhx15      | INSIDE                 | 0.216                                                        | 2.334                          | 1018.27            | 2376.18            | 0.505                          | 945.10             | 476.85             |
| A_68_P31161462 | chr17:36016904-36016948                           | NM_026987:204      | Dhx16      | INSIDE                 | 0.48                                                         | 6.575                          | 741.26             | 4873.42            | 3.153                          | 620.96             | 1958.11            |
| A_68_P31161463 | chr17:36016977-36017021                           | NM_026987:276      | Dhx16      | INSIDE                 | 0.573                                                        | 4.052                          | 978.26             | 3964.01            | 2.323                          | 909.08             | 2112.12            |
| A_68_P26822031 | chr9:110019702-110019746                          | NM_133347:-1638    | Dhx30      | PROMOTER               | 0.63                                                         | 2.773                          | 1298.46            | 3600.71            | 1.748                          | 1129.09            | 1973.38            |
| A_68_P26822035 | chr9:110020257-110020301                          | NM_133347:-2192    | Dhx30      | PROMOTER               | 0.441                                                        | 3.165                          | 2643.15            | 8364.72            | 1.396                          | 2282.66            | 3186.87            |
| A_68_P25542609 | chr7:140968445-140968489                          | NM_133941:20       | Dhx32      | INSIDE                 | 0.453                                                        | 4.230                          | 1253.34            | 5302.09            | 1.915                          | 1147.00            | 2196.60            |
| A_68_P27903827 | chr11:70817840-70817884                           | NM_178367:72       | Dhx33      | INSIDE                 | 0.38                                                         | 6.036                          | 770.98             | 4653.98            | 2.293                          | 663.32             | 1520.80            |

| ProbeName      | Target position of probe on CpG island microarray | TargetID           | GeneSymbol | CpG island Description | Ratio of relative methylation (TiO <sub>2</sub> -NP/Vehicle) | Sham group                     |                    |                    | TiO <sub>2</sub> -H group      |                    |                    |
|----------------|---------------------------------------------------|--------------------|------------|------------------------|--------------------------------------------------------------|--------------------------------|--------------------|--------------------|--------------------------------|--------------------|--------------------|
|                |                                                   |                    |            |                        |                                                              | Relative methylation (Cy5/Cy3) | Cy3 signal (Input) | Cy5 signal (MeDIP) | Relative methylation (Cy5/Cy3) | Cy3 signal (Input) | Cy5 signal (MeDIP) |
| A_68_P21785050 | chr2:158620772-158620816                          | NM_145742:239      | Dhx35      | INSIDE                 | 0.655                                                        | 0.481                          | 999.00             | 480.27             | 0.315                          | 828.79             | 260.84             |
| A_68_P26157751 | chr8:112089473-112089517                          | NM_178380:7        | Dhx38      | INSIDE                 | 0.239                                                        | 0.456                          | 2369.59            | 1080.27            | 0.109                          | 1708.93            | 185.95             |
| A_68_P31630972 | chr18:38094826-38094871                           | NM_007858:217      | Diap1      | INSIDE                 | 0.503                                                        | 7.146                          | 532.32             | 3803.99            | 3.593                          | 417.01             | 1498.11            |
| A_68_P28705225 | chr12:105989571-105989615                         | NM_148948:570      | Dicer1     | INSIDE                 | 0.561                                                        | 0.381                          | 1625.20            | 618.45             | 0.214                          | 1240.61            | 264.93             |
| A_68_P21905697 | chr2:180444518-180444564                          | NM_175551:-7735    | Dido1      | PROMOTER               | 0.017                                                        | 21.434                         | 3271.19            | 70114.96           | 0.371                          | 2462.67            | 912.87             |
| A_68_P30483526 | chr15:99869552-99869596                           | NM_001159361:480   | Dip2b      | INSIDE                 | 0.52                                                         | 5.082                          | 914.30             | 4646.46            | 2.641                          | 792.66             | 2093.57            |
| A_68_P30483524 | chr15:99869292-99869336                           | NM_001159361:220   | Dip2b      | INSIDE                 | 0.542                                                        | 4.811                          | 1564.39            | 7525.50            | 2.608                          | 1533.11            | 3997.99            |
| A_68_P27286934 | chr10:80484978-80485022                           | NM_145217:3122     | Diras1     | INSIDE                 | 0.477                                                        | 0.444                          | 1163.92            | 516.58             | 0.212                          | 899.20             | 190.20             |
| A_68_P30672037 | chr16:35769289-35769333                           | NM_153550:132      | Dirc2      | INSIDE                 | 0.454                                                        | 7.041                          | 2040.44            | 14367.07           | 3.196                          | 1643.83            | 5253.46            |
| A_68_P29841645 | chr14:99499049-99499093                           | NM_028315:-81      | Dis3       | PROMOTER               | 0.535                                                        | 3.502                          | 659.14             | 2308.31            | 1.872                          | 651.39             | 1219.36            |
| A_68_P26581355 | chr9:64188489-64188533                            | NM_172519:-246     | Dis3l1     | PROMOTER               | 0.303                                                        | 0.469                          | 1682.53            | 788.63             | 0.142                          | 1302.98            | 184.92             |
| A_68_P26249219 | chr8:127578258-127578302                          | NM_174853:186      | Disc1      | INSIDE                 | 0.327                                                        | 10.409                         | 15893.16           | 165434.10          | 3.404                          | 13119.40           | 44663.73           |
| A_68_P33015623 | chr1_random:50870-50914                           | NM_026866:134446   | Disp1      | INSIDE                 | 0.243                                                        | 6.700                          | 1619.39            | 10849.99           | 1.631                          | 1109.79            | 1809.71            |
| A_68_P26505085 | chr9:50507371-50507415                            | NM_178118:28697    | Dixdc1     | INSIDE                 | 0.422                                                        | 0.447                          | 1070.80            | 478.83             | 0.189                          | 901.26             | 169.96             |
| A_68_P25422972 | chr7:119301935-119301979                          | NM_015814:615      | Dkk3       | INSIDE                 | 0.051                                                        | 1.981                          | 7428.89            | 14720.23           | 0.101                          | 4719.05            | 477.76             |
| A_68_P25422973 | chr7:119302042-119302086                          | NM_015814:507      | Dkk3       | INSIDE                 | 0.35                                                         | 0.591                          | 1347.09            | 795.53             | 0.207                          | 1017.41            | 210.48             |
| A_68_P26504861 | chr9:50467491-50467535                            | NM_145614:373      | Dlat       | INSIDE                 | 0.487                                                        | 6.733                          | 2608.96            | 17565.28           | 3.277                          | 2287.11            | 7494.61            |
| A_68_P28330749 | chr12:32035950-32035994                           | NM_007861:330      | Dld        | INSIDE                 | 0.242                                                        | 16.471                         | 1472.89            | 24260.65           | 3.986                          | 1285.79            | 5124.58            |
| A_68_P29651397 | chr14:62301793-62301837                           | NR_028264:-604     | Dleu2      | PROMOTER               | 0.133                                                        | 33.820                         | 1801.01            | 60910.22           | 4.512                          | 1575.92            | 7110.65            |
| A_68_P29651387 | chr14:62300610-62300654                           | NR_028264:578      | Dleu2      | INSIDE                 | 0.418                                                        | 0.303                          | 3539.51            | 1074.17            | 0.127                          | 2486.23            | 315.26             |
| A_68_P29651430 | chr14:62305865-62305909                           | NR_028264:-4676    | Dleu2      | PROMOTER               | 0.483                                                        | 8.241                          | 1149.58            | 9473.90            | 3.981                          | 1073.08            | 4271.50            |
| A_68_P29651385 | chr14:62300358-62300402                           | NR_028264:830      | Dleu2      | INSIDE                 | 0.568                                                        | 4.961                          | 3998.31            | 19835.99           | 2.816                          | 3117.20            | 8778.21            |
| A_68_P29651395 | chr14:62301504-62301548                           | NR_028264:-316     | Dleu2      | PROMOTER               | 0.49                                                         | 3.345                          | 1117.35            | 3737.30            | 1.639                          | 1016.54            | 1665.98            |
| A_68_P30648664 | chr16:31663664-31663708                           | NM_007862:-438     | Dlg1       | PROMOTER               | 0.39                                                         | 0.222                          | 3867.55            | 859.99             | 0.087                          | 3038.80            | 263.39             |
| A_68_P29470473 | chr14:25064406-25064450                           | NM_001163513:714   | Dlg5       | INSIDE                 | 0.498                                                        | 46.795                         | 415.21             | 19429.75           | 23.291                         | 552.06             | 12857.76           |
| A_68_P29470478 | chr14:25065176-25065220                           | NM_001163513:-56   | Dlg5       | PROMOTER               | 0.591                                                        | 3.651                          | 888.55             | 3244.33            | 2.159                          | 734.67             | 1585.92            |
| A_68_P31330059 | chr17:71007053-71007097                           | NM_001128181:95988 | Dlgap1     | INSIDE                 | 0.036                                                        | 90.238                         | 2860.03            | 258083.40          | 3.226                          | 2685.13            | 8661.43            |
| A_68_P31329272 | chr17:70865492-70865536                           | NM_001128180:-5935 | Dlgap1     | PROMOTER               | 0.422                                                        | 4.556                          | 1875.93            | 8546.88            | 1.921                          | 1246.99            | 2395.79            |
| A_68_P31330058 | chr17:71006929-71006973                           | NM_001128181:95864 | Dlgap1     | INSIDE                 | 0.509                                                        | 3.470                          | 801.76             | 2782.45            | 1.767                          | 595.12             | 1051.65            |
| A_68_P25672261 | chr8:14096967-14097011                            | NM_001145965:1114  | Dlgap2     | INSIDE                 | 0.343                                                        | 7.244                          | 3945.87            | 28584.58           | 2.483                          | 3166.93            | 7864.34            |
| A_68_P25672257 | chr8:14096396-14096440                            | NM_001145965:544   | Dlgap2     | INSIDE                 | 0.459                                                        | 7.008                          | 889.96             | 6236.66            | 3.217                          | 801.54             | 2578.26            |
| A_68_P23284203 | chr4:126911090-126911134                          | NM_198618:64598    | Dlgap3     | INSIDE                 | 0.513                                                        | 3.832                          | 1142.23            | 4377.61            | 1.967                          | 936.95             | 1843.29            |
| A_68_P23284202 | chr4:126910975-126911019                          | NM_198618:64482    | Dlgap3     | INSIDE                 | 0.654                                                        | 2.468                          | 2079.05            | 5131.43            | 1.615                          | 1657.09            | 2675.78            |
| A_68_P23284102 | chr4:126891893-126891937                          | NM_198618:45400    | Dlgap3     | INSIDE                 | 0.148                                                        | 4.805                          | 4749.31            | 22818.46           | 0.712                          | 3542.45            | 2523.44            |
| A_68_P21772346 | chr2:156440160-156440204                          | NM_146128:742      | Dlgap4     | INSIDE                 | 0.645                                                        | 0.373                          | 1732.86            | 646.62             | 0.241                          | 1273.89            | 306.50             |
| A_68_P29582179 | chr14:48037872-48037916                           | NM_144553:188      | Dlgap5     | INSIDE                 | 0.627                                                        | 0.501                          | 3253.48            | 1629.81            | 0.314                          | 2361.43            | 741.19             |
| A_68_P28732711 | chr12:110692025-110692069                         | NM_001190703:382   | Dlk1       | INSIDE                 | 0.246                                                        | 9.275                          | 10239.29           | 94972.59           | 2.285                          | 8356.84            | 19098.28           |
| A_68_P28732710 | chr12:110691897-110691941                         | NM_001190703:254   | Dlk1       | INSIDE                 | 0.298                                                        | 0.395                          | 2246.16            | 888.20             | 0.118                          | 1618.51            | 190.79             |
| A_68_P28732704 | chr12:110691154-110691198                         | NM_001190703:-488  | Dlk1       | PROMOTER               | 0.613                                                        | 0.315                          | 1592.39            | 502.08             | 0.193                          | 1130.44            | 218.33             |
| A_68_P31065266 | chr17:15513473-15513517                           | NM_007865:-707     | Dll1       | PROMOTER               | 0.295                                                        | 13.539                         | 1323.19            | 17914.92           | 3.998                          | 1101.70            | 4404.50            |
| A_68_P31065261 | chr17:15512852-15512896                           | NM_007865:-87      | Dll1       | PROMOTER               | 0.612                                                        | 0.530                          | 1563.73            | 828.15             | 0.324                          | 1193.55            | 387.08             |
| A_68_P31065253 | chr17:15511986-15512030                           | NM_007865:779      | Dll1       | INSIDE                 | 0.636                                                        | 2.992                          | 808.76             | 2420.02            | 1.903                          | 632.74             | 1204.01            |
| A_68_P31065249 | chr17:15511628-15511672                           | NM_007865:1137     | Dll1       | INSIDE                 | 0.552                                                        | 0.551                          | 856.24             | 472.03             | 0.304                          | 682.74             | 207.77             |
| A_68_P25021043 | chr7:29086277-29086321                            | NM_007866:506      | Dll3       | INSIDE                 | 0.267                                                        | 0.351                          | 3738.75            | 1312.09            | 0.094                          | 2985.06            | 279.36             |
| A_68_P25021007 | chr7:29079751-29079795                            | NM_007866:7032     | Dll3       | INSIDE                 | 0.599                                                        | 7.724                          | 1433.21            | 11069.61           | 4.628                          | 1262.28            | 5841.41            |
| A_68_P21569032 | chr2:119148703-119148747                          | NM_019454:-2795    | Dll4       | PROMOTER               | 0.456                                                        | 4.856                          | 1530.44            | 7431.54            | 2.215                          | 1247.18            | 2762.04            |

| ProbeName      | Target position of probe on CpG island microarray | TargetID           | GeneSymbol | CpG island Description | Ratio of relative methylation (TiO <sub>2</sub> -NP/Vehicle) | Sham group                     |                    |                    | TiO <sub>2</sub> -H group      |                    |                    |
|----------------|---------------------------------------------------|--------------------|------------|------------------------|--------------------------------------------------------------|--------------------------------|--------------------|--------------------|--------------------------------|--------------------|--------------------|
|                |                                                   |                    |            |                        |                                                              | Relative methylation (Cy5/Cy3) | Cy3 signal (Input) | Cy5 signal (MeDIP) | Relative methylation (Cy5/Cy3) | Cy3 signal (Input) | Cy5 signal (MeDIP) |
| A_68_P21569026 | chr2:119148000-119148050                          | NM_019454:-3495    | Dll4       | PROMOTER               | 0.376                                                        | 0.627                          | 908.40             | 569.61             | 0.236                          | 790.48             | 186.60             |
| A_68_P21569151 | chr2:119163754-119163798                          | NM_019454:12257    | Dll4       | DOWNSTREAM             | 0.51                                                         | 3.415                          | 1257.37            | 4293.57            | 1.743                          | 1189.51            | 2072.88            |
| A_68_P21319994 | chr2:71367531-71367575                            | NM_010053:51       | Dlx1       | INSIDE                 | 0.577                                                        | 2.507                          | 8298.51            | 20800.57           | 1.445                          | 6612.22            | 9556.67            |
| A_68_P21320094 | chr2:71379207-71379251                            | NR_002854:-3280    | Dlx1as     | PROMOTER               | 0.285                                                        | 1.596                          | 3665.41            | 5851.22            | 0.456                          | 2656.84            | 1210.58            |
| A_68_P28036958 | chr1:195006743-95006787                           | NM_007867:351      | Dlx4       | INSIDE                 | 0.638                                                        | 0.300                          | 3997.38            | 1201.17            | 0.192                          | 2943.26            | 564.37             |
| A_68_P24218861 | chr6:6829299-6829343                              | NM_010056:2748     | Dlx5       | INSIDE                 | 0.285                                                        | 7.114                          | 2021.83            | 14382.96           | 2.028                          | 1612.54            | 3270.84            |
| A_68_P24218878 | chr6:6831381-6831425                              | NM_010056:666      | Dlx5       | INSIDE                 | 0.36                                                         | 4.228                          | 1687.87            | 7136.31            | 1.522                          | 1443.23            | 2197.15            |
| A_68_P24218728 | chr6:6813006-6813052                              | NM_010057:-305     | Dlx6       | PROMOTER               | 0.059                                                        | 51.134                         | 427.69             | 21869.28           | 3.023                          | 360.22             | 1089.01            |
| A_68_P24218732 | chr6:6813819-6813863                              | NM_010057:507      | Dlx6       | INSIDE                 | 0.18                                                         | 0.280                          | 12673.06           | 3549.11            | 0.05                           | 8542.92            | 429.61             |
| A_68_P23236051 | chr4:117354667-117354711                          | NM_023178:142      | Dmap1      | INSIDE                 | 0.507                                                        | 0.190                          | 2404.48            | 455.99             | 0.096                          | 1817.66            | 174.72             |
| A_68_P23236052 | chr4:117354732-117354776                          | NM_023178:76       | Dmap1      | INSIDE                 | 0.585                                                        | 2.668                          | 2920.06            | 7791.93            | 1.56                           | 2392.93            | 3733.24            |
| A_68_P23226835 | chr4:115616658-115616702                          | NM_001025567:-4149 | Dmbx1      | PROMOTER               | 0.487                                                        | 5.990                          | 3268.99            | 19580.02           | 2.916                          | 2581.11            | 7526.92            |
| A_68_P23226836 | chr4:115616847-115616895                          | NM_001025567:-4339 | Dmbx1      | PROMOTER               | 0.089                                                        | 2.491                          | 1113.50            | 2773.65            | 0.221                          | 788.76             | 174.38             |
| A_68_P32030090 | chr19:25580813-25580857                           | NM_015826:639      | Dmrt1      | INSIDE                 | 0.629                                                        | 0.414                          | 4812.90            | 1992.83            | 0.26                           | 3409.31            | 887.88             |
| A_68_P32030095 | chr19:25581366-25581410                           | NM_015826:1193     | Dmrt1      | INSIDE                 | 0.345                                                        | 5.960                          | 529.90             | 3158.39            | 2.055                          | 517.51             | 1063.69            |
| A_68_P32031149 | chr19:25746643-25746687                           | NM_145831:-236     | Dmrt2      | PROMOTER               | 0.581                                                        | 7.249                          | 1336.82            | 9690.69            | 4.21                           | 1075.64            | 4528.09            |
| A_68_P23203782 | chr4:109656380-109656424                          | NM_172296:5773     | Dmrt2      | DOWNSTREAM             | 0.208                                                        | 10.106                         | 1407.13            | 14220.11           | 2.099                          | 1464.29            | 3073.70            |
| A_68_P23203724 | chr4:109649844-109649888                          | NM_172296:-763     | Dmrt2      | PROMOTER               | 0.291                                                        | 121.929                        | 8082.71            | 985513.10          | 35.514                         | 15549.77           | 552236.40          |
| A_68_P23203774 | chr4:109655335-109655379                          | NM_172296:4727     | Dmrt2      | INSIDE                 | 0.507                                                        | 7.550                          | 3077.05            | 23232.37           | 3.831                          | 2522.57            | 9664.16            |
| A_68_P23203768 | chr4:109654665-109654709                          | NM_172296:4057     | Dmrt2      | INSIDE                 | 0.657                                                        | 2.954                          | 954.12             | 2818.81            | 1.94                           | 756.62             | 1468.12            |
| A_68_P23203773 | chr4:109655219-109655263                          | NM_172296:4611     | Dmrt2      | INSIDE                 | 0.51                                                         | 0.665                          | 1139.66            | 758.39             | 0.34                           | 951.45             | 323.09             |
| A_68_P23203770 | chr4:109654911-109654955                          | NM_172296:4303     | Dmrt2      | INSIDE                 | 0.538                                                        | 2.867                          | 1248.79            | 3580.84            | 1.542                          | 1086.84            | 1676.19            |
| A_68_P23471513 | chr5:9161567-9161611                              | NM_001110327:188   | Dmtf1      | INSIDE                 | 0.617                                                        | 5.639                          | 1528.65            | 8619.96            | 3.479                          | 1372.97            | 4776.48            |
| A_68_P26526109 | chr9:54349056-54349100                            | NM_172771:355      | Dmx12      | INSIDE                 | 0.288                                                        | 9.155                          | 2698.03            | 24701.73           | 2.639                          | 2665.42            | 7033.24            |
| A_68_P26526112 | chr9:54349310-54349354                            | NM_172771:101      | Dmx12      | INSIDE                 | 0.623                                                        | 5.160                          | 1932.73            | 9972.70            | 3.214                          | 1531.74            | 4922.86            |
| A_68_P26527193 | chr9:54547061-54547105                            | NM_021422:-283     | Dnaja4     | PROMOTER               | 0.623                                                        | 0.446                          | 6973.54            | 3108.14            | 0.278                          | 4447.90            | 1234.44            |
| A_68_P26015683 | chr8:86132210-86132254                            | NM_018808:159      | Dnajb1     | INSIDE                 | 0.47                                                         | 7.191                          | 2673.40            | 19225.00           | 3.382                          | 2084.68            | 7050.44            |
| A_68_P26015679 | chr8:86131823-86131867                            | NM_018808:-229     | Dnajb1     | PROMOTER               | 0.564                                                        | 0.303                          | 4023.76            | 1217.48            | 0.171                          | 2917.97            | 498.07             |
| A_68_P26015682 | chr8:86132133-86132177                            | NM_018808:81       | Dnajb1     | INSIDE                 | 0.515                                                        | 0.579                          | 1364.60            | 789.48             | 0.298                          | 1070.77            | 318.80             |
| A_68_P20352841 | chr1:75233173-75233217                            | NM_001159885:-82   | Dnajb2     | PROMOTER               | 0.288                                                        | 0.257                          | 3327.35            | 853.97             | 0.074                          | 2427.45            | 179.60             |
| A_68_P20422167 | chr1:90102351-90102395                            | NM_008299:-49      | Dnajb3     | DIVERGENT_PROMOTER     | 0.311                                                        | 17.249                         | 1709.35            | 29485.20           | 5.359                          | 1612.74            | 8642.06            |
| A_68_P20422165 | chr1:90102210-90102254                            | NM_008299:91       | Dnajb3     | INSIDE                 | 0.65                                                         | 4.023                          | 787.18             | 3166.91            | 2.615                          | 642.81             | 1681.22            |
| A_68_P22869097 | chr4:42963079-42963123                            | NM_019874:-2865    | Dnajb5     | PROMOTER               | 0.273                                                        | 1.643                          | 9149.84            | 15036.31           | 0.449                          | 7435.32            | 3337.94            |
| A_68_P28396964 | chr12:45311296-45311340                           | NM_013760:-263     | Dnajb9     | PROMOTER               | 0.47                                                         | 4.711                          | 1125.02            | 5300.14            | 2.216                          | 963.24             | 2135.01            |
| A_68_P28396959 | chr12:45310845-45310889                           | NM_013760:189      | Dnajb9     | INSIDE                 | 0.62                                                         | 0.375                          | 1932.72            | 724.84             | 0.233                          | 1354.14            | 315.03             |
| A_68_P21039675 | chr2:18314331-18314375                            | NM_001190817:105   | Dnajc1     | INSIDE                 | 0.351                                                        | 7.825                          | 2043.12            | 15986.49           | 2.747                          | 1867.52            | 5130.76            |
| A_68_P21374004 | chr2:80155781-80155825                            | NM_024181:180      | Dnajc10    | INSIDE                 | 0.488                                                        | 3.006                          | 2570.47            | 7726.38            | 1.466                          | 2308.90            | 3385.12            |
| A_68_P23415470 | chr4:151308129-151308173                          | NM_172704:322      | Dnajc11    | INSIDE                 | 0.648                                                        | 3.443                          | 526.10             | 1811.38            | 2.232                          | 469.64             | 1048.00            |
| A_68_P26790788 | chr9:104165092-104165136                          | NM_001163026:146   | Dnajc13    | INSIDE                 | 0.206                                                        | 16.631                         | 1978.08            | 32897.61           | 3.427                          | 1919.77            | 6579.55            |
| A_68_P26790789 | chr9:104165231-104165275                          | NM_001163026:8     | Dnajc13    | INSIDE                 | 0.373                                                        | 0.240                          | 2466.83            | 593.23             | 0.09                           | 1912.01            | 171.58             |
| A_68_P26790786 | chr9:104164871-104164915                          | NM_001163026:368   | Dnajc13    | INSIDE                 | 0.472                                                        | 0.433                          | 1920.59            | 830.74             | 0.204                          | 1602.66            | 327.24             |
| A_68_P26790784 | chr9:104164628-104164672                          | NM_001163026:610   | Dnajc13    | INSIDE                 | 0.497                                                        | 0.515                          | 1212.70            | 624.92             | 0.256                          | 998.56             | 255.73             |
| A_68_P23365986 | chr4:141346174-141346218                          | NM_172338:363      | Dnajc16    | INSIDE                 | 0.409                                                        | 0.400                          | 1789.07            | 715.09             | 0.164                          | 1294.99            | 211.78             |
| A_68_P23365990 | chr4:141346639-141346683                          | NM_172338:-101     | Dnajc16    | DIVERGENT_PROMOTER     | 0.523                                                        | 3.452                          | 2002.55            | 6913.20            | 1.805                          | 1717.60            | 3099.53            |
| A_68_P30010737 | chr15:10399801-10399845                           | NM_030046:449      | Dnajc21    | INSIDE                 | 0.608                                                        | 7.805                          | 1522.65            | 11883.78           | 4.745                          | 1284.58            | 6095.83            |
| A_68_P30478229 | chr15:98928779-98928823                           | NM_176835:-1114    | Dnajc22    | PROMOTER               | 0.113                                                        | 66.058                         | 5624.69            | 371554.10          | 7.457                          | 5794.86            | 43214.53           |

| ProbeName      | Target position of probe on CpG island microarray | TargetID            | GeneSymbol | CpG island Description | Ratio of relative methylation (TiO <sub>2</sub> -NP/Vehicle) | Sham group                     |                    |                    | TiO <sub>2</sub> -H group      |                    |                    |
|----------------|---------------------------------------------------|---------------------|------------|------------------------|--------------------------------------------------------------|--------------------------------|--------------------|--------------------|--------------------------------|--------------------|--------------------|
|                |                                                   |                     |            |                        |                                                              | Relative methylation (Cy5/Cy3) | Cy3 signal (Input) | Cy5 signal (MeDIP) | Relative methylation (Cy5/Cy3) | Cy3 signal (Input) | Cy5 signal (MeDIP) |
| A_68_P30478193 | chr15:98924227-98924271                           | NM_176835:-5666     | Dnaja22    | DIVERGENT_PROMOTER     | 0.26                                                         | 14.367                         | 5607.89            | 80570.22           | 3.743                          | 5092.45            | 19058.76           |
| A_68_P22954051 | chr4:59016462-59016506                            | NM_001033165:420    | Dnaja25    | INSIDE                 | 0.575                                                        | 0.417                          | 1082.29            | 451.58             | 0.24                           | 870.88             | 208.79             |
| A_68_P28198624 | chr12:4082843-4082887                             | NM_153082:291       | Dnaja27    | INSIDE                 | 0.462                                                        | 0.139                          | 6389.61            | 890.76             | 0.064                          | 4254.90            | 273.87             |
| A_68_P28198625 | chr12:4082923-4082967                             | NM_153082:371       | Dnaja27    | INSIDE                 | 0.602                                                        | 0.246                          | 2468.77            | 608.25             | 0.148                          | 1742.88            | 258.39             |
| A_68_P24114557 | chr5:135540470-135540514                          | NM_025362:417       | Dnaja30    | INSIDE                 | 0.535                                                        | 3.528                          | 2056.67            | 7255.39            | 1.889                          | 1733.73            | 3274.88            |
| A_68_P21911108 | chr2:181255242-181255287                          | NM_016775:55        | Dnaja5     | INSIDE                 | 0.581                                                        | 3.155                          | 1675.78            | 5287.68            | 1.832                          | 1401.14            | 2566.73            |
| A_68_P23155326 | chr4:101169630-101169674                          | NM_198412:400       | Dnaja6     | INSIDE                 | 0.641                                                        | 0.565                          | 2181.97            | 1232.96            | 0.362                          | 1629.31            | 590.61             |
| A_68_P29446595 | chr14:21207859-21207903                           | NM_134081:252       | Dnaja9     | INSIDE                 | 0.571                                                        | 0.275                          | 2077.12            | 572.02             | 0.157                          | 1491.82            | 234.62             |
| A_68_P28596399 | chr12:85455453-85455497                           | NM_028821:197       | Dnalcl1    | INSIDE                 | 0.033                                                        | 13.866                         | 1911.42            | 26504.15           | 0.451                          | 1640.56            | 739.58             |
| A_68_P20405120 | chr1:84692097-84692141                            | NM_152915:678       | Dner       | INSIDE                 | 0.641                                                        | 2.937                          | 1204.93            | 3538.73            | 1.884                          | 976.32             | 1839.23            |
| A_68_P20778066 | chr1:164408081-164408125                          | NM_001038619:59     | Dnm3       | INSIDE                 | 0.637                                                        | 3.284                          | 1051.87            | 3454.03            | 2.092                          | 903.45             | 1890.08            |
| A_68_P26344762 | chr9:20757074-20757118                            | NM_001199433:-29    | Dnmt1      | PROMOTER               | 0.429                                                        | 0.702                          | 1993.79            | 1400.52            | 0.301                          | 1427.76            | 430.21             |
| A_68_P21819501 | chr2:164571271-164571315                          | NM_133763:-222      | Dnttip1    | DIVERGENT_PROMOTER     | 0.497                                                        | 3.502                          | 6852.01            | 23993.92           | 1.742                          | 5440.97            | 9476.78            |
| A_68_P21819502 | chr2:164571363-164571407                          | NM_133763:-130      | Dnttip1    | DIVERGENT_PROMOTER     | 0.627                                                        | 0.522                          | 1533.02            | 799.94             | 0.327                          | 1194.18            | 390.83             |
| A_68_P27928203 | chr11:75608556-75608600                           | NM_007873:981       | Doc2b      | INSIDE                 | 0.237                                                        | 32.112                         | 383.77             | 12323.56           | 7.613                          | 369.88             | 2815.93            |
| A_68_P27928208 | chr11:75609122-75609166                           | NM_007873:415       | Doc2b      | INSIDE                 | 0.33                                                         | 1.724                          | 1452.03            | 2503.85            | 0.57                           | 1206.84            | 687.54             |
| A_68_P25547702 | chr7:141862476-141862520                          | NM_001033420:129    | Dock1      | INSIDE                 | 0.532                                                        | 3.303                          | 524.98             | 1734.18            | 1.756                          | 714.12             | 1254.34            |
| A_68_P20383167 | chr1:80754578-80754622                            | NM_175291:528       | Dock10     | INSIDE                 | 0.479                                                        | 0.366                          | 3570.56            | 1305.26            | 0.175                          | 2764.56            | 484.17             |
| A_68_P20383169 | chr1:80754785-80754829                            | NM_175291:322       | Dock10     | INSIDE                 | 0.635                                                        | 0.353                          | 1510.44            | 533.37             | 0.224                          | 1205.31            | 270.37             |
| A_68_P32315765 | chrX:33428989-33429033                            | NM_001009947:184    | Dock11     | INSIDE                 | 0.236                                                        | 18.324                         | 588.72             | 10787.83           | 4.316                          | 729.77             | 3149.80            |
| A_68_P32316566 | chrX:33565537-33565581                            | NM_001009947:136732 | Dock11     | INSIDE                 | 0.459                                                        | 8.094                          | 850.60             | 6884.36            | 3.716                          | 826.54             | 3071.20            |
| A_68_P32316569 | chrX:33565828-33565872                            | NM_001009947:137024 | Dock11     | INSIDE                 | 0.526                                                        | 3.351                          | 516.25             | 1729.77            | 1.762                          | 707.45             | 1246.26            |
| A_68_P26807068 | chr9:107095792-107095844                          | NM_153413:38422     | Dock3      | INSIDE                 | 0.352                                                        | 5.434                          | 507.40             | 2757.23            | 1.915                          | 445.80             | 853.56             |
| A_68_P28378468 | chr12:41173035-41173079                           | NM_172803:417       | Dock4      | INSIDE                 | 0.357                                                        | 0.530                          | 1076.55            | 570.66             | 0.189                          | 929.65             | 176.01             |
| A_68_P23142414 | chr4:98787172-98787216                            | NM_026082:412       | Dock7      | INSIDE                 | 0.59                                                         | 4.153                          | 834.47             | 3465.39            | 2.451                          | 771.28             | 1890.78            |
| A_68_P32027007 | chr19:25073867-25073911                           | NM_028785:-130      | Dock8      | PROMOTER               | 0.542                                                        | 6.927                          | 332.35             | 2302.08            | 3.753                          | 301.16             | 1130.38            |
| A_68_P24590984 | chr6:82983529-82983573                            | NM_010070:-85       | Dok1       | DIVERGENT_PROMOTER     | 0.593                                                        | 7.372                          | 1183.26            | 8723.34            | 4.371                          | 925.74             | 4046.44            |
| A_68_P24590979 | chr6:82982955-82982999                            | NM_010070:489       | Dok1       | INSIDE                 | 0.555                                                        | 0.717                          | 1800.35            | 1291.45            | 0.398                          | 1300.49            | 517.94             |
| A_68_P26080011 | chr8:97400151-97400195                            | NM_053246:40        | Dok4       | INSIDE                 | 0.545                                                        | 4.275                          | 975.30             | 4169.73            | 2.331                          | 787.85             | 1836.79            |
| A_68_P21102300 | chr2:30141879-30141923                            | NM_177648:-26       | Dolk       | DIVERGENT_PROMOTER     | 0.409                                                        | 4.771                          | 2649.77            | 12641.10           | 1.95                           | 2061.55            | 4020.85            |
| A_68_P21102918 | chr2:30248319-30248363                            | NM_020329:405       | Dolpp1     | INSIDE                 | 0.408                                                        | 10.216                         | 1927.09            | 19687.94           | 4.167                          | 1604.25            | 6684.18            |
| A_68_P21102914 | chr2:30247811-30247855                            | NM_020329:-103      | Dolpp1     | PROMOTER               | 0.621                                                        | 0.366                          | 4699.42            | 1717.82            | 0.227                          | 3180.84            | 722.04             |
| A_68_P31156013 | chr17:34974519-34974563                           | NM_001163770:-577   | Dom3z      | INSIDE                 | 0.334                                                        | 4.400                          | 3237.77            | 14247.30           | 1.472                          | 2585.03            | 3804.56            |
| A_68_P26699344 | chr9:86361211-86361255                            | NM_177208:472       | Dopey1     | INSIDE                 | 0.642                                                        | 5.307                          | 976.28             | 3228.41            | 2.124                          | 821.56             | 1745.33            |
| A_68_P27281161 | chr10:79594591-79594635                           | NM_001195268:5520   | Dos        | INSIDE                 | 0.395                                                        | 3.536                          | 2139.90            | 11847.02           | 2.187                          | 1703.36            | 3725.22            |
| A_68_P27281217 | chr10:79602092-79602136                           | NR_036582:-2        | Dos        | DIVERGENT_PROMOTER     | 0.562                                                        | 2.860                          | 1947.65            | 5569.42            | 1.608                          | 1668.53            | 2682.56            |
| A_68_P27285229 | chr10:80217921-80217965                           | NM_199322:-8        | Dot11      | PROMOTER               | 0.445                                                        | 6.892                          | 2508.33            | 17287.75           | 3.066                          | 2007.67            | 6155.52            |
| A_68_P27285230 | chr10:80218002-80218046                           | NM_199322:74        | Dot11      | INSIDE                 | 0.427                                                        | 3.953                          | 1226.89            | 4850.29            | 1.687                          | 1015.29            | 1712.33            |
| A_68_P26467020 | chr9:44135161-44135205                            | NM_007875:255       | Dpagt1     | INSIDE                 | 0.206                                                        | 0.610                          | 2871.95            | 1752.56            | 0.126                          | 1700.55            | 213.70             |
| A_68_P26467018 | chr9:44134953-44134997                            | NM_007875:47        | Dpagt1     | INSIDE                 | 0.343                                                        | 1.916                          | 1697.71            | 3253.43            | 0.657                          | 1401.80            | 921.22             |
| A_68_P26137127 | chr8:108502919-108502963                          | NM_027960:379       | Dpep3      | INSIDE                 | 0.255                                                        | 1.816                          | 2161.81            | 3926.54            | 0.464                          | 1619.13            | 750.58             |
| A_68_P26137129 | chr8:108503182-108503226                          | NM_027960:115       | Dpep3      | INSIDE                 | 0.278                                                        | 11.125                         | 6493.86            | 72245.71           | 3.093                          | 4188.51            | 12955.84           |
| A_68_P26137128 | chr8:108503069-108503114                          | NM_027960:228       | Dpep3      | INSIDE                 | 0.237                                                        | 8.878                          | 869.18             | 7716.98            | 2.105                          | 642.37             | 1352.27            |
| A_68_P25026497 | chr7:30093255-30093301                            | NM_013874:4255      | Dpf1       | INSIDE                 | 0.614                                                        | 0.644                          | 1195.12            | 769.71             | 0.395                          | 931.55             | 368.34             |
| A_68_P28593012 | chr12:84827504-84827548                           | NM_058212:1132      | Dpf3       | INSIDE                 | 0.647                                                        | 0.179                          | 5407.48            | 967.52             | 0.116                          | 3580.43            | 414.76             |
| A_68_P23237102 | chr4:117564195-117564239                          | NM_026344:392       | Dph2       | INSIDE                 | 0.229                                                        | 0.408                          | 5819.32            | 2371.87            | 0.093                          | 4218.79            | 393.88             |

| ProbeName      | Target position of probe on CpG island microarray | TargetID           | GeneSymbol | CpG island Description | Ratio of relative methylation (TiO <sub>2</sub> -NP/Vehicle) | Sham group                     |                    |                    | TiO <sub>2</sub> -H group      |                    |                    |
|----------------|---------------------------------------------------|--------------------|------------|------------------------|--------------------------------------------------------------|--------------------------------|--------------------|--------------------|--------------------------------|--------------------|--------------------|
|                |                                                   |                    |            |                        |                                                              | Relative methylation (Cy5/Cy3) | Cy3 signal (Input) | Cy5 signal (MeDIP) | Relative methylation (Cy5/Cy3) | Cy3 signal (Input) | Cy5 signal (MeDIP) |
| A_68_P23237103 | chr4:117564318-117564368                          | NM_026344:266      | Dph2       | INSIDE                 | 0.367                                                        | 0.733                          | 2939.28            | 2154.03            | 0.269                          | 1881.26            | 505.59             |
| A_68_P31925904 | chr19:4928163-4928207                             | NM_133803:103      | Dpp3       | INSIDE                 | 0.591                                                        | 0.634                          | 2854.44            | 1809.43            | 0.375                          | 1926.28            | 721.40             |
| A_68_P26585437 | chr9:64880753-64880797                            | NM_028906:510      | Dpp8       | INSIDE                 | 0.403                                                        | 0.215                          | 2856.42            | 613.70             | 0.086                          | 1985.83            | 171.74             |
| A_68_P26362426 | chr9:24307746-24307790                            | NM_172920:-184     | Dpy191I    | PROMOTER               | 0.638                                                        | 4.675                          | 232.69             | 1087.90            | 2.982                          | 196.65             | 586.43             |
| A_68_P25051002 | chr7:36539157-36539201                            | NM_178704:295      | Dpy1913    | INSIDE                 | 0.447                                                        | 0.509                          | 5151.65            | 2621.48            | 0.228                          | 4057.59            | 923.15             |
| A_68_P25051005 | chr7:36539482-36539526                            | NM_178704:-31      | Dpy1913    | PROMOTER               | 0.537                                                        | 0.345                          | 2771.84            | 956.61             | 0.185                          | 2169.64            | 402.29             |
| A_68_P25051003 | chr7:36539278-36539322                            | NM_178704:173      | Dpy1913    | INSIDE                 | 0.536                                                        | 3.416                          | 1149.53            | 3926.61            | 1.831                          | 894.95             | 1638.83            |
| A_68_P22729159 | chr4:11248834-11248879                            | NM_001081201:422   | Dpy1914    | INSIDE                 | 0.642                                                        | 0.489                          | 2895.40            | 1415.73            | 0.314                          | 2216.54            | 695.77             |
| A_68_P31350938 | chr17:74715809-74715853                           | NM_001146223:-57   | Dpy30      | PROMOTER               | 0.397                                                        | 9.108                          | 742.87             | 6766.43            | 3.616                          | 668.58             | 2417.42            |
| A_68_P31350937 | chr17:74715727-74715771                           | NM_001146222:-14   | Dpy30      | PROMOTER               | 0.183                                                        | 1.596                          | 688.31             | 1098.72            | 0.292                          | 666.70             | 194.73             |
| A_68_P29681787 | chr14:67486496-67486540                           | NM_009955:919      | Dpys12     | INSIDE                 | 0.505                                                        | 0.428                          | 1738.13            | 743.30             | 0.216                          | 1290.82            | 278.95             |
| A_68_P31661239 | chr18:43552742-43552786                           | NM_009468:221      | Dpys13     | INSIDE                 | 0.291                                                        | 1.841                          | 1045.63            | 1925.16            | 0.536                          | 899.31             | 482.42             |
| A_68_P23574101 | chr5:31013677-31013721                            | NM_023047:-569     | Dpys15     | PROMOTER               | 0.664                                                        | 4.037                          | 572.68             | 2311.69            | 2.68                           | 463.56             | 1242.56            |
| A_68_P31928602 | chr19:5424535-5424579                             | NM_024176:360      | Drap1      | INSIDE                 | 0.454                                                        | 7.032                          | 6106.47            | 42940.80           | 3.19                           | 5159.74            | 16457.16           |
| A_68_P31928601 | chr19:5424408-5424452                             | NM_024176:486      | Drap1      | INSIDE                 | 0.479                                                        | 0.527                          | 1770.09            | 933.39             | 0.252                          | 1236.88            | 312.17             |
| A_68_P25587953 | chr7:148479688-148479732                          | NM_007878:1806     | Drd4       | INSIDE                 | 0.415                                                        | 0.273                          | 2739.67            | 748.29             | 0.113                          | 1787.88            | 202.52             |
| A_68_P25587940 | chr7:148478056-148478100                          | NM_007878:174      | Drd4       | INSIDE                 | 0.61                                                         | 0.224                          | 4292.84            | 962.27             | 0.137                          | 2837.40            | 388.21             |
| A_68_P27551031 | chr11:3166132-3166176                             | NM_007879:235      | Drg1       | INSIDE                 | 0.229                                                        | 2.516                          | 8542.66            | 21496.64           | 0.577                          | 5917.33            | 3415.16            |
| A_68_P26473565 | chr9:45238529-45238573                            | NM_001081270:175   | Dscaml1    | INSIDE                 | 0.437                                                        | 0.689                          | 1524.89            | 1050.94            | 0.301                          | 901.62             | 271.83             |
| A_68_P30981932 | chr16:94747888-94747932                           | NM_007834:326      | Dscr3      | INSIDE                 | 0.665                                                        | 0.506                          | 3973.27            | 2008.56            | 0.336                          | 2831.37            | 952.28             |
| A_68_P21774638 | chr2:156832712-156832756                          | NM_025853:77       | Dsn1       | INSIDE                 | 0.519                                                        | 0.572                          | 2261.46            | 1292.49            | 0.296                          | 1720.00            | 509.82             |
| A_68_P28958812 | chr13:38243505-38243549                           | NM_023842:364      | Dsp        | INSIDE                 | 0.556                                                        | 3.539                          | 650.74             | 2302.74            | 1.969                          | 605.05             | 1191.37            |
| A_68_P21704233 | chr2:143740849-143740894                          | NM_019771:-195     | Dstn       | PROMOTER               | 0.514                                                        | 6.233                          | 3563.67            | 22213.22           | 3.207                          | 3002.60            | 9629.19            |
| A_68_P21704238 | chr2:143741481-143741525                          | NM_019771:436      | Dstn       | INSIDE                 | 0.531                                                        | 3.865                          | 1081.15            | 4178.71            | 2.051                          | 1004.34            | 2059.98            |
| A_68_P20621314 | chr1:134314077-134314121                          | NM_172516:69       | Dstyk      | INSIDE                 | 0.37                                                         | 19.833                         | 700.81             | 13899.32           | 7.342                          | 691.20             | 5074.80            |
| A_68_P20621319 | chr1:134314633-134314681                          | NM_172516:627      | Dstyk      | INSIDE                 | 0.51                                                         | 0.179                          | 2570.23            | 459.08             | 0.091                          | 1898.50            | 173.01             |
| A_68_P21708094 | chr2:144425869-144425913                          | NM_025314:202      | Dtd1       | INSIDE                 | 0.243                                                        | 8.863                          | 2210.45            | 19590.95           | 2.153                          | 1986.50            | 4277.02            |
| A_68_P28195719 | chr12:3572230-3572274                             | NM_001162465:-138  | Dtnb       | PROMOTER               | 0.661                                                        | 3.739                          | 1110.87            | 4153.84            | 2.473                          | 948.99             | 2346.87            |
| A_68_P28999556 | chr13:45097278-45097322                           | NM_025772:165      | Dtnbp1     | INSIDE                 | 0.178                                                        | 1.731                          | 990.83             | 1715.12            | 0.308                          | 848.28             | 261.67             |
| A_68_P31694513 | chr18:49915007-49915051                           | NM_001170960:227   | Dtwd2      | INSIDE                 | 0.221                                                        | 16.309                         | 2202.36            | 35919.34           | 3.608                          | 1820.78            | 6569.51            |
| A_68_P24040306 | chr5:121144444-121144488                          | NM_008052:17212    | Dtx1       | INSIDE                 | 0.284                                                        | 0.579                          | 1387.80            | 802.87             | 0.164                          | 1044.47            | 171.49             |
| A_68_P24040430 | chr5:121161722-121161766                          | NM_008052:-66      | Dtx1       | PROMOTER               | 0.593                                                        | 2.814                          | 2844.45            | 8005.30            | 1.669                          | 2237.80            | 3736.01            |
| A_68_P31961135 | chr19:12575854-12575898                           | NM_172442:610      | Dtx4       | INSIDE                 | 0.665                                                        | 2.427                          | 1302.43            | 3161.39            | 1.613                          | 1105.36            | 1783.00            |
| A_68_P20457519 | chr1:95698419-95698463                            | NM_001105667:71    | Dtymk      | INSIDE                 | 0.528                                                        | 0.255                          | 1970.84            | 503.39             | 0.135                          | 1568.39            | 211.40             |
| A_68_P20457518 | chr1:95698322-95698366                            | NM_001105667:167   | Dtymk      | INSIDE                 | 0.616                                                        | 0.673                          | 1805.00            | 1214.25            | 0.415                          | 1504.20            | 623.67             |
| A_68_P21585601 | chr2:122127327-122127371                          | NM_025777:2713     | Duoxa2     | INSIDE                 | 0.623                                                        | 0.416                          | 4013.85            | 1671.38            | 0.259                          | 2744.06            | 711.44             |
| A_68_P29454311 | chr14:22506206-22506253                           | NM_001013826:27569 | Dupd1      | INSIDE                 | 0.447                                                        | 4.822                          | 437.00             | 2107.24            | 2.157                          | 467.42             | 1008.26            |
| A_68_P31258228 | chr17:56904354-56904398                           | NM_144858:203      | Dus31      | INSIDE                 | 0.294                                                        | 0.415                          | 1966.70            | 815.74             | 0.122                          | 1422.43            | 173.46             |
| A_68_P31110713 | chr17:26645297-26645341                           | NM_013642:99       | Dusp1      | INSIDE                 | 0.517                                                        | 0.124                          | 4256.78            | 529.14             | 0.064                          | 2625.45            | 168.81             |
| A_68_P24607367 | chr6:85911667-85911711                            | NM_028099:-27      | Dusp11     | PROMOTER               | 0.364                                                        | 7.044                          | 1399.11            | 9855.28            | 2.562                          | 1234.87            | 3163.48            |
| A_68_P24607366 | chr6:85911499-85911543                            | NM_028099:141      | Dusp11     | INSIDE                 | 0.452                                                        | 0.507                          | 910.37             | 461.44             | 0.229                          | 754.60             | 173.01             |
| A_68_P20825163 | chr1:172815285-172815329                          | NM_023173:365      | Dusp12     | INSIDE                 | 0.663                                                        | 0.560                          | 1448.89            | 811.35             | 0.371                          | 1216.87            | 452.00             |
| A_68_P21752056 | chr2:152768692-152768736                          | NM_001159376:8604  | Dusp15     | INSIDE                 | 0.517                                                        | 0.457                          | 979.91             | 448.21             | 0.237                          | 721.50             | 170.68             |
| A_68_P21612764 | chr2:127162058-127162102                          | NM_010090:186      | Dusp2      | INSIDE                 | 0.533                                                        | 4.894                          | 1626.05            | 7958.25            | 2.611                          | 1485.39            | 3878.29            |
| A_68_P20834309 | chr1:174562662-174562706                          | NM_026725:421      | Dusp23     | INSIDE                 | 0.384                                                        | 10.573                         | 15277.02           | 161528.10          | 4.058                          | 13869.07           | 56280.77           |
| A_68_P25776099 | chr8:35872603-35872647                            | NM_176933:1961     | Dusp4      | INSIDE                 | 0.26                                                         | 7.488                          | 746.27             | 5587.92            | 1.945                          | 570.98             | 1110.78            |

| ProbeName      | Target position of probe on CpG island microarray | TargetID            | GeneSymbol    | CpG island Description | Ratio of relative methylation (TiO <sub>2</sub> -NP/Vehicle) | Sham group                     |                    |                    | TiO <sub>2</sub> -H group      |                    |                    |
|----------------|---------------------------------------------------|---------------------|---------------|------------------------|--------------------------------------------------------------|--------------------------------|--------------------|--------------------|--------------------------------|--------------------|--------------------|
|                |                                                   |                     |               |                        |                                                              | Relative methylation (Cy5/Cy3) | Cy3 signal (Input) | Cy5 signal (MeDIP) | Relative methylation (Cy5/Cy3) | Cy3 signal (Input) | Cy5 signal (MeDIP) |
| A_68_P27386026 | chr10:98725041-98725087                           | NM_026268:-800      | Dusp6         | PROMOTER               | 0.369                                                        | 0.665                          | 818.77             | 544.63             | 0.246                          | 692.63             | 170.05             |
| A_68_P26802905 | chr9:106270040-106270084                          | NM_153459:-900      | Dusp7         | PROMOTER               | 0.457                                                        | 13.059                         | 6602.50            | 86221.55           | 5.971                          | 6705.15            | 40037.82           |
| A_68_P25592946 | chr7:149281230-149281274                          | NM_008748:-63       | Dusp8         | PROMOTER               | 0.478                                                        | 0.710                          | 2261.27            | 1604.42            | 0.339                          | 1587.62            | 538.86             |
| A_68_P25592938 | chr7:149280400-149280444                          | NM_008748:767       | Dusp8         | INSIDE                 | 0.305                                                        | 6.726                          | 792.34             | 5329.17            | 2.05                           | 622.43             | 1275.70            |
| A_68_P25592835 | chr7:149268541-149268585                          | NM_008748:12627     | Dusp8         | INSIDE                 | 0.645                                                        | 2.990                          | 759.02             | 2269.26            | 1.927                          | 544.80             | 1049.88            |
| A_68_P23440963 | chr4:155222080-155222124                          | NM_010091:582       | Dvl1          | INSIDE                 | 0.665                                                        | 2.711                          | 758.14             | 2055.41            | 1.803                          | 678.26             | 1223.21            |
| A_68_P30588038 | chr16:20531403-20531447                           | NM_007889:14288     | Dvl3          | INSIDE                 | 0.098                                                        | 20.831                         | 5802.22            | 120867.10          | 2.04                           | 5084.57            | 10372.67           |
| A_68_P31834477 | chr18:75178883-75178927                           | NM_027727:479       | Dym           | INSIDE                 | 0.573                                                        | 6.432                          | 1505.18            | 9681.12            | 3.684                          | 1262.35            | 4650.03            |
| A_68_P28739206 | chr12:111839872-111839916                         | NM_030238:290       | Dync1h1       | INSIDE                 | 0.57                                                         | 5.851                          | 1179.41            | 6901.11            | 3.338                          | 1049.09            | 3501.45            |
| A_68_P24213704 | chr6:5955887-5955931                              | NM_001191023:280270 | Dync1i1       | INSIDE                 | 0.523                                                        | 3.995                          | 1327.07            | 5301.65            | 2.088                          | 1330.86            | 2778.28            |
| A_68_P26128587 | chr8:106966661-106966705                          | NM_001013380:265    | Dync1i2       | INSIDE                 | 0.581                                                        | 4.815                          | 3468.32            | 16700.52           | 2.799                          | 2869.92            | 8033.58            |
| A_68_P24008929 | chr5:115751222-115751266                          | NM_019682:-245      | Dynll1        | PROMOTER               | 0.299                                                        | 12.262                         | 2422.69            | 29707.45           | 3.664                          | 2139.11            | 7837.32            |
| A_68_P27997247 | chr11:87800951-87800995                           | NM_001168472:-885   | Dynll2        | PROMOTER               | 0.445                                                        | 4.861                          | 1949.26            | 9475.56            | 2.163                          | 1602.52            | 3466.15            |
| A_68_P27997248 | chr11:87801126-87801170                           | NM_026556:-113      | Dynll2        | PROMOTER               | 0.094                                                        | 5.585                          | 2031.77            | 11347.32           | 0.527                          | 1437.17            | 756.86             |
| A_68_P25020569 | chr7:28964516-28964561                            | NM_010092:26        | Dyrk1b        | INSIDE                 | 0.065                                                        | 3.147                          | 1025.61            | 3227.71            | 0.204                          | 823.60             | 168.06             |
| A_68_P25020574 | chr7:28965243-28965287                            | NM_010092:752       | Dyrk1b        | INSIDE                 | 0.434                                                        | 7.385                          | 2802.97            | 20700.36           | 3.206                          | 2345.49            | 7519.89            |
| A_68_P20613763 | chr1:133026416-133026460                          | NM_145508:8373      | Dyrk3         | INSIDE                 | 0.39                                                         | 7.982                          | 1320.71            | 10541.57           | 3.116                          | 923.70             | 2878.32            |
| A_68_P26765226 | chr9:99530146-99530190                            | NM_028258:155       | Dzip11        | INSIDE                 | 0.252                                                        | 1.647                          | 945.08             | 1556.12            | 0.415                          | 765.78             | 317.56             |
| A_68_P30743456 | chr16:48994162-48994206                           | NM_001110017:41     | Dzip3         | INSIDE                 | 0.325                                                        | 7.350                          | 2933.66            | 21562.66           | 2.387                          | 2660.28            | 6349.02            |
| A_68_P30743455 | chr16:48994040-48994084                           | NM_001110017:163    | Dzip3         | INSIDE                 | 0.499                                                        | 0.739                          | 2363.02            | 1745.77            | 0.369                          | 1904.91            | 702.33             |
| A_68_P28051732 | chr11:97489553-97489597                           | NM_175332:1456      | E130012A19Rik | INSIDE                 | 0.274                                                        | 40.898                         | 3942.88            | 161257.60          | 11.186                         | 5389.68            | 60290.04           |
| A_68_P26135515 | chr8:108231965-108232009                          | NM_198299:82        | E130303B06Rik | INSIDE                 | 0.426                                                        | 4.649                          | 5816.72            | 27042.27           | 1.981                          | 4452.55            | 8820.22            |
| A_68_P27080339 | chr10:39451377-39451421                           | NR_038037:415       | E130307A14Rik | INSIDE                 | 0.405                                                        | 4.840                          | 3442.55            | 16661.05           | 1.962                          | 3121.68            | 6123.49            |
| A_68_P22957376 | chr4:59638970-59639014                            | NM_153158:-100      | E130308A19Rik | PROMOTER               | 0.572                                                        | 3.355                          | 1274.23            | 4275.33            | 1.92                           | 1214.20            | 2331.63            |
| A_68_P27921611 | chr11:74451961-74452005                           | NM_001013784:18876  | E130309D14Rik | INSIDE                 | 0.163                                                        | 28.020                         | 3433.46            | 96207.16           | 4.576                          | 2764.15            | 12647.78           |
| A_68_P27921508 | chr11:74433189-74433233                           | NM_001013784:104    | E130309D14Rik | INSIDE                 | 0.229                                                        | 10.430                         | 3784.22            | 39471.16           | 2.385                          | 3419.13            | 8154.43            |
| A_68_P27921507 | chr11:74433104-74433148                           | NM_001013784:20     | E130309D14Rik | INSIDE                 | 0.579                                                        | 0.359                          | 2374.87            | 853.55             | 0.208                          | 1834.45            | 382.00             |
| A_68_P27921510 | chr11:74433466-74433510                           | NM_001013784:382    | E130309D14Rik | INSIDE                 | 0.644                                                        | 14.844                         | 2517.81            | 37374.31           | 9.561                          | 2197.74            | 21012.85           |
| A_68_P27921506 | chr11:74432896-74432940                           | NM_001013784:-188   | E130309D14Rik | PROMOTER               | 0.56                                                         | 2.550                          | 1701.80            | 4339.18            | 1.428                          | 1520.17            | 2170.44            |
| A_68_P22903295 | chr4:49072454-49072498                            | NM_178756:143       | E130309F12Rik | INSIDE                 | 0.482                                                        | 0.424                          | 1082.84            | 459.25             | 0.205                          | 855.05             | 174.96             |
| A_68_P22903296 | chr4:49072520-49072564                            | NM_178756:209       | E130309F12Rik | INSIDE                 | 0.535                                                        | 3.163                          | 2425.52            | 7672.68            | 1.694                          | 1901.37            | 3220.44            |
| A_68_P22194169 | chr3:63733044-63733088                            | NM_177856:241       | E130311K13Rik | INSIDE                 | 0.368                                                        | 0.667                          | 887.46             | 591.86             | 0.245                          | 753.91             | 185.02             |
| A_68_P22194043 | chr3:63709285-63709329                            | NM_177856:24001     | E130311K13Rik | DOWNSTREAM             | 0.51                                                         | 3.458                          | 805.63             | 2786.11            | 1.763                          | 793.54             | 1398.63            |
| A_68_P27279294 | chr10:79318023-79318067                           | NR_029447:-328      | E130317F20Rik | PROMOTER               | 0.163                                                        | 34.900                         | 1553.94            | 54232.57           | 5.704                          | 1341.34            | 7651.26            |
| A_68_P28914784 | chr13:30077124-30077168                           | NM_010093:786       | E2F3          | INSIDE                 | 0.263                                                        | 9.354                          | 1229.21            | 11497.89           | 2.46                           | 965.82             | 2375.69            |
| A_68_P28914786 | chr13:30077338-30077382                           | NM_010093:572       | E2F3          | INSIDE                 | 0.43                                                         | 0.225                          | 3140.30            | 708.04             | 0.097                          | 2361.54            | 228.88             |
| A_68_P28914790 | chr13:30077733-30077777                           | NM_010093:178       | E2F3          | INSIDE                 | 0.664                                                        | 0.726                          | 2990.03            | 2170.27            | 0.482                          | 2327.55            | 1122.10            |
| A_68_P28914780 | chr13:30076726-30076770                           | NM_010093:1184      | E2F3          | INSIDE                 | 0.622                                                        | 0.564                          | 855.68             | 482.30             | 0.35                           | 674.32             | 236.33             |
| A_68_P28266976 | chr12:16818150-16818194                           | NM_033270:402       | E2F6          | INSIDE                 | 0.453                                                        | 0.244                          | 2539.10            | 620.28             | 0.111                          | 1991.19            | 220.50             |
| A_68_P28266974 | chr12:16817834-16817878                           | NM_033270:86        | E2F6          | INSIDE                 | 0.48                                                         | 6.153                          | 1480.99            | 9112.01            | 2.953                          | 1270.58            | 3752.49            |
| A_68_P27445213 | chr10:110182319-110182363                         | NM_178609:-180      | E2F7          | PROMOTER               | 0.13                                                         | 22.417                         | 979.95             | 21967.84           | 2.905                          | 796.01             | 2312.34            |
| A_68_P27445215 | chr10:110182553-110182597                         | NM_178609:54        | E2F7          | INSIDE                 | 0.519                                                        | 0.288                          | 1571.99            | 452.57             | 0.149                          | 1123.51            | 167.91             |
| A_68_P25108786 | chr7:56137106-56137150                            | NM_001013368:-717   | E2F8          | PROMOTER               | 0.353                                                        | 9.692                          | 2961.86            | 28705.55           | 3.422                          | 2564.28            | 8776.02            |
| A_68_P24388784 | chr6:40385730-40385774                            | NM_175528:380       | E330009J07Rik | INSIDE                 | 0.444                                                        | 15.276                         | 5431.10            | 82967.24           | 6.785                          | 4073.31            | 27636.83           |
| A_68_P30253796 | chr15:59205558-59205602                           | NM_153548:127       | E430025E21Rik | INSIDE                 | 0.337                                                        | 18.021                         | 2963.70            | 53409.95           | 6.071                          | 3611.32            | 21925.66           |
| A_68_P31097445 | chr17:24592379-24592423                           | NM_007893:-144      | E4F1          | PROMOTER               | 0.484                                                        | 0.160                          | 3007.77            | 481.06             | 0.077                          | 2171.91            | 168.28             |



| ProbeName      | Target position of probe on CpG island microarray | TargetID            | GeneSymbol | CpG island Description | Ratio of relative methylation (TiO <sub>2</sub> -NP/Vehicle) | Sham group                     |                    |                    | TiO <sub>2</sub> -H group      |                    |                    |
|----------------|---------------------------------------------------|---------------------|------------|------------------------|--------------------------------------------------------------|--------------------------------|--------------------|--------------------|--------------------------------|--------------------|--------------------|
|                |                                                   |                     |            |                        |                                                              | Relative methylation (Cy5/Cy3) | Cy3 signal (Input) | Cy5 signal (MeDIP) | Relative methylation (Cy5/Cy3) | Cy3 signal (Input) | Cy5 signal (MeDIP) |
| A_68_P31097441 | chr17:24591842-24591886                           | NM_007893:392       | E4f1       | INSIDE                 | 0.666                                                        | 0.506                          | 871.83             | 441.17             | 0.337                          | 699.72             | 235.70             |
| A_68_P30677693 | chr16:36875711-36875755                           | NM_134111:-820      | Eaf2       | DIVERGENT_PROMOTER     | 0.491                                                        | 0.578                          | 842.77             | 486.75             | 0.283                          | 768.84             | 217.84             |
| A_68_P28449065 | chr12:55796514-55796558                           | NM_025456:316       | Eapp       | INSIDE                 | 0.351                                                        | 1.489                          | 1388.06            | 2066.84            | 0.522                          | 1114.33            | 582.18             |
| A_68_P27756960 | chr11:44434061-44434105                           | NM_007897:2447      | Ebf1       | INSIDE                 | 0.355                                                        | 0.441                          | 1492.34            | 657.59             | 0.156                          | 1146.11            | 179.17             |
| A_68_P29683667 | chr14:67850834-67850879                           | NM_010095:-1272     | Ebf2       | PROMOTER               | 0.351                                                        | 21.247                         | 266.20             | 5655.93            | 7.468                          | 253.76             | 1895.06            |
| A_68_P25564249 | chr7:144390277-144390323                          | NM_001113414:115828 | Ebf3       | INSIDE                 | 0.174                                                        | 21.337                         | 2387.99            | 50952.21           | 3.717                          | 1555.72            | 5782.73            |
| A_68_P25565202 | chr7:144505325-144505370                          | NM_001113414:781    | Ebf3       | INSIDE                 | 0.295                                                        | 20.549                         | 4019.96            | 82604.76           | 6.066                          | 3820.65            | 23176.83           |
| A_68_P25564250 | chr7:144390350-144390394                          | NM_001113414:115756 | Ebf3       | INSIDE                 | 0.421                                                        | 5.434                          | 2363.38            | 12843.10           | 2.289                          | 1717.02            | 3929.41            |
| A_68_P25565208 | chr7:144505952-144505996                          | NM_001113414:154    | Ebf3       | INSIDE                 | 0.495                                                        | 4.850                          | 774.79             | 3757.56            | 2.402                          | 702.73             | 1688.28            |
| A_68_P25565281 | chr7:144514141-144514185                          | NM_001113414:-8034  | Ebf3       | PROMOTER               | 0.634                                                        | 0.564                          | 1993.40            | 1124.82            | 0.358                          | 1677.16            | 600.23             |
| A_68_P25564251 | chr7:144390467-144390511                          | NM_001113414:115640 | Ebf3       | INSIDE                 | 0.088                                                        | 19.292                         | 2478.23            | 47810.94           | 1.698                          | 1741.96            | 2958.28            |
| A_68_P21628998 | chr2:130120631-130120675                          | NM_001110513:-1022  | Ebf4       | PROMOTER               | 0.601                                                        | 0.737                          | 2576.62            | 1898.00            | 0.443                          | 1949.46            | 863.34             |
| A_68_P21629321 | chr2:130188203-130188247                          | NM_001110513:66550  | Ebf4       | INSIDE                 | 0.428                                                        | 0.740                          | 2270.76            | 1679.36            | 0.316                          | 1663.46            | 526.39             |
| A_68_P23342966 | chr4:137514008-137514052                          | NM_199307:95879     | Ece1       | INSIDE                 | 0.653                                                        | 2.677                          | 2940.99            | 7874.44            | 1.748                          | 2022.63            | 3535.19            |
| A_68_P30588586 | chr16:20630082-20630126                           | NM_139293:181       | Ece2       | INSIDE                 | 0.574                                                        | 4.454                          | 2037.90            | 9076.91            | 2.555                          | 1813.63            | 4634.20            |
| A_68_P25582340 | chr7:147302368-147302412                          | NM_053119:-68       | Echs1      | DIVERGENT_PROMOTER     | 0.522                                                        | 0.223                          | 4549.95            | 1014.31            | 0.116                          | 3149.68            | 366.59             |
| A_68_P22009690 | chr3:27052485-27052529                            | NM_001177625:270    | Ect2       | INSIDE                 | 0.395                                                        | 3.586                          | 5317.18            | 19067.98           | 1.418                          | 4064.00            | 5762.16            |
| A_68_P26543338 | chr9:57556763-57556807                            | NM_153799:409       | Ede3       | INSIDE                 | 0.449                                                        | 15.539                         | 3960.11            | 61536.92           | 6.974                          | 2926.51            | 20409.19           |
| A_68_P26543337 | chr9:57556573-57556620                            | NM_153799:221       | Ede3       | INSIDE                 | 0.661                                                        | 0.643                          | 2021.04            | 1299.56            | 0.425                          | 1478.24            | 628.77             |
| A_68_P26543336 | chr9:57556435-57556479                            | NM_153799:81        | Ede3       | INSIDE                 | 0.571                                                        | 0.685                          | 2606.91            | 1785.76            | 0.391                          | 2052.09            | 803.20             |
| A_68_P26136484 | chr8:108404850-108404894                          | NM_181594:22        | Ede4       | INSIDE                 | 0.519                                                        | 0.342                          | 3293.70            | 1125.21            | 0.177                          | 2225.20            | 394.87             |
| A_68_P24735989 | chr6:108778919-108778963                          | NM_138677:306       | Edem1      | INSIDE                 | 0.621                                                        | 7.337                          | 533.75             | 3915.99            | 4.555                          | 451.21             | 2055.29            |
| A_68_P20716449 | chr1:153602522-153602566                          | NM_001039644:41     | Edem3      | INSIDE                 | 0.567                                                        | 2.954                          | 1812.78            | 5355.08            | 1.676                          | 1486.38            | 2490.47            |
| A_68_P21877294 | chr2:174586233-174586277                          | NM_007903:-19       | Edn3       | PROMOTER               | 0.138                                                        | 25.665                         | 1138.40            | 29216.91           | 3.542                          | 951.93             | 3371.74            |
| A_68_P25310578 | chr7:97128916-97128960                            | NM_021876:548       | Eed        | INSIDE                 | 0.368                                                        | 0.307                          | 5086.20            | 1562.78            | 0.113                          | 3195.11            | 361.75             |
| A_68_P28962023 | chr13:38751002-38751046                           | NM_025380:-127      | Eef1e1     | PROMOTER               | 0.462                                                        | 5.075                          | 4001.95            | 20310.04           | 2.347                          | 3156.14            | 7406.67            |
| A_68_P25470625 | chr7:127986822-127986866                          | NM_007908:448       | Eef2k      | INSIDE                 | 0.36                                                         | 6.377                          | 1151.41            | 7342.53            | 2.298                          | 976.40             | 2243.90            |
| A_68_P20863709 | chr1:180336540-180336584                          | NM_026626:551       | Efcab2     | INSIDE                 | 0.486                                                        | 0.135                          | 4102.98            | 552.80             | 0.065                          | 2969.71            | 194.43             |
| A_68_P20863707 | chr1:180336323-180336367                          | NM_026626:333       | Efcab2     | INSIDE                 | 0.575                                                        | 0.694                          | 1167.18            | 810.30             | 0.399                          | 972.58             | 388.06             |
| A_68_P25588978 | chr7:148647831-148647875                          | NM_001025103:860    | Efcab4a    | INSIDE                 | 0.351                                                        | 0.658                          | 1350.40            | 888.46             | 0.231                          | 1103.03            | 254.42             |
| A_68_P21756890 | chr2:153604913-153604957                          | NR_036629:-1680     | Efcab8     | PROMOTER               | 0.53                                                         | 0.522                          | 1498.42            | 782.75             | 0.277                          | 1195.55            | 330.97             |
| A_68_P29631109 | chr14:58617905-58617949                           | NM_028643:173       | Efha1      | INSIDE                 | 0.385                                                        | 6.051                          | 797.18             | 4823.98            | 2.331                          | 765.20             | 1784.04            |
| A_68_P25804901 | chr8:41393403-41393447                            | NM_030110:20        | Efha2      | INSIDE                 | 0.602                                                        | 5.979                          | 546.66             | 3268.69            | 3.601                          | 547.98             | 1973.17            |
| A_68_P20075374 | chr1:20941893-20941937                            | NM_027974:208       | Efhe1      | INSIDE                 | 0.628                                                        | 0.376                          | 3072.26            | 1154.33            | 0.236                          | 2394.83            | 565.07             |
| A_68_P20416757 | chr1:89160862-89160906                            | NM_028889:-54       | Efhd1      | PROMOTER               | 0.07                                                         | 70.804                         | 33225.71           | 2352525.00         | 4.954                          | 88834.39           | 440091.60          |
| A_68_P23366442 | chr4:141430855-141430899                          | NM_025994:-41       | Efhd2      | PROMOTER               | 0.27                                                         | 14.192                         | 1252.71            | 17778.64           | 3.828                          | 1094.27            | 4188.37            |
| A_68_P23366440 | chr4:141430540-141430584                          | NM_025994:273       | Efhd2      | INSIDE                 | 0.582                                                        | 4.341                          | 1102.38            | 4784.97            | 2.524                          | 1020.16            | 2575.17            |
| A_68_P22318338 | chr3:89084974-89085018                            | NM_001162425:-123   | Efna1      | PROMOTER               | 0.335                                                        | 0.630                          | 938.16             | 590.58             | 0.211                          | 814.52             | 171.57             |
| A_68_P27281569 | chr10:79649352-79649396                           | NM_007909:7148      | Efna2      | INSIDE                 | 0.348                                                        | 1.537                          | 1339.60            | 2059.33            | 0.535                          | 1087.45            | 582.05             |
| A_68_P27281570 | chr10:79649434-79649479                           | NM_007909:7230      | Efna2      | INSIDE                 | 0.063                                                        | 11.606                         | 5431.24            | 63037.40           | 0.737                          | 3814.41            | 2810.60            |
| A_68_P22318564 | chr3:89125165-89125211                            | NM_010108:1613      | Efna3      | INSIDE                 | 0.63                                                         | 3.830                          | 364.94             | 1397.75            | 2.412                          | 291.88             | 703.94             |
| A_68_P22318693 | chr3:89141626-89141670                            | NM_007910:302       | Efna4      | INSIDE                 | 0.576                                                        | 3.254                          | 628.01             | 2043.52            | 1.874                          | 562.93             | 1054.93            |
| A_68_P31286852 | chr17:63231463-63231507                           | NM_010109:-818      | Efna5      | PROMOTER               | 0.565                                                        | 5.046                          | 2882.54            | 14546.12           | 2.851                          | 2041.94            | 5820.86            |
| A_68_P31286846 | chr17:63230685-63230729                           | NM_010109:-40       | Efna5      | PROMOTER               | 0.45                                                         | 0.751                          | 6935.04            | 5209.99            | 0.338                          | 4758.40            | 1609.23            |
| A_68_P25637623 | chr8:8661349-8661393                              | NM_010111:-597      | Efnb2      | PROMOTER               | 0.32                                                         | 6.742                          | 979.41             | 6603.47            | 2.156                          | 876.20             | 1889.19            |
| A_68_P25637627 | chr8:8661837-8661882                              | NM_010111:-1086     | Efnb2      | PROMOTER               | 0.53                                                         | 0.342                          | 1371.96            | 469.86             | 0.182                          | 947.69             | 172.13             |

| ProbeName      | Target position of probe on CpG island microarray | TargetID           | GeneSymbol | CpG island Description | Ratio of relative methylation (TiO <sub>2</sub> -NP/Vehicle) | Sham group                     |                    |                    | TiO <sub>2</sub> -H group      |                    |                    |
|----------------|---------------------------------------------------|--------------------|------------|------------------------|--------------------------------------------------------------|--------------------------------|--------------------|--------------------|--------------------------------|--------------------|--------------------|
|                |                                                   |                    |            |                        |                                                              | Relative methylation (Cy5/Cy3) | Cy3 signal (Input) | Cy5 signal (MeDIP) | Relative methylation (Cy5/Cy3) | Cy3 signal (Input) | Cy5 signal (MeDIP) |
| A_68_P27895787 | chr11:69373754-69373798                           | NM_007911:-37      | Efnb3      | PROMOTER               | 0.562                                                        | 0.172                          | 11727.39           | 2017.88            | 0.097                          | 7543.67            | 728.92             |
| A_68_P28198379 | chr12:4038471-4038515                             | NM_001082483:423   | Efr3b      | INSIDE                 | 0.255                                                        | 12.393                         | 3498.45            | 43355.13           | 3.156                          | 3243.67            | 10237.78           |
| A_68_P28198046 | chr12:3982083-3982127                             | NM_001082483:56811 | Efr3b      | INSIDE                 | 0.494                                                        | 4.403                          | 3336.94            | 14692.98           | 2.176                          | 2659.29            | 5787.26            |
| A_68_P29615096 | chr14:55545666-55545710                           | NM_010112:-63      | Efs        | DIVERGENT_PROMOTER     | 0.422                                                        | 49.495                         | 2662.56            | 131783.70          | 20.882                         | 2165.63            | 45222.08           |
| A_68_P29615089 | chr14:55545056-55545100                           | NM_010112:547      | Efs        | INSIDE                 | 0.62                                                         | 3.963                          | 4140.98            | 16412.57           | 2.456                          | 3196.81            | 7850.12            |
| A_68_P29615085 | chr14:55544633-55544677                           | NM_010112:971      | Efs        | INSIDE                 | 0.503                                                        | 0.504                          | 854.19             | 430.19             | 0.253                          | 663.11             | 168.03             |
| A_68_P22019968 | chr3:28981553-28981597                            | NM_001167748:-76   | Egfm1      | INSIDE                 | 0.547                                                        | 4.852                          | 732.43             | 3554.01            | 2.657                          | 643.51             | 1709.52            |
| A_68_P22019967 | chr3:28981485-28981529                            | NM_001167748:8     | Egfm1      | INSIDE                 | 0.402                                                        | 5.238                          | 353.72             | 1852.80            | 2.106                          | 397.52             | 836.99             |
| A_68_P26248668 | chr8:127473510-127473554                          | NM_053207:-378     | Egln1      | PROMOTER               | 0.664                                                        | 4.371                          | 661.86             | 2893.01            | 2.9                            | 537.13             | 1557.90            |
| A_68_P31615126 | chr18:35020689-35020733                           | NM_007913:-150     | Egr1       | PROMOTER               | 0.378                                                        | 0.568                          | 990.51             | 562.40             | 0.214                          | 816.92             | 175.14             |
| A_68_P27212423 | chr10:66998199-66998243                           | NM_010118:-2396    | Egr2       | PROMOTER               | 0.413                                                        | 4.107                          | 3019.86            | 12403.14           | 1.696                          | 2438.29            | 4135.25            |
| A_68_P29699021 | chr14:70477881-70477925                           | NM_018781:651      | Egr3       | INSIDE                 | 0.217                                                        | 0.543                          | 3160.00            | 1717.26            | 0.118                          | 2181.42            | 257.22             |
| A_68_P29699040 | chr14:70480133-70480177                           | NM_018781:2903     | Egr3       | DOWNSTREAM             | 0.218                                                        | 28.718                         | 3036.85            | 87212.91           | 6.262                          | 2696.36            | 16884.80           |
| A_68_P29699033 | chr14:70479382-70479426                           | NM_018781:2153     | Egr3       | INSIDE                 | 0.441                                                        | 0.228                          | 2303.41            | 524.62             | 0.101                          | 1703.99            | 171.32             |
| A_68_P29699027 | chr14:70478576-70478620                           | NM_018781:1347     | Egr3       | INSIDE                 | 0.611                                                        | 4.016                          | 2707.17            | 10872.53           | 2.452                          | 2145.40            | 5260.73            |
| A_68_P29698999 | chr14:70474927-70474971                           | NM_018781:-2303    | Egr3       | PROMOTER               | 0.285                                                        | 6.138                          | 794.51             | 4876.83            | 1.749                          | 727.45             | 1271.98            |
| A_68_P27640630 | chr11:22186736-22186780                           | NM_153078:-917     | Ehbp1      | PROMOTER               | 0.625                                                        | 3.768                          | 1578.63            | 5947.50            | 2.354                          | 1396.45            | 3287.43            |
| A_68_P31933638 | chr19:6277193-6277237                             | NM_010119:319      | Ehd1       | INSIDE                 | 0.296                                                        | 0.331                          | 4989.95            | 1653.94            | 0.098                          | 3522.46            | 345.49             |
| A_68_P31933641 | chr19:6277445-6277489                             | NM_010119:571      | Ehd1       | INSIDE                 | 0.351                                                        | 6.389                          | 2532.70            | 16181.42           | 2.245                          | 2206.54            | 4953.99            |
| A_68_P31933640 | chr19:6277337-6277381                             | NM_010119:463      | Ehd1       | INSIDE                 | 0.627                                                        | 0.523                          | 2016.75            | 1054.88            | 0.328                          | 1523.82            | 499.82             |
| A_68_P21573668 | chr2:119980528-119980572                          | NM_133838:-239     | Ehd4       | PROMOTER               | 0.518                                                        | 0.212                          | 2233.09            | 472.40             | 0.11                           | 1571.57            | 172.19             |
| A_68_P21573666 | chr2:119980254-119980299                          | NM_133838:35       | Ehd4       | INSIDE                 | 0.627                                                        | 0.395                          | 10069.02           | 3976.76            | 0.248                          | 6504.30            | 1610.84            |
| A_68_P31156414 | chr17:35042317-35042361                           | NM_145830:6420     | Ehmt2      | INSIDE                 | 0.421                                                        | 7.146                          | 1391.15            | 9941.16            | 3.008                          | 935.62             | 2814.57            |
| A_68_P28067423 | chr11:100181873-100181917                         | NM_011508:585      | Eif1       | INSIDE                 | 0.587                                                        | 4.952                          | 682.43             | 3379.33            | 2.907                          | 595.24             | 1730.14            |
| A_68_P28067422 | chr11:100181743-100181787                         | NM_011508:455      | Eif1       | INSIDE                 | 0.639                                                        | 0.311                          | 1870.18            | 581.86             | 0.199                          | 1481.16            | 294.53             |
| A_68_P31677781 | chr18:46757255-46757299                           | NM_010120:-81      | Eif1a      | DIVERGENT_PROMOTER     | 0.549                                                        | 0.397                          | 4289.70            | 1703.57            | 0.218                          | 3382.56            | 737.72             |
| A_68_P26878190 | chr9:120401831-120401875                          | NM_026892:129      | Eif1b      | INSIDE                 | 0.483                                                        | 0.428                          | 2341.74            | 1001.92            | 0.207                          | 1658.98            | 342.89             |
| A_68_P26878194 | chr9:120402272-120402316                          | NM_026892:571      | Eif1b      | INSIDE                 | 0.579                                                        | 0.580                          | 944.12             | 547.40             | 0.336                          | 807.30             | 271.01             |
| A_68_P23232037 | chr4:116692073-116692117                          | NM_175135:82       | Eif2b3     | INSIDE                 | 0.611                                                        | 3.455                          | 1324.62            | 4577.04            | 2.11                           | 1178.25            | 2486.07            |
| A_68_P23280649 | chr4:126210358-126210402                          | NM_153177:322      | Eif2c4     | INSIDE                 | 0.309                                                        | 7.068                          | 1603.91            | 11336.43           | 2.186                          | 1607.89            | 3514.33            |
| A_68_P21762932 | chr2:154718551-154718596                          | NM_026030:69       | Eif2s2     | INSIDE                 | 0.286                                                        | 10.338                         | 2683.09            | 27738.43           | 2.956                          | 2161.98            | 6390.25            |
| A_68_P21762929 | chr2:154718235-154718279                          | NM_026030:386      | Eif2s2     | INSIDE                 | 0.325                                                        | 0.677                          | 1090.01            | 738.04             | 0.22                           | 843.90             | 185.47             |
| A_68_P25501141 | chr7:133709739-133709783                          | NM_146200:120      | Eif3c      | INSIDE                 | 0.63                                                         | 0.491                          | 3445.34            | 1689.94            | 0.309                          | 2674.03            | 826.07             |
| A_68_P25405197 | chr7:116094538-116094582                          | NM_025344:16632    | Eif3f      | DOWNSTREAM             | 0.269                                                        | 6.889                          | 1731.30            | 11926.63           | 1.855                          | 1574.20            | 2919.92            |
| A_68_P26344425 | chr9:20702979-20703023                            | NM_016876:34       | Eif3g      | INSIDE                 | 0.308                                                        | 0.271                          | 2893.80            | 783.64             | 0.084                          | 2097.59            | 175.17             |
| A_68_P30213289 | chr15:51697145-51697189                           | NM_080635:-159     | Eif3h      | PROMOTER               | 0.374                                                        | 7.055                          | 640.97             | 4521.97            | 2.64                           | 580.33             | 1531.88            |
| A_68_P27896437 | chr11:69484692-69484736                           | NM_001159375:1211  | Eif4a1     | INSIDE                 | 0.514                                                        | 0.617                          | 1103.79            | 680.76             | 0.317                          | 851.53             | 270.20             |
| A_68_P22569291 | chr3:138190828-138190872                          | NM_007917:1696     | Eif4e      | INSIDE                 | 0.374                                                        | 0.369                          | 1359.77            | 501.66             | 0.138                          | 1242.93            | 171.67             |
| A_68_P22569284 | chr3:138189919-138189963                          | NM_007917:786      | Eif4e      | INSIDE                 | 0.461                                                        | 7.730                          | 1272.85            | 9839.55            | 3.563                          | 1045.88            | 3726.64            |
| A_68_P24687558 | chr6:99616754-99616798                            | NM_025829:-11      | Eif4e3     | PROMOTER               | 0.253                                                        | 1.740                          | 1243.58            | 2164.40            | 0.44                           | 1051.58            | 462.30             |
| A_68_P27180609 | chr10:60915255-60915299                           | NM_010124:141      | Eif4ebp2   | INSIDE                 | 0.647                                                        | 2.238                          | 1651.43            | 3696.51            | 1.448                          | 1424.98            | 2063.05            |
| A_68_P27550687 | chr11:3102424-3102468                             | NM_023743:-139     | Eif4enif1  | PROMOTER               | 0.48                                                         | 3.154                          | 1370.58            | 4322.26            | 1.513                          | 1163.20            | 1760.38            |
| A_68_P30588855 | chr16:20673605-20673650                           | NM_001005331:806   | Eif4g1     | INSIDE                 | 0.41                                                         | 0.266                          | 2025.71            | 539.60             | 0.109                          | 1532.74            | 167.45             |
| A_68_P25416987 | chr7:118226039-118226083                          | NM_001040131:484   | Eif4g2     | INSIDE                 | 0.459                                                        | 4.981                          | 1129.00            | 5623.55            | 2.284                          | 999.89             | 2284.17            |
| A_68_P23343151 | chr4:137549520-137549564                          | NM_172703:158      | Eif4g3     | INSIDE                 | 0.536                                                        | 0.650                          | 2604.57            | 1693.99            | 0.349                          | 1930.62            | 673.56             |
| A_68_P23343150 | chr4:137549405-137549449                          | NM_172703:42       | Eif4g3     | INSIDE                 | 0.534                                                        | 0.576                          | 946.81             | 545.25             | 0.308                          | 693.19             | 213.20             |

| ProbeName      | Target position of probe on CpG island microarray | TargetID          | GeneSymbol | CpG island Description | Ratio of relative methylation (TiO <sub>2</sub> -NP/Vehicle) | Sham group                     |                    |                    |                                | TiO <sub>2</sub> -H group |                    |  |
|----------------|---------------------------------------------------|-------------------|------------|------------------------|--------------------------------------------------------------|--------------------------------|--------------------|--------------------|--------------------------------|---------------------------|--------------------|--|
|                |                                                   |                   |            |                        |                                                              | Relative methylation (Cy5/Cy3) | Cy3 signal (Input) | Cy5 signal (MeDIP) | Relative methylation (Cy5/Cy3) | Cy3 signal (Input)        | Cy5 signal (MeDIP) |  |
| A_68_P32982443 | chr5:135115150-135115194                          | NM_033561:26      | Eif4h      | INSIDE                 | 0.591                                                        | 0.556                          | 1596.44            | 888.28             | 0.329                          | 1252.95                   | 411.72             |  |
| A_68_P32982444 | chr5:135115258-135115302                          | NM_033561:-82     | Eif4h      | PROMOTER               | 0.652                                                        | 3.251                          | 2202.82            | 7162.43            | 2.119                          | 1880.78                   | 3985.80            |  |
| A_68_P28744646 | chr12:112776044-112776088                         | NM_173363:-245    | Eif5       | PROMOTER               | 0.472                                                        | 0.292                          | 2963.42            | 865.80             | 0.138                          | 2159.00                   | 297.81             |  |
| A_68_P27897963 | chr11:69734825-69734869                           | NM_001166595:-69  | Eif5a      | PROMOTER               | 0.047                                                        | 4.336                          | 6910.82            | 29962.82           | 0.205                          | 4611.64                   | 946.52             |  |
| A_68_P27897958 | chr11:69734258-69734302                           | NM_001166590:-148 | Eif5a      | PROMOTER               | 0.172                                                        | 14.029                         | 6402.64            | 89824.87           | 2.417                          | 5746.65                   | 13890.47           |  |
| A_68_P27897961 | chr11:69734599-69734643                           | NM_001166596:-33  | Eif5a      | PROMOTER               | 0.359                                                        | 0.344                          | 2065.80            | 711.09             | 0.123                          | 1447.09                   | 178.64             |  |
| A_68_P27897964 | chr11:69734972-69735016                           | NM_001166589:-106 | Eif5a      | PROMOTER               | 0.501                                                        | 0.614                          | 3202.60            | 1967.17            | 0.308                          | 2345.28                   | 721.62             |  |
| A_68_P22019078 | chr3:28680105-28680149                            | NM_177586:-106    | Eif5a2     | PROMOTER               | 0.352                                                        | 6.185                          | 3411.61            | 21100.71           | 2.177                          | 2906.89                   | 6327.09            |  |
| A_68_P22019079 | chr3:28680302-28680346                            | NM_177586:92      | Eif5a2     | INSIDE                 | 0.391                                                        | 15.799                         | 1661.00            | 26241.40           | 6.178                          | 1514.36                   | 9355.38            |  |
| A_68_P20157022 | chr1:38055055-38055099                            | NM_198303:222     | Eif5b      | INSIDE                 | 0.662                                                        | 0.404                          | 1567.51            | 632.84             | 0.267                          | 1211.38                   | 323.85             |  |
| A_68_P21767848 | chr2:155651937-155651981                          | NM_010579:703     | Eif6       | INSIDE                 | 0.588                                                        | 0.313                          | 2692.86            | 842.90             | 0.184                          | 1625.16                   | 299.01             |  |
| A_68_P31827572 | chr18:73914245-73914289                           | NM_053255:-133    | Elac1      | PROMOTER               | 0.42                                                         | 0.580                          | 1720.24            | 997.68             | 0.243                          | 1415.22                   | 344.38             |  |
| A_68_P23103759 | chr4:91041388-91041432                            | NM_010486:-2664   | Elavl2     | PROMOTER               | 0.495                                                        | 0.586                          | 2540.60            | 1489.80            | 0.29                           | 1928.59                   | 559.55             |  |
| A_68_P23103735 | chr4:91038685-91038729                            | NM_010486:40      | Elavl2     | INSIDE                 | 0.575                                                        | 7.470                          | 2803.23            | 20940.94           | 4.293                          | 2468.40                   | 10595.95           |  |
| A_68_P26350213 | chr9:21855003-21855047                            | NM_010487:1443    | Elavl3     | INSIDE                 | 0.41                                                         | 7.923                          | 2629.52            | 20834.43           | 3.249                          | 2114.97                   | 6871.46            |  |
| A_68_P26350214 | chr9:21855080-21855124                            | NM_010487:1365    | Elavl3     | INSIDE                 | 0.585                                                        | 2.981                          | 1316.48            | 3925.00            | 1.745                          | 1124.80                   | 1962.35            |  |
| A_68_P26350216 | chr9:21855292-21855336                            | NM_010487:1153    | Elavl3     | INSIDE                 | 0.505                                                        | 4.291                          | 753.28             | 3232.32            | 2.166                          | 517.23                    | 1120.19            |  |
| A_68_P23205807 | chr4:110024246-110024290                          | NM_001163397:248  | Elavl4     | INSIDE                 | 0.356                                                        | 0.520                          | 1206.22            | 627.17             | 0.185                          | 1001.49                   | 185.13             |  |
| A_68_P23205808 | chr4:110024387-110024431                          | NM_001163397:108  | Elavl4     | INSIDE                 | 0.63                                                         | 0.458                          | 1440.13            | 659.36             | 0.288                          | 1136.72                   | 327.63             |  |
| A_68_P22128837 | chr3:51081149-51081193                            | NM_023502:48739   | Eif2       | INSIDE                 | 0.242                                                        | 0.357                          | 2832.38            | 1012.22            | 0.087                          | 2020.41                   | 174.93             |  |
| A_68_P22128839 | chr3:51081429-51081473                            | NM_023502:48459   | Eif2       | INSIDE                 | 0.27                                                         | 19.593                         | 1389.14            | 27217.97           | 5.291                          | 1433.08                   | 7582.12            |  |
| A_68_P22128832 | chr3:51080406-51080450                            | NM_023502:49481   | Eif2       | INSIDE                 | 0.39                                                         | 4.559                          | 3023.51            | 13783.43           | 1.778                          | 2390.05                   | 4250.32            |  |
| A_68_P22128834 | chr3:51080739-51080783                            | NM_023502:49149   | Eif2       | INSIDE                 | 0.398                                                        | 11.927                         | 3179.26            | 37917.70           | 4.741                          | 2733.37                   | 12959.40           |  |
| A_68_P24138655 | chr5:140448297-140448346                          | NM_175522:64425   | Elfn1      | INSIDE                 | 0.521                                                        | 10.016                         | 1341.34            | 13434.61           | 5.216                          | 977.49                    | 5098.59            |  |
| A_68_P24138666 | chr5:140449442-140449486                          | NM_175522:65568   | Elfn1      | INSIDE                 | 0.599                                                        | 3.494                          | 2262.08            | 7903.52            | 2.093                          | 1640.20                   | 3432.18            |  |
| A_68_P24138654 | chr5:140448211-140448259                          | NM_175522:64338   | Elfn1      | INSIDE                 | 0.325                                                        | 5.593                          | 1260.89            | 7052.73            | 1.815                          | 933.20                    | 1694.06            |  |
| A_68_P24138255 | chr5:140384458-140384502                          | NM_175522:584     | Elfn1      | INSIDE                 | 0.436                                                        | 5.201                          | 378.20             | 1966.97            | 2.269                          | 374.69                    | 850.00             |  |
| A_68_P24138292 | chr5:140388982-140389026                          | NM_175522:5108    | Elfn1      | INSIDE                 | 0.552                                                        | 1.333                          | 5128.84            | 6837.46            | 0.735                          | 3662.78                   | 2693.37            |  |
| A_68_P30361565 | chr15:78503546-78503590                           | NM_183141:44975   | Elfn2      | INSIDE                 | 0.159                                                        | 16.703                         | 784.62             | 13105.85           | 2.655                          | 523.15                    | 1389.09            |  |
| A_68_P30361566 | chr15:78503626-78503670                           | NM_183141:44895   | Elfn2      | INSIDE                 | 0.162                                                        | 28.618                         | 1775.59            | 50813.45           | 4.627                          | 1443.11                   | 6676.69            |  |
| A_68_P30361918 | chr15:78549192-78549236                           | NM_183141:-671    | Elfn2      | PROMOTER               | 0.655                                                        | 3.000                          | 2785.14            | 8355.97            | 1.966                          | 2073.22                   | 4075.04            |  |
| A_68_P27352992 | chr10:92773316-92773360                           | NM_013508:566     | Elk3       | INSIDE                 | 0.427                                                        | 3.990                          | 3898.63            | 15556.10           | 1.702                          | 3263.63                   | 5555.05            |  |
| A_68_P25952517 | chr8:73062831-73062889                            | NM_007924:-713    | Eil1       | PROMOTER               | 0.454                                                        | 0.241                          | 1964.80            | 472.53             | 0.109                          | 1572.63                   | 171.80             |  |
| A_68_P29150855 | chr13:75845818-75845862                           | NM_138953:909     | Eil2       | INSIDE                 | 0.395                                                        | 0.155                          | 3951.55            | 614.05             | 0.061                          | 2811.48                   | 172.60             |  |
| A_68_P29150847 | chr13:75844848-75844893                           | NM_138953:-61     | Eil2       | PROMOTER               | 0.282                                                        | 0.682                          | 1166.97            | 795.48             | 0.192                          | 883.32                    | 169.72             |  |
| A_68_P28865541 | chr13:20183122-20183166                           | NM_080288:769     | Elmo1      | INSIDE                 | 0.433                                                        | 0.207                          | 2258.52            | 467.88             | 0.09                           | 1910.49                   | 171.29             |  |
| A_68_P28865538 | chr13:20182700-20182744                           | NM_080288:347     | Elmo1      | INSIDE                 | 0.482                                                        | 6.300                          | 1929.69            | 12156.71           | 3.037                          | 1914.47                   | 5814.15            |  |
| A_68_P28865540 | chr13:20183015-20183059                           | NM_080288:661     | Elmo1      | INSIDE                 | 0.559                                                        | 0.332                          | 1556.77            | 516.59             | 0.185                          | 1297.00                   | 240.59             |  |
| A_68_P28865539 | chr13:20182875-20182919                           | NM_080288:521     | Elmo1      | INSIDE                 | 0.55                                                         | 0.615                          | 5407.23            | 3326.13            | 0.338                          | 4207.06                   | 1423.58            |  |
| A_68_P26014555 | chr8:85856129-85856173                            | NM_001170691:235  | Elmod2     | INSIDE                 | 0.341                                                        | 13.263                         | 3003.85            | 39839.69           | 4.522                          | 2637.03                   | 11924.19           |  |
| A_68_P26685702 | chr9:83699787-83699831                            | NM_001145974:41   | Elov14     | INSIDE                 | 0.588                                                        | 19.406                         | 8364.67            | 162324.50          | 11.418                         | 7310.91                   | 83473.79           |  |
| A_68_P26657027 | chr9:77765735-77765781                            | NM_134255:587     | Elov15     | INSIDE                 | 0.45                                                         | 4.528                          | 1699.60            | 7696.50            | 2.038                          | 1355.55                   | 2763.24            |  |
| A_68_P26656976 | chr9:77758360-77758404                            | NM_134255:-6789   | Elov15     | PROMOTER               | 0.429                                                        | 3.795                          | 923.05             | 3503.07            | 1.627                          | 711.41                    | 1157.53            |  |
| A_68_P22520451 | chr3:129236724-129236768                          | NM_130450:1443    | Elov16     | INSIDE                 | 0.54                                                         | 5.192                          | 513.19             | 2664.64            | 2.806                          | 485.70                    | 1362.78            |  |
| A_68_P21497226 | chr2:105744559-105744603                          | NM_023876:77      | Elp4       | INSIDE                 | 0.404                                                        | 9.492                          | 3531.32            | 33520.20           | 3.83                           | 3064.70                   | 11739.00           |  |
| A_68_P29361885 | chr13:118009364-118009408                         | NM_010330:7       | Emb        | INSIDE                 | 0.5                                                          | 5.189                          | 1126.27            | 5843.97            | 2.596                          | 938.97                    | 2437.30            |  |

| ProbeName      | Target position of probe on CpG island microarray | TargetID           | GeneSymbol | CpG island Description | Ratio of relative methylation (TiO <sub>2</sub> -NP/Vehicle) | Sham group                     |                    |                    | TiO <sub>2</sub> -H group      |                    |                    |
|----------------|---------------------------------------------------|--------------------|------------|------------------------|--------------------------------------------------------------|--------------------------------|--------------------|--------------------|--------------------------------|--------------------|--------------------|
|                |                                                   |                    |            |                        |                                                              | Relative methylation (Cy5/Cy3) | Cy3 signal (Input) | Cy5 signal (MeDIP) | Relative methylation (Cy5/Cy3) | Cy3 signal (Input) | Cy5 signal (MeDIP) |
| A_68_P29361890 | chr13:118009924-118009968                         | NM_010330:567      | Emb        | INSIDE                 | 0.503                                                        | 2.924                          | 1651.22            | 4828.68            | 1.47                           | 1363.71            | 2004.64            |
| A_68_P24123515 | chr5:137358798-137358842                          | NM_024474:157      | Emid2      | INSIDE                 | 0.433                                                        | 5.247                          | 2053.22            | 10773.15           | 2.271                          | 1648.20            | 3742.74            |
| A_68_P24123512 | chr5:137358486-137358530                          | NM_024474:469      | Emid2      | INSIDE                 | 0.446                                                        | 0.469                          | 1151.88            | 540.22             | 0.209                          | 843.40             | 176.34             |
| A_68_P24123511 | chr5:137358417-137358461                          | NM_024474:539      | Emid2      | INSIDE                 | 0.466                                                        | 0.456                          | 6255.40            | 2854.37            | 0.212                          | 4107.58            | 872.52             |
| A_68_P24123513 | chr5:137358561-137358605                          | NM_024474:395      | Emid2      | INSIDE                 | 0.476                                                        | 0.498                          | 2429.93            | 1209.22            | 0.237                          | 1841.67            | 436.09             |
| A_68_P24123508 | chr5:137357952-137357996                          | NM_024474:1003     | Emid2      | INSIDE                 | 0.595                                                        | 4.171                          | 1521.09            | 6344.50            | 2.481                          | 1267.70            | 3145.80            |
| A_68_P31333820 | chr17:71660018-71660062                           | NM_145158:265      | Emilin2    | INSIDE                 | 0.317                                                        | 10.032                         | 1101.64            | 11051.42           | 3.182                          | 1135.43            | 3612.94            |
| A_68_P31398414 | chr17:83750191-83750235                           | NM_001114361:-58   | Eml4       | PROMOTER               | 0.623                                                        | 3.139                          | 735.81             | 2309.96            | 1.957                          | 615.22             | 1204.15            |
| A_68_P28672821 | chr12:100139294-100139338                         | NM_001081191:378   | Eml5       | INSIDE                 | 0.631                                                        | 2.403                          | 1453.07            | 3491.18            | 1.515                          | 1262.87            | 1913.14            |
| A_68_P27677360 | chr11:29924702-29924746                           | NM_146016:1309     | Eml6       | INSIDE                 | 0.611                                                        | 2.473                          | 6704.14            | 16579.08           | 1.512                          | 4802.32            | 7259.60            |
| A_68_P30541580 | chr16:10313819-10313863                           | NM_007929:221      | Emp2       | INSIDE                 | 0.21                                                         | 0.465                          | 7071.89            | 3289.10            | 0.098                          | 4370.11            | 427.19             |
| A_68_P24603559 | chr6:85137815-85137859                            | NM_010131:-88      | Emx1       | PROMOTER               | 0.524                                                        | 13.012                         | 2471.87            | 32164.52           | 6.817                          | 1983.08            | 13518.39           |
| A_68_P24603556 | chr6:85137482-85137526                            | NM_010131:-420     | Emx1       | PROMOTER               | 0.257                                                        | 6.750                          | 1720.97            | 11615.93           | 1.734                          | 1516.02            | 2629.00            |
| A_68_P32219569 | chr19:59533670-59533714                           | NM_010132:513      | Emx2       | INSIDE                 | 0.639                                                        | 4.411                          | 751.09             | 3312.96            | 2.82                           | 593.46             | 1673.49            |
| A_68_P32219573 | chr19:59534086-59534130                           | NM_010132:929      | Emx2       | INSIDE                 | 0.357                                                        | 0.624                          | 1603.08            | 1000.96            | 0.223                          | 1223.71            | 272.44             |
| A_68_P32219575 | chr19:59534436-59534480                           | NM_010132:1279     | Emx2       | INSIDE                 | 0.578                                                        | 0.617                          | 1162.37            | 717.29             | 0.357                          | 943.22             | 336.53             |
| A_68_P32219657 | chr19:59543612-59543656                           | NM_010132:10455    | Emx2       | DOWNSTREAM             | 0.305                                                        | 6.617                          | 657.74             | 4352.48            | 2.02                           | 591.45             | 1194.75            |
| A_68_P20884849 | chr1:183950484-183950528                          | NM_001083120:-395  | Enah       | PROMOTER               | 0.335                                                        | 4.212                          | 3460.14            | 14575.45           | 1.412                          | 3051.03            | 4309.19            |
| A_68_P29250236 | chr13:98010968-98011012                           | NM_007930:-69      | Enc1       | PROMOTER               | 0.387                                                        | 17.089                         | 1550.45            | 26494.92           | 6.619                          | 1118.27            | 7402.22            |
| A_68_P29250235 | chr13:98010886-98010930                           | NM_007930:-151     | Enc1       | PROMOTER               | 0.527                                                        | 4.667                          | 1649.16            | 7697.38            | 2.462                          | 1465.44            | 3607.38            |
| A_68_P29250239 | chr13:98011276-98011320                           | NM_007930:239      | Enc1       | INSIDE                 | 0.299                                                        | 0.702                          | 1251.11            | 878.43             | 0.21                           | 954.41             | 200.36             |
| A_68_P29250243 | chr13:98011697-98011741                           | NM_007930:659      | Enc1       | INSIDE                 | 0.566                                                        | 0.586                          | 1323.43            | 775.89             | 0.332                          | 941.48             | 312.46             |
| A_68_P26317084 | chr9:14185441-14185485                            | NM_028013:224      | Endod1     | INSIDE                 | 0.593                                                        | 2.891                          | 956.09             | 2764.34            | 1.714                          | 872.74             | 1495.66            |
| A_68_P28171535 | chr11:118338434-118338478                         | NM_172573:183      | Engase     | INSIDE                 | 0.505                                                        | 0.714                          | 3113.19            | 2222.52            | 0.36                           | 2533.24            | 912.59             |
| A_68_P22863377 | chr4:41586983-41587027                            | NM_027147:331      | Enho       | INSIDE                 | 0.562                                                        | 0.427                          | 2488.66            | 1063.82            | 0.24                           | 1929.43            | 463.77             |
| A_68_P23404992 | chr4:149611119-149611164                          | NM_023119:-164     | Eno1       | PROMOTER               | 0.339                                                        | 0.369                          | 1929.69            | 711.55             | 0.125                          | 1478.54            | 184.71             |
| A_68_P23404990 | chr4:149610826-149610870                          | NM_023119:-457     | Eno1       | PROMOTER               | 0.648                                                        | 0.415                          | 1665.56            | 690.86             | 0.269                          | 1403.49            | 377.46             |
| A_68_P24816933 | chr6:124719608-124719652                          | NM_013509:-103     | Eno2       | PROMOTER               | 0.05                                                         | 1.581                          | 6519.70            | 10309.01           | 0.079                          | 4434.36            | 352.50             |
| A_68_P32573188 | chrX:100689079-100689123                          | NR_015508:186      | Enox       | INSIDE                 | 0.221                                                        | 18.153                         | 2531.94            | 45962.15           | 4.012                          | 2671.89            | 10718.50           |
| A_68_P32573186 | chrX:100688845-100688889                          | NR_015508:-48      | Enox       | PROMOTER               | 0.255                                                        | 22.720                         | 1393.18            | 31653.55           | 5.799                          | 1582.72            | 9177.79            |
| A_68_P27010234 | chr10:24431792-24431836                           | NM_008813:94       | Enpp1      | INSIDE                 | 0.371                                                        | 13.199                         | 2581.35            | 34070.65           | 4.9                            | 2096.70            | 10274.84           |
| A_68_P27010233 | chr10:24431686-24431730                           | NM_008813:200      | Enpp1      | INSIDE                 | 0.591                                                        | 0.687                          | 1001.55            | 688.00             | 0.406                          | 832.98             | 338.36             |
| A_68_P28175186 | chr11:118861003-118861047                         | NM_001030291:11523 | Enpp7      | DOWNSTREAM             | 0.275                                                        | 1.391                          | 1867.91            | 2597.56            | 0.382                          | 1369.19            | 523.52             |
| A_68_P21071854 | chr2:25251918-25251962                            | NM_009849:547      | Entpd2     | INSIDE                 | 0.256                                                        | 12.090                         | 2575.41            | 31135.52           | 3.092                          | 2150.57            | 6649.71            |
| A_68_P29695818 | chr14:69955482-69955526                           | NM_026174:297      | Entpd4     | INSIDE                 | 0.381                                                        | 4.259                          | 1479.14            | 6299.78            | 1.624                          | 1130.94            | 1836.46            |
| A_68_P28598113 | chr12:85749685-85749729                           | NM_001026214:273   | Entpd5     | INSIDE                 | 0.341                                                        | 11.123                         | 2704.93            | 30087.60           | 3.79                           | 2475.18            | 9381.37            |
| A_68_P28598112 | chr12:85749605-85749649                           | NM_001026214:353   | Entpd5     | INSIDE                 | 0.448                                                        | 9.518                          | 2268.13            | 21587.34           | 4.262                          | 1858.42            | 7920.01            |
| A_68_P32128058 | chr19:43764232-43764276                           | NM_053103:76       | Entpd7     | INSIDE                 | 0.524                                                        | 0.496                          | 1447.72            | 718.17             | 0.26                           | 1176.65            | 306.15             |
| A_68_P30378498 | chr15:81415923-81415967                           | NM_177821:-699     | Ep300      | PROMOTER               | 0.406                                                        | 0.219                          | 2512.77            | 550.30             | 0.089                          | 1908.37            | 169.55             |
| A_68_P30378505 | chr15:81416613-81416657                           | NM_177821:-9       | Ep300      | PROMOTER               | 0.58                                                         | 3.751                          | 800.48             | 3002.47            | 2.174                          | 719.50             | 1563.92            |
| A_68_P30378500 | chr15:81416070-81416114                           | NM_177821:-551     | Ep300      | PROMOTER               | 0.5                                                          | 0.561                          | 1474.79            | 827.92             | 0.281                          | 1083.99            | 304.46             |
| A_68_P30378507 | chr15:81416859-81416903                           | NM_177821:237      | Ep300      | INSIDE                 | 0.509                                                        | 2.956                          | 3158.82            | 9338.85            | 1.506                          | 2500.65            | 3766.12            |
| A_68_P23309924 | chr4:131604876-131604920                          | NM_001128606:95    | Epb4.1     | INSIDE                 | 0.284                                                        | 11.018                         | 1979.51            | 21810.15           | 3.133                          | 2156.98            | 6758.17            |
| A_68_P23309921 | chr4:131604501-131604545                          | NM_001128606:471   | Epb4.1     | INSIDE                 | 0.623                                                        | 7.245                          | 2333.47            | 16906.60           | 4.517                          | 2015.94            | 9105.56            |
| A_68_P31610600 | chr18:34165600-34165644                           | NM_013512:1238     | Epb4.114a  | INSIDE                 | 0.255                                                        | 17.685                         | 5320.33            | 94091.75           | 4.51                           | 6017.10            | 27137.76           |
| A_68_P31610604 | chr18:34166101-34166145                           | NM_013512:738      | Epb4.114a  | INSIDE                 | 0.589                                                        | 0.359                          | 3036.85            | 1089.35            | 0.211                          | 2194.39            | 463.45             |

| ProbeName      | Target position of probe on CpG island microarray | TargetID           | GeneSymbol | CpG island Description | Ratio of relative methylation (TiO <sub>2</sub> -NP/Vehicle) | Sham group                     |                    |                    |                                | TiO <sub>2</sub> -H group |                    |  |
|----------------|---------------------------------------------------|--------------------|------------|------------------------|--------------------------------------------------------------|--------------------------------|--------------------|--------------------|--------------------------------|---------------------------|--------------------|--|
|                |                                                   |                    |            |                        |                                                              | Relative methylation (Cy5/Cy3) | Cy3 signal (Input) | Cy5 signal (MeDIP) | Relative methylation (Cy5/Cy3) | Cy3 signal (Input)        | Cy5 signal (MeDIP) |  |
| A_68_P20558189 | chr1:121545562-121545606                          | NM_145506:-7       | Epb4.115   | PROMOTER               | 0.608                                                        | 0.513                          | 1099.49            | 563.82             | 0.312                          | 1000.69                   | 312.03             |  |
| A_68_P31473580 | chr18:6490337-6490381                             | NM_027497:496      | Epc1       | INSIDE                 | 0.568                                                        | 2.586                          | 1730.38            | 4474.29            | 1.469                          | 1441.81                   | 2118.12            |  |
| A_68_P21202304 | chr2:49307386-49307430                            | NM_172663:403      | Epc2       | INSIDE                 | 0.436                                                        | 0.313                          | 2584.01            | 809.75             | 0.136                          | 1819.89                   | 248.40             |  |
| A_68_P21202301 | chr2:49307033-49307077                            | NM_172663:49       | Epc2       | INSIDE                 | 0.444                                                        | 4.974                          | 1836.07            | 9132.72            | 2.21                           | 1649.07                   | 3644.79            |  |
| A_68_P21202298 | chr2:49306701-49306745                            | NM_172663:-283     | Epc2       | PROMOTER               | 0.458                                                        | 4.303                          | 806.59             | 3470.77            | 1.971                          | 725.25                    | 1429.59            |  |
| A_68_P28863236 | chr13:19711521-19711565                           | NM_134065:157      | Epdr1      | INSIDE                 | 0.548                                                        | 0.599                          | 987.20             | 591.78             | 0.329                          | 788.55                    | 259.14             |  |
| A_68_P23270846 | chr4:124559573-124559617                          | NM_177671:566      | Epha10     | INSIDE                 | 0.178                                                        | 1.915                          | 12164.25           | 23297.14           | 0.342                          | 8002.88                   | 2735.82            |  |
| A_68_P23270845 | chr4:124559481-124559525                          | NM_177671:474      | Epha10     | INSIDE                 | 0.468                                                        | 0.521                          | 9488.65            | 4942.85            | 0.244                          | 6764.70                   | 1649.03            |  |
| A_68_P23270847 | chr4:124559714-124559758                          | NM_177671:708      | Epha10     | INSIDE                 | 0.526                                                        | 0.522                          | 2414.62            | 1259.56            | 0.274                          | 1818.71                   | 498.69             |  |
| A_68_P23270910 | chr4:124571819-124571863                          | NM_177671:12812    | Epha10     | DOWNSTREAM             | 0.462                                                        | 1.517                          | 7443.31            | 11294.07           | 0.701                          | 5094.91                   | 3570.32            |  |
| A_68_P23363269 | chr4:140864959-140865003                          | NM_010139:7826     | Epha2      | INSIDE                 | 0.211                                                        | 10.036                         | 3252.79            | 32644.13           | 2.114                          | 2360.02                   | 4989.13            |  |
| A_68_P23363270 | chr4:140865058-140865102                          | NM_010139:7926     | Epha2      | INSIDE                 | 0.426                                                        | 6.445                          | 1169.23            | 7535.23            | 2.744                          | 663.55                    | 1820.48            |  |
| A_68_P23363268 | chr4:140864869-140864913                          | NM_010139:7736     | Epha2      | INSIDE                 | 0.476                                                        | 4.808                          | 1408.11            | 6770.53            | 2.289                          | 1137.61                   | 2603.55            |  |
| A_68_P30817172 | chr16:63857062-63857106                           | NM_010140:6899     | Epha3      | INSIDE                 | 0.231                                                        | 8.919                          | 2440.75            | 21769.50           | 2.06                           | 1983.97                   | 4086.01            |  |
| A_68_P20366327 | chr1:77511720-77511764                            | NM_007936:-79      | Epha4      | PROMOTER               | 0.465                                                        | 0.635                          | 5367.05            | 3407.24            | 0.295                          | 3817.69                   | 1127.11            |  |
| A_68_P23854797 | chr5:84846399-84846443                            | NM_007937:-13      | Epha5      | PROMOTER               | 0.434                                                        | 4.007                          | 1176.56            | 4714.05            | 1.738                          | 1210.33                   | 2103.73            |  |
| A_68_P26779727 | chr9:102256967-102257011                          | NM_001168296:35    | Epbh1      | INSIDE                 | 0.059                                                        | 2.231                          | 4566.96            | 10189.52           | 0.133                          | 3276.99                   | 434.71             |  |
| A_68_P23336241 | chr4:136391071-136391115                          | NM_010142:758      | Epbh2      | INSIDE                 | 0.205                                                        | 12.078                         | 3553.86            | 42924.61           | 2.477                          | 2836.70                   | 7026.98            |  |
| A_68_P23335794 | chr4:136326887-136326931                          | NM_010142:64942    | Epbh2      | INSIDE                 | 0.344                                                        | 6.665                          | 3283.90            | 21887.63           | 2.294                          | 2436.67                   | 5589.13            |  |
| A_68_P23335297 | chr4:136250002-136250046                          | NM_010142:141826   | Epbh2      | INSIDE                 | 0.354                                                        | 4.198                          | 2213.18            | 9291.28            | 1.485                          | 1669.64                   | 2478.92            |  |
| A_68_P30590967 | chr16:21205377-21205421                           | NM_010143:531      | Epbh3      | INSIDE                 | 0.358                                                        | 34.900                         | 1027.96            | 35875.76           | 12.51                          | 965.36                    | 12076.20           |  |
| A_68_P30590962 | chr16:21204783-21204827                           | NM_010143:-63      | Epbh3      | PROMOTER               | 0.386                                                        | 5.390                          | 817.09             | 4404.46            | 2.082                          | 718.80                    | 1496.36            |  |
| A_68_P24125311 | chr5:137791525-137791569                          | NM_001159571:210   | Epbh4      | INSIDE                 | 0.595                                                        | 0.409                          | 4971.76            | 2034.98            | 0.244                          | 3491.94                   | 850.67             |  |
| A_68_P24125309 | chr5:137791367-137791411                          | NM_001159571:52    | Epbh4      | INSIDE                 | 0.206                                                        | 1.898                          | 1266.87            | 2404.99            | 0.392                          | 1041.07                   | 407.73             |  |
| A_68_P27849286 | chr11:61393305-61393349                           | NM_010148:-173     | Epn2       | PROMOTER               | 0.27                                                         | 12.658                         | 3215.04            | 40697.20           | 3.417                          | 2890.16                   | 9875.89            |  |
| A_68_P27849285 | chr11:61393132-61393176                           | NM_010148:-1       | Epn2       | PROMOTER               | 0.652                                                        | 3.918                          | 2672.87            | 10471.73           | 2.555                          | 2060.15                   | 5263.19            |  |
| A_68_P27849284 | chr11:61392956-61393000                           | NM_010148:175      | Epn2       | INSIDE                 | 0.402                                                        | 0.653                          | 811.95             | 529.83             | 0.262                          | 667.58                    | 174.93             |  |
| A_68_P23200236 | chr4:108953010-108953054                          | NM_007943:153      | Eps15      | INSIDE                 | 0.48                                                         | 0.464                          | 2234.17            | 1036.89            | 0.223                          | 1849.75                   | 411.73             |  |
| A_68_P23200238 | chr4:108953316-108953360                          | NM_007943:459      | Eps15      | INSIDE                 | 0.552                                                        | 3.128                          | 735.72             | 2301.60            | 1.727                          | 759.08                    | 1311.10            |  |
| A_68_P23200234 | chr4:108952731-108952775                          | NM_007943:-127     | Eps15      | PROMOTER               | 0.462                                                        | 2.988                          | 2393.83            | 7153.75            | 1.379                          | 2075.68                   | 2863.28            |  |
| A_68_P23571444 | chr5:30559486-30559531                            | NM_027652:351      | Ept1       | INSIDE                 | 0.314                                                        | 5.256                          | 1327.07            | 6975.27            | 1.65                           | 1190.33                   | 1964.40            |  |
| A_68_P28056291 | chr11:98274041-98274085                           | NM_001003817:265   | Erb2       | INSIDE                 | 0.241                                                        | 12.656                         | 820.36             | 10382.44           | 3.054                          | 629.14                    | 1921.48            |  |
| A_68_P28056288 | chr11:98273791-98273835                           | NM_001003817:15    | Erb2       | INSIDE                 | 0.302                                                        | 0.514                          | 4851.63            | 2493.44            | 0.155                          | 3713.58                   | 576.32             |  |
| A_68_P29287630 | chr13:104711739-104711783                         | NM_001005868:-1166 | Erb2ip     | PROMOTER               | 0.438                                                        | 13.548                         | 2962.07            | 40129.85           | 5.928                          | 2591.35                   | 15362.63           |  |
| A_68_P29287623 | chr13:104710322-104710366                         | NM_001005868:250   | Erb2ip     | INSIDE                 | 0.631                                                        | 0.431                          | 1483.04            | 638.91             | 0.272                          | 1316.64                   | 358.09             |  |
| A_68_P20317726 | chr1:69154255-69154299                            | NM_010154:357      | Erb4       | INSIDE                 | 0.6                                                          | 0.514                          | 5204.13            | 2676.20            | 0.309                          | 4079.23                   | 1259.03            |  |
| A_68_P24795429 | chr6:119797862-119797906                          | NM_053204:284      | Erc1       | INSIDE                 | 0.323                                                        | 5.903                          | 1312.07            | 7745.55            | 1.908                          | 1114.75                   | 2126.52            |  |
| A_68_P24795427 | chr6:119797721-119797765                          | NM_053204:426      | Erc1       | INSIDE                 | 0.479                                                        | 3.019                          | 2956.66            | 8925.84            | 1.447                          | 2463.29                   | 3563.37            |  |
| A_68_P29488026 | chr14:28435956-28436000                           | NM_177814:351      | Erc2       | INSIDE                 | 0.111                                                        | 1.853                          | 1225.17            | 2270.13            | 0.205                          | 856.04                    | 175.52             |  |
| A_68_P29488024 | chr14:28435732-28435776                           | NM_177814:127      | Erc2       | INSIDE                 | 0.365                                                        | 11.324                         | 1557.29            | 17634.33           | 4.133                          | 1235.41                   | 5106.51            |  |
| A_68_P29488027 | chr14:28436033-28436077                           | NM_177814:427      | Erc2       | INSIDE                 | 0.362                                                        | 1.734                          | 3404.93            | 5904.79            | 0.627                          | 2270.83                   | 1424.01            |  |
| A_68_P24992765 | chr7:19927675-19927719                            | NM_001127324:-2723 | Erec1      | PROMOTER               | 0.5                                                          | 15.299                         | 1261.08            | 19293.71           | 7.656                          | 963.79                    | 7378.38            |  |
| A_68_P30555522 | chr16:13110157-13110201                           | NM_015769:350      | Erec4      | INSIDE                 | 0.581                                                        | 5.396                          | 2542.99            | 13721.66           | 3.137                          | 2061.91                   | 6467.44            |  |
| A_68_P30555521 | chr16:13110069-13110113                           | NM_015769:262      | Erec4      | INSIDE                 | 0.456                                                        | 0.691                          | 1057.95            | 730.63             | 0.315                          | 896.16                    | 282.30             |  |
| A_68_P20192816 | chr1:44204826-44204870                            | NM_011729:260      | Erec5      | INSIDE                 | 0.505                                                        | 12.080                         | 1909.39            | 23066.39           | 6.096                          | 1463.77                   | 8923.56            |  |
| A_68_P20192817 | chr1:44204965-44205009                            | NM_011729:398      | Erec5      | INSIDE                 | 0.391                                                        | 4.386                          | 2045.98            | 8972.74            | 1.714                          | 1934.97                   | 3316.70            |  |

| ProbeName      | Target position of probe on CpG island microarray | TargetID           | GeneSymbol | CpG island Description | Ratio of relative methylation (TiO <sub>2</sub> -NP/Vehicle) | Sham group                     |                    |                    | TiO <sub>2</sub> -H group      |                    |                    |
|----------------|---------------------------------------------------|--------------------|------------|------------------------|--------------------------------------------------------------|--------------------------------|--------------------|--------------------|--------------------------------|--------------------|--------------------|
|                |                                                   |                    |            |                        |                                                              | Relative methylation (Cy5/Cy3) | Cy3 signal (Input) | Cy5 signal (MeDIP) | Relative methylation (Cy5/Cy3) | Cy3 signal (Input) | Cy5 signal (MeDIP) |
| A_68_P32567492 | chrX:99352458-99352502                            | NM_146235:-50      | Ercoc61    | PROMOTER               | 0.362                                                        | 16.180                         | 567.04             | 9174.78            | 5.854                          | 614.16             | 3595.25            |
| A_68_P21768928 | chr2:155834064-155834108                          | NM_025516:226      | Ergic3     | INSIDE                 | 0.527                                                        | 0.396                          | 2346.42            | 929.46             | 0.209                          | 1688.81            | 352.79             |
| A_68_P28576808 | chr12:81744517-81744561                           | NM_007951:310      | Erh        | INSIDE                 | 0.315                                                        | 11.954                         | 1260.18            | 15063.69           | 3.764                          | 1721.71            | 6480.22            |
| A_68_P25780173 | chr8:36558550-36558594                            | NM_026067:15       | Eri1       | INSIDE                 | 0.514                                                        | 4.763                          | 754.71             | 3594.44            | 2.447                          | 717.97             | 1756.73            |
| A_68_P25780168 | chr8:36557978-36558022                            | NM_026067:587      | Eri1       | INSIDE                 | 0.647                                                        | 0.429                          | 1898.39            | 814.57             | 0.278                          | 1444.71            | 401.08             |
| A_68_P23235083 | chr4:117223023-117223067                          | NM_080469:-54      | Eri3       | PROMOTER               | 0.388                                                        | 10.474                         | 761.48             | 7975.61            | 4.065                          | 640.08             | 2601.64            |
| A_68_P23235082 | chr4:117222946-117222990                          | NM_080469:-130     | Eri3       | PROMOTER               | 0.489                                                        | 3.272                          | 1244.62            | 4072.15            | 1.601                          | 1053.42            | 1686.27            |
| A_68_P27681336 | chr11:30854073-30854117                           | NM_025745:37       | Erlec1     | INSIDE                 | 0.431                                                        | 15.294                         | 1201.40            | 18374.23           | 6.588                          | 1212.06            | 7984.66            |
| A_68_P28832915 | chr13:12658494-12658538                           | NM_026184:367      | Erol1b     | INSIDE                 | 0.512                                                        | 2.906                          | 2804.12            | 8147.78            | 1.488                          | 2181.41            | 3246.35            |
| A_68_P22899537 | chr4:48292195-48292239                            | NM_029572:245      | Erp44      | INSIDE                 | 0.328                                                        | 20.199                         | 1918.62            | 38753.41           | 6.627                          | 1700.90            | 11272.16           |
| A_68_P22899538 | chr4:48292337-48292381                            | NM_029572:103      | Erp44      | INSIDE                 | 0.437                                                        | 4.752                          | 5227.92            | 24843.35           | 2.074                          | 3973.13            | 8241.76            |
| A_68_P23408691 | chr4:150229048-150229092                          | NM_133753:-129     | Erff1      | PROMOTER               | 0.258                                                        | 13.398                         | 1914.87            | 25654.75           | 3.461                          | 1888.53            | 6536.88            |
| A_68_P31490817 | chr18:10609887-10609931                           | NM_001081222:442   | Esco1      | INSIDE                 | 0.574                                                        | 2.875                          | 1192.44            | 3428.37            | 1.65                           | 968.91             | 1598.64            |
| A_68_P29723690 | chr14:75131937-75131981                           | NM_016903:-193     | Esd        | PROMOTER               | 0.208                                                        | 14.700                         | 4498.44            | 66126.47           | 3.058                          | 3785.84            | 11575.92           |
| A_68_P23416733 | chr4:151506350-151506394                          | NM_019585:-3338    | Espn       | PROMOTER               | 0.355                                                        | 7.677                          | 1821.50            | 13984.02           | 2.727                          | 1384.91            | 3776.43            |
| A_68_P23416723 | chr4:151505009-151505053                          | NM_019585:-1996    | Espn       | PROMOTER               | 0.424                                                        | 0.557                          | 1965.02            | 1094.64            | 0.236                          | 1593.26            | 375.96             |
| A_68_P23416878 | chr4:151527866-151527910                          | NM_207687:-1572    | Espn       | DIVERGENT_PROMOTER     | 0.498                                                        | 0.232                          | 2318.31            | 537.01             | 0.115                          | 1545.10            | 178.17             |
| A_68_P23416730 | chr4:151506015-151506059                          | NM_019585:-3002    | Espn       | PROMOTER               | 0.643                                                        | 0.545                          | 3268.94            | 1782.97            | 0.351                          | 2509.66            | 880.03             |
| A_68_P23416732 | chr4:151506202-151506248                          | NM_019585:-3190    | Espn       | PROMOTER               | 0.434                                                        | 0.497                          | 1206.92            | 600.03             | 0.216                          | 797.00             | 172.07             |
| A_68_P23416728 | chr4:151505797-151505841                          | NM_019585:-2784    | Espn       | PROMOTER               | 0.411                                                        | 3.916                          | 1781.12            | 6975.66            | 1.61                           | 1524.64            | 2454.57            |
| A_68_P20441857 | chr1:93241429-93241473                            | NM_001033292:22799 | Espnl      | INSIDE                 | 0.389                                                        | 1.662                          | 1817.71            | 3021.66            | 0.647                          | 1322.49            | 855.26             |
| A_68_P22729559 | chr4:11315357-11315401                            | NM_194055:-1448    | Esrp1      | PROMOTER               | 0.511                                                        | 3.636                          | 1054.86            | 3835.03            | 1.857                          | 930.36             | 1727.49            |
| A_68_P26137945 | chr8:108660566-108660610                          | NM_176838:286      | Esrp2      | INSIDE                 | 0.65                                                         | 0.324                          | 2548.68            | 824.70             | 0.21                           | 1810.20            | 381.01             |
| A_68_P26137942 | chr8:108660258-108660302                          | NM_176838:594      | Esrp2      | INSIDE                 | 0.495                                                        | 1.404                          | 2065.36            | 2900.47            | 0.695                          | 1833.10            | 1273.28            |
| A_68_P31936680 | chr19:6996479-6996523                             | NM_007953:-202     | Esrra      | PROMOTER               | 0.472                                                        | 0.374                          | 1883.14            | 705.08             | 0.177                          | 1455.58            | 257.50             |
| A_68_P31936679 | chr19:6996326-6996370                             | NM_007953:-50      | Esrra      | PROMOTER               | 0.356                                                        | 5.529                          | 1094.00            | 6048.69            | 1.971                          | 880.80             | 1735.82            |
| A_68_P28610003 | chr12:87763757-87763801                           | NM_011934:1185     | Esrb       | INSIDE                 | 0.416                                                        | 0.533                          | 2274.77            | 1211.82            | 0.222                          | 1852.24            | 410.35             |
| A_68_P32684276 | chrX:133653076-133653120                          | NM_007957:1767     | Esx1       | INSIDE                 | 0.347                                                        | 17.983                         | 1100.34            | 19787.72           | 6.234                          | 1174.61            | 7321.97            |
| A_68_P32684282 | chrX:133653782-133653826                          | NM_007957:1061     | Esx1       | INSIDE                 | 0.537                                                        | 6.061                          | 3063.70            | 18568.97           | 3.252                          | 3479.29            | 11316.30           |
| A_68_P27541865 | chr10:127962373-127962417                         | NM_011843:521      | Esytl      | INSIDE                 | 0.431                                                        | 0.548                          | 2754.52            | 1510.81            | 0.236                          | 1989.60            | 469.96             |
| A_68_P28767111 | chr12:117519591-117519635                         | NM_028731:-82      | Esytl      | PROMOTER               | 0.4                                                          | 5.554                          | 1374.77            | 7636.04            | 2.22                           | 1195.26            | 2653.87            |
| A_68_P22264731 | chr3:79432542-79432586                            | NM_025794:125      | Etfldh     | INSIDE                 | 0.435                                                        | 0.628                          | 1450.12            | 911.34             | 0.274                          | 1156.32            | 316.42             |
| A_68_P25005645 | chr7:25370764-25370808                            | NM_023154:-1775    | Ethe1      | PROMOTER               | 0.079                                                        | 39.582                         | 7587.64            | 300332.50          | 3.107                          | 6440.93            | 20013.85           |
| A_68_P25005644 | chr7:25370658-25370702                            | NM_023154:-1881    | Ethe1      | PROMOTER               | 0.134                                                        | 15.520                         | 6529.11            | 101333.40          | 2.078                          | 4937.82            | 10260.18           |
| A_68_P24908780 | chr6:143116314-143116358                          | NM_029250:587      | Etnk1      | INSIDE                 | 0.226                                                        | 13.949                         | 8225.02            | 114733.00          | 3.146                          | 6017.84            | 18931.90           |
| A_68_P30988901 | chr16:95923763-95923807                           | NM_011809:-229     | Ets2       | PROMOTER               | 0.589                                                        | 0.387                          | 1816.56            | 702.70             | 0.228                          | 1492.15            | 340.03             |
| A_68_P28075715 | chr11:101645928-101645972                         | NM_008815:674      | Etv4       | INSIDE                 | 0.377                                                        | 4.974                          | 1094.81            | 5445.73            | 1.874                          | 1081.42            | 2026.10            |
| A_68_P24859179 | chr6:133986298-133986342                          | NM_007961:596      | Etv6       | INSIDE                 | 0.21                                                         | 17.584                         | 2416.10            | 42484.00           | 3.696                          | 2498.86            | 9236.19            |
| A_68_P24859175 | chr6:133985925-133985969                          | NM_007961:222      | Etv6       | INSIDE                 | 0.219                                                        | 15.081                         | 3526.56            | 53184.74           | 3.303                          | 3088.19            | 10200.62           |
| A_68_P23969232 | chr5:108297963-108298007                          | NM_007964:6142     | Evi5       | INSIDE                 | 0.365                                                        | 7.762                          | 3189.43            | 24757.36           | 2.837                          | 2817.18            | 7992.27            |
| A_68_P28728718 | chr12:109792810-109792854                         | NM_001163394:-97   | Evl        | PROMOTER               | 0.259                                                        | 11.010                         | 8267.83            | 91030.21           | 2.857                          | 7380.15            | 21085.03           |
| A_68_P28158070 | chr11:116083313-116083358                         | NM_025276:16070    | Evpl       | INSIDE                 | 0.228                                                        | 20.723                         | 1782.84            | 36945.26           | 4.722                          | 2000.67            | 9447.97            |
| A_68_P28158149 | chr11:116093971-116094015                         | NM_025276:5413     | Evpl       | INSIDE                 | 0.218                                                        | 1.612                          | 1818.40            | 2930.65            | 0.351                          | 1366.37            | 479.53             |
| A_68_P28158150 | chr11:116094047-116094091                         | NM_025276:5337     | Evpl       | INSIDE                 | 0.267                                                        | 1.690                          | 1758.24            | 2971.87            | 0.452                          | 1098.68            | 496.31             |
| A_68_P24449862 | chr6:52264017-52264061                            | NM_007966:547      | Evx1       | INSIDE                 | 0.331                                                        | 8.966                          | 2241.50            | 20097.16           | 2.964                          | 1807.29            | 5356.27            |
| A_68_P24449831 | chr6:52260423-52260467                            | NM_007966:-3047    | Evx1       | PROMOTER               | 0.468                                                        | 6.727                          | 3488.81            | 23470.92           | 3.148                          | 3200.57            | 10076.31           |

| ProbeName      | Target position of probe on CpG island microarray | TargetID        | GeneSymbol    | CpG island Description | Ratio of relative methylation (TiO <sub>2</sub> -NP/Vehicle) | Sham group                     |                    |                    | TiO <sub>2</sub> -H group      |                    |                    |
|----------------|---------------------------------------------------|-----------------|---------------|------------------------|--------------------------------------------------------------|--------------------------------|--------------------|--------------------|--------------------------------|--------------------|--------------------|
|                |                                                   |                 |               |                        |                                                              | Relative methylation (Cy5/Cy3) | Cy3 signal (Input) | Cy5 signal (MeDIP) | Relative methylation (Cy5/Cy3) | Cy3 signal (Input) | Cy5 signal (MeDIP) |
| A_68_P21338573 | chr2:74497229-74497276                            | NM_007967:224   | Evx2          | INSIDE                 | 0.464                                                        | 0.453                          | 1299.52            | 588.98             | 0.21                           | 899.21             | 189.10             |
| A_68_P21338574 | chr2:74497327-74497371                            | NM_007967:128   | Evx2          | INSIDE                 | 0.61                                                         | 0.403                          | 3941.56            | 1588.83            | 0.246                          | 2804.61            | 689.41             |
| A_68_P27561404 | chr11:4998804-4998848                             | NM_007968:254   | Ewsr1         | INSIDE                 | 0.355                                                        | 5.405                          | 1328.62            | 7181.41            | 1.919                          | 1108.56            | 2127.78            |
| A_68_P27561405 | chr11:4998913-4998957                             | NM_007968:146   | Ewsr1         | INSIDE                 | 0.457                                                        | 3.024                          | 3596.47            | 10875.99           | 1.381                          | 2790.68            | 3853.92            |
| A_68_P21570230 | chr2:119372732-119372776                          | NM_172857:609   | Exd1          | INSIDE                 | 0.59                                                         | 0.405                          | 2373.45            | 961.84             | 0.239                          | 1774.28            | 423.93             |
| A_68_P28575794 | chr12:81564131-81564176                           | NM_133798:72    | Exd2          | INSIDE                 | 0.321                                                        | 0.471                          | 1319.78            | 622.20             | 0.151                          | 1135.68            | 171.87             |
| A_68_P28575798 | chr12:81564728-81564777                           | NM_133798:671   | Exd2          | INSIDE                 | 0.574                                                        | 14.237                         | 1169.38            | 16648.60           | 8.169                          | 1072.06            | 8757.40            |
| A_68_P28920307 | chr13:31065636-31065680                           | NM_025588:258   | Exoc2         | INSIDE                 | 0.648                                                        | 3.109                          | 3193.62            | 9929.31            | 2.016                          | 2610.24            | 5262.42            |
| A_68_P28920310 | chr13:31065956-31066000                           | NM_025588:-62   | Exoc2         | PROMOTER               | 0.606                                                        | 2.761                          | 742.02             | 2048.96            | 1.674                          | 665.08             | 1113.60            |
| A_68_P32096195 | chr19:37625247-37625291                           | NM_175353:361   | Exoc6         | INSIDE                 | 0.62                                                         | 4.482                          | 768.98             | 3446.73            | 2.779                          | 836.16             | 2323.83            |
| A_68_P32096197 | chr19:37625488-37625532                           | NM_175353:603   | Exoc6         | INSIDE                 | 0.508                                                        | 0.675                          | 823.05             | 555.60             | 0.343                          | 676.46             | 232.19             |
| A_68_P24602879 | chr6:85019299-85019343                            | NM_177077:187   | Exoc6b        | INSIDE                 | 0.645                                                        | 0.276                          | 2806.97            | 775.79             | 0.178                          | 2468.89            | 440.04             |
| A_68_P26248326 | chr8:127421066-127421110                          | NM_198103:517   | Exoc8         | INSIDE                 | 0.483                                                        | 5.642                          | 1642.28            | 9265.19            | 2.725                          | 1236.75            | 3369.64            |
| A_68_P26248330 | chr8:127421598-127421642                          | NM_198103:-15   | Exoc8         | DIVERGENT_PROMOTER     | 0.54                                                         | 9.312                          | 1767.78            | 16460.99           | 5.028                          | 1354.38            | 6810.04            |
| A_68_P26248322 | chr8:127420595-127420639                          | NM_198103:989   | Exoc8         | INSIDE                 | 0.571                                                        | 0.663                          | 1022.83            | 677.79             | 0.379                          | 788.59             | 298.57             |
| A_68_P26248320 | chr8:127420438-127420486                          | NM_198103:1143  | Exoc8         | INSIDE                 | 0.454                                                        | 0.634                          | 771.13             | 488.65             | 0.288                          | 624.80             | 179.66             |
| A_68_P26248321 | chr8:127420511-127420555                          | NM_198103:1073  | Exoc8         | INSIDE                 | 0.645                                                        | 0.589                          | 961.84             | 566.73             | 0.38                           | 646.50             | 245.74             |
| A_68_P26166328 | chr8:113580417-113580461                          | NM_028274:200   | Exoc6         | INSIDE                 | 0.522                                                        | 14.354                         | 535.31             | 7684.14            | 7.498                          | 443.88             | 3328.15            |
| A_68_P26166332 | chr8:113580916-113580960                          | NM_028274:700   | Exoc6         | INSIDE                 | 0.375                                                        | 0.661                          | 1867.68            | 1233.62            | 0.248                          | 1515.81            | 375.88             |
| A_68_P26893205 | chr9:123022399-123022443                          | NM_001081188:72 | Exoc7         | INSIDE                 | 0.382                                                        | 0.362                          | 1632.29            | 591.07             | 0.138                          | 1258.68            | 174.19             |
| A_68_P30221123 | chr15:53177744-53177788                           | NM_010162:-28   | Ext1          | PROMOTER               | 0.52                                                         | 5.931                          | 1011.38            | 5998.95            | 3.084                          | 818.78             | 2524.93            |
| A_68_P30221122 | chr15:53177633-53177677                           | NM_010162:84    | Ext1          | INSIDE                 | 0.659                                                        | 7.075                          | 2034.17            | 14390.97           | 4.665                          | 1885.25            | 8794.00            |
| A_68_P29671484 | chr14:65695263-65695307                           | NM_018788:21659 | Extl3         | INSIDE                 | 0.199                                                        | 10.797                         | 2118.30            | 22870.95           | 2.145                          | 1521.00            | 3262.68            |
| A_68_P29671618 | chr14:65716583-65716627                           | NM_018788:339   | Extl3         | INSIDE                 | 0.603                                                        | 0.622                          | 1136.78            | 707.47             | 0.375                          | 1040.53            | 390.25             |
| A_68_P20045407 | chr1:14300000-14300044                            | NM_010164:258   | Eya1          | INSIDE                 | 0.383                                                        | 0.584                          | 1873.15            | 1093.49            | 0.223                          | 1445.08            | 322.70             |
| A_68_P28072728 | chr11:101087284-101087328                         | NM_007970:458   | Ezh1          | INSIDE                 | 0.377                                                        | 0.195                          | 4464.89            | 872.57             | 0.074                          | 2904.42            | 213.77             |
| A_68_P28072730 | chr11:101087587-101087631                         | NM_007970:156   | Ezh1          | INSIDE                 | 0.581                                                        | 0.635                          | 2717.95            | 1724.72            | 0.369                          | 2156.99            | 795.67             |
| A_68_P20827965 | chr1:173367690-173367734                          | NM_172647:21    | F11r          | INSIDE                 | 0.505                                                        | 0.394                          | 1646.68            | 648.47             | 0.199                          | 1325.54            | 263.38             |
| A_68_P29241611 | chr13:96388009-96388053                           | NM_010169:358   | F2r           | INSIDE                 | 0.446                                                        | 0.403                          | 1512.63            | 609.78             | 0.18                           | 1179.95            | 212.15             |
| A_68_P29241618 | chr13:96388753-96388804                           | NM_010169:-390  | F2r           | PROMOTER               | 0.562                                                        | 0.605                          | 1665.46            | 1007.42            | 0.34                           | 1211.77            | 411.78             |
| A_68_P22478234 | chr3:121426543-121426587                          | NM_010171:110   | F3            | INSIDE                 | 0.589                                                        | 0.527                          | 1882.21            | 992.19             | 0.31                           | 1569.77            | 487.40             |
| A_68_P22478235 | chr3:121426699-121426743                          | NM_010171:266   | F3            | INSIDE                 | 0.618                                                        | 4.292                          | 962.14             | 4129.90            | 2.655                          | 857.04             | 2275.28            |
| A_68_P29630110 | chr14:58444745-58444790                           | NM_198605:233   | F630043A04Rik | INSIDE                 | 0.356                                                        | 0.419                          | 1521.46            | 637.88             | 0.149                          | 1174.29            | 175.21             |
| A_68_P27289092 | chr10:80820623-80820667                           | NM_028657:330   | F630110N24Rik | INSIDE                 | 0.584                                                        | 0.700                          | 1989.85            | 1392.01            | 0.408                          | 1507.20            | 615.46             |
| A_68_P28340238 | chr12:33832153-33832197                           | NR_015602:277   | F730043M19Rik | INSIDE                 | 0.65                                                         | 0.604                          | 1690.78            | 1020.69            | 0.392                          | 1206.41            | 473.15             |
| A_68_P27865444 | chr11:64249527-64249571                           | NR_028445:628   | F930015N05Rik | INSIDE                 | 0.58                                                         | 4.074                          | 1161.35            | 4730.79            | 2.362                          | 1035.29            | 2444.96            |
| A_68_P26168094 | chr8:113917651-113917695                          | NM_178086:49    | Fa2h          | INSIDE                 | 0.59                                                         | 0.622                          | 1446.84            | 899.72             | 0.367                          | 1231.28            | 452.01             |
| A_68_P23227298 | chr4:115690557-115690601                          | NM_010173:-71   | Faah          | PROMOTER               | 0.64                                                         | 3.537                          | 687.61             | 2432.34            | 2.264                          | 611.15             | 1383.39            |
| A_68_P23301443 | chr4:129985869-129985913                          | NM_010174:-131  | Fabp3         | PROMOTER               | 0.371                                                        | 0.431                          | 2388.78            | 1029.20            | 0.16                           | 1856.20            | 297.07             |
| A_68_P23301437 | chr4:129985225-129985269                          | NM_010174:-775  | Fabp3         | PROMOTER               | 0.429                                                        | 0.173                          | 3211.87            | 554.63             | 0.074                          | 2397.13            | 177.50             |
| A_68_P23301445 | chr4:129986078-129986122                          | NM_010174:79    | Fabp3         | INSIDE                 | 0.613                                                        | 0.213                          | 2396.24            | 509.94             | 0.13                           | 1544.72            | 201.42             |
| A_68_P21940379 | chr3:10012439-10012483                            | NM_010634:-145  | Fabp5         | PROMOTER               | 0.17                                                         | 12.762                         | 3940.87            | 50292.20           | 2.164                          | 3406.52            | 7370.36            |
| A_68_P21940380 | chr3:10012548-10012592                            | NM_010634:-35   | Fabp5         | PROMOTER               | 0.613                                                        | 0.167                          | 3118.08            | 522.11             | 0.103                          | 2016.44            | 207.13             |
| A_68_P31948840 | chr19:10257815-10257859                           | NM_146094:459   | Fads1         | INSIDE                 | 0.641                                                        | 0.223                          | 3251.53            | 725.75             | 0.143                          | 2314.52            | 330.98             |
| A_68_P31948062 | chr19:10115784-10115828                           | NM_021890:-231  | Fads3         | PROMOTER               | 0.136                                                        | 53.512                         | 675.28             | 36135.81           | 7.254                          | 538.97             | 3909.75            |
| A_68_P28152627 | chr11:115158906-115158950                         | NM_178035:-68   | Fads6         | DIVERGENT_PROMOTER     | 0.362                                                        | 0.345                          | 1814.15            | 625.62             | 0.125                          | 1389.79            | 173.65             |

| ProbeName      | Target position of probe on CpG island microarray | TargetID         | GeneSymbol | CpG island Description | Ratio of relative methylation (TiO <sub>2</sub> -NP/Vehicle) | Sham group                     |                    |                    | TiO <sub>2</sub> -H group      |                    |                    |
|----------------|---------------------------------------------------|------------------|------------|------------------------|--------------------------------------------------------------|--------------------------------|--------------------|--------------------|--------------------------------|--------------------|--------------------|
|                |                                                   |                  |            |                        |                                                              | Relative methylation (Cy5/Cy3) | Cy3 signal (Input) | Cy5 signal (MeDIP) | Relative methylation (Cy5/Cy3) | Cy3 signal (Input) | Cy5 signal (MeDIP) |
| A_68_P23202060 | chr4:109349261-109349305                          | NM_007983:51     | Faf1       | INSIDE                 | 0.324                                                        | 7.287                          | 1033.60            | 7532.28            | 2.363                          | 916.52             | 2165.59            |
| A_68_P29050433 | chr13:54723497-54723542                           | NM_178397:375    | Faf2       | INSIDE                 | 0.426                                                        | 0.293                          | 1840.87            | 539.38             | 0.125                          | 1359.40            | 169.71             |
| A_68_P29050429 | chr13:54723129-54723173                           | NM_178397:6      | Faf2       | INSIDE                 | 0.54                                                         | 4.661                          | 776.85             | 3620.96            | 2.518                          | 730.93             | 1840.77            |
| A_68_P25289619 | chr7:91754548-91754592                            | NM_010176:-118   | Fah        | PROMOTER               | 0.22                                                         | 1.926                          | 10481.68           | 20189.63           | 0.424                          | 7413.86            | 3139.90            |
| A_68_P24064187 | chr5:125491813-125491857                          | NM_028443:7990   | Fam101a    | INSIDE                 | 0.391                                                        | 12.231                         | 2576.68            | 31514.55           | 4.778                          | 2006.76            | 9587.94            |
| A_68_P27929565 | chr11:75840897-75840941                           | NM_029658:366    | Fam101b    | INSIDE                 | 0.651                                                        | 0.600                          | 903.27             | 542.41             | 0.391                          | 739.44             | 289.27             |
| A_68_P21115867 | chr2:32391280-32391324                            | NM_153560:424    | Fam102a    | INSIDE                 | 0.25                                                         | 11.855                         | 1161.69            | 13772.42           | 2.963                          | 957.39             | 2836.57            |
| A_68_P21115862 | chr2:32390731-32390776                            | NM_153560:-125   | Fam102a    | PROMOTER               | 0.34                                                         | 0.479                          | 1392.49            | 666.87             | 0.163                          | 1056.01            | 171.76             |
| A_68_P21115865 | chr2:32391002-32391046                            | NM_153560:146    | Fam102a    | INSIDE                 | 0.654                                                        | 3.058                          | 1322.22            | 4043.78            | 2                              | 1218.78            | 2437.91            |
| A_68_P25273848 | chr7:88908491-88908535                            | NM_025997:674    | Fam103a1   | INSIDE                 | 0.453                                                        | 9.960                          | 745.57             | 7426.03            | 4.51                           | 643.87             | 2903.97            |
| A_68_P25273840 | chr7:88907783-88907827                            | NM_025997:-34    | Fam103a1   | PROMOTER               | 0.542                                                        | 0.432                          | 1152.24            | 497.87             | 0.234                          | 774.79             | 181.59             |
| A_68_P30093918 | chr15:27611330-27611374                           | NM_198301:-99    | Fam105a    | PROMOTER               | 0.59                                                         | 3.943                          | 616.17             | 2429.72            | 2.328                          | 622.18             | 1448.34            |
| A_68_P30093919 | chr15:27611395-27611439                           | NM_198301:-163   | Fam105a    | PROMOTER               | 0.634                                                        | 13.679                         | 2164.67            | 29610.62           | 8.669                          | 1666.78            | 14449.73           |
| A_68_P30093655 | chr15:27560477-27560521                           | NM_001013792:-50 | Fam105b    | PROMOTER               | 0.217                                                        | 12.921                         | 4138.03            | 53468.42           | 2.802                          | 3611.60            | 10121.13           |
| A_68_P20963945 | chr2:3630790-3630834                              | NM_025626:83     | Fam107b    | INSIDE                 | 0.38                                                         | 5.514                          | 743.35             | 4098.46            | 2.095                          | 703.73             | 1474.48            |
| A_68_P32007552 | chr19:21727793-21727837                           | NM_146096:16     | Fam108b    | INSIDE                 | 0.371                                                        | 12.493                         | 500.87             | 6257.19            | 4.629                          | 385.83             | 1786.09            |
| A_68_P32007551 | chr19:21727608-21727652                           | NM_146096:-168   | Fam108b    | DIVERGENT_PROMOTER     | 0.543                                                        | 2.990                          | 1810.11            | 5411.62            | 1.624                          | 1492.96            | 2424.59            |
| A_68_P25286992 | chr7:91299923-91299967                            | NM_133722:459    | Fam108c    | INSIDE                 | 0.48                                                         | 0.578                          | 833.87             | 481.69             | 0.277                          | 628.97             | 174.41             |
| A_68_P24046892 | chr5:122303021-122303065                          | NM_175474:4006   | Fam109a    | INSIDE                 | 0.629                                                        | 3.215                          | 1662.21            | 5344.82            | 2.022                          | 1128.77            | 2282.66            |
| A_68_P24046891 | chr5:122302921-122302965                          | NM_175474:3906   | Fam109a    | INSIDE                 | 0.656                                                        | 3.181                          | 1148.22            | 3651.93            | 2.087                          | 863.35             | 1802.11            |
| A_68_P24046831 | chr5:122293021-122293065                          | NM_175474:-5994  | Fam109a    | DIVERGENT_PROMOTER     | 0.64                                                         | 5.738                          | 264.38             | 1517.13            | 3.67                           | 240.81             | 883.83             |
| A_68_P30382876 | chr15:82171483-82171527                           | NM_177391:-104   | Fam109b    | DIVERGENT_PROMOTER     | 0.653                                                        | 0.570                          | 939.25             | 535.26             | 0.372                          | 731.21             | 271.91             |
| A_68_P21746889 | chr2:151796098-151796142                          | NM_028666:3590   | Fam110a    | INSIDE                 | 0.397                                                        | 6.316                          | 3931.16            | 24827.43           | 2.51                           | 2729.19            | 6849.39            |
| A_68_P22702205 | chr4:5571555-5571599                              | NM_173426:251    | Fam110b    | INSIDE                 | 0.288                                                        | 20.981                         | 1867.39            | 39178.74           | 6.034                          | 1477.46            | 8915.62            |
| A_68_P22702206 | chr4:5571678-5571722                              | NM_173426:375    | Fam110b    | INSIDE                 | 0.474                                                        | 0.544                          | 2365.07            | 1287.68            | 0.258                          | 1875.84            | 484.11             |
| A_68_P28329059 | chr12:31758655-31758699                           | NM_027828:-156   | Fam110c    | PROMOTER               | 0.285                                                        | 9.323                          | 1356.78            | 12649.50           | 2.653                          | 1128.26            | 2993.70            |
| A_68_P23753715 | chr5:65361156-65361200                            | NM_026667:-135   | Fam114a1   | DIVERGENT_PROMOTER     | 0.305                                                        | 12.213                         | 2772.68            | 33862.73           | 3.725                          | 2407.61            | 8967.16            |
| A_68_P27826023 | chr11:57331958-57332002                           | NM_001168667:166 | Fam114a2   | INSIDE                 | 0.574                                                        | 0.249                          | 3911.32            | 972.79             | 0.143                          | 2759.51            | 394.29             |
| A_68_P28038133 | chr11:95198233-95198277                           | NM_172543:-77    | Fam117a    | PROMOTER               | 0.133                                                        | 1.817                          | 3393.51            | 6167.50            | 0.242                          | 2636.14            | 636.86             |
| A_68_P28038137 | chr11:95198780-95198824                           | NM_172543:471    | Fam117a    | INSIDE                 | 0.212                                                        | 1.782                          | 6413.08            | 11428.75           | 0.377                          | 4390.86            | 1657.53            |
| A_68_P28038138 | chr11:95198892-95198936                           | NM_172543:583    | Fam117a    | INSIDE                 | 0.493                                                        | 0.600                          | 7771.69            | 4665.31            | 0.296                          | 5185.97            | 1534.88            |
| A_68_P20266458 | chr1:59969786-59969830                            | NM_001037725:-41 | Fam117b    | PROMOTER               | 0.253                                                        | 27.529                         | 2144.41            | 59033.32           | 6.953                          | 2043.61            | 14208.35           |
| A_68_P30398340 | chr15:84867516-84867560                           | NM_177067:47     | Fam118a    | INSIDE                 | 0.561                                                        | 3.108                          | 1914.79            | 5951.72            | 1.745                          | 1510.18            | 2634.55            |
| A_68_P26421597 | chr9:35075221-35075265                            | NM_194257:110    | Fam118b    | INSIDE                 | 0.509                                                        | 0.553                          | 1287.25            | 711.76             | 0.282                          | 961.60             | 270.85             |
| A_68_P26421598 | chr9:35075374-35075418                            | NM_175411:-31    | Fam118b    | DIVERGENT_PROMOTER     | 0.353                                                        | 4.898                          | 1139.72            | 5582.50            | 1.729                          | 1021.75            | 1766.46            |
| A_68_P32745112 | chrX:147779006-147779050                          | NM_198105:263    | Fam120c    | INSIDE                 | 0.286                                                        | 6.947                          | 1515.24            | 10526.29           | 1.988                          | 1842.26            | 3662.60            |
| A_68_P32023822 | chr19:24552159-24552210                           | NM_026520:-220   | Fam122a    | PROMOTER               | 0.147                                                        | 2.023                          | 821.81             | 1662.71            | 0.298                          | 595.27             | 177.23             |
| A_68_P32386813 | chrX:50622802-50622846                            | NM_001166365:158 | Fam122b    | INSIDE                 | 0.372                                                        | 19.216                         | 3324.66            | 63888.20           | 7.147                          | 4022.16            | 28746.31           |
| A_68_P29644196 | chr14:60998046-60998090                           | NM_001164705:946 | Fam123a    | INSIDE                 | 0.465                                                        | 0.400                          | 1155.68            | 461.78             | 0.186                          | 933.77             | 173.43             |
| A_68_P29644193 | chr14:60997735-60997779                           | NM_001164705:634 | Fam123a    | INSIDE                 | 0.62                                                         | 5.234                          | 1279.32            | 6696.27            | 3.244                          | 1051.92            | 3412.79            |
| A_68_P32541781 | chrX:92639710-92639754                            | NM_175179:447    | Fam123b    | INSIDE                 | 0.463                                                        | 3.418                          | 1157.33            | 3955.47            | 1.581                          | 1487.14            | 2351.07            |
| A_68_P21124370 | chr2:33742800-33742844                            | NM_175184:644    | Fam125b    | INSIDE                 | 0.099                                                        | 20.037                         | 3217.55            | 64468.49           | 1.984                          | 3456.08            | 6857.89            |
| A_68_P21124367 | chr2:33742451-33742495                            | NM_175184:994    | Fam125b    | INSIDE                 | 0.57                                                         | 0.506                          | 994.72             | 503.51             | 0.289                          | 795.25             | 229.57             |
| A_68_P23539566 | chr5:23536151-23536195                            | NM_053090:329    | Fam126a    | INSIDE                 | 0.516                                                        | 7.790                          | 2376.19            | 18510.80           | 4.018                          | 1989.03            | 7992.75            |
| A_68_P23539565 | chr5:23536003-23536047                            | NM_053090:477    | Fam126a    | INSIDE                 | 0.607                                                        | 0.496                          | 2627.65            | 1302.76            | 0.301                          | 2239.75            | 674.47             |
| A_68_P20259677 | chr1:58643036-58643080                            | NM_172513:119    | Fam126b    | INSIDE                 | 0.371                                                        | 14.373                         | 4736.05            | 68072.24           | 5.339                          | 4052.83            | 21639.03           |



| ProbeName      | Target position of probe on CpG island microarray | TargetID           | GeneSymbol | CpG island Description | Ratio of relative methylation (TiO <sub>2</sub> -NP/Vehicle) | Sham group                     |                    |                    | TiO <sub>2</sub> -H group      |                    |                    |
|----------------|---------------------------------------------------|--------------------|------------|------------------------|--------------------------------------------------------------|--------------------------------|--------------------|--------------------|--------------------------------|--------------------|--------------------|
|                |                                                   |                    |            |                        |                                                              | Relative methylation (Cy5/Cy3) | Cy3 signal (Input) | Cy5 signal (MeDIP) | Relative methylation (Cy5/Cy3) | Cy3 signal (Input) | Cy5 signal (MeDIP) |
| A_68_P25957748 | chr8:74126235-74126279                            | NM_001166213:4712  | Fam129c    | INSIDE                 | 0.448                                                        | 0.255                          | 1969.03            | 502.88             | 0.114                          | 1544.60            | 176.77             |
| A_68_P25957751 | chr8:74126551-74126595                            | NM_001166213:5028  | Fam129c    | INSIDE                 | 0.509                                                        | 4.911                          | 2077.60            | 10202.27           | 2.498                          | 1557.89            | 3890.87            |
| A_68_P25957754 | chr8:74126853-74126897                            | NM_001166213:5330  | Fam129c    | INSIDE                 | 0.354                                                        | 4.288                          | 10947.26           | 46944.34           | 1.516                          | 8094.19            | 12273.11           |
| A_68_P25957750 | chr8:74126449-74126493                            | NM_001166213:4926  | Fam129c    | INSIDE                 | 0.659                                                        | 0.635                          | 1208.97            | 767.13             | 0.418                          | 971.80             | 406.32             |
| A_68_P30589003 | chr16:20693683-20693727                           | NM_133778:-1425    | Fam131a    | PROMOTER               | 0.466                                                        | 0.545                          | 3913.83            | 2132.10            | 0.254                          | 2777.55            | 705.57             |
| A_68_P24397652 | chr6:42273788-42273832                            | NM_001113327:829   | Fam131b    | INSIDE                 | 0.483                                                        | 3.786                          | 4334.81            | 16413.53           | 1.828                          | 3019.67            | 5518.59            |
| A_68_P24397660 | chr6:42274774-42274818                            | NM_001113327:-157  | Fam131b    | PROMOTER               | 0.596                                                        | 3.977                          | 3185.98            | 12671.07           | 2.372                          | 2627.56            | 6232.55            |
| A_68_P23363642 | chr4:140924465-140924509                          | NM_001085513:352   | Fam131c    | INSIDE                 | 0.552                                                        | 0.372                          | 2413.93            | 897.70             | 0.205                          | 1997.32            | 409.73             |
| A_68_P23363727 | chr4:140938341-140938385                          | NM_001085513:14228 | Fam131c    | INSIDE                 | 0.608                                                        | 0.424                          | 1651.05            | 699.35             | 0.258                          | 1396.34            | 359.70             |
| A_68_P20442011 | chr1:93263227-93263272                            | NM_173395:243      | Fam132b    | INSIDE                 | 0.25                                                         | 11.867                         | 2853.82            | 33865.38           | 2.968                          | 2339.24            | 6943.54            |
| A_68_P20442008 | chr1:93262992-93263036                            | NM_173395:8        | Fam132b    | INSIDE                 | 0.642                                                        | 0.443                          | 3617.60            | 1601.55            | 0.284                          | 2724.40            | 774.66             |
| A_68_P24609728 | chr6:86315617-86315661                            | NM_025591:-38      | Fam136a    | PROMOTER               | 0.603                                                        | 0.505                          | 4146.69            | 2093.70            | 0.305                          | 3243.57            | 988.18             |
| A_68_P24609727 | chr6:86315530-86315574                            | NM_025591:-124     | Fam136a    | PROMOTER               | 0.665                                                        | 0.473                          | 6645.97            | 3145.06            | 0.315                          | 5018.17            | 1578.79            |
| A_68_P25644699 | chr8:9770615-9770659                              | NM_173446:387      | Fam155a    | INSIDE                 | 0.393                                                        | 14.544                         | 3210.88            | 46700.39           | 5.709                          | 2772.40            | 15827.16           |
| A_68_P25644704 | chr8:9771350-9771394                              | NM_173446:-349     | Fam155a    | PROMOTER               | 0.51                                                         | 23.890                         | 15314.31           | 365866.00          | 12.186                         | 15118.96           | 184234.70          |
| A_68_P23195768 | chr4:108055890-108055934                          | NM_001099303:42    | Fam159a    | INSIDE                 | 0.546                                                        | 6.363                          | 1832.76            | 11661.22           | 3.475                          | 1518.30            | 5276.65            |
| A_68_P23195767 | chr4:108055814-108055858                          | NM_001099303:118   | Fam159a    | INSIDE                 | 0.614                                                        | 0.717                          | 1519.60            | 1089.25            | 0.44                           | 1152.63            | 506.88             |
| A_68_P25392116 | chr7:112548270-112548314                          | NM_199009:233      | Fam160a2   | INSIDE                 | 0.309                                                        | 7.158                          | 3210.79            | 22983.31           | 2.214                          | 2843.74            | 6296.31            |
| A_68_P25392118 | chr7:112548478-112548522                          | NM_199009:25       | Fam160a2   | INSIDE                 | 0.575                                                        | 4.697                          | 1624.09            | 7628.66            | 2.703                          | 1375.05            | 3716.50            |
| A_68_P21082466 | chr2:26968285-26968329                            | NM_175427:29691    | Fam163b    | INSIDE                 | 0.238                                                        | 6.910                          | 5277.62            | 36466.67           | 1.642                          | 3582.35            | 5882.96            |
| A_68_P21929042 | chr3:7503409-7503453                              | NM_173181:5        | Fam164a    | INSIDE                 | 0.063                                                        | 6.880                          | 10628.77           | 73129.27           | 0.431                          | 7633.56            | 3292.49            |
| A_68_P29661298 | chr14:64055156-64055200                           | NM_177628:-52      | Fam167a    | PROMOTER               | 0.377                                                        | 0.322                          | 1634.56            | 527.04             | 0.121                          | 1412.44            | 171.52             |
| A_68_P25369174 | chr7:107855061-107855105                          | NM_178764:-133     | Fam168a    | PROMOTER               | 0.061                                                        | 8.379                          | 4418.98            | 37025.17           | 0.509                          | 3518.56            | 1791.08            |
| A_68_P25369178 | chr7:107855525-107855569                          | NM_178764:331      | Fam168a    | INSIDE                 | 0.184                                                        | 8.790                          | 9958.72            | 87540.65           | 1.616                          | 7595.81            | 12278.41           |
| A_68_P20140952 | chr1:34899643-34899687                            | NM_001160235:231   | Fam168b    | INSIDE                 | 0.373                                                        | 8.145                          | 1218.00            | 9921.16            | 3.039                          | 1194.06            | 3628.58            |
| A_68_P29249234 | chr13:97841159-97841203                           | NM_001100458:-417  | Fam169a    | PROMOTER               | 0.451                                                        | 0.384                          | 1952.57            | 750.58             | 0.174                          | 1527.91            | 265.13             |
| A_68_P28079628 | chr11:102308536-102308580                         | NM_199200:419      | Fam171a2   | INSIDE                 | 0.542                                                        | 0.247                          | 4370.86            | 1081.57            | 0.134                          | 2985.07            | 400.62             |
| A_68_P28079629 | chr11:102308671-102308715                         | NM_199200:285      | Fam171a2   | INSIDE                 | 0.553                                                        | 3.750                          | 1804.78            | 6768.47            | 2.075                          | 1578.42            | 3274.43            |
| A_68_P28079567 | chr11:102300117-102300165                         | NM_199200:8837     | Fam171a2   | INSIDE                 | 0.564                                                        | 0.501                          | 1165.21            | 583.70             | 0.282                          | 893.59             | 252.26             |
| A_68_P29160014 | chr13:77847868-77847912                           | NM_001163419:-60   | Fam172a    | PROMOTER               | 0.524                                                        | 0.172                          | 3061.04            | 527.12             | 0.09                           | 2252.69            | 203.20             |
| A_68_P31106282 | chr17:25929216-25929260                           | NM_145410:-9       | Fam173a    | PROMOTER               | 0.253                                                        | 16.391                         | 4190.51            | 68686.74           | 4.143                          | 3416.11            | 14153.56           |
| A_68_P25230685 | chr7:80885691-80885735                            | NM_001162532:520   | Fam174b    | INSIDE                 | 0.649                                                        | 0.686                          | 1204.03            | 825.76             | 0.445                          | 963.39             | 428.76             |
| A_68_P23931642 | chr5:101249853-101249897                          | NM_172405:80       | Fam175a    | INSIDE                 | 0.615                                                        | 0.715                          | 1417.59            | 1013.71            | 0.44                           | 1061.25            | 467.05             |
| A_68_P25537310 | chr7:140050852-140050896                          | NM_198017:-33      | Fam175b    | DIVERGENT_PROMOTER     | 0.505                                                        | 5.833                          | 1063.62            | 6203.99            | 2.945                          | 885.03             | 2606.06            |
| A_68_P24586428 | chr6:81991724-81991768                            | NM_145570:125      | Fam176a    | INSIDE                 | 0.653                                                        | 0.443                          | 1613.20            | 714.78             | 0.289                          | 1361.48            | 393.64             |
| A_68_P23278482 | chr4:125826960-125827005                          | NM_172145:1736     | Fam176b    | INSIDE                 | 0.621                                                        | 22.693                         | 1358.59            | 30830.98           | 14.099                         | 1663.80            | 23457.48           |
| A_68_P32135373 | chr19:45005375-45005419                           | NM_001081225:-212  | Fam178a    | PROMOTER               | 0.543                                                        | 4.524                          | 3330.33            | 15065.27           | 2.455                          | 2792.92            | 6856.45            |
| A_68_P32135377 | chr19:45005799-45005843                           | NM_001081225:212   | Fam178a    | INSIDE                 | 0.572                                                        | 0.435                          | 2835.54            | 1232.54            | 0.248                          | 2261.84            | 562.06             |
| A_68_P32135379 | chr19:45006013-45006057                           | NM_001081225:426   | Fam178a    | INSIDE                 | 0.569                                                        | 0.608                          | 1873.04            | 1139.46            | 0.346                          | 1506.04            | 521.50             |
| A_68_P32135378 | chr19:45005914-45005958                           | NM_001081225:328   | Fam178a    | INSIDE                 | 0.663                                                        | 0.576                          | 1457.25            | 838.65             | 0.382                          | 1105.90            | 422.21             |
| A_68_P25328173 | chr7:100228372-100228416                          | NM_021427:6        | Fam181b    | INSIDE                 | 0.196                                                        | 11.151                         | 1094.17            | 12200.94           | 2.183                          | 942.20             | 2057.21            |
| A_68_P25328176 | chr7:100228697-100228741                          | NM_021427:330      | Fam181b    | INSIDE                 | 0.433                                                        | 5.090                          | 2554.05            | 12998.83           | 2.201                          | 2207.70            | 4859.78            |
| A_68_P25328180 | chr7:100229175-100229219                          | NM_021427:808      | Fam181b    | INSIDE                 | 0.421                                                        | 3.729                          | 3081.17            | 11488.85           | 1.569                          | 2465.07            | 3868.07            |
| A_68_P23657737 | chr5:46030747-46030791                            | NM_021416:-28      | Fam184b    | PROMOTER               | 0.625                                                        | 3.001                          | 1599.40            | 4799.13            | 1.875                          | 1384.95            | 2596.92            |
| A_68_P21010977 | chr2:12340687-12340731                            | NM_024185:379      | Fam188a    | INSIDE                 | 0.571                                                        | 0.636                          | 5553.86            | 3530.67            | 0.363                          | 4077.86            | 1480.15            |
| A_68_P25181446 | chr7:72301608-72301652                            | NM_183087:-216     | Fam189a1   | PROMOTER               | 0.561                                                        | 0.280                          | 1872.20            | 523.98             | 0.157                          | 1482.98            | 233.02             |

| ProbeName      | Target position of probe on CpG island microarray | TargetID           | GeneSymbol | CpG island Description | Ratio of relative methylation (TiO <sub>2</sub> -NP/Vehicle) | Sham group                     |                    |                    | TiO <sub>2</sub> -H group      |                    |                    |
|----------------|---------------------------------------------------|--------------------|------------|------------------------|--------------------------------------------------------------|--------------------------------|--------------------|--------------------|--------------------------------|--------------------|--------------------|
|                |                                                   |                    |            |                        |                                                              | Relative methylation (Cy5/Cy3) | Cy3 signal (Input) | Cy5 signal (MeDIP) | Relative methylation (Cy5/Cy3) | Cy3 signal (Input) | Cy5 signal (MeDIP) |
| A_68_P22317741 | chr3:88990976-88991020                            | NM_001014995:3852  | Fam189b    | INSIDE                 | 0.596                                                        | 0.436                          | 1085.81            | 473.64             | 0.26                           | 661.71             | 172.02             |
| A_68_P27856224 | chr11:62692825-62692869                           | NM_026210:-145     | Fam18b     | PROMOTER               | 0.35                                                         | 25.405                         | 28151.52           | 715189.10          | 8.885                          | 30155.74           | 267944.50          |
| A_68_P27856225 | chr11:62692980-62693024                           | NM_026210:11       | Fam18b     | INSIDE                 | 0.504                                                        | 0.285                          | 3339.69            | 950.67             | 0.144                          | 2494.90            | 358.18             |
| A_68_P27856223 | chr11:62692744-62692788                           | NM_026210:-225     | Fam18b     | PROMOTER               | 0.425                                                        | 1.365                          | 2786.51            | 3804.57            | 0.58                           | 2155.59            | 1249.48            |
| A_68_P27856226 | chr11:62693049-62693093                           | NM_026210:79       | Fam18b     | INSIDE                 | 0.573                                                        | 2.689                          | 2213.25            | 5950.44            | 1.541                          | 1760.06            | 2712.63            |
| A_68_P26078518 | chr8:97125424-97125468                            | NM_028221:180      | Fam192a    | INSIDE                 | 0.602                                                        | 4.124                          | 909.70             | 3751.62            | 2.482                          | 785.98             | 1950.67            |
| A_68_P29055901 | chr13:55672343-55672387                           | NM_001162881:-1028 | Fam193b    | PROMOTER               | 0.427                                                        | 7.458                          | 2344.06            | 17481.71           | 3.183                          | 2037.96            | 6486.86            |
| A_68_P28185237 | chr11:120411070-120411114                         | NM_001033231:-51   | Fam195b    | PROMOTER               | 0.454                                                        | 1.329                          | 5275.53            | 7011.11            | 0.604                          | 3292.58            | 1988.11            |
| A_68_P25549531 | chr7:142129256-142129301                          | NM_001143802:835   | Fam196a    | INSIDE                 | 0.25                                                         | 13.841                         | 1371.29            | 18979.54           | 3.462                          | 1024.49            | 3547.17            |
| A_68_P32683852 | chrX:133584183-133584227                          | NM_146261:72       | Fam199x    | INSIDE                 | 0.266                                                        | 21.281                         | 25444.91           | 541499.60          | 5.664                          | 28224.05           | 159849.10          |
| A_68_P30414445 | chr15:87454455-87454499                           | NM_134096:-1183    | Fam19a5    | PROMOTER               | 0.509                                                        | 0.600                          | 1080.33            | 647.93             | 0.305                          | 781.02             | 238.49             |
| A_68_P30347857 | chr15:76199220-76199264                           | NM_021555:-85      | Fam203a    | PROMOTER               | 0.361                                                        | 0.318                          | 2154.47            | 684.48             | 0.115                          | 1724.20            | 197.66             |
| A_68_P28120304 | chr11:109582790-109582834                         | NM_153782:758      | Fam20a     | INSIDE                 | 0.469                                                        | 0.348                          | 1313.73            | 456.84             | 0.163                          | 1048.04            | 170.88             |
| A_68_P24131504 | chr5:139231132-139231176                          | NM_030565:120      | Fam20c     | INSIDE                 | 0.472                                                        | 3.072                          | 2019.17            | 6202.19            | 1.449                          | 1575.46            | 2283.21            |
| A_68_P25960243 | chr8:74743668-74743712                            | NM_026455:62       | Fam32a     | INSIDE                 | 0.394                                                        | 0.612                          | 1753.49            | 1073.79            | 0.241                          | 1543.75            | 372.53             |
| A_68_P26234161 | chr8:125074980-125075024                          | NM_001037298:227   | Fam38a     | INSIDE                 | 0.533                                                        | 5.610                          | 705.29             | 3956.91            | 2.988                          | 629.16             | 1880.10            |
| A_68_P26234162 | chr8:125075132-125075176                          | NM_001037298:75    | Fam38a     | INSIDE                 | 0.542                                                        | 4.820                          | 1042.60            | 5025.81            | 2.614                          | 886.44             | 2317.13            |
| A_68_P26234163 | chr8:125075221-125075265                          | NM_001037298:-13   | Fam38a     | PROMOTER               | 0.533                                                        | 2.617                          | 2088.51            | 5465.30            | 1.396                          | 1774.13            | 2475.82            |
| A_68_P31769415 | chr18:63546129-63546173                           | NM_001039485:687   | Fam38b     | INSIDE                 | 0.377                                                        | 5.784                          | 2318.40            | 13409.99           | 2.18                           | 1857.21            | 4048.60            |
| A_68_P31769416 | chr18:63546211-63546255                           | NM_001039485:605   | Fam38b     | INSIDE                 | 0.51                                                         | 0.554                          | 1248.31            | 691.41             | 0.282                          | 988.60             | 279.15             |
| A_68_P24290981 | chr6:22306235-22306279                            | NM_138587:-175     | Fam3c      | PROMOTER               | 0.473                                                        | 3.360                          | 982.00             | 3299.06            | 1.589                          | 848.23             | 1347.41            |
| A_68_P24329145 | chr6:29866863-29866907                            | NM_001037740:-128  | Fam40b     | PROMOTER               | 0.233                                                        | 20.339                         | 311.84             | 6342.68            | 4.73                           | 288.25             | 1363.28            |
| A_68_P30642683 | chr16:30601337-30601381                           | NM_177632:1550     | Fam43a     | INSIDE                 | 0.216                                                        | 1.538                          | 746.16             | 1147.44            | 0.332                          | 623.80             | 207.21             |
| A_68_P32227328 | chr19:60887531-60887575                           | NM_001167829:80    | Fam45a     | INSIDE                 | 0.627                                                        | 0.248                          | 2126.86            | 527.73             | 0.156                          | 1621.74            | 252.22             |
| A_68_P32227329 | chr19:60887627-60887671                           | NM_001167829:176   | Fam45a     | INSIDE                 | 0.45                                                         | 0.528                          | 879.31             | 463.88             | 0.238                          | 721.80             | 171.45             |
| A_68_P26693191 | chr9:85220481-85220525                            | NM_001160378:229   | Fam46a     | INSIDE                 | 0.505                                                        | 0.491                          | 4516.13            | 2216.78            | 0.248                          | 3357.76            | 832.08             |
| A_68_P26693200 | chr9:85221504-85221548                            | NM_001160379:-769  | Fam46a     | PROMOTER               | 0.348                                                        | 4.078                          | 6944.85            | 28321.09           | 1.421                          | 6358.16            | 9036.06            |
| A_68_P23317811 | chr4:133036049-133036093                          | NM_175307:23       | Fam46b     | INSIDE                 | 0.594                                                        | 0.337                          | 2131.02            | 717.39             | 0.2                            | 1801.93            | 360.16             |
| A_68_P22149162 | chr3:54496870-54496914                            | NM_019995:-134     | Fam48a     | PROMOTER               | 0.226                                                        | 0.179                          | 6128.20            | 1099.31            | 0.04                           | 4294.48            | 173.78             |
| A_68_P28242246 | chr12:12269143-12269187                           | NM_001146119:220   | Fam49a     | INSIDE                 | 0.499                                                        | 1.343                          | 4330.97            | 5817.73            | 0.67                           | 3342.73            | 2239.94            |
| A_68_P30278749 | chr15:63829759-63829803                           | NM_144846:62230    | Fam49b     | INSIDE                 | 0.365                                                        | 9.357                          | 2671.05            | 24993.40           | 3.415                          | 2414.01            | 8244.50            |
| A_68_P30278744 | chr15:63829220-63829264                           | NM_144846:62768    | Fam49b     | INSIDE                 | 0.461                                                        | 4.890                          | 4166.04            | 20370.35           | 2.254                          | 3444.13            | 7762.09            |
| A_68_P30278743 | chr15:63829112-63829156                           | NM_144846:62876    | Fam49b     | INSIDE                 | 0.603                                                        | 0.581                          | 2484.16            | 1443.02            | 0.35                           | 1866.87            | 653.71             |
| A_68_P23590170 | chr5:33972447-33972492                            | NM_178390:-185     | Fam53a     | PROMOTER               | 0.14                                                         | 25.321                         | 7451.91            | 188691.00          | 3.547                          | 7135.63            | 25313.44           |
| A_68_P23590169 | chr5:33972359-33972403                            | NM_178390:-96      | Fam53a     | PROMOTER               | 0.33                                                         | 8.423                          | 5598.11            | 47150.39           | 2.784                          | 4725.71            | 13154.16           |
| A_68_P23590167 | chr5:33972133-33972177                            | NM_178390:130      | Fam53a     | INSIDE                 | 0.509                                                        | 0.549                          | 899.80             | 494.37             | 0.279                          | 617.63             | 172.60             |
| A_68_P25537056 | chr7:140005623-140005667                          | NM_212473:-765     | Fam53b     | PROMOTER               | 0.524                                                        | 5.720                          | 1814.14            | 10377.75           | 2.995                          | 1497.14            | 4484.01            |
| A_68_P23323339 | chr4:134091201-134091245                          | NM_029759:-2555    | Fam54b     | PROMOTER               | 0.5                                                          | 5.261                          | 1489.12            | 7834.89            | 2.632                          | 1374.86            | 3618.83            |
| A_68_P23323334 | chr4:134090623-134090667                          | NM_029759:-1977    | Fam54b     | PROMOTER               | 0.518                                                        | 4.628                          | 337.86             | 1563.74            | 2.397                          | 336.94             | 807.49             |
| A_68_P27930554 | chr11:76015406-76015450                           | NM_027773:-129     | Fam57a     | PROMOTER               | 0.382                                                        | 4.960                          | 3039.67            | 15078.27           | 1.895                          | 2594.73            | 4916.46            |
| A_68_P25502374 | chr7:133952923-133952967                          | NM_026884:-7454    | Fam57b     | DIVERGENT_PROMOTER     | 0.634                                                        | 0.402                          | 1144.30            | 460.11             | 0.255                          | 853.39             | 217.53             |
| A_68_P27945140 | chr11:78565152-78565196                           | NM_197989:57       | Fam58b     | INSIDE                 | 0.594                                                        | 4.234                          | 1038.07            | 4395.58            | 2.514                          | 853.57             | 2145.97            |
| A_68_P31544271 | chr18:21458929-21458973                           | NM_001033445:-310  | Fam59a     | PROMOTER               | 0.218                                                        | 39.778                         | 11525.00           | 458439.70          | 8.682                          | 10709.19           | 92982.43           |
| A_68_P31544268 | chr18:21458551-21458595                           | NM_001033445:68    | Fam59a     | INSIDE                 | 0.43                                                         | 3.842                          | 989.68             | 3802.72            | 1.653                          | 937.54             | 1550.13            |
| A_68_P24942904 | chr6:148895207-148895251                          | NM_019643:-274     | Fam60a     | PROMOTER               | 0.388                                                        | 12.510                         | 2506.49            | 31356.58           | 4.857                          | 2021.03            | 9817.04            |
| A_68_P24942894 | chr6:148893997-148894041                          | NM_019643:936      | Fam60a     | INSIDE                 | 0.543                                                        | 7.344                          | 3137.61            | 23042.87           | 3.989                          | 2769.87            | 11048.82           |

| ProbeName      | Target position of probe on CpG island microarray | TargetID            | GeneSymbol | CpG island Description | Ratio of relative methylation (TiO <sub>2</sub> -NP/Vehicle) | Sham group                     |                    |                    | TiO <sub>2</sub> -H group      |                    |                    |
|----------------|---------------------------------------------------|---------------------|------------|------------------------|--------------------------------------------------------------|--------------------------------|--------------------|--------------------|--------------------------------|--------------------|--------------------|
|                |                                                   |                     |            |                        |                                                              | Relative methylation (Cy5/Cy3) | Cy3 signal (Input) | Cy5 signal (MeDIP) | Relative methylation (Cy5/Cy3) | Cy3 signal (Input) | Cy5 signal (MeDIP) |
| A_68_P24942897 | chr6:148894399-148894443                          | NM_019643:534       | Fam60a     | INSIDE                 | 0.663                                                        | 5.557                          | 1884.51            | 10472.32           | 3.685                          | 2098.64            | 7734.40            |
| A_68_P24942887 | chr6:148893096-148893140                          | NM_019643:1836      | Fam60a     | INSIDE                 | 0.346                                                        | 1.905                          | 3403.85            | 6484.20            | 0.658                          | 2673.38            | 1759.94            |
| A_68_P26617701 | chr9:70504626-70504670                            | NM_172772:333       | Fam63b     | INSIDE                 | 0.359                                                        | 11.632                         | 2112.42            | 24571.98           | 4.173                          | 1729.45            | 7216.24            |
| A_68_P26617706 | chr9:70505115-70505159                            | NM_172772:-155      | Fam63b     | PROMOTER               | 0.654                                                        | 4.778                          | 1834.16            | 8764.04            | 3.124                          | 1653.59            | 5165.14            |
| A_68_P27909076 | chr11:71855740-71855784                           | NM_144526:-241      | Fam64a     | DIVERGENT_PROMOTER     | 0.403                                                        | 9.758                          | 2472.06            | 24122.00           | 3.929                          | 2129.64            | 8367.52            |
| A_68_P23969768 | chr5:108415971-108416015                          | NM_026062:104       | Fam69a     | INSIDE                 | 0.433                                                        | 4.199                          | 4138.24            | 17375.57           | 1.819                          | 3254.02            | 5917.85            |
| A_68_P21080069 | chr2:26483908-26483952                            | NM_019833:-46       | Fam69b     | PROMOTER               | 0.46                                                         | 4.007                          | 1924.36            | 7711.46            | 1.842                          | 1538.61            | 2833.59            |
| A_68_P25087741 | chr7:51751968-51752015                            | NM_028169:34        | Fam71e1    | INSIDE                 | 0.541                                                        | 0.683                          | 1086.63            | 742.31             | 0.37                           | 832.77             | 307.71             |
| A_68_P21102744 | chr2:30220027-30220071                            | NM_175392:194       | Fam73b     | INSIDE                 | 0.363                                                        | 0.465                          | 1380.64            | 642.62             | 0.169                          | 1086.56            | 183.64             |
| A_68_P23314728 | chr4:132478506-132478550                          | NM_001163792:-62    | Fam76a     | PROMOTER               | 0.401                                                        | 0.632                          | 1418.51            | 897.09             | 0.254                          | 1193.84            | 303.06             |
| A_68_P26313788 | chr9:13632555-13632599                            | NM_176836:406       | Fam76b     | INSIDE                 | 0.476                                                        | 3.500                          | 1125.46            | 3939.40            | 1.666                          | 989.72             | 1648.90            |
| A_68_P21113215 | chr2:31939833-31939877                            | NM_175511:-629      | Fam78a     | PROMOTER               | 0.356                                                        | 14.821                         | 1281.97            | 19000.45           | 5.271                          | 1200.35            | 6327.57            |
| A_68_P20802634 | chr1:168931803-168931847                          | NM_001160261:277    | Fam78b     | INSIDE                 | 0.375                                                        | 0.736                          | 2188.79            | 1612.00            | 0.277                          | 1693.90            | 468.44             |
| A_68_P30373737 | chr15:80502053-80502097                           | NM_145986:-202      | Fam83f     | PROMOTER               | 0.386                                                        | 3.749                          | 1979.10            | 7419.20            | 1.448                          | 1944.36            | 2815.05            |
| A_68_P30345428 | chr15:75834117-75834161                           | NM_001168253:5790   | Fam83h     | INSIDE                 | 0.463                                                        | 14.784                         | 2386.94            | 35288.85           | 6.838                          | 2134.93            | 14598.51           |
| A_68_P30261330 | chr15:60655945-60655989                           | NM_001162926:669    | Fam84b     | INSIDE                 | 0.494                                                        | 6.289                          | 838.99             | 5276.14            | 3.105                          | 695.96             | 2161.27            |
| A_68_P30514665 | chr16:5255833-5255877                             | NM_027446:195       | Fam86      | INSIDE                 | 0.6                                                          | 2.888                          | 1452.84            | 4195.36            | 1.734                          | 1226.79            | 2126.84            |
| A_68_P31930484 | chr19:5729356-5729400                             | NM_023166:288       | Fam89b     | INSIDE                 | 0.511                                                        | 0.656                          | 977.68             | 641.18             | 0.335                          | 855.78             | 286.72             |
| A_68_P26129632 | chr8:107165445-107165490                          | NM_026753:161       | Fam96b     | INSIDE                 | 0.412                                                        | 0.284                          | 5994.17            | 1700.66            | 0.117                          | 4153.80            | 485.32             |
| A_68_P26129634 | chr8:107165624-107165668                          | NM_026753:-18       | Fam96b     | PROMOTER               | 0.388                                                        | 0.559                          | 1031.31            | 576.54             | 0.217                          | 801.23             | 173.79             |
| A_68_P21556816 | chr2:117075560-117075604                          | NM_026620:108       | Fam98b     | INSIDE                 | 0.251                                                        | 8.944                          | 1861.55            | 16649.58           | 2.247                          | 1374.48            | 3087.83            |
| A_68_P25025638 | chr7:29940590-29940634                            | NM_001146023:617    | Fam98c     | INSIDE                 | 0.468                                                        | 0.301                          | 3070.87            | 924.42             | 0.141                          | 2357.05            | 332.26             |
| A_68_P31121750 | chr17:28450482-28450526                           | NM_001163819:30     | Fance      | INSIDE                 | 0.582                                                        | 0.426                          | 1874.88            | 798.46             | 0.248                          | 1349.69            | 334.71             |
| A_68_P22869480 | chr4:43023362-43023406                            | NM_001163233:-211   | Fancg      | PROMOTER               | 0.661                                                        | 0.253                          | 2407.11            | 609.76             | 0.167                          | 1746.34            | 292.23             |
| A_68_P25260794 | chr7:86537246-86537290                            | NM_145946:45        | Fanci      | INSIDE                 | 0.541                                                        | 0.209                          | 2239.41            | 469.15             | 0.113                          | 1527.29            | 173.24             |
| A_68_P27662606 | chr11:26287134-26287178                           | NM_025923:73        | Fanc1      | INSIDE                 | 0.341                                                        | 1.445                          | 1848.32            | 2670.27            | 0.492                          | 1490.34            | 733.37             |
| A_68_P28493839 | chr12:66176820-66176864                           | NM_178912:250       | Fancm      | INSIDE                 | 0.658                                                        | 2.915                          | 4426.51            | 12903.88           | 1.918                          | 3598.23            | 6902.67            |
| A_68_P24937826 | chr6:147995940-147995984                          | NM_178797:25        | Far2       | INSIDE                 | 0.611                                                        | 0.491                          | 2931.14            | 1439.22            | 0.3                            | 1926.11            | 577.44             |
| A_68_P29953204 | chr14:121435005-121435049                         | NM_134082:231       | Farp1      | INSIDE                 | 0.518                                                        | 4.890                          | 1259.57            | 6159.59            | 2.534                          | 1088.02            | 2756.73            |
| A_68_P28947125 | chr13:36209443-36209487                           | NM_001039189:185    | Fars2      | INSIDE                 | 0.291                                                        | 9.172                          | 2895.01            | 26552.57           | 2.673                          | 2505.89            | 6697.17            |
| A_68_P29110678 | chr13:68721295-68721339                           | NM_027123:192       | Fastkd3    | INSIDE                 | 0.408                                                        | 5.486                          | 2114.90            | 11603.06           | 2.236                          | 1817.95            | 4065.73            |
| A_68_P25828113 | chr8:46129756-46129800                            | NM_001081286:94217  | Fat1       | INSIDE                 | 0.472                                                        | 4.957                          | 2254.47            | 11175.19           | 2.338                          | 1549.89            | 3622.88            |
| A_68_P25828173 | chr8:46136798-46136846                            | NM_001081286:101261 | Fat1       | INSIDE                 | 0.41                                                         | 3.857                          | 1883.33            | 7263.89            | 1.583                          | 1276.02            | 2019.71            |
| A_68_P25828057 | chr8:46122480-46122524                            | NM_001081286:86941  | Fat1       | INSIDE                 | 0.648                                                        | 2.457                          | 1388.90            | 3413.09            | 1.593                          | 1059.16            | 1686.75            |
| A_68_P22071594 | chr3:38784504-38784548                            | NM_183221:-1335     | Fat4       | PROMOTER               | 0.408                                                        | 0.524                          | 965.34             | 506.22             | 0.214                          | 839.27             | 179.60             |
| A_68_P28157767 | chr11:116029485-116029529                         | NM_172571:-14       | Fbfl       | PROMOTER               | 0.032                                                        | 134.819                        | 287.55             | 38767.85           | 4.339                          | 237.78             | 1031.63            |
| A_68_P30399218 | chr15:85036672-85036716                           | NM_010180:257       | Fbln1      | INSIDE                 | 0.137                                                        | 11.438                         | 2321.81            | 26557.43           | 1.562                          | 2495.85            | 3897.39            |
| A_68_P24637495 | chr6:91162688-91162734                            | NM_001081437:-47    | Fbln2      | PROMOTER               | 0.583                                                        | 0.601                          | 792.13             | 476.38             | 0.351                          | 692.57             | 242.83             |
| A_68_P21621960 | chr2:128718146-128718190                          | NM_024237:28501     | Fbln7      | INSIDE                 | 0.589                                                        | 2.643                          | 1351.49            | 3571.34            | 1.558                          | 1147.92            | 1788.00            |
| A_68_P21621794 | chr2:128690006-128690050                          | NM_024237:361       | Fbln7      | INSIDE                 | 0.307                                                        | 5.675                          | 732.00             | 4154.46            | 1.744                          | 647.16             | 1128.70            |
| A_68_P21603039 | chr2:125331555-125331599                          | NM_007993:598       | Fbn1       | INSIDE                 | 0.338                                                        | 0.654                          | 960.39             | 628.30             | 0.221                          | 785.27             | 173.85             |
| A_68_P31741000 | chr18:58369346-58369390                           | NM_010181:212       | Fbn2       | INSIDE                 | 0.316                                                        | 10.588                         | 2946.85            | 31201.84           | 3.344                          | 2818.31            | 9424.53            |
| A_68_P23979337 | chr5:110807040-110807084                          | NM_028596:9084      | Fbrs1      | INSIDE                 | 0.169                                                        | 11.403                         | 3623.47            | 41317.83           | 1.929                          | 2678.47            | 5166.05            |
| A_68_P23979846 | chr5:110877794-110877838                          | NM_001142642:-294   | Fbrs1      | PROMOTER               | 0.602                                                        | 0.525                          | 2997.12            | 1573.22            | 0.316                          | 2436.30            | 770.39             |
| A_68_P23979845 | chr5:110877631-110877675                          | NM_001142642:-130   | Fbrs1      | PROMOTER               | 0.418                                                        | 0.606                          | 2755.20            | 1671.00            | 0.253                          | 2316.87            | 587.05             |
| A_68_P24793340 | chr6:119429030-119429074                          | NM_133940:-633      | Fbx114     | PROMOTER               | 0.327                                                        | 0.364                          | 5600.41            | 2036.19            | 0.119                          | 3829.51            | 455.14             |

| ProbeName      | Target position of probe on CpG island microarray | TargetID           | GeneSymbol | CpG island Description | Ratio of relative methylation (TiO <sub>2</sub> -NP/Vehicle) | Sham group                     |                    |                    | TiO <sub>2</sub> -H group      |                    |                    |
|----------------|---------------------------------------------------|--------------------|------------|------------------------|--------------------------------------------------------------|--------------------------------|--------------------|--------------------|--------------------------------|--------------------|--------------------|
|                |                                                   |                    |            |                        |                                                              | Relative methylation (Cy5/Cy3) | Cy3 signal (Input) | Cy5 signal (MeDIP) | Relative methylation (Cy5/Cy3) | Cy3 signal (Input) | Cy5 signal (MeDIP) |
| A_68_P32143277 | chr19:46403804-46403848                           | NM_133694:1153     | Fbxl15     | INSIDE                 | 0.642                                                        | 2.993                          | 1531.12            | 4582.41            | 1.921                          | 1269.11            | 2437.81            |
| A_68_P31106388 | chr17:25946298-25946342                           | NM_001164225:291   | Fbxl16     | INSIDE                 | 0.312                                                        | 0.417                          | 1708.39            | 711.60             | 0.13                           | 1415.10            | 184.10             |
| A_68_P31106474 | chr17:25956330-25956374                           | NM_001164225:10323 | Fbxl16     | INSIDE                 | 0.363                                                        | 0.464                          | 1434.61            | 665.43             | 0.168                          | 1020.47            | 171.71             |
| A_68_P31106476 | chr17:25956604-25956648                           | NM_001164225:10597 | Fbxl16     | INSIDE                 | 0.353                                                        | 0.637                          | 969.93             | 618.17             | 0.225                          | 759.15             | 170.72             |
| A_68_P25507036 | chr7:134890617-134890661                          | NM_172748:350      | Fbxl19     | INSIDE                 | 0.591                                                        | 0.572                          | 3218.00            | 1842.02            | 0.338                          | 2254.09            | 762.32             |
| A_68_P25507079 | chr7:134895761-134895805                          | NM_172748:5494     | Fbxl19     | INSIDE                 | 0.643                                                        | 2.990                          | 2144.60            | 6411.55            | 1.922                          | 1698.71            | 3265.60            |
| A_68_P25507025 | chr7:134889380-134889424                          | NM_172748:-886     | Fbxl19     | PROMOTER               | 0.165                                                        | 0.733                          | 2722.86            | 1996.17            | 0.121                          | 1892.05            | 228.45             |
| A_68_P28054695 | chr11:98011746-98011790                           | NM_028149:-838     | Fbxl20     | PROMOTER               | 0.312                                                        | 7.010                          | 1175.04            | 8237.59            | 2.188                          | 1144.24            | 2503.81            |
| A_68_P26593507 | chr9:66359284-66359328                            | NM_175206:3094     | Fbxl22     | INSIDE                 | 0.515                                                        | 0.652                          | 740.79             | 482.77             | 0.335                          | 622.45             | 208.78             |
| A_68_P29863770 | chr14:103498866-103498910                         | NM_015822:-162     | Fbxl3      | PROMOTER               | 0.425                                                        | 4.122                          | 1046.46            | 4313.45            | 1.753                          | 937.25             | 1642.62            |
| A_68_P22777889 | chr4:22284762-22284806                            | NM_172988:73       | Fbxl4      | INSIDE                 | 0.533                                                        | 5.296                          | 1018.61            | 5394.52            | 2.824                          | 974.16             | 2750.59            |
| A_68_P23647569 | chr5:44173172-44173216                            | NM_001159963:194   | Fbxl5      | INSIDE                 | 0.185                                                        | 26.774                         | 3222.13            | 86269.49           | 4.952                          | 2926.02            | 14490.04           |
| A_68_P23647570 | chr5:44173303-44173347                            | NM_001159963:64    | Fbxl5      | INSIDE                 | 0.519                                                        | 8.375                          | 1991.84            | 16682.25           | 4.35                           | 1643.85            | 7151.11            |
| A_68_P30089765 | chr15:26824750-26824795                           | NM_176959:547      | Fbxl7      | INSIDE                 | 0.28                                                         | 1.374                          | 5591.35            | 7682.76            | 0.384                          | 3698.34            | 1420.71            |
| A_68_P26132607 | chr8:107792187-107792231                          | NM_015821:3661     | Fbxl8      | INSIDE                 | 0.585                                                        | 0.561                          | 1743.11            | 978.06             | 0.328                          | 1309.65            | 429.71             |
| A_68_P26132587 | chr8:107788500-107788544                          | NM_015821:-25      | Fbxl8      | DIVERGENT_PROMOTER     | 0.62                                                         | 6.688                          | 818.66             | 5475.04            | 4.149                          | 720.00             | 2986.96            |
| A_68_P25023290 | chr7:29517813-29517857                            | NM_015796:16026    | Fbxo17     | INSIDE                 | 0.418                                                        | 0.402                          | 1521.33            | 611.36             | 0.168                          | 1250.00            | 209.78             |
| A_68_P25023288 | chr7:29517538-29517582                            | NM_015796:15752    | Fbxo17     | INSIDE                 | 0.596                                                        | 0.570                          | 1029.43            | 587.08             | 0.34                           | 832.20             | 283.05             |
| A_68_P21007905 | chr2:11699155-11699199                            | NM_015792:-22      | Fbxo18     | DIVERGENT_PROMOTER     | 0.633                                                        | 0.132                          | 7006.88            | 922.42             | 0.083                          | 4577.66            | 381.74             |
| A_68_P25671122 | chr8:13907695-13907739                            | NM_025785:-89      | Fbxo25     | PROMOTER               | 0.404                                                        | 0.445                          | 1277.51            | 568.09             | 0.18                           | 937.32             | 168.56             |
| A_68_P25023126 | chr7:29478641-29478685                            | NM_001163702:500   | Fbxo27     | INSIDE                 | 0.486                                                        | 0.563                          | 1387.12            | 780.63             | 0.274                          | 1145.25            | 313.41             |
| A_68_P25023124 | chr7:29478378-29478422                            | NM_001163702:238   | Fbxo27     | INSIDE                 | 0.513                                                        | 2.876                          | 2026.53            | 5827.78            | 1.474                          | 1730.28            | 2550.33            |
| A_68_P21486778 | chr2:103867915-103867959                          | NM_020593:-19      | Fbxo3      | PROMOTER               | 0.402                                                        | 0.473                          | 1103.43            | 521.42             | 0.19                           | 925.00             | 175.79             |
| A_68_P30246699 | chr15:58046420-58046464                           | NM_026346:-9       | Fbxo32     | PROMOTER               | 0.4                                                          | 3.789                          | 1331.63            | 5046.20            | 1.517                          | 1085.96            | 1647.00            |
| A_68_P28470857 | chr12:60320041-60320085                           | NM_001033156:408   | Fbxo33     | INSIDE                 | 0.291                                                        | 7.841                          | 1083.99            | 8499.82            | 2.284                          | 889.53             | 2032.13            |
| A_68_P31764311 | chr18:62708175-62708219                           | NM_134136:201      | Fbxo38     | INSIDE                 | 0.417                                                        | 0.158                          | 4975.61            | 787.31             | 0.066                          | 3171.92            | 209.47             |
| A_68_P31764310 | chr18:62708047-62708091                           | NM_134136:329      | Fbxo38     | INSIDE                 | 0.546                                                        | 0.193                          | 2853.89            | 551.85             | 0.106                          | 1924.01            | 203.07             |
| A_68_P31764312 | chr18:62708242-62708286                           | NM_134136:133      | Fbxo38     | INSIDE                 | 0.612                                                        | 5.148                          | 9265.65            | 47703.57           | 3.151                          | 7273.27            | 22920.84           |
| A_68_P27910787 | chr11:72128038-72128082                           | NM_001099688:115   | Fbxo39     | INSIDE                 | 0.623                                                        | 5.361                          | 1370.43            | 7347.23            | 3.338                          | 1159.75            | 3870.82            |
| A_68_P23362414 | chr4:140703695-140703739                          | NM_172518:-120     | Fbxo42     | DIVERGENT_PROMOTER     | 0.598                                                        | 3.749                          | 1176.32            | 4410.39            | 2.243                          | 970.75             | 2177.03            |
| A_68_P23362420 | chr4:140704425-140704469                          | NM_172518:610      | Fbxo42     | INSIDE                 | 0.407                                                        | 0.529                          | 870.36             | 460.47             | 0.215                          | 780.37             | 168.06             |
| A_68_P30137020 | chr15:36094444-36094488                           | NM_001081253:173   | Fbxo43     | INSIDE                 | 0.341                                                        | 16.880                         | 2899.25            | 48937.93           | 5.76                           | 2384.82            | 13736.90           |
| A_68_P23392752 | chr4:147534277-147534321                          | NM_001161852:-125  | Fbxo44     | DIVERGENT_PROMOTER     | 0.125                                                        | 0.378                          | 6289.52            | 2374.87            | 0.047                          | 3934.69            | 186.45             |
| A_68_P24991559 | chr7:19703647-19703691                            | NM_175530:-1539    | Fbxo46     | PROMOTER               | 0.385                                                        | 6.037                          | 1110.06            | 6701.04            | 2.325                          | 964.72             | 2243.29            |
| A_68_P28053229 | chr11:97745535-97745579                           | NM_001081435:88    | Fbxo47     | PROMOTER               | 0.361                                                        | 19.323                         | 5566.02            | 107552.90          | 6.969                          | 5310.18            | 37007.41           |
| A_68_P28053223 | chr11:97744951-97744995                           | NM_001081435:496   | Fbxo47     | INSIDE                 | 0.442                                                        | 33.030                         | 5115.90            | 168978.20          | 14.597                         | 6474.28            | 94505.26           |
| A_68_P23392700 | chr4:147525826-147525870                          | NM_001163704:186   | Fbxo6      | INSIDE                 | 0.296                                                        | 13.030                         | 4591.60            | 59830.66           | 3.861                          | 3966.95            | 15318.05           |
| A_68_P27311667 | chr10:85484851-85484895                           | NM_153195:199      | Fbxo7      | INSIDE                 | 0.352                                                        | 1.491                          | 989.79             | 1476.06            | 0.524                          | 973.95             | 510.68             |
| A_68_P26658155 | chr9:77956059-77956103                            | NM_023605:383      | Fbxo9      | INSIDE                 | 0.27                                                         | 27.969                         | 3822.62            | 106914.40          | 7.546                          | 3316.71            | 25029.24           |
| A_68_P26658154 | chr9:77955972-77956016                            | NM_023605:469      | Fbxo9      | INSIDE                 | 0.462                                                        | 0.556                          | 1642.13            | 913.02             | 0.257                          | 1249.46            | 321.24             |
| A_68_P26658159 | chr9:77956440-77956484                            | NM_023605:1        | Fbxo9      | INSIDE                 | 0.643                                                        | 5.768                          | 1187.16            | 6847.55            | 3.707                          | 997.51             | 3698.27            |
| A_68_P22293161 | chr3:84619085-84619129                            | NM_001177773:-392  | Fbxw7      | PROMOTER               | 0.128                                                        | 43.147                         | 2671.49            | 115267.70          | 5.537                          | 2901.05            | 16064.09           |
| A_68_P26023482 | chr8:87584261-87584305                            | NM_026791:265      | Fbxw9      | INSIDE                 | 0.528                                                        | 0.671                          | 2283.54            | 1532.81            | 0.354                          | 1708.04            | 604.89             |
| A_68_P20826002 | chr1:172995322-172995366                          | NM_010188:-5810    | Fcgr3      | PROMOTER               | 0.254                                                        | 0.483                          | 36209.92           | 17487.70           | 0.123                          | 24470.33           | 3005.28            |
| A_68_P20825999 | chr1:172994938-172994982                          | NM_010188:-5426    | Fcgr3      | PROMOTER               | 0.332                                                        | 0.110                          | 58296.28           | 6397.06            | 0.036                          | 37505.03           | 1368.36            |
| A_68_P20825996 | chr1:172994474-172994518                          | NM_010188:-4962    | Fcgr3      | PROMOTER               | 0.44                                                         | 0.391                          | 12476.45           | 4878.90            | 0.172                          | 9152.24            | 1575.82            |

| ProbeName      | Target position of probe on CpG island microarray | TargetID           | GeneSymbol | CpG island Description | Ratio of relative methylation (TiO <sub>2</sub> -NP/Vehicle) | Sham group                     |                    |                    | TiO <sub>2</sub> -H group      |                    |                    |
|----------------|---------------------------------------------------|--------------------|------------|------------------------|--------------------------------------------------------------|--------------------------------|--------------------|--------------------|--------------------------------|--------------------|--------------------|
|                |                                                   |                    |            |                        |                                                              | Relative methylation (Cy5/Cy3) | Cy3 signal (Input) | Cy5 signal (MeDIP) | Relative methylation (Cy5/Cy3) | Cy3 signal (Input) | Cy5 signal (MeDIP) |
| A_68_P20825998 | chr1:172994760-172994804                          | NM_010188:-5248    | Fcgr3      | PROMOTER               | 0.636                                                        | 0.206                          | 7929.36            | 1637.27            | 0.131                          | 6673.30            | 876.07             |
| A_68_P20826006 | chr1:172995780-172995824                          | NM_010188:-6268    | Fcgr3      | PROMOTER               | 0.661                                                        | 0.465                          | 14721.57           | 6849.05            | 0.308                          | 11937.52           | 3671.06            |
| A_68_P20825994 | chr1:172994223-172994267                          | NM_010188:-4710    | Fcgr3      | PROMOTER               | 0.548                                                        | 1.327                          | 20433.59           | 27106.95           | 0.727                          | 14810.87           | 10769.90           |
| A_68_P29259683 | chr13:99585179-99585223                           | NM_172591:204      | Fcho2      | INSIDE                 | 0.487                                                        | 9.015                          | 1145.03            | 10322.85           | 4.389                          | 1056.32            | 4636.48            |
| A_68_P25371475 | chr7:108256912-108256956                          | NM_001146010:-354  | Fchsd2     | PROMOTER               | 0.437                                                        | 5.134                          | 1834.54            | 9419.39            | 2.245                          | 1509.14            | 3388.41            |
| A_68_P25371480 | chr7:108257652-108257696                          | NM_001146010:386   | Fchsd2     | INSIDE                 | 0.501                                                        | 0.090                          | 6497.46            | 582.30             | 0.045                          | 3805.06            | 170.94             |
| A_68_P22317217 | chr3:88905983-88906028                            | NM_134469:-138     | Fdps       | PROMOTER               | 0.541                                                        | 0.251                          | 1784.33            | 448.65             | 0.136                          | 1285.31            | 174.78             |
| A_68_P26512426 | chr9:51771455-51771499                            | NM_007996:162      | Fdx1       | INSIDE                 | 0.578                                                        | 5.063                          | 1862.15            | 9427.74            | 2.925                          | 1630.65            | 4769.98            |
| A_68_P26572466 | chr9:62659190-62659234                            | NM_010193:243      | Fem1b      | INSIDE                 | 0.614                                                        | 2.819                          | 1555.36            | 4384.68            | 1.73                           | 1209.32            | 2092.41            |
| A_68_P26572467 | chr9:62659271-62659315                            | NM_010193:163      | Fem1b      | INSIDE                 | 0.334                                                        | 4.991                          | 1054.19            | 5261.81            | 1.668                          | 939.05             | 1566.66            |
| A_68_P31677413 | chr18:46685542-46685586                           | NM_173423:61       | Fem1c      | INSIDE                 | 0.446                                                        | 5.211                          | 1702.60            | 8872.81            | 2.324                          | 1472.98            | 3422.83            |
| A_68_P31677409 | chr18:46684937-46684981                           | NM_173423:667      | Fem1c      | INSIDE                 | 0.621                                                        | 0.254                          | 1911.12            | 485.40             | 0.158                          | 1233.54            | 194.61             |
| A_68_P20351049 | chr1:74932092-74932136                            | NM_153111:-132     | Fev        | PROMOTER               | 0.521                                                        | 0.595                          | 3267.02            | 1943.39            | 0.31                           | 2377.94            | 736.61             |
| A_68_P20351021 | chr1:74929129-74929173                            | NM_153111:2832     | Fev        | INSIDE                 | 0.619                                                        | 5.870                          | 1780.93            | 10454.00           | 3.635                          | 1496.83            | 5440.77            |
| A_68_P20351017 | chr1:74928629-74928673                            | NM_153111:3332     | Fev        | INSIDE                 | 0.359                                                        | 1.369                          | 3706.49            | 5073.77            | 0.492                          | 2667.29            | 1311.92            |
| A_68_P20351050 | chr1:74932235-74932279                            | NM_153111:-274     | Fev        | PROMOTER               | 0.341                                                        | 0.751                          | 4934.27            | 3705.15            | 0.256                          | 3228.15            | 825.92             |
| A_68_P31371532 | chr17:78817452-78817496                           | NM_199448:-31      | Fez2       | PROMOTER               | 0.486                                                        | 9.016                          | 7718.43            | 69588.63           | 4.384                          | 6124.71            | 26847.78           |
| A_68_P31371531 | chr17:78817355-78817399                           | NM_199448:67       | Fez2       | INSIDE                 | 0.55                                                         | 0.538                          | 987.46             | 531.69             | 0.296                          | 837.68             | 247.98             |
| A_68_P24295389 | chr6:23198493-23198537                            | NM_028462:-250     | Fezf1      | PROMOTER               | 0.412                                                        | 4.627                          | 2155.94            | 9974.80            | 1.905                          | 1753.19            | 3339.79            |
| A_68_P24295432 | chr6:23203617-23203661                            | NM_028462:-5374    | Fezf1      | PROMOTER               | 0.476                                                        | 10.452                         | 2245.73            | 23473.24           | 4.97                           | 2002.41            | 9952.80            |
| A_68_P29410675 | chr14:13178814-13178858                           | NM_080433:-457     | Fezf2      | PROMOTER               | 0.217                                                        | 14.766                         | 1197.16            | 17677.36           | 3.211                          | 1038.89            | 3335.93            |
| A_68_P32743933 | chrX:147481461-147481505                          | NM_008001:-293     | Fgd1       | PROMOTER               | 0.467                                                        | 6.866                          | 2226.50            | 15287.65           | 3.204                          | 2542.07            | 8145.78            |
| A_68_P29369781 | chr13:119503243-119503287                         | NM_008002:-241     | Fgf10      | PROMOTER               | 0.258                                                        | 14.292                         | 7312.58            | 104508.50          | 3.69                           | 6227.51            | 22977.91           |
| A_68_P30630415 | chr16:28446508-28446552                           | NM_183064:-1217    | Fgf12      | PROMOTER               | 0.66                                                         | 2.535                          | 2411.53            | 6113.21            | 1.674                          | 2134.53            | 3572.38            |
| A_68_P30630419 | chr16:28446947-28446991                           | NM_183064:-1655    | Fgf12      | PROMOTER               | 0.444                                                        | 4.544                          | 531.93             | 2417.14            | 2.017                          | 496.50             | 1001.39            |
| A_68_P32408601 | chrX:56388072-56388116                            | NM_010200:-481     | Fgf13      | PROMOTER               | 0.618                                                        | 3.064                          | 965.40             | 2958.24            | 1.895                          | 1082.71            | 2051.70            |
| A_68_P25609917 | chr7:152082446-152082490                          | NM_008003:32       | Fgf15      | INSIDE                 | 0.542                                                        | 4.215                          | 3006.87            | 12673.36           | 2.283                          | 2528.97            | 5772.87            |
| A_68_P27278709 | chr10:79217725-79217769                           | NM_023304:-117     | Fgf22      | DIVERGENT_PROMOTER     | 0.197                                                        | 2.856                          | 5628.12            | 16071.45           | 0.562                          | 3723.45            | 2090.72            |
| A_68_P24830596 | chr6:127030399-127030443                          | NM_022657:7501     | Fgf23      | INSIDE                 | 0.239                                                        | 2.276                          | 1785.47            | 6339.70            | 0.543                          | 2304.56            | 1251.49            |
| A_68_P25609544 | chr7:152024886-152024930                          | NM_008007:392      | Fgf3       | INSIDE                 | 0.315                                                        | 6.684                          | 1469.15            | 9819.30            | 2.107                          | 1237.72            | 2607.39            |
| A_68_P25609547 | chr7:152025243-152025287                          | NM_008007:748      | Fgf3       | INSIDE                 | 0.534                                                        | 0.377                          | 1970.21            | 742.29             | 0.201                          | 1402.79            | 282.08             |
| A_68_P25609683 | chr7:152047109-152047153                          | NM_010202:-160     | Fgf4       | PROMOTER               | 0.364                                                        | 0.234                          | 2931.27            | 686.16             | 0.085                          | 2058.54            | 175.57             |
| A_68_P25609686 | chr7:152047482-152047526                          | NM_010202:214      | Fgf4       | INSIDE                 | 0.478                                                        | 11.583                         | 1243.44            | 14402.95           | 5.536                          | 1073.19            | 5941.27            |
| A_68_P25609690 | chr7:152047867-152047911                          | NM_010202:598      | Fgf4       | INSIDE                 | 0.56                                                         | 0.396                          | 1532.94            | 607.38             | 0.222                          | 1150.17            | 255.40             |
| A_68_P23917031 | chr5:98683201-98683245                            | NM_010203:20       | Fgf5       | INSIDE                 | 0.281                                                        | 0.476                          | 1898.36            | 902.96             | 0.133                          | 1257.93            | 167.89             |
| A_68_P32140182 | chr19:45811402-45811446                           | NM_001166361:-5950 | Fgf8       | INSIDE                 | 0.195                                                        | 18.935                         | 2505.67            | 47445.07           | 3.686                          | 2352.52            | 8671.54            |
| A_68_P29631462 | chr14:58689892-58689936                           | NM_013518:-1608    | Fgf9       | PROMOTER               | 0.159                                                        | 16.795                         | 1021.85            | 17161.86           | 2.663                          | 893.96             | 2380.35            |
| A_68_P29631499 | chr14:58694324-58694368                           | NM_013518:2824     | Fgf9       | INSIDE                 | 0.278                                                        | 7.191                          | 3328.63            | 23936.56           | 2                              | 2711.75            | 5423.60            |
| A_68_P29631513 | chr14:58695681-58695725                           | NM_013518:4180     | Fgf9       | INSIDE                 | 0.478                                                        | 0.387                          | 1645.55            | 636.95             | 0.185                          | 1351.33            | 250.08             |
| A_68_P29631470 | chr14:58691022-58691066                           | NM_013518:-478     | Fgf9       | PROMOTER               | 0.486                                                        | 14.271                         | 1657.06            | 23648.57           | 6.937                          | 1402.36            | 9728.70            |
| A_68_P29631503 | chr14:58694761-58694806                           | NM_013518:3261     | Fgf9       | INSIDE                 | 0.543                                                        | 3.851                          | 4352.72            | 16762.62           | 2.092                          | 2972.15            | 6216.44            |
| A_68_P29631498 | chr14:58694189-58694233                           | NM_013518:2688     | Fgf9       | INSIDE                 | 0.556                                                        | 0.092                          | 5259.79            | 484.26             | 0.051                          | 3418.86            | 174.99             |
| A_68_P29631505 | chr14:58694946-58694991                           | NM_013518:3446     | Fgf9       | INSIDE                 | 0.525                                                        | 3.258                          | 1755.12            | 5718.72            | 1.71                           | 1436.89            | 2456.79            |
| A_68_P32092666 | chr19:36993233-36993277                           | NM_028263:835      | Fgfbp3     | INSIDE                 | 0.248                                                        | 16.944                         | 1816.27            | 30774.48           | 4.208                          | 1718.49            | 7231.51            |
| A_68_P32092668 | chr19:36993413-36993457                           | NM_028263:655      | Fgfbp3     | INSIDE                 | 0.409                                                        | 7.580                          | 1133.08            | 8588.41            | 3.103                          | 1013.98            | 3145.97            |
| A_68_P32092667 | chr19:36993325-36993369                           | NM_028263:743      | Fgfbp3     | INSIDE                 | 0.617                                                        | 4.072                          | 762.42             | 3104.58            | 2.511                          | 632.75             | 1588.68            |

| ProbeName      | Target position of probe on CpG island microarray | TargetID          | GeneSymbol | CpG island Description | Ratio of relative methylation (TiO <sub>2</sub> -NP/Vehicle) | Sham group                     |                    |                    | TiO <sub>2</sub> -H group      |                    |                    |
|----------------|---------------------------------------------------|-------------------|------------|------------------------|--------------------------------------------------------------|--------------------------------|--------------------|--------------------|--------------------------------|--------------------|--------------------|
|                |                                                   |                   |            |                        |                                                              | Relative methylation (Cy5/Cy3) | Cy3 signal (Input) | Cy5 signal (MeDIP) | Relative methylation (Cy5/Cy3) | Cy3 signal (Input) | Cy5 signal (MeDIP) |
| A_68_P25727484 | chr8:26629202-26629246                            | NM_001079908:-19  | Fgfr1      | PROMOTER               | 0.302                                                        | 7.807                          | 1501.83            | 11724.49           | 2.358                          | 1291.85            | 3045.73            |
| A_68_P25520723 | chr7:137409825-137409869                          | NM_010207:476     | Fgfr2      | INSIDE                 | 0.633                                                        | 3.088                          | 996.99             | 3078.95            | 1.955                          | 844.51             | 1651.22            |
| A_68_P23590785 | chr5:34065022-34065066                            | NM_001163216:90   | Fgfr3      | INSIDE                 | 0.571                                                        | 2.962                          | 1572.73            | 4657.66            | 1.691                          | 1320.28            | 2232.52            |
| A_68_P29053522 | chr13:55254151-55254195                           | NM_008011:-6      | Fgfr4      | PROMOTER               | 0.211                                                        | 21.830                         | 1839.54            | 40156.61           | 4.596                          | 1586.41            | 7290.99            |
| A_68_P29053525 | chr13:55254569-55254613                           | NM_008011:412     | Fgfr4      | INSIDE                 | 0.635                                                        | 0.537                          | 3946.66            | 2120.52            | 0.341                          | 2875.49            | 980.71             |
| A_68_P23973608 | chr5:109123109-109123155                          | NM_001164259:-115 | Fgfr1      | PROMOTER               | 0.45                                                         | 0.348                          | 6038.26            | 2101.15            | 0.157                          | 4201.76            | 658.13             |
| A_68_P23973612 | chr5:109123736-109123780                          | NM_001164259:511  | Fgfr1      | INSIDE                 | 0.208                                                        | 0.641                          | 1764.96            | 1130.69            | 0.133                          | 1300.31            | 173.33             |
| A_68_P23973609 | chr5:109123219-109123263                          | NM_001164259:-7   | Fgfr1      | PROMOTER               | 0.425                                                        | 0.705                          | 2032.62            | 1432.90            | 0.299                          | 1675.83            | 501.58             |
| A_68_P20849149 | chr1:177555403-177555447                          | NM_010209:342     | Fh1        | INSIDE                 | 0.28                                                         | 9.617                          | 1870.38            | 17987.20           | 2.697                          | 1757.70            | 4741.27            |
| A_68_P20849151 | chr1:177555721-177555765                          | NM_010209:24      | Fh1        | INSIDE                 | 0.346                                                        | 6.839                          | 6751.95            | 46174.11           | 2.369                          | 4962.41            | 11758.03           |
| A_68_P20849150 | chr1:177555582-177555626                          | NM_010209:162     | Fh1        | INSIDE                 | 0.567                                                        | 0.579                          | 1485.54            | 860.23             | 0.329                          | 1149.69            | 377.70             |
| A_68_P29403726 | chr14:11994369-11994413                           | NM_010210:156     | Fhit       | INSIDE                 | 0.288                                                        | 9.744                          | 6040.88            | 58859.64           | 2.806                          | 4740.65            | 13302.99           |
| A_68_P20187367 | chr1:43220695-43220739                            | NM_010212:90      | Fhl2       | INSIDE                 | 0.28                                                         | 20.256                         | 1252.61            | 25373.45           | 5.669                          | 1120.49            | 6351.75            |
| A_68_P20187366 | chr1:43220621-43220665                            | NM_010212:164     | Fhl2       | INSIDE                 | 0.479                                                        | 3.951                          | 782.01             | 3090.09            | 1.892                          | 639.71             | 1210.40            |
| A_68_P23269776 | chr4:124378137-124378181                          | NM_010213:216     | Fhl3       | INSIDE                 | 0.363                                                        | 6.795                          | 689.38             | 4684.20            | 2.467                          | 686.39             | 1693.16            |
| A_68_P23269774 | chr4:124377782-124377826                          | NM_010213:-138    | Fhl3       | DIVERGENT_PROMOTER     | 0.457                                                        | 0.220                          | 3540.88            | 777.65             | 0.1                            | 2581.36            | 258.87             |
| A_68_P23269775 | chr4:124377958-124378002                          | NM_010213:38      | Fhl3       | INSIDE                 | 0.649                                                        | 0.560                          | 3094.54            | 1733.12            | 0.364                          | 2503.46            | 910.38             |
| A_68_P31561526 | chr18:24868000-24868044                           | NM_175276:77      | Fhod3      | INSIDE                 | 0.504                                                        | 9.659                          | 1495.34            | 14443.42           | 4.873                          | 1332.27            | 6491.52            |
| A_68_P21111665 | chr2:31702261-31702305                            | NM_178887:-757    | Fibcd1     | PROMOTER               | 0.559                                                        | 0.460                          | 2461.32            | 1131.23            | 0.257                          | 1778.32            | 457.06             |
| A_68_P21111657 | chr2:31701223-31701267                            | NM_178887:281     | Fibcd1     | INSIDE                 | 0.356                                                        | 0.656                          | 878.42             | 576.53             | 0.234                          | 735.34             | 171.83             |
| A_68_P24607724 | chr6:85978997-85979041                            | NM_012013:11834   | Figla      | DOWNSTREAM             | 0.508                                                        | 0.313                          | 1453.61            | 455.21             | 0.159                          | 1048.16            | 166.87             |
| A_68_P30786987 | chr16:57549528-57549572                           | NM_001177871:196  | Filip11    | INSIDE                 | 0.192                                                        | 14.652                         | 588.94             | 8629.19            | 2.813                          | 533.66             | 1500.92            |
| A_68_P23803966 | chr5:74931407-74931451                            | NM_001159573:-78  | Fip111     | DIVERGENT_PROMOTER     | 0.541                                                        | 0.307                          | 2430.82            | 746.56             | 0.166                          | 2079.66            | 345.32             |
| A_68_P21812643 | chr2:163298309-163298353                          | NM_173397:35      | Fitm2      | INSIDE                 | 0.585                                                        | 0.612                          | 2173.06            | 1330.33            | 0.358                          | 1844.42            | 660.13             |
| A_68_P24951534 | chr7:4960187-4960231                              | NM_001110330:4636 | Fiz1       | INSIDE                 | 0.632                                                        | 3.740                          | 833.43             | 3117.02            | 2.364                          | 842.17             | 1991.29            |
| A_68_P21477090 | chr2:102291323-102291367                          | NM_010218:605     | Fjx1       | INSIDE                 | 0.337                                                        | 1.619                          | 1396.55            | 2260.70            | 0.545                          | 1192.27            | 649.58             |
| A_68_P21744416 | chr2:151368526-151368570                          | NM_008019:314     | Fkbp1a     | INSIDE                 | 0.46                                                         | 0.398                          | 1157.71            | 460.21             | 0.183                          | 948.27             | 173.29             |
| A_68_P31937108 | chr19:7054737-7054781                             | NM_008020:172     | Fkbp2      | INSIDE                 | 0.464                                                        | 5.469                          | 4058.24            | 22194.95           | 2.537                          | 3421.09            | 8678.41            |
| A_68_P31937106 | chr19:7054484-7054528                             | NM_008020:424     | Fkbp2      | INSIDE                 | 0.643                                                        | 0.341                          | 4590.59            | 1564.47            | 0.219                          | 3043.90            | 666.89             |
| A_68_P31937105 | chr19:7054354-7054400                             | NM_008020:554     | Fkbp2      | INSIDE                 | 0.27                                                         | 1.616                          | 1745.97            | 2821.14            | 0.436                          | 1576.23            | 686.47             |
| A_68_P31937107 | chr19:7054605-7054649                             | NM_008020:304     | Fkbp2      | INSIDE                 | 0.102                                                        | 1.354                          | 12555.98           | 17002.83           | 0.138                          | 8584.28            | 1184.61            |
| A_68_P31937111 | chr19:7054987-7055031                             | NM_001166368:-57  | Fkbp2      | PROMOTER               | 0.52                                                         | 2.949                          | 1068.59            | 3151.34            | 1.535                          | 930.90             | 1428.74            |
| A_68_P24477004 | chr6:56782166-56782210                            | NM_012056:136     | Fkbp9      | INSIDE                 | 0.338                                                        | 8.196                          | 2179.75            | 17866.11           | 2.772                          | 1869.07            | 5181.68            |
| A_68_P26406146 | chr9:32348818-32348862                            | NM_008026:113     | Fli1       | INSIDE                 | 0.477                                                        | 0.471                          | 3707.44            | 1746.18            | 0.225                          | 2626.42            | 590.06             |
| A_68_P26406147 | chr9:32348923-32348967                            | NM_008026:9       | Fli1       | INSIDE                 | 0.53                                                         | 16.047                         | 1716.14            | 27538.81           | 8.502                          | 1468.95            | 12488.89           |
| A_68_P26406144 | chr9:32348552-32348596                            | NM_008026:379     | Fli1       | INSIDE                 | 0.506                                                        | 0.553                          | 1063.49            | 587.86             | 0.28                           | 777.05             | 217.54             |
| A_68_P29386047 | chr14:8650522-8650566                             | NM_134080:74      | Flnb       | INSIDE                 | 0.35                                                         | 0.405                          | 1618.21            | 655.09             | 0.142                          | 1204.56            | 170.50             |
| A_68_P31161104 | chr17:35960060-35960104                           | NM_008027:-219    | Flot1      | PROMOTER               | 0.542                                                        | 10.115                         | 1427.69            | 14440.63           | 5.482                          | 1280.98            | 7022.68            |
| A_68_P28656384 | chr12:96934105-96934150                           | NM_201518:3692    | Flrt2      | INSIDE                 | 0.244                                                        | 10.932                         | 1259.32            | 13767.25           | 2.672                          | 1153.19            | 3081.73            |
| A_68_P24175500 | chr5:148537455-148537499                          | NM_010228:88      | Flt1       | INSIDE                 | 0.408                                                        | 4.458                          | 2363.82            | 10536.99           | 1.819                          | 2002.69            | 3643.33            |
| A_68_P24175497 | chr5:148537110-148537154                          | NM_010228:432     | Flt1       | INSIDE                 | 0.652                                                        | 0.410                          | 2412.06            | 989.49             | 0.267                          | 1817.92            | 485.97             |
| A_68_P24173496 | chr5:148211773-148211817                          | NM_010229:271     | Flt3       | INSIDE                 | 0.561                                                        | 3.894                          | 4934.58            | 19216.54           | 2.184                          | 3700.56            | 8083.11            |
| A_68_P27783947 | chr11:49447973-49448018                           | NM_008029:24815   | Flt4       | INSIDE                 | 0.199                                                        | 1.884                          | 2592.80            | 4885.70            | 0.375                          | 1879.71            | 705.30             |
| A_68_P20842596 | chr1:176433328-176433372                          | NM_019445:1395    | Fmn2       | INSIDE                 | 0.514                                                        | 0.625                          | 3560.51            | 2226.01            | 0.321                          | 2499.17            | 803.37             |
| A_68_P32441102 | chrX:65932146-65932191                            | NM_008031:439     | Fmr1       | INSIDE                 | 0.061                                                        | 79.612                         | 863.93             | 68779.64           | 4.838                          | 1100.11            | 5322.37            |
| A_68_P20332286 | chr1:71699573-71699617                            | NM_010233:151     | Fnl1       | INSIDE                 | 0.476                                                        | 0.454                          | 1214.83            | 551.95             | 0.216                          | 881.96             | 190.84             |

| ProbeName      | Target position of probe on CpG island microarray | TargetID          | GeneSymbol | CpG island Description | Ratio of relative methylation (TiO <sub>2</sub> -NP/Vehicle) | Sham group                     |                    |                    | TiO <sub>2</sub> -H group      |                    |                    |
|----------------|---------------------------------------------------|-------------------|------------|------------------------|--------------------------------------------------------------|--------------------------------|--------------------|--------------------|--------------------------------|--------------------|--------------------|
|                |                                                   |                   |            |                        |                                                              | Relative methylation (Cy5/Cy3) | Cy3 signal (Input) | Cy5 signal (MeDIP) | Relative methylation (Cy5/Cy3) | Cy3 signal (Input) | Cy5 signal (MeDIP) |
| A_68_P21107218 | chr2:30997212-30997256                            | NM_001038700:294  | Fnbp1      | INSIDE                 | 0.663                                                        | 3.485                          | 1159.37            | 4040.31            | 2.312                          | 996.38             | 2303.18            |
| A_68_P21107216 | chr2:30997021-30997065                            | NM_001038700:486  | Fnbp1      | INSIDE                 | 0.663                                                        | 2.122                          | 2031.14            | 4310.82            | 1.407                          | 1620.01            | 2278.54            |
| A_68_P22483663 | chr3:122321938-122321982                          | NM_001114665:625  | Fnbp11     | INSIDE                 | 0.389                                                        | 15.921                         | 1039.67            | 16552.94           | 6.196                          | 820.63             | 5084.25            |
| A_68_P22483665 | chr3:122322229-122322273                          | NM_001114665:335  | Fnbp11     | INSIDE                 | 0.501                                                        | 5.207                          | 1088.81            | 5669.31            | 2.609                          | 988.41             | 2579.20            |
| A_68_P29713891 | chr14:73109647-73109691                           | NM_207636:142     | Fndc3a     | INSIDE                 | 0.237                                                        | 9.821                          | 1348.47            | 13243.63           | 2.324                          | 1132.61            | 2632.08            |
| A_68_P29713892 | chr14:73109778-73109822                           | NM_207636:10      | Fndc3a     | INSIDE                 | 0.344                                                        | 10.265                         | 13839.32           | 142063.40          | 3.526                          | 12155.77           | 42867.09           |
| A_68_P23577610 | chr5:31597885-31597929                            | NM_022424:344     | Fndc4      | INSIDE                 | 0.481                                                        | 3.876                          | 2752.14            | 10667.55           | 1.864                          | 2262.72            | 4217.11            |
| A_68_P23577613 | chr5:31598167-31598211                            | NM_022424:62      | Fndc4      | INSIDE                 | 0.574                                                        | 3.079                          | 1441.87            | 4439.37            | 1.767                          | 1181.80            | 2088.55            |
| A_68_P27810090 | chr11:54251929-54251973                           | NM_173753:270     | Fnip1      | INSIDE                 | 0.261                                                        | 7.954                          | 2068.67            | 16454.92           | 2.073                          | 1619.88            | 3357.35            |
| A_68_P27810087 | chr11:54251592-54251636                           | NM_173753:-66     | Fnip1      | PROMOTER               | 0.4                                                          | 0.694                          | 2971.60            | 2061.06            | 0.277                          | 2261.99            | 627.61             |
| A_68_P28604394 | chr12:86827035-86827079                           | NM_010234:12206   | Fos        | DOWNSTREAM             | 0.555                                                        | 6.086                          | 1484.00            | 9032.17            | 3.376                          | 1256.43            | 4242.17            |
| A_68_P24992615 | chr7:19895551-19895595                            | NM_008036:-178    | Fosb       | PROMOTER               | 0.278                                                        | 1.384                          | 1330.77            | 1841.72            | 0.384                          | 1033.93            | 397.39             |
| A_68_P24992603 | chr7:19894118-19894162                            | NM_008036:1254    | Fosb       | INSIDE                 | 0.652                                                        | 0.647                          | 937.07             | 605.99             | 0.422                          | 765.94             | 323.17             |
| A_68_P23582164 | chr5:32439192-32439236                            | NM_008037:370     | Fosl2      | INSIDE                 | 0.438                                                        | 5.630                          | 2352.80            | 13247.34           | 2.464                          | 2001.74            | 4931.33            |
| A_68_P23582152 | chr5:32437568-32437612                            | NM_008037:-1254   | Fosl2      | PROMOTER               | 0.594                                                        | 7.937                          | 791.55             | 6282.38            | 4.717                          | 735.72             | 3470.66            |
| A_68_P23582162 | chr5:32438904-32438948                            | NM_008037:82      | Fosl2      | INSIDE                 | 0.436                                                        | 0.710                          | 1651.22            | 1172.32            | 0.309                          | 1329.52            | 411.27             |
| A_68_P23582160 | chr5:32438700-32438744                            | NM_008037:-122    | Fosl2      | PROMOTER               | 0.602                                                        | 0.596                          | 822.70             | 490.01             | 0.359                          | 719.14             | 258.00             |
| A_68_P28463190 | chr12:58643591-58643635                           | NM_008259:3496    | Foxa1      | INSIDE                 | 0.158                                                        | 15.644                         | 1325.88            | 20742.12           | 2.476                          | 1278.01            | 3164.06            |
| A_68_P28463194 | chr12:58643991-58644035                           | NM_008259:3096    | Foxa1      | INSIDE                 | 0.592                                                        | 2.906                          | 1441.61            | 4188.94            | 1.721                          | 1200.29            | 2066.01            |
| A_68_P21727904 | chr2:147870499-147870543                          | NM_010446:2185    | Foxa2      | INSIDE                 | 0.413                                                        | 0.298                          | 2007.38            | 598.65             | 0.123                          | 1411.39            | 173.94             |
| A_68_P21727901 | chr2:147870136-147870180                          | NM_010446:2547    | Foxa2      | INSIDE                 | 0.605                                                        | 0.164                          | 4403.84            | 723.54             | 0.099                          | 3016.30            | 299.71             |
| A_68_P31982709 | chr19:16947995-16948040                           | NM_008023:303     | Foxb2      | INSIDE                 | 0.443                                                        | 0.474                          | 976.06             | 462.86             | 0.21                           | 817.77             | 171.89             |
| A_68_P31982710 | chr19:16948092-16948136                           | NM_008023:206     | Foxb2      | INSIDE                 | 0.488                                                        | 0.612                          | 1899.51            | 1161.97            | 0.298                          | 1639.82            | 489.07             |
| A_68_P28925097 | chr13:31898615-31898660                           | NM_008592:123     | Foxc1      | INSIDE                 | 0.582                                                        | 2.603                          | 1630.93            | 4244.97            | 1.515                          | 1490.87            | 2259.28            |
| A_68_P28925107 | chr13:31900007-31900051                           | NM_008592:1514    | Foxc1      | INSIDE                 | 0.269                                                        | 5.495                          | 1158.52            | 6365.60            | 1.475                          | 1102.05            | 1625.91            |
| A_68_P26224615 | chr8:123641830-123641874                          | NM_013519:1782    | Foxc2      | INSIDE                 | 0.505                                                        | 0.312                          | 1449.04            | 452.43             | 0.158                          | 1065.72            | 168.08             |
| A_68_P29257223 | chr13:99136439-99136483                           | NM_008242:12261   | Foxd1      | DOWNSTREAM             | 0.222                                                        | 32.878                         | 2081.36            | 68430.25           | 7.311                          | 2015.04            | 14731.69           |
| A_68_P23145500 | chr4:99317555-99317599                            | NM_010425:-5413   | Foxd3      | PROMOTER               | 0.421                                                        | 0.288                          | 2616.70            | 754.15             | 0.121                          | 1965.49            | 238.55             |
| A_68_P23145552 | chr4:99323494-99323538                            | NM_010425:527     | Foxd3      | INSIDE                 | 0.528                                                        | 0.564                          | 1457.91            | 822.32             | 0.298                          | 1233.70            | 367.20             |
| A_68_P23145560 | chr4:99324186-99324230                            | NM_010425:1219    | Foxd3      | INSIDE                 | 0.588                                                        | 4.867                          | 1999.33            | 9729.87            | 2.86                           | 1725.55            | 4934.40            |
| A_68_P23145563 | chr4:99324552-99324596                            | NM_010425:1585    | Foxd3      | INSIDE                 | 0.324                                                        | 4.813                          | 2447.77            | 11781.11           | 1.557                          | 2105.03            | 3278.05            |
| A_68_P32026412 | chr19:24971921-24971965                           | NM_008022:3857    | Foxd4      | DOWNSTREAM             | 0.436                                                        | 0.271                          | 1853.06            | 501.62             | 0.118                          | 1496.21            | 176.51             |
| A_68_P32026433 | chr19:24974465-24974509                           | NM_008022:1313    | Foxd4      | INSIDE                 | 0.4                                                          | 0.737                          | 2695.99            | 1986.81            | 0.295                          | 2207.77            | 651.03             |
| A_68_P22888266 | chr4:46358077-46358121                            | NM_183298:1033    | Foxe1      | INSIDE                 | 0.633                                                        | 4.144                          | 2190.68            | 9077.89            | 2.624                          | 1744.79            | 4577.54            |
| A_68_P23222364 | chr4:114598169-114598213                          | NM_015758:428     | Foxe3      | INSIDE                 | 0.434                                                        | 0.237                          | 2299.20            | 543.97             | 0.103                          | 1832.81            | 188.23             |
| A_68_P28924022 | chr13:31712233-31712277                           | NM_010225:-5430   | Foxf2      | PROMOTER               | 0.648                                                        | 0.672                          | 949.79             | 638.38             | 0.435                          | 833.11             | 362.61             |
| A_68_P28419968 | chr12:50486468-50486512                           | NM_008241:2497    | Foxg1      | INSIDE                 | 0.29                                                         | 0.367                          | 3366.09            | 1236.07            | 0.106                          | 2328.34            | 247.72             |
| A_68_P28419964 | chr12:50485980-50486024                           | NM_008241:2009    | Foxg1      | INSIDE                 | 0.413                                                        | 0.655                          | 2280.13            | 1493.63            | 0.271                          | 1787.04            | 483.68             |
| A_68_P24533915 | chr6:70907176-70907220                            | NM_001101464:599  | Foxi3      | INSIDE                 | 0.274                                                        | 1.841                          | 3441.50            | 6335.32            | 0.504                          | 2499.18            | 1259.50            |
| A_68_P24533907 | chr6:70906387-70906431                            | NM_001101464:-191 | Foxi3      | PROMOTER               | 0.461                                                        | 0.327                          | 4996.50            | 1634.16            | 0.151                          | 3620.74            | 545.71             |
| A_68_P24533908 | chr6:70906504-70906548                            | NM_001101464:-73  | Foxi3      | PROMOTER               | 0.558                                                        | 0.385                          | 1769.83            | 680.83             | 0.215                          | 1429.16            | 306.93             |
| A_68_P24810537 | chr6:122761310-122761354                          | NM_021899:-8869   | Foxj2      | PROMOTER               | 0.242                                                        | 1.710                          | 783.75             | 1340.49            | 0.414                          | 690.96             | 285.92             |
| A_68_P28189606 | chr11:121121098-121121142                         | NM_001080932:-180 | Foxk2      | PROMOTER               | 0.348                                                        | 5.718                          | 2350.34            | 13439.24           | 1.991                          | 2044.75            | 4070.94            |
| A_68_P26224704 | chr8:123652972-123653016                          | NM_008024:1410    | Foxl1      | INSIDE                 | 0.66                                                         | 0.401                          | 1419.70            | 569.26             | 0.265                          | 1115.88            | 295.21             |
| A_68_P26761428 | chr9:98856199-98856243                            | NM_012020:195     | Foxl2      | INSIDE                 | 0.448                                                        | 6.841                          | 1510.84            | 10336.09           | 3.068                          | 1238.63            | 3800.07            |
| A_68_P26761439 | chr9:98857310-98857354                            | NM_012020:1307    | Foxl2      | INSIDE                 | 0.614                                                        | 0.233                          | 3054.19            | 712.86             | 0.143                          | 2387.31            | 342.29             |

| ProbeName      | Target position of probe on CpG island microarray | TargetID            | GeneSymbol | CpG island Description | Ratio of relative methylation (TiO <sub>2</sub> -NP/Vehicle) | Sham group                     |                    |                    | TiO <sub>2</sub> -H group      |                    |                    |
|----------------|---------------------------------------------------|---------------------|------------|------------------------|--------------------------------------------------------------|--------------------------------|--------------------|--------------------|--------------------------------|--------------------|--------------------|
|                |                                                   |                     |            |                        |                                                              | Relative methylation (Cy5/Cy3) | Cy3 signal (Input) | Cy5 signal (MeDIP) | Relative methylation (Cy5/Cy3) | Cy3 signal (Input) | Cy5 signal (MeDIP) |
| A_68_P26761440 | chr9:98857399-98857443                            | NM_012020:1395      | Foxl2      | INSIDE                 | 0.448                                                        | 3.714                          | 1698.08            | 6305.88            | 1.664                          | 1317.25            | 2192.27            |
| A_68_P26761418 | chr9:98855113-98855157                            | NR_003248:595       | Foxl2os    | INSIDE                 | 0.517                                                        | 0.681                          | 982.79             | 669.53             | 0.352                          | 881.52             | 310.55             |
| A_68_P24838573 | chr6:128313280-128313324                          | NM_008021:291       | Foxm1      | INSIDE                 | 0.532                                                        | 0.308                          | 2159.55            | 665.68             | 0.164                          | 1579.24            | 258.89             |
| A_68_P28675864 | chr12:100630527-100630571                         | NM_183186:57736     | Foxn3      | INSIDE                 | 0.647                                                        | 0.263                          | 1709.47            | 449.21             | 0.17                           | 1345.47            | 228.62             |
| A_68_P22134615 | chr3:52073411-52073455                            | NM_019739:1174      | Foxo1      | INSIDE                 | 0.159                                                        | 1.775                          | 7725.16            | 13710.01           | 0.282                          | 5184.75            | 1462.71            |
| A_68_P22134618 | chr3:52073824-52073868                            | NM_019739:1588      | Foxo1      | INSIDE                 | 0.599                                                        | 4.027                          | 570.55             | 2297.75            | 2.414                          | 519.99             | 1255.19            |
| A_68_P27094083 | chr10:41996329-41996375                           | NM_019740:196       | Foxo3      | INSIDE                 | 0.549                                                        | 6.616                          | 906.72             | 5998.57            | 3.634                          | 744.89             | 2706.70            |
| A_68_P27094078 | chr10:41995833-41995877                           | NM_019740:694       | Foxo3      | INSIDE                 | 0.488                                                        | 3.158                          | 1287.91            | 4066.75            | 1.542                          | 1065.76            | 1643.62            |
| A_68_P32563078 | chrX:98450245-98450289                            | NM_018789:400       | Foxo4      | INSIDE                 | 0.419                                                        | 4.799                          | 2172.30            | 10423.83           | 2.011                          | 2654.85            | 5339.44            |
| A_68_P23250309 | chr4:119940503-119940547                          | NM_194060:19342     | Foxo6      | INSIDE                 | 0.312                                                        | 7.644                          | 1442.21            | 11023.78           | 2.386                          | 1441.46            | 3439.49            |
| A_68_P23250457 | chr4:119959679-119959723                          | NM_194060:166       | Foxo6      | INSIDE                 | 0.451                                                        | 4.815                          | 766.35             | 3690.27            | 2.172                          | 768.35             | 1669.15            |
| A_68_P23250423 | chr4:119955345-119955389                          | NM_194060:4500      | Foxo6      | INSIDE                 | 0.468                                                        | 2.934                          | 2848.89            | 8358.62            | 1.373                          | 2199.56            | 3020.49            |
| A_68_P24683080 | chr6:98978547-98978591                            | NM_001197322:-276   | Foxp1      | PROMOTER               | 0.343                                                        | 4.148                          | 1681.19            | 6974.41            | 1.422                          | 1446.78            | 2057.49            |
| A_68_P24253394 | chr6:14851545-14851589                            | NM_053242:218       | Foxp2      | INSIDE                 | 0.542                                                        | 0.632                          | 2056.09            | 1300.30            | 0.343                          | 1694.70            | 580.56             |
| A_68_P31214913 | chr17:48046778-48046822                           | NM_001110824:14781  | Foxp4      | INSIDE                 | 0.393                                                        | 12.576                         | 5432.99            | 68325.44           | 4.936                          | 4172.51            | 20597.22           |
| A_68_P31214657 | chr17:48009489-48009535                           | NM_001110824:52069  | Foxp4      | INSIDE                 | 0.445                                                        | 0.598                          | 2724.91            | 1630.35            | 0.267                          | 1899.07            | 506.12             |
| A_68_P28923686 | chr13:31651815-31651859                           | NM_008239:1798      | Foxq1      | INSIDE                 | 0.259                                                        | 8.790                          | 1076.75            | 9464.54            | 2.275                          | 1085.90            | 2470.17            |
| A_68_P28923679 | chr13:31651001-31651045                           | NM_008239:984       | Foxq1      | INSIDE                 | 0.59                                                         | 0.500                          | 2086.85            | 1043.04            | 0.295                          | 1548.12            | 456.29             |
| A_68_P28923670 | chr13:31649941-31649985                           | NM_008239:-76       | Foxq1      | PROMOTER               | 0.638                                                        | 0.572                          | 1508.25            | 863.27             | 0.365                          | 1236.15            | 451.09             |
| A_68_P28923672 | chr13:31650159-31650203                           | NM_008239:142       | Foxq1      | INSIDE                 | 0.603                                                        | 0.644                          | 820.41             | 528.25             | 0.388                          | 656.90             | 254.91             |
| A_68_P26467611 | chr9:44248858-44248902                            | NM_001033469:71     | Foxr1      | INSIDE                 | 0.526                                                        | 3.419                          | 1165.43            | 3984.24            | 1.8                            | 902.53             | 1624.16            |
| A_68_P30356791 | chr15:77786971-77787015                           | NM_001017983:160    | Foxred2    | INSIDE                 | 0.501                                                        | 3.832                          | 3127.71            | 11986.52           | 1.92                           | 2519.78            | 4838.52            |
| A_68_P30356784 | chr15:77786172-77786216                           | NM_001017983:958    | Foxred2    | INSIDE                 | 0.613                                                        | 0.414                          | 1629.63            | 675.06             | 0.254                          | 1148.36            | 291.39             |
| A_68_P32117383 | chr19:41905096-41905140                           | NM_008043:659       | Frat1      | INSIDE                 | 0.41                                                         | 6.826                          | 1965.36            | 13415.00           | 2.798                          | 1620.10            | 4532.39            |
| A_68_P32117376 | chr19:41904363-41904407                           | NM_008043:-75       | Frat1      | PROMOTER               | 0.525                                                        | 0.523                          | 2134.34            | 1115.30            | 0.274                          | 1695.74            | 465.29             |
| A_68_P32117486 | chr19:41921651-41921695                           | NM_177603:950       | Frat2      | INSIDE                 | 0.418                                                        | 0.326                          | 2336.02            | 760.74             | 0.136                          | 1590.21            | 216.58             |
| A_68_P23018909 | chr4:73659645-73659689                            | NM_172869:160       | FrmD3      | INSIDE                 | 0.468                                                        | 4.905                          | 923.62             | 4530.27            | 2.295                          | 800.53             | 1837.35            |
| A_68_P20967784 | chr2:4322707-4322751                              | NM_001177843:707    | FrmD4a     | INSIDE                 | 0.189                                                        | 16.821                         | 7527.32            | 126614.00          | 3.176                          | 10461.68           | 33222.13           |
| A_68_P24674231 | chr6:97567120-97567164                            | NM_145148:509       | FrmD4b     | INSIDE                 | 0.53                                                         | 0.372                          | 5806.70            | 2162.43            | 0.197                          | 4399.25            | 868.33             |
| A_68_P21582988 | chr2:121632726-121632770                          | NM_172673:45        | FrmD5      | INSIDE                 | 0.453                                                        | 20.750                         | 4897.55            | 101624.80          | 9.406                          | 4143.55            | 38975.12           |
| A_68_P21582987 | chr2:121632660-121632704                          | NM_172673:111       | FrmD5      | INSIDE                 | 0.563                                                        | 2.746                          | 4388.39            | 12050.75           | 1.547                          | 3599.42            | 5566.79            |
| A_68_P28522738 | chr12:71926826-71926870                           | NM_028127:348       | FrmD6      | INSIDE                 | 0.422                                                        | 4.704                          | 724.75             | 3409.49            | 1.987                          | 592.70             | 1177.70            |
| A_68_P32815030 | chrX:164561176-164561220                          | NM_001033330:453967 | FrmD4      | INSIDE                 | 0.378                                                        | 4.388                          | 2690.99            | 11808.96           | 1.658                          | 3484.59            | 5776.30            |
| A_68_P27479719 | chr10:116584876-116584920                         | NM_177798:632       | Frs2       | INSIDE                 | 0.666                                                        | 0.711                          | 1986.56            | 1411.91            | 0.473                          | 1559.59            | 737.76             |
| A_68_P27479722 | chr10:116585133-116585177                         | NM_177798:376       | Frs2       | INSIDE                 | 0.561                                                        | 2.606                          | 4551.75            | 11861.79           | 1.461                          | 3467.57            | 5066.63            |
| A_68_P31213683 | chr17:47831917-47831961                           | NM_144939:-217      | Frs3       | DIVERGENT_PROMOTER     | 0.305                                                        | 9.159                          | 3544.93            | 32466.79           | 2.798                          | 2953.21            | 8261.78            |
| A_68_P23796637 | chr5:73647888-73647932                            | NM_028194:-53       | Fryl       | PROMOTER               | 0.425                                                        | 0.520                          | 1724.51            | 896.51             | 0.221                          | 1292.85            | 285.95             |
| A_68_P23796632 | chr5:73647376-73647420                            | NM_028194:459       | Fryl       | INSIDE                 | 0.493                                                        | 4.801                          | 1052.79            | 5054.89            | 2.368                          | 984.02             | 2330.00            |
| A_68_P24154219 | chr5:143723667-143723712                          | NM_007984:1656      | Fscn1      | INSIDE                 | 0.478                                                        | 7.196                          | 1552.66            | 11173.16           | 3.438                          | 1226.30            | 4216.55            |
| A_68_P24154206 | chr5:143722119-143722163                          | NM_007984:107       | Fscn1      | INSIDE                 | 0.665                                                        | 3.359                          | 1763.26            | 5923.65            | 2.233                          | 1345.15            | 3004.16            |
| A_68_P27278867 | chr10:79240093-79240137                           | NM_031380:96        | Fst13      | INSIDE                 | 0.077                                                        | 1.565                          | 8031.39            | 12570.87           | 0.12                           | 5164.75            | 618.52             |
| A_68_P27800933 | chr11:52578613-52578657                           | NM_177059:427       | Fst14      | INSIDE                 | 0.526                                                        | 0.411                          | 2551.81            | 1049.67            | 0.216                          | 1880.60            | 407.03             |
| A_68_P31129059 | chr17:29797809-29797853                           | NM_028791:285       | Ftsjd2     | INSIDE                 | 0.635                                                        | 9.117                          | 1696.61            | 15468.22           | 5.789                          | 1709.09            | 9893.73            |
| A_68_P21109951 | chr2:31428059-31428103                            | NM_001033389:-164   | Fubp3      | PROMOTER               | 0.426                                                        | 27.351                         | 1075.75            | 29422.88           | 11.651                         | 1202.14            | 14006.08           |
| A_68_P21109952 | chr2:31428160-31428204                            | NM_001033389:-62    | Fubp3      | PROMOTER               | 0.385                                                        | 1.729                          | 1792.26            | 3098.41            | 0.665                          | 1460.45            | 970.88             |
| A_68_P23331228 | chr4:135476820-135476864                          | NM_024243:202       | Fuca1      | INSIDE                 | 0.6                                                          | 0.260                          | 1758.33            | 457.32             | 0.156                          | 1391.38            | 217.06             |



| ProbeName      | Target position of probe on CpG island microarray | TargetID          | GeneSymbol    | CpG island Description | Ratio of relative methylation (TiO <sub>2</sub> -NP/Vehicle) | Sham group                     |                    |                    | TiO <sub>2</sub> -H group      |                    |                    |
|----------------|---------------------------------------------------|-------------------|---------------|------------------------|--------------------------------------------------------------|--------------------------------|--------------------|--------------------|--------------------------------|--------------------|--------------------|
|                |                                                   |                   |               |                        |                                                              | Relative methylation (Cy5/Cy3) | Cy3 signal (Input) | Cy5 signal (MeDIP) | Relative methylation (Cy5/Cy3) | Cy3 signal (Input) | Cy5 signal (MeDIP) |
| A_68_P25266551 | chr7:87547096-87547140                            | NM_011046:530     | Furin         | INSIDE                 | 0.272                                                        | 50.346                         | 868.92             | 43746.91           | 13.704                         | 1807.75            | 24774.12           |
| A_68_P25266552 | chr7:87547168-87547212                            | NM_011046:458     | Furin         | INSIDE                 | 0.349                                                        | 14.752                         | 1249.08            | 18425.87           | 5.144                          | 1184.69            | 6093.72            |
| A_68_P29448409 | chr14:21514700-21514744                           | NM_028428:533     | Fut11         | INSIDE                 | 0.566                                                        | 3.543                          | 986.93             | 3496.59            | 2.007                          | 904.75             | 1815.67            |
| A_68_P28558333 | chr12:78339907-78339951                           | NM_016893:-79     | Fut8          | PROMOTER               | 0.328                                                        | 9.596                          | 1608.63            | 15436.55           | 3.147                          | 1495.21            | 4705.57            |
| A_68_P28558338 | chr12:78340507-78340551                           | NM_016893:521     | Fut8          | INSIDE                 | 0.605                                                        | 0.632                          | 2602.05            | 1645.70            | 0.383                          | 2079.16            | 795.58             |
| A_68_P28558336 | chr12:78340320-78340364                           | NM_016893:335     | Fut8          | INSIDE                 | 0.534                                                        | 3.597                          | 856.63             | 3081.42            | 1.921                          | 687.91             | 1321.56            |
| A_68_P28558329 | chr12:78339501-78339545                           | NM_016893:-485    | Fut8          | PROMOTER               | 0.18                                                         | 9.757                          | 780.65             | 7617.04            | 1.757                          | 613.25             | 1077.65            |
| A_68_P22791943 | chr4:25726823-25726867                            | NM_010243:306     | Fut9          | INSIDE                 | 0.365                                                        | 0.283                          | 3529.38            | 998.20             | 0.103                          | 2714.49            | 280.35             |
| A_68_P22791942 | chr4:25726695-25726739                            | NM_010243:434     | Fut9          | INSIDE                 | 0.31                                                         | 0.684                          | 1364.26            | 933.55             | 0.212                          | 1188.21            | 252.41             |
| A_68_P25089992 | chr7:52151653-52151697                            | NM_027376:226     | Fuz           | INSIDE                 | 0.485                                                        | 0.436                          | 1983.11            | 863.90             | 0.211                          | 1386.80            | 293.08             |
| A_68_P32022553 | chr19:24355018-24355062                           | NM_008044:36      | Fxn           | INSIDE                 | 0.525                                                        | 6.187                          | 1213.16            | 7505.30            | 3.247                          | 954.44             | 3099.50            |
| A_68_P22045621 | chr3:33919264-33919308                            | NM_001113188:286  | Fxr1          | INSIDE                 | 0.216                                                        | 22.222                         | 1583.87            | 35196.04           | 4.792                          | 1287.89            | 6171.01            |
| A_68_P22045622 | chr3:33919516-33919560                            | NM_001113188:538  | Fxr1          | INSIDE                 | 0.637                                                        | 2.252                          | 2817.10            | 6343.72            | 1.434                          | 2576.68            | 3695.97            |
| A_68_P27896201 | chr11:69446248-69446292                           | NM_011814:-202    | Fxr2          | PROMOTER               | 0.347                                                        | 0.310                          | 2306.57            | 716.14             | 0.108                          | 1629.22            | 175.41             |
| A_68_P25034759 | chr7:31837288-31837332                            | NM_052991:2562    | Fxyd1         | INSIDE                 | 0.497                                                        | 0.300                          | 1558.47            | 466.84             | 0.149                          | 1189.68            | 177.09             |
| A_68_P27077942 | chr10:39090283-39090342                           | NM_001122892:708  | Fyn           | INSIDE                 | 0.124                                                        | 1.530                          | 3941.07            | 6030.98            | 0.189                          | 2769.65            | 524.37             |
| A_68_P27077941 | chr10:39090193-39090237                           | NM_001122892:610  | Fyn           | INSIDE                 | 0.573                                                        | 0.639                          | 2419.94            | 1547.16            | 0.367                          | 1994.98            | 731.19             |
| A_68_P30655031 | chr16:32877641-32877685                           | NM_001159349:-207 | Fytd1         | DIVERGENT_PROMOTER     | 0.388                                                        | 0.485                          | 1114.23            | 539.88             | 0.188                          | 920.93             | 173.35             |
| A_68_P30655034 | chr16:32877951-32877995                           | NM_001159349:103  | Fytd1         | INSIDE                 | 0.573                                                        | 3.797                          | 1931.35            | 7332.85            | 2.174                          | 1515.61            | 3294.44            |
| A_68_P28080438 | chr11:102467204-102467248                         | NM_020510:1482    | Fzd2          | INSIDE                 | 0.547                                                        | 0.486                          | 1616.82            | 786.38             | 0.266                          | 1283.77            | 341.67             |
| A_68_P25307423 | chr7:96553263-96553307                            | NM_008055:409     | Fzd4          | INSIDE                 | 0.53                                                         | 3.048                          | 1175.70            | 3583.86            | 1.614                          | 1045.70            | 1687.87            |
| A_68_P20294249 | chr1:64782318-64782364                            | NM_001042659:1984 | Fzd5          | INSIDE                 | 0.262                                                        | 9.512                          | 1401.83            | 13334.23           | 2.488                          | 920.93             | 2290.97            |
| A_68_P20294244 | chr1:64781733-64781777                            | NM_001042659:2570 | Fzd5          | INSIDE                 | 0.602                                                        | 5.101                          | 575.98             | 2937.95            | 3.068                          | 569.96             | 1748.74            |
| A_68_P20294248 | chr1:64782204-64782248                            | NM_001042659:2098 | Fzd5          | INSIDE                 | 0.586                                                        | 2.630                          | 1533.36            | 4033.12            | 1.542                          | 1163.27            | 1793.85            |
| A_68_P20264199 | chr1:59540719-59540763                            | NM_008057:1750    | Fzd7          | INSIDE                 | 0.581                                                        | 2.819                          | 876.08             | 2469.66            | 1.638                          | 806.10             | 1320.64            |
| A_68_P31484544 | chr18:9212850-9212894                             | NM_008058:19      | Fzd8          | INSIDE                 | 0.389                                                        | 7.252                          | 966.81             | 7011.68            | 2.823                          | 868.88             | 2452.65            |
| A_68_P31484557 | chr18:9214262-9214306                             | NM_008058:1431    | Fzd8          | INSIDE                 | 0.428                                                        | 0.394                          | 1629.94            | 641.53             | 0.169                          | 1292.72            | 218.00             |
| A_68_P24115508 | chr5:135726136-135726180                          | NM_010246:759     | Fzd9          | INSIDE                 | 0.221                                                        | 0.363                          | 3077.48            | 1117.24            | 0.08                           | 2147.33            | 172.50             |
| A_68_P24115511 | chr5:135726586-135726630                          | NM_010246:309     | Fzd9          | INSIDE                 | 0.488                                                        | 0.267                          | 2434.43            | 649.52             | 0.13                           | 1814.97            | 236.48             |
| A_68_P24115510 | chr5:135726402-135726446                          | NM_010246:493     | Fzd9          | INSIDE                 | 0.563                                                        | 0.416                          | 1648.41            | 684.97             | 0.234                          | 1285.17            | 300.70             |
| A_68_P24115514 | chr5:135726995-135727039                          | NM_010246:-99     | Fzd9          | PROMOTER               | 0.484                                                        | 0.641                          | 850.92             | 545.48             | 0.31                           | 736.85             | 228.41             |
| A_68_P27289250 | chr10:80840838-80840882                           | NM_019757:255     | Fzr1          | INSIDE                 | 0.503                                                        | 0.377                          | 1169.09            | 440.53             | 0.19                           | 920.10             | 174.45             |
| A_68_P27289251 | chr10:80840907-80840951                           | NM_019757:187     | Fzr1          | INSIDE                 | 0.561                                                        | 0.607                          | 8113.33            | 4922.97            | 0.341                          | 6043.09            | 2057.76            |
| A_68_P27289254 | chr10:80841374-80841418                           | NM_019757:-281    | Fzr1          | DIVERGENT_PROMOTER     | 0.36                                                         | 1.943                          | 9174.02            | 17828.13           | 0.7                            | 5589.37            | 3914.09            |
| A_68_P23892217 | chr5:92512328-92512372                            | NM_001080797:-407 | G3bp2         | PROMOTER               | 0.245                                                        | 11.491                         | 2576.55            | 29608.31           | 2.814                          | 2192.39            | 6169.38            |
| A_68_P23892219 | chr5:92512481-92512525                            | NM_001080797:-559 | G3bp2         | PROMOTER               | 0.312                                                        | 1.783                          | 7799.34            | 13904.26           | 0.557                          | 5517.59            | 3072.77            |
| A_68_P23892215 | chr5:92512150-92512194                            | NM_001080797:-229 | G3bp2         | PROMOTER               | 0.338                                                        | 5.944                          | 1919.01            | 11406.71           | 2.009                          | 1944.11            | 3906.22            |
| A_68_P23892218 | chr5:92512396-92512440                            | NM_001080797:-475 | G3bp2         | PROMOTER               | 0.457                                                        | 0.296                          | 1711.96            | 507.01             | 0.135                          | 1244.05            | 168.37             |
| A_68_P27897193 | chr11:69617732-69617776                           | NR_027913:584     | G630025P09Rik | INSIDE                 | 0.353                                                        | 0.191                          | 3619.85            | 690.41             | 0.067                          | 2557.37            | 172.07             |
| A_68_P28176853 | chr11:119129394-119129438                         | NM_008064:95      | Gaa           | INSIDE                 | 0.517                                                        | 2.988                          | 1053.18            | 3146.47            | 1.544                          | 963.66             | 1487.46            |
| A_68_P27898357 | chr11:69805074-69805118                           | NM_019749:225     | Gabarap       | INSIDE                 | 0.504                                                        | 0.125                          | 6403.09            | 798.62             | 0.063                          | 3963.44            | 248.96             |
| A_68_P26171007 | chr8:114465131-114465175                          | NM_026693:535     | Gabarap2      | INSIDE                 | 0.135                                                        | 187.032                        | 1837.26            | 343627.60          | 25.185                         | 2661.22            | 67023.62           |
| A_68_P31166955 | chr17:37183328-37183372                           | NM_019439:440     | Gabbr1        | INSIDE                 | 0.546                                                        | 0.182                          | 6567.77            | 1197.77            | 0.1                            | 4593.09            | 457.16             |
| A_68_P31166953 | chr17:37183108-37183152                           | NM_019439:220     | Gabbr1        | INSIDE                 | 0.483                                                        | 5.207                          | 494.20             | 2573.43            | 2.517                          | 385.40             | 969.87             |
| A_68_P31166952 | chr17:37183039-37183083                           | NM_019439:150     | Gabbr1        | INSIDE                 | 0.531                                                        | 3.256                          | 1518.21            | 4942.58            | 1.727                          | 1237.75            | 2137.94            |
| A_68_P30925866 | chr16:84835027-84835071                           | NM_008065:-320    | Gabpa         | PROMOTER               | 0.619                                                        | 0.299                          | 3781.56            | 1129.27            | 0.185                          | 2904.43            | 537.16             |

| ProbeName      | Target position of probe on CpG island microarray | TargetID          | GeneSymbol | CpG island Description | Ratio of relative methylation (TiO <sub>2</sub> -NP/Vehicle) | Sham group                     |                    |                    | TiO <sub>2</sub> -H group      |                    |                    |
|----------------|---------------------------------------------------|-------------------|------------|------------------------|--------------------------------------------------------------|--------------------------------|--------------------|--------------------|--------------------------------|--------------------|--------------------|
|                |                                                   |                   |            |                        |                                                              | Relative methylation (Cy5/Cy3) | Cy3 signal (Input) | Cy5 signal (MeDIP) | Relative methylation (Cy5/Cy3) | Cy3 signal (Input) | Cy5 signal (MeDIP) |
| A_68_P21609427 | chr2:126500825-126500869                          | NM_010249:376     | Gabpb1     | INSIDE                 | 0.412                                                        | 8.743                          | 1050.96            | 9188.85            | 3.599                          | 998.18             | 3592.58            |
| A_68_P23787605 | chr5:72049192-72049236                            | NM_010251:333     | Gabra4     | INSIDE                 | 0.551                                                        | 7.889                          | 993.89             | 7840.85            | 4.343                          | 849.95             | 3691.34            |
| A_68_P25151144 | chr7:64764458-64764502                            | NM_176942:899     | Gabra5     | INSIDE                 | 0.293                                                        | 9.248                          | 1897.13            | 17544.88           | 2.711                          | 2047.40            | 5551.45            |
| A_68_P25151575 | chr7:64847050-64847094                            | NM_008071:530     | Gabrb3     | INSIDE                 | 0.404                                                        | 0.424                          | 3468.55            | 1469.31            | 0.171                          | 2636.97            | 451.77             |
| A_68_P32457442 | chrX:69520267-69520311                            | NM_017369:-228    | Gabre      | PROMOTER               | 0.311                                                        | 11.686                         | 2613.67            | 30543.72           | 3.633                          | 2822.07            | 10252.28           |
| A_68_P25150559 | chr7:64642303-64642347                            | NM_008074:-83     | Gabrg3     | DIVERGENT_PROMOTER     | 0.27                                                         | 0.668                          | 997.77             | 666.74             | 0.18                           | 956.73             | 172.55             |
| A_68_P21059051 | chr2:22478980-22479024                            | NM_008078:1156    | Gad2       | INSIDE                 | 0.561                                                        | 0.530                          | 2670.91            | 1416.84            | 0.298                          | 2028.38            | 603.54             |
| A_68_P21059041 | chr2:22477785-22477829                            | NM_008078:-40     | Gad2       | PROMOTER               | 0.438                                                        | 0.720                          | 9901.76            | 7125.49            | 0.315                          | 6746.09            | 2125.46            |
| A_68_P27286395 | chr10:80391635-80391679                           | NM_008655:-1179   | Gadd45b    | PROMOTER               | 0.452                                                        | 0.601                          | 1445.67            | 868.49             | 0.272                          | 1106.37            | 300.52             |
| A_68_P27286403 | chr10:80392697-80392741                           | NM_008655:-117    | Gadd45b    | PROMOTER               | 0.518                                                        | 0.562                          | 826.90             | 464.86             | 0.291                          | 588.86             | 171.56             |
| A_68_P29034741 | chr13:51941420-51941464                           | NM_011817:-601    | Gadd45g    | PROMOTER               | 0.471                                                        | 6.776                          | 2471.76            | 16749.05           | 3.189                          | 2032.65            | 6483.08            |
| A_68_P29034752 | chr13:51942644-51942688                           | NM_011817:623     | Gadd45g    | INSIDE                 | 0.544                                                        | 0.610                          | 5685.95            | 3470.58            | 0.332                          | 4173.85            | 1386.26            |
| A_68_P29034750 | chr13:51942448-51942492                           | NM_011817:427     | Gadd45g    | INSIDE                 | 0.563                                                        | 0.402                          | 6802.48            | 2736.25            | 0.227                          | 4371.48            | 990.46             |
| A_68_P29034746 | chr13:51942012-51942056                           | NM_011817:-9      | Gadd45g    | PROMOTER               | 0.49                                                         | 3.335                          | 1694.58            | 5651.45            | 1.633                          | 1453.81            | 2373.79            |
| A_68_P28669125 | chr12:99497683-99497727                           | NM_008079:-157    | Galc       | DIVERGENT_PROMOTER     | 0.322                                                        | 8.292                          | 1409.66            | 11689.27           | 2.673                          | 1229.54            | 3286.98            |
| A_68_P28669124 | chr12:99497596-99497640                           | NM_008079:-71     | Galc       | DIVERGENT_PROMOTER     | 0.47                                                         | 4.249                          | 1459.93            | 6202.74            | 1.997                          | 1204.70            | 2405.30            |
| A_68_P28669118 | chr12:99496934-99496978                           | NM_008079:591     | Galc       | INSIDE                 | 0.348                                                        | 0.670                          | 836.84             | 561.07             | 0.233                          | 792.73             | 184.80             |
| A_68_P22892659 | chr4:47105046-47105090                            | NM_172693:244     | Galnt12    | INSIDE                 | 0.355                                                        | 10.172                         | 1003.17            | 10204.31           | 3.606                          | 785.60             | 2833.17            |
| A_68_P22892661 | chr4:47105201-47105245                            | NM_172693:398     | Galnt12    | INSIDE                 | 0.446                                                        | 5.717                          | 4336.11            | 24787.40           | 2.549                          | 3894.42            | 9927.72            |
| A_68_P31347831 | chr17:74059828-74059872                           | NM_027864:-59     | Galnt14    | PROMOTER               | 0.352                                                        | 7.268                          | 2660.90            | 19338.79           | 2.557                          | 2039.03            | 5214.45            |
| A_68_P31347829 | chr17:74059599-74059643                           | NM_027864:171     | Galnt14    | INSIDE                 | 0.486                                                        | 10.315                         | 2015.33            | 20788.29           | 5.013                          | 1913.21            | 9591.43            |
| A_68_P31347825 | chr17:74059155-74059199                           | NM_027864:615     | Galnt14    | INSIDE                 | 0.666                                                        | 0.720                          | 7551.82            | 5433.89            | 0.479                          | 4699.23            | 2251.34            |
| A_68_P27385039 | chr10:98569849-98569893                           | NM_015737:-898    | Galnt4     | PROMOTER               | 0.233                                                        | 11.635                         | 804.42             | 9359.60            | 2.715                          | 643.78             | 1747.77            |
| A_68_P30487413 | chr15:100559897-100559941                         | NM_001161767:-111 | Galnt6     | PROMOTER               | 0.527                                                        | 0.357                          | 2648.00            | 945.00             | 0.188                          | 2017.48            | 379.44             |
| A_68_P25892525 | chr8:60132078-60132122                            | NM_001167981:-248 | Galnt7     | PROMOTER               | 0.281                                                        | 1.671                          | 2534.53            | 4234.44            | 0.47                           | 2112.33            | 991.99             |
| A_68_P25892520 | chr8:60131247-60131291                            | NM_001167981:584  | Galnt7     | INSIDE                 | 0.498                                                        | 5.662                          | 904.42             | 5120.98            | 2.82                           | 780.72             | 2201.65            |
| A_68_P25892513 | chr8:60130467-60130511                            | NM_001167981:1364 | Galnt7     | INSIDE                 | 0.511                                                        | 3.224                          | 1102.10            | 3553.19            | 1.647                          | 868.20             | 1429.71            |
| A_68_P23980414 | chr5:110973587-110973631                          | NM_198306:245     | Galnt9     | INSIDE                 | 0.442                                                        | 7.774                          | 2008.29            | 15612.26           | 3.436                          | 1700.57            | 5842.70            |
| A_68_P23980413 | chr5:110973506-110973550                          | NM_198306:165     | Galnt9     | INSIDE                 | 0.555                                                        | 3.903                          | 1118.28            | 4364.94            | 2.168                          | 979.25             | 2123.23            |
| A_68_P23980412 | chr5:110973428-110973472                          | NM_198306:87      | Galnt9     | INSIDE                 | 0.407                                                        | 3.511                          | 1807.41            | 6345.05            | 1.428                          | 1480.28            | 2114.22            |
| A_68_P28576082 | chr12:81619771-81619815                           | NM_001081421:-184 | Galnt11    | PROMOTER               | 0.406                                                        | 5.436                          | 1013.19            | 5508.09            | 2.207                          | 950.71             | 2098.66            |
| A_68_P28576088 | chr12:81620372-81620416                           | NM_001081421:418  | Galnt11    | INSIDE                 | 0.46                                                         | 4.556                          | 1818.93            | 8287.05            | 2.094                          | 1568.25            | 3284.45            |
| A_68_P28576092 | chr12:81620747-81620791                           | NM_001081421:792  | Galnt11    | INSIDE                 | 0.654                                                        | 0.414                          | 1744.47            | 722.82             | 0.271                          | 1435.89            | 389.35             |
| A_68_P25420899 | chr7:118923736-118923780                          | NM_173739:-267    | Galnt14    | PROMOTER               | 0.332                                                        | 8.964                          | 2631.83            | 23591.71           | 2.976                          | 2526.26            | 7519.38            |
| A_68_P25420896 | chr7:118923422-118923466                          | NM_173739:47      | Galnt14    | INSIDE                 | 0.631                                                        | 0.611                          | 1330.92            | 813.32             | 0.385                          | 1083.76            | 417.61             |
| A_68_P30364007 | chr15:78873556-78873600                           | NM_015738:1264    | Galr3      | INSIDE                 | 0.609                                                        | 3.135                          | 1875.79            | 5879.70            | 1.91                           | 1612.64            | 3079.91            |
| A_68_P22864172 | chr4:41702487-41702531                            | NM_016658:383     | Galt       | INSIDE                 | 0.558                                                        | 0.395                          | 2337.88            | 922.60             | 0.22                           | 1771.17            | 390.16             |
| A_68_P27282039 | chr10:79723618-79723662                           | NM_010255:73      | Gamt       | INSIDE                 | 0.49                                                         | 0.398                          | 1230.19            | 489.11             | 0.195                          | 1006.46            | 196.21             |
| A_68_P27282040 | chr10:79723724-79723768                           | NM_010255:-33     | Gamt       | DIVERGENT_PROMOTER     | 0.621                                                        | 0.297                          | 3735.52            | 1109.67            | 0.184                          | 2460.85            | 453.80             |
| A_68_P27282041 | chr10:79723845-79723889                           | NM_010255:-153    | Gamt       | DIVERGENT_PROMOTER     | 0.234                                                        | 0.663                          | 1398.62            | 927.46             | 0.155                          | 1088.73            | 168.63             |
| A_68_P24819104 | chr6:125115336-125115380                          | NM_008084:243     | Gapdh      | INSIDE                 | 0.205                                                        | 0.227                          | 6173.14            | 1404.04            | 0.047                          | 3749.46            | 174.54             |
| A_68_P24819105 | chr6:125115461-125115505                          | NM_008084:119     | Gapdh      | INSIDE                 | 0.335                                                        | 0.558                          | 6802.88            | 3795.55            | 0.187                          | 4388.22            | 819.41             |
| A_68_P24819103 | chr6:125115217-125115261                          | NM_008084:363     | Gapdh      | INSIDE                 | 0.663                                                        | 0.253                          | 2902.06            | 733.42             | 0.168                          | 2086.89            | 349.89             |
| A_68_P21129593 | chr2:34609363-34609407                            | NM_025709:1368    | Gapvd1     | INSIDE                 | 0.652                                                        | 0.272                          | 4319.16            | 1175.04            | 0.177                          | 3142.20            | 557.06             |
| A_68_P22522346 | chr3:129533887-129533931                          | NM_026578:406     | Gar1       | INSIDE                 | 0.433                                                        | 0.204                          | 2666.52            | 543.73             | 0.088                          | 1986.14            | 175.51             |
| A_68_P24466829 | chr6:54988330-54988374                            | NM_180678:358     | Gars       | INSIDE                 | 0.622                                                        | 0.265                          | 2550.94            | 677.06             | 0.165                          | 1923.10            | 317.45             |

| ProbeName      | Target position of probe on CpG island microarray | TargetID          | GeneSymbol | CpG island Description | Ratio of relative methylation (TiO <sub>2</sub> -NP/Vehicle) | Sham group                     |                    |                    | TiO <sub>2</sub> -H group      |                    |                    |
|----------------|---------------------------------------------------|-------------------|------------|------------------------|--------------------------------------------------------------|--------------------------------|--------------------|--------------------|--------------------------------|--------------------|--------------------|
|                |                                                   |                   |            |                        |                                                              | Relative methylation (Cy5/Cy3) | Cy3 signal (Input) | Cy5 signal (MeDIP) | Relative methylation (Cy5/Cy3) | Cy3 signal (Input) | Cy5 signal (MeDIP) |
| A_68_P27561184 | chr11:4965305-4965349                             | NM_001190406:4    | Gas21l     | INSIDE                 | 0.228                                                        | 30.997                         | 5880.61            | 182278.40          | 7.082                          | 6315.26            | 44723.20           |
| A_68_P27561149 | chr11:4961389-4961433                             | NM_001190406:3920 | Gas21l     | INSIDE                 | 0.358                                                        | 0.467                          | 3323.39            | 1551.09            | 0.167                          | 2316.28            | 386.88             |
| A_68_P27561153 | chr11:4961885-4961929                             | NM_001190406:3424 | Gas21l     | INSIDE                 | 0.619                                                        | 0.677                          | 1434.71            | 971.99             | 0.419                          | 1094.47            | 459.05             |
| A_68_P27561152 | chr11:4961738-4961782                             | NM_001190406:3570 | Gas21l     | INSIDE                 | 0.403                                                        | 1.435                          | 1879.76            | 2698.34            | 0.578                          | 1397.91            | 807.91             |
| A_68_P20769690 | chr1:162964920-162964964                          | NR_002840:-354    | Gas5       | DIVERGENT_PROMOTER     | 0.27                                                         | 0.420                          | 4540.97            | 1909.28            | 0.114                          | 3460.19            | 393.32             |
| A_68_P20769692 | chr1:162965131-162965175                          | NR_002840:-144    | Gas5       | DIVERGENT_PROMOTER     | 0.272                                                        | 7.720                          | 2261.90            | 17462.71           | 2.1                            | 1713.50            | 3598.47            |
| A_68_P25668725 | chr8:13494426-13494470                            | NM_019521:87      | Gas6       | INSIDE                 | 0.292                                                        | 0.330                          | 3199.94            | 1055.89            | 0.096                          | 2366.19            | 227.66             |
| A_68_P24620292 | chr6:88140898-88140951                            | NM_008090:-7733   | Gata2      | PROMOTER               | 0.026                                                        | 8.546                          | 1561.74            | 13346.42           | 0.224                          | 1150.55            | 257.71             |
| A_68_P24620367 | chr6:88149612-88149656                            | NM_008090:977     | Gata2      | INSIDE                 | 0.495                                                        | 3.533                          | 2392.40            | 8452.21            | 1.748                          | 2057.41            | 3595.44            |
| A_68_P24620288 | chr6:88140437-88140481                            | NM_008090:-8199   | Gata2      | PROMOTER               | 0.508                                                        | 4.881                          | 3206.69            | 15650.88           | 2.479                          | 2575.13            | 6383.56            |
| A_68_P24620316 | chr6:88143988-88144032                            | NM_008090:-4647   | Gata2      | PROMOTER               | 0.541                                                        | 5.843                          | 2143.77            | 12525.75           | 3.163                          | 1795.02            | 5678.02            |
| A_68_P24620291 | chr6:88140777-88140827                            | NM_008090:-7855   | Gata2      | PROMOTER               | 0.117                                                        | 1.640                          | 1269.70            | 2082.58            | 0.192                          | 915.53             | 175.58             |
| A_68_P24620282 | chr6:88139868-88139912                            | NM_008090:-8767   | Gata2      | PROMOTER               | 0.555                                                        | 0.636                          | 1562.10            | 994.00             | 0.353                          | 1359.45            | 480.16             |
| A_68_P24620345 | chr6:88147159-88147203                            | NM_008090:-1477   | Gata2      | PROMOTER               | 0.518                                                        | 3.659                          | 891.72             | 3262.82            | 1.896                          | 739.99             | 1402.79            |
| A_68_P20997431 | chr2:9796515-9796559                              | NM_008091:3691    | Gata3      | INSIDE                 | 0.661                                                        | 4.341                          | 5467.48            | 23734.93           | 2.869                          | 4250.59            | 12193.23           |
| A_68_P29660043 | chr14:63859471-63859515                           | NM_008092:4605    | Gata4      | INSIDE                 | 0.282                                                        | 10.779                         | 1424.85            | 15358.87           | 3.036                          | 1502.62            | 4562.46            |
| A_68_P29660136 | chr14:63870354-63870398                           | NM_008092:-6279   | Gata4      | PROMOTER               | 0.365                                                        | 0.373                          | 2569.19            | 958.26             | 0.136                          | 1877.55            | 255.90             |
| A_68_P29660046 | chr14:63859832-63859876                           | NM_008092:4243    | Gata4      | INSIDE                 | 0.619                                                        | 3.742                          | 900.18             | 3368.69            | 2.315                          | 899.96             | 2083.61            |
| A_68_P29660080 | chr14:63863910-63863954                           | NM_008092:165     | Gata4      | INSIDE                 | 0.547                                                        | 3.219                          | 1127.01            | 3627.81            | 1.761                          | 917.65             | 1615.93            |
| A_68_P21903062 | chr2:180068497-180068541                          | NM_008093:866     | Gata5      | INSIDE                 | 0.529                                                        | 4.680                          | 784.04             | 3669.63            | 2.474                          | 726.50             | 1797.46            |
| A_68_P31493063 | chr18:11054641-11054685                           | NM_010258:2155    | Gata6      | INSIDE                 | 0.554                                                        | 4.031                          | 912.64             | 3678.79            | 2.233                          | 817.62             | 1825.38            |
| A_68_P31493066 | chr18:11054906-11054950                           | NM_010258:2421    | Gata6      | INSIDE                 | 0.559                                                        | 7.659                          | 2562.46            | 19626.71           | 4.279                          | 2096.68            | 8970.77            |
| A_68_P31493065 | chr18:11054816-11054860                           | NM_010258:2331    | Gata6      | INSIDE                 | 0.55                                                         | 3.366                          | 1109.21            | 3733.28            | 1.85                           | 995.55             | 1841.84            |
| A_68_P31493046 | chr18:11052798-11052842                           | NM_010258:313     | Gata6      | INSIDE                 | 0.123                                                        | 2.841                          | 956.35             | 2717.13            | 0.351                          | 809.26             | 283.89             |
| A_68_P25949121 | chr8:72498323-72498367                            | NM_001113346:-62  | Gatad2a    | PROMOTER               | 0.458                                                        | 11.577                         | 4190.62            | 48514.25           | 5.297                          | 3625.57            | 19204.65           |
| A_68_P24111498 | chr5:134575433-134575477                          | NM_030719:-163    | Gatsl2     | PROMOTER               | 0.249                                                        | 11.990                         | 1179.42            | 14140.74           | 2.982                          | 1212.40            | 3615.48            |
| A_68_P27556422 | chr11:4118442-4118486                             | NM_028022:211     | Gatsl3     | INSIDE                 | 0.398                                                        | 19.020                         | 1337.68            | 25442.36           | 7.567                          | 1130.11            | 8551.50            |
| A_68_P27556420 | chr11:4118164-4118208                             | NM_028022:-67     | Gatsl3     | PROMOTER               | 0.482                                                        | 5.606                          | 4072.71            | 22833.39           | 2.704                          | 3340.03            | 9032.55            |
| A_68_P27556423 | chr11:4118542-4118586                             | NM_028022:311     | Gatsl3     | INSIDE                 | 0.658                                                        | 0.677                          | 1738.17            | 1177.53            | 0.446                          | 1537.93            | 685.86             |
| A_68_P30849196 | chr16:70314241-70314285                           | NM_028803:-69     | Gbe1       | PROMOTER               | 0.362                                                        | 6.078                          | 2664.57            | 16195.37           | 2.201                          | 2393.22            | 5267.64            |
| A_68_P30849195 | chr16:70314120-70314164                           | NM_028803:-189    | Gbe1       | PROMOTER               | 0.598                                                        | 3.136                          | 2105.27            | 6601.98            | 1.875                          | 1731.07            | 3246.56            |
| A_68_P20432927 | chr1:91819381-91819425                            | NM_010262:8349    | Gbx2       | DOWNSTREAM             | 0.238                                                        | 35.625                         | 1750.91            | 62376.73           | 8.481                          | 3320.42            | 28160.92           |
| A_68_P20432996 | chr1:91827206-91827250                            | NM_010262:523     | Gbx2       | INSIDE                 | 0.373                                                        | 4.144                          | 4490.63            | 18610.07           | 1.546                          | 3521.21            | 5443.08            |
| A_68_P20432981 | chr1:91825501-91825545                            | NM_010262:2229    | Gbx2       | INSIDE                 | 0.551                                                        | 2.905                          | 1336.63            | 3882.95            | 1.6                            | 1172.01            | 1875.61            |
| A_68_P21270820 | chr2:62502454-62502498                            | NM_145523:93      | Gca        | INSIDE                 | 0.633                                                        | 0.491                          | 1226.25            | 602.09             | 0.311                          | 896.10             | 278.42             |
| A_68_P21270819 | chr2:62502267-62502311                            | NM_145523:-95     | Gca        | PROMOTER               | 0.561                                                        | 2.927                          | 2441.42            | 7145.55            | 1.641                          | 1956.78            | 3210.56            |
| A_68_P30960667 | chr16:91044987-91045031                           | NM_026110:-384    | Gcfc1      | PROMOTER               | 0.194                                                        | 13.540                         | 1639.79            | 22202.91           | 2.627                          | 1341.35            | 3523.62            |
| A_68_P21568184 | chr2:118993532-118993576                          | NM_177157:31      | Gchfr      | INSIDE                 | 0.414                                                        | 6.675                          | 2422.91            | 16172.69           | 2.765                          | 2299.42            | 6356.93            |
| A_68_P22481380 | chr3:121949179-121949223                          | NM_008129:691     | Gclm       | INSIDE                 | 0.636                                                        | 0.628                          | 854.72             | 536.92             | 0.399                          | 693.97             | 277.08             |
| A_68_P24010273 | chr5:116015592-116015636                          | NM_172719:343     | Gcn1ll     | INSIDE                 | 0.375                                                        | 0.376                          | 1579.65            | 593.63             | 0.141                          | 1253.55            | 176.89             |
| A_68_P31985486 | chr19:17431193-17431237                           | NM_173442:-57     | Gent1      | PROMOTER               | 0.267                                                        | 7.135                          | 4674.89            | 33356.77           | 1.908                          | 4288.84            | 8183.35            |
| A_68_P22367899 | chr3:99966585-99966629                            | NM_010269:166     | Gdap2      | INSIDE                 | 0.406                                                        | 1.630                          | 2820.59            | 4598.57            | 0.661                          | 2278.58            | 1506.63            |
| A_68_P25459669 | chr7:125849289-125849333                          | NM_019580:-58     | Gde1       | DIVERGENT_PROMOTER     | 0.466                                                        | 5.810                          | 2536.44            | 14736.27           | 2.708                          | 1958.48            | 5303.74            |
| A_68_P25951136 | chr8:72854054-72854098                            | NM_008107:413     | Gdf1       | INSIDE                 | 0.617                                                        | 2.689                          | 870.64             | 2340.93            | 1.659                          | 696.33             | 1155.04            |
| A_68_P29526837 | chr14:34736673-34736717                           | NM_145741:-78     | Gdf10      | PROMOTER               | 0.552                                                        | 4.409                          | 3318.05            | 14630.38           | 2.434                          | 2730.66            | 6646.48            |
| A_68_P27543728 | chr10:128328158-128328202                         | NM_010272:594     | Gdf11      | INSIDE                 | 0.545                                                        | 0.588                          | 2530.20            | 1488.68            | 0.32                           | 1928.98            | 618.00             |

| ProbeName      | Target position of probe on CpG island microarray | TargetID         | GeneSymbol | CpG island Description | Ratio of relative methylation (TiO <sub>2</sub> -NP/Vehicle) | Sham group                     |                    |                    | TiO <sub>2</sub> -H group      |                    |                    |
|----------------|---------------------------------------------------|------------------|------------|------------------------|--------------------------------------------------------------|--------------------------------|--------------------|--------------------|--------------------------------|--------------------|--------------------|
|                |                                                   |                  |            |                        |                                                              | Relative methylation (Cy5/Cy3) | Cy3 signal (Input) | Cy5 signal (MeDIP) | Relative methylation (Cy5/Cy3) | Cy3 signal (Input) | Cy5 signal (MeDIP) |
| A_68_P22722447 | chr4:9771366-9771410                              | NM_013526:-130   | Gdf6       | PROMOTER               | 0.324                                                        | 5.839                          | 23323.31           | 136191.10          | 1.891                          | 17517.31           | 33128.66           |
| A_68_P22722446 | chr4:9771240-9771284                              | NM_013526:-256   | Gdf6       | PROMOTER               | 0.494                                                        | 0.607                          | 1330.65            | 807.90             | 0.3                            | 1119.98            | 335.61             |
| A_68_P22722448 | chr4:9771474-9771518                              | NM_013526:-22    | Gdf6       | PROMOTER               | 0.49                                                         | 3.221                          | 2599.45            | 8373.76            | 1.58                           | 2223.16            | 3511.75            |
| A_68_P28221329 | chr12:8309070-8309114                             | NM_013527:-332   | Gdf7       | PROMOTER               | 0.09                                                         | 20.305                         | 6061.23            | 123070.60          | 1.818                          | 5200.90            | 9453.14            |
| A_68_P29996479 | chr15:7760686-7760730                             | NM_010275:-302   | Gdnf       | PROMOTER               | 0.563                                                        | 22.032                         | 1220.67            | 26893.79           | 12.408                         | 1141.06            | 14157.80           |
| A_68_P29996481 | chr15:7760813-7760857                             | NM_010275:-176   | Gdnf       | PROMOTER               | 0.607                                                        | 8.241                          | 1273.89            | 10497.94           | 4.999                          | 1036.16            | 5180.26            |
| A_68_P29996501 | chr15:7762967-7763011                             | NM_010275:1978   | Gdnf       | INSIDE                 | 0.626                                                        | 0.281                          | 2639.98            | 743.13             | 0.176                          | 1961.07            | 345.74             |
| A_68_P29996473 | chr15:7760094-7760138                             | NM_010275:-894   | Gdnf       | PROMOTER               | 0.431                                                        | 0.510                          | 922.07             | 470.15             | 0.22                           | 789.18             | 173.57             |
| A_68_P29996524 | chr15:7765607-7765652                             | NM_010275:4619   | Gdnf       | INSIDE                 | 0.428                                                        | 0.541                          | 1038.98            | 561.84             | 0.231                          | 765.72             | 177.05             |
| A_68_P27992419 | chr11:86887561-86887605                           | NM_025638:57     | Gdpd1      | INSIDE                 | 0.627                                                        | 2.928                          | 1012.82            | 2965.10            | 1.835                          | 740.62             | 1358.83            |
| A_68_P25361481 | chr7:106530607-106530651                          | NM_201352:570    | Gdpd5      | INSIDE                 | 0.528                                                        | 0.561                          | 1639.40            | 919.75             | 0.296                          | 1222.98            | 361.97             |
| A_68_P27930669 | chr11:76030890-76030934                           | NM_177367:162    | Gemin4     | INSIDE                 | 0.631                                                        | 0.598                          | 1083.90            | 648.45             | 0.378                          | 962.65             | 363.40             |
| A_68_P24994094 | chr7:20158457-20158510                            | NM_027189:209    | Gemin7     | INSIDE                 | 0.499                                                        | 0.581                          | 755.56             | 439.27             | 0.29                           | 606.39             | 176.08             |
| A_68_P28237416 | chr12:11272565-11272609                           | NM_177331:7      | Gen1       | INSIDE                 | 0.466                                                        | 0.465                          | 2466.98            | 1147.70            | 0.217                          | 1801.37            | 390.55             |
| A_68_P28082095 | chr11:102754803-102754847                         | NM_010277:3690   | Gfap       | INSIDE                 | 0.464                                                        | 0.648                          | 1072.49            | 695.48             | 0.301                          | 743.69             | 223.94             |
| A_68_P23968440 | chr5:108154062-108154106                          | NM_010278:-721   | Gfi1       | PROMOTER               | 0.471                                                        | 0.339                          | 1534.89            | 521.01             | 0.16                           | 1094.55            | 174.91             |
| A_68_P23968450 | chr5:108155208-108155253                          | NM_010278:-1867  | Gfi1       | PROMOTER               | 0.477                                                        | 6.014                          | 692.06             | 4161.92            | 2.867                          | 516.34             | 1480.28            |
| A_68_P23968426 | chr5:108152356-108152400                          | NM_010278:985    | Gfi1       | INSIDE                 | 0.639                                                        | 0.178                          | 3371.59            | 601.63             | 0.114                          | 2289.08            | 261.20             |
| A_68_P26135759 | chr8:108282466-108282510                          | NM_027469:19     | Gfod2      | INSIDE                 | 0.652                                                        | 2.465                          | 1592.62            | 3925.56            | 1.607                          | 1141.70            | 1834.72            |
| A_68_P24613524 | chr6:86992684-86992728                            | NM_013528:-133   | Gfpt1      | PROMOTER               | 0.662                                                        | 4.107                          | 1151.38            | 4728.38            | 2.717                          | 1014.21            | 2755.70            |
| A_68_P27784883 | chr11:49607746-49607790                           | NM_013529:112    | Gfpt2      | INSIDE                 | 0.582                                                        | 0.417                          | 1646.30            | 686.87             | 0.243                          | 1194.95            | 290.24             |
| A_68_P27784886 | chr11:49608055-49608100                           | NM_013529:421    | Gfpt2      | INSIDE                 | 0.627                                                        | 0.222                          | 2188.53            | 486.49             | 0.139                          | 1581.26            | 220.55             |
| A_68_P32213514 | chr19:58529502-58529546                           | NM_010279:-568   | Gfra1      | PROMOTER               | 0.496                                                        | 0.190                          | 2363.86            | 448.47             | 0.094                          | 1780.92            | 167.50             |
| A_68_P32213516 | chr19:58529694-58529738                           | NM_010279:-760   | Gfra1      | PROMOTER               | 0.578                                                        | 0.236                          | 3058.91            | 720.64             | 0.136                          | 2108.65            | 287.35             |
| A_68_P29703989 | chr14:71289781-71289825                           | NM_008115:-134   | Gfra2      | PROMOTER               | 0.318                                                        | 19.731                         | 2080.46            | 41049.71           | 6.275                          | 1854.56            | 11638.09           |
| A_68_P28154359 | chr11:115465196-115465240                         | NM_173048:2      | Gga3       | INSIDE                 | 0.521                                                        | 7.300                          | 844.03             | 6161.44            | 3.801                          | 721.44             | 2741.93            |
| A_68_P22767955 | chr4:19969272-19969316                            | NM_010281:96     | Ggh        | INSIDE                 | 0.309                                                        | 7.466                          | 667.75             | 4985.63            | 2.306                          | 650.39             | 1499.54            |
| A_68_P22767953 | chr4:19968999-19969043                            | NM_010281:-178   | Ggh        | PROMOTER               | 0.477                                                        | 0.470                          | 1889.06            | 887.65             | 0.224                          | 1463.79            | 327.91             |
| A_68_P25025741 | chr7:29956446-29956490                            | NM_182696:1060   | Ggn        | INSIDE                 | 0.228                                                        | 1.939                          | 2967.74            | 5753.56            | 0.442                          | 2459.62            | 1087.28            |
| A_68_P25025751 | chr7:29957972-29958016                            | NM_182696:2586   | Ggn        | INSIDE                 | 0.227                                                        | 1.631                          | 2582.70            | 4212.72            | 0.37                           | 1775.81            | 656.58             |
| A_68_P25025743 | chr7:29956717-29956761                            | NM_182696:1330   | Ggn        | INSIDE                 | 0.218                                                        | 3.302                          | 4130.19            | 13639.94           | 0.72                           | 2597.12            | 1870.93            |
| A_68_P28836952 | chr13:14155652-14155696                           | NM_010282:-6     | Ggps1      | DIVERGENT_PROMOTER     | 0.429                                                        | 0.233                          | 2713.51            | 631.73             | 0.1                            | 1778.55            | 177.77             |
| A_68_P21765995 | chr2:155340656-155340700                          | NM_144786:-96    | Ggt7       | DIVERGENT_PROMOTER     | 0.327                                                        | 11.316                         | 768.11             | 8691.89            | 3.697                          | 645.31             | 2385.79            |
| A_68_P21765994 | chr2:155340501-155340545                          | NM_144786:60     | Ggt7       | INSIDE                 | 0.498                                                        | 3.950                          | 1611.98            | 6366.81            | 1.968                          | 1388.55            | 2733.22            |
| A_68_P29543501 | chr14:37948355-37948400                           | NM_001199122:-52 | Ghitm      | PROMOTER               | 0.604                                                        | 0.538                          | 1256.15            | 675.88             | 0.325                          | 1012.40            | 329.06             |
| A_68_P29975444 | chr15:3533365-3533409                             | NM_010284:-156   | Ghr        | PROMOTER               | 0.399                                                        | 17.326                         | 1091.49            | 18911.05           | 6.907                          | 979.34             | 6764.21            |
| A_68_P22010771 | chr3:27271350-27271394                            | NM_177330:1100   | Ghsr       | INSIDE                 | 0.409                                                        | 0.282                          | 3197.08            | 901.15             | 0.115                          | 2083.48            | 240.35             |
| A_68_P22010766 | chr3:27270872-27270916                            | NM_177330:622    | Ghsr       | INSIDE                 | 0.541                                                        | 0.463                          | 2069.29            | 957.84             | 0.25                           | 1554.93            | 389.18             |
| A_68_P22010767 | chr3:27270950-27270994                            | NM_177330:700    | Ghsr       | INSIDE                 | 0.577                                                        | 0.299                          | 1597.62            | 477.37             | 0.172                          | 1050.59            | 181.02             |
| A_68_P24126098 | chr5:137952294-137952338                          | NM_031408:-7791  | Gigyf1     | DIVERGENT_PROMOTER     | 0.568                                                        | 3.085                          | 3504.39            | 10812.43           | 1.751                          | 2773.02            | 4855.83            |
| A_68_P20417068 | chr1:89223852-89223896                            | NM_001110212:271 | Gigyf2     | INSIDE                 | 0.611                                                        | 7.190                          | 1615.62            | 11617.02           | 4.396                          | 1409.91            | 6197.48            |
| A_68_P20417070 | chr1:89224090-89224134                            | NM_001110212:509 | Gigyf2     | INSIDE                 | 0.625                                                        | 4.583                          | 920.16             | 4217.36            | 2.864                          | 794.55             | 2275.68            |
| A_68_P26221254 | chr8:123113358-123113402                          | NM_178856:-405   | Gins2      | PROMOTER               | 0.382                                                        | 21.160                         | 4111.26            | 86994.01           | 8.073                          | 3539.38            | 28575.03           |
| A_68_P26221250 | chr8:123112916-123112960                          | NM_178856:37     | Gins2      | INSIDE                 | 0.474                                                        | 3.286                          | 2756.27            | 9056.83            | 1.558                          | 2285.32            | 3560.88            |
| A_68_P26084323 | chr8:98157470-98157514                            | NM_030198:34     | Gins3      | INSIDE                 | 0.499                                                        | 0.294                          | 1992.07            | 586.42             | 0.147                          | 1539.97            | 226.43             |
| A_68_P27288983 | chr10:80800571-80800615                           | NM_148951:5419   | Gipc3      | INSIDE                 | 0.347                                                        | 9.819                          | 2168.99            | 21297.23           | 3.408                          | 1888.36            | 6434.75            |

| ProbeName      | Target position of probe on CpG island microarray | TargetID           | GeneSymbol | CpG island Description | Ratio of relative methylation (TiO <sub>2</sub> -NP/Vehicle) | Sham group                     |                    |                    | TiO <sub>2</sub> -H group      |                    |                    |
|----------------|---------------------------------------------------|--------------------|------------|------------------------|--------------------------------------------------------------|--------------------------------|--------------------|--------------------|--------------------------------|--------------------|--------------------|
|                |                                                   |                    |            |                        |                                                              | Relative methylation (Cy5/Cy3) | Cy3 signal (Input) | Cy5 signal (MeDIP) | Relative methylation (Cy5/Cy3) | Cy3 signal (Input) | Cy5 signal (MeDIP) |
| A_68_P27289008 | chr10:80806150-80806194                           | NM_148951:-161     | Gipc3      | PROMOTER               | 0.252                                                        | 2.574                          | 5183.04            | 13339.99           | 0.648                          | 3959.80            | 2567.02            |
| A_68_P27937920 | chr11:77307416-77307460                           | NM_001004144:525   | Git1       | INSIDE                 | 0.548                                                        | 3.232                          | 3497.56            | 11302.98           | 1.772                          | 2764.12            | 4898.37            |
| A_68_P29625743 | chr14:57655656-57655700                           | NM_016975:21104    | Gja3       | INSIDE                 | 0.599                                                        | 3.763                          | 1509.15            | 5678.80            | 2.256                          | 1052.85            | 2375.03            |
| A_68_P32563826 | chrX:98580104-98580148                            | NM_008124:7451     | Gjb1       | INSIDE                 | 0.38                                                         | 9.532                          | 430.33             | 4101.74            | 3.623                          | 607.47             | 2201.16            |
| A_68_P29626122 | chr14:57723066-57723110                           | NM_008125:451      | Gjb2       | INSIDE                 | 0.526                                                        | 0.593                          | 2017.74            | 1197.51            | 0.312                          | 1571.07            | 490.77             |
| A_68_P28059762 | chr11:98843848-98843892                           | NM_178596:460      | Gjd3       | INSIDE                 | 0.658                                                        | 5.536                          | 596.58             | 3302.56            | 3.642                          | 553.31             | 2015.35            |
| A_68_P29072412 | chr13:58376159-58376204                           | NM_019832:-632     | Gkap1      | PROMOTER               | 0.127                                                        | 2.655                          | 1362.62            | 3617.64            | 0.337                          | 970.98             | 326.88             |
| A_68_P26844443 | chr9:114310274-114310318                          | NM_009752:60       | Glb1       | INSIDE                 | 0.492                                                        | 0.266                          | 4618.31            | 1227.16            | 0.131                          | 3057.03            | 399.89             |
| A_68_P24226577 | chr6:8460033-8460077                              | NM_133236:459      | Glccl1     | INSIDE                 | 0.583                                                        | 4.831                          | 1617.13            | 7812.71            | 2.817                          | 1349.88            | 3802.65            |
| A_68_P24226570 | chr6:8459130-8459177                              | NM_133236:-442     | Glccl1     | PROMOTER               | 0.488                                                        | 0.560                          | 881.44             | 493.78             | 0.273                          | 798.76             | 218.36             |
| A_68_P26167381 | chr8:113782707-113782751                          | NM_009149:374      | Glg1       | INSIDE                 | 0.599                                                        | 0.406                          | 1237.06            | 502.04             | 0.243                          | 1150.52            | 279.70             |
| A_68_P26167383 | chr8:113783057-113783101                          | NM_009149:24       | Glg1       | INSIDE                 | 0.661                                                        | 13.766                         | 2316.15            | 31884.71           | 9.096                          | 2359.23            | 21458.40           |
| A_68_P23190563 | chr4:107107680-107107724                          | NM_147221:379      | Glis1      | INSIDE                 | 0.477                                                        | 3.690                          | 1564.37            | 5772.69            | 1.76                           | 1365.98            | 2404.64            |
| A_68_P23190564 | chr4:107107777-107107821                          | NM_147221:475      | Glis1      | INSIDE                 | 0.617                                                        | 0.601                          | 771.05             | 463.15             | 0.371                          | 690.12             | 255.97             |
| A_68_P32048649 | chr19:28752873-28752917                           | NM_175459:1673     | Glis3      | INSIDE                 | 0.461                                                        | 0.396                          | 2310.71            | 915.11             | 0.183                          | 1807.64            | 330.17             |
| A_68_P31136610 | chr17:31038660-31038704                           | NM_021332:-129     | Glp1r      | PROMOTER               | 0.512                                                        | 7.204                          | 1567.97            | 11295.01           | 3.688                          | 1380.01            | 5089.48            |
| A_68_P22271218 | chr3:80717646-80717690                            | NM_010298:-122     | Glrb       | PROMOTER               | 0.411                                                        | 8.709                          | 3164.68            | 27560.49           | 3.582                          | 2354.69            | 8433.32            |
| A_68_P20226307 | chr1:52289184-52289228                            | NM_001081081:870   | Gls        | INSIDE                 | 0.638                                                        | 3.774                          | 1498.09            | 5653.57            | 2.408                          | 1254.88            | 3021.53            |
| A_68_P20226306 | chr1:52289040-52289084                            | NM_001081081:1014  | Gls        | INSIDE                 | 0.503                                                        | 0.552                          | 1003.87            | 554.19             | 0.278                          | 800.54             | 222.38             |
| A_68_P27540020 | chr10:127631671-127631715                         | NM_001033264:2     | Gls2       | INSIDE                 | 0.494                                                        | 4.376                          | 1413.43            | 6184.64            | 2.162                          | 1217.09            | 2630.92            |
| A_68_P27540023 | chr10:127631990-127632034                         | NM_001033264:322   | Gls2       | INSIDE                 | 0.512                                                        | 0.690                          | 2514.21            | 1735.23            | 0.353                          | 1986.39            | 701.87             |
| A_68_P25957809 | chr8:74135189-74135233                            | NM_146211:288      | Glt25d1    | INSIDE                 | 0.561                                                        | 4.594                          | 1144.94            | 5259.29            | 2.578                          | 916.92             | 2364.07            |
| A_68_P25957808 | chr8:74135004-74135048                            | NM_146211:104      | Glt25d1    | INSIDE                 | 0.617                                                        | 4.619                          | 1507.38            | 6961.87            | 2.85                           | 1270.62            | 3621.13            |
| A_68_P20720545 | chr1:154247264-154247308                          | NM_177756:290      | Glt25d2    | INSIDE                 | 0.245                                                        | 1.681                          | 945.35             | 1589.56            | 0.411                          | 823.88             | 338.73             |
| A_68_P22299774 | chr3:85691661-85691705                            | NM_177130:-242     | Glt28d2    | PROMOTER               | 0.142                                                        | 36.209                         | 1929.94            | 69880.48           | 5.145                          | 1886.60            | 9706.08            |
| A_68_P29529251 | chr14:35124024-35124068                           | NM_008133:134      | Glod1      | INSIDE                 | 0.227                                                        | 10.189                         | 2528.48            | 25763.31           | 2.309                          | 2187.17            | 5049.12            |
| A_68_P29529256 | chr14:35124536-35124580                           | NM_008133:646      | Glod1      | INSIDE                 | 0.38                                                         | 4.774                          | 2822.10            | 13473.25           | 1.816                          | 2448.32            | 4446.40            |
| A_68_P30347362 | chr15:76125061-76125105                           | NM_001195537:219   | Gm10345    | INSIDE                 | 0.51                                                         | 0.715                          | 1438.60            | 1028.17            | 0.365                          | 1251.41            | 456.52             |
| A_68_P30347360 | chr15:76124857-76124901                           | NM_001195537:15    | Gm10345    | INSIDE                 | 0.643                                                        | 0.626                          | 1141.46            | 715.00             | 0.403                          | 933.41             | 375.72             |
| A_68_P20941836 | chr1:193960762-193960806                          | NR_033536:5        | Gm10516    | INSIDE                 | 0.165                                                        | 10.464                         | 1965.20            | 20564.72           | 1.727                          | 1614.02            | 2787.08            |
| A_68_P25533783 | chr7:139508008-139508052                          | NR_028578:684      | Gm10584    | INSIDE                 | 0.178                                                        | 13.059                         | 1087.11            | 14196.28           | 2.331                          | 787.91             | 1836.38            |
| A_68_P27267011 | chr10:76721843-76721887                           | NR_026944:104      | Gm10941    | INSIDE                 | 0.564                                                        | 0.618                          | 2224.01            | 1375.12            | 0.349                          | 1649.58            | 575.10             |
| A_68_P22737302 | chr4:12833974-12834018                            | NM_001171801:13    | Gm11818    | INSIDE                 | 0.382                                                        | 12.115                         | 1598.48            | 19364.76           | 4.628                          | 1648.33            | 7629.20            |
| A_68_P22737304 | chr4:12834151-12834195                            | NM_001171801:189   | Gm11818    | INSIDE                 | 0.45                                                         | 4.623                          | 645.52             | 2984.57            | 2.083                          | 624.18             | 1300.08            |
| A_68_P28058704 | chr11:98671394-98671438                           | NR_033551:-13      | Gm12359    | PROMOTER               | 0.468                                                        | 8.199                          | 8459.75            | 69358.97           | 3.836                          | 6892.18            | 26436.53           |
| A_68_P28058705 | chr11:98671479-98671523                           | NR_033551:-97      | Gm12359    | PROMOTER               | 0.609                                                        | 0.501                          | 911.00             | 456.68             | 0.305                          | 651.64             | 199.05             |
| A_68_P23219033 | chr4:114079567-114079611                          | NM_001085549:260   | Gm12824    | INSIDE                 | 0.517                                                        | 0.641                          | 3355.45            | 2151.91            | 0.332                          | 2660.09            | 881.91             |
| A_68_P20122141 | chr1:31006006-31006050                            | NR_002688:527      | Gm13363    | INSIDE                 | 0.499                                                        | 6.899                          | 1128.03            | 7781.86            | 3.445                          | 928.23             | 3197.50            |
| A_68_P21565618 | chr2:118529436-118529480                          | NM_001081971:241   | Gm1337     | INSIDE                 | 0.27                                                         | 0.493                          | 1749.84            | 862.56             | 0.133                          | 1312.43            | 174.78             |
| A_68_P21565620 | chr2:118529638-118529682                          | NM_001081971:39    | Gm1337     | INSIDE                 | 0.433                                                        | 7.013                          | 903.27             | 6334.40            | 3.04                           | 811.92             | 2468.17            |
| A_68_P21565608 | chr2:118528286-118528330                          | NM_001081971:1391  | Gm1337     | INSIDE                 | 0.579                                                        | 0.358                          | 1867.84            | 669.00             | 0.207                          | 1376.07            | 285.47             |
| A_68_P21052792 | chr2:20891136-20891180                            | NR_033225:658      | Gm13375    | INSIDE                 | 0.537                                                        | 6.748                          | 1780.96            | 12018.05           | 3.627                          | 1518.60            | 5507.25            |
| A_68_P21052788 | chr2:20890736-20890780                            | NR_033225:258      | Gm13375    | INSIDE                 | 0.487                                                        | 3.404                          | 4511.88            | 15359.15           | 1.658                          | 3374.33            | 5596.32            |
| A_68_P21099289 | chr2:29607138-29607182                            | NM_001177392:-9887 | Gm13547    | PROMOTER               | 0.437                                                        | 0.404                          | 1351.52            | 545.48             | 0.176                          | 986.55             | 174.08             |
| A_68_P21438071 | chr2:93797315-93797359                            | NM_001145034:-79   | Gm13889    | PROMOTER               | 0.226                                                        | 9.529                          | 3199.60            | 30488.02           | 2.155                          | 2520.05            | 5431.02            |
| A_68_P21438069 | chr2:93797146-93797190                            | NM_001145034:89    | Gm13889    | INSIDE                 | 0.372                                                        | 6.775                          | 2127.62            | 14414.08           | 2.522                          | 1881.80            | 4745.47            |

| ProbeName      | Target position of probe on CpG island microarray | TargetID           | GeneSymbol | CpG island Description | Ratio of relative methylation (TiO <sub>2</sub> -NP/Vehicle) | Sham group                     |                    |                    | TiO <sub>2</sub> -H group      |                    |                    |
|----------------|---------------------------------------------------|--------------------|------------|------------------------|--------------------------------------------------------------|--------------------------------|--------------------|--------------------|--------------------------------|--------------------|--------------------|
|                |                                                   |                    |            |                        |                                                              | Relative methylation (Cy5/Cy3) | Cy3 signal (Input) | Cy5 signal (MeDIP) | Relative methylation (Cy5/Cy3) | Cy3 signal (Input) | Cy5 signal (MeDIP) |
| A_68_P25616822 | chr8:4249449-4249493                              | NM_001195258:1257  | Gm14378    | INSIDE                 | 0.434                                                        | 0.337                          | 3447.36            | 1162.98            | 0.147                          | 2555.09            | 374.40             |
| A_68_P29575892 | chr14:47000105-47000149                           | NR_037981:928      | Gm15217    | INSIDE                 | 0.489                                                        | 5.975                          | 2935.49            | 17539.11           | 2.921                          | 2243.04            | 6551.66            |
| A_68_P28080758 | chr11:102526866-102526910                         | NM_001127576:-13   | Gm1564     | PROMOTER               | 0.325                                                        | 7.711                          | 2154.14            | 16611.32           | 2.507                          | 1806.19            | 4528.10            |
| A_68_P28080759 | chr11:102527010-102527054                         | NM_001127576:131   | Gm1564     | INSIDE                 | 0.421                                                        | 4.304                          | 1459.72            | 6283.06            | 1.814                          | 1326.03            | 2405.59            |
| A_68_P28080761 | chr11:102527193-102527237                         | NM_001127576:313   | Gm1564     | INSIDE                 | 0.308                                                        | 5.381                          | 788.36             | 4241.96            | 1.657                          | 675.67             | 1119.50            |
| A_68_P28577474 | chr12:81859527-81859571                           | NM_001008423:2154  | Gm1568     | INSIDE                 | 0.55                                                         | 5.464                          | 1065.24            | 5820.79            | 3.004                          | 907.72             | 2726.34            |
| A_68_P28577469 | chr12:81858735-81858779                           | NM_001008423:2946  | Gm1568     | INSIDE                 | 0.663                                                        | 5.062                          | 1589.35            | 8045.37            | 3.355                          | 1239.57            | 4159.16            |
| A_68_P24225087 | chr6:8209485-8209529                              | NR_033518:219      | Gm16039    | INSIDE                 | 0.544                                                        | 0.251                          | 2446.14            | 613.16             | 0.136                          | 1860.92            | 253.74             |
| A_68_P27845567 | chr11:60745252-60745296                           | NR_027800:95       | Gm16516    | INSIDE                 | 0.281                                                        | 12.309                         | 950.20             | 11696.09           | 3.461                          | 742.58             | 2569.84            |
| A_68_P23591967 | chr5:34326256-34326300                            | NM_001033458:156   | Gm1673     | INSIDE                 | 0.647                                                        | 0.222                          | 4414.50            | 981.23             | 0.144                          | 3189.89            | 458.66             |
| A_68_P23591963 | chr5:34325816-34325860                            | NM_001033458:-284  | Gm1673     | PROMOTER               | 0.616                                                        | 0.721                          | 1572.43            | 1133.96            | 0.444                          | 1049.30            | 466.00             |
| A_68_P26156365 | chr8:111864724-111864768                          | NR_002928:62       | Gm1943     | INSIDE                 | 0.321                                                        | 6.015                          | 1845.53            | 11099.98           | 1.933                          | 1391.34            | 2689.21            |
| A_68_P26156364 | chr8:111864649-111864693                          | NR_002928:138      | Gm1943     | INSIDE                 | 0.328                                                        | 6.192                          | 1198.30            | 7419.66            | 2.03                           | 826.37             | 1677.93            |
| A_68_P28744405 | chr12:112724265-112724309                         | NM_001033248:-252  | Gm266      | PROMOTER               | 0.47                                                         | 0.554                          | 1026.79            | 568.84             | 0.26                           | 819.16             | 213.36             |
| A_68_P27813685 | chr11:54911498-54911542                           | NM_010299:34       | Gm2a       | INSIDE                 | 0.483                                                        | 7.685                          | 2286.38            | 17570.58           | 3.709                          | 2024.86            | 7510.07            |
| A_68_P27813684 | chr11:54911411-54911457                           | NM_010299:-52      | Gm2a       | PROMOTER               | 0.653                                                        | 2.363                          | 1578.93            | 3730.86            | 1.544                          | 1369.70            | 2114.98            |
| A_68_P21046007 | chr2:19579131-19579175                            | NR_033642:372      | Gm3230     | INSIDE                 | 0.606                                                        | 0.645                          | 2066.54            | 1333.14            | 0.391                          | 1660.51            | 649.10             |
| A_68_P25766302 | chr8:33994475-33994519                            | NM_001177589:66002 | Gm3985     | DOWNSTREAM             | 0.219                                                        | 12.170                         | 767.79             | 9343.79            | 2.669                          | 665.15             | 1775.25            |
| A_68_P25766302 | chr8:33994797-33994841                            | NM_001177589:65680 | Gm3985     | DOWNSTREAM             | 0.36                                                         | 26.085                         | 581.32             | 15163.82           | 9.392                          | 652.44             | 6127.58            |
| A_68_P25766304 | chr8:33995018-33995062                            | NM_001177589:65458 | Gm3985     | DOWNSTREAM             | 0.609                                                        | 0.476                          | 2627.00            | 1250.26            | 0.29                           | 1877.13            | 544.18             |
| A_68_P25362934 | chr7:106774303-106774347                          | NM_001195529:1289  | Gm4980     | INSIDE                 | 0.508                                                        | 0.513                          | 1501.71            | 770.63             | 0.261                          | 1134.78            | 296.10             |
| A_68_P26248333 | chr8:127422026-127422070                          | NM_001111141:263   | Gm505      | INSIDE                 | 0.567                                                        | 3.208                          | 2296.87            | 7368.00            | 1.82                           | 1889.63            | 3438.54            |
| A_68_P20875118 | chr1:182262286-182262330                          | NR_003623:-1628    | Gm5069     | PROMOTER               | 0.577                                                        | 4.951                          | 2315.80            | 11465.41           | 2.858                          | 1725.01            | 4930.61            |
| A_68_P32571132 | chrX:100129205-100129249                          | NR_026596:336      | Gm5126     | INSIDE                 | 0.604                                                        | 5.673                          | 1209.63            | 6862.38            | 3.425                          | 1425.38            | 4882.61            |
| A_68_P26587299 | chr9:65219825-65219869                            | NM_001111145:10980 | Gm514      | INSIDE                 | 0.303                                                        | 12.901                         | 3786.15            | 48846.87           | 3.913                          | 3639.38            | 14242.37           |
| A_68_P28492940 | chr12:66018887-66018931                           | NM_001025605:11    | Gm527      | INSIDE                 | 0.282                                                        | 5.863                          | 1355.77            | 7948.81            | 1.651                          | 1174.89            | 1940.03            |
| A_68_P24131920 | chr5:139296987-139297031                          | NM_001195128:975   | Gm5294     | INSIDE                 | 0.613                                                        | 0.494                          | 2073.89            | 1024.82            | 0.303                          | 1495.15            | 453.08             |
| A_68_P29751456 | chr14:79851782-79851826                           | NM_001034882:163   | Gm5465     | INSIDE                 | 0.28                                                         | 6.546                          | 3778.59            | 24735.20           | 1.831                          | 2911.44            | 5330.77            |
| A_68_P26912794 | chr10:5914339-5914383                             | NR_002891:-3014    | Gm5512     | PROMOTER               | 0.503                                                        | 0.608                          | 1349.11            | 819.68             | 0.306                          | 1077.70            | 329.38             |
| A_68_P25661493 | chr8:12431257-12431301                            | NR_027975:45508    | Gm5607     | INSIDE                 | 0.265                                                        | 15.231                         | 12003.20           | 182815.50          | 4.036                          | 12247.10           | 49429.15           |
| A_68_P25661164 | chr8:12385360-12385404                            | NR_027975:-388     | Gm5607     | PROMOTER               | 0.386                                                        | 4.110                          | 1230.54            | 5057.56            | 1.586                          | 893.83             | 1418.03            |
| A_68_P23792661 | chr5:72978442-72978486                            | NM_001024147:325   | Gm5868     | INSIDE                 | 0.229                                                        | 1.847                          | 944.96             | 1745.46            | 0.423                          | 811.47             | 343.09             |
| A_68_P30720009 | chr16:44173533-44173577                           | NM_001029889:45    | Gm608      | INSIDE                 | 0.542                                                        | 5.801                          | 1169.51            | 6784.49            | 3.142                          | 1048.72            | 3295.30            |
| A_68_P21932364 | chr3:8463041-8463085                              | NR_033512:36       | Gm6194     | INSIDE                 | 0.195                                                        | 25.196                         | 5365.55            | 135188.40          | 4.913                          | 6241.04            | 30661.47           |
| A_68_P21932363 | chr3:8462950-8462994                              | NR_033512:126      | Gm6194     | INSIDE                 | 0.338                                                        | 14.466                         | 3042.24            | 44010.47           | 4.889                          | 2523.39            | 12336.00           |
| A_68_P31458147 | chr18:3336797-3336841                             | NR_033457:405      | Gm6225     | INSIDE                 | 0.509                                                        | 0.560                          | 780.75             | 437.06             | 0.285                          | 606.60             | 172.88             |
| A_68_P29338084 | chr13:113784193-113784237                         | NM_001037914:139   | Gm6320     | INSIDE                 | 0.554                                                        | 0.401                          | 1728.83            | 693.17             | 0.222                          | 1433.39            | 318.36             |
| A_68_P29338086 | chr13:113784385-113784429                         | NM_001037914:331   | Gm6320     | INSIDE                 | 0.247                                                        | 1.460                          | 2515.61            | 3672.83            | 0.36                           | 2066.65            | 745.01             |
| A_68_P21345225 | chr2:75497497-75497541                            | NR_033513:172      | Gm6793     | INSIDE                 | 0.377                                                        | 5.666                          | 2543.00            | 14409.88           | 2.138                          | 1994.29            | 4264.24            |
| A_68_P28159316 | chr11:116295859-116295905                         | NR_003376:356      | Gm7367     | INSIDE                 | 0.257                                                        | 7.650                          | 651.77             | 4986.28            | 1.967                          | 484.36             | 952.87             |
| A_68_P31162860 | chr17:36305369-36305413                           | NM_001081032:92    | Gm8909     | INSIDE                 | 0.183                                                        | 13.072                         | 4693.47            | 61351.91           | 2.39                           | 4598.19            | 10990.42           |
| A_68_P26886028 | chr9:121766761-121766805                          | NM_001112668:-133  | Gm9790     | PROMOTER               | 0.343                                                        | 17.016                         | 4265.60            | 72584.03           | 5.842                          | 3511.22            | 20512.38           |
| A_68_P26886029 | chr9:121766854-121766898                          | NM_001112668:-227  | Gm9790     | PROMOTER               | 0.556                                                        | 3.778                          | 1727.10            | 6524.21            | 2.1                            | 1453.08            | 3051.48            |
| A_68_P31949295 | chr19:10315203-10315247                           | NM_001033481:14    | Gm98       | INSIDE                 | 0.469                                                        | 4.122                          | 3109.08            | 12814.66           | 1.934                          | 2721.18            | 5263.67            |
| A_68_P22323963 | chr3:90017329-90017373                            | NM_001190258:219   | Gm9846     | INSIDE                 | 0.532                                                        | 0.603                          | 1624.59            | 979.47             | 0.321                          | 1221.38            | 392.11             |
| A_68_P27292918 | chr10:82092906-82092950                           | NR_037190:342      | Gm9855     | INSIDE                 | 0.447                                                        | 3.555                          | 1836.65            | 6530.12            | 1.59                           | 1532.72            | 2436.96            |

| ProbeName      | Target position of probe on CpG island microarray | TargetID           | GeneSymbol | CpG island Description | Ratio of relative methylation (TiO <sub>2</sub> -NP/Vehicle) | Sham group                     |                    |                    | TiO <sub>2</sub> -H group      |                    |                    |
|----------------|---------------------------------------------------|--------------------|------------|------------------------|--------------------------------------------------------------|--------------------------------|--------------------|--------------------|--------------------------------|--------------------|--------------------|
|                |                                                   |                    |            |                        |                                                              | Relative methylation (Cy5/Cy3) | Cy3 signal (Input) | Cy5 signal (MeDIP) | Relative methylation (Cy5/Cy3) | Cy3 signal (Input) | Cy5 signal (MeDIP) |
| A_68_P21073104 | chr2:25434737-25434781                            | NM_001005424:861   | Gm996      | INSIDE                 | 0.663                                                        | 0.568                          | 3422.45            | 1944.41            | 0.377                          | 2558.14            | 964.01             |
| A_68_P25150562 | chr7:64642665-64642709                            | NR_033504:45       | Gm9962     | INSIDE                 | 0.619                                                        | 0.147                          | 3091.74            | 453.42             | 0.091                          | 2218.58            | 201.28             |
| A_68_P24611767 | chr6:86683275-86683319                            | NM_011818:76       | Gmcl1      | INSIDE                 | 0.276                                                        | 18.118                         | 5463.07            | 98982.12           | 4.994                          | 4789.71            | 23917.66           |
| A_68_P28928667 | chr13:32430111-32430155                           | NM_146041:281      | Gm5d       | INSIDE                 | 0.076                                                        | 40.359                         | 1329.57            | 53659.65           | 3.056                          | 1445.44            | 4417.57            |
| A_68_P21909702 | chr2:181022305-181022349                          | NM_198169:345      | Gmeb2      | INSIDE                 | 0.531                                                        | 2.823                          | 1962.74            | 5540.02            | 1.5                            | 1588.92            | 2383.40            |
| A_68_P29578547 | chr14:47441814-47441858                           | NM_022023:81       | Gmfb       | INSIDE                 | 0.58                                                         | 0.626                          | 787.09             | 492.84             | 0.363                          | 662.26             | 240.56             |
| A_68_P28888886 | chr13:24853737-24853781                           | NM_020567:48       | Gmnn       | INSIDE                 | 0.53                                                         | 0.736                          | 4031.54            | 2968.66            | 0.39                           | 3079.81            | 1202.00            |
| A_68_P22194401 | chr3:63780425-63780469                            | NM_001033300:382   | Gmps       | INSIDE                 | 0.394                                                        | 0.577                          | 1013.24            | 585.03             | 0.228                          | 847.48             | 192.88             |
| A_68_P24143542 | chr5:141305948-141305992                          | NM_010302:415      | Gna12      | INSIDE                 | 0.437                                                        | 0.409                          | 1381.25            | 565.33             | 0.179                          | 1133.90            | 202.97             |
| A_68_P27290145 | chr10:80965609-80965653                           | NM_010304:21340    | Gna15      | INSIDE                 | 0.367                                                        | 0.593                          | 948.70             | 562.68             | 0.217                          | 785.43             | 170.77             |
| A_68_P23510646 | chr5:17866146-17866190                            | NM_010305:63       | Gnai1      | INSIDE                 | 0.542                                                        | 5.226                          | 1238.02            | 6470.42            | 2.834                          | 1063.10            | 3013.19            |
| A_68_P26810120 | chr9:107537483-107537527                          | NM_008138:169      | Gnai2      | INSIDE                 | 0.59                                                         | 0.639                          | 1915.96            | 1224.34            | 0.377                          | 1384.35            | 522.29             |
| A_68_P31790105 | chr18:67293085-67293129                           | NM_010307:-373     | Gnai1      | PROMOTER               | 0.654                                                        | 2.449                          | 897.11             | 2197.25            | 1.602                          | 834.89             | 1337.47            |
| A_68_P26073617 | chr8:96334994-96335038                            | NM_001113384:279   | Gnao1      | INSIDE                 | 0.285                                                        | 18.185                         | 8727.79            | 158714.60          | 5.184                          | 7633.60            | 39571.44           |
| A_68_P26073619 | chr8:96335224-96335268                            | NM_001113384:509   | Gnao1      | INSIDE                 | 0.347                                                        | 0.493                          | 4341.46            | 2138.19            | 0.171                          | 2969.92            | 507.27             |
| A_68_P26073620 | chr8:96335296-96335343                            | NM_001113384:582   | Gnao1      | INSIDE                 | 0.564                                                        | 0.483                          | 4629.65            | 2235.91            | 0.273                          | 3034.71            | 827.27             |
| A_68_P21874744 | chr2:174153010-174153054                          | NR_003258:-382     | Gnas       | PROMOTER               | 0.26                                                         | 2.241                          | 5066.86            | 11357.07           | 0.582                          | 3426.22            | 1993.33            |
| A_68_P21874393 | chr2:174110277-174110321                          | NM_019690:478      | Gnas       | INSIDE                 | 0.618                                                        | 3.956                          | 2342.57            | 9267.78            | 2.444                          | 1863.83            | 4555.98            |
| A_68_P21874764 | chr2:174156135-174156179                          | NM_001077510:567   | Gnas       | INSIDE                 | 0.623                                                        | 0.289                          | 3251.12            | 940.13             | 0.18                           | 2377.04            | 428.49             |
| A_68_P21874768 | chr2:174156475-174156519                          | NM_001077510:907   | Gnas       | INSIDE                 | 0.194                                                        | 1.462                          | 5532.60            | 8089.57            | 0.283                          | 4201.30            | 1190.70            |
| A_68_P21874504 | chr2:174124338-174124382                          | NM_201617:1001     | Gnas       | INSIDE                 | 0.65                                                         | 2.705                          | 1746.33            | 4724.44            | 1.759                          | 1477.74            | 2598.71            |
| A_68_P26810382 | chr9:107578840-107578884                          | NM_008140:3061     | Gnat1      | INSIDE                 | 0.451                                                        | 0.224                          | 2309.00            | 516.24             | 0.101                          | 1730.08            | 174.28             |
| A_68_P26810381 | chr9:107578748-107578792                          | NM_008140:3153     | Gnat1      | INSIDE                 | 0.509                                                        | 0.338                          | 3276.25            | 1108.89            | 0.172                          | 2379.31            | 409.51             |
| A_68_P26810380 | chr9:107578632-107578676                          | NM_008140:3269     | Gnat1      | INSIDE                 | 0.51                                                         | 0.146                          | 3614.16            | 528.66             | 0.075                          | 2343.75            | 174.69             |
| A_68_P23438941 | chr4:154865679-154865723                          | NM_001160016:231   | Gnb1       | INSIDE                 | 0.471                                                        | 6.123                          | 2474.40            | 15150.75           | 2.882                          | 2376.96            | 6850.77            |
| A_68_P23438946 | chr4:154866208-154866252                          | NM_001160016:761   | Gnb1       | INSIDE                 | 0.586                                                        | 0.344                          | 2041.75            | 702.08             | 0.201                          | 1627.62            | 327.90             |
| A_68_P30580075 | chr16:18498740-18498784                           | NM_001081682:-98   | Gnb11      | PROMOTER               | 0.233                                                        | 11.286                         | 3899.87            | 44012.36           | 2.628                          | 3212.14            | 8442.37            |
| A_68_P30580079 | chr16:18499124-18499168                           | NM_023120:183      | Gnb11      | INSIDE                 | 0.514                                                        | 4.274                          | 1920.77            | 8208.65            | 2.198                          | 1614.58            | 3548.22            |
| A_68_P24126253 | chr5:137973169-137973213                          | NM_010312:1267     | Gnb2       | INSIDE                 | 0.396                                                        | 0.197                          | 3284.21            | 647.78             | 0.078                          | 2461.82            | 192.41             |
| A_68_P24126241 | chr5:137971926-137971970                          | NM_010312:2509     | Gnb2       | INSIDE                 | 0.611                                                        | 0.548                          | 2088.66            | 1144.83            | 0.335                          | 1629.94            | 545.61             |
| A_68_P22039054 | chr3:32515641-32515685                            | NM_013531:-205     | Gnb4       | PROMOTER               | 0.184                                                        | 1.430                          | 6565.63            | 9387.31            | 0.263                          | 4896.37            | 1286.64            |
| A_68_P22875167 | chr4:44085230-44085274                            | NM_001190414:293   | Gne        | INSIDE                 | 0.507                                                        | 5.053                          | 1838.45            | 9289.36            | 2.56                           | 1573.62            | 4028.53            |
| A_68_P22954219 | chr4:59048073-59048117                            | NM_025277:67       | Gng10      | INSIDE                 | 0.308                                                        | 8.890                          | 1152.93            | 10249.48           | 2.741                          | 1356.65            | 3718.53            |
| A_68_P22954220 | chr4:59048156-59048200                            | NM_025277:151      | Gng10      | INSIDE                 | 0.492                                                        | 8.377                          | 994.41             | 8329.70            | 4.12                           | 954.08             | 3930.83            |
| A_68_P24518615 | chr6:66846390-66846434                            | NM_001177558:-472  | Gng12      | PROMOTER               | 0.57                                                         | 4.627                          | 2125.04            | 9832.26            | 2.636                          | 1848.22            | 4871.51            |
| A_68_P28835611 | chr13:13876643-13876687                           | NM_010317:-141     | Gng4       | PROMOTER               | 0.307                                                        | 0.401                          | 1526.46            | 611.85             | 0.123                          | 1405.03            | 172.94             |
| A_68_P27286894 | chr10:80477702-80477746                           | NM_010319:-54      | Gng7       | PROMOTER               | 0.507                                                        | 0.388                          | 1199.14            | 465.42             | 0.197                          | 887.34             | 174.78             |
| A_68_P27286725 | chr10:80448582-80448626                           | NM_001038655:15506 | Gng7       | INSIDE                 | 0.612                                                        | 0.537                          | 2061.52            | 1107.00            | 0.329                          | 1708.56            | 561.29             |
| A_68_P27286724 | chr10:80448504-80448548                           | NM_001038655:15584 | Gng7       | INSIDE                 | 0.178                                                        | 9.096                          | 5126.54            | 46628.50           | 1.619                          | 4826.00            | 7812.57            |
| A_68_P24983830 | chr7:17480526-17480570                            | NM_010320:3414     | Gng8       | INSIDE                 | 0.552                                                        | 0.219                          | 2558.44            | 560.18             | 0.121                          | 1994.66            | 240.89             |
| A_68_P31162043 | chr17:36117444-36117488                           | NM_008136:567      | Gnl1       | INSIDE                 | 0.287                                                        | 0.357                          | 2156.93            | 770.19             | 0.102                          | 1689.83            | 172.90             |
| A_68_P32743829 | chrX:147451959-147452003                          | NM_198110:-115     | Gnl3l      | PROMOTER               | 0.544                                                        | 3.121                          | 1267.59            | 3956.52            | 1.699                          | 1413.60            | 2401.16            |
| A_68_P23778718 | chr5:69983636-69983680                            | NM_001038015:-134  | Gnpda2     | PROMOTER               | 0.405                                                        | 0.560                          | 1096.88            | 614.12             | 0.227                          | 972.73             | 220.33             |
| A_68_P27503065 | chr10:120802501-120802545                         | NM_029364:377      | Gns        | INSIDE                 | 0.63                                                         | 3.461                          | 1122.84            | 3885.78            | 2.179                          | 838.06             | 1826.14            |
| A_68_P23978151 | chr5:110605818-110605862                          | NM_008146:121      | Golga3     | INSIDE                 | 0.509                                                        | 0.426                          | 1742.61            | 742.32             | 0.217                          | 1273.89            | 275.98             |
| A_68_P30021002 | chr15:12251634-12251678                           | NM_025673:406      | Golph3     | INSIDE                 | 0.664                                                        | 0.549                          | 1634.20            | 896.50             | 0.364                          | 1226.02            | 446.60             |

| ProbeName      | Target position of probe on CpG island microarray | TargetID          | GeneSymbol | CpG island Description | Ratio of relative methylation (TiO <sub>2</sub> -NP/Vehicle) | Sham group                     |                    |                    | TiO <sub>2</sub> -H group      |                    |                    |
|----------------|---------------------------------------------------|-------------------|------------|------------------------|--------------------------------------------------------------|--------------------------------|--------------------|--------------------|--------------------------------|--------------------|--------------------|
|                |                                                   |                   |            |                        |                                                              | Relative methylation (Cy5/Cy3) | Cy3 signal (Input) | Cy5 signal (MeDIP) | Relative methylation (Cy5/Cy3) | Cy3 signal (Input) | Cy5 signal (MeDIP) |
| A_68_P24904258 | chr6:142336086-142336130                          | NM_025872:346     | Golt1b     | INSIDE                 | 0.455                                                        | 3.912                          | 939.07             | 3673.34            | 1.782                          | 833.84             | 1485.59            |
| A_68_P26875190 | chr9:119846515-119846559                          | NM_028976:140     | Gorasp1    | INSIDE                 | 0.605                                                        | 0.206                          | 4076.33            | 841.76             | 0.125                          | 2840.59            | 354.61             |
| A_68_P21315049 | chr2:70499932-70499976                            | NM_027352:389     | Gorasp2    | INSIDE                 | 0.39                                                         | 7.711                          | 560.01             | 4318.25            | 3.007                          | 551.75             | 1659.05            |
| A_68_P30641169 | chr16:30309242-30309286                           | NM_008148:1601    | Gp5        | INSIDE                 | 0.627                                                        | 0.718                          | 1508.68            | 1083.39            | 0.45                           | 1373.54            | 617.99             |
| A_68_P30347594 | chr15:76161371-76161427                           | NM_010331:-325    | Gpaa1      | PROMOTER               | 0.496                                                        | 0.413                          | 2862.57            | 1182.26            | 0.205                          | 1896.42            | 388.53             |
| A_68_P32191983 | chr19:55174072-55174116                           | NM_008149:-157    | Gpam       | PROMOTER               | 0.512                                                        | 0.317                          | 1548.67            | 490.50             | 0.162                          | 1244.54            | 201.69             |
| A_68_P20911845 | chr1:189039493-189039537                          | NM_026367:125     | Gpatch2    | INSIDE                 | 0.435                                                        | 0.524                          | 903.89             | 473.25             | 0.228                          | 761.05             | 173.31             |
| A_68_P23318268 | chr4:133130953-133130997                          | NM_172876:315     | Gpatch3    | INSIDE                 | 0.375                                                        | 6.933                          | 1372.63            | 9516.87            | 2.598                          | 1068.95            | 2777.19            |
| A_68_P28080239 | chr11:102417477-102417521                         | NM_001159492:-26  | Gpatch8    | PROMOTER               | 0.247                                                        | 22.248                         | 6350.92            | 141292.60          | 5.489                          | 5300.60            | 29093.34           |
| A_68_P29329250 | chr13:112279384-112279428                         | NM_001122963:843  | Gpbb1      | INSIDE                 | 0.487                                                        | 37.059                         | 9632.40            | 356965.70          | 18.055                         | 9553.14            | 172478.40          |
| A_68_P29329254 | chr13:112280052-112280096                         | NM_001122963:175  | Gpbb1      | INSIDE                 | 0.63                                                         | 0.613                          | 6139.64            | 3761.00            | 0.386                          | 3820.80            | 1473.56            |
| A_68_P20451406 | chr1:94729272-94729316                            | NM_016696:1032    | Gpc1       | INSIDE                 | 0.606                                                        | 9.419                          | 2171.26            | 20451.62           | 5.713                          | 1686.34            | 9633.36            |
| A_68_P20451396 | chr1:94727977-94728021                            | NM_016696:-264    | Gpc1       | PROMOTER               | 0.62                                                         | 0.438                          | 3142.99            | 1376.76            | 0.272                          | 2569.68            | 698.21             |
| A_68_P24129654 | chr5:138721309-138721353                          | NM_172412:-165    | Gpc2       | DIVERGENT_PROMOTER     | 0.418                                                        | 1.435                          | 3665.23            | 5258.97            | 0.599                          | 2747.01            | 1646.63            |
| A_68_P32383369 | chrX:49967083-49967127                            | NM_016697:47      | Gpc3       | INSIDE                 | 0.412                                                        | 7.590                          | 3210.43            | 24367.94           | 3.124                          | 3727.30            | 11642.36           |
| A_68_P32383368 | chrX:49966913-49966957                            | NM_016697:217     | Gpc3       | INSIDE                 | 0.571                                                        | 4.514                          | 1366.81            | 6169.90            | 2.579                          | 1517.99            | 3915.36            |
| A_68_P32383370 | chrX:49967260-49967304                            | NM_016697:-131    | Gpc3       | PROMOTER               | 0.654                                                        | 3.655                          | 6131.96            | 22412.89           | 2.391                          | 7696.73            | 18406.15           |
| A_68_P32380519 | chrX:49518713-49518757                            | NM_008150:-634    | Gpc4       | PROMOTER               | 0.334                                                        | 10.272                         | 1650.01            | 16949.59           | 3.431                          | 1706.87            | 5855.84            |
| A_68_P32380511 | chrX:49517673-49517717                            | NM_008150:406     | Gpc4       | INSIDE                 | 0.467                                                        | 4.847                          | 1072.93            | 5200.91            | 2.266                          | 1413.93            | 3204.08            |
| A_68_P29928902 | chr14:117325279-117325323                         | NM_001079844:764  | Gpc6       | INSIDE                 | 0.645                                                        | 0.631                          | 792.47             | 500.33             | 0.407                          | 613.24             | 249.71             |
| A_68_P26847149 | chr9:114843024-114843068                          | NM_175380:59      | Gpd11      | INSIDE                 | 0.353                                                        | 11.103                         | 1866.68            | 20725.45           | 3.916                          | 1836.68            | 7192.17            |
| A_68_P26847147 | chr9:114842779-114842823                          | NM_175380:305     | Gpd11      | INSIDE                 | 0.237                                                        | 2.811                          | 3387.17            | 9522.58            | 0.667                          | 2505.57            | 1672.17            |
| A_68_P32805174 | chrX:162677268-162677312                          | NM_001177961:416  | Gpm6b      | INSIDE                 | 0.388                                                        | 5.114                          | 895.95             | 4582.29            | 1.985                          | 1307.68            | 2595.77            |
| A_68_P23578383 | chr5:31797238-31797282                            | NM_133756:127     | Gpn1       | INSIDE                 | 0.592                                                        | 0.341                          | 1345.08            | 458.58             | 0.202                          | 985.84             | 198.83             |
| A_68_P23318324 | chr4:133140609-133140653                          | NM_133884:343     | Gpn2       | INSIDE                 | 0.313                                                        | 0.642                          | 1632.91            | 1049.04            | 0.201                          | 1231.47            | 247.76             |
| A_68_P32401470 | chrX:54756780-54756824                            | NM_001033360:132  | Gpr101     | INSIDE                 | 0.492                                                        | 5.001                          | 581.05             | 2905.56            | 2.462                          | 792.41             | 1950.54            |
| A_68_P32401468 | chrX:54756573-54756617                            | NM_001033360:340  | Gpr101     | INSIDE                 | 0.626                                                        | 2.434                          | 745.16             | 1813.82            | 1.525                          | 990.99             | 1510.80            |
| A_68_P21107276 | chr2:31008080-31008124                            | NM_178760:267     | Gpr107     | INSIDE                 | 0.319                                                        | 0.529                          | 1269.28            | 671.92             | 0.169                          | 1043.37            | 176.24             |
| A_68_P25580590 | chr7:147020054-147020098                          | NM_177469:4       | Gpr123     | INSIDE                 | 0.627                                                        | 0.705                          | 1574.67            | 1110.08            | 0.442                          | 1319.83            | 583.50             |
| A_68_P25736450 | chr8:28196606-28196651                            | NM_054044:316     | Gpr124     | INSIDE                 | 0.344                                                        | 29.149                         | 2976.49            | 86760.58           | 10.021                         | 2502.82            | 25081.23           |
| A_68_P25736445 | chr8:28195931-28195975                            | NM_054044:-360    | Gpr124     | PROMOTER               | 0.25                                                         | 0.609                          | 1432.91            | 872.01             | 0.152                          | 1166.24            | 177.36             |
| A_68_P23681262 | chr5:50450445-50450489                            | NM_133911:-231    | Gpr125     | PROMOTER               | 0.348                                                        | 21.765                         | 1503.93            | 32733.35           | 7.58                           | 1351.39            | 10243.36           |
| A_68_P23681257 | chr5:50449672-50449716                            | NM_133911:541     | Gpr125     | INSIDE                 | 0.505                                                        | 5.712                          | 6712.57            | 38339.98           | 2.883                          | 4960.44            | 14298.62           |
| A_68_P23681258 | chr5:50449746-50449790                            | NM_133911:467     | Gpr125     | INSIDE                 | 0.572                                                        | 5.187                          | 4401.94            | 22832.67           | 2.969                          | 3267.83            | 9702.39            |
| A_68_P28530000 | chr12:73171697-73171741                           | NM_181752:260     | Gpr135     | INSIDE                 | 0.401                                                        | 0.361                          | 2637.92            | 953.39             | 0.145                          | 1783.79            | 258.27             |
| A_68_P28833516 | chr13:13485759-13485803                           | NM_031999:111     | Gpr137b    | INSIDE                 | 0.365                                                        | 0.466                          | 2075.81            | 967.98             | 0.17                           | 1803.12            | 306.95             |
| A_68_P29569514 | chr14:45839639-45839683                           | NM_027518:269     | Gpr137c    | INSIDE                 | 0.184                                                        | 17.341                         | 1178.45            | 20435.32           | 3.192                          | 1129.27            | 3604.69            |
| A_68_P23417714 | chr4:151657357-151657401                          | NM_178406:8908    | Gpr153     | INSIDE                 | 0.496                                                        | 8.413                          | 952.51             | 8013.73            | 4.17                           | 782.50             | 3263.26            |
| A_68_P23417713 | chr4:151657232-151657276                          | NM_178406:8784    | Gpr153     | INSIDE                 | 0.57                                                         | 2.979                          | 1127.10            | 3357.65            | 1.698                          | 933.35             | 1584.38            |
| A_68_P21331224 | chr2:73224675-73224719                            | NM_001190297:-241 | Gpr155     | PROMOTER               | 0.285                                                        | 1.874                          | 7415.80            | 13896.36           | 0.534                          | 5216.30            | 2784.54            |
| A_68_P21331223 | chr2:73224563-73224607                            | NM_001190297:-129 | Gpr155     | PROMOTER               | 0.523                                                        | 0.247                          | 1855.13            | 458.40             | 0.129                          | 1329.39            | 171.70             |
| A_68_P23404232 | chr4:149461503-149461547                          | NM_177366:-87     | Gpr157     | PROMOTER               | 0.449                                                        | 0.405                          | 10540.94           | 4271.23            | 0.182                          | 7641.42            | 1390.47            |
| A_68_P23404231 | chr4:149461398-149461442                          | NM_177366:-191    | Gpr157     | PROMOTER               | 0.606                                                        | 0.370                          | 13075.60           | 4833.85            | 0.224                          | 8936.39            | 2002.49            |
| A_68_P23404235 | chr4:149461799-149461843                          | NM_177366:209     | Gpr157     | INSIDE                 | 0.546                                                        | 0.705                          | 3750.36            | 2642.87            | 0.384                          | 3163.27            | 1216.07            |
| A_68_P23404325 | chr4:149475753-149475801                          | NM_177366:14165   | Gpr157     | INSIDE                 | 0.543                                                        | 3.998                          | 617.34             | 2467.94            | 2.172                          | 450.47             | 978.55             |
| A_68_P24817421 | chr6:124811227-124811271                          | NM_013533:2687    | Gpr162     | INSIDE                 | 0.6                                                          | 5.518                          | 1212.96            | 6693.58            | 3.312                          | 920.01             | 3047.40            |



| ProbeName      | Target position of probe on CpG island microarray | TargetID           | GeneSymbol | CpG island Description | Ratio of relative methylation (TiO <sub>2</sub> -NP/Vehicle) | Sham group                     |                    |                    |                                | TiO <sub>2</sub> -H group |                    |  |
|----------------|---------------------------------------------------|--------------------|------------|------------------------|--------------------------------------------------------------|--------------------------------|--------------------|--------------------|--------------------------------|---------------------------|--------------------|--|
|                |                                                   |                    |            |                        |                                                              | Relative methylation (Cy5/Cy3) | Cy3 signal (Input) | Cy5 signal (MeDIP) | Relative methylation (Cy5/Cy3) | Cy3 signal (Input)        | Cy5 signal (MeDIP) |  |
| A_68_P30349002 | chr15:76369497-76369541                           | NM_029643:146      | Gpr172b    | INSIDE                 | 0.361                                                        | 0.557                          | 1571.86            | 875.06             | 0.201                          | 1146.53                   | 230.36             |  |
| A_68_P30349001 | chr15:76369402-76369446                           | NM_029643:52       | Gpr172b    | INSIDE                 | 0.232                                                        | 2.587                          | 6777.90            | 17533.63           | 0.601                          | 4155.94                   | 2498.94            |  |
| A_68_P29936846 | chr14:118536719-118536763                         | NM_021434:392      | Gpr180     | INSIDE                 | 0.658                                                        | 0.310                          | 5106.93            | 1584.75            | 0.204                          | 3041.77                   | 620.89             |  |
| A_68_P29936842 | chr14:118536259-118536304                         | NM_021434:-67      | Gpr180     | DIVERGENT_PROMOTER     | 0.638                                                        | 0.689                          | 2485.09            | 1713.16            | 0.44                           | 2027.47                   | 891.64             |  |
| A_68_P20644872 | chr1:138156299-138156343                          | NM_001101516:1130  | Gpr25      | INSIDE                 | 0.38                                                         | 0.469                          | 1320.82            | 618.87             | 0.178                          | 979.16                    | 174.42             |  |
| A_68_P23316365 | chr4:132768551-132768595                          | NM_008154:-121     | Gpr3       | DIVERGENT_PROMOTER     | 0.278                                                        | 13.679                         | 3123.72            | 42727.95           | 3.804                          | 2779.06                   | 10570.30           |  |
| A_68_P31953772 | chr19:11015670-11015714                           | NM_009962:4043     | Gpr44      | INSIDE                 | 0.582                                                        | 0.732                          | 2229.65            | 1632.57            | 0.426                          | 1798.69                   | 766.89             |  |
| A_68_P20186163 | chr1:43010333-43010377                            | NM_053107:638      | Gpr45      | INSIDE                 | 0.218                                                        | 0.218                          | 9723.69            | 2115.25            | 0.048                          | 5955.94                   | 283.05             |  |
| A_68_P32454734 | chrX:68917679-68917723                            | NM_010340:759      | Gpr50      | INSIDE                 | 0.155                                                        | 20.170                         | 1269.34            | 25602.54           | 3.134                          | 1531.22                   | 4799.51            |  |
| A_68_P27087305 | chr10:40792189-40792233                           | NM_199058:-820     | Gpr6       | PROMOTER               | 0.557                                                        | 6.011                          | 1710.35            | 10281.43           | 3.35                           | 1391.10                   | 4660.35            |  |
| A_68_P26803570 | chr9:106367374-106367418                          | NM_001159652:875   | Gpr62      | INSIDE                 | 0.497                                                        | 10.172                         | 903.30             | 9188.31            | 5.053                          | 722.25                    | 3649.19            |  |
| A_68_P28684687 | chr12:102146364-102146408                         | NM_001177674:-8652 | Gpr68      | PROMOTER               | 0.486                                                        | 7.314                          | 1923.33            | 14066.79           | 3.555                          | 1773.10                   | 6302.57            |  |
| A_68_P24249109 | chr6:13788674-13788718                            | NM_145066:1152     | Gpr85      | INSIDE                 | 0.632                                                        | 3.770                          | 946.95             | 3569.63            | 2.384                          | 763.62                    | 1820.23            |  |
| A_68_P22448215 | chr3:115955466-115955511                          | NM_022427:914      | Gpr88      | INSIDE                 | 0.395                                                        | 6.076                          | 5680.41            | 34514.62           | 2.401                          | 4720.45                   | 11332.92           |  |
| A_68_P22351745 | chr3:96708815-96708859                            | NM_026229:385      | Gpr89      | INSIDE                 | 0.346                                                        | 1.502                          | 2209.37            | 3319.36            | 0.52                           | 1866.08                   | 970.31             |  |
| A_68_P32678434 | chrX:132373604-132373648                          | NM_001163015:54    | Gprasp2    | INSIDE                 | 0.543                                                        | 3.276                          | 755.78             | 2475.96            | 1.779                          | 913.54                    | 1624.99            |  |
| A_68_P24864944 | chr6:135015833-135015878                          | NM_181444:176      | Gprc5a     | INSIDE                 | 0.438                                                        | 18.625                         | 1860.40            | 34649.78           | 8.156                          | 1460.73                   | 11913.48           |  |
| A_68_P24864942 | chr6:135015624-135015668                          | NM_181444:-33      | Gprc5a     | PROMOTER               | 0.431                                                        | 3.372                          | 1395.04            | 4704.66            | 1.455                          | 1159.85                   | 1687.73            |  |
| A_68_P28150134 | chr11:114713892-114713936                         | NM_147217:571      | Gprc5c     | INSIDE                 | 0.282                                                        | 6.611                          | 1233.63            | 8155.35            | 1.867                          | 1163.31                   | 2172.43            |  |
| A_68_P24486168 | chr6:59376435-59376479                            | NM_183183:-172     | Gprin3     | PROMOTER               | 0.274                                                        | 5.714                          | 1878.34            | 10732.82           | 1.564                          | 1603.98                   | 2507.91            |  |
| A_68_P21077785 | chr2:26171010-26171055                            | NM_001199146:-20   | Gpsm1      | PROMOTER               | 0.259                                                        | 31.857                         | 2382.51            | 75900.46           | 8.266                          | 2467.51                   | 20395.37           |  |
| A_68_P30350021 | chr15:76528223-76528267                           | NM_182805:1051     | Gpt        | INSIDE                 | 0.507                                                        | 0.400                          | 2561.27            | 1023.42            | 0.203                          | 1951.07                   | 395.28             |  |
| A_68_P26025056 | chr8:88017117-88017161                            | NM_173866:623      | Gpt2       | INSIDE                 | 0.464                                                        | 0.187                          | 2690.46            | 502.06             | 0.087                          | 1974.24                   | 170.79             |  |
| A_68_P27280645 | chr10:79516852-79516896                           | NM_001037741:93    | Gpx4       | INSIDE                 | 0.487                                                        | 10.295                         | 546.45             | 5625.78            | 5.016                          | 453.88                    | 2276.89            |  |
| A_68_P25035344 | chr7:31935750-31935794                            | NM_027898:297      | Gramd1a    | INSIDE                 | 0.314                                                        | 0.290                          | 2562.13            | 743.04             | 0.091                          | 1941.66                   | 176.96             |  |
| A_68_P25035342 | chr7:31935428-31935472                            | NM_027898:619      | Gramd1a    | INSIDE                 | 0.64                                                         | 0.534                          | 4880.07            | 2604.44            | 0.341                          | 3218.51                   | 1098.69            |  |
| A_68_P26443399 | chr9:40263199-40263243                            | NM_172768:129      | Gramd1b    | INSIDE                 | 0.53                                                         | 5.189                          | 563.12             | 2922.00            | 2.751                          | 603.66                    | 1660.72            |  |
| A_68_P26443402 | chr9:40263578-40263622                            | NM_172768:-251     | Gramd1b    | PROMOTER               | 0.461                                                        | 3.718                          | 1141.14            | 4242.40            | 1.716                          | 890.73                    | 1528.20            |  |
| A_68_P31730289 | chr18:56591860-56591904                           | NM_026240:97       | Gramd3     | INSIDE                 | 0.633                                                        | 2.439                          | 1509.60            | 3682.31            | 1.544                          | 1323.43                   | 2043.89            |  |
| A_68_P30404769 | chr15:85889475-85889519                           | NM_001205353:340   | Gramd4     | INSIDE                 | 0.438                                                        | 4.310                          | 2378.69            | 10253.35           | 1.888                          | 1960.07                   | 3699.81            |  |
| A_68_P30490489 | chr15:101062456-101062514                         | NM_019518:7847     | Grasp      | INSIDE                 | 0.256                                                        | 43.024                         | 774.23             | 33310.39           | 11.015                         | 1157.16                   | 12745.62           |  |
| A_68_P30490486 | chr15:101062223-101062267                         | NM_019518:7607     | Grasp      | INSIDE                 | 0.598                                                        | 6.171                          | 1681.68            | 10377.19           | 3.693                          | 1394.24                   | 5148.89            |  |
| A_68_P30490485 | chr15:101062094-101062138                         | NM_019518:7479     | Grasp      | INSIDE                 | 0.611                                                        | 3.356                          | 1778.96            | 5970.07            | 2.052                          | 1177.17                   | 2415.50            |  |
| A_68_P27594327 | chr11:11937393-11937437                           | NM_001177629:-9440 | Grb10      | PROMOTER               | 0.139                                                        | 50.173                         | 10824.78           | 543112.40          | 6.956                          | 11582.27                  | 80567.90           |  |
| A_68_P21283787 | chr2:64861006-64861050                            | NM_016719:-205     | Grb14      | PROMOTER               | 0.588                                                        | 0.395                          | 1902.11            | 750.52             | 0.232                          | 1589.10                   | 368.76             |  |
| A_68_P28056595 | chr11:98319477-98319521                           | NM_010346:11351    | Grb7       | DOWNSTREAM             | 0.408                                                        | 0.322                          | 2922.90            | 941.86             | 0.131                          | 2188.86                   | 287.66             |  |
| A_68_P28056588 | chr11:98318831-98318875                           | NM_010346:10705    | Grb7       | DOWNSTREAM             | 0.413                                                        | 0.550                          | 966.58             | 531.66             | 0.227                          | 766.59                    | 174.05             |  |
| A_68_P28266913 | chr12:16807387-16807431                           | NM_015764:284      | Greb1      | INSIDE                 | 0.542                                                        | 0.732                          | 8523.03            | 6242.06            | 0.397                          | 5842.99                   | 2319.88            |  |
| A_68_P31489152 | chr18:10325147-10325191                           | NM_001083628:-8    | Greb11     | PROMOTER               | 0.62                                                         | 7.009                          | 1588.16            | 11130.92           | 4.347                          | 1481.65                   | 6440.09            |  |
| A_68_P31489154 | chr18:10325470-10325514                           | NM_001083628:316   | Greb11     | INSIDE                 | 0.223                                                        | 1.527                          | 2908.88            | 4441.05            | 0.341                          | 2098.56                   | 715.06             |  |
| A_68_P21536555 | chr2:113598914-113598958                          | NM_011824:-131     | Grem1      | PROMOTER               | 0.276                                                        | 20.773                         | 8418.03            | 174867.10          | 5.724                          | 8046.88                   | 46059.13           |  |
| A_68_P28290299 | chr12:25257426-25257470                           | NM_145890:-8135    | Grh11      | PROMOTER               | 0.306                                                        | 6.131                          | 1783.35            | 10934.05           | 1.874                          | 1344.66                   | 2519.73            |  |
| A_68_P30142979 | chr15:37162921-37162965                           | NM_026496:152      | Grh12      | INSIDE                 | 0.322                                                        | 4.458                          | 1807.73            | 8058.34            | 1.437                          | 1641.73                   | 2358.60            |  |
| A_68_P23329301 | chr4:135126386-135126430                          | NM_001013756:3127  | Grh13      | INSIDE                 | 0.407                                                        | 0.308                          | 1607.54            | 494.35             | 0.125                          | 1371.29                   | 171.72             |  |
| A_68_P29531956 | chr14:35633743-35633787                           | NM_008166:443      | Grid1      | INSIDE                 | 0.514                                                        | 0.495                          | 1473.76            | 728.99             | 0.254                          | 1168.82                   | 296.95             |  |
| A_68_P29531957 | chr14:35633864-35633908                           | NM_008166:565      | Grid1      | INSIDE                 | 0.638                                                        | 0.315                          | 3523.50            | 1108.34            | 0.201                          | 2246.02                   | 451.00             |  |

| ProbeName      | Target position of probe on CpG island microarray | TargetID           | GeneSymbol | CpG island Description | Ratio of relative methylation (TiO <sub>2</sub> -NP/Vehicle) | Sham group                     |                    |                    | TiO <sub>2</sub> -H group      |                    |                    |
|----------------|---------------------------------------------------|--------------------|------------|------------------------|--------------------------------------------------------------|--------------------------------|--------------------|--------------------|--------------------------------|--------------------|--------------------|
|                |                                                   |                    |            |                        |                                                              | Relative methylation (Cy5/Cy3) | Cy3 signal (Input) | Cy5 signal (MeDIP) | Relative methylation (Cy5/Cy3) | Cy3 signal (Input) | Cy5 signal (MeDIP) |
| A_68_P29531946 | chr14:35632404-35632448                           | NM_008166:-895     | Grid1      | PROMOTER               | 0.644                                                        | 2.821                          | 750.83             | 2118.01            | 1.817                          | 548.21             | 996.24             |
| A_68_P24501242 | chr6:63207663-63207707                            | NM_008167:834      | Grid2      | INSIDE                 | 0.131                                                        | 30.133                         | 1851.65            | 55794.82           | 3.943                          | 1759.87            | 6938.32            |
| A_68_P24501230 | chr6:63206331-63206375                            | NM_008167:-498     | Grid2      | PROMOTER               | 0.241                                                        | 0.606                          | 1508.49            | 914.89             | 0.146                          | 1180.95            | 172.97             |
| A_68_P24501227 | chr6:63205942-63205990                            | NM_008167:-884     | Grid2      | PROMOTER               | 0.285                                                        | 14.387                         | 203.67             | 2930.16            | 4.098                          | 163.85             | 671.38             |
| A_68_P24156175 | chr5:144119353-144119397                          | NM_133355:-6212    | Grid2ip    | PROMOTER               | 0.228                                                        | 13.069                         | 4620.79            | 60387.04           | 2.978                          | 5637.83            | 16789.43           |
| A_68_P24156215 | chr5:144126161-144126205                          | NM_133355:596      | Grid2ip    | INSIDE                 | 0.586                                                        | 0.210                          | 2959.50            | 622.80             | 0.123                          | 1981.07            | 244.10             |
| A_68_P24156243 | chr5:144131687-144131731                          | NM_133355:6122     | Grid2ip    | INSIDE                 | 0.612                                                        | 3.395                          | 5570.72            | 18910.80           | 2.078                          | 4294.89            | 8926.70            |
| A_68_P27127237 | chr10:49508470-49508514                           | NM_001111268:68    | Grik2      | INSIDE                 | 0.489                                                        | 5.204                          | 1094.33            | 5695.15            | 2.544                          | 960.14             | 2442.78            |
| A_68_P27127238 | chr10:49508642-49508686                           | NM_001111268:-104  | Grik2      | PROMOTER               | 0.641                                                        | 0.605                          | 1115.84            | 675.54             | 0.388                          | 881.53             | 342.05             |
| A_68_P23274589 | chr4:125167651-125167695                          | NM_001081097:-402  | Grik3      | PROMOTER               | 0.508                                                        | 0.408                          | 1298.11            | 530.22             | 0.208                          | 1124.28            | 233.45             |
| A_68_P23274592 | chr4:125168108-125168152                          | NM_001081097:56    | Grik3      | INSIDE                 | 0.589                                                        | 0.388                          | 1483.86            | 575.77             | 0.228                          | 1108.83            | 253.21             |
| A_68_P26458694 | chr9:42752015-42752059                            | NM_175481:418      | Grik4      | INSIDE                 | 0.218                                                        | 1.884                          | 17401.53           | 32792.59           | 0.41                           | 11246.89           | 4614.66            |
| A_68_P26458693 | chr9:42751946-42751990                            | NM_175481:486      | Grik4      | INSIDE                 | 0.485                                                        | 0.628                          | 9874.86            | 6196.69            | 0.304                          | 6634.49            | 2017.41            |
| A_68_P25008201 | chr7:25857783-25857827                            | NM_008168:-416     | Grik5      | DIVERGENT_PROMOTER     | 0.132                                                        | 11.424                         | 4908.53            | 56077.17           | 1.504                          | 3581.93            | 5386.44            |
| A_68_P25008202 | chr7:25857869-25857913                            | NM_008168:-502     | Grik5      | DIVERGENT_PROMOTER     | 0.636                                                        | 0.636                          | 1055.57            | 670.82             | 0.404                          | 834.79             | 337.27             |
| A_68_P21071262 | chr2:25160552-25160596                            | NM_001177656:14109 | Grin1      | INSIDE                 | 0.369                                                        | 0.462                          | 1051.63            | 486.21             | 0.171                          | 1021.12            | 174.21             |
| A_68_P21071361 | chr2:25174135-25174179                            | NM_001177656:527   | Grin1      | INSIDE                 | 0.476                                                        | 0.362                          | 1298.74            | 470.03             | 0.172                          | 1001.42            | 172.39             |
| A_68_P30540368 | chr16:9995820-9995865                             | NM_008170:-3216    | Grin2a     | PROMOTER               | 0.289                                                        | 48.957                         | 5587.85            | 273567.00          | 14.158                         | 4843.32            | 68571.05           |
| A_68_P24868564 | chr6:135683145-135683189                          | NM_008171:440363   | Grin2b     | INSIDE                 | 0.384                                                        | 4.222                          | 905.19             | 3821.63            | 1.623                          | 759.81             | 1233.34            |
| A_68_P28152428 | chr11:115128243-115128287                         | NM_010350:293      | Grin2c     | INSIDE                 | 0.615                                                        | 3.228                          | 1735.54            | 5603.06            | 1.985                          | 1395.58            | 2769.90            |
| A_68_P28152412 | chr11:115126609-115126660                         | NM_010350:1923     | Grin2c     | INSIDE                 | 0.376                                                        | 0.558                          | 1204.42            | 672.04             | 0.21                           | 826.67             | 173.34             |
| A_68_P25095390 | chr7:53088658-53088702                            | NM_008172:33371    | Grin2d     | INSIDE                 | 0.274                                                        | 11.489                         | 1196.48            | 13746.95           | 3.144                          | 1052.85            | 3310.47            |
| A_68_P30347073 | chr15:76077636-76077680                           | NM_023168:422      | Grina      | INSIDE                 | 0.529                                                        | 0.184                          | 4811.17            | 882.98             | 0.097                          | 3289.54            | 319.45             |
| A_68_P26622299 | chr9:71333296-71333340                            | NM_001164793:-553  | Grin1a     | PROMOTER               | 0.562                                                        | 3.662                          | 1188.42            | 4352.38            | 2.058                          | 1057.13            | 2175.26            |
| A_68_P26622301 | chr9:71333539-71333583                            | NM_001164793:-795  | Grin1a     | PROMOTER               | 0.584                                                        | 4.369                          | 1312.31            | 5733.46            | 2.551                          | 1152.64            | 2940.10            |
| A_68_P23595699 | chr5:35003466-35003510                            | NM_001080743:461   | Grk4       | INSIDE                 | 0.574                                                        | 0.497                          | 1231.55            | 611.63             | 0.285                          | 962.03             | 274.46             |
| A_68_P32227733 | chr19:60965534-60965578                           | NM_018869:-95      | Grk5       | PROMOTER               | 0.097                                                        | 2.449                          | 1100.36            | 2694.77            | 0.239                          | 983.32             | 234.71             |
| A_68_P32227741 | chr19:60966626-60966673                           | NM_018869:998      | Grk5       | INSIDE                 | 0.368                                                        | 0.207                          | 3096.97            | 642.47             | 0.076                          | 2245.14            | 171.58             |
| A_68_P26804350 | chr9:106549989-106550033                          | NM_001160353:8430  | Grm2       | INSIDE                 | 0.279                                                        | 8.076                          | 1674.87            | 13526.21           | 2.252                          | 1141.71            | 2571.62            |
| A_68_P26804349 | chr9:106549876-106549920                          | NM_001160353:8542  | Grm2       | INSIDE                 | 0.444                                                        | 6.096                          | 2193.42            | 13370.08           | 2.707                          | 1478.58            | 4002.47            |
| A_68_P26804348 | chr9:106549759-106549803                          | NM_001160353:8660  | Grm2       | INSIDE                 | 0.472                                                        | 3.771                          | 1295.65            | 4886.22            | 1.78                           | 984.82             | 1753.42            |
| A_68_P31116317 | chr17:27571773-27571817                           | NM_001013385:68455 | Grm4       | INSIDE                 | 0.524                                                        | 3.457                          | 1117.79            | 3863.66            | 1.811                          | 894.63             | 1620.10            |
| A_68_P31116576 | chr17:27610068-27610113                           | NM_001013385:30159 | Grm4       | INSIDE                 | 0.242                                                        | 5.812                          | 3722.98            | 21637.15           | 1.407                          | 2716.10            | 3820.61            |
| A_68_P24318684 | chr6:28083743-28083787                            | NM_008174:605      | Grm8       | INSIDE                 | 0.523                                                        | 0.708                          | 1487.28            | 1052.63            | 0.37                           | 1204.11            | 445.73             |
| A_68_P28703478 | chr12:105710469-105710513                         | NM_010351:956      | Gsc        | INSIDE                 | 0.535                                                        | 0.397                          | 2463.23            | 978.90             | 0.213                          | 1930.01            | 410.49             |
| A_68_P28703487 | chr12:105711415-105711459                         | NM_010351:10       | Gsc        | INSIDE                 | 0.47                                                         | 0.573                          | 1147.12            | 657.47             | 0.269                          | 935.38             | 252.07             |
| A_68_P30576539 | chr16:17915177-17915221                           | NM_029469:-46      | Gsc2       | PROMOTER               | 0.647                                                        | 0.469                          | 1225.31            | 574.14             | 0.303                          | 989.77             | 300.03             |
| A_68_P30576536 | chr16:17914943-17914987                           | NM_029469:188      | Gsc2       | INSIDE                 | 0.104                                                        | 4.270                          | 874.20             | 3732.83            | 0.442                          | 791.06             | 349.74             |
| A_68_P26220483 | chr8:123012034-123012078                          | NM_198671:-709     | Gse1       | PROMOTER               | 0.239                                                        | 14.603                         | 1216.14            | 17759.59           | 3.483                          | 1024.06            | 3567.12            |
| A_68_P26220485 | chr8:123012259-123012305                          | NM_198671:-483     | Gse1       | PROMOTER               | 0.355                                                        | 0.477                          | 1583.91            | 756.29             | 0.17                           | 1025.10            | 173.82             |
| A_68_P26220843 | chr8:123060419-123060463                          | NM_001145896:-868  | Gse1       | PROMOTER               | 0.489                                                        | 4.382                          | 2738.69            | 11999.78           | 2.144                          | 2157.47            | 4626.13            |
| A_68_P26220844 | chr8:123060496-123060540                          | NM_001145896:-790  | Gse1       | PROMOTER               | 0.544                                                        | 0.302                          | 2711.67            | 819.84             | 0.164                          | 1881.50            | 309.45             |
| A_68_P26220850 | chr8:123061186-123061230                          | NM_001145896:-100  | Gse1       | PROMOTER               | 0.578                                                        | 5.213                          | 981.48             | 5116.57            | 3.016                          | 777.72             | 2345.42            |
| A_68_P26220858 | chr8:123061951-123061995                          | NM_001145896:664   | Gse1       | INSIDE                 | 0.579                                                        | 6.979                          | 1181.93            | 8248.55            | 4.039                          | 1157.61            | 4675.15            |
| A_68_P26220864 | chr8:123062616-123062660                          | NM_001145896:1330  | Gse1       | INSIDE                 | 0.606                                                        | 5.862                          | 840.45             | 4926.71            | 3.553                          | 706.75             | 2511.27            |
| A_68_P26220480 | chr8:123011650-123011694                          | NM_198671:-1093    | Gse1       | PROMOTER               | 0.607                                                        | 4.867                          | 936.02             | 4556.05            | 2.953                          | 830.37             | 2452.12            |

| ProbeName      | Target position of probe on CpG island microarray | TargetID           | GeneSymbol    | CpG island Description | Ratio of relative methylation (TiO <sub>2</sub> -NP/Vehicle) | Sham group                     |                    |                    | TiO <sub>2</sub> -H group      |                    |                    |
|----------------|---------------------------------------------------|--------------------|---------------|------------------------|--------------------------------------------------------------|--------------------------------|--------------------|--------------------|--------------------------------|--------------------|--------------------|
|                |                                                   |                    |               |                        |                                                              | Relative methylation (Cy5/Cy3) | Cy3 signal (Input) | Cy5 signal (MeDIP) | Relative methylation (Cy5/Cy3) | Cy3 signal (Input) | Cy5 signal (MeDIP) |
| A_68_P25498532 | chr7:133225682-133225726                          | NM_001101488:221   | Gsgl1         | INSIDE                 | 0.415                                                        | 15.989                         | 11785.03           | 188433.00          | 6.63                           | 11223.69           | 74409.58           |
| A_68_P21132488 | chr2:35112210-35112254                            | NM_001206367:354   | Gsn           | INSIDE                 | 0.466                                                        | 0.341                          | 1457.10            | 496.82             | 0.159                          | 1080.47            | 171.85             |
| A_68_P21132680 | chr2:35138083-35138127                            | NM_146120:205      | Gsn           | INSIDE                 | 0.654                                                        | 3.020                          | 862.33             | 2604.64            | 1.977                          | 698.14             | 1379.91            |
| A_68_P30547081 | chr16:11253703-11253747                           | NM_001130008:694   | Gspt1         | INSIDE                 | 0.651                                                        | 0.216                          | 2698.43            | 581.74             | 0.14                           | 1876.57            | 263.32             |
| A_68_P25770033 | chr8:34764110-34764154                            | NM_010344:423      | Gsr           | INSIDE                 | 0.19                                                         | 25.257                         | 3735.47            | 94346.14           | 4.809                          | 3566.68            | 17152.30           |
| A_68_P25770032 | chr8:34763961-34764005                            | NM_010344:273      | Gsr           | INSIDE                 | 0.298                                                        | 10.628                         | 2685.30            | 28539.80           | 3.166                          | 2448.10            | 7751.02            |
| A_68_P21766453 | chr2:155418540-155418584                          | NM_008180:-120     | Gss           | PROMOTER               | 0.337                                                        | 7.990                          | 617.29             | 4931.97            | 2.692                          | 493.71             | 1329.24            |
| A_68_P22540995 | chr3:132754697-132754741                          | NM_026231:-14      | Gsted         | DIVERGENT_PROMOTER     | 0.649                                                        | 4.037                          | 595.63             | 2404.51            | 2.618                          | 473.32             | 1239.38            |
| A_68_P32152318 | chr19:47929317-47929361                           | NM_010362:-140     | Gsto1         | PROMOTER               | 0.639                                                        | 0.463                          | 1455.41            | 673.73             | 0.296                          | 928.36             | 274.80             |
| A_68_P28614428 | chr12:88487974-88488018                           | NM_010363:-671     | Gstz1         | PROMOTER               | 0.587                                                        | 0.314                          | 1978.57            | 620.32             | 0.184                          | 1418.73            | 261.21             |
| A_68_P23807227 | chr5:75471945-75471989                            | NM_133256:341      | Gsx2          | INSIDE                 | 0.459                                                        | 0.319                          | 1455.62            | 464.33             | 0.146                          | 1200.85            | 175.92             |
| A_68_P23807226 | chr5:75471874-75471918                            | NM_133256:271      | Gsx2          | INSIDE                 | 0.496                                                        | 0.325                          | 2388.43            | 776.69             | 0.161                          | 1816.43            | 292.80             |
| A_68_P24757354 | chr6:113026958-113027002                          | NR_027010:258      | Gt(ROSA)26Sor | INSIDE                 | 0.484                                                        | 4.496                          | 1802.80            | 8105.08            | 2.176                          | 1451.70            | 3159.46            |
| A_68_P24757355 | chr6:113027040-113027084                          | NR_027010:176      | Gt(ROSA)26Sor | INSIDE                 | 0.536                                                        | 0.480                          | 2044.80            | 981.45             | 0.257                          | 1453.86            | 374.00             |
| A_68_P24757356 | chr6:113027164-113027208                          | NR_027010:52       | Gt(ROSA)26Sor | INSIDE                 | 0.598                                                        | 0.731                          | 1810.41            | 1323.73            | 0.437                          | 1529.90            | 669.26             |
| A_68_P30681056 | chr16:37539468-37539512                           | NM_028812:365      | Gtf2e1        | INSIDE                 | 0.418                                                        | 4.552                          | 2060.25            | 9377.99            | 1.903                          | 1606.61            | 3057.15            |
| A_68_P31259561 | chr17:57151014-57151058                           | NM_133801:-325     | Gtf2f1        | PROMOTER               | 0.439                                                        | 0.611                          | 944.17             | 576.76             | 0.268                          | 847.31             | 227.10             |
| A_68_P29731240 | chr14:76410493-76410537                           | NM_026816:158      | Gtf2f2        | INSIDE                 | 0.388                                                        | 1.525                          | 1912.28            | 2915.77            | 0.592                          | 1440.03            | 851.87             |
| A_68_P29268695 | chr13:101262403-101262447                         | NM_022011:140      | Gtf2h2        | INSIDE                 | 0.64                                                         | 0.575                          | 3647.85            | 2097.80            | 0.368                          | 2948.48            | 1086.01            |
| A_68_P29268696 | chr13:101262505-101262549                         | NM_022011:38       | Gtf2h2        | INSIDE                 | 0.632                                                        | 0.648                          | 1354.04            | 876.97             | 0.409                          | 1037.52            | 424.46             |
| A_68_P24112572 | chr5:134790667-134790711                          | NM_001080746:-72   | Gtf2i         | PROMOTER               | 0.129                                                        | 12.729                         | 1467.43            | 18678.71           | 1.641                          | 1243.95            | 2041.38            |
| A_68_P24111875 | chr5:134660308-134660352                          | NM_053266:423      | Gtf2ird2      | INSIDE                 | 0.34                                                         | 0.562                          | 2938.40            | 1651.33            | 0.191                          | 2311.99            | 441.48             |
| A_68_P25496222 | chr7:132850904-132850948                          | NM_207239:276      | Gtf3c1        | INSIDE                 | 0.391                                                        | 3.869                          | 4293.94            | 16613.61           | 1.512                          | 3357.21            | 5075.98            |
| A_68_P21093574 | chr2:28695671-28695715                            | NM_001166033:188   | Gtf3c4        | INSIDE                 | 0.538                                                        | 12.856                         | 1087.65            | 13982.45           | 6.915                          | 941.61             | 6510.80            |
| A_68_P21092000 | chr2:28438292-28438336                            | NM_148928:485      | Gtf3c5        | INSIDE                 | 0.46                                                         | 0.332                          | 2587.58            | 859.12             | 0.153                          | 1882.72            | 287.44             |
| A_68_P21092002 | chr2:28438501-28438545                            | NM_148928:277      | Gtf3c5        | INSIDE                 | 0.528                                                        | 5.551                          | 1292.81            | 7176.76            | 2.932                          | 1096.95            | 3215.73            |
| A_68_P27083091 | chr10:39977457-39977501                           | NM_026113:-7       | Gtf3c6        | PROMOTER               | 0.454                                                        | 6.615                          | 3183.08            | 21055.75           | 3.003                          | 2515.06            | 7552.74            |
| A_68_P30367927 | chr15:79521233-79521289                           | NM_013818:-65      | Gtpbp1        | DIVERGENT_PROMOTER     | 0.28                                                         | 11.681                         | 2288.35            | 26730.24           | 3.272                          | 2033.95            | 6655.64            |
| A_68_P30367929 | chr15:79521459-79521503                           | NM_013818:155      | Gtpbp1        | INSIDE                 | 0.581                                                        | 3.547                          | 1222.28            | 4335.99            | 2.061                          | 1307.26            | 2693.62            |
| A_68_P30367930 | chr15:79521605-79521649                           | NM_013818:301      | Gtpbp1        | INSIDE                 | 0.623                                                        | 0.345                          | 2604.32            | 898.00             | 0.215                          | 2091.72            | 449.21             |
| A_68_P25957096 | chr8:74013396-74013440                            | NM_032544:1417     | Gtpbp3        | INSIDE                 | 0.13                                                         | 2.218                          | 4534.58            | 10055.97           | 0.288                          | 2727.25            | 784.23             |
| A_68_P28813934 | chr13:8995156-8995200                             | NM_027000:80       | Gtpbp4        | INSIDE                 | 0.666                                                        | 0.304                          | 1830.01            | 555.65             | 0.202                          | 1409.53            | 285.13             |
| A_68_P23977825 | chr5:110537297-110537341                          | NM_145147:-102     | Gtpbp6        | DIVERGENT_PROMOTER     | 0.402                                                        | 0.228                          | 2728.39            | 620.74             | 0.091                          | 2078.78            | 190.21             |
| A_68_P26274325 | chr9:3532341-3532385                              | NM_001033322:9     | Gucyl2a2      | INSIDE                 | 0.579                                                        | 0.384                          | 3908.35            | 1501.05            | 0.222                          | 2804.85            | 623.69             |
| A_68_P27835392 | chr11:59005058-59005102                           | NM_001159410:-3837 | Guk1          | PROMOTER               | 0.476                                                        | 0.507                          | 1601.92            | 812.80             | 0.242                          | 1375.53            | 332.32             |
| A_68_P20193921 | chr1:44608865-44608909                            | NM_028450:371      | Gulp1         | INSIDE                 | 0.49                                                         | 0.221                          | 2300.21            | 508.64             | 0.108                          | 1656.59            | 179.52             |
| A_68_P30446024 | chr15:93105588-93105632                           | NM_001033275:-95   | Gxylt1        | PROMOTER               | 0.326                                                        | 1.911                          | 4323.84            | 8263.36            | 0.623                          | 3746.84            | 2334.33            |
| A_68_P21978659 | chr3:20054868-20054912                            | NM_013755:105      | Gyg           | INSIDE                 | 0.445                                                        | 7.488                          | 1259.03            | 9427.42            | 3.332                          | 1028.86            | 3428.21            |
| A_68_P32507212 | chrX:83022021-83022065                            | NM_008194:116      | Gyk           | INSIDE                 | 0.146                                                        | 26.601                         | 17194.68           | 457396.20          | 3.871                          | 21902.74           | 84778.35           |
| A_68_P32507214 | chrX:83022249-83022293                            | NM_008194:-114     | Gyk           | PROMOTER               | 0.344                                                        | 4.295                          | 4360.39            | 18727.04           | 1.476                          | 5156.15            | 7612.52            |
| A_68_P21428052 | chr2:92211160-92211204                            | NM_001166633:11    | Gylt1b        | INSIDE                 | 0.403                                                        | 4.639                          | 1282.40            | 5949.35            | 1.87                           | 1124.23            | 2102.80            |
| A_68_P31603477 | chr18:32719222-32719266                           | NM_001048207:444   | Gypc          | INSIDE                 | 0.28                                                         | 0.429                          | 2063.54            | 884.32             | 0.12                           | 1429.60            | 171.79             |
| A_68_P24904453 | chr6:142363298-142363342                          | NM_145572:58309    | Gys2          | DOWNSTREAM             | 0.456                                                        | 0.715                          | 1454.52            | 1040.15            | 0.326                          | 1207.20            | 393.40             |
| A_68_P21750488 | chr2:152495422-152495466                          | NM_001159553:248   | H13           | INSIDE                 | 0.251                                                        | 1.719                          | 898.66             | 1544.80            | 0.431                          | 763.18             | 329.28             |
| A_68_P24619080 | chr6:87930668-87930712                            | NM_198622:786      | H1fx          | INSIDE                 | 0.652                                                        | 0.340                          | 2472.15            | 840.80             | 0.222                          | 1936.27            | 429.60             |
| A_68_P27568543 | chr11:6344478-6344522                             | NM_029938:-54      | H2afv         | PROMOTER               | 0.377                                                        | 0.340                          | 1983.44            | 674.83             | 0.128                          | 1408.62            | 180.62             |

| ProbeName      | Target position of probe on CpG island microarray | TargetID         | GeneSymbol | CpG island Description | Ratio of relative methylation (TiO <sub>2</sub> -NP/Vehicle) | Sham group                     |                    |                    | TiO <sub>2</sub> -H group      |                    |                    |
|----------------|---------------------------------------------------|------------------|------------|------------------------|--------------------------------------------------------------|--------------------------------|--------------------|--------------------|--------------------------------|--------------------|--------------------|
|                |                                                   |                  |            |                        |                                                              | Relative methylation (Cy5/Cy3) | Cy3 signal (Input) | Cy5 signal (MeDIP) | Relative methylation (Cy5/Cy3) | Cy3 signal (Input) | Cy5 signal (MeDIP) |
| A_68_P27568544 | chr11:6344567-6344611                             | NM_029938:-142   | H2afv      | PROMOTER               | 0.636                                                        | 0.465                          | 1341.96            | 624.37             | 0.296                          | 1012.70            | 299.51             |
| A_68_P26467074 | chr9:44143508-44143552                            | NM_010436:733    | H2afx      | INSIDE                 | 0.408                                                        | 0.444                          | 1186.35            | 527.18             | 0.181                          | 972.09             | 176.06             |
| A_68_P26467075 | chr9:44143629-44143673                            | NM_010436:853    | H2afx      | INSIDE                 | 0.614                                                        | 4.096                          | 1431.25            | 5862.71            | 2.517                          | 1093.42            | 2751.62            |
| A_68_P27182284 | chr10:61246043-61246087                           | NM_207000:548    | H2afy2     | INSIDE                 | 0.314                                                        | 9.348                          | 4056.25            | 37916.29           | 2.936                          | 3492.48            | 10253.82           |
| A_68_P27182287 | chr10:61246439-61246483                           | NM_207000:152    | H2afy2     | INSIDE                 | 0.378                                                        | 6.467                          | 1958.38            | 12665.06           | 2.443                          | 1658.48            | 4051.32            |
| A_68_P27182283 | chr10:61245921-61245965                           | NM_207000:670    | H2afy2     | INSIDE                 | 0.609                                                        | 0.413                          | 1967.07            | 811.85             | 0.251                          | 1647.49            | 413.87             |
| A_68_P22565464 | chr3:137527246-137527290                          | NM_016750:-294   | H2afz      | PROMOTER               | 0.483                                                        | 0.498                          | 2535.72            | 1262.74            | 0.24                           | 2245.52            | 539.68             |
| A_68_P22565463 | chr3:137527117-137527161                          | NM_016750:-424   | H2afz      | PROMOTER               | 0.656                                                        | 0.248                          | 3125.98            | 774.95             | 0.163                          | 2669.40            | 434.07             |
| A_68_P31162404 | chr17:36221085-36221129                           | NM_008199:88     | H2-B1      | INSIDE                 | 0.514                                                        | 4.394                          | 3179.98            | 13972.88           | 2.257                          | 2373.15            | 5356.52            |
| A_68_P31159077 | chr17:35516814-35516858                           | NM_001143689:275 | H2-Gs10    | INSIDE                 | 0.539                                                        | 3.417                          | 3679.33            | 12573.35           | 1.842                          | 3005.95            | 5536.06            |
| A_68_P31158869 | chr17:35457566-35457610                           | NM_010390:86     | H2-Q1      | INSIDE                 | 0.475                                                        | 5.762                          | 2539.44            | 14632.92           | 2.735                          | 2319.46            | 6343.19            |
| A_68_P31158874 | chr17:35458237-35458281                           | NM_010390:756    | H2-Q1      | INSIDE                 | 0.499                                                        | 0.539                          | 1144.81            | 617.09             | 0.269                          | 836.48             | 225.08             |
| A_68_P31159262 | chr17:35607004-35607048                           | NM_010391:-7     | H2-Q10     | PROMOTER               | 0.2                                                          | 8.084                          | 1210.58            | 9786.28            | 1.616                          | 993.48             | 1604.98            |
| A_68_P20877951 | chr1:182742690-182742734                          | NM_008210:1022   | H3f3a      | INSIDE                 | 0.151                                                        | 18.742                         | 2513.01            | 47097.58           | 2.833                          | 2015.95            | 5712.06            |
| A_68_P20877853 | chr1:182724319-182724363                          | NM_008210:19394  | H3f3a      | DOWNSTREAM             | 0.486                                                        | 0.447                          | 1126.64            | 504.08             | 0.217                          | 771.05             | 167.60             |
| A_68_P28156895 | chr11:115885168-115885212                         | NM_008211:628    | H3f3b      | INSIDE                 | 0.611                                                        | 3.015                          | 971.02             | 2927.41            | 1.841                          | 937.34             | 1725.58            |
| A_68_P29097470 | chr13:64263694-64263738                           | NM_019986:543    | Habp4      | INSIDE                 | 0.626                                                        | 0.527                          | 2107.43            | 1111.32            | 0.33                           | 1687.00            | 556.80             |
| A_68_P27111732 | chr10:45297581-45297625                           | NM_172473:-32    | Hace1      | PROMOTER               | 0.566                                                        | 3.283                          | 1107.82            | 3636.49            | 1.858                          | 970.39             | 1802.56            |
| A_68_P27111735 | chr10:45297945-45297989                           | NM_172473:332    | Hace1      | INSIDE                 | 0.313                                                        | 1.809                          | 1829.34            | 3308.69            | 0.566                          | 1825.88            | 1034.30            |
| A_68_P22531299 | chr3:130975017-130975061                          | NM_008212:-83    | Hadh       | PROMOTER               | 0.301                                                        | 41.650                         | 8778.36            | 365618.90          | 12.523                         | 9092.29            | 113865.60          |
| A_68_P22531298 | chr3:130974889-130974933                          | NM_008212:45     | Hadh       | INSIDE                 | 0.633                                                        | 0.235                          | 3552.14            | 833.06             | 0.149                          | 2431.21            | 361.16             |
| A_68_P22531296 | chr3:130974638-130974682                          | NM_008212:295    | Hadh       | INSIDE                 | 0.337                                                        | 5.011                          | 1863.39            | 9338.08            | 1.69                           | 1553.33            | 2625.87            |
| A_68_P31099857 | chr17:24987665-24987709                           | NM_001159626:75  | Hagh       | INSIDE                 | 0.493                                                        | 0.290                          | 1556.30            | 450.76             | 0.143                          | 1190.42            | 170.07             |
| A_68_P27827732 | chr11:57641072-57641118                           | NM_008213:4555   | Hand1      | DOWNSTREAM             | 0.33                                                         | 0.189                          | 4384.34            | 829.12             | 0.062                          | 2794.41            | 174.37             |
| A_68_P27827767 | chr11:57645283-57645327                           | NM_008213:345    | Hand1      | INSIDE                 | 0.45                                                         | 0.309                          | 3744.02            | 1157.56            | 0.139                          | 2660.39            | 370.35             |
| A_68_P27827764 | chr11:57644954-57644998                           | NM_008213:673    | Hand1      | INSIDE                 | 0.418                                                        | 0.579                          | 796.38             | 461.18             | 0.242                          | 721.17             | 174.76             |
| A_68_P25890515 | chr8:59799750-59799801                            | NM_010402:-4     | Hand2      | PROMOTER               | 0.491                                                        | 0.509                          | 1349.59            | 686.47             | 0.25                           | 1073.24            | 268.30             |
| A_68_P25890518 | chr8:59800166-59800210                            | NM_010402:409    | Hand2      | INSIDE                 | 0.504                                                        | 0.701                          | 1244.56            | 872.55             | 0.353                          | 1052.77            | 371.70             |
| A_68_P25949728 | chr8:72607980-72608024                            | NM_177900:575    | Hapln4     | INSIDE                 | 0.616                                                        | 0.341                          | 2269.69            | 772.97             | 0.21                           | 1812.79            | 380.31             |
| A_68_P31075179 | chr17:17987266-17987310                           | NM_008215:4864   | Has1       | INSIDE                 | 0.581                                                        | 2.922                          | 1525.40            | 4457.41            | 1.697                          | 1352.07            | 2294.49            |
| A_68_P31075177 | chr17:17987055-17987099                           | NM_008215:5076   | Has1       | INSIDE                 | 0.664                                                        | 2.098                          | 2850.27            | 5978.69            | 1.394                          | 2369.22            | 3301.97            |
| A_68_P26141795 | chr8:109394997-109395041                          | NM_008217:877    | Has3       | INSIDE                 | 0.585                                                        | 3.327                          | 877.17             | 2918.42            | 1.946                          | 642.65             | 1250.37            |
| A_68_P21319207 | chr2:71227345-71227389                            | NM_026115:50     | Hat1       | INSIDE                 | 0.507                                                        | 0.360                          | 1242.72            | 447.20             | 0.182                          | 965.14             | 175.99             |
| A_68_P31849646 | chr18:78006372-78006416                           | NM_146089:125    | Haus1      | INSIDE                 | 0.612                                                        | 0.455                          | 2189.81            | 997.24             | 0.279                          | 1727.22            | 481.65             |
| A_68_P21576348 | chr2:120454904-120454948                          | NM_025475:19755  | Haus2      | DOWNSTREAM             | 0.443                                                        | 0.590                          | 3497.08            | 1922.07            | 0.244                          | 2629.21            | 640.83             |
| A_68_P25955959 | chr8:73796363-73796407                            | NM_001163042:105 | Haus8      | INSIDE                 | 0.38                                                         | 1.673                          | 2303.92            | 3853.60            | 0.636                          | 1752.89            | 1115.41            |
| A_68_P31624332 | chr18:36675376-36675420                           | NM_010415:61     | Hbegf      | INSIDE                 | 0.443                                                        | 5.245                          | 1800.79            | 9444.64            | 2.325                          | 1499.99            | 3487.56            |
| A_68_P28334080 | chr12:32634604-32634648                           | NM_153198:774    | Hbp1       | INSIDE                 | 0.324                                                        | 13.325                         | 568.38             | 7573.39            | 4.321                          | 470.49             | 2032.94            |
| A_68_P28334082 | chr12:32634899-32634943                           | NM_153198:480    | Hbp1       | INSIDE                 | 0.617                                                        | 3.210                          | 1745.62            | 5603.41            | 1.981                          | 1435.26            | 2842.98            |
| A_68_P28334079 | chr12:32634445-32634489                           | NM_153198:934    | Hbp1       | INSIDE                 | 0.433                                                        | 0.556                          | 964.02             | 536.42             | 0.241                          | 794.91             | 191.61             |
| A_68_P32820569 | chrX:165758461-165758505                          | NM_008222:-207   | Hccs       | PROMOTER               | 0.564                                                        | 4.283                          | 519.63             | 2225.42            | 2.416                          | 745.30             | 1800.48            |
| A_68_P21753005 | chr2:152934198-152934242                          | NM_001172117:17  | Hck        | INSIDE                 | 0.469                                                        | 0.681                          | 1181.61            | 804.69             | 0.32                           | 1003.63            | 320.66             |
| A_68_P27278461 | chr10:79180701-79180746                           | NM_008226:1345   | Hcn2       | INSIDE                 | 0.484                                                        | 4.164                          | 2340.20            | 9743.98            | 2.016                          | 1781.80            | 3591.85            |
| A_68_P27278520 | chr10:79187527-79187571                           | NM_008226:8170   | Hen2       | INSIDE                 | 0.623                                                        | 22.870                         | 1189.04            | 27193.51           | 14.243                         | 1050.53            | 14963.06           |
| A_68_P27278521 | chr10:79187599-79187649                           | NM_008226:8246   | Hen2       | INSIDE                 | 0.273                                                        | 6.861                          | 980.97             | 6730.24            | 1.875                          | 602.40             | 1129.66            |
| A_68_P27278518 | chr10:79187320-79187368                           | NM_008226:7966   | Hcn2       | INSIDE                 | 0.645                                                        | 4.968                          | 177.15             | 880.01             | 3.205                          | 190.86             | 611.75             |

| ProbeName      | Target position of probe on CpG island microarray | TargetID           | GeneSymbol | CpG island Description | Ratio of relative methylation (TiO <sub>2</sub> -NP/Vehicle) | Sham group                     |                    |                    | TiO <sub>2</sub> -H group      |                    |                    |
|----------------|---------------------------------------------------|--------------------|------------|------------------------|--------------------------------------------------------------|--------------------------------|--------------------|--------------------|--------------------------------|--------------------|--------------------|
|                |                                                   |                    |            |                        |                                                              | Relative methylation (Cy5/Cy3) | Cy3 signal (Input) | Cy5 signal (MeDIP) | Relative methylation (Cy5/Cy3) | Cy3 signal (Input) | Cy5 signal (MeDIP) |
| A_68_P26550035 | chr9:58671367-58671411                            | NM_001081192:70    | Hcn4       | INSIDE                 | 0.495                                                        | 3.593                          | 2133.88            | 7667.67            | 1.779                          | 1610.75            | 2865.05            |
| A_68_P26550037 | chr9:58671573-58671617                            | NM_001081192:276   | Hcn4       | INSIDE                 | 0.321                                                        | 0.547                          | 1131.29            | 618.76             | 0.175                          | 976.33             | 171.31             |
| A_68_P26550025 | chr9:58670099-58670144                            | NM_001081192:-1197 | Hcn4       | PROMOTER               | 0.147                                                        | 1.622                          | 1161.93            | 1884.44            | 0.238                          | 881.33             | 210.06             |
| A_68_P26550039 | chr9:58671843-58671887                            | NM_001081192:546   | Hcn4       | INSIDE                 | 0.523                                                        | 3.016                          | 983.49             | 2966.56            | 1.577                          | 829.24             | 1307.57            |
| A_68_P23300608 | chr4:129815629-129815674                          | NM_001163027:144   | Hcrtr1     | INSIDE                 | 0.393                                                        | 6.966                          | 614.43             | 4280.19            | 2.741                          | 713.03             | 1954.45            |
| A_68_P23300616 | chr4:129816532-129816576                          | NM_198959:-148     | Hcrtr1     | PROMOTER               | 0.556                                                        | 0.198                          | 7853.64            | 1558.28            | 0.11                           | 5354.20            | 591.01             |
| A_68_P23300612 | chr4:129816147-129816191                          | NM_001163027:-373  | Hcrtr1     | PROMOTER               | 0.397                                                        | 3.523                          | 3720.86            | 13108.15           | 1.398                          | 3072.11            | 4296.04            |
| A_68_P26648623 | chr9:76171335-76171379                            | NM_198962:29       | Hcrtr2     | INSIDE                 | 0.464                                                        | 4.003                          | 1175.58            | 4706.16            | 1.857                          | 1097.69            | 2038.65            |
| A_68_P23297200 | chr4:129219696-129219740                          | NM_008228:172      | Hdac1      | INSIDE                 | 0.166                                                        | 0.385                          | 6590.63            | 2537.30            | 0.064                          | 4746.96            | 303.75             |
| A_68_P24637122 | chr6:91107049-91107096                            | NM_144919:264      | Hdac11     | INSIDE                 | 0.034                                                        | 3.174                          | 2422.63            | 7689.29            | 0.108                          | 1633.35            | 176.01             |
| A_68_P24637121 | chr6:91106926-91106970                            | NM_144919:140      | Hdac11     | INSIDE                 | 0.317                                                        | 0.596                          | 1206.74            | 718.70             | 0.189                          | 923.26             | 174.50             |
| A_68_P27067359 | chr10:36693905-36693949                           | NM_008229:-423     | Hdac2      | PROMOTER               | 0.518                                                        | 4.334                          | 2835.53            | 12288.01           | 2.244                          | 2263.39            | 5079.76            |
| A_68_P31253728 | chr17:56219108-56219152                           | NM_008233:51       | Hdgfrp2    | INSIDE                 | 0.545                                                        | 2.589                          | 2558.01            | 6621.65            | 1.411                          | 2033.94            | 2870.84            |
| A_68_P25274810 | chr7:89078740-89078784                            | NM_013886:583      | Hdgfrp3    | INSIDE                 | 0.353                                                        | 6.275                          | 1311.28            | 8228.27            | 2.212                          | 1080.55            | 2390.19            |
| A_68_P25274814 | chr7:89079181-89079225                            | NM_013886:143      | Hdgfrp3    | INSIDE                 | 0.45                                                         | 6.436                          | 3005.13            | 19341.77           | 2.899                          | 2568.61            | 7445.94            |
| A_68_P25274817 | chr7:89079514-89079558                            | NM_013886:-191     | Hdgfrp3    | PROMOTER               | 0.574                                                        | 14.333                         | 2728.46            | 39107.26           | 8.225                          | 2238.90            | 18414.98           |
| A_68_P31845028 | chr18:77182898-77182942                           | NM_001039201:-236  | Hdhd2      | PROMOTER               | 0.205                                                        | 11.715                         | 3053.65            | 35772.05           | 2.398                          | 2668.84            | 6399.28            |
| A_68_P31845029 | chr18:77182994-77183040                           | NM_001039201:-140  | Hdhd2      | PROMOTER               | 0.48                                                         | 3.581                          | 1373.49            | 4917.88            | 1.72                           | 1094.64            | 1883.08            |
| A_68_P22964787 | chr4:62163343-62163387                            | NM_024257:-130     | Hdhd3      | PROMOTER               | 0.5                                                          | 0.206                          | 2693.60            | 554.91             | 0.103                          | 2026.34            | 208.81             |
| A_68_P22964786 | chr4:62163240-62163284                            | NM_024257:-28      | Hdhd3      | PROMOTER               | 0.613                                                        | 0.123                          | 4544.34            | 557.85             | 0.075                          | 3227.90            | 242.78             |
| A_68_P20455835 | chr1:95374821-95374865                            | NM_133808:543      | Hdlbp      | INSIDE                 | 0.252                                                        | 21.863                         | 1641.39            | 35885.35           | 5.513                          | 1553.66            | 8565.40            |
| A_68_P20455837 | chr1:95375021-95375065                            | NM_133808:343      | Hdlbp      | INSIDE                 | 0.481                                                        | 0.338                          | 2888.38            | 977.65             | 0.163                          | 2397.49            | 390.68             |
| A_68_P20455651 | chr1:95342033-95342077                            | NM_133808:33331    | Hdlbp      | INSIDE                 | 0.644                                                        | 2.679                          | 1747.31            | 4681.35            | 1.724                          | 1468.56            | 2532.06            |
| A_68_P24133859 | chr5:139625867-139625911                          | NM_001081265:-288  | Heatr2     | PROMOTER               | 0.206                                                        | 2.529                          | 10625.35           | 26867.62           | 0.521                          | 7252.67            | 3781.35            |
| A_68_P24133861 | chr5:139626021-139626065                          | NM_001081265:-134  | Heatr2     | PROMOTER               | 0.327                                                        | 14.750                         | 14452.78           | 213173.20          | 4.822                          | 11343.23           | 54701.27           |
| A_68_P24133858 | chr5:139625772-139625819                          | NM_001081265:-381  | Heatr2     | PROMOTER               | 0.526                                                        | 7.488                          | 1040.73            | 7792.57            | 3.939                          | 505.93             | 1992.65            |
| A_68_P24133860 | chr5:139625951-139625996                          | NM_001081265:-203  | Heatr2     | PROMOTER               | 0.292                                                        | 4.837                          | 5194.57            | 25127.28           | 1.413                          | 2931.70            | 4141.60            |
| A_68_P26039225 | chr8:90661714-90661758                            | NM_172757:-47      | Heatr3     | PROMOTER               | 0.408                                                        | 4.620                          | 3666.96            | 16940.39           | 1.887                          | 2985.46            | 5632.95            |
| A_68_P28432638 | chr12:53072168-53072212                           | NM_177171:118      | Heatr5a    | INSIDE                 | 0.55                                                         | 0.427                          | 2112.74            | 901.09             | 0.234                          | 1807.79            | 423.72             |
| A_68_P28432636 | chr12:53071968-53072012                           | NM_177171:318      | Heatr5a    | INSIDE                 | 0.589                                                        | 4.370                          | 3285.24            | 14357.79           | 2.573                          | 2602.22            | 6694.56            |
| A_68_P28431905 | chr12:52930950-52930994                           | NM_144788:-449     | Hectd1     | PROMOTER               | 0.431                                                        | 5.932                          | 742.76             | 4406.16            | 2.557                          | 650.61             | 1663.77            |
| A_68_P28431901 | chr12:52930414-52930458                           | NM_144788:87       | Hectd1     | INSIDE                 | 0.62                                                         | 3.725                          | 941.58             | 3507.00            | 2.308                          | 811.98             | 1874.11            |
| A_68_P28431895 | chr12:52929741-52929785                           | NM_144788:761      | Hectd1     | INSIDE                 | 0.523                                                        | 3.929                          | 471.13             | 1850.83            | 2.055                          | 417.24             | 857.61             |
| A_68_P20235844 | chr1:54251715-54251759                            | NM_001001883:142   | Hecw2      | INSIDE                 | 0.494                                                        | 3.996                          | 1172.16            | 4683.99            | 1.975                          | 999.05             | 1972.82            |
| A_68_P30659187 | chr16:33684576-33684620                           | NM_175256:47       | Heg1       | INSIDE                 | 0.467                                                        | 11.606                         | 2904.55            | 33710.47           | 5.419                          | 2428.71            | 13160.77           |
| A_68_P27495356 | chr10:119549659-119549703                         | NM_080446:341      | Helb       | INSIDE                 | 0.519                                                        | 3.696                          | 1984.87            | 7336.08            | 1.918                          | 1776.38            | 3406.32            |
| A_68_P23931501 | chr5:101227554-101227598                          | NM_001081107:43    | Helq       | INSIDE                 | 0.493                                                        | 0.687                          | 885.81             | 608.77             | 0.339                          | 718.75             | 243.49             |
| A_68_P25835333 | chr8:47377718-47377762                            | NM_173789:2285     | Helt       | INSIDE                 | 0.647                                                        | 0.388                          | 1629.76            | 632.28             | 0.251                          | 1314.19            | 329.79             |
| A_68_P28107584 | chr11:107408339-107408383                         | NM_198298:-913     | Helz       | PROMOTER               | 0.537                                                        | 0.277                          | 1664.59            | 461.48             | 0.149                          | 1172.69            | 174.50             |
| A_68_P28107590 | chr11:107409081-107409125                         | NM_198298:-171     | Helz       | PROMOTER               | 0.38                                                         | 4.164                          | 2818.39            | 11737.05           | 1.583                          | 2334.80            | 3694.91            |
| A_68_P26807873 | chr9:107240712-107240756                          | NM_133984:-53      | Hemk1      | DIVERGENT_PROMOTER     | 0.492                                                        | 0.552                          | 2410.42            | 1329.71            | 0.272                          | 1869.43            | 507.86             |
| A_68_P26807872 | chr9:107240552-107240596                          | NM_133984:107      | Hemk1      | INSIDE                 | 0.593                                                        | 0.268                          | 1763.67            | 471.96             | 0.159                          | 1443.30            | 228.89             |
| A_68_P26807870 | chr9:107240416-107240460                          | NM_133984:243      | Hemk1      | INSIDE                 | 0.503                                                        | 0.594                          | 943.97             | 560.49             | 0.299                          | 823.36             | 246.04             |
| A_68_P26430295 | chr9:37192346-37192390                            | NM_175189:-17178   | Hepacam    | INSIDE                 | 0.617                                                        | 2.931                          | 1242.31            | 3640.65            | 1.809                          | 1003.58            | 1815.85            |
| A_68_P24483218 | chr6:58781700-58781744                            | NM_028705:-1971    | Herc3      | PROMOTER               | 0.526                                                        | 3.273                          | 954.60             | 3124.68            | 1.722                          | 818.52             | 1409.32            |
| A_68_P26077217 | chr8:96910495-96910539                            | NM_022331:117      | Herpud1    | INSIDE                 | 0.342                                                        | 13.190                         | 2565.41            | 33837.97           | 4.507                          | 2149.97            | 9690.51            |

| ProbeName      | Target position of probe on CpG island microarray | TargetID           | GeneSymbol | CpG island Description | Ratio of relative methylation (TiO <sub>2</sub> -NP/Vehicle) | Sham group                     |                    |                    | TiO <sub>2</sub> -H group      |                    |                    |
|----------------|---------------------------------------------------|--------------------|------------|------------------------|--------------------------------------------------------------|--------------------------------|--------------------|--------------------|--------------------------------|--------------------|--------------------|
|                |                                                   |                    |            |                        |                                                              | Relative methylation (Cy5/Cy3) | Cy3 signal (Input) | Cy5 signal (MeDIP) | Relative methylation (Cy5/Cy3) | Cy3 signal (Input) | Cy5 signal (MeDIP) |
| A_68_P30639626 | chr16:30064558-30064602                           | NM_008235:-862     | Hes1       | PROMOTER               | 0.38                                                         | 8.693                          | 2306.54            | 20051.64           | 3.305                          | 1972.99            | 6520.56            |
| A_68_P30639627 | chr16:30064633-30064677                           | NM_008235:-788     | Hes1       | PROMOTER               | 0.367                                                        | 0.611                          | 1361.17            | 832.21             | 0.225                          | 1126.74            | 253.01             |
| A_68_P23417739 | chr4:151660365-151660409                          | NM_008237:5385     | Hes3       | INSIDE                 | 0.645                                                        | 2.597                          | 4746.14            | 12325.37           | 1.676                          | 3047.20            | 5105.66            |
| A_68_P23417770 | chr4:151664569-151664614                          | NM_008237:1180     | Hes3       | INSIDE                 | 0.629                                                        | 0.664                          | 852.40             | 566.25             | 0.418                          | 670.87             | 280.39             |
| A_68_P20442328 | chr1:93309360-93309404                            | NM_019479:417      | Hes6       | INSIDE                 | 0.502                                                        | 0.697                          | 1778.32            | 1240.26            | 0.35                           | 1506.30            | 526.86             |
| A_68_P27893215 | chr11:68935929-68935973                           | NM_033041:1996     | Hes7       | INSIDE                 | 0.495                                                        | 0.497                          | 5916.12            | 2940.40            | 0.246                          | 3985.07            | 980.90             |
| A_68_P27893214 | chr11:68935855-68935899                           | NM_033041:1922     | Hes7       | INSIDE                 | 0.038                                                        | 1.343                          | 7920.47            | 10640.04           | 0.051                          | 4879.46            | 249.53             |
| A_68_P28083427 | chr11:102977675-102977719                         | NM_138753:58       | Hexim1     | INSIDE                 | 0.411                                                        | 0.304                          | 1839.15            | 558.66             | 0.125                          | 1383.55            | 172.59             |
| A_68_P28083517 | chr11:102994122-102994166                         | NM_001130516:-508  | Hexim2     | PROMOTER               | 0.498                                                        | 5.407                          | 2192.67            | 11856.64           | 2.692                          | 1761.39            | 4741.82            |
| A_68_P21933421 | chr3:8667100-8667144                              | NM_010423:-84      | Hey1       | PROMOTER               | 0.388                                                        | 5.658                          | 614.06             | 3474.22            | 2.195                          | 652.36             | 1432.15            |
| A_68_P27041764 | chr10:30562697-30562741                           | NM_013904:-129     | Hey2       | PROMOTER               | 0.319                                                        | 9.269                          | 346.46             | 3211.26            | 2.958                          | 370.32             | 1095.37            |
| A_68_P23964040 | chr5:107354969-107355013                          | NM_177873:-81      | Hfm1       | PROMOTER               | 0.593                                                        | 0.487                          | 2482.71            | 1208.85            | 0.289                          | 2162.09            | 624.19             |
| A_68_P28184739 | chr11:120329033-120329077                         | NM_001159328:106   | Hgs        | INSIDE                 | 0.436                                                        | 3.905                          | 2232.94            | 8719.56            | 1.702                          | 2063.40            | 3512.27            |
| A_68_P25729953 | chr8:27086780-27086824                            | NM_029884:414      | Hgsnat     | INSIDE                 | 0.286                                                        | 8.180                          | 1564.06            | 12793.88           | 2.338                          | 1299.35            | 3037.95            |
| A_68_P20945385 | chr1:194596745-194596789                          | NM_144881:647      | Hhat       | INSIDE                 | 0.631                                                        | 2.753                          | 3309.90            | 9113.81            | 1.737                          | 2528.30            | 4391.43            |
| A_68_P32095553 | chr19:37509433-37509477                           | NM_008245:124      | Hhex       | INSIDE                 | 0.335                                                        | 8.485                          | 3993.14            | 33881.85           | 2.841                          | 3198.22            | 9086.96            |
| A_68_P25997733 | chr8:82581462-82581506                            | NM_020259:423      | Hhip       | INSIDE                 | 0.586                                                        | 0.405                          | 2250.09            | 911.88             | 0.238                          | 1891.96            | 449.61             |
| A_68_P28727298 | chr12:109557168-109557212                         | NM_001044380:12711 | Hhip11     | INSIDE                 | 0.314                                                        | 5.578                          | 977.29             | 5451.23            | 1.751                          | 750.86             | 1314.66            |
| A_68_P22450560 | chr3:116365543-116365587                          | NM_008246:31       | Hiat1      | INSIDE                 | 0.198                                                        | 17.471                         | 1432.24            | 25023.23           | 3.453                          | 1228.92            | 4242.89            |
| A_68_P22450556 | chr3:116365109-116365153                          | NM_008246:465      | Hiat1      | INSIDE                 | 0.429                                                        | 7.209                          | 733.42             | 5287.09            | 3.093                          | 672.50             | 2080.28            |
| A_68_P22450555 | chr3:116364918-116364962                          | NM_008246:655      | Hiat1      | INSIDE                 | 0.605                                                        | 4.102                          | 1338.61            | 5491.50            | 2.48                           | 1118.94            | 2774.89            |
| A_68_P24451816 | chr6:52590190-52590234                            | NM_145567:82       | Hibadh     | INSIDE                 | 0.655                                                        | 0.721                          | 1735.81            | 1252.15            | 0.473                          | 1489.72            | 704.01             |
| A_68_P27924602 | chr11:74984051-74984095                           | NM_010430:-315     | Hic1       | DIVERGENT_PROMOTER     | 0.183                                                        | 19.888                         | 1652.73            | 32868.68           | 3.631                          | 1678.06            | 6092.22            |
| A_68_P27924582 | chr11:74981827-74981871                           | NM_001098203:-194  | Hic1       | PROMOTER               | 0.433                                                        | 0.477                          | 4246.15            | 2027.22            | 0.207                          | 2986.27            | 616.86             |
| A_68_P27924600 | chr11:74983847-74983891                           | NM_010430:-111     | Hic1       | DIVERGENT_PROMOTER     | 0.497                                                        | 4.318                          | 971.09             | 4193.66            | 2.148                          | 919.26             | 1974.56            |
| A_68_P27924590 | chr11:74982634-74982678                           | NM_001098203:-1002 | Hic1       | PROMOTER               | 0.641                                                        | 3.948                          | 1060.59            | 4187.26            | 2.529                          | 916.36             | 2317.76            |
| A_68_P27924566 | chr11:74979860-74979904                           | NM_001098203:1772  | Hic1       | INSIDE                 | 0.513                                                        | 0.621                          | 1543.63            | 958.02             | 0.319                          | 1165.94            | 371.37             |
| A_68_P27924569 | chr11:74980234-74980278                           | NM_001098203:1398  | Hic1       | INSIDE                 | 0.6                                                          | 0.671                          | 1636.02            | 1097.06            | 0.403                          | 1372.84            | 552.72             |
| A_68_P27924599 | chr11:74983746-74983790                           | NM_010430:-11      | Hic1       | DIVERGENT_PROMOTER     | 0.308                                                        | 1.820                          | 2305.96            | 4197.79            | 0.56                           | 1588.99            | 890.17             |
| A_68_P27924570 | chr11:74980316-74980360                           | NM_001098203:1316  | Hic1       | INSIDE                 | 0.496                                                        | 0.505                          | 945.92             | 477.99             | 0.25                           | 689.26             | 172.62             |
| A_68_P30572653 | chr16:17233627-17233671                           | NM_178922:-31      | Hic2       | PROMOTER               | 0.302                                                        | 12.445                         | 2297.73            | 28595.64           | 3.761                          | 1898.42            | 7139.92            |
| A_68_P28540462 | chr12:75009562-75009606                           | NM_010431:731      | Hif1a      | INSIDE                 | 0.332                                                        | 9.804                          | 1876.72            | 18399.44           | 3.254                          | 1756.38            | 5714.59            |
| A_68_P27040510 | chr10:30337995-30338039                           | NM_025798:156      | Hint3      | INSIDE                 | 0.425                                                        | 7.280                          | 1206.29            | 8781.89            | 3.09                           | 938.87             | 2901.56            |
| A_68_P24116580 | chr5:135964648-135964692                          | NM_146001:56322    | Hip1       | INSIDE                 | 0.383                                                        | 15.193                         | 2283.18            | 34687.93           | 5.811                          | 1991.82            | 11575.14           |
| A_68_P24116811 | chr5:136020789-136020833                          | NM_146001:182      | Hip1       | INSIDE                 | 0.459                                                        | 0.306                          | 1711.51            | 523.75             | 0.14                           | 1248.87            | 175.35             |
| A_68_P24058535 | chr5:124423625-124423669                          | NM_145070:10       | Hip1r      | INSIDE                 | 0.313                                                        | 7.355                          | 2396.38            | 17625.96           | 2.302                          | 2000.57            | 4604.78            |
| A_68_P22388055 | chr3:103594904-103594948                          | NM_010432:272      | Hipk1      | INSIDE                 | 0.337                                                        | 0.507                          | 1403.59            | 710.94             | 0.171                          | 1077.12            | 184.08             |
| A_68_P22388058 | chr3:103595426-103595470                          | NM_010432:-250     | Hipk1      | PROMOTER               | 0.436                                                        | 0.650                          | 1861.81            | 1210.07            | 0.283                          | 1625.81            | 460.62             |
| A_68_P24380025 | chr6:38826655-38826699                            | NM_010433:-487     | Hipk2      | PROMOTER               | 0.499                                                        | 4.138                          | 1462.86            | 6052.62            | 2.064                          | 1272.01            | 2625.20            |
| A_68_P21489528 | chr2:104334070-104334114                          | NM_001145824:554   | Hipk3      | INSIDE                 | 0.516                                                        | 3.319                          | 1257.86            | 4174.89            | 1.714                          | 1185.29            | 2031.60            |
| A_68_P26954155 | chr10:13685730-13685774                           | NM_010437:-432     | Hivep2     | PROMOTER               | 0.163                                                        | 18.094                         | 3983.63            | 72080.82           | 2.947                          | 3668.21            | 10811.27           |
| A_68_P26954148 | chr10:13684931-13684975                           | NM_010437:-1232    | Hivep2     | PROMOTER               | 0.372                                                        | 11.818                         | 1911.70            | 22591.53           | 4.397                          | 1901.72            | 8361.35            |
| A_68_P26954164 | chr10:13687012-13687056                           | NM_010437:850      | Hivep2     | INSIDE                 | 0.585                                                        | 5.661                          | 888.05             | 5027.48            | 3.311                          | 799.37             | 2647.04            |
| A_68_P26954156 | chr10:13685876-13685920                           | NM_010437:-286     | Hivep2     | PROMOTER               | 0.592                                                        | 2.770                          | 2655.91            | 7356.14            | 1.639                          | 1959.55            | 3211.82            |
| A_68_P26954153 | chr10:13685444-13685488                           | NM_010437:-718     | Hivep2     | PROMOTER               | 0.415                                                        | 3.528                          | 1426.40            | 5032.53            | 1.462                          | 1267.20            | 1853.18            |
| A_68_P27185079 | chr10:61732442-61732486                           | NM_001146100:70705 | Hkl        | INSIDE                 | 0.358                                                        | 5.186                          | 3663.08            | 18996.14           | 1.856                          | 2365.73            | 4391.54            |

| ProbeName      | Target position of probe on CpG island microarray | TargetID           | GeneSymbol | CpG island Description | Ratio of relative methylation (TiO <sub>2</sub> -NP/Vehicle) | Sham group                     |                    |                    | TiO <sub>2</sub> -H group      |                    |                    |
|----------------|---------------------------------------------------|--------------------|------------|------------------------|--------------------------------------------------------------|--------------------------------|--------------------|--------------------|--------------------------------|--------------------|--------------------|
|                |                                                   |                    |            |                        |                                                              | Relative methylation (Cy5/Cy3) | Cy3 signal (Input) | Cy5 signal (MeDIP) | Relative methylation (Cy5/Cy3) | Cy3 signal (Input) | Cy5 signal (MeDIP) |
| A_68_P27185080 | chr10:61732562-61732606                           | NM_001146100:70585 | Hk1        | INSIDE                 | 0.574                                                        | 21.237                         | 2914.56            | 61897.34           | 12.193                         | 2377.54            | 28989.19           |
| A_68_P27185476 | chr10:61802626-61802671                           | NM_001146100:521   | Hk1        | INSIDE                 | 0.454                                                        | 0.677                          | 2861.20            | 1937.66            | 0.308                          | 2117.44            | 651.59             |
| A_68_P24589794 | chr6:82723294-82723338                            | NM_013820:1132     | Hk2        | INSIDE                 | 0.356                                                        | 0.256                          | 2175.77            | 557.57             | 0.091                          | 1885.48            | 172.02             |
| A_68_P24589795 | chr6:82723374-82723418                            | NM_013820:1052     | Hk2        | INSIDE                 | 0.446                                                        | 0.687                          | 2554.65            | 1755.07            | 0.306                          | 2229.60            | 682.80             |
| A_68_P21978078 | chr3:19957968-19958012                            | NM_144959:180      | Hlhf       | INSIDE                 | 0.131                                                        | 33.226                         | 5464.91            | 181574.70          | 4.368                          | 5318.58            | 23230.84           |
| A_68_P20897050 | chr1:186542380-186542424                          | NM_008250:13970    | Hlx        | DOWNSTREAM             | 0.449                                                        | 5.144                          | 1415.69            | 7282.56            | 2.308                          | 1250.52            | 2886.21            |
| A_68_P20897049 | chr1:186542249-186542293                          | NM_008250:14102    | Hlx        | DOWNSTREAM             | 0.594                                                        | 0.488                          | 1327.74            | 647.62             | 0.29                           | 1139.57            | 330.15             |
| A_68_P20897052 | chr1:186542532-186542576                          | NM_008250:13818    | Hlx        | DOWNSTREAM             | 0.432                                                        | 0.509                          | 941.78             | 479.40             | 0.22                           | 816.29             | 179.55             |
| A_68_P27289029 | chr10:80809838-80809882                           | NM_001163165:3311  | Hmg20b     | INSIDE                 | 0.266                                                        | 16.925                         | 1854.76            | 31391.82           | 4.505                          | 1274.50            | 5741.75            |
| A_68_P27289055 | chr10:80813338-80813382                           | NM_001163166:-158  | Hmg20b     | DIVERGENT_PROMOTER     | 0.43                                                         | 6.851                          | 5741.55            | 39337.41           | 2.946                          | 4085.62            | 12034.82           |
| A_68_P27289051 | chr10:80812913-80812957                           | NM_001163165:237   | Hmg20b     | INSIDE                 | 0.568                                                        | 0.369                          | 1489.33            | 549.71             | 0.21                           | 1183.52            | 248.28             |
| A_68_P27289026 | chr10:80809521-80809565                           | NM_001163165:3629  | Hmg20b     | INSIDE                 | 0.599                                                        | 5.368                          | 1920.92            | 10312.00           | 3.217                          | 1791.67            | 5764.31            |
| A_68_P27289052 | chr10:80813045-80813089                           | NM_001163165:105   | Hmg20b     | INSIDE                 | 0.618                                                        | 0.549                          | 1560.79            | 856.29             | 0.339                          | 1217.17            | 412.93             |
| A_68_P31117105 | chr17:27693117-27693161                           | NM_001025427:-380  | Hmga1      | PROMOTER               | 0.595                                                        | 10.623                         | 898.14             | 9541.14            | 6.322                          | 762.59             | 4820.81            |
| A_68_P31117097 | chr17:27692164-27692208                           | NM_001025427:-1332 | Hmga1      | PROMOTER               | 0.6                                                          | 6.284                          | 1209.90            | 7602.54            | 3.767                          | 1051.27            | 3960.53            |
| A_68_P31117117 | chr17:27694485-27694529                           | NM_001166476:909   | Hmga1-rs1  | INSIDE                 | 0.476                                                        | 7.577                          | 4539.78            | 34397.05           | 3.605                          | 3276.07            | 11808.89           |
| A_68_P27497678 | chr10:119913602-119913646                         | NM_010441:367      | Hmga2      | INSIDE                 | 0.234                                                        | 36.455                         | 884.15             | 32231.96           | 8.518                          | 1384.54            | 11793.17           |
| A_68_P27497681 | chr10:119914095-119914139                         | NM_010441:-125     | Hmga2      | PROMOTER               | 0.267                                                        | 7.840                          | 1987.12            | 15578.65           | 2.095                          | 1722.23            | 3608.59            |
| A_68_P27497666 | chr10:119912069-119912113                         | NM_010441:1901     | Hmga2      | INSIDE                 | 0.618                                                        | 0.280                          | 2463.22            | 689.41             | 0.173                          | 1661.37            | 287.53             |
| A_68_P27497667 | chr10:119912187-119912231                         | NM_010441:1783     | Hmga2      | INSIDE                 | 0.523                                                        | 0.477                          | 939.19             | 447.68             | 0.249                          | 689.79             | 171.96             |
| A_68_P32454254 | chrX:68810106-68810150                            | NM_008253:961      | Hmgb3      | INSIDE                 | 0.162                                                        | 18.039                         | 436.64             | 7876.60            | 2.917                          | 591.35             | 1725.19            |
| A_68_P23331345 | chr4:135502447-135502491                          | NM_008254:101      | Hmgcl      | INSIDE                 | 0.654                                                        | 0.608                          | 1367.65            | 831.00             | 0.398                          | 1049.18            | 417.24             |
| A_68_P30991207 | chr16:96348653-96348697                           | NM_008251:658      | Hmgn1      | INSIDE                 | 0.289                                                        | 7.886                          | 5024.79            | 39623.60           | 2.279                          | 3933.67            | 8964.38            |
| A_68_P30991213 | chr16:96349447-96349491                           | NM_008251:-136     | Hmgn1      | PROMOTER               | 0.597                                                        | 0.436                          | 4737.17            | 2063.08            | 0.26                           | 3741.26            | 973.10             |
| A_68_P30991212 | chr16:96349324-96349368                           | NM_008251:-14      | Hmgn1      | PROMOTER               | 0.447                                                        | 1.663                          | 6448.44            | 10724.32           | 0.744                          | 5013.27            | 3730.00            |
| A_68_P23320290 | chr4:133524024-133524068                          | NM_016957:-140     | Hmgn2      | PROMOTER               | 0.496                                                        | 4.606                          | 2875.39            | 13243.59           | 2.283                          | 2416.42            | 5515.89            |
| A_68_P26682076 | chr9:83039410-83039454                            | NM_026122:782      | Hmgn3      | INSIDE                 | 0.625                                                        | 0.463                          | 1642.78            | 760.06             | 0.289                          | 1237.20            | 357.97             |
| A_68_P25971363 | chr8:77517838-77517882                            | NM_178017:259      | Hmgxb4     | INSIDE                 | 0.622                                                        | 5.667                          | 1304.00            | 7390.26            | 3.525                          | 1090.59            | 3844.49            |
| A_68_P23600267 | chr5:35740761-35740805                            | NM_010445:9017     | Hmx1       | DOWNSTREAM             | 0.543                                                        | 0.358                          | 1608.62            | 575.65             | 0.194                          | 1263.66            | 245.40             |
| A_68_P23600191 | chr5:35731800-35731844                            | NM_010445:57       | Hmx1       | INSIDE                 | 0.447                                                        | 3.596                          | 902.38             | 3244.72            | 1.606                          | 791.01             | 1270.17            |
| A_68_P25528895 | chr7:138685558-138685602                          | NM_008257:-896     | Hmx3       | PROMOTER               | 0.204                                                        | 15.034                         | 811.86             | 12205.31           | 3.068                          | 712.80             | 2186.93            |
| A_68_P25528898 | chr7:138685827-138685871                          | NM_008257:-628     | Hmx3       | PROMOTER               | 0.395                                                        | 8.652                          | 323.81             | 2801.55            | 3.419                          | 308.96             | 1056.24            |
| A_68_P25528897 | chr7:138685710-138685754                          | NM_008257:-744     | Hmx3       | PROMOTER               | 0.55                                                         | 6.961                          | 2094.81            | 14582.64           | 3.828                          | 1707.81            | 6537.35            |
| A_68_P21345221 | chr2:75497073-75497117                            | NM_053263:-221     | Hnmpa3     | PROMOTER               | 0.609                                                        | 0.665                          | 808.30             | 537.82             | 0.405                          | 716.29             | 290.38             |
| A_68_P29604760 | chr14:52723420-52723464                           | NM_001170981:261   | Hnmpc      | INSIDE                 | 0.449                                                        | 5.877                          | 2695.94            | 15843.90           | 2.642                          | 2393.20            | 6322.00            |
| A_68_P23927133 | chr5:100407179-100407223                          | NM_001077265:757   | Hnmpd      | INSIDE                 | 0.192                                                        | 0.661                          | 8208.25            | 5425.04            | 0.127                          | 5011.45            | 636.97             |
| A_68_P23927140 | chr5:100408133-100408177                          | NM_001077265:-197  | Hnmpd      | PROMOTER               | 0.235                                                        | 6.833                          | 1933.32            | 13209.58           | 1.604                          | 1529.46            | 2453.81            |
| A_68_P24783935 | chr6:117857266-117857310                          | NM_001166428:-533  | Hnmpf      | PROMOTER               | 0.313                                                        | 13.451                         | 3197.36            | 43008.23           | 4.213                          | 2590.15            | 10912.60           |
| A_68_P24784010 | chr6:117867385-117867429                          | NM_001166427:95    | Hnmpf      | INSIDE                 | 0.423                                                        | 12.559                         | 2033.11            | 25534.01           | 5.309                          | 1853.52            | 9839.65            |
| A_68_P24784008 | chr6:117867198-117867242                          | NM_001166427:-91   | Hnmpf      | PROMOTER               | 0.481                                                        | 4.328                          | 3074.48            | 13306.78           | 2.082                          | 2613.45            | 5439.97            |
| A_68_P24784006 | chr6:117866996-117867040                          | NM_001166427:-293  | Hnmpf      | PROMOTER               | 0.509                                                        | 6.218                          | 2874.88            | 17875.18           | 3.167                          | 2570.96            | 8141.43            |
| A_68_P24783941 | chr6:117857819-117857863                          | NM_001166427:-9471 | Hnmpf      | PROMOTER               | 0.564                                                        | 12.162                         | 744.48             | 9054.49            | 6.859                          | 907.09             | 6221.42            |
| A_68_P27788199 | chr11:50190689-50190733                           | NM_021510:-510     | Hnmp1      | PROMOTER               | 0.173                                                        | 28.444                         | 4066.40            | 115663.80          | 4.911                          | 3731.46            | 18325.90           |
| A_68_P27788210 | chr11:50191797-50191841                           | NM_021510:598      | Hnmp1      | INSIDE                 | 0.592                                                        | 0.476                          | 2356.37            | 1120.75            | 0.281                          | 1778.98            | 500.75             |
| A_68_P27189024 | chr10:62485962-62486006                           | NM_001079824:613   | Hnmp3      | INSIDE                 | 0.653                                                        | 0.502                          | 3207.96            | 1610.80            | 0.328                          | 2394.68            | 785.23             |
| A_68_P25023673 | chr7:29596377-29596421                            | NM_177301:490      | Hnmp1      | INSIDE                 | 0.311                                                        | 7.520                          | 2200.99            | 16550.83           | 2.336                          | 1825.02            | 4263.84            |

| ProbeName      | Target position of probe on CpG island microarray | TargetID           | GeneSymbol | CpG island Description | Ratio of relative methylation (TiO <sub>2</sub> -NP/Vehicle) | Sham group                     |                    |                    | TiO <sub>2</sub> -H group      |                    |                    |
|----------------|---------------------------------------------------|--------------------|------------|------------------------|--------------------------------------------------------------|--------------------------------|--------------------|--------------------|--------------------------------|--------------------|--------------------|
|                |                                                   |                    |            |                        |                                                              | Relative methylation (Cy5/Cy3) | Cy3 signal (Input) | Cy5 signal (MeDIP) | Relative methylation (Cy5/Cy3) | Cy3 signal (Input) | Cy5 signal (MeDIP) |
| A_68_P25023656 | chr7:29594118-29594162                            | NM_177301:-1768    | Hnrnp1     | PROMOTER               | 0.472                                                        | 4.505                          | 1315.37            | 5925.28            | 2.128                          | 1051.94            | 2238.01            |
| A_68_P25023658 | chr7:29594290-29594344                            | NM_177301:-1592    | Hnrnp1     | PROMOTER               | 0.496                                                        | 8.739                          | 1109.92            | 9700.05            | 4.335                          | 1287.04            | 5579.80            |
| A_68_P23333240 | chr4:135866700-135866744                          | NM_028871:-168     | Hnrnp1     | PROMOTER               | 0.513                                                        | 3.851                          | 1413.45            | 5442.72            | 1.977                          | 1214.01            | 2400.42            |
| A_68_P23927384 | chr5:100467950-100467994                          | NM_016690:269      | Hnrpd1     | INSIDE                 | 0.134                                                        | 43.715                         | 3714.95            | 162398.80          | 5.868                          | 4379.64            | 25700.04           |
| A_68_P23927390 | chr5:100468503-100468547                          | NM_016690:-283     | Hnrpd1     | DIVERGENT_PROMOTER     | 0.659                                                        | 4.712                          | 879.10             | 4142.33            | 3.106                          | 757.38             | 2352.36            |
| A_68_P23927389 | chr5:100468389-100468433                          | NM_016690:-169     | Hnrpd1     | DIVERGENT_PROMOTER     | 0.337                                                        | 6.405                          | 693.79             | 4443.46            | 2.159                          | 558.94             | 1206.75            |
| A_68_P31381047 | chr17:80461465-80461509                           | NM_144802:188      | Hnrpl1     | INSIDE                 | 0.406                                                        | 15.690                         | 1257.37            | 19727.94           | 6.375                          | 1046.22            | 6670.04            |
| A_68_P31381046 | chr17:80461343-80461387                           | NM_144802:310      | Hnrpl1     | INSIDE                 | 0.414                                                        | 7.379                          | 1379.59            | 10180.16           | 3.057                          | 1129.01            | 3451.28            |
| A_68_P31381042 | chr17:80460659-80460703                           | NM_144802:994      | Hnrpl1     | INSIDE                 | 0.474                                                        | 0.410                          | 1544.79            | 632.75             | 0.194                          | 1168.53            | 226.70             |
| A_68_P31381048 | chr17:80461571-80461615                           | NM_144802:82       | Hnrpl1     | INSIDE                 | 0.478                                                        | 4.538                          | 2034.89            | 9234.84            | 2.169                          | 1586.21            | 3440.13            |
| A_68_P29614701 | chr14:55482992-55483036                           | NM_001177705:-19   | Homez      | PROMOTER               | 0.459                                                        | 5.566                          | 2920.09            | 16251.83           | 2.557                          | 2550.01            | 6520.29            |
| A_68_P23126053 | chr4:95633810-95633854                            | NM_030014:-237     | Hook1      | PROMOTER               | 0.425                                                        | 0.250                          | 2611.23            | 651.82             | 0.106                          | 1969.93            | 209.10             |
| A_68_P26023052 | chr8:87514587-87514631                            | NM_001167991:115   | Hook2      | INSIDE                 | 0.46                                                         | 0.377                          | 1391.61            | 525.31             | 0.174                          | 1095.09            | 190.06             |
| A_68_P26023020 | chr8:87509915-87509959                            | NM_001167991:-4557 | Hook2      | DIVERGENT_PROMOTER     | 0.608                                                        | 0.364                          | 1244.68            | 453.02             | 0.221                          | 1004.59            | 222.48             |
| A_68_P25730819 | chr8:27229628-27229672                            | NM_207659:46       | Hook3      | INSIDE                 | 0.41                                                         | 5.149                          | 1514.23            | 7796.30            | 2.113                          | 1283.95            | 2712.44            |
| A_68_P25730815 | chr8:27229276-27229320                            | NM_207659:398      | Hook3      | INSIDE                 | 0.428                                                        | 4.570                          | 1147.82            | 5245.98            | 1.956                          | 1203.31            | 2354.26            |
| A_68_P25730814 | chr8:27229164-27229208                            | NM_207659:510      | Hook3      | INSIDE                 | 0.605                                                        | 0.386                          | 1911.28            | 738.63             | 0.234                          | 1542.31            | 360.44             |
| A_68_P25730817 | chr8:27229449-27229493                            | NM_207659:226      | Hook3      | INSIDE                 | 0.626                                                        | 3.415                          | 2837.07            | 9689.55            | 2.137                          | 2199.55            | 4701.18            |
| A_68_P24448669 | chr6:52108855-52108899                            | NM_010449:-560     | Hoxa1      | PROMOTER               | 0.598                                                        | 0.338                          | 2086.70            | 706.14             | 0.202                          | 1716.31            | 347.33             |
| A_68_P24449298 | chr6:52184077-52184121                            | NM_008263:840      | Hoxa10     | INSIDE                 | 0.367                                                        | 12.663                         | 1195.87            | 15143.50           | 4.649                          | 931.42             | 4330.16            |
| A_68_P24449291 | chr6:52183467-52183515                            | NM_008263:1448     | Hoxa10     | INSIDE                 | 0.573                                                        | 0.257                          | 2769.56            | 711.49             | 0.147                          | 1872.60            | 275.52             |
| A_68_P24449398 | chr6:52195787-52195837                            | NM_010450:-46      | Hoxa11     | PROMOTER               | 0.393                                                        | 0.340                          | 1621.71            | 551.18             | 0.134                          | 1309.12            | 174.90             |
| A_68_P24449403 | chr6:52196333-52196377                            | NM_010450:-588     | Hoxa11     | PROMOTER               | 0.41                                                         | 4.278                          | 1791.22            | 7663.59            | 1.754                          | 1486.73            | 2607.06            |
| A_68_P24449396 | chr6:52195498-52195542                            | NM_010450:246      | Hoxa11     | INSIDE                 | 0.218                                                        | 2.593                          | 2456.92            | 6370.88            | 0.565                          | 1856.40            | 1049.58            |
| A_68_P24449533 | chr6:52211079-52211123                            | NM_008264:-226     | Hoxa13     | PROMOTER               | 0.184                                                        | 27.325                         | 2779.56            | 75951.19           | 5.025                          | 2595.49            | 13043.32           |
| A_68_P24449527 | chr6:52210204-52210248                            | NM_008264:648      | Hoxa13     | INSIDE                 | 0.306                                                        | 8.045                          | 1325.53            | 10664.32           | 2.463                          | 1358.88            | 3347.26            |
| A_68_P24449526 | chr6:52210086-52210130                            | NM_008264:766      | Hoxa13     | INSIDE                 | 0.583                                                        | 0.612                          | 1543.12            | 944.21             | 0.357                          | 1192.89            | 425.77             |
| A_68_P24448783 | chr6:52122417-52122461                            | NM_010452:40628    | Hoxa3      | INSIDE                 | 0.373                                                        | 0.361                          | 2282.94            | 824.36             | 0.135                          | 1770.34            | 238.52             |
| A_68_P24448786 | chr6:52122729-52122773                            | NM_010452:40316    | Hoxa3      | INSIDE                 | 0.647                                                        | 5.949                          | 2940.50            | 17492.75           | 3.85                           | 2448.92            | 9427.52            |
| A_68_P24449232 | chr6:52176211-52176255                            | NM_010456:1137     | Hoxa9      | INSIDE                 | 0.418                                                        | 4.667                          | 4308.80            | 20109.61           | 1.951                          | 3552.25            | 6930.77            |
| A_68_P24449229 | chr6:52175914-52175958                            | NM_010456:1433     | Hoxa9      | INSIDE                 | 0.645                                                        | 2.952                          | 1625.79            | 4799.94            | 1.906                          | 1360.77            | 2593.18            |
| A_68_P28043961 | chr11:96207239-96207283                           | NM_010458:2178     | Hoxb3      | INSIDE                 | 0.116                                                        | 2.713                          | 1957.52            | 5310.17            | 0.314                          | 1554.32            | 488.80             |
| A_68_P28043962 | chr11:96207315-96207359                           | NM_010458:2254     | Hoxb3      | INSIDE                 | 0.182                                                        | 2.019                          | 3111.63            | 6281.84            | 0.368                          | 2332.86            | 859.27             |
| A_68_P28043848 | chr11:96194036-96194080                           | NM_001079869:9619  | Hoxb3      | INSIDE                 | 0.66                                                         | 0.335                          | 2594.32            | 870.23             | 0.221                          | 1726.37            | 382.37             |
| A_68_P28043737 | chr11:96180501-96180545                           | NM_010459:942      | Hoxb4      | INSIDE                 | 0.035                                                        | 1.745                          | 4244.68            | 7406.77            | 0.061                          | 2806.90            | 171.78             |
| A_68_P28043617 | chr11:96166483-96166527                           | NM_008268:1679     | Hoxb5      | INSIDE                 | 0.426                                                        | 5.525                          | 7634.92            | 42183.91           | 2.351                          | 5844.08            | 13741.38           |
| A_68_P28043432 | chr11:96144310-96144354                           | NM_010461:1114     | Hoxb8      | INSIDE                 | 0.326                                                        | 8.789                          | 684.92             | 6019.69            | 2.863                          | 581.39             | 1664.65            |
| A_68_P28043442 | chr11:96145448-96145492                           | NM_010461:2252     | Hoxb8      | INSIDE                 | 0.639                                                        | 4.287                          | 2430.10            | 10416.96           | 2.74                           | 2032.91            | 5569.52            |
| A_68_P28043342 | chr11:96133436-96133480                           | NM_008270:815      | Hoxb9      | INSIDE                 | 0.382                                                        | 10.017                         | 2588.77            | 25931.84           | 3.827                          | 2366.46            | 9057.44            |
| A_68_P30501057 | chr15:102796954-102796998                         | NM_010462:-250     | Hoxc10     | PROMOTER               | 0.622                                                        | 0.627                          | 1951.61            | 1223.01            | 0.39                           | 1587.51            | 618.69             |
| A_68_P30500976 | chr15:102786820-102786864                         | NM_001024842:1886  | Hoxc11     | INSIDE                 | 0.51                                                         | 0.527                          | 3255.94            | 1716.96            | 0.269                          | 2488.92            | 669.16             |
| A_68_P30500682 | chr15:102752309-102752353                         | NM_010464:769      | Hoxc13     | INSIDE                 | 0.576                                                        | 3.756                          | 504.80             | 1896.02            | 2.163                          | 464.17             | 1004.06            |
| A_68_P30501631 | chr15:102865426-102865470                         | NM_013553:623      | Hoxc4      | INSIDE                 | 0.54                                                         | 0.372                          | 2997.88            | 1114.74            | 0.201                          | 2366.66            | 475.13             |
| A_68_P21339341 | chr2:74591156-74591200                            | NM_010467:-9858    | Hoxd1      | PROMOTER               | 0.269                                                        | 11.931                         | 3358.33            | 40069.74           | 3.213                          | 2895.54            | 9304.74            |
| A_68_P21339410 | chr2:74601035-74601079                            | NM_010467:20       | Hoxd1      | INSIDE                 | 0.636                                                        | 0.650                          | 1129.14            | 733.98             | 0.414                          | 902.76             | 373.35             |
| A_68_P21338754 | chr2:74520144-74520188                            | NM_008273:-283     | Hoxd11     | PROMOTER               | 0.29                                                         | 10.090                         | 1152.53            | 11628.88           | 2.927                          | 1130.00            | 3307.47            |



| ProbeName      | Target position of probe on CpG island microarray | TargetID            | GeneSymbol | CpG island Description | Ratio of relative methylation (TiO <sub>2</sub> -NP/Vehicle) | Sham group                     |                    |                    | TiO <sub>2</sub> -H group      |                    |                    |
|----------------|---------------------------------------------------|---------------------|------------|------------------------|--------------------------------------------------------------|--------------------------------|--------------------|--------------------|--------------------------------|--------------------|--------------------|
|                |                                                   |                     |            |                        |                                                              | Relative methylation (Cy5/Cy3) | Cy3 signal (Input) | Cy5 signal (MeDIP) | Relative methylation (Cy5/Cy3) | Cy3 signal (Input) | Cy5 signal (MeDIP) |
| A_68_P21338756 | chr2:74520344-74520390                            | NM_008273:-83       | Hoxd11     | PROMOTER               | 0.644                                                        | 0.497                          | 922.46             | 458.51             | 0.32                           | 703.39             | 225.13             |
| A_68_P21338643 | chr2:74506367-74506411                            | NM_008275:22        | Hoxd13     | INSIDE                 | 0.451                                                        | 4.076                          | 3412.48            | 13910.78           | 1.84                           | 2661.02            | 4895.26            |
| A_68_P21338645 | chr2:74506594-74506638                            | NM_008275:250       | Hoxd13     | INSIDE                 | 0.626                                                        | 0.326                          | 3711.37            | 1210.24            | 0.204                          | 2726.26            | 556.72             |
| A_68_P21339293 | chr2:74585053-74585097                            | NM_010468:35025     | Hoxd3      | INSIDE                 | 0.24                                                         | 0.294                          | 3664.04            | 1077.55            | 0.07                           | 2458.65            | 173.22             |
| A_68_P21339240 | chr2:74578542-74578586                            | NM_010468:28515     | Hoxd3      | INSIDE                 | 0.484                                                        | 4.150                          | 1611.23            | 6686.36            | 2.008                          | 1490.45            | 2992.35            |
| A_68_P21339003 | chr2:74549994-74550038                            | NM_010468:-33       | Hoxd3      | PROMOTER               | 0.535                                                        | 5.669                          | 390.69             | 2214.89            | 3.03                           | 356.78             | 1081.16            |
| A_68_P21339006 | chr2:74550322-74550366                            | NM_010468:295       | Hoxd3      | INSIDE                 | 0.657                                                        | 3.767                          | 1900.04            | 7157.20            | 2.473                          | 1647.51            | 4074.33            |
| A_68_P21338948 | chr2:74542744-74542788                            | NM_008276:-779      | Hoxd8      | PROMOTER               | 0.132                                                        | 30.145                         | 1083.35            | 32657.17           | 3.984                          | 1246.28            | 4965.44            |
| A_68_P21338950 | chr2:74542960-74543004                            | NM_008276:-563      | Hoxd8      | PROMOTER               | 0.506                                                        | 5.803                          | 959.04             | 5565.40            | 2.935                          | 795.92             | 2335.65            |
| A_68_P23344531 | chr4:137772915-137772959                          | NM_001122897:-109   | Hp1bp3     | PROMOTER               | 0.453                                                        | 46.508                         | 5205.70            | 242105.10          | 21.045                         | 4402.29            | 92647.28           |
| A_68_P23344527 | chr4:137772352-137772396                          | NM_001122896:-167   | Hp1bp3     | PROMOTER               | 0.55                                                         | 3.310                          | 1887.70            | 6249.09            | 1.82                           | 1593.82            | 2900.41            |
| A_68_P23295046 | chr4:128798355-128798400                          | NM_010471:158       | Hpca       | INSIDE                 | 0.499                                                        | 8.433                          | 1029.71            | 8683.63            | 4.206                          | 997.52             | 4195.85            |
| A_68_P23295047 | chr4:128798459-128798503                          | NM_010471:55        | Hpca       | INSIDE                 | 0.529                                                        | 3.339                          | 1064.16            | 3552.78            | 1.767                          | 891.83             | 1576.08            |
| A_68_P28271881 | chr12:17697954-17697998                           | NM_016677:357       | Hpca11     | INSIDE                 | 0.606                                                        | 0.179                          | 5858.35            | 1048.37            | 0.108                          | 3889.39            | 421.75             |
| A_68_P23261234 | chr4:122866488-122866532                          | NM_174998:5764      | Hpca4      | INSIDE                 | 0.248                                                        | 22.031                         | 7416.31            | 163385.30          | 5.473                          | 7757.84            | 42458.31           |
| A_68_P23261232 | chr4:122866227-122866271                          | NM_174998:5502      | Hpca4      | INSIDE                 | 0.434                                                        | 7.854                          | 3244.64            | 25482.17           | 3.409                          | 2517.96            | 8583.65            |
| A_68_P25885333 | chr8:58773316-58773360                            | NM_008278:-10       | Hpgd       | PROMOTER               | 0.489                                                        | 3.538                          | 1767.13            | 6252.74            | 1.729                          | 1377.65            | 2381.37            |
| A_68_P32385147 | chrX:50341550-50341594                            | NM_013556:318       | Hprt       | INSIDE                 | 0.283                                                        | 11.322                         | 1408.15            | 15942.46           | 3.2                            | 1739.25            | 5565.11            |
| A_68_P32385145 | chrX:50341393-50341437                            | NM_013556:160       | Hprt       | INSIDE                 | 0.664                                                        | 7.736                          | 907.96             | 7023.88            | 5.14                           | 1142.58            | 5873.30            |
| A_68_P21978014 | chr3:19935050-19935094                            | NM_001146323:238    | Hps3       | INSIDE                 | 0.363                                                        | 0.678                          | 995.89             | 675.54             | 0.246                          | 770.72             | 189.69             |
| A_68_P25101365 | chr7:54051013-54051057                            | NM_001005247:217    | Hps5       | INSIDE                 | 0.637                                                        | 0.386                          | 3602.83            | 1391.76            | 0.246                          | 2634.05            | 648.51             |
| A_68_P32141596 | chr19:46078435-46078479                           | NM_176785:489       | Hps6       | INSIDE                 | 0.504                                                        | 0.097                          | 5378.81            | 520.77             | 0.049                          | 3786.92            | 184.82             |
| A_68_P29702038 | chr14:70954648-70954692                           | NM_021877:808       | Hr         | INSIDE                 | 0.506                                                        | 2.850                          | 2602.65            | 1901.52            | 0.369                          | 2160.25            | 798.11             |
| A_68_P29702031 | chr14:70953904-70953948                           | NM_021877:64        | Hr         | INSIDE                 | 0.504                                                        | 2.850                          | 6755.28            | 19254.55           | 1.437                          | 5072.39            | 7291.46            |
| A_68_P30634660 | chr16:29210031-29210075                           | NM_013751:272       | Hrasls     | INSIDE                 | 0.038                                                        | 6.808                          | 4090.06            | 27844.91           | 0.256                          | 3070.62            | 785.46             |
| A_68_P30634661 | chr16:29210118-29210162                           | NM_013751:360       | Hrasls     | INSIDE                 | 0.207                                                        | 1.598                          | 1610.09            | 2573.39            | 0.331                          | 1239.09            | 410.17             |
| A_68_P29048046 | chr13:54287380-54287425                           | NM_008286:-95       | Hrh2       | PROMOTER               | 0.459                                                        | 6.019                          | 1033.33            | 6219.25            | 2.761                          | 884.34             | 2441.84            |
| A_68_P21901458 | chr2:179839037-179839081                          | NM_133849:-131      | Hrh3       | PROMOTER               | 0.664                                                        | 0.593                          | 7196.23            | 4270.60            | 0.394                          | 5222.48            | 2059.23            |
| A_68_P24025038 | chr5:118620106-118620150                          | NM_007545:356       | Hrk        | INSIDE                 | 0.405                                                        | 5.568                          | 1838.36            | 10236.71           | 2.253                          | 1390.75            | 3133.72            |
| A_68_P24025031 | chr5:118619337-118619381                          | NM_007545:-414      | Hrk        | PROMOTER               | 0.6                                                          | 0.302                          | 2608.62            | 789.09             | 0.181                          | 1852.22            | 335.97             |
| A_68_P22603827 | chr3:144232599-144232643                          | NM_011828:560       | Hs2st1     | INSIDE                 | 0.491                                                        | 0.525                          | 1798.73            | 943.85             | 0.257                          | 1361.95            | 350.57             |
| A_68_P22603829 | chr3:144232802-144232849                          | NM_011828:355       | Hs2st1     | INSIDE                 | 0.409                                                        | 4.233                          | 1464.18            | 6197.45            | 1.731                          | 1097.38            | 1899.86            |
| A_68_P23627551 | chr5:40035622-40035667                            | NM_010474:226       | Hs3st1     | INSIDE                 | 0.402                                                        | 3.845                          | 4406.23            | 16940.34           | 1.547                          | 3554.46            | 5497.59            |
| A_68_P25474216 | chr7:128643864-128643910                          | NM_001081327:108077 | Hs3st2     | INSIDE                 | 0.271                                                        | 23.314                         | 987.10             | 23013.58           | 6.307                          | 1326.15            | 8364.54            |
| A_68_P25473609 | chr7:128536673-128536717                          | NM_001081327:885    | Hs3st2     | INSIDE                 | 0.446                                                        | 0.319                          | 1616.53            | 515.90             | 0.142                          | 1331.88            | 189.60             |
| A_68_P27862290 | chr11:63734698-63734742                           | NM_018805:1066      | Hs3st3b1   | INSIDE                 | 0.259                                                        | 29.304                         | 2551.94            | 74782.77           | 7.579                          | 2667.89            | 20219.22           |
| A_68_P27862275 | chr11:63732951-63732995                           | NM_018805:2814      | Hs3st3b1   | INSIDE                 | 0.568                                                        | 8.484                          | 722.88             | 6132.87            | 4.819                          | 596.33             | 2873.75            |
| A_68_P27862296 | chr11:63735472-63735516                           | NM_018805:292       | Hs3st3b1   | INSIDE                 | 0.665                                                        | 0.241                          | 2218.35            | 534.22             | 0.16                           | 1689.01            | 270.32             |
| A_68_P31099381 | chr17:24889759-24889803                           | NM_001012402:-167   | Hs3st6     | PROMOTER               | 0.433                                                        | 0.377                          | 1437.71            | 542.48             | 0.163                          | 1078.25            | 175.97             |
| A_68_P20146151 | chr1:36125666-36125710                            | NM_015818:444       | Hs6st1     | INSIDE                 | 0.522                                                        | 4.377                          | 955.86             | 4183.66            | 2.283                          | 747.57             | 1707.05            |
| A_68_P32378028 | chrX:49034553-49034597                            | NM_015819:-920      | Hs6st2     | PROMOTER               | 0.049                                                        | 33.281                         | 991.44             | 32995.99           | 1.629                          | 1273.83            | 2075.54            |
| A_68_P29942854 | chr14:119537426-119537470                         | NM_015820:-38       | Hs6st3     | PROMOTER               | 0.635                                                        | 4.136                          | 1214.23            | 5021.90            | 2.627                          | 1037.33            | 2724.78            |
| A_68_P29942852 | chr14:119537211-119537255                         | NM_015820:-254      | Hs6st3     | PROMOTER               | 0.592                                                        | 2.925                          | 777.84             | 2275.28            | 1.731                          | 742.20             | 1284.88            |
| A_68_P31863131 | chr18:80433374-80433418                           | NM_001136181:10445  | Hsbp111    | INSIDE                 | 0.48                                                         | 0.365                          | 1365.02            | 497.74             | 0.175                          | 1002.66            | 175.52             |
| A_68_P26134297 | chr8:108042949-108042993                          | NM_008289:325       | Hsd11b2    | INSIDE                 | 0.417                                                        | 5.234                          | 654.69             | 3426.55            | 2.181                          | 607.34             | 1324.76            |
| A_68_P28071796 | chr11:100941137-100941181                         | NM_010475:1434      | Hsd11b1    | INSIDE                 | 0.376                                                        | 0.429                          | 1533.39            | 658.38             | 0.162                          | 1070.95            | 173.02             |

| ProbeName      | Target position of probe on CpG island microarray | TargetID           | GeneSymbol | CpG island Description | Ratio of relative methylation (TiO <sub>2</sub> -NP/Vehicle) | Sham group                     |                    |                    | TiO <sub>2</sub> -H group      |                    |                    |
|----------------|---------------------------------------------------|--------------------|------------|------------------------|--------------------------------------------------------------|--------------------------------|--------------------|--------------------|--------------------------------|--------------------|--------------------|
|                |                                                   |                    |            |                        |                                                              | Relative methylation (Cy5/Cy3) | Cy3 signal (Input) | Cy5 signal (MeDIP) | Relative methylation (Cy5/Cy3) | Cy3 signal (Input) | Cy5 signal (MeDIP) |
| A_68_P20819669 | chr1:171899278-171899322                          | NM_010476:36       | Hsd17b7    | INSIDE                 | 0.365                                                        | 0.453                          | 2407.09            | 1089.48            | 0.165                          | 1486.78            | 245.35             |
| A_68_P20819668 | chr1:171899210-171899254                          | NM_010476:104      | Hsd17b7    | INSIDE                 | 0.608                                                        | 0.661                          | 3478.82            | 2299.86            | 0.402                          | 2308.79            | 927.99             |
| A_68_P26214830 | chr8:122098835-122098879                          | NM_175185:244      | Hsd11      | INSIDE                 | 0.36                                                         | 0.686                          | 976.71             | 670.43             | 0.247                          | 850.02             | 210.30             |
| A_68_P22957168 | chr4:59594155-59594199                            | NM_024255:-258     | Hsd12      | PROMOTER               | 0.606                                                        | 2.798                          | 2946.60            | 8245.50            | 1.697                          | 2125.33            | 3605.96            |
| A_68_P30348596 | chr15:76307956-76308000                           | NM_008296:104      | Hsf1       | INSIDE                 | 0.456                                                        | 0.329                          | 2695.12            | 887.04             | 0.15                           | 1974.23            | 296.35             |
| A_68_P27160596 | chr10:57206710-57206754                           | NM_008297:542      | Hsf2       | INSIDE                 | 0.656                                                        | 2.874                          | 912.61             | 2622.59            | 1.885                          | 799.26             | 1506.65            |
| A_68_P26132621 | chr8:107793840-107793884                          | NM_011939:89       | Hsf4       | INSIDE                 | 0.625                                                        | 3.372                          | 1203.70            | 4058.35            | 2.107                          | 941.61             | 1984.28            |
| A_68_P27995284 | chr11:87452873-87452917                           | NM_001045527:22229 | Hsf5       | INSIDE                 | 0.392                                                        | 12.151                         | 1975.52            | 24003.92           | 4.759                          | 1993.58            | 9487.26            |
| A_68_P27995151 | chr11:87430824-87430868                           | NM_001045527:181   | Hsf5       | INSIDE                 | 0.539                                                        | 4.320                          | 1230.71            | 5316.17            | 2.328                          | 1094.48            | 2548.05            |
| A_68_P27995154 | chr11:87431401-87431445                           | NM_001045527:757   | Hsf5       | INSIDE                 | 0.374                                                        | 4.696                          | 1225.21            | 5753.72            | 1.758                          | 943.36             | 1658.90            |
| A_68_P27995153 | chr11:87431204-87431248                           | NM_001045527:561   | Hsf5       | INSIDE                 | 0.447                                                        | 3.834                          | 1357.53            | 5204.98            | 1.713                          | 1038.76            | 1778.89            |
| A_68_P28739824 | chr12:111934703-111934747                         | NM_010480:-119     | Hsp90aa1   | PROMOTER               | 0.348                                                        | 29.054                         | 1407.62            | 40896.73           | 10.118                         | 1432.84            | 14496.78           |
| A_68_P31201910 | chr17:45710240-45710284                           | NM_008302:-52      | Hsp90ab1   | PROMOTER               | 0.272                                                        | 6.393                          | 2650.05            | 16943.05           | 1.738                          | 2212.71            | 3844.69            |
| A_68_P28553815 | chr12:77504735-77504779                           | NM_001002012:-406  | Hspa2      | PROMOTER               | 0.334                                                        | 6.979                          | 2825.42            | 19718.34           | 2.33                           | 2677.11            | 6236.68            |
| A_68_P28553818 | chr12:77505144-77505188                           | NM_008301:-190     | Hspa2      | PROMOTER               | 0.474                                                        | 7.039                          | 2117.11            | 14902.49           | 3.335                          | 1803.55            | 6014.91            |
| A_68_P27804074 | chr11:53113101-53113145                           | NM_008300:859      | Hspa4      | INSIDE                 | 0.319                                                        | 10.167                         | 6557.04            | 66663.24           | 3.244                          | 5943.61            | 19280.61           |
| A_68_P27804084 | chr11:53114187-53114231                           | NM_008300:-227     | Hspa4      | PROMOTER               | 0.663                                                        | 0.365                          | 1310.43            | 478.09             | 0.242                          | 1130.30            | 273.34             |
| A_68_P22081210 | chr3:40548895-40548939                            | NM_011020:-618     | Hspa41     | PROMOTER               | 0.175                                                        | 12.126                         | 1087.83            | 13191.32           | 2.116                          | 1274.93            | 2698.02            |
| A_68_P22081217 | chr3:40549685-40549729                            | NM_011020:172      | Hspa41     | INSIDE                 | 0.501                                                        | 4.333                          | 1714.35            | 7427.61            | 2.17                           | 1487.79            | 3229.13            |
| A_68_P22081213 | chr3:40549234-40549278                            | NM_011020:-278     | Hspa41     | PROMOTER               | 0.537                                                        | 4.132                          | 1009.91            | 4173.25            | 2.219                          | 909.99             | 2018.91            |
| A_68_P22081212 | chr3:40549078-40549122                            | NM_011020:-434     | Hspa41     | PROMOTER               | 0.137                                                        | 3.206                          | 890.25             | 2853.76            | 0.44                           | 776.70             | 341.71             |
| A_68_P21129651 | chr2:34627506-34627550                            | NM_001163434:-81   | Hspa5      | PROMOTER               | 0.378                                                        | 0.649                          | 1035.15            | 671.54             | 0.245                          | 854.67             | 209.66             |
| A_68_P26445380 | chr9:40609023-40609067                            | NM_031165:-311     | Hspa8      | PROMOTER               | 0.213                                                        | 11.513                         | 2138.33            | 24617.57           | 2.452                          | 1811.11            | 4440.18            |
| A_68_P23364007 | chr4:140981800-140981844                          | NM_013868:5129     | Hspb7      | DOWNSTREAM             | 0.323                                                        | 0.335                          | 2220.04            | 742.98             | 0.108                          | 1612.02            | 174.39             |
| A_68_P20240337 | chr1:55144375-55144419                            | NM_010477:380      | Hspd1      | INSIDE                 | 0.49                                                         | 0.389                          | 2843.83            | 1107.19            | 0.191                          | 2252.86            | 430.11             |
| A_68_P20240346 | chr1:55145446-55145490                            | NM_008303:477      | Hspe1      | INSIDE                 | 0.404                                                        | 10.485                         | 1395.32            | 14629.35           | 4.234                          | 1212.37            | 5133.08            |
| A_68_P23340287 | chr4:137074439-137074483                          | NM_008305:49743    | Hspg2      | INSIDE                 | 0.24                                                         | 12.071                         | 2269.66            | 27398.09           | 2.896                          | 1810.99            | 5244.94            |
| A_68_P23339949 | chr4:137024813-137024857                          | NM_008305:117      | Hspg2      | INSIDE                 | 0.406                                                        | 0.575                          | 2239.64            | 1288.49            | 0.233                          | 1758.02            | 410.41             |
| A_68_P23339947 | chr4:137024556-137024600                          | NM_008305:-139     | Hspg2      | PROMOTER               | 0.56                                                         | 3.391                          | 2396.70            | 8128.03            | 1.898                          | 1868.78            | 3546.50            |
| A_68_P23340288 | chr4:137074524-137074568                          | NM_008305:49829    | Hspg2      | INSIDE                 | 0.125                                                        | 11.251                         | 3055.83            | 34381.26           | 1.412                          | 2251.40            | 3178.98            |
| A_68_P24186280 | chr5:150438607-150438651                          | NM_013559:262      | Hsph1      | INSIDE                 | 0.605                                                        | 0.445                          | 2805.76            | 1248.55            | 0.269                          | 1999.08            | 538.14             |
| A_68_P26674977 | chr9:81526156-81526200                            | NM_010482:-19      | Htr1b      | PROMOTER               | 0.561                                                        | 0.466                          | 1418.38            | 660.48             | 0.261                          | 1057.15            | 276.25             |
| A_68_P23333958 | chr4:135999081-135999125                          | NM_008309:19664    | Htr1d      | INSIDE                 | 0.324                                                        | 7.772                          | 2928.54            | 22759.19           | 2.521                          | 2250.36            | 5672.78            |
| A_68_P23333957 | chr4:135998981-135999032                          | NM_008309:19568    | Htr1d      | INSIDE                 | 0.639                                                        | 5.482                          | 240.30             | 1317.21            | 3.504                          | 187.29             | 656.28             |
| A_68_P30823193 | chr16:65105676-65105720                           | NM_008310:-88      | Htr1f      | PROMOTER               | 0.263                                                        | 13.181                         | 453.51             | 5977.76            | 3.46                           | 371.85             | 1286.73            |
| A_68_P23349533 | chr4:138631065-138631109                          | NM_021358:-382     | Htr6       | PROMOTER               | 0.443                                                        | 4.680                          | 3115.79            | 14581.77           | 2.075                          | 2430.71            | 5044.30            |
| A_68_P23349526 | chr4:138630332-138630376                          | NM_021358:350      | Htr6       | INSIDE                 | 0.618                                                        | 0.387                          | 3999.32            | 1547.42            | 0.239                          | 2661.55            | 636.77             |
| A_68_P23349532 | chr4:138630943-138630988                          | NM_021358:-261     | Htr6       | PROMOTER               | 0.418                                                        | 0.612                          | 3230.53            | 1975.73            | 0.255                          | 2281.27            | 582.52             |
| A_68_P32087899 | chr19:36132232-36132276                           | NM_008315:-404     | Htr7       | PROMOTER               | 0.422                                                        | 6.368                          | 2128.49            | 13554.08           | 2.684                          | 1913.48            | 5136.19            |
| A_68_P32087889 | chr19:36131064-36131112                           | NM_008315:762      | Htr7       | INSIDE                 | 0.532                                                        | 0.527                          | 858.42             | 452.33             | 0.28                           | 624.24             | 175.06             |
| A_68_P30956559 | chr16:90387283-90387327                           | NM_015755:663      | Hunk       | INSIDE                 | 0.46                                                         | 0.233                          | 3352.55            | 779.56             | 0.107                          | 2523.63            | 269.68             |
| A_68_P26809623 | chr9:107471781-107471825                          | NM_010489:309      | Hyal2      | INSIDE                 | 0.506                                                        | 5.159                          | 4467.22            | 23048.09           | 2.613                          | 3746.07            | 9788.24            |
| A_68_P26162181 | chr8:112889462-112889508                          | NM_172916:98608    | Hydin      | INSIDE                 | 0.31                                                         | 5.710                          | 701.32             | 4004.42            | 1.767                          | 522.91             | 924.17             |
| A_68_P28280007 | chr12:21322457-21322501                           | NM_026347:226      | Iah1       | INSIDE                 | 0.479                                                        | 3.366                          | 2887.91            | 9719.69            | 1.611                          | 2406.55            | 3877.25            |
| A_68_P26695696 | chr9:85642551-85642595                            | NM_001081282:369   | Ibtk       | INSIDE                 | 0.427                                                        | 0.281                          | 1787.12            | 503.05             | 0.12                           | 1456.91            | 175.12             |
| A_68_P26695698 | chr9:85642712-85642756                            | NM_001081282:207   | Ibtk       | INSIDE                 | 0.587                                                        | 5.949                          | 621.89             | 3699.55            | 3.492                          | 618.78             | 2160.68            |

| ProbeName      | Target position of probe on CpG island microarray | TargetID          | GeneSymbol | CpG island Description | Ratio of relative methylation (TiO <sub>2</sub> -NP/Vehicle) | Sham group                     |                    |                    | TiO <sub>2</sub> -H group      |                    |                    |
|----------------|---------------------------------------------------|-------------------|------------|------------------------|--------------------------------------------------------------|--------------------------------|--------------------|--------------------|--------------------------------|--------------------|--------------------|
|                |                                                   |                   |            |                        |                                                              | Relative methylation (Cy5/Cy3) | Cy3 signal (Input) | Cy5 signal (MeDIP) | Relative methylation (Cy5/Cy3) | Cy3 signal (Input) | Cy5 signal (MeDIP) |
| A_68_P26345150 | chr9:20836502-20836546                            | NM_008319:43      | Icam5      | INSIDE                 | 0.298                                                        | 13.156                         | 4238.44            | 55762.66           | 3.925                          | 3696.19            | 14506.28           |
| A_68_P26658192 | chr9:77961262-77961306                            | NM_019987:240     | Ick        | INSIDE                 | 0.17                                                         | 40.681                         | 9071.49            | 369035.60          | 6.93                           | 16858.96           | 116833.10          |
| A_68_P26658189 | chr9:77960962-77961006                            | NM_019987:-60     | Ick        | PROMOTER               | 0.557                                                        | 4.250                          | 1134.97            | 4823.69            | 2.369                          | 965.33             | 2286.53            |
| A_68_P26658190 | chr9:77961055-77961099                            | NM_019987:32      | Ick        | INSIDE                 | 0.426                                                        | 0.682                          | 1105.94            | 754.07             | 0.29                           | 887.22             | 257.60             |
| A_68_P27271929 | chr10:77531813-77531858                           | NM_015790:-277    | Icosl      | PROMOTER               | 0.659                                                        | 2.891                          | 1246.98            | 3605.45            | 1.905                          | 1083.22            | 2063.09            |
| A_68_P27271934 | chr10:77532267-77532311                           | NM_015790:176     | Icosl      | INSIDE                 | 0.284                                                        | 0.598                          | 2334.17            | 1394.82            | 0.169                          | 1631.55            | 276.47             |
| A_68_P27271933 | chr10:77532197-77532241                           | NM_015790:106     | Icosl      | INSIDE                 | 0.392                                                        | 1.820                          | 6797.94            | 12371.89           | 0.713                          | 5027.73            | 3582.32            |
| A_68_P21750890 | chr2:152560836-152560880                          | NM_010495:-1151   | Id1        | PROMOTER               | 0.509                                                        | 0.532                          | 2192.45            | 1167.06            | 0.271                          | 1621.39            | 438.98             |
| A_68_P21750891 | chr2:152560945-152560989                          | NM_010495:-1043   | Id1        | PROMOTER               | 0.524                                                        | 0.511                          | 921.79             | 470.72             | 0.268                          | 666.54             | 178.42             |
| A_68_P21750931 | chr2:152565335-152565379                          | NM_010495:3347    | Id1        | DOWNSTREAM             | 0.383                                                        | 1.631                          | 1472.39            | 2401.90            | 0.624                          | 1166.84            | 728.48             |
| A_68_P28293506 | chr12:25781121-25781165                           | NM_010496:-185    | Id2        | PROMOTER               | 0.564                                                        | 3.433                          | 4629.95            | 15895.97           | 1.936                          | 3315.96            | 6420.21            |
| A_68_P28293548 | chr12:25785727-25785771                           | NM_010496:-4791   | Id2        | PROMOTER               | 0.656                                                        | 2.798                          | 2853.81            | 7985.62            | 1.835                          | 2310.39            | 4239.36            |
| A_68_P23332340 | chr4:135704489-135704533                          | NM_008321:4774    | Id3        | DOWNSTREAM             | 0.599                                                        | 0.320                          | 2201.19            | 703.53             | 0.192                          | 1634.58            | 313.05             |
| A_68_P23332312 | chr4:135700753-135700797                          | NM_008321:1038    | Id3        | INSIDE                 | 0.446                                                        | 3.609                          | 2257.86            | 8148.05            | 1.609                          | 2065.82            | 3324.69            |
| A_68_P23332310 | chr4:135700553-135700600                          | NM_008321:840     | Id3        | INSIDE                 | 0.313                                                        | 13.243                         | 200.24             | 2651.70            | 4.14                           | 188.46             | 780.16             |
| A_68_P23332339 | chr4:135704351-135704395                          | NM_008321:4636    | Id3        | DOWNSTREAM             | 0.545                                                        | 2.721                          | 3422.92            | 9314.21            | 1.482                          | 2513.25            | 3724.44            |
| A_68_P29018477 | chr13:48357119-48357169                           | NM_031166:349     | Id4        | INSIDE                 | 0.414                                                        | 0.263                          | 2417.74            | 637.03             | 0.109                          | 1701.23            | 185.59             |
| A_68_P25264893 | chr7:87260180-87260224                            | NM_173011:34      | Idh2       | INSIDE                 | 0.406                                                        | 11.747                         | 891.99             | 10478.05           | 4.774                          | 846.08             | 4039.24            |
| A_68_P25264894 | chr7:87260253-87260297                            | NM_173011:-38     | Idh2       | PROMOTER               | 0.425                                                        | 6.352                          | 700.60             | 4450.26            | 2.697                          | 594.99             | 1604.80            |
| A_68_P25264896 | chr7:87260469-87260513                            | NM_173011:-254    | Idh2       | PROMOTER               | 0.583                                                        | 0.665                          | 1503.69            | 1000.58            | 0.388                          | 1157.43            | 449.10             |
| A_68_P25264890 | chr7:87259796-87259840                            | NM_173011:418     | Idh2       | INSIDE                 | 0.361                                                        | 4.278                          | 6810.67            | 29138.43           | 1.546                          | 5157.58            | 7974.00            |
| A_68_P26526551 | chr9:54434255-54434299                            | NM_029573:-41     | Idh3a      | PROMOTER               | 0.379                                                        | 0.439                          | 3703.96            | 1627.04            | 0.166                          | 2832.09            | 471.14             |
| A_68_P26526552 | chr9:54434359-54434404                            | NM_029573:64      | Idh3a      | INSIDE                 | 0.649                                                        | 0.509                          | 6675.40            | 3397.48            | 0.33                           | 4601.58            | 1519.80            |
| A_68_P26526554 | chr9:54434551-54434595                            | NM_029573:255     | Idh3a      | INSIDE                 | 0.649                                                        | 0.277                          | 2048.76            | 567.74             | 0.18                           | 1613.34            | 290.18             |
| A_68_P26020946 | chr8:87180770-87180814                            | NM_010499:5959    | Ier2       | DOWNSTREAM             | 0.526                                                        | 0.185                          | 2366.67            | 438.80             | 0.097                          | 1758.83            | 171.40             |
| A_68_P20735838 | chr1:156946384-156946428                          | NM_010500:360     | Ier5       | INSIDE                 | 0.594                                                        | 2.825                          | 1332.41            | 3764.42            | 1.678                          | 1438.38            | 2413.00            |
| A_68_P21103442 | chr2:30328841-30328885                            | NM_030244:857     | Ier5l      | INSIDE                 | 0.607                                                        | 23.916                         | 3361.79            | 80399.59           | 14.51                          | 2933.67            | 42566.58           |
| A_68_P21103418 | chr2:30325823-30325867                            | NM_030244:3875    | Ier5l      | DOWNSTREAM             | 0.535                                                        | 0.617                          | 852.42             | 526.04             | 0.33                           | 591.16             | 195.32             |
| A_68_P21103437 | chr2:30328220-30328264                            | NM_030244:1477    | Ier5l      | INSIDE                 | 0.498                                                        | 3.034                          | 1014.83            | 3079.15            | 1.511                          | 1137.59            | 1718.90            |
| A_68_P23352769 | chr4:139130258-139130302                          | NM_001205173:-354 | Iffo2      | PROMOTER               | 0.586                                                        | 0.358                          | 1781.71            | 638.35             | 0.21                           | 1334.49            | 280.28             |
| A_68_P26809753 | chr9:107489861-107489907                          | NM_025903:-164    | Ifrd2      | PROMOTER               | 0.621                                                        | 0.156                          | 3321.26            | 518.12             | 0.097                          | 2147.41            | 208.01             |
| A_68_P21809984 | chr2:162843268-162843312                          | NM_172150:83      | Ift52      | INSIDE                 | 0.66                                                         | 3.471                          | 954.84             | 3314.14            | 2.291                          | 845.26             | 1936.40            |
| A_68_P24051357 | chr5:123064217-123064261                          | NM_009879:289     | Ift81      | INSIDE                 | 0.614                                                        | 3.796                          | 1327.98            | 5041.41            | 2.329                          | 993.80             | 2314.67            |
| A_68_P26585801 | chr9:64949612-64949656                            | NM_020043:333     | Igdcc4     | INSIDE                 | 0.467                                                        | 0.365                          | 1740.16            | 635.33             | 0.17                           | 1366.39            | 232.84             |
| A_68_P26585802 | chr9:64949678-64949722                            | NM_020043:399     | Igdcc4     | INSIDE                 | 0.623                                                        | 2.710                          | 2645.64            | 7169.06            | 1.689                          | 2158.49            | 3646.37            |
| A_68_P28041915 | chr11:95866931-95866976                           | NM_009951:305     | Igf2bp1    | INSIDE                 | 0.238                                                        | 36.239                         | 5007.01            | 181448.10          | 8.64                           | 4839.69            | 41813.43           |
| A_68_P28041918 | chr11:95867212-95867256                           | NM_009951:24      | Igf2bp1    | INSIDE                 | 0.469                                                        | 0.406                          | 1664.35            | 676.14             | 0.19                           | 1233.14            | 234.71             |
| A_68_P28041914 | chr11:95866847-95866891                           | NM_009951:390     | Igf2bp1    | INSIDE                 | 0.508                                                        | 0.469                          | 1627.41            | 762.56             | 0.238                          | 1227.03            | 291.97             |
| A_68_P28041927 | chr11:95868155-95868199                           | NM_009951:-918    | Igf2bp1    | PROMOTER               | 0.555                                                        | 0.542                          | 1344.96            | 728.31             | 0.301                          | 1077.68            | 323.96             |
| A_68_P28041932 | chr11:95868837-95868881                           | NM_009951:-1600   | Igf2bp1    | PROMOTER               | 0.56                                                         | 0.391                          | 3060.47            | 1195.25            | 0.219                          | 2028.11            | 443.83             |
| A_68_P28041910 | chr11:95866408-95866452                           | NM_009951:828     | Igf2bp1    | INSIDE                 | 0.237                                                        | 0.729                          | 1735.24            | 1265.16            | 0.173                          | 1259.26            | 217.90             |
| A_68_P28041933 | chr11:95868905-95868949                           | NM_009951:-1668   | Igf2bp1    | PROMOTER               | 0.372                                                        | 3.881                          | 2748.76            | 10669.31           | 1.446                          | 2109.42            | 3049.75            |
| A_68_P30596432 | chr16:22162719-22162763                           | NM_183029:632     | Igf2bp2    | INSIDE                 | 0.238                                                        | 16.068                         | 1143.71            | 18377.39           | 3.817                          | 948.27             | 3619.91            |
| A_68_P30596436 | chr16:22163233-22163277                           | NM_183029:118     | Igf2bp2    | INSIDE                 | 0.543                                                        | 10.093                         | 941.58             | 9503.77            | 5.483                          | 768.01             | 4211.01            |
| A_68_P24431596 | chr6:49163809-49163853                            | NM_023670:1123    | Igf2bp3    | INSIDE                 | 0.495                                                        | 0.342                          | 2254.13            | 771.90             | 0.169                          | 1602.58            | 271.56             |
| A_68_P24431605 | chr6:49164853-49164897                            | NM_023670:79      | Igf2bp3    | INSIDE                 | 0.64                                                         | 2.446                          | 1200.20            | 2935.23            | 1.564                          | 904.04             | 1413.99            |

| ProbeName      | Target position of probe on CpG island microarray | TargetID           | GeneSymbol | CpG island Description | Ratio of relative methylation (TiO <sub>2</sub> -NP/Vehicle) | Sham group                     |                    |                    | TiO <sub>2</sub> -H group      |                    |                    |
|----------------|---------------------------------------------------|--------------------|------------|------------------------|--------------------------------------------------------------|--------------------------------|--------------------|--------------------|--------------------------------|--------------------|--------------------|
|                |                                                   |                    |            |                        |                                                              | Relative methylation (Cy5/Cy3) | Cy3 signal (Input) | Cy5 signal (MeDIP) | Relative methylation (Cy5/Cy3) | Cy3 signal (Input) | Cy5 signal (MeDIP) |
| A_68_P31053794 | chr17:12962250-12962294                           | NM_010515:300      | Igf2r      | INSIDE                 | 0.571                                                        | 2.806                          | 909.27             | 2551.70            | 1.603                          | 737.76             | 1182.40            |
| A_68_P20339424 | chr1:72920224-72920268                            | NM_010518:1193     | Igf2bp5    | INSIDE                 | 0.494                                                        | 0.539                          | 837.59             | 451.40             | 0.266                          | 663.31             | 176.54             |
| A_68_P25082512 | chr7:50721931-50721975                            | NM_001164518:23441 | Igfbp5     | DOWNSTREAM             | 0.315                                                        | 13.920                         | 1621.44            | 22570.20           | 4.381                          | 1661.34            | 7277.54            |
| A_68_P25082509 | chr7:50721683-50721727                            | NM_001164518:23689 | Igfbp5     | DOWNSTREAM             | 0.422                                                        | 0.347                          | 1566.64            | 543.24             | 0.146                          | 1157.36            | 169.51             |
| A_68_P23356005 | chr4:139665180-139665224                          | NM_198610:137524   | Igfbp5     | INSIDE                 | 0.512                                                        | 0.487                          | 1416.44            | 689.49             | 0.249                          | 1136.35            | 283.18             |
| A_68_P22375206 | chr3:101254965-101255009                          | NM_207205:73939    | Igfbp5     | INSIDE                 | 0.246                                                        | 7.953                          | 1208.33            | 9609.83            | 1.957                          | 922.74             | 1805.43            |
| A_68_P22375207 | chr3:101255068-101255112                          | NM_207205:74043    | Igfbp5     | INSIDE                 | 0.65                                                         | 2.901                          | 1115.46            | 3236.07            | 1.886                          | 926.56             | 1747.79            |
| A_68_P20832289 | chr1:174242640-174242684                          | NM_080419:125      | Igfbp5     | INSIDE                 | 0.631                                                        | 0.392                          | 3689.98            | 1447.67            | 0.247                          | 2802.52            | 693.29             |
| A_68_P20351507 | chr1:74997610-74997654                            | NM_010544:593      | Ihh        | INSIDE                 | 0.478                                                        | 0.690                          | 1656.90            | 1143.72            | 0.33                           | 1282.44            | 423.08             |
| A_68_P20351513 | chr1:74998432-74998476                            | NM_010544:229      | Ihh        | PROMOTER               | 0.351                                                        | 4.578                          | 2899.96            | 13275.51           | 1.607                          | 2471.08            | 3970.40            |
| A_68_P27339938 | chr10:90545771-90545815                           | NM_026166:9        | Ikbip      | INSIDE                 | 0.529                                                        | 3.291                          | 1593.85            | 5245.38            | 1.742                          | 1258.26            | 2191.73            |
| A_68_P27591949 | chr11:11585605-11585649                           | NM_001025597:-589  | Ikzf1      | PROMOTER               | 0.596                                                        | 12.762                         | 351.87             | 4490.46            | 7.602                          | 344.11             | 2615.95            |
| A_68_P27542462 | chr10:128082827-128082871                         | NM_011772:201      | Ikzf4      | INSIDE                 | 0.47                                                         | 13.309                         | 3088.95            | 41110.10           | 6.26                           | 2729.69            | 17086.53           |
| A_68_P25528245 | chr7:138553702-138553746                          | NM_175115:268      | Ikzf5      | INSIDE                 | 0.658                                                        | 0.713                          | 1720.92            | 1227.00            | 0.469                          | 1320.08            | 619.57             |
| A_68_P25954269 | chr8:73340672-73340716                            | NM_008353:8347     | Il12rb1    | INSIDE                 | 0.035                                                        | 5.004                          | 3144.10            | 15733.39           | 0.173                          | 2490.45            | 430.72             |
| A_68_P25954190 | chr8:73328850-73328894                            | NM_008353:-3475    | Il12rb1    | PROMOTER               | 0.652                                                        | 0.603                          | 3195.01            | 1927.03            | 0.393                          | 2412.25            | 948.60             |
| A_68_P32317010 | chrX:33652351-33652395                            | NM_133990:239      | Il13ra1    | INSIDE                 | 0.447                                                        | 3.246                          | 3200.83            | 10389.80           | 1.451                          | 4193.97            | 6084.60            |
| A_68_P29628416 | chr14:58143558-58143602                           | NM_145837:-85      | Il17d      | PROMOTER               | 0.253                                                        | 7.796                          | 1589.63            | 12392.26           | 1.971                          | 1460.23            | 2878.24            |
| A_68_P24798577 | chr6:120413598-120413642                          | NM_008359:406      | Il17ra     | INSIDE                 | 0.482                                                        | 0.314                          | 1932.85            | 606.46             | 0.151                          | 1661.27            | 251.21             |
| A_68_P24759767 | chr6:113432661-113432705                          | NM_134159:11234    | Il17rc     | INSIDE                 | 0.244                                                        | 1.703                          | 1847.65            | 3146.59            | 0.415                          | 1456.32            | 604.52             |
| A_68_P24759766 | chr6:113432543-113432587                          | NM_134159:11116    | Il17rc     | INSIDE                 | 0.429                                                        | 7.578                          | 1851.07            | 14027.48           | 3.253                          | 1872.12            | 6090.91            |
| A_68_P24759668 | chr6:113419933-113419977                          | NM_001034029:11066 | Il17re     | INSIDE                 | 0.589                                                        | 3.547                          | 1494.55            | 5301.10            | 2.088                          | 1306.49            | 2727.72            |
| A_68_P20170470 | chr1:40323556-40323600                            | NM_001123382:148   | Il1r1      | INSIDE                 | 0.207                                                        | 41.897                         | 1157.58            | 48499.53           | 8.68                           | 1507.43            | 13083.92           |
| A_68_P30621546 | chr16:26581967-26582011                           | NM_134103:198      | Il1rap     | INSIDE                 | 0.636                                                        | 5.367                          | 2008.65            | 10780.79           | 3.411                          | 1704.95            | 5816.21            |
| A_68_P30621544 | chr16:26581734-26581778                           | NM_134103:-34      | Il1rap     | PROMOTER               | 0.535                                                        | 0.563                          | 889.14             | 501.00             | 0.301                          | 744.09             | 224.18             |
| A_68_P26017803 | chr8:86566236-86566280                            | NM_016671:216      | Il27ra     | INSIDE                 | 0.646                                                        | 0.470                          | 3994.59            | 1878.06            | 0.304                          | 2955.02            | 897.99             |
| A_68_P25089584 | chr7:52095285-52095329                            | NM_010215:3649     | Il4i1      | INSIDE                 | 0.614                                                        | 4.420                          | 1944.00            | 8593.42            | 2.713                          | 1535.92            | 4167.13            |
| A_68_P25495415 | chr7:132725071-132725115                          | NM_001008700:29297 | Il4ra      | DOWNSTREAM             | 0.428                                                        | 6.849                          | 3961.94            | 27135.26           | 2.931                          | 3334.80            | 9775.35            |
| A_68_P25495193 | chr7:132695650-132695696                          | NM_001008700:-123  | Il4ra      | PROMOTER               | 0.639                                                        | 0.132                          | 4626.35            | 610.06             | 0.084                          | 3153.96            | 265.87             |
| A_68_P22322383 | chr3:89716803-89716848                            | NM_010559:259      | Il6ra      | INSIDE                 | 0.241                                                        | 1.884                          | 1240.42            | 2337.20            | 0.454                          | 979.48             | 444.97             |
| A_68_P29334871 | chr13:113254322-113254366                         | NM_010560:67       | Il6st      | INSIDE                 | 0.235                                                        | 17.455                         | 3215.98            | 56135.71           | 4.094                          | 2685.55            | 10994.51           |
| A_68_P29334874 | chr13:113254711-113254755                         | NM_010560:455      | Il6st      | INSIDE                 | 0.642                                                        | 0.329                          | 1513.02            | 497.06             | 0.211                          | 1155.11            | 243.72             |
| A_68_P30676660 | chr16:36694130-36694174                           | NM_134109:29       | Il6r1      | INSIDE                 | 0.391                                                        | 0.296                          | 1709.33            | 506.13             | 0.116                          | 1497.35            | 173.31             |
| A_68_P26346744 | chr9:21172242-21172286                            | NM_001042708:-182  | Ilf3       | PROMOTER               | 0.608                                                        | 0.520                          | 1557.47            | 809.84             | 0.316                          | 1271.68            | 401.86             |
| A_68_P27274853 | chr10:78037676-78037720                           | NM_173751:454      | Ilvbl      | INSIDE                 | 0.417                                                        | 0.622                          | 3936.86            | 2447.17            | 0.259                          | 2783.18            | 721.47             |
| A_68_P27274847 | chr10:78037023-78037067                           | NM_173751:-200     | Ilvbl      | PROMOTER               | 0.316                                                        | 1.564                          | 1428.58            | 2234.13            | 0.494                          | 1141.12            | 563.58             |
| A_68_P28382007 | chr12:41750810-41750854                           | NM_053122:156      | Immnp2l    | INSIDE                 | 0.662                                                        | 0.446                          | 2327.54            | 1038.51            | 0.296                          | 1836.58            | 542.83             |
| A_68_P31791019 | chr18:67449170-67449214                           | NM_053261:316      | Impa2      | INSIDE                 | 0.326                                                        | 0.243                          | 7053.67            | 1714.70            | 0.079                          | 4672.54            | 370.16             |
| A_68_P31791020 | chr18:67449254-67449298                           | NM_053261:400      | Impa2      | INSIDE                 | 0.349                                                        | 0.240                          | 4473.25            | 1075.64            | 0.084                          | 2739.69            | 229.72             |
| A_68_P31791016 | chr18:67448771-67448815                           | NM_053261:-84      | Impa2      | PROMOTER               | 0.309                                                        | 5.012                          | 20624.26           | 103364.90          | 1.551                          | 13635.60           | 21147.84           |
| A_68_P22698893 | chr4:4719656-4719700                              | NM_177730:775      | Impad1     | INSIDE                 | 0.572                                                        | 0.540                          | 3177.34            | 1715.82            | 0.309                          | 2435.65            | 751.73             |
| A_68_P24325256 | chr6:29166419-29166463                            | NM_011829:-4169    | Impdh1     | PROMOTER               | 0.429                                                        | 0.212                          | 2614.27            | 554.58             | 0.091                          | 1928.67            | 175.62             |
| A_68_P24325225 | chr6:29162476-29162520                            | NM_011829:-227     | Impdh1     | PROMOTER               | 0.556                                                        | 0.372                          | 2683.66            | 999.52             | 0.207                          | 1745.27            | 361.59             |
| A_68_P28751168 | chr12:113838436-113838480                         | NM_198411:11464    | Inf2       | INSIDE                 | 0.359                                                        | 7.364                          | 1328.70            | 9784.61            | 2.64                           | 1204.17            | 3179.19            |
| A_68_P25656232 | chr8:11558421-11558465                            | NM_011919:2377     | Ing1       | INSIDE                 | 0.467                                                        | 0.425                          | 1461.32            | 620.90             | 0.199                          | 1260.25            | 250.19             |
| A_68_P25656224 | chr8:11557705-11557749                            | NM_011919:1661     | Ing1       | INSIDE                 | 0.473                                                        | 9.078                          | 2896.25            | 26292.38           | 4.297                          | 2428.61            | 10435.22           |

| ProbeName      | Target position of probe on CpG island microarray | TargetID          | GeneSymbol | CpG island Description | Ratio of relative methylation (TiO <sub>2</sub> -NP/Vehicle) | Sham group                     |                    |                    | TiO <sub>2</sub> -H group      |                    |                    |
|----------------|---------------------------------------------------|-------------------|------------|------------------------|--------------------------------------------------------------|--------------------------------|--------------------|--------------------|--------------------------------|--------------------|--------------------|
|                |                                                   |                   |            |                        |                                                              | Relative methylation (Cy5/Cy3) | Cy3 signal (Input) | Cy5 signal (MeDIP) | Relative methylation (Cy5/Cy3) | Cy3 signal (Input) | Cy5 signal (MeDIP) |
| A_68_P25656230 | chr8:11558245-11558289                            | NM_011919:2201    | Ing1       | INSIDE                 | 0.478                                                        | 0.204                          | 3020.02            | 616.19             | 0.098                          | 2361.76            | 230.49             |
| A_68_P25656226 | chr8:11557934-11557978                            | NM_011919:1891    | Ing1       | INSIDE                 | 0.648                                                        | 0.546                          | 1033.64            | 564.85             | 0.354                          | 897.42             | 317.67             |
| A_68_P25656210 | chr8:11555759-11555803                            | NM_011919:-285    | Ing1       | DIVERGENT_PROMOTER     | 0.477                                                        | 1.373                          | 9017.62            | 12381.28           | 0.655                          | 5590.31            | 3659.65            |
| A_68_P25842937 | chr8:48759109-48759153                            | NM_023503:1383    | Ing2       | INSIDE                 | 0.278                                                        | 11.244                         | 11000.72           | 123695.80          | 3.125                          | 10972.11           | 34283.09           |
| A_68_P25842954 | chr8:48761152-48761196                            | NM_023503:-661    | Ing2       | PROMOTER               | 0.354                                                        | 8.314                          | 724.93             | 6026.78            | 2.945                          | 668.79             | 1969.30            |
| A_68_P25842947 | chr8:48760467-48760511                            | NM_023503:25      | Ing2       | INSIDE                 | 0.41                                                         | 0.513                          | 956.23             | 490.19             | 0.21                           | 833.48             | 175.16             |
| A_68_P25842949 | chr8:48760597-48760641                            | NM_023503:-105    | Ing2       | PROMOTER               | 0.566                                                        | 4.366                          | 2121.54            | 9262.43            | 2.471                          | 1828.02            | 4517.60            |
| A_68_P24288408 | chr6:21900000-21900044                            | NM_023626:408     | Ing3       | INSIDE                 | 0.42                                                         | 7.093                          | 5371.62            | 38101.50           | 2.976                          | 4782.62            | 14232.34           |
| A_68_P20457532 | chr1:95700895-95700939                            | NM_025454:375     | Ing5       | INSIDE                 | 0.571                                                        | 14.238                         | 2220.37            | 31613.45           | 8.127                          | 2131.13            | 17319.50           |
| A_68_P20457529 | chr1:95700443-95700487                            | NM_025454:-77     | Ing5       | DIVERGENT_PROMOTER     | 0.61                                                         | 19.804                         | 2725.91            | 53983.97           | 12.09                          | 3606.40            | 43599.99           |
| A_68_P20457526 | chr1:95700053-95700097                            | NM_025454:-467    | Ing5       | DIVERGENT_PROMOTER     | 0.663                                                        | 4.810                          | 1220.12            | 5868.39            | 3.189                          | 1009.03            | 3217.41            |
| A_68_P20556969 | chr1:121317983-121318027                          | NM_008381:821     | Inhbb      | INSIDE                 | 0.107                                                        | 41.670                         | 1872.06            | 78007.86           | 4.476                          | 1721.12            | 7703.15            |
| A_68_P20556967 | chr1:121317480-121317524                          | NM_008381:1323    | Inhbb      | INSIDE                 | 0.275                                                        | 27.802                         | 1256.28            | 34926.84           | 7.659                          | 1256.92            | 9627.07            |
| A_68_P20556963 | chr1:121316999-121317043                          | NM_008381:1805    | Inhbb      | INSIDE                 | 0.549                                                        | 0.566                          | 1350.37            | 764.25             | 0.311                          | 1091.12            | 338.81             |
| A_68_P21569910 | chr2:119303067-119303111                          | NM_026574:277     | Ino80      | INSIDE                 | 0.279                                                        | 21.684                         | 4438.93            | 96253.65           | 6.044                          | 3950.27            | 23876.86           |
| A_68_P21569912 | chr2:119303420-119303464                          | NM_026574:-77     | Ino80      | PROMOTER               | 0.624                                                        | 0.142                          | 4321.30            | 611.75             | 0.088                          | 2933.78            | 259.28             |
| A_68_P31558687 | chr18:24280026-24280070                           | NM_172625:272     | Ino80c     | INSIDE                 | 0.162                                                        | 9.425                          | 3130.67            | 29506.96           | 1.527                          | 2895.10            | 4421.16            |
| A_68_P20285212 | chr1:63160117-63160161                            | NM_001081436:703  | Ino80d     | INSIDE                 | 0.443                                                        | 0.471                          | 983.83             | 463.57             | 0.209                          | 824.08             | 172.20             |
| A_68_P20285216 | chr1:63160901-63160945                            | NM_001081436:-81  | Ino80d     | PROMOTER               | 0.462                                                        | 4.591                          | 1508.33            | 6925.12            | 2.12                           | 1331.07            | 2821.57            |
| A_68_P20229131 | chr1:52874158-52874202                            | NM_008384:352     | Inpp1      | INSIDE                 | 0.443                                                        | 0.570                          | 2852.41            | 1624.61            | 0.253                          | 2027.86            | 512.04             |
| A_68_P20229132 | chr1:52874292-52874338                            | NM_008384:218     | Inpp1      | INSIDE                 | 0.614                                                        | 2.479                          | 1883.64            | 4669.43            | 1.522                          | 1555.88            | 2367.69            |
| A_68_P20153136 | chr1:37357143-37357187                            | NM_030266:427     | Inpp4a     | INSIDE                 | 0.639                                                        | 0.639                          | 1224.87            | 783.17             | 0.409                          | 958.56             | 391.58             |
| A_68_P25577541 | chr7:146574687-146574731                          | NM_001127363:-299 | Inpp5a     | PROMOTER               | 0.351                                                        | 0.260                          | 5312.41            | 1379.76            | 0.091                          | 3808.95            | 347.66             |
| A_68_P23270092 | chr4:124428943-124428987                          | NM_008385:9843    | Inpp5b     | INSIDE                 | 0.323                                                        | 0.616                          | 6449.98            | 3970.22            | 0.199                          | 4622.63            | 918.80             |
| A_68_P21078497 | chr2:26264502-26264546                            | NM_033134:184     | Inpp5e     | INSIDE                 | 0.457                                                        | 4.112                          | 1057.70            | 4349.29            | 1.881                          | 902.36             | 1697.09            |
| A_68_P25512009 | chr7:135831848-135831892                          | NM_178641:76992   | Inpp5f     | INSIDE                 | 0.554                                                        | 2.775                          | 1826.23            | 5068.24            | 1.537                          | 1497.98            | 2301.92            |
| A_68_P25375722 | chr7:108985190-108985234                          | NM_001122739:1126 | Inpp11     | INSIDE                 | 0.565                                                        | 3.131                          | 1994.81            | 6246.43            | 1.769                          | 1677.64            | 2967.99            |
| A_68_P25375721 | chr7:108985015-108985059                          | NM_001122739:1302 | Inpp11     | INSIDE                 | 0.6                                                          | 0.554                          | 4797.81            | 2659.12            | 0.333                          | 2846.53            | 946.77             |
| A_68_P25375729 | chr7:108986068-108986112                          | NM_001122739:248  | Inpp11     | INSIDE                 | 0.604                                                        | 0.338                          | 5847.50            | 1975.62            | 0.204                          | 3893.45            | 795.06             |
| A_68_P23560503 | chr5:28397698-28397742                            | NM_153526:-231    | Insig1     | PROMOTER               | 0.663                                                        | 3.833                          | 888.29             | 3404.66            | 2.542                          | 720.32             | 1831.25            |
| A_68_P20566310 | chr1:123224253-123224297                          | NM_133748:65      | Insig2     | INSIDE                 | 0.38                                                         | 1.368                          | 3542.34            | 4844.79            | 0.52                           | 2743.57            | 1426.11            |
| A_68_P25958332 | chr8:74213234-74213278                            | NM_013564:106     | Ins3       | INSIDE                 | 0.654                                                        | 3.629                          | 521.54             | 1892.79            | 2.373                          | 451.43             | 1071.42            |
| A_68_P21717098 | chr2:146047771-146047815                          | NM_016889:60      | Insm1      | INSIDE                 | 0.165                                                        | 13.395                         | 1053.78            | 14115.07           | 2.213                          | 976.69             | 2161.45            |
| A_68_P21717097 | chr2:146047662-146047707                          | NM_016889:-48     | Insm1      | PROMOTER               | 0.509                                                        | 3.387                          | 1926.61            | 6524.97            | 1.723                          | 1753.67            | 3021.36            |
| A_68_P28452657 | chr12:56700590-56700634                           | NM_020287:709     | Insm2      | INSIDE                 | 0.521                                                        | 14.282                         | 1195.61            | 17075.86           | 7.441                          | 1080.33            | 8038.87            |
| A_68_P28452665 | chr12:56701584-56701628                           | NM_020287:1703    | Insm2      | INSIDE                 | 0.559                                                        | 0.476                          | 1111.46            | 528.88             | 0.266                          | 981.43             | 261.14             |
| A_68_P28452664 | chr12:56701514-56701558                           | NM_020287:1633    | Insm2      | INSIDE                 | 0.59                                                         | 0.332                          | 1411.45            | 468.18             | 0.196                          | 997.24             | 195.03             |
| A_68_P28452663 | chr12:56701421-56701465                           | NM_020287:1539    | Insm2      | INSIDE                 | 0.391                                                        | 3.882                          | 2430.24            | 9433.13            | 1.517                          | 2039.70            | 3093.58            |
| A_68_P22310075 | chr3:87600813-87600858                            | NM_011832:-37     | Insr       | DIVERGENT_PROMOTER     | 0.207                                                        | 23.052                         | 3449.55            | 79519.62           | 4.773                          | 3917.19            | 18697.95           |
| A_68_P22310076 | chr3:87600886-87600930                            | NM_011832:36      | Insr       | INSIDE                 | 0.353                                                        | 0.637                          | 2015.51            | 1283.07            | 0.225                          | 1616.44            | 363.56             |
| A_68_P20938882 | chr1:193399613-193399657                          | NM_178632:22      | Ints7      | INSIDE                 | 0.577                                                        | 0.267                          | 1736.12            | 462.97             | 0.154                          | 1134.88            | 174.70             |
| A_68_P26812405 | chr9:107905152-107905196                          | NM_013785:196     | Ip6k1      | INSIDE                 | 0.38                                                         | 7.425                          | 1003.94            | 7453.83            | 2.823                          | 916.59             | 2587.36            |
| A_68_P27234953 | chr10:70810954-70810998                           | NM_027184:436     | Ipmk       | INSIDE                 | 0.342                                                        | 0.443                          | 3195.92            | 1414.56            | 0.151                          | 2274.36            | 343.92             |
| A_68_P29952571 | chr14:121309972-121310016                         | NM_023579:-421    | Ipo5       | PROMOTER               | 0.649                                                        | 3.538                          | 1798.95            | 6365.45            | 2.296                          | 1661.44            | 3814.40            |
| A_68_P20639342 | chr1:137326653-137326697                          | NM_153774:394     | Ipo9       | INSIDE                 | 0.208                                                        | 1.731                          | 8171.43            | 14147.53           | 0.36                           | 5225.48            | 1883.26            |
| A_68_P20639343 | chr1:137326748-137326792                          | NM_153774:298     | Ipo9       | INSIDE                 | 0.62                                                         | 0.209                          | 5870.25            | 1225.02            | 0.129                          | 4153.60            | 537.32             |

| ProbeName      | Target position of probe on CpG island microarray | TargetID           | GeneSymbol | CpG island Description | Ratio of relative methylation (TiO <sub>2</sub> -NP/Vehicle) | Sham group                     |                    |                    | TiO <sub>2</sub> -H group      |                    |                    |
|----------------|---------------------------------------------------|--------------------|------------|------------------------|--------------------------------------------------------------|--------------------------------|--------------------|--------------------|--------------------------------|--------------------|--------------------|
|                |                                                   |                    |            |                        |                                                              | Relative methylation (Cy5/Cy3) | Cy3 signal (Input) | Cy5 signal (MeDIP) | Relative methylation (Cy5/Cy3) | Cy3 signal (Input) | Cy5 signal (MeDIP) |
| A_68_P23297597 | chr4:129296176-129296220                          | NM_198026:139      | Iqcc       | INSIDE                 | 0.418                                                        | 0.219                          | 2721.88            | 596.95             | 0.092                          | 1849.92            | 169.76             |
| A_68_P24142813 | chr5:141177968-141178012                          | NM_028833:342      | Iqcc       | INSIDE                 | 0.406                                                        | 0.372                          | 1740.77            | 647.72             | 0.151                          | 1408.17            | 212.94             |
| A_68_P24142816 | chr5:141178207-141178251                          | NM_028833:104      | Iqcc       | INSIDE                 | 0.591                                                        | 3.718                          | 924.54             | 3437.70            | 2.197                          | 727.76             | 1598.83            |
| A_68_P24142814 | chr5:141178050-141178094                          | NM_028833:260      | Iqcc       | INSIDE                 | 0.633                                                        | 0.178                          | 3165.61            | 563.89             | 0.113                          | 2205.24            | 248.58             |
| A_68_P25460625 | chr7:125999193-125999237                          | NM_001081446:-74   | Iqck       | DIVERGENT_PROMOTER     | 0.341                                                        | 5.817                          | 2678.66            | 15581.81           | 1.983                          | 2329.61            | 4620.53            |
| A_68_P25268780 | chr7:87947830-87947874                            | NM_016721:365      | Iqgap1     | INSIDE                 | 0.483                                                        | 3.201                          | 2043.16            | 6540.89            | 1.547                          | 1650.86            | 2553.95            |
| A_68_P29243355 | chr13:96661950-96661994                           | NM_027711:-95      | Iqgap2     | PROMOTER               | 0.264                                                        | 27.287                         | 3759.45            | 102583.80          | 7.214                          | 3596.67            | 25947.03           |
| A_68_P24634427 | chr6:90686065-90686109                            | NM_001134384:74031 | Iqsec1     | INSIDE                 | 0.466                                                        | 0.364                          | 2031.02            | 739.08             | 0.17                           | 1518.11            | 257.68             |
| A_68_P24804132 | chr6:121363263-121363307                          | NM_001033354:60412 | Iqsec3     | INSIDE                 | 0.377                                                        | 4.656                          | 1327.55            | 6181.45            | 1.757                          | 1115.25            | 1959.63            |
| A_68_P24804559 | chr6:121423187-121423231                          | NM_001033354:488   | Iqsec3     | INSIDE                 | 0.666                                                        | 2.929                          | 686.18             | 2009.53            | 1.952                          | 628.57             | 1226.79            |
| A_68_P26680223 | chr9:82723595-82723639                            | NM_001168240:204   | Irak1bp1   | INSIDE                 | 0.421                                                        | 0.528                          | 886.85             | 467.89             | 0.222                          | 779.23             | 172.88             |
| A_68_P27495833 | chr10:119638332-119638376                         | NM_028679:239      | Irak3      | INSIDE                 | 0.596                                                        | 0.389                          | 1228.30            | 477.30             | 0.232                          | 971.88             | 225.24             |
| A_68_P30452934 | chr15:94374073-94374117                           | NM_029926:4        | Irak4      | INSIDE                 | 0.417                                                        | 3.858                          | 1290.72            | 4979.19            | 1.609                          | 1150.77            | 1851.71            |
| A_68_P25837693 | chr8:47826718-47826762                            | NM_008391:1642     | Irf2       | INSIDE                 | 0.604                                                        | 5.897                          | 405.22             | 2389.66            | 3.561                          | 351.73             | 1252.47            |
| A_68_P24990858 | chr7:19589997-19590041                            | NM_178757:605      | Irf2bp1    | INSIDE                 | 0.544                                                        | 0.554                          | 4609.76            | 2553.78            | 0.301                          | 3409.84            | 1026.83            |
| A_68_P24990862 | chr7:19590451-19590495                            | NM_178757:1059     | Irf2bp1    | INSIDE                 | 0.609                                                        | 0.501                          | 2079.31            | 1040.97            | 0.305                          | 1420.36            | 433.39             |
| A_68_P24990865 | chr7:19590861-19590905                            | NM_178757:1469     | Irf2bp1    | INSIDE                 | 0.643                                                        | 3.396                          | 1532.94            | 5205.87            | 2.183                          | 1355.98            | 2960.64            |
| A_68_P26258433 | chr8:129118351-129118402                          | NM_001164598:-1040 | Irf2bp2    | PROMOTER               | 0.339                                                        | 11.397                         | 1627.24            | 18545.09           | 3.865                          | 1622.28            | 6270.18            |
| A_68_P26258437 | chr8:129118704-129118748                          | NM_001164598:-1390 | Irf2bp2    | PROMOTER               | 0.382                                                        | 0.564                          | 922.41             | 519.87             | 0.215                          | 808.29             | 173.93             |
| A_68_P26258415 | chr8:129116306-129116350                          | NM_001164598:1008  | Irf2bp2    | INSIDE                 | 0.244                                                        | 5.997                          | 6570.39            | 39405.48           | 1.464                          | 5191.38            | 7598.11            |
| A_68_P25090529 | chr7:52253176-52253220                            | NM_016849:169      | Irf3       | INSIDE                 | 0.614                                                        | 4.074                          | 1319.91            | 5377.81            | 2.5                            | 1173.69            | 2934.68            |
| A_68_P28918888 | chr13:30842515-30842559                           | NM_013674:1410     | Irf4       | INSIDE                 | 0.408                                                        | 0.323                          | 1970.94            | 636.43             | 0.132                          | 1425.95            | 188.06             |
| A_68_P24327113 | chr6:29477125-29477169                            | NM_012057:414      | Irf5       | INSIDE                 | 0.58                                                         | 10.413                         | 1452.59            | 15125.86           | 6.043                          | 2305.01            | 13928.90           |
| A_68_P25004862 | chr7:25217754-25217798                            | NM_199013:12925    | Irfc1      | INSIDE                 | 0.523                                                        | 3.254                          | 2833.34            | 9219.24            | 1.701                          | 1930.10            | 3283.73            |
| A_68_P25004866 | chr7:25218198-25218242                            | NM_199013:12481    | Irfc1      | INSIDE                 | 0.412                                                        | 3.368                          | 3328.63            | 11210.64           | 1.387                          | 2485.15            | 3447.44            |
| A_68_P25005401 | chr7:25319057-25319101                            | NM_153134:3412     | Irgq       | INSIDE                 | 0.351                                                        | 20.526                         | 1074.41            | 22052.98           | 7.199                          | 856.23             | 6164.20            |
| A_68_P25005396 | chr7:25318615-25318659                            | NM_153134:2970     | Irgq       | INSIDE                 | 0.607                                                        | 3.770                          | 3005.50            | 11330.11           | 2.288                          | 2155.49            | 4931.92            |
| A_68_P25005400 | chr7:25318962-25319006                            | NM_153134:3318     | Irgq       | INSIDE                 | 0.628                                                        | 4.003                          | 2042.00            | 8173.99            | 2.515                          | 1680.68            | 4226.88            |
| A_68_P25005399 | chr7:25318886-25318930                            | NM_153134:3242     | Irgq       | INSIDE                 | 0.479                                                        | 1.356                          | 2843.81            | 3857.23            | 0.649                          | 2134.11            | 1385.39            |
| A_68_P20391718 | chr1:82287606-82287650                            | NM_010570:386      | Irs1       | INSIDE                 | 0.371                                                        | 11.600                         | 2884.61            | 33460.27           | 4.309                          | 2642.31            | 11385.69           |
| A_68_P20391723 | chr1:82288408-82288452                            | NM_010570:-416     | Irs1       | PROMOTER               | 0.582                                                        | 0.359                          | 1614.42            | 579.61             | 0.209                          | 1163.49            | 242.97             |
| A_68_P25652455 | chr8:11009184-11009228                            | NM_001081212:-776  | Irs2       | PROMOTER               | 0.475                                                        | 4.612                          | 2100.96            | 9689.31            | 2.192                          | 1716.80            | 3762.79            |
| A_68_P25652449 | chr8:11008424-11008468                            | NM_001081212:-16   | Irs2       | PROMOTER               | 0.553                                                        | 7.070                          | 1197.25            | 8464.67            | 3.91                           | 1076.38            | 4208.25            |
| A_68_P32704868 | chrX:138159961-138160005                          | NM_010572:-222     | Irs4       | PROMOTER               | 0.289                                                        | 5.875                          | 951.64             | 5591.31            | 1.697                          | 1179.34            | 2001.84            |
| A_68_P29130726 | chr13:72101391-72101435                           | NM_010573:-241     | Irx1       | PROMOTER               | 0.374                                                        | 6.857                          | 1193.72            | 8185.37            | 2.567                          | 978.90             | 2512.86            |
| A_68_P29134822 | chr13:72768633-72768679                           | NM_010574:2231     | Irx2       | INSIDE                 | 0.232                                                        | 7.335                          | 5009.05            | 36743.20           | 1.703                          | 3838.90            | 6536.18            |
| A_68_P29134821 | chr13:72768527-72768571                           | NM_010574:2123     | Irx2       | INSIDE                 | 0.425                                                        | 0.581                          | 1135.07            | 659.37             | 0.247                          | 855.80             | 211.16             |
| A_68_P26061528 | chr8:94324564-94324608                            | NM_008393:687      | Irx3       | INSIDE                 | 0.552                                                        | 0.465                          | 1669.40            | 776.24             | 0.257                          | 1170.76            | 300.65             |
| A_68_P26061524 | chr8:94323959-94324003                            | NM_008393:1293     | Irx3       | INSIDE                 | 0.57                                                         | 0.574                          | 6760.10            | 3882.27            | 0.327                          | 5042.84            | 1651.06            |
| A_68_P26061503 | chr8:94321755-94321804                            | NM_008393:3494     | Irx3       | DOWNSTREAM             | 0.391                                                        | 0.632                          | 925.26             | 584.72             | 0.247                          | 712.56             | 176.28             |
| A_68_P29138629 | chr13:73397900-73397944                           | NM_018885:-22      | Irx4       | PROMOTER               | 0.583                                                        | 3.681                          | 1710.04            | 6294.18            | 2.145                          | 1482.96            | 3181.08            |
| A_68_P26065137 | chr8:94881817-94881861                            | NM_018826:144      | Irx5       | INSIDE                 | 0.202                                                        | 13.254                         | 1519.77            | 20143.64           | 2.683                          | 1299.29            | 3486.08            |
| A_68_P26065139 | chr8:94882073-94882117                            | NM_018826:400      | Irx5       | INSIDE                 | 0.329                                                        | 0.387                          | 1801.93            | 697.17             | 0.127                          | 1373.92            | 174.78             |
| A_68_P26065141 | chr8:94882239-94882283                            | NM_018826:566      | Irx5       | INSIDE                 | 0.488                                                        | 2.870                          | 2523.37            | 7241.93            | 1.4                            | 2041.46            | 2858.11            |
| A_68_P23999970 | chr5:114222262-114222309                          | NM_025526:-535     | Iscu       | DIVERGENT_PROMOTER     | 0.211                                                        | 12.075                         | 212.47             | 2565.44            | 2.543                          | 242.02             | 615.41             |
| A_68_P22310778 | chr3:87734179-87734223                            | NM_177663:-35      | Isg20l2    | DIVERGENT_PROMOTER     | 0.181                                                        | 1.781                          | 2925.96            | 5210.95            | 0.322                          | 2314.48            | 744.59             |

| ProbeName      | Target position of probe on CpG island microarray | TargetID            | GeneSymbol | CpG island Description | Ratio of relative methylation (TiO <sub>2</sub> -NP/Vehicle) | Sham group                     |                    |                    | TiO <sub>2</sub> -H group      |                    |                    |
|----------------|---------------------------------------------------|---------------------|------------|------------------------|--------------------------------------------------------------|--------------------------------|--------------------|--------------------|--------------------------------|--------------------|--------------------|
|                |                                                   |                     |            |                        |                                                              | Relative methylation (Cy5/Cy3) | Cy3 signal (Input) | Cy5 signal (MeDIP) | Relative methylation (Cy5/Cy3) | Cy3 signal (Input) | Cy5 signal (MeDIP) |
| A_68_P26531872 | chr9:55390256-55390300                            | NM_027397:1323      | Isl2       | INSIDE                 | 0.414                                                        | 10.579                         | 1217.45            | 12878.94           | 4.378                          | 938.91             | 4111.01            |
| A_68_P26531904 | chr9:55394018-55394062                            | NM_027397:5085      | Isl2       | DOWNSTREAM             | 0.462                                                        | 0.326                          | 1560.43            | 508.95             | 0.151                          | 1311.11            | 197.69             |
| A_68_P26546334 | chr9:58046265-58046309                            | NM_001161535:3236   | Islr2      | INSIDE                 | 0.392                                                        | 0.539                          | 2556.06            | 1378.13            | 0.211                          | 1918.58            | 405.69             |
| A_68_P21680294 | chr2:139504121-139504165                          | NM_001126490:229    | Ism1       | INSIDE                 | 0.55                                                         | 3.557                          | 796.59             | 2833.82            | 1.957                          | 784.35             | 1534.93            |
| A_68_P31743422 | chr18:58818798-58818854                           | NM_025478:-309      | Isoc1      | PROMOTER               | 0.489                                                        | 5.284                          | 329.92             | 1743.31            | 2.582                          | 277.99             | 717.66             |
| A_68_P24618420 | chr6:87788600-87788644                            | NM_133934:131       | Istyl      | INSIDE                 | 0.251                                                        | 7.685                          | 1328.59            | 10210.09           | 1.926                          | 1095.98            | 2111.30            |
| A_68_P25952868 | chr8:73118866-73118910                            | NM_023627:509       | Isyna1     | INSIDE                 | 0.245                                                        | 1.790                          | 1883.37            | 3371.17            | 0.438                          | 1427.14            | 624.72             |
| A_68_P25952861 | chr8:73118130-73118174                            | NM_023627:-227      | Isyna1     | PROMOTER               | 0.455                                                        | 4.194                          | 3472.61            | 14565.09           | 1.91                           | 3053.17            | 5832.41            |
| A_68_P25952869 | chr8:73118953-73118997                            | NM_023627:595       | Isyna1     | INSIDE                 | 0.561                                                        | 3.350                          | 2214.30            | 7417.17            | 1.88                           | 1815.32            | 3413.70            |
| A_68_P25952871 | chr8:73119135-73119179                            | NM_023627:777       | Isyna1     | INSIDE                 | 0.201                                                        | 1.608                          | 2058.67            | 3310.71            | 0.324                          | 1429.51            | 463.17             |
| A_68_P28079748 | chr11:102328467-102328511                         | NM_010575:2709      | Itga2b     | INSIDE                 | 0.647                                                        | 0.627                          | 2262.61            | 1419.22            | 0.406                          | 1638.68            | 664.68             |
| A_68_P28036505 | chr11:94937282-94937326                           | NM_013565:724       | Itga3      | INSIDE                 | 0.596                                                        | 0.558                          | 1412.04            | 787.76             | 0.333                          | 1060.31            | 352.82             |
| A_68_P21367543 | chr2:79095483-79095527                            | NM_010576:-78       | Itga4      | PROMOTER               | 0.117                                                        | 21.370                         | 2289.27            | 48921.29           | 2.49                           | 1909.88            | 4755.31            |
| A_68_P30503777 | chr15:103196605-103196649                         | NM_010577:553       | Itga5      | INSIDE                 | 0.655                                                        | 0.605                          | 1535.75            | 928.68             | 0.396                          | 1311.19            | 519.71             |
| A_68_P27543981 | chr10:128370721-128370765                         | NM_008398:-126      | Itga7      | PROMOTER               | 0.621                                                        | 0.455                          | 1960.48            | 892.28             | 0.283                          | 1642.02            | 464.24             |
| A_68_P21010259 | chr2:12223211-12223256                            | NM_001001309:314    | Itga8      | INSIDE                 | 0.617                                                        | 0.568                          | 1489.17            | 845.50             | 0.35                           | 1228.66            | 430.17             |
| A_68_P21010261 | chr2:12223501-12223545                            | NM_001001309:25     | Itga8      | INSIDE                 | 0.613                                                        | 0.530                          | 1051.83            | 556.96             | 0.324                          | 963.76             | 312.73             |
| A_68_P26867372 | chr9:118515925-118515969                          | NM_133721:120       | Itga9      | INSIDE                 | 0.523                                                        | 6.368                          | 405.58             | 2582.90            | 3.328                          | 373.62             | 1243.27            |
| A_68_P21389130 | chr2:83564617-83564661                            | NM_008402:85        | Itgav      | INSIDE                 | 0.503                                                        | 4.261                          | 1384.64            | 5900.57            | 2.142                          | 1083.81            | 2322.01            |
| A_68_P26270752 | chr8:131210063-131210107                          | NM_010578:531       | Itgb1      | INSIDE                 | 0.582                                                        | 0.498                          | 2472.70            | 1231.91            | 0.29                           | 1927.34            | 558.79             |
| A_68_P28156775 | chr11:115866293-115866337                         | NM_001005608:30276  | Itgb4      | INSIDE                 | 0.665                                                        | 5.231                          | 1294.88            | 6773.39            | 3.479                          | 1080.66            | 3759.61            |
| A_68_P28156587 | chr11:115836535-115836579                         | NM_001005608:518    | Itgb4      | INSIDE                 | 0.525                                                        | 3.412                          | 963.13             | 3286.51            | 1.791                          | 807.49             | 1445.91            |
| A_68_P21631064 | chr2:130493650-130493694                          | NM_025922:96        | Itpa       | INSIDE                 | 0.298                                                        | 2.064                          | 4791.59            | 9890.47            | 0.615                          | 3285.60            | 2021.26            |
| A_68_P28693227 | chr12:103943323-103943367                         | NM_172584:-265      | Itpk1      | PROMOTER               | 0.492                                                        | 10.242                         | 904.96             | 9268.19            | 5.036                          | 796.13             | 4009.56            |
| A_68_P21571253 | chr2:119569096-119569140                          | NM_146125:1046      | Itpka      | INSIDE                 | 0.186                                                        | 22.215                         | 2709.16            | 60183.55           | 4.137                          | 2120.51            | 8772.03            |
| A_68_P25016218 | chr7:28013554-28013598                            | NM_181593:40        | Itpkc      | INSIDE                 | 0.424                                                        | 16.169                         | 833.68             | 13480.08           | 6.849                          | 671.27             | 4597.69            |
| A_68_P32152778 | chr19:47993679-47993723                           | NM_001001738:89     | Itrip1     | INSIDE                 | 0.329                                                        | 5.622                          | 650.31             | 3655.92            | 1.848                          | 674.75             | 1247.26            |
| A_68_P25458530 | chr7:125633291-125633335                          | NM_001033380:2177   | Itrip12    | INSIDE                 | 0.492                                                        | 0.503                          | 2854.22            | 1434.94            | 0.247                          | 1990.52            | 492.02             |
| A_68_P25458544 | chr7:125634804-125634848                          | NM_001033380:663    | Itrip12    | INSIDE                 | 0.512                                                        | 0.401                          | 1280.54            | 513.28             | 0.205                          | 1037.94            | 213.16             |
| A_68_P30964671 | chr16:91730311-91730355                           | NM_001110276:717    | Its1       | INSIDE                 | 0.601                                                        | 0.443                          | 3873.75            | 1716.56            | 0.266                          | 2635.96            | 701.69             |
| A_68_P31601053 | chr18:32227655-32227699                           | NM_173441:289       | Iws1       | INSIDE                 | 0.601                                                        | 0.627                          | 1223.68            | 767.83             | 0.377                          | 920.90             | 347.10             |
| A_68_P27284931 | chr10:80165309-80165353                           | NM_027829:-107      | Izumo4     | DIVERGENT_PROMOTER     | 0.619                                                        | 3.797                          | 3907.29            | 14834.83           | 2.349                          | 3037.74            | 7136.60            |
| A_68_P21666835 | chr2:136940626-136940670                          | NM_013822:1608      | Jag1       | INSIDE                 | 0.623                                                        | 0.563                          | 1111.48            | 625.25             | 0.35                           | 832.34             | 291.65             |
| A_68_P25958256 | chr8:74203690-74203734                            | NM_001190830:3431   | Jak3       | INSIDE                 | 0.137                                                        | 27.220                         | 842.86             | 22942.59           | 3.719                          | 707.30             | 2630.20            |
| A_68_P23611439 | chr5:37482314-37482358                            | NM_178394:40241     | Jakmp1     | INSIDE                 | 0.33                                                         | 0.692                          | 2000.66            | 1383.82            | 0.228                          | 1495.74            | 341.67             |
| A_68_P30925479 | chr16:84774664-84774708                           | NM_023844:319       | Jam2       | INSIDE                 | 0.58                                                         | 6.481                          | 959.24             | 6216.45            | 3.761                          | 880.55             | 3312.08            |
| A_68_P30925477 | chr16:84774396-84774440                           | NM_023844:51        | Jam2       | INSIDE                 | 0.406                                                        | 0.657                          | 3115.12            | 2047.97            | 0.267                          | 2295.00            | 612.21             |
| A_68_P26374351 | chr9:26962634-26962678                            | NM_023277:350       | Jam3       | INSIDE                 | 0.662                                                        | 4.887                          | 725.17             | 3544.05            | 3.238                          | 601.20             | 1946.46            |
| A_68_P28997663 | chr13:44826717-44826761                           | NM_001205043:99     | Jarid2     | INSIDE                 | 0.226                                                        | 20.566                         | 4994.44            | 102713.30          | 4.655                          | 4289.58            | 19966.52           |
| A_68_P28997682 | chr13:44829049-44829093                           | NM_001205043:2431   | Jarid2     | INSIDE                 | 0.348                                                        | 30.171                         | 10760.54           | 324652.40          | 10.487                         | 10207.91           | 107055.20          |
| A_68_P28998903 | chr13:44998308-44998352                           | NM_001205043:171691 | Jarid2     | INSIDE                 | 0.435                                                        | 6.846                          | 3166.83            | 21678.85           | 2.977                          | 2520.40            | 7502.30            |
| A_68_P28605007 | chr12:86940319-86940363                           | NM_030887:-25       | Jdp2       | PROMOTER               | 0.179                                                        | 45.373                         | 5116.31            | 232143.00          | 8.133                          | 5396.53            | 43889.39           |
| A_68_P28605005 | chr12:86939999-86940043                           | NM_001205052:-34    | Jdp2       | PROMOTER               | 0.661                                                        | 2.920                          | 1330.16            | 3883.50            | 1.929                          | 1103.85            | 2129.85            |
| A_68_P24381989 | chr6:39155596-39155640                            | NM_001033430:1154   | Jhdm1d     | INSIDE                 | 0.222                                                        | 23.176                         | 3823.62            | 88617.98           | 5.138                          | 4429.59            | 22761.16           |
| A_68_P24381994 | chr6:39156178-39156223                            | NM_001033430:572    | Jhdm1d     | INSIDE                 | 0.586                                                        | 0.647                          | 1059.83            | 685.78             | 0.379                          | 839.27             | 317.97             |
| A_68_P28530101 | chr12:73186989-73187033                           | NM_001205067:185    | Jkamp      | INSIDE                 | 0.252                                                        | 22.635                         | 1946.75            | 44064.46           | 5.7                            | 2060.00            | 11742.81           |

| ProbeName      | Target position of probe on CpG island microarray | TargetID          | GeneSymbol | CpG island Description | Ratio of relative methylation (TiO <sub>2</sub> -NP/Vehicle) | Sham group                     |                    |                    | TiO <sub>2</sub> -H group      |                    |                    |
|----------------|---------------------------------------------------|-------------------|------------|------------------------|--------------------------------------------------------------|--------------------------------|--------------------|--------------------|--------------------------------|--------------------|--------------------|
|                |                                                   |                   |            |                        |                                                              | Relative methylation (Cy5/Cy3) | Cy3 signal (Input) | Cy5 signal (MeDIP) | Relative methylation (Cy5/Cy3) | Cy3 signal (Input) | Cy5 signal (MeDIP) |
| A_68_P28530098 | chr12:73186548-73186592                           | NM_001205067:-255 | Jkamp      | DIVERGENT_PROMOTER     | 0.303                                                        | 5.710                          | 1286.00            | 7343.38            | 1.727                          | 1000.61            | 1728.43            |
| A_68_P27836979 | chr11:59263493-59263537                           | NM_001205068:-32  | Jmjd4      | DIVERGENT_PROMOTER     | 0.617                                                        | 0.404                          | 1241.18            | 500.96             | 0.249                          | 1015.58            | 252.77             |
| A_68_P28161573 | chr11:116704755-116704799                         | NM_033398:-13     | Jmjd6      | DIVERGENT_PROMOTER     | 0.268                                                        | 0.379                          | 2236.17            | 847.18             | 0.101                          | 1699.33            | 172.25             |
| A_68_P28161572 | chr11:116704633-116704677                         | NM_033398:109     | Jmjd6      | INSIDE                 | 0.565                                                        | 4.099                          | 2190.15            | 8978.22            | 2.318                          | 1796.52            | 4164.00            |
| A_68_P21572764 | chr2:119853205-119853250                          | NM_001114637:9    | Jmjd7      | INSIDE                 | 0.408                                                        | 0.603                          | 2059.89            | 1242.09            | 0.246                          | 1678.45            | 412.65             |
| A_68_P30367903 | chr15:79518094-79518138                           | NM_028792:186     | Josd1      | INSIDE                 | 0.584                                                        | 5.818                          | 1310.26            | 7623.08            | 3.397                          | 1055.39            | 3584.75            |
| A_68_P26228657 | chr8:124277495-124277539                          | NM_020605:23058   | Jph3       | INSIDE                 | 0.354                                                        | 5.501                          | 3487.99            | 19186.51           | 1.948                          | 2204.93            | 4294.49            |
| A_68_P26228499 | chr8:124254393-124254437                          | NM_020605:-44     | Jph3       | PROMOTER               | 0.299                                                        | 5.446                          | 8497.77            | 46276.12           | 1.626                          | 6690.67            | 10877.92           |
| A_68_P26228652 | chr8:124276907-124276951                          | NM_020605:22470   | Jph3       | INSIDE                 | 0.216                                                        | 7.245                          | 1923.37            | 13935.40           | 1.564                          | 1431.14            | 2238.10            |
| A_68_P22324052 | chr3:90035906-90035950                            | NM_206924:410     | Jtb        | INSIDE                 | 0.66                                                         | 2.304                          | 1445.62            | 3330.58            | 1.522                          | 1113.35            | 1693.99            |
| A_68_P29613087 | chr14:55194747-55194791                           | NM_010590:1730    | Jub        | INSIDE                 | 0.285                                                        | 7.831                          | 2751.01            | 21541.86           | 2.229                          | 2476.38            | 5519.09            |
| A_68_P29613086 | chr14:55194659-55194703                           | NM_010590:1818    | Jub        | INSIDE                 | 0.358                                                        | 7.023                          | 2275.71            | 15981.85           | 2.516                          | 1954.89            | 4919.23            |
| A_68_P23120719 | chr4:94719459-94719503                            | NM_010591:-567    | Jun        | PROMOTER               | 0.513                                                        | 3.781                          | 7295.38            | 27583.54           | 1.94                           | 5427.99            | 10532.67           |
| A_68_P23120696 | chr4:94716722-94716767                            | NM_010591:2169    | Jun        | INSIDE                 | 0.643                                                        | 0.547                          | 1318.68            | 720.76             | 0.351                          | 1165.55            | 409.66             |
| A_68_P23120705 | chr4:94717778-94717822                            | NM_010591:1113    | Jun        | INSIDE                 | 0.664                                                        | 3.621                          | 1111.05            | 4023.42            | 2.404                          | 999.06             | 2401.58            |
| A_68_P23120704 | chr4:94717633-94717677                            | NM_010591:1259    | Jun        | INSIDE                 | 0.459                                                        | 0.601                          | 1396.71            | 839.61             | 0.276                          | 946.56             | 261.46             |
| A_68_P23120712 | chr4:94718521-94718565                            | NM_010591:371     | Jun        | INSIDE                 | 0.431                                                        | 0.556                          | 985.27             | 548.08             | 0.24                           | 727.06             | 174.50             |
| A_68_P25953471 | chr8:73223632-73223676                            | NM_010592:2017    | Jund       | INSIDE                 | 0.612                                                        | 7.930                          | 1425.47            | 11304.46           | 4.851                          | 1222.03            | 5927.98            |
| A_68_P28067852 | chr11:100258833-100258877                         | NM_010593:250     | Jup        | INSIDE                 | 0.264                                                        | 19.103                         | 2901.44            | 55426.13           | 5.051                          | 2654.17            | 13407.18           |
| A_68_P32028426 | chr19:25311621-25311665                           | NM_181404:-49     | Kank1      | PROMOTER               | 0.492                                                        | 0.370                          | 1495.52            | 553.18             | 0.182                          | 1221.74            | 222.56             |
| A_68_P26348961 | chr9:21602785-21602833                            | NM_145611:182     | Kank2      | INSIDE                 | 0.171                                                        | 0.362                          | 4326.83            | 1564.86            | 0.062                          | 3172.52            | 196.39             |
| A_68_P26348962 | chr9:21602957-21603001                            | NM_145611:12      | Kank2      | INSIDE                 | 0.411                                                        | 5.962                          | 2033.57            | 12123.94           | 2.45                           | 1632.51            | 3999.50            |
| A_68_P26348964 | chr9:21603129-21603173                            | NM_145611:-160    | Kank2      | PROMOTER               | 0.631                                                        | 2.863                          | 1128.16            | 3229.66            | 1.808                          | 1057.41            | 1911.46            |
| A_68_P31150606 | chr17:33954625-33954670                           | NM_030697:7180    | Kank3      | INSIDE                 | 0.289                                                        | 6.053                          | 689.19             | 4171.81            | 1.749                          | 621.90             | 1087.45            |
| A_68_P28069613 | chr11:100569782-100569828                         | NM_001038010:3977 | Kat2a      | INSIDE                 | 0.293                                                        | 13.585                         | 501.08             | 6807.32            | 3.986                          | 337.99             | 1347.24            |
| A_68_P28069617 | chr11:100570105-100570149                         | NM_001038010:3655 | Kat2a      | INSIDE                 | 0.43                                                         | 4.825                          | 1099.78            | 5306.49            | 2.074                          | 927.52             | 1923.39            |
| A_68_P31244142 | chr17:53707297-53707341                           | NM_020005:1023    | Kat2b      | INSIDE                 | 0.527                                                        | 3.991                          | 868.65             | 3466.82            | 2.105                          | 755.15             | 1589.70            |
| A_68_P31244136 | chr17:53706802-53706846                           | NM_020005:529     | Kat2b      | INSIDE                 | 0.619                                                        | 2.746                          | 768.35             | 2110.09            | 1.7                            | 600.24             | 1020.37            |
| A_68_P24182264 | chr5:149740161-149740215                          | NM_153572:35      | Katnal1    | INSIDE                 | 0.471                                                        | 0.380                          | 1311.63            | 499.03             | 0.179                          | 940.46             | 168.38             |
| A_68_P24182263 | chr5:149739992-149740036                          | NM_153572:209     | Katnal1    | INSIDE                 | 0.504                                                        | 5.361                          | 2609.49            | 13989.98           | 2.703                          | 2053.42            | 5549.88            |
| A_68_P26081249 | chr8:97605091-97605135                            | NM_028805:12      | Katnb1     | INSIDE                 | 0.245                                                        | 0.412                          | 2396.49            | 987.25             | 0.101                          | 1694.72            | 171.15             |
| A_68_P26081251 | chr8:97605349-97605393                            | NM_028805:270     | Katnb1     | INSIDE                 | 0.665                                                        | 0.564                          | 4282.02            | 2413.21            | 0.375                          | 3026.25            | 1133.68            |
| A_68_P32136345 | chr19:45154436-45154480                           | NM_178929:3830    | Kazald1    | DOWNSTREAM             | 0.521                                                        | 2.901                          | 3774.36            | 10949.40           | 1.512                          | 2928.13            | 4427.24            |
| A_68_P25678290 | chr8:15028480-15028524                            | NM_029116:17478   | Kbtbd11    | INSIDE                 | 0.286                                                        | 28.325                         | 1548.81            | 43870.60           | 8.089                          | 1357.34            | 10979.26           |
| A_68_P25678159 | chr8:15011427-15011471                            | NM_029116:424     | Kbtbd11    | INSIDE                 | 0.388                                                        | 5.831                          | 3028.76            | 17659.41           | 2.265                          | 2360.44            | 5346.24            |
| A_68_P25678160 | chr8:15011568-15011612                            | NM_029116:566     | Kbtbd11    | INSIDE                 | 0.489                                                        | 0.212                          | 2977.21            | 632.21             | 0.104                          | 2183.12            | 226.58             |
| A_68_P25678286 | chr8:15027955-15027999                            | NM_029116:16952   | Kbtbd11    | INSIDE                 | 0.576                                                        | 3.456                          | 737.63             | 2549.35            | 1.991                          | 745.14             | 1483.78            |
| A_68_P26587421 | chr9:65238821-65238865                            | NM_028974:617     | Kbtbd13    | INSIDE                 | 0.239                                                        | 13.355                         | 803.00             | 10723.86           | 3.19                           | 729.63             | 2327.81            |
| A_68_P24476912 | chr6:56747694-56747738                            | NM_145958:91      | Kbtbd2     | INSIDE                 | 0.469                                                        | 4.412                          | 1110.01            | 4897.46            | 2.071                          | 953.86             | 1975.12            |
| A_68_P26885522 | chr9:121686826-121686870                          | NM_028202:124     | Kbtbd5     | INSIDE                 | 0.6                                                          | 4.204                          | 523.35             | 2200.08            | 2.524                          | 461.95             | 1165.74            |
| A_68_P24660677 | chr6:95068035-95068079                            | NM_001008785:157  | Kbtbd8     | INSIDE                 | 0.549                                                        | 0.529                          | 4497.14            | 2380.29            | 0.291                          | 3435.60            | 998.43             |
| A_68_P24660675 | chr6:95067758-95067802                            | NM_001008785:-119 | Kbtbd8     | PROMOTER               | 0.576                                                        | 0.433                          | 1506.39            | 651.60             | 0.249                          | 1254.16            | 312.24             |
| A_68_P24828018 | chr6:126594962-126595006                          | NM_010595:835     | Kcna1      | INSIDE                 | 0.664                                                        | 0.253                          | 2561.43            | 647.69             | 0.168                          | 1806.70            | 303.50             |
| A_68_P22404196 | chr3:106904415-106904459                          | NM_008417:-48     | Kcna2      | PROMOTER               | 0.458                                                        | 5.734                          | 2433.95            | 13957.27           | 2.629                          | 2125.46            | 5587.19            |
| A_68_P25092915 | chr7:52661625-52661669                            | NM_010596:317     | Kcna7      | INSIDE                 | 0.423                                                        | 0.309                          | 1776.92            | 549.92             | 0.131                          | 1315.91            | 172.22             |
| A_68_P25092916 | chr7:52661724-52661768                            | NM_010596:417     | Kcna7      | INSIDE                 | 0.582                                                        | 7.510                          | 1765.36            | 13257.75           | 4.372                          | 1372.68            | 6001.24            |



| ProbeName      | Target position of probe on CpG island microarray | TargetID           | GeneSymbol | CpG island Description | Ratio of relative methylation (TiO <sub>2</sub> -NP/Vehicle) | Sham group                     |                    |                    | TiO <sub>2</sub> -H group      |                    |                    |
|----------------|---------------------------------------------------|--------------------|------------|------------------------|--------------------------------------------------------------|--------------------------------|--------------------|--------------------|--------------------------------|--------------------|--------------------|
|                |                                                   |                    |            |                        |                                                              | Relative methylation (Cy5/Cy3) | Cy3 signal (Input) | Cy5 signal (MeDIP) | Relative methylation (Cy5/Cy3) | Cy3 signal (Input) | Cy5 signal (MeDIP) |
| A_68_P25092919 | chr7:52661992-52662036                            | NM_010596:685      | Kcna7      | INSIDE                 | 0.612                                                        | 4.137                          | 948.95             | 3925.84            | 2.532                          | 763.47             | 1932.83            |
| A_68_P27894336 | chr11:69139970-69140014                           | NM_010599:233      | Kcnaab3    | INSIDE                 | 0.225                                                        | 3.058                          | 7713.08            | 23585.02           | 0.689                          | 5318.43            | 3666.06            |
| A_68_P21834182 | chr2:167015184-167015228                          | NM_008420:-907     | Kcnb1      | PROMOTER               | 0.248                                                        | 18.516                         | 3238.05            | 59954.17           | 4.583                          | 2705.09            | 12398.09           |
| A_68_P21833675 | chr2:166930471-166930515                          | NM_008420:83807    | Kcnb1      | INSIDE                 | 0.382                                                        | 4.859                          | 2978.21            | 14471.27           | 1.857                          | 2217.62            | 4118.91            |
| A_68_P21833676 | chr2:166930579-166930623                          | NM_008420:83699    | Kcnb1      | INSIDE                 | 0.376                                                        | 5.091                          | 1233.40            | 6278.83            | 1.913                          | 856.46             | 1638.79            |
| A_68_P21833672 | chr2:166930250-166930294                          | NM_008420:84027    | Kcnb1      | INSIDE                 | 0.642                                                        | 2.750                          | 1746.90            | 4803.47            | 1.764                          | 1257.15            | 2218.09            |
| A_68_P21834179 | chr2:167014887-167014931                          | NM_008420:-609     | Kcnb1      | PROMOTER               | 0.408                                                        | 0.589                          | 936.89             | 552.21             | 0.24                           | 725.54             | 174.39             |
| A_68_P21834170 | chr2:167013596-167013640                          | NM_008420:681      | Kcnb1      | INSIDE                 | 0.376                                                        | 4.129                          | 1655.95            | 6836.63            | 1.553                          | 1137.84            | 1767.44            |
| A_68_P25099054 | chr7:53683157-53683201                            | NM_001112739:31312 | Kcnc1      | INSIDE                 | 0.156                                                        | 20.408                         | 2045.73            | 41750.30           | 3.193                          | 1296.96            | 4140.88            |
| A_68_P25098809 | chr7:53651661-53651705                            | NM_008421:-155     | Kcnc1      | PROMOTER               | 0.251                                                        | 12.831                         | 613.13             | 7866.82            | 3.218                          | 528.92             | 1702.26            |
| A_68_P25098815 | chr7:53652229-53652273                            | NM_001112739:384   | Kcnc1      | INSIDE                 | 0.389                                                        | 6.118                          | 2466.46            | 15088.97           | 2.377                          | 2121.18            | 5041.57            |
| A_68_P25098823 | chr7:53653169-53653213                            | NM_001112739:1324  | Kcnc1      | INSIDE                 | 0.427                                                        | 5.938                          | 1314.17            | 7803.02            | 2.534                          | 1162.48            | 2945.43            |
| A_68_P25098813 | chr7:53652081-53652125                            | NM_001112739:236   | Kcnc1      | INSIDE                 | 0.506                                                        | 7.381                          | 1069.23            | 7891.83            | 3.731                          | 990.87             | 3697.05            |
| A_68_P25088287 | chr7:51847145-51847189                            | NM_008422:911      | Kcnc3      | INSIDE                 | 0.435                                                        | 0.301                          | 1686.00            | 508.02             | 0.131                          | 1307.74            | 171.35             |
| A_68_P25088286 | chr7:51846961-51847005                            | NM_008422:727      | Kcnc3      | INSIDE                 | 0.451                                                        | 13.256                         | 3014.90            | 39964.72           | 5.984                          | 2426.53            | 14519.46           |
| A_68_P25088268 | chr7:51844686-51844730                            | NM_008422:-1547    | Kcnc3      | PROMOTER               | 0.4                                                          | 3.413                          | 3444.51            | 11756.75           | 1.366                          | 2959.22            | 4041.90            |
| A_68_P22406469 | chr3:107262382-107262426                          | NM_145922:-588     | Kcnc4      | PROMOTER               | 0.27                                                         | 2.279                          | 8052.46            | 18352.02           | 0.615                          | 5880.26            | 3618.37            |
| A_68_P22406475 | chr3:107263123-107263167                          | NM_145922:-1328    | Kcnc4      | PROMOTER               | 0.55                                                         | 0.709                          | 1174.05            | 832.14             | 0.39                           | 955.17             | 372.54             |
| A_68_P24284108 | chr6:21165672-21165716                            | NM_019697:-414     | Kcnd2      | PROMOTER               | 0.445                                                        | 0.286                          | 1718.01            | 491.13             | 0.127                          | 1371.31            | 174.60             |
| A_68_P24284102 | chr6:21164876-21164920                            | NM_019697:-1210    | Kcnd2      | PROMOTER               | 0.588                                                        | 0.292                          | 1604.96            | 469.17             | 0.172                          | 1216.51            | 209.08             |
| A_68_P22397067 | chr3:105255865-105255909                          | NM_019931:-5847    | Kcnd3      | PROMOTER               | 0.319                                                        | 6.074                          | 1535.86            | 9329.24            | 1.937                          | 1366.98            | 2648.32            |
| A_68_P22397063 | chr3:105255456-105255500                          | NM_019931:-6255    | Kcnd3      | PROMOTER               | 0.337                                                        | 0.555                          | 1948.77            | 1081.71            | 0.187                          | 1561.59            | 292.06             |
| A_68_P28269092 | chr12:17182452-17182496                           | NM_201531:1220     | Kcnf1      | INSIDE                 | 0.316                                                        | 0.554                          | 1301.55            | 720.46             | 0.175                          | 960.04             | 167.83             |
| A_68_P21840390 | chr2:168088577-168088621                          | NM_001081134:6233  | Kcng1      | INSIDE                 | 0.57                                                         | 4.297                          | 4361.24            | 18739.16           | 2.45                           | 2906.36            | 7120.49            |
| A_68_P21840418 | chr2:168094705-168094749                          | NM_001081134:105   | Kcng1      | INSIDE                 | 0.588                                                        | 3.640                          | 983.52             | 3580.12            | 2.139                          | 739.33             | 1581.57            |
| A_68_P21840415 | chr2:168094408-168094454                          | NM_001081134:401   | Kcng1      | INSIDE                 | 0.409                                                        | 4.282                          | 2421.00            | 10365.90           | 1.749                          | 1511.91            | 2645.07            |
| A_68_P31863637 | chr18:80519734-80519778                           | NM_001190373:41237 | Kcng2      | INSIDE                 | 0.203                                                        | 14.789                         | 4055.94            | 59984.47           | 3                              | 3920.61            | 11763.00           |
| A_68_P31863848 | chr18:80559585-80559629                           | NM_001190373:1387  | Kcng2      | INSIDE                 | 0.417                                                        | 0.394                          | 1542.32            | 607.28             | 0.164                          | 1124.70            | 184.51             |
| A_68_P31863635 | chr18:80519494-80519538                           | NM_001190373:41477 | Kcng2      | INSIDE                 | 0.64                                                         | 3.831                          | 441.64             | 1691.72            | 2.452                          | 409.67             | 1004.58            |
| A_68_P23540978 | chr5:23830927-23830971                            | NM_013569:26474    | Kcnh2      | INSIDE                 | 0.096                                                        | 18.023                         | 2213.80            | 39899.76           | 1.728                          | 1657.58            | 2864.20            |
| A_68_P30478814 | chr15:99054189-99054233                           | NM_010601:-1196    | Kcnh3      | PROMOTER               | 0.61                                                         | 8.345                          | 2950.99            | 24627.05           | 5.093                          | 2417.99            | 12314.27           |
| A_68_P30478815 | chr15:99054306-99054350                           | NM_010601:-1078    | Kcnh3      | PROMOTER               | 0.496                                                        | 3.058                          | 1369.67            | 4187.86            | 1.515                          | 1145.96            | 1736.21            |
| A_68_P27697249 | chr11:33743483-33743527                           | NM_001190885:81    | Kcnip1     | INSIDE                 | 0.27                                                         | 13.568                         | 5255.63            | 71308.33           | 3.669                          | 4708.97            | 17276.87           |
| A_68_P32140683 | chr19:45890581-45890625                           | NM_030716:-309     | Kcnip2     | PROMOTER               | 0.268                                                        | 5.417                          | 2890.15            | 15656.76           | 1.453                          | 2399.06            | 3485.83            |
| A_68_P21613747 | chr2:127308014-127308058                          | NM_001111331:199   | Kcnip3     | INSIDE                 | 0.32                                                         | 0.420                          | 3906.05            | 1640.46            | 0.134                          | 2692.95            | 361.81             |
| A_68_P21613749 | chr2:127308338-127308382                          | NM_001111331:-125  | Kcnip3     | PROMOTER               | 0.549                                                        | 19.367                         | 1113.17            | 21559.32           | 10.641                         | 1073.31            | 11420.83           |
| A_68_P20832484 | chr1:174270940-174270984                          | NM_001039484:-378  | Kcnj10     | PROMOTER               | 0.045                                                        | 7.362                          | 3003.23            | 22108.38           | 0.333                          | 2186.16            | 728.77             |
| A_68_P20832486 | chr1:174271151-174271195                          | NM_001039484:-168  | Kcnj10     | PROMOTER               | 0.386                                                        | 0.345                          | 1768.62            | 610.59             | 0.133                          | 1283.95            | 171.26             |
| A_68_P20832488 | chr1:174271323-174271367                          | NM_001039484:4     | Kcnj10     | INSIDE                 | 0.464                                                        | 0.571                          | 2294.72            | 1311.16            | 0.265                          | 1607.46            | 426.14             |
| A_68_P20832487 | chr1:174271228-174271272                          | NM_001039484:-90   | Kcnj10     | PROMOTER               | 0.624                                                        | 0.626                          | 4056.32            | 2539.02            | 0.391                          | 2832.93            | 1106.93            |
| A_68_P25096865 | chr7:53356200-53356244                            | NM_00120441:-88    | Kcnj11     | PROMOTER               | 0.631                                                        | 12.183                         | 7227.34            | 88051.30           | 7.683                          | 6783.89            | 52118.43           |
| A_68_P25095297 | chr7:53075356-53075400                            | NM_145963:4739     | Kcnj14     | INSIDE                 | 0.318                                                        | 7.997                          | 3274.23            | 26185.67           | 2.541                          | 2912.29            | 7399.42            |
| A_68_P31425152 | chr17:88197017-88197061                           | NM_199251:296      | Kcnk12     | INSIDE                 | 0.344                                                        | 8.799                          | 1680.83            | 14790.38           | 3.027                          | 1520.29            | 4601.60            |
| A_68_P31425147 | chr17:88196405-88196449                           | NM_199251:908      | Kcnk12     | INSIDE                 | 0.618                                                        | 0.647                          | 873.49             | 565.25             | 0.4                            | 724.27             | 289.76             |
| A_68_P28679268 | chr12:101203451-101203495                         | NM_001164426:764   | Kcnk13     | INSIDE                 | 0.615                                                        | 0.270                          | 2349.47            | 634.17             | 0.166                          | 1725.51            | 286.27             |
| A_68_P21814762 | chr2:163679681-163679725                          | NM_001030292:217   | Kcnk15     | INSIDE                 | 0.545                                                        | 4.843                          | 783.66             | 3795.20            | 2.639                          | 755.23             | 1993.03            |

| ProbeName      | Target position of probe on CpG island microarray | TargetID           | GeneSymbol | CpG island Description | Ratio of relative methylation (TiO <sub>2</sub> -NP/Vehicle) | Sham group                     |                    |                    | TiO <sub>2</sub> -H group      |                    |                    |
|----------------|---------------------------------------------------|--------------------|------------|------------------------|--------------------------------------------------------------|--------------------------------|--------------------|--------------------|--------------------------------|--------------------|--------------------|
|                |                                                   |                    |            |                        |                                                              | Relative methylation (Cy5/Cy3) | Cy3 signal (Input) | Cy5 signal (MeDIP) | Relative methylation (Cy5/Cy3) | Cy3 signal (Input) | Cy5 signal (MeDIP) |
| A_68_P21814796 | chr2:163684382-163684426                          | NM_001030292:4919  | Kenk15     | INSIDE                 | 0.583                                                        | 5.186                          | 2225.56            | 11541.72           | 3.024                          | 1687.71            | 5102.91            |
| A_68_P20925497 | chr1:191167558-191167602                          | NM_001159850:-348  | Kenk2      | PROMOTER               | 0.487                                                        | 3.001                          | 1686.08            | 5059.42            | 1.461                          | 1493.73            | 2181.65            |
| A_68_P23573357 | chr5:30891361-30891405                            | NM_010608:840      | Kenk3      | INSIDE                 | 0.518                                                        | 0.498                          | 1527.80            | 761.11             | 0.258                          | 1279.20            | 330.27             |
| A_68_P23573588 | chr5:30924821-30924865                            | NM_010608:34300    | Kenk3      | INSIDE                 | 0.656                                                        | 2.609                          | 747.65             | 1950.84            | 1.713                          | 754.51             | 1292.25            |
| A_68_P31936764 | chr19:7008234-7008278                             | NM_008431:749      | Kenk4      | INSIDE                 | 0.599                                                        | 3.393                          | 2278.42            | 7730.47            | 2.033                          | 1811.88            | 3684.46            |
| A_68_P31936715 | chr19:7000722-7000766                             | NM_008431:8261     | Kenk4      | INSIDE                 | 0.652                                                        | 3.800                          | 1603.23            | 6091.50            | 2.477                          | 1392.89            | 3450.48            |
| A_68_P29445598 | chr14:21001028-21001072                           | NM_021542:-46      | Kenk5      | PROMOTER               | 0.396                                                        | 9.403                          | 4267.38            | 40125.03           | 3.719                          | 3768.27            | 14015.40           |
| A_68_P29469015 | chr14:24824174-24824218                           | NM_010610:-769     | Kenma1     | PROMOTER               | 0.344                                                        | 13.965                         | 975.81             | 13626.95           | 4.801                          | 800.56             | 3843.67            |
| A_68_P29469016 | chr14:24824250-24824294                           | NM_010610:-845     | Kenma1     | PROMOTER               | 0.533                                                        | 3.383                          | 2132.94            | 7215.90            | 1.803                          | 1735.56            | 3129.79            |
| A_68_P27475788 | chr10:115911221-115911265                         | NM_021452:-663     | Kenmb4     | PROMOTER               | 0.649                                                        | 4.957                          | 1928.13            | 9557.83            | 3.218                          | 1642.97            | 5287.17            |
| A_68_P25954525 | chr8:73380746-73380790                            | NM_032397:139      | Kcnn1      | INSIDE                 | 0.122                                                        | 0.384                          | 5751.18            | 2206.98            | 0.047                          | 3705.75            | 173.22             |
| A_68_P25954496 | chr8:73376577-73376621                            | NM_032397:4309     | Kcnn1      | INSIDE                 | 0.194                                                        | 10.913                         | 1768.20            | 19295.67           | 2.122                          | 1247.22            | 2646.32            |
| A_68_P25954526 | chr8:73380907-73380951                            | NM_032397:-21      | Kcnn1      | PROMOTER               | 0.376                                                        | 1.452                          | 2643.16            | 3837.42            | 0.545                          | 2222.04            | 1212.12            |
| A_68_P25954583 | chr8:73389397-73389441                            | NM_032397:-8511    | Kcnn1      | PROMOTER               | 0.389                                                        | 1.411                          | 2073.78            | 2925.19            | 0.549                          | 1561.47            | 856.59             |
| A_68_P25954428 | chr8:73366677-73366723                            | NM_032397:14207    | Kcnn1      | INSIDE                 | 0.223                                                        | 14.866                         | 222.35             | 3305.43            | 3.31                           | 187.16             | 619.41             |
| A_68_P31672396 | chr18:45718914-45718958                           | NM_080465:-871     | Kcnn2      | PROMOTER               | 0.38                                                         | 0.357                          | 1552.40            | 553.72             | 0.136                          | 1267.20            | 171.95             |
| A_68_P31672403 | chr18:45719784-45719828                           | NM_080465:-1       | Kcnn2      | PROMOTER               | 0.457                                                        | 0.284                          | 3369.40            | 955.33             | 0.13                           | 2465.33            | 319.79             |
| A_68_P31672402 | chr18:45719605-45719649                           | NM_080465:-181     | Kcnn2      | PROMOTER               | 0.519                                                        | 7.294                          | 3937.16            | 28718.46           | 3.782                          | 3434.67            | 12991.30           |
| A_68_P31672401 | chr18:45719495-45719539                           | NM_080465:-291     | Kcnn2      | PROMOTER               | 0.561                                                        | 0.630                          | 2229.96            | 1405.55            | 0.354                          | 1769.64            | 625.77             |
| A_68_P25598742 | chr7:150293216-150293260                          | NM_008434:80       | Kcnn1      | INSIDE                 | 0.267                                                        | 29.120                         | 591.18             | 17215.29           | 7.79                           | 724.91             | 5646.69            |
| A_68_P21908760 | chr2:180869636-180869680                          | NM_001003824:272   | Kcnn2      | INSIDE                 | 0.653                                                        | 3.255                          | 653.35             | 2126.76            | 2.124                          | 565.28             | 1200.85            |
| A_68_P30290903 | chr15:66118372-66118416                           | NM_152923:-608     | Kcnn3      | PROMOTER               | 0.462                                                        | 4.613                          | 996.07             | 4594.83            | 2.132                          | 875.95             | 1867.84            |
| A_68_P23253010 | chr4:120419437-120419481                          | NM_001081142:323   | Kcnn4      | INSIDE                 | 0.168                                                        | 14.857                         | 1280.43            | 19023.78           | 2.501                          | 1107.55            | 2769.56            |
| A_68_P23252661 | chr4:120370848-120370892                          | NM_001081142:48911 | Kcnn4      | INSIDE                 | 0.216                                                        | 8.670                          | 2546.81            | 22080.43           | 1.877                          | 2150.48            | 4035.80            |
| A_68_P23252895 | chr4:120403760-120403804                          | NM_001081142:15999 | Kcnn4      | INSIDE                 | 0.344                                                        | 0.393                          | 2305.34            | 904.90             | 0.135                          | 1703.61            | 230.22             |
| A_68_P20080972 | chr1:21951304-21951348                            | NM_001160139:697   | Kcnn5      | INSIDE                 | 0.421                                                        | 0.455                          | 2016.48            | 917.26             | 0.191                          | 1561.90            | 298.98             |
| A_68_P20080973 | chr1:21951507-21951551                            | NM_001160139:495   | Kcnn5      | INSIDE                 | 0.642                                                        | 3.011                          | 1926.30            | 5800.88            | 1.932                          | 1755.16            | 3390.94            |
| A_68_P21816594 | chr2:163993596-163993640                          | NM_008435:3231     | Kcnn1      | INSIDE                 | 0.613                                                        | 0.372                          | 3288.05            | 1224.32            | 0.228                          | 2325.65            | 530.97             |
| A_68_P21816616 | chr2:163996879-163996923                          | NM_008435:-51      | Kcnn1      | PROMOTER               | 0.631                                                        | 2.709                          | 1230.53            | 3334.09            | 1.71                           | 1009.44            | 1726.58            |
| A_68_P21816593 | chr2:163993465-163993515                          | NM_008435:3359     | Kcnn1      | INSIDE                 | 0.214                                                        | 2.250                          | 1057.67            | 2380.19            | 0.482                          | 824.56             | 397.51             |
| A_68_P30130472 | chr15:34767602-34767646                           | NM_181317:489      | Kcnn2      | INSIDE                 | 0.586                                                        | 0.643                          | 1481.50            | 953.16             | 0.377                          | 986.92             | 372.27             |
| A_68_P28236792 | chr12:11157416-11157460                           | NM_173417:-259     | Kcnn3      | PROMOTER               | 0.582                                                        | 18.817                         | 2607.36            | 49062.42           | 10.951                         | 2413.67            | 26433.12           |
| A_68_P21074758 | chr2:25733280-25733324                            | NM_175462:-78      | Kcnn1      | PROMOTER               | 0.443                                                        | 1.445                          | 1959.51            | 2831.41            | 0.641                          | 1431.07            | 916.86             |
| A_68_P30183902 | chr15:44945966-44946010                           | NM_026200:492      | Kcnn1      | INSIDE                 | 0.293                                                        | 22.059                         | 1443.67            | 31846.39           | 6.474                          | 1904.83            | 12332.45           |
| A_68_P31515588 | chr18:15222716-15222760                           | NM_001142731:-647  | Kcnn1      | PROMOTER               | 0.209                                                        | 14.582                         | 1698.98            | 24774.45           | 3.052                          | 1474.68            | 4500.34            |
| A_68_P31515584 | chr18:15221979-15222023                           | NM_001142731:91    | Kcnn1      | INSIDE                 | 0.431                                                        | 5.735                          | 1240.96            | 7116.87            | 2.472                          | 1143.39            | 2826.01            |
| A_68_P31515586 | chr18:15222359-15222403                           | NM_001142731:-289  | Kcnn1      | PROMOTER               | 0.565                                                        | 3.981                          | 1349.06            | 5371.15            | 2.251                          | 1063.40            | 2394.02            |
| A_68_P29863083 | chr14:103380887-103380931                         | NM_177715:946      | Kcnn12     | INSIDE                 | 0.55                                                         | 0.532                          | 1629.94            | 867.49             | 0.293                          | 1236.06            | 362.15             |
| A_68_P29863087 | chr14:103381523-103381567                         | NM_177715:310      | Kcnn12     | INSIDE                 | 0.621                                                        | 11.845                         | 1906.41            | 22582.14           | 7.352                          | 2046.13            | 15042.13           |
| A_68_P25503042 | chr7:134072295-134072339                          | NM_172747:-76      | Kcnn13     | PROMOTER               | 0.595                                                        | 3.359                          | 3482.36            | 11697.06           | 1.999                          | 2772.64            | 5542.07            |
| A_68_P25503044 | chr7:134072503-134072547                          | NM_172747:132      | Kcnn13     | INSIDE                 | 0.614                                                        | 10.313                         | 1902.82            | 19624.25           | 6.335                          | 1570.54            | 9948.65            |
| A_68_P25044855 | chr7:35438249-35438293                            | NM_146188:-410     | Kcnn15     | PROMOTER               | 0.386                                                        | 0.521                          | 1542.65            | 804.30             | 0.201                          | 1238.78            | 249.18             |
| A_68_P30359963 | chr15:78267288-78267332                           | NM_001081367:8253  | Kcnn17     | INSIDE                 | 0.438                                                        | 5.161                          | 2401.27            | 12392.81           | 2.261                          | 1710.70            | 3867.61            |
| A_68_P30359964 | chr15:78267418-78267462                           | NM_001081367:8383  | Kcnn17     | INSIDE                 | 0.227                                                        | 3.083                          | 7871.01            | 24269.27           | 0.701                          | 5502.28            | 3857.48            |
| A_68_P31125154 | chr17:29089463-29089507                           | NM_025888:-676     | Kcnn20     | PROMOTER               | 0.319                                                        | 5.834                          | 1733.35            | 10112.97           | 1.861                          | 1558.60            | 2900.49            |
| A_68_P25349933 | chr7:104480292-104480336                          | NM_001039039:-518  | Kcnn21     | DIVERGENT_PROMOTER     | 0.388                                                        | 0.641                          | 773.80             | 496.07             | 0.249                          | 696.26             | 173.21             |

| ProbeName      | Target position of probe on CpG island microarray | TargetID           | GeneSymbol | CpG island Description | Ratio of relative methylation (TiO <sub>2</sub> -NP/Vehicle) | Sham group                     |                    |                    | TiO <sub>2</sub> -H group      |                    |                    |
|----------------|---------------------------------------------------|--------------------|------------|------------------------|--------------------------------------------------------------|--------------------------------|--------------------|--------------------|--------------------------------|--------------------|--------------------|
|                |                                                   |                    |            |                        |                                                              | Relative methylation (Cy5/Cy3) | Cy3 signal (Input) | Cy5 signal (MeDIP) | Relative methylation (Cy5/Cy3) | Cy3 signal (Input) | Cy5 signal (MeDIP) |
| A_68_P29388379 | chr14:9046505-9046549                             | NM_027782:-135     | Kctd6      | PROMOTER               | 0.532                                                        | 11.768                         | 4201.61            | 49445.11           | 6.265                          | 3553.49            | 22262.29           |
| A_68_P23777458 | chr5:69732840-69732884                            | NM_175519:86       | Kctd8      | INSIDE                 | 0.269                                                        | 70.740                         | 5009.52            | 354371.80          | 19.023                         | 4684.44            | 89112.15           |
| A_68_P30366908 | chr15:79341974-79342018                           | NM_134090:-4841    | Kdelr3     | DIVERGENT_PROMOTER     | 0.633                                                        | 0.642                          | 1622.80            | 1041.80            | 0.406                          | 1090.42            | 443.23             |
| A_68_P30366912 | chr15:79342432-79342476                           | NM_134090:-4383    | Kdelr3     | DIVERGENT_PROMOTER     | 0.22                                                         | 2.296                          | 1656.91            | 3804.60            | 0.505                          | 1233.72            | 622.62             |
| A_68_P30366909 | chr15:79342087-79342131                           | NM_134090:-4729    | Kdelr3     | DIVERGENT_PROMOTER     | 0.151                                                        | 2.534                          | 669.24             | 1695.62            | 0.383                          | 583.03             | 223.43             |
| A_68_P23334806 | chr4:136158309-136158353                          | NM_133872:308      | Kdm1a      | INSIDE                 | 0.238                                                        | 35.282                         | 3402.69            | 120054.60          | 8.395                          | 3248.48            | 27271.42           |
| A_68_P29011271 | chr13:47138796-47138840                           | NM_172262:-89      | Kdm1b      | DIVERGENT_PROMOTER     | 0.247                                                        | 2.550                          | 1605.38            | 4093.90            | 0.629                          | 1396.03            | 878.70             |
| A_68_P31922932 | chr19:4396607-4396651                             | NM_001001984:449   | Kdm2a      | INSIDE                 | 0.27                                                         | 8.036                          | 2934.24            | 23579.01           | 2.172                          | 2800.53            | 6081.63            |
| A_68_P31922938 | chr19:4397627-4397671                             | NM_001001984:-571  | Kdm2a      | PROMOTER               | 0.415                                                        | 7.168                          | 2019.31            | 14474.82           | 2.978                          | 1739.43            | 5180.65            |
| A_68_P24052812 | chr5:123350466-123350510                          | NM_013910:-129     | Kdm2b      | PROMOTER               | 0.268                                                        | 10.856                         | 954.16             | 10358.64           | 2.905                          | 844.16             | 2452.17            |
| A_68_P24053343 | chr5:123439281-123439325                          | NM_001003953:-201  | Kdm2b      | PROMOTER               | 0.352                                                        | 0.357                          | 1785.27            | 636.75             | 0.126                          | 1371.05            | 172.16             |
| A_68_P24053342 | chr5:123439126-123439170                          | NM_001003953:-47   | Kdm2b      | PROMOTER               | 0.402                                                        | 0.300                          | 2701.33            | 810.93             | 0.121                          | 1901.61            | 229.44             |
| A_68_P24052813 | chr5:123350619-123350663                          | NM_013910:-281     | Kdm2b      | PROMOTER               | 0.538                                                        | 5.215                          | 614.74             | 3206.04            | 2.803                          | 441.49             | 1237.62            |
| A_68_P24053344 | chr5:123439364-123439408                          | NM_001003953:-285  | Kdm2b      | PROMOTER               | 0.611                                                        | 2.960                          | 8209.73            | 24299.30           | 1.808                          | 5894.51            | 10656.80           |
| A_68_P24053328 | chr5:123437535-123437579                          | NM_001005866:986   | Kdm2b      | INSIDE                 | 0.486                                                        | 0.696                          | 1047.11            | 728.51             | 0.338                          | 829.56             | 280.28             |
| A_68_P24052806 | chr5:123349603-123349647                          | NM_013910:735      | Kdm2b      | INSIDE                 | 0.64                                                         | 2.523                          | 771.54             | 1946.25            | 1.615                          | 743.18             | 1200.35            |
| A_68_P24537468 | chr6:71583029-71583078                            | NM_001038695:-154  | Kdm3a      | PROMOTER               | 0.525                                                        | 4.327                          | 1426.92            | 6174.18            | 2.271                          | 1014.14            | 2303.49            |
| A_68_P24537472 | chr6:71583440-71583484                            | NM_001038695:-563  | Kdm3a      | PROMOTER               | 0.633                                                        | 0.482                          | 2058.11            | 992.98             | 0.306                          | 1631.59            | 498.67             |
| A_68_P24537464 | chr6:71582547-71582591                            | NM_173001:112      | Kdm3a      | INSIDE                 | 0.104                                                        | 2.436                          | 1017.81            | 2478.93            | 0.253                          | 745.19             | 188.81             |
| A_68_P31614616 | chr18:34937211-34937255                           | NM_001081256:571   | Kdm3b      | INSIDE                 | 0.518                                                        | 5.783                          | 1612.31            | 9323.51            | 2.995                          | 1680.36            | 5032.97            |
| A_68_P31255286 | chr17:56465347-56465391                           | NM_172132:-104     | Kdm4b      | PROMOTER               | 0.26                                                         | 9.069                          | 2095.20            | 19002.17           | 2.355                          | 1747.58            | 4114.94            |
| A_68_P24798118 | chr6:120314755-120314799                          | NM_145997:660      | Kdm5a      | INSIDE                 | 0.565                                                        | 0.546                          | 2553.61            | 1393.58            | 0.308                          | 1785.39            | 550.25             |
| A_68_P24798119 | chr6:120314850-120314894                          | NM_145997:756      | Kdm5a      | INSIDE                 | 0.356                                                        | 1.495                          | 2480.72            | 3708.93            | 0.533                          | 1993.27            | 1061.64            |
| A_68_P20634033 | chr1:136457792-136457836                          | NM_152895:1060     | Kdm5b      | INSIDE                 | 0.6                                                          | 4.849                          | 4196.57            | 20349.16           | 2.908                          | 3252.45            | 9457.53            |
| A_68_P32281781 | chrX:17739765-17739810                            | NM_009483:-5       | Kdm6a      | PROMOTER               | 0.255                                                        | 1.999                          | 1682.78            | 3364.70            | 0.51                           | 2186.26            | 1115.14            |
| A_68_P32281785 | chrX:17740258-17740302                            | NM_009483:488      | Kdm6a      | INSIDE                 | 0.431                                                        | 4.335                          | 1102.87            | 4780.53            | 1.869                          | 1400.87            | 2617.95            |
| A_68_P32281788 | chrX:17740669-17740713                            | NM_009483:898      | Kdm6a      | INSIDE                 | 0.657                                                        | 0.513                          | 999.58             | 512.80             | 0.337                          | 1490.43            | 502.24             |
| A_68_P32281783 | chrX:17740018-17740062                            | NM_009483:248      | Kdm6a      | INSIDE                 | 0.365                                                        | 0.536                          | 1084.69            | 581.61             | 0.196                          | 1370.44            | 268.06             |
| A_68_P32281782 | chrX:17739949-17739993                            | NM_009483:178      | Kdm6a      | INSIDE                 | 0.613                                                        | 2.405                          | 1665.71            | 4006.39            | 1.475                          | 1959.61            | 2889.88            |
| A_68_P27894946 | chr11:69224331-69224375                           | NM_001017426:2825  | Kdm6b      | INSIDE                 | 0.469                                                        | 0.708                          | 4665.06            | 3300.55            | 0.332                          | 2811.40            | 932.84             |
| A_68_P23812530 | chr5:76374553-76374597                            | NM_010612:-121     | Kdr        | PROMOTER               | 0.342                                                        | 9.974                          | 5202.07            | 51884.59           | 3.413                          | 4223.18            | 14411.64           |
| A_68_P20510207 | chr1:108656347-108656391                          | NM_027534:-49      | Kdsr       | PROMOTER               | 0.249                                                        | 6.201                          | 2322.88            | 14403.23           | 1.546                          | 1935.91            | 2992.03            |
| A_68_P26346113 | chr9:21043510-21043554                            | NM_001110305:244   | Keap1      | INSIDE                 | 0.442                                                        | 5.048                          | 1263.25            | 6376.65            | 2.232                          | 1110.11            | 2477.33            |
| A_68_P26346080 | chr9:21037928-21037972                            | NM_001110305:5826  | Keap1      | INSIDE                 | 0.451                                                        | 3.647                          | 1857.59            | 6775.04            | 1.646                          | 1307.28            | 2151.82            |
| A_68_P20127130 | chr1:32229462-32229506                            | NM_133235:-166     | Khdrbs2    | PROMOTER               | 0.385                                                        | 4.886                          | 2172.36            | 10614.90           | 1.882                          | 1956.23            | 3682.04            |
| A_68_P20127131 | chr1:32229533-32229577                            | NM_133235:-96      | Khdrbs2    | PROMOTER               | 0.475                                                        | 5.389                          | 635.18             | 3422.71            | 2.557                          | 521.28             | 1333.03            |
| A_68_P29620447 | chr14:56504073-56504117                           | NM_027143:289      | Khynyn     | INSIDE                 | 0.452                                                        | 0.569                          | 4692.73            | 2670.57            | 0.257                          | 3139.14            | 807.26             |
| A_68_P31259695 | chr17:57170806-57170850                           | NM_010613:102      | Khsrp      | INSIDE                 | 0.258                                                        | 16.053                         | 2332.85            | 37448.62           | 4.135                          | 2131.99            | 8815.79            |
| A_68_P31259625 | chr17:57161925-57161969                           | NM_010613:8984     | Khsrp      | INSIDE                 | 0.375                                                        | 5.849                          | 4876.38            | 28523.05           | 2.191                          | 3711.55            | 8132.93            |
| A_68_P31259627 | chr17:57162083-57162127                           | NM_010613:8826     | Khsrp      | INSIDE                 | 0.349                                                        | 4.962                          | 1360.31            | 6749.79            | 1.734                          | 1033.29            | 1791.65            |
| A_68_P32095251 | chr19:37450692-37450736                           | NM_010615:-178     | Kif11      | PROMOTER               | 0.446                                                        | 0.169                          | 3201.80            | 539.81             | 0.075                          | 2282.31            | 171.56             |
| A_68_P29010691 | chr13:47024841-47024885                           | NM_010617:225      | Kif13a     | INSIDE                 | 0.313                                                        | 9.844                          | 2514.98            | 24757.73           | 3.082                          | 2075.48            | 6396.77            |
| A_68_P29010697 | chr13:47025669-47025713                           | NM_010617:-603     | Kif13a     | PROMOTER               | 0.186                                                        | 0.663                          | 2095.59            | 1389.32            | 0.123                          | 1403.51            | 172.90             |
| A_68_P20646088 | chr1:138363089-138363133                          | NM_001081258:-1424 | Kif14      | PROMOTER               | 0.428                                                        | 8.733                          | 2093.00            | 18279.05           | 3.736                          | 1830.56            | 6838.21            |
| A_68_P20453282 | chr1:94998673-94998717                            | NM_001110315:-252  | Kif1a      | PROMOTER               | 0.25                                                         | 7.282                          | 2757.13            | 20078.38           | 1.817                          | 2848.62            | 5177.21            |
| A_68_P20453280 | chr1:94998488-94998532                            | NM_001110315:-68   | Kif1a      | PROMOTER               | 0.314                                                        | 6.846                          | 1402.53            | 9601.14            | 2.153                          | 1206.85            | 2598.27            |

| ProbeName      | Target position of probe on CpG island microarray | TargetID           | GeneSymbol | CpG island Description | Ratio of relative methylation (TiO <sub>2</sub> -NP/Vehicle) | Sham group                     |                    |                    | TiO <sub>2</sub> -H group      |                    |                    |
|----------------|---------------------------------------------------|--------------------|------------|------------------------|--------------------------------------------------------------|--------------------------------|--------------------|--------------------|--------------------------------|--------------------|--------------------|
|                |                                                   |                    |            |                        |                                                              | Relative methylation (Cy5/Cy3) | Cy3 signal (Input) | Cy5 signal (MeDIP) | Relative methylation (Cy5/Cy3) | Cy3 signal (Input) | Cy5 signal (MeDIP) |
| A_68_P20453264 | chr1:94996840-94996884                            | NM_001110315:1580  | Kif1a      | INSIDE                 | 0.463                                                        | 0.417                          | 1100.70            | 458.77             | 0.193                          | 908.75             | 175.35             |
| A_68_P20453278 | chr1:94998327-94998371                            | NM_001110315:94    | Kif1a      | INSIDE                 | 0.533                                                        | 0.171                          | 2679.34            | 457.95             | 0.091                          | 1929.05            | 175.81             |
| A_68_P20453265 | chr1:94996931-94996975                            | NM_001110315:1490  | Kif1a      | INSIDE                 | 0.625                                                        | 4.489                          | 2277.51            | 10224.81           | 2.807                          | 1894.47            | 5318.38            |
| A_68_P23399812 | chr4:148681667-148681711                          | NM_207682:119      | Kif1b      | INSIDE                 | 0.314                                                        | 14.365                         | 1498.57            | 21526.57           | 4.504                          | 1286.63            | 5795.43            |
| A_68_P23399815 | chr4:148682002-148682046                          | NM_207682:-217     | Kif1b      | PROMOTER               | 0.53                                                         | 0.297                          | 5374.37            | 1596.06            | 0.157                          | 3732.21            | 587.00             |
| A_68_P31613843 | chr18:34784053-34784097                           | NM_001166407:-203  | Kif20a     | PROMOTER               | 0.499                                                        | 0.352                          | 1271.53            | 447.80             | 0.176                          | 977.46             | 171.85             |
| A_68_P32082884 | chr19:34996996-34997040                           | NM_183046:171      | Kif20b     | INSIDE                 | 0.437                                                        | 0.322                          | 1661.98            | 535.27             | 0.141                          | 1479.69            | 208.06             |
| A_68_P32082882 | chr19:34996734-34996778                           | NM_183046:-91      | Kif20b     | PROMOTER               | 0.324                                                        | 5.358                          | 736.49             | 3945.86            | 1.736                          | 703.96             | 1222.07            |
| A_68_P30433473 | chr15:90880476-90880520                           | NM_001109040:-119  | Kif21a     | PROMOTER               | 0.304                                                        | 10.777                         | 4706.66            | 50724.13           | 3.276                          | 4716.99            | 15455.03           |
| A_68_P30433470 | chr15:90880052-90880096                           | NM_001109040:305   | Kif21a     | INSIDE                 | 0.652                                                        | 2.926                          | 1474.02            | 4313.34            | 1.909                          | 1154.64            | 2204.22            |
| A_68_P20644107 | chr1:138036961-138037006                          | NM_001039472:9006  | Kif21b     | INSIDE                 | 0.253                                                        | 48.932                         | 2946.34            | 144171.30          | 12.39                          | 3635.69            | 45046.02           |
| A_68_P20644037 | chr1:138028308-138028352                          | NM_001039472:353   | Kif21b     | INSIDE                 | 0.663                                                        | 0.350                          | 2218.73            | 775.75             | 0.232                          | 1671.00            | 387.36             |
| A_68_P22862283 | chr4:41411609-41411653                            | NM_024241:251      | Kif24      | INSIDE                 | 0.401                                                        | 0.555                          | 2046.47            | 1134.82            | 0.223                          | 1628.68            | 362.60             |
| A_68_P28748276 | chr12:113400089-113400133                         | NM_001097621:15692 | Kif26a     | INSIDE                 | 0.326                                                        | 6.178                          | 3747.61            | 23154.53           | 2.016                          | 2633.00            | 5307.30            |
| A_68_P28748141 | chr12:113384025-113384069                         | NM_001097621:-372  | Kif26a     | PROMOTER               | 0.63                                                         | 0.598                          | 2069.50            | 1237.52            | 0.377                          | 1770.69            | 666.92             |
| A_68_P28748144 | chr12:113384449-113384493                         | NM_001097621:52    | Kif26a     | INSIDE                 | 0.54                                                         | 3.617                          | 851.97             | 3081.55            | 1.952                          | 774.72             | 1512.43            |
| A_68_P28748275 | chr12:113399969-113400013                         | NM_001097621:15572 | Kif26a     | INSIDE                 | 0.209                                                        | 7.682                          | 2756.31            | 21175.17           | 1.608                          | 1860.32            | 2991.25            |
| A_68_P20864287 | chr1:180457911-180457955                          | NM_001161665:-1323 | Kif26b     | PROMOTER               | 0.507                                                        | 0.176                          | 2559.91            | 450.86             | 0.089                          | 1910.65            | 170.75             |
| A_68_P20864304 | chr1:180459747-180459791                          | NM_001161665:513   | Kif26b     | INSIDE                 | 0.535                                                        | 0.260                          | 2545.58            | 660.76             | 0.139                          | 1868.64            | 259.42             |
| A_68_P20864306 | chr1:180459903-180459947                          | NM_001161665:669   | Kif26b     | INSIDE                 | 0.268                                                        | 0.592                          | 1492.57            | 883.27             | 0.158                          | 1098.57            | 174.02             |
| A_68_P29072860 | chr13:58460543-58460587                           | NM_175214:-4341    | Kif27      | PROMOTER               | 0.648                                                        | 0.171                          | 4611.61            | 789.67             | 0.111                          | 3200.26            | 354.97             |
| A_68_P27805436 | chr11:53381255-53381299                           | NM_008443:396      | Kif3a      | INSIDE                 | 0.474                                                        | 0.351                          | 1485.88            | 522.11             | 0.167                          | 1127.81            | 187.99             |
| A_68_P27534887 | chr10:126700073-126700117                         | NM_001039000:325   | Kif5a      | INSIDE                 | 0.459                                                        | 0.247                          | 3645.87            | 902.07             | 0.113                          | 2605.77            | 295.74             |
| A_68_P31472616 | chr18:6241499-6241543                             | NM_008448:2        | Kif5b      | INSIDE                 | 0.367                                                        | 52.116                         | 1248.26            | 65054.65           | 19.129                         | 1274.37            | 24376.90           |
| A_68_P21203206 | chr2:49475493-49475538                            | NM_008449:682      | Kif5c      | INSIDE                 | 0.27                                                         | 6.064                          | 1425.87            | 8646.00            | 1.638                          | 1304.51            | 2136.40            |
| A_68_P21203199 | chr2:49474675-49474719                            | NM_008449:-137     | Kif5c      | PROMOTER               | 0.39                                                         | 4.270                          | 752.93             | 3215.26            | 1.664                          | 680.83             | 1132.70            |
| A_68_P31223848 | chr17:49754556-49754600                           | NM_177052:82       | Kif6       | INSIDE                 | 0.393                                                        | 0.387                          | 1849.38            | 715.58             | 0.152                          | 1229.78            | 187.06             |
| A_68_P25262701 | chr7:86855086-86855130                            | NM_010626:3964     | Kif7       | INSIDE                 | 0.574                                                        | 5.930                          | 446.10             | 2645.27            | 3.404                          | 353.53             | 1203.48            |
| A_68_P30349763 | chr15:76491001-76491045                           | NM_010630:-48      | Kifc2      | DIVERGENT_PROMOTER     | 0.398                                                        | 13.616                         | 2723.23            | 37078.76           | 5.418                          | 2476.48            | 13416.31           |
| A_68_P25031610 | chr7:31242110-31242154                            | NM_172898:402      | Kirrel2    | INSIDE                 | 0.421                                                        | 39.449                         | 1316.05            | 51916.35           | 16.6                           | 1699.24            | 28206.49           |
| A_68_P25031592 | chr7:31239092-31239136                            | NM_172898:3420     | Kirrel2    | INSIDE                 | 0.644                                                        | 0.534                          | 1216.70            | 649.59             | 0.344                          | 1045.48            | 359.56             |
| A_68_P26416478 | chr9:34296474-34296518                            | NM_001190913:181   | Kirrel3    | INSIDE                 | 0.513                                                        | 0.583                          | 1182.38            | 689.03             | 0.299                          | 960.61             | 286.91             |
| A_68_P32383986 | chrX:50097843-50097887                            | NR_003188:-94      | Kis2       | PROMOTER               | 0.349                                                        | 5.786                          | 8280.59            | 47908.36           | 2.021                          | 9638.08            | 19481.23           |
| A_68_P27279739 | chr10:79384461-79384505                           | NM_053244:4767     | Kiss1r     | INSIDE                 | 0.483                                                        | 0.359                          | 1394.62            | 500.59             | 0.173                          | 1182.77            | 204.97             |
| A_68_P27279734 | chr10:79383882-79383926                           | NM_053244:4189     | Kiss1r     | INSIDE                 | 0.624                                                        | 4.801                          | 2768.17            | 13290.42           | 2.995                          | 2320.87            | 6950.62            |
| A_68_P23809987 | chr5:75970827-75970871                            | NM_001122733:-163  | Kit        | PROMOTER               | 0.241                                                        | 2.635                          | 2626.85            | 6922.63            | 0.635                          | 1989.73            | 1262.89            |
| A_68_P23756018 | chr5:65771113-65771157                            | NM_031180:31485    | Klb        | INSIDE                 | 0.496                                                        | 7.838                          | 1216.91            | 9537.76            | 3.886                          | 1164.00            | 4523.08            |
| A_68_P28745894 | chr12:112997376-112997420                         | NM_008450:339      | Klc1       | INSIDE                 | 0.475                                                        | 3.260                          | 6367.80            | 20756.28           | 1.548                          | 4881.01            | 7555.90            |
| A_68_P31927058 | chr19:5118339-5118383                             | NM_008451:48       | Klc2       | INSIDE                 | 0.494                                                        | 3.818                          | 1109.19            | 4234.86            | 1.885                          | 950.57             | 1791.62            |
| A_68_P31927053 | chr19:5117800-5117844                             | NM_008451:586      | Klc2       | INSIDE                 | 0.608                                                        | 0.524                          | 960.53             | 503.18             | 0.318                          | 764.66             | 243.51             |
| A_68_P24993125 | chr7:19989502-19989546                            | NM_146182:-4319    | Klc3       | DIVERGENT_PROMOTER     | 0.354                                                        | 14.418                         | 648.38             | 9348.06            | 5.102                          | 493.59             | 2518.52            |
| A_68_P24993122 | chr7:19989220-19989264                            | NM_146182:-4037    | Klc3       | DIVERGENT_PROMOTER     | 0.401                                                        | 13.907                         | 886.35             | 12326.03           | 5.583                          | 749.76             | 4185.77            |
| A_68_P26022557 | chr8:87427077-87427121                            | NM_010635:1272     | Klfl       | INSIDE                 | 0.413                                                        | 5.170                          | 1798.28            | 9297.68            | 2.137                          | 1485.91            | 3176.05            |
| A_68_P30148791 | chr15:38229661-38229705                           | NM_013692:780      | Klfl0      | INSIDE                 | 0.381                                                        | 10.905                         | 1451.12            | 15824.66           | 4.157                          | 1529.86            | 6359.60            |
| A_68_P30148784 | chr15:38228806-38228850                           | NM_013692:1634     | Klfl0      | INSIDE                 | 0.504                                                        | 4.856                          | 2459.22            | 11941.20           | 2.447                          | 2126.00            | 5201.77            |
| A_68_P28290823 | chr12:25335979-25336023                           | NM_178357:-235     | Klfl1      | PROMOTER               | 0.258                                                        | 17.722                         | 4395.79            | 77901.66           | 4.577                          | 3973.86            | 18187.96           |

| ProbeName      | Target position of probe on CpG island microarray | TargetID          | GeneSymbol | CpG island Description | Ratio of relative methylation (TiO <sub>2</sub> -NP/Vehicle) | Sham group                     |                    |                    | TiO <sub>2</sub> -H group      |                    |                    |
|----------------|---------------------------------------------------|-------------------|------------|------------------------|--------------------------------------------------------------|--------------------------------|--------------------|--------------------|--------------------------------|--------------------|--------------------|
|                |                                                   |                   |            |                        |                                                              | Relative methylation (Cy5/Cy3) | Cy3 signal (Input) | Cy5 signal (MeDIP) | Relative methylation (Cy5/Cy3) | Cy3 signal (Input) | Cy5 signal (MeDIP) |
| A_68_P28290825 | chr12:25336262-25336306                           | NM_178357:49      | Klf1       | INSIDE                 | 0.606                                                        | 3.402                          | 1048.34            | 3566.20            | 2.061                          | 863.97             | 1780.32            |
| A_68_P25174396 | chr7:71082541-71082585                            | NM_021366:1239    | Klf13      | INSIDE                 | 0.25                                                         | 18.327                         | 11937.12           | 218772.50          | 4.581                          | 11367.83           | 52076.42           |
| A_68_P25174399 | chr7:71082777-71082821                            | NM_021366:1003    | Klf13      | INSIDE                 | 0.339                                                        | 9.387                          | 2650.33            | 24878.85           | 3.184                          | 2197.99            | 6998.53            |
| A_68_P25174077 | chr7:71036413-71036457                            | NM_021366:47367   | Klf13      | INSIDE                 | 0.474                                                        | 4.516                          | 2962.07            | 13376.75           | 2.14                           | 2307.35            | 4937.92            |
| A_68_P25174406 | chr7:71083847-71083891                            | NM_021366:-67     | Klf13      | PROMOTER               | 0.487                                                        | 9.514                          | 1398.56            | 13306.22           | 4.63                           | 1409.54            | 6526.61            |
| A_68_P24334780 | chr6:30908766-30908810                            | NM_001135093:202  | Klf14      | INSIDE                 | 0.598                                                        | 7.070                          | 409.29             | 2893.56            | 4.227                          | 365.84             | 1546.22            |
| A_68_P24632565 | chr6:90412944-90412988                            | NM_023184:347     | Klf15      | INSIDE                 | 0.231                                                        | 7.821                          | 1533.19            | 11990.76           | 1.81                           | 1377.05            | 2491.99            |
| A_68_P24632571 | chr6:90413720-90413764                            | NM_023184:1123    | Klf15      | INSIDE                 | 0.365                                                        | 8.519                          | 1995.49            | 16999.43           | 3.106                          | 1772.00            | 5503.47            |
| A_68_P24632567 | chr6:90413191-90413235                            | NM_023184:593     | Klf15      | INSIDE                 | 0.594                                                        | 0.299                          | 2689.64            | 804.41             | 0.178                          | 1962.08            | 348.86             |
| A_68_P27284036 | chr10:80031664-80031708                           | NM_078477:8355    | Klf16      | INSIDE                 | 0.483                                                        | 6.322                          | 2428.79            | 15355.87           | 3.056                          | 2045.92            | 6253.13            |
| A_68_P27284038 | chr10:80031829-80031873                           | NM_078477:8191    | Klf16      | INSIDE                 | 0.556                                                        | 4.481                          | 1642.29            | 7358.92            | 2.492                          | 1160.64            | 2892.49            |
| A_68_P27284101 | chr10:80040251-80040295                           | NM_078477:-231    | Klf16      | PROMOTER               | 0.372                                                        | 0.651                          | 3165.58            | 2061.57            | 0.242                          | 2376.86            | 576.29             |
| A_68_P27284104 | chr10:80040680-80040724                           | NM_078477:-661    | Klf16      | PROMOTER               | 0.648                                                        | 0.649                          | 2286.92            | 1484.04            | 0.42                           | 1754.91            | 737.89             |
| A_68_P27284037 | chr10:80031748-80031792                           | NM_078477:8271    | Klf16      | INSIDE                 | 0.566                                                        | 2.685                          | 1725.80            | 4633.84            | 1.519                          | 1385.63            | 2104.25            |
| A_68_P25960687 | chr8:74843237-74843281                            | NM_008452:298     | Klf2       | INSIDE                 | 0.506                                                        | 0.610                          | 2973.05            | 1814.99            | 0.309                          | 2073.77            | 640.51             |
| A_68_P25960693 | chr8:74844062-74844106                            | NM_008452:1124    | Klf2       | INSIDE                 | 0.595                                                        | 0.523                          | 872.78             | 456.71             | 0.311                          | 776.03             | 241.50             |
| A_68_P23753093 | chr5:65213285-65213329                            | NM_008453:18545   | Klf3       | INSIDE                 | 0.445                                                        | 4.946                          | 1027.51            | 5082.37            | 2.203                          | 792.73             | 1746.53            |
| A_68_P23753094 | chr5:65213362-65213406                            | NM_008453:18623   | Klf3       | INSIDE                 | 0.533                                                        | 4.177                          | 2271.44            | 9486.65            | 2.228                          | 1774.70            | 3953.37            |
| A_68_P22934435 | chr4:55545469-55545513                            | NM_010637:-143    | Klf4       | PROMOTER               | 0.243                                                        | 17.596                         | 1835.93            | 32305.50           | 4.284                          | 1474.32            | 6316.10            |
| A_68_P22934428 | chr4:55544566-55544610                            | NM_010637:759     | Klf4       | INSIDE                 | 0.423                                                        | 0.439                          | 1069.20            | 469.77             | 0.186                          | 902.40             | 167.52             |
| A_68_P22934417 | chr4:55543327-55543371                            | NM_010637:1999    | Klf4       | INSIDE                 | 0.423                                                        | 4.565                          | 2174.30            | 9925.34            | 1.933                          | 1653.39            | 3195.18            |
| A_68_P22934423 | chr4:55544008-55544052                            | NM_010637:1317    | Klf4       | INSIDE                 | 0.66                                                         | 0.612                          | 3148.06            | 1927.76            | 0.404                          | 2298.95            | 929.46             |
| A_68_P29842698 | chr14:99698055-99698099                           | NM_009769:167     | Klf5       | INSIDE                 | 0.37                                                         | 1.531                          | 3680.85            | 5635.64            | 0.567                          | 3351.95            | 1899.28            |
| A_68_P29842694 | chr14:99697586-99697630                           | NM_009769:-301    | Klf5       | PROMOTER               | 0.497                                                        | 0.662                          | 2080.32            | 1376.82            | 0.329                          | 1553.43            | 511.43             |
| A_68_P29842699 | chr14:99698157-99698201                           | NM_009769:269     | Klf5       | INSIDE                 | 0.438                                                        | 0.677                          | 1579.18            | 1068.39            | 0.296                          | 1420.87            | 420.76             |
| A_68_P32016047 | chr19:23210802-23210846                           | NM_010638:-4891   | Klf9       | PROMOTER               | 0.234                                                        | 11.470                         | 3471.51            | 39819.07           | 2.684                          | 2796.32            | 7504.81            |
| A_68_P32016035 | chr19:23209504-23209553                           | NM_010638:-6187   | Klf9       | PROMOTER               | 0.4                                                          | 0.524                          | 1387.27            | 726.80             | 0.209                          | 914.50             | 191.44             |
| A_68_P32016043 | chr19:23210311-23210355                           | NM_010638:-5383   | Klf9       | PROMOTER               | 0.543                                                        | 7.699                          | 713.90             | 5496.23            | 4.182                          | 726.19             | 3037.23            |
| A_68_P32016039 | chr19:23209957-23210001                           | NM_010638:-5737   | Klf9       | PROMOTER               | 0.591                                                        | 6.789                          | 3967.47            | 26936.11           | 4.01                           | 3747.86            | 15029.50           |
| A_68_P28513502 | chr12:70342816-70342860                           | NM_178253:20      | Klhdc1     | INSIDE                 | 0.556                                                        | 3.937                          | 916.23             | 3607.32            | 2.191                          | 810.62             | 1775.78            |
| A_68_P24332082 | chr6:30409887-30409931                            | NM_029742:58000   | Klhdc10    | DOWNSTREAM             | 0.623                                                        | 0.634                          | 1167.19            | 740.30             | 0.395                          | 1022.73            | 404.42             |
| A_68_P24331758 | chr6:30352294-30352338                            | NM_029742:408     | Klhdc10    | INSIDE                 | 0.478                                                        | 0.651                          | 727.48             | 473.26             | 0.311                          | 619.50             | 192.79             |
| A_68_P28513756 | chr12:70398098-70398142                           | NM_027117:453     | Klhdc2     | INSIDE                 | 0.423                                                        | 0.430                          | 1136.84            | 489.37             | 0.182                          | 984.69             | 179.41             |
| A_68_P24932468 | chr6:147040234-147040278                          | NM_001081237:660  | Klhdc5     | INSIDE                 | 0.403                                                        | 8.342                          | 492.84             | 4111.15            | 3.363                          | 482.77             | 1623.39            |
| A_68_P24932466 | chr6:147039958-147040002                          | NM_001081237:384  | Klhdc5     | INSIDE                 | 0.404                                                        | 4.499                          | 1427.84            | 6416.18            | 1.816                          | 1204.42            | 2187.07            |
| A_68_P20620518 | chr1:134195183-134195227                          | NM_144810:2       | Klhdc8a    | INSIDE                 | 0.485                                                        | 4.697                          | 1444.73            | 6785.27            | 2.278                          | 1322.58            | 3013.07            |
| A_68_P20633482 | chr1:136352339-136352383                          | NM_153128:229     | Klh112     | INSIDE                 | 0.6                                                          | 2.825                          | 657.39             | 1857.41            | 1.695                          | 692.63             | 1173.86            |
| A_68_P32299549 | chrX:22942071-22942115                            | NM_026167:87      | Klh113     | INSIDE                 | 0.609                                                        | 3.914                          | 343.03             | 1342.60            | 2.384                          | 490.28             | 1168.88            |
| A_68_P26823921 | chr9:110379166-110379210                          | NM_177771:10      | Klh118     | INSIDE                 | 0.578                                                        | 0.382                          | 2012.34            | 768.57             | 0.221                          | 1555.14            | 343.36             |
| A_68_P25926103 | chr8:67373325-67373369                            | NM_178633:370     | Klh12      | INSIDE                 | 0.492                                                        | 0.663                          | 2096.45            | 1389.30            | 0.326                          | 1658.60            | 541.28             |
| A_68_P23415961 | chr4:151383718-151383762                          | NM_001033352:741  | Klh121     | INSIDE                 | 0.546                                                        | 3.900                          | 915.52             | 3570.34            | 2.128                          | 713.47             | 1518.53            |
| A_68_P30575507 | chr16:17759672-17759716                           | NM_145479:-19     | Klh122     | PROMOTER               | 0.475                                                        | 0.740                          | 3612.47            | 2673.55            | 0.352                          | 3467.97            | 1220.08            |
| A_68_P30585937 | chr16:20098035-20098079                           | NM_029436:430     | Klh124     | INSIDE                 | 0.264                                                        | 9.914                          | 1789.92            | 17745.53           | 2.613                          | 1554.39            | 4061.57            |
| A_68_P30585939 | chr16:20098297-20098341                           | NM_029436:692     | Klh124     | INSIDE                 | 0.491                                                        | 3.846                          | 1282.59            | 4932.63            | 1.889                          | 1065.10            | 2011.79            |
| A_68_P28206071 | chr12:5382006-5382050                             | NM_001164493:460  | Klh129     | INSIDE                 | 0.581                                                        | 0.277                          | 3449.82            | 955.37             | 0.161                          | 2574.20            | 414.24             |
| A_68_P28206077 | chr12:5382789-5382833                             | NM_001164493:-322 | Klh129     | DIVERGENT_PROMOTER     | 0.534                                                        | 3.564                          | 1037.55            | 3698.33            | 1.903                          | 791.99             | 1507.17            |

| ProbeName      | Target position of probe on CpG island microarray | TargetID          | GeneSymbol | CpG island Description | Ratio of relative methylation (TiO <sub>2</sub> -NP/Vehicle) | Sham group                     |                    |                    | TiO <sub>2</sub> -H group      |                    |                    |
|----------------|---------------------------------------------------|-------------------|------------|------------------------|--------------------------------------------------------------|--------------------------------|--------------------|--------------------|--------------------------------|--------------------|--------------------|
|                |                                                   |                   |            |                        |                                                              | Relative methylation (Cy5/Cy3) | Cy3 signal (Input) | Cy5 signal (MeDIP) | Relative methylation (Cy5/Cy3) | Cy3 signal (Input) | Cy5 signal (MeDIP) |
| A_68_P22787931 | chr4:24778185-24778229                            | NM_001033531:27   | Klhl32     | INSIDE                 | 0.434                                                        | 4.507                          | 5368.11            | 24194.28           | 1.957                          | 4691.34            | 9181.28            |
| A_68_P25362045 | chr7:106617271-106617315                          | NM_028145:2779    | Klhl35     | INSIDE                 | 0.639                                                        | 4.654                          | 648.90             | 3019.75            | 2.973                          | 490.49             | 1458.41            |
| A_68_P23949339 | chr5:104339900-104339944                          | NM_178741:326     | Klhl8      | INSIDE                 | 0.285                                                        | 5.873                          | 1184.58            | 6957.11            | 1.676                          | 988.08             | 1656.07            |
| A_68_P25084097 | chr7:51052779-51052823                            | NM_008940:-146    | Klk8       | PROMOTER               | 0.387                                                        | 0.635                          | 1096.82            | 696.23             | 0.246                          | 885.63             | 217.45             |
| A_68_P31428327 | chr17:88929344-88929388                           | NM_028658:-97     | Klraql     | PROMOTER               | 0.304                                                        | 28.816                         | 2037.74            | 58719.99           | 8.76                           | 2009.20            | 17600.09           |
| A_68_P31428328 | chr17:88929429-88929473                           | NM_028658:-13     | Klraql     | PROMOTER               | 0.497                                                        | 13.045                         | 715.66             | 9335.68            | 6.488                          | 565.24             | 3667.33            |
| A_68_P24378362 | chr6:38586500-38586544                            | NM_001033171:717  | Klrg2      | INSIDE                 | 0.338                                                        | 0.455                          | 1365.55            | 621.75             | 0.154                          | 1136.26            | 174.65             |
| A_68_P24378364 | chr6:38586770-38586814                            | NM_001033171:447  | Klrg2      | INSIDE                 | 0.584                                                        | 3.319                          | 1524.13            | 5057.87            | 1.938                          | 1299.48            | 2518.92            |
| A_68_P23226465 | chr4:115563121-115563165                          | NM_001039124:6138 | Kncn       | DOWNSTREAM             | 0.471                                                        | 0.462                          | 1055.68            | 487.80             | 0.218                          | 799.48             | 174.02             |
| A_68_P22219388 | chr3:68931188-68931232                            | NM_008467:-196    | Kpna4      | PROMOTER               | 0.073                                                        | 2.057                          | 13854.49           | 28505.50           | 0.15                           | 9238.92            | 1388.77            |
| A_68_P28049252 | chr11:97049849-97049893                           | NM_008379:-664    | Kpnb1      | PROMOTER               | 0.261                                                        | 9.297                          | 1000.62            | 9302.49            | 2.422                          | 1047.32            | 2536.53            |
| A_68_P28049241 | chr11:97048390-97048434                           | NM_008379:794     | Kpnb1      | INSIDE                 | 0.58                                                         | 0.321                          | 8256.35            | 2649.53            | 0.186                          | 5813.37            | 1082.12            |
| A_68_P24535484 | chr6:71221790-71221834                            | NM_145568:-200    | Krcc1      | DIVERGENT_PROMOTER     | 0.259                                                        | 23.736                         | 3112.47            | 73877.84           | 6.148                          | 2722.08            | 16734.84           |
| A_68_P24535483 | chr6:71221618-71221662                            | NM_145568:-372    | Krcc1      | DIVERGENT_PROMOTER     | 0.458                                                        | 14.427                         | 685.51             | 9889.51            | 6.602                          | 699.88             | 4620.51            |
| A_68_P31093373 | chr17:23879194-23879238                           | NM_028416:3580    | Kremen2    | INSIDE                 | 0.262                                                        | 2.554                          | 5329.80            | 13613.01           | 0.67                           | 3680.43            | 2465.98            |
| A_68_P26346371 | chr9:21092727-21092771                            | NM_145416:-335    | Kril       | PROMOTER               | 0.628                                                        | 0.602                          | 3347.25            | 2015.55            | 0.378                          | 2359.00            | 892.67             |
| A_68_P26346367 | chr9:21092297-21092341                            | NM_145416:95      | Kril       | INSIDE                 | 0.657                                                        | 0.514                          | 911.29             | 468.79             | 0.338                          | 805.11             | 271.98             |
| A_68_P23447098 | chr5:3803414-3803458                              | NR_033173:256     | Krit1      | INSIDE                 | 0.514                                                        | 10.899                         | 1880.62            | 20497.50           | 5.603                          | 1759.17            | 9856.43            |
| A_68_P30495553 | chr15:101858609-101858653                         | NM_010664:-16     | Krt18      | PROMOTER               | 0.172                                                        | 8.667                          | 1530.43            | 13264.64           | 1.491                          | 1318.32            | 1964.97            |
| A_68_P28066375 | chr11:100006570-100006614                         | NM_008471:641     | Krt19      | INSIDE                 | 0.499                                                        | 4.175                          | 5592.43            | 23346.31           | 2.082                          | 4511.45            | 9391.14            |
| A_68_P23577316 | chr5:31554254-31554298                            | NM_027221:198     | Krtcap3    | INSIDE                 | 0.32                                                         | 13.995                         | 2525.27            | 35341.94           | 4.484                          | 2385.63            | 10697.93           |
| A_68_P27946741 | chr11:78858490-78858534                           | NM_013571:101344  | Ksr1       | INSIDE                 | 0.223                                                        | 19.093                         | 3693.03            | 70512.30           | 4.257                          | 2824.95            | 12025.58           |
| A_68_P27946742 | chr11:78858560-78858604                           | NM_013571:101274  | Ksr1       | INSIDE                 | 0.339                                                        | 7.933                          | 2639.61            | 20941.02           | 2.692                          | 1975.45            | 5318.55            |
| A_68_P24020426 | chr5:117863550-117863594                          | NM_001034873:-436 | Ksr2       | PROMOTER               | 0.294                                                        | 1.822                          | 3302.93            | 6018.79            | 0.535                          | 2569.88            | 1376.05            |
| A_68_P21809534 | chr2:162769378-162769422                          | NM_001081338:200  | L3mbtl1    | INSIDE                 | 0.154                                                        | 14.252                         | 1075.20            | 15324.21           | 2.196                          | 996.64             | 2188.66            |
| A_68_P30378912 | chr15:81494223-81494269                           | NM_145993:-119    | L3mbtl2    | PROMOTER               | 0.3                                                          | 5.223                          | 1163.86            | 6078.34            | 1.565                          | 1155.88            | 1809.30            |
| A_68_P27019249 | chr10:26095302-26095346                           | NM_172787:-333    | L3mbtl3    | PROMOTER               | 0.2                                                          | 9.784                          | 3662.02            | 35830.58           | 1.961                          | 2832.92            | 5555.66            |
| A_68_P31317441 | chr17:68623070-68623114                           | NM_177278:-44     | L3mbtl4    | PROMOTER               | 0.546                                                        | 0.286                          | 5092.04            | 1456.66            | 0.156                          | 3286.63            | 513.66             |
| A_68_P20042287 | chr1:13650338-13650382                            | NM_145381:230     | Lactb2     | INSIDE                 | 0.527                                                        | 7.904                          | 2299.26            | 18172.28           | 4.168                          | 2141.63            | 8925.88            |
| A_68_P31313935 | chr17:68046587-68046631                           | NM_008480:4       | Lama1      | INSIDE                 | 0.41                                                         | 0.543                          | 954.05             | 518.43             | 0.223                          | 779.53             | 173.81             |
| A_68_P21902329 | chr2:179960496-179960540                          | NM_001081171:46   | Lama5      | INSIDE                 | 0.336                                                        | 6.364                          | 1142.50            | 7270.33            | 2.135                          | 1033.74            | 2207.13            |
| A_68_P21902328 | chr2:179960330-179960374                          | NM_001081171:212  | Lama5      | INSIDE                 | 0.391                                                        | 6.734                          | 784.97             | 5286.25            | 2.63                           | 637.65             | 1677.24            |
| A_68_P21902323 | chr2:179959846-179959890                          | NM_001081171:696  | Lama5      | INSIDE                 | 0.497                                                        | 0.199                          | 2394.50            | 477.18             | 0.099                          | 1765.94            | 175.05             |
| A_68_P21902326 | chr2:179960119-179960164                          | NM_001081171:423  | Lama5      | INSIDE                 | 0.524                                                        | 0.405                          | 1412.76            | 571.52             | 0.212                          | 1084.88            | 229.90             |
| A_68_P21902331 | chr2:179960697-179960741                          | NM_001081171:-154 | Lama5      | PROMOTER               | 0.385                                                        | 4.164                          | 1602.68            | 6673.21            | 1.602                          | 1409.02            | 2257.87            |
| A_68_P28330136 | chr12:31950421-31950465                           | NM_008482:284     | Lamb1      | INSIDE                 | 0.53                                                         | 0.650                          | 1422.66            | 925.42             | 0.345                          | 1219.99            | 420.48             |
| A_68_P20726280 | chr1:155180208-155180252                          | NM_010683:-314    | Lamc1      | PROMOTER               | 0.163                                                        | 25.860                         | 16203.73           | 419027.90          | 4.213                          | 15757.72           | 66385.65           |
| A_68_P20726276 | chr1:155179693-155179737                          | NM_010683:202     | Lamc1      | INSIDE                 | 0.203                                                        | 7.878                          | 1241.17            | 9778.35            | 1.598                          | 1318.89            | 2107.60            |
| A_68_P20725330 | chr1:155033404-155033448                          | NM_008485:151     | Lamc2      | INSIDE                 | 0.468                                                        | 0.341                          | 1319.35            | 449.29             | 0.16                           | 1068.22            | 170.41             |
| A_68_P20306027 | chr1:67085323-67085367                            | NM_001190984:64   | Lanc1l     | INSIDE                 | 0.131                                                        | 14.879                         | 2655.91            | 39517.13           | 1.943                          | 2376.55            | 4617.08            |
| A_68_P24479790 | chr6:57652980-57653024                            | NM_133737:554     | Lanc12     | INSIDE                 | 0.456                                                        | 4.502                          | 1005.99            | 4529.21            | 2.053                          | 906.63             | 1861.30            |
| A_68_P32245740 | chrX:8777550-8777594                              | NM_173414:474     | Lanc13     | INSIDE                 | 0.349                                                        | 9.592                          | 1484.17            | 14236.01           | 3.347                          | 1969.47            | 6591.74            |
| A_68_P28225274 | chr12:8928368-8928412                             | NM_008640:278     | Laptm4a    | INSIDE                 | 0.569                                                        | 3.627                          | 2798.59            | 10150.02           | 2.063                          | 2199.44            | 4537.06            |
| A_68_P28225280 | chr12:8929060-8929104                             | NM_008640:970     | Laptm4a    | INSIDE                 | 0.485                                                        | 0.579                          | 944.95             | 546.86             | 0.28                           | 848.32             | 237.93             |
| A_68_P30127461 | chr15:34168406-34168450                           | NM_033521:648     | Laptm4b    | INSIDE                 | 0.622                                                        | 3.197                          | 1526.56            | 4880.56            | 1.989                          | 1230.31            | 2447.01            |
| A_68_P25965605 | chr8:75876686-75876730                            | NM_010687:-253    | Large      | PROMOTER               | 0.251                                                        | 9.088                          | 840.32             | 7637.16            | 2.278                          | 683.67             | 1557.57            |

| ProbeName      | Target position of probe on CpG island microarray | TargetID           | GeneSymbol | CpG island Description | Ratio of relative methylation (TiO <sub>2</sub> -NP/Vehicle) | Sham group                     |                    |                    | TiO <sub>2</sub> -H group      |                    |                    |
|----------------|---------------------------------------------------|--------------------|------------|------------------------|--------------------------------------------------------------|--------------------------------|--------------------|--------------------|--------------------------------|--------------------|--------------------|
|                |                                                   |                    |            |                        |                                                              | Relative methylation (Cy5/Cy3) | Cy3 signal (Input) | Cy5 signal (MeDIP) | Relative methylation (Cy5/Cy3) | Cy3 signal (Input) | Cy5 signal (MeDIP) |
| A_68_P25965606 | chr8:75876811-75876855                            | NM_010687:-377     | Large      | PROMOTER               | 0.539                                                        | 4.281                          | 2551.74            | 10925.25           | 2.309                          | 2121.95            | 4898.95            |
| A_68_P25965603 | chr8:75876434-75876478                            | NM_010687:-1       | Large      | PROMOTER               | 0.336                                                        | 0.606                          | 977.07             | 591.99             | 0.204                          | 877.59             | 178.72             |
| A_68_P27828613 | chr11:57822962-57823006                           | NM_028451:419      | Larp1      | INSIDE                 | 0.191                                                        | 22.907                         | 528.51             | 12106.68           | 4.372                          | 443.33             | 1938.12            |
| A_68_P27828609 | chr11:57822259-57822303                           | NM_028451:-285     | Larp1      | PROMOTER               | 0.405                                                        | 4.652                          | 2208.52            | 10274.83           | 1.885                          | 1845.00            | 3477.85            |
| A_68_P27828619 | chr11:57823508-57823552                           | NM_028451:965      | Larp1      | INSIDE                 | 0.587                                                        | 2.725                          | 2359.55            | 6429.00            | 1.598                          | 1986.28            | 3174.53            |
| A_68_P22082254 | chr3:40753323-40753367                            | NM_001040399:-1208 | Larp1b     | PROMOTER               | 0.266                                                        | 0.307                          | 2638.23            | 810.51             | 0.082                          | 2116.40            | 172.97             |
| A_68_P22082256 | chr3:40753573-40753617                            | NM_001040399:-958  | Larp1b     | PROMOTER               | 0.319                                                        | 5.647                          | 22877.88           | 129182.70          | 1.802                          | 17749.01           | 31990.78           |
| A_68_P22082255 | chr3:40753446-40753490                            | NM_001040399:-1084 | Larp1b     | PROMOTER               | 0.341                                                        | 0.411                          | 3817.27            | 1570.69            | 0.14                           | 2531.94            | 355.16             |
| A_68_P22082262 | chr3:40754266-40754310                            | NM_001040399:-264  | Larp1b     | PROMOTER               | 0.657                                                        | 3.591                          | 391.95             | 1407.61            | 2.358                          | 337.21             | 795.13             |
| A_68_P28814402 | chr13:9093309-9093353                             | NM_172585:180      | Larp4b     | INSIDE                 | 0.376                                                        | 9.157                          | 942.75             | 8633.03            | 3.441                          | 780.80             | 2686.51            |
| A_68_P28814398 | chr13:9092754-9092798                             | NM_172585:-374     | Larp4b     | PROMOTER               | 0.58                                                         | 0.635                          | 2612.19            | 1658.14            | 0.368                          | 2073.66            | 763.46             |
| A_68_P28052725 | chr11:97660923-97660967                           | NM_010688:-41      | Lasp1      | PROMOTER               | 0.258                                                        | 16.486                         | 2771.70            | 45693.91           | 4.261                          | 2551.51            | 10872.38           |
| A_68_P30482201 | chr15:99602827-99602871                           | NM_028015:98       | Lass5      | INSIDE                 | 0.263                                                        | 11.774                         | 3094.04            | 36429.22           | 3.097                          | 2922.19            | 9049.87            |
| A_68_P30482203 | chr15:99603119-99603163                           | NM_028015:-194     | Lass5      | PROMOTER               | 0.564                                                        | 0.331                          | 2892.18            | 958.14             | 0.187                          | 2085.71            | 389.64             |
| A_68_P21305453 | chr2:68700233-68700278                            | NM_172856:642      | Lass6      | INSIDE                 | 0.355                                                        | 9.019                          | 2732.94            | 24647.57           | 3.199                          | 2154.80            | 6892.76            |
| A_68_P21305451 | chr2:68700007-68700051                            | NM_172856:415      | Lass6      | INSIDE                 | 0.506                                                        | 0.451                          | 1020.96            | 460.81             | 0.228                          | 755.77             | 172.56             |
| A_68_P26920199 | chr10:7401013-7401057                             | NM_010690:28       | Lats1      | INSIDE                 | 0.596                                                        | 4.139                          | 1850.72            | 7660.54            | 2.467                          | 1579.74            | 3896.59            |
| A_68_P29629404 | chr14:58310425-58310469                           | NM_015771:54514    | Lats2      | INSIDE                 | 0.537                                                        | 6.484                          | 1765.64            | 11448.43           | 3.483                          | 1261.68            | 4394.29            |
| A_68_P29629463 | chr14:58318497-58318541                           | NM_015771:46442    | Lats2      | INSIDE                 | 0.602                                                        | 5.385                          | 1068.87            | 5755.93            | 3.242                          | 999.54             | 3240.01            |
| A_68_P31343015 | chr17:73268700-73268744                           | NM_029999:1078     | Lbh        | INSIDE                 | 0.518                                                        | 3.357                          | 1573.77            | 5283.40            | 1.74                           | 1264.07            | 2199.45            |
| A_68_P32137222 | chr19:45309238-45309283                           | NM_010691:466      | Lbx1       | INSIDE                 | 0.365                                                        | 10.586                         | 1659.62            | 17567.90           | 3.865                          | 1443.45            | 5579.08            |
| A_68_P32137213 | chr19:45308119-45308163                           | NM_010691:1586     | Lbx1       | DOWNSTREAM             | 0.636                                                        | 0.368                          | 5457.04            | 2009.37            | 0.234                          | 4276.70            | 1001.24            |
| A_68_P32137226 | chr19:45309781-45309825                           | NM_010691:-76      | Lbx1       | PROMOTER               | 0.639                                                        | 21.413                         | 1573.67            | 33696.85           | 13.678                         | 1477.24            | 20206.26           |
| A_68_P26683681 | chr9:83341600-83341644                            | NM_029434:-6888    | Lca5       | PROMOTER               | 0.202                                                        | 2.800                          | 2335.68            | 6539.34            | 0.565                          | 1860.48            | 1051.89            |
| A_68_P21080307 | chr2:26517162-26517206                            | NM_010695:9618     | Len4       | DOWNSTREAM             | 0.586                                                        | 3.588                          | 1457.17            | 5228.30            | 2.103                          | 1265.11            | 2660.56            |
| A_68_P23658784 | chr5:46247513-46247557                            | NM_172153:257      | Lcor1      | INSIDE                 | 0.569                                                        | 0.668                          | 13526.02           | 9037.86            | 0.38                           | 9307.36            | 3535.86            |
| A_68_P23658795 | chr5:46248998-46249042                            | NM_178142:-241     | Lcor1      | PROMOTER               | 0.651                                                        | 2.722                          | 1260.23            | 3429.91            | 1.771                          | 1078.57            | 1910.09            |
| A_68_P29530592 | chr14:35362336-35362380                           | NM_001039074:39435 | Ldb3       | INSIDE                 | 0.495                                                        | 3.705                          | 1133.75            | 4201.09            | 1.835                          | 951.86             | 1746.76            |
| A_68_P26348588 | chr9:21528254-21528298                            | NM_010700:239      | Ldlr       | INSIDE                 | 0.624                                                        | 4.640                          | 420.71             | 1952.05            | 2.895                          | 350.96             | 1016.16            |
| A_68_P21475553 | chr2:102026602-102026646                          | NM_178886:-90      | Ldlrad3    | PROMOTER               | 0.469                                                        | 0.279                          | 2002.60            | 559.61             | 0.131                          | 1299.81            | 170.45             |
| A_68_P21475551 | chr2:102026439-102026483                          | NM_178886:74       | Ldlrad3    | INSIDE                 | 0.31                                                         | 5.301                          | 3475.26            | 18420.90           | 1.644                          | 3401.38            | 5592.18            |
| A_68_P23324724 | chr4:134323586-134323630                          | NM_145554:311      | Ldlrap1    | INSIDE                 | 0.4                                                          | 1.466                          | 3483.36            | 5107.14            | 0.587                          | 2645.97            | 1552.38            |
| A_68_P23324728 | chr4:134324024-134324068                          | NM_145554:-127     | Ldlrap1    | PROMOTER               | 0.211                                                        | 1.987                          | 1157.63            | 2300.52            | 0.42                           | 934.26             | 392.16             |
| A_68_P30395524 | chr15:84388079-84388123                           | NM_177630:153      | Ldoc11     | INSIDE                 | 0.296                                                        | 27.570                         | 2339.53            | 64500.72           | 8.159                          | 2155.00            | 17583.38           |
| A_68_P30395523 | chr15:84387987-84388031                           | NM_177630:245      | Ldoc11     | INSIDE                 | 0.508                                                        | 4.837                          | 1529.89            | 7399.47            | 2.456                          | 1276.49            | 3135.57            |
| A_68_P22530123 | chr3:130809073-130809117                          | NM_010703:-4294    | Lef1       | PROMOTER               | 0.464                                                        | 20.818                         | 1229.38            | 25593.15           | 9.664                          | 1033.56            | 9987.96            |
| A_68_P22530177 | chr3:130815462-130815506                          | NM_010703:2096     | Lef1       | INSIDE                 | 0.524                                                        | 5.006                          | 2693.03            | 13480.68           | 2.625                          | 2115.21            | 5551.97            |
| A_68_P20878385 | chr1:182824965-182825009                          | NM_177099:1737     | Lefty2     | INSIDE                 | 0.409                                                        | 1.577                          | 2504.29            | 3948.52            | 0.645                          | 1888.14            | 1217.32            |
| A_68_P22201288 | chr3:65469873-65469924                            | NM_001166659:-251  | Lekr1      | PROMOTER               | 0.331                                                        | 0.389                          | 1730.71            | 673.35             | 0.129                          | 1331.58            | 171.44             |
| A_68_P22201243 | chr3:65463433-65463477                            | NM_001166659:-6695 | Lekr1      | PROMOTER               | 0.574                                                        | 5.218                          | 812.52             | 4239.66            | 2.995                          | 820.63             | 2457.54            |
| A_68_P22201292 | chr3:65470413-65470457                            | NM_001037923:278   | Lekr1      | INSIDE                 | 0.491                                                        | 3.144                          | 2437.75            | 7664.93            | 1.545                          | 2105.82            | 3252.58            |
| A_68_P31114987 | chr17:27341486-27341531                           | NM_146075:-125     | Lemd2      | PROMOTER               | 0.555                                                        | 2.963                          | 1111.65            | 3294.20            | 1.646                          | 894.15             | 1471.45            |
| A_68_P27500779 | chr10:120416497-120416541                         | NM_001081193:-132  | Lemd3      | PROMOTER               | 0.442                                                        | 10.152                         | 1061.90            | 10779.95           | 4.486                          | 818.06             | 3669.66            |
| A_68_P27500776 | chr10:120416131-120416176                         | NM_001081193:233   | Lemd3      | INSIDE                 | 0.665                                                        | 6.361                          | 279.40             | 1777.24            | 4.229                          | 266.84             | 1128.36            |
| A_68_P27500772 | chr10:120415468-120415512                         | NM_001081193:896   | Lemd3      | INSIDE                 | 0.56                                                         | 0.623                          | 972.25             | 605.52             | 0.349                          | 795.51             | 277.58             |
| A_68_P24946692 | chr7:3616894-3616938                              | NM_027203:526      | Leng1      | INSIDE                 | 0.409                                                        | 0.328                          | 1934.21            | 634.64             | 0.134                          | 1507.99            | 202.39             |

| ProbeName      | Target position of probe on CpG island microarray | TargetID           | GeneSymbol | CpG island Description | Ratio of relative methylation (TiO <sub>2</sub> -NP/Vehicle) | Sham group                     |                    |                    | TiO <sub>2</sub> -H group      |                    |                    |
|----------------|---------------------------------------------------|--------------------|------------|------------------------|--------------------------------------------------------------|--------------------------------|--------------------|--------------------|--------------------------------|--------------------|--------------------|
|                |                                                   |                    |            |                        |                                                              | Relative methylation (Cy5/Cy3) | Cy3 signal (Input) | Cy5 signal (MeDIP) | Relative methylation (Cy5/Cy3) | Cy3 signal (Input) | Cy5 signal (MeDIP) |
| A_68_P24947962 | chr7:4098539-4098584                              | NM_172736:9904     | Leng8      | INSIDE                 | 0.437                                                        | 8.662                          | 1500.55            | 12998.22           | 3.782                          | 1434.60            | 5426.27            |
| A_68_P23244387 | chr4:118905895-118905939                          | NM_001042411:-517  | Lepre1     | PROMOTER               | 0.54                                                         | 5.820                          | 1630.56            | 9490.42            | 3.145                          | 1577.43            | 4961.31            |
| A_68_P30619231 | chr16:26105726-26105770                           | NM_173379:122      | Leprel1    | INSIDE                 | 0.232                                                        | 7.300                          | 2904.48            | 21203.66           | 1.693                          | 2238.65            | 3789.06            |
| A_68_P24817390 | chr6:124807543-124807587                          | NM_013534:141      | Leprel2    | INSIDE                 | 0.158                                                        | 19.837                         | 760.14             | 15079.30           | 3.141                          | 623.90             | 1959.81            |
| A_68_P28067972 | chr11:100275705-100275749                         | NM_176830:407      | Leprel4    | INSIDE                 | 0.469                                                        | 10.251                         | 1184.43            | 12141.63           | 4.805                          | 1064.28            | 5113.63            |
| A_68_P28067976 | chr11:100276206-100276250                         | NM_176830:-95      | Leprel4    | DIVERGENT_PROMOTER     | 0.504                                                        | 4.752                          | 1108.90            | 5269.69            | 2.397                          | 1022.83            | 2452.00            |
| A_68_P28067969 | chr11:100275377-100275421                         | NM_176830:735      | Leprel4    | INSIDE                 | 0.532                                                        | 4.572                          | 1167.79            | 5339.03            | 2.432                          | 944.53             | 2296.64            |
| A_68_P23156220 | chr4:101320226-101320270                          | NM_175036:-139     | Leprot     | PROMOTER               | 0.358                                                        | 3.895                          | 6581.36            | 25635.68           | 1.396                          | 4816.22            | 6723.82            |
| A_68_P25772430 | chr8:35210035-35210079                            | NM_026609:-263     | Leprot11   | DIVERGENT_PROMOTER     | 0.362                                                        | 4.404                          | 1295.42            | 5704.72            | 1.594                          | 1092.59            | 1741.30            |
| A_68_P23591177 | chr5:34124884-34124928                            | NM_019694:447      | Letm1      | INSIDE                 | 0.527                                                        | 6.020                          | 1675.69            | 10088.25           | 3.175                          | 1278.02            | 4057.78            |
| A_68_P25727984 | chr8:26707935-26707980                            | NM_173012:2        | Letm2      | INSIDE                 | 0.458                                                        | 0.253                          | 5426.56            | 1375.09            | 0.116                          | 3967.34            | 460.52             |
| A_68_P25727982 | chr8:26707741-26707785                            | NM_173012:197      | Letm2      | INSIDE                 | 0.516                                                        | 10.892                         | 1180.03            | 12852.69           | 5.621                          | 1015.89            | 5710.19            |
| A_68_P30485949 | chr15:100299584-100299628                         | NM_134093:142      | Letmd1     | INSIDE                 | 0.446                                                        | 0.426                          | 1453.67            | 618.72             | 0.19                           | 1270.51            | 241.17             |
| A_68_P30485951 | chr15:100299759-100299803                         | NM_134093:316      | Letmd1     | INSIDE                 | 0.597                                                        | 0.306                          | 3279.87            | 1004.91            | 0.183                          | 2418.29            | 442.44             |
| A_68_P30485948 | chr15:100299486-100299530                         | NM_134093:44       | Letmd1     | INSIDE                 | 0.476                                                        | 3.525                          | 2085.36            | 7351.45            | 1.677                          | 1566.54            | 2626.56            |
| A_68_P24142219 | chr5:141083562-141083606                          | NM_008494:290      | Lfnf       | INSIDE                 | 0.563                                                        | 0.663                          | 870.16             | 576.50             | 0.373                          | 738.22             | 275.42             |
| A_68_P29581905 | chr14:47993552-47993596                           | NM_001145953:40    | Lgals3     | INSIDE                 | 0.647                                                        | 4.124                          | 2821.85            | 11637.06           | 2.667                          | 2372.65            | 6326.72            |
| A_68_P23695553 | chr5:52957300-52957344                            | NM_144945:197      | Lgi2       | INSIDE                 | 0.254                                                        | 23.712                         | 6419.20            | 152212.80          | 6.024                          | 5748.51            | 34631.75           |
| A_68_P25034849 | chr7:31852601-31852645                            | NM_144556:7669     | Lgi4       | INSIDE                 | 0.622                                                        | 2.883                          | 1235.29            | 3561.33            | 1.794                          | 1048.81            | 1881.10            |
| A_68_P20637314 | chr1:136982170-136982214                          | NM_001033409:19661 | Lgr6       | INSIDE                 | 0.498                                                        | 0.664                          | 2984.86            | 1980.98            | 0.33                           | 2376.55            | 785.05             |
| A_68_P20637315 | chr1:136982242-136982286                          | NM_001033409:19589 | Lgr6       | INSIDE                 | 0.636                                                        | 3.779                          | 485.63             | 1835.20            | 2.404                          | 426.83             | 1025.91            |
| A_68_P22139473 | chr3:52845232-52845276                            | NM_175386:-214     | Lhfp       | PROMOTER               | 0.314                                                        | 7.474                          | 1788.38            | 13365.59           | 2.349                          | 1407.91            | 3306.98            |
| A_68_P22139474 | chr3:52845318-52845362                            | NM_175386:-128     | Lhfp       | PROMOTER               | 0.488                                                        | 0.333                          | 2414.37            | 804.70             | 0.163                          | 1756.47            | 285.46             |
| A_68_P29232482 | chr13:94827759-94827803                           | NM_172589:30       | Lhfp12     | INSIDE                 | 0.6                                                          | 3.174                          | 800.74             | 2541.60            | 1.903                          | 847.01             | 1611.89            |
| A_68_P23532885 | chr5:22251850-22251894                            | NM_001081231:-138  | Lhfp13     | PROMOTER               | 0.424                                                        | 0.625                          | 875.47             | 546.80             | 0.265                          | 744.84             | 197.25             |
| A_68_P24758100 | chr6:113144398-113144442                          | NM_177763:958      | Lhfp14     | INSIDE                 | 0.223                                                        | 2.280                          | 5603.62            | 12778.98           | 0.508                          | 4208.04            | 2136.49            |
| A_68_P25535615 | chr7:139802512-139802556                          | NM_029609:209      | Lhfp       | INSIDE                 | 0.415                                                        | 0.414                          | 1645.08            | 681.37             | 0.172                          | 1293.10            | 222.05             |
| A_68_P21147688 | chr2:38212213-38212257                            | NM_010710:5407     | Lhx2       | INSIDE                 | 0.38                                                         | 0.246                          | 2624.45            | 644.92             | 0.093                          | 1858.02            | 173.49             |
| A_68_P21147689 | chr2:38212332-38212376                            | NM_010710:5527     | Lhx2       | INSIDE                 | 0.6                                                          | 0.253                          | 2188.33            | 554.17             | 0.152                          | 1694.41            | 257.40             |
| A_68_P21147643 | chr2:38206924-38206968                            | NM_010710:119      | Lhx2       | INSIDE                 | 0.47                                                         | 0.604                          | 1053.39            | 636.05             | 0.284                          | 909.49             | 258.08             |
| A_68_P21077007 | chr2:26058001-26058045                            | NM_001039653:4054  | Lhx3       | INSIDE                 | 0.565                                                        | 0.610                          | 1097.85            | 669.61             | 0.345                          | 733.89             | 253.06             |
| A_68_P20739614 | chr1:157590081-157590125                          | NM_010712:-945     | Lhx4       | PROMOTER               | 0.583                                                        | 0.510                          | 6681.45            | 3405.52            | 0.297                          | 4433.06            | 1316.30            |
| A_68_P20739570 | chr1:157584953-157584997                          | NM_010712:4183     | Lhx4       | INSIDE                 | 0.615                                                        | 0.197                          | 9479.99            | 1870.50            | 0.121                          | 6309.21            | 765.50             |
| A_68_P24038706 | chr5:120886174-120886218                          | NM_008499:4302     | Lhx5       | INSIDE                 | 0.339                                                        | 7.008                          | 1478.06            | 10358.38           | 2.379                          | 1307.77            | 3110.79            |
| A_68_P24038737 | chr5:120890387-120890431                          | NM_008499:8514     | Lhx5       | INSIDE                 | 0.446                                                        | 0.261                          | 2010.22            | 524.76             | 0.116                          | 1471.69            | 171.19             |
| A_68_P24038700 | chr5:120885515-120885559                          | NM_008499:3642     | Lhx5       | INSIDE                 | 0.635                                                        | 0.314                          | 4706.35            | 1475.46            | 0.199                          | 3504.64            | 697.15             |
| A_68_P21137836 | chr2:35960496-35960540                            | NM_001083126:-938  | Lhx6       | PROMOTER               | 0.099                                                        | 4.104                          | 8539.48            | 35044.27           | 0.406                          | 6106.23            | 2477.57            |
| A_68_P21137838 | chr2:35960787-35960831                            | NM_001083126:-1228 | Lhx6       | PROMOTER               | 0.473                                                        | 6.347                          | 1668.93            | 10592.28           | 3.004                          | 1599.57            | 4804.34            |
| A_68_P21137822 | chr2:35958973-35959017                            | NM_001083126:586   | Lhx6       | INSIDE                 | 0.481                                                        | 0.224                          | 2085.71            | 466.64             | 0.108                          | 1626.21            | 175.07             |
| A_68_P21137747 | chr2:35949642-35949686                            | NM_001083126:9916  | Lhx6       | INSIDE                 | 0.571                                                        | 0.185                          | 2641.60            | 487.73             | 0.105                          | 1628.97            | 171.85             |
| A_68_P21137837 | chr2:35960605-35960649                            | NM_001083126:-1046 | Lhx6       | PROMOTER               | 0.475                                                        | 2.859                          | 2960.05            | 8462.42            | 1.359                          | 2480.01            | 3370.41            |
| A_68_P22661977 | chr3:153991290-153991334                          | NM_010713:2212     | Lhx8       | INSIDE                 | 0.505                                                        | 4.801                          | 2818.87            | 13533.70           | 2.426                          | 2300.00            | 5580.56            |
| A_68_P22661990 | chr3:153992513-153992557                          | NM_010713:990      | Lhx8       | INSIDE                 | 0.414                                                        | 0.680                          | 1588.88            | 1080.80            | 0.282                          | 1025.30            | 288.68             |
| A_68_P29992340 | chr15:7079603-7079647                             | NM_001113386:53    | Lifr       | INSIDE                 | 0.261                                                        | 9.644                          | 893.28             | 8615.15            | 2.515                          | 798.79             | 2008.66            |
| A_68_P29992343 | chr15:7080001-7080045                             | NM_001113386:451   | Lifr       | INSIDE                 | 0.109                                                        | 6.046                          | 2283.25            | 13805.45           | 0.658                          | 1626.51            | 1070.81            |
| A_68_P25645821 | chr8:9976314-9976358                              | NM_176953:-13      | Lig4       | DIVERGENT_PROMOTER     | 0.362                                                        | 22.621                         | 7317.00            | 165515.10          | 8.199                          | 8460.67            | 69365.40           |



| ProbeName      | Target position of probe on CpG island microarray | TargetID           | GeneSymbol | CpG island Description | Ratio of relative methylation (TiO <sub>2</sub> -NP/Vehicle) | Sham group                     |                    |                    | TiO <sub>2</sub> -H group      |                    |                    |
|----------------|---------------------------------------------------|--------------------|------------|------------------------|--------------------------------------------------------------|--------------------------------|--------------------|--------------------|--------------------------------|--------------------|--------------------|
|                |                                                   |                    |            |                        |                                                              | Relative methylation (Cy5/Cy3) | Cy3 signal (Input) | Cy5 signal (MeDIP) | Relative methylation (Cy5/Cy3) | Cy3 signal (Input) | Cy5 signal (MeDIP) |
| A_68_P25645820 | chr8:9976227-9976271                              | NM_176953:75       | Lig4       | INSIDE                 | 0.518                                                        | 0.420                          | 3197.44            | 1341.72            | 0.217                          | 2477.51            | 538.84             |
| A_68_P30482737 | chr15:99705642-99705686                           | NM_001113545:223   | Lima1      | INSIDE                 | 0.608                                                        | 5.061                          | 1494.32            | 7562.47            | 3.075                          | 1401.44            | 4310.01            |
| A_68_P23763603 | chr5:67136839-67136883                            | NM_001001980:-218  | Limch1     | PROMOTER               | 0.251                                                        | 21.113                         | 1520.74            | 32107.16           | 5.302                          | 1307.08            | 6929.68            |
| A_68_P23763606 | chr5:67137204-67137248                            | NM_001001980:148   | Limch1     | INSIDE                 | 0.66                                                         | 0.608                          | 758.18             | 461.00             | 0.402                          | 717.05             | 287.90             |
| A_68_P24112797 | chr5:135164410-135164454                          | NM_010717:28       | Limk1      | INSIDE                 | 0.405                                                        | 3.706                          | 1361.24            | 5044.90            | 1.501                          | 1100.44            | 1652.15            |
| A_68_P27163123 | chr10:57786395-57786439                           | NM_026148:203      | Lims1      | INSIDE                 | 0.202                                                        | 15.351                         | 2405.51            | 36927.26           | 3.1                            | 2455.49            | 7611.64            |
| A_68_P27163122 | chr10:57786302-57786346                           | NM_026148:111      | Lims1      | INSIDE                 | 0.611                                                        | 5.131                          | 802.49             | 4117.90            | 3.136                          | 665.99             | 2088.38            |
| A_68_P23929939 | chr5:100929613-100929657                          | NM_001115010:-2042 | Lin54      | PROMOTER               | 0.204                                                        | 14.516                         | 2417.70            | 35094.18           | 2.955                          | 2088.35            | 6171.33            |
| A_68_P25092719 | chr7:52625927-52625971                            | NM_011698:-14      | Lin7b      | PROMOTER               | 0.478                                                        | 4.640                          | 3331.18            | 15456.06           | 2.22                           | 2764.31            | 6136.33            |
| A_68_P25092718 | chr7:52625828-52625872                            | NM_011698:84       | Lin7b      | INSIDE                 | 0.612                                                        | 0.585                          | 9089.15            | 5319.05            | 0.358                          | 6555.24            | 2349.11            |
| A_68_P20877047 | chr1:182571834-182571878                          | NM_175186:392      | Lin9       | INSIDE                 | 0.472                                                        | 8.571                          | 583.51             | 5001.08            | 4.043                          | 447.99             | 1811.24            |
| A_68_P20877048 | chr1:182571948-182571992                          | NM_175186:506      | Lin9       | INSIDE                 | 0.511                                                        | 0.416                          | 1065.92            | 443.04             | 0.212                          | 876.73             | 186.20             |
| A_68_P26537382 | chr9:56483766-56483810                            | NM_181074:49272    | Lingo1     | INSIDE                 | 0.283                                                        | 7.696                          | 3256.56            | 25061.48           | 2.181                          | 3258.69            | 7107.66            |
| A_68_P26537258 | chr9:56467405-56467449                            | NM_181074:65634    | Lingo1     | INSIDE                 | 0.284                                                        | 11.987                         | 2295.73            | 27518.58           | 3.401                          | 1478.74            | 5028.59            |
| A_68_P26537259 | chr9:56467537-56467581                            | NM_181074:65502    | Lingo1     | INSIDE                 | 0.347                                                        | 6.905                          | 2802.13            | 19350.00           | 2.393                          | 1961.27            | 4693.39            |
| A_68_P22843572 | chr4:36897429-36897473                            | NM_001165999:1327  | Lingo2     | INSIDE                 | 0.611                                                        | 0.678                          | 1692.51            | 1146.94            | 0.414                          | 1366.16            | 565.62             |
| A_68_P25010077 | chr7:26164977-26165021                            | NM_001039507:10127 | Lipe       | INSIDE                 | 0.163                                                        | 18.894                         | 2490.30            | 47052.76           | 3.084                          | 2028.76            | 6256.06            |
| A_68_P25010203 | chr7:26181112-26181156                            | NM_010719:-128     | Lipe       | PROMOTER               | 0.297                                                        | 5.703                          | 3113.46            | 17756.42           | 1.693                          | 2663.24            | 4509.22            |
| A_68_P25010202 | chr7:26180987-26181031                            | NM_010719:-2       | Lipe       | PROMOTER               | 0.414                                                        | 8.888                          | 4038.52            | 35893.13           | 3.679                          | 3660.94            | 13467.10           |
| A_68_P20156379 | chr1:37932274-37932318                            | NM_001037918:3246  | Lipt1      | INSIDE                 | 0.207                                                        | 8.305                          | 1628.04            | 13521.32           | 1.716                          | 1121.49            | 1924.64            |
| A_68_P22350154 | chr3:96405147-96405191                            | NM_001163170:113   | Lix1       | INSIDE                 | 0.446                                                        | 1.459                          | 2985.64            | 4355.04            | 0.65                           | 2395.75            | 1558.21            |
| A_68_P28155817 | chr11:115719757-115719801                         | NM_145438:34407    | Llgl2      | DOWNSTREAM             | 0.523                                                        | 0.451                          | 1056.04            | 476.63             | 0.236                          | 857.06             | 202.43             |
| A_68_P28155824 | chr11:115720427-115720471                         | NM_145438:35077    | Llgl2      | DOWNSTREAM             | 0.526                                                        | 0.505                          | 2227.88            | 1125.69            | 0.266                          | 1524.34            | 404.75             |
| A_68_P28155559 | chr11:115685801-115685845                         | NM_145438:451      | Llgl2      | INSIDE                 | 0.533                                                        | 0.420                          | 2850.18            | 1198.05            | 0.224                          | 2092.28            | 468.57             |
| A_68_P27495998 | chr10:119664180-119664224                         | NM_025431:87       | Llph       | INSIDE                 | 0.543                                                        | 0.463                          | 1448.90            | 671.41             | 0.252                          | 1034.77            | 260.46             |
| A_68_P31784507 | chr18:66162242-66162286                           | NM_027400:25       | Lman1      | INSIDE                 | 0.374                                                        | 5.215                          | 1332.00            | 6946.77            | 1.953                          | 1259.87            | 2460.42            |
| A_68_P20148354 | chr1:36501974-36502018                            | NM_001013374:88    | Lman2l     | INSIDE                 | 0.226                                                        | 0.499                          | 7468.27            | 3727.18            | 0.113                          | 5000.20            | 564.40             |
| A_68_P20148355 | chr1:36502065-36502109                            | NM_001013374:-2    | Lman2l     | PROMOTER               | 0.429                                                        | 6.857                          | 7851.19            | 53835.34           | 2.941                          | 5664.76            | 16662.73           |
| A_68_P20148353 | chr1:36501896-36501940                            | NM_001013374:166   | Lman2l     | INSIDE                 | 0.464                                                        | 0.340                          | 2293.34            | 778.85             | 0.158                          | 1754.38            | 276.60             |
| A_68_P23567296 | chr5:29704564-29704608                            | NM_020295:344      | Lmbr1      | INSIDE                 | 0.435                                                        | 0.501                          | 3897.45            | 1951.08            | 0.218                          | 2799.72            | 609.67             |
| A_68_P23567299 | chr5:29704950-29704994                            | NM_020295:-42      | Lmbr1      | PROMOTER               | 0.627                                                        | 0.432                          | 1311.24            | 566.30             | 0.271                          | 1119.30            | 303.32             |
| A_68_P30477336 | chr15:98748107-98748151                           | NM_029098:401      | Lmbr1l     | INSIDE                 | 0.574                                                        | 3.246                          | 1588.21            | 5155.56            | 1.864                          | 1339.28            | 2496.12            |
| A_68_P20094994 | chr1:24685459-24685503                            | NM_026719:98       | Lmbrd1     | INSIDE                 | 0.218                                                        | 91.869                         | 3001.82            | 275773.00          | 20.013                         | 3259.09            | 65225.73           |
| A_68_P30656039 | chr16:33062880-33062924                           | NM_172823:296      | Lmln       | INSIDE                 | 0.191                                                        | 0.609                          | 2846.06            | 1733.93            | 0.116                          | 2108.32            | 244.99             |
| A_68_P22314130 | chr3:88306601-88306645                            | NM_019390:-9401    | Lmna       | PROMOTER               | 0.573                                                        | 0.483                          | 2310.36            | 1115.81            | 0.277                          | 1689.08            | 467.45             |
| A_68_P31731708 | chr18:56868611-56868655                           | NM_010721:1166     | Lmnb1      | INSIDE                 | 0.415                                                        | 0.238                          | 2453.40            | 583.19             | 0.099                          | 1768.13            | 174.31             |
| A_68_P31731697 | chr18:56867382-56867426                           | NM_010721:-62      | Lmnb1      | PROMOTER               | 0.645                                                        | 3.522                          | 634.40             | 2234.67            | 2.272                          | 700.03             | 1590.76            |
| A_68_P27286341 | chr10:80380635-80380679                           | NM_010722:334      | Lmnb2      | INSIDE                 | 0.656                                                        | 0.425                          | 1675.54            | 712.62             | 0.279                          | 1245.15            | 347.59             |
| A_68_P22601420 | chr3:143865390-143865434                          | NM_001161769:-52   | Lmo4       | PROMOTER               | 0.305                                                        | 13.562                         | 6965.17            | 94461.32           | 4.134                          | 5745.36            | 23751.89           |
| A_68_P22601440 | chr3:143867896-143867940                          | NM_001161769:-2558 | Lmo4       | PROMOTER               | 0.374                                                        | 7.263                          | 4736.97            | 34403.52           | 2.716                          | 3483.88            | 9462.06            |
| A_68_P29856570 | chr14:102129092-102129136                         | NM_201529:-30      | Lmo7       | PROMOTER               | 0.334                                                        | 0.559                          | 1464.54            | 818.17             | 0.187                          | 1215.21            | 227.08             |
| A_68_P24159372 | chr5:144861058-144861106                          | NM_001081109:-222  | Lmtk2      | PROMOTER               | 0.51                                                         | 4.691                          | 1566.54            | 7348.48            | 2.394                          | 1369.91            | 3279.40            |
| A_68_P24159378 | chr5:144861753-144861797                          | NM_001081109:470   | Lmtk2      | INSIDE                 | 0.349                                                        | 1.371                          | 2363.34            | 3240.54            | 0.478                          | 1891.31            | 904.22             |
| A_68_P20806523 | chr1:169619018-169619062                          | NM_033652:-648     | Lmx1a      | PROMOTER               | 0.359                                                        | 6.936                          | 1652.18            | 11459.28           | 2.487                          | 1309.48            | 3257.03            |
| A_68_P21122756 | chr2:33495852-33495899                            | NM_010725:156      | Lmx1b      | INSIDE                 | 0.539                                                        | 4.191                          | 724.55             | 3036.50            | 2.258                          | 678.28             | 1531.66            |
| A_68_P21122760 | chr2:33496334-33496378                            | NM_010725:-325     | Lmx1b      | PROMOTER               | 0.604                                                        | 4.163                          | 1475.40            | 6141.44            | 2.516                          | 1316.81            | 3312.90            |

| ProbeName      | Target position of probe on CpG island microarray | TargetID           | GeneSymbol   | CpG island Description | Ratio of relative methylation (TiO <sub>2</sub> -NP/Vehicle) | Sham group                     |                    |                    | TiO <sub>2</sub> -H group      |                    |                    |
|----------------|---------------------------------------------------|--------------------|--------------|------------------------|--------------------------------------------------------------|--------------------------------|--------------------|--------------------|--------------------------------|--------------------|--------------------|
|                |                                                   |                    |              |                        |                                                              | Relative methylation (Cy5/Cy3) | Cy3 signal (Input) | Cy5 signal (MeDIP) | Relative methylation (Cy5/Cy3) | Cy3 signal (Input) | Cy5 signal (MeDIP) |
| A_68_P21338178 | chr2:74416574-74416618                            | NM_001110209:409   | Lnp          | INSIDE                 | 0.453                                                        | 0.351                          | 1342.69            | 470.68             | 0.159                          | 1064.19            | 169.06             |
| A_68_P31074422 | chr17:17761131-17761175                           | NM_172827:301      | Lnp          | INSIDE                 | 0.334                                                        | 0.246                          | 3460.67            | 852.77             | 0.082                          | 2372.90            | 195.44             |
| A_68_P24171753 | chr5:147888406-147888450                          | NM_080795:-280     | Lnx2         | DIVERGENT_PROMOTER     | 0.261                                                        | 10.128                         | 8346.79            | 84535.60           | 2.639                          | 6768.30            | 17862.45           |
| A_68_P24171749 | chr5:147887960-147888004                          | NM_080795:166      | Lnx2         | INSIDE                 | 0.505                                                        | 5.432                          | 1903.82            | 10341.25           | 2.745                          | 1674.73            | 4597.20            |
| A_68_P25021326 | chr7:29135937-29135981                            | NR_028129:-600     | LOC100302567 | PROMOTER               | 0.656                                                        | 0.628                          | 2196.37            | 1378.97            | 0.412                          | 1729.26            | 711.70             |
| A_68_P30347565 | chr15:76157913-76157957                           | NR_028283:29       | LOC100302626 | INSIDE                 | 0.484                                                        | 0.598                          | 1248.85            | 747.00             | 0.29                           | 1103.04            | 319.52             |
| A_68_P30512787 | chr16:4939335-4939379                             | NR_037666:229      | LOC100503704 | INSIDE                 | 0.637                                                        | 0.343                          | 6087.73            | 2085.69            | 0.218                          | 3904.97            | 851.66             |
| A_68_P27533642 | chr10:126478457-126478501                         | NM_001205036:-28   | LOC100504608 | DIVERGENT_PROMOTER     | 0.548                                                        | 6.109                          | 2582.96            | 15780.57           | 3.346                          | 1930.12            | 6458.34            |
| A_68_P26445384 | chr9:40609412-40609456                            | NR_015570:-3251    | LOC624853    | PROMOTER               | 0.418                                                        | 0.312                          | 3914.52            | 1221.81            | 0.13                           | 2473.95            | 322.53             |
| A_68_P24862701 | chr6:134591261-134591305                          | NM_026371:325      | Loh12cr1     | INSIDE                 | 0.414                                                        | 5.341                          | 1209.36            | 6458.72            | 2.209                          | 1138.20            | 2514.37            |
| A_68_P31708185 | chr18:52688188-52688232                           | NM_010728:1152     | Lox          | INSIDE                 | 0.242                                                        | 1.429                          | 3874.34            | 5537.06            | 0.345                          | 2975.55            | 1027.80            |
| A_68_P26547031 | chr9:58159806-58159850                            | NM_010729:1191     | Lox1         | INSIDE                 | 0.193                                                        | 2.275                          | 2297.87            | 5227.04            | 0.439                          | 1775.89            | 779.51             |
| A_68_P26547037 | chr9:58160685-58160729                            | NM_010729:313      | Lox1         | INSIDE                 | 0.509                                                        | 8.306                          | 860.28             | 7145.57            | 4.232                          | 775.53             | 3281.83            |
| A_68_P29696151 | chr14:70009216-70009260                           | NM_033325:-44      | Lox12        | PROMOTER               | 0.61                                                         | 0.450                          | 2552.86            | 1148.39            | 0.274                          | 1881.60            | 516.49             |
| A_68_P29696148 | chr14:70008926-70008970                           | NM_033325:-334     | Lox12        | PROMOTER               | 0.085                                                        | 1.372                          | 3270.31            | 4487.18            | 0.117                          | 2383.69            | 278.41             |
| A_68_P32122315 | chr19:42687286-42687330                           | NM_001164311:-12   | Lox14        | PROMOTER               | 0.143                                                        | 29.923                         | 2275.04            | 68076.62           | 4.281                          | 1945.35            | 8327.81            |
| A_68_P22951804 | chr4:58566187-58566231                            | NM_172989:-43      | Lpar1        | PROMOTER               | 0.465                                                        | 28.499                         | 1857.66            | 52941.65           | 13.259                         | 1608.59            | 21328.25           |
| A_68_P22951806 | chr4:58566399-58566443                            | NM_010336:-57      | Lpar1        | PROMOTER               | 0.566                                                        | 0.436                          | 3628.95            | 1581.88            | 0.247                          | 2707.67            | 667.52             |
| A_68_P22951801 | chr4:58565861-58565905                            | NM_172989:283      | Lpar1        | INSIDE                 | 0.617                                                        | 0.698                          | 1198.78            | 837.11             | 0.431                          | 906.91             | 391.00             |
| A_68_P22613734 | chr3:145947914-145947958                          | NM_022983:64012    | Lpar3        | INSIDE                 | 0.173                                                        | 9.703                          | 1884.45            | 18283.99           | 1.678                          | 1549.21            | 2599.18            |
| A_68_P24818549 | chr6:125031882-125031926                          | NM_001163268:10610 | Lpar5        | INSIDE                 | 0.398                                                        | 0.628                          | 907.02             | 569.49             | 0.25                           | 678.96             | 169.71             |
| A_68_P29140001 | chr13:73605046-73605090                           | NM_145376:238      | Lpcat1       | INSIDE                 | 0.135                                                        | 24.310                         | 4515.67            | 109775.90          | 3.275                          | 4125.66            | 13512.63           |
| A_68_P26068285 | chr8:95379185-95379229                            | NM_173014:-42      | Lpcat2       | PROMOTER               | 0.64                                                         | 10.461                         | 2816.51            | 29462.88           | 6.694                          | 2570.22            | 17204.16           |
| A_68_P24816267 | chr6:124612992-124613036                          | NM_145130:-107     | Lpcat3       | PROMOTER               | 0.291                                                        | 6.859                          | 5590.52            | 38343.38           | 1.999                          | 5177.33            | 10348.96           |
| A_68_P24816271 | chr6:124613291-124613335                          | NM_145130:191      | Lpcat3       | INSIDE                 | 0.371                                                        | 0.150                          | 4489.72            | 674.18             | 0.056                          | 3161.30            | 175.96             |
| A_68_P20939666 | chr1:193542578-193542622                          | NM_001134829:327   | Lpgat1       | INSIDE                 | 0.309                                                        | 6.568                          | 1479.44            | 9716.82            | 2.031                          | 1499.71            | 3046.33            |
| A_68_P20939662 | chr1:193541860-193541904                          | NM_172266:-20      | Lpgat1       | PROMOTER               | 0.538                                                        | 4.272                          | 997.11             | 4259.60            | 2.298                          | 957.52             | 2200.43            |
| A_68_P26016967 | chr8:86424037-86424081                            | NM_181039:62       | Lphn1        | INSIDE                 | 0.239                                                        | 13.664                         | 2200.08            | 30060.83           | 3.262                          | 1840.35            | 6002.37            |
| A_68_P26016964 | chr8:86423687-86423732                            | NM_181039:-287     | Lphn1        | PROMOTER               | 0.623                                                        | 0.181                          | 3917.41            | 708.75             | 0.113                          | 2824.93            | 318.62             |
| A_68_P23837529 | chr5:81450446-81450490                            | NM_198702:-149     | Lphn3        | PROMOTER               | 0.241                                                        | 1.934                          | 4911.69            | 9501.65            | 0.466                          | 3588.94            | 1673.47            |
| A_68_P23837533 | chr5:81450893-81450938                            | NM_198702:298      | Lphn3        | INSIDE                 | 0.371                                                        | 0.258                          | 2807.16            | 723.66             | 0.096                          | 1819.39            | 173.90             |
| A_68_P23837522 | chr5:81449591-81449635                            | NM_198702:-1005    | Lphn3        | PROMOTER               | 0.455                                                        | 9.254                          | 1760.99            | 16296.12           | 4.21                           | 1538.61            | 6477.68            |
| A_68_P23837517 | chr5:81448669-81448713                            | NM_198702:-1927    | Lphn3        | PROMOTER               | 0.57                                                         | 3.298                          | 829.46             | 2735.66            | 1.879                          | 763.93             | 1435.57            |
| A_68_P23839618 | chr5:81758787-81758831                            | NM_198702:308191   | Lphn3        | INSIDE                 | 0.65                                                         | 2.366                          | 1467.51            | 3472.65            | 1.538                          | 1171.30            | 1801.91            |
| A_68_P25945210 | chr8:71405256-71405300                            | NM_008509:825      | Lpl          | INSIDE                 | 0.539                                                        | 0.475                          | 2293.81            | 1090.18            | 0.256                          | 1900.05            | 486.62             |
| A_68_P27996402 | chr11:87630757-87630801                           | NM_080420:8838     | Lpo          | INSIDE                 | 0.402                                                        | 6.448                          | 2215.84            | 14287.79           | 2.594                          | 1939.32            | 5029.74            |
| A_68_P22301528 | chr3:86028273-86028317                            | NM_001077687:-317  | Lrba         | PROMOTER               | 0.564                                                        | 6.070                          | 796.06             | 4832.22            | 3.426                          | 692.63             | 2372.97            |
| A_68_P22301529 | chr3:86028379-86028423                            | NM_001077687:-211  | Lrba         | PROMOTER               | 0.64                                                         | 0.236                          | 2156.75            | 509.86             | 0.151                          | 1729.16            | 261.64             |
| A_68_P32730437 | chrX:143988143-143988187                          | NM_001081173:460   | Lrch2        | INSIDE                 | 0.31                                                         | 11.471                         | 7108.66            | 81543.79           | 3.555                          | 7613.44            | 27062.05           |
| A_68_P30655247 | chr16:32914173-32914217                           | NM_001081255:9     | Lrch3        | INSIDE                 | 0.098                                                        | 2.805                          | 1686.32            | 4729.57            | 0.274                          | 1457.09            | 399.30             |
| A_68_P24126717 | chr5:138070748-138070792                          | NM_001168652:420   | Lrch4        | INSIDE                 | 0.483                                                        | 0.320                          | 3778.42            | 1210.53            | 0.155                          | 2657.87            | 411.25             |
| A_68_P25021976 | chr7:29237431-29237475                            | NM_001141921:196   | Lrhn1        | INSIDE                 | 0.102                                                        | 6.594                          | 7481.67            | 49337.40           | 0.673                          | 5569.13            | 3750.77            |
| A_68_P31220008 | chr17:49071618-49071662                           | NM_027452:-266     | Lrhn2        | PROMOTER               | 0.169                                                        | 31.137                         | 5792.05            | 180346.20          | 5.273                          | 7865.26            | 41473.44           |
| A_68_P31220014 | chr17:49072235-49072279                           | NM_027452:350      | Lrhn2        | INSIDE                 | 0.405                                                        | 0.384                          | 1474.77            | 566.54             | 0.156                          | 1102.24            | 171.59             |
| A_68_P31220004 | chr17:49070978-49071022                           | NM_027452:-906     | Lrhn2        | PROMOTER               | 0.445                                                        | 5.276                          | 3529.11            | 18618.44           | 2.35                           | 2680.59            | 6298.91            |
| A_68_P25031213 | chr7:31145836-31145880                            | NM_175478:1933     | Lrhn3        | INSIDE                 | 0.306                                                        | 21.868                         | 2305.52            | 50417.28           | 6.695                          | 1828.93            | 12244.41           |

| ProbeName      | Target position of probe on CpG island microarray | TargetID         | GeneSymbol | CpG island Description | Ratio of relative methylation (TiO <sub>2</sub> -NP/Vehicle) | Sham group                     |                    |                    | TiO <sub>2</sub> -H group      |                    |                    |
|----------------|---------------------------------------------------|------------------|------------|------------------------|--------------------------------------------------------------|--------------------------------|--------------------|--------------------|--------------------------------|--------------------|--------------------|
|                |                                                   |                  |            |                        |                                                              | Relative methylation (Cy5/Cy3) | Cy3 signal (Input) | Cy5 signal (MeDIP) | Relative methylation (Cy5/Cy3) | Cy3 signal (Input) | Cy5 signal (MeDIP) |
| A_68_P25031211 | chr7:31145626-31145670                            | NM_175478:2143   | Lrfn3      | INSIDE                 | 0.472                                                        | 5.103                          | 1554.60            | 7933.87            | 2.411                          | 1049.26            | 2529.57            |
| A_68_P28480019 | chr12:62623999-62624043                           | NM_178714:-1598  | Lrfn5      | PROMOTER               | 0.189                                                        | 0.635                          | 2124.17            | 1349.23            | 0.12                           | 1427.21            | 171.46             |
| A_68_P28480018 | chr12:62623914-62623958                           | NM_178714:-1682  | Lrfn5      | PROMOTER               | 0.621                                                        | 0.662                          | 1690.07            | 1119.24            | 0.411                          | 1292.42            | 531.60             |
| A_68_P22391858 | chr3:104315425-104315469                          | NM_001025067:333 | Lrig2      | INSIDE                 | 0.3                                                          | 14.553                         | 663.70             | 9658.50            | 4.371                          | 537.12             | 2347.84            |
| A_68_P27528046 | chr10:125403373-125403417                         | NM_177152:120    | Lrig3      | INSIDE                 | 0.539                                                        | 5.542                          | 1610.37            | 8924.70            | 2.988                          | 1399.07            | 4180.43            |
| A_68_P27528047 | chr10:125403454-125403498                         | NM_177152:202    | Lrig3      | INSIDE                 | 0.178                                                        | 8.287                          | 1384.08            | 11470.44           | 1.475                          | 1232.79            | 1818.71            |
| A_68_P27537125 | chr10:127058908-127058952                         | NM_008512:-726   | Lrp1       | PROMOTER               | 0.323                                                        | 13.451                         | 2712.02            | 36479.67           | 4.34                           | 2732.90            | 11861.63           |
| A_68_P27537124 | chr10:127058798-127058842                         | NM_008512:-616   | Lrp1       | PROMOTER               | 0.187                                                        | 7.885                          | 5013.78            | 39532.69           | 1.477                          | 4128.01            | 6095.19            |
| A_68_P29612551 | chr14:55083412-55083456                           | NM_022993:451    | Lrp10      | INSIDE                 | 0.132                                                        | 1.881                          | 2456.32            | 4621.55            | 0.248                          | 1764.35            | 438.01             |
| A_68_P29612547 | chr14:55083035-55083079                           | NM_022993:73     | Lrp10      | INSIDE                 | 0.505                                                        | 4.300                          | 673.63             | 2896.69            | 2.173                          | 636.70             | 1383.58            |
| A_68_P30156691 | chr15:39775111-39775155                           | NM_172814:171    | Lrp12      | INSIDE                 | 0.21                                                         | 53.975                         | 1015.59            | 54816.81           | 11.32                          | 975.29             | 11040.61           |
| A_68_P31918778 | chr19:3685913-3685957                             | NM_008513:630    | Lrp5       | INSIDE                 | 0.486                                                        | 0.634                          | 718.49             | 455.63             | 0.308                          | 564.86             | 174.17             |
| A_68_P23192848 | chr4:107475278-107475322                          | NM_001080926:437 | Lrp8       | INSIDE                 | 0.628                                                        | 2.490                          | 1142.64            | 2844.65            | 1.564                          | 863.30             | 1350.61            |
| A_68_P23598368 | chr5:35448526-35448576                            | NM_013587:-204   | Lrpap1     | PROMOTER               | 0.544                                                        | 0.383                          | 1276.91            | 488.84             | 0.208                          | 831.61             | 173.29             |
| A_68_P23598365 | chr5:35448131-35448175                            | NM_013587:194    | Lrpap1     | INSIDE                 | 0.602                                                        | 0.487                          | 1297.03            | 631.92             | 0.293                          | 943.89             | 276.86             |
| A_68_P31950785 | chr19:10531094-10531138                           | NM_001111140:821 | Lrrc10b    | INSIDE                 | 0.643                                                        | 3.153                          | 1144.95            | 3610.39            | 2.028                          | 956.13             | 1938.94            |
| A_68_P28886522 | chr13:24373081-24373125                           | NM_026825:-443   | Lrrc16a    | PROMOTER               | 0.273                                                        | 11.659                         | 1692.30            | 19731.23           | 3.177                          | 1473.71            | 4682.57            |
| A_68_P28886519 | chr13:24372543-24372587                           | NM_026825:95     | Lrrc16a    | INSIDE                 | 0.472                                                        | 0.312                          | 1704.62            | 531.38             | 0.147                          | 1198.61            | 176.50             |
| A_68_P28886518 | chr13:24372431-24372475                           | NM_026825:207    | Lrrc16a    | INSIDE                 | 0.524                                                        | 0.136                          | 8062.33            | 1095.20            | 0.071                          | 4901.77            | 348.67             |
| A_68_P28886516 | chr13:24372229-24372273                           | NM_026825:409    | Lrrc16a    | INSIDE                 | 0.383                                                        | 0.588                          | 1796.59            | 1056.54            | 0.225                          | 1450.37            | 326.60             |
| A_68_P29618044 | chr14:56110165-56110209                           | NM_001024645:257 | Lrrc16b    | INSIDE                 | 0.438                                                        | 5.185                          | 4024.82            | 20867.27           | 2.27                           | 3288.96            | 7465.00            |
| A_68_P27180700 | chr10:60938374-60938418                           | NM_153542:-184   | Lrrc20     | PROMOTER               | 0.516                                                        | 0.417                          | 1469.37            | 612.24             | 0.215                          | 1036.86            | 222.92             |
| A_68_P27180702 | chr10:60938602-60938646                           | NM_153542:44     | Lrrc20     | INSIDE                 | 0.2                                                          | 9.011                          | 1478.95            | 13326.77           | 1.803                          | 1194.90            | 2153.95            |
| A_68_P30350212 | chr15:76553038-76553082                           | NM_198119:-457   | Lrrc24     | PROMOTER               | 0.349                                                        | 0.470                          | 1354.51            | 637.02             | 0.164                          | 1066.14            | 174.76             |
| A_68_P30350167 | chr15:76546156-76546200                           | NM_198119:6425   | Lrrc24     | INSIDE                 | 0.437                                                        | 0.528                          | 938.97             | 496.14             | 0.231                          | 720.09             | 166.16             |
| A_68_P25194961 | chr7:74790016-74790060                            | NM_175124:84     | Lrrc28     | INSIDE                 | 0.639                                                        | 0.478                          | 1833.84            | 877.09             | 0.306                          | 1377.77            | 421.07             |
| A_68_P26133049 | chr8:107850154-107850198                          | NM_177449:0      | Lrrc29     | INSIDE                 | 0.158                                                        | 17.564                         | 1173.39            | 20608.99           | 2.779                          | 1057.87            | 2940.29            |
| A_68_P27270908 | chr10:77365226-77365270                           | NM_145152:33     | Lrrc3      | INSIDE                 | 0.149                                                        | 4.160                          | 4975.53            | 20698.02           | 0.621                          | 3717.96            | 2309.54            |
| A_68_P30651244 | chr16:32165418-32165462                           | NM_146069:122    | Lrrc33     | INSIDE                 | 0.235                                                        | 1.511                          | 3321.92            | 5017.82            | 0.355                          | 2390.74            | 848.31             |
| A_68_P23374714 | chr4:142940380-142940424                          | NM_001162983:750 | Lrrc38     | INSIDE                 | 0.636                                                        | 0.625                          | 947.67             | 592.09             | 0.398                          | 758.50             | 301.62             |
| A_68_P24322963 | chr6:28783645-28783689                            | NM_138682:-1919  | Lrrc4      | PROMOTER               | 0.199                                                        | 15.176                         | 1598.75            | 24263.15           | 3.014                          | 1587.56            | 4784.47            |
| A_68_P24322961 | chr6:28783190-28783234                            | NM_138682:-1465  | Lrrc4      | PROMOTER               | 0.577                                                        | 5.045                          | 513.03             | 2587.96            | 2.909                          | 462.52             | 1345.49            |
| A_68_P23227558 | chr4:115748182-115748226                          | NM_153521:135    | Lrrc41     | INSIDE                 | 0.253                                                        | 10.390                         | 1573.01            | 16344.11           | 2.628                          | 1402.84            | 3686.16            |
| A_68_P23189554 | chr4:106926184-106926228                          | NM_029985:-68    | Lrrc42     | DIVERGENT_PROMOTER     | 0.406                                                        | 0.483                          | 6893.85            | 3332.12            | 0.196                          | 4926.58            | 965.73             |
| A_68_P23189553 | chr4:106926047-106926091                          | NM_029985:70     | Lrrc42     | INSIDE                 | 0.361                                                        | 4.000                          | 1986.40            | 7946.22            | 1.442                          | 1682.91            | 2427.23            |
| A_68_P25087548 | chr7:51717376-51717420                            | NM_198250:19542  | Lrrc4b     | INSIDE                 | 0.322                                                        | 7.388                          | 1204.34            | 8897.81            | 2.379                          | 824.06             | 1960.15            |
| A_68_P25587300 | chr7:148380302-148380347                          | NM_153777:-717   | Lrrc56     | PROMOTER               | 0.549                                                        | 0.174                          | 3251.25            | 566.68             | 0.096                          | 2122.23            | 203.08             |
| A_68_P30682957 | chr16:37868699-37868743                           | NM_177093:235    | Lrrc58     | INSIDE                 | 0.563                                                        | 4.357                          | 1393.57            | 6072.36            | 2.451                          | 1145.49            | 2807.84            |
| A_68_P28033987 | chr11:94490892-94490936                           | NM_133807:-223   | Lrrc59     | PROMOTER               | 0.409                                                        | 0.284                          | 1932.60            | 548.17             | 0.116                          | 1498.38            | 173.85             |
| A_68_P28033988 | chr11:94491055-94491099                           | NM_133807:-61    | Lrrc59     | PROMOTER               | 0.431                                                        | 0.482                          | 1058.25            | 509.84             | 0.208                          | 826.90             | 171.72             |
| A_68_P29726036 | chr14:75530896-75530940                           | NM_027581:-228   | Lrrc63     | DIVERGENT_PROMOTER     | 0.516                                                        | 0.531                          | 1105.93            | 587.80             | 0.274                          | 1023.69            | 280.96             |
| A_68_P24994044 | chr7:20147793-20147837                            | NM_199149:-67    | Lrrc68     | PROMOTER               | 0.562                                                        | 0.280                          | 1825.32            | 511.77             | 0.158                          | 1532.01            | 241.53             |
| A_68_P24993843 | chr7:20118011-20118055                            | NM_199149:29715  | Lrrc68     | INSIDE                 | 0.344                                                        | 5.232                          | 1150.64            | 6020.66            | 1.797                          | 849.76             | 1527.31            |
| A_68_P22686351 | chr3:158224713-158224757                          | NM_001081358:451 | Lrrc7      | INSIDE                 | 0.395                                                        | 0.625                          | 1538.12            | 961.57             | 0.247                          | 1311.36            | 324.16             |
| A_68_P21102112 | chr2:30112106-30112150                            | NM_177725:18840  | Lrrc8a     | INSIDE                 | 0.646                                                        | 3.503                          | 723.21             | 2533.17            | 2.261                          | 556.17             | 1257.66            |
| A_68_P23955154 | chr5:105844706-105844750                          | NM_001033550:-65 | Lrrc8b     | PROMOTER               | 0.293                                                        | 10.790                         | 244.10             | 2633.90            | 3.166                          | 270.86             | 857.46             |

| ProbeName      | Target position of probe on CpG island microarray | TargetID           | GeneSymbol | CpG island Description | Ratio of relative methylation (TiO <sub>2</sub> -NP/Vehicle) | Sham group                     |                    |                    | TiO <sub>2</sub> -H group      |                    |                    |
|----------------|---------------------------------------------------|--------------------|------------|------------------------|--------------------------------------------------------------|--------------------------------|--------------------|--------------------|--------------------------------|--------------------|--------------------|
|                |                                                   |                    |            |                        |                                                              | Relative methylation (Cy5/Cy3) | Cy3 signal (Input) | Cy5 signal (MeDIP) | Relative methylation (Cy5/Cy3) | Cy3 signal (Input) | Cy5 signal (MeDIP) |
| A_68_P23956789 | chr5:106129618-106129662                          | NM_178701:-188     | Lrrc8d     | PROMOTER               | 0.517                                                        | 0.345                          | 4166.85            | 1436.84            | 0.178                          | 2464.70            | 439.30             |
| A_68_P23956961 | chr5:106161428-106161472                          | NM_178701:31622    | Lrrc8d     | INSIDE                 | 0.17                                                         | 1.415                          | 5582.70            | 7897.24            | 0.24                           | 3824.84            | 919.71             |
| A_68_P20440041 | chr1:92949532-92949576                            | NM_001111311:-466  | Lrrfip1    | PROMOTER               | 0.404                                                        | 0.404                          | 1372.48            | 555.05             | 0.164                          | 1069.44            | 174.86             |
| A_68_P20440043 | chr1:92949729-92949773                            | NM_001111311:-270  | Lrrfip1    | PROMOTER               | 0.564                                                        | 0.455                          | 2119.83            | 965.49             | 0.257                          | 1753.18            | 450.11             |
| A_68_P26827666 | chr9:111020550-111020594                          | NM_001164838:-42   | Lrrfip2    | PROMOTER               | 0.304                                                        | 16.611                         | 3524.23            | 58539.49           | 5.047                          | 3153.52            | 15916.71           |
| A_68_P25187997 | chr7:73532946-73532990                            | NM_146191:259      | Lrrk1      | INSIDE                 | 0.493                                                        | 3.768                          | 3158.28            | 11900.54           | 1.856                          | 2715.44            | 5040.95            |
| A_68_P25187993 | chr7:73532543-73532587                            | NM_146191:663      | Lrrk1      | INSIDE                 | 0.532                                                        | 3.248                          | 3581.61            | 11632.99           | 1.727                          | 3114.01            | 5377.04            |
| A_68_P24728933 | chr6:107479987-107480031                          | NM_008516:289      | Lrrm1      | INSIDE                 | 0.507                                                        | 0.528                          | 2795.65            | 1475.24            | 0.268                          | 1837.82            | 491.70             |
| A_68_P24728936 | chr6:107480232-107480276                          | NM_008516:535      | Lrrm1      | INSIDE                 | 0.564                                                        | 0.505                          | 2045.11            | 1033.62            | 0.285                          | 1496.84            | 426.81             |
| A_68_P24563510 | chr6:77193700-77193744                            | NM_028880:1012     | Lrrtm1     | INSIDE                 | 0.575                                                        | 0.419                          | 2931.13            | 1229.01            | 0.241                          | 2281.35            | 550.31             |
| A_68_P24792500 | chr6:119280593-119280637                          | NM_001172207:-1392 | Lrrtm2     | PROMOTER               | 0.5                                                          | 3.958                          | 2243.32            | 8879.50            | 1.98                           | 1753.31            | 3472.20            |
| A_68_P24792501 | chr6:119280733-119280777                          | NM_001172207:-1532 | Lrrtm2     | PROMOTER               | 0.585                                                        | 0.608                          | 2659.11            | 1615.80            | 0.355                          | 2011.27            | 714.90             |
| A_68_P27765093 | chr11:45758539-45758583                           | NM_028185:-123     | Lsm11      | PROMOTER               | 0.353                                                        | 9.754                          | 3430.10            | 33455.97           | 3.446                          | 2987.92            | 10297.46           |
| A_68_P21900913 | chr2:179759394-179759438                          | NM_177727:-275     | Lsm14b     | PROMOTER               | 0.173                                                        | 23.955                         | 4888.74            | 117108.40          | 4.14                           | 4326.28            | 17911.92           |
| A_68_P21900919 | chr2:179760085-179760129                          | NM_177727:415      | Lsm14b     | INSIDE                 | 0.568                                                        | 6.876                          | 1939.13            | 13333.97           | 3.907                          | 1598.52            | 6245.70            |
| A_68_P31156879 | chr17:35119358-35119402                           | NM_001204273:306   | Lsm2       | INSIDE                 | 0.523                                                        | 0.524                          | 1512.08            | 791.60             | 0.274                          | 1297.13            | 355.28             |
| A_68_P25953306 | chr8:73197314-73197358                            | NM_015816:207      | Lsm4       | INSIDE                 | 0.321                                                        | 0.309                          | 2817.85            | 871.78             | 0.099                          | 1728.61            | 171.92             |
| A_68_P24476402 | chr6:56654577-56654621                            | NM_025520:95       | Lsm5       | INSIDE                 | 0.493                                                        | 4.295                          | 1419.02            | 6094.99            | 2.117                          | 1168.93            | 2474.17            |
| A_68_P25991120 | chr8:81344808-81344852                            | NM_001191004:221   | Lsm6       | INSIDE                 | 0.359                                                        | 0.696                          | 1019.26            | 709.18             | 0.25                           | 845.49             | 211.32             |
| A_68_P25034375 | chr7:31758234-31758278                            | NM_001164184:232   | Lsr        | INSIDE                 | 0.402                                                        | 9.123                          | 1443.07            | 13165.64           | 3.669                          | 1167.10            | 4281.62            |
| A_68_P27262526 | chr10:75994451-75994495                           | NM_146006:101      | Lss        | INSIDE                 | 0.378                                                        | 14.080                         | 6425.93            | 90477.43           | 5.322                          | 5329.23            | 28359.91           |
| A_68_P27353694 | chr10:92916374-92916418                           | NM_008517:256      | Lta4h      | INSIDE                 | 0.445                                                        | 0.410                          | 1170.50            | 480.40             | 0.183                          | 937.50             | 171.38             |
| A_68_P31158194 | chr17:35333102-35333146                           | NM_008518:1673     | Ltb        | INSIDE                 | 0.515                                                        | 0.545                          | 1432.03            | 780.89             | 0.281                          | 955.12             | 268.15             |
| A_68_P29619799 | chr14:56386649-56386693                           | NM_008519:1872     | Ltb4r1     | INSIDE                 | 0.612                                                        | 7.915                          | 735.21             | 5819.29            | 4.846                          | 741.68             | 3593.91            |
| A_68_P29619756 | chr14:56381232-56381276                           | NM_020490:990      | Ltb4r2     | INSIDE                 | 0.345                                                        | 5.562                          | 897.44             | 4991.78            | 1.92                           | 806.52             | 1548.47            |
| A_68_P31354400 | chr17:75404960-75405004                           | NM_019919:114      | Ltbp1      | INSIDE                 | 0.498                                                        | 0.445                          | 3775.29            | 1678.25            | 0.221                          | 3029.98            | 670.94             |
| A_68_P28600849 | chr12:86217266-86217310                           | NM_013589:157      | Ltbp2      | INSIDE                 | 0.546                                                        | 0.584                          | 823.70             | 481.06             | 0.319                          | 678.19             | 216.13             |
| A_68_P28600848 | chr12:86217110-86217154                           | NM_013589:313      | Ltbp2      | INSIDE                 | 0.52                                                         | 3.120                          | 998.46             | 3115.14            | 1.623                          | 796.19             | 1292.34            |
| A_68_P31930563 | chr19:5742280-5742324                             | NM_008520:1399     | Ltbp3      | INSIDE                 | 0.646                                                        | 4.488                          | 979.33             | 4395.29            | 2.9                            | 820.07             | 2378.51            |
| A_68_P25016756 | chr7:28119811-28119855                            | NM_001113549:-1165 | Ltbp4      | PROMOTER               | 0.141                                                        | 42.098                         | 2999.77            | 126285.20          | 5.954                          | 2854.40            | 16996.54           |
| A_68_P25016747 | chr7:28118579-28118623                            | NM_001113549:67    | Ltbp4      | INSIDE                 | 0.637                                                        | 5.449                          | 3176.01            | 17304.89           | 3.469                          | 2482.67            | 8611.15            |
| A_68_P25016714 | chr7:28114472-28114516                            | NM_001113549:4173  | Ltbp4      | INSIDE                 | 0.658                                                        | 0.602                          | 2497.06            | 1503.05            | 0.396                          | 1878.71            | 743.91             |
| A_68_P27787506 | chr11:50050605-50050649                           | NM_008521:1347     | Ltc4s      | INSIDE                 | 0.571                                                        | 0.303                          | 2006.05            | 607.92             | 0.173                          | 1560.60            | 270.26             |
| A_68_P21571366 | chr2:119584202-119584246                          | NM_008523:37       | Ltk        | INSIDE                 | 0.538                                                        | 0.466                          | 1507.11            | 702.03             | 0.251                          | 1170.98            | 293.68             |
| A_68_P23334085 | chr4:136025641-136025685                          | NM_024452:-13      | Luzp1      | PROMOTER               | 0.22                                                         | 21.123                         | 7545.46            | 159381.30          | 4.655                          | 7336.11            | 34149.96           |
| A_68_P22210127 | chr3:67267701-67267745                            | NM_016753:107      | Lxn        | INSIDE                 | 0.501                                                        | 0.257                          | 7056.69            | 1810.48            | 0.128                          | 4741.17            | 609.03             |
| A_68_P30340463 | chr15:74785980-74786024                           | NM_001164040:467   | Ly6c       | INSIDE                 | 0.394                                                        | 4.165                          | 20258.82           | 84383.59           | 1.641                          | 13715.32           | 22512.76           |
| A_68_P30342689 | chr15:75396844-75396888                           | NM_001135689:212   | Ly6h       | INSIDE                 | 0.4                                                          | 4.154                          | 1598.42            | 6639.32            | 1.663                          | 1344.88            | 2236.13            |
| A_68_P30339717 | chr15:74630092-74630141                           | NM_029627:282      | Ly6k       | INSIDE                 | 0.322                                                        | 10.065                         | 480.52             | 4836.29            | 3.24                           | 354.65             | 1149.21            |
| A_68_P21258086 | chr2:60221286-60221330                            | NM_013825:-20      | Ly75       | PROMOTER               | 0.45                                                         | 5.866                          | 3497.23            | 20513.67           | 2.641                          | 3109.62            | 8211.24            |
| A_68_P26021276 | chr8:87229573-87229617                            | NM_008535:4239     | Lyl1       | DOWNSTREAM             | 0.221                                                        | 0.745                          | 3072.24            | 2288.91            | 0.165                          | 2307.01            | 380.46             |
| A_68_P22693715 | chr4:3605587-3605631                              | NM_001111096:341   | Lyn        | INSIDE                 | 0.45                                                         | 0.443                          | 1055.27            | 467.42             | 0.199                          | 881.01             | 175.69             |
| A_68_P20587179 | chr1:127808497-127808541                          | NM_145100:273      | Lypd1      | INSIDE                 | 0.621                                                        | 2.893                          | 876.14             | 2535.08            | 1.798                          | 766.61             | 1378.38            |
| A_68_P21206004 | chr2:49921862-49921906                            | NM_177139:-97      | Lypd6      | PROMOTER               | 0.521                                                        | 3.227                          | 2394.08            | 7724.53            | 1.68                           | 2045.96            | 3436.90            |
| A_68_P21204319 | chr2:49643540-49643584                            | NM_027990:357      | Lypd6b     | INSIDE                 | 0.142                                                        | 21.321                         | 1601.58            | 34147.29           | 3.021                          | 1610.27            | 4865.23            |
| A_68_P20007252 | chr1:4797954-4797998                              | NM_008866:3        | Lypla1     | INSIDE                 | 0.478                                                        | 4.775                          | 1069.45            | 5106.36            | 2.281                          | 859.84             | 1961.23            |

| ProbeName      | Target position of probe on CpG island microarray | TargetID            | GeneSymbol | CpG island Description | Ratio of relative methylation (TiO <sub>2</sub> -NP/Vehicle) | Sham group                     |                    |                    | TiO <sub>2</sub> -H group      |                    |                    |
|----------------|---------------------------------------------------|---------------------|------------|------------------------|--------------------------------------------------------------|--------------------------------|--------------------|--------------------|--------------------------------|--------------------|--------------------|
|                |                                                   |                     |            |                        |                                                              | Relative methylation (Cy5/Cy3) | Cy3 signal (Input) | Cy5 signal (MeDIP) | Relative methylation (Cy5/Cy3) | Cy3 signal (Input) | Cy5 signal (MeDIP) |
| A_68_P20007250 | chr1:4797717-4797761                              | NM_008866:-235      | Lyp1a1     | PROMOTER               | 0.618                                                        | 4.059                          | 603.83             | 2451.13            | 2.509                          | 499.11             | 1252.10            |
| A_68_P23331510 | chr4:135528254-135528298                          | NM_011942:233       | Lyp1a2     | INSIDE                 | 0.647                                                        | 2.254                          | 1559.64            | 3514.85            | 1.458                          | 1320.09            | 1924.78            |
| A_68_P20905056 | chr1:187941218-187941262                          | NM_146106:-51       | Lyp1a1     | PROMOTER               | 0.308                                                        | 9.616                          | 1200.81            | 11546.52           | 2.957                          | 1191.57            | 3523.73            |
| A_68_P28946344 | chr13:36083419-36083472                           | NM_201358:125781    | Lym4       | INSIDE                 | 0.414                                                        | 7.422                          | 844.99             | 6271.42            | 3.07                           | 570.97             | 1752.81            |
| A_68_P27812425 | chr11:54674397-54674456                           | NM_029327:-333      | Lym7       | DIVERGENT_PROMOTER     | 0.521                                                        | 14.532                         | 344.36             | 5004.24            | 7.577                          | 388.89             | 2946.68            |
| A_68_P32135961 | chr19:45100549-45100593                           | NM_001130526:7946   | Lzts2      | INSIDE                 | 0.543                                                        | 2.936                          | 1470.58            | 4317.62            | 1.596                          | 1049.71            | 1674.94            |
| A_68_P23264207 | chr4:123341175-123341219                          | NM_001199136:20407  | Macf1      | INSIDE                 | 0.371                                                        | 5.532                          | 1458.50            | 8067.78            | 2.054                          | 1178.19            | 2419.63            |
| A_68_P23264212 | chr4:123341892-123341936                          | NM_001199136:19689  | Macf1      | INSIDE                 | 0.611                                                        | 10.964                         | 2472.16            | 27105.89           | 6.698                          | 2250.52            | 15072.89           |
| A_68_P23264337 | chr4:123364300-123364344                          | NM_001199136:-2719  | Macf1      | PROMOTER               | 0.537                                                        | 5.806                          | 356.63             | 2070.72            | 3.121                          | 306.51             | 956.52             |
| A_68_P31938325 | chr19:7240713-7240757                             | NM_134147:109477    | Macro1     | INSIDE                 | 0.252                                                        | 0.465                          | 1909.55            | 887.99             | 0.117                          | 1458.61            | 171.11             |
| A_68_P31938321 | chr19:7239801-7239845                             | NM_134147:108565    | Macro1     | INSIDE                 | 0.38                                                         | 16.280                         | 779.70             | 12693.18           | 6.192                          | 726.34             | 4497.65            |
| A_68_P31938323 | chr19:7240213-7240257                             | NM_134147:108977    | Macro1     | INSIDE                 | 0.498                                                        | 7.999                          | 2981.27            | 23847.61           | 3.987                          | 2750.16            | 10964.07           |
| A_68_P21683849 | chr2:140221825-140221869                          | NM_028387:676       | Macro2     | INSIDE                 | 0.449                                                        | 14.317                         | 1232.61            | 17646.76           | 6.429                          | 1273.21            | 8185.06            |
| A_68_P23392617 | chr4:147514830-147514874                          | NM_027985:254       | Mad2l2     | INSIDE                 | 0.633                                                        | 0.419                          | 1910.07            | 800.61             | 0.265                          | 1476.80            | 391.99             |
| A_68_P21421182 | chr2:91022680-91022724                            | NM_001177720:-3224  | Madd       | PROMOTER               | 0.264                                                        | 8.445                          | 2899.87            | 24488.93           | 2.226                          | 2882.43            | 6417.65            |
| A_68_P21421185 | chr2:91022943-91022987                            | NM_001177720:-3486  | Madd       | PROMOTER               | 0.283                                                        | 8.740                          | 1467.67            | 12826.73           | 2.477                          | 1261.85            | 3125.56            |
| A_68_P21421187 | chr2:91023173-91023217                            | NM_001177720:-3716  | Madd       | PROMOTER               | 0.491                                                        | 5.237                          | 1290.11            | 6756.13            | 2.569                          | 1032.59            | 2653.24            |
| A_68_P23588236 | chr5:33678555-33678599                            | NM_021500:356       | Maea       | INSIDE                 | 0.191                                                        | 17.675                         | 2530.06            | 44717.93           | 3.369                          | 2601.50            | 8763.33            |
| A_68_P23588238 | chr5:33678734-33678778                            | NM_021500:536       | Maea       | INSIDE                 | 0.307                                                        | 11.425                         | 2167.96            | 24769.17           | 3.511                          | 2535.27            | 8901.25            |
| A_68_P26192688 | chr8:118232099-118232143                          | NM_001025577:-1326  | Maf        | PROMOTER               | 0.657                                                        | 0.190                          | 2838.91            | 538.50             | 0.125                          | 2085.80            | 260.09             |
| A_68_P26192683 | chr8:118231489-118231533                          | NM_001025577:-716   | Maf        | PROMOTER               | 0.423                                                        | 5.309                          | 592.93             | 3148.12            | 2.248                          | 526.12             | 1182.62            |
| A_68_P30347740 | chr15:76181682-76181726                           | NM_001164607:-19    | Maf1       | DIVERGENT_PROMOTER     | 0.41                                                         | 0.221                          | 2769.03            | 610.79             | 0.09                           | 1897.87            | 171.50             |
| A_68_P30343816 | chr15:75578159-75578203                           | NM_194350:172       | Mafa       | INSIDE                 | 0.245                                                        | 9.964                          | 2709.67            | 26999.66           | 2.442                          | 2089.56            | 5103.67            |
| A_68_P30343819 | chr15:75578604-75578648                           | NM_194350:-274      | Mafa       | PROMOTER               | 0.462                                                        | 6.083                          | 1264.26            | 7690.13            | 2.813                          | 1040.80            | 2927.84            |
| A_68_P30365871 | chr15:79178186-79178230                           | NM_010755:101       | Maff       | INSIDE                 | 0.242                                                        | 1.531                          | 2130.10            | 3261.92            | 0.371                          | 1570.55            | 582.99             |
| A_68_P30365939 | chr15:79188220-79188264                           | NM_010755:10135     | Maff       | INSIDE                 | 0.476                                                        | 2.948                          | 2025.66            | 5971.59            | 1.404                          | 1815.50            | 2549.60            |
| A_68_P24137624 | chr5:140267260-140267304                          | NM_010757:-207      | Mafk       | PROMOTER               | 0.397                                                        | 0.402                          | 1582.04            | 636.76             | 0.16                           | 1138.64            | 181.86             |
| A_68_P21583618 | chr2:121781814-121781858                          | NM_008545:-8        | Mageb3     | DIVERGENT_PROMOTER     | 0.542                                                        | 3.301                          | 3811.57            | 12580.17           | 1.79                           | 3111.88            | 5571.81            |
| A_68_P32539367 | chrX:91787344-91787392                            | NM_019791:45        | Maged1     | INSIDE                 | 0.573                                                        | 2.976                          | 2920.98            | 8693.26            | 1.705                          | 3854.87            | 6570.69            |
| A_68_P32742983 | chrX:147247480-147247524                          | NM_001199246:744    | Maged2     | INSIDE                 | 0.29                                                         | 14.530                         | 1894.38            | 27526.01           | 4.21                           | 2257.26            | 9503.99            |
| A_68_P32751751 | chrX:149472100-149472144                          | NM_023788:-16       | Mageh1     | PROMOTER               | 0.224                                                        | 32.130                         | 7696.09            | 247278.30          | 7.19                           | 9640.83            | 69321.28           |
| A_68_P24656008 | chr6:94234014-94234058                            | NM_001029850:-138   | Magi1      | PROMOTER               | 0.532                                                        | 4.748                          | 2368.94            | 11247.21           | 2.526                          | 2175.93            | 5496.34            |
| A_68_P24652024 | chr6:93628341-93628385                            | NM_001083320:235322 | Magi1      | INSIDE                 | 0.653                                                        | 3.376                          | 894.64             | 3020.03            | 2.204                          | 767.35             | 1691.62            |
| A_68_P24656000 | chr6:94233185-94233229                            | NM_001029850:692    | Magi1      | INSIDE                 | 0.326                                                        | 4.885                          | 5237.43            | 25583.96           | 1.592                          | 4135.59            | 6583.54            |
| A_68_P23513990 | chr5:18732536-18732580                            | NM_001170746:-305   | Magi2      | PROMOTER               | 0.075                                                        | 65.454                         | 6912.95            | 452476.70          | 4.912                          | 8241.07            | 40481.29           |
| A_68_P23513989 | chr5:18732427-18732471                            | NM_001170746:-415   | Magi2      | PROMOTER               | 0.296                                                        | 12.409                         | 1297.07            | 16095.34           | 3.678                          | 1207.93            | 4442.88            |
| A_68_P23513988 | chr5:18732289-18732333                            | NM_001170746:-553   | Magi2      | PROMOTER               | 0.34                                                         | 0.332                          | 1843.36            | 611.41             | 0.113                          | 1547.69            | 174.49             |
| A_68_P23513996 | chr5:18733426-18733470                            | NM_001170746:585    | Magi2      | INSIDE                 | 0.641                                                        | 0.715                          | 5245.02            | 3749.67            | 0.459                          | 3734.41            | 1712.63            |
| A_68_P32582402 | chrX:103206930-103206974                          | NM_001190409:286    | Magt1      | INSIDE                 | 0.285                                                        | 6.819                          | 430.29             | 2934.30            | 1.947                          | 469.63             | 914.20             |
| A_68_P21614869 | chr2:127481863-127481907                          | NM_001171187:547    | Mal        | INSIDE                 | 0.543                                                        | 0.598                          | 1374.86            | 822.43             | 0.325                          | 1083.43            | 352.17             |
| A_68_P31930914 | chr19:5803350-5803394                             | NR_002847:-701      | Malat1     | PROMOTER               | 0.452                                                        | 5.734                          | 2684.41            | 15392.82           | 2.591                          | 2135.47            | 5532.58            |
| A_68_P31781218 | chr18:65590541-65590585                           | NM_172833:-88       | Malt1      | PROMOTER               | 0.504                                                        | 8.260                          | 11701.60           | 96651.59           | 4.16                           | 9139.36            | 38022.61           |
| A_68_P27787814 | chr11:50105808-50105852                           | NM_175334:8         | Maml1      | INSIDE                 | 0.433                                                        | 5.731                          | 1755.59            | 10061.15           | 2.482                          | 1407.63            | 3494.36            |
| A_68_P27787812 | chr11:50105519-50105563                           | NM_175334:298       | Maml1      | INSIDE                 | 0.608                                                        | 5.774                          | 503.47             | 2907.09            | 3.509                          | 460.95             | 1617.56            |
| A_68_P27787811 | chr11:50105373-50105417                           | NM_175334:444       | Maml1      | INSIDE                 | 0.393                                                        | 4.991                          | 550.88             | 2749.71            | 1.962                          | 496.94             | 975.22             |
| A_68_P22133096 | chr3:51811618-51811662                            | NM_001004176:97288  | Maml3      | INSIDE                 | 0.342                                                        | 12.144                         | 568.56             | 6904.67            | 4.154                          | 490.96             | 2039.64            |

| ProbeName      | Target position of probe on CpG island microarray | TargetID            | GeneSymbol | CpG island Description | Ratio of relative methylation (TiO <sub>2</sub> -NP/Vehicle) | Sham group                     |                    |                    | TiO <sub>2</sub> -H group      |                    |                    |
|----------------|---------------------------------------------------|---------------------|------------|------------------------|--------------------------------------------------------------|--------------------------------|--------------------|--------------------|--------------------------------|--------------------|--------------------|
|                |                                                   |                     |            |                        |                                                              | Relative methylation (Cy5/Cy3) | Cy3 signal (Input) | Cy5 signal (MeDIP) | Relative methylation (Cy5/Cy3) | Cy3 signal (Input) | Cy5 signal (MeDIP) |
| A_68_P22133744 | chr3:51906476-51906520                            | NM_001004176:2430   | Mam13      | INSIDE                 | 0.538                                                        | 0.410                          | 1078.83            | 441.92             | 0.22                           | 768.88             | 169.46             |
| A_68_P32451589 | chrX:68303308-68303352                            | NM_001081354:-100   | Mam1d1     | PROMOTER               | 0.572                                                        | 4.438                          | 1505.62            | 6681.86            | 2.54                           | 1931.20            | 4906.19            |
| A_68_P27145715 | chr10:53795287-53795331                           | NM_008548:294       | Man1a      | INSIDE                 | 0.38                                                         | 4.958                          | 2671.49            | 13246.60           | 1.886                          | 2168.98            | 4090.89            |
| A_68_P23324350 | chr4:134260533-134260577                          | NM_207237:-349      | Man1c1     | PROMOTER               | 0.321                                                        | 19.942                         | 5003.90            | 99787.64           | 6.408                          | 4159.51            | 26652.78           |
| A_68_P31296462 | chr17:64950677-64950721                           | NM_008549:-290      | Man2a1     | PROMOTER               | 0.429                                                        | 5.549                          | 804.63             | 4465.22            | 2.379                          | 696.99             | 1657.98            |
| A_68_P25266322 | chr7:87515822-87515866                            | NM_172903:417       | Man2a2     | INSIDE                 | 0.56                                                         | 0.274                          | 4802.20            | 1315.21            | 0.153                          | 3544.35            | 543.76             |
| A_68_P25266277 | chr7:87508028-87508072                            | NM_172903:8211      | Man2a2     | INSIDE                 | 0.554                                                        | 2.619                          | 1734.29            | 4541.42            | 1.45                           | 1255.27            | 1820.32            |
| A_68_P23609898 | chr5:37221813-37221857                            | NM_008550:54        | Man2b2     | INSIDE                 | 0.654                                                        | 2.997                          | 412.63             | 1236.83            | 1.962                          | 433.02             | 849.45             |
| A_68_P26540423 | chr9:56978779-56978823                            | NM_028636:217       | Man2c1     | INSIDE                 | 0.658                                                        | 3.960                          | 801.25             | 3172.80            | 2.606                          | 753.09             | 1962.19            |
| A_68_P22793481 | chr4:26274038-26274083                            | NM_172865:-261      | Manea      | PROMOTER               | 0.311                                                        | 6.065                          | 2711.56            | 16445.35           | 1.884                          | 2310.71            | 4354.36            |
| A_68_P23270750 | chr4:124538805-124538849                          | NM_001007573:589    | Manea      | INSIDE                 | 0.061                                                        | 8.010                          | 3440.02            | 27553.32           | 0.491                          | 2535.58            | 1246.18            |
| A_68_P24862663 | chr6:134582475-134582519                          | NM_026345:10        | Mansc1     | INSIDE                 | 0.433                                                        | 5.125                          | 1936.85            | 9927.15            | 2.218                          | 1798.79            | 3990.47            |
| A_68_P21764750 | chr2:155102799-155102843                          | NM_025735:641       | Map11c3a   | INSIDE                 | 0.49                                                         | 4.385                          | 4307.23            | 18887.10           | 2.148                          | 3514.34            | 7547.10            |
| A_68_P26227606 | chr8:124109508-124109552                          | NM_026160:-4837     | Map11c3b   | DIVERGENT_PROMOTER     | 0.4                                                          | 0.438                          | 1199.20            | 525.81             | 0.175                          | 980.12             | 171.77             |
| A_68_P26227634 | chr8:124114601-124114645                          | NM_026160:255       | Map11c3b   | INSIDE                 | 0.603                                                        | 0.522                          | 2123.02            | 1109.21            | 0.315                          | 1631.37            | 513.67             |
| A_68_P26580975 | chr9:64101634-64101678                            | NM_008927:-244      | Map2k1     | PROMOTER               | 0.464                                                        | 0.297                          | 2077.34            | 616.27             | 0.138                          | 1605.92            | 221.00             |
| A_68_P26580973 | chr9:64101378-64101422                            | NM_008927:12        | Map2k1     | INSIDE                 | 0.562                                                        | 4.372                          | 882.16             | 3856.47            | 2.458                          | 797.56             | 1960.31            |
| A_68_P29330800 | chr13:112598036-112598080                         | NM_011945:1133      | Map3k1     | INSIDE                 | 0.105                                                        | 26.349                         | 1186.05            | 31251.77           | 2.771                          | 1174.60            | 3254.93            |
| A_68_P29330809 | chr13:112599173-112599217                         | NM_011945:-3        | Map3k1     | PROMOTER               | 0.465                                                        | 0.585                          | 1309.83            | 765.93             | 0.272                          | 1198.71            | 325.72             |
| A_68_P29330398 | chr13:112545643-112545687                         | NM_011945:53527     | Map3k1     | INSIDE                 | 0.627                                                        | 2.701                          | 1153.51            | 3115.24            | 1.694                          | 822.52             | 1392.99            |
| A_68_P25018407 | chr7:28442995-28443039                            | NM_001081292:16601  | Map3k10    | INSIDE                 | 0.027                                                        | 86.462                         | 1113.78            | 96299.86           | 2.296                          | 971.87             | 2231.25            |
| A_68_P25018412 | chr7:28443528-28443572                            | NM_001081292:16067  | Map3k10    | INSIDE                 | 0.651                                                        | 0.459                          | 1339.91            | 614.72             | 0.299                          | 1088.23            | 325.03             |
| A_68_P30498333 | chr15:102347359-102347404                         | NM_001163643:54     | Map3k12    | INSIDE                 | 0.449                                                        | 0.688                          | 1942.88            | 1337.60            | 0.309                          | 1470.80            | 454.28             |
| A_68_P28084317 | chr11:103128474-103128518                         | NM_016896:219       | Map3k14    | INSIDE                 | 0.596                                                        | 0.454                          | 3227.12            | 1463.87            | 0.27                           | 2341.20            | 633.10             |
| A_68_P32777676 | chrX:156426760-156426804                          | NM_001163085:418    | Map3k15    | INSIDE                 | 0.514                                                        | 5.651                          | 2715.87            | 15346.63           | 2.907                          | 3046.51            | 8854.83            |
| A_68_P32777673 | chrX:156426105-156426149                          | NM_001163085:-238   | Map3k15    | PROMOTER               | 0.18                                                         | 11.486                         | 279.96             | 3215.67            | 2.07                           | 425.72             | 881.28             |
| A_68_P28099478 | chr11:105946211-105946255                         | NM_011947:17        | Map3k3     | INSIDE                 | 0.239                                                        | 28.094                         | 15969.16           | 448632.40          | 6.724                          | 16021.48           | 107730.80          |
| A_68_P31051121 | chr17:12511550-12511594                           | NM_011948:-46       | Map3k4     | PROMOTER               | 0.656                                                        | 2.636                          | 1507.08            | 3972.04            | 1.73                           | 1185.29            | 2050.04            |
| A_68_P26983894 | chr10:19654073-19654117                           | NM_008580:-237      | Map3k5     | PROMOTER               | 0.417                                                        | 10.144                         | 1115.49            | 11315.26           | 4.235                          | 988.92             | 4188.13            |
| A_68_P26983899 | chr10:19654713-19654757                           | NM_008580:403       | Map3k5     | INSIDE                 | 0.467                                                        | 4.167                          | 3540.13            | 14751.75           | 1.946                          | 2946.61            | 5734.17            |
| A_68_P26983898 | chr10:19654588-19654632                           | NM_008580:279       | Map3k5     | INSIDE                 | 0.465                                                        | 3.408                          | 2042.61            | 6961.11            | 1.584                          | 1622.72            | 2570.75            |
| A_68_P26983891 | chr10:19653749-19653793                           | NM_008580:-561      | Map3k5     | PROMOTER               | 0.53                                                         | 2.794                          | 1894.80            | 5294.45            | 1.481                          | 1702.51            | 2520.82            |
| A_68_P23316586 | chr4:132807259-132807303                          | NM_016693:10548     | Map3k6     | INSIDE                 | 0.274                                                        | 8.256                          | 1556.79            | 12852.33           | 2.259                          | 1341.91            | 3031.42            |
| A_68_P23316515 | chr4:132797012-132797056                          | NM_016693:302       | Map3k6     | INSIDE                 | 0.51                                                         | 7.870                          | 1013.37            | 7974.99            | 4.012                          | 997.14             | 4000.40            |
| A_68_P23316517 | chr4:132797307-132797351                          | NM_016693:596       | Map3k6     | INSIDE                 | 0.596                                                        | 0.473                          | 3478.96            | 1644.15            | 0.282                          | 2357.19            | 664.00             |
| A_68_P22818618 | chr4:32050821-32050865                            | NM_009316:-239      | Map3k7     | PROMOTER               | 0.468                                                        | 0.217                          | 2523.37            | 548.78             | 0.102                          | 1779.29            | 180.95             |
| A_68_P28582806 | chr12:82881553-82881597                           | NM_001174107:583    | Map3k9     | INSIDE                 | 0.325                                                        | 1.361                          | 3489.75            | 4747.82            | 0.442                          | 2529.30            | 1117.34            |
| A_68_P31934083 | chr19:6341265-6341309                             | NM_009006:37        | Map4k2     | INSIDE                 | 0.498                                                        | 0.616                          | 1076.33            | 663.29             | 0.307                          | 772.14             | 236.83             |
| A_68_P31383814 | chr17:80976741-80976785                           | NM_001081357:150671 | Map4k3     | DOWNSTREAM             | 0.439                                                        | 0.486                          | 1519.42            | 739.03             | 0.213                          | 1256.91            | 268.23             |
| A_68_P20168277 | chr1:39957569-39957613                            | NM_008696:-167      | Map4k4     | PROMOTER               | 0.321                                                        | 12.803                         | 1517.83            | 19432.07           | 4.11                           | 1793.64            | 7371.56            |
| A_68_P30571313 | chr16:16983889-16983933                           | NM_001038663:436    | Mapk1      | INSIDE                 | 0.428                                                        | 5.887                          | 4073.90            | 23984.47           | 2.522                          | 3237.17            | 8165.22            |
| A_68_P30423478 | chr15:88979773-88979817                           | NM_011161:242       | Mapk11     | INSIDE                 | 0.48                                                         | 4.376                          | 2613.63            | 11436.73           | 2.102                          | 1964.48            | 4128.71            |
| A_68_P30423405 | chr15:88970834-88970878                           | NM_013871:277       | Mapk12     | INSIDE                 | 0.503                                                        | 0.508                          | 1499.04            | 760.81             | 0.255                          | 1103.96            | 282.04             |
| A_68_P30423403 | chr15:88970637-88970681                           | NM_013871:475       | Mapk12     | INSIDE                 | 0.633                                                        | 0.295                          | 1947.81            | 574.59             | 0.187                          | 1572.17            | 293.36             |
| A_68_P31123750 | chr17:28826626-28826670                           | NM_001168508:-1638  | Mapk14     | PROMOTER               | 0.43                                                         | 5.066                          | 1189.47            | 6026.43            | 2.177                          | 1054.75            | 2296.20            |
| A_68_P31123769 | chr17:28828900-28828944                           | NM_001168513:-590   | Mapk14     | PROMOTER               | 0.557                                                        | 0.607                          | 1290.68            | 784.06             | 0.338                          | 1118.14            | 378.49             |

| ProbeName      | Target position of probe on CpG island microarray | TargetID          | GeneSymbol | CpG island Description | Ratio of relative methylation (TiO <sub>2</sub> -NP/Vehicle) | Sham group                     |                    |                    | TiO <sub>2</sub> -H group      |                    |                    |
|----------------|---------------------------------------------------|-------------------|------------|------------------------|--------------------------------------------------------------|--------------------------------|--------------------|--------------------|--------------------------------|--------------------|--------------------|
|                |                                                   |                   |            |                        |                                                              | Relative methylation (Cy5/Cy3) | Cy3 signal (Input) | Cy5 signal (MeDIP) | Relative methylation (Cy5/Cy3) | Cy3 signal (Input) | Cy5 signal (MeDIP) |
| A_68_P31123770 | chr17:28829032-28829076                           | NM_001168513:-458 | Mapk14     | PROMOTER               | 0.458                                                        | 0.726                          | 2017.18            | 1463.77            | 0.332                          | 1613.15            | 535.63             |
| A_68_P31123766 | chr17:28828497-28828541                           | NM_001168513:-994 | Mapk14     | PROMOTER               | 0.529                                                        | 3.894                          | 434.60             | 1692.20            | 2.061                          | 379.53             | 782.07             |
| A_68_P30345385 | chr15:75829377-75829421                           | NM_177922:5200    | Mapk15     | INSIDE                 | 0.621                                                        | 2.862                          | 4479.57            | 12821.58           | 1.778                          | 3593.24            | 6389.98            |
| A_68_P30345384 | chr15:75829239-75829283                           | NM_177922:5062    | Mapk15     | INSIDE                 | 0.64                                                         | 3.480                          | 1737.40            | 6047.00            | 2.226                          | 1423.99            | 3169.53            |
| A_68_P31829410 | chr18:74224381-74224425                           | NM_172632:201     | Mapk4      | INSIDE                 | 0.457                                                        | 0.566                          | 1435.77            | 812.37             | 0.259                          | 1115.19            | 288.34             |
| A_68_P31829408 | chr18:74224160-74224204                           | NM_172632:421     | Mapk4      | INSIDE                 | 0.657                                                        | 0.725                          | 3255.75            | 2360.53            | 0.477                          | 2406.03            | 1146.95            |
| A_68_P31829405 | chr18:74223815-74223859                           | NM_172632:767     | Mapk4      | INSIDE                 | 0.43                                                         | 3.437                          | 1723.84            | 5925.21            | 1.48                           | 1489.27            | 2203.42            |
| A_68_P21428205 | chr2:92229093-92229137                            | NM_001202445:3726 | Mapk8ip1   | INSIDE                 | 0.466                                                        | 3.368                          | 2283.65            | 7692.17            | 1.568                          | 1806.50            | 2832.77            |
| A_68_P30425259 | chr15:89284711-89284755                           | NM_021921:391     | Mapk8ip2   | INSIDE                 | 0.458                                                        | 0.495                          | 3233.23            | 1599.42            | 0.227                          | 2209.40            | 500.47             |
| A_68_P30425255 | chr15:89284136-89284180                           | NM_021921:-183    | Mapk8ip2   | PROMOTER               | 0.542                                                        | 0.556                          | 3937.48            | 2190.35            | 0.302                          | 3176.78            | 957.88             |
| A_68_P31100481 | chr17:25073380-25073424                           | NM_001163447:520  | Mapk8ip3   | INSIDE                 | 0.539                                                        | 0.221                          | 2053.29            | 454.44             | 0.119                          | 1450.03            | 172.93             |
| A_68_P24045146 | chr5:121995041-121995098                          | NM_010765:832     | Mapkapk5   | INSIDE                 | 0.573                                                        | 5.427                          | 279.38             | 1516.11            | 3.109                          | 246.94             | 767.79             |
| A_68_P31556965 | chr18:23962258-23962302                           | NM_153058:-190    | Mapre2     | PROMOTER               | 0.406                                                        | 5.892                          | 1668.99            | 9833.96            | 2.393                          | 1444.19            | 3456.40            |
| A_68_P31556969 | chr18:23962757-23962801                           | NM_153058:308     | Mapre2     | INSIDE                 | 0.454                                                        | 0.145                          | 7107.70            | 1029.10            | 0.066                          | 4380.54            | 288.07             |
| A_68_P28089851 | chr11:104093898-104093942                         | NM_001038609:1171 | Mapt       | INSIDE                 | 0.451                                                        | 6.172                          | 2740.74            | 16916.38           | 2.781                          | 2141.65            | 5956.53            |
| A_68_P30086024 | chr15:26238596-26238640                           | NM_177597:-208    | Marchf11   | PROMOTER               | 0.395                                                        | 0.496                          | 4344.32            | 2156.18            | 0.196                          | 2980.77            | 584.44             |
| A_68_P30086025 | chr15:26238685-26238729                           | NM_177597:-120    | Marchf11   | PROMOTER               | 0.388                                                        | 0.639                          | 8018.27            | 5123.72            | 0.248                          | 6078.48            | 1507.12            |
| A_68_P30086030 | chr15:26239396-26239440                           | NM_177597:592     | Marchf11   | INSIDE                 | 0.529                                                        | 2.677                          | 1822.00            | 4876.61            | 1.416                          | 1517.22            | 2147.74            |
| A_68_P31150250 | chr17:33855758-33855802                           | NM_145486:-165    | Marchf2    | PROMOTER               | 0.528                                                        | 4.266                          | 2967.14            | 12659.28           | 2.253                          | 2447.61            | 5514.90            |
| A_68_P20337461 | chr1:72582629-72582673                            | NM_001045533:488  | Marchf4    | INSIDE                 | 0.254                                                        | 27.854                         | 2544.21            | 70866.77           | 7.082                          | 3225.79            | 22845.53           |
| A_68_P20337470 | chr1:72583581-72583625                            | NM_001045533:-464 | Marchf4    | PROMOTER               | 0.26                                                         | 12.123                         | 2539.98            | 30792.07           | 3.154                          | 2025.32            | 6388.41            |
| A_68_P32094489 | chr19:37308834-37308878                           | NM_027314:26822   | Marchf5    | DOWNSTREAM             | 0.394                                                        | 0.521                          | 994.79             | 518.73             | 0.205                          | 846.17             | 173.64             |
| A_68_P30114903 | chr15:31460728-31460772                           | NM_172606:42      | Marchf6    | INSIDE                 | 0.54                                                         | 3.033                          | 2497.09            | 7574.21            | 1.637                          | 2042.04            | 3343.72            |
| A_68_P23297033 | chr4:129190774-129190818                          | NM_010807:-28     | Marcks11   | PROMOTER               | 0.176                                                        | 26.757                         | 8573.76            | 229406.30          | 4.716                          | 7217.99            | 34040.56           |
| A_68_P23297034 | chr4:129190844-129190888                          | NM_010807:42      | Marcks11   | INSIDE                 | 0.304                                                        | 22.473                         | 20159.53           | 453042.60          | 6.825                          | 26780.04           | 182765.90          |
| A_68_P31939393 | chr19:7416055-7416099                             | NM_001080388:258  | Mark2      | INSIDE                 | 0.617                                                        | 4.153                          | 5950.38            | 24711.91           | 2.563                          | 4671.16            | 11973.90           |
| A_68_P28744817 | chr12:112812887-112812931                         | NM_021516:188     | Mark3      | INSIDE                 | 0.528                                                        | 3.505                          | 1062.69            | 3724.50            | 1.85                           | 1009.97            | 1868.02            |
| A_68_P24993426 | chr7:20043771-20043815                            | NM_172279:51      | Mark4      | INSIDE                 | 0.486                                                        | 0.433                          | 4507.64            | 1951.17            | 0.21                           | 3344.54            | 703.22             |
| A_68_P24993423 | chr7:20043402-20043446                            | NM_172279:419     | Mark4      | INSIDE                 | 0.494                                                        | 0.291                          | 3492.57            | 1015.28            | 0.144                          | 2783.00            | 399.99             |
| A_68_P27535217 | chr10:126749029-126749081                         | NM_001003913:-212 | Mars       | PROMOTER               | 0.477                                                        | 0.482                          | 996.78             | 480.45             | 0.23                           | 739.51             | 169.85             |
| A_68_P20241002 | chr1:55294197-55294241                            | NM_175439:198     | Mars2      | INSIDE                 | 0.427                                                        | 5.374                          | 2283.85            | 12272.68           | 2.294                          | 1728.60            | 3966.00            |
| A_68_P32119293 | chr19:42222595-42222639                           | NM_183195:738     | Marveld1   | INSIDE                 | 0.48                                                         | 0.646                          | 1029.89            | 664.90             | 0.31                           | 803.01             | 248.62             |
| A_68_P32119294 | chr19:42222686-42222730                           | NM_183195:830     | Marveld1   | INSIDE                 | 0.329                                                        | 4.533                          | 2919.40            | 13233.54           | 1.49                           | 2335.28            | 3479.00            |
| A_68_P29269301 | chr13:101386489-101386533                         | NM_178410:389     | Marveld2   | INSIDE                 | 0.26                                                         | 1.765                          | 3100.44            | 5472.10            | 0.459                          | 2256.34            | 1036.25            |
| A_68_P29269300 | chr13:101386400-101386444                         | NM_178410:476     | Marveld2   | INSIDE                 | 0.169                                                        | 1.783                          | 651.62             | 1161.68            | 0.301                          | 586.59             | 176.61             |
| A_68_P26159961 | chr8:112485994-112486038                          | NM_212447:89      | Marveld3   | INSIDE                 | 0.346                                                        | 5.213                          | 1351.68            | 7046.13            | 1.802                          | 1133.55            | 2042.34            |
| A_68_P26022615 | chr8:87436867-87436911                            | NM_019945:24364   | Mast1      | INSIDE                 | 0.41                                                         | 0.367                          | 1556.05            | 570.92             | 0.15                           | 1137.58            | 171.01             |
| A_68_P26022617 | chr8:87437152-87437196                            | NM_019945:24078   | Mast1      | INSIDE                 | 0.486                                                        | 0.555                          | 1475.15            | 818.54             | 0.269                          | 1094.54            | 294.91             |
| A_68_P26022687 | chr8:87447829-87447873                            | NM_019945:13402   | Mast1      | INSIDE                 | 0.554                                                        | 4.282                          | 3009.37            | 12887.33           | 2.371                          | 2220.73            | 5266.00            |
| A_68_P23229430 | chr4:116136663-116136707                          | NM_001042743:104  | Mast2      | INSIDE                 | 0.573                                                        | 3.875                          | 347.13             | 1345.30            | 2.22                           | 368.43             | 818.01             |
| A_68_P25954148 | chr8:73321826-73321870                            | NM_199308:-5516   | Mast3      | PROMOTER               | 0.27                                                         | 12.095                         | 5056.21            | 61156.39           | 3.264                          | 3980.91            | 12995.17           |
| A_68_P25954142 | chr8:73321226-73321270                            | NM_199308:-4916   | Mast3      | PROMOTER               | 0.55                                                         | 3.859                          | 2678.64            | 10336.04           | 2.121                          | 2107.02            | 4468.76            |
| A_68_P25954101 | chr8:73316001-73316050                            | NM_199308:307     | Mast3      | INSIDE                 | 0.599                                                        | 0.291                          | 1787.48            | 519.49             | 0.174                          | 1017.68            | 177.13             |
| A_68_P25954141 | chr8:73321121-73321165                            | NM_199308:-4810   | Mast3      | PROMOTER               | 0.615                                                        | 0.607                          | 2211.77            | 1341.47            | 0.373                          | 1584.22            | 591.21             |
| A_68_P25954143 | chr8:73321298-73321342                            | NM_199308:-4988   | Mast3      | PROMOTER               | 0.323                                                        | 1.501                          | 2649.06            | 3975.94            | 0.485                          | 1755.26            | 851.34             |
| A_68_P25954066 | chr8:73311865-73311909                            | NM_199308:4446    | Mast3      | INSIDE                 | 0.637                                                        | 2.387                          | 3158.61            | 7539.91            | 1.521                          | 2443.16            | 3715.87            |

| ProbeName      | Target position of probe on CpG island microarray | TargetID           | GeneSymbol | CpG island Description | Ratio of relative methylation (TiO <sub>2</sub> -NP/Vehicle) | Sham group                     |                    |                    | TiO <sub>2</sub> -H group      |                    |                    |
|----------------|---------------------------------------------------|--------------------|------------|------------------------|--------------------------------------------------------------|--------------------------------|--------------------|--------------------|--------------------------------|--------------------|--------------------|
|                |                                                   |                    |            |                        |                                                              | Relative methylation (Cy5/Cy3) | Cy3 signal (Input) | Cy5 signal (MeDIP) | Relative methylation (Cy5/Cy3) | Cy3 signal (Input) | Cy5 signal (MeDIP) |
| A_68_P29284632 | chr13:104123896-104123940                         | NM_175171:654      | Mast4      | INSIDE                 | 0.494                                                        | 0.506                          | 1214.73            | 614.74             | 0.25                           | 966.06             | 241.67             |
| A_68_P29284641 | chr13:104125004-104125048                         | NM_175171:-454     | Mast4      | PROMOTER               | 0.663                                                        | 0.481                          | 1658.63            | 797.94             | 0.319                          | 1270.46            | 405.19             |
| A_68_P21061711 | chr2:23011327-23011371                            | NM_025979:196      | Mast1      | INSIDE                 | 0.372                                                        | 0.665                          | 2600.21            | 1730.05            | 0.247                          | 2031.23            | 502.52             |
| A_68_P24541702 | chr6:72388860-72388904                            | NM_145569:670      | Mat2a      | INSIDE                 | 0.275                                                        | 8.109                          | 863.19             | 6999.29            | 2.229                          | 1039.02            | 2316.02            |
| A_68_P24541704 | chr6:72389176-72389220                            | NM_145569:354      | Mat2a      | INSIDE                 | 0.301                                                        | 11.436                         | 2172.30            | 24842.27           | 3.441                          | 1849.32            | 6362.74            |
| A_68_P27736855 | chr11:40508399-40508443                           | NM_134017:-2236    | Mat2b      | PROMOTER               | 0.602                                                        | 3.252                          | 1593.37            | 5182.06            | 1.956                          | 1228.22            | 2402.71            |
| A_68_P27288382 | chr10:80720130-80720174                           | NM_010768:-137     | Matk       | PROMOTER               | 0.424                                                        | 20.262                         | 2854.65            | 57841.95           | 8.593                          | 2300.38            | 19766.92           |
| A_68_P23303541 | chr4:130506143-130506190                          | NM_010769:5867     | Matn1      | INSIDE                 | 0.447                                                        | 6.948                          | 442.25             | 3072.63            | 3.103                          | 387.60             | 1202.61            |
| A_68_P30127809 | chr15:34236397-34236441                           | NM_016762:-17      | Matn2      | PROMOTER               | 0.439                                                        | 5.815                          | 3737.21            | 21730.89           | 2.55                           | 3068.17            | 7823.31            |
| A_68_P30127808 | chr15:34236313-34236357                           | NM_016762:-101     | Matn2      | PROMOTER               | 0.364                                                        | 1.809                          | 2725.20            | 4931.12            | 0.658                          | 2124.67            | 1398.31            |
| A_68_P21817647 | chr2:164229981-164230025                          | NM_013592:112      | Matn4      | INSIDE                 | 0.634                                                        | 0.358                          | 1481.17            | 530.91             | 0.227                          | 1272.08            | 289.03             |
| A_68_P31618899 | chr18:35721824-35721868                           | NM_010771:35       | Matr3      | INSIDE                 | 0.394                                                        | 4.151                          | 2558.74            | 10621.30           | 1.635                          | 2207.80            | 3608.95            |
| A_68_P28556950 | chr12:78062975-78063019                           | NM_001146176:239   | Max        | INSIDE                 | 0.219                                                        | 0.293                          | 4325.01            | 1265.43            | 0.064                          | 2678.14            | 171.51             |
| A_68_P25503658 | chr7:134170789-134170833                          | NM_010772:-817     | Maz        | PROMOTER               | 0.276                                                        | 0.602                          | 19783.56           | 11918.67           | 0.166                          | 11811.76           | 1966.26            |
| A_68_P27282936 | chr10:79858095-79858140                           | NM_013595:4107     | Mbd3       | INSIDE                 | 0.28                                                         | 2.610                          | 4813.12            | 12564.17           | 0.73                           | 3177.82            | 2318.87            |
| A_68_P27535068 | chr10:126725665-126725709                         | NM_033072:141      | Mbd6       | INSIDE                 | 0.274                                                        | 4.949                          | 14531.18           | 71921.44           | 1.358                          | 9192.33            | 12478.68           |
| A_68_P24129310 | chr5:138635652-138635696                          | NM_177878:133      | Mblac1     | INSIDE                 | 0.495                                                        | 0.323                          | 1797.41            | 580.54             | 0.16                           | 1435.83            | 229.74             |
| A_68_P28915541 | chr13:30228560-30228604                           | NM_153546:224      | Mboat1     | INSIDE                 | 0.371                                                        | 10.736                         | 4790.51            | 51429.42           | 3.988                          | 4566.35            | 18211.17           |
| A_68_P28291801 | chr12:25516771-25516815                           | NM_001083341:329   | Mboat2     | INSIDE                 | 0.492                                                        | 3.671                          | 791.02             | 2903.89            | 1.806                          | 693.02             | 1251.52            |
| A_68_P24946816 | chr7:3637239-3637283                              | NM_029934:7867     | Mboat7     | INSIDE                 | 0.258                                                        | 19.125                         | 2504.59            | 47900.21           | 4.928                          | 2018.48            | 9947.75            |
| A_68_P24946819 | chr7:3637588-3637632                              | NM_029934:7517     | Mboat7     | INSIDE                 | 0.401                                                        | 8.766                          | 2627.66            | 23035.25           | 3.512                          | 2092.90            | 7349.97            |
| A_68_P31876422 | chr18:82644757-82644801                           | NM_001025245:264   | Mbp        | INSIDE                 | 0.486                                                        | 5.328                          | 1431.99            | 7629.59            | 2.59                           | 1045.76            | 2708.19            |
| A_68_P31876428 | chr18:82645431-82645475                           | NM_001025245:938   | Mbp        | INSIDE                 | 0.485                                                        | 0.673                          | 1081.99            | 727.73             | 0.327                          | 878.17             | 286.73             |
| A_68_P28029575 | chr11:93747831-93747875                           | NM_134012:320      | Mbd1       | INSIDE                 | 0.36                                                         | 10.162                         | 2123.53            | 21578.33           | 3.659                          | 1981.51            | 7250.03            |
| A_68_P26214707 | chr8:122082424-122082468                          | NM_001167910:215   | Mbtp1      | INSIDE                 | 0.351                                                        | 7.802                          | 9604.49            | 74933.46           | 2.735                          | 8609.03            | 23543.82           |
| A_68_P32767195 | chrX:154036840-154036884                          | NM_172307:-215     | Mbtp2      | PROMOTER               | 0.652                                                        | 4.827                          | 417.07             | 2013.38            | 3.147                          | 622.68             | 1959.52            |
| A_68_P26465911 | chr9:43943262-43943306                            | NM_023061:544      | Mcam       | INSIDE                 | 0.333                                                        | 12.210                         | 1718.71            | 20985.06           | 4.062                          | 1384.23            | 5622.67            |
| A_68_P22882678 | chr4:45412906-45412950                            | NM_001009949:8710  | Mcart1     | INSIDE                 | 0.448                                                        | 7.117                          | 1373.56            | 9776.28            | 3.186                          | 1107.08            | 3526.66            |
| A_68_P22882724 | chr4:45421232-45421276                            | NM_001009949:384   | Mcart1     | INSIDE                 | 0.501                                                        | 3.673                          | 1929.53            | 7086.32            | 1.84                           | 1570.20            | 2889.70            |
| A_68_P22882726 | chr4:45421447-45421491                            | NM_001009949:170   | Mcart1     | INSIDE                 | 0.631                                                        | 3.630                          | 1981.67            | 7192.47            | 2.289                          | 1532.93            | 3509.30            |
| A_68_P22056223 | chr3:35899395-35899439                            | NM_023644:184      | Mccc1      | INSIDE                 | 0.616                                                        | 0.400                          | 5125.83            | 2048.61            | 0.246                          | 3737.33            | 920.19             |
| A_68_P25664800 | chr8:12915822-12915866                            | NM_178076:-48      | Mcf2l      | PROMOTER               | 0.428                                                        | 0.273                          | 1966.51            | 535.93             | 0.117                          | 1481.99            | 172.78             |
| A_68_P22344954 | chr3:95463365-95463409                            | NM_008562:744      | Mcl1       | INSIDE                 | 0.535                                                        | 5.217                          | 801.31             | 4180.19            | 2.789                          | 758.09             | 2114.67            |
| A_68_P24624872 | chr6:88848652-88848696                            | NM_008564:100      | Mcm2       | INSIDE                 | 0.438                                                        | 5.674                          | 2297.68            | 13036.55           | 2.486                          | 1807.44            | 4492.51            |
| A_68_P27143272 | chr10:53349951-53349995                           | NM_027830:273      | Mcm9       | INSIDE                 | 0.191                                                        | 1.638                          | 5152.57            | 8441.77            | 0.314                          | 3394.92            | 1064.89            |
| A_68_P27143271 | chr10:53349847-53349891                           | NM_027830:377      | Mcm9       | INSIDE                 | 0.411                                                        | 1.546                          | 16171.53           | 24998.16           | 0.636                          | 11051.09           | 7029.36            |
| A_68_P31161218 | chr17:35978447-35978494                           | NM_001010833:28    | Mdc1       | INSIDE                 | 0.281                                                        | 18.353                         | 6201.78            | 113823.70          | 5.154                          | 6426.22            | 33119.70           |
| A_68_P31130151 | chr17:29979095-29979139                           | NM_001081160:45711 | Mdga1      | INSIDE                 | 0.297                                                        | 0.521                          | 4055.41            | 2112.77            | 0.155                          | 2881.24            | 446.42             |
| A_68_P31130464 | chr17:30025085-30025129                           | NM_001081160:-279  | Mdga1      | PROMOTER               | 0.653                                                        | 9.733                          | 2706.21            | 26338.31           | 6.352                          | 2349.99            | 14926.13           |
| A_68_P31130455 | chr17:30024049-30024093                           | NM_001081160:757   | Mdga1      | INSIDE                 | 0.665                                                        | 3.834                          | 1726.56            | 6620.00            | 2.549                          | 1531.21            | 3903.07            |
| A_68_P22822698 | chr4:32744460-32744504                            | NM_001081392:389   | Mdn1       | INSIDE                 | 0.559                                                        | 0.462                          | 2792.48            | 1291.31            | 0.259                          | 2048.41            | 529.83             |
| A_68_P31827985 | chr18:73975089-73975133                           | NM_145494:-64      | Me2        | PROMOTER               | 0.065                                                        | 57.954                         | 999.74             | 57938.87           | 3.771                          | 1008.46            | 3803.24            |
| A_68_P25308743 | chr7:96781285-96781329                            | NM_181407:-21      | Me3        | PROMOTER               | 0.553                                                        | 6.256                          | 868.71             | 5434.74            | 3.46                           | 832.44             | 2880.64            |
| A_68_P23272064 | chr4:124762396-124762440                          | NM_027310:28       | Meaf6      | INSIDE                 | 0.438                                                        | 11.852                         | 2018.53            | 23922.96           | 5.189                          | 1725.41            | 8952.98            |
| A_68_P22028773 | chr3:30407847-30407891                            | NM_021442:541      | Mecom      | INSIDE                 | 0.283                                                        | 44.123                         | 2522.00            | 111278.00          | 12.481                         | 2417.37            | 30171.52           |
| A_68_P22028772 | chr3:30407701-30407745                            | NM_021442:687      | Mecom      | INSIDE                 | 0.571                                                        | 4.660                          | 1111.47            | 5179.14            | 2.662                          | 1054.62            | 2807.00            |



| ProbeName      | Target position of probe on CpG island microarray | TargetID            | GeneSymbol | CpG island Description | Ratio of relative methylation (TiO <sub>2</sub> -NP/Vehicle) | Sham group                     |                    |                    | TiO <sub>2</sub> -H group      |                    |                    |
|----------------|---------------------------------------------------|---------------------|------------|------------------------|--------------------------------------------------------------|--------------------------------|--------------------|--------------------|--------------------------------|--------------------|--------------------|
|                |                                                   |                     |            |                        |                                                              | Relative methylation (Cy5/Cy3) | Cy3 signal (Input) | Cy5 signal (MeDIP) | Relative methylation (Cy5/Cy3) | Cy3 signal (Input) | Cy5 signal (MeDIP) |
| A_68_P32466325 | chrX:71330416-71330460                            | NM_010788:494       | Mecp2      | INSIDE                 | 0.333                                                        | 6.806                          | 2005.59            | 13650.66           | 2.263                          | 2683.14            | 6072.30            |
| A_68_P23308624 | chr4:131399356-131399400                          | NM_025297:-7        | Mecr       | DIVERGENT_PROMOTER     | 0.353                                                        | 0.426                          | 2371.23            | 1009.60            | 0.15                           | 1615.93            | 242.92             |
| A_68_P22171318 | chr3:58810124-58810168                            | NM_177855:-753      | Med12l     | PROMOTER               | 0.519                                                        | 6.773                          | 1045.86            | 7083.22            | 3.512                          | 862.56             | 3029.62            |
| A_68_P22171315 | chr3:58809811-58809855                            | NM_177855:-1067     | Med12l     | PROMOTER               | 0.532                                                        | 5.021                          | 727.95             | 3654.82            | 2.67                           | 646.12             | 1725.28            |
| A_68_P27988570 | chr11:86171604-86171648                           | NM_001080931:-599   | Med13      | PROMOTER               | 0.396                                                        | 0.385                          | 3099.33            | 1193.03            | 0.152                          | 2303.48            | 351.03             |
| A_68_P27988567 | chr11:86170969-86171013                           | NM_001080931:37     | Med13      | INSIDE                 | 0.398                                                        | 0.587                          | 2631.85            | 1543.99            | 0.233                          | 2007.40            | 468.66             |
| A_68_P24027251 | chr5:119010546-119010590                          | NM_172424:-159      | Med13l     | PROMOTER               | 0.567                                                        | 10.954                         | 1227.99            | 13451.13           | 6.208                          | 1211.00            | 7518.11            |
| A_68_P24027248 | chr5:119010105-119010149                          | NM_172424:-601      | Med13l     | PROMOTER               | 0.574                                                        | 4.604                          | 1788.46            | 8233.53            | 2.642                          | 1614.13            | 4264.57            |
| A_68_P32263511 | chrX:12338951-12338995                            | NM_001048208:127    | Med14      | INSIDE                 | 0.362                                                        | 7.268                          | 1126.92            | 8189.90            | 2.633                          | 1147.77            | 3022.10            |
| A_68_P32263512 | chrX:12339036-12339080                            | NM_001048208:41     | Med14      | INSIDE                 | 0.647                                                        | 12.249                         | 703.71             | 8619.50            | 7.926                          | 926.72             | 7345.63            |
| A_68_P30575359 | chr16:17722895-17722939                           | NM_001040683:107    | Med15      | INSIDE                 | 0.335                                                        | 4.942                          | 2261.57            | 11176.66           | 1.654                          | 1945.39            | 3218.06            |
| A_68_P27279588 | chr10:79361859-79361903                           | NM_001163276:9803   | Med16      | INSIDE                 | 0.368                                                        | 6.447                          | 3496.68            | 22542.65           | 2.37                           | 2609.92            | 6186.09            |
| A_68_P27279643 | chr10:79371605-79371649                           | NM_001163276:57     | Med16      | INSIDE                 | 0.628                                                        | 4.140                          | 5613.44            | 23242.10           | 2.599                          | 4199.47            | 10914.67           |
| A_68_P27279589 | chr10:79361980-79362024                           | NM_001163276:9681   | Med16      | INSIDE                 | 0.345                                                        | 5.165                          | 1415.33            | 7310.07            | 1.782                          | 987.21             | 1758.92            |
| A_68_P24929768 | chr6:146591129-146591173                          | NM_025315:50        | Med21      | INSIDE                 | 0.448                                                        | 0.322                          | 1672.11            | 538.97             | 0.144                          | 1195.65            | 172.62             |
| A_68_P24929770 | chr6:146591301-146591345                          | NM_025315:222       | Med21      | INSIDE                 | 0.518                                                        | 7.192                          | 900.29             | 6474.61            | 3.727                          | 781.40             | 2912.19            |
| A_68_P25089971 | chr7:52147810-52147854                            | NM_029365:-96       | Med25      | DIVERGENT_PROMOTER     | 0.219                                                        | 14.412                         | 767.19             | 11057.09           | 3.163                          | 702.40             | 2221.40            |
| A_68_P25089969 | chr7:52147509-52147554                            | NM_029365:205       | Med25      | INSIDE                 | 0.644                                                        | 3.690                          | 1616.10            | 5963.83            | 2.376                          | 1302.29            | 3094.39            |
| A_68_P25962045 | chr8:75071657-75071701                            | NM_027485:531       | Med26      | INSIDE                 | 0.629                                                        | 4.316                          | 3433.96            | 14822.61           | 2.717                          | 2819.82            | 7661.01            |
| A_68_P25962046 | chr8:75071784-75071828                            | NM_027485:403       | Med26      | INSIDE                 | 0.386                                                        | 0.637                          | 1555.40            | 991.26             | 0.246                          | 1227.26            | 302.01             |
| A_68_P23657073 | chr5:45911523-45911567                            | NM_025895:77        | Med28      | INSIDE                 | 0.661                                                        | 4.434                          | 887.68             | 3935.81            | 2.931                          | 798.95             | 2341.80            |
| A_68_P27767873 | chr11:46250861-46250905                           | NM_001104556:420    | Med7       | INSIDE                 | 0.449                                                        | 0.320                          | 1535.64            | 490.78             | 0.143                          | 1208.18            | 173.21             |
| A_68_P23240178 | chr4:118082173-118082217                          | NM_020000:253       | Med8       | INSIDE                 | 0.364                                                        | 0.255                          | 7300.01            | 1858.24            | 0.093                          | 4583.73            | 424.43             |
| A_68_P29186150 | chr13:83662891-83662935                           | NM_001170537:19880  | Me12e      | INSIDE                 | 0.24                                                         | 10.851                         | 447.23             | 4852.85            | 2.6                            | 397.83             | 1034.16            |
| A_68_P31734231 | chr18:57292496-57292540                           | NM_001001979:-225   | Megf10     | PROMOTER               | 0.296                                                        | 0.421                          | 1719.34            | 724.23             | 0.125                          | 1402.66            | 174.97             |
| A_68_P31734234 | chr18:57292707-57292751                           | NM_001001979:-15    | Megf10     | PROMOTER               | 0.445                                                        | 0.311                          | 1555.24            | 483.97             | 0.138                          | 1231.98            | 170.42             |
| A_68_P26581612 | chr9:64233974-64234018                            | NM_172522:564       | Megf11     | INSIDE                 | 0.446                                                        | 0.491                          | 1112.93            | 546.65             | 0.219                          | 961.58             | 210.45             |
| A_68_P26581610 | chr9:64233768-64233812                            | NM_172522:358       | Megf11     | INSIDE                 | 0.653                                                        | 0.398                          | 2461.38            | 978.91             | 0.26                           | 1940.60            | 503.88             |
| A_68_P23006650 | chr4:70195415-70195459                            | NM_172694:526       | Megf9      | INSIDE                 | 0.345                                                        | 10.688                         | 9060.64            | 96839.65           | 3.688                          | 6797.84            | 25067.31           |
| A_68_P23006649 | chr4:70195250-70195294                            | NM_172694:690       | Megf9      | INSIDE                 | 0.375                                                        | 0.502                          | 1621.97            | 814.94             | 0.188                          | 1403.30            | 264.15             |
| A_68_P23006657 | chr4:70196174-70196218                            | NM_172694:-234      | Megf9      | PROMOTER               | 0.508                                                        | 0.525                          | 2419.26            | 1270.32            | 0.267                          | 1789.16            | 477.34             |
| A_68_P30381264 | chr15:81900574-81900618                           | NM_028897:50        | Mei1       | INSIDE                 | 0.456                                                        | 0.639                          | 2524.80            | 1612.69            | 0.291                          | 1856.49            | 540.84             |
| A_68_P27622849 | chr11:18771565-18771609                           | NM_001193271:147386 | Meis1      | DOWNSTREAM             | 0.068                                                        | 3.225                          | 1238.52            | 3993.78            | 0.219                          | 978.72             | 214.57             |
| A_68_P24980083 | chr7:16760918-16760963                            | NM_008627:212       | Meis3      | INSIDE                 | 0.601                                                        | 2.696                          | 2076.52            | 5598.79            | 1.621                          | 1699.10            | 2753.68            |
| A_68_P31350850 | chr17:74695143-74695187                           | NM_133771:-961      | Memo1      | PROMOTER               | 0.011                                                        | 207.364                        | 483.88             | 100338.60          | 2.384                          | 378.21             | 901.76             |
| A_68_P31934033 | chr19:6335488-6335532                             | NM_001168490:472    | Men1       | INSIDE                 | 0.449                                                        | 0.572                          | 2322.96            | 1328.83            | 0.257                          | 1852.07            | 475.28             |
| A_68_P31934035 | chr19:6335704-6335748                             | NM_001168490:688    | Men1       | INSIDE                 | 0.545                                                        | 0.373                          | 3440.46            | 1284.85            | 0.203                          | 2377.57            | 483.65             |
| A_68_P24127560 | chr5:138227659-138227706                          | NM_144913:247       | Mepce      | INSIDE                 | 0.271                                                        | 1.531                          | 1876.04            | 2872.39            | 0.414                          | 1473.01            | 610.09             |
| A_68_P25285350 | chr7:91040523-91040567                            | NM_023403:35        | Mesdc2     | INSIDE                 | 0.363                                                        | 0.368                          | 4649.86            | 1710.77            | 0.134                          | 3282.50            | 438.40             |
| A_68_P22569096 | chr3:138152576-138152620                          | NM_175224:-252      | Metap1     | PROMOTER               | 0.58                                                         | 2.519                          | 2898.86            | 7303.55            | 1.461                          | 2628.67            | 3840.67            |
| A_68_P27356283 | chr10:93351892-93351936                           | NM_019648:2033      | Metap2     | INSIDE                 | 0.073                                                        | 5.984                          | 1524.46            | 9121.76            | 0.435                          | 1393.16            | 605.72             |
| A_68_P31106324 | chr17:25934049-25934093                           | NM_133719:-80       | Metrm      | PROMOTER               | 0.331                                                        | 6.469                          | 1534.53            | 9926.76            | 2.144                          | 1235.68            | 2648.81            |
| A_68_P31106322 | chr17:25933806-25933850                           | NM_133719:162       | Metrm      | INSIDE                 | 0.523                                                        | 3.659                          | 784.81             | 2872.02            | 1.914                          | 649.88             | 1243.57            |
| A_68_P28192109 | chr11:121564851-121564895                         | NM_144797:1132      | Metml      | INSIDE                 | 0.415                                                        | 4.695                          | 2930.29            | 13758.20           | 1.948                          | 2296.79            | 4473.20            |
| A_68_P28192096 | chr11:121563476-121563520                         | NM_144797:-242      | Metml      | PROMOTER               | 0.527                                                        | 0.626                          | 1307.78            | 818.99             | 0.33                           | 1028.24            | 339.53             |
| A_68_P27533648 | chr10:126479103-126479147                         | NM_010792:137       | Mettl1     | INSIDE                 | 0.633                                                        | 0.627                          | 2430.18            | 1524.16            | 0.397                          | 1794.65            | 712.88             |

| ProbeName      | Target position of probe on CpG island microarray | TargetID           | GeneSymbol | CpG island Description | Ratio of relative methylation (TiO <sub>2</sub> -NP/Vehicle) | Sham group                     |                    |                    | TiO <sub>2</sub> -H group      |                    |                    |
|----------------|---------------------------------------------------|--------------------|------------|------------------------|--------------------------------------------------------------|--------------------------------|--------------------|--------------------|--------------------------------|--------------------|--------------------|
|                |                                                   |                    |            |                        |                                                              | Relative methylation (Cy5/Cy3) | Cy3 signal (Input) | Cy5 signal (MeDIP) | Relative methylation (Cy5/Cy3) | Cy3 signal (Input) | Cy5 signal (MeDIP) |
| A_68_P21105336 | chr2:30663318-30663362                            | NM_170592:-156     | Mettl1a    | DIVERGENT_PROMOTER     | 0.455                                                        | 0.492                          | 14256.57           | 7010.46            | 0.224                          | 9464.63            | 2118.77            |
| A_68_P21105338 | chr2:30663536-30663580                            | NM_170592:62       | Mettl1a    | INSIDE                 | 0.586                                                        | 0.308                          | 2271.22            | 700.12             | 0.181                          | 1511.78            | 273.12             |
| A_68_P21105337 | chr2:30663394-30663438                            | NM_170592:-80      | Mettl1a    | DIVERGENT_PROMOTER     | 0.665                                                        | 0.601                          | 7065.78            | 4245.08            | 0.4                            | 4800.18            | 1919.04            |
| A_68_P21105335 | chr2:30663189-30663233                            | NM_170592:-286     | Mettl1a    | DIVERGENT_PROMOTER     | 0.201                                                        | 1.357                          | 10787.37           | 14634.56           | 0.273                          | 6626.55            | 1811.21            |
| A_68_P20778372 | chr1:164478561-164478605                          | NM_144877:-106     | Mettl13    | PROMOTER               | 0.391                                                        | 7.228                          | 7653.33            | 55318.14           | 2.827                          | 6438.02            | 18203.18           |
| A_68_P20778374 | chr1:164478713-164478757                          | NM_144877:-258     | Mettl13    | PROMOTER               | 0.556                                                        | 0.266                          | 2041.11            | 543.14             | 0.148                          | 1589.47            | 234.96             |
| A_68_P22487800 | chr3:123088652-123088696                          | NM_201638:234      | Mettl14    | INSIDE                 | 0.299                                                        | 22.576                         | 7098.51            | 160259.20          | 6.744                          | 6139.90            | 41409.68           |
| A_68_P28515346 | chr12:70683995-70684039                           | NM_001033236:-1    | Mettl21d   | PROMOTER               | 0.495                                                        | 6.730                          | 2074.78            | 13964.01           | 3.334                          | 1792.66            | 5976.00            |
| A_68_P28515345 | chr12:70683875-70683919                           | NM_001033236:119   | Mettl21d   | INSIDE                 | 0.607                                                        | 0.739                          | 3309.30            | 2446.31            | 0.449                          | 2583.72            | 1159.55            |
| A_68_P30532721 | chr16:8470714-8470758                             | NM_146247:-169     | Mettl22    | PROMOTER               | 0.404                                                        | 0.587                          | 902.31             | 529.68             | 0.237                          | 721.61             | 171.24             |
| A_68_P29605899 | chr14:52924704-52924752                           | NM_019721:71       | Mettl3     | INSIDE                 | 0.38                                                         | 8.202                          | 464.47             | 3809.81            | 3.115                          | 445.29             | 1387.14            |
| A_68_P25471703 | chr7:128178649-128178693                          | NM_021554:712      | Mettl9     | INSIDE                 | 0.325                                                        | 29.657                         | 1473.10            | 43687.54           | 9.653                          | 1359.53            | 13123.49           |
| A_68_P22314306 | chr3:88335633-88335677                            | NM_001029890:-662  | Mex3a      | PROMOTER               | 0.324                                                        | 0.324                          | 2523.85            | 817.24             | 0.105                          | 1608.53            | 168.89             |
| A_68_P25279941 | chr7:90014673-90014717                            | NM_175366:-1148    | Mex3b      | PROMOTER               | 0.359                                                        | 11.848                         | 4563.36            | 54066.36           | 4.249                          | 3655.66            | 15533.36           |
| A_68_P31826505 | chr18:73732011-73732055                           | NM_001039214:-326  | Mex3c      | PROMOTER               | 0.63                                                         | 2.335                          | 3205.79            | 7486.07            | 1.471                          | 2393.53            | 3519.73            |
| A_68_P27282830 | chr10:79844326-79844370                           | NM_198615:6048     | Mex3d      | INSIDE                 | 0.415                                                        | 4.248                          | 2981.56            | 12666.68           | 1.763                          | 2229.36            | 3930.02            |
| A_68_P27282834 | chr10:79844741-79844785                           | NM_198615:5634     | Mex3d      | INSIDE                 | 0.481                                                        | 4.090                          | 1338.10            | 5472.92            | 1.967                          | 1183.66            | 2328.33            |
| A_68_P27282831 | chr10:79844492-79844536                           | NM_198615:5882     | Mex3d      | INSIDE                 | 0.619                                                        | 9.614                          | 1963.34            | 18875.82           | 5.948                          | 1617.24            | 9619.99            |
| A_68_P27282840 | chr10:79845290-79845334                           | NM_198615:5084     | Mex3d      | INSIDE                 | 0.586                                                        | 3.033                          | 1828.09            | 5545.13            | 1.779                          | 1390.87            | 2473.99            |
| A_68_P27282875 | chr10:79849919-79849963                           | NM_198615:456      | Mex3d      | INSIDE                 | 0.405                                                        | 4.259                          | 1618.70            | 6894.82            | 1.726                          | 1281.50            | 2212.50            |
| A_68_P27282838 | chr10:79845116-79845160                           | NM_198615:5258     | Mex3d      | INSIDE                 | 0.665                                                        | 2.585                          | 1483.80            | 3836.13            | 1.72                           | 1265.13            | 2175.79            |
| A_68_P27826025 | chr11:57332162-57332206                           | NM_145426:18       | Mfap3      | INSIDE                 | 0.542                                                        | 0.549                          | 1153.51            | 633.80             | 0.298                          | 894.00             | 266.29             |
| A_68_P25259449 | chr7:86294014-86294058                            | NM_001045489:-90   | Mfige8     | PROMOTER               | 0.583                                                        | 2.674                          | 1049.42            | 2805.85            | 1.558                          | 996.58             | 1552.77            |
| A_68_P25780633 | chr8:36651446-36651490                            | NM_001081279:617   | Mfhas1     | INSIDE                 | 0.49                                                         | 4.894                          | 1282.15            | 6274.51            | 2.397                          | 1018.45            | 2441.56            |
| A_68_P22038555 | chr3:32428477-32428521                            | NM_024200:95       | Mfn1       | INSIDE                 | 0.532                                                        | 6.202                          | 1423.26            | 8826.69            | 3.302                          | 1215.48            | 4013.24            |
| A_68_P22038556 | chr3:32428603-32428647                            | NM_024200:221      | Mfn1       | INSIDE                 | 0.523                                                        | 0.719                          | 1559.33            | 1120.53            | 0.376                          | 1280.93            | 481.22             |
| A_68_P23972004 | chr5:108877831-108877875                          | NM_172883:58       | Mfsd7a     | INSIDE                 | 0.316                                                        | 0.481                          | 1601.26            | 770.51             | 0.152                          | 1137.43            | 173.18             |
| A_68_P20173639 | chr1:40847463-40847507                            | NM_172499:18       | Mfsd9      | INSIDE                 | 0.26                                                         | 21.933                         | 1135.89            | 24914.04           | 5.703                          | 1020.09            | 5817.75            |
| A_68_P21571997 | chr2:119722828-119722872                          | NM_001164274:-113  | Mga        | PROMOTER               | 0.257                                                        | 1.553                          | 748.40             | 1162.07            | 0.399                          | 716.30             | 285.85             |
| A_68_P27782124 | chr11:49064057-49064101                           | NM_001110150:25    | Mgat1      | INSIDE                 | 0.353                                                        | 0.641                          | 1759.78            | 1127.20            | 0.226                          | 1426.98            | 322.38             |
| A_68_P27782066 | chr11:49057568-49057612                           | NM_001110148:-102  | Mgat1      | PROMOTER               | 0.642                                                        | 0.719                          | 3484.12            | 2505.13            | 0.462                          | 2583.02            | 1192.59            |
| A_68_P27782067 | chr11:49057649-49057693                           | NM_001110148:-22   | Mgat1      | PROMOTER               | 0.392                                                        | 1.618                          | 2096.80            | 3391.97            | 0.634                          | 1877.30            | 1190.87            |
| A_68_P27787453 | chr11:50044668-50044712                           | NM_145926:5854     | Mgat4b     | INSIDE                 | 0.336                                                        | 6.424                          | 1667.52            | 10712.42           | 2.158                          | 1380.60            | 2978.72            |
| A_68_P24623660 | chr6:88674554-88674598                            | NM_001166250:-121  | Mgll       | PROMOTER               | 0.236                                                        | 23.515                         | 2426.83            | 57065.65           | 5.551                          | 2399.63            | 13320.86           |
| A_68_P25562263 | chr7:144086164-144086208                          | NM_008598:-107     | Mgmt       | PROMOTER               | 0.357                                                        | 0.319                          | 4903.22            | 1561.85            | 0.114                          | 3218.98            | 365.64             |
| A_68_P30512463 | chr16:4886291-4886335                             | NM_029657:61       | Mgmn1      | INSIDE                 | 0.379                                                        | 0.675                          | 1999.47            | 1348.68            | 0.256                          | 1458.57            | 372.85             |
| A_68_P23990789 | chr5:112656382-112656426                          | NR_003718:1564     | Miat       | INSIDE                 | 0.273                                                        | 11.438                         | 2965.05            | 33913.02           | 3.123                          | 2685.93            | 8388.19            |
| A_68_P23439858 | chr4:155028864-155028908                          | NM_145124:14450    | Mib2       | INSIDE                 | 0.592                                                        | 3.094                          | 4077.96            | 12616.73           | 1.83                           | 3209.32            | 5874.58            |
| A_68_P32252887 | chrX:10294418-10294462                            | NM_001166635:-50   | Mid1ip1    | PROMOTER               | 0.393                                                        | 5.153                          | 992.00             | 5111.38            | 2.025                          | 1198.99            | 2427.40            |
| A_68_P27281298 | chr10:79613010-79613054                           | NM_021565:1998     | Midn       | INSIDE                 | 0.46                                                         | 0.442                          | 1167.17            | 515.82             | 0.203                          | 838.52             | 170.42             |
| A_68_P27281304 | chr10:79613780-79613824                           | NM_021565:2768     | Midn       | INSIDE                 | 0.635                                                        | 0.378                          | 2704.66            | 1022.79            | 0.24                           | 1938.29            | 465.59             |
| A_68_P27281299 | chr10:79613231-79613275                           | NM_021565:2218     | Midn       | INSIDE                 | 0.405                                                        | 5.276                          | 771.29             | 4069.55            | 2.134                          | 644.93             | 1376.46            |
| A_68_P23164325 | chr4:102787321-102787365                          | NM_001039081:-4652 | Mier1      | PROMOTER               | 0.068                                                        | 78.630                         | 8987.55            | 706694.20          | 5.339                          | 14019.98           | 74855.87           |
| A_68_P23164324 | chr4:102787243-102787287                          | NM_001039081:-4730 | Mier1      | PROMOTER               | 0.169                                                        | 11.293                         | 1428.35            | 16129.76           | 1.914                          | 1298.23            | 2484.75            |
| A_68_P23164323 | chr4:102787124-102787168                          | NM_001039081:-4848 | Mier1      | PROMOTER               | 0.616                                                        | 0.396                          | 2024.81            | 802.00             | 0.244                          | 1560.07            | 380.56             |
| A_68_P27277569 | chr10:79017872-79017916                           | NM_027422:-58      | Mier2      | PROMOTER               | 0.281                                                        | 9.772                          | 1987.07            | 19417.24           | 2.747                          | 1702.44            | 4676.65            |

| ProbeName      | Target position of probe on CpG island microarray | TargetID        | GeneSymbol | CpG island Description | Ratio of relative methylation (TiO <sub>2</sub> -NP/Vehicle) | Sham group                     |                    |                    | TiO <sub>2</sub> -H group      |                    |                    |
|----------------|---------------------------------------------------|-----------------|------------|------------------------|--------------------------------------------------------------|--------------------------------|--------------------|--------------------|--------------------------------|--------------------|--------------------|
|                |                                                   |                 |            |                        |                                                              | Relative methylation (Cy5/Cy3) | Cy3 signal (Input) | Cy5 signal (MeDIP) | Relative methylation (Cy5/Cy3) | Cy3 signal (Input) | Cy5 signal (MeDIP) |
| A_68_P29330297 | chr13:112515612-112515656                         | NM_172593:39249 | Mier3      | DOWNSTREAM             | 0.389                                                        | 7.064                          | 3966.04            | 28016.35           | 2.747                          | 3560.39            | 9779.19            |
| A_68_P27259065 | chr10:75322775-75322819                           | NM_010798:199   | Mif        | INSIDE                 | 0.542                                                        | 0.475                          | 1509.09            | 717.50             | 0.258                          | 1209.83            | 311.87             |
| A_68_P28154418 | chr11:115474202-115474246                         | NM_027162:-407  | Mif4gd     | PROMOTER               | 0.261                                                        | 0.463                          | 2170.12            | 1004.82            | 0.121                          | 1415.03            | 171.14             |
| A_68_P28154417 | chr11:115474024-115474068                         | NM_027162:-229  | Mif4gd     | PROMOTER               | 0.529                                                        | 3.364                          | 5090.39            | 17126.30           | 1.78                           | 3803.94            | 6772.08            |
| A_68_P28154416 | chr11:115473786-115473830                         | NM_027162:9     | Mif4gd     | INSIDE                 | 0.563                                                        | 5.152                          | 1432.34            | 7378.98            | 2.9                            | 1192.50            | 3458.37            |
| A_68_P32070425 | chr19:32560187-32560231                           | NM_010799:-50   | Minpp1     | PROMOTER               | 0.502                                                        | 4.073                          | 1788.69            | 7284.71            | 2.045                          | 1481.25            | 3029.60            |
| A_68_P32383984 | chrX:50097577-50097621                            | NR_029657:-1854 | Mir106a    | PROMOTER               | 0.522                                                        | 3.244                          | 599.85             | 1945.72            | 1.692                          | 706.81             | 1196.03            |
| A_68_P32016082 | chr19:23215759-23215803                           | NR_035423:-8140 | Mir1192    | PROMOTER               | 0.135                                                        | 2.117                          | 2850.82            | 6035.95            | 0.285                          | 2397.44            | 683.85             |
| A_68_P32016092 | chr19:23216941-23216985                           | NR_035423:-6958 | Mir1192    | PROMOTER               | 0.44                                                         | 0.689                          | 1602.14            | 1103.53            | 0.303                          | 1236.50            | 374.51             |
| A_68_P26017626 | chr8:86535448-86535492                            | NR_035431:62    | Mir1199    | INSIDE                 | 0.602                                                        | 6.003                          | 1483.23            | 8903.27            | 3.613                          | 1231.41            | 4449.27            |
| A_68_P29668497 | chr14:65206255-65206299                           | NR_029813:-3217 | Mir124a-1  | PROMOTER               | 0.624                                                        | 4.732                          | 6463.42            | 30587.16           | 2.952                          | 4681.80            | 13821.97           |
| A_68_P21906910 | chr2:180629073-180629117                          | NR_029538:350   | Mir124a-3  | DOWNSTREAM             | 0.082                                                        | 2.607                          | 2188.73            | 5704.96            | 0.215                          | 1497.18            | 321.85             |
| A_68_P21394386 | chr2:84583579-84583623                            | NR_029544:-2265 | Mir130a    | PROMOTER               | 0.53                                                         | 0.243                          | 3999.71            | 972.34             | 0.129                          | 2696.91            | 347.57             |
| A_68_P24443350 | chr6:51220702-51220746                            | NR_029719:-815  | Mir148a    | PROMOTER               | 0.654                                                        | 2.823                          | 1500.36            | 4235.41            | 1.846                          | 1341.47            | 2476.02            |
| A_68_P20451522 | chr1:94745253-94745297                            | NR_029559:-1680 | Mir149     | PROMOTER               | 0.212                                                        | 1.869                          | 1413.57            | 2641.83            | 0.397                          | 1053.88            | 418.04             |
| A_68_P28047118 | chr11:96711362-96711406                           | NR_029562:-322  | Mir152     | PROMOTER               | 0.15                                                         | 1.480                          | 1673.31            | 2476.48            | 0.222                          | 1299.06            | 287.93             |
| A_68_P22218631 | chr3:68809558-68809602                            | NR_029529:-4113 | Mir15b     | PROMOTER               | 0.491                                                        | 3.919                          | 2074.32            | 8129.82            | 1.926                          | 1601.53            | 3084.00            |
| A_68_P22218636 | chr3:68810008-68810052                            | NR_029529:-3663 | Mir15b     | PROMOTER               | 0.453                                                        | 3.436                          | 1325.60            | 4555.37            | 1.555                          | 1013.98            | 1576.99            |
| A_68_P29919366 | chr14:115439544-115439588                         | NR_029785:-3326 | Mir17      | PROMOTER               | 0.522                                                        | 7.460                          | 1236.85            | 9226.71            | 3.893                          | 1052.90            | 4098.61            |
| A_68_P26018642 | chr8:86707908-86707952                            | NR_029821:-5070 | Mir181c    | PROMOTER               | 0.154                                                        | 35.978                         | 2565.51            | 92301.31           | 5.531                          | 2143.91            | 11858.40           |
| A_68_P26345157 | chr9:20837581-20837625                            | NR_035438:-830  | Mir1900    | PROMOTER               | 0.353                                                        | 6.031                          | 1219.11            | 7352.60            | 2.128                          | 1048.80            | 2231.68            |
| A_68_P27950594 | chr11:79524651-79524695                           | NR_029579:-798  | Mir193     | PROMOTER               | 0.343                                                        | 0.574                          | 2333.21            | 1338.17            | 0.197                          | 1682.25            | 330.58             |
| A_68_P27950601 | chr11:79525364-79525408                           | NR_029579:-84   | Mir193     | PROMOTER               | 0.408                                                        | 8.319                          | 1919.16            | 15965.01           | 3.39                           | 1763.23            | 5977.24            |
| A_68_P27950596 | chr11:79524897-79524941                           | NR_029579:-552  | Mir193     | PROMOTER               | 0.503                                                        | 3.155                          | 2151.72            | 6787.75            | 1.588                          | 1604.22            | 2547.16            |
| A_68_P27351984 | chr10:92624465-92624509                           | NR_035452:-1043 | Mir1931    | PROMOTER               | 0.221                                                        | 0.520                          | 1980.92            | 1030.74            | 0.115                          | 1526.86            | 175.96             |
| A_68_P30557335 | chr16:13448659-13448703                           | NR_030549:-935  | Mir193b    | PROMOTER               | 0.609                                                        | 0.375                          | 3612.55            | 1354.05            | 0.228                          | 2414.28            | 550.95             |
| A_68_P29240037 | chr13:96095372-96095416                           | NR_035461:-5140 | Mir1940    | PROMOTER               | 0.584                                                        | 0.391                          | 2515.05            | 983.47             | 0.228                          | 1988.06            | 453.93             |
| A_68_P26134879 | chr8:108137855-108137899                          | NR_035492:-1489 | Mir1966    | PROMOTER               | 0.474                                                        | 0.424                          | 1902.82            | 807.42             | 0.201                          | 1425.43            | 286.68             |
| A_68_P26134826 | chr8:108129362-108129406                          | NR_035492:-9981 | Mir1966    | PROMOTER               | 0.557                                                        | 5.655                          | 2094.24            | 11843.50           | 3.152                          | 1923.98            | 6065.27            |
| A_68_P26134881 | chr8:108138096-108138140                          | NR_035492:-1247 | Mir1966    | PROMOTER               | 0.3                                                          | 4.987                          | 1410.42            | 7033.62            | 1.497                          | 1456.10            | 2179.66            |
| A_68_P27285698 | chr10:80289762-80289807                           | NR_035503:-1757 | Mir1982    | PROMOTER               | 0.225                                                        | 2.117                          | 1332.34            | 2821.00            | 0.475                          | 1191.13            | 566.24             |
| A_68_P21114613 | chr2:32168350-32168394                            | NR_029811:-5607 | Mir199b    | PROMOTER               | 0.256                                                        | 0.499                          | 1975.35            | 985.17             | 0.128                          | 1366.12            | 174.74             |
| A_68_P21114609 | chr2:32167955-32167999                            | NR_029811:-6003 | Mir199b    | PROMOTER               | 0.505                                                        | 9.639                          | 12622.64           | 121668.10          | 4.871                          | 11254.23           | 54814.25           |
| A_68_P21114610 | chr2:32168059-32168103                            | NR_029811:-5899 | Mir199b    | PROMOTER               | 0.627                                                        | 7.410                          | 8050.30            | 59652.90           | 4.646                          | 7124.71            | 33104.31           |
| A_68_P22858433 | chr4:40669503-40669547                            | NR_029594:-425  | Mir207     | PROMOTER               | 0.534                                                        | 0.416                          | 2240.52            | 932.07             | 0.222                          | 1810.04            | 402.07             |
| A_68_P27924625 | chr11:74986839-74986883                           | NR_029794:-29   | Mir212     | DIVERGENT_PROMOTER     | 0.664                                                        | 0.458                          | 2659.01            | 1216.68            | 0.304                          | 2133.01            | 648.50             |
| A_68_P31151557 | chr17:34162040-34162084                           | NR_029800:-25   | Mir219-1   | PROMOTER               | 0.527                                                        | 0.510                          | 3497.10            | 1782.51            | 0.269                          | 2712.00            | 729.12             |
| A_68_P21099810 | chr2:29702001-29702045                            | NR_029838:-775  | Mir219-2   | PROMOTER               | 0.307                                                        | 0.472                          | 1777.47            | 839.54             | 0.145                          | 1395.19            | 202.49             |
| A_68_P21099803 | chr2:29701365-29701409                            | NR_029838:-139  | Mir219-2   | PROMOTER               | 0.437                                                        | 0.521                          | 2170.48            | 1130.39            | 0.227                          | 1655.25            | 376.32             |
| A_68_P21099801 | chr2:29701142-29701186                            | NR_029838:83    | Mir219-2   | INSIDE                 | 0.587                                                        | 0.593                          | 1855.13            | 1099.99            | 0.348                          | 1225.98            | 426.75             |
| A_68_P21099804 | chr2:29701460-29701504                            | NR_029838:-235  | Mir219-2   | PROMOTER               | 0.577                                                        | 0.692                          | 1390.36            | 962.22             | 0.399                          | 1038.93            | 414.75             |
| A_68_P26018712 | chr8:86722479-86722523                            | NR_029740:-9916 | Mir23a     | PROMOTER               | 0.448                                                        | 0.489                          | 950.20             | 464.79             | 0.219                          | 791.79             | 173.66             |
| A_68_P20348302 | chr1:74438798-74438842                            | NR_029743:-2063 | Mir26b     | PROMOTER               | 0.51                                                         | 4.748                          | 921.21             | 4374.18            | 2.422                          | 1016.16            | 2461.35            |
| A_68_P27365819 | chr10:95026630-95026674                           | NR_037212:-4697 | Mir3058    | PROMOTER               | 0.382                                                        | 11.846                         | 6512.50            | 77149.59           | 4.524                          | 5507.76            | 24914.77           |
| A_68_P28103517 | chr11:106649497-106649541                         | NR_037224:-5445 | Mir3064    | PROMOTER               | 0.658                                                        | 0.618                          | 1386.18            | 856.41             | 0.407                          | 1113.61            | 452.82             |
| A_68_P28269969 | chr12:17355438-17355482                           | NR_037226:-6737 | Mir3066    | PROMOTER               | 0.609                                                        | 3.440                          | 695.59             | 2392.72            | 2.094                          | 625.64             | 1310.29            |

| ProbeName      | Target position of probe on CpG island microarray | TargetID          | GeneSymbol | CpG island Description | Ratio of relative methylation (TiO <sub>2</sub> -NP/Vehicle) | Sham group                     |                    |                    | TiO <sub>2</sub> -H group      |                    |                    |
|----------------|---------------------------------------------------|-------------------|------------|------------------------|--------------------------------------------------------------|--------------------------------|--------------------|--------------------|--------------------------------|--------------------|--------------------|
|                |                                                   |                   |            |                        |                                                              | Relative methylation (Cy5/Cy3) | Cy3 signal (Input) | Cy5 signal (MeDIP) | Relative methylation (Cy5/Cy3) | Cy3 signal (Input) | Cy5 signal (MeDIP) |
| A_68_P21104807 | chr2:30567268-30567312                            | NR_037272:-9439   | Mir3089    | PROMOTER               | 0.532                                                        | 2.774                          | 1801.34            | 4996.17            | 1.475                          | 1524.28            | 2248.08            |
| A_68_P22312502 | chr3:88018703-88018747                            | NR_037276:-368    | Mir3093    | PROMOTER               | 0.446                                                        | 5.834                          | 1698.19            | 9907.63            | 2.605                          | 1520.88            | 3961.46            |
| A_68_P25015934 | chr7:27963629-27963675                            | NR_037283:-2540   | Mir3101    | PROMOTER               | 0.539                                                        | 4.982                          | 10559.19           | 52603.08           | 2.687                          | 8140.43            | 21874.99           |
| A_68_P24333876 | chr6:30688404-30688448                            | NR_029900:-2872   | Mir335     | PROMOTER               | 0.454                                                        | 4.972                          | 1778.62            | 8842.73            | 2.255                          | 1396.31            | 3149.37            |
| A_68_P24135185 | chr5:139847981-139848025                          | NR_029768:-2303   | Mir339     | DIVERGENT_PROMOTER     | 0.432                                                        | 6.893                          | 2605.73            | 17960.72           | 2.975                          | 2316.27            | 6890.47            |
| A_68_P24992976 | chr7:19967388-19967432                            | NR_030759:-4581   | Mir343     | PROMOTER               | 0.579                                                        | 0.580                          | 1264.71            | 733.48             | 0.336                          | 856.33             | 287.71             |
| A_68_P30501452 | chr15:102844615-102844659                         | NR_030526:-704    | Mir615     | PROMOTER               | 0.233                                                        | 0.451                          | 2250.72            | 1016.11            | 0.105                          | 1616.05            | 170.20             |
| A_68_P30501459 | chr15:102845371-102845415                         | NR_030526:52      | Mir615     | INSIDE                 | 0.107                                                        | 1.368                          | 1575.52            | 2155.29            | 0.146                          | 1185.42            | 172.81             |
| A_68_P27539432 | chr10:127520351-127520395                         | NR_030442:-1969   | Mir677     | PROMOTER               | 0.665                                                        | 0.680                          | 1073.80            | 729.65             | 0.452                          | 953.85             | 430.86             |
| A_68_P32240004 | chrX:7327982-7328026                              | NR_030454:-2210   | Mir684-1   | DIVERGENT_PROMOTER     | 0.325                                                        | 9.805                          | 1351.43            | 13251.11           | 3.191                          | 1453.31            | 4637.30            |
| A_68_P29613301 | chr14:55236421-55236465                           | NR_030457:-820    | Mir686     | PROMOTER               | 0.523                                                        | 0.371                          | 1791.10            | 664.04             | 0.194                          | 1399.46            | 271.10             |
| A_68_P30499098 | chr15:102502893-102502944                         | NR_030460:-621    | Mir688     | PROMOTER               | 0.36                                                         | 0.356                          | 1943.08            | 691.15             | 0.128                          | 1370.69            | 175.41             |
| A_68_P24796449 | chr6:119987179-119987223                          | NR_030487:-2871   | Mir706     | PROMOTER               | 0.648                                                        | 3.767                          | 1164.46            | 4386.17            | 2.442                          | 1011.95            | 2470.71            |
| A_68_P22481656 | chr3:121996594-121996638                          | NR_030439:5       | Mir760     | INSIDE                 | 0.24                                                         | 14.696                         | 1904.45            | 27988.15           | 3.524                          | 1758.36            | 6195.61            |
| A_68_P22481653 | chr3:121996304-121996348                          | NR_030439:295     | Mir760     | DOWNSTREAM             | 0.63                                                         | 6.174                          | 369.96             | 2284.23            | 3.889                          | 333.02             | 1295.04            |
| A_68_P25506858 | chr7:134851780-134851824                          | NR_030428:-198    | Mir762     | PROMOTER               | 0.655                                                        | 0.576                          | 3874.50            | 2231.45            | 0.377                          | 2650.16            | 999.48             |
| A_68_P27788127 | chr11:50172534-50172578                           | NR_030529:-1175   | Mir804     | PROMOTER               | 0.354                                                        | 0.458                          | 1285.94            | 589.24             | 0.162                          | 1061.14            | 172.00             |
| A_68_P27788131 | chr11:50172882-50172926                           | NR_030529:-1523   | Mir804     | PROMOTER               | 0.557                                                        | 3.018                          | 2423.16            | 7313.91            | 1.68                           | 2167.61            | 3642.37            |
| A_68_P29187684 | chr13:83884882-83884926                           | NR_029545:6486    | Mir9-2     | DOWNSTREAM             | 0.571                                                        | 0.320                          | 1365.76            | 436.55             | 0.183                          | 1116.82            | 203.96             |
| A_68_P25261415 | chr7:86644791-86644835                            | NR_029818:-5337   | Mir9-3     | PROMOTER               | 0.465                                                        | 4.863                          | 1401.78            | 6817.46            | 2.263                          | 1269.49            | 2872.94            |
| A_68_P25261466 | chr7:86650289-86650333                            | NR_029818:161     | Mir9-3     | DOWNSTREAM             | 0.556                                                        | 4.021                          | 2681.78            | 10783.01           | 2.237                          | 2071.92            | 4634.22            |
| A_68_P25261496 | chr7:86653957-86654001                            | NR_029818:3829    | Mir9-3     | DOWNSTREAM             | 0.576                                                        | 0.646                          | 957.89             | 618.69             | 0.372                          | 714.33             | 265.87             |
| A_68_P29020011 | chr13:48641397-48641441                           | NR_029725:-7777   | Mirlet7a-1 | PROMOTER               | 0.186                                                        | 24.817                         | 3161.68            | 78462.14           | 4.619                          | 3116.20            | 14394.91           |
| A_68_P29020016 | chr13:48641931-48641975                           | NR_029725:-8311   | Mirlet7a-1 | PROMOTER               | 0.548                                                        | 0.705                          | 1778.10            | 1253.01            | 0.386                          | 1349.95            | 521.60             |
| A_68_P27903938 | chr11:70833216-70833260                           | NM_025993:126     | Mis12      | INSIDE                 | 0.506                                                        | 0.395                          | 2180.90            | 861.40             | 0.2                            | 1619.85            | 323.94             |
| A_68_P28494358 | chr12:66273553-66273597                           | NM_172578:-7      | Mis18bp1   | PROMOTER               | 0.151                                                        | 1.714                          | 1115.66            | 1912.74            | 0.259                          | 860.45             | 222.84             |
| A_68_P30556199 | chr16:13256418-13256462                           | NM_001122667:-133 | Mkl2       | PROMOTER               | 0.35                                                         | 6.790                          | 1629.00            | 11061.32           | 2.373                          | 1423.55            | 3378.69            |
| A_68_P30556205 | chr16:13257041-13257085                           | NM_181860:-8109   | Mkl2       | PROMOTER               | 0.419                                                        | 6.948                          | 4866.64            | 33813.50           | 2.909                          | 4367.76            | 12706.97           |
| A_68_P24337493 | chr6:31348815-31348859                            | NM_013791:9       | Mkln1      | INSIDE                 | 0.5                                                          | 11.424                         | 1393.73            | 15922.24           | 5.718                          | 1263.86            | 7226.32            |
| A_68_P24337499 | chr6:31349464-31349508                            | NM_013791:659     | Mkln1      | INSIDE                 | 0.531                                                        | 7.922                          | 3078.64            | 24390.51           | 4.206                          | 2695.41            | 11336.19           |
| A_68_P23226097 | chr4:115511687-115511731                          | NM_021461:-142    | Mknk1      | PROMOTER               | 0.654                                                        | 0.252                          | 2571.17            | 647.09             | 0.165                          | 1830.83            | 301.43             |
| A_68_P27284768 | chr10:80139566-80139610                           | NM_021462:-4867   | Mknk2      | PROMOTER               | 0.663                                                        | 2.198                          | 1743.27            | 3831.17            | 1.457                          | 1275.95            | 1858.43            |
| A_68_P24383013 | chr6:39369919-39369963                            | NM_018810:428     | Mkm1       | INSIDE                 | 0.492                                                        | 5.929                          | 1726.04            | 10234.14           | 2.919                          | 1386.34            | 4046.18            |
| A_68_P24383009 | chr6:39369612-39369656                            | NM_018810:734     | Mkm1       | INSIDE                 | 0.545                                                        | 8.420                          | 888.00             | 7477.02            | 4.587                          | 747.60             | 3429.44            |
| A_68_P24383012 | chr6:39369835-39369879                            | NM_018810:512     | Mkm1       | INSIDE                 | 0.576                                                        | 3.823                          | 1502.98            | 5745.59            | 2.202                          | 1241.75            | 2733.98            |
| A_68_P25169129 | chr7:69564808-69564852                            | NM_011746:195     | Mkm3       | INSIDE                 | 0.604                                                        | 3.751                          | 1084.06            | 4065.90            | 2.265                          | 935.21             | 2118.52            |
| A_68_P22209745 | chr3:67177879-67177923                            | NM_001039543:-118 | Mif1       | PROMOTER               | 0.433                                                        | 0.610                          | 847.54             | 517.09             | 0.264                          | 675.31             | 178.20             |
| A_68_P24817835 | chr6:124881155-124881199                          | NM_001170341:-229 | Mif2       | PROMOTER               | 0.516                                                        | 3.473                          | 3810.56            | 13234.11           | 1.79                           | 3364.47            | 6024.08            |
| A_68_P24817834 | chr6:124881062-124881106                          | NM_001170341:-321 | Mif2       | PROMOTER               | 0.098                                                        | 4.947                          | 1295.76            | 6410.00            | 0.484                          | 1205.14            | 583.07             |
| A_68_P26167758 | chr8:113861821-113861865                          | NM_029005:-39     | Mik1       | PROMOTER               | 0.279                                                        | 0.402                          | 2063.93            | 830.33             | 0.112                          | 1514.28            | 170.23             |
| A_68_P23536416 | chr5:22940274-22940318                            | NM_026984:50      | Mil5       | INSIDE                 | 0.498                                                        | 3.551                          | 1255.26            | 4457.28            | 1.769                          | 990.94             | 1753.10            |
| A_68_P31259248 | chr17:57074657-57074701                           | NM_022328:133     | Milt1      | INSIDE                 | 0.492                                                        | 0.278                          | 2419.65            | 672.53             | 0.137                          | 1789.32            | 244.77             |
| A_68_P21038062 | chr2:17979342-17979387                            | NM_010804:2467    | Milt10     | INSIDE                 | 0.241                                                        | 0.375                          | 2426.96            | 910.56             | 0.09                           | 1917.93            | 173.29             |
| A_68_P21038125 | chr2:17987169-17987213                            | NM_010804:10293   | Milt10     | INSIDE                 | 0.477                                                        | 4.477                          | 1630.97            | 7301.34            | 2.133                          | 1256.39            | 2680.45            |
| A_68_P21038121 | chr2:17986435-17986479                            | NM_010804:9559    | Milt10     | INSIDE                 | 0.227                                                        | 0.642                          | 2206.60            | 1417.54            | 0.146                          | 1675.53            | 244.03             |
| A_68_P23088444 | chr4:87677993-87678037                            | NM_027326:1297    | Milt3      | INSIDE                 | 0.17                                                         | 2.479                          | 3514.11            | 8711.65            | 0.421                          | 2617.59            | 1100.97            |

| ProbeName      | Target position of probe on CpG island microarray | TargetID           | GeneSymbol | CpG island Description | Ratio of relative methylation (TiO <sub>2</sub> -NP/Vehicle) | Sham group                     |                    |                    | TiO <sub>2</sub> -H group      |                    |                    |
|----------------|---------------------------------------------------|--------------------|------------|------------------------|--------------------------------------------------------------|--------------------------------|--------------------|--------------------|--------------------------------|--------------------|--------------------|
|                |                                                   |                    |            |                        |                                                              | Relative methylation (Cy5/Cy3) | Cy3 signal (Input) | Cy5 signal (MeDIP) | Relative methylation (Cy5/Cy3) | Cy3 signal (Input) | Cy5 signal (MeDIP) |
| A_68_P28051873 | chr11:97521768-97521812                           | NM_139311:-2935    | Mlt6       | PROMOTER               | 0.516                                                        | 8.306                          | 616.49             | 5120.89            | 4.284                          | 604.56             | 2590.04            |
| A_68_P24114755 | chr5:135583039-135583083                          | NM_021455:278      | Mlxipl     | INSIDE                 | 0.582                                                        | 0.521                          | 1318.08            | 686.65             | 0.303                          | 1039.41            | 314.98             |
| A_68_P24152507 | chr5:143084713-143084757                          | NM_175217:-28      | Mmd2       | PROMOTER               | 0.192                                                        | 0.581                          | 2230.04            | 1296.42            | 0.112                          | 1563.20            | 174.47             |
| A_68_P22190750 | chr3:63100022-63100066                            | NM_008604:251      | Mme        | INSIDE                 | 0.276                                                        | 10.390                         | 1542.40            | 16026.10           | 2.867                          | 1298.10            | 3721.88            |
| A_68_P22190746 | chr3:63099501-63099545                            | NM_008604:-271     | Mme        | PROMOTER               | 0.288                                                        | 0.295                          | 4355.10            | 1283.87            | 0.085                          | 3612.81            | 306.22             |
| A_68_P22190748 | chr3:63099748-63099793                            | NM_008604:-23      | Mme        | PROMOTER               | 0.354                                                        | 0.594                          | 968.10             | 575.05             | 0.21                           | 817.49             | 171.73             |
| A_68_P27855086 | chr11:62462305-62462349                           | NM_175002:161      | Mmgt2      | INSIDE                 | 0.374                                                        | 0.444                          | 1499.83            | 665.42             | 0.166                          | 1010.60            | 167.69             |
| A_68_P26082829 | chr8:97876209-97876253                            | NM_008609:-6       | Mmp15      | PROMOTER               | 0.529                                                        | 4.510                          | 1400.02            | 6313.53            | 2.384                          | 1155.24            | 2754.50            |
| A_68_P24089922 | chr5:130089988-130090034                          | NM_011846:-78      | Mmp17      | PROMOTER               | 0.412                                                        | 30.984                         | 3412.34            | 105727.10          | 12.775                         | 3403.04            | 43474.18           |
| A_68_P21767513 | chr2:155601572-155601616                          | NM_010808:515      | Mmp24      | INSIDE                 | 0.119                                                        | 2.271                          | 8112.30            | 18424.15           | 0.271                          | 5367.53            | 1452.54            |
| A_68_P31092804 | chr17:23781905-23781949                           | NM_001033339:310   | Mmp25      | INSIDE                 | 0.189                                                        | 1.741                          | 1629.63            | 2836.38            | 0.329                          | 1227.60            | 404.03             |
| A_68_P27971658 | chr11:83276246-83276290                           | NM_080453:195      | Mmp28      | INSIDE                 | 0.642                                                        | 3.104                          | 703.24             | 2183.16            | 1.994                          | 618.52             | 1233.18            |
| A_68_P27971522 | chr11:83256374-83256418                           | NM_080453:20067    | Mmp28      | INSIDE                 | 0.573                                                        | 2.523                          | 1772.80            | 4472.32            | 1.445                          | 1577.41            | 2278.91            |
| A_68_P21820679 | chr2:164775318-164775362                          | NM_013599:1590     | Mmp9       | INSIDE                 | 0.372                                                        | 0.463                          | 1315.76            | 609.04             | 0.172                          | 1018.09            | 175.15             |
| A_68_P21820707 | chr2:164778880-164778924                          | NM_013599:5152     | Mmp9       | INSIDE                 | 0.535                                                        | 0.681                          | 902.60             | 615.08             | 0.365                          | 714.38             | 260.48             |
| A_68_P32118288 | chr19:42055682-42055726                           | NM_028152:-78      | Mms19      | DIVERGENT_PROMOTER     | 0.514                                                        | 3.902                          | 1346.81            | 5255.75            | 2.005                          | 1236.96            | 2480.30            |
| A_68_P22785943 | chr4:24423379-24423423                            | NM_199467:-208     | Mms221     | PROMOTER               | 0.532                                                        | 3.774                          | 1526.65            | 5761.71            | 2.008                          | 1328.16            | 2667.08            |
| A_68_P23985683 | chr5:111849467-111849511                          | NM_001081235:2303  | Mn1        | INSIDE                 | 0.259                                                        | 10.459                         | 688.33             | 7199.54            | 2.709                          | 572.82             | 1551.84            |
| A_68_P23985655 | chr5:111846403-111846447                          | NM_001081235:-761  | Mn1        | PROMOTER               | 0.61                                                         | 4.213                          | 945.06             | 3981.47            | 2.571                          | 836.77             | 2151.52            |
| A_68_P23985651 | chr5:111845888-111845932                          | NM_001081235:-1275 | Mn1        | PROMOTER               | 0.235                                                        | 1.634                          | 1325.93            | 2166.79            | 0.384                          | 1022.69            | 392.23             |
| A_68_P22289190 | chr3:83959655-83959699                            | NM_029797:32       | Mnd1       | INSIDE                 | 0.548                                                        | 0.725                          | 2990.75            | 2167.02            | 0.397                          | 2419.22            | 960.46             |
| A_68_P26627767 | chr9:72286337-72286381                            | NM_008613:23       | Mns1       | INSIDE                 | 0.368                                                        | 0.625                          | 1009.94            | 631.07             | 0.23                           | 764.76             | 175.81             |
| A_68_P27922696 | chr11:74645200-74645244                           | NM_010813:797      | Mnt        | INSIDE                 | 0.252                                                        | 10.725                         | 694.65             | 7449.89            | 2.697                          | 580.05             | 1564.55            |
| A_68_P27922751 | chr11:74651412-74651456                           | NM_010813:7009     | Mnt        | INSIDE                 | 0.342                                                        | 11.049                         | 2332.06            | 25767.92           | 3.774                          | 1987.40            | 7501.22            |
| A_68_P27922756 | chr11:74651953-74651997                           | NM_010813:7549     | Mnt        | INSIDE                 | 0.407                                                        | 5.905                          | 2776.38            | 16394.53           | 2.406                          | 2278.48            | 5481.98            |
| A_68_P27922692 | chr11:74644684-74644728                           | NM_010813:281      | Mnt        | INSIDE                 | 0.418                                                        | 6.940                          | 2179.64            | 15125.77           | 2.902                          | 1858.67            | 5394.01            |
| A_68_P27922700 | chr11:74645583-74645627                           | NM_010813:1179     | Mnt        | INSIDE                 | 0.432                                                        | 0.699                          | 1375.58            | 961.56             | 0.302                          | 988.67             | 298.35             |
| A_68_P23567791 | chr5:29805138-29805182                            | NM_019944:-150     | Mnx1       | PROMOTER               | 0.178                                                        | 17.738                         | 2291.31            | 40643.41           | 3.16                           | 1840.17            | 5814.48            |
| A_68_P23567792 | chr5:29805215-29805259                            | NM_019944:-226     | Mnx1       | PROMOTER               | 0.454                                                        | 0.261                          | 2479.91            | 648.22             | 0.119                          | 1911.14            | 226.83             |
| A_68_P23567786 | chr5:29804560-29804604                            | NM_019944:428      | Mnx1       | INSIDE                 | 0.48                                                         | 5.235                          | 1586.83            | 8307.66            | 2.513                          | 1363.35            | 3426.35            |
| A_68_P23873662 | chr5:89150059-89150103                            | NM_026735:185      | Mobk1a     | INSIDE                 | 0.342                                                        | 20.193                         | 3041.63            | 61421.08           | 6.915                          | 2517.00            | 17404.73           |
| A_68_P23873665 | chr5:89150336-89150380                            | NM_026735:463      | Mobk1a     | INSIDE                 | 0.427                                                        | 1.396                          | 2896.28            | 4043.45            | 0.596                          | 2209.38            | 1317.84            |
| A_68_P24592782 | chr6:83275935-83275979                            | NM_145571:-76      | Mobk1b     | DIVERGENT_PROMOTER     | 0.611                                                        | 3.478                          | 1014.27            | 3527.39            | 2.126                          | 852.49             | 1812.28            |
| A_68_P23226013 | chr4:115500963-115501007                          | NM_175308:288      | Mobk12c    | INSIDE                 | 0.579                                                        | 0.737                          | 2374.32            | 1748.69            | 0.426                          | 1856.47            | 791.20             |
| A_68_P23226010 | chr4:115500724-115500768                          | NM_175308:50       | Mobk12c    | INSIDE                 | 0.664                                                        | 0.551                          | 1112.32            | 613.23             | 0.366                          | 917.38             | 335.84             |
| A_68_P20240461 | chr1:55187949-55187993                            | NM_025283:-118     | Mobk13     | PROMOTER               | 0.4                                                          | 4.746                          | 1084.20            | 5145.66            | 1.899                          | 974.97             | 1851.88            |
| A_68_P20240462 | chr1:55188131-55188175                            | NM_025283:64       | Mobk13     | INSIDE                 | 0.275                                                        | 5.569                          | 1368.88            | 7623.68            | 1.534                          | 1064.37            | 1632.68            |
| A_68_P21840226 | chr2:168056561-168056605                          | NM_001160330:461   | Mocs3      | INSIDE                 | 0.424                                                        | 8.767                          | 459.21             | 4025.98            | 3.717                          | 445.51             | 1655.75            |
| A_68_P21840223 | chr2:168056306-168056350                          | NM_001160330:207   | Mocs3      | INSIDE                 | 0.529                                                        | 5.556                          | 502.57             | 2792.32            | 2.94                           | 408.14             | 1199.95            |
| A_68_P21840225 | chr2:168056474-168056518                          | NM_001160330:375   | Mocs3      | INSIDE                 | 0.541                                                        | 3.585                          | 739.16             | 2649.94            | 1.938                          | 618.43             | 1198.80            |
| A_68_P24591516 | chr6:83065809-83065853                            | NM_020619:331      | Mogs       | INSIDE                 | 0.417                                                        | 3.558                          | 1357.52            | 4829.48            | 1.484                          | 1350.00            | 2003.40            |
| A_68_P26811667 | chr9:107803499-107803544                          | NM_028369:13062    | Mon1a      | INSIDE                 | 0.147                                                        | 35.845                         | 1299.78            | 46590.01           | 5.271                          | 1185.93            | 6250.71            |
| A_68_P27512350 | chr10:122513515-122513559                         | NM_001163024:25    | Mon2       | INSIDE                 | 0.224                                                        | 21.028                         | 2602.11            | 54717.66           | 4.708                          | 2375.13            | 11181.54           |
| A_68_P27512349 | chr10:122513403-122513447                         | NM_001163024:137   | Mon2       | INSIDE                 | 0.475                                                        | 7.389                          | 2421.52            | 17893.38           | 3.51                           | 2036.13            | 7147.15            |
| A_68_P27553117 | chr11:3549252-3549296                             | NM_001159288:-222  | More2a     | DIVERGENT_PROMOTER     | 0.61                                                         | 0.263                          | 1689.83            | 445.08             | 0.161                          | 1329.54            | 213.46             |
| A_68_P26716012 | chr9:90009520-90009564                            | NM_001039147:116   | Morf41l    | INSIDE                 | 0.495                                                        | 0.700                          | 4601.79            | 3223.35            | 0.347                          | 3379.36            | 1171.99            |

| ProbeName      | Target position of probe on CpG island microarray | TargetID          | GeneSymbol | CpG island Description | Ratio of relative methylation (TiO <sub>2</sub> -NP/Vehicle) | Sham group                     |                    |                    | TiO <sub>2</sub> -H group      |                    |                    |
|----------------|---------------------------------------------------|-------------------|------------|------------------------|--------------------------------------------------------------|--------------------------------|--------------------|--------------------|--------------------------------|--------------------|--------------------|
|                |                                                   |                   |            |                        |                                                              | Relative methylation (Cy5/Cy3) | Cy3 signal (Input) | Cy5 signal (MeDIP) | Relative methylation (Cy5/Cy3) | Cy3 signal (Input) | Cy5 signal (MeDIP) |
| A_68_P31382195 | chr17:80689441-80689485                           | NM_194269:-89     | Morn2      | PROMOTER               | 0.268                                                        | 13.105                         | 1218.17            | 15963.82           | 3.512                          | 1152.31            | 4046.59            |
| A_68_P20897789 | chr1:186669350-186669394                          | NM_133684:354     | Mosc2      | INSIDE                 | 0.158                                                        | 15.632                         | 5620.81            | 87861.90           | 2.469                          | 4684.37            | 11564.24           |
| A_68_P24126542 | chr5:138041887-138041931                          | NM_030037:360     | Mospd3     | INSIDE                 | 0.318                                                        | 0.542                          | 3610.33            | 1957.90            | 0.173                          | 3050.06            | 526.71             |
| A_68_P24126543 | chr5:138042018-138042062                          | NM_030037:228     | Mospd3     | INSIDE                 | 0.538                                                        | 0.520                          | 1645.41            | 854.80             | 0.28                           | 1269.11            | 355.01             |
| A_68_P24126541 | chr5:138041805-138041849                          | NM_030037:442     | Mospd3     | INSIDE                 | 0.612                                                        | 0.083                          | 7389.10            | 616.22             | 0.051                          | 5168.69            | 263.95             |
| A_68_P31677060 | chr18:46625364-46625408                           | NM_028086:84      | Mospd4     | INSIDE                 | 0.18                                                         | 2.770                          | 2856.79            | 7912.30            | 0.498                          | 2310.71            | 1149.82            |
| A_68_P22393343 | chr3:104620941-104620985                          | NM_001163441:261  | Mov10      | INSIDE                 | 0.319                                                        | 0.506                          | 1270.69            | 643.24             | 0.162                          | 1047.75            | 169.32             |
| A_68_P23051091 | chr4:81088361-81088405                            | NM_010820:327     | Mpdz       | INSIDE                 | 0.205                                                        | 11.655                         | 10529.43           | 122723.40          | 2.385                          | 9551.56            | 22781.92           |
| A_68_P25176744 | chr7:71536910-71536954                            | NM_026483:190     | Mphosph10  | INSIDE                 | 0.618                                                        | 2.574                          | 2038.22            | 5246.48            | 1.591                          | 1557.27            | 2477.57            |
| A_68_P28077433 | chr11:101948728-101948772                         | NM_016695:1079    | Mpp2       | INSIDE                 | 0.314                                                        | 0.297                          | 4112.29            | 1221.84            | 0.093                          | 2491.50            | 232.15             |
| A_68_P28565714 | chr12:79850102-79850146                           | NM_019579:191     | Mpp5       | INSIDE                 | 0.283                                                        | 5.338                          | 1378.34            | 7357.55            | 1.511                          | 1225.74            | 1851.99            |
| A_68_P31790832 | chr18:67404825-67404869                           | NM_172630:638     | Mppe1      | INSIDE                 | 0.237                                                        | 6.475                          | 2007.76            | 13001.15           | 1.533                          | 1650.16            | 2529.52            |
| A_68_P30359772 | chr15:78241077-78241121                           | NM_138670:3565    | Mpst       | INSIDE                 | 0.62                                                         | 0.635                          | 1534.70            | 975.17             | 0.394                          | 1070.64            | 421.61             |
| A_68_P26764036 | chr9:99336932-99336976                            | NM_008624:177     | Mras       | INSIDE                 | 0.406                                                        | 7.841                          | 3431.79            | 26908.26           | 3.187                          | 2799.93            | 8924.09            |
| A_68_P26319360 | chr9:14589324-14589368                            | NM_018736:196     | Mre11a     | INSIDE                 | 0.246                                                        | 13.984                         | 5131.82            | 71762.65           | 3.434                          | 4331.26            | 14874.07           |
| A_68_P25394539 | chr7:112959728-112959772                          | NM_025301:-149    | Mrpl17     | PROMOTER               | 0.585                                                        | 0.175                          | 10857.93           | 1902.30            | 0.103                          | 7131.32            | 731.36             |
| A_68_P23579049 | chr5:31916560-31916604                            | NM_025796:259     | Mrpl33     | INSIDE                 | 0.601                                                        | 0.591                          | 854.82             | 504.93             | 0.355                          | 752.00             | 266.75             |
| A_68_P23188353 | chr4:106739305-106739349                          | NM_025500:145     | Mrpl37     | INSIDE                 | 0.592                                                        | 0.723                          | 1482.67            | 1072.16            | 0.428                          | 1289.58            | 551.93             |
| A_68_P28157575 | chr11:115999733-115999777                         | NM_024177:428     | Mrpl38     | INSIDE                 | 0.277                                                        | 1.360                          | 2372.16            | 3226.34            | 0.377                          | 1807.04            | 680.56             |
| A_68_P26344986 | chr9:20807641-20807685                            | NM_023167:482     | Mrpl4      | INSIDE                 | 0.457                                                        | 0.419                          | 2562.53            | 1072.48            | 0.191                          | 1838.80            | 351.39             |
| A_68_P25368691 | chr7:107757091-107757135                          | NR_003559:-602    | Mrpl48     | PROMOTER               | 0.33                                                         | 0.484                          | 1601.95            | 775.17             | 0.16                           | 1226.33            | 196.07             |
| A_68_P24591425 | chr6:83051529-83051573                            | NM_026744:-7551   | Mrpl53     | PROMOTER               | 0.389                                                        | 0.448                          | 1527.82            | 684.99             | 0.174                          | 1100.92            | 192.09             |
| A_68_P20765302 | chr1:162125324-162125368                          | NM_025474:-44     | Mrps14     | PROMOTER               | 0.629                                                        | 21.409                         | 4047.51            | 86652.27           | 13.461                         | 4112.07            | 55352.12           |
| A_68_P23931503 | chr5:101227718-101227762                          | NM_026826:-37     | Mrps18c    | DIVERGENT_PROMOTER     | 0.395                                                        | 0.328                          | 2436.45            | 798.72             | 0.13                           | 1640.28            | 212.58             |
| A_68_P26759567 | chr9:98501957-98502001                            | NM_025485:120     | Mrps22     | INSIDE                 | 0.348                                                        | 6.257                          | 1469.70            | 9195.37            | 2.176                          | 1239.45            | 2697.07            |
| A_68_P27998475 | chr11:88018009-88018053                           | NM_024174:111     | Mrps23     | INSIDE                 | 0.48                                                         | 0.282                          | 2405.16            | 677.29             | 0.135                          | 1698.42            | 229.61             |
| A_68_P21630447 | chr2:130390003-130390047                          | NM_207207:532     | Mrps26     | INSIDE                 | 0.072                                                        | 32.650                         | 1939.58            | 63328.33           | 2.359                          | 1571.25            | 3707.26            |
| A_68_P21934677 | chr3:8923780-8923824                              | NM_025434:55      | Mrps28     | INSIDE                 | 0.588                                                        | 3.719                          | 1338.59            | 4977.89            | 2.187                          | 1187.09            | 2596.25            |
| A_68_P29368026 | chr13:119175523-119175567                         | NM_021556:515     | Mrps30     | INSIDE                 | 0.273                                                        | 9.208                          | 1088.47            | 10023.10           | 2.514                          | 856.55             | 2153.60            |
| A_68_P24385095 | chr6:39760829-39760873                            | NM_001010930:85   | Mrps33     | INSIDE                 | 0.47                                                         | 0.712                          | 3420.69            | 2434.71            | 0.334                          | 2710.92            | 906.07             |
| A_68_P28154361 | chr11:115465384-115465428                         | NM_025305:-58     | Mrps7      | DIVERGENT_PROMOTER     | 0.424                                                        | 0.668                          | 815.19             | 544.45             | 0.283                          | 639.34             | 180.93             |
| A_68_P20185544 | chr1:42908420-42908464                            | NM_023514:365     | Mrps9      | INSIDE                 | 0.393                                                        | 0.526                          | 1053.88            | 554.65             | 0.207                          | 828.80             | 171.58             |
| A_68_P20185543 | chr1:42908342-42908386                            | NM_023514:287     | Mrps9      | INSIDE                 | 0.572                                                        | 0.289                          | 1784.00            | 516.04             | 0.166                          | 1331.06            | 220.35             |
| A_68_P31157234 | chr17:35183191-35183235                           | NM_013600:339     | Msh5       | INSIDE                 | 0.37                                                         | 4.956                          | 1062.51            | 5265.27            | 1.833                          | 949.28             | 1740.47            |
| A_68_P24009622 | chr5:115896965-115897009                          | NM_008629:17293   | Msi1       | INSIDE                 | 0.507                                                        | 8.516                          | 639.15             | 5442.84            | 4.319                          | 467.97             | 2021.01            |
| A_68_P24009562 | chr5:115886952-115886996                          | NM_008629:7281    | Msi1       | INSIDE                 | 0.598                                                        | 3.455                          | 455.65             | 1574.34            | 2.065                          | 391.78             | 808.96             |
| A_68_P28058586 | chr11:98656221-98656265                           | NM_028722:-840    | Msl1       | PROMOTER               | 0.382                                                        | 0.286                          | 5337.08            | 1527.85            | 0.109                          | 3414.89            | 373.88             |
| A_68_P26772685 | chr9:100978043-100978087                          | NM_001100451:-386 | Msl2       | PROMOTER               | 0.535                                                        | 0.200                          | 2351.25            | 469.41             | 0.107                          | 1649.39            | 176.18             |
| A_68_P32817209 | chrX:165111905-165111949                          | NM_010832:-92     | Msl3       | PROMOTER               | 0.306                                                        | 7.186                          | 757.40             | 5442.37            | 2.199                          | 931.82             | 2049.40            |
| A_68_P27154484 | chr10:55835338-55835382                           | NM_001163833:8638 | Msl3l2     | INSIDE                 | 0.146                                                        | 4.084                          | 6078.34            | 24822.20           | 0.595                          | 4652.99            | 2768.39            |
| A_68_P21044522 | chr2:19293408-19293452                            | NM_029619:168     | Msrb2      | INSIDE                 | 0.441                                                        | 0.198                          | 2889.29            | 572.07             | 0.087                          | 1998.02            | 174.48             |
| A_68_P27500269 | chr10:120335461-120335505                         | NM_177092:545     | Msrb3      | INSIDE                 | 0.434                                                        | 3.899                          | 2111.37            | 8232.64            | 1.693                          | 1719.39            | 2910.31            |
| A_68_P29044041 | chr13:53558129-53558173                           | NM_013601:9999    | Msx2       | DOWNSTREAM             | 0.59                                                         | 8.528                          | 1118.99            | 9542.65            | 5.028                          | 771.19             | 3877.56            |
| A_68_P25092690 | chr7:52622810-52622854                            | NR_027802:230     | Mtag2      | INSIDE                 | 0.309                                                        | 8.735                          | 2435.59            | 21275.01           | 2.699                          | 2060.03            | 5559.04            |
| A_68_P21579980 | chr2:121115168-121115212                          | NM_032393:-147    | Mtap1a     | PROMOTER               | 0.571                                                        | 0.671                          | 1569.84            | 1053.97            | 0.384                          | 1188.73            | 456.07             |
| A_68_P29263993 | chr13:100286596-100286640                         | NM_008634:-61     | Mtap1b     | PROMOTER               | 0.649                                                        | 2.943                          | 1197.47            | 3524.38            | 1.91                           | 969.09             | 1850.65            |

| ProbeName      | Target position of probe on CpG island microarray | TargetID           | GeneSymbol | CpG island Description | Ratio of relative methylation (TiO <sub>2</sub> -NP/Vehicle) | Sham group                     |                    |                    | TiO <sub>2</sub> -H group      |                    |                    |
|----------------|---------------------------------------------------|--------------------|------------|------------------------|--------------------------------------------------------------|--------------------------------|--------------------|--------------------|--------------------------------|--------------------|--------------------|
|                |                                                   |                    |            |                        |                                                              | Relative methylation (Cy5/Cy3) | Cy3 signal (Input) | Cy5 signal (MeDIP) | Relative methylation (Cy5/Cy3) | Cy3 signal (Input) | Cy5 signal (MeDIP) |
| A_68_P29263992 | chr13:100286417-100286461                         | NM_008634:119      | Mtap1b     | INSIDE                 | 0.482                                                        | 3.556                          | 1346.76            | 4789.54            | 1.714                          | 1241.29            | 2127.29            |
| A_68_P25954856 | chr8:73430275-73430319                            | NM_173013:424      | Mtap1s     | INSIDE                 | 0.019                                                        | 1.903                          | 7734.20            | 14719.17           | 0.036                          | 4897.58            | 176.30             |
| A_68_P25954897 | chr8:73438085-73438129                            | NM_173013:8234     | Mtap1s     | INSIDE                 | 0.57                                                         | 8.199                          | 4707.81            | 38600.73           | 4.672                          | 3053.63            | 14265.22           |
| A_68_P26821066 | chr9:109834856-109834900                          | NM_001205331:601   | Mtap4      | INSIDE                 | 0.266                                                        | 0.149                          | 6203.87            | 922.14             | 0.04                           | 4381.75            | 173.28             |
| A_68_P26821065 | chr9:109834739-109834783                          | NM_001205331:483   | Mtap4      | INSIDE                 | 0.449                                                        | 0.547                          | 2693.17            | 1473.96            | 0.246                          | 2155.28            | 530.18             |
| A_68_P26821058 | chr9:109833931-109833975                          | NM_001205331:-325  | Mtap4      | PROMOTER               | 0.611                                                        | 2.959                          | 1437.11            | 4251.69            | 1.807                          | 1262.52            | 2281.62            |
| A_68_P25360757 | chr7:106417697-106417741                          | NM_001043355:863   | Mtap6      | INSIDE                 | 0.521                                                        | 8.783                          | 2466.05            | 21659.86           | 4.579                          | 2227.02            | 10197.98           |
| A_68_P25360742 | chr7:106416261-106416305                          | NM_001043355:-573  | Mtap6      | PROMOTER               | 0.301                                                        | 0.707                          | 1197.08            | 846.93             | 0.213                          | 949.60             | 202.53             |
| A_68_P25360741 | chr7:106416185-106416229                          | NM_001043355:-649  | Mtap6      | PROMOTER               | 0.565                                                        | 0.611                          | 848.42             | 518.03             | 0.345                          | 699.10             | 241.33             |
| A_68_P26985109 | chr10:19868572-19868616                           | NM_001198635:-131  | Mtap7      | PROMOTER               | 0.351                                                        | 13.871                         | 1039.74            | 14422.10           | 4.871                          | 913.19             | 4447.81            |
| A_68_P23278957 | chr4:125914290-125914334                          | NM_001145970:19251 | Mtap7d1    | INSIDE                 | 0.344                                                        | 5.891                          | 1505.06            | 8866.39            | 2.026                          | 1519.59            | 3078.45            |
| A_68_P23278955 | chr4:125914068-125914112                          | NM_001145970:19473 | Mtap7d1    | INSIDE                 | 0.41                                                         | 4.490                          | 1638.00            | 7354.78            | 1.842                          | 1646.56            | 3032.50            |
| A_68_P23279068 | chr4:125932630-125932674                          | NM_001145970:911   | Mtap7d1    | INSIDE                 | 0.42                                                         | 0.372                          | 6210.38            | 2307.54            | 0.156                          | 4088.77            | 638.75             |
| A_68_P32774619 | chrX:155852596-155852640                          | NM_001081124:109   | Mtap7d2    | INSIDE                 | 0.521                                                        | 4.757                          | 937.89             | 4461.50            | 2.478                          | 1107.55            | 2744.71            |
| A_68_P22278905 | chr3:82162143-82162187                            | NM_001081230:171   | Mtap9      | INSIDE                 | 0.444                                                        | 0.402                          | 1391.87            | 559.51             | 0.179                          | 1036.93            | 185.22             |
| A_68_P22278904 | chr3:82162070-82162114                            | NM_001081230:99    | Mtap9      | INSIDE                 | 0.512                                                        | 38.631                         | 804.21             | 31067.63           | 19.785                         | 1118.44            | 22128.60           |
| A_68_P30232957 | chr15:55389253-55389297                           | NM_001168250:312   | Mtbp       | INSIDE                 | 0.665                                                        | 0.548                          | 2715.69            | 1487.23            | 0.364                          | 1897.42            | 690.55             |
| A_68_P31127484 | chr17:29484749-29484793                           | NM_019880:79       | Mtch1      | INSIDE                 | 0.515                                                        | 6.177                          | 1359.77            | 8399.43            | 3.184                          | 1143.48            | 3640.84            |
| A_68_P29106491 | chr13:67034356-67034400                           | NM_025547:-370     | Mterfd1    | PROMOTER               | 0.56                                                         | 4.029                          | 534.17             | 2152.17            | 2.256                          | 534.77             | 1206.35            |
| A_68_P20454693 | chr1:95202297-95202341                            | NM_178051:129      | Mterfd2    | INSIDE                 | 0.658                                                        | 0.447                          | 3350.82            | 1496.37            | 0.294                          | 2379.30            | 699.51             |
| A_68_P21973912 | chr3:19088304-19088348                            | NM_026182:83       | Mtfr1      | INSIDE                 | 0.187                                                        | 2.610                          | 3631.34            | 9476.04            | 0.489                          | 2644.68            | 1293.72            |
| A_68_P27674920 | chr11:29426294-29426338                           | NM_133767:-140     | Mtuf2      | PROMOTER               | 0.553                                                        | 0.482                          | 1472.68            | 709.92             | 0.266                          | 1174.59            | 312.91             |
| A_68_P24171031 | chr5:147775224-147775268                          | NM_029581:104      | Mtuf3      | INSIDE                 | 0.443                                                        | 0.506                          | 3644.80            | 1846.03            | 0.224                          | 2536.71            | 568.80             |
| A_68_P32453217 | chrX:68617827-68617871                            | NM_016985:-86      | Mtmr1      | PROMOTER               | 0.242                                                        | 13.437                         | 1953.32            | 26247.50           | 3.247                          | 2256.72            | 7326.90            |
| A_68_P25176079 | chr7:71432668-71432712                            | NM_172742:135      | Mtmr10     | INSIDE                 | 0.485                                                        | 4.020                          | 1592.95            | 6403.62            | 1.948                          | 1247.80            | 2430.94            |
| A_68_P30020394 | chr15:12134922-12134966                           | NM_172958:96       | Mtmr12     | INSIDE                 | 0.465                                                        | 4.082                          | 942.82             | 3848.56            | 1.899                          | 867.82             | 1648.38            |
| A_68_P24758234 | chr6:113187868-113187912                          | NM_026849:54       | Mtmr14     | INSIDE                 | 0.39                                                         | 0.215                          | 3153.46            | 677.65             | 0.084                          | 2065.13            | 173.07             |
| A_68_P31462885 | chr18:4375737-4375781                             | NM_026157:169      | Mtpap      | INSIDE                 | 0.605                                                        | 0.453                          | 1370.29            | 621.18             | 0.274                          | 1001.43            | 274.53             |
| A_68_P24362057 | chr6:35489865-35489909                            | NM_008098:2        | Mtpn       | INSIDE                 | 0.23                                                         | 11.848                         | 2004.06            | 23743.21           | 2.726                          | 2014.68            | 5491.32            |
| A_68_P26905236 | chr10:4522611-4522655                             | NM_175374:35       | Mtrf11     | INSIDE                 | 0.464                                                        | 7.259                          | 1636.62            | 11880.41           | 3.37                           | 1379.61            | 4649.49            |
| A_68_P29110675 | chr13:68720936-68720980                           | NM_172480:40       | Mtrr       | INSIDE                 | 0.451                                                        | 0.350                          | 2022.52            | 707.42             | 0.158                          | 1425.71            | 224.75             |
| A_68_P30252145 | chr15:58913581-58913625                           | NM_001146180:-21   | Mtss1      | PROMOTER               | 0.25                                                         | 13.211                         | 3144.28            | 41539.66           | 3.298                          | 2840.09            | 9367.04            |
| A_68_P30252139 | chr15:58912975-58913019                           | NM_001146180:585   | Mtss1      | INSIDE                 | 0.552                                                        | 8.307                          | 2403.37            | 19964.47           | 4.586                          | 2081.23            | 9544.50            |
| A_68_P30252138 | chr15:58912850-58912894                           | NM_001146180:709   | Mtss1      | INSIDE                 | 0.514                                                        | 2.983                          | 1156.44            | 3449.76            | 1.535                          | 949.89             | 1457.62            |
| A_68_P26164572 | chr8:113262808-113262852                          | NM_198625:17447    | Mtss11     | INSIDE                 | 0.017                                                        | 193.881                        | 1840.55            | 356846.70          | 3.239                          | 2084.88            | 6753.17            |
| A_68_P26164573 | chr8:113262875-113262919                          | NM_198625:17513    | Mtss11     | INSIDE                 | 0.021                                                        | 105.656                        | 3149.55            | 332767.40          | 2.261                          | 2838.32            | 6418.79            |
| A_68_P26164568 | chr8:113262460-113262504                          | NM_198625:17099    | Mtss11     | INSIDE                 | 0.411                                                        | 26.427                         | 5706.20            | 150795.70          | 10.854                         | 4326.60            | 46958.93           |
| A_68_P26164571 | chr8:113262720-113262764                          | NM_198625:17359    | Mtss11     | INSIDE                 | 0.532                                                        | 3.377                          | 904.35             | 3054.45            | 1.798                          | 678.95             | 1220.54            |
| A_68_P25809389 | chr8:42218752-42218796                            | NM_001005863:306   | Mtus1      | INSIDE                 | 0.25                                                         | 2.070                          | 2426.59            | 5023.81            | 0.517                          | 1885.11            | 974.86             |
| A_68_P25809394 | chr8:42219374-42219418                            | NM_001005863:-316  | Mtus1      | PROMOTER               | 0.65                                                         | 0.680                          | 1593.53            | 1083.59            | 0.442                          | 1258.88            | 556.11             |
| A_68_P24176699 | chr5:148769334-148769378                          | NM_029920:461      | Mtus2      | INSIDE                 | 0.307                                                        | 20.897                         | 4254.09            | 88899.27           | 6.406                          | 3833.29            | 24556.72           |
| A_68_P24176695 | chr5:148768968-148769012                          | NM_029920:95       | Mtus2      | INSIDE                 | 0.665                                                        | 0.566                          | 1745.54            | 988.58             | 0.376                          | 1468.09            | 552.62             |
| A_68_P24176700 | chr5:148769468-148769512                          | NM_029920:595      | Mtus2      | INSIDE                 | 0.5                                                          | 0.646                          | 1699.14            | 1097.18            | 0.323                          | 1281.07            | 413.73             |
| A_68_P24176698 | chr5:148769249-148769293                          | NM_029920:375      | Mtus2      | INSIDE                 | 0.559                                                        | 0.467                          | 1047.25            | 489.00             | 0.261                          | 815.38             | 212.72             |
| A_68_P29226007 | chr13:93614754-93614798                           | NM_001162945:35    | Mtx3       | INSIDE                 | 0.146                                                        | 22.334                         | 1251.02            | 27940.75           | 3.262                          | 1134.97            | 3702.12            |
| A_68_P23345719 | chr4:137990637-137990681                          | NM_026689:72       | Mull1      | INSIDE                 | 0.537                                                        | 3.336                          | 3149.25            | 10506.10           | 1.79                           | 2473.46            | 4428.47            |

| ProbeName      | Target position of probe on CpG island microarray | TargetID           | GeneSymbol | CpG island Description | Ratio of relative methylation (TiO <sub>2</sub> -NP/Vehicle) | Sham group                     |                    |                    | TiO <sub>2</sub> -H group      |                    |                    |
|----------------|---------------------------------------------------|--------------------|------------|------------------------|--------------------------------------------------------------|--------------------------------|--------------------|--------------------|--------------------------------|--------------------|--------------------|
|                |                                                   |                    |            |                        |                                                              | Relative methylation (Cy5/Cy3) | Cy3 signal (Input) | Cy5 signal (MeDIP) | Relative methylation (Cy5/Cy3) | Cy3 signal (Input) | Cy5 signal (MeDIP) |
| A_68_P27281785 | chr10:79689246-79689290                           | NM_023431:-74      | Mum1       | PROMOTER               | 0.509                                                        | 6.414                          | 6822.97            | 43760.36           | 3.266                          | 5081.53            | 16598.51           |
| A_68_P28961841 | chr13:38726802-38726846                           | NM_139063:154      | Muted      | INSIDE                 | 0.442                                                        | 0.642                          | 2275.12            | 1461.65            | 0.284                          | 1757.32            | 498.83             |
| A_68_P23231034 | chr4:116480288-116480332                          | NM_001159581:-28   | Mutyh      | DIVERGENT_PROMOTER     | 0.472                                                        | 3.420                          | 3295.33            | 11270.52           | 1.613                          | 2643.21            | 4262.61            |
| A_68_P24611353 | chr6:86619098-86619142                            | NM_010751:33       | Mxd1       | INSIDE                 | 0.353                                                        | 13.366                         | 10836.90           | 144842.90          | 4.72                           | 9986.21            | 47139.07           |
| A_68_P29054388 | chr13:55431309-55431353                           | NM_016662:-239     | Mxd3       | PROMOTER               | 0.585                                                        | 6.457                          | 1210.70            | 7817.59            | 3.778                          | 1170.70            | 4422.70            |
| A_68_P23592883 | chr5:34529870-34529914                            | NM_010753:467      | Mxd4       | INSIDE                 | 0.117                                                        | 2.098                          | 1356.88            | 2846.45            | 0.245                          | 1181.48            | 289.47             |
| A_68_P32181743 | chr19:53388066-53388111                           | NM_001008542:3093  | Mxi1       | INSIDE                 | 0.271                                                        | 0.397                          | 1925.78            | 763.86             | 0.107                          | 1585.55            | 170.17             |
| A_68_P32181854 | chr19:53403918-53403962                           | NM_001008543:-995  | Mxi1       | PROMOTER               | 0.294                                                        | 5.539                          | 1075.23            | 5955.43            | 1.626                          | 975.99             | 1586.84            |
| A_68_P26991379 | chr10:20879243-20879287                           | NM_001198914:1526  | Myb        | INSIDE                 | 0.575                                                        | 7.373                          | 1565.43            | 11542.36           | 4.237                          | 1389.64            | 5887.99            |
| A_68_P30267513 | chr15:61816737-61816781                           | NM_001177352:-137  | Myc        | PROMOTER               | 0.147                                                        | 14.380                         | 3677.40            | 52880.90           | 2.116                          | 3248.65            | 6874.03            |
| A_68_P30267538 | chr15:61819548-61819592                           | NM_001177352:2675  | Myc        | INSIDE                 | 0.389                                                        | 3.907                          | 3138.99            | 12264.02           | 1.521                          | 2562.81            | 3898.58            |
| A_68_P30267527 | chr15:61818322-61818366                           | NM_001177352:1449  | Myc        | INSIDE                 | 0.382                                                        | 1.390                          | 1245.38            | 1731.34            | 0.531                          | 1068.24            | 567.42             |
| A_68_P29865209 | chr14:103745828-103745872                         | NM_207215:167      | Mycbp2     | INSIDE                 | 0.572                                                        | 0.717                          | 2081.61            | 1493.20            | 0.41                           | 1532.16            | 628.17             |
| A_68_P29865204 | chr14:103745283-103745327                         | NM_207215:713      | Mycbp2     | INSIDE                 | 0.476                                                        | 1.410                          | 1757.03            | 2477.14            | 0.671                          | 1480.02            | 992.67             |
| A_68_P23260191 | chr4:122672828-122672872                          | NM_008506:-491     | Mycl1      | PROMOTER               | 0.555                                                        | 21.944                         | 3224.91            | 70768.91           | 12.183                         | 3065.06            | 37340.68           |
| A_68_P23260196 | chr4:122673426-122673470                          | NM_008506:107      | Mycl1      | INSIDE                 | 0.125                                                        | 12.941                         | 3046.31            | 39423.20           | 1.615                          | 3553.71            | 5740.89            |
| A_68_P23260198 | chr4:122673656-122673700                          | NM_008506:337      | Mycl1      | INSIDE                 | 0.158                                                        | 9.716                          | 1076.52            | 10459.42           | 1.535                          | 914.51             | 1403.55            |
| A_68_P28246307 | chr12:12948424-12948468                           | NM_008709:196      | Mycn       | INSIDE                 | 0.37                                                         | 0.516                          | 1057.00            | 544.99             | 0.191                          | 916.74             | 174.89             |
| A_68_P28246269 | chr12:12944121-12944165                           | NM_008709:4500     | Mycn       | INSIDE                 | 0.474                                                        | 6.381                          | 779.67             | 4975.32            | 3.022                          | 669.38             | 2022.59            |
| A_68_P28246291 | chr12:12946601-12946645                           | NM_008709:2020     | Mycn       | INSIDE                 | 0.624                                                        | 0.624                          | 2212.10            | 1380.89            | 0.389                          | 1506.87            | 586.72             |
| A_68_P28246293 | chr12:12946958-12947002                           | NM_008709:1662     | Mycn       | INSIDE                 | 0.452                                                        | 0.636                          | 982.02             | 624.86             | 0.288                          | 836.84             | 240.93             |
| A_68_P28246270 | chr12:12944193-12944237                           | NM_008709:4428     | Mycn       | INSIDE                 | 0.558                                                        | 2.705                          | 1461.52            | 3952.69            | 1.51                           | 1162.05            | 1754.25            |
| A_68_P32231475 | chrX:5045956-5046000                              | NM_010850:405      | Myes       | INSIDE                 | 0.579                                                        | 3.136                          | 452.37             | 1418.66            | 1.814                          | 515.62             | 935.50             |
| A_68_P20450137 | chr1:94538493-94538537                            | NR_028108:11       | Myeov2     | INSIDE                 | 0.589                                                        | 0.180                          | 3499.92            | 631.69             | 0.106                          | 2770.20            | 294.64             |
| A_68_P30497295 | chr15:102162385-102162429                         | NM_021713:267      | Myg1       | INSIDE                 | 0.536                                                        | 0.453                          | 3249.04            | 1471.44            | 0.243                          | 2375.77            | 577.07             |
| A_68_P27890688 | chr11:68505670-68505714                           | NM_175260:276      | Myh10      | INSIDE                 | 0.329                                                        | 0.517                          | 4356.62            | 2254.50            | 0.17                           | 3124.73            | 532.02             |
| A_68_P27890689 | chr11:68505755-68505799                           | NM_175260:360      | Myh10      | INSIDE                 | 0.421                                                        | 1.525                          | 3915.85            | 5972.21            | 0.642                          | 2834.94            | 1821.08            |
| A_68_P25088768 | chr7:51924794-51924838                            | NM_028021:-3943    | Myh14      | PROMOTER               | 0.211                                                        | 15.416                         | 1825.84            | 28146.26           | 3.258                          | 1429.82            | 4658.40            |
| A_68_P25088776 | chr7:51926206-51926250                            | NM_028021:-5355    | Myh14      | PROMOTER               | 0.663                                                        | 12.010                         | 1394.28            | 16744.59           | 7.957                          | 1172.68            | 9331.54            |
| A_68_P21766702 | chr2:155455115-155455159                          | NM_001085378:18189 | Myh7b      | INSIDE                 | 0.464                                                        | 6.282                          | 3010.77            | 18914.98           | 2.918                          | 2848.95            | 8313.32            |
| A_68_P30356228 | chr15:77672759-77672803                           | NM_022410:-235     | Myh9       | PROMOTER               | 0.241                                                        | 19.914                         | 7216.80            | 143716.80          | 4.804                          | 6059.97            | 29113.77           |
| A_68_P30356227 | chr15:77672647-77672691                           | NM_022410:-123     | Myh9       | PROMOTER               | 0.271                                                        | 11.950                         | 5006.12            | 59822.93           | 3.238                          | 4383.52            | 14193.62           |
| A_68_P29001573 | chr13:45484920-45484964                           | NM_153789:-168     | Myli1      | PROMOTER               | 0.519                                                        | 3.960                          | 1841.04            | 7289.92            | 2.056                          | 1532.36            | 3150.05            |
| A_68_P22029229 | chr3:30501750-30501794                            | NM_030557:764      | Mynn       | INSIDE                 | 0.64                                                         | 0.613                          | 1888.13            | 1156.60            | 0.392                          | 1555.51            | 609.73             |
| A_68_P30082169 | chr15:25552086-25552130                           | NM_019472:-196     | Myo10      | PROMOTER               | 0.569                                                        | 3.366                          | 14492.29           | 48780.82           | 1.916                          | 10889.22           | 20861.56           |
| A_68_P30082783 | chr15:25643838-25643882                           | NM_019472:91556    | Myo10      | INSIDE                 | 0.314                                                        | 1.836                          | 2350.96            | 4317.50            | 0.577                          | 1648.10            | 951.27             |
| A_68_P27927426 | chr11:75469605-75469649                           | NM_001080775:110   | Myo1c      | INSIDE                 | 0.255                                                        | 8.039                          | 797.52             | 6411.55            | 2.047                          | 645.36             | 1320.90            |
| A_68_P27927427 | chr11:75469683-75469727                           | NM_001080775:188   | Myo1c      | INSIDE                 | 0.292                                                        | 4.752                          | 4891.53            | 23245.95           | 1.39                           | 3727.55            | 5181.06            |
| A_68_P27568981 | chr11:6428736-6428780                             | NM_178440:-7797    | Myo1g      | PROMOTER               | 0.432                                                        | 0.413                          | 1277.90            | 527.96             | 0.178                          | 991.75             | 176.86             |
| A_68_P26641829 | chr9:74918724-74918768                            | NM_010864:-266     | Myo5a      | PROMOTER               | 0.563                                                        | 0.625                          | 1686.43            | 1053.79            | 0.352                          | 1376.76            | 484.42             |
| A_68_P26641831 | chr9:74919027-74919071                            | NM_010864:36       | Myo5a      | INSIDE                 | 0.508                                                        | 0.497                          | 878.96             | 437.07             | 0.253                          | 740.52             | 187.03             |
| A_68_P31831023 | chr18:74602569-74602613                           | NM_201600:318      | Myo5b      | INSIDE                 | 0.191                                                        | 14.686                         | 469.93             | 6901.27            | 2.8                            | 441.80             | 1236.91            |
| A_68_P26555224 | chr9:59598868-59598912                            | NM_173018:-90      | Myo9a      | DIVERGENT_PROMOTER     | 0.191                                                        | 0.256                          | 4671.39            | 1195.67            | 0.049                          | 3527.30            | 172.45             |
| A_68_P29448043 | chr14:21459839-21459883                           | NM_021508:15902    | Myoz1      | DOWNSTREAM             | 0.202                                                        | 1.820                          | 6470.88            | 11777.94           | 0.367                          | 4777.25            | 1753.79            |
| A_68_P24990788 | chr7:19577261-19577305                            | NM_145579:689      | Mypop      | INSIDE                 | 0.469                                                        | 0.270                          | 1986.25            | 535.83             | 0.126                          | 1417.64            | 179.24             |
| A_68_P25713191 | chr8:23969515-23969559                            | NM_001081149:-474  | Myst3      | PROMOTER               | 0.516                                                        | 3.950                          | 553.11             | 2184.96            | 2.037                          | 591.03             | 1204.08            |



| ProbeName      | Target position of probe on CpG island microarray | TargetID          | GeneSymbol | CpG island Description | Ratio of relative methylation (TiO <sub>2</sub> -NP/Vehicle) | Sham group                     |                    |                    | TiO <sub>2</sub> -H group      |                    |                    |
|----------------|---------------------------------------------------|-------------------|------------|------------------------|--------------------------------------------------------------|--------------------------------|--------------------|--------------------|--------------------------------|--------------------|--------------------|
|                |                                                   |                   |            |                        |                                                              | Relative methylation (Cy5/Cy3) | Cy3 signal (Input) | Cy5 signal (MeDIP) | Relative methylation (Cy5/Cy3) | Cy3 signal (Input) | Cy5 signal (MeDIP) |
| A_68_P29453025 | chr14:22319120-22319164                           | NM_017479:136     | Myst4      | INSIDE                 | 0.322                                                        | 0.360                          | 2412.67            | 869.60             | 0.116                          | 1703.23            | 197.85             |
| A_68_P29453036 | chr14:22320298-22320342                           | NM_017479:1314    | Myst4      | INSIDE                 | 0.613                                                        | 5.171                          | 1494.11            | 7725.64            | 3.17                           | 1339.32            | 4246.18            |
| A_68_P29453027 | chr14:22319300-22319344                           | NM_017479:316     | Myst4      | INSIDE                 | 0.615                                                        | 0.468                          | 2190.32            | 1025.05            | 0.288                          | 1686.73            | 485.09             |
| A_68_P29453037 | chr14:22320470-22320514                           | NM_017479:1486    | Myst4      | INSIDE                 | 0.616                                                        | 16.195                         | 5806.59            | 94039.73           | 9.977                          | 5067.49            | 50556.74           |
| A_68_P29453022 | chr14:22318726-22318770                           | NM_001205241:-243 | Myst4      | PROMOTER               | 0.617                                                        | 0.612                          | 2935.38            | 1795.20            | 0.377                          | 2104.24            | 794.22             |
| A_68_P22868863 | chr4:42929796-42929840                            | NM_172690:-304    | N28178     | PROMOTER               | 0.593                                                        | 3.316                          | 570.40             | 1891.47            | 1.967                          | 528.59             | 1039.52            |
| A_68_P23757989 | chr5:66155461-66155505                            | NM_001024917:723  | N4bp2      | INSIDE                 | 0.368                                                        | 7.259                          | 1692.23            | 12284.20           | 2.671                          | 1437.58            | 3839.27            |
| A_68_P23912411 | chr5:97821152-97821196                            | NM_001033191:175  | Naa11      | INSIDE                 | 0.606                                                        | 3.772                          | 1414.03            | 5333.83            | 2.285                          | 1092.98            | 2497.99            |
| A_68_P22129522 | chr3:51220411-51220455                            | NM_053089:495     | Naa15      | INSIDE                 | 0.333                                                        | 7.913                          | 2752.13            | 21778.76           | 2.636                          | 2590.45            | 6828.50            |
| A_68_P29080348 | chr13:59686650-59686694                           | NM_030153:-21     | Naa35      | PROMOTER               | 0.259                                                        | 22.863                         | 1997.25            | 45663.33           | 5.927                          | 1619.67            | 9600.59            |
| A_68_P20227608 | chr1:52557632-52557676                            | NM_008667:-362    | Nab1       | PROMOTER               | 0.516                                                        | 3.175                          | 1515.43            | 4811.50            | 1.638                          | 1379.50            | 2260.18            |
| A_68_P27537384 | chr10:127104122-127104166                         | NM_001122895:-385 | Nab2       | DIVERGENT_PROMOTER     | 0.631                                                        | 0.603                          | 1096.99            | 661.29             | 0.38                           | 956.88             | 363.85             |
| A_68_P27539155 | chr10:127472881-127472925                         | NM_001113199:501  | Naca       | INSIDE                 | 0.61                                                         | 0.423                          | 1367.98            | 578.81             | 0.258                          | 1110.02            | 286.28             |
| A_68_P27539153 | chr10:127472665-127472709                         | NM_001113199:285  | Naca       | INSIDE                 | 0.621                                                        | 0.723                          | 4190.81            | 3028.70            | 0.449                          | 2684.43            | 1204.30            |
| A_68_P27569379 | chr11:6505657-6505701                             | NM_001081652:379  | Nacad      | INSIDE                 | 0.232                                                        | 35.660                         | 3979.22            | 141899.00          | 8.259                          | 3910.03            | 32291.72           |
| A_68_P23439342 | chr4:154938332-154938376                          | NM_001159637:431  | Nadk       | INSIDE                 | 0.639                                                        | 0.469                          | 1458.15            | 683.82             | 0.3                            | 1189.20            | 356.32             |
| A_68_P25934950 | chr8:69384793-69384837                            | NM_001163564:699  | Naf1       | INSIDE                 | 0.549                                                        | 2.752                          | 2119.25            | 5832.72            | 1.51                           | 1997.96            | 3017.46            |
| A_68_P30382866 | chr15:82169438-82169482                           | NM_008669:-204    | Naga       | DIVERGENT_PROMOTER     | 0.429                                                        | 3.981                          | 1002.77            | 3991.89            | 1.71                           | 853.42             | 1459.09            |
| A_68_P28071734 | chr11:100931359-100931403                         | NM_013792:-27     | Naglu      | PROMOTER               | 0.336                                                        | 5.038                          | 1188.94            | 5989.80            | 1.694                          | 1061.19            | 1797.71            |
| A_68_P30514378 | chr16:5203992-5204036                             | NM_013796:91      | Nagpa      | INSIDE                 | 0.545                                                        | 6.661                          | 3376.19            | 22488.63           | 3.629                          | 2947.54            | 10696.80           |
| A_68_P30514376 | chr16:5203769-5203813                             | NM_013796:315     | Nagpa      | INSIDE                 | 0.465                                                        | 3.257                          | 1369.30            | 4460.46            | 1.514                          | 1033.53            | 1564.34            |
| A_68_P28077768 | chr11:102007243-102007287                         | NM_178053:-415    | Nags       | PROMOTER               | 0.607                                                        | 0.233                          | 1914.30            | 445.58             | 0.141                          | 1210.67            | 171.19             |
| A_68_P32226993 | chr19:60831736-60831780                           | NM_178421:-131    | Nanos1     | PROMOTER               | 0.198                                                        | 25.627                         | 9787.45            | 250827.80          | 5.084                          | 8785.24            | 44665.91           |
| A_68_P32227001 | chr19:60832863-60832907                           | NM_178421:995     | Nanos1     | INSIDE                 | 0.394                                                        | 0.274                          | 2197.98            | 601.42             | 0.108                          | 1633.49            | 176.11             |
| A_68_P32226999 | chr19:60832637-60832681                           | NM_178421:769     | Nanos1     | INSIDE                 | 0.588                                                        | 0.579                          | 1817.98            | 1051.75            | 0.34                           | 1410.41            | 479.50             |
| A_68_P21742434 | chr2:150864733-150864777                          | NM_026086:361     | Nanp       | INSIDE                 | 0.247                                                        | 10.563                         | 852.90             | 9009.42            | 2.611                          | 683.71             | 1785.26            |
| A_68_P22889024 | chr4:46502472-46502516                            | NM_053179:294     | Nans       | INSIDE                 | 0.187                                                        | 0.379                          | 11568.22           | 4387.92            | 0.071                          | 8142.36            | 577.58             |
| A_68_P22889023 | chr4:46502385-46502429                            | NM_053179:206     | Nans       | INSIDE                 | 0.347                                                        | 0.299                          | 7126.86            | 2130.11            | 0.104                          | 4817.26            | 499.71             |
| A_68_P22889022 | chr4:46502288-46502332                            | NM_053179:110     | Nans       | INSIDE                 | 0.611                                                        | 0.408                          | 1653.33            | 674.08             | 0.249                          | 1239.56            | 308.85             |
| A_68_P25601671 | chr7:150734944-150734988                          | NM_008672:29      | Nap114     | INSIDE                 | 0.505                                                        | 0.619                          | 2951.63            | 1827.48            | 0.313                          | 2493.99            | 779.51             |
| A_68_P24979588 | chr7:16683856-16683900                            | NM_025898:-113    | Napa       | PROMOTER               | 0.552                                                        | 0.396                          | 1921.39            | 761.43             | 0.219                          | 1502.47            | 328.54             |
| A_68_P24979593 | chr7:16684397-16684441                            | NM_025898:427     | Napa       | INSIDE                 | 0.648                                                        | 0.484                          | 1728.52            | 836.25             | 0.313                          | 1423.04            | 446.05             |
| A_68_P23527254 | chr5:21181777-21181821                            | NM_178728:25365   | Napepld    | INSIDE                 | 0.311                                                        | 4.439                          | 3823.06            | 16969.91           | 1.38                           | 2411.76            | 3328.97            |
| A_68_P23527255 | chr5:21181848-21181895                            | NM_178728:25292   | Napepld    | INSIDE                 | 0.541                                                        | 3.669                          | 584.15             | 2143.50            | 1.984                          | 400.49             | 794.75             |
| A_68_P30344754 | chr15:75724482-75724526                           | NM_172607:407     | Naprt1     | INSIDE                 | 0.525                                                        | 0.324                          | 1977.77            | 640.17             | 0.17                           | 1579.36            | 268.41             |
| A_68_P30344755 | chr15:75724584-75724628                           | NM_172607:305     | Naprt1     | INSIDE                 | 0.541                                                        | 0.317                          | 5450.65            | 1729.04            | 0.172                          | 3968.47            | 680.70             |
| A_68_P30344756 | chr15:75724658-75724702                           | NM_172607:231     | Naprt1     | INSIDE                 | 0.654                                                        | 0.264                          | 4065.70            | 1074.06            | 0.173                          | 2855.64            | 493.66             |
| A_68_P30344676 | chr15:75714693-75714737                           | NM_172607:10197   | Naprt1     | DOWNSTREAM             | 0.347                                                        | 1.415                          | 1575.12            | 2228.67            | 0.491                          | 1370.77            | 672.60             |
| A_68_P30506992 | chr16:3884518-3884562                             | NM_029090:-78     | Nat15      | PROMOTER               | 0.607                                                        | 2.477                          | 1320.75            | 3271.31            | 1.503                          | 1052.27            | 1581.39            |
| A_68_P23592057 | chr5:34343782-34343826                            | NM_001001985:5172 | Nat8l      | INSIDE                 | 0.258                                                        | 27.305                         | 11547.77           | 315315.90          | 7.042                          | 13848.50           | 97519.56           |
| A_68_P23592019 | chr5:34339056-34339100                            | NM_001001985:446  | Nat8l      | INSIDE                 | 0.454                                                        | 0.532                          | 3556.52            | 1891.58            | 0.241                          | 2527.11            | 609.87             |
| A_68_P23592017 | chr5:34338746-34338790                            | NM_001001985:136  | Nat8l      | INSIDE                 | 0.562                                                        | 0.605                          | 1210.36            | 732.41             | 0.34                           | 843.35             | 287.05             |
| A_68_P23592026 | chr5:34340043-34340087                            | NM_001001985:1432 | Nat8l      | INSIDE                 | 0.655                                                        | 3.630                          | 413.70             | 1501.55            | 2.376                          | 390.95             | 928.97             |
| A_68_P20640026 | chr1:137429314-137429358                          | NM_173437:52596   | Nav1       | INSIDE                 | 0.483                                                        | 6.512                          | 2271.82            | 14793.51           | 3.145                          | 1994.12            | 6270.63            |
| A_68_P20640400 | chr1:137481754-137481798                          | NM_173437:156     | Nav1       | INSIDE                 | 0.644                                                        | 2.835                          | 1100.91            | 3121.40            | 1.825                          | 1033.12            | 1885.40            |
| A_68_P20640025 | chr1:137429239-137429283                          | NM_173437:52672   | Nav1       | INSIDE                 | 0.401                                                        | 3.588                          | 2759.00            | 9898.07            | 1.44                           | 1981.09            | 2852.38            |

| ProbeName      | Target position of probe on CpG island microarray | TargetID           | GeneSymbol | CpG island Description | Ratio of relative methylation (TiO <sub>2</sub> -NP/Vehicle) | Sham group                     |                    |                    | TiO <sub>2</sub> -H group      |                    |                    |
|----------------|---------------------------------------------------|--------------------|------------|------------------------|--------------------------------------------------------------|--------------------------------|--------------------|--------------------|--------------------------------|--------------------|--------------------|
|                |                                                   |                    |            |                        |                                                              | Relative methylation (Cy5/Cy3) | Cy3 signal (Input) | Cy5 signal (MeDIP) | Relative methylation (Cy5/Cy3) | Cy3 signal (Input) | Cy5 signal (MeDIP) |
| A_68_P25111224 | chr7:56501224-56501268                            | NM_175272:312      | Nav2       | PROMOTER               | 0.108                                                        | 3.907                          | 2064.35            | 8065.19            | 0.42                           | 1535.32            | 645.25             |
| A_68_P22157978 | chr3:55987140-55987184                            | NM_030595:461      | Nbea       | INSIDE                 | 0.561                                                        | 8.086                          | 1297.98            | 10495.14           | 4.534                          | 1054.17            | 4780.10            |
| A_68_P22157981 | chr3:55987567-55987611                            | NM_030595:35       | Nbea       | INSIDE                 | 0.655                                                        | 4.632                          | 1531.89            | 7095.84            | 3.034                          | 1285.81            | 3900.77            |
| A_68_P22157982 | chr3:55987695-55987739                            | NM_030595:93       | Nbea       | PROMOTER               | 0.364                                                        | 3.992                          | 2641.91            | 10546.02           | 1.455                          | 2028.54            | 2950.88            |
| A_68_P26824824 | chr9:110532605-110532649                          | NM_183276:24039    | Nbea2      | INSIDE                 | 0.382                                                        | 4.705                          | 3282.21            | 15444.19           | 1.796                          | 2716.56            | 4877.96            |
| A_68_P26825022 | chr9:110556586-110556630                          | NM_183276:57       | Nbea2      | INSIDE                 | 0.369                                                        | 1.452                          | 1661.02            | 2411.96            | 0.536                          | 1260.76            | 675.89             |
| A_68_P22752524 | chr4:15885248-15885292                            | NM_013752:157      | Nbn        | INSIDE                 | 0.274                                                        | 12.495                         | 1486.88            | 18578.71           | 3.429                          | 1308.66            | 4487.30            |
| A_68_P22752527 | chr4:15885475-15885519                            | NM_013752:383      | Nbn        | INSIDE                 | 0.547                                                        | 0.507                          | 1173.18            | 595.04             | 0.277                          | 980.94             | 272.14             |
| A_68_P26500013 | chr9:49606044-49606088                            | NM_001081445:1108  | Ncam1      | INSIDE                 | 0.301                                                        | 20.268                         | 5898.36            | 119548.20          | 6.097                          | 4574.99            | 27895.24           |
| A_68_P26500007 | chr9:49605368-49605412                            | NM_001081445:1784  | Ncam1      | INSIDE                 | 0.533                                                        | 3.901                          | 1140.33            | 4448.77            | 2.078                          | 1037.64            | 2155.76            |
| A_68_P26500009 | chr9:49605633-49605677                            | NM_001081445:1520  | Ncam1      | INSIDE                 | 0.548                                                        | 0.402                          | 1145.20            | 460.38             | 0.22                           | 785.22             | 172.84             |
| A_68_P25949903 | chr8:72635987-72636031                            | NM_007789:8735     | Ncan       | INSIDE                 | 0.471                                                        | 5.904                          | 2933.55            | 17318.80           | 2.78                           | 2492.03            | 6927.56            |
| A_68_P25949910 | chr8:72636709-72636753                            | NM_007789:8013     | Ncan       | INSIDE                 | 0.573                                                        | 0.415                          | 1865.75            | 773.94             | 0.238                          | 1415.27            | 336.17             |
| A_68_P30424721 | chr15:89186360-89186404                           | NM_001115132:230   | Ncaph2     | INSIDE                 | 0.136                                                        | 28.479                         | 3458.44            | 98491.17           | 3.877                          | 2896.90            | 11232.48           |
| A_68_P23281848 | chr4:126430490-126430534                          | NM_011986:161      | Ncdn       | INSIDE                 | 0.386                                                        | 0.242                          | 2370.16            | 573.17             | 0.093                          | 1843.55            | 172.25             |
| A_68_P26770183 | chr9:100446090-100446134                          | NM_010878:360      | Nck1       | INSIDE                 | 0.401                                                        | 4.466                          | 1380.73            | 6166.28            | 1.791                          | 1094.73            | 1960.92            |
| A_68_P20188961 | chr1:43503040-43503084                            | NM_010879:467      | Nck2       | INSIDE                 | 0.445                                                        | 4.367                          | 2316.61            | 10115.83           | 1.941                          | 1947.43            | 3780.04            |
| A_68_P21375628 | chr2:80421369-80421413                            | NM_016965:268      | Nckap1     | PROMOTER               | 0.265                                                        | 6.820                          | 76905.88           | 524509.10          | 1.808                          | 75077.69           | 135759.90          |
| A_68_P21375629 | chr2:80421545-80421589                            | NM_016965:444      | Nckap1     | PROMOTER               | 0.666                                                        | 3.131                          | 1623.05            | 5082.09            | 2.084                          | 1354.39            | 2822.61            |
| A_68_P30480085 | chr15:99256217-99256261                           | NM_001001884:31941 | Nckap5l    | INSIDE                 | 0.233                                                        | 15.731                         | 1705.75            | 26832.42           | 3.663                          | 1580.55            | 5789.30            |
| A_68_P30480282 | chr15:99287858-99287902                           | NM_001001884:299   | Nckap5l    | INSIDE                 | 0.597                                                        | 0.185                          | 6301.60            | 1164.77            | 0.11                           | 4218.41            | 465.80             |
| A_68_P30480281 | chr15:99287653-99287697                           | NM_001001884:505   | Nckap5l    | INSIDE                 | 0.631                                                        | 2.400                          | 2254.69            | 5410.69            | 1.514                          | 1503.20            | 2276.11            |
| A_68_P27290094 | chr10:80959100-80959144                           | NM_134009:14       | Ncln       | PROMOTER               | 0.421                                                        | 8.579                          | 2459.66            | 21101.18           | 3.61                           | 2053.09            | 7410.88            |
| A_68_P20040932 | chr1:13363158-13363202                            | NM_001077695:984   | Ncoa2      | INSIDE                 | 0.423                                                        | 4.337                          | 1127.25            | 4889.44            | 1.836                          | 1059.23            | 1945.12            |
| A_68_P21826986 | chr2:165818945-165818989                          | NM_008679:830      | Ncoa3      | INSIDE                 | 0.08                                                         | 2.698                          | 6374.16            | 17197.15           | 0.215                          | 4410.67            | 949.18             |
| A_68_P21826984 | chr2:165818646-165818690                          | NM_008679:532      | Ncoa3      | INSIDE                 | 0.124                                                        | 13.620                         | 12843.30           | 174919.50          | 1.684                          | 8024.59            | 13515.65           |
| A_68_P21826985 | chr2:165818808-165818852                          | NM_008679:694      | Ncoa3      | INSIDE                 | 0.154                                                        | 15.115                         | 14430.03           | 218112.70          | 2.325                          | 10179.76           | 23671.07           |
| A_68_P21826983 | chr2:165818573-165818617                          | NM_008679:458      | Ncoa3      | INSIDE                 | 0.269                                                        | 18.216                         | 5947.57            | 108339.50          | 4.902                          | 4972.87            | 24377.71           |
| A_68_P21826979 | chr2:165818066-165818110                          | NM_008679:48       | Ncoa3      | PROMOTER               | 0.435                                                        | 6.723                          | 1522.74            | 10237.25           | 2.928                          | 1451.10            | 4248.49            |
| A_68_P21826982 | chr2:165818442-165818486                          | NM_008679:328      | Ncoa3      | INSIDE                 | 0.372                                                        | 5.386                          | 717.80             | 3866.25            | 2.005                          | 746.50             | 1497.07            |
| A_68_P21821252 | chr2:164859772-164859816                          | NM_144892:485      | Ncoa5      | INSIDE                 | 0.656                                                        | 0.506                          | 1147.16            | 580.26             | 0.332                          | 859.81             | 285.34             |
| A_68_P24064307 | chr5:125507269-125507313                          | NM_011424:152294   | Ncor2      | INSIDE                 | 0.063                                                        | 58.036                         | 7291.77            | 423182.10          | 3.661                          | 8079.84            | 29580.49           |
| A_68_P24064309 | chr5:125507455-125507499                          | NM_011424:152108   | Ncor2      | INSIDE                 | 0.512                                                        | 3.995                          | 433.59             | 1731.99            | 2.044                          | 414.05             | 846.26             |
| A_68_P31075109 | chr17:17975189-17975234                           | NM_001162909:7273  | Nema00085  | INSIDE                 | 0.444                                                        | 5.830                          | 477.00             | 2781.12            | 2.589                          | 382.96             | 991.51             |
| A_68_P20830847 | chr1:174013137-174013181                          | NM_021607:278      | Ncstn      | PROMOTER               | 0.478                                                        | 0.329                          | 3203.62            | 1052.55            | 0.157                          | 2321.67            | 364.74             |
| A_68_P31334901 | chr17:71876213-71876257                           | NM_023294:37       | Ndc80      | PROMOTER               | 0.486                                                        | 5.497                          | 1961.49            | 10782.79           | 2.67                           | 1597.00            | 4264.22            |
| A_68_P30560748 | chr16:14163592-14163636                           | NM_001114085:247   | Nde1       | INSIDE                 | 0.35                                                         | 0.297                          | 3580.72            | 1063.66            | 0.104                          | 2526.63            | 262.93             |
| A_68_P30560747 | chr16:14163515-14163559                           | NM_001114085:169   | Nde1       | INSIDE                 | 0.42                                                         | 11.550                         | 15138.60           | 174851.70          | 4.847                          | 11819.43           | 57291.89           |
| A_68_P30560749 | chr16:14163667-14163711                           | NM_001114085:321   | Nde1       | INSIDE                 | 0.503                                                        | 0.604                          | 5743.11            | 3467.18            | 0.304                          | 4051.26            | 1231.38            |
| A_68_P30560744 | chr16:14163261-14163305                           | NM_001114085:85    | Nde1       | PROMOTER               | 0.601                                                        | 2.588                          | 1076.80            | 2787.25            | 1.554                          | 884.31             | 1374.62            |
| A_68_P31633859 | chr18:38578724-38578769                           | NM_022996:118      | Ndfip1     | INSIDE                 | 0.519                                                        | 4.365                          | 1315.07            | 5740.56            | 2.267                          | 1304.26            | 2956.92            |
| A_68_P25168663 | chr7:69493375-69493419                            | NM_010882:234      | Ndn        | INSIDE                 | 0.128                                                        | 31.326                         | 1608.43            | 50385.34           | 4.001                          | 1663.76            | 6656.33            |
| A_68_P25179904 | chr7:72017616-72017660                            | NM_023239:288      | Ndnf2      | INSIDE                 | 0.316                                                        | 6.239                          | 995.54             | 6210.73            | 1.969                          | 879.48             | 1731.82            |
| A_68_P21070911 | chr2:25110830-25110874                            | NM_001082476:82    | Ndor1      | INSIDE                 | 0.478                                                        | 0.316                          | 1531.68            | 484.65             | 0.151                          | 1160.37            | 175.65             |
| A_68_P30295277 | chr15:66801273-66801317                           | NM_008681:91       | Ndrp1      | PROMOTER               | 0.373                                                        | 0.521                          | 2003.32            | 1043.17            | 0.194                          | 1590.22            | 308.65             |
| A_68_P30295269 | chr15:66800435-66800479                           | NM_008681:747      | Ndrp1      | INSIDE                 | 0.485                                                        | 11.363                         | 2614.78            | 29711.21           | 5.507                          | 2356.24            | 12974.70           |

| ProbeName      | Target position of probe on CpG island microarray | TargetID           | GeneSymbol | CpG island Description | Ratio of relative methylation (TiO <sub>2</sub> -NP/Vehicle) | Sham group                     |                    |                    | TiO <sub>2</sub> -H group      |                    |                    |
|----------------|---------------------------------------------------|--------------------|------------|------------------------|--------------------------------------------------------------|--------------------------------|--------------------|--------------------|--------------------------------|--------------------|--------------------|
|                |                                                   |                    |            |                        |                                                              | Relative methylation (Cy5/Cy3) | Cy3 signal (Input) | Cy5 signal (MeDIP) | Relative methylation (Cy5/Cy3) | Cy3 signal (Input) | Cy5 signal (MeDIP) |
| A_68_P30295278 | chr15:66801372-66801416                           | NM_008681:-191     | Ndrg1      | PROMOTER               | 0.549                                                        | 0.574                          | 967.64             | 555.23             | 0.315                          | 807.17             | 254.09             |
| A_68_P29603743 | chr14:52532832-52532876                           | NM_001145959:309   | Ndrg2      | INSIDE                 | 0.66                                                         | 0.278                          | 3459.08            | 960.99             | 0.183                          | 2385.53            | 437.18             |
| A_68_P32322121 | chrX:34731184-34731228                            | NM_019443:27       | Ndufa1     | INSIDE                 | 0.303                                                        | 5.054                          | 966.91             | 4886.47            | 1.534                          | 1546.38            | 2371.58            |
| A_68_P25948620 | chr8:72427025-72427069                            | NM_023312:-589     | Ndufa13    | PROMOTER               | 0.305                                                        | 10.679                         | 862.27             | 9207.91            | 3.253                          | 775.12             | 2521.75            |
| A_68_P27536264 | chr10:126948850-126948894                         | NM_001098789:-3122 | Ndufa4I2   | PROMOTER               | 0.116                                                        | 28.470                         | 1072.48            | 30533.48           | 3.292                          | 1105.74            | 3639.85            |
| A_68_P27536275 | chr10:126950036-126950080                         | NM_001098789:-1936 | Ndufa4I2   | PROMOTER               | 0.55                                                         | 0.629                          | 1221.07            | 768.11             | 0.346                          | 973.94             | 336.92             |
| A_68_P24302044 | chr6:24477440-24477484                            | NM_026614:225      | Ndufa5     | INSIDE                 | 0.546                                                        | 0.236                          | 3311.46            | 782.61             | 0.129                          | 2359.40            | 304.52             |
| A_68_P30382971 | chr15:82184657-82184701                           | NM_025987:43       | Ndufa6     | INSIDE                 | 0.349                                                        | 19.256                         | 3679.93            | 70861.36           | 6.717                          | 3520.96            | 23651.41           |
| A_68_P30382969 | chr15:82184423-82184467                           | NM_025987:277      | Ndufa6     | INSIDE                 | 0.465                                                        | 0.467                          | 1002.34            | 468.56             | 0.217                          | 795.30             | 172.72             |
| A_68_P29309820 | chr13:108948751-108948795                         | NM_001127346:47    | Ndufaf2    | INSIDE                 | 0.449                                                        | 0.169                          | 11178.31           | 1893.75            | 0.076                          | 7221.17            | 549.56             |
| A_68_P24383895 | chr6:39542839-39542883                            | NM_026612:279      | Ndufb2     | INSIDE                 | 0.663                                                        | 0.403                          | 1163.17            | 468.46             | 0.267                          | 789.95             | 210.89             |
| A_68_P26015449 | chr8:86090778-86090822                            | NM_025843:144      | Ndufb7     | INSIDE                 | 0.553                                                        | 2.952                          | 1093.68            | 3228.74            | 1.632                          | 949.37             | 1549.77            |
| A_68_P22129479 | chr3:51212850-51212894                            | NM_025523:5        | Ndufc1     | INSIDE                 | 0.624                                                        | 0.465                          | 1382.49            | 643.32             | 0.291                          | 1181.27            | 343.23             |
| A_68_P22129477 | chr3:51212635-51212679                            | NM_025523:221      | Ndufc1     | INSIDE                 | 0.533                                                        | 0.621                          | 1738.60            | 1079.87            | 0.331                          | 1455.66            | 482.14             |
| A_68_P20285511 | chr1:63223372-63223416                            | NM_001160038:2     | Ndufs1     | INSIDE                 | 0.557                                                        | 0.457                          | 968.14             | 442.14             | 0.254                          | 799.15             | 203.17             |
| A_68_P21419564 | chr2:90744694-90744738                            | NM_026688:162      | Ndufs3     | INSIDE                 | 0.462                                                        | 0.682                          | 3159.48            | 2155.03            | 0.315                          | 2360.62            | 744.29             |
| A_68_P29139134 | chr13:73465946-73465990                           | NM_010888:-38      | Ndufs6     | DIVERGENT_PROMOTER     | 0.118                                                        | 1.497                          | 1952.79            | 2923.75            | 0.177                          | 1279.44            | 226.27             |
| A_68_P31304302 | chr17:66450798-66450842                           | NM_028388:11       | Ndufv2     | INSIDE                 | 0.452                                                        | 5.245                          | 850.84             | 4462.85            | 2.371                          | 783.17             | 1857.26            |
| A_68_P31304303 | chr17:66450941-66450985                           | NM_028388:-131     | Ndufv2     | DIVERGENT_PROMOTER     | 0.543                                                        | 4.438                          | 341.78             | 1516.97            | 2.408                          | 296.11             | 712.99             |
| A_68_P31931196 | chr19:5845867-5845911                             | NR_003513:-410     | Neat1      | PROMOTER               | 0.644                                                        | 0.271                          | 4089.18            | 1107.93            | 0.174                          | 2804.98            | 489.26             |
| A_68_P26628950 | chr9:72510550-72510594                            | NM_010890:419      | Nedd4      | INSIDE                 | 0.595                                                        | 0.561                          | 1333.10            | 747.60             | 0.334                          | 1157.43            | 386.11             |
| A_68_P31777748 | chr18:65047791-65047835                           | NM_001114386:403   | Nedd4I     | INSIDE                 | 0.455                                                        | 4.344                          | 1521.13            | 6607.43            | 1.975                          | 1346.81            | 2659.66            |
| A_68_P28977626 | chr13:41454570-41454617                           | NM_017464:-223     | Nedd9      | PROMOTER               | 0.312                                                        | 23.320                         | 596.64             | 13913.27           | 7.267                          | 753.83             | 5477.97            |
| A_68_P29689081 | chr14:68702832-68702876                           | NM_010910:914      | Nefl       | INSIDE                 | 0.499                                                        | 0.263                          | 2060.88            | 542.36             | 0.131                          | 1532.25            | 201.05             |
| A_68_P29689074 | chr14:68701856-68701900                           | NM_010910:-62      | Nefl       | PROMOTER               | 0.605                                                        | 0.269                          | 1678.36            | 452.05             | 0.163                          | 1277.45            | 208.14             |
| A_68_P20658346 | chr1:140515636-140515682                          | NM_021605:615      | Nek7       | INSIDE                 | 0.451                                                        | 0.292                          | 1628.88            | 476.07             | 0.132                          | 1313.01            | 172.92             |
| A_68_P20658349 | chr1:140515986-140516030                          | NM_021605:265      | Nek7       | INSIDE                 | 0.617                                                        | 3.842                          | 1650.05            | 6338.98            | 2.372                          | 1373.02            | 3256.17            |
| A_68_P21069553 | chr2:24909996-24910040                            | NM_001039386:120   | Nelf       | INSIDE                 | 0.645                                                        | 12.491                         | 1079.55            | 13485.03           | 8.051                          | 1149.52            | 9254.74            |
| A_68_P30458578 | chr15:95358757-95358801                           | NM_016743:359      | Nell2      | INSIDE                 | 0.499                                                        | 4.404                          | 5109.58            | 22505.05           | 2.196                          | 4233.25            | 9296.71            |
| A_68_P20937430 | chr1:193141794-193141838                          | NM_025424:181      | Nenf       | INSIDE                 | 0.503                                                        | 5.260                          | 903.83             | 4753.94            | 2.645                          | 802.00             | 2121.30            |
| A_68_P26551398 | chr9:58883897-58883941                            | NM_001042752:330   | Neo1       | INSIDE                 | 0.637                                                        | 4.150                          | 777.53             | 3226.66            | 2.642                          | 703.61             | 1858.82            |
| A_68_P22310998 | chr3:87774969-87775013                            | NM_016701:-24      | Nes        | PROMOTER               | 0.655                                                        | 0.246                          | 2865.31            | 705.86             | 0.161                          | 2156.26            | 347.75             |
| A_68_P28790554 | chr13:3917102-3917146                             | NM_019671:342      | Net1       | INSIDE                 | 0.278                                                        | 1.951                          | 4052.83            | 7905.88            | 0.543                          | 2838.92            | 1540.91            |
| A_68_P31156585 | chr17:35068472-35068516                           | NM_010893:297      | Neu1       | INSIDE                 | 0.37                                                         | 0.495                          | 1014.82            | 501.93             | 0.183                          | 940.47             | 171.98             |
| A_68_P32148153 | chr19:47254029-47254073                           | NM_021360:741      | Neur1a     | INSIDE                 | 0.348                                                        | 0.415                          | 2026.15            | 840.96             | 0.145                          | 1608.45            | 232.46             |
| A_68_P32148598 | chr19:47327938-47327982                           | NM_001163480:24628 | Neur1a     | INSIDE                 | 0.46                                                         | 6.345                          | 386.21             | 2450.60            | 2.92                           | 352.48             | 1029.32            |
| A_68_P32148144 | chr19:47253081-47253125                           | NM_021360:-207     | Neur1a     | PROMOTER               | 0.466                                                        | 4.204                          | 1639.84            | 6893.77            | 1.96                           | 1535.68            | 3010.41            |
| A_68_P32148149 | chr19:47253623-47253667                           | NM_021360:335      | Neur1a     | INSIDE                 | 0.502                                                        | 4.853                          | 1262.96            | 6128.81            | 2.434                          | 1041.90            | 2535.75            |
| A_68_P32148151 | chr19:47253878-47253922                           | NM_021360:591      | Neur1a     | INSIDE                 | 0.516                                                        | 4.278                          | 2634.78            | 11270.61           | 2.209                          | 2360.82            | 5215.09            |
| A_68_P31110244 | chr17:26575843-26575887                           | NM_001081656:23955 | Neur1b     | INSIDE                 | 0.574                                                        | 5.335                          | 348.51             | 1859.16            | 3.064                          | 441.45             | 1352.82            |
| A_68_P21368904 | chr2:79294386-79294430                            | NM_010894:2385     | Neurod1    | INSIDE                 | 0.301                                                        | 2.179                          | 2093.25            | 4562.04            | 0.657                          | 1584.45            | 1040.41            |
| A_68_P28055686 | chr11:98188438-98188482                           | NM_010895:2499     | Neurod2    | INSIDE                 | 0.288                                                        | 10.632                         | 1942.97            | 20657.70           | 3.059                          | 3056.82            | 9351.32            |
| A_68_P28055696 | chr11:98189596-98189640                           | NM_010895:1341     | Neurod2    | INSIDE                 | 0.637                                                        | 2.765                          | 784.84             | 2170.15            | 1.762                          | 617.98             | 1088.84            |
| A_68_P28055690 | chr11:98188811-98188855                           | NM_010895:2127     | Neurod2    | INSIDE                 | 0.658                                                        | 3.312                          | 400.92             | 1327.88            | 2.178                          | 339.98             | 740.57             |
| A_68_P29060115 | chr13:56353410-56353454                           | NM_010896:92       | Neurog1    | INSIDE                 | 0.498                                                        | 0.383                          | 3239.29            | 1239.24            | 0.19                           | 2356.87            | 448.76             |
| A_68_P29060176 | chr13:56360497-56360541                           | NM_010896:-6994    | Neurog1    | PROMOTER               | 0.659                                                        | 0.224                          | 2315.77            | 518.76             | 0.148                          | 1728.74            | 255.30             |

| ProbeName      | Target position of probe on CpG island microarray | TargetID           | GeneSymbol | CpG island Description | Ratio of relative methylation (TiO <sub>2</sub> -NP/Vehicle) | Sham group                     |                    |                    | TiO <sub>2</sub> -H group      |                    |                    |
|----------------|---------------------------------------------------|--------------------|------------|------------------------|--------------------------------------------------------------|--------------------------------|--------------------|--------------------|--------------------------------|--------------------|--------------------|
|                |                                                   |                    |            |                        |                                                              | Relative methylation (Cy5/Cy3) | Cy3 signal (Input) | Cy5 signal (MeDIP) | Relative methylation (Cy5/Cy3) | Cy3 signal (Input) | Cy5 signal (MeDIP) |
| A_68_P29060118 | chr13:56353718-56353762                           | NM_010896:216      | Neurog1    | PROMOTER               | 0.32                                                         | 0.614                          | 1542.28            | 946.22             | 0.196                          | 1264.18            | 248.07             |
| A_68_P29060175 | chr13:56360319-56360363                           | NM_010896:6816     | Neurog1    | PROMOTER               | 0.275                                                        | 0.639                          | 1271.81            | 812.57             | 0.175                          | 971.58             | 170.49             |
| A_68_P22509735 | chr3:127337358-127337402                          | NM_009718:1318     | Neurog2    | INSIDE                 | 0.337                                                        | 1.743                          | 5601.73            | 9762.48            | 0.588                          | 3839.53            | 2257.47            |
| A_68_P22509720 | chr3:127335433-127335477                          | NM_009718:-608     | Neurog2    | PROMOTER               | 0.561                                                        | 3.202                          | 903.88             | 2894.18            | 1.797                          | 797.87             | 1434.11            |
| A_68_P27560010 | chr11:4749422-4749466                             | NM_010898:86       | Nf2        | INSIDE                 | 0.559                                                        | 3.269                          | 3759.12            | 12286.85           | 1.826                          | 3179.59            | 5806.33            |
| A_68_P27560006 | chr11:4749005-4749049                             | NM_010898:504      | Nf2        | INSIDE                 | 0.492                                                        | 3.373                          | 1363.62            | 4599.38            | 1.658                          | 1073.49            | 1780.16            |
| A_68_P26143993 | chr8:109817338-109817382                          | NM_018823:-9       | Nfat5      | PROMOTER               | 0.343                                                        | 5.039                          | 1829.94            | 9221.48            | 1.73                           | 1635.44            | 2829.08            |
| A_68_P31866219 | chr18:80894683-80894727                           | NM_001164111:10208 | Nfatc1     | INSIDE                 | 0.216                                                        | 12.780                         | 2035.02            | 26007.20           | 2.761                          | 1634.42            | 4513.11            |
| A_68_P31866345 | chr18:80909646-80909690                           | NM_001164111:-4756 | Nfatc1     | PROMOTER               | 0.425                                                        | 8.808                          | 4112.32            | 36223.16           | 3.747                          | 3107.60            | 11643.24           |
| A_68_P31866342 | chr18:80909356-80909400                           | NM_001164111:-4466 | Nfatc1     | PROMOTER               | 0.431                                                        | 5.681                          | 1199.37            | 6813.49            | 2.45                           | 1088.29            | 2666.60            |
| A_68_P31866300 | chr18:80904546-80904590                           | NM_001164111:344   | Nfatc1     | INSIDE                 | 0.578                                                        | 4.621                          | 725.60             | 3352.71            | 2.67                           | 730.02             | 1949.24            |
| A_68_P31866306 | chr18:80905336-80905380                           | NM_001164111:-446  | Nfatc1     | PROMOTER               | 0.631                                                        | 3.247                          | 1144.24            | 3715.40            | 2.048                          | 973.67             | 1994.51            |
| A_68_P21842271 | chr2:168396389-168396433                          | NM_001136073:19281 | Nfatc2     | INSIDE                 | 0.282                                                        | 6.908                          | 3048.11            | 21056.47           | 1.948                          | 2529.71            | 4927.51            |
| A_68_P21842272 | chr2:168396475-168396519                          | NM_001136073:19195 | Nfatc2     | INSIDE                 | 0.339                                                        | 5.172                          | 3385.24            | 17509.07           | 1.753                          | 2818.87            | 4940.67            |
| A_68_P21842270 | chr2:168396257-168396301                          | NM_001136073:19413 | Nfatc2     | INSIDE                 | 0.574                                                        | 4.099                          | 1596.65            | 6544.04            | 2.351                          | 1163.11            | 2735.04            |
| A_68_P21842488 | chr2:168427130-168427174                          | NM_001037178:3     | Nfatc2     | INSIDE                 | 0.642                                                        | 4.490                          | 4171.85            | 18730.44           | 2.881                          | 3164.34            | 9115.15            |
| A_68_P21842487 | chr2:168427037-168427082                          | NM_001037178:96    | Nfatc2     | INSIDE                 | 0.372                                                        | 0.724                          | 2443.08            | 1769.22            | 0.269                          | 1936.66            | 521.42             |
| A_68_P22500257 | chr7:133539825-133539869                          | NM_010900:405      | Nfatc2ip   | INSIDE                 | 0.49                                                         | 0.275                          | 4412.28            | 1213.80            | 0.135                          | 3227.23            | 434.80             |
| A_68_P26137548 | chr8:108583970-108584014                          | NM_010901:490      | Nfatc3     | INSIDE                 | 0.56                                                         | 11.038                         | 2434.95            | 26875.81           | 6.18                           | 1748.50            | 10805.21           |
| A_68_P29620076 | chr14:56445768-56445812                           | NM_001168346:2159  | Nfatc4     | INSIDE                 | 0.53                                                         | 11.745                         | 3614.20            | 42448.87           | 6.219                          | 2890.61            | 17977.55           |
| A_68_P29620045 | chr14:56442427-56442471                           | NM_001168346:-1183 | Nfatc4     | PROMOTER               | 0.511                                                        | 5.786                          | 407.11             | 2355.72            | 2.956                          | 317.22             | 937.78             |
| A_68_P29620075 | chr14:56445685-56445729                           | NM_001168346:2075  | Nfatc4     | INSIDE                 | 0.287                                                        | 1.749                          | 1506.44            | 2634.98            | 0.502                          | 1123.27            | 563.76             |
| A_68_P21345534 | chr2:75542163-75542207                            | NM_010902:514      | Nfe2l2     | INSIDE                 | 0.497                                                        | 0.525                          | 3075.90            | 1615.98            | 0.261                          | 2249.17            | 587.23             |
| A_68_P24444193 | chr6:51382790-51382834                            | NM_010903:144      | Nfe2l3     | INSIDE                 | 0.528                                                        | 0.729                          | 1893.21            | 1379.86            | 0.385                          | 1293.98            | 498.02             |
| A_68_P23134369 | chr4:97445584-97445628                            | NM_001122953:1290  | Nfia       | INSIDE                 | 0.43                                                         | 0.463                          | 1070.36            | 495.89             | 0.199                          | 855.00             | 170.25             |
| A_68_P23134316 | chr4:97438997-97439041                            | NM_001122953:-5298 | Nfia       | PROMOTER               | 0.463                                                        | 4.056                          | 2680.83            | 10873.67           | 1.877                          | 1982.51            | 3720.53            |
| A_68_P23134368 | chr4:97445476-97445520                            | NM_001122953:1182  | Nfia       | INSIDE                 | 0.559                                                        | 3.582                          | 2784.93            | 9974.79            | 2.002                          | 2389.50            | 4783.02            |
| A_68_P23057176 | chr4:82151139-82151183                            | NM_001113209:52    | Nfib       | INSIDE                 | 0.391                                                        | 0.330                          | 1869.09            | 616.40             | 0.129                          | 1337.80            | 172.40             |
| A_68_P23057168 | chr4:82150339-82150383                            | NM_001113209:852   | Nfib       | INSIDE                 | 0.517                                                        | 3.404                          | 1649.54            | 5615.10            | 1.759                          | 1356.58            | 2386.09            |
| A_68_P27289568 | chr10:80882945-80882989                           | NM_008688:6952     | Nfic       | INSIDE                 | 0.664                                                        | 3.658                          | 1823.73            | 6671.19            | 2.43                           | 1568.48            | 3810.97            |
| A_68_P29041280 | chr13:53076043-53076087                           | NM_017373:344      | Nfil3      | INSIDE                 | 0.24                                                         | 1.799                          | 896.73             | 1613.52            | 0.431                          | 714.08             | 307.99             |
| A_68_P26021284 | chr8:87230641-87230685                            | NM_001081981:67606 | Nfix       | DOWNSTREAM             | 0.333                                                        | 11.660                         | 4981.59            | 58087.59           | 3.889                          | 4195.03            | 16312.64           |
| A_68_P26021287 | chr8:87230962-87231012                            | NM_001081981:67282 | Nfix       | DOWNSTREAM             | 0.622                                                        | 10.542                         | 893.18             | 9415.44            | 6.559                          | 726.21             | 4763.02            |
| A_68_P31201770 | chr17:45692568-45692612                           | NM_008690:-74      | Nfkbie     | DIVERGENT_PROMOTER     | 0.227                                                        | 37.318                         | 8887.28            | 331655.00          | 8.478                          | 10161.13           | 86145.20           |
| A_68_P31158451 | chr17:35371961-35372005                           | NM_010909:778      | Nfkbil1    | INSIDE                 | 0.58                                                         | 8.555                          | 4924.99            | 42132.90           | 4.959                          | 4541.31            | 22520.14           |
| A_68_P31158453 | chr17:35372182-35372226                           | NM_010909:556      | Nfkbil1    | INSIDE                 | 0.599                                                        | 0.443                          | 3503.53            | 1553.16            | 0.266                          | 2514.34            | 667.78             |
| A_68_P30777937 | chr16:55822273-55822317                           | NM_001159394:-43   | Nfkbiz     | PROMOTER               | 0.456                                                        | 3.572                          | 2191.77            | 7828.68            | 1.629                          | 1734.26            | 2825.88            |
| A_68_P26400214 | chr9:31193743-31193787                            | NM_172766:-12      | Nfrkb      | PROMOTER               | 0.628                                                        | 3.245                          | 1217.65            | 3950.90            | 2.038                          | 1064.90            | 2169.98            |
| A_68_P24613352 | chr6:86959758-86959802                            | NM_001170591:-49   | Nfu1       | PROMOTER               | 0.177                                                        | 21.636                         | 2939.88            | 63607.49           | 3.82                           | 2422.74            | 9254.97            |
| A_68_P31217293 | chr17:48549071-48549115                           | NM_001110832:53    | Nfya       | INSIDE                 | 0.626                                                        | 0.632                          | 5257.62            | 3322.28            | 0.395                          | 3696.04            | 1461.68            |
| A_68_P27293632 | chr10:82226781-82226825                           | NM_010914:84       | Nfyb       | INSIDE                 | 0.294                                                        | 0.387                          | 2243.73            | 869.13             | 0.114                          | 1479.04            | 168.38             |
| A_68_P27293629 | chr10:82226162-82226206                           | NM_010914:702      | Nfyb       | INSIDE                 | 0.555                                                        | 0.475                          | 2155.53            | 1023.52            | 0.264                          | 1611.26            | 424.79             |
| A_68_P28614148 | chr12:88443473-88443517                           | NM_022414:-5       | Ngb        | PROMOTER               | 0.255                                                        | 0.585                          | 2310.43            | 1352.54            | 0.149                          | 1809.69            | 270.13             |
| A_68_P28614145 | chr12:88443030-88443074                           | NM_022414:437      | Ngb        | INSIDE                 | 0.332                                                        | 0.377                          | 4379.42            | 1653.02            | 0.125                          | 2907.70            | 364.08             |
| A_68_P22381100 | chr3:102273874-102273918                          | NM_001112698:46    | Ngf        | INSIDE                 | 0.511                                                        | 0.658                          | 1415.40            | 931.85             | 0.337                          | 1289.62            | 434.10             |
| A_68_P29428095 | chr14:17075686-17075730                           | NM_021504:-6119    | Ngly1      | PROMOTER               | 0.374                                                        | 0.678                          | 846.93             | 574.10             | 0.253                          | 692.36             | 175.41             |

| ProbeName      | Target position of probe on CpG island microarray | TargetID            | GeneSymbol | CpG island Description | Ratio of relative methylation (TiO <sub>2</sub> -NP/Vehicle) | Sham group                     |                    |                    | TiO <sub>2</sub> -H group      |                    |                    |
|----------------|---------------------------------------------------|---------------------|------------|------------------------|--------------------------------------------------------------|--------------------------------|--------------------|--------------------|--------------------------------|--------------------|--------------------|
|                |                                                   |                     |            |                        |                                                              | Relative methylation (Cy5/Cy3) | Cy3 signal (Input) | Cy5 signal (MeDIP) | Relative methylation (Cy5/Cy3) | Cy3 signal (Input) | Cy5 signal (MeDIP) |
| A_68_P25265632 | chr7:87406421-87406465                            | NM_031375:342       | Ngrn       | INSIDE                 | 0.261                                                        | 7.316                          | 679.21             | 4969.41            | 1.911                          | 606.99             | 1160.01            |
| A_68_P20352133 | chr1:75121786-75121830                            | NM_029342:-8        | Nhej1      | PROMOTER               | 0.599                                                        | 5.239                          | 3063.74            | 16050.80           | 3.136                          | 2370.17            | 7432.34            |
| A_68_P20830643 | chr1:173984062-173984107                          | NM_010916:3643      | Nhlh1      | INSIDE                 | 0.316                                                        | 0.410                          | 3467.82            | 1421.76            | 0.129                          | 2660.89            | 344.49             |
| A_68_P22378552 | chr3:101816741-101816785                          | NM_178777:2695      | Nhlh2      | INSIDE                 | 0.512                                                        | 9.241                          | 3911.69            | 36146.64           | 4.734                          | 4109.68            | 19454.39           |
| A_68_P22378540 | chr3:101815556-101815600                          | NM_178777:1511      | Nhlh2      | INSIDE                 | 0.47                                                         | 3.073                          | 1741.84            | 5352.33            | 1.445                          | 1397.40            | 2018.78            |
| A_68_P29011114 | chr13:47109579-47109623                           | NM_175340:619       | Nhlrc1     | INSIDE                 | 0.45                                                         | 0.483                          | 1269.77            | 613.21             | 0.217                          | 964.99             | 209.81             |
| A_68_P32201471 | chr19:56623197-56623241                           | NM_025811:468       | Nhlrc2     | INSIDE                 | 0.557                                                        | 3.969                          | 717.90             | 2849.64            | 2.211                          | 559.90             | 1238.01            |
| A_68_P27794924 | chr11:51433455-51433500                           | NM_026631:203       | Nhp2       | INSIDE                 | 0.458                                                        | 9.857                          | 4475.98            | 44120.24           | 4.512                          | 3361.27            | 15164.94           |
| A_68_P27794923 | chr11:51433377-51433421                           | NM_026631:124       | Nhp2       | INSIDE                 | 0.587                                                        | 0.203                          | 5265.55            | 1066.93            | 0.119                          | 3376.50            | 401.88             |
| A_68_P32786683 | chrX:158346162-158346206                          | NM_001081052:251538 | Nhs        | INSIDE                 | 0.45                                                         | 7.088                          | 1681.66            | 11919.76           | 3.189                          | 1982.16            | 6320.56            |
| A_68_P32565869 | chrX:99044829-99044873                            | NM_001163610:127    | NhsI2      | INSIDE                 | 0.465                                                        | 7.985                          | 799.76             | 6386.04            | 3.716                          | 988.31             | 3672.92            |
| A_68_P32565872 | chrX:99045232-99045276                            | NM_001163610:531    | NhsI2      | INSIDE                 | 0.303                                                        | 5.776                          | 1308.33            | 7557.35            | 1.753                          | 1458.87            | 2557.02            |
| A_68_P32565875 | chrX:99045611-99045655                            | NM_001163610:909    | NhsI2      | INSIDE                 | 0.26                                                         | 6.056                          | 1100.16            | 6662.80            | 1.577                          | 1575.40            | 2483.94            |
| A_68_P32565873 | chrX:99045311-99045356                            | NM_001163610:610    | NhsI2      | INSIDE                 | 0.541                                                        | 2.891                          | 722.32             | 2088.17            | 1.565                          | 1169.86            | 1830.77            |
| A_68_P29443159 | chr14:20570751-20570795                           | NM_008695:294       | Nid2       | INSIDE                 | 0.457                                                        | 0.398                          | 1200.76            | 478.07             | 0.182                          | 941.00             | 171.17             |
| A_68_P28518531 | chr12:71213190-71213234                           | NM_008697:-300      | Nin        | PROMOTER               | 0.478                                                        | 5.415                          | 2061.35            | 11161.33           | 2.591                          | 1967.58            | 5097.48            |
| A_68_P29023779 | chr13:49283004-49283048                           | NM_013610:111       | Ninj1      | INSIDE                 | 0.29                                                         | 13.879                         | 3481.65            | 48321.28           | 4.03                           | 2771.27            | 11166.86           |
| A_68_P25144564 | chr7:63274831-63274875                            | NM_153578:91        | Nipa1      | INSIDE                 | 0.539                                                        | 9.088                          | 4070.28            | 36990.41           | 4.895                          | 3323.25            | 16265.73           |
| A_68_P25144266 | chr7:63217700-63217744                            | NM_023647:98        | Nipa2      | INSIDE                 | 0.6                                                          | 2.662                          | 1358.98            | 3617.97            | 1.597                          | 1139.05            | 1819.52            |
| A_68_P23328804 | chr4:135050696-135050741                          | NM_028995:-299      | Nipal3     | DIVERGENT_PROMOTER     | 0.532                                                        | 3.806                          | 2610.23            | 9935.07            | 2.023                          | 2233.58            | 4518.58            |
| A_68_P30000046 | chr15:8394229-8394273                             | NM_027707:213       | Nipbl      | INSIDE                 | 0.499                                                        | 0.248                          | 2697.71            | 667.81             | 0.124                          | 2196.74            | 271.52             |
| A_68_P30000045 | chr15:8394103-8394149                             | NM_027707:337       | Nipbl      | INSIDE                 | 0.506                                                        | 0.518                          | 1117.19            | 578.37             | 0.262                          | 798.15             | 209.14             |
| A_68_P22920590 | chr4:53025131-53025175                            | NM_025623:357       | Nipsnap3b  | INSIDE                 | 0.206                                                        | 0.560                          | 10475.14           | 5867.79            | 0.115                          | 6766.69            | 780.64             |
| A_68_P22920589 | chr4:53024957-53025001                            | NM_025623:183       | Nipsnap3b  | INSIDE                 | 0.392                                                        | 0.482                          | 3402.69            | 1639.34            | 0.189                          | 2167.24            | 409.72             |
| A_68_P29510442 | chr14:32019467-32019511                           | NM_022656:524       | Nisch      | INSIDE                 | 0.096                                                        | 3.541                          | 5906.63            | 20912.64           | 0.341                          | 3987.25            | 1361.17            |
| A_68_P29510250 | chr14:31989817-31989861                           | NM_022656:30174     | Nisch      | INSIDE                 | 0.486                                                        | 3.651                          | 2426.73            | 8860.46            | 1.774                          | 1879.25            | 3334.18            |
| A_68_P29510249 | chr14:31989749-31989793                           | NM_022656:30242     | Nisch      | INSIDE                 | 0.612                                                        | 3.771                          | 3111.65            | 11734.73           | 2.307                          | 2104.36            | 4854.98            |
| A_68_P29510443 | chr14:32019604-32019648                           | NM_022656:386       | Nisch      | INSIDE                 | 0.641                                                        | 0.518                          | 1688.69            | 874.43             | 0.332                          | 1213.28            | 402.47             |
| A_68_P27050627 | chr10:32609677-32609721                           | NM_001013411:23     | Nkain2     | INSIDE                 | 0.368                                                        | 24.737                         | 4079.18            | 100907.80          | 9.097                          | 3408.48            | 31006.78           |
| A_68_P27050630 | chr10:32610114-32610158                           | NM_001013411:-415   | Nkain2     | PROMOTER               | 0.504                                                        | 0.280                          | 3607.54            | 1008.97            | 0.141                          | 2584.79            | 364.18             |
| A_68_P22771644 | chr4:20705685-20705729                            | NM_172987:109       | Nkain3     | INSIDE                 | 0.645                                                        | 0.430                          | 2626.42            | 1128.41            | 0.277                          | 2023.30            | 561.00             |
| A_68_P21907361 | chr2:180689354-180689398                          | NM_001141933:28     | Nkain4     | INSIDE                 | 0.656                                                        | 0.156                          | 4928.05            | 766.40             | 0.102                          | 3255.60            | 331.96             |
| A_68_P21907359 | chr2:180689094-180689138                          | NM_001141933:288    | Nkain4     | INSIDE                 | 0.331                                                        | 5.707                          | 1384.59            | 7902.08            | 1.889                          | 1114.76            | 2105.55            |
| A_68_P32321829 | chrX:34667041-34667085                            | NM_025937:305       | Nkap       | INSIDE                 | 0.507                                                        | 3.127                          | 630.52             | 1971.66            | 1.584                          | 900.97             | 1427.23            |
| A_68_P28873012 | chr13:21560534-21560582                           | NM_025719:-188      | NkapI      | PROMOTER               | 0.63                                                         | 9.861                          | 784.72             | 7738.18            | 6.215                          | 673.85             | 4188.18            |
| A_68_P28873011 | chr13:21560407-21560451                           | NM_025719:-58       | NkapI      | PROMOTER               | 0.649                                                        | 7.033                          | 2394.40            | 16840.05           | 4.566                          | 2088.69            | 9536.99            |
| A_68_P26041379 | chr8:91045377-91045421                            | NM_001163660:-6133  | Nkd1       | PROMOTER               | 0.42                                                         | 11.401                         | 5071.43            | 57820.92           | 4.784                          | 4077.82            | 19508.96           |
| A_68_P26041378 | chr8:91045300-91045344                            | NM_001163660:-6209  | Nkd1       | PROMOTER               | 0.578                                                        | 4.337                          | 538.07             | 2333.87            | 2.505                          | 574.02             | 1437.96            |
| A_68_P26041381 | chr8:91045707-91045751                            | NM_001163660:-5803  | Nkd1       | PROMOTER               | 0.495                                                        | 1.493                          | 7560.62            | 11290.25           | 0.74                           | 5562.55            | 4115.86            |
| A_68_P29142604 | chr13:73984411-73984456                           | NM_028186:646       | Nkd2       | INSIDE                 | 0.438                                                        | 4.886                          | 1546.45            | 7556.67            | 2.138                          | 1315.74            | 2813.48            |
| A_68_P29437788 | chr14:19103568-19103612                           | NM_023526:-65       | Nkiras1    | DIVERGENT_PROMOTER     | 0.642                                                        | 0.549                          | 804.74             | 441.76             | 0.352                          | 639.87             | 225.36             |
| A_68_P24993775 | chr7:20108712-20108756                            | NM_027116:4655      | Nkpd1      | INSIDE                 | 0.46                                                         | 5.174                          | 1826.86            | 9452.17            | 2.38                           | 1648.04            | 3921.96            |
| A_68_P28457455 | chr12:57637056-57637100                           | NM_001146198:-985   | Nkx2-1     | PROMOTER               | 0.256                                                        | 0.340                          | 2657.43            | 903.15             | 0.087                          | 2045.88            | 178.03             |
| A_68_P28457457 | chr12:57637250-57637294                           | NM_001146198:-1179  | Nkx2-1     | PROMOTER               | 0.433                                                        | 0.172                          | 3414.35            | 586.84             | 0.074                          | 2308.87            | 171.73             |
| A_68_P28457433 | chr12:57634159-57634203                           | NM_001146198:1913   | Nkx2-1     | INSIDE                 | 0.437                                                        | 9.371                          | 2054.35            | 19250.91           | 4.095                          | 1835.58            | 7516.56            |
| A_68_P21722817 | chr2:147019650-147019694                          | NM_001077632:-7534  | Nkx2-2     | PROMOTER               | 0.261                                                        | 8.137                          | 1733.54            | 14105.00           | 2.127                          | 1602.07            | 3408.38            |

| ProbeName      | Target position of probe on CpG island microarray | TargetID           | GeneSymbol | CpG island Description | Ratio of relative methylation (TiO <sub>2</sub> -NP/Vehicle) | Sham group                     |                    |                    | TiO <sub>2</sub> -H group      |                    |                    |
|----------------|---------------------------------------------------|--------------------|------------|------------------------|--------------------------------------------------------------|--------------------------------|--------------------|--------------------|--------------------------------|--------------------|--------------------|
|                |                                                   |                    |            |                        |                                                              | Relative methylation (Cy5/Cy3) | Cy3 signal (Input) | Cy5 signal (MeDIP) | Relative methylation (Cy5/Cy3) | Cy3 signal (Input) | Cy5 signal (MeDIP) |
| A_68_P21722826 | chr2:147020543-147020587                          | NM_001077632:-8426 | Nkx2-2     | PROMOTER               | 0.628                                                        | 7.919                          | 1016.60            | 8050.39            | 4.975                          | 1029.27            | 5120.29            |
| A_68_P21722727 | chr2:147009567-147009611                          | NR_030769:-230     | Nkx2-2as   | PROMOTER               | 0.628                                                        | 5.155                          | 367.62             | 1895.17            | 3.24                           | 341.48             | 1106.34            |
| A_68_P21722730 | chr2:147009969-147010013                          | NR_030769:172      | Nkx2-2as   | INSIDE                 | 0.463                                                        | 0.652                          | 1075.49            | 701.07             | 0.302                          | 881.04             | 265.70             |
| A_68_P21722728 | chr2:147009701-147009745                          | NR_030769:-96      | Nkx2-2as   | PROMOTER               | 0.532                                                        | 3.029                          | 976.25             | 2957.54            | 1.612                          | 835.70             | 1346.76            |
| A_68_P32127607 | chr19:43691200-43691244                           | NM_008699:4408     | Nkx2-3     | DOWNSTREAM             | 0.617                                                        | 0.680                          | 1225.57            | 833.76             | 0.42                           | 1122.07            | 471.31             |
| A_68_P21722283 | chr2:146909704-146909748                          | NM_023504:1355     | Nkx2-4     | INSIDE                 | 0.357                                                        | 24.441                         | 1977.10            | 48322.77           | 8.734                          | 2308.60            | 20163.81           |
| A_68_P21722284 | chr2:146909810-146909854                          | NM_023504:1249     | Nkx2-4     | INSIDE                 | 0.561                                                        | 4.038                          | 665.38             | 2686.79            | 2.263                          | 619.35             | 1401.86            |
| A_68_P31112722 | chr17:26978019-26978063                           | NM_008700:470      | Nkx2-5     | INSIDE                 | 0.315                                                        | 7.467                          | 1792.28            | 13382.51           | 2.353                          | 1521.12            | 3579.00            |
| A_68_P31112710 | chr17:26976655-26976699                           | NM_008700:1834     | Nkx2-5     | INSIDE                 | 0.523                                                        | 2.877                          | 1768.16            | 5087.29            | 1.505                          | 1500.18            | 2257.29            |
| A_68_P28457808 | chr12:57713134-57713178                           | NM_008701:1115     | Nkx2-9     | INSIDE                 | 0.267                                                        | 14.732                         | 1200.77            | 17689.43           | 3.932                          | 987.09             | 3880.83            |
| A_68_P23637417 | chr5:42154620-42154664                            | NM_007524:817      | Nkx3-2     | INSIDE                 | 0.359                                                        | 4.189                          | 3864.90            | 16189.79           | 1.504                          | 3176.98            | 4778.06            |
| A_68_P23936334 | chr5:102093547-102093591                          | NM_144955:162      | Nkx6-1     | INSIDE                 | 0.58                                                         | 4.212                          | 2521.18            | 10619.86           | 2.443                          | 1974.42            | 4824.33            |
| A_68_P23936342 | chr5:102094436-102094480                          | NM_144955:-728     | Nkx6-1     | PROMOTER               | 0.396                                                        | 0.553                          | 1115.14            | 616.49             | 0.219                          | 942.62             | 206.38             |
| A_68_P23936340 | chr5:102094274-102094318                          | NM_144955:-566     | Nkx6-1     | PROMOTER               | 0.156                                                        | 11.627                         | 1446.15            | 16814.93           | 1.818                          | 1209.71            | 2199.09            |
| A_68_P23936338 | chr5:102094059-102094103                          | NM_144955:-350     | Nkx6-1     | PROMOTER               | 0.588                                                        | 0.659                          | 835.84             | 551.23             | 0.388                          | 697.70             | 270.55             |
| A_68_P25578920 | chr7:146770604-146770648                          | NR_027857:-1930    | Nkx6-2     | PROMOTER               | 0.311                                                        | 49.669                         | 1337.28            | 66421.38           | 15.457                         | 1221.97            | 18888.29           |
| A_68_P25578890 | chr7:146767389-146767434                          | NR_027857:1285     | Nkx6-2     | INSIDE                 | 0.411                                                        | 0.193                          | 3293.94            | 634.45             | 0.079                          | 2164.76            | 171.50             |
| A_68_P25578901 | chr7:146768634-146768678                          | NR_027857:40       | Nkx6-2     | INSIDE                 | 0.54                                                         | 9.953                          | 4461.07            | 44398.86           | 5.37                           | 3552.49            | 19076.38           |
| A_68_P25578895 | chr7:146768050-146768094                          | NR_027857:624      | Nkx6-2     | INSIDE                 | 0.56                                                         | 5.980                          | 1981.70            | 11850.74           | 3.35                           | 1544.38            | 5173.00            |
| A_68_P25715145 | chr8:24268305-24268349                            | NM_029002:4584     | Nkx6-3     | INSIDE                 | 0.389                                                        | 11.930                         | 1692.05            | 20185.67           | 4.637                          | 1416.13            | 6566.50            |
| A_68_P27969032 | chr11:82721609-82721653                           | NM_145431:267      | Nle1       | INSIDE                 | 0.64                                                         | 0.637                          | 1634.68            | 1041.90            | 0.408                          | 1275.09            | 519.74             |
| A_68_P27969033 | chr11:82721735-82721779                           | NM_145431:141      | Nle1       | INSIDE                 | 0.43                                                         | 1.530                          | 2330.49            | 3566.62            | 0.658                          | 1825.16            | 1200.84            |
| A_68_P22006134 | chr3:26230520-26230564                            | NM_138666:289      | Nlgn1      | INSIDE                 | 0.391                                                        | 0.574                          | 1757.74            | 1009.26            | 0.225                          | 1366.86            | 306.96             |
| A_68_P22222507 | chr3:69525834-69525878                            | NM_133787:-120     | Nmd3       | PROMOTER               | 0.325                                                        | 10.646                         | 9105.78            | 96938.22           | 3.464                          | 7798.13            | 27009.25           |
| A_68_P22222508 | chr3:69525922-69525966                            | NM_133787:-32      | Nmd3       | PROMOTER               | 0.617                                                        | 0.364                          | 1555.03            | 565.39             | 0.224                          | 1097.87            | 246.18             |
| A_68_P28029989 | chr11:93817362-93817406                           | NM_008705:-63      | Nme2       | PROMOTER               | 0.123                                                        | 26.780                         | 2655.28            | 71107.23           | 3.291                          | 2215.75            | 7293.03            |
| A_68_P31108289 | chr17:26232390-26232434                           | NM_019731:3        | Nme4       | INSIDE                 | 0.635                                                        | 4.440                          | 796.63             | 3536.95            | 2.818                          | 760.29             | 2142.47            |
| A_68_P20788410 | chr1:166237694-166237738                          | NM_178071:-89      | Nme7       | DIVERGENT_PROMOTER     | 0.309                                                        | 12.094                         | 631.18             | 7633.34            | 3.735                          | 546.38             | 2040.66            |
| A_68_P20961515 | chr2:3201949-3201993                              | NM_008708:411      | Nmt2       | INSIDE                 | 0.64                                                         | 0.568                          | 1655.99            | 940.02             | 0.363                          | 593.47             | 215.52             |
| A_68_P21777851 | chr2:157386103-157386147                          | NM_010923:279      | Nnat       | INSIDE                 | 0.151                                                        | 17.161                         | 4277.47            | 73403.65           | 2.592                          | 3325.14            | 8617.58            |
| A_68_P21777850 | chr2:157385964-157386008                          | NM_010923:141      | Nnat       | INSIDE                 | 0.157                                                        | 3.827                          | 1567.94            | 5999.97            | 0.602                          | 1236.91            | 744.48             |
| A_68_P29372955 | chr13:120197789-120197833                         | NM_008710:8        | Nnt        | INSIDE                 | 0.583                                                        | 0.408                          | 2565.80            | 1045.69            | 0.238                          | 1858.87            | 441.94             |
| A_68_P26144747 | chr8:109949061-109949105                          | NM_026277:-144     | Nob1       | PROMOTER               | 0.562                                                        | 3.890                          | 1531.84            | 5959.37            | 2.185                          | 1194.34            | 2609.62            |
| A_68_P24466341 | chr6:54894000-54894044                            | NM_001171007:27633 | Nod1       | INSIDE                 | 0.413                                                        | 3.424                          | 1682.55            | 5760.32            | 1.414                          | 1511.80            | 2137.28            |
| A_68_P28004910 | chr11:89163525-89163569                           | NM_008711:327      | Nog        | INSIDE                 | 0.09                                                         | 21.710                         | 2367.84            | 51404.87           | 1.96                           | 1992.65            | 3905.11            |
| A_68_P28004885 | chr11:89160628-89160672                           | NM_008711:3223     | Nog        | DOWNSTREAM             | 0.612                                                        | 0.624                          | 1589.54            | 991.91             | 0.382                          | 1233.74            | 470.86             |
| A_68_P28269967 | chr12:17355126-17355170                           | NM_001008421:-150  | Nol10      | PROMOTER               | 0.593                                                        | 2.395                          | 2944.51            | 7052.57            | 1.421                          | 2295.60            | 3262.86            |
| A_68_P28105679 | chr11:107050342-107050386                         | NM_001161329:331   | Nol11      | INSIDE                 | 0.237                                                        | 8.081                          | 3296.09            | 26634.14           | 1.916                          | 2616.05            | 5012.78            |
| A_68_P30363285 | chr15:78765693-78765737                           | NM_133800:352      | Nol12      | INSIDE                 | 0.599                                                        | 4.528                          | 942.00             | 4265.29            | 2.714                          | 857.93             | 2328.24            |
| A_68_P30363284 | chr15:78765610-78765654                           | NM_133800:270      | Nol12      | INSIDE                 | 0.653                                                        | 0.503                          | 950.05             | 478.26             | 0.329                          | 874.71             | 287.47             |
| A_68_P26132669 | chr8:107800240-107800284                          | NM_030152:-84      | Nol3       | PROMOTER               | 0.633                                                        | 0.691                          | 9516.51            | 6578.33            | 0.438                          | 6741.36            | 2949.47            |
| A_68_P26132670 | chr8:107800360-107800404                          | NM_030152:36       | Nol3       | INSIDE                 | 0.555                                                        | 0.720                          | 1356.17            | 975.88             | 0.399                          | 1098.86            | 438.73             |
| A_68_P31552995 | chr18:23197987-23198031                           | NM_001161483:-844  | Nol4       | PROMOTER               | 0.463                                                        | 4.856                          | 4197.94            | 20385.93           | 2.249                          | 3539.10            | 7959.97            |
| A_68_P31553001 | chr18:23198592-23198636                           | NM_001161483:-1450 | Nol4       | PROMOTER               | 0.629                                                        | 3.115                          | 949.51             | 2957.68            | 1.958                          | 753.86             | 1476.42            |
| A_68_P28989932 | chr13:43493670-43493714                           | NM_023554:-52      | Nol7       | PROMOTER               | 0.235                                                        | 0.695                          | 1242.94            | 864.13             | 0.163                          | 1059.95            | 172.92             |
| A_68_P23416174 | chr4:151413616-151413660                          | NM_001159599:203   | Nol9       | INSIDE                 | 0.359                                                        | 0.662                          | 1332.79            | 881.76             | 0.237                          | 1033.59            | 245.20             |

| ProbeName      | Target position of probe on CpG island microarray | TargetID           | GeneSymbol | CpG island Description | Ratio of relative methylation (TiO <sub>2</sub> -NP/Vehicle) | Sham group                     |                    |                    | TiO <sub>2</sub> -H group      |                    |                    |
|----------------|---------------------------------------------------|--------------------|------------|------------------------|--------------------------------------------------------------|--------------------------------|--------------------|--------------------|--------------------------------|--------------------|--------------------|
|                |                                                   |                    |            |                        |                                                              | Relative methylation (Cy5/Cy3) | Cy3 signal (Input) | Cy5 signal (MeDIP) | Relative methylation (Cy5/Cy3) | Cy3 signal (Input) | Cy5 signal (MeDIP) |
| A_68_P32142001 | chr19:46150433-46150477                           | NM_001039351:102   | Nolc1      | INSIDE                 | 0.229                                                        | 9.099                          | 2359.33            | 21467.81           | 2.086                          | 1959.06            | 4086.94            |
| A_68_P23567513 | chr5:29761841-29761885                            | NM_001033457:656   | Nom1       | INSIDE                 | 0.617                                                        | 0.445                          | 1702.54            | 756.86             | 0.274                          | 1418.49            | 388.89             |
| A_68_P23567510 | chr5:29761543-29761587                            | NM_001033457:358   | Nom1       | INSIDE                 | 0.535                                                        | 0.633                          | 3091.56            | 1957.96            | 0.339                          | 2338.98            | 793.05             |
| A_68_P21628851 | chr2:130099810-130099854                          | NM_024193:-315     | Nop56      | PROMOTER               | 0.208                                                        | 1.354                          | 1658.74            | 2246.48            | 0.281                          | 1363.95            | 383.63             |
| A_68_P21079204 | chr2:26358051-26358095                            | NM_008714:1270     | Notch1     | INSIDE                 | 0.591                                                        | 0.578                          | 1752.28            | 1013.57            | 0.342                          | 1392.33            | 475.75             |
| A_68_P22357701 | chr3:97817894-97817938                            | NM_010928:456      | Notch2     | INSIDE                 | 0.512                                                        | 0.147                          | 3414.87            | 500.48             | 0.075                          | 2299.13            | 172.60             |
| A_68_P24990655 | chr7:19548437-19548481                            | NM_001029877:37222 | Nova2      | INSIDE                 | 0.438                                                        | 0.524                          | 953.74             | 499.86             | 0.229                          | 786.70             | 180.45             |
| A_68_P25297066 | chr7:94395079-94395123                            | NM_015760:-204     | Nox4       | PROMOTER               | 0.27                                                         | 12.651                         | 1904.13            | 24088.97           | 3.411                          | 1525.24            | 5201.92            |
| A_68_P25297065 | chr7:94394966-94395010                            | NM_015760:-316     | Nox4       | PROMOTER               | 0.271                                                        | 0.556                          | 1506.57            | 838.00             | 0.15                           | 1146.30            | 172.50             |
| A_68_P25297067 | chr7:94395194-94395238                            | NM_015760:-88      | Nox4       | PROMOTER               | 0.436                                                        | 0.681                          | 4495.76            | 3063.01            | 0.297                          | 3325.58            | 987.11             |
| A_68_P25297068 | chr7:94395278-94395322                            | NM_015760:-4       | Nox4       | PROMOTER               | 0.265                                                        | 5.878                          | 1999.15            | 11751.30           | 1.556                          | 1782.30            | 2773.71            |
| A_68_P31099061 | chr17:24833259-24833303                           | NM_027988:102      | Noxo1      | INSIDE                 | 0.504                                                        | 2.761                          | 3800.91            | 10492.99           | 1.39                           | 3165.23            | 4401.17            |
| A_68_P24981712 | chr7:17061914-17061958                            | NM_008718:193      | Npas1      | INSIDE                 | 0.58                                                         | 0.475                          | 2904.27            | 1379.89            | 0.275                          | 2024.98            | 557.78             |
| A_68_P28445674 | chr12:55169509-55169553                           | NM_013780:819867   | Npas3      | INSIDE                 | 0.597                                                        | 5.206                          | 1462.92            | 7615.34            | 3.108                          | 1339.74            | 4164.27            |
| A_68_P31926197 | chr19:4990111-4990155                             | NM_153553:-161     | Npas4      | PROMOTER               | 0.353                                                        | 6.474                          | 1222.90            | 7916.65            | 2.287                          | 977.54             | 2235.59            |
| A_68_P28185591 | chr11:120470102-120470146                         | NM_153288:334      | Npb        | INSIDE                 | 0.355                                                        | 5.410                          | 3205.24            | 17338.84           | 1.92                           | 2612.05            | 5015.17            |
| A_68_P28185588 | chr11:120469756-120469808                         | NM_153288:-8       | Npb        | PROMOTER               | 0.623                                                        | 0.177                          | 2687.01            | 474.46             | 0.11                           | 1881.60            | 207.09             |
| A_68_P20010817 | chr1:5907429-5907473                              | NM_010342:29       | Npbwr1     | INSIDE                 | 0.492                                                        | 0.258                          | 1725.05            | 444.78             | 0.127                          | 1354.24            | 171.74             |
| A_68_P31499629 | chr18:12395086-12395130                           | NM_008720:-213     | Npc1       | PROMOTER               | 0.238                                                        | 21.550                         | 3402.20            | 73318.83           | 5.13                           | 3023.15            | 15508.87           |
| A_68_P28600138 | chr12:86114028-86114072                           | NM_023409:12       | Npc2       | INSIDE                 | 0.46                                                         | 0.237                          | 2161.95            | 513.04             | 0.109                          | 1571.66            | 171.67             |
| A_68_P30368805 | chr15:79659228-79659272                           | NM_001013360:5513  | Npcd       | INSIDE                 | 0.593                                                        | 5.782                          | 1236.96            | 7151.81            | 3.431                          | 1111.20            | 3812.75            |
| A_68_P30368843 | chr15:79664263-79664307                           | NM_001013360:479   | Npcd       | INSIDE                 | 0.544                                                        | 1.363                          | 6481.54            | 8833.00            | 0.741                          | 4357.32            | 3229.42            |
| A_68_P21071913 | chr2:25258906-25258950                            | NM_008721:326      | Npdc1      | INSIDE                 | 0.139                                                        | 17.554                         | 2181.10            | 38286.51           | 2.437                          | 1847.93            | 4503.43            |
| A_68_P21071911 | chr2:25258679-25258723                            | NM_008721:98       | Npdc1      | INSIDE                 | 0.359                                                        | 0.514                          | 1545.55            | 794.64             | 0.185                          | 1205.80            | 222.51             |
| A_68_P21071909 | chr2:25258527-25258571                            | NM_008721:-54      | Npdc1      | PROMOTER               | 0.291                                                        | 2.333                          | 4875.49            | 11374.09           | 0.678                          | 3855.83            | 2613.25            |
| A_68_P21873559 | chr2:173946554-173946598                          | NM_213733:10725    | Npepl1     | INSIDE                 | 0.35                                                         | 5.104                          | 1348.35            | 6881.92            | 1.788                          | 1033.29            | 1847.79            |
| A_68_P27181450 | chr10:61088648-61088692                           | NM_001177511:30439 | Npffr1     | INSIDE                 | 0.404                                                        | 0.518                          | 1924.51            | 996.82             | 0.209                          | 1457.03            | 305.01             |
| A_68_P26789122 | chr9:103904643-103904687                          | NM_172460:-209     | Nphp3      | PROMOTER               | 0.55                                                         | 0.288                          | 4715.33            | 1358.72            | 0.158                          | 3399.71            | 538.68             |
| A_68_P26789125 | chr9:103905125-103905169                          | NM_172460:273      | Nphp3      | INSIDE                 | 0.613                                                        | 0.595                          | 2100.16            | 1250.59            | 0.365                          | 1586.19            | 579.41             |
| A_68_P26789124 | chr9:103904969-103905013                          | NM_172460:117      | Nphp3      | INSIDE                 | 0.33                                                         | 1.976                          | 5669.05            | 11204.36           | 0.652                          | 3896.97            | 2539.81            |
| A_68_P26789123 | chr9:103904786-103904830                          | NM_172460:-65      | Nphp3      | PROMOTER               | 0.472                                                        | 1.416                          | 9209.55            | 13036.32           | 0.668                          | 5971.48            | 3990.32            |
| A_68_P25031675 | chr7:31250465-31250509                            | NR_004443:124      | Nphs1as    | INSIDE                 | 0.533                                                        | 0.366                          | 2168.92            | 793.02             | 0.195                          | 1630.11            | 317.58             |
| A_68_P28184543 | chr11:120298753-120298797                         | NM_001195023:240   | Nploc4     | INSIDE                 | 0.431                                                        | 4.035                          | 12173.16           | 49118.74           | 1.738                          | 9211.39            | 16011.99           |
| A_68_P22325410 | chr3:90270013-90270057                            | NM_008727:-246     | Npr1       | PROMOTER               | 0.439                                                        | 4.875                          | 1593.01            | 7765.51            | 2.142                          | 1249.12            | 2676.11            |
| A_68_P22872800 | chr4:43644731-43644775                            | NM_173788:-54      | Npr2       | PROMOTER               | 0.354                                                        | 0.608                          | 4537.89            | 2759.18            | 0.215                          | 2628.48            | 565.31             |
| A_68_P22872799 | chr4:43644616-43644660                            | NM_173788:-168     | Npr2       | PROMOTER               | 0.306                                                        | 1.510                          | 3989.89            | 6023.00            | 0.461                          | 2694.36            | 1243.33            |
| A_68_P30018903 | chr15:11836061-11836105                           | NM_001039181:-653  | Npr3       | PROMOTER               | 0.661                                                        | 0.473                          | 1950.79            | 922.98             | 0.313                          | 1573.85            | 491.98             |
| A_68_P30018904 | chr15:11836154-11836198                           | NM_001039181:-747  | Npr3       | PROMOTER               | 0.304                                                        | 5.758                          | 1783.79            | 10271.45           | 1.748                          | 1611.43            | 2817.16            |
| A_68_P26548747 | chr9:58430661-58430705                            | NM_009145:636      | Nptn       | INSIDE                 | 0.499                                                        | 0.367                          | 1284.33            | 470.83             | 0.183                          | 1002.96            | 183.65             |
| A_68_P28178599 | chr11:119410964-119411008                         | NM_008730:-1852    | Nptx1      | PROMOTER               | 0.326                                                        | 5.934                          | 1720.80            | 10211.95           | 1.934                          | 1380.81            | 2670.43            |
| A_68_P28178578 | chr11:119408323-119408368                         | NM_008730:789      | Nptx1      | INSIDE                 | 0.596                                                        | 0.322                          | 3494.07            | 1126.50            | 0.192                          | 2456.94            | 472.42             |
| A_68_P28178598 | chr11:119410881-119410925                         | NM_008730:-1768    | Nptx1      | PROMOTER               | 0.609                                                        | 0.606                          | 1432.17            | 867.71             | 0.369                          | 1383.18            | 510.55             |
| A_68_P24434512 | chr6:49772812-49772856                            | NM_023456:107      | Npy        | INSIDE                 | 0.426                                                        | 4.931                          | 3294.21            | 16244.79           | 2.099                          | 2427.74            | 5096.37            |
| A_68_P24434511 | chr6:49772705-49772749                            | NM_023456:-1       | Npy        | PROMOTER               | 0.533                                                        | 0.736                          | 2189.44            | 1610.63            | 0.392                          | 1559.49            | 611.85             |
| A_68_P24434508 | chr6:49772350-49772395                            | NM_023456:-355     | Npy        | PROMOTER               | 0.576                                                        | 4.067                          | 462.84             | 1882.26            | 2.342                          | 405.06             | 948.81             |
| A_68_P24434509 | chr6:49772474-49772518                            | NM_023456:-231     | Npy        | PROMOTER               | 0.236                                                        | 1.526                          | 804.45             | 1227.73            | 0.36                           | 628.74             | 226.11             |

| ProbeName      | Target position of probe on CpG island microarray | TargetID            | GeneSymbol | CpG island Description | Ratio of relative methylation (TiO <sub>2</sub> -NP/Vehicle) | Sham group                     |                    |                    | TiO <sub>2</sub> -H group      |                    |                    |
|----------------|---------------------------------------------------|---------------------|------------|------------------------|--------------------------------------------------------------|--------------------------------|--------------------|--------------------|--------------------------------|--------------------|--------------------|
|                |                                                   |                     |            |                        |                                                              | Relative methylation (Cy5/Cy3) | Cy3 signal (Input) | Cy5 signal (MeDIP) | Relative methylation (Cy5/Cy3) | Cy3 signal (Input) | Cy5 signal (MeDIP) |
| A_68_P29437678 | chr14:19071659-19071703                           | NM_011584:-60       | Nr1d2      | PROMOTER               | 0.309                                                        | 1.708                          | 5735.36            | 9794.93            | 0.528                          | 4165.97            | 2197.81            |
| A_68_P29437679 | chr14:19071747-19071791                           | NM_011584:-148      | Nr1d2      | PROMOTER               | 0.338                                                        | 0.595                          | 1326.13            | 788.41             | 0.201                          | 885.80             | 177.75             |
| A_68_P25088125 | chr7:51807692-51807736                            | NM_009473:1579      | Nr1h2      | INSIDE                 | 0.06                                                         | 45.256                         | 6124.76            | 277181.50          | 2.728                          | 5354.14            | 14605.14           |
| A_68_P25088126 | chr7:51807778-51807822                            | NM_009473:1493      | Nr1h2      | INSIDE                 | 0.082                                                        | 48.836                         | 5011.53            | 244744.90          | 4.008                          | 4299.09            | 17230.36           |
| A_68_P25088136 | chr7:51808933-51808977                            | NM_009473:339       | Nr1h2      | INSIDE                 | 0.229                                                        | 22.535                         | 10921.18           | 246112.50          | 5.153                          | 10635.21           | 54802.82           |
| A_68_P27357767 | chr10:93610648-93610692                           | NM_011629:-5        | Nr2c1      | PROMOTER               | 0.618                                                        | 4.891                          | 3680.06            | 17999.77           | 3.021                          | 3083.36            | 9314.46            |
| A_68_P24643143 | chr6:92042164-92042208                            | NM_011630:775       | Nr2c2      | INSIDE                 | 0.499                                                        | 4.082                          | 1422.51            | 5807.19            | 2.038                          | 1104.82            | 2251.52            |
| A_68_P27095712 | chr10:42303728-42303772                           | NM_152229:-356      | Nr2e1      | PROMOTER               | 0.255                                                        | 62.638                         | 8325.78            | 521511.30          | 15.997                         | 8379.40            | 134048.60          |
| A_68_P27095676 | chr10:42299357-42299401                           | NM_152229:4016      | Nr2e1      | INSIDE                 | 0.292                                                        | 13.823                         | 3183.87            | 44011.44           | 4.035                          | 2999.90            | 12105.90           |
| A_68_P27095770 | chr10:42311388-42311432                           | NM_152229:-8016     | Nr2e1      | PROMOTER               | 0.428                                                        | 0.414                          | 1661.77            | 687.90             | 0.177                          | 1265.41            | 224.02             |
| A_68_P27095710 | chr10:42303461-42303505                           | NM_152229:-88       | Nr2e1      | PROMOTER               | 0.546                                                        | 0.548                          | 1911.84            | 1048.26            | 0.299                          | 1435.69            | 429.90             |
| A_68_P27095769 | chr10:42311289-42311333                           | NM_152229:-7916     | Nr2e1      | PROMOTER               | 0.569                                                        | 3.072                          | 753.72             | 2315.49            | 1.749                          | 593.55             | 1038.14            |
| A_68_P29162267 | chr13:78334860-78334904                           | NM_010151:3361      | Nr2f1      | INSIDE                 | 0.221                                                        | 0.389                          | 6558.08            | 2552.63            | 0.086                          | 4038.21            | 347.14             |
| A_68_P25210716 | chr7:77496064-77496108                            | NM_009697:9393      | Nr2f2      | DOWNSTREAM             | 0.363                                                        | 3.716                          | 3606.36            | 13400.93           | 1.35                           | 3075.23            | 4152.40            |
| A_68_P25956629 | chr8:73904896-73904940                            | NM_010150:933       | Nr2f6      | INSIDE                 | 0.478                                                        | 0.200                          | 2556.06            | 510.33             | 0.095                          | 1801.77            | 171.79             |
| A_68_P25956630 | chr8:73905073-73905117                            | NM_010150:757       | Nr2f6      | INSIDE                 | 0.3                                                          | 0.633                          | 1129.83            | 714.65             | 0.189                          | 913.03             | 172.97             |
| A_68_P31640479 | chr18:39649428-39649472                           | NM_008173:-2551     | Nr3c1      | PROMOTER               | 0.515                                                        | 0.621                          | 705.28             | 437.83             | 0.32                           | 532.99             | 170.55             |
| A_68_P25979817 | chr8:79425933-79425977                            | NM_001083906:-452   | Nr3c2      | DIVERGENT_PROMOTER     | 0.592                                                        | 0.604                          | 932.10             | 562.94             | 0.357                          | 798.88             | 285.56             |
| A_68_P25981540 | chr8:79709769-79709813                            | NM_001083906:283384 | Nr3c2      | INSIDE                 | 0.109                                                        | 20.110                         | 639.26             | 12855.60           | 2.185                          | 427.93             | 934.94             |
| A_68_P21240085 | chr2:56976720-56976764                            | NM_001139509:-328   | Nr4a2      | PROMOTER               | 0.599                                                        | 3.716                          | 1222.46            | 4543.02            | 2.226                          | 1147.64            | 2554.09            |
| A_68_P21240022 | chr2:56969332-56969376                            | NM_013613:-1905     | Nr4a2      | PROMOTER               | 0.646                                                        | 3.098                          | 1519.54            | 4708.16            | 2.002                          | 1291.94            | 2586.20            |
| A_68_P22898222 | chr4:48064747-48064791                            | NM_015743:649       | Nr4a3      | INSIDE                 | 0.338                                                        | 5.198                          | 2920.07            | 15179.05           | 1.757                          | 2302.71            | 4046.67            |
| A_68_P22898162 | chr4:48057954-48057998                            | NM_015743:-6143     | Nr4a3      | PROMOTER               | 0.648                                                        | 0.237                          | 2002.91            | 473.77             | 0.153                          | 1487.38            | 227.84             |
| A_68_P21149827 | chr2:38544490-38544534                            | NM_139051:25550     | Nr5a1      | DOWNSTREAM             | 0.548                                                        | 7.045                          | 1813.04            | 12772.41           | 3.859                          | 1685.38            | 6504.55            |
| A_68_P21150017 | chr2:38567253-38567297                            | NM_139051:2788      | Nr5a1      | INSIDE                 | 0.56                                                         | 4.863                          | 2076.42            | 10097.60           | 2.721                          | 1697.95            | 4620.07            |
| A_68_P21151183 | chr2:38781338-38781382                            | NM_010264:621       | Nr6a1      | INSIDE                 | 0.663                                                        | 0.528                          | 2382.09            | 1256.91            | 0.35                           | 1833.88            | 641.37             |
| A_68_P21151181 | chr2:38781046-38781090                            | NM_010264:913       | Nr6a1      | INSIDE                 | 0.432                                                        | 1.521                          | 2427.00            | 3692.42            | 0.657                          | 1989.57            | 1307.05            |
| A_68_P21070358 | chr2:25036517-25036561                            | NM_025980:261       | Nrarp      | INSIDE                 | 0.506                                                        | 4.466                          | 897.58             | 4008.82            | 2.261                          | 796.83             | 1801.97            |
| A_68_P27211071 | chr10:66748168-66748213                           | NM_001036293:-161   | Nrbf2      | PROMOTER               | 0.475                                                        | 0.529                          | 1658.00            | 877.22             | 0.251                          | 1343.10            | 337.73             |
| A_68_P23577231 | chr5:31543485-31543529                            | NM_147201:216       | Nrbp1      | INSIDE                 | 0.498                                                        | 5.367                          | 1621.10            | 8700.73            | 2.674                          | 1273.16            | 3404.95            |
| A_68_P30346015 | chr15:75921006-75921050                           | NM_144847:-585      | Nrbp2      | PROMOTER               | 0.241                                                        | 8.705                          | 3058.82            | 26625.67           | 2.097                          | 2702.78            | 5667.30            |
| A_68_P30346013 | chr15:75920805-75920849                           | NM_144847:-383      | Nrbp2      | PROMOTER               | 0.277                                                        | 7.205                          | 2431.10            | 17515.78           | 1.998                          | 2105.37            | 4207.54            |
| A_68_P28397452 | chr12:45429719-45429763                           | NM_001146031:-131   | Nrcam      | PROMOTER               | 0.425                                                        | 5.271                          | 1107.69            | 5838.85            | 2.241                          | 972.97             | 2180.73            |
| A_68_P24329792 | chr6:29998675-29998719                            | NM_001164230:709    | Nrfl       | INSIDE                 | 0.444                                                        | 3.712                          | 1469.61            | 5455.56            | 1.649                          | 1245.59            | 2054.38            |
| A_68_P31621449 | chr18:36178281-36178325                           | NM_001167891:178512 | Nrg2       | INSIDE                 | 0.422                                                        | 4.343                          | 3842.15            | 16686.84           | 1.832                          | 2967.01            | 5435.91            |
| A_68_P31621446 | chr18:36177796-36177840                           | NM_001167891:178996 | Nrg2       | INSIDE                 | 0.441                                                        | 18.345                         | 1274.49            | 23380.37           | 8.095                          | 1182.84            | 9574.69            |
| A_68_P31622624 | chr18:36356271-36356315                           | NM_001167891:522    | Nrg2       | INSIDE                 | 0.49                                                         | 5.751                          | 2485.76            | 14294.83           | 2.818                          | 2050.19            | 5776.54            |
| A_68_P31621448 | chr18:36178193-36178239                           | NM_001167891:178598 | Nrg2       | INSIDE                 | 0.556                                                        | 12.103                         | 4804.38            | 58147.81           | 6.733                          | 4345.50            | 29256.46           |
| A_68_P31621829 | chr18:36227658-36227702                           | NM_001167891:129134 | Nrg2       | INSIDE                 | 0.599                                                        | 2.847                          | 961.69             | 2737.82            | 1.705                          | 755.32             | 1288.06            |
| A_68_P28950705 | chr13:36816445-36816489                           | NM_153529:9857      | Nrn1       | DOWNSTREAM             | 0.148                                                        | 40.311                         | 3981.54            | 160501.10          | 5.974                          | 3512.43            | 20982.29           |
| A_68_P28950790 | chr13:36827018-36827062                           | NM_153529:-717      | Nrn1       | PROMOTER               | 0.568                                                        | 2.527                          | 4822.60            | 12187.79           | 1.436                          | 3690.97            | 5300.89            |
| A_68_P20282811 | chr1:62749708-62749752                            | NM_001077406:-160   | Nrp2       | PROMOTER               | 0.303                                                        | 22.058                         | 3116.08            | 68733.06           | 6.673                          | 2738.95            | 18275.69           |
| A_68_P31438308 | chr17:90854876-90854920                           | NM_020252:637244    | Nrxn1      | INSIDE                 | 0.522                                                        | 0.673                          | 1789.80            | 1205.27            | 0.351                          | 1402.90            | 492.81             |
| A_68_P31935125 | chr19:6497430-6497474                             | NM_001205234:78715  | Nrxn2      | INSIDE                 | 0.52                                                         | 4.166                          | 1142.61            | 4759.61            | 2.167                          | 949.70             | 2057.76            |
| A_68_P31935415 | chr19:6532017-6532061                             | NM_001205234:113301 | Nrxn2      | INSIDE                 | 0.553                                                        | 0.258                          | 1928.09            | 498.12             | 0.143                          | 1354.18            | 193.37             |
| A_68_P31935410 | chr19:6531540-6531584                             | NM_001205234:112825 | Nrxn2      | INSIDE                 | 0.659                                                        | 0.577                          | 1907.46            | 1101.02            | 0.381                          | 1340.08            | 510.08             |



| ProbeName      | Target position of probe on CpG island microarray | TargetID           | GeneSymbol | CpG island Description | Ratio of relative methylation (TiO <sub>2</sub> -NP/Vehicle) | Sham group                     |                    |                    | TiO <sub>2</sub> -H group      |                    |                    |
|----------------|---------------------------------------------------|--------------------|------------|------------------------|--------------------------------------------------------------|--------------------------------|--------------------|--------------------|--------------------------------|--------------------|--------------------|
|                |                                                   |                    |            |                        |                                                              | Relative methylation (Cy5/Cy3) | Cy3 signal (Input) | Cy5 signal (MeDIP) | Relative methylation (Cy5/Cy3) | Cy3 signal (Input) | Cy5 signal (MeDIP) |
| A_68_P31934666 | chr19:6428995-6429039                             | NM_001205234:10279 | Nrxn2      | INSIDE                 | 0.33                                                         | 1.937                          | 4836.47            | 9367.25            | 0.64                           | 3239.76            | 2073.03            |
| A_68_P31935127 | chr19:6497654-6497698                             | NM_001205234:78939 | Nrxn2      | INSIDE                 | 0.263                                                        | 2.585                          | 2736.40            | 7072.29            | 0.681                          | 2172.33            | 1479.01            |
| A_68_P23617871 | chr5:38550739-38550783                            | NM_010942:-54      | Nsg1       | PROMOTER               | 0.329                                                        | 10.944                         | 4175.85            | 45700.36           | 3.598                          | 3548.73            | 12767.99           |
| A_68_P23617869 | chr5:38550496-38550540                            | NM_010942:188      | Nsg1       | INSIDE                 | 0.637                                                        | 0.710                          | 1987.09            | 1410.59            | 0.452                          | 1487.18            | 672.75             |
| A_68_P22705748 | chr4:6380821-6380865                              | NM_010945:576      | Nsmaf      | INSIDE                 | 0.42                                                         | 3.696                          | 1170.75            | 4327.39            | 1.554                          | 989.08             | 1536.67            |
| A_68_P25522280 | chr7:137690501-137690545                          | NM_001162855:373   | Nsmce4a    | INSIDE                 | 0.372                                                        | 0.380                          | 2317.15            | 880.71             | 0.141                          | 1698.29            | 239.90             |
| A_68_P25522281 | chr7:137690595-137690639                          | NM_001162855:279   | Nsmce4a    | INSIDE                 | 0.545                                                        | 0.389                          | 1169.31            | 454.95             | 0.212                          | 871.10             | 184.87             |
| A_68_P23227486 | chr4:115726398-115726442                          | NM_028142:61       | Nsun4      | INSIDE                 | 0.36                                                         | 0.195                          | 4148.25            | 808.00             | 0.07                           | 2701.00            | 189.29             |
| A_68_P23760679 | chr5:66651534-66651578                            | NM_027602:193      | Nsun7      | INSIDE                 | 0.131                                                        | 2.525                          | 2681.53            | 6770.13            | 0.331                          | 1761.27            | 583.73             |
| A_68_P23760677 | chr5:66651381-66651425                            | NM_027602:39       | Nsun7      | INSIDE                 | 0.496                                                        | 3.219                          | 1611.69            | 5188.34            | 1.596                          | 1310.00            | 2090.26            |
| A_68_P23760676 | chr5:66651307-66651351                            | NM_027602:-35      | Nsun7      | PROMOTER               | 0.648                                                        | 0.510                          | 905.12             | 461.50             | 0.33                           | 731.09             | 241.61             |
| A_68_P23760674 | chr5:66651117-66651161                            | NM_027602:-225     | Nsun7      | PROMOTER               | 0.622                                                        | 0.663                          | 874.08             | 579.66             | 0.413                          | 769.24             | 317.43             |
| A_68_P32147200 | chr19:47089737-47089781                           | NM_001164363:-79   | Nt5c2      | PROMOTER               | 0.567                                                        | 6.906                          | 767.42             | 5300.14            | 3.918                          | 634.82             | 2487.15            |
| A_68_P27056941 | chr10:34138297-34138341                           | NM_176968:16       | Nt5dc1     | INSIDE                 | 0.215                                                        | 0.566                          | 5092.58            | 2880.23            | 0.122                          | 3390.74            | 413.21             |
| A_68_P29509959 | chr14:31952078-31952122                           | NM_027289:4062     | Nt5dc2     | INSIDE                 | 0.321                                                        | 10.066                         | 4899.76            | 49319.37           | 3.235                          | 3283.42            | 10622.75           |
| A_68_P27315977 | chr10:86241971-86242015                           | NM_175331:243      | Nt5dc3     | INSIDE                 | 0.354                                                        | 24.494                         | 2104.38            | 51544.07           | 8.677                          | 1868.15            | 16209.37           |
| A_68_P30559120 | chr16:13819791-13819845                           | NM_010946:449      | Ntan1      | INSIDE                 | 0.298                                                        | 11.498                         | 720.52             | 8284.46            | 3.424                          | 568.52             | 1946.44            |
| A_68_P25092988 | chr7:52671206-52671250                            | NM_198190:2164     | Ntf5       | INSIDE                 | 0.404                                                        | 0.685                          | 2026.27            | 1388.51            | 0.277                          | 1357.91            | 376.12             |
| A_68_P25092986 | chr7:52670982-52671026                            | NM_198190:1940     | Ntf5       | INSIDE                 | 0.517                                                        | 4.733                          | 506.81             | 2398.72            | 2.446                          | 418.74             | 1024.37            |
| A_68_P25092990 | chr7:52671388-52671432                            | NM_198190:2346     | Ntf5       | INSIDE                 | 0.662                                                        | 2.842                          | 940.30             | 2672.18            | 1.882                          | 753.32             | 1417.53            |
| A_68_P25092987 | chr7:52671096-52671140                            | NM_198190:2054     | Ntf5       | INSIDE                 | 0.493                                                        | 1.388                          | 2877.89            | 3994.94            | 0.684                          | 2100.49            | 1436.64            |
| A_68_P31098618 | chr17:24769679-24769723                           | NM_008743:74       | Nthl1      | INSIDE                 | 0.167                                                        | 3.861                          | 1894.53            | 7315.67            | 0.645                          | 1554.24            | 1001.76            |
| A_68_P27887968 | chr11:68026330-68026374                           | NM_008744:173976   | Ntn1       | INSIDE                 | 0.224                                                        | 29.224                         | 4129.55            | 120683.70          | 6.555                          | 4151.68            | 27215.64           |
| A_68_P27889095 | chr11:68200015-68200060                           | NM_008744:291      | Ntn1       | INSIDE                 | 0.386                                                        | 0.482                          | 1272.93            | 614.17             | 0.186                          | 917.14             | 170.95             |
| A_68_P27889094 | chr11:68199927-68199971                           | NM_008744:380      | Ntn1       | INSIDE                 | 0.442                                                        | 0.650                          | 3640.90            | 2366.21            | 0.287                          | 2795.25            | 802.49             |
| A_68_P25094516 | chr7:52949587-52949631                            | NM_001033356:9825  | Ntn5       | INSIDE                 | 0.291                                                        | 22.910                         | 3440.59            | 78824.36           | 6.658                          | 2200.81            | 14653.29           |
| A_68_P22422573 | chr3:109946012-109946056                          | NM_001163348:356   | Ntng1      | INSIDE                 | 0.6                                                          | 0.548                          | 1361.28            | 746.44             | 0.329                          | 1095.19            | 360.57             |
| A_68_P22422570 | chr3:109945667-109945711                          | NM_001163348:702   | Ntng1      | INSIDE                 | 0.092                                                        | 16.948                         | 2123.04            | 35980.28           | 1.563                          | 1821.54            | 2846.42            |
| A_68_P21095673 | chr2:29050527-29050571                            | NM_133500:53012    | Ntng2      | INSIDE                 | 0.251                                                        | 0.393                          | 2535.37            | 997.28             | 0.099                          | 1817.28            | 179.27             |
| A_68_P26253528 | chr8:128258194-128258238                          | NM_025636:114      | Ntper      | INSIDE                 | 0.374                                                        | 8.234                          | 4091.79            | 33690.40           | 3.082                          | 3218.72            | 9920.73            |
| A_68_P26253526 | chr8:128258037-128258081                          | NM_025636:-44      | Ntper      | PROMOTER               | 0.232                                                        | 6.836                          | 1908.56            | 13047.68           | 1.586                          | 1625.68            | 2578.00            |
| A_68_P22310062 | chr3:87599138-87599182                            | NM_001033124:-76   | Ntrk1      | DIVERGENT_PROMOTER     | 0.421                                                        | 11.026                         | 1007.03            | 11103.28           | 4.642                          | 762.42             | 3539.47            |
| A_68_P22310063 | chr3:87599240-87599284                            | NM_001033124:-178  | Ntrk1      | DIVERGENT_PROMOTER     | 0.287                                                        | 0.600                          | 2295.65            | 1376.87            | 0.172                          | 1624.96            | 279.34             |
| A_68_P29075362 | chr13:58909694-58909740                           | NM_001025074:523   | Ntrk2      | INSIDE                 | 0.352                                                        | 7.359                          | 647.17             | 4762.47            | 2.593                          | 506.67             | 1313.64            |
| A_68_P29075346 | chr13:58907905-58907950                           | NM_008745:-29      | Ntrk2      | PROMOTER               | 0.467                                                        | 0.243                          | 2056.18            | 500.24             | 0.114                          | 1516.35            | 172.35             |
| A_68_P29075348 | chr13:58908057-58908101                           | NM_001025074:-1115 | Ntrk2      | PROMOTER               | 0.498                                                        | 0.141                          | 4100.58            | 577.28             | 0.07                           | 2446.10            | 171.33             |
| A_68_P29075350 | chr13:58908196-58908240                           | NM_001025074:-975  | Ntrk2      | PROMOTER               | 0.635                                                        | 26.662                         | 8517.08            | 227082.40          | 16.937                         | 7482.81            | 126733.00          |
| A_68_P23543337 | chr5:24191628-24191672                            | NM_016736:18       | Nub1       | INSIDE                 | 0.463                                                        | 0.287                          | 4834.89            | 1388.88            | 0.133                          | 2959.02            | 393.70             |
| A_68_P30542115 | chr16:10411996-10412040                           | NM_011955:-12      | Nubp1      | PROMOTER               | 0.335                                                        | 0.564                          | 1090.10            | 615.31             | 0.189                          | 908.91             | 171.68             |
| A_68_P28433223 | chr12:53198848-53198892                           | NM_029760:138      | Nubp1      | INSIDE                 | 0.52                                                         | 3.447                          | 2020.88            | 6966.46            | 1.794                          | 1650.30            | 2960.76            |
| A_68_P25093531 | chr7:52765530-52765574                            | NM_001163662:226   | Nucb1      | INSIDE                 | 0.467                                                        | 0.519                          | 2890.71            | 1498.92            | 0.242                          | 2137.16            | 517.47             |
| A_68_P23318161 | chr4:133101757-133101801                          | NM_010948:164      | Nudc       | INSIDE                 | 0.571                                                        | 10.450                         | 3080.14            | 32186.97           | 5.965                          | 2673.64            | 15947.66           |
| A_68_P27567294 | chr11:6099870-6099914                             | NM_173748:562      | Nudcd3     | INSIDE                 | 0.262                                                        | 2.000                          | 2225.27            | 4451.02            | 0.523                          | 1785.58            | 934.43             |
| A_68_P26795688 | chr9:105033875-105033919                          | NM_029385:239      | Nudt16     | INSIDE                 | 0.012                                                        | 203.975                        | 576.83             | 117659.00          | 2.399                          | 426.44             | 1022.96            |
| A_68_P25049946 | chr7:36340772-36340816                            | NM_033080:153      | Nudt19     | INSIDE                 | 0.595                                                        | 5.475                          | 2268.58            | 12419.67           | 3.257                          | 1917.20            | 6244.42            |
| A_68_P31117527 | chr17:27760515-27760559                           | NM_019837:-139     | Nudt3      | PROMOTER               | 0.642                                                        | 2.678                          | 704.83             | 1887.89            | 1.719                          | 661.19             | 1136.69            |

| ProbeName      | Target position of probe on CpG island microarray | TargetID            | GeneSymbol | CpG island Description | Ratio of relative methylation (TiO <sub>2</sub> -NP/Vehicle) | Sham group                     |                    |                    | TiO <sub>2</sub> -H group      |                    |                    |
|----------------|---------------------------------------------------|---------------------|------------|------------------------|--------------------------------------------------------------|--------------------------------|--------------------|--------------------|--------------------------------|--------------------|--------------------|
|                |                                                   |                     |            |                        |                                                              | Relative methylation (Cy5/Cy3) | Cy3 signal (Input) | Cy5 signal (MeDIP) | Relative methylation (Cy5/Cy3) | Cy3 signal (Input) | Cy5 signal (MeDIP) |
| A_68_P22063510 | chr3:37318580-37318625                            | NM_153561:-90       | Nudt6      | DIVERGENT_PROMOTER     | 0.635                                                        | 2.286                          | 6968.69            | 15929.59           | 1.453                          | 4674.85            | 6790.54            |
| A_68_P23950024 | chr5:104475955-104475999                          | NM_028794:-53       | Nudt9      | PROMOTER               | 0.608                                                        | 3.501                          | 890.14             | 3116.24            | 2.128                          | 753.08             | 1602.68            |
| A_68_P27938848 | chr11:77500486-77500530                           | NM_001024205:868    | Nufip2     | INSIDE                 | 0.344                                                        | 4.464                          | 2147.89            | 9588.86            | 1.535                          | 1796.34            | 2757.21            |
| A_68_P27483044 | chr10:117229909-117229953                         | NM_134010:-169      | Nup107     | PROMOTER               | 0.295                                                        | 7.828                          | 5192.53            | 40648.95           | 2.307                          | 3845.52            | 8869.74            |
| A_68_P29009458 | chr13:46822289-46822335                           | NM_175749:906       | Nup153     | INSIDE                 | 0.226                                                        | 7.408                          | 2218.41            | 16432.93           | 1.675                          | 1729.67            | 2896.42            |
| A_68_P29009460 | chr13:46822473-46822517                           | NM_175749:724       | Nup153     | INSIDE                 | 0.4                                                          | 3.832                          | 3956.24            | 15161.45           | 1.533                          | 3021.28            | 4630.77            |
| A_68_P29009466 | chr13:46823130-46823174                           | NM_175749:66        | Nup153     | INSIDE                 | 0.594                                                        | 2.711                          | 1851.45            | 5019.40            | 1.611                          | 1473.74            | 2374.03            |
| A_68_P29998115 | chr15:8059531-8059575                             | NM_133227:240       | Nup155     | INSIDE                 | 0.598                                                        | 0.285                          | 2330.93            | 665.33             | 0.171                          | 1626.47            | 277.41             |
| A_68_P21418380 | chr2:90519239-90519283                            | NM_021512:1889      | Nup160     | INSIDE                 | 0.332                                                        | 18.086                         | 6782.75            | 122670.20          | 6.006                          | 5940.62            | 35682.06           |
| A_68_P21418382 | chr2:90519554-90519598                            | NM_021512:2205      | Nup160     | INSIDE                 | 0.361                                                        | 16.604                         | 6101.25            | 101305.10          | 5.991                          | 6189.93            | 37086.19           |
| A_68_P24360134 | chr6:35127844-35127888                            | NM_027513:251       | Nup205     | INSIDE                 | 0.61                                                         | 4.052                          | 1340.92            | 5433.28            | 2.473                          | 1078.18            | 2665.95            |
| A_68_P24360135 | chr6:35127937-35127981                            | NM_027513:343       | Nup205     | INSIDE                 | 0.644                                                        | 0.395                          | 1167.59            | 460.62             | 0.254                          | 918.89             | 233.45             |
| A_68_P24636902 | chr6:91066754-91066798                            | NM_018815:44        | Nup210     | INSIDE                 | 0.438                                                        | 9.384                          | 1083.64            | 10169.05           | 4.111                          | 885.74             | 3641.48            |
| A_68_P23894271 | chr5:92863563-92863607                            | NM_183392:641       | Nup54      | INSIDE                 | 0.478                                                        | 5.751                          | 2516.69            | 14472.77           | 2.752                          | 2170.98            | 5973.89            |
| A_68_P32697224 | chrX:136596652-136596696                          | NM_001081668:433    | Nup62cl    | INSIDE                 | 0.555                                                        | 4.242                          | 2006.00            | 8510.10            | 2.352                          | 2644.37            | 6220.86            |
| A_68_P26076074 | chr8:96738369-96738413                            | NM_172410:-110      | Nup93      | PROMOTER               | 0.339                                                        | 0.587                          | 1135.20            | 666.86             | 0.199                          | 911.68             | 181.42             |
| A_68_P27931783 | chr11:76212254-76212298                           | NM_008750:367       | Nxn        | INSIDE                 | 0.475                                                        | 4.066                          | 961.47             | 3909.63            | 1.93                           | 809.69             | 1562.75            |
| A_68_P29031120 | chr13:51266739-51266783                           | NM_029173:367       | Nxnl2      | INSIDE                 | 0.385                                                        | 8.118                          | 2552.68            | 20723.69           | 3.124                          | 2146.50            | 6705.41            |
| A_68_P28039255 | chr11:95375266-95375310                           | NM_130858:591       | Nxph3      | INSIDE                 | 0.216                                                        | 25.981                         | 6314.19            | 164045.80          | 5.62                           | 5878.50            | 33037.56           |
| A_68_P28039256 | chr11:95375387-95375431                           | NM_130858:471       | Nxph3      | INSIDE                 | 0.452                                                        | 0.587                          | 8493.79            | 4984.50            | 0.265                          | 5854.98            | 1551.89            |
| A_68_P28039252 | chr11:95374960-95375004                           | NM_130858:897       | Nxph3      | INSIDE                 | 0.632                                                        | 5.451                          | 3174.08            | 17302.23           | 3.443                          | 2361.14            | 8129.37            |
| A_68_P27536454 | chr10:126971360-126971404                         | NM_183297:233       | Nxph4      | INSIDE                 | 0.171                                                        | 2.398                          | 2023.28            | 4852.81            | 0.411                          | 1414.25            | 581.01             |
| A_68_P26460524 | chr9:43048046-43048090                            | NM_178644:-169      | Oaf        | PROMOTER               | 0.504                                                        | 0.197                          | 2592.80            | 510.80             | 0.099                          | 1977.12            | 196.26             |
| A_68_P26588950 | chr9:65524268-65524312                            | NM_010952:-64       | Oaz2-ps    | PROMOTER               | 0.513                                                        | 0.644                          | 1034.04            | 666.15             | 0.33                           | 828.51             | 273.74             |
| A_68_P27835027 | chr11:58949650-58949694                           | NM_001171512:205    | Obscn      | INSIDE                 | 0.272                                                        | 0.520                          | 1460.24            | 759.87             | 0.141                          | 1196.70            | 169.32             |
| A_68_P27835010 | chr11:58947926-58947970                           | NM_001171512:1929   | Obscn      | INSIDE                 | 0.38                                                         | 10.105                         | 1866.07            | 18855.90           | 3.836                          | 1561.03            | 5987.57            |
| A_68_P20354543 | chr1:75501853-75501897                            | NM_178884:1153      | Obsl1      | INSIDE                 | 0.464                                                        | 0.501                          | 1489.61            | 746.05             | 0.232                          | 1075.69            | 249.78             |
| A_68_P20354552 | chr1:75502961-75503005                            | NM_178884:45        | Obsl1      | INSIDE                 | 0.578                                                        | 0.466                          | 1605.97            | 747.87             | 0.269                          | 1165.75            | 313.76             |
| A_68_P20354547 | chr1:75502266-75502310                            | NM_178884:739       | Obsl1      | INSIDE                 | 0.537                                                        | 0.583                          | 1351.84            | 788.21             | 0.313                          | 1038.20            | 325.15             |
| A_68_P29269015 | chr13:101322806-101322850                         | NM_008756:-375      | Oeln       | PROMOTER               | 0.407                                                        | 0.577                          | 2297.39            | 1325.03            | 0.235                          | 1472.76            | 345.37             |
| A_68_P29269014 | chr13:101322735-101322779                         | NM_008756:-303      | Oeln       | PROMOTER               | 0.562                                                        | 0.399                          | 5134.24            | 2048.17            | 0.224                          | 3359.35            | 752.93             |
| A_68_P29269012 | chr13:101322550-101322594                         | NM_008756:-119      | Oeln       | PROMOTER               | 0.324                                                        | 4.535                          | 896.75             | 4067.00            | 1.471                          | 1110.84            | 1633.54            |
| A_68_P28271091 | chr12:17551967-17552011                           | NM_013614:310       | Odc1       | INSIDE                 | 0.348                                                        | 6.048                          | 2852.57            | 17251.29           | 2.106                          | 2346.28            | 4941.16            |
| A_68_P28271087 | chr12:17551396-17551440                           | NM_013614:-260      | Odc1       | PROMOTER               | 0.646                                                        | 0.497                          | 1751.27            | 870.06             | 0.321                          | 1203.10            | 386.08             |
| A_68_P22606649 | chr3:144781741-144781785                          | NM_025714:199       | Odf2l      | INSIDE                 | 0.285                                                        | 14.518                         | 4727.28            | 68630.81           | 4.142                          | 3794.73            | 15719.34           |
| A_68_P27710860 | chr11:35952997-35953056                           | NM_011856:804719    | Odz2       | INSIDE                 | 0.346                                                        | 0.484                          | 2429.40            | 1175.52            | 0.167                          | 1562.01            | 261.42             |
| A_68_P27710218 | chr11:35860780-35860826                           | NM_011856:896943    | Odz2       | INSIDE                 | 0.315                                                        | 4.937                          | 1923.99            | 9497.90            | 1.553                          | 1299.69            | 2018.82            |
| A_68_P25848475 | chr8:49640835-49640879                            | NM_001145937:119188 | Odz3       | INSIDE                 | 0.369                                                        | 0.581                          | 1916.22            | 1112.69            | 0.214                          | 1487.56            | 318.56             |
| A_68_P25848476 | chr8:49641034-49641078                            | NM_001145937:118988 | Odz3       | INSIDE                 | 0.457                                                        | 0.549                          | 4165.93            | 2285.66            | 0.251                          | 2781.98            | 697.24             |
| A_68_P25343512 | chr7:103359060-103359104                          | NM_011858:-64       | Odz4       | PROMOTER               | 0.397                                                        | 38.101                         | 2285.45            | 87077.32           | 15.127                         | 2165.61            | 32758.66           |
| A_68_P27567701 | chr11:6191334-6191378                             | NM_010956:-243      | Ogdh       | PROMOTER               | 0.478                                                        | 0.735                          | 2173.78            | 1597.99            | 0.352                          | 1542.47            | 542.49             |
| A_68_P29516971 | chr14:33135063-33135107                           | NM_001081130:-120   | Ogdhl      | PROMOTER               | 0.659                                                        | 0.624                          | 1007.18            | 628.21             | 0.411                          | 913.51             | 375.43             |
| A_68_P21904884 | chr2:180324017-180324061                          | NM_031373:-73       | Ogfr       | PROMOTER               | 0.592                                                        | 2.863                          | 1045.20            | 2992.04            | 1.695                          | 992.83             | 1682.89            |
| A_68_P24758832 | chr6:113276968-113277012                          | NM_010957:21        | Ogg1       | INSIDE                 | 0.372                                                        | 10.029                         | 10699.42           | 107305.60          | 3.734                          | 8012.92            | 29921.16           |
| A_68_P21330227 | chr2:73052203-73052247                            | NM_025942:280       | Ola1       | INSIDE                 | 0.545                                                        | 0.582                          | 2866.94            | 1668.53            | 0.317                          | 2220.20            | 704.53             |
| A_68_P21089690 | chr2:28060930-28060989                            | NM_001038612:-249   | Olfml      | PROMOTER               | 0.359                                                        | 0.564                          | 1500.00            | 846.40             | 0.203                          | 1119.31            | 227.04             |

| ProbeName       | Target position of probe on CpG island microarray | TargetID           | GeneSymbol | CpG island Description | Ratio of relative methylation (TiO <sub>2</sub> -NP/Vehicle) | Sham group                     |                    |                    | TiO <sub>2</sub> -H group      |                    |                    |
|-----------------|---------------------------------------------------|--------------------|------------|------------------------|--------------------------------------------------------------|--------------------------------|--------------------|--------------------|--------------------------------|--------------------|--------------------|
|                 |                                                   |                    |            |                        |                                                              | Relative methylation (Cy5/Cy3) | Cy3 signal (Input) | Cy5 signal (MeDIP) | Relative methylation (Cy5/Cy3) | Cy3 signal (Input) | Cy5 signal (MeDIP) |
| A_68_P21089590  | chr2:28048879-28048923                            | NM_001038614:288   | Olfm1      | INSIDE                 | 0.235                                                        | 7.088                          | 1513.87            | 10730.84           | 1.663                          | 1290.91            | 2146.84            |
| A_68_P21089695  | chr2:28061711-28061755                            | NM_001038612:524   | Olfm1      | INSIDE                 | 0.622                                                        | 2.619                          | 1781.67            | 4665.33            | 1.63                           | 1436.98            | 2341.80            |
| A_68_P26343627  | chr9:20532217-20532261                            | NM_173777:420      | Olfm2      | INSIDE                 | 0.339                                                        | 8.213                          | 1862.67            | 15297.24           | 2.786                          | 1835.77            | 5114.73            |
| A_68_P26343622  | chr9:20531703-20531748                            | NM_173777:933      | Olfm2      | INSIDE                 | 0.621                                                        | 0.319                          | 3075.19            | 980.37             | 0.198                          | 2381.44            | 471.48             |
| A_68_P26343617  | chr9:20530951-20530995                            | NM_173777:1686     | Olfm2      | INSIDE                 | 0.433                                                        | 0.518                          | 1058.10            | 548.06             | 0.224                          | 783.61             | 175.55             |
| A_68_P27833087  | chr11:58660940-58660984                           | NM_146537:6345     | Olfir311   | DOWNSTREAM             | 0.421                                                        | 0.424                          | 1129.41            | 479.43             | 0.179                          | 965.28             | 172.54             |
| A_68_P30961698  | chr16:91227011-91227055                           | NM_016967:1238     | Olig2      | INSIDE                 | 0.375                                                        | 0.464                          | 1249.35            | 579.60             | 0.174                          | 1062.44            | 185.01             |
| A_68_P30961697  | chr16:91226847-91226891                           | NM_016967:1074     | Olig2      | INSIDE                 | 0.394                                                        | 6.542                          | 5567.01            | 36422.09           | 2.578                          | 4249.40            | 10954.07           |
| A_68_P30961642  | chr16:91220360-91220404                           | NM_016967:-5412    | Olig2      | PROMOTER               | 0.496                                                        | 0.283                          | 1587.40            | 449.33             | 0.14                           | 1246.74            | 175.07             |
| A_68_P30961686  | chr16:91225569-91225613                           | NM_016967:-204     | Olig2      | PROMOTER               | 0.64                                                         | 0.304                          | 2629.07            | 800.21             | 0.195                          | 1875.02            | 364.98             |
| A_68_P26980660  | chr10:19077044-19077088                           | NM_053008:722      | Olig3      | INSIDE                 | 0.222                                                        | 0.599                          | 7506.11            | 4498.61            | 0.133                          | 4946.21            | 658.21             |
| A_68_P23165465  | chr4:102986727-102986771                          | NM_025909:298      | Oma1       | INSIDE                 | 0.5                                                          | 6.059                          | 1403.97            | 8506.77            | 3.029                          | 1382.51            | 4186.96            |
| A_68_P23165462  | chr4:102986330-102986374                          | NM_025909:-98      | Oma1       | PROMOTER               | 0.514                                                        | 0.461                          | 1519.70            | 701.05             | 0.237                          | 1143.07            | 271.17             |
| A_68_P23165464  | chr4:102986645-102986689                          | NM_025909:216      | Oma1       | INSIDE                 | 0.549                                                        | 0.467                          | 1189.22            | 555.07             | 0.256                          | 974.75             | 249.59             |
| A_68_P26640627  | chr9:74710721-74710765                            | NM_008262:1015     | Onecut1    | INSIDE                 | 0.24                                                         | 0.480                          | 2957.01            | 1420.21            | 0.115                          | 2078.59            | 239.48             |
| A_68_P26640632  | chr9:74711201-74711245                            | NM_008262:1495     | Onecut1    | INSIDE                 | 0.358                                                        | 8.849                          | 3472.56            | 30729.65           | 3.167                          | 2743.16            | 8687.56            |
| A_68_P26640623  | chr9:74710266-74710310                            | NM_008262:561      | Onecut1    | INSIDE                 | 0.496                                                        | 7.179                          | 2147.83            | 15419.09           | 3.564                          | 1773.00            | 6318.86            |
| A_68_P31774686  | chr18:64500029-64500073                           | NM_194268:33       | Onecut2    | INSIDE                 | 0.219                                                        | 0.628                          | 5931.93            | 3723.46            | 0.138                          | 3936.79            | 541.98             |
| A_68_P20849642  | chr1:177622972-177623016                          | NM_010098:-273     | Opn3       | DIVERGENT_PROMOTER     | 0.636                                                        | 5.353                          | 3471.86            | 18585.79           | 3.406                          | 3086.55            | 10512.64           |
| A_68_P20849643  | chr1:177623101-177623145                          | NM_010098:-401     | Opn3       | DIVERGENT_PROMOTER     | 0.268                                                        | 2.264                          | 4445.38            | 10062.20           | 0.607                          | 3322.23            | 2017.76            |
| A_68_P24053482  | chr5:123464905-123464949                          | NM_175423:-156     | Orai1      | PROMOTER               | 0.136                                                        | 14.484                         | 1060.55            | 15360.69           | 1.975                          | 960.72             | 1897.46            |
| A_68_P24119778  | chr5:136646540-136646584                          | NM_178751:-36      | Orai2      | PROMOTER               | 0.45                                                         | 5.842                          | 836.92             | 4889.29            | 2.627                          | 733.34             | 1926.26            |
| A_68_P25507195  | chr7:134913265-134913309                          | NM_198424:-42      | Orai3      | PROMOTER               | 0.613                                                        | 0.222                          | 2175.93            | 483.65             | 0.136                          | 1638.56            | 223.10             |
| A_68_P20259227  | chr1:58561519-58561563                            | NM_001025378:-3280 | Orc2       | PROMOTER               | 0.589                                                        | 4.259                          | 686.39             | 2923.54            | 2.511                          | 568.86             | 1428.17            |
| A_68_P21199929  | chr2:48804619-48804663                            | NR_033442:147      | Orc4       | INSIDE                 | 0.477                                                        | 0.491                          | 1925.98            | 946.40             | 0.234                          | 1453.81            | 340.76             |
| A_68_P27280137  | chr10:79441295-79441339                           | NM_001003949:5759  | ORF61      | INSIDE                 | 0.208                                                        | 11.511                         | 1260.63            | 14511.06           | 2.399                          | 787.90             | 1889.86            |
| A_68_P27280132  | chr10:79440564-79440611                           | NM_001003949:6488  | ORF61      | INSIDE                 | 0.539                                                        | 5.788                          | 293.67             | 1699.88            | 3.123                          | 256.51             | 801.00             |
| A_68_P27534166  | chr10:126558114-126558159                         | NM_001171026:80    | Os9        | INSIDE                 | 0.224                                                        | 0.515                          | 2423.47            | 1249.02            | 0.115                          | 1797.69            | 207.29             |
| A_68_P27553494  | chr11:3605439-3605483                             | NM_152818:158446   | Osbp2      | INSIDE                 | 0.598                                                        | 2.585                          | 1511.05            | 3905.42            | 1.546                          | 1122.76            | 1736.14            |
| A_68_P31503253  | chr18:13020852-13020896                           | NM_207530:79355    | Osbp11a    | INSIDE                 | 0.584                                                        | 3.815                          | 1063.76            | 4058.62            | 2.227                          | 992.87             | 2211.00            |
| A_68_P21901578  | chr2:179854064-179854108                          | NM_144500:16       | Osbp12     | INSIDE                 | 0.09                                                         | 3.704                          | 6455.20            | 23912.12           | 0.333                          | 4839.36            | 1611.83            |
| A_68_P21350016  | chr2:76244453-76244497                            | NM_145525:-120     | Osbp16     | PROMOTER               | 0.655                                                        | 0.424                          | 2305.20            | 976.93             | 0.278                          | 1736.07            | 482.02             |
| A_68_P27447375  | chr10:110602439-110602483                         | NM_001003717:603   | Osbp18     | INSIDE                 | 0.651                                                        | 0.467                          | 1566.98            | 731.98             | 0.304                          | 1219.16            | 370.75             |
| A_68_P222752864 | chr4:15941113-15941157                            | NM_145950:-110     | Osgin2     | PROMOTER               | 0.235                                                        | 16.835                         | 1721.03            | 28973.48           | 3.949                          | 1747.87            | 6901.82            |
| A_68_P30132612  | chr15:35225823-35225867                           | NM_054049:-22      | Osr2       | PROMOTER               | 0.416                                                        | 4.479                          | 1599.47            | 7164.60            | 1.863                          | 1329.92            | 2477.58            |
| A_68_P30132613  | chr15:35225986-35226030                           | NM_054049:142      | Osr2       | INSIDE                 | 0.608                                                        | 0.360                          | 1403.60            | 504.98             | 0.219                          | 1072.54            | 234.70             |
| A_68_P30132591  | chr15:35223546-35223590                           | NM_054049:-2298    | Osr2       | PROMOTER               | 0.562                                                        | 0.596                          | 807.32             | 481.14             | 0.335                          | 693.25             | 232.09             |
| A_68_P23575371  | chr5:31210102-31210146                            | NM_001134692:-29   | Ost4       | PROMOTER               | 0.605                                                        | 0.470                          | 1426.47            | 670.70             | 0.284                          | 963.93             | 274.06             |
| A_68_P23575369  | chr5:31209729-31209773                            | NM_001134692:345   | Ost4       | INSIDE                 | 0.587                                                        | 2.833                          | 1452.17            | 4113.31            | 1.662                          | 1177.96            | 1957.94            |
| A_68_P31992143  | chr19:18706329-18706373                           | NM_017375:-47      | Ostf1      | DIVERGENT_PROMOTER     | 0.066                                                        | 45.820                         | 705.63             | 32332.11           | 3.031                          | 606.12             | 1837.27            |
| A_68_P27096130  | chr10:42398668-42398712                           | NM_172416:-31      | Ostm1      | PROMOTER               | 0.236                                                        | 34.151                         | 4846.33            | 165506.70          | 8.06                           | 5276.02            | 42523.68           |
| A_68_P23618578  | chr5:38668746-38668790                            | NM_172709:126      | Otop1      | INSIDE                 | 0.377                                                        | 5.384                          | 2020.57            | 10877.80           | 2.031                          | 1656.47            | 3364.31            |
| A_68_P23618575  | chr5:38668403-38668447                            | NM_172709:-218     | Otop1      | PROMOTER               | 0.64                                                         | 2.865                          | 3587.41            | 10278.44           | 1.834                          | 2748.74            | 5040.53            |
| A_68_P29237596  | chr13:95653350-95653394                           | NM_011021:7791     | Otp        | INSIDE                 | 0.361                                                        | 6.564                          | 1630.03            | 10699.32           | 2.369                          | 1420.95            | 3366.45            |
| A_68_P29237544  | chr13:95647510-95647554                           | NM_011021:1951     | Otp        | INSIDE                 | 0.418                                                        | 8.459                          | 803.47             | 6796.36            | 3.535                          | 662.45             | 2342.04            |
| A_68_P29237593  | chr13:95652973-95653017                           | NM_011021:7413     | Otp        | INSIDE                 | 0.434                                                        | 0.354                          | 1409.35            | 499.16             | 0.154                          | 1121.49            | 172.26             |

| ProbeName      | Target position of probe on CpG island microarray | TargetID            | GeneSymbol | CpG island Description | Ratio of relative methylation (TiO <sub>2</sub> -NP/Vehicle) | Sham group                     |                    |                    | TiO <sub>2</sub> -H group      |                    |                    |
|----------------|---------------------------------------------------|---------------------|------------|------------------------|--------------------------------------------------------------|--------------------------------|--------------------|--------------------|--------------------------------|--------------------|--------------------|
|                |                                                   |                     |            |                        |                                                              | Relative methylation (Cy5/Cy3) | Cy3 signal (Input) | Cy5 signal (MeDIP) | Relative methylation (Cy5/Cy3) | Cy3 signal (Input) | Cy5 signal (MeDIP) |
| A_68_P28697278 | chr12:104627062-104627106                         | NM_001177841:193    | Otub2      | INSIDE                 | 0.472                                                        | 4.197                          | 1689.66            | 7091.67            | 1.981                          | 1421.72            | 2816.69            |
| A_68_P23348674 | chr4:138469719-138469763                          | NM_028453:122       | Otub3      | INSIDE                 | 0.592                                                        | 7.623                          | 345.24             | 2631.58            | 4.513                          | 260.28             | 1174.73            |
| A_68_P25995588 | chr8:82163767-82163811                            | NM_001081164:214    | Otub4      | INSIDE                 | 0.374                                                        | 10.673                         | 527.04             | 5624.89            | 3.991                          | 449.80             | 1795.00            |
| A_68_P25995580 | chr8:82162925-82162969                            | NM_001081164:-628   | Otub4      | PROMOTER               | 0.644                                                        | 2.173                          | 2281.28            | 4957.91            | 1.4                            | 1862.88            | 2608.89            |
| A_68_P22747167 | chr4:14753409-14753453                            | NM_152812:304       | Otub6b     | INSIDE                 | 0.41                                                         | 0.624                          | 3781.30            | 2359.60            | 0.256                          | 3006.44            | 770.04             |
| A_68_P22347475 | chr3:95908828-95908872                            | NM_001025613:401    | Otub7b     | INSIDE                 | 0.483                                                        | 0.144                          | 3567.04            | 513.91             | 0.07                           | 2509.03            | 174.46             |
| A_68_P22347472 | chr3:95908537-95908581                            | NM_001025613:109    | Otub7b     | INSIDE                 | 0.428                                                        | 0.702                          | 1435.41            | 1008.30            | 0.3                            | 1199.47            | 360.22             |
| A_68_P22347474 | chr3:95908723-95908767                            | NM_001025613:295    | Otub7b     | INSIDE                 | 0.584                                                        | 0.736                          | 5681.96            | 4184.31            | 0.43                           | 4335.36            | 1863.95            |
| A_68_P22347470 | chr3:95908249-95908293                            | NM_001025613:-179   | Otub7b     | PROMOTER               | 0.547                                                        | 3.399                          | 597.16             | 2029.46            | 1.861                          | 492.41             | 916.13             |
| A_68_P27638910 | chr11:21901664-21901708                           | NM_011023:-32       | Otx1       | PROMOTER               | 0.58                                                         | 0.286                          | 2168.11            | 620.05             | 0.166                          | 1582.44            | 262.52             |
| A_68_P27638837 | chr11:21893202-21893246                           | NM_011023:8430      | Otx1       | DOWNSTREAM             | 0.656                                                        | 2.965                          | 862.32             | 2556.39            | 1.945                          | 728.67             | 1417.23            |
| A_68_P27638841 | chr11:21893689-21893733                           | NM_011023:7944      | Otx1       | DOWNSTREAM             | 0.591                                                        | 3.335                          | 834.04             | 2781.36            | 1.969                          | 636.89             | 1254.36            |
| A_68_P27924667 | chr11:74992384-74992428                           | NM_027136:-96       | Ovca2      | PROMOTER               | 0.399                                                        | 14.983                         | 2776.92            | 41605.28           | 5.972                          | 2340.53            | 13978.79           |
| A_68_P21706641 | chr2:144156468-144156512                          | NM_152947:608       | Ovol2      | INSIDE                 | 0.375                                                        | 11.109                         | 3392.51            | 37685.84           | 4.167                          | 3852.27            | 16051.29           |
| A_68_P21706649 | chr2:144157501-144157545                          | NM_152947:-424      | Ovol2      | PROMOTER               | 0.392                                                        | 0.355                          | 1504.90            | 534.44             | 0.139                          | 1212.79            | 168.91             |
| A_68_P30167378 | chr15:41620567-41620611                           | NM_001130163:-472   | Oxr1       | PROMOTER               | 0.359                                                        | 13.937                         | 1467.08            | 20446.09           | 5                              | 1165.76            | 5828.55            |
| A_68_P21630523 | chr2:130402275-130402319                          | NM_011025:388       | Oxt        | INSIDE                 | 0.606                                                        | 3.229                          | 3293.35            | 10632.68           | 1.955                          | 2662.77            | 5207.04            |
| A_68_P24051802 | chr5:123157935-123157979                          | NM_011026:391       | P2rx4      | INSIDE                 | 0.602                                                        | 3.859                          | 1353.86            | 5223.91            | 2.325                          | 1147.60            | 2667.73            |
| A_68_P22180925 | chr3:60806609-60806653                            | NM_008772:-86       | P2ry1      | PROMOTER               | 0.563                                                        | 3.096                          | 1840.23            | 5697.39            | 1.744                          | 1497.25            | 2611.95            |
| A_68_P25370889 | chr7:108147504-108147552                          | NM_008773:12977     | P2ry2      | INSIDE                 | 0.194                                                        | 2.385                          | 3640.34            | 8683.04            | 0.462                          | 2464.78            | 1139.41            |
| A_68_P25370888 | chr7:108147418-108147462                          | NM_008773:13065     | P2ry2      | INSIDE                 | 0.325                                                        | 9.426                          | 1621.03            | 15280.04           | 3.061                          | 1119.29            | 3426.53            |
| A_68_P25370976 | chr7:108160468-108160512                          | NM_008773:15        | P2ry2      | INSIDE                 | 0.573                                                        | 6.174                          | 2020.15            | 12472.53           | 3.535                          | 1785.01            | 6310.80            |
| A_68_P25370975 | chr7:108160402-108160446                          | NM_008773:81        | P2ry2      | INSIDE                 | 0.293                                                        | 0.708                          | 2778.38            | 1968.12            | 0.207                          | 2200.73            | 456.30             |
| A_68_P27168078 | chr10:58786437-58786481                           | NM_011030:415       | P4ha1      | INSIDE                 | 0.128                                                        | 28.226                         | 3736.78            | 105473.00          | 3.622                          | 3684.07            | 13342.36           |
| A_68_P27542078 | chr10:128003336-128003380                         | NM_011119:-368      | Pa2g4      | PROMOTER               | 0.278                                                        | 5.312                          | 4430.26            | 23532.50           | 1.477                          | 3126.35            | 4616.50            |
| A_68_P30139524 | chr15:36538383-36538427                           | NM_008774:324       | Pabpc1     | INSIDE                 | 0.15                                                         | 0.479                          | 8879.46            | 4255.60            | 0.072                          | 5877.48            | 423.28             |
| A_68_P30139531 | chr15:36539130-36539174                           | NM_008774:-424      | Pabpc1     | PROMOTER               | 0.552                                                        | 3.642                          | 1319.91            | 4807.70            | 2.011                          | 1111.23            | 2234.29            |
| A_68_P30139527 | chr15:36538715-36538759                           | NM_008774:-8        | Pabpc1     | PROMOTER               | 0.505                                                        | 2.852                          | 3355.60            | 9568.90            | 1.441                          | 2718.06            | 3916.37            |
| A_68_P32625282 | chrX:117040767-117040811                          | NM_053114:-16       | Pabpc5     | PROMOTER               | 0.385                                                        | 9.730                          | 1798.22            | 17496.54           | 3.745                          | 2107.84            | 7893.89            |
| A_68_P31117689 | chr17:27792526-27792570                           | NM_011861:-78       | Pacsin1    | PROMOTER               | 0.361                                                        | 7.965                          | 1179.05            | 9390.92            | 2.879                          | 910.40             | 2620.94            |
| A_68_P31117838 | chr17:27822326-27822370                           | NM_178365:150       | Pacsin1    | INSIDE                 | 0.476                                                        | 6.484                          | 4742.78            | 30750.53           | 3.087                          | 3710.82            | 11454.31           |
| A_68_P31117690 | chr17:27792675-27792719                           | NM_011861:70        | Pacsin1    | INSIDE                 | 0.567                                                        | 0.641                          | 1887.62            | 1210.79            | 0.364                          | 1351.59            | 491.59             |
| A_68_P21421545 | chr2:91095901-91095945                            | NM_030880:-1047     | Pacsin3    | PROMOTER               | 0.381                                                        | 11.652                         | 1128.44            | 13148.06           | 4.437                          | 1013.17            | 4495.89            |
| A_68_P27922136 | chr11:74536967-74537011                           | NR_037610:372       | Pafah1b1   | INSIDE                 | 0.539                                                        | 0.710                          | 1265.32            | 898.65             | 0.383                          | 1009.15            | 386.22             |
| A_68_P26477175 | chr9:45792523-45792567                            | NM_008775:410       | Pafah1b2   | INSIDE                 | 0.645                                                        | 2.810                          | 2243.23            | 6303.73            | 1.813                          | 1741.72            | 3157.73            |
| A_68_P25009543 | chr7:26082789-26082833                            | NM_008776:164       | Pafah1b3   | INSIDE                 | 0.45                                                         | 7.151                          | 2824.78            | 20201.14           | 3.221                          | 2067.08            | 6658.69            |
| A_68_P21939654 | chr3:9833650-9833694                              | NM_001195031:7      | Pag1       | INSIDE                 | 0.541                                                        | 0.381                          | 1729.65            | 658.87             | 0.206                          | 1385.24            | 285.29             |
| A_68_P23819021 | chr5:77380379-77380423                            | NM_025939:-35       | Paics      | PROMOTER               | 0.451                                                        | 0.304                          | 8363.93            | 2541.60            | 0.137                          | 5303.09            | 726.55             |
| A_68_P23819018 | chr5:77380092-77380136                            | NM_025939:-321      | Paics      | PROMOTER               | 0.619                                                        | 0.307                          | 2695.99            | 826.54             | 0.19                           | 1819.59            | 345.12             |
| A_68_P24595787 | chr6:83781567-83781611                            | NM_146169:147       | Paip2b     | INSIDE                 | 0.335                                                        | 1.710                          | 2043.91            | 3494.24            | 0.573                          | 1733.27            | 993.73             |
| A_68_P28975465 | chr13:41095865-41095909                           | NM_026550:-492      | Pak1ip1    | PROMOTER               | 0.53                                                         | 0.518                          | 1243.95            | 644.54             | 0.274                          | 883.89             | 242.58             |
| A_68_P30650846 | chr16:32079318-32079362                           | NM_177326:19        | Pak2       | INSIDE                 | 0.313                                                        | 26.788                         | 3755.46            | 100599.90          | 8.386                          | 3458.00            | 29000.34           |
| A_68_P30650841 | chr16:32078788-32078844                           | NM_177326:543       | Pak2       | INSIDE                 | 0.589                                                        | 9.849                          | 225.80             | 2223.77            | 5.805                          | 176.28             | 1023.40            |
| A_68_P25022782 | chr7:29383016-29383060                            | NM_027470:165       | Pak4       | INSIDE                 | 0.244                                                        | 0.401                          | 5364.48            | 2152.33            | 0.098                          | 3842.95            | 376.42             |
| A_68_P25022784 | chr7:29383198-29383242                            | NM_027470:-17       | Pak4       | PROMOTER               | 0.501                                                        | 5.118                          | 1812.93            | 9277.71            | 2.566                          | 1531.53            | 3930.21            |
| A_68_P25911981 | chr8:64238686-64238730                            | NM_001081390:142779 | Palld      | INSIDE                 | 0.638                                                        | 4.294                          | 916.27             | 3934.11            | 2.74                           | 861.27             | 2360.27            |

| ProbeName      | Target position of probe on CpG island microarray | TargetID            | GeneSymbol | CpG island Description | Ratio of relative methylation (TiO <sub>2</sub> -NP/Vehicle) | Sham group                     |                    |                    | TiO <sub>2</sub> -H group      |                    |                    |
|----------------|---------------------------------------------------|---------------------|------------|------------------------|--------------------------------------------------------------|--------------------------------|--------------------|--------------------|--------------------------------|--------------------|--------------------|
|                |                                                   |                     |            |                        |                                                              | Relative methylation (Cy5/Cy3) | Cy3 signal (Input) | Cy5 signal (MeDIP) | Relative methylation (Cy5/Cy3) | Cy3 signal (Input) | Cy5 signal (MeDIP) |
| A_68_P25910880 | chr8:64070053-64070097                            | NM_001081390:311413 | Palld      | INSIDE                 | 0.646                                                        | 9.035                          | 3129.17            | 28272.33           | 5.839                          | 2664.18            | 15556.16           |
| A_68_P25911983 | chr8:64238848-64238892                            | NM_001081390:142617 | Palld      | INSIDE                 | 0.594                                                        | 2.541                          | 2100.35            | 5336.70            | 1.51                           | 1569.52            | 2369.59            |
| A_68_P26017663 | chr8:86545319-86545363                            | NM_028877:-32       | Palm3      | DIVERGENT_PROMOTER     | 0.206                                                        | 18.549                         | 2207.36            | 40944.76           | 3.822                          | 1887.34            | 7213.31            |
| A_68_P26017662 | chr8:86545209-86545255                            | NM_028877:-140      | Palm3      | DIVERGENT_PROMOTER     | 0.183                                                        | 2.268                          | 1245.14            | 2824.33            | 0.414                          | 780.82             | 323.35             |
| A_68_P20474869 | chr1:99992118-99992162                            | NM_013626:69        | Pam        | INSIDE                 | 0.379                                                        | 5.052                          | 1169.79            | 5910.16            | 1.913                          | 1078.00            | 2061.93            |
| A_68_P24173631 | chr5:148241874-148241918                          | NM_028291:-259      | Pan3       | PROMOTER               | 0.599                                                        | 5.143                          | 3363.07            | 17296.50           | 3.081                          | 2658.09            | 8188.84            |
| A_68_P27708451 | chr11:35582769-35582813                           | NM_145962:-206      | Pank3      | PROMOTER               | 0.318                                                        | 0.523                          | 1397.59            | 731.27             | 0.167                          | 1056.64            | 176.04             |
| A_68_P27708454 | chr11:35583064-35583108                           | NM_145962:90        | Pank3      | INSIDE                 | 0.338                                                        | 5.069                          | 6332.95            | 32101.38           | 1.712                          | 5201.17            | 8906.74            |
| A_68_P27708453 | chr11:35582983-35583027                           | NM_145962:8         | Pank3      | INSIDE                 | 0.539                                                        | 0.239                          | 1971.65            | 471.67             | 0.129                          | 1361.41            | 175.45             |
| A_68_P27708457 | chr11:35583330-35583374                           | NM_145962:356       | Pank3      | INSIDE                 | 0.635                                                        | 3.373                          | 600.18             | 2024.63            | 2.144                          | 558.04             | 1196.29            |
| A_68_P23435277 | chr4:154338248-154338292                          | NM_172990:29        | Pank4      | INSIDE                 | 0.535                                                        | 12.199                         | 5930.10            | 72342.88           | 6.523                          | 4994.15            | 32579.02           |
| A_68_P23435279 | chr4:154338485-154338529                          | NM_172990:265       | Pank4      | INSIDE                 | 0.599                                                        | 0.554                          | 7413.89            | 4104.02            | 0.331                          | 5560.93            | 1842.69            |
| A_68_P30422819 | chr15:88890786-88890830                           | NM_001002005:653    | Panx2      | INSIDE                 | 0.538                                                        | 6.417                          | 1565.46            | 10045.75           | 3.454                          | 1402.24            | 4843.98            |
| A_68_P30422817 | chr15:88890519-88890563                           | NM_001002005:385    | Panx2      | INSIDE                 | 0.6                                                          | 3.165                          | 766.69             | 2426.33            | 1.899                          | 687.84             | 1306.22            |
| A_68_P26039507 | chr8:90723531-90723575                            | NM_001164497:441    | Papd5      | INSIDE                 | 0.35                                                         | 16.172                         | 2495.74            | 40361.61           | 5.663                          | 2223.68            | 12592.88           |
| A_68_P29116251 | chr13:69672583-69672627                           | NM_001169131:138    | Papd7      | INSIDE                 | 0.173                                                        | 12.721                         | 449.70             | 5720.77            | 2.197                          | 343.31             | 754.19             |
| A_68_P27648124 | chr11:23795033-23795077                           | NM_172555:216       | Papolg     | INSIDE                 | 0.18                                                         | 0.369                          | 3919.35            | 1448.16            | 0.067                          | 2619.80            | 174.63             |
| A_68_P27648126 | chr11:23795318-23795362                           | NM_172555:-70       | Papolg     | PROMOTER               | 0.347                                                        | 7.697                          | 4639.05            | 35706.53           | 2.673                          | 4139.32            | 11063.87           |
| A_68_P22532369 | chr3:131227486-131227530                          | NM_011863:-223      | Papss1     | PROMOTER               | 0.447                                                        | 0.287                          | 1722.67            | 493.94             | 0.128                          | 1338.38            | 171.68             |
| A_68_P31093353 | chr17:23876731-23876775                           | NM_023824:545       | Paqr4      | INSIDE                 | 0.401                                                        | 1.474                          | 1677.42            | 2472.02            | 0.591                          | 1241.24            | 733.31             |
| A_68_P22313388 | chr3:88170026-88170070                            | NM_198410:1538      | Paqr6      | INSIDE                 | 0.038                                                        | 16.223                         | 4686.10            | 76023.95           | 0.616                          | 3353.18            | 2065.33            |
| A_68_P20074998 | chr1:20880874-20880920                            | NM_028829:194       | Paqr8      | INSIDE                 | 0.428                                                        | 0.450                          | 2148.42            | 966.56             | 0.193                          | 1616.23            | 311.47             |
| A_68_P26742500 | chr9:95460884-95460928                            | NM_198414:671       | Paqr9      | INSIDE                 | 0.489                                                        | 3.956                          | 1484.25            | 5871.13            | 1.934                          | 1243.67            | 2404.78            |
| A_68_P26742492 | chr9:95459743-95459787                            | NM_198414:-471      | Paqr9      | PROMOTER               | 0.234                                                        | 0.703                          | 2517.68            | 1768.84            | 0.164                          | 1907.99            | 313.17             |
| A_68_P26742494 | chr9:95459899-95459943                            | NM_198414:-315      | Paqr9      | PROMOTER               | 0.492                                                        | 3.265                          | 1239.71            | 4047.93            | 1.606                          | 937.98             | 1506.42            |
| A_68_P26261064 | chr8:129588848-129588893                          | NM_001122850:915    | Pard3      | INSIDE                 | 0.497                                                        | 0.523                          | 4128.19            | 2160.81            | 0.26                           | 2853.95            | 743.11             |
| A_68_P26261059 | chr8:129588231-129588275                          | NM_001122850:297    | Pard3      | INSIDE                 | 0.55                                                         | 5.323                          | 1834.66            | 9765.90            | 2.929                          | 1410.85            | 4132.46            |
| A_68_P26261061 | chr8:129588412-129588456                          | NM_001122850:479    | Pard3      | INSIDE                 | 0.55                                                         | 0.619                          | 2397.64            | 1483.39            | 0.34                           | 1976.40            | 672.18             |
| A_68_P21839353 | chr2:167906491-167906535                          | NM_021409:9         | Pard6b     | INSIDE                 | 0.193                                                        | 21.921                         | 2334.74            | 51178.77           | 4.238                          | 2119.24            | 8981.94            |
| A_68_P21839351 | chr2:167906222-167906266                          | NM_021409:-259      | Pard6b     | PROMOTER               | 0.362                                                        | 13.741                         | 1204.19            | 16547.25           | 4.973                          | 1182.24            | 5879.23            |
| A_68_P30587017 | chr16:20302514-20302558                           | NM_001005767:-101   | Parl       | PROMOTER               | 0.534                                                        | 0.385                          | 2393.82            | 922.71             | 0.206                          | 1882.98            | 387.91             |
| A_68_P20876659 | chr1:182498959-182499003                          | NM_007415:-125      | Parp1      | PROMOTER               | 0.561                                                        | 7.485                          | 2330.79            | 17446.08           | 4.202                          | 2065.89            | 8681.63            |
| A_68_P24832848 | chr6:127403924-127403968                          | NM_181402:206       | Parp11     | INSIDE                 | 0.665                                                        | 2.149                          | 1688.07            | 3627.60            | 1.43                           | 1441.79            | 2061.21            |
| A_68_P24381543 | chr6:39067895-39067939                            | NM_172893:432       | Parp12     | INSIDE                 | 0.391                                                        | 5.853                          | 2016.33            | 11801.11           | 2.291                          | 1647.17            | 3774.16            |
| A_68_P26554375 | chr9:59465216-59465260                            | NM_001205239:148    | Parp6      | INSIDE                 | 0.455                                                        | 9.165                          | 2997.05            | 27467.10           | 4.173                          | 2346.25            | 9791.85            |
| A_68_P29360867 | chr13:117813151-117813195                         | NM_001081009:1151   | Parp8      | INSIDE                 | 0.542                                                        | 4.343                          | 2108.72            | 9159.16            | 2.354                          | 1783.52            | 4198.80            |
| A_68_P27551117 | chr11:3189431-3189475                             | NM_019574:-1007     | Patz1      | PROMOTER               | 0.065                                                        | 2.211                          | 3385.85            | 7487.73            | 0.144                          | 2638.23            | 379.08             |
| A_68_P27551126 | chr11:3190443-3190488                             | NM_019574:6         | Patz1      | INSIDE                 | 0.547                                                        | 2.862                          | 1777.35            | 5086.40            | 1.565                          | 1447.92            | 2266.69            |
| A_68_P27551118 | chr11:3189560-3189605                             | NM_019574:-877      | Patz1      | PROMOTER               | 0.198                                                        | 6.930                          | 4036.75            | 27975.50           | 1.371                          | 3438.14            | 4714.94            |
| A_68_P21723786 | chr2:147191194-147191239                          | NM_008780:487       | Pax1       | INSIDE                 | 0.665                                                        | 20.511                         | 670.62             | 13755.08           | 13.634                         | 655.27             | 8933.76            |
| A_68_P32134165 | chr19:44825072-44825116                           | NM_011037:-6789     | Pax2       | PROMOTER               | 0.378                                                        | 0.503                          | 2070.40            | 1042.38            | 0.19                           | 1376.71            | 261.96             |
| A_68_P32134233 | chr19:44833666-44833710                           | NM_011037:1805      | Pax2       | INSIDE                 | 0.591                                                        | 0.442                          | 4629.59            | 2045.77            | 0.261                          | 3281.49            | 856.37             |
| A_68_P32134818 | chr19:44911149-44911193                           | NM_011037:79287     | Pax2       | INSIDE                 | 0.65                                                         | 0.194                          | 6713.00            | 1300.47            | 0.126                          | 4614.66            | 581.06             |
| A_68_P32134209 | chr19:44830746-44830790                           | NM_011037:-1115     | Pax2       | PROMOTER               | 0.663                                                        | 2.719                          | 5207.22            | 14158.57           | 1.802                          | 4079.18            | 7350.84            |
| A_68_P32134813 | chr19:44910513-44910557                           | NM_011037:78651     | Pax2       | INSIDE                 | 0.281                                                        | 0.723                          | 2104.44            | 1521.21            | 0.203                          | 1548.23            | 314.14             |
| A_68_P22878697 | chr4:44723513-44723557                            | NM_008782:-222      | Pax5       | PROMOTER               | 0.471                                                        | 7.043                          | 1725.62            | 12152.83           | 3.319                          | 1327.63            | 4406.15            |

| ProbeName      | Target position of probe on CpG island microarray | TargetID           | GeneSymbol | CpG island Description | Ratio of relative methylation (TiO <sub>2</sub> -NP/Vehicle) | Sham group                     |                    |                    | TiO <sub>2</sub> -H group      |                    |                    |
|----------------|---------------------------------------------------|--------------------|------------|------------------------|--------------------------------------------------------------|--------------------------------|--------------------|--------------------|--------------------------------|--------------------|--------------------|
|                |                                                   |                    |            |                        |                                                              | Relative methylation (Cy5/Cy3) | Cy3 signal (Input) | Cy5 signal (MeDIP) | Relative methylation (Cy5/Cy3) | Cy3 signal (Input) | Cy5 signal (MeDIP) |
| A_68_P22878646 | chr4:44717054-44717098                            | NM_008782:6236     | Pax5       | INSIDE                 | 0.533                                                        | 6.133                          | 1632.46            | 10011.37           | 3.268                          | 1241.78            | 4058.51            |
| A_68_P21495913 | chr2:105509959-105510003                          | NR_002867:507      | Pax6os1    | INSIDE                 | 0.542                                                        | 0.478                          | 1459.96            | 698.18             | 0.259                          | 1162.57            | 301.44             |
| A_68_P25948238 | chr8:72356673-72356717                            | NM_001024954:92    | Pbx4       | INSIDE                 | 0.581                                                        | 0.291                          | 1622.17            | 472.37             | 0.169                          | 1136.78            | 192.41             |
| A_68_P24610520 | chr6:86475945-86475989                            | NM_011865:193      | Pcbp1      | INSIDE                 | 0.406                                                        | 6.884                          | 2278.48            | 15684.45           | 2.796                          | 1795.30            | 5019.68            |
| A_68_P24610513 | chr6:86475289-86475333                            | NM_011865:849      | Pcbp1      | INSIDE                 | 0.591                                                        | 5.513                          | 1592.12            | 8777.15            | 3.261                          | 1305.26            | 4255.89            |
| A_68_P30498007 | chr15:102301316-102301361                         | NM_001103165:276   | Pcbp2      | INSIDE                 | 0.6                                                          | 0.535                          | 1892.09            | 1012.28            | 0.321                          | 1369.34            | 439.88             |
| A_68_P27265105 | chr10:76424885-76424929                           | NM_021568:-214     | Pcbp3      | PROMOTER               | 0.301                                                        | 60.852                         | 7248.18            | 441069.30          | 18.327                         | 7274.33            | 133313.50          |
| A_68_P27265104 | chr10:76424807-76424851                           | NM_021568:-136     | Pcbp3      | PROMOTER               | 0.449                                                        | 0.214                          | 2525.51            | 539.36             | 0.096                          | 1781.10            | 170.89             |
| A_68_P27265101 | chr10:76424431-76424475                           | NM_021568:240      | Pcbp3      | INSIDE                 | 0.658                                                        | 2.946                          | 4474.32            | 13182.71           | 1.938                          | 3546.01            | 6870.54            |
| A_68_P26803472 | chr9:106355981-106356025                          | NM_021567:-185     | Pcbp4      | PROMOTER               | 0.423                                                        | 0.487                          | 4136.53            | 2014.62            | 0.206                          | 3021.83            | 622.23             |
| A_68_P26803474 | chr9:106356284-106356328                          | NM_021567:119      | Pcbp4      | INSIDE                 | 0.461                                                        | 3.852                          | 12225.09           | 47096.56           | 1.777                          | 9829.10            | 17462.05           |
| A_68_P26772513 | chr9:100935215-100935259                          | NM_025835:58       | Pceb       | INSIDE                 | 0.308                                                        | 13.213                         | 6626.56            | 87559.59           | 4.076                          | 6324.75            | 25778.49           |
| A_68_P31632704 | chr18:38371400-38371444                           | NM_029357:-2006    | Pcdh1      | PROMOTER               | 0.41                                                         | 7.700                          | 1854.85            | 14282.33           | 3.155                          | 1638.91            | 5171.49            |
| A_68_P31632591 | chr18:38357539-38357583                           | NM_029357:11856    | Pcdh1      | INSIDE                 | 0.361                                                        | 5.411                          | 1318.83            | 7136.02            | 1.952                          | 925.57             | 1806.74            |
| A_68_P31632606 | chr18:38358924-38358968                           | NM_029357:10470    | Pcdh1      | INSIDE                 | 0.529                                                        | 3.137                          | 1577.52            | 4948.22            | 1.661                          | 1118.83            | 1857.86            |
| A_68_P22101775 | chr3:45185176-45185220                            | NM_011043:2879     | Pcdh10     | INSIDE                 | 0.563                                                        | 4.813                          | 1031.57            | 4964.96            | 2.709                          | 886.35             | 2401.00            |
| A_68_P22101761 | chr3:45183553-45183597                            | NM_011043:1255     | Pcdh10     | INSIDE                 | 0.487                                                        | 3.461                          | 2322.96            | 8039.93            | 1.687                          | 1843.89            | 3110.86            |
| A_68_P22101773 | chr3:45184916-45184960                            | NM_011043:2619     | Pcdh10     | INSIDE                 | 0.434                                                        | 3.413                          | 1906.87            | 6508.29            | 1.48                           | 1674.26            | 2477.41            |
| A_68_P29773654 | chr14:84846918-84846962                           | NM_001013753:3571  | Pcdh17     | INSIDE                 | 0.54                                                         | 0.159                          | 3338.06            | 529.70             | 0.086                          | 1991.07            | 170.49             |
| A_68_P29773624 | chr14:84843322-84843371                           | NM_001013753:-23   | Pcdh17     | PROMOTER               | 0.559                                                        | 3.936                          | 754.25             | 2968.52            | 2.199                          | 559.14             | 1229.38            |
| A_68_P29753340 | chr14:80169561-80169605                           | NM_001042726:1537  | Pcdh8      | INSIDE                 | 0.421                                                        | 0.413                          | 1704.59            | 703.93             | 0.174                          | 1327.17            | 230.53             |
| A_68_P29753373 | chr14:80173634-80173678                           | NM_001042726:-2537 | Pcdh8      | PROMOTER               | 0.427                                                        | 0.262                          | 1902.41            | 499.27             | 0.112                          | 1523.53            | 170.73             |
| A_68_P29753346 | chr14:80170179-80170223                           | NM_001042726:919   | Pcdh8      | INSIDE                 | 0.564                                                        | 2.791                          | 871.53             | 2432.14            | 1.575                          | 768.35             | 1210.25            |
| A_68_P31626159 | chr18:37091821-37091865                           | NM_198117:-7016    | Pcdha2     | PROMOTER               | 0.494                                                        | 5.357                          | 634.05             | 3396.85            | 2.647                          | 538.83             | 1426.16            |
| A_68_P31626317 | chr18:37114129-37114173                           | NM_009959:-5943    | Pcdha5     | PROMOTER               | 0.463                                                        | 4.326                          | 2315.20            | 10015.39           | 2.004                          | 1589.34            | 3185.05            |
| A_68_P31626864 | chr18:37249859-37249905                           | NM_001003671:93    | Pcdhac1    | INSIDE                 | 0.416                                                        | 0.500                          | 1041.32            | 520.72             | 0.208                          | 823.88             | 171.49             |
| A_68_P31630106 | chr18:37965667-37965711                           | NM_033581:-375     | Pcdhgc3    | PROMOTER               | 0.643                                                        | 0.466                          | 1514.64            | 706.44             | 0.3                            | 1307.46            | 392.29             |
| A_68_P31630110 | chr18:37966049-37966093                           | NM_033582:-8662    | Pcdhgc4    | PROMOTER               | 0.661                                                        | 0.488                          | 2038.82            | 994.99             | 0.323                          | 1607.29            | 518.55             |
| A_68_P31630116 | chr18:37966805-37966849                           | NM_033582:-7906    | Pcdhgc4    | PROMOTER               | 0.613                                                        | 0.624                          | 937.34             | 585.31             | 0.383                          | 813.20             | 311.43             |
| A_68_P25326014 | chr7:99817883-99817941                            | NM_029078:510      | Pcf11      | INSIDE                 | 0.379                                                        | 8.419                          | 805.85             | 6784.74            | 3.195                          | 700.22             | 2237.02            |
| A_68_P25326017 | chr7:99818284-99818328                            | NM_029078:116      | Pcf11      | INSIDE                 | 0.321                                                        | 2.236                          | 5195.96            | 11618.03           | 0.718                          | 3522.71            | 2529.81            |
| A_68_P24591291 | chr6:83027998-83028042                            | NM_197992:-363     | Pcgf1      | DIVERGENT_PROMOTER     | 0.647                                                        | 0.572                          | 1747.29            | 999.98             | 0.37                           | 1462.91            | 541.51             |
| A_68_P23972071 | chr5:108890061-108890105                          | NM_172716:-268     | Pcgf3      | PROMOTER               | 0.451                                                        | 3.560                          | 2483.95            | 8842.31            | 1.607                          | 1902.13            | 3055.81            |
| A_68_P32089884 | chr19:36484605-36484649                           | NM_029508:31070    | Pcgf5      | INSIDE                 | 0.449                                                        | 6.768                          | 307.52             | 2081.21            | 3.04                           | 267.90             | 814.47             |
| A_68_P32089882 | chr19:36484156-36484200                           | NM_029508:30622    | Pcgf5      | INSIDE                 | 0.507                                                        | 2.870                          | 3713.21            | 10655.91           | 1.454                          | 3064.11            | 4455.91            |
| A_68_P25666154 | chr8:13104856-13104900                            | NM_178708:465      | Pcid2      | INSIDE                 | 0.313                                                        | 1.454                          | 1030.93            | 1499.28            | 0.456                          | 838.07             | 382.05             |
| A_68_P21820253 | chr2:164705104-164705148                          | NM_146129:259      | Pcif1      | INSIDE                 | 0.61                                                         | 4.877                          | 1774.67            | 8654.58            | 2.974                          | 1443.95            | 4294.59            |
| A_68_P21820252 | chr2:164704950-164704994                          | NM_146129:105      | Pcif1      | INSIDE                 | 0.623                                                        | 0.512                          | 3429.51            | 1756.11            | 0.319                          | 2458.11            | 784.06             |
| A_68_P29618378 | chr14:56159260-56159304                           | NM_028994:180      | Pck2       | INSIDE                 | 0.579                                                        | 0.715                          | 4052.08            | 2898.03            | 0.414                          | 2880.19            | 1193.46            |
| A_68_P25809871 | chr8:42325399-42325443                            | NM_023662:308      | Pcm1       | INSIDE                 | 0.388                                                        | 0.356                          | 1996.55            | 710.70             | 0.138                          | 1690.27            | 233.57             |
| A_68_P25809870 | chr8:42325280-42325324                            | NM_023662:190      | Pcm1       | INSIDE                 | 0.598                                                        | 20.372                         | 600.65             | 12236.76           | 12.174                         | 474.91             | 5781.50            |
| A_68_P20015305 | chr1:7078905-7078949                              | NM_183028:-74      | Pcmtd1     | PROMOTER               | 0.433                                                        | 4.291                          | 1433.68            | 6152.17            | 1.859                          | 1324.33            | 2462.57            |
| A_68_P26254550 | chr8:128421964-128422008                          | NM_175561:207      | Penx12     | INSIDE                 | 0.656                                                        | 3.055                          | 1821.17            | 5564.46            | 2.005                          | 1508.63            | 3024.68            |
| A_68_P31930177 | chr19:5688405-5688449                             | NM_144868:482      | Penx13     | INSIDE                 | 0.483                                                        | 0.243                          | 2046.69            | 496.61             | 0.117                          | 1472.61            | 172.73             |
| A_68_P32240903 | chrX:7500233-7500277                              | NM_013892:3307     | Pesk1n     | INSIDE                 | 0.473                                                        | 6.294                          | 1017.24            | 6402.24            | 2.98                           | 1184.74            | 3529.96            |
| A_68_P31988616 | chr19:17911313-17911358                           | NM_001190483:787   | Pesk5      | INSIDE                 | 0.45                                                         | 0.337                          | 1443.70            | 486.23             | 0.152                          | 1119.48            | 169.81             |

| ProbeName      | Target position of probe on CpG island microarray | TargetID           | GeneSymbol | CpG island Description | Ratio of relative methylation (TiO <sub>2</sub> -NP/Vehicle) | Sham group                     |                    |                    | TiO <sub>2</sub> -H group      |                    |                    |
|----------------|---------------------------------------------------|--------------------|------------|------------------------|--------------------------------------------------------------|--------------------------------|--------------------|--------------------|--------------------------------|--------------------|--------------------|
|                |                                                   |                    |            |                        |                                                              | Relative methylation (Cy5/Cy3) | Cy3 signal (Input) | Cy5 signal (MeDIP) | Relative methylation (Cy5/Cy3) | Cy3 signal (Input) | Cy5 signal (MeDIP) |
| A_68_P31923511 | chr19:4510848-4510892                             | NM_001162946:399   | Pcx        | INSIDE                 | 0.488                                                        | 0.532                          | 1414.40            | 753.06             | 0.26                           | 1096.72            | 284.98             |
| A_68_P31923505 | chr19:4510153-4510197                             | NM_001162946:-297  | Pcx        | PROMOTER               | 0.625                                                        | 0.718                          | 2297.18            | 1650.27            | 0.449                          | 1500.34            | 673.19             |
| A_68_P31759277 | chr18:61867112-61867156                           | NM_172832:155      | Pcyox11    | INSIDE                 | 0.567                                                        | 3.870                          | 3761.24            | 14556.32           | 2.195                          | 2992.97            | 6570.01            |
| A_68_P31759276 | chr18:61867012-61867056                           | NM_172832:255      | Pcyox11    | INSIDE                 | 0.66                                                         | 0.708                          | 3106.76            | 2199.06            | 0.467                          | 2249.29            | 1051.40            |
| A_68_P30652427 | chr16:32431113-32431157                           | NM_001163160:-181  | Pcyt1a     | PROMOTER               | 0.252                                                        | 0.372                          | 2644.62            | 983.12             | 0.094                          | 1838.39            | 171.98             |
| A_68_P30652428 | chr16:32431215-32431259                           | NM_001163160:-79   | Pcyt1a     | PROMOTER               | 0.297                                                        | 0.482                          | 2116.12            | 1020.56            | 0.143                          | 1564.64            | 223.97             |
| A_68_P30652424 | chr16:32430803-32430847                           | NM_009981:-182     | Pcyt1a     | PROMOTER               | 0.639                                                        | 0.580                          | 2424.65            | 1405.91            | 0.371                          | 1787.92            | 662.81             |
| A_68_P30652425 | chr16:32430923-32430967                           | NM_009981:-62      | Pcyt1a     | PROMOTER               | 0.426                                                        | 0.682                          | 2737.46            | 1867.17            | 0.291                          | 1691.80            | 491.66             |
| A_68_P24164494 | chr5:145900797-145900843                          | NM_001033313:138   | Pdap1      | INSIDE                 | 0.316                                                        | 7.415                          | 5487.08            | 40685.70           | 2.341                          | 4441.77            | 10397.62           |
| A_68_P22246600 | chr3:75360381-75360425                            | NM_019745:319      | Pdcd10     | INSIDE                 | 0.606                                                        | 3.055                          | 7609.69            | 23251.20           | 1.853                          | 5322.36            | 9862.28            |
| A_68_P31066146 | chr17:15663980-15664024                           | NM_008799:263      | Pdcd2      | INSIDE                 | 0.39                                                         | 5.868                          | 969.56             | 5688.96            | 2.287                          | 799.67             | 1829.10            |
| A_68_P25050417 | chr7:36432045-36432089                            | NM_019746:435      | Pdcd5      | INSIDE                 | 0.664                                                        | 0.425                          | 1179.48            | 501.46             | 0.282                          | 981.05             | 276.98             |
| A_68_P29145568 | chr13:74454823-74454867                           | NM_011051:-70      | Pdcd6      | PROMOTER               | 0.64                                                         | 0.705                          | 3326.22            | 2345.03            | 0.451                          | 2534.64            | 1143.93            |
| A_68_P29145569 | chr13:74454902-74454946                           | NM_011051:-150     | Pdcd6      | PROMOTER               | 0.355                                                        | 1.387                          | 1068.42            | 1481.85            | 0.492                          | 887.53             | 436.83             |
| A_68_P26587151 | chr9:65194360-65194404                            | NM_016688:508      | Pdcd7      | INSIDE                 | 0.572                                                        | 6.096                          | 504.72             | 3076.89            | 3.485                          | 494.57             | 1723.39            |
| A_68_P20163207 | chr1:39044543-39044587                            | NM_026850:-94      | Pdcl3      | PROMOTER               | 0.343                                                        | 0.505                          | 1441.50            | 728.03             | 0.173                          | 1149.55            | 199.12             |
| A_68_P31029172 | chr17:8994701-8994745                             | NM_011866:113      | Pde10a     | INSIDE                 | 0.379                                                        | 4.533                          | 4186.23            | 18975.07           | 1.719                          | 3483.54            | 5988.31            |
| A_68_P25373531 | chr7:108599782-108599826                          | NR_026574:-17      | Pde2a      | PROMOTER               | 0.519                                                        | 0.370                          | 5109.07            | 1888.07            | 0.192                          | 3728.98            | 714.54             |
| A_68_P25373532 | chr7:108599866-108599910                          | NR_026574:67       | Pde2a      | INSIDE                 | 0.57                                                         | 0.255                          | 2628.54            | 671.15             | 0.145                          | 1842.47            | 268.08             |
| A_68_P25373530 | chr7:108599609-108599653                          | NM_001143849:-135  | Pde2a      | PROMOTER               | 0.652                                                        | 0.689                          | 2865.24            | 1973.60            | 0.449                          | 2143.41            | 962.23             |
| A_68_P24898883 | chr6:141198105-141198149                          | NM_018779:337      | Pde3a      | INSIDE                 | 0.409                                                        | 4.231                          | 1405.88            | 5947.70            | 1.73                           | 1153.49            | 1995.38            |
| A_68_P24898887 | chr6:141198621-141198665                          | NM_018779:853      | Pde3a      | INSIDE                 | 0.348                                                        | 4.322                          | 1811.05            | 7826.88            | 1.505                          | 1348.40            | 2029.04            |
| A_68_P25435757 | chr7:121559995-121560039                          | NM_011055:1249     | Pde3b      | INSIDE                 | 0.429                                                        | 7.146                          | 1742.10            | 12448.95           | 3.065                          | 1398.90            | 4287.13            |
| A_68_P25435753 | chr7:121559659-121559703                          | NM_011055:913      | Pde3b      | INSIDE                 | 0.487                                                        | 3.110                          | 1263.06            | 3928.14            | 1.514                          | 1114.35            | 1686.83            |
| A_68_P25435752 | chr7:121559588-121559632                          | NM_011055:843      | Pde3b      | INSIDE                 | 0.488                                                        | 3.049                          | 1388.17            | 4232.17            | 1.486                          | 1204.26            | 1790.11            |
| A_68_P26345770 | chr9:20970026-20970070                            | NM_183408:-109     | Pde4a      | PROMOTER               | 0.569                                                        | 7.554                          | 1112.68            | 8405.08            | 4.298                          | 889.97             | 3824.89            |
| A_68_P26345851 | chr9:20988585-20988629                            | NM_183408:18449    | Pde4a      | INSIDE                 | 0.584                                                        | 2.524                          | 2409.20            | 6081.60            | 1.475                          | 1981.96            | 2923.83            |
| A_68_P25953728 | chr8:73267438-73267482                            | NM_201607:19498    | Pde4c      | INSIDE                 | 0.307                                                        | 5.992                          | 1118.37            | 6700.93            | 1.841                          | 970.15             | 1785.97            |
| A_68_P29314989 | chr13:109906595-109906639                         | NM_011056:462246   | Pde4d      | INSIDE                 | 0.637                                                        | 0.605                          | 1717.73            | 1038.81            | 0.385                          | 1351.37            | 520.42             |
| A_68_P29314992 | chr13:109906946-109906990                         | NM_011056:462598   | Pde4d      | INSIDE                 | 0.346                                                        | 2.018                          | 10150.78           | 20483.50           | 0.698                          | 7906.44            | 5521.04            |
| A_68_P22356816 | chr3:97671824-97671868                            | NM_177145:389      | Pde4dip    | INSIDE                 | 0.108                                                        | 0.583                          | 3541.46            | 2063.68            | 0.063                          | 2669.53            | 168.57             |
| A_68_P22484168 | chr3:122432681-122432725                          | NM_153422:627      | Pde5a      | INSIDE                 | 0.471                                                        | 8.095                          | 1777.89            | 14392.46           | 3.814                          | 1529.93            | 5834.51            |
| A_68_P29239503 | chr13:95992534-95992578                           | NM_001170669:449   | Pde8b      | INSIDE                 | 0.622                                                        | 8.204                          | 1422.05            | 11666.24           | 5.106                          | 1214.95            | 6203.03            |
| A_68_P31139421 | chr17:31523560-31523605                           | NM_001163748:404   | Pde9a      | INSIDE                 | 0.462                                                        | 0.480                          | 1719.00            | 825.19             | 0.222                          | 1303.97            | 289.18             |
| A_68_P31139420 | chr17:31523449-31523493                           | NM_001163748:292   | Pde9a      | INSIDE                 | 0.659                                                        | 0.613                          | 1884.57            | 1155.80            | 0.404                          | 1565.75            | 632.34             |
| A_68_P24132957 | chr5:139469288-139469332                          | NM_008808:1597     | Pdgfa      | INSIDE                 | 0.559                                                        | 0.604                          | 2147.47            | 1296.16            | 0.337                          | 1577.16            | 532.02             |
| A_68_P24132973 | chr5:139471053-139471097                          | NM_008808:-167     | Pdgfa      | PROMOTER               | 0.323                                                        | 0.635                          | 1899.29            | 1206.37            | 0.205                          | 1326.51            | 272.22             |
| A_68_P24132963 | chr5:139469932-139469976                          | NM_008808:953      | Pdgfa      | INSIDE                 | 0.296                                                        | 5.390                          | 4372.21            | 23564.20           | 1.594                          | 3536.25            | 5638.33            |
| A_68_P30369715 | chr15:79843444-79843488                           | NM_011057:1772     | Pdgfb      | INSIDE                 | 0.457                                                        | 0.627                          | 731.90             | 458.83             | 0.286                          | 597.95             | 171.26             |
| A_68_P22271772 | chr3:80841440-80841484                            | NM_019971:1125     | Pdgfc      | INSIDE                 | 0.529                                                        | 0.278                          | 1777.49            | 494.85             | 0.147                          | 1183.10            | 174.27             |
| A_68_P23807625 | chr5:75548984-75549028                            | NM_001083316:-3184 | Pdgfra     | PROMOTER               | 0.529                                                        | 6.698                          | 2568.52            | 17204.50           | 3.543                          | 2020.43            | 7157.85            |
| A_68_P23807627 | chr5:75549167-75549211                            | NM_001083316:-3002 | Pdgfra     | PROMOTER               | 0.649                                                        | 0.335                          | 1714.13            | 574.87             | 0.218                          | 1296.09            | 282.12             |
| A_68_P32778409 | chrX:156576281-156576325                          | NM_008810:-34      | Pdha1      | PROMOTER               | 0.48                                                         | 16.506                         | 557.58             | 9203.49            | 7.923                          | 646.04             | 5118.87            |
| A_68_P29388212 | chr14:9005175-9005219                             | NM_024221:310      | Pdha2      | INSIDE                 | 0.59                                                         | 0.650                          | 3662.54            | 2381.19            | 0.383                          | 2672.32            | 1024.60            |
| A_68_P30670431 | chr16:35490952-35490996                           | NM_028295:-15      | Pdia5      | PROMOTER               | 0.551                                                        | 0.388                          | 1699.98            | 659.14             | 0.214                          | 1408.36            | 301.15             |
| A_68_P30670423 | chr16:35490181-35490225                           | NM_028295:757      | Pdia5      | INSIDE                 | 0.662                                                        | 0.162                          | 4058.80            | 656.69             | 0.107                          | 2935.56            | 314.63             |

| ProbeName      | Target position of probe on CpG island microarray | TargetID           | GeneSymbol | CpG island Description | Ratio of relative methylation (TiO <sub>2</sub> -NP/Vehicle) | Sham group                     |                    |                    | TiO <sub>2</sub> -H group      |                    |                    |
|----------------|---------------------------------------------------|--------------------|------------|------------------------|--------------------------------------------------------------|--------------------------------|--------------------|--------------------|--------------------------------|--------------------|--------------------|
|                |                                                   |                    |            |                        |                                                              | Relative methylation (Cy5/Cy3) | Cy3 signal (Input) | Cy5 signal (MeDIP) | Relative methylation (Cy5/Cy3) | Cy3 signal (Input) | Cy5 signal (MeDIP) |
| A_68_P30670429 | chr16:35490684-35490728                           | NM_028295:253      | Pdia5      | INSIDE                 | 0.356                                                        | 0.649                          | 7367.00            | 4777.89            | 0.231                          | 5180.93            | 1195.34            |
| A_68_P23322029 | chr4:133843071-133843115                          | NM_001163794:76    | Pdik11     | INSIDE                 | 0.381                                                        | 5.853                          | 10137.97           | 59336.73           | 2.23                           | 8273.17            | 18448.61           |
| A_68_P23322026 | chr4:133842693-133842737                          | NM_001163794:454   | Pdik11     | INSIDE                 | 0.662                                                        | 3.106                          | 1060.70            | 3294.43            | 2.056                          | 913.87             | 1878.85            |
| A_68_P23322032 | chr4:133843514-133843558                          | NM_001163794:-368  | Pdik11     | PROMOTER               | 0.097                                                        | 17.777                         | 748.47             | 13305.30           | 1.723                          | 1255.60            | 2163.19            |
| A_68_P21322072 | chr2:71711713-71711757                            | NM_172665:406      | Pdk1       | INSIDE                 | 0.491                                                        | 7.754                          | 570.64             | 4424.47            | 3.81                           | 492.57             | 1876.89            |
| A_68_P28036286 | chr11:94902671-94902715                           | NM_133667:-7       | Pdk2       | PROMOTER               | 0.533                                                        | 3.694                          | 1625.21            | 6004.20            | 1.968                          | 1351.91            | 2660.51            |
| A_68_P32536210 | chrX:91077357-91077401                            | NM_145630:56       | Pdk3       | INSIDE                 | 0.537                                                        | 6.230                          | 1146.82            | 7144.60            | 3.347                          | 1333.01            | 4461.83            |
| A_68_P24210894 | chr6:5446053-5446097                              | NM_013743:204      | Pdk4       | INSIDE                 | 0.129                                                        | 20.420                         | 707.54             | 14448.01           | 2.631                          | 585.76             | 1541.22            |
| A_68_P32107651 | chr19:40346260-40346304                           | NM_016861:-176     | Pdlim1     | PROMOTER               | 0.629                                                        | 0.552                          | 882.82             | 487.14             | 0.347                          | 730.85             | 253.51             |
| A_68_P31095624 | chr17:24278101-24278145                           | NM_001080773:434   | Pdpk1      | INSIDE                 | 0.355                                                        | 5.833                          | 3189.21            | 18601.60           | 2.068                          | 2769.00            | 5727.13            |
| A_68_P21752417 | chr2:152841063-152841107                          | NM_178939:35       | Pdrg1      | INSIDE                 | 0.443                                                        | 0.338                          | 1554.73            | 524.86             | 0.15                           | 1148.52            | 171.73             |
| A_68_P24172759 | chr5:148081959-148082003                          | NM_008814:274      | Pdx1       | INSIDE                 | 0.67                                                         | 0.173                          | 3429.37            | 594.67             | 0.116                          | 2570.26            | 298.82             |
| A_68_P30363152 | chr15:78744712-78744756                           | NM_020271:386      | Pdxp       | INSIDE                 | 0.607                                                        | 6.807                          | 1048.38            | 7136.82            | 4.134                          | 840.81             | 3475.76            |
| A_68_P21626037 | chr2:129514047-129514091                          | NM_018863:1536     | Pdyn       | INSIDE                 | 0.444                                                        | 7.988                          | 2883.12            | 23030.88           | 3.546                          | 1823.95            | 6467.65            |
| A_68_P21626036 | chr2:129513877-129513921                          | NM_018863:1706     | Pdyn       | INSIDE                 | 0.654                                                        | 3.055                          | 2358.70            | 7206.16            | 1.999                          | 1920.54            | 3838.54            |
| A_68_P32464984 | chrX:71070091-71070135                            | NM_001029868:196   | Pdzd4      | INSIDE                 | 0.287                                                        | 13.677                         | 720.77             | 9857.79            | 3.923                          | 813.65             | 3192.02            |
| A_68_P32218816 | chr19:59419677-59419721                           | NM_001033222:572   | Pdzd8      | INSIDE                 | 0.658                                                        | 0.479                          | 1183.09            | 566.66             | 0.315                          | 975.31             | 307.55             |
| A_68_P24697529 | chr6:101327967-101328012                          | NM_018884:-98      | Pdzrn3     | PROMOTER               | 0.563                                                        | 8.650                          | 1183.07            | 10233.63           | 4.874                          | 902.46             | 4398.20            |
| A_68_P22309854 | chr3:87572957-87573001                            | NM_001032413:-103  | Pear1      | PROMOTER               | 0.231                                                        | 7.991                          | 1373.70            | 10976.56           | 1.844                          | 1231.18            | 2270.21            |
| A_68_P20335741 | chr1:72301294-72301338                            | NM_023523:29572    | Pecr       | DOWNSTREAM             | 0.522                                                        | 4.101                          | 2305.36            | 9455.12            | 2.143                          | 2048.03            | 4388.60            |
| A_68_P25169318 | chr7:69609337-69609381                            | NM_013788:38       | Peg12      | INSIDE                 | 0.269                                                        | 7.906                          | 921.86             | 7288.09            | 2.129                          | 878.06             | 1869.31            |
| A_68_P25169316 | chr7:69609111-69609155                            | NM_013788:264      | Peg12      | INSIDE                 | 0.648                                                        | 3.145                          | 973.29             | 3060.76            | 2.039                          | 897.40             | 1830.07            |
| A_68_P24956666 | chr7:6682979-6683023                              | NM_008817:130      | Peg3       | INSIDE                 | 0.45                                                         | 5.688                          | 2026.99            | 11529.03           | 2.56                           | 1672.44            | 4282.05            |
| A_68_P27635062 | chr11:20991838-20991882                           | NM_023324:534      | Peli1      | INSIDE                 | 0.382                                                        | 5.561                          | 1848.19            | 10277.19           | 2.126                          | 1499.58            | 3187.37            |
| A_68_P29585968 | chr14:48741266-48741310                           | NM_033602:745      | Peli2      | INSIDE                 | 0.57                                                         | 0.654                          | 1236.78            | 809.08             | 0.373                          | 1046.96            | 390.37             |
| A_68_P29585964 | chr14:48740853-48740897                           | NM_033602:331      | Peli2      | INSIDE                 | 0.319                                                        | 2.085                          | 4166.77            | 8686.10            | 0.665                          | 2809.61            | 1868.44            |
| A_68_P31926007 | chr19:4942924-4942968                             | NM_172835:146      | Peli3      | INSIDE                 | 0.385                                                        | 0.577                          | 7161.92            | 4135.20            | 0.222                          | 5433.61            | 1207.22            |
| A_68_P31926004 | chr19:4942668-4942712                             | NM_172835:402      | Peli3      | INSIDE                 | 0.505                                                        | 0.456                          | 2962.07            | 1351.60            | 0.231                          | 2142.21            | 494.05             |
| A_68_P29350211 | chr13:115880342-115880386                         | NM_134058:2        | Pelo       | INSIDE                 | 0.492                                                        | 3.792                          | 1722.47            | 6532.41            | 1.865                          | 1344.02            | 2505.99            |
| A_68_P27900566 | chr11:70223756-70223800                           | NM_029231:-245     | Pelp1      | PROMOTER               | 0.619                                                        | 0.307                          | 2775.70            | 851.51             | 0.19                           | 1948.56            | 370.09             |
| A_68_P27900563 | chr11:70223515-70223559                           | NM_029231:-3       | Pelp1      | PROMOTER               | 0.402                                                        | 0.687                          | 1378.84            | 947.46             | 0.276                          | 1043.92            | 288.21             |
| A_68_P27840490 | chr11:59859741-59859785                           | NM_008819:-9421    | Pen1       | PROMOTER               | 0.545                                                        | 0.476                          | 2154.54            | 1025.41            | 0.259                          | 1549.95            | 401.69             |
| A_68_P22696144 | chr4:4066014-4066058                              | NM_001002927:-444  | Penk       | PROMOTER               | 0.497                                                        | 11.460                         | 1986.64            | 22766.13           | 5.693                          | 1751.35            | 9969.61            |
| A_68_P25046335 | chr7:35697613-35697657                            | NM_008820:209      | Pepd       | INSIDE                 | 0.622                                                        | 2.561                          | 1639.47            | 4197.96            | 1.592                          | 1272.31            | 2025.65            |
| A_68_P20442663 | chr1:93355837-93355883                            | NM_011066:45       | Per2       | INSIDE                 | 0.503                                                        | 7.227                          | 5953.81            | 43025.53           | 3.638                          | 5029.32            | 18295.82           |
| A_68_P26977750 | chr10:18565037-18565081                           | NM_022032:182      | Perp       | INSIDE                 | 0.415                                                        | 11.293                         | 2649.31            | 29918.96           | 4.684                          | 2256.84            | 10570.54           |
| A_68_P26977748 | chr10:18564800-18564844                           | NM_022032:-54      | Perp       | PROMOTER               | 0.562                                                        | 9.320                          | 1025.94            | 9561.95            | 5.241                          | 876.84             | 4595.29            |
| A_68_P21706811 | chr2:144194639-144194683                          | NM_001164813:-58   | Pet117     | PROMOTER               | 0.474                                                        | 0.596                          | 820.72             | 489.33             | 0.283                          | 609.27             | 172.35             |
| A_68_P24815139 | chr6:124364839-124364883                          | NM_008995:225      | Pex5       | INSIDE                 | 0.578                                                        | 0.228                          | 5007.41            | 1139.56            | 0.132                          | 3661.63            | 481.76             |
| A_68_P31208519 | chr17:46848833-46848877                           | NM_145488:443      | Pex6       | INSIDE                 | 0.413                                                        | 6.793                          | 1065.32            | 7236.73            | 2.805                          | 917.93             | 2575.19            |
| A_68_P21853525 | chr2:170336931-170336975                          | NM_001110152:223   | Pfdn4      | INSIDE                 | 0.464                                                        | 0.257                          | 3568.54            | 916.20             | 0.119                          | 2660.15            | 317.22             |
| A_68_P21853526 | chr2:170337089-170337133                          | NM_001110152:381   | Pfdn4      | INSIDE                 | 0.593                                                        | 0.474                          | 5414.35            | 2564.64            | 0.281                          | 4067.13            | 1143.32            |
| A_68_P21006641 | chr2:11457093-11457137                            | NM_001177758:18442 | Pfkfb3     | INSIDE                 | 0.538                                                        | 3.518                          | 1839.73            | 6471.73            | 1.892                          | 1470.87            | 2782.16            |
| A_68_P21006733 | chr2:11475422-11475466                            | NM_001177758:112   | Pfkfb3     | INSIDE                 | 0.601                                                        | 0.549                          | 1055.19            | 579.03             | 0.33                           | 801.94             | 264.39             |
| A_68_P27271614 | chr10:77472403-77472447                           | NM_008826:117      | Pfkl       | INSIDE                 | 0.574                                                        | 0.419                          | 3071.53            | 1286.17            | 0.24                           | 2271.02            | 546.10             |
| A_68_P28803336 | chr13:6648044-6648088                             | NM_019703:-96      | Pfkp       | PROMOTER               | 0.44                                                         | 4.368                          | 1268.68            | 5541.50            | 1.922                          | 1057.06            | 2031.83            |



| ProbeName      | Target position of probe on CpG island microarray | TargetID            | GeneSymbol | CpG island Description | Ratio of relative methylation (TiO <sub>2</sub> -NP/Vehicle) | Sham group                     |                    |                    | TiO <sub>2</sub> -H group      |                    |                    |
|----------------|---------------------------------------------------|---------------------|------------|------------------------|--------------------------------------------------------------|--------------------------------|--------------------|--------------------|--------------------------------|--------------------|--------------------|
|                |                                                   |                     |            |                        |                                                              | Relative methylation (Cy5/Cy3) | Cy3 signal (Input) | Cy5 signal (MeDIP) | Relative methylation (Cy5/Cy3) | Cy3 signal (Input) | Cy5 signal (MeDIP) |
| A_68_P27901897 | chr11:70468130-70468174                           | NM_011072:0         | Pfn1       | INSIDE                 | 0.275                                                        | 43.491                         | 1949.71            | 84794.26           | 11.972                         | 2059.17            | 24652.77           |
| A_68_P27901890 | chr11:70467341-70467385                           | NM_011072:790       | Pfn1       | INSIDE                 | 0.351                                                        | 7.939                          | 1342.53            | 10657.78           | 2.788                          | 1279.59            | 3567.95            |
| A_68_P27901889 | chr11:70467270-70467315                           | NM_011072:860       | Pfn1       | INSIDE                 | 0.398                                                        | 0.387                          | 2469.92            | 956.93             | 0.154                          | 1833.26            | 282.98             |
| A_68_P27901895 | chr11:70467926-70467970                           | NM_011072:204       | Pfn1       | INSIDE                 | 0.585                                                        | 0.254                          | 3873.96            | 982.31             | 0.148                          | 2528.53            | 375.03             |
| A_68_P27901903 | chr11:70468945-70468989                           | NM_011072:-814      | Pfn1       | DIVERGENT_PROMOTER     | 0.39                                                         | 5.415                          | 651.92             | 3530.14            | 2.113                          | 565.44             | 1194.81            |
| A_68_P22165658 | chr3:57651977-57652021                            | NM_019410:-319      | Pfn2       | PROMOTER               | 0.579                                                        | 0.688                          | 2556.09            | 1758.37            | 0.398                          | 2078.55            | 827.45             |
| A_68_P32117861 | chr19:41986212-41986256                           | NM_023418:-126      | Pgam1      | PROMOTER               | 0.506                                                        | 4.623                          | 2453.59            | 11343.61           | 2.338                          | 2074.59            | 4851.02            |
| A_68_P32117863 | chr19:41986389-41986433                           | NM_023418:50        | Pgam1      | INSIDE                 | 0.648                                                        | 0.197                          | 2990.13            | 588.66             | 0.128                          | 2024.69            | 258.21             |
| A_68_P28056218 | chr11:98261638-98261682                           | NM_001033537:144    | Pgap3      | INSIDE                 | 0.387                                                        | 4.266                          | 1502.31            | 6409.04            | 1.65                           | 1208.58            | 1994.29            |
| A_68_P28872847 | chr13:21532533-21532577                           | NM_001162919:25     | Pgbd1      | INSIDE                 | 0.432                                                        | 0.552                          | 909.20             | 502.10             | 0.239                          | 747.14             | 178.41             |
| A_68_P26245549 | chr8:126958481-126958525                          | NM_171824:-666      | Pgbd5      | PROMOTER               | 0.655                                                        | 7.721                          | 1071.47            | 8272.96            | 5.057                          | 932.52             | 4715.60            |
| A_68_P31676054 | chr18:46440414-46440458                           | NM_172627:68        | Pggt1b     | INSIDE                 | 0.305                                                        | 7.501                          | 3190.02            | 23928.25           | 2.288                          | 2819.49            | 6449.70            |
| A_68_P25957670 | chr8:74115606-74115650                            | NM_025396:-454      | Pgls       | PROMOTER               | 0.147                                                        | 1.598                          | 5209.98            | 8324.02            | 0.235                          | 3612.54            | 850.33             |
| A_68_P25957707 | chr8:74119888-74119932                            | NM_025396:3828      | Pgls       | INSIDE                 | 0.352                                                        | 0.579                          | 1088.27            | 630.26             | 0.204                          | 883.31             | 180.27             |
| A_68_P23749120 | chr5:64484497-64484543                            | NM_025700:332       | Pgm1       | INSIDE                 | 0.311                                                        | 12.546                         | 2558.83            | 32102.38           | 3.896                          | 2308.76            | 8994.89            |
| A_68_P23146552 | chr4:99602526-99602570                            | NM_028132:493       | Pgm2       | INSIDE                 | 0.189                                                        | 26.464                         | 10392.97           | 275037.20          | 5.009                          | 8892.29            | 44538.52           |
| A_68_P23146551 | chr4:99602438-99602482                            | NM_028132:405       | Pgm2       | INSIDE                 | 0.491                                                        | 0.571                          | 5152.67            | 2940.60            | 0.28                           | 3804.95            | 1066.30            |
| A_68_P31097493 | chr17:24606963-24607007                           | NM_025954:-433      | Pgp        | PROMOTER               | 0.623                                                        | 15.399                         | 2600.81            | 40050.20           | 9.594                          | 2580.53            | 24757.08           |
| A_68_P25953245 | chr8:73183706-73183750                            | NM_023217:-148      | Pgpep1     | PROMOTER               | 0.517                                                        | 2.631                          | 8023.77            | 21113.74           | 1.361                          | 5522.16            | 7517.41            |
| A_68_P22083003 | chr3:40886734-40886778                            | NM_027558:212       | Pgrmc2     | INSIDE                 | 0.461                                                        | 7.849                          | 24393.22           | 191460.10          | 3.621                          | 18660.36           | 67572.34           |
| A_68_P28987052 | chr13:43011760-43011804                           | NM_001005740:206833 | Phactr1    | INSIDE                 | 0.431                                                        | 0.584                          | 2821.85            | 1647.06            | 0.252                          | 2106.93            | 529.95             |
| A_68_P28987053 | chr13:43011826-43011870                           | NM_001005740:206899 | Phactr1    | INSIDE                 | 0.452                                                        | 0.410                          | 1120.22            | 459.20             | 0.185                          | 912.89             | 168.98             |
| A_68_P26951409 | chr10:13193710-13193754                           | NM_001195065:470    | Phactr2    | INSIDE                 | 0.478                                                        | 0.149                          | 3501.68            | 520.93             | 0.071                          | 2434.43            | 173.28             |
| A_68_P26951412 | chr10:13194053-13194097                           | NM_001195065:128    | Phactr2    | INSIDE                 | 0.501                                                        | 3.394                          | 901.85             | 3060.54            | 1.699                          | 823.23             | 1398.79            |
| A_68_P26951410 | chr10:13193842-13193886                           | NM_001195065:338    | Phactr2    | INSIDE                 | 0.627                                                        | 0.578                          | 827.23             | 477.98             | 0.362                          | 628.28             | 227.51             |
| A_68_P21888793 | chr2:177877242-177877286                          | NM_028806:627       | Phactr3    | INSIDE                 | 0.252                                                        | 39.592                         | 1666.92            | 65997.16           | 9.961                          | 3068.04            | 30562.13           |
| A_68_P21888635 | chr2:177853739-177853783                          | NM_001177789:81     | Phactr3    | INSIDE                 | 0.394                                                        | 76.279                         | 1809.71            | 138043.50          | 30.024                         | 1774.78            | 53286.71           |
| A_68_P21888792 | chr2:177877156-177877200                          | NM_028806:541       | Phactr3    | INSIDE                 | 0.479                                                        | 4.708                          | 936.36             | 4408.66            | 2.256                          | 796.52             | 1797.12            |
| A_68_P24816531 | chr6:124662333-124662377                          | NM_007531:48        | Phb2       | INSIDE                 | 0.383                                                        | 0.440                          | 1287.71            | 567.04             | 0.169                          | 1026.66            | 173.00             |
| A_68_P23292757 | chr4:128404849-128404893                          | NM_001195083:56     | Phc2       | INSIDE                 | 0.486                                                        | 4.454                          | 590.17             | 2628.52            | 2.162                          | 575.56             | 1244.56            |
| A_68_P23292758 | chr4:128405111-128405155                          | NM_001195083:318    | Phc2       | INSIDE                 | 0.58                                                         | 3.647                          | 536.67             | 1957.41            | 2.116                          | 495.84             | 1048.97            |
| A_68_P22031102 | chr3:30868233-30868277                            | NM_001165954:83     | Phc3       | INSIDE                 | 0.349                                                        | 4.074                          | 2822.68            | 11499.68           | 1.421                          | 2373.31            | 3372.60            |
| A_68_P31113238 | chr17:27070074-27070118                           | NM_009343:25        | Phf1       | INSIDE                 | 0.653                                                        | 0.570                          | 1319.93            | 752.10             | 0.372                          | 1108.21            | 412.32             |
| A_68_P31062920 | chr17:15098814-15098858                           | NM_024250:-599      | Phf10      | PROMOTER               | 0.26                                                         | 0.598                          | 11698.05           | 6992.56            | 0.155                          | 8093.89            | 1255.59            |
| A_68_P23415887 | chr4:151369933-151369977                          | NM_172705:334       | Phf13      | INSIDE                 | 0.54                                                         | 3.908                          | 8796.02            | 34378.46           | 2.111                          | 7288.53            | 15384.85           |
| A_68_P27796195 | chr11:51671777-51671821                           | NM_199299:-815      | Phf15      | PROMOTER               | 0.223                                                        | 13.406                         | 10080.01           | 135127.60          | 2.993                          | 8945.15            | 26775.78           |
| A_68_P27796185 | chr11:51670574-51670621                           | NM_199299:386       | Phf15      | INSIDE                 | 0.461                                                        | 0.565                          | 1675.00            | 946.75             | 0.261                          | 1170.10            | 304.86             |
| A_68_P27796190 | chr11:51671242-51671287                           | NM_199299:-281      | Phf15      | PROMOTER               | 0.427                                                        | 5.765                          | 435.01             | 2507.71            | 2.463                          | 371.11             | 914.16             |
| A_68_P22085575 | chr3:41369640-41369684                            | NM_001130186:861    | Phf17      | INSIDE                 | 0.162                                                        | 32.989                         | 1447.85            | 47762.86           | 5.335                          | 1444.20            | 7704.69            |
| A_68_P22085568 | chr3:41368782-41368826                            | NM_001130186:3      | Phf17      | INSIDE                 | 0.498                                                        | 53.076                         | 2858.64            | 151724.80          | 26.427                         | 2735.21            | 72284.81           |
| A_68_P21130446 | chr2:34769487-34769531                            | NM_028716:-12       | Phf19      | PROMOTER               | 0.529                                                        | 10.232                         | 3741.33            | 38281.43           | 5.408                          | 3524.29            | 19059.40           |
| A_68_P30292508 | chr15:66409642-66409686                           | NM_001081409:531    | Phf201     | INSIDE                 | 0.447                                                        | 6.051                          | 1826.08            | 11049.52           | 2.706                          | 1440.84            | 3898.94            |
| A_68_P30292506 | chr15:66409382-66409426                           | NM_001081409:271    | Phf201     | INSIDE                 | 0.603                                                        | 3.870                          | 809.08             | 3131.53            | 2.333                          | 797.57             | 1860.91            |
| A_68_P30397291 | chr15:84684245-84684289                           | NM_001081166:2293   | Phf21b     | INSIDE                 | 0.393                                                        | 10.083                         | 2702.97            | 27253.92           | 3.965                          | 2534.32            | 10048.42           |
| A_68_P30397299 | chr15:84685568-84685612                           | NM_001081166:969    | Phf21b     | INSIDE                 | 0.574                                                        | 0.190                          | 2682.21            | 510.36             | 0.109                          | 1847.85            | 201.88             |
| A_68_P27898392 | chr11:69810209-69810253                           | NM_030064:958       | Phf23      | INSIDE                 | 0.166                                                        | 3.646                          | 10595.95           | 38634.62           | 0.607                          | 7472.55            | 4534.43            |

| ProbeName      | Target position of probe on CpG island microarray | TargetID           | GeneSymbol | CpG island Description | Ratio of relative methylation (TiO <sub>2</sub> -NP/Vehicle) | Sham group                     |                    |                    | TiO <sub>2</sub> -H group      |                    |                    |
|----------------|---------------------------------------------------|--------------------|------------|------------------------|--------------------------------------------------------------|--------------------------------|--------------------|--------------------|--------------------------------|--------------------|--------------------|
|                |                                                   |                    |            |                        |                                                              | Relative methylation (Cy5/Cy3) | Cy3 signal (Input) | Cy5 signal (MeDIP) | Relative methylation (Cy5/Cy3) | Cy3 signal (Input) | Cy5 signal (MeDIP) |
| A_68_P27898385 | chr11:69809540-69809584                           | NM_030064:290      | Phf23      | INSIDE                 | 0.197                                                        | 0.589                          | 3058.27            | 1800.92            | 0.116                          | 2147.57            | 249.46             |
| A_68_P27898388 | chr11:69809807-69809851                           | NM_030064:556      | Phf23      | INSIDE                 | 0.293                                                        | 0.297                          | 2805.74            | 834.42             | 0.087                          | 1998.34            | 174.11             |
| A_68_P27898391 | chr11:69810124-69810168                           | NM_030064:874      | Phf23      | INSIDE                 | 0.321                                                        | 18.097                         | 15139.65           | 273985.70          | 5.81                           | 11712.78           | 68056.12           |
| A_68_P27898395 | chr11:69810513-69810557                           | NM_030064:1262     | Phf23      | INSIDE                 | 0.357                                                        | 0.389                          | 3534.42            | 1375.80            | 0.139                          | 2540.93            | 352.63             |
| A_68_P27898394 | chr11:69810400-69810444                           | NM_030064:1150     | Phf23      | INSIDE                 | 0.382                                                        | 5.908                          | 5938.97            | 35087.35           | 2.255                          | 4440.29            | 10010.75           |
| A_68_P27898389 | chr11:69809872-69809916                           | NM_030064:622      | Phf23      | INSIDE                 | 0.443                                                        | 0.259                          | 2722.41            | 704.74             | 0.115                          | 2097.39            | 240.66             |
| A_68_P27898381 | chr11:69809079-69809123                           | NM_030064:-172     | Phf23      | PROMOTER               | 0.506                                                        | 3.304                          | 3768.24            | 12450.48           | 1.672                          | 3213.60            | 5373.05            |
| A_68_P27898384 | chr11:69809416-69809460                           | NM_030064:166      | Phf23      | INSIDE                 | 0.649                                                        | 0.584                          | 3824.57            | 2234.63            | 0.379                          | 2597.87            | 985.52             |
| A_68_P27898393 | chr11:69810295-69810339                           | NM_030064:1044     | Phf23      | INSIDE                 | 0.132                                                        | 1.594                          | 2742.91            | 4372.06            | 0.21                           | 1909.58            | 401.01             |
| A_68_P27898390 | chr11:69809983-69810027                           | NM_030064:732      | Phf23      | INSIDE                 | 0.495                                                        | 1.393                          | 2557.98            | 3563.32            | 0.69                           | 1847.74            | 1274.88            |
| A_68_P32384750 | chrX:50265645-50265689                            | NM_027642:224      | Phf6       | INSIDE                 | 0.543                                                        | 7.354                          | 346.85             | 2550.60            | 3.996                          | 488.01             | 1950.17            |
| A_68_P32745693 | chrX:147954890-147954934                          | NM_177201:-302     | Phf8       | PROMOTER               | 0.453                                                        | 3.238                          | 2293.83            | 7428.00            | 1.467                          | 2864.33            | 4203.35            |
| A_68_P27449326 | chr10:110943860-110943904                         | NM_009344:541      | Phlda1     | INSIDE                 | 0.429                                                        | 7.412                          | 603.25             | 4471.39            | 3.183                          | 574.10             | 1827.31            |
| A_68_P27449323 | chr10:110943535-110943582                         | NM_009344:217      | Phlda1     | INSIDE                 | 0.53                                                         | 3.948                          | 1452.27            | 5734.25            | 2.092                          | 1281.38            | 2681.02            |
| A_68_P25601380 | chr7:150688561-150688605                          | NM_009434:-153     | Phlda2     | PROMOTER               | 0.491                                                        | 0.545                          | 4073.59            | 2221.28            | 0.268                          | 2655.22            | 711.25             |
| A_68_P20641449 | chr1:137662705-137662749                          | NM_013750:65       | Phlda3     | INSIDE                 | 0.51                                                         | 7.135                          | 5182.48            | 36978.83           | 3.637                          | 4035.33            | 14675.46           |
| A_68_P20641447 | chr1:137662511-137662555                          | NM_013750:-129     | Phlda3     | PROMOTER               | 0.054                                                        | 10.328                         | 2142.23            | 22124.64           | 0.556                          | 1254.64            | 697.80             |
| A_68_P26469279 | chr9:44541771-44541815                            | NM_153537:1485     | Phldb1     | INSIDE                 | 0.184                                                        | 0.525                          | 3623.11            | 1903.46            | 0.097                          | 2489.64            | 240.50             |
| A_68_P26469100 | chr9:44516622-44516666                            | NM_153537:26633    | Phldb1     | INSIDE                 | 0.397                                                        | 73.524                         | 3381.87            | 248650.50          | 29.18                          | 3442.32            | 100446.30          |
| A_68_P26469197 | chr9:44529171-44529218                            | NM_153537:14083    | Phldb1     | INSIDE                 | 0.621                                                        | 0.529                          | 973.07             | 515.01             | 0.329                          | 808.66             | 265.78             |
| A_68_P25005873 | chr7:25413942-25413986                            | NM_001102613:17618 | Phldb3     | INSIDE                 | 0.479                                                        | 0.374                          | 3133.63            | 1171.30            | 0.179                          | 2198.51            | 394.03             |
| A_68_P20506808 | chr1:108069211-108069255                          | NM_133821:787      | Phlpp1     | INSIDE                 | 0.28                                                         | 25.154                         | 2021.30            | 50844.64           | 7.038                          | 1557.05            | 10958.65           |
| A_68_P20506810 | chr1:108069429-108069473                          | NM_133821:1005     | Phlpp1     | INSIDE                 | 0.388                                                        | 9.761                          | 2928.95            | 28589.68           | 3.783                          | 2302.71            | 8711.33            |
| A_68_P26159430 | chr8:112393252-112393296                          | NM_001122594:772   | Phlpp2     | INSIDE                 | 0.56                                                         | 0.580                          | 4581.39            | 2655.34            | 0.325                          | 3166.80            | 1028.60            |
| A_68_P26159425 | chr8:112392612-112392656                          | NM_001122594:132   | Phlpp2     | INSIDE                 | 0.65                                                         | 4.506                          | 1708.50            | 7697.70            | 2.931                          | 1297.91            | 3803.64            |
| A_68_P25375581 | chr7:108966881-108966925                          | NM_008887:76       | Phox2a     | INSIDE                 | 0.394                                                        | 0.374                          | 2951.61            | 1104.96            | 0.148                          | 2052.41            | 302.95             |
| A_68_P25375583 | chr7:108967177-108967221                          | NM_008887:372      | Phox2a     | INSIDE                 | 0.404                                                        | 11.603                         | 3414.21            | 39615.71           | 4.683                          | 3054.75            | 14304.46           |
| A_68_P25375611 | chr7:108970306-108970350                          | NM_008887:3502     | Phox2a     | INSIDE                 | 0.449                                                        | 4.530                          | 746.55             | 3381.92            | 2.034                          | 658.53             | 1339.49            |
| A_68_P23765940 | chr5:67488811-67488855                            | NM_008888:1533     | Phox2b     | INSIDE                 | 0.581                                                        | 0.609                          | 1772.38            | 1079.21            | 0.354                          | 1406.82            | 498.05             |
| A_68_P21073067 | chr2:25430182-25430226                            | NM_029293:187      | Phpt1      | INSIDE                 | 0.24                                                         | 15.582                         | 7003.56            | 109129.80          | 3.733                          | 6290.67            | 23480.70           |
| A_68_P25587734 | chr7:148445714-148445758                          | NM_001081118:31050 | Phrf1      | INSIDE                 | 0.391                                                        | 19.006                         | 1514.49            | 28783.80           | 7.433                          | 1034.04            | 7686.38            |
| A_68_P23523151 | chr5:20387300-20387344                            | NM_172992:620      | Phrf2      | INSIDE                 | 0.496                                                        | 4.429                          | 1376.17            | 6095.61            | 2.197                          | 1104.05            | 2425.63            |
| A_68_P23523156 | chr5:20387967-20388011                            | NM_172992:-46      | Phrf2      | DIVERGENT_PROMOTER     | 0.405                                                        | 5.191                          | 588.95             | 3057.11            | 2.1                            | 507.67             | 1066.03            |
| A_68_P27230702 | chr10:70061703-70061747                           | NM_001162846:-6164 | Phyhipl    | PROMOTER               | 0.305                                                        | 11.273                         | 2285.06            | 25759.85           | 3.444                          | 1801.89            | 6205.21            |
| A_68_P27230709 | chr10:70062556-70062600                           | NM_178621:-539     | Phyhipl    | PROMOTER               | 0.523                                                        | 4.632                          | 472.95             | 2190.91            | 2.422                          | 457.03             | 1106.79            |
| A_68_P27230712 | chr10:70062823-70062867                           | NM_178621:-805     | Phyhipl    | PROMOTER               | 0.574                                                        | 2.851                          | 1186.63            | 3383.60            | 1.637                          | 973.79             | 1593.85            |
| A_68_P32118991 | chr19:42165475-42165519                           | NM_145501:572      | Pi4k2a     | INSIDE                 | 0.64                                                         | 0.379                          | 3153.55            | 1195.75            | 0.243                          | 2187.46            | 531.14             |
| A_68_P32118987 | chr19:42164891-42164935                           | NM_145501:-12      | Pi4k2a     | DIVERGENT_PROMOTER     | 0.538                                                        | 2.963                          | 1531.45            | 4538.41            | 1.596                          | 1148.55            | 1832.87            |
| A_68_P23696524 | chr5:53132760-53132804                            | NM_025951:-30      | Pi4k2b     | PROMOTER               | 0.282                                                        | 1.585                          | 1937.20            | 3070.64            | 0.446                          | 1775.82            | 792.78             |
| A_68_P26573394 | chr9:62827923-62827967                            | NM_019663:742      | Pias1      | INSIDE                 | 0.586                                                        | 0.302                          | 6982.96            | 2107.82            | 0.177                          | 4611.90            | 816.42             |
| A_68_P26573399 | chr9:62828500-62828544                            | NM_019663:164      | Pias1      | INSIDE                 | 0.573                                                        | 2.403                          | 2503.33            | 6015.92            | 1.376                          | 2286.68            | 3147.15            |
| A_68_P27287761 | chr10:80616838-80616882                           | NM_021501:13605    | Pias4      | INSIDE                 | 0.155                                                        | 15.406                         | 2458.38            | 37874.14           | 2.392                          | 1900.87            | 4547.52            |
| A_68_P27287760 | chr10:80616735-80616779                           | NM_021501:13709    | Pias4      | INSIDE                 | 0.386                                                        | 8.332                          | 1631.33            | 13592.50           | 3.22                           | 1375.50            | 4428.64            |
| A_68_P27287763 | chr10:80617060-80617104                           | NM_021501:13383    | Pias4      | INSIDE                 | 0.468                                                        | 8.197                          | 1124.44            | 9217.45            | 3.837                          | 968.35             | 3715.98            |
| A_68_P27287757 | chr10:80616441-80616485                           | NM_021501:14003    | Pias4      | DOWNSTREAM             | 0.116                                                        | 13.429                         | 6725.42            | 90318.46           | 1.562                          | 4762.57            | 7436.99            |
| A_68_P27287756 | chr10:80616365-80616414                           | NM_021501:14076    | Pias4      | DOWNSTREAM             | 0.507                                                        | 3.757                          | 948.09             | 3562.29            | 1.903                          | 566.60             | 1078.44            |

| ProbeName      | Target position of probe on CpG island microarray | TargetID          | GeneSymbol | CpG island Description | Ratio of relative methylation (TiO <sub>2</sub> -NP/Vehicle) | Sham group                     |                    |                    | TiO <sub>2</sub> -H group      |                    |                    |
|----------------|---------------------------------------------------|-------------------|------------|------------------------|--------------------------------------------------------------|--------------------------------|--------------------|--------------------|--------------------------------|--------------------|--------------------|
|                |                                                   |                   |            |                        |                                                              | Relative methylation (Cy5/Cy3) | Cy3 signal (Input) | Cy5 signal (MeDIP) | Relative methylation (Cy5/Cy3) | Cy3 signal (Input) | Cy5 signal (MeDIP) |
| A_68_P32798239 | chrX:160857687-160857731                          | NM_011081:-10     | Piga       | PROMOTER               | 0.431                                                        | 5.858                          | 1300.25            | 7616.29            | 2.524                          | 1556.34            | 3928.43            |
| A_68_P20774854 | chr1:163899508-163899552                          | NM_001039045:212  | Pigc       | INSIDE                 | 0.588                                                        | 3.344                          | 1227.56            | 4105.14            | 1.965                          | 1053.54            | 2070.55            |
| A_68_P31420721 | chr17:87424605-87424649                           | NM_008838:115     | Pigf       | INSIDE                 | 0.66                                                         | 3.124                          | 1113.55            | 3478.42            | 2.06                           | 893.77             | 1841.43            |
| A_68_P28567643 | chr12:80190635-80190679                           | NM_029988:1       | Pigh       | INSIDE                 | 0.641                                                        | 0.646                          | 1502.42            | 969.96             | 0.414                          | 1253.38            | 519.04             |
| A_68_P20832749 | chr1:174307088-174307133                          | NM_026234:449     | Pigm       | INSIDE                 | 0.317                                                        | 0.265                          | 3326.17            | 882.85             | 0.084                          | 2135.28            | 179.66             |
| A_68_P20832748 | chr1:174307013-174307057                          | NM_026234:373     | Pigm       | INSIDE                 | 0.608                                                        | 0.488                          | 1963.27            | 958.54             | 0.297                          | 1414.72            | 420.11             |
| A_68_P30980968 | chr16:94592282-94592326                           | NM_001159618:-147 | Pigp       | PROMOTER               | 0.609                                                        | 4.669                          | 2584.85            | 12067.39           | 2.843                          | 2308.31            | 6562.89            |
| A_68_P30980976 | chr16:94593244-94593288                           | NM_001159617:-644 | Pigp       | PROMOTER               | 0.37                                                         | 0.730                          | 1827.64            | 1334.79            | 0.27                           | 1500.91            | 405.57             |
| A_68_P27942686 | chr11:78142057-78142101                           | NM_201406:155     | Pigs       | INSIDE                 | 0.46                                                         | 4.073                          | 3766.39            | 15341.33           | 1.872                          | 2984.95            | 5587.69            |
| A_68_P21818281 | chr2:164332907-164332953                          | NM_133779:9906    | Pigt       | INSIDE                 | 0.291                                                        | 7.655                          | 1300.80            | 9957.93            | 2.23                           | 852.47             | 1900.93            |
| A_68_P21818280 | chr2:164332796-164332840                          | NM_133779:9794    | Pigt       | INSIDE                 | 0.486                                                        | 4.371                          | 1306.84            | 5712.28            | 2.124                          | 860.11             | 1827.18            |
| A_68_P21818223 | chr2:164322720-164322769                          | NM_133779:-280    | Pigt       | PROMOTER               | 0.51                                                         | 0.523                          | 913.94             | 477.82             | 0.266                          | 684.91             | 182.51             |
| A_68_P23318794 | chr4:133228762-133228806                          | NM_001145955:-222 | Pigv       | PROMOTER               | 0.409                                                        | 4.087                          | 1347.24            | 5506.32            | 1.671                          | 1219.68            | 2038.54            |
| A_68_P27980117 | chr11:84693941-84693985                           | NM_001077636:-175 | Pigw       | PROMOTER               | 0.182                                                        | 52.694                         | 3882.16            | 204565.50          | 9.569                          | 5945.42            | 56891.86           |
| A_68_P24479719 | chr6:57641697-57641742                            | NM_025574:353     | Pigy       | INSIDE                 | 0.335                                                        | 5.793                          | 2023.36            | 11722.28           | 1.941                          | 1631.97            | 3167.70            |
| A_68_P26350663 | chr9:21961255-21961299                            | NM_001082532:-13  | Pigy1      | PROMOTER               | 0.227                                                        | 8.448                          | 1232.58            | 10412.78           | 1.921                          | 1041.97            | 2001.87            |
| A_68_P30650136 | chr16:31933025-31933069                           | NM_172822:-890    | Pigz       | PROMOTER               | 0.504                                                        | 0.265                          | 1767.81            | 469.31             | 0.134                          | 1277.62            | 171.04             |
| A_68_P25091451 | chr7:52409634-52409678                            | NM_029406:-111    | Pih1d1     | PROMOTER               | 0.564                                                        | 4.063                          | 1762.43            | 7160.94            | 2.29                           | 1312.38            | 3005.86            |
| A_68_P32114803 | chr19:41459691-41459735                           | NM_031376:-152    | Pik3ap1    | PROMOTER               | 0.482                                                        | 4.671                          | 2613.57            | 12207.69           | 2.251                          | 2091.72            | 4708.47            |
| A_68_P25448125 | chr7:123586995-123587039                          | NM_011083:-44     | Pik3c2a    | PROMOTER               | 0.235                                                        | 0.240                          | 4514.05            | 1082.78            | 0.056                          | 3029.76            | 171.09             |
| A_68_P20625254 | chr1:134942880-134942924                          | NM_001099276:314  | Pik3c2b    | INSIDE                 | 0.505                                                        | 3.674                          | 1150.08            | 4225.12            | 1.855                          | 918.94             | 1704.23            |
| A_68_P20625253 | chr1:134942691-134942735                          | NM_001099276:124  | Pik3c2b    | INSIDE                 | 0.499                                                        | 3.555                          | 1048.91            | 3728.65            | 1.774                          | 990.83             | 1757.69            |
| A_68_P31592065 | chr18:30432515-30432561                           | NM_181414:-11     | Pik3c3     | PROMOTER               | 0.13                                                         | 2.891                          | 3678.52            | 10635.71           | 0.375                          | 2394.20            | 898.98             |
| A_68_P26762516 | chr9:99040770-99040814                            | NM_029094:-162    | Pik3cb     | PROMOTER               | 0.327                                                        | 6.431                          | 1655.42            | 10645.47           | 2.105                          | 1483.05            | 3122.47            |
| A_68_P23401742 | chr4:149029621-149029665                          | NM_001164052:7783 | Pik3cd     | INSIDE                 | 0.434                                                        | 4.739                          | 3227.30            | 15295.16           | 2.056                          | 2465.50            | 5070.21            |
| A_68_P27551374 | chr11:3232269-3232313                             | NM_178149:1557    | Pik3ip1    | INSIDE                 | 0.494                                                        | 4.064                          | 979.65             | 3981.59            | 2.006                          | 788.31             | 1581.22            |
| A_68_P29275481 | chr13:102538276-102538320                         | NM_001077495:-126 | Pik3r1     | PROMOTER               | 0.486                                                        | 0.162                          | 2915.65            | 473.13             | 0.079                          | 2192.26            | 172.99             |
| A_68_P25953980 | chr8:73300616-73300660                            | NM_008841:-27     | Pik3r2     | DIVERGENT_PROMOTER     | 0.278                                                        | 12.436                         | 809.26             | 10064.22           | 3.457                          | 697.19             | 2409.90            |
| A_68_P26798484 | chr9:105547053-105547097                          | NM_001081309:1750 | Pik3r4     | INSIDE                 | 0.441                                                        | 3.849                          | 1959.10            | 7541.47            | 1.699                          | 1184.01            | 2011.58            |
| A_68_P26798485 | chr9:105547166-105547210                          | NM_001081309:1864 | Pik3r4     | INSIDE                 | 0.542                                                        | 2.535                          | 3190.76            | 8088.27            | 1.373                          | 2134.77            | 2931.10            |
| A_68_P31128230 | chr17:29627256-29627303                           | NM_008842:-710    | Pim1       | PROMOTER               | 0.017                                                        | 5.145                          | 2572.23            | 13234.98           | 0.088                          | 2009.63            | 177.35             |
| A_68_P31128229 | chr17:29627153-29627197                           | NM_008842:-815    | Pim1       | PROMOTER               | 0.277                                                        | 0.316                          | 7599.60            | 2398.95            | 0.087                          | 4856.63            | 424.95             |
| A_68_P31128228 | chr17:29627044-29627088                           | NM_008842:-923    | Pim1       | PROMOTER               | 0.412                                                        | 0.454                          | 4485.02            | 2035.29            | 0.187                          | 3117.04            | 582.07             |
| A_68_P31128240 | chr17:29628771-29628815                           | NM_008842:803     | Pim1       | INSIDE                 | 0.466                                                        | 0.584                          | 821.26             | 479.34             | 0.272                          | 637.33             | 173.27             |
| A_68_P30421719 | chr15:88693018-88693062                           | NM_145478:417     | Pim3       | INSIDE                 | 0.501                                                        | 8.591                          | 786.51             | 6756.88            | 4.305                          | 654.69             | 2818.36            |
| A_68_P23345204 | chr4:137881562-137881606                          | NM_026880:627     | Pink1      | INSIDE                 | 0.574                                                        | 0.694                          | 5665.38            | 3931.78            | 0.398                          | 3962.70            | 1577.34            |
| A_68_P29664074 | chr14:64479020-64479064                           | NM_028228:-106    | Pinx1      | PROMOTER               | 0.5                                                          | 6.036                          | 3060.25            | 18470.54           | 3.017                          | 2680.70            | 8087.83            |
| A_68_P23524646 | chr5:20692316-20692360                            | NM_175437:254     | Pion       | INSIDE                 | 0.377                                                        | 0.400                          | 1359.36            | 543.83             | 0.151                          | 1145.88            | 173.00             |
| A_68_P27534649 | chr10:126648747-126648791                         | NM_054097:-90     | Pip4k2c    | PROMOTER               | 0.576                                                        | 3.113                          | 2201.33            | 6853.29            | 1.792                          | 1793.56            | 3213.90            |
| A_68_P32024327 | chr19:24630294-24630338                           | NM_008846:1       | Pip5k1b    | INSIDE                 | 0.436                                                        | 0.554                          | 3788.76            | 2100.33            | 0.242                          | 2822.06            | 682.18             |
| A_68_P27288654 | chr10:80756115-80756159                           | NM_001146687:420  | Pip5k1c    | INSIDE                 | 0.631                                                        | 0.389                          | 1273.69            | 495.97             | 0.246                          | 1052.36            | 258.67             |
| A_68_P31003040 | chr17:3084893-3084937                             | NR_003519:-731    | Pisd-ps2   | PROMOTER               | 0.137                                                        | 57.380                         | 9688.39            | 555915.20          | 7.842                          | 14183.87           | 111235.30          |
| A_68_P27926998 | chr11:75401820-75401864                           | NM_008850:233     | Pitpna     | INSIDE                 | 0.214                                                        | 0.720                          | 1377.59            | 991.45             | 0.154                          | 1138.10            | 175.25             |
| A_68_P23985067 | chr5:111759832-111759876                          | NM_019640:72      | Pitpnb     | INSIDE                 | 0.39                                                         | 0.507                          | 2976.19            | 1509.07            | 0.198                          | 2108.94            | 416.52             |
| A_68_P23985069 | chr5:111760075-111760119                          | NM_019640:314     | Pitpnb     | INSIDE                 | 0.642                                                        | 4.396                          | 1669.73            | 7339.69            | 2.82                           | 1430.10            | 4033.06            |
| A_68_P28107262 | chr11:107332069-107332113                         | NM_145823:-56     | Pitpnc1    | DIVERGENT_PROMOTER     | 0.175                                                        | 52.747                         | 1881.36            | 99235.72           | 9.221                          | 1811.77            | 16705.94           |

| ProbeName      | Target position of probe on CpG island microarray | TargetID           | GeneSymbol | CpG island Description | Ratio of relative methylation (TiO <sub>2</sub> -NP/Vehicle) | Sham group                     |                    |                    | TiO <sub>2</sub> -H group      |                    |                    |
|----------------|---------------------------------------------------|--------------------|------------|------------------------|--------------------------------------------------------------|--------------------------------|--------------------|--------------------|--------------------------------|--------------------|--------------------|
|                |                                                   |                    |            |                        |                                                              | Relative methylation (Cy5/Cy3) | Cy3 signal (Input) | Cy5 signal (MeDIP) | Relative methylation (Cy5/Cy3) | Cy3 signal (Input) | Cy5 signal (MeDIP) |
| A_68_P28107247 | chr11:107330576-107330620                         | NM_145823:1436     | Pitpnc1    | INSIDE                 | 0.255                                                        | 8.952                          | 1767.68            | 15823.68           | 2.287                          | 1446.65            | 3307.90            |
| A_68_P31921046 | chr19:4100132-4100176                             | NM_008851:-467     | Pitpnm1    | PROMOTER               | 0.476                                                        | 0.502                          | 1677.53            | 841.80             | 0.239                          | 1305.95            | 311.77             |
| A_68_P31921054 | chr19:4101079-4101123                             | NM_008851:479      | Pitpnm1    | INSIDE                 | 0.638                                                        | 5.453                          | 924.78             | 5042.96            | 3.482                          | 713.35             | 2483.59            |
| A_68_P31921047 | chr19:4100251-4100295                             | NM_008851:-349     | Pitpnm1    | PROMOTER               | 0.603                                                        | 0.721                          | 2728.58            | 1967.89            | 0.435                          | 1824.77            | 793.86             |
| A_68_P29057249 | chr13:55926961-55927005                           | NM_011097:5804     | Pitx1      | INSIDE                 | 0.351                                                        | 0.348                          | 1992.95            | 693.84             | 0.122                          | 1424.16            | 173.83             |
| A_68_P29057257 | chr13:55927883-55927927                           | NM_011097:4882     | Pitx1      | INSIDE                 | 0.639                                                        | 0.329                          | 1995.88            | 655.69             | 0.21                           | 1477.08            | 310.31             |
| A_68_P29057339 | chr13:55937443-55937487                           | NM_011097:-4678    | Pitx1      | PROMOTER               | 0.66                                                         | 0.388                          | 1354.13            | 525.04             | 0.256                          | 1033.48            | 264.53             |
| A_68_P29057258 | chr13:55927956-55928000                           | NM_011097:4808     | Pitx1      | INSIDE                 | 0.59                                                         | 0.529                          | 843.86             | 446.64             | 0.312                          | 604.44             | 188.71             |
| A_68_P22518659 | chr3:128907292-128907336                          | NM_001042502:-9540 | Pitx2      | PROMOTER               | 0.505                                                        | 6.243                          | 1767.20            | 11032.23           | 3.151                          | 1538.06            | 4846.81            |
| A_68_P22518617 | chr3:128902587-128902631                          | NM_011098:-227     | Pitx2      | PROMOTER               | 0.514                                                        | 0.483                          | 2337.83            | 1129.65            | 0.248                          | 1736.43            | 431.21             |
| A_68_P32555655 | chrX:96666023-96666067                            | NM_001083110:30    | Pja1       | INSIDE                 | 0.273                                                        | 7.102                          | 1277.35            | 9071.57            | 1.937                          | 1523.97            | 2952.02            |
| A_68_P31295068 | chr17:64681131-64681175                           | NM_001025309:71    | Pja2       | INSIDE                 | 0.375                                                        | 0.350                          | 3014.25            | 1054.52            | 0.131                          | 2325.24            | 304.75             |
| A_68_P23952342 | chr5:104888645-104888689                          | NM_008861:191      | Pkd2       | INSIDE                 | 0.549                                                        | 4.715                          | 1537.23            | 7247.83            | 2.588                          | 1339.06            | 3465.07            |
| A_68_P31612701 | chr18:34569089-34569133                           | NM_001163004:34    | Pkd2l2     | INSIDE                 | 0.636                                                        | 0.328                          | 1527.22            | 500.57             | 0.208                          | 1191.08            | 248.16             |
| A_68_P31612702 | chr18:34569207-34569251                           | NM_001163004:152   | Pkd2l2     | INSIDE                 | 0.424                                                        | 0.604                          | 837.07             | 505.44             | 0.256                          | 701.65             | 179.51             |
| A_68_P31397730 | chr17:83614079-83614123                           | NM_134117:-522     | Pkdcc      | PROMOTER               | 0.49                                                         | 0.728                          | 3730.04            | 2714.20            | 0.357                          | 2980.81            | 1063.09            |
| A_68_P31397731 | chr17:83614185-83614229                           | NM_134117:-416     | Pkdcc      | PROMOTER               | 0.499                                                        | 1.341                          | 6543.80            | 8772.55            | 0.668                          | 5063.68            | 3384.43            |
| A_68_P31093271 | chr17:23863763-23863807                           | NM_023058:482      | Pkmyt1     | INSIDE                 | 0.574                                                        | 0.229                          | 3527.72            | 806.86             | 0.131                          | 2574.35            | 338.09             |
| A_68_P22593186 | chr3:142544706-142544750                          | NM_178654:240      | Pkn2       | INSIDE                 | 0.521                                                        | 0.520                          | 2269.16            | 1179.81            | 0.271                          | 1875.39            | 507.86             |
| A_68_P22593188 | chr3:142544925-142544969                          | NM_178654:22       | Pkn2       | INSIDE                 | 0.616                                                        | 4.019                          | 508.48             | 2043.65            | 2.477                          | 451.95             | 1119.41            |
| A_68_P31140479 | chr17:31701231-31701275                           | NM_016670:-465     | Pknox1     | PROMOTER               | 0.498                                                        | 0.370                          | 1268.12            | 468.71             | 0.184                          | 937.33             | 172.50             |
| A_68_P31140482 | chr17:31701718-31701762                           | NM_016670:23       | Pknox1     | INSIDE                 | 0.55                                                         | 4.512                          | 1511.54            | 6820.34            | 2.481                          | 1242.28            | 3081.84            |
| A_68_P31140484 | chr17:31702098-31702142                           | NM_016670:403      | Pknox1     | INSIDE                 | 0.631                                                        | 3.692                          | 1076.92            | 3975.86            | 2.33                           | 878.13             | 2046.47            |
| A_68_P26429021 | chr9:36954305-36954349                            | NM_001029838:525   | Pknox2     | INSIDE                 | 0.503                                                        | 7.486                          | 1016.38            | 7608.18            | 3.763                          | 1083.61            | 4077.45            |
| A_68_P26429019 | chr9:36953992-36954036                            | NM_001029838:837   | Pknox2     | INSIDE                 | 0.418                                                        | 1.501                          | 2262.45            | 3396.24            | 0.627                          | 1680.96            | 1054.33            |
| A_68_P20642551 | chr1:137815771-137815815                          | NM_019645:-191     | Pkp1       | PROMOTER               | 0.441                                                        | 5.454                          | 2399.13            | 13085.60           | 2.406                          | 1921.63            | 4624.38            |
| A_68_P20642552 | chr1:137815854-137815898                          | NM_019645:-275     | Pkp1       | PROMOTER               | 0.558                                                        | 0.457                          | 2336.80            | 1067.53            | 0.255                          | 1820.21            | 463.99             |
| A_68_P30568393 | chr16:16213292-16213336                           | NM_026163:-123     | Pkp2       | PROMOTER               | 0.189                                                        | 9.630                          | 1159.20            | 11162.65           | 1.817                          | 1196.20            | 2172.95            |
| A_68_P21250388 | chr2:58999667-58999711                            | NM_026361:782      | Pkp4       | INSIDE                 | 0.214                                                        | 35.035                         | 2268.46            | 79475.51           | 7.494                          | 2024.24            | 15168.80           |
| A_68_P21250385 | chr2:58999390-58999434                            | NM_026361:506      | Pkp4       | INSIDE                 | 0.499                                                        | 10.276                         | 3508.04            | 36048.67           | 5.125                          | 3278.06            | 16798.53           |
| A_68_P21250386 | chr2:58999473-58999517                            | NM_026361:588      | Pkp4       | INSIDE                 | 0.59                                                         | 3.497                          | 1547.70            | 5413.03            | 2.064                          | 1509.30            | 3114.86            |
| A_68_P22522614 | chr3:129581824-129581868                          | NM_183423:-2255    | Pla2g12a   | PROMOTER               | 0.239                                                        | 1.752                          | 4134.24            | 7242.39            | 0.418                          | 3080.98            | 1289.25            |
| A_68_P22522616 | chr3:129582033-129582077                          | NM_183423:-2047    | Pla2g12a   | PROMOTER               | 0.471                                                        | 6.890                          | 10442.24           | 71949.27           | 3.243                          | 8042.95            | 26085.59           |
| A_68_P26138002 | chr8:108674112-108674156                          | NM_133792:-164     | Pla2g15    | PROMOTER               | 0.31                                                         | 0.569                          | 4762.86            | 2709.43            | 0.176                          | 3213.56            | 566.51             |
| A_68_P30365773 | chr15:79158644-79158688                           | NM_001199023:135   | Pla2g6     | INSIDE                 | 0.452                                                        | 0.221                          | 4905.22            | 1081.93            | 0.1                            | 3732.77            | 371.90             |
| A_68_P29480407 | chr14:26722558-26722602                           | NM_207229:-201     | Plac9      | PROMOTER               | 0.639                                                        | 0.250                          | 8892.07            | 2225.30            | 0.16                           | 6775.33            | 1084.23            |
| A_68_P29480406 | chr14:26722448-26722492                           | NM_207229:-91      | Plac9      | PROMOTER               | 0.374                                                        | 0.640                          | 3597.92            | 2301.93            | 0.239                          | 2828.77            | 676.60             |
| A_68_P22695183 | chr4:3864597-3864641                              | NM_019969:934      | Plag1      | INSIDE                 | 0.356                                                        | 1.953                          | 2583.12            | 5044.34            | 0.695                          | 2078.55            | 1445.00            |
| A_68_P26949005 | chr10:12810608-12810652                           | NM_009538:37       | Plagl1     | INSIDE                 | 0.265                                                        | 18.094                         | 959.03             | 17352.27           | 4.791                          | 1216.96            | 5830.91            |
| A_68_P26949004 | chr10:12810446-12810490                           | NM_009538:-125     | Plagl1     | PROMOTER               | 0.416                                                        | 5.980                          | 694.78             | 4154.71            | 2.488                          | 617.15             | 1535.17            |
| A_68_P21753788 | chr2:153067075-153067119                          | NM_018807:-2       | Plagl2     | DIVERGENT_PROMOTER     | 0.524                                                        | 10.564                         | 1539.62            | 16264.83           | 5.538                          | 1350.43            | 7478.49            |
| A_68_P24039106 | chr5:120953388-120953432                          | NM_023625:222      | Plbd2      | INSIDE                 | 0.511                                                        | 8.777                          | 920.64             | 8080.82            | 4.485                          | 807.62             | 3622.16            |
| A_68_P21652760 | chr2:134611895-134611939                          | NM_001145830:17    | Plcb1      | INSIDE                 | 0.563                                                        | 0.423                          | 1380.01            | 583.66             | 0.238                          | 1137.35            | 270.68             |
| A_68_P21565686 | chr2:118537255-118537299                          | NM_177568:16898    | Plcb2      | INSIDE                 | 0.54                                                         | 0.635                          | 1015.65            | 644.52             | 0.343                          | 807.57             | 276.76             |
| A_68_P28083319 | chr11:102962554-102962598                         | NM_152813:396      | Plcd3      | INSIDE                 | 0.642                                                        | 0.394                          | 2909.55            | 1147.04            | 0.253                          | 2109.40            | 533.53             |
| A_68_P28083321 | chr11:102962810-102962854                         | NM_152813:140      | Plcd3      | INSIDE                 | 0.647                                                        | 2.388                          | 1137.71            | 2717.33            | 1.545                          | 1007.27            | 1556.26            |

| ProbeName      | Target position of probe on CpG island microarray | TargetID           | GeneSymbol | CpG island Description | Ratio of relative methylation (TiO <sub>2</sub> -NP/Vehicle) | Sham group                     |                    |                    | TiO <sub>2</sub> -H group      |                    |                    |
|----------------|---------------------------------------------------|--------------------|------------|------------------------|--------------------------------------------------------------|--------------------------------|--------------------|--------------------|--------------------------------|--------------------|--------------------|
|                |                                                   |                    |            |                        |                                                              | Relative methylation (Cy5/Cy3) | Cy3 signal (Input) | Cy5 signal (MeDIP) | Relative methylation (Cy5/Cy3) | Cy3 signal (Input) | Cy5 signal (MeDIP) |
| A_68_P21796699 | chr2:160557598-160557642                          | NM_021280:575      | Pleg1      | INSIDE                 | 0.427                                                        | 5.062                          | 608.93             | 3082.17            | 2.161                          | 568.33             | 1227.93            |
| A_68_P26203094 | chr8:120022462-120022506                          | NM_172285:294      | Pleg2      | INSIDE                 | 0.485                                                        | 5.523                          | 847.34             | 4679.43            | 2.677                          | 701.15             | 1877.05            |
| A_68_P30729955 | chr16:46010463-46010507                           | NM_001134480:42    | Plcx2      | INSIDE                 | 0.469                                                        | 7.767                          | 669.95             | 5203.46            | 3.641                          | 669.50             | 2437.72            |
| A_68_P20852908 | chr1:178205507-178205551                          | NM_176916:-85      | Pld5       | PROMOTER               | 0.664                                                        | 0.437                          | 1870.98            | 817.69             | 0.29                           | 1543.03            | 447.49             |
| A_68_P21587817 | chr2:122564114-122564158                          | NM_019788:-104     | Pldn       | PROMOTER               | 0.551                                                        | 8.335                          | 1421.46            | 11848.38           | 4.592                          | 1198.23            | 5502.68            |
| A_68_P30346633 | chr15:76014154-76014198                           | NM_201394:11964    | Plec       | INSIDE                 | 0.226                                                        | 11.748                         | 2053.12            | 24120.89           | 2.659                          | 1509.41            | 4013.61            |
| A_68_P30346604 | chr15:76010482-76010526                           | NM_201394:15636    | Plec       | INSIDE                 | 0.339                                                        | 10.277                         | 1640.52            | 16860.15           | 3.484                          | 1272.05            | 4431.79            |
| A_68_P30346980 | chr15:76063274-76063318                           | NM_001163542:-1488 | Plec       | PROMOTER               | 0.414                                                        | 0.219                          | 3853.54            | 844.42             | 0.091                          | 2792.91            | 253.13             |
| A_68_P30346610 | chr15:76011282-76011326                           | NM_201394:14836    | Plec       | INSIDE                 | 0.468                                                        | 9.111                          | 2790.03            | 25420.21           | 4.266                          | 2443.19            | 10422.82           |
| A_68_P30346599 | chr15:76009927-76009971                           | NM_201394:16192    | Plec       | INSIDE                 | 0.497                                                        | 8.843                          | 1956.77            | 17303.72           | 4.392                          | 1633.83            | 7175.34            |
| A_68_P30346762 | chr15:76028710-76028754                           | NM_201393:-93      | Plec       | PROMOTER               | 0.503                                                        | 5.923                          | 2450.91            | 14516.94           | 2.978                          | 1891.93            | 5634.95            |
| A_68_P30346619 | chr15:76012289-76012333                           | NM_201394:13830    | Plec       | INSIDE                 | 0.513                                                        | 10.738                         | 1434.37            | 15402.07           | 5.506                          | 1159.68            | 6385.55            |
| A_68_P30346603 | chr15:76010310-76010354                           | NM_201394:15808    | Plec       | INSIDE                 | 0.543                                                        | 4.905                          | 961.49             | 4716.08            | 2.662                          | 807.41             | 2149.71            |
| A_68_P30346634 | chr15:76014247-76014291                           | NM_201394:11872    | Plec       | INSIDE                 | 0.604                                                        | 4.067                          | 926.44             | 3768.10            | 2.455                          | 746.46             | 1832.64            |
| A_68_P30346596 | chr15:76009591-76009635                           | NM_201394:16528    | Plec       | INSIDE                 | 0.63                                                         | 4.703                          | 609.73             | 2867.45            | 2.964                          | 445.53             | 1320.38            |
| A_68_P30346760 | chr15:76028479-76028523                           | NM_201394:-2360    | Plec       | PROMOTER               | 0.65                                                         | 0.613                          | 1237.98            | 759.18             | 0.399                          | 1012.30            | 403.55             |
| A_68_P28566637 | chr12:80012969-80013013                           | NM_013738:-5065    | Plek2      | PROMOTER               | 0.447                                                        | 4.278                          | 3387.80            | 14494.01           | 1.913                          | 2498.63            | 4779.52            |
| A_68_P28566598 | chr12:80007781-80007825                           | NM_013738:123      | Plek2      | INSIDE                 | 0.626                                                        | 0.459                          | 1555.93            | 713.42             | 0.287                          | 1208.20            | 346.60             |
| A_68_P28566640 | chr12:80013209-80013253                           | NM_013738:-5305    | Plek2      | PROMOTER               | 0.629                                                        | 2.541                          | 2776.88            | 7056.32            | 1.599                          | 2231.34            | 3566.86            |
| A_68_P24894485 | chr6:140373203-140373247                          | NM_144920:605      | Plekha5    | INSIDE                 | 0.497                                                        | 3.844                          | 4497.33            | 17289.78           | 1.909                          | 3516.52            | 6712.97            |
| A_68_P22727584 | chr4:10935394-10935438                            | NM_175175:-650     | Plekhh2    | PROMOTER               | 0.574                                                        | 5.750                          | 2712.79            | 15598.02           | 3.298                          | 2277.95            | 7513.81            |
| A_68_P22727582 | chr4:10935187-10935231                            | NM_175175:-442     | Plekhh2    | PROMOTER               | 0.603                                                        | 0.228                          | 2113.71            | 481.38             | 0.137                          | 1683.46            | 231.29             |
| A_68_P26133402 | chr8:107898609-107898653                          | NM_001081333:-650  | Plekhh4    | PROMOTER               | 0.612                                                        | 2.851                          | 3039.37            | 8665.39            | 1.746                          | 2366.70            | 4132.54            |
| A_68_P28072309 | chr11:101025372-101025416                         | NM_146030:7222     | Plekhh3    | INSIDE                 | 0.564                                                        | 0.645                          | 951.73             | 613.73             | 0.364                          | 781.18             | 284.37             |
| A_68_P27285555 | chr10:80260794-80260838                           | NM_023900:555      | Plekhl1    | INSIDE                 | 0.158                                                        | 23.409                         | 11019.46           | 257951.60          | 3.709                          | 12675.68           | 47008.31           |
| A_68_P27285560 | chr10:80261376-80261420                           | NM_023900:-27      | Plekhl1    | DIVERGENT_PROMOTER     | 0.442                                                        | 4.846                          | 1202.93            | 5829.57            | 2.144                          | 922.45             | 1977.41            |
| A_68_P28085163 | chr11:103273626-103273670                         | NM_183034:330      | Plekhl1    | INSIDE                 | 0.134                                                        | 2.744                          | 2841.21            | 7797.57            | 0.366                          | 1922.36            | 704.52             |
| A_68_P28085165 | chr11:103273873-103273917                         | NM_183034:84       | Plekhl1    | INSIDE                 | 0.61                                                         | 0.515                          | 1722.07            | 886.76             | 0.314                          | 1303.77            | 409.40             |
| A_68_P22346838 | chr3:95799917-95799961                            | NM_023320:-176     | Plekho1    | PROMOTER               | 0.504                                                        | 5.714                          | 1141.45            | 6521.89            | 2.879                          | 1178.79            | 3393.30            |
| A_68_P26588443 | chr9:65427955-65427999                            | NM_153119:-135     | Plekho2    | DIVERGENT_PROMOTER     | 0.28                                                         | 9.385                          | 4801.39            | 45060.09           | 2.624                          | 4058.99            | 10650.31           |
| A_68_P25477639 | chr7:129303337-129303384                          | NM_011121:410      | Plk1       | INSIDE                 | 0.621                                                        | 0.630                          | 1176.14            | 741.12             | 0.391                          | 935.48             | 366.10             |
| A_68_P29322927 | chr13:111184916-111184960                         | NM_152804:-313     | Plk2       | PROMOTER               | 0.494                                                        | 3.432                          | 2287.71            | 7850.49            | 1.696                          | 1950.48            | 3307.78            |
| A_68_P27282704 | chr10:79819796-79819840                           | NM_183152:615      | Plk5       | INSIDE                 | 0.31                                                         | 0.453                          | 1761.03            | 798.45             | 0.141                          | 1228.22            | 172.81             |
| A_68_P22282897 | chr3:82859249-82859293                            | NM_016784:-189     | Plrg1      | DIVERGENT_PROMOTER     | 0.25                                                         | 6.089                          | 3863.13            | 23520.79           | 1.523                          | 3271.48            | 4982.21            |
| A_68_P26744225 | chr9:95745638-95745682                            | NM_001033210:38    | Pls1       | INSIDE                 | 0.568                                                        | 4.480                          | 3735.02            | 16731.53           | 2.543                          | 2920.87            | 7428.76            |
| A_68_P26744223 | chr9:95745481-95745525                            | NM_001033210:196   | Pls1       | INSIDE                 | 0.626                                                        | 3.667                          | 2793.23            | 10243.12           | 2.295                          | 2477.91            | 5686.74            |
| A_68_P21820162 | chr2:164683144-164683188                          | NM_011125:42       | Pltp       | INSIDE                 | 0.65                                                         | 0.441                          | 1712.17            | 755.16             | 0.287                          | 1434.13            | 410.95             |
| A_68_P25957202 | chr8:74031641-74031685                            | NM_032398:4006     | Plvap      | INSIDE                 | 0.531                                                        | 5.078                          | 435.87             | 2213.15            | 2.698                          | 397.99             | 1073.82            |
| A_68_P28053756 | chr11:97847867-97847911                           | NM_001163608:-128  | Plxdc1     | PROMOTER               | 0.393                                                        | 11.939                         | 830.50             | 9915.23            | 4.692                          | 684.88             | 3213.30            |
| A_68_P24344494 | chr6:32537701-32537745                            | NM_175750:470      | Plxna4     | INSIDE                 | 0.592                                                        | 7.862                          | 1068.36            | 8399.66            | 4.657                          | 923.09             | 4298.69            |
| A_68_P26818266 | chr9:108998036-108998080                          | NM_172775:109      | Plxnb1     | INSIDE                 | 0.421                                                        | 5.352                          | 701.71             | 3755.20            | 2.253                          | 648.34             | 1460.50            |
| A_68_P26818267 | chr9:108998137-108998181                          | NM_172775:209      | Plxnb1     | INSIDE                 | 0.503                                                        | 7.555                          | 1089.73            | 8232.98            | 3.798                          | 873.87             | 3319.31            |
| A_68_P30423567 | chr15:88991606-88991650                           | NM_001159521:12652 | Plxnb2     | INSIDE                 | 0.195                                                        | 16.901                         | 8433.43            | 142530.80          | 3.291                          | 7079.71            | 23302.35           |
| A_68_P30423673 | chr15:89004061-89004105                           | NM_001159521:198   | Plxnb2     | INSIDE                 | 0.481                                                        | 4.895                          | 1883.89            | 9222.11            | 2.354                          | 1570.29            | 3696.63            |
| A_68_P30423564 | chr15:88991163-88991207                           | NM_001159521:13096 | Plxnb2     | INSIDE                 | 0.623                                                        | 4.460                          | 833.84             | 3719.29            | 2.78                           | 702.71             | 1953.79            |
| A_68_P30423730 | chr15:89010897-89010941                           | NM_001159521:-6638 | Plxnb2     | PROMOTER               | 0.577                                                        | 2.732                          | 1262.57            | 3449.71            | 1.577                          | 879.48             | 1386.68            |

| ProbeName       | Target position of probe on CpG island microarray | TargetID           | GeneSymbol | CpG island Description | Ratio of relative methylation (TiO <sub>2</sub> -NP/Vehicle) | Sham group                     |                    |                    | TiO <sub>2</sub> -H group      |                    |                    |
|-----------------|---------------------------------------------------|--------------------|------------|------------------------|--------------------------------------------------------------|--------------------------------|--------------------|--------------------|--------------------------------|--------------------|--------------------|
|                 |                                                   |                    |            |                        |                                                              | Relative methylation (Cy5/Cy3) | Cy3 signal (Input) | Cy5 signal (MeDIP) | Relative methylation (Cy5/Cy3) | Cy3 signal (Input) | Cy5 signal (MeDIP) |
| A_68_P27362366  | chr10:94407709-94407753                           | NM_018797:-518     | Plxnc1     | PROMOTER               | 0.217                                                        | 42.207                         | 234.31             | 9889.50            | 9.139                          | 198.95             | 1818.17            |
| A_68_P24774311  | chr6:115944633-115944678                          | NM_026376:368      | Plxnd1     | INSIDE                 | 0.39                                                         | 16.337                         | 3214.22            | 52511.56           | 6.372                          | 2471.36            | 15746.92           |
| A_68_P24774306  | chr6:115943883-115943927                          | NM_026376:1119     | Plxnd1     | INSIDE                 | 0.485                                                        | 11.333                         | 1106.07            | 12534.67           | 5.497                          | 1383.00            | 7602.58            |
| A_68_P22825645  | chr4:33276560-33276604                            | NM_001034867:130   | Pm20d2     | INSIDE                 | 0.661                                                        | 2.684                          | 600.64             | 1612.20            | 1.773                          | 590.12             | 1046.37            |
| A_68_P227857775 | chr11:62945991-62946035                           | NM_008885:1001     | Pmp22      | INSIDE                 | 0.192                                                        | 10.393                         | 1769.02            | 18385.28           | 1.998                          | 1494.83            | 2987.05            |
| A_68_P227857781 | chr11:62946689-62946733                           | NM_008885:1699     | Pmp22      | INSIDE                 | 0.573                                                        | 0.233                          | 2504.88            | 584.73             | 0.134                          | 1666.52            | 222.98             |
| A_68_P20231212  | chr1:-53353853-53353897                           | NM_153556:-34      | Pms1       | DIVERGENT_PROMOTER     | 0.421                                                        | 9.592                          | 1489.65            | 14288.44           | 4.043                          | 1317.53            | 5326.38            |
| A_68_P32464005  | chrX:70905148-70905192                            | NM_001199351:23    | Pnck       | INSIDE                 | 0.616                                                        | 2.852                          | 851.64             | 2428.53            | 1.757                          | 1087.71            | 1910.68            |
| A_68_P20347960  | chr1:74379230-74379274                            | NM_019999:69       | Pnkd       | INSIDE                 | 0.382                                                        | 1.466                          | 1572.00            | 2303.77            | 0.56                           | 1170.01            | 654.62             |
| A_68_P28596606  | chr12:85489129-85489173                           | NM_027438:289      | Pnma1      | INSIDE                 | 0.346                                                        | 0.536                          | 3092.20            | 1656.06            | 0.185                          | 2107.56            | 390.50             |
| A_68_P29681988  | chr14:67530140-67530184                           | NM_175498:118      | Pnma2      | INSIDE                 | 0.442                                                        | 0.292                          | 1655.47            | 482.92             | 0.129                          | 1332.49            | 171.74             |
| A_68_P29681987  | chr14:67530058-67530102                           | NM_175498:36       | Pnma2      | INSIDE                 | 0.645                                                        | 0.735                          | 2691.80            | 1978.50            | 0.474                          | 2134.64            | 1011.81            |
| A_68_P27614819  | chr11:17111398-17111442                           | NM_025443:172      | Pno1       | INSIDE                 | 0.339                                                        | 5.406                          | 1583.56            | 8560.84            | 1.83                           | 1306.05            | 2390.71            |
| A_68_P25588916  | chr7:148641001-148641045                          | NM_001163689:-64   | Pnpla2     | PROMOTER               | 0.577                                                        | 2.955                          | 1129.93            | 3339.02            | 1.705                          | 878.83             | 1498.41            |
| A_68_P25614471  | chr8:3537772-3537816                              | NM_001122818:22411 | Pnpla6     | INSIDE                 | 0.168                                                        | 12.242                         | 1592.29            | 19492.17           | 2.054                          | 1359.54            | 2792.23            |
| A_68_P25614473  | chr8:3537974-3538018                              | NM_001122818:22613 | Pnpla6     | INSIDE                 | 0.636                                                        | 2.270                          | 1775.72            | 4031.16            | 1.443                          | 1429.79            | 2063.06            |
| A_68_P22825899  | chr4:33334854-33334898                            | NM_001033225:886   | Pnrc1      | INSIDE                 | 0.256                                                        | 0.408                          | 2397.57            | 977.95             | 0.104                          | 1645.37            | 171.83             |
| A_68_P22825901  | chr4:33335015-33335059                            | NM_001033225:726   | Pnrc1      | INSIDE                 | 0.178                                                        | 1.469                          | 792.72             | 1164.64            | 0.261                          | 653.65             | 170.80             |
| A_68_P23330986  | chr4:135430015-135430060                          | NM_026383:-276     | Pnrc2      | PROMOTER               | 0.474                                                        | 1.402                          | 1820.51            | 2552.59            | 0.664                          | 1514.89            | 1006.63            |
| A_68_P27385038  | chr10:98569722-98569766                           | NM_027740:-60      | Poc1b      | PROMOTER               | 0.602                                                        | 3.098                          | 683.65             | 2118.01            | 1.864                          | 569.75             | 1061.75            |
| A_68_P24338521  | chr6:31513401-31513445                            | NM_013723:515      | Podxl      | INSIDE                 | 0.46                                                         | 11.340                         | 1099.14            | 12464.31           | 5.213                          | 940.67             | 4904.07            |
| A_68_P24624718  | chr6:88824525-88824569                            | NM_176973:-508     | Podxl2     | PROMOTER               | 0.324                                                        | 0.293                          | 3118.72            | 914.73             | 0.095                          | 2345.27            | 222.72             |
| A_68_P20800091  | chr1:168339580-168339624                          | NM_001142948:357   | Pogk       | INSIDE                 | 0.378                                                        | 11.590                         | 8607.21            | 99759.48           | 4.381                          | 6925.17            | 30336.49           |
| A_68_P22340919  | chr3:94642155-94642199                            | NM_001165948:688   | Pogz       | INSIDE                 | 0.373                                                        | 17.304                         | 1660.07            | 28725.60           | 6.451                          | 1218.90            | 7863.01            |
| A_68_P25088095  | chr7:51804301-51804346                            | NM_011131:-138     | Pold1      | PROMOTER               | 0.384                                                        | 5.520                          | 3324.86            | 18352.93           | 2.119                          | 2614.04            | 5539.68            |
| A_68_P27565430  | chr11:5778421-5778465                             | NM_008894:-183     | Pold2      | PROMOTER               | 0.473                                                        | 0.678                          | 2167.20            | 1468.51            | 0.32                           | 1711.56            | 548.48             |
| A_68_P22964956  | chr4:62185874-62185918                            | NM_021498:152      | Pole3      | INSIDE                 | 0.636                                                        | 0.539                          | 2503.40            | 1349.55            | 0.343                          | 1904.11            | 652.39             |
| A_68_P25261270  | chr7:86610733-86610777                            | NM_017462:405      | Polg       | INSIDE                 | 0.645                                                        | 3.370                          | 2568.92            | 8658.13            | 2.174                          | 2046.11            | 4448.13            |
| A_68_P28103448  | chr11:106640841-106640885                         | NM_015810:-11      | Polg2      | PROMOTER               | 0.322                                                        | 5.021                          | 1270.28            | 6378.51            | 1.616                          | 1028.30            | 1661.85            |
| A_68_P31205623  | chr17:46339517-46339561                           | NM_030715:36       | Polh       | INSIDE                 | 0.59                                                         | 0.497                          | 2549.61            | 1268.43            | 0.294                          | 1963.68            | 576.59             |
| A_68_P30678526  | chr16:37011868-37011912                           | NM_001159369:19    | Polq       | INSIDE                 | 0.618                                                        | 4.006                          | 1317.57            | 5278.82            | 2.475                          | 1050.69            | 2600.68            |
| A_68_P21623003  | chr2:128926712-128926756                          | NM_009086:3        | Polr1b     | INSIDE                 | 0.454                                                        | 4.534                          | 2538.32            | 11509.42           | 2.057                          | 2008.22            | 4131.54            |
| A_68_P21623005  | chr2:128926868-128926912                          | NM_009086:159      | Polr1b     | INSIDE                 | 0.591                                                        | 0.626                          | 891.38             | 558.17             | 0.37                           | 723.34             | 267.55             |
| A_68_P27896914  | chr11:69572502-69572546                           | NM_009089:-799     | Polr2a     | PROMOTER               | 0.419                                                        | 0.441                          | 1570.95            | 693.56             | 0.185                          | 1265.65            | 234.30             |
| A_68_P27896907  | chr11:69571625-69571671                           | NM_009089:77       | Polr2a     | INSIDE                 | 0.16                                                         | 2.453                          | 1058.38            | 2595.96            | 0.394                          | 908.40             | 357.54             |
| A_68_P23820901  | chr5:77739843-77739887                            | NM_153798:356      | Polr2b     | INSIDE                 | 0.536                                                        | 0.718                          | 1680.74            | 1206.98            | 0.385                          | 1337.27            | 514.50             |
| A_68_P26079858  | chr8:97381751-97381795                            | NM_009090:423      | Polr2c     | INSIDE                 | 0.612                                                        | 2.834                          | 1641.04            | 4651.18            | 1.734                          | 1473.97            | 2555.96            |
| A_68_P31599575  | chr18:31948663-31948707                           | NM_027002:-128     | Polr2d     | PROMOTER               | 0.416                                                        | 3.934                          | 4404.54            | 17325.76           | 1.638                          | 3654.87            | 5986.75            |
| A_68_P30589177  | chr16:20718065-20718109                           | NM_145632:188      | Polr2h     | INSIDE                 | 0.37                                                         | 6.874                          | 1813.67            | 12467.72           | 2.54                           | 1483.78            | 3769.07            |
| A_68_P30589173  | chr16:20717602-20717646                           | NM_145632:-274     | Polr2h     | DIVERGENT_PROMOTER     | 0.356                                                        | 0.624                          | 877.04             | 547.03             | 0.222                          | 763.70             | 169.46             |
| A_68_P25030468  | chr7:31017900-31017944                            | NM_027259:830      | Polr2i     | INSIDE                 | 0.482                                                        | 0.399                          | 1420.32            | 566.24             | 0.192                          | 934.33             | 179.40             |
| A_68_P24119515  | chr5:136592514-136592559                          | NM_011293:-24      | Polr2j     | PROMOTER               | 0.63                                                         | 0.483                          | 4323.18            | 2087.26            | 0.304                          | 2616.34            | 795.89             |
| A_68_P29701295  | chr14:70843090-70843134                           | NM_001164082:-78   | Polr3d     | PROMOTER               | 0.247                                                        | 0.636                          | 1674.47            | 1065.15            | 0.157                          | 1265.38            | 198.53             |
| A_68_P25471037  | chr7:128061761-128061805                          | NM_001164096:525   | Polr3e     | INSIDE                 | 0.64                                                         | 0.712                          | 1639.80            | 1167.97            | 0.456                          | 1203.18            | 548.86             |
| A_68_P25471034  | chr7:128061307-128061351                          | NM_001164096:71    | Polr3e     | INSIDE                 | 0.477                                                        | 0.515                          | 935.41             | 481.68             | 0.245                          | 725.06             | 177.99             |
| A_68_P30380497  | chr15:81756399-81756443                           | NM_030229:223      | Polr3h     | INSIDE                 | 0.428                                                        | 1.429                          | 2293.36            | 3278.18            | 0.612                          | 1756.62            | 1075.11            |

| ProbeName      | Target position of probe on CpG island microarray | TargetID          | GeneSymbol | CpG island Description | Ratio of relative methylation (TiO <sub>2</sub> -NP/Vehicle) | Sham group                     |                    |                    | TiO <sub>2</sub> -H group      |                    |                    |
|----------------|---------------------------------------------------|-------------------|------------|------------------------|--------------------------------------------------------------|--------------------------------|--------------------|--------------------|--------------------------------|--------------------|--------------------|
|                |                                                   |                   |            |                        |                                                              | Relative methylation (Cy5/Cy3) | Cy3 signal (Input) | Cy5 signal (MeDIP) | Relative methylation (Cy5/Cy3) | Cy3 signal (Input) | Cy5 signal (MeDIP) |
| A_68_P27278598 | chr10:79198902-79198960                           | NM_172551:10396   | Polrmt     | INSIDE                 | 0.552                                                        | 4.807                          | 740.39             | 3559.27            | 2.656                          | 640.79             | 1701.96            |
| A_68_P27278628 | chr10:79202047-79202091                           | NM_172551:7258    | Polrmt     | INSIDE                 | 0.526                                                        | 2.911                          | 1358.85            | 3955.25            | 1.532                          | 1182.89            | 1811.96            |
| A_68_P24116186 | chr5:135870022-135870066                          | NM_148932:372     | Pom121     | INSIDE                 | 0.115                                                        | 13.618                         | 1646.66            | 22423.52           | 1.569                          | 1600.49            | 2511.52            |
| A_68_P28875600 | chr13:22073387-22073431                           | NM_001162929:346  | Pom121I2   | INSIDE                 | 0.521                                                        | 4.596                          | 2683.11            | 12332.36           | 2.396                          | 2012.63            | 4821.61            |
| A_68_P28197877 | chr12:3960273-3960317                             | NM_008895:5344    | Pomc       | INSIDE                 | 0.498                                                        | 0.206                          | 2197.34            | 453.30             | 0.103                          | 1717.83            | 176.59             |
| A_68_P21114136 | chr2:32092306-32092350                            | NM_145145:126     | Pomt1      | INSIDE                 | 0.565                                                        | 2.951                          | 1891.23            | 5581.27            | 1.667                          | 1610.80            | 2685.22            |
| A_68_P24117608 | chr5:136209662-136209706                          | NM_008898:44601   | Por        | INSIDE                 | 0.181                                                        | 10.332                         | 3038.55            | 31393.97           | 1.865                          | 2076.18            | 3872.82            |
| A_68_P24117359 | chr5:136164594-136164638                          | NM_008898:-467    | Por        | PROMOTER               | 0.461                                                        | 0.298                          | 1782.05            | 531.31             | 0.137                          | 1258.03            | 172.74             |
| A_68_P24117361 | chr5:136164752-136164796                          | NM_008898:-309    | Por        | PROMOTER               | 0.546                                                        | 9.589                          | 2177.46            | 20878.79           | 5.236                          | 1914.85            | 10026.02           |
| A_68_P24117609 | chr5:136209766-136209810                          | NM_008898:44705   | Por        | INSIDE                 | 0.535                                                        | 4.017                          | 767.73             | 3084.09            | 2.151                          | 566.80             | 1219.06            |
| A_68_P24117607 | chr5:136209485-136209529                          | NM_008898:44423   | Por        | INSIDE                 | 0.439                                                        | 3.226                          | 2989.33            | 9645.02            | 1.416                          | 2259.15            | 3199.48            |
| A_68_P20797864 | chr1:167933679-167933723                          | NM_011137:-935    | Pou2f1     | PROMOTER               | 0.474                                                        | 11.169                         | 1554.10            | 17357.40           | 5.294                          | 1399.86            | 7411.20            |
| A_68_P26460308 | chr9:43013714-43013758                            | NM_011139:102     | Pou2f3     | INSIDE                 | 0.204                                                        | 1.435                          | 1816.19            | 2607.09            | 0.293                          | 1437.86            | 420.73             |
| A_68_P26460307 | chr9:43013586-43013630                            | NM_011139:230     | Pou2f3     | INSIDE                 | 0.241                                                        | 3.062                          | 5560.16            | 17023.88           | 0.739                          | 4550.98            | 3363.56            |
| A_68_P23269516 | chr4:124335391-124335435                          | NM_011141:524     | Pou3f1     | INSIDE                 | 0.336                                                        | 9.005                          | 1443.44            | 12997.70           | 3.022                          | 1355.45            | 4096.45            |
| A_68_P23269526 | chr4:124336792-124336836                          | NM_011141:1926    | Pou3f1     | INSIDE                 | 0.496                                                        | 0.344                          | 6618.55            | 2274.65            | 0.171                          | 4445.77            | 758.31             |
| A_68_P23269522 | chr4:124336272-124336316                          | NM_011141:1406    | Pou3f1     | INSIDE                 | 0.343                                                        | 1.740                          | 2076.23            | 3613.18            | 0.598                          | 1760.83            | 1052.14            |
| A_68_P22778510 | chr4:22415241-22415285                            | NM_008899:16      | Pou3f2     | INSIDE                 | 0.544                                                        | 0.391                          | 2107.39            | 824.79             | 0.213                          | 1663.65            | 353.90             |
| A_68_P22778521 | chr4:22416923-22416967                            | NM_008899:-1666   | Pou3f2     | PROMOTER               | 0.539                                                        | 0.622                          | 822.76             | 511.47             | 0.335                          | 634.98             | 212.88             |
| A_68_P20184680 | chr1:42755426-42755470                            | NM_008900:1458    | Pou3f3     | INSIDE                 | 0.429                                                        | 17.782                         | 4072.45            | 72416.80           | 7.622                          | 4099.35            | 31245.41           |
| A_68_P20184674 | chr1:42754743-42754787                            | NM_008900:774     | Pou3f3     | INSIDE                 | 0.609                                                        | 0.593                          | 2034.26            | 1205.46            | 0.361                          | 1555.61            | 561.49             |
| A_68_P29871680 | chr14:104872642-104872686                         | NM_011143:-5448   | Pou4f1     | PROMOTER               | 0.209                                                        | 52.150                         | 4740.71            | 247225.60          | 10.897                         | 4514.38            | 49195.20           |
| A_68_P25988740 | chr8:80959381-80959425                            | NM_138944:1149    | Pou4f2     | INSIDE                 | 0.151                                                        | 1.540                          | 13955.02           | 21493.13           | 0.232                          | 8368.32            | 1939.93            |
| A_68_P31655269 | chr18:42554834-42554878                           | NM_138945:606     | Pou4f3     | INSIDE                 | 0.625                                                        | 0.441                          | 2025.91            | 892.64             | 0.275                          | 1499.75            | 413.05             |
| A_68_P29336883 | chr13:113591639-113591683                         | NM_008903:530     | Ppap2a     | INSIDE                 | 0.544                                                        | 0.593                          | 2283.63            | 1353.95            | 0.322                          | 1912.62            | 616.80             |
| A_68_P27277398 | chr10:78996156-78996200                           | NM_015817:354     | Ppap2c     | INSIDE                 | 0.144                                                        | 4.409                          | 1718.05            | 7574.22            | 0.637                          | 1333.98            | 849.22             |
| A_68_P25728673 | chr8:26830531-26830575                            | NM_028000:33      | Ppapdc1b   | INSIDE                 | 0.292                                                        | 8.777                          | 2196.63            | 19278.84           | 2.563                          | 1849.34            | 4739.13            |
| A_68_P25728674 | chr8:26830692-26830736                            | NM_028000:195     | Ppapdc1b   | INSIDE                 | 0.656                                                        | 0.670                          | 1428.07            | 957.13             | 0.439                          | 1080.84            | 474.91             |
| A_68_P32050411 | chr19:29049575-29049620                           | NM_028922:11188   | Ppapdc2    | DOWNSTREAM             | 0.49                                                         | 0.639                          | 754.78             | 482.52             | 0.313                          | 633.51             | 198.51             |
| A_68_P30402716 | chr15:85566360-85566404                           | NM_011144:177     | Ppara      | INSIDE                 | 0.385                                                        | 0.329                          | 1738.36            | 572.53             | 0.127                          | 1333.40            | 169.13             |
| A_68_P30402711 | chr15:85565654-85565698                           | NM_001113418:-317 | Ppara      | PROMOTER               | 0.458                                                        | 0.511                          | 919.18             | 469.78             | 0.234                          | 732.13             | 171.25             |
| A_68_P31121256 | chr17:28369519-28369563                           | NM_011145:-158    | Ppard      | PROMOTER               | 0.535                                                        | 2.862                          | 2483.10            | 7107.74            | 1.531                          | 1918.90            | 2937.62            |
| A_68_P24770499 | chr6:115312049-115312093                          | NM_001127330:832  | Pparg      | INSIDE                 | 0.353                                                        | 4.126                          | 1543.15            | 6366.58            | 1.457                          | 1149.46            | 1674.46            |
| A_68_P31757526 | chr18:61558105-61558149                           | NM_133249:1959    | Ppargc1b   | INSIDE                 | 0.379                                                        | 5.728                          | 4256.60            | 24379.78           | 2.171                          | 3385.49            | 7350.66            |
| A_68_P31757530 | chr18:61558577-61558621                           | NM_133249:1487    | Ppargc1b   | INSIDE                 | 0.509                                                        | 0.227                          | 3369.00            | 764.95             | 0.116                          | 2313.21            | 267.30             |
| A_68_P31757535 | chr18:61559223-61559268                           | NM_133249:840     | Ppargc1b   | INSIDE                 | 0.647                                                        | 2.812                          | 5430.66            | 15270.23           | 1.819                          | 4172.25            | 7587.30            |
| A_68_P23819023 | chr5:77380662-77380706                            | NM_172146:-81     | Ppat       | PROMOTER               | 0.276                                                        | 8.298                          | 3676.70            | 30508.73           | 2.291                          | 3140.00            | 7193.87            |
| A_68_P25092685 | chr7:52622314-52622358                            | NM_029741:53      | Ppfia3     | INSIDE                 | 0.164                                                        | 17.299                         | 1478.94            | 25584.70           | 2.83                           | 1291.89            | 3655.76            |
| A_68_P25092648 | chr7:52616935-52616979                            | NM_029741:5433    | Ppfia3     | INSIDE                 | 0.43                                                         | 0.360                          | 2045.80            | 736.44             | 0.155                          | 1522.41            | 235.79             |
| A_68_P25092682 | chr7:52621989-52622033                            | NM_029741:379     | Ppfia3     | INSIDE                 | 0.558                                                        | 4.595                          | 1392.60            | 6398.41            | 2.562                          | 1231.04            | 3154.06            |
| A_68_P25092684 | chr7:52622218-52622262                            | NM_029741:149     | Ppfia3     | INSIDE                 | 0.612                                                        | 3.364                          | 1074.10            | 3613.66            | 2.059                          | 934.85             | 1925.29            |
| A_68_P27568397 | chr11:6315971-6316015                             | NM_008907:120     | Ppia       | INSIDE                 | 0.584                                                        | 5.032                          | 2503.18            | 12596.68           | 2.937                          | 2126.45            | 6245.58            |
| A_68_P27568398 | chr11:6316069-6316113                             | NM_008907:218     | Ppia       | INSIDE                 | 0.589                                                        | 7.384                          | 4050.31            | 29909.23           | 4.352                          | 3279.79            | 14272.93           |
| A_68_P26590952 | chr9:65908094-65908138                            | NM_011149:141     | Ppib       | INSIDE                 | 0.288                                                        | 16.430                         | 1869.26            | 30711.29           | 4.737                          | 1550.75            | 7345.68            |
| A_68_P31713137 | chr18:53577351-53577395                           | NM_008908:289     | Ppic       | INSIDE                 | 0.573                                                        | 0.214                          | 8818.02            | 1890.04            | 0.123                          | 5882.07            | 722.96             |
| A_68_P29479229 | chr14:26513511-26513556                           | NM_134084:-122    | Ppif       | PROMOTER               | 0.582                                                        | 0.277                          | 1826.32            | 506.33             | 0.161                          | 1504.75            | 242.94             |

| ProbeName      | Target position of probe on CpG island microarray | TargetID          | GeneSymbol | CpG island Description | Ratio of relative methylation (TiO <sub>2</sub> -NP/Vehicle) | Sham group                     |                    |                    | TiO <sub>2</sub> -H group      |                    |                    |
|----------------|---------------------------------------------------|-------------------|------------|------------------------|--------------------------------------------------------------|--------------------------------|--------------------|--------------------|--------------------------------|--------------------|--------------------|
|                |                                                   |                   |            |                        |                                                              | Relative methylation (Cy5/Cy3) | Cy3 signal (Input) | Cy5 signal (MeDIP) | Relative methylation (Cy5/Cy3) | Cy3 signal (Input) | Cy5 signal (MeDIP) |
| A_68_P23244929 | chr4:118993213-118993257                          | NM_028677:-106    | Pp1h       | PROMOTER               | 0.649                                                        | 0.521                          | 2026.80            | 1055.06            | 0.338                          | 1542.53            | 521.22             |
| A_68_P31126967 | chr17:29400949-29400993                           | NM_026845:-54     | Pp1l       | DIVERGENT_PROMOTER     | 0.627                                                        | 3.702                          | 1073.72            | 3975.37            | 2.322                          | 925.55             | 2148.69            |
| A_68_P20258947 | chr1:58502118-58502162                            | NM_027351:190     | Pp1l3      | INSIDE                 | 0.361                                                        | 0.279                          | 2470.29            | 689.35             | 0.101                          | 1768.09            | 178.24             |
| A_68_P27089555 | chr10:41210220-41210264                           | NM_028430:-2      | Pp1l6      | DIVERGENT_PROMOTER     | 0.561                                                        | 0.713                          | 1762.19            | 1256.05            | 0.4                            | 1340.79            | 535.67             |
| A_68_P30513991 | chr16:5132312-5132356                             | NM_008909:240     | Pp1        | INSIDE                 | 0.53                                                         | 0.562                          | 5415.45            | 3044.06            | 0.298                          | 4165.18            | 1241.18            |
| A_68_P30513988 | chr16:5132000-5132044                             | NM_008909:552     | Pp1        | INSIDE                 | 0.642                                                        | 0.305                          | 2063.75            | 629.58             | 0.196                          | 1408.36            | 275.65             |
| A_68_P28533645 | chr12:73862367-73862411                           | NM_008910:191     | Pp1m1a     | INSIDE                 | 0.4                                                          | 7.813                          | 3411.99            | 26657.79           | 3.122                          | 2809.36            | 8771.36            |
| A_68_P31407761 | chr17:85357878-85357922                           | NM_001159496:560  | Pp1m1b     | INSIDE                 | 0.25                                                         | 13.811                         | 901.58             | 12451.38           | 3.455                          | 797.45             | 2755.07            |
| A_68_P27993897 | chr11:87172172-87172216                           | NM_177167:302     | Pp1m1e     | INSIDE                 | 0.367                                                        | 7.524                          | 1691.21            | 12724.86           | 2.761                          | 1419.79            | 3920.31            |
| A_68_P23577162 | chr5:31523190-31523234                            | NM_008014:-294    | Pp1m1g     | PROMOTER               | 0.5                                                          | 0.328                          | 1437.81            | 471.55             | 0.164                          | 1047.96            | 171.87             |
| A_68_P23577160 | chr5:31522948-31522992                            | NM_008014:-52     | Pp1m1g     | PROMOTER               | 0.583                                                        | 8.862                          | 3065.63            | 27168.74           | 5.171                          | 2698.63            | 13954.10           |
| A_68_P27509905 | chr10:122115624-122115668                         | NM_176919:-171    | Pp1m1h     | PROMOTER               | 0.413                                                        | 0.346                          | 1706.44            | 590.47             | 0.143                          | 1214.48            | 173.64             |
| A_68_P22393107 | chr3:104584043-104584087                          | NM_027982:91      | Pp1m1j     | INSIDE                 | 0.315                                                        | 0.298                          | 2426.55            | 724.12             | 0.094                          | 1859.20            | 174.92             |
| A_68_P22393109 | chr3:104584285-104584329                          | NM_027982:333     | Pp1m1j     | INSIDE                 | 0.537                                                        | 15.569                         | 2500.03            | 38921.97           | 8.362                          | 2174.36            | 18181.62           |
| A_68_P22220267 | chr3:69120847-69120891                            | NM_178726:29      | Pp1m1l     | INSIDE                 | 0.66                                                         | 0.358                          | 2916.72            | 1043.10            | 0.236                          | 2394.70            | 565.15             |
| A_68_P22220265 | chr3:69120566-69120610                            | NM_178726:-251    | Pp1m1l     | PROMOTER               | 0.659                                                        | 0.639                          | 2269.43            | 1449.66            | 0.421                          | 1675.42            | 704.89             |
| A_68_P24992443 | chr7:19865221-19865265                            | NM_177691:156     | Pp1m1n     | INSIDE                 | 0.377                                                        | 4.065                          | 1250.25            | 5082.41            | 1.531                          | 1154.90            | 1767.86            |
| A_68_P31921666 | chr19:4192011-4192055                             | NM_031868:-141    | Pp1l1ca    | DIVERGENT_PROMOTER     | 0.539                                                        | 0.572                          | 1919.29            | 1097.91            | 0.308                          | 1614.27            | 497.29             |
| A_68_P31921667 | chr19:4192216-4192260                             | NM_031868:65      | Pp1l1ca    | INSIDE                 | 0.552                                                        | 0.542                          | 2474.68            | 1340.84            | 0.299                          | 1970.46            | 589.10             |
| A_68_P23584119 | chr5:32761375-32761419                            | NM_172707:54      | Pp1l1cb    | INSIDE                 | 0.522                                                        | 6.523                          | 5572.54            | 36350.01           | 3.407                          | 4639.94            | 15808.09           |
| A_68_P24048831 | chr5:122608072-122608116                          | NM_013636:-193    | Pp1l1cc    | PROMOTER               | 0.644                                                        | 2.715                          | 2745.16            | 7453.73            | 1.748                          | 2260.82            | 3950.81            |
| A_68_P27430008 | chr10:107599648-107599692                         | NM_027892:215     | Pp1l1r2a   | INSIDE                 | 0.647                                                        | 4.061                          | 1526.10            | 6197.06            | 2.626                          | 1270.34            | 3336.52            |
| A_68_P20636473 | chr1:136852289-136852333                          | NM_001081307:207  | Pp1l1r2b   | INSIDE                 | 0.326                                                        | 15.818                         | 1902.64            | 30096.17           | 5.159                          | 1589.06            | 8197.65            |
| A_68_P24992918 | chr7:19955528-19955572                            | NM_001010836:8986 | Pp1l1r3l   | INSIDE                 | 0.603                                                        | 2.499                          | 1169.52            | 2922.70            | 1.506                          | 1014.37            | 1527.81            |
| A_68_P25026383 | chr7:30074297-30074341                            | NM_026731:-20     | Pp1l1r4a   | DIVERGENT_PROMOTER     | 0.612                                                        | 4.710                          | 1431.36            | 6742.01            | 2.885                          | 1184.09            | 3416.07            |
| A_68_P25026386 | chr7:30074743-30074787                            | NM_026731:426     | Pp1l1r4a   | INSIDE                 | 0.484                                                        | 0.671                          | 847.44             | 568.42             | 0.324                          | 530.14             | 171.96             |
| A_68_P31937057 | chr19:7049099-7049143                             | NM_008889:-417    | Pp1l1r4b   | DIVERGENT_PROMOTER     | 0.54                                                         | 0.209                          | 2396.80            | 500.89             | 0.113                          | 1723.92            | 194.53             |
| A_68_P20625773 | chr1:135028384-135028428                          | NM_133819:664     | Pp1l1r5b   | INSIDE                 | 0.592                                                        | 0.401                          | 1435.44            | 575.17             | 0.237                          | 1172.41            | 277.93             |
| A_68_P20625767 | chr1:135027845-135027889                          | NM_133819:124     | Pp1l1r5b   | INSIDE                 | 0.522                                                        | 0.697                          | 2508.78            | 1747.81            | 0.363                          | 1895.67            | 688.95             |
| A_68_P30349855 | chr15:76502255-76502299                           | NM_033371:167     | Pp1l1r6a   | INSIDE                 | 0.546                                                        | 10.440                         | 4083.59            | 42633.47           | 5.701                          | 3855.50            | 21979.22           |
| A_68_P21784241 | chr2:158493133-158493177                          | NM_001159662:284  | Pp1l1r6b   | INSIDE                 | 0.283                                                        | 0.236                          | 4732.26            | 1116.97            | 0.067                          | 3217.17            | 214.96             |
| A_68_P21784240 | chr2:158492976-158493020                          | NM_001159662:128  | Pp1l1r6b   | INSIDE                 | 0.58                                                         | 0.360                          | 2120.45            | 764.03             | 0.209                          | 1797.42            | 375.58             |
| A_68_P28055832 | chr11:98209796-98209843                           | NM_144828:-232    | Pp1l1r1b   | PROMOTER               | 0.227                                                        | 1.803                          | 1408.55            | 2540.03            | 0.409                          | 928.28             | 379.58             |
| A_68_P30646578 | chr16:31275334-31275378                           | NM_025800:7       | Pp1r2      | INSIDE                 | 0.2                                                          | 11.668                         | 2788.76            | 32538.38           | 2.338                          | 2356.89            | 5511.18            |
| A_68_P21890601 | chr2:178148869-178148913                          | NM_001085501:287  | Pp1l1r3d   | INSIDE                 | 0.558                                                        | 22.506                         | 2154.23            | 48483.33           | 12.559                         | 2294.34            | 28814.06           |
| A_68_P28946211 | chr13:36060705-36060749                           | NM_029628:952     | Pp1l1r3g   | INSIDE                 | 0.266                                                        | 7.148                          | 917.76             | 6560.38            | 1.898                          | 845.58             | 1604.89            |
| A_68_P23314346 | chr4:132399235-132399279                          | NM_146154:-172    | Pp1l1r8    | PROMOTER               | 0.642                                                        | 0.722                          | 1960.31            | 1415.94            | 0.464                          | 1512.67            | 701.92             |
| A_68_P28035919 | chr11:94852484-94852528                           | NM_172261:-19     | Pp1l1r9b   | PROMOTER               | 0.621                                                        | 5.740                          | 701.44             | 4026.28            | 3.563                          | 655.97             | 2337.10            |
| A_68_P28035927 | chr11:94853399-94853443                           | NM_172261:895     | Pp1l1r9b   | INSIDE                 | 0.636                                                        | 6.288                          | 606.41             | 3813.08            | 4.002                          | 495.49             | 1983.02            |
| A_68_P28035916 | chr11:94852207-94852251                           | NM_172261:-297    | Pp1l1r9b   | PROMOTER               | 0.664                                                        | 0.697                          | 2842.56            | 1980.93            | 0.463                          | 2087.21            | 966.41             |
| A_68_P28035922 | chr11:94852837-94852881                           | NM_172261:333     | Pp1l1r9b   | INSIDE                 | 0.632                                                        | 2.510                          | 1136.77            | 2853.42            | 1.588                          | 944.22             | 1499.01            |
| A_68_P29682921 | chr14:67691110-67691154                           | NM_001205188:176  | Pp1r2a     | INSIDE                 | 0.262                                                        | 0.170                          | 6397.46            | 1084.75            | 0.044                          | 4803.79            | 213.56             |
| A_68_P29682917 | chr14:67690619-67690663                           | NM_001205188:668  | Pp1r2a     | INSIDE                 | 0.594                                                        | 14.113                         | 2435.77            | 34375.09           | 8.383                          | 2204.27            | 18479.41           |
| A_68_P23610086 | chr5:37259995-37260039                            | NM_172994:208     | Pp1r2c     | INSIDE                 | 0.438                                                        | 11.014                         | 2582.42            | 28443.98           | 4.823                          | 1995.29            | 9623.79            |
| A_68_P23610095 | chr5:37260897-37260941                            | NM_172994:1110    | Pp1r2c     | INSIDE                 | 0.516                                                        | 5.453                          | 695.53             | 3792.80            | 2.815                          | 653.94             | 1840.67            |
| A_68_P25574426 | chr7:146038756-146038800                          | NM_026391:710     | Pp1r2d     | INSIDE                 | 0.657                                                        | 3.635                          | 773.34             | 2810.95            | 2.388                          | 696.51             | 1663.32            |



| ProbeName      | Target position of probe on CpG island microarray | TargetID            | GeneSymbol | CpG island Description | Ratio of relative methylation (TiO <sub>2</sub> -NP/Vehicle) | Sham group                     |                    |                    | TiO <sub>2</sub> -H group      |                    |                    |
|----------------|---------------------------------------------------|---------------------|------------|------------------------|--------------------------------------------------------------|--------------------------------|--------------------|--------------------|--------------------------------|--------------------|--------------------|
|                |                                                   |                     |            |                        |                                                              | Relative methylation (Cy5/Cy3) | Cy3 signal (Input) | Cy5 signal (MeDIP) | Relative methylation (Cy5/Cy3) | Cy3 signal (Input) | Cy5 signal (MeDIP) |
| A_68_P26773477 | chr9:101153798-101153842                          | NM_001161362:342    | Ppp2r3a    | INSIDE                 | 0.425                                                        | 3.958                          | 819.45             | 3243.52            | 1.682                          | 774.08             | 1302.28            |
| A_68_P33012167 | chr9_random:55784-55828                           | NM_011154:-774      | Ppp2r3d    | PROMOTER               | 0.448                                                        | 0.336                          | 4242.99            | 1424.99            | 0.15                           | 3167.36            | 476.68             |
| A_68_P33012160 | chr9_random:55072-55116                           | NM_011154:-62       | Ppp2r3d    | PROMOTER               | 0.472                                                        | 5.249                          | 3128.53            | 16420.36           | 2.478                          | 2413.88            | 5982.19            |
| A_68_P20937889 | chr1:193221406-193221450                          | NM_144880:-508      | Ppp2r5a    | PROMOTER               | 0.315                                                        | 5.800                          | 1288.39            | 7472.35            | 1.829                          | 989.90             | 1810.50            |
| A_68_P31933357 | chr19:6235648-6235692                             | NM_198168:170       | Ppp2r5b    | INSIDE                 | 0.374                                                        | 4.957                          | 802.99             | 3980.75            | 1.855                          | 635.64             | 1179.19            |
| A_68_P28738222 | chr12:111685697-111685741                         | NM_001135001:330    | Ppp2r5c    | INSIDE                 | 0.363                                                        | 1.387                          | 2953.34            | 4095.97            | 0.503                          | 2514.36            | 1265.01            |
| A_68_P28738216 | chr12:111684724-111684768                         | NM_001135001:-642   | Ppp2r5c    | PROMOTER               | 0.49                                                         | 3.390                          | 3912.71            | 13263.31           | 1.66                           | 3370.77            | 5594.48            |
| A_68_P28738217 | chr12:111684829-111684873                         | NM_001135001:-538   | Ppp2r5c    | PROMOTER               | 0.203                                                        | 7.908                          | 1681.31            | 13296.40           | 1.604                          | 2104.87            | 3375.66            |
| A_68_P28549425 | chr12:76697618-76697662                           | NM_012024:-453      | Ppp2r5e    | PROMOTER               | 0.523                                                        | 3.840                          | 3336.00            | 12808.60           | 2.008                          | 2748.52            | 5519.67            |
| A_68_P28549422 | chr12:76697372-76697416                           | NM_012024:-207      | Ppp2r5e    | PROMOTER               | 0.629                                                        | 0.644                          | 4695.46            | 3024.70            | 0.405                          | 3699.68            | 1499.29            |
| A_68_P22558745 | chr3:136333964-136334008                          | NM_008913:253       | Ppp3ca     | INSIDE                 | 0.65                                                         | 0.745                          | 2676.85            | 1993.21            | 0.484                          | 1857.76            | 899.35             |
| A_68_P22558741 | chr3:136333499-136333554                          | NM_008913:-207      | Ppp3ca     | PROMOTER               | 0.651                                                        | 3.192                          | 459.06             | 1465.28            | 2.078                          | 380.92             | 791.54             |
| A_68_P29700473 | chr14:70689417-70689461                           | NM_008915:-182      | Ppp3cc     | PROMOTER               | 0.542                                                        | 2.975                          | 771.38             | 2294.97            | 1.614                          | 713.08             | 1150.58            |
| A_68_P27614517 | chr11:17059599-17059643                           | NM_024459:320       | Ppp3r1     | INSIDE                 | 0.283                                                        | 6.398                          | 2908.18            | 18606.77           | 1.811                          | 2466.91            | 4467.17            |
| A_68_P31302643 | chr17:66132754-66132798                           | NM_001114131:82     | Ppp4r1     | INSIDE                 | 0.346                                                        | 6.280                          | 3857.08            | 24222.78           | 2.172                          | 3292.08            | 7150.77            |
| A_68_P21871010 | chr2:173484993-173485037                          | NR_027957:26        | Ppp4r1-ps  | INSIDE                 | 0.411                                                        | 9.287                          | 2064.72            | 19175.46           | 3.816                          | 1801.11            | 6872.69            |
| A_68_P21871011 | chr2:173485139-173485183                          | NR_027957:-120      | Ppp4r1-ps  | DIVERGENT_PROMOTER     | 0.6                                                          | 0.377                          | 1285.09            | 484.87             | 0.227                          | 960.35             | 217.53             |
| A_68_P24984543 | chr7:17612915-17612959                            | NM_011155:327       | Ppp5c      | INSIDE                 | 0.664                                                        | 3.691                          | 1055.36            | 3895.75            | 2.452                          | 934.96             | 2292.96            |
| A_68_P24949868 | chr7:4610619-4610663                              | NM_172894:-88       | Ppp6r1     | PROMOTER               | 0.663                                                        | 0.643                          | 1670.29            | 1074.66            | 0.427                          | 1322.38            | 564.43             |
| A_68_P31918147 | chr19:3575682-3575726                             | NM_001164159:45     | Ppp6r3     | INSIDE                 | 0.538                                                        | 0.164                          | 4289.07            | 703.75             | 0.088                          | 2937.32            | 259.44             |
| A_68_P31918148 | chr19:3575782-3575826                             | NM_001164159:-55    | Ppp6r3     | PROMOTER               | 0.508                                                        | 2.942                          | 7004.83            | 20611.47           | 1.496                          | 5031.46            | 7526.72            |
| A_68_P30380957 | chr15:81846273-81846317                           | NM_134095:276       | Pppde2     | INSIDE                 | 0.288                                                        | 6.828                          | 2369.30            | 16177.16           | 1.965                          | 2069.58            | 4066.70            |
| A_68_P30380961 | chr15:81846636-81846680                           | NM_134095:-88       | Pppde2     | DIVERGENT_PROMOTER     | 0.494                                                        | 0.082                          | 7904.43            | 648.06             | 0.041                          | 5489.92            | 222.38             |
| A_68_P32141867 | chr19:46131714-46131758                           | NM_001081214:708    | Pprc1      | INSIDE                 | 0.257                                                        | 0.539                          | 3616.58            | 1951.08            | 0.138                          | 2799.71            | 387.55             |
| A_68_P23351039 | chr4:138866532-138866576                          | NM_145384:61        | Pqlc2      | INSIDE                 | 0.473                                                        | 0.445                          | 1055.46            | 469.76             | 0.211                          | 810.85             | 170.77             |
| A_68_P32239859 | chrX:7305710-7305754                              | NM_138602:36        | Praf2      | INSIDE                 | 0.374                                                        | 4.428                          | 706.00             | 3126.29            | 1.657                          | 884.39             | 1465.77            |
| A_68_P23374912 | chr4:142984306-142984350                          | NM_031377:-15       | Pram11     | PROMOTER               | 0.185                                                        | 17.768                         | 4460.54            | 79254.39           | 3.291                          | 3162.67            | 10408.06           |
| A_68_P25265834 | chr7:87439359-87439403                            | NM_145150:30        | Prc1       | INSIDE                 | 0.369                                                        | 0.247                          | 4920.70            | 1216.96            | 0.091                          | 3560.89            | 324.82             |
| A_68_P25265832 | chr7:87439097-87439141                            | NM_145150:-232      | Prc1       | PROMOTER               | 0.607                                                        | 8.026                          | 2723.51            | 21857.93           | 4.869                          | 2372.66            | 11552.24           |
| A_68_P25265836 | chr7:87439680-87439724                            | NM_145150:352       | Prc1       | INSIDE                 | 0.661                                                        | 0.644                          | 1363.99            | 878.62             | 0.426                          | 1112.17            | 473.71             |
| A_68_P21432198 | chr2:92885847-92885891                            | NM_001177536:433    | Prdm11     | INSIDE                 | 0.427                                                        | 5.289                          | 3023.10            | 15989.88           | 2.261                          | 2238.96            | 5061.45            |
| A_68_P21431995 | chr2:92855411-92855455                            | NM_001177536:30869  | Prdm11     | INSIDE                 | 0.59                                                         | 2.717                          | 1286.95            | 3497.04            | 1.603                          | 1005.85            | 1612.73            |
| A_68_P21110348 | chr2:31491307-31491351                            | NM_001123362:-4228  | Prdm12     | PROMOTER               | 0.383                                                        | 0.201                          | 10562.22           | 2118.78            | 0.077                          | 6120.66            | 470.58             |
| A_68_P21110386 | chr2:31495757-31495801                            | NM_001123362:222    | Prdm12     | INSIDE                 | 0.576                                                        | 6.497                          | 3228.70            | 20975.42           | 3.739                          | 2586.37            | 9671.65            |
| A_68_P21110351 | chr2:31491732-31491776                            | NM_001123362:-3802  | Prdm12     | PROMOTER               | 0.346                                                        | 0.665                          | 1764.65            | 1172.67            | 0.23                           | 1419.36            | 326.21             |
| A_68_P21110366 | chr2:31493479-31493523                            | NM_001123362:-2056  | Prdm12     | PROMOTER               | 0.463                                                        | 3.794                          | 1553.31            | 5893.20            | 1.755                          | 1458.55            | 2559.78            |
| A_68_P22774300 | chr4:21606032-21606076                            | NM_001080771:7056   | Prdm13     | INSIDE                 | 0.559                                                        | 5.640                          | 604.33             | 3408.35            | 3.151                          | 543.35             | 1712.21            |
| A_68_P22774296 | chr4:21605518-21605562                            | NM_001080771:7570   | Prdm13     | INSIDE                 | 0.448                                                        | 4.182                          | 559.41             | 2339.56            | 1.875                          | 546.00             | 1023.88            |
| A_68_P23430799 | chr4:153715942-153715986                          | NM_001177995:295018 | Prdm16     | INSIDE                 | 0.219                                                        | 12.606                         | 3980.75            | 50180.00           | 2.758                          | 2948.33            | 8132.86            |
| A_68_P23430797 | chr4:153715735-153715779                          | NM_001177995:295226 | Prdm16     | INSIDE                 | 0.367                                                        | 8.994                          | 3790.60            | 34091.07           | 3.297                          | 3094.69            | 10202.19           |
| A_68_P23430798 | chr4:153715842-153715886                          | NM_001177995:295118 | Prdm16     | INSIDE                 | 0.438                                                        | 15.483                         | 4044.38            | 62621.07           | 6.781                          | 2778.82            | 18843.17           |
| A_68_P23373725 | chr4:142752302-142752346                          | NM_001081355:50288  | Prdm2      | INSIDE                 | 0.587                                                        | 0.294                          | 1755.01            | 515.31             | 0.172                          | 1512.32            | 260.77             |
| A_68_P27311096 | chr10:85379833-85379877                           | NM_181650:-164      | Prdm4      | PROMOTER               | 0.383                                                        | 7.743                          | 1347.35            | 10432.13           | 2.963                          | 1152.25            | 3413.71            |
| A_68_P24513815 | chr6:65728982-65729026                            | NM_027547:49        | Prdm5      | INSIDE                 | 0.014                                                        | 316.300                        | 900.26             | 284753.20          | 4.533                          | 664.10             | 3010.54            |
| A_68_P31713378 | chr18:53623569-53623613                           | NM_001033281:-609   | Prdm6      | PROMOTER               | 0.328                                                        | 0.369                          | 1791.95            | 660.48             | 0.121                          | 1426.89            | 172.47             |
| A_68_P31713385 | chr18:53624187-53624231                           | NM_001033281:9      | Prdm6      | INSIDE                 | 0.471                                                        | 4.147                          | 1866.19            | 7739.13            | 1.952                          | 1508.85            | 2945.29            |

| ProbeName      | Target position of probe on CpG island microarray | TargetID           | GeneSymbol | CpG island Description | Ratio of relative methylation (TiO <sub>2</sub> -NP/Vehicle) | Sham group                     |                    |                    | TiO <sub>2</sub> -H group      |                    |                    |
|----------------|---------------------------------------------------|--------------------|------------|------------------------|--------------------------------------------------------------|--------------------------------|--------------------|--------------------|--------------------------------|--------------------|--------------------|
|                |                                                   |                    |            |                        |                                                              | Relative methylation (Cy5/Cy3) | Cy3 signal (Input) | Cy5 signal (MeDIP) | Relative methylation (Cy5/Cy3) | Cy3 signal (Input) | Cy5 signal (MeDIP) |
| A_68_P23916648 | chr5:98615578-98615622                            | NM_029947:5713     | Prdm8      | INSIDE                 | 0.276                                                        | 0.395                          | 2460.18            | 971.48             | 0.109                          | 1558.51            | 169.79             |
| A_68_P23916646 | chr5:98615304-98615348                            | NM_029947:5439     | Prdm8      | INSIDE                 | 0.457                                                        | 4.574                          | 933.25             | 4268.89            | 2.089                          | 837.89             | 1750.10            |
| A_68_P23916639 | chr5:98614275-98614319                            | NM_029947:4409     | Prdm8      | INSIDE                 | 0.413                                                        | 1.445                          | 3015.19            | 4358.31            | 0.598                          | 2294.59            | 1371.19            |
| A_68_P32227660 | chr19:60950291-60950335                           | NM_007452:129      | Prdx3      | INSIDE                 | 0.563                                                        | 2.641                          | 3903.54            | 10308.49           | 1.487                          | 3244.29            | 4825.19            |
| A_68_P20770872 | chr1:163180941-163180985                          | NM_007453:335      | Prdx6      | INSIDE                 | 0.599                                                        | 3.326                          | 897.81             | 2986.07            | 1.994                          | 842.95             | 1680.63            |
| A_68_P23575728 | chr5:31262393-31262437                            | NM_016703:320      | Preb       | INSIDE                 | 0.471                                                        | 0.378                          | 2531.40            | 956.47             | 0.178                          | 1714.35            | 304.81             |
| A_68_P31652785 | chr18:42110533-42110577                           | NM_029942:294      | Prelid2    | INSIDE                 | 0.469                                                        | 0.416                          | 1733.74            | 721.18             | 0.195                          | 1333.89            | 260.32             |
| A_68_P27109370 | chr10:44787342-44787386                           | NM_011156:345      | Prep       | INSIDE                 | 0.53                                                         | 4.646                          | 964.77             | 4482.79            | 2.463                          | 890.10             | 2191.88            |
| A_68_P21831536 | chr2:166539405-166539449                          | NM_177782:-94      | Prex1      | PROMOTER               | 0.434                                                        | 0.550                          | 13307.77           | 7325.71            | 0.239                          | 8195.33            | 1958.08            |
| A_68_P21831533 | chr2:166539060-166539104                          | NM_177782:250      | Prex1      | INSIDE                 | 0.628                                                        | 0.685                          | 969.04             | 663.77             | 0.43                           | 808.08             | 347.51             |
| A_68_P20029518 | chr1:10983714-10983758                            | NM_029525:191      | Prex2      | INSIDE                 | 0.304                                                        | 17.273                         | 2587.03            | 44685.94           | 5.248                          | 2184.92            | 11466.39           |
| A_68_P20029522 | chr1:10984124-10984168                            | NM_029525:601      | Prex2      | INSIDE                 | 0.467                                                        | 0.158                          | 3225.98            | 510.48             | 0.074                          | 2288.69            | 169.14             |
| A_68_P30447922 | chr15:93426512-93426556                           | NM_001033217:-212  | Prickle1   | PROMOTER               | 0.067                                                        | 62.567                         | 26467.23           | 1655987.00         | 4.22                           | 57745.57           | 243694.80          |
| A_68_P30447388 | chr15:93349565-93349609                           | NM_001033217:76736 | Prickle1   | INSIDE                 | 0.481                                                        | 3.884                          | 2269.48            | 8815.13            | 1.868                          | 1800.37            | 3363.79            |
| A_68_P30447265 | chr15:93331280-93331324                           | NM_001033217:95020 | Prickle1   | INSIDE                 | 0.178                                                        | 3.237                          | 3107.79            | 10059.46           | 0.576                          | 2348.61            | 1352.52            |
| A_68_P30447392 | chr15:93349977-93350021                           | NM_001033217:76324 | Prickle1   | INSIDE                 | 0.294                                                        | 6.314                          | 1269.25            | 8013.82            | 1.856                          | 1192.10            | 2212.87            |
| A_68_P28696317 | chr12:104480189-104480236                         | NM_133364:144      | Prima1     | INSIDE                 | 0.235                                                        | 2.372                          | 5523.18            | 13103.63           | 0.556                          | 3984.60            | 2217.08            |
| A_68_P23176712 | chr4:104782284-104782328                          | NM_178143:197      | Prkaa2     | INSIDE                 | 0.223                                                        | 24.256                         | 12747.99           | 309214.30          | 5.399                          | 15756.39           | 85071.52           |
| A_68_P24012823 | chr5:116474520-116474564                          | NM_031869:-105     | Prkab1     | PROMOTER               | 0.393                                                        | 0.356                          | 3223.01            | 1146.40            | 0.14                           | 2287.23            | 319.64             |
| A_68_P22355467 | chr3:97462102-97462146                            | NM_182997:-10      | Prkab2     | PROMOTER               | 0.279                                                        | 14.890                         | 7856.55            | 116987.80          | 4.159                          | 6926.46            | 28804.75           |
| A_68_P22355468 | chr3:97462189-97462238                            | NM_182997:79       | Prkab2     | INSIDE                 | 0.571                                                        | 2.763                          | 1498.03            | 4138.89            | 1.579                          | 1098.49            | 1734.50            |
| A_68_P22616951 | chr3:146475944-146475988                          | NM_011100:-56      | Prkacb     | PROMOTER               | 0.579                                                        | 4.241                          | 2636.73            | 11181.43           | 2.454                          | 2190.83            | 5376.51            |
| A_68_P23544553 | chr5:24414393-24414437                            | NM_001170555:-87   | Prkag2     | PROMOTER               | 0.445                                                        | 6.232                          | 1345.78            | 8387.03            | 2.774                          | 1158.73            | 3214.87            |
| A_68_P23544552 | chr5:24414202-24414246                            | NM_001170555:103   | Prkag2     | INSIDE                 | 0.448                                                        | 22.387                         | 7731.40            | 173082.90          | 10.028                         | 7038.83            | 70583.25           |
| A_68_P23544551 | chr5:24414128-24414172                            | NM_001170555:177   | Prkag2     | INSIDE                 | 0.569                                                        | 5.815                          | 830.01             | 4826.18            | 3.306                          | 788.55             | 2606.86            |
| A_68_P24133762 | chr5:139605565-139605609                          | NM_008923:120      | Prkar1b    | INSIDE                 | 0.256                                                        | 10.552                         | 4217.40            | 44503.13           | 2.702                          | 3340.18            | 9024.74            |
| A_68_P24133761 | chr5:139605471-139605515                          | NM_008923:214      | Prkar1b    | INSIDE                 | 0.246                                                        | 2.824                          | 4331.48            | 12233.15           | 0.694                          | 3074.04            | 2133.35            |
| A_68_P26816174 | chr9:108594858-108594902                          | NM_008924:407      | Prkar2a    | INSIDE                 | 0.389                                                        | 6.777                          | 1372.64            | 9302.42            | 2.638                          | 1183.89            | 3122.57            |
| A_68_P28334784 | chr12:32745555-32745599                           | NM_011158:568      | Prkar2b    | INSIDE                 | 0.577                                                        | 0.530                          | 7450.17            | 3948.74            | 0.306                          | 5938.26            | 1814.64            |
| A_68_P28334787 | chr12:32745879-32745923                           | NM_011158:244      | Prkar2b    | INSIDE                 | 0.641                                                        | 3.108                          | 1261.42            | 3920.80            | 1.991                          | 1166.18            | 2322.27            |
| A_68_P25478239 | chr7:129432560-129432604                          | NM_008855:-56      | Prkcb      | PROMOTER               | 0.57                                                         | 4.957                          | 632.50             | 3135.11            | 2.825                          | 509.43             | 1439.12            |
| A_68_P29507005 | chr14:31438638-31438682                           | NM_011103:734      | Prkcd      | INSIDE                 | 0.651                                                        | 2.549                          | 5843.10            | 14893.64           | 1.66                           | 4852.86            | 8054.41            |
| A_68_P29507007 | chr14:31438823-31438867                           | NM_011103:550      | Prkcd      | INSIDE                 | 0.115                                                        | 1.496                          | 4483.95            | 6708.90            | 0.172                          | 2856.46            | 490.83             |
| A_68_P25392587 | chr7:112630270-112630314                          | NM_028444:419      | Prkcdbp    | INSIDE                 | 0.382                                                        | 0.463                          | 1357.90            | 628.88             | 0.177                          | 1100.85            | 194.53             |
| A_68_P25392588 | chr7:112630344-112630388                          | NM_028444:345      | Prkcdbp    | INSIDE                 | 0.629                                                        | 6.082                          | 1457.53            | 8864.05            | 3.826                          | 1286.77            | 4923.07            |
| A_68_P31415143 | chr17:86567807-86567851                           | NM_011104:704      | Prkce      | INSIDE                 | 0.399                                                        | 5.725                          | 1678.71            | 9610.37            | 2.287                          | 1401.91            | 3205.98            |
| A_68_P31415139 | chr17:86567438-86567482                           | NM_011104:336      | Prkce      | INSIDE                 | 0.644                                                        | 0.473                          | 1427.23            | 674.44             | 0.304                          | 1127.50            | 343.29             |
| A_68_P28538319 | chr12:74685927-74685971                           | NM_008856:-79      | Prkch      | PROMOTER               | 0.656                                                        | 6.638                          | 437.32             | 2903.11            | 4.355                          | 340.57             | 1483.18            |
| A_68_P28538317 | chr12:74685599-74685643                           | NM_008856:-407     | Prkch      | PROMOTER               | 0.283                                                        | 7.514                          | 414.56             | 3115.17            | 2.126                          | 445.28             | 946.50             |
| A_68_P28426162 | chr12:51750316-51750360                           | NM_008858:-128     | Prkd1      | PROMOTER               | 0.432                                                        | 6.120                          | 4139.04            | 25331.10           | 2.643                          | 3647.40            | 9639.96            |
| A_68_P28426163 | chr12:51750413-51750457                           | NM_008858:-224     | Prkd1      | PROMOTER               | 0.636                                                        | 0.524                          | 1861.64            | 974.69             | 0.333                          | 1598.89            | 532.73             |
| A_68_P24983574 | chr7:17428226-17428270                            | NM_178900:-165     | Prkd2      | PROMOTER               | 0.285                                                        | 0.554                          | 3067.71            | 1700.05            | 0.158                          | 2102.08            | 332.31             |
| A_68_P24983575 | chr7:17428409-17428453                            | NM_178900:19       | Prkd2      | INSIDE                 | 0.425                                                        | 0.388                          | 1361.56            | 528.41             | 0.165                          | 1044.25            | 172.04             |
| A_68_P24983629 | chr7:17441116-17441160                            | NM_178900:12725    | Prkd2      | INSIDE                 | 0.496                                                        | 5.812                          | 872.82             | 5072.69            | 2.882                          | 712.50             | 2053.09            |
| A_68_P24983630 | chr7:17441193-17441237                            | NM_178900:12801    | Prkd2      | INSIDE                 | 0.562                                                        | 3.508                          | 2124.41            | 7453.45            | 1.973                          | 1552.90            | 3063.81            |
| A_68_P31375073 | chr17:79420257-79420301                           | NM_001171004:-122  | Prkd3      | PROMOTER               | 0.182                                                        | 10.151                         | 1153.77            | 11711.84           | 1.85                           | 1224.29            | 2265.17            |

| ProbeName      | Target position of probe on CpG island microarray | TargetID           | GeneSymbol | CpG island Description | Ratio of relative methylation (TiO <sub>2</sub> -NP/Vehicle) | Sham group                     |                    |                    | TiO <sub>2</sub> -H group      |                    |                    |
|----------------|---------------------------------------------------|--------------------|------------|------------------------|--------------------------------------------------------------|--------------------------------|--------------------|--------------------|--------------------------------|--------------------|--------------------|
|                |                                                   |                    |            |                        |                                                              | Relative methylation (Cy5/Cy3) | Cy3 signal (Input) | Cy5 signal (MeDIP) | Relative methylation (Cy5/Cy3) | Cy3 signal (Input) | Cy5 signal (MeDIP) |
| A_68_P30566363 | chr16:15638071-15638115                           | NM_011159:134      | Prkdc      | INSIDE                 | 0.412                                                        | 3.977                          | 1163.16            | 4626.20            | 1.638                          | 995.00             | 1629.82            |
| A_68_P21351539 | chr2:76486029-76486073                            | NM_011871:1        | Prkra      | INSIDE                 | 0.472                                                        | 5.368                          | 1307.62            | 7019.35            | 2.535                          | 1038.94            | 2634.09            |
| A_68_P21351540 | chr2:76486169-76486213                            | NM_011871:-139     | Prkra      | DIVERGENT_PROMOTER     | 0.492                                                        | 0.524                          | 6794.51            | 3560.68            | 0.258                          | 4531.34            | 1169.24            |
| A_68_P21351543 | chr2:76486449-76486493                            | NM_011871:-419     | Prkra      | DIVERGENT_PROMOTER     | 0.131                                                        | 10.790                         | 4736.26            | 51106.26           | 1.409                          | 3883.48            | 5473.54            |
| A_68_P21351534 | chr2:76485547-76485591                            | NM_011871:483      | Prkra      | INSIDE                 | 0.487                                                        | 4.089                          | 491.61             | 2010.32            | 1.993                          | 424.36             | 845.73             |
| A_68_P21351542 | chr2:76486311-76486355                            | NM_011871:-281     | Prkra      | DIVERGENT_PROMOTER     | 0.481                                                        | 2.818                          | 3783.40            | 10662.80           | 1.355                          | 3236.07            | 4383.43            |
| A_68_P24119913 | chr5:136674484-136674528                          | NM_025774:318      | Prkrip1    | INSIDE                 | 0.525                                                        | 0.151                          | 2995.52            | 453.30             | 0.079                          | 2220.05            | 176.22             |
| A_68_P25114625 | chr7:57033846-57033890                            | NM_133740:141      | Prmt3      | INSIDE                 | 0.467                                                        | 3.632                          | 1067.56            | 3877.69            | 1.696                          | 802.62             | 1360.85            |
| A_68_P30577450 | chr16:18088960-18089004                           | NM_011172:301      | Prodh      | INSIDE                 | 0.385                                                        | 6.252                          | 3003.99            | 18781.34           | 2.406                          | 2308.27            | 5552.68            |
| A_68_P30577454 | chr16:18089367-18089416                           | NM_011172:-108     | Prodh      | PROMOTER               | 0.494                                                        | 0.183                          | 2977.65            | 545.31             | 0.09                           | 1920.85            | 173.63             |
| A_68_P30577452 | chr16:18089136-18089180                           | NM_011172:125      | Prodh      | INSIDE                 | 0.605                                                        | 0.449                          | 1627.51            | 730.10             | 0.271                          | 1209.79            | 328.28             |
| A_68_P23649335 | chr5:44492359-44492403                            | NM_001163584:-6373 | Prom1      | PROMOTER               | 0.534                                                        | 2.831                          | 3731.91            | 10565.79           | 1.512                          | 3138.34            | 4745.01            |
| A_68_P25736226 | chr8:28152855-28152901                            | NM_001039077:-148  | Prosc      | PROMOTER               | 0.299                                                        | 13.323                         | 2552.44            | 34006.57           | 3.987                          | 2589.09            | 10322.20           |
| A_68_P25736232 | chr8:28153444-28153488                            | NM_001039077:440   | Prosc      | INSIDE                 | 0.403                                                        | 0.337                          | 1884.48            | 635.32             | 0.136                          | 1345.51            | 182.96             |
| A_68_P21224216 | chr2:53050084-53050128                            | NM_018785:115      | Prpf40a    | INSIDE                 | 0.597                                                        | 0.231                          | 1937.96            | 448.17             | 0.138                          | 1257.64            | 173.68             |
| A_68_P30479249 | chr15:99125815-99125859                           | NM_018786:-3       | Prpf40b    | DIVERGENT_PROMOTER     | 0.339                                                        | 4.173                          | 5198.95            | 21694.89           | 1.414                          | 3515.55            | 4969.87            |
| A_68_P28941009 | chr13:34967839-34967883                           | NM_013830:498      | Prpf4b     | INSIDE                 | 0.604                                                        | 2.386                          | 2106.02            | 5025.49            | 1.442                          | 1716.71            | 2475.53            |
| A_68_P27926352 | chr11:75300162-75300206                           | NM_138659:-94      | Prpf8      | PROMOTER               | 0.369                                                        | 5.512                          | 3080.77            | 16980.74           | 2.032                          | 2544.97            | 5172.46            |
| A_68_P30477986 | chr15:98885749-98885793                           | NM_001163588:166   | Prph       | INSIDE                 | 0.569                                                        | 4.784                          | 981.67             | 4696.14            | 2.722                          | 918.40             | 2500.04            |
| A_68_P30477985 | chr15:98885628-98885672                           | NM_001163588:46    | Prph       | INSIDE                 | 0.6                                                          | 0.530                          | 3488.99            | 1848.15            | 0.318                          | 2482.47            | 788.73             |
| A_68_P28159701 | chr11:116359924-116359968                         | NM_026364:-8286    | Prpsap1    | PROMOTER               | 0.475                                                        | 4.878                          | 3169.25            | 15460.20           | 2.316                          | 2474.88            | 5732.92            |
| A_68_P28159663 | chr11:116351729-116351773                         | NM_026364:-90      | Prpsap1    | PROMOTER               | 0.55                                                         | 22.545                         | 3700.01            | 83415.17           | 12.389                         | 3011.08            | 37305.19           |
| A_68_P25505713 | chr7:134615484-134615528                          | NM_145589:379      | Prr14      | INSIDE                 | 0.25                                                         | 14.476                         | 1950.70            | 28237.49           | 3.617                          | 1999.69            | 7233.34            |
| A_68_P25505707 | chr7:134614706-134614750                          | NM_145589:-399     | Prr14      | PROMOTER               | 0.561                                                        | 0.521                          | 5800.50            | 3024.69            | 0.292                          | 4384.59            | 1282.06            |
| A_68_P25505711 | chr7:134615245-134615289                          | NM_145589:139      | Prr14      | INSIDE                 | 0.653                                                        | 3.043                          | 1226.71            | 3732.73            | 1.988                          | 956.66             | 1901.68            |
| A_68_P32957129 | chr17:8534343-8534387                             | NM_178774:761      | Prr18      | INSIDE                 | 0.457                                                        | 0.371                          | 1374.72            | 510.06             | 0.17                           | 1023.69            | 173.62             |
| A_68_P26760867 | chr9:98743140-98743184                            | NM_001134660:157   | Prr23a     | INSIDE                 | 0.592                                                        | 6.581                          | 2914.61            | 19182.09           | 3.897                          | 2403.08            | 9365.98            |
| A_68_P24980575 | chr7:16858057-16858101                            | NM_001136270:963   | Prr24      | INSIDE                 | 0.407                                                        | 0.539                          | 1474.82            | 795.55             | 0.219                          | 994.31             | 218.04             |
| A_68_P24980579 | chr7:16858527-16858571                            | NM_001136270:493   | Prr24      | INSIDE                 | 0.49                                                         | 0.275                          | 11937.56           | 3284.75            | 0.135                          | 8647.03            | 1164.95            |
| A_68_P31162033 | chr17:36116300-36116344                           | NR_028516:-354     | Prr3       | PROMOTER               | 0.371                                                        | 0.303                          | 1913.26            | 580.52             | 0.112                          | 1542.74            | 173.46             |
| A_68_P31162035 | chr17:36116527-36116571                           | NM_145487:-136     | Prr3       | PROMOTER               | 0.549                                                        | 0.307                          | 2006.16            | 616.67             | 0.169                          | 1613.23            | 272.32             |
| A_68_P31162036 | chr17:36116621-36116665                           | NM_145487:-230     | Prr3       | PROMOTER               | 0.658                                                        | 0.506                          | 995.46             | 504.02             | 0.333                          | 765.90             | 255.13             |
| A_68_P30396220 | chr15:84511228-84511272                           | NM_146061:-177     | Prr5       | PROMOTER               | 0.406                                                        | 0.317                          | 1988.73            | 629.91             | 0.128                          | 1496.23            | 192.18             |
| A_68_P29055232 | chr13:55574226-55574270                           | NM_001030296:8621  | Prr7       | INSIDE                 | 0.192                                                        | 14.894                         | 1414.12            | 21061.62           | 2.861                          | 1088.22            | 3113.78            |
| A_68_P29055171 | chr13:55565839-55565883                           | NM_001030296:233   | Prr7       | INSIDE                 | 0.557                                                        | 0.406                          | 1369.66            | 556.30             | 0.226                          | 1080.16            | 244.58             |
| A_68_P29055227 | chr13:55573644-55573688                           | NM_001030296:8039  | Prr7       | INSIDE                 | 0.615                                                        | 2.588                          | 923.28             | 2389.15            | 1.592                          | 817.01             | 1300.31            |
| A_68_P31735662 | chr18:57522846-57522891                           | NM_028447:8482     | Prrc1      | INSIDE                 | 0.171                                                        | 12.342                         | 2797.48            | 34527.06           | 2.106                          | 2164.47            | 4558.56            |
| A_68_P31157969 | chr17:35293395-35293439                           | NM_001199044:8406  | Prrc2a     | INSIDE                 | 0.218                                                        | 13.444                         | 5312.02            | 71416.80           | 2.929                          | 4431.94            | 12980.25           |
| A_68_P21491162 | chr2:104689920-104689964                          | NM_178695:65       | Prrg4      | INSIDE                 | 0.624                                                        | 3.505                          | 1523.59            | 5340.27            | 2.188                          | 1418.23            | 3103.54            |
| A_68_P21491163 | chr2:104690040-104690084                          | NM_178695:-55      | Prrg4      | PROMOTER               | 0.461                                                        | 0.577                          | 813.25             | 468.97             | 0.266                          | 634.74             | 168.62             |
| A_68_P31154948 | chr17:34769360-34769404                           | NM_030890:2752     | Prrt1      | DOWNSTREAM             | 0.207                                                        | 0.566                          | 1996.44            | 1129.68            | 0.117                          | 1471.41            | 172.00             |
| A_68_P31154933 | chr17:34767732-34767776                           | NM_030890:1124     | Prrt1      | INSIDE                 | 0.336                                                        | 0.532                          | 2637.75            | 1402.42            | 0.179                          | 2147.67            | 383.99             |
| A_68_P31154947 | chr17:34769261-34769305                           | NM_030890:2652     | Prrt1      | DOWNSTREAM             | 0.342                                                        | 5.254                          | 2457.70            | 12913.71           | 1.797                          | 2109.48            | 3789.89            |
| A_68_P25503619 | chr7:134164872-134164916                          | NM_001102563:-169  | Prrt2      | PROMOTER               | 0.644                                                        | 0.471                          | 2117.54            | 996.99             | 0.303                          | 1571.45            | 476.48             |
| A_68_P24325042 | chr6:29129526-29129570                            | NM_001101443:36    | Prrt4      | INSIDE                 | 0.635                                                        | 0.479                          | 967.87             | 463.51             | 0.304                          | 820.40             | 249.62             |
| A_68_P29518733 | chr14:33411046-33411090                           | NM_001001796:-2044 | Prrxl1     | PROMOTER               | 0.398                                                        | 4.082                          | 2020.46            | 8246.63            | 1.625                          | 1713.66            | 2784.89            |

| ProbeName      | Target position of probe on CpG island microarray | TargetID           | GeneSymbol | CpG island Description | Ratio of relative methylation (TiO <sub>2</sub> -NP/Vehicle) | Sham group                     |                    |                    | TiO <sub>2</sub> -H group      |                    |                    |
|----------------|---------------------------------------------------|--------------------|------------|------------------------|--------------------------------------------------------------|--------------------------------|--------------------|--------------------|--------------------------------|--------------------|--------------------|
|                |                                                   |                    |            |                        |                                                              | Relative methylation (Cy5/Cy3) | Cy3 signal (Input) | Cy5 signal (MeDIP) | Relative methylation (Cy5/Cy3) | Cy3 signal (Input) | Cy5 signal (MeDIP) |
| A_68_P28875767 | chr13:22097925-22097969                           | NM_019429:3664     | Prss16     | INSIDE                 | 0.26                                                         | 9.874                          | 1177.53            | 11627.21           | 2.565                          | 1158.86            | 2972.50            |
| A_68_P25508222 | chr7:135079466-135079510                          | NM_001081374:10751 | Prss36     | INSIDE                 | 0.518                                                        | 8.155                          | 1726.95            | 14083.44           | 4.222                          | 1652.41            | 6977.25            |
| A_68_P26826274 | chr9:110760774-110760818                          | NM_146227:326      | Prss50     | INSIDE                 | 0.437                                                        | 0.683                          | 889.64             | 607.70             | 0.298                          | 810.72             | 241.99             |
| A_68_P25017609 | chr7:28293338-28293382                            | NM_019412:9018     | Prx        | INSIDE                 | 0.63                                                         | 0.134                          | 5077.72            | 678.81             | 0.084                          | 3445.19            | 290.23             |
| A_68_P25017608 | chr7:28293225-28293269                            | NM_019412:8904     | Prx        | INSIDE                 | 0.282                                                        | 0.638                          | 15571.94           | 9930.58            | 0.18                           | 9846.51            | 1771.96            |
| A_68_P32143181 | chr19:46392296-46392341                           | NM_028627:9328     | Psd        | INSIDE                 | 0.241                                                        | 9.651                          | 1811.96            | 17488.09           | 2.329                          | 1495.30            | 3482.84            |
| A_68_P31621137 | chr18:36124949-36124993                           | NM_028707:482      | Psd2       | INSIDE                 | 0.557                                                        | 0.452                          | 1129.83            | 510.59             | 0.252                          | 780.76             | 196.47             |
| A_68_P20874688 | chr1:182186063-182186107                          | NM_001128605:347   | Psen2      | INSIDE                 | 0.625                                                        | 0.586                          | 4354.86            | 2550.75            | 0.366                          | 3079.78            | 1127.23            |
| A_68_P23062645 | chr4:83131826-83131870                            | NM_133948:446      | Psp1       | INSIDE                 | 0.647                                                        | 3.379                          | 1664.25            | 5622.74            | 2.187                          | 1451.95            | 3175.41            |
| A_68_P28523608 | chr12:72076024-72076068                           | NM_011184:437      | Psma3      | INSIDE                 | 0.576                                                        | 3.539                          | 714.66             | 2529.47            | 2.037                          | 695.08             | 1416.17            |
| A_68_P28523609 | chr12:72076112-72076156                           | NM_011184:525      | Psma3      | INSIDE                 | 0.58                                                         | 2.688                          | 1281.28            | 3444.17            | 1.56                           | 1022.93            | 1595.42            |
| A_68_P28451632 | chr12:56500204-56500248                           | NM_011968:415      | Psma6      | INSIDE                 | 0.388                                                        | 0.533                          | 1213.14            | 646.26             | 0.207                          | 1074.15            | 222.00             |
| A_68_P31065956 | chr17:15635037-15635081                           | NM_011185:182      | Psmb1      | INSIDE                 | 0.331                                                        | 7.976                          | 3653.45            | 29141.72           | 2.643                          | 2916.48            | 7708.56            |
| A_68_P31065957 | chr17:15635193-15635237                           | NM_011185:26       | Psmb1      | INSIDE                 | 0.557                                                        | 0.406                          | 1102.11            | 447.29             | 0.226                          | 790.56             | 178.63             |
| A_68_P23281396 | chr4:126355179-126355223                          | NM_011970:314      | Psmb2      | INSIDE                 | 0.56                                                         | 0.645                          | 1304.87            | 841.78             | 0.362                          | 1047.34            | 378.65             |
| A_68_P22341205 | chr3:94690730-94690774                            | NM_008945:128      | Psmb4      | INSIDE                 | 0.561                                                        | 3.582                          | 1841.01            | 6594.36            | 2.009                          | 1459.49            | 2931.97            |
| A_68_P21149539 | chr2:38499296-38499340                            | NM_011187:108      | Psmb7      | INSIDE                 | 0.235                                                        | 0.470                          | 1748.77            | 822.77             | 0.111                          | 1588.08            | 175.55             |
| A_68_P21149540 | chr2:38499397-38499441                            | NM_011187:8        | Psmb7      | INSIDE                 | 0.306                                                        | 6.449                          | 2094.85            | 13509.21           | 1.974                          | 1752.46            | 3458.58            |
| A_68_P28679987 | chr12:101348579-101348623                         | NM_008947:-1940    | Psmc1      | PROMOTER               | 0.546                                                        | 0.571                          | 938.05             | 535.98             | 0.312                          | 889.56             | 277.61             |
| A_68_P21420369 | chr2:90894125-90894169                            | NM_008948:-26      | Psmc3      | PROMOTER               | 0.096                                                        | 39.443                         | 16104.40           | 635204.20          | 3.804                          | 23468.94           | 89268.29           |
| A_68_P29419901 | chr14:14953551-14953595                           | NM_025550:-154     | Psmc6      | PROMOTER               | 0.287                                                        | 13.566                         | 693.19             | 9403.92            | 3.892                          | 891.07             | 3467.88            |
| A_68_P30990393 | chr16:96212588-96212632                           | NM_019537:-100     | Psmg1      | PROMOTER               | 0.245                                                        | 12.247                         | 2005.04            | 24555.50           | 3.005                          | 1726.16            | 5186.85            |
| A_68_P28936994 | chr13:34255135-34255179                           | NM_001101430:311   | Psmg4      | INSIDE                 | 0.373                                                        | 1.794                          | 3594.63            | 6448.61            | 0.669                          | 2840.65            | 1900.19            |
| A_68_P29624689 | chr14:57396463-57396507                           | NM_025682:669      | Pspc1      | INSIDE                 | 0.185                                                        | 22.333                         | 4565.37            | 101958.30          | 4.133                          | 4138.28            | 17104.60           |
| A_68_P24090826 | chr5:130293163-130293207                          | NM_133900:-55      | Psph       | DIVERGENT_PROMOTER     | 0.391                                                        | 7.070                          | 1853.85            | 13107.54           | 2.765                          | 1590.58            | 4398.32            |
| A_68_P31849787 | chr18:78033303-78033347                           | NM_013831:36       | Pstpip2    | INSIDE                 | 0.66                                                         | 0.170                          | 3874.13            | 658.57             | 0.112                          | 2827.84            | 317.10             |
| A_68_P31849791 | chr18:78033691-78033735                           | NM_013831:424      | Pstpip2    | INSIDE                 | 0.359                                                        | 1.876                          | 5810.60            | 10900.82           | 0.673                          | 3986.54            | 2683.68            |
| A_68_P32019128 | chr19:23762244-23762288                           | NM_028208:377      | Ptar1      | INSIDE                 | 0.447                                                        | 0.619                          | 1848.52            | 1144.46            | 0.277                          | 1450.49            | 401.64             |
| A_68_P22467635 | chr3:119486116-119486160                          | NM_019550:168      | Ptbp2      | INSIDE                 | 0.551                                                        | 0.695                          | 1495.59            | 1039.80            | 0.383                          | 1184.60            | 453.97             |
| A_68_P29094155 | chr13:63664480-63664524                           | NM_008957:2326     | Ptch1      | INSIDE                 | 0.274                                                        | 12.316                         | 1113.69            | 13716.51           | 3.37                           | 1015.86            | 3423.88            |
| A_68_P29094163 | chr13:63665381-63665425                           | NM_008957:1426     | Ptch1      | INSIDE                 | 0.586                                                        | 4.077                          | 2328.57            | 9493.97            | 2.391                          | 1676.42            | 4008.77            |
| A_68_P29094157 | chr13:63664712-63664756                           | NM_008957:2094     | Ptch1      | INSIDE                 | 0.631                                                        | 0.534                          | 1691.12            | 903.48             | 0.337                          | 1329.87            | 448.24             |
| A_68_P29094159 | chr13:63664958-63665003                           | NM_008957:1848     | Ptch1      | INSIDE                 | 0.608                                                        | 0.602                          | 1122.76            | 675.98             | 0.366                          | 865.33             | 316.92             |
| A_68_P32760538 | chrX:152057229-152057273                          | NM_001093750:620   | Ptchd1     | INSIDE                 | 0.328                                                        | 24.528                         | 2249.38            | 55173.80           | 8.057                          | 2267.62            | 18270.83           |
| A_68_P32760547 | chrX:152058267-152058311                          | NM_001093750:-418  | Ptchd1     | PROMOTER               | 0.436                                                        | 3.512                          | 765.63             | 2688.62            | 1.531                          | 949.26             | 1453.77            |
| A_68_P23393512 | chr4:147662081-147662125                          | NM_001083342:-28   | Ptchd2     | PROMOTER               | 0.245                                                        | 7.494                          | 1581.12            | 11848.32           | 1.833                          | 1406.69            | 2578.68            |
| A_68_P25586914 | chr7:148317021-148317066                          | NM_013782:-141     | Ptdss2     | PROMOTER               | 0.52                                                         | 3.345                          | 1810.92            | 6056.80            | 1.739                          | 1545.29            | 2686.94            |
| A_68_P25586915 | chr7:148317107-148317151                          | NM_013782:-56      | Ptdss2     | PROMOTER               | 0.657                                                        | 2.616                          | 1046.76            | 2738.14            | 1.718                          | 952.74             | 1637.02            |
| A_68_P32071916 | chr19:32830947-32830991                           | NM_008960:-1098    | Pten       | PROMOTER               | 0.467                                                        | 0.107                          | 5322.53            | 569.82             | 0.05                           | 3777.15            | 189.03             |
| A_68_P32071925 | chr19:32832040-32832084                           | NM_008960:-4       | Pten       | PROMOTER               | 0.661                                                        | 0.521                          | 2336.66            | 1217.86            | 0.344                          | 1674.36            | 576.78             |
| A_68_P32071915 | chr19:32830782-32830826                           | NM_008960:-1262    | Pten       | PROMOTER               | 0.588                                                        | 0.607                          | 1109.11            | 672.77             | 0.357                          | 873.77             | 311.80             |
| A_68_P21044973 | chr2:19367231-19367275                            | NM_018809:-37      | Ptfla      | PROMOTER               | 0.591                                                        | 2.858                          | 786.86             | 2248.95            | 1.688                          | 684.27             | 1155.26            |
| A_68_P26015929 | chr8:86192596-86192640                            | NM_013641:2080     | Ptger1     | INSIDE                 | 0.459                                                        | 11.587                         | 5305.56            | 61475.54           | 5.315                          | 4602.21            | 24461.88           |
| A_68_P22680840 | chr3:157229758-157229802                          | NM_011196:-75      | Ptger3     | PROMOTER               | 0.278                                                        | 9.755                          | 1604.12            | 15648.43           | 2.714                          | 1358.23            | 3686.42            |
| A_68_P21115159 | chr2:32252005-32252049                            | NM_133783:617      | Ptges2     | INSIDE                 | 0.592                                                        | 3.019                          | 903.74             | 2728.84            | 1.787                          | 776.13             | 1387.31            |
| A_68_P22373271 | chr3:100914318-100914362                          | NM_011197:-251     | Ptgifn     | PROMOTER               | 0.48                                                         | 3.067                          | 1807.95            | 5544.68            | 1.471                          | 1414.66            | 2081.29            |

| ProbeName      | Target position of probe on CpG island microarray | TargetID           | GeneSymbol | CpG island Description | Ratio of relative methylation (TiO <sub>2</sub> -NP/Vehicle) | Sham group                     |                    |                    | TiO <sub>2</sub> -H group      |                    |                    |
|----------------|---------------------------------------------------|--------------------|------------|------------------------|--------------------------------------------------------------|--------------------------------|--------------------|--------------------|--------------------------------|--------------------|--------------------|
|                |                                                   |                    |            |                        |                                                              | Relative methylation (Cy5/Cy3) | Cy3 signal (Input) | Cy5 signal (MeDIP) | Relative methylation (Cy5/Cy3) | Cy3 signal (Input) | Cy5 signal (MeDIP) |
| A_68_P21834483 | chr2:167066012-167066056                          | NM_008968:3        | Ptgis      | INSIDE                 | 0.541                                                        | 0.216                          | 2353.51            | 507.95             | 0.117                          | 1497.47            | 174.96             |
| A_68_P21834481 | chr2:167065786-167065830                          | NM_008968:229      | Ptgis      | INSIDE                 | 0.573                                                        | 0.349                          | 1877.66            | 655.51             | 0.2                            | 1519.30            | 304.12             |
| A_68_P26825469 | chr9:110629781-110629825                          | NM_001083936:15312 | Pth1r      | INSIDE                 | 0.152                                                        | 2.996                          | 6180.74            | 18515.58           | 0.454                          | 4290.88            | 1949.83            |
| A_68_P26825587 | chr9:110645381-110645425                          | NM_001083936:-288  | Pth1r      | PROMOTER               | 0.536                                                        | 0.273                          | 2266.20            | 618.67             | 0.146                          | 1496.12            | 219.12             |
| A_68_P26825589 | chr9:110645592-110645636                          | NM_001083936:-500  | Pth1r      | PROMOTER               | 0.613                                                        | 0.258                          | 2146.88            | 554.64             | 0.158                          | 1721.26            | 272.41             |
| A_68_P26825596 | chr9:110646504-110646548                          | NM_001083935:-336  | Pth1r      | PROMOTER               | 0.624                                                        | 0.398                          | 1593.26            | 633.92             | 0.248                          | 1178.52            | 292.71             |
| A_68_P26825588 | chr9:110645482-110645526                          | NM_001083936:-390  | Pth1r      | PROMOTER               | 0.524                                                        | 0.683                          | 3623.83            | 2475.84            | 0.358                          | 2691.32            | 964.34             |
| A_68_P26825597 | chr9:110646599-110646643                          | NM_001083935:-430  | Pth1r      | PROMOTER               | 0.624                                                        | 0.730                          | 2240.81            | 1636.05            | 0.456                          | 1744.84            | 795.52             |
| A_68_P26825466 | chr9:110629375-110629419                          | NM_001083936:15718 | Pth1r      | INSIDE                 | 0.323                                                        | 5.052                          | 2738.63            | 13836.13           | 1.634                          | 1975.78            | 3228.94            |
| A_68_P25091647 | chr7:52436916-52436960                            | NM_053256:574      | Pth2       | INSIDE                 | 0.27                                                         | 0.524                          | 5418.87            | 2837.03            | 0.141                          | 3563.08            | 502.95             |
| A_68_P25091653 | chr7:52437711-52437755                            | NM_053256:1368     | Pth2       | DOWNSTREAM             | 0.509                                                        | 4.641                          | 650.08             | 3017.13            | 2.363                          | 500.39             | 1182.28            |
| A_68_P30330337 | chr15:73253106-73253150                           | NM_007982:493      | Ptk2       | INSIDE                 | 0.468                                                        | 0.176                          | 5904.49            | 1039.96            | 0.082                          | 4155.07            | 342.66             |
| A_68_P30330343 | chr15:73253736-73253780                           | NM_007982:-137     | Ptk2       | PROMOTER               | 0.488                                                        | 7.856                          | 792.60             | 6226.57            | 3.836                          | 657.85             | 2523.38            |
| A_68_P31207975 | chr17:46766402-46766446                           | NM_175168:29       | Ptk7       | INSIDE                 | 0.525                                                        | 5.271                          | 13135.56           | 69237.90           | 2.766                          | 10620.74           | 29374.66           |
| A_68_P20412593 | chr1:88422665-88422709                            | NM_008972:-624     | Ptma       | PROMOTER               | 0.27                                                         | 20.385                         | 3696.88            | 75360.08           | 5.511                          | 4036.99            | 22249.27           |
| A_68_P20412615 | chr1:88425095-88425139                            | NM_008972:1806     | Ptma       | INSIDE                 | 0.645                                                        | 0.372                          | 1629.33            | 605.92             | 0.24                           | 1127.57            | 270.47             |
| A_68_P20412584 | chr1:88421724-88421768                            | NM_008972:-1564    | Ptma       | PROMOTER               | 0.508                                                        | 0.615                          | 1238.92            | 762.29             | 0.313                          | 1014.25            | 317.15             |
| A_68_P20412608 | chr1:88424274-88424318                            | NM_008972:986      | Ptma       | INSIDE                 | 0.601                                                        | 2.884                          | 904.77             | 2609.45            | 1.735                          | 819.47             | 1421.37            |
| A_68_P25089823 | chr7:52124557-52124601                            | NM_133949:580      | Ptov1      | INSIDE                 | 0.095                                                        | 5.857                          | 2930.64            | 17164.45           | 0.554                          | 2284.77            | 1264.67            |
| A_68_P23298639 | chr4:129497779-129497823                          | NM_001164745:-151  | Ptp4a2     | PROMOTER               | 0.3                                                          | 6.461                          | 1710.26            | 11049.71           | 1.938                          | 1463.73            | 2836.24            |
| A_68_P23298637 | chr4:129497229-129497273                          | NM_008974:-472     | Ptp4a2     | PROMOTER               | 0.578                                                        | 2.917                          | 1696.06            | 4948.18            | 1.687                          | 1367.31            | 2307.32            |
| A_68_P21019042 | chr2:13977187-13977231                            | NM_001012396:454   | Ptpla      | INSIDE                 | 0.287                                                        | 0.570                          | 9012.69            | 5135.50            | 0.164                          | 6283.10            | 1028.73            |
| A_68_P26585377 | chr9:64869052-64869096                            | NM_021345:450      | Ptplad1    | INSIDE                 | 0.422                                                        | 0.480                          | 1106.41            | 531.29             | 0.203                          | 921.68             | 186.97             |
| A_68_P30667506 | chr16:35022484-35022528                           | NM_023587:0        | Ptplb      | INSIDE                 | 0.272                                                        | 7.707                          | 1215.68            | 9369.57            | 2.093                          | 1096.32            | 2294.46            |
| A_68_P21838403 | chr2:167758113-167758157                          | NM_011201:308      | Ptpn1      | INSIDE                 | 0.208                                                        | 0.532                          | 2119.88            | 1126.99            | 0.11                           | 1551.62            | 171.31             |
| A_68_P23524104 | chr5:20561279-20561323                            | NM_011203:315      | Ptpn12     | INSIDE                 | 0.314                                                        | 7.917                          | 1336.21            | 10578.73           | 2.487                          | 1184.48            | 2945.80            |
| A_68_P23524108 | chr5:20561799-20561843                            | NM_011203:-205     | Ptpn12     | PROMOTER               | 0.441                                                        | 4.907                          | 4378.04            | 21484.22           | 2.165                          | 3302.39            | 7149.40            |
| A_68_P20927655 | chr1:191551708-191551752                          | NM_008976:-416     | Ptpn14     | PROMOTER               | 0.376                                                        | 0.224                          | 2807.97            | 627.62             | 0.084                          | 2038.12            | 171.50             |
| A_68_P20927662 | chr1:191552465-191552509                          | NM_008976:340      | Ptpn14     | INSIDE                 | 0.436                                                        | 0.546                          | 1055.36            | 576.04             | 0.238                          | 870.99             | 207.07             |
| A_68_P28671530 | chr12:99927621-99927665                           | NM_011877:45213    | Ptpn21     | INSIDE                 | 0.366                                                        | 5.755                          | 1592.79            | 9167.12            | 2.107                          | 1186.26            | 2499.97            |
| A_68_P28671841 | chr12:99975831-99975875                           | NM_001146199:-237  | Ptpn21     | DIVERGENT_PROMOTER     | 0.399                                                        | 9.478                          | 3886.78            | 36838.76           | 3.784                          | 3072.85            | 11627.72           |
| A_68_P22944675 | chr4:57313204-57313248                            | NM_011207:1483     | Ptpn3      | INSIDE                 | 0.459                                                        | 7.311                          | 701.42             | 5128.13            | 3.353                          | 652.13             | 2186.31            |
| A_68_P25103254 | chr7:54387461-54387505                            | NM_001163565:486   | Ptpn5      | INSIDE                 | 0.071                                                        | 31.574                         | 1838.90            | 58061.76           | 2.228                          | 1616.12            | 3601.49            |
| A_68_P26539664 | chr9:56843551-56843595                            | NM_019651:798      | Ptpn9      | INSIDE                 | 0.552                                                        | 3.374                          | 621.79             | 2098.15            | 1.863                          | 513.05             | 955.63             |
| A_68_P21629885 | chr2:130276440-130276484                          | NM_001163688:449   | Ptpnra     | INSIDE                 | 0.435                                                        | 0.334                          | 1630.16            | 543.85             | 0.145                          | 1326.95            | 192.54             |
| A_68_P27474704 | chr10:115738319-115738363                         | NM_029928:-89      | Ptpnrb     | PROMOTER               | 0.127                                                        | 1.579                          | 1921.57            | 3033.58            | 0.2                            | 1870.32            | 373.78             |
| A_68_P23029295 | chr4:76095885-76095929                            | NM_011211:144297   | Ptpnrd     | INSIDE                 | 0.295                                                        | 16.882                         | 2196.77            | 37086.54           | 4.979                          | 1636.13            | 8145.78            |
| A_68_P25553144 | chr7:142729766-142729810                          | NM_011212:282      | Ptpnre     | INSIDE                 | 0.652                                                        | 0.595                          | 2166.38            | 1289.60            | 0.388                          | 1802.32            | 699.57             |
| A_68_P23238885 | chr4:117884835-117884879                          | NM_011213:79146    | Ptpnrf     | INSIDE                 | 0.173                                                        | 22.297                         | 2032.58            | 45320.75           | 3.854                          | 1528.96            | 5893.29            |
| A_68_P23239476 | chr4:117963343-117963387                          | NM_011213:638      | Ptpnrf     | INSIDE                 | 0.443                                                        | 6.586                          | 1180.45            | 7774.63            | 2.92                           | 1100.41            | 3213.53            |
| A_68_P29405439 | chr14:12386172-12386216                           | NM_008981:128      | Ptpnrg     | INSIDE                 | 0.448                                                        | 0.466                          | 2390.49            | 1114.81            | 0.209                          | 1790.31            | 374.14             |
| A_68_P29405441 | chr14:12386359-12386403                           | NM_008981:314      | Ptpnrg     | INSIDE                 | 0.544                                                        | 0.718                          | 1461.88            | 1050.01            | 0.391                          | 1182.67            | 462.35             |
| A_68_P21417962 | chr2:90420971-90421015                            | NM_008982:-188     | Ptpnrj     | PROMOTER               | 0.178                                                        | 15.593                         | 2553.41            | 39814.77           | 2.769                          | 2156.20            | 5971.22            |
| A_68_P21417961 | chr2:90420785-90420829                            | NM_008982:-2       | Ptpnrj     | PROMOTER               | 0.476                                                        | 13.553                         | 652.91             | 8849.08            | 6.455                          | 523.13             | 3376.75            |
| A_68_P21417957 | chr2:90420274-90420318                            | NM_008982:508      | Ptpnrj     | INSIDE                 | 0.532                                                        | 4.627                          | 1854.70            | 8580.82            | 2.463                          | 1521.14            | 3746.38            |
| A_68_P21417960 | chr2:90420716-90420760                            | NM_008982:66       | Ptpnrj     | INSIDE                 | 0.635                                                        | 7.816                          | 1205.37            | 9421.14            | 4.962                          | 1031.43            | 5118.41            |

| ProbeName      | Target position of probe on CpG island microarray | TargetID          | GeneSymbol | CpG island Description | Ratio of relative methylation (TiO <sub>2</sub> -NP/Vehicle) | Sham group                     |                    |                    | TiO <sub>2</sub> -H group      |                    |                    |
|----------------|---------------------------------------------------|-------------------|------------|------------------------|--------------------------------------------------------------|--------------------------------|--------------------|--------------------|--------------------------------|--------------------|--------------------|
|                |                                                   |                   |            |                        |                                                              | Relative methylation (Cy5/Cy3) | Cy3 signal (Input) | Cy5 signal (MeDIP) | Relative methylation (Cy5/Cy3) | Cy3 signal (Input) | Cy5 signal (MeDIP) |
| A_68_P31311926 | chr17:67704196-67704240                           | NM_008984:-419    | Ptpm       | PROMOTER               | 0.326                                                        | 21.269                         | 2942.60            | 62587.27           | 6.94                           | 2719.79            | 18874.76           |
| A_68_P31311922 | chr17:67703725-67703769                           | NM_008984:53      | Ptpm       | INSIDE                 | 0.47                                                         | 15.356                         | 1640.96            | 25198.52           | 7.214                          | 1433.44            | 10340.11           |
| A_68_P31311916 | chr17:67703103-67703147                           | NM_008984:675     | Ptpm       | INSIDE                 | 0.487                                                        | 0.526                          | 1615.27            | 848.97             | 0.256                          | 1246.50            | 318.89             |
| A_68_P31311920 | chr17:67703577-67703621                           | NM_008984:201     | Ptpm       | INSIDE                 | 0.648                                                        | 0.532                          | 1152.25            | 612.48             | 0.344                          | 886.52             | 305.37             |
| A_68_P31311912 | chr17:67702632-67702676                           | NM_008984:1145    | Ptpm       | INSIDE                 | 0.608                                                        | 0.676                          | 976.11             | 660.18             | 0.411                          | 815.63             | 335.26             |
| A_68_P20352935 | chr1:75248212-75248256                            | NM_008985:12549   | Ptpm       | INSIDE                 | 0.538                                                        | 4.043                          | 2186.64            | 8840.29            | 2.174                          | 1735.38            | 3772.70            |
| A_68_P28768143 | chr12:117724447-117724491                         | NM_011215:276     | Ptpm2      | INSIDE                 | 0.157                                                        | 39.030                         | 3862.17            | 150741.30          | 6.123                          | 3124.72            | 19133.84           |
| A_68_P24877027 | chr6:137200894-137200938                          | NM_001164401:97   | Ptpro      | INSIDE                 | 0.251                                                        | 21.881                         | 4116.11            | 90062.86           | 5.485                          | 3529.44            | 19359.62           |
| A_68_P31256054 | chr17:56568541-56568585                           | NM_011218:47341   | Ptprs      | INSIDE                 | 0.118                                                        | 18.760                         | 1854.56            | 34791.94           | 2.216                          | 1462.99            | 3242.15            |
| A_68_P31256434 | chr17:56615114-56615158                           | NM_011218:767     | Ptprs      | INSIDE                 | 0.171                                                        | 0.455                          | 10481.57           | 4768.19            | 0.078                          | 6163.81            | 480.21             |
| A_68_P31255958 | chr17:56556525-56556570                           | NM_011218:59356   | Ptprs      | INSIDE                 | 0.306                                                        | 7.555                          | 3642.57            | 27518.50           | 2.31                           | 2378.09            | 5493.44            |
| A_68_P31256336 | chr17:56601995-56602039                           | NM_011218:13887   | Ptprs      | INSIDE                 | 0.448                                                        | 0.411                          | 7479.27            | 3072.71            | 0.184                          | 5055.17            | 930.14             |
| A_68_P31256333 | chr17:56601586-56601630                           | NM_011218:14295   | Ptprs      | INSIDE                 | 0.584                                                        | 3.575                          | 883.06             | 3156.54            | 2.086                          | 746.97             | 1558.44            |
| A_68_P31256024 | chr17:56564825-56564869                           | NM_011218:51057   | Ptprs      | INSIDE                 | 0.566                                                        | 2.728                          | 1088.07            | 2968.67            | 1.545                          | 994.21             | 1536.05            |
| A_68_P31256047 | chr17:56567658-56567702                           | NM_011218:48223   | Ptprs      | INSIDE                 | 0.494                                                        | 3.219                          | 942.82             | 3035.25            | 1.591                          | 732.83             | 1166.01            |
| A_68_P23308580 | chr4:131392321-131392365                          | NM_001083119:1851 | Ptpm       | INSIDE                 | 0.527                                                        | 4.544                          | 3074.25            | 13969.52           | 2.394                          | 2555.44            | 6118.88            |
| A_68_P23308588 | chr4:131393415-131393459                          | NM_001083119:757  | Ptpm       | INSIDE                 | 0.624                                                        | 2.811                          | 16370.49           | 46015.01           | 1.754                          | 9681.65            | 16981.78           |
| A_68_P23308584 | chr4:131392713-131392757                          | NM_001083119:1459 | Ptpm       | INSIDE                 | 0.648                                                        | 0.631                          | 11428.85           | 7210.40            | 0.409                          | 5778.40            | 2361.17            |
| A_68_P28071212 | chr11:100830764-100830808                         | NM_008986:1145    | Ptprf      | INSIDE                 | 0.155                                                        | 1.737                          | 8427.13            | 14637.97           | 0.269                          | 5612.01            | 1508.29            |
| A_68_P28071210 | chr11:100830506-100830550                         | NM_008986:1403    | Ptprf      | INSIDE                 | 0.224                                                        | 1.764                          | 4296.44            | 7580.02            | 0.395                          | 3356.42            | 1325.66            |
| A_68_P28071133 | chr11:100820100-100820144                         | NM_008986:11809   | Ptprf      | INSIDE                 | 0.643                                                        | 5.573                          | 2471.99            | 13777.32           | 3.586                          | 1786.65            | 6406.05            |
| A_68_P28071211 | chr11:100830670-100830714                         | NM_008986:1239    | Ptprf      | INSIDE                 | 0.321                                                        | 0.733                          | 6925.73            | 5076.71            | 0.235                          | 4409.15            | 1037.16            |
| A_68_P31622955 | chr18:36441203-36441247                           | NM_008989:409     | Pura       | INSIDE                 | 0.636                                                        | 0.743                          | 3289.40            | 2444.45            | 0.473                          | 2347.88            | 1109.82            |
| A_68_P25768631 | chr8:34496720-34496764                            | NM_152821:-54     | Purg       | DIVERGENT_PROMOTER     | 0.633                                                        | 0.213                          | 7604.72            | 1620.37            | 0.135                          | 5221.15            | 704.12             |
| A_68_P23441284 | chr4:155265872-155265916                          | NM_001033490:-23  | Pusl1      | DIVERGENT_PROMOTER     | 0.392                                                        | 4.679                          | 1864.53            | 8724.33            | 1.832                          | 1739.03            | 3185.79            |
| A_68_P23441280 | chr4:155265412-155265456                          | NM_001033490:437  | Pusl1      | INSIDE                 | 0.647                                                        | 0.664                          | 2371.53            | 1574.93            | 0.43                           | 1733.88            | 745.04             |
| A_68_P26463567 | chr9:43552486-43552530                            | NM_021424:-150    | Pvr11      | PROMOTER               | 0.436                                                        | 0.500                          | 2207.24            | 1104.63            | 0.218                          | 1747.47            | 381.46             |
| A_68_P26463576 | chr9:43553455-43553499                            | NM_021424:818     | Pvr11      | INSIDE                 | 0.255                                                        | 7.258                          | 1255.96            | 9115.18            | 1.85                           | 1066.43            | 1973.30            |
| A_68_P26464017 | chr9:43611785-43611829                            | NM_021424:59148   | Pvr11      | INSIDE                 | 0.13                                                         | 15.039                         | 1229.29            | 18486.93           | 1.962                          | 634.95             | 1245.57            |
| A_68_P26464016 | chr9:43611710-43611754                            | NM_021424:59074   | Pvr11      | INSIDE                 | 0.148                                                        | 10.161                         | 1775.58            | 18041.40           | 1.506                          | 1216.62            | 1831.86            |
| A_68_P24995078 | chr7:20334418-20334462                            | NM_008990:482     | Pvr12      | INSIDE                 | 0.013                                                        | 8.208                          | 3838.47            | 31507.40           | 0.107                          | 2499.01            | 267.74             |
| A_68_P24995082 | chr7:20334905-20334949                            | NM_008990:-4      | Pvr12      | PROMOTER               | 0.394                                                        | 0.608                          | 5012.37            | 3048.37            | 0.24                           | 3979.00            | 953.42             |
| A_68_P24995083 | chr7:20334983-20335030                            | NM_008990:-84     | Pvr12      | PROMOTER               | 0.557                                                        | 0.537                          | 3948.80            | 2118.90            | 0.299                          | 2623.64            | 783.68             |
| A_68_P24995084 | chr7:20335086-20335130                            | NM_008990:-186    | Pvr12      | PROMOTER               | 0.662                                                        | 0.598                          | 2208.44            | 1320.34            | 0.396                          | 1521.52            | 602.11             |
| A_68_P24995077 | chr7:20334338-20334382                            | NM_008990:562     | Pvr12      | INSIDE                 | 0.146                                                        | 1.554                          | 1154.21            | 1793.13            | 0.227                          | 774.53             | 175.66             |
| A_68_P27310783 | chr10:85334508-85334552                           | NM_133993:-45     | Pwp1       | PROMOTER               | 0.358                                                        | 11.249                         | 2174.07            | 24455.18           | 4.029                          | 2079.98            | 8380.80            |
| A_68_P23978770 | chr5:110715093-110715137                          | NM_008993:73      | Pxmp2      | INSIDE                 | 0.056                                                        | 32.431                         | 1785.94            | 57920.70           | 1.811                          | 1789.91            | 3240.72            |
| A_68_P23978771 | chr5:110715204-110715248                          | NM_008993:-39     | Pxmp2      | DIVERGENT_PROMOTER     | 0.393                                                        | 4.675                          | 1469.93            | 6871.59            | 1.837                          | 1256.84            | 2308.33            |
| A_68_P20878434 | chr1:182834646-182834690                          | NM_133705:264     | Pycr2      | INSIDE                 | 0.544                                                        | 4.099                          | 736.36             | 3018.69            | 2.23                           | 577.16             | 1286.79            |
| A_68_P21740964 | chr2:150612823-150612867                          | NM_153781:313     | Pygb       | INSIDE                 | 0.445                                                        | 10.068                         | 1373.12            | 13823.87           | 4.483                          | 1330.42            | 5964.12            |
| A_68_P28519206 | chr12:71328237-71328281                           | NM_133198:412     | Pygl       | INSIDE                 | 0.664                                                        | 0.383                          | 1611.91            | 617.39             | 0.254                          | 1245.88            | 316.95             |
| A_68_P26630339 | chr9:72773100-72773144                            | NM_028116:-334    | Pygo1      | PROMOTER               | 0.351                                                        | 3.918                          | 2863.66            | 11220.02           | 1.376                          | 2332.82            | 3209.57            |
| A_68_P22319359 | chr3:89234506-89234550                            | NM_026869:-230    | Pygo2      | PROMOTER               | 0.266                                                        | 13.992                         | 3052.05            | 42702.78           | 3.726                          | 2686.95            | 10011.19           |
| A_68_P28077570 | chr11:101968399-101968443                         | NM_145435:670     | Pyy        | INSIDE                 | 0.409                                                        | 0.554                          | 826.81             | 458.46             | 0.227                          | 776.13             | 175.82             |
| A_68_P31375199 | chr17:79451854-79451898                           | NM_027455:631     | Qpct       | INSIDE                 | 0.464                                                        | 0.341                          | 1413.98            | 482.52             | 0.158                          | 1063.43            | 168.26             |
| A_68_P31375202 | chr17:79452069-79452113                           | NM_027455:845     | Qpct       | INSIDE                 | 0.486                                                        | 3.967                          | 1952.77            | 7747.16            | 1.926                          | 1842.85            | 3550.21            |

| ProbeName      | Target position of probe on CpG island microarray | TargetID          | GeneSymbol | CpG island Description | Ratio of relative methylation (TiO <sub>2</sub> -NP/Vehicle) | Sham group                     |                    |                    | TiO <sub>2</sub> -H group      |                    |                    |
|----------------|---------------------------------------------------|-------------------|------------|------------------------|--------------------------------------------------------------|--------------------------------|--------------------|--------------------|--------------------------------|--------------------|--------------------|
|                |                                                   |                   |            |                        |                                                              | Relative methylation (Cy5/Cy3) | Cy3 signal (Input) | Cy5 signal (MeDIP) | Relative methylation (Cy5/Cy3) | Cy3 signal (Input) | Cy5 signal (MeDIP) |
| A_68_P26815242 | chr9:108420124-108420168                          | NM_001114119:729  | Qrich1     | INSIDE                 | 0.546                                                        | 0.234                          | 3745.43            | 875.06             | 0.128                          | 2787.63            | 355.73             |
| A_68_P26815232 | chr9:108418960-108419004                          | NM_001114119:-435 | Qrich1     | PROMOTER               | 0.556                                                        | 2.966                          | 2243.87            | 6654.63            | 1.648                          | 1630.32            | 2686.18            |
| A_68_P21490977 | chr2:104656727-104656771                          | NM_001123327:105  | Qser1      | INSIDE                 | 0.181                                                        | 45.786                         | 3159.56            | 144665.00          | 8.309                          | 2661.15            | 22112.38           |
| A_68_P21077278 | chr2:26093092-26093136                            | NM_153559:-174    | Qsox2      | PROMOTER               | 0.443                                                        | 1.670                          | 5176.58            | 8643.49            | 0.74                           | 3858.13            | 2854.55            |
| A_68_P29696766 | chr14:70107048-70107092                           | NM_001146012:317  | R3hcc1     | INSIDE                 | 0.504                                                        | 0.387                          | 1434.31            | 554.51             | 0.195                          | 1219.93            | 237.47             |
| A_68_P20598625 | chr1:129999853-129999897                          | NM_181750:-8      | R3hdm1     | DIVERGENT_PROMOTER     | 0.32                                                         | 8.714                          | 3510.52            | 30589.00           | 2.788                          | 2870.45            | 8001.90            |
| A_68_P20598628 | chr1:130000152-130000196                          | NM_181750:292     | R3hdm1     | INSIDE                 | 0.381                                                        | 5.412                          | 1253.63            | 6784.43            | 2.061                          | 1082.73            | 2231.16            |
| A_68_P28194540 | chr12:3309680-3309724                             | NM_016676:267     | Rab10      | INSIDE                 | 0.184                                                        | 15.532                         | 1571.80            | 24412.68           | 2.859                          | 1436.06            | 4105.69            |
| A_68_P25737020 | chr8:28284902-28284946                            | NM_001080813:194  | Rab11fip1  | INSIDE                 | 0.589                                                        | 0.689                          | 2103.30            | 1448.70            | 0.405                          | 1769.79            | 717.52             |
| A_68_P31107657 | chr17:26122228-26122272                           | NM_153140:36555   | Rab11fip3  | DOWNSTREAM             | 0.596                                                        | 0.700                          | 1470.29            | 1028.85            | 0.417                          | 1300.03            | 541.87             |
| A_68_P27949793 | chr11:79404552-79404596                           | NM_175543:-139    | Rab11fip4  | PROMOTER               | 0.531                                                        | 4.497                          | 1258.89            | 5661.57            | 2.39                           | 1083.23            | 2589.20            |
| A_68_P24604715 | chr6:85324050-85324094                            | NM_001003955:556  | Rab11fip5  | INSIDE                 | 0.575                                                        | 19.701                         | 3005.45            | 59209.63           | 11.326                         | 3246.19            | 36767.77           |
| A_68_P31306704 | chr17:66868707-66868751                           | NM_024448:282     | Rab12      | INSIDE                 | 0.107                                                        | 1.895                          | 2003.75            | 3796.23            | 0.204                          | 1459.60            | 297.06             |
| A_68_P31306703 | chr17:66868585-66868629                           | NM_024448:404     | Rab12      | INSIDE                 | 0.496                                                        | 0.378                          | 1786.40            | 675.84             | 0.188                          | 1223.00            | 229.37             |
| A_68_P31306702 | chr17:66868481-66868525                           | NM_024448:508     | Rab12      | INSIDE                 | 0.556                                                        | 0.376                          | 3041.87            | 1142.50            | 0.209                          | 2194.83            | 458.04             |
| A_68_P22323989 | chr3:90024711-90024755                            | NM_026677:-6      | Rab13      | DIVERGENT_PROMOTER     | 0.526                                                        | 0.694                          | 3254.29            | 2257.40            | 0.365                          | 2310.95            | 843.67             |
| A_68_P21132198 | chr2:35056008-35056052                            | NM_026697:610     | Rab14      | INSIDE                 | 0.409                                                        | 5.832                          | 1437.36            | 8382.91            | 2.386                          | 1042.47            | 2487.45            |
| A_68_P21132202 | chr2:35056385-35056429                            | NM_026697:234     | Rab14      | INSIDE                 | 0.648                                                        | 3.448                          | 3263.21            | 11251.83           | 2.236                          | 2668.65            | 5966.79            |
| A_68_P27468929 | chr10:114752147-114752191                         | NM_024454:479     | Rab21      | INSIDE                 | 0.659                                                        | 2.641                          | 819.51             | 2164.61            | 1.739                          | 645.14             | 1122.22            |
| A_68_P21871012 | chr2:173485328-173485372                          | NM_024436:5       | Rab22a     | INSIDE                 | 0.08                                                         | 25.437                         | 1141.67            | 29040.85           | 2.035                          | 1861.28            | 3787.47            |
| A_68_P29054323 | chr13:55423060-55423104                           | NM_009000:259     | Rab24      | INSIDE                 | 0.45                                                         | 4.973                          | 2008.43            | 9987.92            | 2.236                          | 1618.64            | 3619.89            |
| A_68_P29054322 | chr13:55422929-55422973                           | NM_009000:391     | Rab24      | INSIDE                 | 0.542                                                        | 0.321                          | 4235.05            | 1359.66            | 0.174                          | 3169.38            | 551.05             |
| A_68_P31807637 | chr18:70212806-70212850                           | NM_030554:195     | Rab27b     | INSIDE                 | 0.621                                                        | 0.573                          | 1332.73            | 763.07             | 0.356                          | 1142.22            | 406.28             |
| A_68_P22715106 | chr4:8463176-8463220                              | NM_021518:408     | Rab2a      | INSIDE                 | 0.356                                                        | 6.577                          | 1279.04            | 8412.38            | 2.34                           | 1226.77            | 2870.52            |
| A_68_P29605724 | chr14:52898950-52898996                           | NM_172601:98      | Rab2b      | INSIDE                 | 0.485                                                        | 0.648                          | 1498.74            | 970.80             | 0.314                          | 1058.95            | 332.69             |
| A_68_P29605620 | chr14:52877501-52877545                           | NM_172601:21548   | Rab2b      | DOWNSTREAM             | 0.509                                                        | 3.582                          | 601.77             | 2155.26            | 1.822                          | 511.31             | 931.66             |
| A_68_P31302582 | chr17:66121758-66121802                           | NM_133685:312     | Rab31      | INSIDE                 | 0.331                                                        | 6.405                          | 5430.81            | 34783.59           | 2.121                          | 4432.75            | 9401.57            |
| A_68_P31302584 | chr17:66121929-66121973                           | NM_133685:142     | Rab31      | INSIDE                 | 0.477                                                        | 9.646                          | 2594.50            | 25026.92           | 4.601                          | 2155.74            | 9917.68            |
| A_68_P26936200 | chr10:10277608-10277652                           | NM_026405:375     | Rab32      | INSIDE                 | 0.612                                                        | 0.400                          | 5005.76            | 2002.88            | 0.245                          | 3827.58            | 937.46             |
| A_68_P22129906 | chr3:51287666-51287710                            | NM_016858:-199    | Rab33b     | PROMOTER               | 0.364                                                        | 8.169                          | 3235.80            | 26433.17           | 2.978                          | 2825.05            | 8411.60            |
| A_68_P22129907 | chr3:51287845-51287889                            | NM_016858:-21     | Rab33b     | PROMOTER               | 0.446                                                        | 3.977                          | 1831.64            | 7285.32            | 1.773                          | 1491.40            | 2644.31            |
| A_68_P27941849 | chr11:78002317-78002361                           | NM_033475:89      | Rab34      | INSIDE                 | 0.357                                                        | 1.691                          | 1645.39            | 2782.65            | 0.603                          | 1233.96            | 744.57             |
| A_68_P26522114 | chr9:53513817-53513861                            | NM_175562:499     | Rab39      | INSIDE                 | 0.442                                                        | 0.330                          | 1581.68            | 522.71             | 0.146                          | 1199.61            | 175.24             |
| A_68_P26522120 | chr9:53514529-53514573                            | NM_175562:-213    | Rab39      | PROMOTER               | 0.545                                                        | 0.515                          | 3118.70            | 1605.21            | 0.281                          | 2233.35            | 626.66             |
| A_68_P25953806 | chr8:73278838-73278882                            | NM_001166399:283  | Rab3a      | INSIDE                 | 0.605                                                        | 0.201                          | 5085.85            | 1021.64            | 0.121                          | 3013.76            | 365.99             |
| A_68_P23198163 | chr4:108551696-108551740                          | NM_023537:44      | Rab3b      | INSIDE                 | 0.596                                                        | 2.524                          | 1214.08            | 3064.80            | 1.504                          | 1173.22            | 1764.30            |
| A_68_P26349531 | chr9:21722321-21722365                            | NM_031874:223     | Rab3d      | INSIDE                 | 0.479                                                        | 5.379                          | 1023.10            | 5503.36            | 2.576                          | 798.60             | 2057.10            |
| A_68_P26349532 | chr9:21722448-21722492                            | NM_031874:95      | Rab3d      | INSIDE                 | 0.429                                                        | 0.750                          | 3737.57            | 2804.05            | 0.322                          | 2775.73            | 892.49             |
| A_68_P26349533 | chr9:21722608-21722652                            | NM_031874:-65     | Rab3d      | PROMOTER               | 0.464                                                        | 3.060                          | 4098.24            | 12542.05           | 1.421                          | 2943.62            | 4182.59            |
| A_68_P20597394 | chr1:129765721-129765775                          | NM_178690:399     | Rab3gap1   | INSIDE                 | 0.537                                                        | 0.664                          | 793.43             | 526.68             | 0.357                          | 646.33             | 230.60             |
| A_68_P31947893 | chr19:10092733-10092777                           | NM_144538:37      | Rab3il1    | INSIDE                 | 0.598                                                        | 3.651                          | 2743.61            | 10016.55           | 2.184                          | 2107.93            | 4604.76            |
| A_68_P27478502 | chr10:116386947-116386991                         | NM_001003950:468  | Rab3ip     | INSIDE                 | 0.435                                                        | 0.419                          | 1339.14            | 561.26             | 0.182                          | 1107.99            | 201.79             |
| A_68_P24618289 | chr6:87762138-87762182                            | NM_001039394:-387 | Rab43      | PROMOTER               | 0.471                                                        | 0.452                          | 4179.28            | 1889.82            | 0.213                          | 2791.44            | 594.32             |
| A_68_P24618284 | chr6:87761631-87761675                            | NM_133717:-1904   | Rab43      | PROMOTER               | 0.55                                                         | 7.961                          | 4332.47            | 34492.59           | 4.378                          | 3934.41            | 17225.35           |
| A_68_P27542730 | chr10:128133098-128133142                         | NM_177411:204     | Rab5b      | INSIDE                 | 0.343                                                        | 0.502                          | 1345.14            | 675.09             | 0.172                          | 1169.94            | 201.22             |
| A_68_P27542729 | chr10:128133023-128133067                         | NM_177411:280     | Rab5b      | INSIDE                 | 0.415                                                        | 4.627                          | 2910.18            | 13464.68           | 1.921                          | 2311.04            | 4439.93            |

| ProbeName      | Target position of probe on CpG island microarray | TargetID           | GeneSymbol | CpG island Description | Ratio of relative methylation (TiO <sub>2</sub> -NP/Vehicle) | Sham group                     |                    |                    | TiO <sub>2</sub> -H group      |                    |                    |
|----------------|---------------------------------------------------|--------------------|------------|------------------------|--------------------------------------------------------------|--------------------------------|--------------------|--------------------|--------------------------------|--------------------|--------------------|
|                |                                                   |                    |            |                        |                                                              | Relative methylation (Cy5/Cy3) | Cy3 signal (Input) | Cy5 signal (MeDIP) | Relative methylation (Cy5/Cy3) | Cy3 signal (Input) | Cy5 signal (MeDIP) |
| A_68_P26783902 | chr9:103014760-103014804                          | NM_173781:379      | Rab6b      | INSIDE                 | 0.273                                                        | 1.941                          | 4529.23            | 8792.63            | 0.53                           | 3167.67            | 1679.24            |
| A_68_P26783904 | chr9:103014963-103015007                          | NM_173781:581      | Rab6b      | INSIDE                 | 0.384                                                        | 13.872                         | 2587.22            | 35888.99           | 5.33                           | 2774.85            | 14791.03           |
| A_68_P25959941 | chr8:74685000-74685047                            | NM_023126:-75      | Rab8a      | PROMOTER               | 0.494                                                        | 0.315                          | 1637.31            | 515.70             | 0.156                          | 1121.68            | 174.52             |
| A_68_P25959940 | chr8:74684842-74684886                            | NM_023126:-234     | Rab8a      | PROMOTER               | 0.496                                                        | 0.284                          | 3172.28            | 900.18             | 0.141                          | 2139.17            | 301.03             |
| A_68_P27902925 | chr11:70658259-70658303                           | NM_019400:16       | Rabep1     | INSIDE                 | 0.649                                                        | 2.421                          | 2013.55            | 4873.95            | 1.57                           | 1686.88            | 2648.14            |
| A_68_P25500413 | chr7:133572890-133572934                          | NM_030566:632      | Rabep2     | INSIDE                 | 0.392                                                        | 0.342                          | 4851.39            | 1659.45            | 0.134                          | 3439.45            | 460.69             |
| A_68_P21142183 | chr2:37307736-37307780                            | NM_001033960:-15   | Rabgap1    | PROMOTER               | 0.446                                                        | 9.916                          | 3651.58            | 36208.05           | 4.42                           | 3192.94            | 14113.65           |
| A_68_P21142185 | chr2:37307958-37308002                            | NM_001033960:207   | Rabgap1    | INSIDE                 | 0.517                                                        | 0.739                          | 1990.50            | 1470.13            | 0.382                          | 1526.11            | 583.26             |
| A_68_P24092504 | chr5:130647587-130647631                          | NM_001199059:-80   | Rabgef1    | PROMOTER               | 0.446                                                        | 5.519                          | 1321.64            | 7294.70            | 2.46                           | 1152.48            | 2835.23            |
| A_68_P29619514 | chr14:56341028-56341072                           | NM_019519:-37      | Rabgga     | PROMOTER               | 0.082                                                        | 5.023                          | 1571.51            | 7893.49            | 0.411                          | 1273.96            | 524.04             |
| A_68_P29619515 | chr14:56341110-56341154                           | NM_019519:-119     | Rabgga     | PROMOTER               | 0.662                                                        | 2.278                          | 1268.43            | 2889.57            | 1.509                          | 1039.85            | 1568.81            |
| A_68_P30426169 | chr15:89422304-89422348                           | NM_026817:28       | Rabl2      | INSIDE                 | 0.652                                                        | 4.513                          | 1153.57            | 5206.58            | 2.941                          | 867.27             | 2550.53            |
| A_68_P24156969 | chr5:144288624-144288668                          | NM_009007:215      | Rac1       | INSIDE                 | 0.537                                                        | 4.608                          | 1857.37            | 8558.74            | 2.473                          | 1369.78            | 3387.22            |
| A_68_P28186391 | chr11:120582930-120582974                         | NM_133223:171      | Rac3       | INSIDE                 | 0.554                                                        | 3.314                          | 2214.97            | 7340.34            | 1.836                          | 1588.72            | 2916.56            |
| A_68_P30010836 | chr15:10415930-10415974                           | NM_011232:164      | Rad1       | INSIDE                 | 0.389                                                        | 0.584                          | 1494.98            | 873.51             | 0.228                          | 1244.27            | 283.15             |
| A_68_P30213989 | chr15:51823378-51823422                           | NM_009009:-94      | Rad21      | PROMOTER               | 0.524                                                        | 3.868                          | 720.05             | 2785.36            | 2.029                          | 634.52             | 1287.29            |
| A_68_P22933509 | chr4:55363107-55363151                            | NM_009011:215      | Rad23b     | INSIDE                 | 0.237                                                        | 1.662                          | 2784.46            | 4626.53            | 0.394                          | 2165.64            | 853.14             |
| A_68_P22933503 | chr4:55362594-55362638                            | NM_009011:-297     | Rad23b     | PROMOTER               | 0.643                                                        | 3.209                          | 1822.31            | 5848.06            | 2.064                          | 1614.64            | 3332.82            |
| A_68_P22933507 | chr4:55362962-55363006                            | NM_009011:71       | Rad23b     | INSIDE                 | 0.589                                                        | 0.506                          | 1152.14            | 583.35             | 0.298                          | 908.97             | 271.28             |
| A_68_P27806202 | chr11:53520643-53520687                           | NM_009012:157      | Rad50      | INSIDE                 | 0.541                                                        | 0.658                          | 1028.88            | 676.59             | 0.356                          | 919.09             | 327.11             |
| A_68_P28238663 | chr12:11462730-11462774                           | NM_001111118:-132  | Rad51ap2   | PROMOTER               | 0.617                                                        | 3.567                          | 3579.91            | 12769.26           | 2.2                            | 3008.78            | 6618.02            |
| A_68_P24152257 | chr5:143026729-143026773                          | NM_178702:281      | Radil      | INSIDE                 | 0.532                                                        | 4.652                          | 2326.96            | 10824.39           | 2.476                          | 1967.65            | 4871.76            |
| A_68_P21867064 | chr2:172826009-172826053                          | NM_175112:413      | Rae1       | INSIDE                 | 0.432                                                        | 0.477                          | 1207.13            | 576.20             | 0.206                          | 956.24             | 197.21             |
| A_68_P26997097 | chr10:21871019-21871063                           | NM_009016:-7374    | Raet1a     | PROMOTER               | 0.209                                                        | 2.399                          | 3269.75            | 7844.94            | 0.501                          | 2489.50            | 1248.33            |
| A_68_P27840810 | chr11:59919914-59919958                           | NM_009021:1422     | Rail       | INSIDE                 | 0.371                                                        | 19.625                         | 3112.25            | 61079.23           | 7.289                          | 2474.58            | 18038.22           |
| A_68_P27840803 | chr11:59919168-59919212                           | NM_009021:676      | Rail       | INSIDE                 | 0.374                                                        | 0.259                          | 5814.91            | 1506.59            | 0.097                          | 4461.44            | 432.26             |
| A_68_P27841039 | chr11:59953284-59953328                           | NM_001037764:-277  | Rail       | PROMOTER               | 0.456                                                        | 0.338                          | 1719.66            | 581.33             | 0.154                          | 1427.86            | 220.01             |
| A_68_P27840799 | chr11:59918534-59918578                           | NM_009021:42       | Rail       | INSIDE                 | 0.507                                                        | 0.474                          | 2690.56            | 1276.21            | 0.241                          | 1759.41            | 423.15             |
| A_68_P27840800 | chr11:59918733-59918777                           | NM_009021:240      | Rail       | INSIDE                 | 0.539                                                        | 5.901                          | 691.86             | 4082.82            | 3.179                          | 631.31             | 2007.20            |
| A_68_P27840876 | chr11:59928639-59928683                           | NM_009021:10146    | Rail       | INSIDE                 | 0.612                                                        | 0.280                          | 3296.34            | 922.72             | 0.171                          | 2453.15            | 420.12             |
| A_68_P27841325 | chr11:59989438-59989482                           | NM_001037764:35877 | Rail       | INSIDE                 | 0.459                                                        | 0.715                          | 1814.75            | 1298.26            | 0.328                          | 1397.10            | 458.66             |
| A_68_P30012295 | chr15:10643929-10643973                           | NM_030690:-655     | Rail4      | PROMOTER               | 0.567                                                        | 0.359                          | 3987.37            | 1433.16            | 0.204                          | 2959.65            | 602.96             |
| A_68_P30012299 | chr15:10644337-10644381                           | NM_030690:-1063    | Rail4      | PROMOTER               | 0.543                                                        | 3.680                          | 634.83             | 2336.20            | 2                              | 465.60             | 931.11             |
| A_68_P20557414 | chr1:121401510-121401554                          | NM_022327:-173     | Ralb       | PROMOTER               | 0.556                                                        | 0.351                          | 2120.98            | 745.37             | 0.195                          | 1577.09            | 308.12             |
| A_68_P21782731 | chr2:158236154-158236198                          | NM_177658:588      | Ralgapb    | INSIDE                 | 0.124                                                        | 15.145                         | 2329.18            | 35274.44           | 1.884                          | 1970.53            | 3711.95            |
| A_68_P21782725 | chr2:158235581-158235625                          | NM_177658:14       | Ralgapb    | INSIDE                 | 0.398                                                        | 6.776                          | 1218.48            | 8256.97            | 2.7                            | 1210.16            | 3267.65            |
| A_68_P21119569 | chr2:32985913-32985957                            | NM_175211:241064   | Ralgs1     | DOWNSTREAM             | 0.534                                                        | 0.664                          | 4351.26            | 2890.99            | 0.355                          | 3222.92            | 1143.76            |
| A_68_P21762357 | chr2:154616385-154616429                          | NM_001139511:-439  | Raly       | PROMOTER               | 0.371                                                        | 0.363                          | 5694.62            | 2065.65            | 0.134                          | 4512.46            | 606.63             |
| A_68_P21762364 | chr2:154617306-154617350                          | NM_001139511:483   | Raly       | INSIDE                 | 0.481                                                        | 22.124                         | 3048.25            | 67440.53           | 10.651                         | 2679.44            | 28537.50           |
| A_68_P21762360 | chr2:154616838-154616882                          | NM_001139511:15    | Raly       | INSIDE                 | 0.493                                                        | 4.964                          | 2336.39            | 11598.55           | 2.447                          | 1863.53            | 4560.55            |
| A_68_P21762359 | chr2:154616708-154616752                          | NM_001139511:-115  | Raly       | PROMOTER               | 0.489                                                        | 0.621                          | 3190.50            | 1980.02            | 0.303                          | 2437.02            | 739.23             |
| A_68_P28072819 | chr11:101107662-101107706                         | NM_019444:37       | Ramp2      | INSIDE                 | 0.358                                                        | 6.202                          | 402.02             | 2493.37            | 2.218                          | 436.22             | 967.62             |
| A_68_P24086565 | chr5:129526623-129526667                          | NM_009391:614      | Ran        | INSIDE                 | 0.484                                                        | 7.038                          | 1680.94            | 11830.84           | 3.405                          | 1272.35            | 4331.77            |
| A_68_P24086564 | chr5:129526514-129526558                          | NM_009391:506      | Ran        | INSIDE                 | 0.518                                                        | 8.228                          | 1861.13            | 15313.54           | 4.258                          | 1650.36            | 7027.68            |
| A_68_P30578589 | chr16:18248400-18248444                           | NM_011239:365      | Ranbp1     | INSIDE                 | 0.655                                                        | 2.574                          | 2608.12            | 6714.49            | 1.686                          | 2123.74            | 3580.20            |
| A_68_P27163773 | chr10:57909758-57909803                           | NM_011240:181      | Ranbp2     | INSIDE                 | 0.332                                                        | 5.402                          | 1144.20            | 6180.90            | 1.795                          | 995.21             | 1786.33            |



| ProbeName      | Target position of probe on CpG island microarray | TargetID            | GeneSymbol | CpG island Description | Ratio of relative methylation (TiO <sub>2</sub> -NP/Vehicle) | Sham group                     |                    |                    | TiO <sub>2</sub> -H group      |                    |                    |
|----------------|---------------------------------------------------|---------------------|------------|------------------------|--------------------------------------------------------------|--------------------------------|--------------------|--------------------|--------------------------------|--------------------|--------------------|
|                |                                                   |                     |            |                        |                                                              | Relative methylation (Cy5/Cy3) | Cy3 signal (Input) | Cy5 signal (MeDIP) | Relative methylation (Cy5/Cy3) | Cy3 signal (Input) | Cy5 signal (MeDIP) |
| A_68_P27163774 | chr10:57909910-57909954                           | NM_011240:333       | Ranbp2     | INSIDE                 | 0.412                                                        | 1.450                          | 1306.65            | 1894.56            | 0.597                          | 1120.44            | 669.26             |
| A_68_P32054982 | chr19:29887617-29887661                           | NM_177721:-174      | Ranbp6     | PROMOTER               | 0.604                                                        | 0.365                          | 1461.18            | 533.17             | 0.22                           | 788.52             | 173.70             |
| A_68_P27921006 | chr11:74335943-74335987                           | NM_001015046:67696  | Rap1gap2   | INSIDE                 | 0.43                                                         | 0.517                          | 2375.82            | 1227.66            | 0.222                          | 1862.75            | 413.67             |
| A_68_P22572454 | chr3:138738598-138738642                          | NM_001040690:-457   | Rap1gds1   | PROMOTER               | 0.298                                                        | 20.616                         | 1476.65            | 30442.31           | 6.135                          | 1401.36            | 8597.68            |
| A_68_P22572455 | chr3:138738714-138738758                          | NM_001040690:-573   | Rap1gds1   | PROMOTER               | 0.448                                                        | 0.392                          | 1708.32            | 669.76             | 0.175                          | 1382.05            | 242.54             |
| A_68_P22572447 | chr3:138737478-138737522                          | NM_001040690:663    | Rap1gds1   | INSIDE                 | 0.567                                                        | 4.597                          | 2377.80            | 10930.75           | 2.606                          | 2042.14            | 5321.26            |
| A_68_P22182581 | chr3:61168376-61168420                            | NM_028712:-30       | Rap2b      | PROMOTER               | 0.38                                                         | 8.436                          | 4310.45            | 36363.72           | 3.209                          | 3282.49            | 10532.29           |
| A_68_P32374346 | chrX:48371757-48371801                            | NM_172413:-583      | Rap2c      | PROMOTER               | 0.583                                                        | 4.521                          | 833.89             | 3770.41            | 2.634                          | 959.94             | 2528.28            |
| A_68_P21099264 | chr2:29603006-29603050                            | NM_001039086:127789 | Rapgef1    | DOWNSTREAM             | 0.553                                                        | 3.111                          | 1565.20            | 4870.10            | 1.721                          | 1286.63            | 2214.83            |
| A_68_P21099263 | chr2:29602898-29602942                            | NM_001039086:127681 | Rapgef1    | DOWNSTREAM             | 0.101                                                        | 4.569                          | 1108.67            | 5065.63            | 0.46                           | 989.32             | 454.99             |
| A_68_P28774232 | chr12:118772473-118772517                         | NM_175930:17543     | Rapgef5    | INSIDE                 | 0.527                                                        | 4.272                          | 746.29             | 3188.01            | 2.252                          | 618.89             | 1393.44            |
| A_68_P27810583 | chr11:54336349-54336393                           | NM_175258:22        | Rapgef6    | INSIDE                 | 0.649                                                        | 3.179                          | 1124.78            | 3575.78            | 2.064                          | 877.71             | 1811.57            |
| A_68_P28058844 | chr11:98698263-98698307                           | NM_001080925:186    | Rapgef11   | INSIDE                 | 0.457                                                        | 4.779                          | 2950.56            | 14099.85           | 2.185                          | 2197.43            | 4800.73            |
| A_68_P28058842 | chr11:98698054-98698098                           | NM_001080925:-22    | Rapgef11   | PROMOTER               | 0.079                                                        | 8.711                          | 5231.71            | 45574.25           | 0.691                          | 3934.93            | 2719.37            |
| A_68_P20269871 | chr1:60624074-60624118                            | NM_001045513:-487   | Raph1      | PROMOTER               | 0.61                                                         | 0.304                          | 1545.57            | 469.47             | 0.185                          | 1094.11            | 202.73             |
| A_68_P28059422 | chr11:98797644-98797688                           | NM_009024:-1343     | Rara       | PROMOTER               | 0.045                                                        | 8.229                          | 2727.20            | 22442.87           | 0.374                          | 2038.18            | 762.41             |
| A_68_P28059604 | chr11:98821830-98821874                           | NM_001176528:68     | Rara       | INSIDE                 | 0.22                                                         | 43.731                         | 2510.01            | 109764.20          | 9.62                           | 2442.25            | 23493.43           |
| A_68_P28059432 | chr11:98798988-98799032                           | NM_001177302:-21    | Rara       | PROMOTER               | 0.442                                                        | 0.367                          | 1564.13            | 573.69             | 0.162                          | 1247.35            | 202.23             |
| A_68_P28059420 | chr11:98797438-98797483                           | NM_009024:-1549     | Rara       | PROMOTER               | 0.213                                                        | 3.016                          | 1978.17            | 5966.04            | 0.643                          | 1557.56            | 1002.11            |
| A_68_P29430092 | chr14:17408235-17408279                           | NM_011243:-532      | Rarb       | PROMOTER               | 0.613                                                        | 0.204                          | 3111.01            | 636.14             | 0.125                          | 2515.90            | 315.30             |
| A_68_P29430091 | chr14:17408166-17408210                           | NM_011243:-464      | Rarb       | PROMOTER               | 0.557                                                        | 0.702                          | 1593.38            | 1119.32            | 0.391                          | 1302.44            | 509.67             |
| A_68_P29430090 | chr14:17408053-17408097                           | NM_011243:-350      | Rarb       | PROMOTER               | 0.269                                                        | 0.694                          | 1190.95            | 826.73             | 0.186                          | 915.27             | 170.66             |
| A_68_P30496837 | chr15:102077508-102077552                         | NM_001042727:-747   | Rarg       | PROMOTER               | 0.421                                                        | 0.455                          | 2924.92            | 1329.53            | 0.191                          | 2294.99            | 439.03             |
| A_68_P30496838 | chr15:102077585-102077629                         | NM_001042727:-823   | Rarg       | PROMOTER               | 0.605                                                        | 0.451                          | 1825.25            | 822.34             | 0.272                          | 1483.54            | 404.16             |
| A_68_P30496912 | chr15:102087767-102087811                         | NM_011244:126       | Rarg       | INSIDE                 | 0.424                                                        | 3.472                          | 1312.65            | 4557.58            | 1.471                          | 1214.45            | 1786.48            |
| A_68_P27708863 | chr11:35648179-35648223                           | NM_025936:-170      | Rars       | PROMOTER               | 0.426                                                        | 5.002                          | 1445.96            | 7233.07            | 2.132                          | 1142.09            | 2435.26            |
| A_68_P26747582 | chr9:96437440-96437484                            | NM_053268:94460     | Rasa2      | DOWNSTREAM             | 0.324                                                        | 5.321                          | 1565.13            | 8328.03            | 1.725                          | 1389.25            | 2396.74            |
| A_68_P25669970 | chr8:13676888-13676932                            | NM_009025:677       | Rasa3      | INSIDE                 | 0.328                                                        | 6.096                          | 2021.53            | 12322.74           | 1.998                          | 1412.47            | 2822.00            |
| A_68_P25669976 | chr8:13677580-13677624                            | NM_009025:-15       | Rasa3      | PROMOTER               | 0.634                                                        | 4.600                          | 1489.45            | 6850.75            | 2.915                          | 1326.36            | 3866.78            |
| A_68_P24040030 | chr5:121099321-121099365                          | NM_013832:512       | Rasal1     | INSIDE                 | 0.346                                                        | 5.941                          | 6050.80            | 35950.15           | 2.058                          | 4897.56            | 10077.57           |
| A_68_P20748460 | chr1:159342861-159342905                          | NM_177644:-156      | Rasal2     | PROMOTER               | 0.52                                                         | 0.633                          | 3665.67            | 2318.90            | 0.329                          | 2803.36            | 922.10             |
| A_68_P25972618 | chr8:77737845-77737889                            | NM_029182:24        | Rasd2      | INSIDE                 | 0.106                                                        | 38.638                         | 1291.79            | 49912.11           | 4.104                          | 1050.47            | 4311.43            |
| A_68_P25972617 | chr8:77737759-77737803                            | NM_029182:-62       | Rasd2      | PROMOTER               | 0.522                                                        | 3.635                          | 1357.60            | 4934.54            | 1.896                          | 1194.94            | 2265.59            |
| A_68_P25972612 | chr8:77737217-77737261                            | NM_029182:-604      | Rasd2      | PROMOTER               | 0.365                                                        | 0.579                          | 1023.01            | 592.77             | 0.212                          | 821.80             | 173.95             |
| A_68_P23018376 | chr4:73436995-73437039                            | NM_001017427:-510   | Rasef      | PROMOTER               | 0.189                                                        | 38.609                         | 1435.83            | 55435.42           | 7.296                          | 1153.76            | 8418.16            |
| A_68_P23922674 | chr5:99681727-99681771                            | NM_145839:198       | Rasgef1b   | INSIDE                 | 0.538                                                        | 2.721                          | 2087.72            | 5680.22            | 1.463                          | 1807.65            | 2644.07            |
| A_68_P26714906 | chr9:89805323-89805367                            | NM_001039655:732    | Rasgrf1    | INSIDE                 | 0.585                                                        | 0.318                          | 2720.21            | 864.88             | 0.186                          | 2131.34            | 396.44             |
| A_68_P29222291 | chr13:92901092-92901136                           | NM_009027:335       | Rasgrf2    | INSIDE                 | 0.395                                                        | 0.582                          | 1094.37            | 636.64             | 0.23                           | 846.82             | 194.52             |
| A_68_P21557415 | chr2:117168712-117168756                          | NM_011246:-121      | Rasgrp1    | PROMOTER               | 0.623                                                        | 0.383                          | 1740.34            | 665.95             | 0.239                          | 1362.08            | 324.93             |
| A_68_P21557414 | chr2:117168572-117168616                          | NM_011246:19        | Rasgrp1    | INSIDE                 | 0.432                                                        | 4.147                          | 715.72             | 2967.99            | 1.791                          | 616.99             | 1105.31            |
| A_68_P31934467 | chr19:6399578-6399622                             | NM_011242:-982      | Rasgrp2    | PROMOTER               | 0.302                                                        | 13.734                         | 2666.65            | 36622.50           | 4.15                           | 2457.35            | 10198.32           |
| A_68_P31934550 | chr19:6413237-6413281                             | NM_011242:12676     | Rasgrp2    | INSIDE                 | 0.33                                                         | 5.098                          | 4443.36            | 22652.63           | 1.685                          | 3337.01            | 5621.76            |
| A_68_P31934470 | chr19:6400140-6400185                             | NM_011242:-420      | Rasgrp2    | PROMOTER               | 0.545                                                        | 0.202                          | 2184.44            | 440.73             | 0.11                           | 1554.57            | 170.97             |
| A_68_P31934551 | chr19:6413350-6413399                             | NM_011242:12792     | Rasgrp2    | INSIDE                 | 0.537                                                        | 4.700                          | 632.96             | 2974.75            | 2.523                          | 461.82             | 1165.35            |
| A_68_P25094128 | chr7:52883995-52884039                            | NM_028544:1110      | Rasip1     | INSIDE                 | 0.08                                                         | 4.932                          | 2009.90            | 9912.39            | 0.397                          | 1614.54            | 640.34             |
| A_68_P27561123 | chr11:4958083-4958127                             | NM_145216:-26       | Ras10a     | PROMOTER               | 0.436                                                        | 4.940                          | 1637.72            | 8090.22            | 2.155                          | 1442.08            | 3107.13            |

| ProbeName      | Target position of probe on CpG island microarray | TargetID            | GeneSymbol | CpG island Description | Ratio of relative methylation (TiO <sub>2</sub> -NP/Vehicle) | Sham group                     |                    |                    | TiO <sub>2</sub> -H group      |                    |                    |
|----------------|---------------------------------------------------|---------------------|------------|------------------------|--------------------------------------------------------------|--------------------------------|--------------------|--------------------|--------------------------------|--------------------|--------------------|
|                |                                                   |                     |            |                        |                                                              | Relative methylation (Cy5/Cy3) | Cy3 signal (Input) | Cy5 signal (MeDIP) | Relative methylation (Cy5/Cy3) | Cy3 signal (Input) | Cy5 signal (MeDIP) |
| A_68_P27561122 | chr11:4958001-4958045                             | NM_145216:-108      | Rasl10a    | PROMOTER               | 0.626                                                        | 3.419                          | 1202.96            | 4113.24            | 2.141                          | 1130.47            | 2420.44            |
| A_68_P23801768 | chr5:74591245-74591289                            | NM_026878:-84       | Rasl11b    | PROMOTER               | 0.323                                                        | 13.986                         | 3561.47            | 49812.52           | 4.523                          | 3145.02            | 14223.97           |
| A_68_P23801769 | chr5:74591333-74591377                            | NM_026878:4         | Rasl11b    | INSIDE                 | 0.457                                                        | 0.262                          | 1823.17            | 478.53             | 0.12                           | 1426.79            | 171.25             |
| A_68_P26809495 | chr9:107453757-107453801                          | NM_019713:-3208     | Rassf1     | PROMOTER               | 0.634                                                        | 0.387                          | 7365.54            | 2852.24            | 0.245                          | 5014.26            | 1230.30            |
| A_68_P25427821 | chr7:120097865-120097909                          | NM_175279:411       | Rassf10    | INSIDE                 | 0.641                                                        | 2.533                          | 1643.42            | 4162.07            | 1.624                          | 1471.94            | 2389.76            |
| A_68_P25427818 | chr7:120097419-120097463                          | NM_175279:-35       | Rassf10    | PROMOTER               | 0.517                                                        | 2.752                          | 1926.09            | 5301.57            | 1.423                          | 1513.77            | 2153.60            |
| A_68_P27503761 | chr10:120913745-120913792                         | NM_138956:-462      | Rassf3     | PROMOTER               | 0.252                                                        | 15.160                         | 349.18             | 5293.47            | 3.824                          | 285.74             | 1092.76            |
| A_68_P20614486 | chr1:133141955-133141999                          | NM_018750:-221      | Rassf5     | PROMOTER               | 0.413                                                        | 5.669                          | 1391.30            | 7887.67            | 2.34                           | 1184.46            | 2771.07            |
| A_68_P20614485 | chr1:133141876-133141920                          | NM_018750:-143      | Rassf5     | PROMOTER               | 0.414                                                        | 0.706                          | 1286.75            | 908.54             | 0.292                          | 1068.44            | 312.12             |
| A_68_P23152967 | chr4:100741468-100741512                          | NM_183024:-152      | Raver2     | PROMOTER               | 0.284                                                        | 0.566                          | 1615.03            | 914.69             | 0.161                          | 1380.87            | 221.74             |
| A_68_P23152974 | chr4:100742276-100742320                          | NM_183024:656       | Raver2     | INSIDE                 | 0.512                                                        | 0.431                          | 2459.71            | 1059.50            | 0.221                          | 2052.86            | 453.06             |
| A_68_P23152972 | chr4:100742061-100742105                          | NM_183024:440       | Raver2     | INSIDE                 | 0.605                                                        | 0.294                          | 3743.03            | 1100.46            | 0.178                          | 2510.29            | 446.19             |
| A_68_P23152973 | chr4:100742175-100742219                          | NM_183024:554       | Raver2     | INSIDE                 | 0.307                                                        | 0.680                          | 3209.04            | 2182.71            | 0.208                          | 2040.94            | 425.50             |
| A_68_P23152968 | chr4:100741662-100741706                          | NM_183024:42        | Raver2     | INSIDE                 | 0.546                                                        | 3.284                          | 543.85             | 1785.95            | 1.792                          | 529.47             | 948.96             |
| A_68_P31784091 | chr18:66094837-66094881                           | NM_013833:3885      | Rax        | INSIDE                 | 0.379                                                        | 18.432                         | 3460.71            | 63787.54           | 6.986                          | 3359.06            | 23466.09           |
| A_68_P31784121 | chr18:66098398-66098442                           | NM_013833:323       | Rax        | INSIDE                 | 0.492                                                        | 3.312                          | 826.47             | 2737.52            | 1.629                          | 765.02             | 1246.28            |
| A_68_P29716897 | chr14:73725909-73725953                           | NM_009029:-332      | Rb1        | PROMOTER               | 0.473                                                        | 3.135                          | 1686.90            | 5289.23            | 1.484                          | 1535.71            | 2278.61            |
| A_68_P24155330 | chr5:143942270-143942314                          | NM_001045482:130    | Rbak       | INSIDE                 | 0.568                                                        | 4.719                          | 829.17             | 3913.10            | 2.681                          | 684.50             | 1835.31            |
| A_68_P23296219 | chr4:129012748-129012792                          | NM_009030:-156      | Rbbp4      | DIVERGENT_PROMOTER     | 0.143                                                        | 22.530                         | 3808.66            | 85810.59           | 3.219                          | 3408.34            | 10970.36           |
| A_68_P23296217 | chr4:129012516-129012560                          | NM_009030:76        | Rbbp4      | INSIDE                 | 0.271                                                        | 8.387                          | 1470.12            | 12330.21           | 2.272                          | 1283.67            | 2916.85            |
| A_68_P23296214 | chr4:129012152-129012196                          | NM_009030:440       | Rbbp4      | INSIDE                 | 0.269                                                        | 0.603                          | 1270.88            | 765.76             | 0.162                          | 1129.83            | 183.29             |
| A_68_P23296216 | chr4:129012377-129012421                          | NM_009030:216       | Rbbp4      | INSIDE                 | 0.62                                                         | 2.391                          | 1301.35            | 3111.39            | 1.482                          | 1132.09            | 1678.06            |
| A_68_P25481826 | chr7:130114107-130114151                          | NM_175023:51        | Rbbp6      | INSIDE                 | 0.438                                                        | 0.427                          | 1658.25            | 708.24             | 0.187                          | 1293.41            | 241.79             |
| A_68_P25481817 | chr7:130113128-130113172                          | NM_175023:-927      | Rbbp6      | PROMOTER               | 0.658                                                        | 0.491                          | 2354.63            | 1157.06            | 0.323                          | 1895.45            | 613.11             |
| A_68_P31496424 | chr18:11815840-11815884                           | NM_001081223:-488   | Rbbp8      | PROMOTER               | 0.221                                                        | 18.025                         | 955.70             | 17226.32           | 3.984                          | 1063.59            | 4237.07            |
| A_68_P31862861 | chr18:80389593-80389637                           | NM_199197:7744      | Rbfa       | INSIDE                 | 0.639                                                        | 4.141                          | 703.34             | 2912.61            | 2.644                          | 543.45             | 1437.11            |
| A_68_P30520835 | chr16:6349110-63491154                            | NM_021477:464247    | Rbfox1     | INSIDE                 | 0.347                                                        | 0.386                          | 2027.80            | 782.39             | 0.134                          | 1541.04            | 206.52             |
| A_68_P30520836 | chr16:6349205-6349249                             | NM_021477:464341    | Rbfox1     | INSIDE                 | 0.617                                                        | 0.314                          | 2729.62            | 856.06             | 0.194                          | 2051.37            | 397.23             |
| A_68_P30353506 | chr15:77137384-77137428                           | NM_001110827:77     | Rbfox2     | INSIDE                 | 0.386                                                        | 0.687                          | 1113.01            | 765.05             | 0.265                          | 949.51             | 251.81             |
| A_68_P28172265 | chr11:118430608-118430652                         | NM_001024931:340256 | Rbfox3     | INSIDE                 | 0.284                                                        | 0.544                          | 1618.19            | 880.81             | 0.155                          | 1094.22            | 169.39             |
| A_68_P28174620 | chr11:118768747-118768791                         | NM_001024931:2118   | Rbfox3     | INSIDE                 | 0.395                                                        | 11.268                         | 5303.70            | 59759.60           | 4.45                           | 5242.25            | 23326.89           |
| A_68_P23579557 | chr5:32000096-32000140                            | NM_153196:-135      | Rbks       | DIVERGENT_PROMOTER     | 0.476                                                        | 0.438                          | 1131.18            | 495.20             | 0.209                          | 845.18             | 176.26             |
| A_68_P21775763 | chr2:157030686-157030730                          | NM_011249:-438      | Rb1l       | PROMOTER               | 0.162                                                        | 30.092                         | 942.89             | 28373.19           | 4.885                          | 686.38             | 3352.91            |
| A_68_P31925249 | chr19:4811087-4811131                             | NM_019869:526       | Rbm14      | INSIDE                 | 0.435                                                        | 4.568                          | 2690.55            | 12289.88           | 1.986                          | 2219.67            | 4407.99            |
| A_68_P22405709 | chr3:107135696-107135740                          | NM_001045807:489    | Rbm15      | INSIDE                 | 0.355                                                        | 9.538                          | 4039.79            | 38532.99           | 3.385                          | 3465.41            | 11731.39           |
| A_68_P22405721 | chr3:107137047-107137091                          | NM_001045807:-861   | Rbm15      | PROMOTER               | 0.663                                                        | 3.033                          | 838.24             | 2542.70            | 2.012                          | 760.82             | 1530.88            |
| A_68_P26805694 | chr9:106789235-106789279                          | NM_175402:75        | Rbm15b     | INSIDE                 | 0.51                                                         | 5.776                          | 406.01             | 2345.06            | 2.946                          | 350.91             | 1033.65            |
| A_68_P26805680 | chr9:106787523-106787567                          | NM_175402:1787      | Rbm15b     | INSIDE                 | 0.369                                                        | 1.408                          | 1778.68            | 2504.86            | 0.52                           | 1245.10            | 647.39             |
| A_68_P21138067 | chr2:35992191-35992235                            | NM_001159635:12     | Rbm18      | INSIDE                 | 0.62                                                         | 0.585                          | 1624.14            | 950.81             | 0.363                          | 1272.33            | 462.00             |
| A_68_P32183823 | chr19:53751563-53751607                           | NM_001170847:-211   | Rbm20      | PROMOTER               | 0.429                                                        | 0.331                          | 1569.35            | 520.05             | 0.142                          | 1265.54            | 179.91             |
| A_68_P32183825 | chr19:53751761-53751805                           | NM_001170847:-13    | Rbm20      | PROMOTER               | 0.485                                                        | 4.317                          | 1595.18            | 6886.09            | 2.093                          | 1217.52            | 2548.10            |
| A_68_P29875607 | chr14:105575770-105575816                         | NM_134077:752       | Rbm26      | INSIDE                 | 0.45                                                         | 0.553                          | 1975.20            | 1091.96            | 0.249                          | 1420.45            | 353.40             |
| A_68_P31654583 | chr18:42435328-42435372                           | NM_172626:344       | Rbm27      | INSIDE                 | 0.455                                                        | 6.151                          | 3320.18            | 20423.61           | 2.798                          | 2766.67            | 7742.30            |
| A_68_P23562013 | chr5:28643983-28644027                            | NM_028234:276       | Rbm33      | INSIDE                 | 0.462                                                        | 5.386                          | 870.84             | 4690.49            | 2.489                          | 982.58             | 2445.53            |
| A_68_P21769931 | chr2:156005366-156005410                          | NM_133242:588       | Rbm39      | INSIDE                 | 0.232                                                        | 13.974                         | 1406.13            | 19649.39           | 3.243                          | 1342.49            | 4353.31            |
| A_68_P31925086 | chr19:4787882-4787926                             | NM_009032:5973      | Rbm4       | INSIDE                 | 0.483                                                        | 4.644                          | 2152.43            | 9995.03            | 2.243                          | 1546.42            | 3468.47            |

| ProbeName      | Target position of probe on CpG island microarray | TargetID           | GeneSymbol | CpG island Description | Ratio of relative methylation (TiO <sub>2</sub> -NP/Vehicle) | Sham group                     |                    |                    | TiO <sub>2</sub> -H group      |                    |                    |
|----------------|---------------------------------------------------|--------------------|------------|------------------------|--------------------------------------------------------------|--------------------------------|--------------------|--------------------|--------------------------------|--------------------|--------------------|
|                |                                                   |                    |            |                        |                                                              | Relative methylation (Cy5/Cy3) | Cy3 signal (Input) | Cy5 signal (MeDIP) | Relative methylation (Cy5/Cy3) | Cy3 signal (Input) | Cy5 signal (MeDIP) |
| A_68_P21349791 | chr2:76208360-76208404                            | NM_153405:342      | Rbm45      | INSIDE                 | 0.619                                                        | 0.589                          | 1176.42            | 692.52             | 0.365                          | 858.91             | 313.18             |
| A_68_P31924879 | chr19:4756746-4756790                             | NM_025717:244      | Rbm4b      | INSIDE                 | 0.127                                                        | 1.624                          | 1127.37            | 1830.72            | 0.206                          | 887.37             | 182.99             |
| A_68_P26811550 | chr9:107775126-107775170                          | NM_011251:2        | Rbm6       | INSIDE                 | 0.609                                                        | 5.723                          | 787.38             | 4506.14            | 3.488                          | 698.71             | 2437.00            |
| A_68_P26492138 | chr9:48303203-48303247                            | NM_144948:211      | Rbm7       | INSIDE                 | 0.227                                                        | 8.038                          | 1539.52            | 12373.93           | 1.827                          | 1521.44            | 2780.24            |
| A_68_P21261139 | chr2:60719156-60719200                            | NM_001141931:317   | Rbms1      | INSIDE                 | 0.313                                                        | 8.137                          | 616.13             | 5013.28            | 2.545                          | 531.68             | 1353.06            |
| A_68_P21261715 | chr2:60800332-60800376                            | NM_020296:907      | Rbms1      | INSIDE                 | 0.386                                                        | 0.483                          | 1444.11            | 697.22             | 0.187                          | 1141.07            | 212.85             |
| A_68_P21261718 | chr2:60800604-60800648                            | NM_020296:635      | Rbms1      | INSIDE                 | 0.562                                                        | 2.729                          | 1025.82            | 2799.94            | 1.533                          | 974.51             | 1493.57            |
| A_68_P32365934 | chrX:46048429-46048473                            | NM_173376:270      | Rbmx2      | INSIDE                 | 0.272                                                        | 58.723                         | 2282.45            | 134032.80          | 15.969                         | 2472.44            | 39481.60           |
| A_68_P32365932 | chrX:46048174-46048218                            | NM_173376:16       | Rbmx2      | INSIDE                 | 0.563                                                        | 2.922                          | 520.22             | 1520.30            | 1.646                          | 824.75             | 1357.53            |
| A_68_P32099689 | chr19:38199320-38199364                           | NM_011255:-41      | Rbp4       | PROMOTER               | 0.37                                                         | 6.530                          | 790.03             | 5158.60            | 2.419                          | 642.59             | 1554.39            |
| A_68_P23701554 | chr5:53982361-53982405                            | NM_001080927:570   | Rbpj       | INSIDE                 | 0.525                                                        | 3.358                          | 2406.61            | 8081.91            | 1.764                          | 2260.44            | 3987.11            |
| A_68_P23701542 | chr5:53980937-53980981                            | NM_009035:-495     | Rbpj       | PROMOTER               | 0.451                                                        | 3.791                          | 779.18             | 2953.58            | 1.71                           | 634.53             | 1084.92            |
| A_68_P21817620 | chr2:164226294-164226338                          | NM_009036:-2377    | Rbpjl      | PROMOTER               | 0.639                                                        | 2.983                          | 437.30             | 1304.63            | 1.907                          | 433.73             | 827.02             |
| A_68_P26588687 | chr9:65478956-65479000                            | NM_028030:590      | Rbpms2     | INSIDE                 | 0.394                                                        | 14.086                         | 1241.41            | 17486.32           | 5.549                          | 1104.64            | 6129.26            |
| A_68_P30378087 | chr15:81296943-81296987                           | NM_019712:219      | Rbx1       | INSIDE                 | 0.38                                                         | 1.537                          | 3248.11            | 4991.92            | 0.584                          | 2458.50            | 1436.29            |
| A_68_P20768946 | chr1:162837198-162837242                          | NM_001024952:679   | Rc3h1      | INSIDE                 | 0.57                                                         | 5.293                          | 807.61             | 4274.62            | 3.019                          | 628.08             | 1895.92            |
| A_68_P29637346 | chr14:59820048-59820093                           | NM_027764:6        | Rcctb1     | INSIDE                 | 0.371                                                        | 5.294                          | 450.43             | 2384.55            | 1.963                          | 404.25             | 793.56             |
| A_68_P29715887 | chr14:73543290-73543334                           | NR_033185:721      | Rcctb2     | INSIDE                 | 0.403                                                        | 4.467                          | 797.72             | 3563.17            | 1.802                          | 641.35             | 1155.75            |
| A_68_P23311885 | chr4:131901472-131901516                          | NM_001197082:171   | Rce1       | INSIDE                 | 0.538                                                        | 3.120                          | 1477.74            | 4610.08            | 1.679                          | 1280.28            | 2150.02            |
| A_68_P31924141 | chr19:4625447-4625491                             | NM_023131:149      | Rce1       | INSIDE                 | 0.31                                                         | 0.443                          | 1835.20            | 812.13             | 0.137                          | 1447.38            | 198.86             |
| A_68_P21494381 | chr2:105239586-105239630                          | NM_009037:-132     | Rcn1       | PROMOTER               | 0.377                                                        | 6.643                          | 1141.03            | 7579.42            | 2.506                          | 1034.65            | 2592.47            |
| A_68_P28741731 | chr12:112278009-112278053                         | NM_198023:22       | Rcor1      | INSIDE                 | 0.442                                                        | 7.156                          | 8362.73            | 59843.73           | 3.164                          | 7907.72            | 25016.53           |
| A_68_P28741728 | chr12:112276886-112276930                         | NM_198023:-1100    | Rcor1      | PROMOTER               | 0.602                                                        | 0.611                          | 1583.69            | 966.89             | 0.367                          | 1221.13            | 448.76             |
| A_68_P20941842 | chr1:193961625-193961669                          | NM_144814:23       | Rcor3      | INSIDE                 | 0.186                                                        | 1.562                          | 1010.97            | 1579.40            | 0.29                           | 954.51             | 277.11             |
| A_68_P20053922 | chr1:16095556-16095600                            | NM_133832:-384     | Rdh10      | DIVERGENT_PROMOTER     | 0.576                                                        | 0.430                          | 1945.20            | 835.94             | 0.248                          | 2108.90            | 522.25             |
| A_68_P20053921 | chr1:16095417-16095461                            | NM_133832:-524     | Rdh10      | DIVERGENT_PROMOTER     | 0.6                                                          | 0.453                          | 3873.83            | 1753.78            | 0.272                          | 3167.22            | 860.05             |
| A_68_P22874082 | chr4:43888324-43888368                            | NM_016678:-55      | Reck       | PROMOTER               | 0.276                                                        | 16.830                         | 1356.28            | 22825.94           | 4.638                          | 1107.84            | 5137.88            |
| A_68_P30350128 | chr15:76540931-76540975                           | NM_058214:37       | Recq4      | INSIDE                 | 0.407                                                        | 13.384                         | 3297.82            | 44138.29           | 5.452                          | 2532.14            | 13805.33           |
| A_68_P24537771 | chr6:71657856-71657900                            | NM_178608:204      | Reep1      | INSIDE                 | 0.392                                                        | 8.539                          | 1855.64            | 15844.95           | 3.344                          | 1419.87            | 4747.51            |
| A_68_P24537769 | chr6:71657624-71657668                            | NM_178608:-28      | Reep1      | PROMOTER               | 0.608                                                        | 5.499                          | 698.19             | 3839.67            | 3.344                          | 604.85             | 2022.87            |
| A_68_P29701956 | chr14:70944977-70945021                           | NM_180588:-59      | Reep4      | PROMOTER               | 0.281                                                        | 5.653                          | 985.96             | 5573.77            | 1.587                          | 1005.53            | 1595.95            |
| A_68_P31612548 | chr18:34533141-34533185                           | NM_007874:-93      | Reep5      | PROMOTER               | 0.522                                                        | 7.573                          | 2010.58            | 15226.28           | 3.957                          | 1697.32            | 6715.74            |
| A_68_P27647504 | chr11:23671033-23671077                           | NM_009044:-84      | Rel        | PROMOTER               | 0.187                                                        | 15.560                         | 2250.42            | 35016.13           | 2.906                          | 1816.34            | 5277.87            |
| A_68_P27647502 | chr11:23670649-23670693                           | NM_009044:300      | Rel        | INSIDE                 | 0.494                                                        | 0.559                          | 2490.00            | 1392.09            | 0.276                          | 1976.79            | 545.75             |
| A_68_P24994377 | chr7:20204860-20204904                            | NM_009046:9905     | Relb       | INSIDE                 | 0.513                                                        | 4.493                          | 2576.35            | 11575.14           | 2.306                          | 1972.30            | 4547.36            |
| A_68_P31631093 | chr18:38115542-38115586                           | NM_153793:352      | Rel2       | INSIDE                 | 0.416                                                        | 0.659                          | 960.81             | 633.22             | 0.274                          | 713.91             | 195.84             |
| A_68_P23531274 | chr5:21850512-21850556                            | NM_011261:-11      | Reln       | PROMOTER               | 0.178                                                        | 22.193                         | 3405.06            | 75569.33           | 3.943                          | 3361.31            | 13252.76           |
| A_68_P29612657 | chr14:55098262-55098306                           | NM_080726:3348     | Rem2       | INSIDE                 | 0.665                                                        | 0.659                          | 784.60             | 517.41             | 0.439                          | 717.69             | 314.74             |
| A_68_P24428193 | chr6:48544163-48544207                            | NM_001079901:303   | Repin1     | INSIDE                 | 0.34                                                         | 7.737                          | 1168.19            | 9038.70            | 2.627                          | 998.88             | 2624.41            |
| A_68_P32790431 | chrX:159081429-159081473                          | NM_178256:83       | Reps2      | INSIDE                 | 0.611                                                        | 3.250                          | 761.28             | 2474.53            | 1.986                          | 1211.18            | 2404.97            |
| A_68_P23405735 | chr4:149745973-149746017                          | NM_001085492:89970 | Rere       | INSIDE                 | 0.447                                                        | 0.461                          | 1060.76            | 488.76             | 0.206                          | 823.68             | 169.75             |
| A_68_P23405733 | chr4:149745839-149745883                          | NM_001085492:89836 | Rere       | INSIDE                 | 0.479                                                        | 4.040                          | 4955.23            | 20019.55           | 1.934                          | 3612.39            | 6988.12            |
| A_68_P23405236 | chr4:149655404-149655448                          | NM_001085492:-598  | Rere       | PROMOTER               | 0.538                                                        | 3.865                          | 616.95             | 2384.53            | 2.078                          | 530.46             | 1102.46            |
| A_68_P23820630 | chr5:77694944-77694988                            | NM_011263:448      | Rest       | INSIDE                 | 0.388                                                        | 4.363                          | 5805.59            | 25327.01           | 1.692                          | 5013.89            | 8483.06            |
| A_68_P23820628 | chr5:77694649-77694693                            | NM_011263:152      | Rest       | INSIDE                 | 0.416                                                        | 0.414                          | 2214.91            | 917.38             | 0.172                          | 1783.11            | 306.87             |
| A_68_P20157818 | chr1:38186099-38186143                            | NM_019570:387      | Rev1       | INSIDE                 | 0.363                                                        | 9.920                          | 438.13             | 4346.33            | 3.601                          | 367.82             | 1324.45            |

| ProbeName      | Target position of probe on CpG island microarray | TargetID          | GeneSymbol | CpG island Description | Ratio of relative methylation (TiO <sub>2</sub> -NP/Vehicle) | Sham group                     |                    |                    | TiO <sub>2</sub> -H group      |                    |                    |
|----------------|---------------------------------------------------|-------------------|------------|------------------------|--------------------------------------------------------------|--------------------------------|--------------------|--------------------|--------------------------------|--------------------|--------------------|
|                |                                                   |                   |            |                        |                                                              | Relative methylation (Cy5/Cy3) | Cy3 signal (Input) | Cy5 signal (MeDIP) | Relative methylation (Cy5/Cy3) | Cy3 signal (Input) | Cy5 signal (MeDIP) |
| A_68_P20157823 | chr1:38186758-38186802                            | NM_019570:-273    | Rev1       | PROMOTER               | 0.412                                                        | 4.911                          | 1462.82            | 7184.29            | 2.025                          | 1187.76            | 2404.86            |
| A_68_P27080342 | chr10:39452039-39452083                           | NM_011264:95      | Rev31      | INSIDE                 | 0.595                                                        | 3.261                          | 1153.02            | 3760.53            | 1.942                          | 938.62             | 1822.54            |
| A_68_P27283985 | chr10:80024218-80024262                           | NM_025852:65      | Rexo1      | INSIDE                 | 0.26                                                         | 6.078                          | 1681.51            | 10220.73           | 1.58                           | 1423.57            | 2248.61            |
| A_68_P24020335 | chr5:117838986-117839030                          | NM_028128:24      | Rfc5       | INSIDE                 | 0.398                                                        | 8.682                          | 1274.30            | 11064.05           | 3.457                          | 1077.10            | 3723.51            |
| A_68_P27968802 | chr11:82684465-82684509                           | NM_001164570:-240 | Rff1       | PROMOTER               | 0.306                                                        | 12.092                         | 75451.67           | 912370.80          | 3.705                          | 75627.29           | 280208.80          |
| A_68_P31227302 | chr17:50329542-50329586                           | NM_181397:258     | Rffn1      | INSIDE                 | 0.557                                                        | 6.496                          | 1837.38            | 11936.49           | 3.619                          | 1503.42            | 5440.21            |
| A_68_P31227303 | chr17:50329691-50329735                           | NM_181397:110     | Rffn1      | INSIDE                 | 0.542                                                        | 2.899                          | 1315.82            | 3814.09            | 1.57                           | 1172.43            | 1840.84            |
| A_68_P20759145 | chr1:161162430-161162474                          | NM_011931:-4      | Rfwd2      | PROMOTER               | 0.454                                                        | 6.997                          | 1750.85            | 12250.56           | 3.177                          | 1472.92            | 4679.26            |
| A_68_P20759140 | chr1:161161812-161161856                          | NM_011931:-622    | Rfwd2      | PROMOTER               | 0.247                                                        | 7.504                          | 948.32             | 7116.27            | 1.856                          | 901.20             | 1672.79            |
| A_68_P26017904 | chr8:86591013-86591057                            | NM_009055:300     | Rfx1       | INSIDE                 | 0.244                                                        | 20.887                         | 1693.86            | 35379.67           | 5.089                          | 1497.29            | 7618.96            |
| A_68_P26017907 | chr8:86591308-86591352                            | NM_009055:596     | Rfx1       | INSIDE                 | 0.369                                                        | 0.542                          | 1500.36            | 812.79             | 0.2                            | 1146.94            | 228.98             |
| A_68_P31258630 | chr17:56969214-56969258                           | NM_009056:1195    | Rfx2       | INSIDE                 | 0.088                                                        | 48.008                         | 3818.31            | 183311.00          | 4.245                          | 4371.30            | 18556.10           |
| A_68_P22341452 | chr3:94758251-94758295                            | NM_017395:-664    | Rfx5       | PROMOTER               | 0.506                                                        | 4.120                          | 1429.59            | 5889.30            | 2.086                          | 1155.06            | 2409.21            |
| A_68_P26628308 | chr9:72380438-72380482                            | NM_001033536:414  | Rfx7       | INSIDE                 | 0.666                                                        | 0.662                          | 880.09             | 582.69             | 0.441                          | 706.63             | 311.64             |
| A_68_P22149943 | chr3:54611747-54611791                            | NM_133231:-55     | Rfxap      | PROMOTER               | 0.326                                                        | 13.547                         | 1254.37            | 16992.80           | 4.416                          | 1042.53            | 4603.62            |
| A_68_P30778982 | chr16:56037716-56037760                           | NM_029092:149     | Rg9md1     | INSIDE                 | 0.46                                                         | 4.831                          | 1668.53            | 8060.93            | 2.223                          | 1516.55            | 3370.90            |
| A_68_P22567229 | chr3:137806950-137806994                          | NM_175389:471     | Rg9md2     | INSIDE                 | 0.539                                                        | 3.552                          | 514.26             | 1826.44            | 1.915                          | 425.21             | 814.23             |
| A_68_P31151025 | chr17:34067414-34067462                           | NM_009059:600     | Rgl2       | INSIDE                 | 0.03                                                         | 3.337                          | 2866.57            | 9566.15            | 0.099                          | 1768.58            | 174.51             |
| A_68_P31151050 | chr17:34067192-34067236                           | NM_009059:376     | Rgl2       | INSIDE                 | 0.214                                                        | 7.444                          | 4761.17            | 35442.67           | 1.595                          | 3832.98            | 6112.83            |
| A_68_P25228678 | chr7:80521046-80521090                            | NM_177740:663     | Rgma       | INSIDE                 | 0.62                                                         | 3.324                          | 920.53             | 3060.04            | 2.061                          | 860.57             | 1773.29            |
| A_68_P25228675 | chr7:80520597-80520641                            | NM_177740:213     | Rgma       | INSIDE                 | 0.156                                                        | 14.423                         | 580.97             | 8379.37            | 2.255                          | 559.63             | 1261.73            |
| A_68_P25228921 | chr7:80554435-80554479                            | NM_177740:34051   | Rgma       | INSIDE                 | 0.214                                                        | 6.992                          | 3369.48            | 23560.11           | 1.496                          | 2541.73            | 3802.47            |
| A_68_P31067776 | chr17:15968184-15968228                           | NM_178615:-4656   | Rgmb       | PROMOTER               | 0.366                                                        | 5.977                          | 1656.09            | 9898.39            | 2.185                          | 1394.25            | 3046.20            |
| A_68_P31067738 | chr17:15963543-15963587                           | NM_178615:-14     | Rgmb       | PROMOTER               | 0.455                                                        | 3.833                          | 8115.38            | 31108.04           | 1.746                          | 6611.76            | 11542.98           |
| A_68_P29256277 | chr13:98976271-98976315                           | NM_012026:-172    | Rgnef      | PROMOTER               | 0.529                                                        | 5.664                          | 1608.02            | 9107.79            | 2.994                          | 1459.00            | 4368.49            |
| A_68_P31108919 | chr17:26340559-26340603                           | NM_001081069:674  | Rgs11      | INSIDE                 | 0.579                                                        | 0.682                          | 1229.14            | 838.60             | 0.395                          | 1009.76            | 398.59             |
| A_68_P23597150 | chr5:35292277-35292321                            | NM_173402:202     | Rgs12      | INSIDE                 | 0.561                                                        | 17.300                         | 339.73             | 5877.26            | 9.702                          | 301.42             | 2924.35            |
| A_68_P26904675 | chr10:4424482-4424526                             | NM_001161822:364  | Rgs17      | INSIDE                 | 0.347                                                        | 5.226                          | 1843.19            | 9632.28            | 1.811                          | 1705.28            | 3088.76            |
| A_68_P28587838 | chr12:83718593-83718637                           | NM_015812:590     | Rgs6       | INSIDE                 | 0.385                                                        | 0.471                          | 1653.72            | 778.87             | 0.181                          | 1373.35            | 249.00             |
| A_68_P20848445 | chr1:177422484-177422528                          | NM_001199003:170  | Rgs7       | INSIDE                 | 0.359                                                        | 9.124                          | 2262.55            | 20642.37           | 3.272                          | 2456.38            | 8037.73            |
| A_68_P29294054 | chr13:105844417-105844461                         | NM_029879:572     | Rgs7bp     | INSIDE                 | 0.608                                                        | 8.637                          | 1089.17            | 9407.65            | 5.253                          | 921.49             | 4840.20            |
| A_68_P25050058 | chr7:36370084-36370128                            | NM_145840:495     | Rgs9bp     | INSIDE                 | 0.355                                                        | 6.935                          | 789.46             | 5474.66            | 2.462                          | 639.71             | 1574.67            |
| A_68_P25050056 | chr7:36369864-36369908                            | NM_145840:715     | Rgs9bp     | INSIDE                 | 0.364                                                        | 9.461                          | 1220.26            | 11545.36           | 3.442                          | 1057.30            | 3638.79            |
| A_68_P25050063 | chr7:36370599-36370643                            | NM_145840:-19     | Rgs9bp     | DIVERGENT_PROMOTER     | 0.511                                                        | 4.326                          | 2625.31            | 11355.89           | 2.211                          | 2421.43            | 5354.76            |
| A_68_P27561411 | chr11:4999553-4999597                             | NM_177370:134     | Rhbd3      | INSIDE                 | 0.421                                                        | 5.840                          | 862.66             | 5038.17            | 2.458                          | 789.13             | 1939.80            |
| A_68_P27687498 | chr11:32121990-32122034                           | NM_010117:281     | Rhbdfl     | INSIDE                 | 0.572                                                        | 3.911                          | 1338.09            | 5233.86            | 2.236                          | 1135.25            | 2538.57            |
| A_68_P27687433 | chr11:32113469-32113513                           | NM_010117:8803    | Rhbdfl     | INSIDE                 | 0.634                                                        | 2.817                          | 709.74             | 1999.27            | 1.786                          | 762.11             | 1361.14            |
| A_68_P28160475 | chr11:116485728-116485781                         | NM_001167680:-188 | Rhbdf2     | PROMOTER               | 0.349                                                        | 0.438                          | 1602.52            | 702.62             | 0.153                          | 1144.91            | 175.02             |
| A_68_P28160474 | chr11:116485631-116485675                         | NM_001167680:-86  | Rhbdf2     | PROMOTER               | 0.619                                                        | 4.052                          | 5239.83            | 21233.13           | 2.508                          | 4416.02            | 11076.95           |
| A_68_P27953576 | chr11:80114526-80114570                           | NM_139228:135     | Rhbdl3     | INSIDE                 | 0.233                                                        | 19.290                         | 2033.34            | 39222.77           | 4.491                          | 2272.18            | 10205.44           |
| A_68_P27953582 | chr11:80115193-80115237                           | NM_139228:801     | Rhbdl3     | INSIDE                 | 0.593                                                        | 0.607                          | 995.19             | 604.06             | 0.36                           | 801.18             | 288.40             |
| A_68_P23544150 | chr5:24348013-24348057                            | NM_053075:145     | Rheb       | INSIDE                 | 0.415                                                        | 0.201                          | 2859.82            | 575.06             | 0.083                          | 2079.43            | 173.32             |
| A_68_P23544155 | chr5:24348677-24348721                            | NM_053075:-519    | Rheb       | PROMOTER               | 0.435                                                        | 4.526                          | 3081.97            | 13950.00           | 1.969                          | 2398.77            | 4722.44            |
| A_68_P23544153 | chr5:24348440-24348484                            | NM_053075:-283    | Rheb       | PROMOTER               | 0.506                                                        | 0.444                          | 3223.86            | 1430.26            | 0.224                          | 2355.18            | 528.44             |
| A_68_P23544149 | chr5:24347845-24347889                            | NM_053075:313     | Rheb       | INSIDE                 | 0.67                                                         | 3.850                          | 1334.59            | 5138.40            | 2.58                           | 1128.52            | 2911.69            |
| A_68_P30477110 | chr15:98711473-98711517                           | NM_026967:351     | Rheb1l     | INSIDE                 | 0.482                                                        | 0.254                          | 3894.13            | 990.18             | 0.123                          | 2605.10            | 319.53             |

| ProbeName      | Target position of probe on CpG island microarray | TargetID            | GeneSymbol | CpG island Description | Ratio of relative methylation (TiO <sub>2</sub> -NP/Vehicle) | Sham group                     |                    |                    | TiO <sub>2</sub> -H group      |                    |                    |
|----------------|---------------------------------------------------|---------------------|------------|------------------------|--------------------------------------------------------------|--------------------------------|--------------------|--------------------|--------------------------------|--------------------|--------------------|
|                |                                                   |                     |            |                        |                                                              | Relative methylation (Cy5/Cy3) | Cy3 signal (Input) | Cy5 signal (MeDIP) | Relative methylation (Cy5/Cy3) | Cy3 signal (Input) | Cy5 signal (MeDIP) |
| A_68_P26814202 | chr9:108209138-108209182                          | NM_016802:625       | Rhoa       | INSIDE                 | 0.307                                                        | 39.272                         | 4239.46            | 166490.60          | 12.056                         | 5206.00            | 62761.70           |
| A_68_P28222996 | chr12:8506600-8506644                             | NM_007483:169       | Rhob       | INSIDE                 | 0.184                                                        | 161.995                        | 2950.86            | 478024.90          | 29.755                         | 7203.39            | 214334.50          |
| A_68_P27222447 | chr10:68675289-68675333                           | NM_001081347:-94    | Rhobtb1    | PROMOTER               | 0.618                                                        | 3.573                          | 1151.97            | 4116.12            | 2.207                          | 1052.26            | 2322.50            |
| A_68_P27222783 | chr10:68732909-68732953                           | NM_001081347:57526  | Rhobtb1    | INSIDE                 | 0.614                                                        | 2.730                          | 1628.29            | 4445.35            | 1.676                          | 1245.43            | 2086.93            |
| A_68_P29697194 | chr14:70196895-70196939                           | NM_153514:8436      | Rhobtb2    | INSIDE                 | 0.242                                                        | 8.035                          | 2572.59            | 20670.41           | 1.945                          | 1852.08            | 3601.81            |
| A_68_P29152220 | chr13:76081481-76081525                           | NM_028493:-230      | Rhobtb3    | PROMOTER               | 0.418                                                        | 6.213                          | 987.90             | 6137.65            | 2.597                          | 957.65             | 2486.71            |
| A_68_P24054155 | chr5:123591978-123592024                          | NM_175092:-9362     | Rhof       | PROMOTER               | 0.223                                                        | 16.947                         | 489.04             | 8287.69            | 3.778                          | 419.41             | 1584.51            |
| A_68_P24054149 | chr5:123591328-123591372                          | NM_175092:-8712     | Rhof       | PROMOTER               | 0.497                                                        | 0.299                          | 1459.96            | 436.57             | 0.149                          | 1159.69            | 172.26             |
| A_68_P24054157 | chr5:123592214-123592258                          | NM_175092:-9598     | Rhof       | PROMOTER               | 0.564                                                        | 0.481                          | 2289.59            | 1101.85            | 0.271                          | 1817.54            | 493.30             |
| A_68_P24054154 | chr5:123591908-123591952                          | NM_175092:-9292     | Rhof       | PROMOTER               | 0.604                                                        | 0.729                          | 3569.95            | 2602.05            | 0.44                           | 2612.47            | 1149.36            |
| A_68_P25377912 | chr7:109398432-109398476                          | NM_019566:178       | Rhog       | INSIDE                 | 0.187                                                        | 10.105                         | 3032.42            | 30642.26           | 1.887                          | 2710.32            | 5113.83            |
| A_68_P25377910 | chr7:109398192-109398236                          | NM_019566:418       | Rhog       | INSIDE                 | 0.438                                                        | 0.469                          | 1876.50            | 880.94             | 0.206                          | 1553.19            | 319.22             |
| A_68_P31420286 | chr17:87362969-87363013                           | NM_145491:540       | Rhoq       | INSIDE                 | 0.347                                                        | 12.694                         | 3374.14            | 42831.20           | 4.401                          | 2746.89            | 12090.36           |
| A_68_P26240713 | chr8:126177658-126177702                          | NM_133955:-148      | Rhou       | PROMOTER               | 0.547                                                        | 3.956                          | 2751.98            | 10885.63           | 2.165                          | 2261.03            | 4894.38            |
| A_68_P21568741 | chr2:119096977-119097021                          | NM_145530:-36       | Rhov       | PROMOTER               | 0.384                                                        | 6.159                          | 1883.64            | 11601.46           | 2.367                          | 1855.11            | 4391.51            |
| A_68_P30343472 | chr15:75534891-75534935                           | NM_001163465:195    | Rhpn1      | INSIDE                 | 0.26                                                         | 6.014                          | 1306.09            | 7854.76            | 1.565                          | 1097.30            | 1717.45            |
| A_68_P25048762 | chr7:36119539-36119583                            | NM_027897:305       | Rhpn2      | INSIDE                 | 0.485                                                        | 0.620                          | 5555.01            | 3444.86            | 0.3                            | 4258.67            | 1279.73            |
| A_68_P25585270 | chr7:148043114-148043158                          | NM_053194:-159      | Ric8       | DIVERGENT_PROMOTER     | 0.242                                                        | 0.298                          | 3875.04            | 1155.70            | 0.072                          | 2426.49            | 175.07             |
| A_68_P25585272 | chr7:148043313-148043357                          | NM_053194:39        | Ric8       | INSIDE                 | 0.382                                                        | 3.809                          | 1269.69            | 4835.97            | 1.456                          | 1118.98            | 1628.75            |
| A_68_P27305481 | chr10:84380679-84380723                           | NM_001013441:300    | Ric8b      | INSIDE                 | 0.406                                                        | 0.568                          | 878.35             | 498.48             | 0.23                           | 748.39             | 172.29             |
| A_68_P29989754 | chr15:6659137-6659181                             | NM_030168:778       | Rictor     | INSIDE                 | 0.596                                                        | 0.680                          | 917.48             | 623.92             | 0.405                          | 665.95             | 269.70             |
| A_68_P21217118 | chr2:51928841-51928885                            | NM_175238:506       | Rif1       | INSIDE                 | 0.569                                                        | 0.595                          | 3917.29            | 2331.58            | 0.338                          | 3156.03            | 1068.21            |
| A_68_P27926518 | chr11:75324220-75324264                           | NM_001029938:647    | Rilp       | INSIDE                 | 0.108                                                        | 33.801                         | 3288.10            | 111141.00          | 3.637                          | 2893.24            | 10521.49           |
| A_68_P27926516 | chr11:75323969-75324013                           | NM_001029938:395    | Rilp       | INSIDE                 | 0.411                                                        | 10.816                         | 899.94             | 9733.36            | 4.444                          | 831.33             | 3694.52            |
| A_68_P27926514 | chr11:75323805-75323849                           | NM_001029938:231    | Rilp       | INSIDE                 | 0.572                                                        | 4.062                          | 748.97             | 3041.95            | 2.323                          | 671.63             | 1560.00            |
| A_68_P24061765 | chr5:124981116-124981160                          | NM_021430:262       | Rilp1      | INSIDE                 | 0.47                                                         | 0.497                          | 987.05             | 490.74             | 0.233                          | 785.34             | 183.35             |
| A_68_P24085128 | chr5:129287634-129287678                          | NM_001081388:171581 | Rimbp2     | INSIDE                 | 0.487                                                        | 4.459                          | 506.69             | 2259.21            | 2.173                          | 425.31             | 924.02             |
| A_68_P30572558 | chr16:17210568-17210612                           | NM_001033338:2363   | Rimbp3     | INSIDE                 | 0.654                                                        | 0.282                          | 2029.93            | 572.50             | 0.185                          | 1561.58            | 288.11             |
| A_68_P30572557 | chr16:17210481-17210525                           | NM_001033338:2275   | Rimbp3     | INSIDE                 | 0.373                                                        | 0.629                          | 816.11             | 513.02             | 0.234                          | 724.66             | 169.77             |
| A_68_P30572552 | chr16:17209857-17209901                           | NM_001033338:1651   | Rimbp3     | INSIDE                 | 0.361                                                        | 0.656                          | 897.37             | 589.10             | 0.237                          | 730.16             | 172.97             |
| A_68_P23245805 | chr4:119164931-119164975                          | NM_177572:251       | Rimkla     | INSIDE                 | 0.449                                                        | 4.635                          | 1019.97            | 4727.32            | 2.082                          | 770.77             | 1604.61            |
| A_68_P20085263 | chr1:22812453-22812497                            | NM_001012623:89     | Rims1      | INSIDE                 | 0.179                                                        | 1.870                          | 2696.03            | 5041.18            | 0.335                          | 1864.70            | 623.90             |
| A_68_P20085264 | chr1:22812557-22812601                            | NM_001012623:-15    | Rims1      | PROMOTER               | 0.259                                                        | 10.289                         | 4947.17            | 50900.68           | 2.667                          | 4380.63            | 11683.94           |
| A_68_P20083595 | chr1:22540893-22540937                            | NM_001012623:271649 | Rims1      | INSIDE                 | 0.304                                                        | 0.547                          | 1221.71            | 668.62             | 0.166                          | 1036.90            | 172.52             |
| A_68_P30152564 | chr15:39028639-39028683                           | NM_053271:-1217     | Rims2      | PROMOTER               | 0.481                                                        | 0.481                          | 1366.81            | 657.22             | 0.231                          | 951.29             | 220.15             |
| A_68_P30152571 | chr15:39029657-39029701                           | NM_053271:-199      | Rims2      | PROMOTER               | 0.559                                                        | 0.623                          | 2972.98            | 1851.96            | 0.348                          | 2218.02            | 771.94             |
| A_68_P28690583 | chr12:103521466-103521510                         | NM_001161365:-362   | Rin3       | PROMOTER               | 0.433                                                        | 4.644                          | 2162.32            | 10042.56           | 2.012                          | 1981.58            | 3986.38            |
| A_68_P31151553 | chr17:34161608-34161652                           | NM_009066:-5        | Ring1      | PROMOTER               | 0.647                                                        | 2.212                          | 3117.56            | 6896.96            | 1.431                          | 2534.09            | 3626.12            |
| A_68_P28958211 | chr13:38129415-38129459                           | NM_024242:579       | Riok1      | INSIDE                 | 0.615                                                        | 0.705                          | 1971.54            | 1390.59            | 0.434                          | 1582.57            | 686.78             |
| A_68_P31072977 | chr17:17511065-17511109                           | NM_025934:-209      | Riok2      | PROMOTER               | 0.579                                                        | 0.506                          | 1064.57            | 538.26             | 0.293                          | 925.84             | 271.12             |
| A_68_P28936016 | chr13:34094703-34094748                           | NM_009068:-17       | Ripk1      | DIVERGENT_PROMOTER     | 0.375                                                        | 15.960                         | 3543.80            | 56557.75           | 5.987                          | 2640.53            | 15809.99           |
| A_68_P22753435 | chr4:16090304-16090348                            | NM_138952:319       | Ripk2      | INSIDE                 | 0.544                                                        | 3.654                          | 1210.40            | 4422.58            | 1.988                          | 1107.11            | 2200.82            |
| A_68_P31000878 | chr16:97985324-97985368                           | NM_023663:16        | Ripk4      | INSIDE                 | 0.45                                                         | 0.404                          | 2684.93            | 1084.93            | 0.182                          | 2099.62            | 382.19             |
| A_68_P31000877 | chr16:97985236-97985280                           | NM_023663:104       | Ripk4      | INSIDE                 | 0.461                                                        | 0.243                          | 1900.11            | 461.68             | 0.112                          | 1559.73            | 174.56             |
| A_68_P22315261 | chr3:88520728-88520772                            | NM_001163310:-25    | Rit1       | PROMOTER               | 0.306                                                        | 11.631                         | 2239.03            | 26042.87           | 3.556                          | 2136.92            | 7598.66            |
| A_68_P32575424 | chrX:101176475-101176519                          | NM_011276:127       | Rlim       | INSIDE                 | 0.557                                                        | 4.956                          | 7279.61            | 36077.17           | 2.761                          | 6551.88            | 18092.29           |

| ProbeName      | Target position of probe on CpG island microarray | TargetID          | GeneSymbol | CpG island Description | Ratio of relative methylation (TiO <sub>2</sub> -NP/Vehicle) | Sham group                     |                    |                    | TiO <sub>2</sub> -H group      |                    |                    |
|----------------|---------------------------------------------------|-------------------|------------|------------------------|--------------------------------------------------------------|--------------------------------|--------------------|--------------------|--------------------------------|--------------------|--------------------|
|                |                                                   |                   |            |                        |                                                              | Relative methylation (Cy5/Cy3) | Cy3 signal (Input) | Cy5 signal (MeDIP) | Relative methylation (Cy5/Cy3) | Cy3 signal (Input) | Cy5 signal (MeDIP) |
| A_68_P26135404 | chr8:108218075-108218119                          | NM_001033320:3291 | Rltpr      | INSIDE                 | 0.35                                                         | 4.335                          | 11616.29           | 50354.34           | 1.519                          | 8602.76            | 13063.87           |
| A_68_P29073064 | chr13:58503963-58504007                           | NM_001168248:27   | Rmi1       | INSIDE                 | 0.636                                                        | 0.399                          | 2549.66            | 1018.02            | 0.254                          | 1919.51            | 487.12             |
| A_68_P29073057 | chr13:58503189-58503233                           | NR_031761:-398    | Rmi1       | DIVERGENT_PROMOTER     | 0.654                                                        | 0.377                          | 3808.08            | 1437.35            | 0.247                          | 2955.21            | 729.22             |
| A_68_P29073065 | chr13:58504155-58504199                           | NM_001168248:219  | Rmi1       | INSIDE                 | 0.396                                                        | 0.647                          | 2004.25            | 1296.31            | 0.256                          | 1642.08            | 420.89             |
| A_68_P24424174 | chr6:47601153-47601197                            | NR_002841:3919    | Rn4.5s     | DOWNSTREAM             | 0.617                                                        | 0.681                          | 10862.09           | 7397.97            | 0.42                           | 7550.37            | 3173.78            |
| A_68_P26022869 | chr8:87489816-87489860                            | NM_027187:72      | Rnaseh2a   | INSIDE                 | 0.57                                                         | 0.567                          | 1145.61            | 649.83             | 0.323                          | 895.36             | 289.29             |
| A_68_P29654922 | chr14:62951071-62951115                           | NM_026001:151     | Rnaseh2b   | INSIDE                 | 0.61                                                         | 3.021                          | 1081.64            | 3268.12            | 1.845                          | 857.52             | 1581.74            |
| A_68_P31929627 | chr19:5602038-5602082                             | NM_026616:188     | Rnaseh2c   | INSIDE                 | 0.6                                                          | 11.041                         | 2200.29            | 24292.80           | 6.619                          | 1810.45            | 11983.22           |
| A_68_P31023590 | chr17:7182740-7182784                             | NM_026611:-446    | Rnaset2b   | PROMOTER               | 0.156                                                        | 17.257                         | 15522.29           | 267874.10          | 2.7                            | 12991.05           | 35071.29           |
| A_68_P31023591 | chr17:7182888-7182932                             | NM_026611:-298    | Rnaset2b   | PROMOTER               | 0.204                                                        | 9.607                          | 4526.31            | 43486.38           | 1.959                          | 3437.95            | 6733.37            |
| A_68_P31023593 | chr17:7183066-7183110                             | NM_026611:-120    | Rnaset2b   | PROMOTER               | 0.402                                                        | 0.678                          | 7988.11            | 5417.89            | 0.273                          | 6776.83            | 1847.49            |
| A_68_P31023594 | chr17:7183213-7183257                             | NM_026611:26      | Rnaset2b   | PROMOTER               | 0.392                                                        | 1.443                          | 4827.05            | 6966.93            | 0.565                          | 3799.87            | 2148.30            |
| A_68_P28074048 | chr11:101329727-101329771                         | NM_009708:97      | Rnd2       | INSIDE                 | 0.191                                                        | 0.622                          | 2024.55            | 1258.59            | 0.119                          | 1467.10            | 173.92             |
| A_68_P21212081 | chr2:51003539-51003583                            | NM_028810:1071    | Rnd3       | INSIDE                 | 0.631                                                        | 0.245                          | 5281.23            | 1292.73            | 0.154                          | 3451.55            | 532.72             |
| A_68_P21212091 | chr2:51004685-51004729                            | NM_028810:-75     | Rnd3       | PROMOTER               | 0.638                                                        | 5.557                          | 283.68             | 1576.37            | 3.543                          | 201.31             | 713.21             |
| A_68_P23201329 | chr4:109148711-109148755                          | NM_013876:378     | Rnf11      | INSIDE                 | 0.448                                                        | 5.446                          | 13831.98           | 75331.74           | 2.439                          | 12448.27           | 30364.51           |
| A_68_P26616836 | chr9:70350943-70350987                            | NM_033604:568     | Rnf111     | INSIDE                 | 0.586                                                        | 2.393                          | 2245.79            | 5374.95            | 1.403                          | 1913.55            | 2683.86            |
| A_68_P31542302 | chr18:21120354-21120398                           | NM_026301:17251   | Rnf125     | INSIDE                 | 0.496                                                        | 4.340                          | 1907.77            | 8280.46            | 2.153                          | 1459.57            | 3142.49            |
| A_68_P27278802 | chr10:79229397-79229442                           | NM_144528:247     | Rnf126     | INSIDE                 | 0.312                                                        | 13.917                         | 5535.31            | 77032.25           | 4.346                          | 4338.90            | 18855.56           |
| A_68_P27278806 | chr10:79229855-79229899                           | NR_027505:-190    | Rnf126     | PROMOTER               | 0.427                                                        | 0.205                          | 3237.47            | 662.78             | 0.087                          | 2326.84            | 203.44             |
| A_68_P27278801 | chr10:79229322-79229366                           | NM_144528:322     | Rnf126     | INSIDE                 | 0.616                                                        | 2.837                          | 1463.18            | 4151.63            | 1.748                          | 1235.59            | 2160.32            |
| A_68_P27278810 | chr10:79230292-79230336                           | NR_027505:-628    | Rnf126     | DIVERGENT_PROMOTER     | 0.495                                                        | 0.680                          | 969.60             | 659.50             | 0.337                          | 741.97             | 249.99             |
| A_68_P32694935 | chrX:136145294-136145338                          | NM_023270:158     | Rnf128     | INSIDE                 | 0.507                                                        | 4.755                          | 989.47             | 4704.93            | 2.412                          | 1139.39            | 2748.48            |
| A_68_P22165084 | chr3:57539624-57539668                            | NM_011883:-341    | Rnf13      | PROMOTER               | 0.604                                                        | 0.348                          | 1894.88            | 658.73             | 0.21                           | 1531.76            | 321.89             |
| A_68_P31542490 | chr18:21160400-21160444                           | NM_019706:581     | Rnf138     | INSIDE                 | 0.368                                                        | 0.451                          | 3046.78            | 1375.54            | 0.166                          | 2206.69            | 366.92             |
| A_68_P31542491 | chr18:21160534-21160578                           | NM_019706:715     | Rnf138     | INSIDE                 | 0.388                                                        | 16.024                         | 6335.04            | 101514.80          | 6.225                          | 5214.47            | 32460.84           |
| A_68_P30250719 | chr15:58720548-58720592                           | NM_175226:-213    | Rnf139     | PROMOTER               | 0.533                                                        | 8.455                          | 992.10             | 8388.26            | 4.503                          | 814.77             | 3669.29            |
| A_68_P30250724 | chr15:58721209-58721253                           | NM_175226:447     | Rnf139     | INSIDE                 | 0.664                                                        | 3.265                          | 3107.94            | 10148.70           | 2.167                          | 2402.36            | 5205.76            |
| A_68_P28301681 | chr12:27100085-27100129                           | NM_001081977:15   | Rnf144a    | INSIDE                 | 0.319                                                        | 11.711                         | 2328.57            | 27269.81           | 3.73                           | 2055.05            | 7665.90            |
| A_68_P28301678 | chr12:27099581-27099625                           | NM_001081977:519  | Rnf144a    | INSIDE                 | 0.537                                                        | 0.212                          | 4006.26            | 851.18             | 0.114                          | 2914.36            | 332.56             |
| A_68_P28301682 | chr12:27100225-27100269                           | NM_001081977:-125 | Rnf144a    | PROMOTER               | 0.609                                                        | 3.080                          | 2302.21            | 7090.53            | 1.875                          | 1913.97            | 3589.07            |
| A_68_P29011800 | chr13:47218349-47218393                           | NM_146042:282     | Rnf144b    | INSIDE                 | 0.654                                                        | 0.579                          | 1024.65            | 593.04             | 0.378                          | 899.46             | 340.26             |
| A_68_P20502873 | chr1:107252976-107253020                          | NM_001160368:289  | Rnf152     | INSIDE                 | 0.487                                                        | 5.736                          | 2080.90            | 11936.69           | 2.792                          | 1850.31            | 5166.27            |
| A_68_P25365011 | chr7:107128763-107128807                          | NM_175388:184     | Rnf169     | INSIDE                 | 0.549                                                        | 3.766                          | 931.22             | 3506.74            | 2.067                          | 955.13             | 1974.54            |
| A_68_P29622736 | chr14:57021701-57021745                           | NM_001033043:189  | Rnf17      | INSIDE                 | 0.412                                                        | 4.847                          | 1414.69            | 6857.48            | 1.999                          | 1167.89            | 2334.29            |
| A_68_P29622735 | chr14:57021569-57021613                           | NM_001033043:57   | Rnf17      | INSIDE                 | 0.48                                                         | 4.939                          | 1975.11            | 9755.91            | 2.37                           | 1600.64            | 3794.28            |
| A_68_P28991174 | chr13:43711396-43711440                           | NM_183204:253     | Rnf182     | INSIDE                 | 0.17                                                         | 21.222                         | 2087.41            | 44298.75           | 3.615                          | 1941.40            | 7018.23            |
| A_68_P28991175 | chr13:43711506-43711550                           | NM_183204:363     | Rnf182     | INSIDE                 | 0.512                                                        | 3.743                          | 862.13             | 3226.68            | 1.915                          | 820.52             | 1570.97            |
| A_68_P27833619 | chr11:58752222-58752266                           | NM_022423:164     | Rnf187     | INSIDE                 | 0.515                                                        | 3.754                          | 558.96             | 2098.26            | 1.934                          | 480.28             | 928.62             |
| A_68_P30137691 | chr15:36213148-36213192                           | NM_013923:-268    | Rnf19a     | PROMOTER               | 0.274                                                        | 32.305                         | 445.42             | 14389.43           | 8.837                          | 1292.86            | 11424.69           |
| A_68_P23294679 | chr4:128735519-128735563                          | NM_029219:26      | Rnf19b     | INSIDE                 | 0.512                                                        | 4.535                          | 1529.12            | 6934.44            | 2.321                          | 1385.42            | 3215.13            |
| A_68_P22906127 | chr4:49645190-49645234                            | NM_001163263:281  | Rnf20      | INSIDE                 | 0.566                                                        | 0.511                          | 1327.38            | 677.92             | 0.289                          | 1036.09            | 299.31             |
| A_68_P23417945 | chr4:151687256-151687300                          | NM_001033489:5456 | Rnf207     | INSIDE                 | 0.354                                                        | 0.600                          | 1760.43            | 1056.56            | 0.213                          | 1356.25            | 288.48             |
| A_68_P21070804 | chr2:25097923-25097967                            | NM_176834:-504    | Rnf208     | DIVERGENT_PROMOTER     | 0.523                                                        | 0.708                          | 1178.71            | 835.00             | 0.371                          | 813.61             | 301.60             |
| A_68_P27045332 | chr10:31328778-31328822                           | NM_001146349:731  | Rnf217     | INSIDE                 | 0.419                                                        | 3.704                          | 883.54             | 3272.82            | 1.554                          | 841.42             | 1307.20            |
| A_68_P23234760 | chr4:117167587-117167631                          | NM_025739:1912    | Rnf220     | INSIDE                 | 0.52                                                         | 6.839                          | 2937.95            | 20092.45           | 3.554                          | 2220.64            | 7892.76            |

| ProbeName      | Target position of probe on CpG island microarray | TargetID          | GeneSymbol | CpG island Description | Ratio of relative methylation (TiO <sub>2</sub> -NP/Vehicle) | Sham group                     |                    |                    | TiO <sub>2</sub> -H group      |                    |                    |
|----------------|---------------------------------------------------|-------------------|------------|------------------------|--------------------------------------------------------------|--------------------------------|--------------------|--------------------|--------------------------------|--------------------|--------------------|
|                |                                                   |                   |            |                        |                                                              | Relative methylation (Cy5/Cy3) | Cy3 signal (Input) | Cy5 signal (MeDIP) | Relative methylation (Cy5/Cy3) | Cy3 signal (Input) | Cy5 signal (MeDIP) |
| A_68_P23234771 | chr4:117169165-117169209                          | NM_025739:334     | Rnf220     | INSIDE                 | 0.643                                                        | 0.247                          | 2128.46            | 526.55             | 0.159                          | 1549.72            | 246.35             |
| A_68_P23233435 | chr4:116962137-116962181                          | NM_025739:207362  | Rnf220     | INSIDE                 | 0.652                                                        | 0.584                          | 2392.16            | 1395.88            | 0.381                          | 1861.34            | 708.58             |
| A_68_P29618705 | chr14:56210981-56211025                           | NM_194346:376     | Rnf31      | INSIDE                 | 0.454                                                        | 0.380                          | 1353.20            | 513.71             | 0.172                          | 1041.78            | 179.47             |
| A_68_P23566422 | chr5:29522137-29522181                            | NM_021470:-2387   | Rnf32      | PROMOTER               | 0.309                                                        | 0.492                          | 2601.62            | 1279.35            | 0.152                          | 1750.48            | 265.88             |
| A_68_P22875663 | chr4:44181273-44181317                            | NM_001038993:-139 | Rnf38      | PROMOTER               | 0.602                                                        | 3.584                          | 562.19             | 2015.00            | 2.159                          | 535.36             | 1155.78            |
| A_68_P31166410 | chr17:37084116-37084160                           | NM_001099632:4143 | Rnf39      | INSIDE                 | 0.249                                                        | 19.915                         | 866.35             | 17253.39           | 4.955                          | 706.65             | 3501.29            |
| A_68_P23593765 | chr5:34669759-34669803                            | NM_011278:-9258   | Rnf4       | PROMOTER               | 0.332                                                        | 0.514                          | 1541.23            | 792.14             | 0.171                          | 1004.29            | 171.31             |
| A_68_P23593767 | chr5:34669934-34669978                            | NM_011278:-9082   | Rnf4       | PROMOTER               | 0.474                                                        | 1.481                          | 3944.20            | 5842.07            | 0.703                          | 2879.97            | 2024.01            |
| A_68_P29050814 | chr13:54788639-54788683                           | NM_001146025:509  | Rnf44      | INSIDE                 | 0.062                                                        | 27.456                         | 1216.48            | 33399.78           | 1.695                          | 926.66             | 1570.25            |
| A_68_P31154750 | chr17:34741259-34741304                           | NM_019403:-775    | Rnf5       | DIVERGENT_PROMOTER     | 0.254                                                        | 0.443                          | 2061.33            | 912.63             | 0.112                          | 1577.67            | 177.43             |
| A_68_P26747279 | chr9:96379047-96379091                            | NM_011279:-54     | Rnf7       | PROMOTER               | 0.604                                                        | 2.534                          | 2025.91            | 5132.96            | 1.531                          | 1488.76            | 2279.74            |
| A_68_P27989203 | chr11:86298068-86298112                           | NM_029788:-68     | Rnf1       | PROMOTER               | 0.158                                                        | 14.908                         | 2966.41            | 44223.39           | 2.36                           | 2976.60            | 7024.49            |
| A_68_P22826133 | chr4:33397493-33397537                            | NM_011884:229     | Rngtt      | INSIDE                 | 0.159                                                        | 15.167                         | 1904.43            | 28884.30           | 2.409                          | 1677.23            | 4041.17            |
| A_68_P25587156 | chr7:148354570-148354614                          | NM_001172101:-7   | Rnh1       | PROMOTER               | 0.649                                                        | 0.266                          | 2206.60            | 585.97             | 0.172                          | 1609.40            | 277.48             |
| A_68_P27930798 | chr11:76057462-76057506                           | NM_183263:247     | Rnmt1      | INSIDE                 | 0.443                                                        | 0.552                          | 991.05             | 547.21             | 0.245                          | 778.94             | 190.52             |
| A_68_P20638513 | chr1:137180458-137180502                          | NM_001159624:181  | Rnpep      | INSIDE                 | 0.322                                                        | 4.694                          | 1377.17            | 6464.01            | 1.51                           | 1492.42            | 2253.06            |
| A_68_P20451965 | chr1:94807505-94807549                            | NM_181405:125     | Rnpep1     | INSIDE                 | 0.441                                                        | 5.870                          | 1548.03            | 9087.58            | 2.589                          | 1266.31            | 3278.29            |
| A_68_P20451969 | chr1:94807947-94807991                            | NM_181405:567     | Rnpep1     | INSIDE                 | 0.511                                                        | 0.535                          | 1688.55            | 902.54             | 0.273                          | 1332.44            | 363.70             |
| A_68_P20451967 | chr1:94807773-94807817                            | NM_181405:393     | Rnpep1     | INSIDE                 | 0.385                                                        | 4.234                          | 1443.51            | 6111.13            | 1.632                          | 1160.36            | 1893.60            |
| A_68_P22301214 | chr3:85946197-85946241                            | NR_004418:-1609   | Rnu73b     | PROMOTER               | 0.647                                                        | 0.433                          | 1183.61            | 512.76             | 0.28                           | 957.74             | 268.48             |
| A_68_P26430635 | chr9:37240928-37240972                            | NM_001164767:-190 | Robo3      | PROMOTER               | 0.28                                                         | 18.396                         | 2537.72            | 46683.47           | 5.156                          | 2744.80            | 14151.15           |
| A_68_P31488614 | chr18:10181658-10181702                           | NM_009071:110     | Rock1      | INSIDE                 | 0.537                                                        | 12.341                         | 2717.38            | 33536.55           | 6.625                          | 2340.76            | 15507.87           |
| A_68_P31488617 | chr18:10181982-10182026                           | NM_009071:-214    | Rock1      | PROMOTER               | 0.65                                                         | 0.580                          | 1458.84            | 846.38             | 0.377                          | 1232.44            | 464.50             |
| A_68_P22957033 | chr4:59562622-59562666                            | NM_144904:-408    | Rod1       | PROMOTER               | 0.425                                                        | 0.512                          | 1062.72            | 544.14             | 0.218                          | 811.20             | 176.48             |
| A_68_P30513218 | chr16:5013781-5013827                             | NM_133185:-158    | Rogdi      | PROMOTER               | 0.502                                                        | 7.236                          | 2307.05            | 16693.76           | 3.633                          | 1868.98            | 6789.54            |
| A_68_P23147506 | chr4:99768281-99768325                            | NM_013845:-93     | Ror1       | PROMOTER               | 0.394                                                        | 0.652                          | 809.54             | 528.06             | 0.257                          | 787.03             | 202.35             |
| A_68_P23147511 | chr4:99768962-99769006                            | NM_013845:589     | Ror1       | INSIDE                 | 0.524                                                        | 4.067                          | 514.42             | 2092.27            | 2.13                           | 493.78             | 1051.97            |
| A_68_P29043022 | chr13:53381392-53381436                           | NM_013846:64      | Ror2       | INSIDE                 | 0.419                                                        | 6.860                          | 660.35             | 4530.21            | 2.876                          | 619.15             | 1780.47            |
| A_68_P29041999 | chr13:53214193-53214237                           | NM_013846:167264  | Ror2       | INSIDE                 | 0.499                                                        | 3.598                          | 2532.47            | 9112.96            | 1.794                          | 1890.85            | 3392.72            |
| A_68_P26609884 | chr9:69138237-69138281                            | NM_013646:636650  | Rora       | INSIDE                 | 0.108                                                        | 27.228                         | 1239.31            | 33744.02           | 2.935                          | 1064.86            | 3125.57            |
| A_68_P26609891 | chr9:69138894-69138938                            | NM_013646:637308  | Rora       | INSIDE                 | 0.28                                                         | 0.482                          | 1962.33            | 944.90             | 0.135                          | 1427.14            | 192.09             |
| A_68_P26605679 | chr9:68502496-68502540                            | NM_013646:910     | Rora       | INSIDE                 | 0.558                                                        | 0.272                          | 1996.70            | 543.07             | 0.152                          | 1380.80            | 209.44             |
| A_68_P26605669 | chr9:68501280-68501324                            | NM_013646:-306    | Rora       | PROMOTER               | 0.147                                                        | 0.734                          | 3092.11            | 2271.12            | 0.108                          | 2324.91            | 250.68             |
| A_68_P26609887 | chr9:69138471-69138515                            | NM_013646:636884  | Rora       | INSIDE                 | 0.555                                                        | 3.724                          | 828.81             | 3086.28            | 2.066                          | 723.37             | 1494.26            |
| A_68_P26352003 | chr9:22272492-22272536                            | NM_018739:286     | Rp9        | INSIDE                 | 0.339                                                        | 18.727                         | 2293.11            | 42943.43           | 6.35                           | 2097.46            | 13319.22           |
| A_68_P23313959 | chr4:132324309-132324353                          | NM_011284:56      | Rpa2       | INSIDE                 | 0.519                                                        | 0.310                          | 2193.65            | 680.46             | 0.161                          | 1770.70            | 285.23             |
| A_68_P23313962 | chr4:132324543-132324587                          | NM_011284:290     | Rpa2       | INSIDE                 | 0.586                                                        | 0.256                          | 4197.08            | 1073.47            | 0.15                           | 3046.55            | 456.63             |
| A_68_P20304095 | chr1:66747574-66747618                            | NM_025683:130     | Rpe        | INSIDE                 | 0.586                                                        | 0.207                          | 2601.77            | 537.27             | 0.121                          | 2152.99            | 260.73             |
| A_68_P22615131 | chr3:146184129-146184173                          | NM_027371:237     | Rpf1       | INSIDE                 | 0.49                                                         | 0.518                          | 1928.27            | 998.59             | 0.254                          | 1454.09            | 369.11             |
| A_68_P29604814 | chr14:52738859-52738903                           | NM_001168515:8303 | Rpgrip1    | INSIDE                 | 0.505                                                        | 0.455                          | 1582.58            | 720.39             | 0.23                           | 1134.72            | 260.71             |
| A_68_P31121837 | chr17:28465985-28466029                           | NM_011287:591     | Rpl10a     | INSIDE                 | 0.445                                                        | 4.799                          | 2961.29            | 14211.33           | 2.133                          | 2473.56            | 5276.74            |
| A_68_P31121839 | chr17:28466226-28466270                           | NM_011287:833     | Rpl10a     | INSIDE                 | 0.501                                                        | 0.524                          | 1371.14            | 717.90             | 0.262                          | 1168.63            | 306.29             |
| A_68_P31121836 | chr17:28465889-28465933                           | NM_011287:495     | Rpl10a     | INSIDE                 | 0.613                                                        | 0.687                          | 1005.85            | 691.03             | 0.421                          | 833.96             | 351.14             |
| A_68_P31121838 | chr17:28466106-28466150                           | NM_011287:713     | Rpl10a     | INSIDE                 | 0.639                                                        | 2.559                          | 1046.11            | 2676.97            | 1.634                          | 836.82             | 1367.68            |
| A_68_P23331869 | chr4:135609312-135609356                          | NM_025919:-48     | Rpl11      | PROMOTER               | 0.566                                                        | 5.952                          | 1166.35            | 6941.95            | 3.37                           | 938.02             | 3161.15            |
| A_68_P23331867 | chr4:135609136-135609180                          | NM_025919:128     | Rpl11      | INSIDE                 | 0.537                                                        | 3.081                          | 1172.32            | 3612.22            | 1.656                          | 1008.57            | 1670.22            |

| ProbeName      | Target position of probe on CpG island microarray | TargetID          | GeneSymbol | CpG island Description | Ratio of relative methylation (TiO <sub>2</sub> -NP/Vehicle) | Sham group                     |                    |                    | TiO <sub>2</sub> -H group      |                    |                    |
|----------------|---------------------------------------------------|-------------------|------------|------------------------|--------------------------------------------------------------|--------------------------------|--------------------|--------------------|--------------------------------|--------------------|--------------------|
|                |                                                   |                   |            |                        |                                                              | Relative methylation (Cy5/Cy3) | Cy3 signal (Input) | Cy5 signal (MeDIP) | Relative methylation (Cy5/Cy3) | Cy3 signal (Input) | Cy5 signal (MeDIP) |
| A_68_P25091299 | chr7:52384642-52384686                            | NM_009438:-559    | Rpl13a     | PROMOTER               | 0.309                                                        | 1.964                          | 2380.17            | 4674.16            | 0.608                          | 1891.93            | 1149.53            |
| A_68_P26878665 | chr9:120486576-120486620                          | NM_025974:5965    | Rpl14      | DOWNSTREAM             | 0.434                                                        | 4.003                          | 1518.47            | 6078.95            | 1.737                          | 1211.74            | 2104.56            |
| A_68_P23418024 | chr4:151700327-151700371                          | NM_009079:362     | Rpl22      | INSIDE                 | 0.188                                                        | 22.183                         | 1550.58            | 34396.87           | 4.167                          | 1346.53            | 5610.95            |
| A_68_P22019227 | chr3:28704574-28704618                            | NM_026517:164     | Rpl22l1    | INSIDE                 | 0.575                                                        | 0.505                          | 1306.69            | 659.33             | 0.29                           | 1055.22            | 306.13             |
| A_68_P25408483 | chr7:116662453-116662497                          | NM_011975:-234    | Rpl27a     | PROMOTER               | 0.45                                                         | 0.348                          | 2305.35            | 802.07             | 0.157                          | 1706.44            | 267.13             |
| A_68_P26803290 | chr9:106331991-106332035                          | NM_009082:143     | Rpl29      | INSIDE                 | 0.553                                                        | 2.631                          | 7925.55            | 20850.19           | 1.454                          | 6389.13            | 9289.27            |
| A_68_P30128581 | chr15:34373372-34373416                           | NM_001163485:-363 | Rpl30      | DIVERGENT_PROMOTER     | 0.404                                                        | 5.892                          | 2755.46            | 16234.42           | 2.381                          | 2301.77            | 5481.64            |
| A_68_P30128580 | chr15:34373273-34373317                           | NM_001163485:-263 | Rpl30      | DIVERGENT_PROMOTER     | 0.423                                                        | 0.397                          | 1824.14            | 724.93             | 0.168                          | 1344.95            | 225.99             |
| A_68_P20165362 | chr1:39424508-39424553                            | NM_053257:-165    | Rpl31      | PROMOTER               | 0.553                                                        | 6.584                          | 615.35             | 4051.50            | 3.638                          | 562.31             | 2045.68            |
| A_68_P20165367 | chr1:39425174-39425218                            | NM_053257:501     | Rpl31      | INSIDE                 | 0.619                                                        | 0.346                          | 1655.86            | 572.29             | 0.214                          | 1238.15            | 265.09             |
| A_68_P21151631 | chr2:38860577-38860621                            | NM_025592:53      | Rpl35      | INSIDE                 | 0.582                                                        | 4.609                          | 2911.63            | 13419.21           | 2.684                          | 2300.59            | 6175.07            |
| A_68_P30655993 | chr16:33056579-33056624                           | NM_021338:2       | Rpl35a     | INSIDE                 | 0.473                                                        | 3.134                          | 1847.44            | 5789.03            | 1.483                          | 1534.97            | 2276.64            |
| A_68_P28149045 | chr11:114530045-114530089                         | NM_001048058:-28  | Rpl38      | PROMOTER               | 0.14                                                         | 1.481                          | 2640.77            | 3910.89            | 0.207                          | 1810.70            | 374.31             |
| A_68_P28149043 | chr11:114529888-114529932                         | NM_001048058:-184 | Rpl38      | PROMOTER               | 0.436                                                        | 0.514                          | 997.65             | 512.69             | 0.224                          | 764.52             | 171.46             |
| A_68_P27541976 | chr10:127986184-127986228                         | NM_018860:18      | Rpl41      | INSIDE                 | 0.356                                                        | 0.353                          | 3206.78            | 1133.47            | 0.126                          | 2214.88            | 278.39             |
| A_68_P30351089 | chr15:76734484-76734528                           | NM_012053:6       | Rpl8       | INSIDE                 | 0.173                                                        | 0.581                          | 3096.84            | 1798.05            | 0.101                          | 2143.99            | 215.53             |
| A_68_P30351091 | chr15:76734692-76734736                           | NM_012053:214     | Rpl8       | INSIDE                 | 0.486                                                        | 0.308                          | 1728.44            | 532.36             | 0.15                           | 1188.90            | 177.79             |
| A_68_P24010226 | chr5:116009731-116009775                          | NM_007475:277     | Rplp0      | INSIDE                 | 0.62                                                         | 3.015                          | 1157.91            | 3490.80            | 1.869                          | 927.84             | 1734.05            |
| A_68_P24619664 | chr6:88035091-88035135                            | NM_133933:646     | Rpn1       | INSIDE                 | 0.541                                                        | 5.774                          | 782.78             | 4519.63            | 3.124                          | 608.45             | 1900.87            |
| A_68_P31163327 | chr17:36394876-36394920                           | NM_026308:-107    | Rpp21      | PROMOTER               | 0.342                                                        | 15.373                         | 1216.24            | 18697.89           | 5.253                          | 1066.74            | 5603.70            |
| A_68_P26542152 | chr9:57352020-57352064                            | NM_133982:134     | Rpp25      | INSIDE                 | 0.623                                                        | 0.410                          | 1348.97            | 553.46             | 0.256                          | 1025.33            | 262.28             |
| A_68_P21780565 | chr2:157854409-157854453                          | NM_027434:-99     | Rprd1b     | PROMOTER               | 0.11                                                         | 16.854                         | 3826.39            | 64488.23           | 1.854                          | 2922.26            | 5418.75            |
| A_68_P21780563 | chr2:157854132-157854176                          | NM_027434:-375    | Rprd1b     | PROMOTER               | 0.57                                                         | 6.088                          | 994.44             | 6054.36            | 3.47                           | 818.96             | 2841.53            |
| A_68_P22345830 | chr3:95622664-95622708                            | NM_001081293:190  | Rprd2      | INSIDE                 | 0.219                                                        | 1.512                          | 1089.67            | 1648.07            | 0.331                          | 944.70             | 312.56             |
| A_68_P28086208 | chr11:103510960-103511004                         | NM_001033212:160  | Rprml      | INSIDE                 | 0.631                                                        | 0.721                          | 1681.18            | 1211.44            | 0.455                          | 1425.68            | 648.19             |
| A_68_P25091259 | chr7:52379751-52379795                            | NM_013725:-13     | Rps11      | PROMOTER               | 0.499                                                        | 0.464                          | 1373.95            | 637.04             | 0.231                          | 1095.56            | 253.49             |
| A_68_P25456593 | chr7:125259495-125259539                          | NM_170669:145     | Rps15a     | INSIDE                 | 0.354                                                        | 14.448                         | 1414.01            | 20430.20           | 5.122                          | 1806.14            | 9250.36            |
| A_68_P25007073 | chr7:25669913-25669957                            | NM_023133:202     | Rps19      | INSIDE                 | 0.152                                                        | 14.538                         | 1608.63            | 23386.54           | 2.207                          | 1366.81            | 3016.65            |
| A_68_P25007070 | chr7:25669613-25669657                            | NM_023133:-98     | Rps19      | PROMOTER               | 0.61                                                         | 0.740                          | 3185.18            | 2355.69            | 0.451                          | 2321.96            | 1047.36            |
| A_68_P22694582 | chr4:3762328-3762372                              | NM_026147:397     | Rps20      | INSIDE                 | 0.51                                                         | 0.538                          | 1858.89            | 1000.46            | 0.275                          | 1428.48            | 392.41             |
| A_68_P21902494 | chr2:179991894-179991938                          | NM_025587:-167    | Rps21      | PROMOTER               | 0.638                                                        | 18.338                         | 2705.41            | 49611.95           | 11.705                         | 2314.11            | 27085.52           |
| A_68_P26596129 | chr9:66793897-66793941                            | NM_026467:-6      | Rps27l     | PROMOTER               | 0.629                                                        | 0.649                          | 789.64             | 512.35             | 0.408                          | 651.37             | 266.01             |
| A_68_P28513108 | chr12:70260224-70260268                           | NM_009093:-73     | Rps29      | DIVERGENT_PROMOTER     | 0.326                                                        | 5.931                          | 1679.86            | 9962.69            | 1.935                          | 1391.30            | 2691.93            |
| A_68_P24973639 | chr7:13507675-13507719                            | NM_009095:37      | Rps5       | INSIDE                 | 0.464                                                        | 6.075                          | 388.59             | 2360.77            | 2.821                          | 336.68             | 949.72             |
| A_68_P31024851 | chr17:7374165-7374209                             | NM_011299:-277    | Rps6ka2    | PROMOTER               | 0.448                                                        | 0.302                          | 2317.05            | 700.25             | 0.135                          | 1794.94            | 243.17             |
| A_68_P31936363 | chr19:6914626-6914670                             | NM_019924:443     | Rps6ka4    | INSIDE                 | 0.227                                                        | 0.500                          | 2039.11            | 1019.05            | 0.113                          | 1574.09            | 178.37             |
| A_68_P31936365 | chr19:6914837-6914881                             | NM_019924:233     | Rps6ka4    | INSIDE                 | 0.577                                                        | 0.266                          | 1956.69            | 520.17             | 0.153                          | 1575.51            | 241.71             |
| A_68_P31936369 | chr19:6915237-6915281                             | NM_019924:-167    | Rps6ka4    | PROMOTER               | 0.638                                                        | 0.407                          | 1185.19            | 482.34             | 0.26                           | 947.33             | 246.05             |
| A_68_P28683722 | chr12:101962780-101962824                         | NM_153587:436     | Rps6ka5    | INSIDE                 | 0.486                                                        | 0.528                          | 2157.54            | 1138.45            | 0.256                          | 1682.36            | 431.45             |
| A_68_P32599598 | chrX:108576717-108576761                          | NM_025949:74816   | Rps6ka6    | INSIDE                 | 0.51                                                         | 3.085                          | 731.69             | 2256.93            | 1.573                          | 890.99             | 1401.57            |
| A_68_P28314231 | chr12:29320191-29320235                           | NM_011300:606     | Rps7       | INSIDE                 | 0.217                                                        | 6.336                          | 2673.21            | 16937.75           | 1.373                          | 2906.76            | 3990.97            |
| A_68_P24946923 | chr7:3656384-3656428                              | NM_029767:764     | Rps9       | INSIDE                 | 0.477                                                        | 0.282                          | 2863.93            | 806.48             | 0.134                          | 2193.11            | 294.80             |
| A_68_P22824535 | chr4:33070523-33070567                            | NM_027491:572     | Rragd      | INSIDE                 | 0.313                                                        | 0.567                          | 1445.46            | 819.16             | 0.178                          | 1195.33            | 212.32             |
| A_68_P25434388 | chr7:121260597-121260641                          | NM_025846:677     | Rras2      | INSIDE                 | 0.313                                                        | 6.577                          | 2077.90            | 13665.91           | 2.059                          | 1835.47            | 3779.26            |
| A_68_P21704892 | chr2:143836307-143836351                          | NM_024281:671     | Rrbp1      | INSIDE                 | 0.178                                                        | 2.350                          | 2030.18            | 4771.76            | 0.419                          | 1560.92            | 653.87             |
| A_68_P21704898 | chr2:143837238-143837282                          | NM_024281:-261    | Rrbp1      | PROMOTER               | 0.406                                                        | 5.698                          | 1486.26            | 8468.90            | 2.315                          | 1516.64            | 3511.11            |



| ProbeName      | Target position of probe on CpG island microarray | TargetID           | GeneSymbol | CpG island Description | Ratio of relative methylation (TiO <sub>2</sub> -NP/Vehicle) | Sham group                     |                    |                    | TiO <sub>2</sub> -H group      |                    |                    |
|----------------|---------------------------------------------------|--------------------|------------|------------------------|--------------------------------------------------------------|--------------------------------|--------------------|--------------------|--------------------------------|--------------------|--------------------|
|                |                                                   |                    |            |                        |                                                              | Relative methylation (Cy5/Cy3) | Cy3 signal (Input) | Cy5 signal (MeDIP) | Relative methylation (Cy5/Cy3) | Cy3 signal (Input) | Cy5 signal (MeDIP) |
| A_68_P28956729 | chr13:37918014-37918058                           | NM_001177868:-744  | Rreb1      | PROMOTER               | 0.348                                                        | 5.020                          | 2308.13            | 11585.84           | 1.748                          | 1847.22            | 3229.62            |
| A_68_P28957528 | chr13:38022622-38022667                           | NM_001177869:41905 | Rreb1      | INSIDE                 | 0.62                                                         | 2.904                          | 814.66             | 2365.55            | 1.799                          | 596.37             | 1073.06            |
| A_68_P28291147 | chr12:25393381-25393425                           | NM_009104:284      | Rrm2       | INSIDE                 | 0.6                                                          | 0.343                          | 2790.42            | 957.38             | 0.206                          | 2209.20            | 454.99             |
| A_68_P28291143 | chr12:25392901-25392945                           | NM_009104:-196     | Rrm2       | PROMOTER               | 0.423                                                        | 0.647                          | 4815.13            | 3115.75            | 0.273                          | 3761.10            | 1028.33            |
| A_68_P31143302 | chr17:32173587-32173631                           | NM_028244:502      | Rrp1b      | INSIDE                 | 0.314                                                        | 18.119                         | 2787.67            | 50510.74           | 5.696                          | 2814.73            | 16033.01           |
| A_68_P31208271 | chr17:46811147-46811191                           | NM_144857:36       | Rrp36      | INSIDE                 | 0.439                                                        | 4.216                          | 5040.76            | 21250.47           | 1.849                          | 4306.92            | 7965.26            |
| A_68_P30386713 | chr15:82953055-82953099                           | NM_029101:155      | Rrp7a      | INSIDE                 | 0.574                                                        | 0.649                          | 3025.07            | 1962.44            | 0.373                          | 2264.48            | 843.87             |
| A_68_P25351151 | chr7:104728309-104728353                          | NM_001081267:-75   | Rsf1       | DIVERGENT_PROMOTER     | 0.608                                                        | 0.334                          | 4624.77            | 1542.75            | 0.203                          | 3248.42            | 659.37             |
| A_68_P25351157 | chr7:104729030-104729074                          | NM_001081267:647   | Rsf1       | INSIDE                 | 0.527                                                        | 3.732                          | 903.58             | 3372.26            | 1.966                          | 794.66             | 1561.99            |
| A_68_P30546791 | chr16:11203150-11203194                           | NM_025546:213      | Rsl1d1     | INSIDE                 | 0.482                                                        | 5.165                          | 5654.18            | 29205.26           | 2.492                          | 4654.34            | 11598.90           |
| A_68_P24991219 | chr7:19650979-19651023                            | NM_001159671:10965 | Rsph6a     | INSIDE                 | 0.525                                                        | 9.095                          | 4047.08            | 36808.89           | 4.773                          | 3107.96            | 14832.81           |
| A_68_P23271474 | chr4:124663490-124663534                          | NM_138683:-161     | Rspo1      | PROMOTER               | 0.459                                                        | 10.100                         | 1037.73            | 10480.83           | 4.635                          | 986.54             | 4572.54            |
| A_68_P23271504 | chr4:124667418-124667462                          | NM_138683:3767     | Rspo1      | INSIDE                 | 0.536                                                        | 0.431                          | 5276.89            | 2274.32            | 0.231                          | 3784.04            | 874.32             |
| A_68_P26078523 | chr8:97125990-97126034                            | NM_026274:172      | Rspry1     | INSIDE                 | 0.585                                                        | 4.051                          | 1785.52            | 7232.72            | 2.369                          | 1389.96            | 3292.47            |
| A_68_P26022781 | chr8:87469555-87469599                            | NM_144929:-1313    | Rtbdn      | DIVERGENT_PROMOTER     | 0.419                                                        | 0.514                          | 983.75             | 505.69             | 0.215                          | 811.88             | 174.66             |
| A_68_P24591678 | chr6:83092414-83092458                            | NM_009106:5359     | Rtkn       | INSIDE                 | 0.462                                                        | 0.402                          | 1708.60            | 686.72             | 0.186                          | 1175.53            | 218.37             |
| A_68_P27215086 | chr10:67442552-67442596                           | NM_001081346:229   | Rtkn2      | INSIDE                 | 0.508                                                        | 3.967                          | 1490.27            | 5912.28            | 2.017                          | 1317.87            | 2658.03            |
| A_68_P27215083 | chr10:67442230-67442274                           | NM_001081346:-93   | Rtkn2      | PROMOTER               | 0.559                                                        | 4.236                          | 8244.42            | 34922.94           | 2.368                          | 5613.62            | 13295.19           |
| A_68_P24992460 | chr7:19868360-19868404                            | NM_001025364:-8065 | Rtn2       | PROMOTER               | 0.501                                                        | 0.413                          | 2113.73            | 873.17             | 0.207                          | 1634.28            | 338.45             |
| A_68_P31940080 | chr19:7557684-7557728                             | NM_053076:65       | Rtn3       | INSIDE                 | 0.513                                                        | 0.579                          | 784.59             | 454.49             | 0.297                          | 591.30             | 175.79             |
| A_68_P27675742 | chr11:29593934-29593982                           | NM_194051:185      | Rtn4       | INSIDE                 | 0.376                                                        | 0.381                          | 1837.39            | 699.14             | 0.143                          | 1210.19            | 173.32             |
| A_68_P30577646 | chr16:18127970-18128014                           | NM_022982:194      | Rtn4r      | INSIDE                 | 0.604                                                        | 0.376                          | 1638.74            | 616.49             | 0.227                          | 1184.28            | 269.11             |
| A_68_P27924777 | chr11:75008575-75008619                           | NM_177708:1102     | Rtn4rl1    | INSIDE                 | 0.198                                                        | 0.339                          | 4912.53            | 1665.71            | 0.067                          | 3102.47            | 208.35             |
| A_68_P27924762 | chr11:75006792-75006836                           | NM_177708:-680     | Rtn4rl1    | DIVERGENT_PROMOTER     | 0.599                                                        | 0.252                          | 4979.75            | 1255.09            | 0.151                          | 3603.38            | 543.89             |
| A_68_P27924905 | chr11:75027578-75027622                           | NM_177708:20106    | Rtn4rl1    | INSIDE                 | 0.6                                                          | 0.636                          | 1520.47            | 967.61             | 0.382                          | 1191.96            | 455.41             |
| A_68_P21395235 | chr2:84729286-84729330                            | NM_199223:-2459    | Rtn4rl2    | PROMOTER               | 0.056                                                        | 2.076                          | 2809.16            | 5831.72            | 0.116                          | 1973.51            | 228.67             |
| A_68_P21395236 | chr2:84729363-84729407                            | NM_199223:-2535    | Rtn4rl2    | PROMOTER               | 0.076                                                        | 1.707                          | 2317.36            | 3956.25            | 0.129                          | 1508.46            | 194.70             |
| A_68_P21395110 | chr2:84712227-84712271                            | NM_199223:14601    | Rtn4rl2    | INSIDE                 | 0.345                                                        | 12.961                         | 2834.90            | 36743.06           | 4.466                          | 2534.35            | 11317.36           |
| A_68_P21395215 | chr2:84726754-84726798                            | NM_199223:73       | Rtn4rl2    | INSIDE                 | 0.368                                                        | 0.404                          | 1526.41            | 616.37             | 0.149                          | 1142.52            | 169.83             |
| A_68_P21395229 | chr2:84728472-84728517                            | NM_199223:-1645    | Rtn4rl2    | PROMOTER               | 0.233                                                        | 1.928                          | 1315.40            | 2535.51            | 0.448                          | 1090.47            | 488.98             |
| A_68_P21395214 | chr2:84726634-84726678                            | NM_199223:193      | Rtn4rl2    | INSIDE                 | 0.433                                                        | 1.370                          | 2335.26            | 3198.31            | 0.593                          | 1839.48            | 1091.08            |
| A_68_P31909673 | chr18:89141458-89141502                           | NM_175542:299      | Rttm       | INSIDE                 | 0.416                                                        | 0.167                          | 3789.33            | 631.49             | 0.069                          | 2510.12            | 173.97             |
| A_68_P31909672 | chr18:89141358-89141413                           | NM_175542:204      | Rttm       | INSIDE                 | 0.458                                                        | 0.483                          | 1081.71            | 522.97             | 0.221                          | 775.31             | 171.62             |
| A_68_P28073802 | chr11:101286306-101286350                         | NM_172566:-70      | Runde1     | PROMOTER               | 0.333                                                        | 10.625                         | 4366.13            | 46391.26           | 3.541                          | 3995.13            | 14145.36           |
| A_68_P28079339 | chr11:102260809-102260853                         | NM_016759:6082     | Runde3a    | INSIDE                 | 0.024                                                        | 11.191                         | 3349.14            | 37480.81           | 0.269                          | 2382.09            | 640.17             |
| A_68_P28079292 | chr11:102254981-102255025                         | NM_016759:254      | Runde3a    | INSIDE                 | 0.137                                                        | 1.750                          | 1018.94            | 1782.68            | 0.239                          | 871.52             | 208.48             |
| A_68_P23468796 | chr5:8622618-8622662                              | NM_198620:312      | Runde3b    | INSIDE                 | 0.236                                                        | 9.506                          | 2070.16            | 19679.79           | 2.246                          | 1740.61            | 3910.05            |
| A_68_P30970267 | chr16:92606200-92606244                           | NM_001111023:91351 | Runx1      | INSIDE                 | 0.134                                                        | 2.535                          | 3470.72            | 8799.83            | 0.34                           | 2598.87            | 883.04             |
| A_68_P30970265 | chr16:92605955-92605999                           | NM_001111023:91597 | Runx1      | INSIDE                 | 0.133                                                        | 4.865                          | 1646.43            | 8010.43            | 0.649                          | 1409.60            | 914.16             |
| A_68_P30970952 | chr16:92697859-92697903                           | NM_001111023:-307  | Runx1      | PROMOTER               | 0.319                                                        | 1.900                          | 1252.70            | 2379.54            | 0.606                          | 1166.09            | 706.42             |
| A_68_P31196997 | chr17:44873430-44873474                           | NM_001145920:145   | Runx2      | INSIDE                 | 0.541                                                        | 4.250                          | 1208.78            | 5137.89            | 2.301                          | 1097.15            | 2524.36            |
| A_68_P31196991 | chr17:44872774-44872818                           | NM_001145920:801   | Runx2      | INSIDE                 | 0.659                                                        | 0.727                          | 2709.00            | 1968.73            | 0.479                          | 2095.26            | 1003.58            |
| A_68_P31196993 | chr17:44872985-44873029                           | NM_001145920:591   | Runx2      | INSIDE                 | 0.599                                                        | 0.663                          | 987.64             | 654.32             | 0.397                          | 876.10             | 347.81             |
| A_68_P23326917 | chr4:134708685-134708729                          | NM_019732:32147    | Runx3      | INSIDE                 | 0.512                                                        | 6.904                          | 3885.39            | 26825.84           | 3.532                          | 3039.98            | 10736.17           |
| A_68_P23326916 | chr4:134708430-134708475                          | NM_019732:31893    | Runx3      | INSIDE                 | 0.626                                                        | 4.864                          | 260.86             | 1268.90            | 3.043                          | 269.36             | 819.60             |
| A_68_P22317129 | chr3:88894411-88894455                            | NM_001083808:-479  | Rusc1      | PROMOTER               | 0.377                                                        | 7.916                          | 2872.15            | 22737.08           | 2.988                          | 2249.68            | 6722.41            |

| ProbeName      | Target position of probe on CpG island microarray | TargetID           | GeneSymbol | CpG island Description | Ratio of relative methylation (TiO <sub>2</sub> -NP/Vehicle) | Sham group                     |                    |                    | TiO <sub>2</sub> -H group      |                    |                    |
|----------------|---------------------------------------------------|--------------------|------------|------------------------|--------------------------------------------------------------|--------------------------------|--------------------|--------------------|--------------------------------|--------------------|--------------------|
|                |                                                   |                    |            |                        |                                                              | Relative methylation (Cy5/Cy3) | Cy3 signal (Input) | Cy5 signal (MeDIP) | Relative methylation (Cy5/Cy3) | Cy3 signal (Input) | Cy5 signal (MeDIP) |
| A_68_P22871354 | chr4:43394705-43394749                            | NM_001037709:-127  | Rusc2      | PROMOTER               | 0.308                                                        | 7.560                          | 1047.07            | 7915.96            | 2.33                           | 1027.65            | 2394.13            |
| A_68_P26700013 | chr9:86465522-86465566                            | NM_001145969:-50   | Rwdd2a     | DIVERGENT_PROMOTER     | 0.296                                                        | 1.776                          | 2769.39            | 4919.01            | 0.525                          | 2306.18            | 1210.58            |
| A_68_P25842222 | chr8:48619150-48619194                            | NM_203507:174      | Rwdd4a     | INSIDE                 | 0.599                                                        | 0.439                          | 1287.28            | 564.78             | 0.263                          | 1069.96            | 281.33             |
| A_68_P30013962 | chr15:10966866-10966910                           | NM_178717:835      | Rxfp3      | INSIDE                 | 0.384                                                        | 12.376                         | 3024.76            | 37434.95           | 4.748                          | 2652.57            | 12593.33           |
| A_68_P21085998 | chr2:27532103-27532149                            | NM_011305:-594     | Rxra       | PROMOTER               | 0.427                                                        | 0.545                          | 1804.65            | 983.61             | 0.233                          | 1375.65            | 320.42             |
| A_68_P21086006 | chr2:27533318-27533362                            | NM_011305:620      | Rxra       | INSIDE                 | 0.623                                                        | 5.439                          | 1315.61            | 7155.05            | 3.388                          | 1084.55            | 3674.72            |
| A_68_P24691293 | chr6:100237792-100237836                          | NM_019743:-462     | Rybp       | PROMOTER               | 0.261                                                        | 14.916                         | 2055.04            | 30652.63           | 3.895                          | 1817.03            | 7077.70            |
| A_68_P24691294 | chr6:100237868-100237912                          | NM_019743:-538     | Rybp       | PROMOTER               | 0.373                                                        | 8.881                          | 669.90             | 5949.24            | 3.315                          | 603.05             | 1998.82            |
| A_68_P24691288 | chr6:100237003-100237047                          | NM_019743:328      | Rybp       | INSIDE                 | 0.64                                                         | 4.719                          | 1032.72            | 4872.93            | 3.02                           | 924.48             | 2792.05            |
| A_68_P28830400 | chr13:12198333-12198377                           | NM_023868:858      | Ryr2       | INSIDE                 | 0.537                                                        | 0.372                          | 1812.19            | 674.09             | 0.2                            | 1552.39            | 310.36             |
| A_68_P28830403 | chr13:12198675-12198719                           | NM_023868:516      | Ryr2       | INSIDE                 | 0.581                                                        | 3.735                          | 1063.44            | 3972.17            | 2.171                          | 885.97             | 1923.72            |
| A_68_P22336986 | chr3:93359142-93359186                            | NM_009112:126      | Sl00a10    | INSIDE                 | 0.612                                                        | 2.839                          | 1737.25            | 4932.13            | 1.736                          | 1572.34            | 2729.77            |
| A_68_P22336828 | chr3:93324960-93325004                            | NM_016740:565      | Sl00a11    | INSIDE                 | 0.552                                                        | 0.683                          | 901.76             | 615.53             | 0.377                          | 834.50             | 314.26             |
| A_68_P26344891 | chr9:20780545-20780589                            | NM_010333:671      | S1pr2      | INSIDE                 | 0.261                                                        | 5.632                          | 2033.75            | 11454.52           | 1.467                          | 1714.83            | 2516.32            |
| A_68_P29032311 | chr13:51504011-51504055                           | NM_010101:46       | S1pr3      | INSIDE                 | 0.635                                                        | 0.417                          | 3748.54            | 1563.60            | 0.265                          | 2785.80            | 737.42             |
| A_68_P31932823 | chr19:6118207-6118251                             | NM_133678:358      | Sac3d1     | INSIDE                 | 0.47                                                         | 3.525                          | 1080.85            | 3809.71            | 1.655                          | 900.03             | 1489.57            |
| A_68_P29648702 | chr14:61792214-61792258                           | NM_172809:34943    | Sacs       | INSIDE                 | 0.405                                                        | 0.628                          | 897.83             | 564.00             | 0.254                          | 778.33             | 197.78             |
| A_68_P24981209 | chr7:16973109-16973153                            | NM_019748:4        | Sae1       | INSIDE                 | 0.57                                                         | 4.718                          | 1704.34            | 8041.02            | 2.688                          | 1342.46            | 3608.64            |
| A_68_P31257082 | chr17:56724139-56724183                           | NM_001029979:-154  | Safb2      | DIVERGENT_PROMOTER     | 0.443                                                        | 5.400                          | 1573.14            | 8495.49            | 2.391                          | 1356.65            | 3243.72            |
| A_68_P31257075 | chr17:56723467-56723511                           | NM_001029979:518   | Safb2      | INSIDE                 | 0.522                                                        | 0.477                          | 4679.57            | 2232.96            | 0.249                          | 3157.61            | 786.13             |
| A_68_P26044785 | chr8:91566664-91566708                            | NM_021390:1375     | Sall1      | INSIDE                 | 0.554                                                        | 6.166                          | 1436.93            | 8860.52            | 3.414                          | 1236.93            | 4222.95            |
| A_68_P26044645 | chr8:91549654-91549698                            | NM_021390:18385    | Sall1      | DOWNSTREAM             | 0.493                                                        | 1.432                          | 2948.71            | 4223.94            | 0.706                          | 2292.52            | 1618.33            |
| A_68_P31868115 | chr18:81184119-81184163                           | NM_178280:-823     | Sall3      | PROMOTER               | 0.517                                                        | 0.512                          | 2867.29            | 1468.64            | 0.265                          | 2153.85            | 570.39             |
| A_68_P31868107 | chr18:81182856-81182900                           | NM_178280:439      | Sall3      | INSIDE                 | 0.566                                                        | 5.157                          | 3708.02            | 19120.81           | 2.916                          | 3019.58            | 8806.17            |
| A_68_P31868010 | chr18:81171392-81171436                           | NM_178280:11903    | Sall3      | INSIDE                 | 0.631                                                        | 4.796                          | 1236.88            | 5932.56            | 3.025                          | 1065.01            | 3222.15            |
| A_68_P31868114 | chr18:81184015-81184059                           | NM_178280:-719     | Sall3      | PROMOTER               | 0.219                                                        | 2.079                          | 991.64             | 2061.64            | 0.455                          | 858.83             | 390.69             |
| A_68_P31867990 | chr18:81169207-81169251                           | NM_178280:14089    | Sall3      | INSIDE                 | 0.581                                                        | 2.418                          | 1949.25            | 4714.21            | 1.404                          | 1663.98            | 2336.29            |
| A_68_P21843418 | chr2:168591344-168591388                          | NM_175303:1335     | Sall4      | INSIDE                 | 0.26                                                         | 5.668                          | 1391.82            | 7889.47            | 1.473                          | 1195.18            | 1761.08            |
| A_68_P21911581 | chr2:181334008-181334052                          | NM_172676:-178     | Samd10     | DIVERGENT_PROMOTER     | 0.417                                                        | 0.521                          | 966.50             | 503.60             | 0.217                          | 783.67             | 170.12             |
| A_68_P30224202 | chr15:53734012-53734057                           | NM_177225:-43      | Samd12     | PROMOTER               | 0.663                                                        | 0.413                          | 1206.15            | 498.54             | 0.274                          | 976.51             | 267.51             |
| A_68_P28036074 | chr11:94871790-94871834                           | NM_146025:620      | Samd14     | INSIDE                 | 0.418                                                        | 5.804                          | 2468.23            | 14326.48           | 2.427                          | 1805.32            | 4382.41            |
| A_68_P29578866 | chr14:47501811-47501855                           | NM_001037221:-807  | Samd4      | PROMOTER               | 0.415                                                        | 5.047                          | 1814.27            | 9156.95            | 2.096                          | 1631.39            | 3419.32            |
| A_68_P29578876 | chr14:47503079-47503123                           | NM_001037221:461   | Samd4      | INSIDE                 | 0.461                                                        | 7.248                          | 1458.44            | 10571.13           | 3.343                          | 1202.81            | 4021.40            |
| A_68_P29578888 | chr14:47504466-47504510                           | NM_001037221:1849  | Samd4      | INSIDE                 | 0.492                                                        | 0.368                          | 3060.90            | 1126.13            | 0.181                          | 2296.67            | 415.48             |
| A_68_P25021894 | chr7:29221444-29221488                            | NM_175021:-256     | Samd4b     | DIVERGENT_PROMOTER     | 0.576                                                        | 5.393                          | 2380.23            | 12836.48           | 3.105                          | 1883.61            | 5848.84            |
| A_68_P29454669 | chr14:22569927-22569971                           | NM_026283:196      | Samd8      | INSIDE                 | 0.628                                                        | 3.707                          | 1125.54            | 4172.01            | 2.329                          | 1055.85            | 2459.17            |
| A_68_P21775423 | chr2:156960457-156960501                          | NM_001139520:480   | Samhd1     | INSIDE                 | 0.337                                                        | 1.534                          | 1491.70            | 2288.64            | 0.518                          | 1099.04            | 568.83             |
| A_68_P30393147 | chr15:84022777-84022821                           | NM_178614:136      | Samm50     | INSIDE                 | 0.542                                                        | 0.276                          | 4482.86            | 1238.45            | 0.15                           | 3083.17            | 461.38             |
| A_68_P25891489 | chr8:59966195-59966239                            | NM_021788:441      | Sap30      | INSIDE                 | 0.625                                                        | 2.791                          | 1688.06            | 4710.90            | 1.743                          | 1439.23            | 2508.71            |
| A_68_P22412729 | chr3:108247976-108248020                          | NM_001204979:179   | Sars       | INSIDE                 | 0.635                                                        | 0.265                          | 1778.91            | 471.83             | 0.169                          | 1301.67            | 219.36             |
| A_68_P23999965 | chr5:114221529-114221573                          | NM_016926:108      | Sart3      | INSIDE                 | 0.407                                                        | 6.367                          | 1214.70            | 7733.49            | 2.593                          | 1048.84            | 2719.86            |
| A_68_P26926726 | chr10:8605914-8605958                             | NM_175155:-68      | Sash1      | PROMOTER               | 0.06                                                         | 30.907                         | 2025.15            | 62591.28           | 1.85                           | 1771.27            | 3276.68            |
| A_68_P31236178 | chr17:51952223-51952267                           | NM_001163630:-865  | Satb1      | PROMOTER               | 0.121                                                        | 37.030                         | 2464.00            | 91242.21           | 4.497                          | 2287.29            | 10285.18           |
| A_68_P31236181 | chr17:51952553-51952597                           | NM_001163630:-1195 | Satb1      | PROMOTER               | 0.604                                                        | 3.846                          | 466.83             | 1795.45            | 2.325                          | 411.03             | 955.56             |
| A_68_P20250386 | chr1:57027876-57027920                            | NM_139146:280      | Satb2      | INSIDE                 | 0.529                                                        | 0.295                          | 4681.28            | 1381.97            | 0.156                          | 3361.58            | 524.98             |
| A_68_P20250374 | chr1:57026684-57026728                            | NM_139146:1472     | Satb2      | INSIDE                 | 0.476                                                        | 0.540                          | 1087.63            | 586.84             | 0.257                          | 871.60             | 224.08             |

| ProbeName      | Target position of probe on CpG island microarray | TargetID           | GeneSymbol | CpG island Description | Ratio of relative methylation (TiO <sub>2</sub> -NP/Vehicle) | Sham group                     |                    |                    | TiO <sub>2</sub> -H group      |                    |                    |
|----------------|---------------------------------------------------|--------------------|------------|------------------------|--------------------------------------------------------------|--------------------------------|--------------------|--------------------|--------------------------------|--------------------|--------------------|
|                |                                                   |                    |            |                        |                                                              | Relative methylation (Cy5/Cy3) | Cy3 signal (Input) | Cy5 signal (MeDIP) | Relative methylation (Cy5/Cy3) | Cy3 signal (Input) | Cy5 signal (MeDIP) |
| A_68_P28517710 | chr12:71088293-71088337                           | NM_022028:-325     | Sav1       | PROMOTER               | 0.432                                                        | 5.385                          | 1490.63            | 8027.44            | 2.326                          | 1417.04            | 3296.14            |
| A_68_P28517706 | chr12:71087715-71087759                           | NM_022028:253      | Sav1       | INSIDE                 | 0.662                                                        | 0.358                          | 1483.04            | 530.78             | 0.237                          | 1068.38            | 253.21             |
| A_68_P24092946 | chr5:130731035-130731079                          | NM_023248:276      | Sbds       | INSIDE                 | 0.348                                                        | 0.160                          | 5681.93            | 906.48             | 0.055                          | 4031.69            | 223.53             |
| A_68_P25499633 | chr7:133416815-133416859                          | NM_145587:704      | Sbk1       | INSIDE                 | 0.65                                                         | 0.490                          | 1172.88            | 575.25             | 0.319                          | 1006.54            | 320.79             |
| A_68_P24061239 | chr5:124875960-124876004                          | NM_001081203:-59   | Sbno1      | PROMOTER               | 0.266                                                        | 0.545                          | 3322.89            | 1812.14            | 0.145                          | 2544.78            | 368.76             |
| A_68_P24061235 | chr5:124875362-124875406                          | NM_001081203:539   | Sbno1      | INSIDE                 | 0.455                                                        | 6.532                          | 1811.23            | 11831.63           | 2.97                           | 1560.38            | 4634.48            |
| A_68_P24061238 | chr5:124875857-124875901                          | NM_001081203:45    | Sbno1      | INSIDE                 | 0.16                                                         | 2.549                          | 1258.20            | 3206.66            | 0.407                          | 985.26             | 400.90             |
| A_68_P25090599 | chr7:52262741-52262785                            | NM_001008422:8857  | Scaf1      | INSIDE                 | 0.369                                                        | 5.262                          | 2199.20            | 11573.13           | 1.941                          | 1407.76            | 2732.51            |
| A_68_P25090672 | chr7:52271527-52271571                            | NM_001008422:71    | Scaf1      | INSIDE                 | 0.471                                                        | 0.406                          | 1217.20            | 494.01             | 0.191                          | 906.17             | 173.40             |
| A_68_P25090668 | chr7:52271191-52271235                            | NM_001008422:407   | Scaf1      | INSIDE                 | 0.441                                                        | 0.637                          | 1923.56            | 1224.64            | 0.281                          | 1560.92            | 438.02             |
| A_68_P25090600 | chr7:52262845-52262889                            | NM_001008422:8753  | Scaf1      | INSIDE                 | 0.482                                                        | 3.526                          | 1568.51            | 5531.24            | 1.699                          | 1118.58            | 1900.42            |
| A_68_P30463770 | chr15:96290889-96290933                           | NM_028148:364      | Scaf11     | INSIDE                 | 0.56                                                         | 3.613                          | 1615.67            | 5837.36            | 2.024                          | 1457.51            | 2949.74            |
| A_68_P30463766 | chr15:96290439-96290483                           | NM_028148:814      | Scaf11     | INSIDE                 | 0.415                                                        | 4.095                          | 1628.56            | 6668.76            | 1.698                          | 1279.05            | 2171.51            |
| A_68_P30463773 | chr15:96291502-96291546                           | NM_028148:-250     | Scaf11     | PROMOTER               | 0.633                                                        | 2.728                          | 1397.12            | 3810.80            | 1.727                          | 1138.18            | 1965.83            |
| A_68_P21152636 | chr2:39045852-39045896                            | NM_178778:376      | Scai       | INSIDE                 | 0.174                                                        | 28.316                         | 14689.69           | 415958.70          | 4.917                          | 15309.73           | 75281.39           |
| A_68_P21152639 | chr2:39046148-39046192                            | NM_178778:80       | Scai       | INSIDE                 | 0.361                                                        | 6.847                          | 1035.03            | 7087.34            | 2.474                          | 947.97             | 2345.23            |
| A_68_P21152635 | chr2:39045739-39045783                            | NM_178778:490      | Scai       | INSIDE                 | 0.511                                                        | 0.454                          | 3393.06            | 1540.16            | 0.232                          | 2628.93            | 609.71             |
| A_68_P29233990 | chr13:95055582-95055626                           | NM_029153:-368     | Scamp1     | PROMOTER               | 0.346                                                        | 5.618                          | 3309.45            | 18592.68           | 1.946                          | 2466.64            | 4799.34            |
| A_68_P26542457 | chr9:57408653-57408697                            | NM_022813:-76      | Scamp2     | DIVERGENT_PROMOTER     | 0.423                                                        | 20.366                         | 2500.86            | 50933.05           | 8.606                          | 2434.73            | 20952.46           |
| A_68_P27284238 | chr10:80065633-80065677                           | NM_019575:28       | Scamp4     | INSIDE                 | 0.324                                                        | 6.938                          | 2006.11            | 13919.30           | 2.245                          | 1691.72            | 3798.05            |
| A_68_P27284240 | chr10:80065867-80065911                           | NM_019575:262      | Scamp4     | INSIDE                 | 0.604                                                        | 0.413                          | 1214.28            | 502.05             | 0.25                           | 911.55             | 227.71             |
| A_68_P26823386 | chr9:110283633-110283677                          | NM_001001144:47858 | Scap       | INSIDE                 | 0.442                                                        | 5.002                          | 3934.82            | 19680.33           | 2.212                          | 2835.87            | 6272.53            |
| A_68_P26533458 | chr9:55785595-55785639                            | NM_001081341:306   | Scaper     | INSIDE                 | 0.286                                                        | 4.704                          | 6442.04            | 30301.48           | 1.347                          | 5520.86            | 7439.09            |
| A_68_P24065931 | chr5:125748080-125748124                          | NM_001205082:73362 | Scarb1     | DOWNSTREAM             | 0.593                                                        | 0.693                          | 2022.80            | 1401.07            | 0.411                          | 1444.99            | 593.50             |
| A_68_P30575813 | chr16:17807076-17807120                           | NM_153790:9724     | Scarf2     | INSIDE                 | 0.592                                                        | 3.898                          | 4992.91            | 19462.69           | 2.307                          | 3820.96            | 8813.61            |
| A_68_P30575781 | chr16:17803149-17803193                           | NM_153790:5796     | Scarf2     | INSIDE                 | 0.361                                                        | 4.851                          | 1503.45            | 7292.82            | 1.751                          | 1322.66            | 2316.00            |
| A_68_P30575879 | chr16:17816053-17816097                           | NM_153790:18700    | Scarf2     | DOWNSTREAM             | 0.634                                                        | 0.587                          | 891.91             | 523.85             | 0.373                          | 796.48             | 296.69             |
| A_68_P23803939 | chr5:74927453-74927497                            | NM_001114660:300   | Scf2       | INSIDE                 | 0.552                                                        | 0.546                          | 1058.08            | 578.12             | 0.302                          | 844.52             | 254.83             |
| A_68_P22215798 | chr3:68299063-68299107                            | NR_036665:970      | Schip1     | INSIDE                 | 0.191                                                        | 19.854                         | 1849.51            | 36720.29           | 3.794                          | 1466.42            | 5563.98            |
| A_68_P28376737 | chr12:40860793-40860837                           | NM_001146196:1     | Scin       | INSIDE                 | 0.311                                                        | 31.667                         | 1583.71            | 50152.05           | 9.835                          | 1313.46            | 12917.85           |
| A_68_P28376736 | chr12:40860722-40860766                           | NM_001146196:71    | Scin       | INSIDE                 | 0.553                                                        | 0.514                          | 2437.62            | 1251.97            | 0.284                          | 1859.84            | 528.38             |
| A_68_P22086571 | chr3:41546266-41546310                            | NM_001081411:148   | Sclt1      | INSIDE                 | 0.651                                                        | 3.960                          | 470.62             | 1863.60            | 2.576                          | 412.05             | 1061.46            |
| A_68_P20441527 | chr1:93194765-93194809                            | NM_016717:-128     | Scly       | PROMOTER               | 0.611                                                        | 6.828                          | 3561.39            | 24318.47           | 4.169                          | 2840.17            | 11840.30           |
| A_68_P25035179 | chr7:31911519-31911563                            | NM_011322:424      | Sen1b      | INSIDE                 | 0.322                                                        | 0.610                          | 3044.38            | 1857.24            | 0.196                          | 2291.90            | 450.00             |
| A_68_P26471636 | chr9:44946722-44946766                            | NM_001013390:-380  | Sen4b      | DIVERGENT_PROMOTER     | 0.573                                                        | 0.674                          | 1524.09            | 1026.85            | 0.386                          | 1206.43            | 465.82             |
| A_68_P26873354 | chr9:119487614-119487658                          | NM_021544:498      | Sen5a      | INSIDE                 | 0.438                                                        | 0.447                          | 1057.80            | 473.28             | 0.196                          | 883.75             | 173.10             |
| A_68_P26873361 | chr9:119488531-119488575                          | NM_021544:-418     | Sen5a      | PROMOTER               | 0.466                                                        | 0.501                          | 1047.98            | 524.93             | 0.234                          | 854.30             | 199.54             |
| A_68_P26872698 | chr9:119394966-119395010                          | NM_021544:93146    | Sen5a      | INSIDE                 | 0.574                                                        | 3.233                          | 900.07             | 2909.77            | 1.854                          | 785.18             | 1455.93            |
| A_68_P26872699 | chr9:119395083-119395128                          | NM_021544:93029    | Sen5a      | INSIDE                 | 0.051                                                        | 31.146                         | 1336.36            | 41621.74           | 1.601                          | 939.86             | 1504.95            |
| A_68_P26873357 | chr9:119487930-119487974                          | NM_021544:182      | Sen5a      | INSIDE                 | 0.525                                                        | 1.373                          | 5392.46            | 7402.09            | 0.721                          | 3971.19            | 2862.30            |
| A_68_P30489328 | chr15:100884313-100884357                         | NM_011323:117633   | Sen8a      | DOWNSTREAM             | 0.514                                                        | 4.470                          | 1247.33            | 5575.41            | 2.296                          | 1132.87            | 2601.52            |
| A_68_P30489331 | chr15:100884729-100884773                         | NM_011323:118049   | Sen8a      | DOWNSTREAM             | 0.231                                                        | 1.592                          | 2429.59            | 3868.69            | 0.367                          | 1721.51            | 631.95             |
| A_68_P30489220 | chr15:100870918-100870964                         | NM_011323:104239   | Sen8a      | INSIDE                 | 0.133                                                        | 13.682                         | 1065.07            | 14572.30           | 1.826                          | 681.72             | 1244.61            |
| A_68_P26015153 | chr8:85966434-85966478                            | NM_019708:91       | Scoc       | INSIDE                 | 0.434                                                        | 0.561                          | 1124.21            | 630.30             | 0.243                          | 862.25             | 209.73             |
| A_68_P28003086 | chr11:88816762-88816806                           | NM_029023:-28      | Scsep1     | PROMOTER               | 0.226                                                        | 1.353                          | 1975.12            | 2672.77            | 0.306                          | 1469.37            | 450.10             |
| A_68_P30345853 | chr15:75900100-75900144                           | NM_134089:38       | Scrib      | INSIDE                 | 0.361                                                        | 13.356                         | 4297.18            | 57393.92           | 4.819                          | 3727.65            | 17964.15           |

| ProbeName      | Target position of probe on CpG island microarray | TargetID           | GeneSymbol | CpG island Description | Ratio of relative methylation (TiO <sub>2</sub> -NP/Vehicle) | Sham group                     |                    |                    | TiO <sub>2</sub> -H group      |                    |                    |
|----------------|---------------------------------------------------|--------------------|------------|------------------------|--------------------------------------------------------------|--------------------------------|--------------------|--------------------|--------------------------------|--------------------|--------------------|
|                |                                                   |                    |            |                        |                                                              | Relative methylation (Cy5/Cy3) | Cy3 signal (Input) | Cy5 signal (MeDIP) | Relative methylation (Cy5/Cy3) | Cy3 signal (Input) | Cy5 signal (MeDIP) |
| A_68_P24464123 | chr6:54516358-54516402                            | NM_027268:-4       | Scrn1      | PROMOTER               | 0.563                                                        | 2.581                          | 1684.14            | 4347.55            | 1.452                          | 1424.54            | 2068.80            |
| A_68_P30348909 | chr15:76354254-76354298                           | NM_130893:-1717    | Sert1      | PROMOTER               | 0.254                                                        | 8.486                          | 910.26             | 7724.37            | 2.152                          | 716.37             | 1541.71            |
| A_68_P30348857 | chr15:76348429-76348487                           | NM_130893:4101     | Sert1      | INSIDE                 | 0.293                                                        | 0.449                          | 2097.85            | 941.41             | 0.131                          | 1329.20            | 174.48             |
| A_68_P30348853 | chr15:76348038-76348082                           | NM_130893:4499     | Sert1      | INSIDE                 | 0.593                                                        | 0.449                          | 1563.83            | 702.50             | 0.266                          | 1221.92            | 325.52             |
| A_68_P21747518 | chr2:151908021-151908065                          | NM_001160410:778   | Sert2      | INSIDE                 | 0.208                                                        | 21.962                         | 5536.29            | 121590.10          | 4.568                          | 5287.55            | 24154.67           |
| A_68_P21747609 | chr2:151919690-151919734                          | NM_001160410:12448 | Sert2      | INSIDE                 | 0.448                                                        | 12.565                         | 1162.98            | 14613.23           | 5.631                          | 787.97             | 4436.92            |
| A_68_P21747605 | chr2:151919256-151919300                          | NM_001160410:12014 | Sert2      | INSIDE                 | 0.569                                                        | 3.117                          | 1608.91            | 5014.20            | 1.772                          | 1389.89            | 2463.10            |
| A_68_P21747603 | chr2:151918965-151919009                          | NM_001160410:11722 | Sert2      | INSIDE                 | 0.578                                                        | 3.163                          | 920.63             | 2912.03            | 1.828                          | 692.48             | 1265.56            |
| A_68_P21747621 | chr2:151920967-151921011                          | NM_001160410:13724 | Sert2      | INSIDE                 | 0.364                                                        | 1.686                          | 1745.11            | 2942.59            | 0.614                          | 1362.72            | 836.82             |
| A_68_P30390278 | chr15:83555204-83555248                           | NM_022723:225      | Scube1     | INSIDE                 | 0.285                                                        | 13.489                         | 2075.41            | 27994.71           | 3.844                          | 1790.71            | 6883.39            |
| A_68_P30390280 | chr15:83555410-83555454                           | NM_022723:19       | Scube1     | INSIDE                 | 0.526                                                        | 4.330                          | 822.95             | 3563.69            | 2.276                          | 735.27             | 1673.79            |
| A_68_P30390276 | chr15:83554904-83554948                           | NM_022723:525      | Scube1     | INSIDE                 | 0.611                                                        | 0.524                          | 1253.23            | 656.66             | 0.32                           | 986.81             | 315.82             |
| A_68_P30390277 | chr15:83555041-83555085                           | NM_022723:389      | Scube1     | INSIDE                 | 0.326                                                        | 5.324                          | 1704.57            | 9075.48            | 1.736                          | 1345.64            | 2336.56            |
| A_68_P31120665 | chr17:28278842-28278886                           | NM_001004366:-606  | Scube3     | PROMOTER               | 0.397                                                        | 7.659                          | 1487.84            | 11394.73           | 3.043                          | 1113.05            | 3386.68            |
| A_68_P28224331 | chr12:8779590-8779634                             | NM_011519:1411     | Sdc1       | INSIDE                 | 0.643                                                        | 0.338                          | 3446.53            | 1166.25            | 0.218                          | 2546.27            | 553.94             |
| A_68_P28224314 | chr12:8777965-8778009                             | NM_011519:-215     | Sdc1       | PROMOTER               | 0.648                                                        | 0.321                          | 2549.24            | 817.65             | 0.208                          | 1886.28            | 392.34             |
| A_68_P28224332 | chr12:8779734-8779778                             | NM_011519:1555     | Sdc1       | INSIDE                 | 0.523                                                        | 0.678                          | 1060.90            | 719.47             | 0.355                          | 798.88             | 283.39             |
| A_68_P22705223 | chr4:6292852-6292896                              | NM_001098227:48    | Sdcbp      | INSIDE                 | 0.622                                                        | 4.126                          | 4357.31            | 17976.09           | 2.564                          | 3521.59            | 9029.89            |
| A_68_P30572147 | chr16:17132218-17132262                           | NM_022324:236      | Sdf2l1     | INSIDE                 | 0.236                                                        | 0.255                          | 4322.78            | 1101.57            | 0.06                           | 2781.54            | 166.93             |
| A_68_P30572142 | chr16:17131635-17131679                           | NM_022324:820      | Sdf2l1     | INSIDE                 | 0.431                                                        | 4.518                          | 2159.02            | 9754.10            | 1.948                          | 1747.09            | 3403.15            |
| A_68_P30572146 | chr16:17132077-17132121                           | NM_022324:378      | Sdf2l1     | INSIDE                 | 0.515                                                        | 0.551                          | 1613.72            | 889.50             | 0.284                          | 1245.03            | 353.48             |
| A_68_P30572145 | chr16:17131918-17131970                           | NM_022324:532      | Sdf2l1     | INSIDE                 | 0.501                                                        | 0.686                          | 1190.30            | 816.77             | 0.344                          | 865.91             | 297.79             |
| A_68_P30572148 | chr16:17132335-17132379                           | NM_022324:120      | Sdf2l1     | INSIDE                 | 0.296                                                        | 4.912                          | 10225.57           | 50227.23           | 1.452                          | 8694.48            | 12625.17           |
| A_68_P23441760 | chr4:155367175-155367219                          | NM_011341:174      | Sdf4       | INSIDE                 | 0.661                                                        | 0.155                          | 3357.46            | 519.15             | 0.102                          | 2443.54            | 249.87             |
| A_68_P29145778 | chr13:74487536-74487580                           | NM_023281:130      | Sdha       | INSIDE                 | 0.487                                                        | 0.319                          | 1500.22            | 479.11             | 0.155                          | 1130.10            | 175.67             |
| A_68_P28163122 | chr11:116976258-116976302                         | NR_029459:-205     | Sec14l1    | PROMOTER               | 0.439                                                        | 0.178                          | 2815.12            | 501.45             | 0.078                          | 2186.67            | 171.08             |
| A_68_P21078768 | chr2:26301082-26301126                            | NM_153125:-368     | Sec16a     | PROMOTER               | 0.225                                                        | 20.041                         | 8245.31            | 165243.40          | 4.505                          | 7995.13            | 36017.64           |
| A_68_P21078766 | chr2:26300840-26300884                            | NM_153125:-126     | Sec16a     | PROMOTER               | 0.394                                                        | 0.673                          | 2954.36            | 1987.24            | 0.265                          | 2275.49            | 603.46             |
| A_68_P21078762 | chr2:26300450-26300494                            | NM_153125:264      | Sec16a     | INSIDE                 | 0.488                                                        | 0.482                          | 1032.41            | 497.33             | 0.235                          | 739.01             | 173.67             |
| A_68_P21078770 | chr2:26301305-26301349                            | NM_153125:-590     | Sec16a     | PROMOTER               | 0.238                                                        | 8.103                          | 742.65             | 6017.72            | 1.93                           | 635.99             | 1227.49            |
| A_68_P30669634 | chr16:35363730-35363774                           | NM_133704:252      | Sec22a     | INSIDE                 | 0.385                                                        | 6.448                          | 1680.87            | 10837.47           | 2.482                          | 1453.31            | 3606.69            |
| A_68_P30669636 | chr16:35364019-35364063                           | NM_133704:-36      | Sec22a     | PROMOTER               | 0.433                                                        | 0.389                          | 1197.07            | 466.22             | 0.169                          | 1004.19            | 169.40             |
| A_68_P26885027 | chr9:121614483-121614527                          | NM_001164562:-357  | Sec22c     | DIVERGENT_PROMOTER     | 0.467                                                        | 0.529                          | 935.79             | 494.67             | 0.247                          | 710.71             | 175.59             |
| A_68_P28469855 | chr12:60112957-60113001                           | NM_009147:26       | Sec23a     | INSIDE                 | 0.532                                                        | 4.176                          | 785.48             | 3280.01            | 2.223                          | 882.81             | 1962.18            |
| A_68_P29448259 | chr14:21493732-21493776                           | NM_001168273:212   | Sec24c     | INSIDE                 | 0.597                                                        | 0.315                          | 2794.17            | 881.20             | 0.188                          | 2128.45            | 400.71             |
| A_68_P27611243 | chr11:16407800-16407844                           | NM_001109971:665   | Sec61g     | INSIDE                 | 0.51                                                         | 0.501                          | 1530.09            | 766.02             | 0.256                          | 1291.52            | 330.04             |
| A_68_P22030179 | chr3:30692442-30692486                            | NM_027016:667      | Sec62      | INSIDE                 | 0.469                                                        | 0.233                          | 2861.68            | 668.12             | 0.11                           | 2311.37            | 253.13             |
| A_68_P27096532 | chr10:42482055-42482099                           | NM_153055:775      | Sec63      | INSIDE                 | 0.054                                                        | 2.663                          | 9901.14            | 26371.04           | 0.145                          | 6332.66            | 916.70             |
| A_68_P27096531 | chr10:42481959-42482003                           | NM_153055:679      | Sec63      | INSIDE                 | 0.275                                                        | 2.170                          | 2606.39            | 5656.42            | 0.597                          | 1535.20            | 916.93             |
| A_68_P29033511 | chr13:51746883-51746927                           | NM_029279:-178     | Secisbp2   | PROMOTER               | 0.432                                                        | 4.729                          | 3348.80            | 15837.10           | 2.043                          | 2633.05            | 5380.04            |
| A_68_P23699207 | chr5:53604122-53604166                            | NM_172710:547      | Sell13     | INSIDE                 | 0.48                                                         | 0.283                          | 1754.23            | 496.43             | 0.136                          | 1298.38            | 176.36             |
| A_68_P27552432 | chr11:3417267-3417311                             | NM_053267:2584     | Selm       | INSIDE                 | 0.396                                                        | 6.685                          | 679.35             | 4541.59            | 2.649                          | 590.05             | 1562.97            |
| A_68_P26809841 | chr9:107501260-107501304                          | NM_009153:6451     | Sema3b     | INSIDE                 | 0.335                                                        | 4.633                          | 1352.97            | 6268.20            | 1.554                          | 879.63             | 1367.02            |
| A_68_P23491409 | chr5:14025282-14025326                            | NM_011348:29       | Sema3e     | INSIDE                 | 0.146                                                        | 10.068                         | 2540.45            | 25576.63           | 1.466                          | 2012.11            | 2950.24            |
| A_68_P25265269 | chr7:87343641-87343685                            | NM_013659:11936    | Sema4b     | INSIDE                 | 0.564                                                        | 2.895                          | 2542.83            | 7360.25            | 1.633                          | 2022.68            | 3302.93            |
| A_68_P20149051 | chr1:36614518-36614562                            | NM_001126047:686   | Sema4c     | INSIDE                 | 0.366                                                        | 0.479                          | 1438.95            | 689.70             | 0.175                          | 1110.06            | 194.80             |

| ProbeName      | Target position of probe on CpG island microarray | TargetID           | GeneSymbol | CpG island Description | Ratio of relative methylation (TiO <sub>2</sub> -NP/Vehicle) | Sham group                     |                    |                    | TiO <sub>2</sub> -H group      |                    |                    |
|----------------|---------------------------------------------------|--------------------|------------|------------------------|--------------------------------------------------------------|--------------------------------|--------------------|--------------------|--------------------------------|--------------------|--------------------|
|                |                                                   |                    |            |                        |                                                              | Relative methylation (Cy5/Cy3) | Cy3 signal (Input) | Cy5 signal (MeDIP) | Relative methylation (Cy5/Cy3) | Cy3 signal (Input) | Cy5 signal (MeDIP) |
| A_68_P20149055 | chr1:36615091-36615135                            | NM_001126047:114   | Sema4c     | INSIDE                 | 0.414                                                        | 6.213                          | 1341.44            | 8335.01            | 2.572                          | 1098.81            | 2825.84            |
| A_68_P20149047 | chr1:36614040-36614084                            | NM_001126047:1164  | Sema4c     | INSIDE                 | 0.467                                                        | 0.698                          | 1022.22            | 713.22             | 0.326                          | 784.75             | 255.83             |
| A_68_P24590571 | chr6:82889627-82889671                            | NM_011350:96       | Sema4f     | INSIDE                 | 0.365                                                        | 10.139                         | 1543.55            | 15650.78           | 3.698                          | 1375.80            | 5088.03            |
| A_68_P32135694 | chr19:45063945-45063989                           | NM_011976:133      | Sema4g     | INSIDE                 | 0.138                                                        | 18.588                         | 1178.76            | 21910.65           | 2.573                          | 834.88             | 2148.04            |
| A_68_P32135692 | chr19:45063608-45063652                           | NM_011976:-203     | Sema4g     | PROMOTER               | 0.581                                                        | 0.365                          | 3922.89            | 1432.24            | 0.212                          | 2719.81            | 577.18             |
| A_68_P30670707 | chr16:35542109-35542153                           | NM_013661:683      | Sema5b     | INSIDE                 | 0.136                                                        | 0.515                          | 6535.40            | 3367.83            | 0.07                           | 4524.58            | 317.55             |
| A_68_P30670710 | chr16:35542481-35542525                           | NM_013661:1055     | Sema5b     | INSIDE                 | 0.484                                                        | 0.496                          | 1190.61            | 590.54             | 0.24                           | 977.90             | 234.98             |
| A_68_P31682229 | chr18:47526349-47526393                           | NM_018744:2152     | Sema6a     | INSIDE                 | 0.532                                                        | 0.655                          | 1774.42            | 1163.13            | 0.349                          | 1435.14            | 500.24             |
| A_68_P31254209 | chr17:56288172-56288216                           | NM_001130456:-8428 | Sema6b     | PROMOTER               | 0.264                                                        | 0.219                          | 4161.65            | 913.20             | 0.058                          | 2970.56            | 171.88             |
| A_68_P31254208 | chr17:56288089-56288133                           | NM_001130456:-8344 | Sema6b     | PROMOTER               | 0.269                                                        | 1.753                          | 6190.51            | 10852.68           | 0.472                          | 3905.85            | 1843.60            |
| A_68_P31254018 | chr17:56263505-56263549                           | NM_013662:9749     | Sema6b     | INSIDE                 | 0.457                                                        | 6.582                          | 2669.68            | 17570.65           | 3.011                          | 2173.74            | 6544.45            |
| A_68_P31254024 | chr17:56264131-56264175                           | NM_013662:9123     | Sema6b     | INSIDE                 | 0.564                                                        | 3.770                          | 2677.39            | 10092.73           | 2.126                          | 2135.22            | 4539.08            |
| A_68_P31254020 | chr17:56263726-56263770                           | NM_013662:9527     | Sema6b     | INSIDE                 | 0.595                                                        | 7.975                          | 3837.91            | 30607.46           | 4.743                          | 3089.12            | 14652.10           |
| A_68_P31254210 | chr17:56288310-56288354                           | NM_001130456:-8566 | Sema6b     | PROMOTER               | 0.197                                                        | 2.125                          | 1680.54            | 3570.47            | 0.418                          | 1244.87            | 520.18             |
| A_68_P22342541 | chr3:94965423-94965467                            | NM_011351:-2851    | Sema6c     | PROMOTER               | 0.185                                                        | 11.963                         | 1753.45            | 20975.77           | 2.21                           | 1499.13            | 3313.31            |
| A_68_P22342633 | chr3:94977194-94977238                            | NM_011351:8921     | Sema6c     | INSIDE                 | 0.466                                                        | 4.925                          | 1927.06            | 9491.62            | 2.294                          | 1705.08            | 3912.06            |
| A_68_P22342539 | chr3:94965148-94965192                            | NM_011351:-3125    | Sema6c     | PROMOTER               | 0.626                                                        | 0.440                          | 2816.48            | 1239.50            | 0.275                          | 2059.45            | 567.24             |
| A_68_P30595531 | chr16:22009697-22009741                           | NM_029457:162      | Senp2      | INSIDE                 | 0.149                                                        | 0.532                          | 4186.72            | 2228.25            | 0.079                          | 2397.66            | 190.21             |
| A_68_P30779064 | chr16:56075886-56075930                           | NM_001003972:387   | Senp7      | INSIDE                 | 0.373                                                        | 13.475                         | 2124.98            | 28634.42           | 5.029                          | 2047.57            | 10297.22           |
| A_68_P26555222 | chr9:59598670-59598714                            | NM_001172068:-236  | Senp8      | DIVERGENT_PROMOTER     | 0.428                                                        | 6.875                          | 1681.01            | 11556.61           | 2.942                          | 1406.47            | 4138.16            |
| A_68_P25504895 | chr7:134417127-134417171                          | NM_009266:425      | Seps2      | INSIDE                 | 0.315                                                        | 6.346                          | 1478.26            | 9381.36            | 2.002                          | 1457.50            | 2918.21            |
| A_68_P27167594 | chr10:58684574-58684618                           | NM_001024910:-1    | Septin10   | DIVERGENT_PROMOTER     | 0.435                                                        | 13.067                         | 4317.45            | 56416.18           | 5.685                          | 3863.85            | 21966.69           |
| A_68_P27167591 | chr10:58684147-58684191                           | NM_001024910:427   | Septin10   | INSIDE                 | 0.504                                                        | 0.249                          | 2008.68            | 499.40             | 0.125                          | 1369.75            | 171.55             |
| A_68_P27167593 | chr10:58684415-58684459                           | NM_001024910:159   | Septin10   | INSIDE                 | 0.645                                                        | 3.677                          | 587.10             | 2158.75            | 2.371                          | 411.95             | 976.58             |
| A_68_P23897742 | chr5:93522042-93522086                            | NM_001009818:-418  | Septin11   | PROMOTER               | 0.495                                                        | 0.671                          | 1656.00            | 1110.92            | 0.332                          | 1335.10            | 442.91             |
| A_68_P23897752 | chr5:93523254-93523298                            | NM_001009818:794   | Septin11   | INSIDE                 | 0.469                                                        | 0.603                          | 767.13             | 462.61             | 0.283                          | 655.77             | 185.57             |
| A_68_P27994864 | chr11:87392137-87392181                           | NM_011129:-2474    | Septin4    | PROMOTER               | 0.643                                                        | 0.723                          | 1534.82            | 1109.96            | 0.465                          | 1265.72            | 588.28             |
| A_68_P26365997 | chr9:25060616-25060660                            | NM_001205367:599   | Septin7    | INSIDE                 | 0.329                                                        | 6.278                          | 2054.76            | 12898.97           | 2.068                          | 1703.00            | 3521.15            |
| A_68_P26365989 | chr9:25059719-25059763                            | NM_001205367:-299  | Septin7    | PROMOTER               | 0.592                                                        | 6.017                          | 4214.92            | 25359.73           | 3.56                           | 3400.39            | 12106.25           |
| A_68_P28164254 | chr11:117151837-117151881                         | NM_00113487:24299  | Septin9    | INSIDE                 | 0.263                                                        | 15.463                         | 3624.64            | 56046.70           | 4.066                          | 3858.10            | 15686.75           |
| A_68_P28163660 | chr11:117060956-117061000                         | NM_00113486:4      | Septin9    | INSIDE                 | 0.409                                                        | 7.035                          | 1843.89            | 12971.58           | 2.875                          | 1521.64            | 4375.22            |
| A_68_P31020947 | chr17:6079672-6079716                             | NM_001111017:45    | Serac1     | INSIDE                 | 0.479                                                        | 5.172                          | 2613.79            | 13518.49           | 2.476                          | 2219.69            | 5495.05            |
| A_68_P24520694 | chr6:67217359-67217403                            | NM_00113564:408    | Serbp1     | INSIDE                 | 0.645                                                        | 3.310                          | 612.14             | 2026.20            | 2.135                          | 561.04             | 1197.95            |
| A_68_P21580978 | chr2:121275537-121275581                          | NM_011354:595      | Serf2      | INSIDE                 | 0.275                                                        | 7.980                          | 3373.92            | 26923.05           | 2.192                          | 2886.88            | 6328.70            |
| A_68_P21580976 | chr2:121275325-121275369                          | NM_011354:383      | Serf2      | INSIDE                 | 0.643                                                        | 4.699                          | 1353.46            | 6359.38            | 3.022                          | 1157.58            | 3498.15            |
| A_68_P28936013 | chr13:34094245-34094289                           | NR_028309:352      | Serpinb6a  | INSIDE                 | 0.601                                                        | 3.232                          | 1357.63            | 4387.50            | 1.943                          | 1111.67            | 2159.99            |
| A_68_P25017511 | chr7:28271855-28271899                            | NM_018820:-95      | Sertad1    | PROMOTER               | 0.475                                                        | 6.413                          | 3626.00            | 23254.60           | 3.049                          | 2819.18            | 8594.37            |
| A_68_P27632486 | chr11:20531998-20532042                           | NM_001038625:41    | Sertad2    | INSIDE                 | 0.311                                                        | 0.520                          | 1333.81            | 693.09             | 0.162                          | 1070.91            | 173.23             |
| A_68_P27631990 | chr11:20443463-20443507                           | NM_021372:229      | Sertad2    | INSIDE                 | 0.528                                                        | 0.592                          | 2126.85            | 1258.60            | 0.312                          | 1637.20            | 511.22             |
| A_68_P27631993 | chr11:20443834-20443878                           | NM_021372:601      | Sertad2    | INSIDE                 | 0.553                                                        | 16.862                         | 4797.16            | 80888.09           | 9.332                          | 10810.09           | 100882.60          |
| A_68_P27632484 | chr11:20531833-20531877                           | NM_001038625:-125  | Sertad2    | PROMOTER               | 0.605                                                        | 5.213                          | 5956.20            | 31047.82           | 3.154                          | 4585.13            | 14460.13           |
| A_68_P27631991 | chr11:20443663-20443707                           | NM_021372:429      | Sertad2    | INSIDE                 | 0.62                                                         | 3.967                          | 1030.68            | 4089.01            | 2.458                          | 875.72             | 2152.93            |
| A_68_P27632488 | chr11:20532242-20532286                           | NM_001038625:285   | Sertad2    | INSIDE                 | 0.545                                                        | 0.562                          | 1036.84            | 582.35             | 0.306                          | 880.08             | 269.26             |
| A_68_P27631992 | chr11:20443745-20443789                           | NM_021372:511      | Sertad2    | INSIDE                 | 0.648                                                        | 0.676                          | 995.72             | 672.69             | 0.438                          | 757.99             | 331.66             |
| A_68_P25017446 | chr7:28258643-28258687                            | NM_133210:-194     | Sertad3    | PROMOTER               | 0.5                                                          | 0.273                          | 2182.54            | 594.87             | 0.136                          | 1616.26            | 220.30             |
| A_68_P20945779 | chr1:194661281-194661325                          | NM_001177794:16639 | Sertad4    | DOWNSTREAM             | 0.449                                                        | 0.525                          | 1801.81            | 946.80             | 0.236                          | 1036.70            | 244.65             |

| ProbeName      | Target position of probe on CpG island microarray | TargetID           | GeneSymbol | CpG island Description | Ratio of relative methylation (TiO <sub>2</sub> -NP/Vehicle) | Sham group                     |                    |                    | TiO <sub>2</sub> -H group      |                    |                    |
|----------------|---------------------------------------------------|--------------------|------------|------------------------|--------------------------------------------------------------|--------------------------------|--------------------|--------------------|--------------------------------|--------------------|--------------------|
|                |                                                   |                    |            |                        |                                                              | Relative methylation (Cy5/Cy3) | Cy3 signal (Input) | Cy5 signal (MeDIP) | Relative methylation (Cy5/Cy3) | Cy3 signal (Input) | Cy5 signal (MeDIP) |
| A_68_P20945912 | chr1:194681174-194681218                          | NM_001177794:-3255 | Sertad4    | PROMOTER               | 0.564                                                        | 5.529                          | 555.36             | 3070.73            | 3.117                          | 587.87             | 1832.48            |
| A_68_P27091644 | chr10:41607176-41607220                           | NM_001013370:-46   | Sesn1      | PROMOTER               | 0.2                                                          | 30.415                         | 2642.04            | 80357.11           | 6.098                          | 2450.35            | 14941.85           |
| A_68_P27091229 | chr10:41530226-41530270                           | NM_001162908:-131  | Sesn1      | DIVERGENT_PROMOTER     | 0.377                                                        | 13.232                         | 3212.91            | 42512.76           | 4.983                          | 2825.88            | 14080.45           |
| A_68_P27091227 | chr10:41530014-41530058                           | NM_001162908:-343  | Sesn1      | DIVERGENT_PROMOTER     | 0.651                                                        | 0.503                          | 1239.08            | 623.18             | 0.327                          | 925.01             | 302.89             |
| A_68_P21101134 | chr2:29922658-29922702                            | NM_001204875:687   | Set        | INSIDE                 | 0.333                                                        | 0.709                          | 1763.03            | 1250.49            | 0.236                          | 1454.45            | 343.75             |
| A_68_P21101133 | chr2:29922340-29922384                            | NM_001204875:369   | Set        | INSIDE                 | 0.567                                                        | 0.683                          | 966.14             | 659.94             | 0.387                          | 776.54             | 300.71             |
| A_68_P31857881 | chr18:79305640-79305684                           | NM_053099:468      | Setbp1     | INSIDE                 | 0.65                                                         | 0.451                          | 5517.63            | 2487.88            | 0.293                          | 3734.81            | 1093.80            |
| A_68_P25507242 | chr7:134920047-134920091                          | NM_178029:-834     | Setd1a     | PROMOTER               | 0.226                                                        | 19.436                         | 493.61             | 9593.67            | 4.385                          | 414.23             | 1816.36            |
| A_68_P25507247 | chr7:134920536-134920580                          | NM_178029:-344     | Setd1a     | PROMOTER               | 0.599                                                        | 0.148                          | 3606.11            | 532.60             | 0.089                          | 2611.17            | 231.20             |
| A_68_P26824202 | chr9:110434375-110434420                          | NM_001081340:-703  | Setd2      | PROMOTER               | 0.516                                                        | 4.760                          | 294.29             | 1400.70            | 2.458                          | 305.21             | 750.17             |
| A_68_P28726321 | chr12:109416856-109416900                         | NM_028262:616      | Setd3      | INSIDE                 | 0.252                                                        | 10.574                         | 1245.92            | 13174.61           | 2.659                          | 1002.01            | 2664.78            |
| A_68_P28726325 | chr12:109417342-109417386                         | NM_028262:130      | Setd3      | INSIDE                 | 0.406                                                        | 8.599                          | 1175.09            | 10105.07           | 3.492                          | 1189.12            | 4152.12            |
| A_68_P28726327 | chr12:109417619-109417664                         | NM_028262:-147     | Setd3      | DIVERGENT_PROMOTER     | 0.52                                                         | 8.841                          | 1960.12            | 17329.44           | 4.601                          | 1548.66            | 7126.06            |
| A_68_P28726319 | chr12:109416700-109416744                         | NM_028262:772      | Setd3      | INSIDE                 | 0.609                                                        | 8.701                          | 892.91             | 7768.85            | 5.299                          | 712.29             | 3774.26            |
| A_68_P30976720 | chr16:93603886-93603930                           | NM_145482:152      | Setd4      | INSIDE                 | 0.21                                                         | 16.338                         | 4238.43            | 69249.46           | 3.431                          | 3898.83            | 13375.52           |
| A_68_P24757359 | chr6:113027455-113027499                          | NM_028385:-156     | Setd5      | DIVERGENT_PROMOTER     | 0.564                                                        | 5.716                          | 2786.01            | 15924.61           | 3.225                          | 2410.92            | 7776.20            |
| A_68_P26084861 | chr8:98239992-98240036                            | NM_001035123:202   | Setd6      | INSIDE                 | 0.253                                                        | 7.049                          | 3379.22            | 23821.73           | 1.786                          | 2810.53            | 5018.48            |
| A_68_P22130348 | chr3:51364282-51364326                            | NM_080793:441      | Setd7      | INSIDE                 | 0.285                                                        | 15.363                         | 2357.60            | 36219.01           | 4.374                          | 2346.63            | 10263.83           |
| A_68_P22130354 | chr3:51364924-51364968                            | NM_080793:-201     | Setd7      | PROMOTER               | 0.49                                                         | 0.578                          | 792.60             | 458.17             | 0.283                          | 726.00             | 205.60             |
| A_68_P24061285 | chr5:124889815-124889859                          | NM_030241:-102     | Setd8      | PROMOTER               | 0.111                                                        | 59.861                         | 859.03             | 51422.41           | 6.661                          | 600.93             | 4003.06            |
| A_68_P22343684 | chr3:95161081-95161125                            | NM_001163641:22    | Setdb1     | INSIDE                 | 0.615                                                        | 2.674                          | 1231.55            | 3293.21            | 1.644                          | 946.69             | 1556.43            |
| A_68_P21095252 | chr2:28980951-28980995                            | NM_198033:461      | Setx       | INSIDE                 | 0.345                                                        | 5.843                          | 2493.43            | 14569.91           | 2.015                          | 2406.84            | 4849.73            |
| A_68_P21095250 | chr2:28980805-28980849                            | NM_198033:315      | Setx       | INSIDE                 | 0.128                                                        | 12.604                         | 1437.09            | 18112.98           | 1.61                           | 1340.66            | 2158.30            |
| A_68_P23993057 | chr5:113006567-113006611                          | NM_019982:-383     | Sez6l      | PROMOTER               | 0.531                                                        | 0.497                          | 1047.96            | 520.79             | 0.264                          | 693.28             | 182.92             |
| A_68_P31934224 | chr19:6364358-6364402                             | NM_001110791:691   | Sf1        | INSIDE                 | 0.357                                                        | 44.030                         | 1416.05            | 62348.05           | 15.736                         | 1278.26            | 20115.07           |
| A_68_P27556014 | chr11:4060531-4060575                             | NM_026175:196      | Sf3a1      | INSIDE                 | 0.427                                                        | 3.449                          | 2797.13            | 9646.12            | 1.474                          | 2096.81            | 3090.03            |
| A_68_P23269838 | chr4:124386319-124386363                          | NM_029157:-5764    | Sf3a3      | PROMOTER               | 0.596                                                        | 2.889                          | 1068.46            | 3086.42            | 1.722                          | 862.82             | 1485.84            |
| A_68_P31927885 | chr19:5295364-5295408                             | NM_030109:69       | Sf3b2      | INSIDE                 | 0.646                                                        | 2.931                          | 901.21             | 2641.50            | 1.893                          | 655.96             | 1241.73            |
| A_68_P22347940 | chr3:95976314-95976359                            | NM_153053:-136     | Sf3b4      | PROMOTER               | 0.358                                                        | 0.580                          | 1181.55            | 685.50             | 0.207                          | 950.02             | 197.08             |
| A_68_P22347939 | chr3:95976249-95976293                            | NM_153053:-202     | Sf3b4      | PROMOTER               | 0.445                                                        | 0.633                          | 1249.94            | 790.95             | 0.281                          | 956.12             | 268.96             |
| A_68_P26948616 | chr10:12728440-12728484                           | NM_175102:207      | Sf3b5      | INSIDE                 | 0.289                                                        | 0.333                          | 2534.71            | 844.38             | 0.096                          | 1788.72            | 172.04             |
| A_68_P29507580 | chr14:31529106-31529150                           | NM_001166532:328   | Sfmbt1     | INSIDE                 | 0.413                                                        | 9.873                          | 1094.16            | 10802.99           | 4.077                          | 925.62             | 3773.93            |
| A_68_P29507582 | chr14:31529438-31529482                           | NM_001166532:660   | Sfmbt1     | INSIDE                 | 0.552                                                        | 2.969                          | 2544.96            | 7556.09            | 1.639                          | 2204.48            | 3614.20            |
| A_68_P21000515 | chr2:10296432-10296476                            | NM_001198809:2392  | Sfmbt2     | INSIDE                 | 0.514                                                        | 0.413                          | 1281.14            | 529.68             | 0.213                          | 1127.09            | 239.74             |
| A_68_P21000493 | chr2:10294275-10294319                            | NM_001198809:234   | Sfmbt2     | INSIDE                 | 0.362                                                        | 3.939                          | 1570.79            | 6186.73            | 1.427                          | 1379.69            | 1969.01            |
| A_68_P23318415 | chr4:133155946-133155990                          | NM_018754:2115     | Sfn        | DOWNSTREAM             | 0.418                                                        | 5.386                          | 2660.32            | 14328.67           | 2.249                          | 2093.60            | 4708.21            |
| A_68_P23318413 | chr4:133155649-133155693                          | NM_018754:2413     | Sfn        | DOWNSTREAM             | 0.414                                                        | 3.647                          | 1311.73            | 4784.25            | 1.51                           | 1007.83            | 1521.82            |
| A_68_P23283136 | chr4:126699461-126699505                          | NM_023603:938      | Sfpq       | INSIDE                 | 0.055                                                        | 2.786                          | 1345.22            | 3747.53            | 0.153                          | 1100.24            | 168.04             |
| A_68_P23283133 | chr4:126698748-126698792                          | NM_023603:226      | Sfpq       | INSIDE                 | 0.511                                                        | 5.996                          | 1835.88            | 11008.32           | 3.066                          | 1541.13            | 4724.61            |
| A_68_P23283135 | chr4:126699373-126699417                          | NM_023603:850      | Sfpq       | INSIDE                 | 0.629                                                        | 10.723                         | 6779.66            | 72700.71           | 6.747                          | 4945.00            | 33364.39           |
| A_68_P25716360 | chr8:24521956-24522000                            | NM_013834:5        | Sfrp1      | INSIDE                 | 0.424                                                        | 22.978                         | 1992.42            | 45780.78           | 9.737                          | 2013.55            | 19606.23           |
| A_68_P22286847 | chr3:83570542-83570586                            | NM_009144:322      | Sfrp2      | INSIDE                 | 0.53                                                         | 0.389                          | 1508.89            | 587.27             | 0.206                          | 1042.36            | 215.10             |
| A_68_P22286851 | chr3:83570878-83570922                            | NM_009144:658      | Sfrp2      | INSIDE                 | 0.617                                                        | 0.366                          | 1328.72            | 485.86             | 0.225                          | 1055.29            | 237.95             |
| A_68_P32119644 | chr19:42276497-42276541                           | NM_018780:224      | Sfrp5      | INSIDE                 | 0.65                                                         | 2.689                          | 1919.50            | 5162.35            | 1.748                          | 1653.86            | 2891.29            |
| A_68_P32119640 | chr19:42276046-42276090                           | NM_018780:674      | Sfrp5      | INSIDE                 | 0.248                                                        | 0.710                          | 1095.15            | 777.46             | 0.176                          | 992.07             | 174.76             |
| A_68_P20793343 | chr1:167124694-167124739                          | NM_145512:-152     | Sft2d2     | PROMOTER               | 0.547                                                        | 3.824                          | 975.07             | 3729.10            | 2.094                          | 811.01             | 1698.00            |

| ProbeName      | Target position of probe on CpG island microarray | TargetID            | GeneSymbol | CpG island Description | Ratio of relative methylation (TiO <sub>2</sub> -NP/Vehicle) | Sham group                     |                    |                    | TiO <sub>2</sub> -H group      |                    |                    |
|----------------|---------------------------------------------------|---------------------|------------|------------------------|--------------------------------------------------------------|--------------------------------|--------------------|--------------------|--------------------------------|--------------------|--------------------|
|                |                                                   |                     |            |                        |                                                              | Relative methylation (Cy5/Cy3) | Cy3 signal (Input) | Cy5 signal (MeDIP) | Relative methylation (Cy5/Cy3) | Cy3 signal (Input) | Cy5 signal (MeDIP) |
| A_68_P31600224 | chr18:32070540-32070584                           | NM_026006:995       | Sft2d3     | INSIDE                 | 0.495                                                        | 11.043                         | 2686.51            | 29666.39           | 5.463                          | 2166.95            | 11837.24           |
| A_68_P29047306 | chr13:54167631-54167675                           | NM_027324:439       | Sfxn1      | INSIDE                 | 0.613                                                        | 0.321                          | 1832.84            | 589.06             | 0.197                          | 1499.66            | 295.42             |
| A_68_P32136240 | chr19:45139857-45139901                           | NM_001178012:17813  | Sfxn3      | DOWNSTREAM             | 0.326                                                        | 5.682                          | 1740.28            | 9888.72            | 1.855                          | 1607.12            | 2980.42            |
| A_68_P24604451 | chr6:85283005-85283049                            | NM_178639:390       | Sfxn5      | INSIDE                 | 0.363                                                        | 1.686                          | 1658.97            | 2797.55            | 0.611                          | 1185.99            | 725.21             |
| A_68_P25797392 | chr8:39723329-39723373                            | NM_145841:1212      | Sgez       | INSIDE                 | 0.441                                                        | 73.024                         | 1406.20            | 102686.50          | 32.184                         | 2001.79            | 64424.65           |
| A_68_P26996379 | chr10:21714219-21714263                           | NM_011361:-231      | Sgk1       | PROMOTER               | 0.336                                                        | 1.499                          | 2001.99            | 3001.10            | 0.503                          | 1708.17            | 860.05             |
| A_68_P20024136 | chr1:-9788012-9788056                             | NM_133220:-176      | Sgk3       | PROMOTER               | 0.5                                                          | 6.334                          | 1031.83            | 6535.47            | 3.164                          | 1133.83            | 3587.67            |
| A_68_P32070015 | chr19:32462327-32462371                           | NM_144792:596       | Sgms1      | INSIDE                 | 0.409                                                        | 1.506                          | 3440.03            | 5181.96            | 0.616                          | 2622.05            | 1616.43            |
| A_68_P31244849 | chr17:53828675-53828719                           | NM_028232:-56       | Sgol1      | PROMOTER               | 0.486                                                        | 4.297                          | 2110.37            | 9069.26            | 2.09                           | 1787.18            | 3735.90            |
| A_68_P31244848 | chr17:53828528-53828572                           | NM_028232:90        | Sgol1      | INSIDE                 | 0.335                                                        | 0.592                          | 1348.66            | 798.22             | 0.198                          | 1103.45            | 218.88             |
| A_68_P28550068 | chr12:76836769-76836813                           | NM_030750:-74       | Sgpp1      | PROMOTER               | 0.357                                                        | 0.645                          | 1614.73            | 1042.21            | 0.23                           | 1034.79            | 238.46             |
| A_68_P20370950 | chr1:78306691-78306735                            | NM_001004173:-208   | Sgpp2      | PROMOTER               | 0.399                                                        | 0.225                          | 2698.76            | 606.08             | 0.09                           | 2029.14            | 181.69             |
| A_68_P23997432 | chr5:113739494-113739538                          | NM_172718:290       | Sgsm1      | INSIDE                 | 0.389                                                        | 7.640                          | 3609.71            | 27577.42           | 2.976                          | 3233.51            | 9621.84            |
| A_68_P23997435 | chr5:113739797-113739841                          | NM_172718:-12       | Sgsm1      | PROMOTER               | 0.404                                                        | 0.590                          | 1257.06            | 741.36             | 0.238                          | 1025.37            | 244.17             |
| A_68_P27923093 | chr11:74710538-74710582                           | NM_197943:22        | Sgsm2      | INSIDE                 | 0.523                                                        | 3.838                          | 2014.72            | 7732.11            | 2.008                          | 1808.41            | 3631.27            |
| A_68_P29288687 | chr13:104899925-104899970                         | NM_144838:78        | Sgtb       | INSIDE                 | 0.623                                                        | 0.459                          | 3803.84            | 1747.20            | 0.286                          | 2921.93            | 836.11             |
| A_68_P24120143 | chr5:136720679-136720723                          | NM_018825:73        | Sh2b2      | INSIDE                 | 0.629                                                        | 2.912                          | 1531.74            | 4460.46            | 1.831                          | 1303.73            | 2387.58            |
| A_68_P24046791 | chr5:122286329-122286373                          | NM_008507:460       | Sh2b3      | INSIDE                 | 0.264                                                        | 0.466                          | 1726.12            | 804.70             | 0.123                          | 1351.57            | 166.39             |
| A_68_P24046730 | chr5:122278610-122278654                          | NM_008507:8178      | Sh2b3      | INSIDE                 | 0.444                                                        | 6.699                          | 937.07             | 6277.09            | 2.975                          | 731.32             | 2175.72            |
| A_68_P21117161 | chr2:32597158-32597202                            | NM_013781:20589     | Sh2d3c     | INSIDE                 | 0.422                                                        | 6.622                          | 1984.58            | 13142.66           | 2.795                          | 1611.98            | 4506.04            |
| A_68_P23344730 | chr4:137806358-137806402                          | NM_001099631:55     | Sh2d5      | INSIDE                 | 0.597                                                        | 0.259                          | 2531.11            | 655.76             | 0.155                          | 1815.77            | 280.87             |
| A_68_P26684174 | chr9:83442213-83442257                            | NM_172507:290       | Sh3bgrl2   | INSIDE                 | 0.187                                                        | 9.065                          | 1760.84            | 15961.54           | 1.697                          | 1491.47            | 2531.67            |
| A_68_P23594807 | chr5:34868707-34868751                            | NM_011893:296       | Sh3bp2     | INSIDE                 | 0.15                                                         | 1.851                          | 3976.36            | 7359.05            | 0.277                          | 2749.22            | 761.55             |
| A_68_P23594805 | chr5:34868409-34868453                            | NM_011893:-2        | Sh3bp2     | PROMOTER               | 0.512                                                        | 52.477                         | 3688.71            | 193572.60          | 26.884                         | 4262.09            | 114580.20          |
| A_68_P27830412 | chr11:58144420-58144464                           | NM_001161338:223    | Sh3bp5l    | INSIDE                 | 0.635                                                        | 2.439                          | 1305.05            | 3183.30            | 1.548                          | 1062.66            | 1645.17            |
| A_68_P31253474 | chr17:56175980-56176024                           | NM_013664:-3        | Sh3gl1     | DIVERGENT_PROMOTER     | 0.131                                                        | 31.459                         | 7444.54            | 234194.90          | 4.124                          | 7326.39            | 30212.16           |
| A_68_P32150072 | chr19:47538682-47538726                           | NM_001164717:197    | Sh3pxd2a   | INSIDE                 | 0.612                                                        | 0.645                          | 1760.40            | 1135.58            | 0.395                          | 1340.64            | 529.18             |
| A_68_P32149065 | chr19:47388402-47388446                           | NM_001164717:150477 | Sh3pxd2a   | INSIDE                 | 0.623                                                        | 3.537                          | 400.11             | 1415.08            | 2.204                          | 324.69             | 715.73             |
| A_68_P27688273 | chr11:32248073-32248117                           | NM_177364:284       | Sh3pxd2b   | INSIDE                 | 0.539                                                        | 0.671                          | 5260.44            | 3527.37            | 0.362                          | 4176.44            | 1510.54            |
| A_68_P25908468 | chr8:63703117-63703161                            | NM_021506:171       | Sh3rf1     | INSIDE                 | 0.568                                                        | 3.392                          | 2336.59            | 7926.42            | 1.927                          | 2188.74            | 4216.89            |
| A_68_P27165498 | chr10:58275060-58275104                           | NM_172788:-1024     | Sh3rf3     | PROMOTER               | 0.457                                                        | 4.578                          | 8141.16            | 37273.25           | 2.094                          | 5777.23            | 12096.18           |
| A_68_P27165512 | chr10:58276626-58276670                           | NM_172788:542       | Sh3rf3     | INSIDE                 | 0.618                                                        | 4.377                          | 979.13             | 4285.71            | 2.704                          | 964.58             | 2608.64            |
| A_68_P27165497 | chr10:58274956-58275000                           | NM_172788:-1128     | Sh3rf3     | PROMOTER               | 0.537                                                        | 0.457                          | 1074.77            | 491.12             | 0.245                          | 814.59             | 199.89             |
| A_68_P28328449 | chr12:31596572-31596616                           | NM_013709:61        | Sh3yl1     | INSIDE                 | 0.616                                                        | 0.466                          | 1228.16            | 572.73             | 0.287                          | 940.82             | 270.05             |
| A_68_P25086960 | chr7:51607818-51607862                            | NM_001034115:42207  | Shank1     | INSIDE                 | 0.279                                                        | 10.961                         | 6501.73            | 71268.62           | 3.055                          | 6680.07            | 20408.74           |
| A_68_P25086855 | chr7:51591550-51591594                            | NM_001034115:25939  | Shank1     | INSIDE                 | 0.397                                                        | 8.565                          | 2601.89            | 22284.29           | 3.403                          | 2049.50            | 6973.43            |
| A_68_P25086970 | chr7:51608696-51608740                            | NM_001034115:43085  | Shank1     | INSIDE                 | 0.488                                                        | 0.447                          | 1316.34            | 588.72             | 0.218                          | 935.29             | 204.30             |
| A_68_P25086973 | chr7:51609094-51609138                            | NM_001034115:43483  | Shank1     | INSIDE                 | 0.307                                                        | 1.627                          | 3158.44            | 5139.86            | 0.499                          | 2098.70            | 1047.18            |
| A_68_P25086993 | chr7:51612401-51612445                            | NM_001034115:46789  | Shank1     | INSIDE                 | 0.589                                                        | 0.602                          | 2803.45            | 1687.35            | 0.355                          | 1991.09            | 705.97             |
| A_68_P30425837 | chr15:89378103-89378147                           | NM_021423:47837     | Shank3     | INSIDE                 | 0.248                                                        | 1.759                          | 3752.30            | 6599.53            | 0.437                          | 2812.98            | 1229.05            |
| A_68_P30425531 | chr15:89329734-89329778                           | NM_021423:-531      | Shank3     | PROMOTER               | 0.341                                                        | 0.433                          | 2392.38            | 1036.55            | 0.148                          | 1708.70            | 252.46             |
| A_68_P30425530 | chr15:89329634-89329678                           | NM_021423:-631      | Shank3     | PROMOTER               | 0.354                                                        | 0.389                          | 1916.37            | 745.78             | 0.138                          | 1272.46            | 175.29             |
| A_68_P30425529 | chr15:89329556-89329600                           | NM_021423:-709      | Shank3     | PROMOTER               | 0.39                                                         | 5.027                          | 1658.38            | 8336.83            | 1.961                          | 1526.83            | 2994.82            |
| A_68_P30425839 | chr15:89378376-89378420                           | NM_021423:48111     | Shank3     | INSIDE                 | 0.264                                                        | 1.360                          | 2837.83            | 3860.63            | 0.359                          | 1739.34            | 625.18             |
| A_68_P30425916 | chr15:89388272-89388316                           | NM_021423:58007     | Shank3     | INSIDE                 | 0.302                                                        | 5.886                          | 1077.18            | 6339.77            | 1.78                           | 894.50             | 1591.79            |
| A_68_P22883653 | chr4:45543529-45543573                            | NM_001033306:150    | Shb        | INSIDE                 | 0.292                                                        | 9.867                          | 1094.08            | 10795.81           | 2.882                          | 781.32             | 2251.62            |

| ProbeName      | Target position of probe on CpG island microarray | TargetID           | GeneSymbol | CpG island Description | Ratio of relative methylation (TiO <sub>2</sub> -NP/Vehicle) | Sham group                     |                    |                    | TiO <sub>2</sub> -H group      |                    |                    |
|----------------|---------------------------------------------------|--------------------|------------|------------------------|--------------------------------------------------------------|--------------------------------|--------------------|--------------------|--------------------------------|--------------------|--------------------|
|                |                                                   |                    |            |                        |                                                              | Relative methylation (Cy5/Cy3) | Cy3 signal (Input) | Cy5 signal (MeDIP) | Relative methylation (Cy5/Cy3) | Cy3 signal (Input) | Cy5 signal (MeDIP) |
| A_68_P22883647 | chr4:45542639-45542683                            | NM_001033306:1040  | Shb        | INSIDE                 | 0.493                                                        | 7.258                          | 835.70             | 6065.18            | 3.578                          | 826.92             | 2958.73            |
| A_68_P22883652 | chr4:45543353-45543397                            | NM_001033306:326   | Shb        | INSIDE                 | 0.216                                                        | 7.018                          | 1413.36            | 9919.59            | 1.519                          | 1206.72            | 1833.07            |
| A_68_P27277981 | chr10:79100167-79100211                           | NM_001024539:475   | She2       | INSIDE                 | 0.364                                                        | 0.433                          | 1534.33            | 664.89             | 0.158                          | 1070.97            | 168.86             |
| A_68_P27277984 | chr10:79100620-79100664                           | NM_001024539:21    | She2       | INSIDE                 | 0.555                                                        | 3.622                          | 2102.56            | 7615.93            | 2.009                          | 1718.62            | 3452.40            |
| A_68_P29033142 | chr13:51662332-51662377                           | NM_009167:99       | She3       | INSIDE                 | 0.388                                                        | 5.536                          | 2770.47            | 15336.94           | 2.147                          | 2172.90            | 4665.06            |
| A_68_P31253054 | chr17:56109780-56109824                           | NM_001159523:-102  | Shd        | PROMOTER               | 0.437                                                        | 0.412                          | 2328.20            | 958.09             | 0.18                           | 1808.33            | 324.95             |
| A_68_P31253055 | chr17:56109896-56109940                           | NM_001159523:14    | Shd        | INSIDE                 | 0.612                                                        | 0.376                          | 5273.30            | 1981.68            | 0.23                           | 3978.26            | 915.32             |
| A_68_P22321898 | chr3:89634943-89634987                            | NM_172530:-327     | She        | PROMOTER               | 0.206                                                        | 11.500                         | 1292.82            | 14867.42           | 2.373                          | 1188.13            | 2820.02            |
| A_68_P22321899 | chr3:89635034-89635078                            | NM_172530:-235     | She        | PROMOTER               | 0.658                                                        | 8.314                          | 1545.46            | 12848.45           | 5.469                          | 1447.86            | 7918.31            |
| A_68_P21585947 | chr2:122174316-122174360                          | NM_001013829:20316 | Shf        | DOWNSTREAM             | 0.296                                                        | 5.405                          | 1209.03            | 6535.32            | 1.6                            | 996.65             | 1594.88            |
| A_68_P23768850 | chr5:67999647-67999692                            | NM_001033415:548   | Shisa3     | INSIDE                 | 0.408                                                        | 4.683                          | 1759.23            | 8238.34            | 1.91                           | 1406.89            | 2686.51            |
| A_68_P23768847 | chr5:67999277-67999321                            | NM_001033415:177   | Shisa3     | INSIDE                 | 0.563                                                        | 0.633                          | 772.62             | 489.39             | 0.357                          | 674.82             | 240.66             |
| A_68_P20638991 | chr1:137271378-137271422                          | NM_175259:240      | Shisa4     | INSIDE                 | 0.224                                                        | 0.174                          | 6423.69            | 1117.98            | 0.039                          | 4263.38            | 166.10             |
| A_68_P24950762 | chr7:4788423-4788469                              | NM_172737:7852     | Shisa7     | INSIDE                 | 0.529                                                        | 6.789                          | 1929.91            | 13102.79           | 3.594                          | 1356.23            | 4874.35            |
| A_68_P24950760 | chr7:4788206-4788250                              | NM_172737:8070     | Shisa7     | INSIDE                 | 0.588                                                        | 7.049                          | 732.08             | 5160.73            | 4.146                          | 736.41             | 3052.89            |
| A_68_P24950759 | chr7:4788111-4788155                              | NM_172737:8166     | Shisa7     | INSIDE                 | 0.621                                                        | 4.371                          | 1191.87            | 5209.93            | 2.714                          | 1008.51            | 2736.63            |
| A_68_P24950724 | chr7:4781725-4781769                              | NM_172737:14552    | Shisa7     | INSIDE                 | 0.487                                                        | 3.387                          | 3272.08            | 11083.24           | 1.651                          | 2714.68            | 4480.70            |
| A_68_P30550104 | chr16:11984103-11984147                           | NM_001174086:-81   | Shisa9     | PROMOTER               | 0.135                                                        | 12.731                         | 9176.63            | 116832.20          | 1.715                          | 7469.81            | 12810.96           |
| A_68_P32185492 | chr19:54018463-54018507                           | NM_001168505:-311  | Shoc2      | PROMOTER               | 0.137                                                        | 21.032                         | 396.12             | 8330.95            | 2.878                          | 434.92             | 1251.77            |
| A_68_P32185499 | chr19:54019439-54019483                           | NM_019658:95       | Shoc2      | INSIDE                 | 0.428                                                        | 1.399                          | 1267.94            | 1773.90            | 0.599                          | 1202.18            | 719.71             |
| A_68_P22207889 | chr3:66784973-66785017                            | NM_013665:699      | Shox2      | INSIDE                 | 0.382                                                        | 0.522                          | 2397.58            | 1251.08            | 0.199                          | 1882.51            | 375.08             |
| A_68_P22207824 | chr3:66777458-66777502                            | NM_013665:8213     | Shox2      | INSIDE                 | 0.63                                                         | 2.518                          | 3490.16            | 8787.59            | 1.587                          | 2944.89            | 4673.70            |
| A_68_P27915805 | chr11:73013090-73013134                           | NM_029031:129      | Shpk       | INSIDE                 | 0.412                                                        | 8.157                          | 953.47             | 7777.44            | 3.357                          | 849.11             | 2850.46            |
| A_68_P27804897 | chr11:53277337-53277381                           | NM_027917:6652     | Shroom1    | INSIDE                 | 0.633                                                        | 4.544                          | 600.90             | 2730.59            | 2.878                          | 591.07             | 1701.38            |
| A_68_P32234207 | chrX:5977686-5977730                              | NM_001040459:446   | Shroom4    | INSIDE                 | 0.129                                                        | 16.582                         | 744.12             | 12339.33           | 2.138                          | 1001.84            | 2141.56            |
| A_68_P32234202 | chrX:5977172-5977216                              | NM_001040459:-68   | Shroom4    | PROMOTER               | 0.373                                                        | 6.338                          | 1532.78            | 9715.36            | 2.363                          | 1758.02            | 4154.78            |
| A_68_P26031095 | chr8:89269939-89269983                            | NM_009172:-55      | Siah1a     | PROMOTER               | 0.655                                                        | 4.399                          | 426.05             | 1874.08            | 2.883                          | 455.75             | 1313.75            |
| A_68_P32796350 | chrX:160514136-160514180                          | NM_009173:-177     | Siah1b     | PROMOTER               | 0.229                                                        | 12.860                         | 1208.95            | 15547.29           | 2.951                          | 1769.35            | 5221.04            |
| A_68_P22169673 | chr3:58495733-58495777                            | NM_009174:556      | Siah2      | INSIDE                 | 0.567                                                        | 3.590                          | 1245.46            | 4471.05            | 2.037                          | 1075.95            | 2191.71            |
| A_68_P22169679 | chr3:58496414-58496458                            | NM_009174:-126     | Siah2      | PROMOTER               | 0.4                                                          | 0.553                          | 1062.20            | 587.76             | 0.221                          | 888.28             | 196.59             |
| A_68_P26477010 | chr9:45763375-45763419                            | NM_172257:-64      | Sidt2      | PROMOTER               | 0.661                                                        | 0.621                          | 1049.63            | 651.58             | 0.411                          | 795.66             | 326.64             |
| A_68_P31850942 | chr18:78244032-78244076                           | NM_001101038:9953  | Siglec15   | INSIDE                 | 0.571                                                        | 4.696                          | 465.22             | 2184.50            | 2.679                          | 511.26             | 1369.72            |
| A_68_P31850954 | chr18:78245651-78245695                           | NM_001101038:8335  | Siglec15   | INSIDE                 | 0.444                                                        | 3.743                          | 1736.13            | 6497.61            | 1.663                          | 1522.18            | 2531.48            |
| A_68_P22864089 | chr4:41687680-41687724                            | NM_011014:484      | Sigmar1    | INSIDE                 | 0.474                                                        | 0.248                          | 2503.00            | 621.17             | 0.118                          | 1890.70            | 222.53             |
| A_68_P31142312 | chr17:31992898-31992942                           | NM_010831:-183     | Sik1       | PROMOTER               | 0.601                                                        | 0.482                          | 1818.98            | 876.21             | 0.29                           | 1487.58            | 430.88             |
| A_68_P31142309 | chr17:31992389-31992433                           | NM_010831:327      | Sik1       | INSIDE                 | 0.356                                                        | 0.716                          | 4413.93            | 3158.28            | 0.255                          | 3279.48            | 836.39             |
| A_68_P31142266 | chr17:31986924-31986968                           | NM_010831:5791     | Sik1       | INSIDE                 | 0.238                                                        | 2.007                          | 1090.53            | 2188.18            | 0.478                          | 833.65             | 398.13             |
| A_68_P26506990 | chr9:50816646-50816690                            | NM_178710:510      | Sik2       | INSIDE                 | 0.503                                                        | 0.672                          | 1628.63            | 1094.26            | 0.338                          | 1294.56            | 437.73             |
| A_68_P26506991 | chr9:50816720-50816764                            | NM_178710:436      | Sik2       | INSIDE                 | 0.513                                                        | 2.689                          | 3771.68            | 10142.20           | 1.379                          | 3030.87            | 4178.37            |
| A_68_P26477292 | chr9:45821526-45821572                            | NM_027498:646      | Sik3       | INSIDE                 | 0.625                                                        | 8.570                          | 926.50             | 7940.16            | 5.357                          | 793.63             | 4251.53            |
| A_68_P22383782 | chr3:102799932-102799976                          | NM_025679:292      | Sike1      | INSIDE                 | 0.247                                                        | 8.584                          | 3585.39            | 30777.25           | 2.122                          | 2547.28            | 5405.25            |
| A_68_P26540098 | chr9:56924586-56924630                            | NM_001110350:426   | Sin3a      | INSIDE                 | 0.544                                                        | 0.613                          | 3977.29            | 2437.32            | 0.334                          | 3107.69            | 1036.89            |
| A_68_P26540100 | chr9:56924835-56924879                            | NM_001110350:674   | Sin3a      | INSIDE                 | 0.657                                                        | 0.593                          | 937.70             | 556.48             | 0.39                           | 857.98             | 334.42             |
| A_68_P25962756 | chr8:75273840-75273884                            | NM_009188:26676    | Sin3b      | INSIDE                 | 0.347                                                        | 5.760                          | 1028.65            | 5925.31            | 1.996                          | 795.41             | 1587.88            |
| A_68_P31929912 | chr19:5654628-5654672                             | NM_001164480:9057  | Sipa1      | INSIDE                 | 0.659                                                        | 0.593                          | 1901.34            | 1128.13            | 0.391                          | 1234.93            | 483.00             |
| A_68_P31929910 | chr19:5654473-5654517                             | NM_001164480:9213  | Sipa1      | INSIDE                 | 0.25                                                         | 5.596                          | 4344.72            | 24310.99           | 1.4                            | 3787.09            | 5301.82            |



| ProbeName      | Target position of probe on CpG island microarray | TargetID            | GeneSymbol | CpG island Description | Ratio of relative methylation (TiO <sub>2</sub> -NP/Vehicle) | Sham group                     |                    |                    | TiO <sub>2</sub> -H group      |                    |                    |
|----------------|---------------------------------------------------|---------------------|------------|------------------------|--------------------------------------------------------------|--------------------------------|--------------------|--------------------|--------------------------------|--------------------|--------------------|
|                |                                                   |                     |            |                        |                                                              | Relative methylation (Cy5/Cy3) | Cy3 signal (Input) | Cy5 signal (MeDIP) | Relative methylation (Cy5/Cy3) | Cy3 signal (Input) | Cy5 signal (MeDIP) |
| A_68_P28585119 | chr12:83270170-83270214                           | NM_001167983:-810   | Sipa1l1    | PROMOTER               | 0.513                                                        | 19.116                         | 1183.65            | 22626.43           | 9.805                          | 1007.89            | 9882.41            |
| A_68_P28585121 | chr12:83270447-83270491                           | NM_001167983:-534   | Sipa1l1    | PROMOTER               | 0.073                                                        | 1.567                          | 2823.57            | 4425.88            | 0.115                          | 2025.68            | 232.16             |
| A_68_P28585130 | chr12:83271372-83271416                           | NM_001167983:392    | Sipa1l1    | INSIDE                 | 0.631                                                        | 0.662                          | 1432.44            | 947.99             | 0.417                          | 1162.02            | 485.02             |
| A_68_P25026631 | chr7:30117136-30117180                            | NM_001081028:173321 | Sipa1l3    | INSIDE                 | 0.181                                                        | 11.388                         | 2921.14            | 33264.66           | 2.056                          | 1955.80            | 4020.36            |
| A_68_P21625558 | chr2:129418959-129419003                          | NM_001177647:50     | Sirpa      | INSIDE                 | 0.324                                                        | 8.829                          | 1245.58            | 10996.65           | 2.863                          | 1057.85            | 3028.71            |
| A_68_P25585439 | chr7:148067707-148067751                          | NM_001127351:40     | Sirt3      | INSIDE                 | 0.511                                                        | 0.182                          | 4799.28            | 874.23             | 0.093                          | 3218.55            | 299.73             |
| A_68_P25585440 | chr7:148067788-148067832                          | NM_001127351:-42    | Sirt3      | PROMOTER               | 0.254                                                        | 2.420                          | 5916.50            | 14316.09           | 0.616                          | 4741.91            | 2919.75            |
| A_68_P24009835 | chr5:115942032-115942076                          | NM_133760:-7561     | Sirt4      | PROMOTER               | 0.416                                                        | 0.649                          | 5467.43            | 3550.52            | 0.27                           | 3681.75            | 995.48             |
| A_68_P28751514 | chr12:113883371-113883415                         | NM_001161737:354    | Siva1      | INSIDE                 | 0.358                                                        | 0.558                          | 1172.51            | 654.06             | 0.2                            | 874.57             | 174.52             |
| A_68_P28535268 | chr12:74147049-74147093                           | NM_009189:629       | Six1       | INSIDE                 | 0.576                                                        | 0.495                          | 1419.93            | 703.57             | 0.285                          | 1042.55            | 297.58             |
| A_68_P28535257 | chr12:74145983-74146027                           | NM_009189:1695      | Six1       | INSIDE                 | 0.655                                                        | 4.019                          | 982.34             | 3947.92            | 2.631                          | 851.00             | 2238.63            |
| A_68_P31412114 | chr17:86086928-86086972                           | NM_011380:644       | Six2       | INSIDE                 | 0.304                                                        | 13.015                         | 1597.76            | 20795.58           | 3.954                          | 1430.45            | 5656.20            |
| A_68_P31412155 | chr17:86092046-86092090                           | NM_011380:-4474     | Six2       | PROMOTER               | 0.409                                                        | 0.296                          | 1756.29            | 520.02             | 0.121                          | 1420.77            | 171.86             |
| A_68_P31412116 | chr17:86087149-86087193                           | NM_011380:424       | Six2       | INSIDE                 | 0.558                                                        | 4.908                          | 741.39             | 3638.39            | 2.738                          | 707.33             | 1936.83            |
| A_68_P31411779 | chr17:86022957-86023001                           | NM_011381:2805      | Six3       | INSIDE                 | 0.595                                                        | 4.461                          | 1342.19            | 5987.56            | 2.653                          | 1429.32            | 3792.07            |
| A_68_P31411712 | chr17:86014601-86014645                           | NR_038085:3114      | Six3os1    | INSIDE                 | 0.318                                                        | 9.717                          | 10273.14           | 99827.86           | 3.091                          | 7725.37            | 23881.48           |
| A_68_P28535622 | chr12:74213314-74213358                           | NM_011382:896       | Six4       | INSIDE                 | 0.104                                                        | 0.392                          | 5498.39            | 2152.84            | 0.041                          | 4292.50            | 174.41             |
| A_68_P28535628 | chr12:74213900-74213944                           | NM_011382:310       | Six4       | INSIDE                 | 0.292                                                        | 0.423                          | 2875.82            | 1217.02            | 0.123                          | 1971.95            | 243.45             |
| A_68_P28535623 | chr12:74213467-74213511                           | NM_011382:744       | Six4       | INSIDE                 | 0.62                                                         | 0.277                          | 1809.29            | 501.42             | 0.172                          | 1015.45            | 174.58             |
| A_68_P24991405 | chr7:19680434-19680478                            | NM_011383:564       | Six5       | INSIDE                 | 0.434                                                        | 0.626                          | 751.45             | 470.51             | 0.272                          | 634.33             | 172.26             |
| A_68_P28534667 | chr12:74041473-74041517                           | NM_011384:563       | Six6       | INSIDE                 | 0.4                                                          | 0.585                          | 949.68             | 555.89             | 0.234                          | 744.83             | 174.18             |
| A_68_P31830207 | chr18:74367434-74367478                           | NM_001164355:16     | Ska1       | INSIDE                 | 0.349                                                        | 0.459                          | 1376.40            | 631.32             | 0.16                           | 1067.62            | 170.74             |
| A_68_P24447786 | chr6:51962237-51962281                            | NM_018773:290       | Skap2      | INSIDE                 | 0.407                                                        | 0.424                          | 2170.54            | 920.35             | 0.173                          | 1652.40            | 285.26             |
| A_68_P23437240 | chr4:154596449-154596493                          | NM_011385:174       | Ski        | INSIDE                 | 0.257                                                        | 9.407                          | 1575.26            | 14818.71           | 2.414                          | 1453.57            | 3509.40            |
| A_68_P23437242 | chr4:154597147-154597191                          | NM_011385:-524      | Ski        | PROMOTER               | 0.616                                                        | 3.277                          | 413.53             | 1355.19            | 2.02                           | 409.16             | 826.46             |
| A_68_P22031739 | chr3:30993591-30993635                            | NM_001039090:-370   | Skil       | PROMOTER               | 0.496                                                        | 4.434                          | 1055.85            | 4681.81            | 2.197                          | 925.85             | 2034.53            |
| A_68_P22031742 | chr3:30994277-30994321                            | NM_001039090:316    | Skil       | INSIDE                 | 0.529                                                        | 0.441                          | 5998.94            | 2645.47            | 0.233                          | 4304.00            | 1003.50            |
| A_68_P22031740 | chr3:30993764-30993808                            | NM_001039090:-196   | Skil       | PROMOTER               | 0.599                                                        | 3.150                          | 539.48             | 1699.23            | 1.888                          | 470.05             | 887.32             |
| A_68_P31156111 | chr17:34987166-34987210                           | NM_021337:-39       | Skiv2l     | DIVERGENT_PROMOTER     | 0.48                                                         | 8.801                          | 896.18             | 7887.38            | 4.227                          | 875.59             | 3701.06            |
| A_68_P26574053 | chr9:62986483-62986527                            | NM_172446:8283      | Skor1      | INSIDE                 | 0.388                                                        | 21.249                         | 353.95             | 7521.13            | 8.239                          | 276.94             | 2281.83            |
| A_68_P26574137 | chr9:62997201-62997245                            | NM_001163758:-454   | Skor1      | PROMOTER               | 0.546                                                        | 6.685                          | 881.08             | 5890.19            | 3.648                          | 708.70             | 2585.49            |
| A_68_P26574111 | chr9:62993729-62993773                            | NM_172446:1037      | Skor1      | INSIDE                 | 0.366                                                        | 6.693                          | 496.67             | 3324.03            | 2.452                          | 438.49             | 1074.96            |
| A_68_P31844540 | chr18:77098052-77098096                           | NM_001109743:2931   | Skor2      | INSIDE                 | 0.478                                                        | 7.802                          | 2093.95            | 16336.46           | 3.73                           | 1816.15            | 6774.82            |
| A_68_P31844550 | chr18:77099205-77099249                           | NM_001109743:4083   | Skor2      | INSIDE                 | 0.625                                                        | 0.323                          | 4990.29            | 1610.35            | 0.202                          | 3042.20            | 613.93             |
| A_68_P31844544 | chr18:77098440-77098484                           | NM_001109743:3319   | Skor2      | INSIDE                 | 0.324                                                        | 1.371                          | 2975.82            | 4079.68            | 0.445                          | 2425.40            | 1078.73            |
| A_68_P23794550 | chr5:73305332-73305376                            | NM_001113423:-201   | Slain2     | PROMOTER               | 0.646                                                        | 2.350                          | 1936.76            | 4551.74            | 1.518                          | 1457.36            | 2212.50            |
| A_68_P23590298 | chr5:33995400-33995444                            | NM_009193:-467      | Sllbp      | PROMOTER               | 0.312                                                        | 6.572                          | 4585.69            | 30138.39           | 2.053                          | 3829.61            | 7863.65            |
| A_68_P25989168 | chr8:81033011-81033055                            | NM_029736:-201      | Sle10a7    | DIVERGENT_PROMOTER     | 0.277                                                        | 1.395                          | 1461.72            | 2039.57            | 0.387                          | 1097.15            | 424.60             |
| A_68_P30485732 | chr15:100253831-100253875                         | NM_008732:-366      | Sle11a2    | PROMOTER               | 0.563                                                        | 0.565                          | 3034.38            | 1714.61            | 0.318                          | 2275.44            | 723.35             |
| A_68_P31738737 | chr18:58039024-58039069                           | NM_009194:715       | Sle12a2    | INSIDE                 | 0.526                                                        | 3.909                          | 820.82             | 3208.83            | 2.058                          | 748.27             | 1540.08            |
| A_68_P31738728 | chr18:58037843-58037887                           | NM_009194:-467      | Sle12a2    | PROMOTER               | 0.494                                                        | 3.332                          | 1467.47            | 4890.07            | 1.648                          | 1281.34            | 2111.34            |
| A_68_P26137064 | chr8:108489850-108489894                          | NM_009195:67        | Sle12a4    | INSIDE                 | 0.629                                                        | 0.631                          | 2083.23            | 1313.72            | 0.397                          | 1570.95            | 623.13             |
| A_68_P21820794 | chr2:164793741-164793785                          | NM_020333:275       | Sle12a5    | INSIDE                 | 0.337                                                        | 26.873                         | 4930.95            | 132507.70          | 9.043                          | 6853.92            | 61980.75           |
| A_68_P21820992 | chr2:164823190-164823234                          | NM_020333:29725     | Sle12a5    | INSIDE                 | 0.497                                                        | 9.013                          | 1694.84            | 15275.83           | 4.478                          | 1249.45            | 5595.64            |
| A_68_P21820797 | chr2:164794239-164794283                          | NM_020333:773       | Sle12a5    | INSIDE                 | 0.613                                                        | 5.299                          | 639.76             | 3390.24            | 3.247                          | 496.03             | 1610.42            |
| A_68_P21820817 | chr2:164796549-164796593                          | NM_020333:3083      | Sle12a5    | INSIDE                 | 0.463                                                        | 0.698                          | 1730.06            | 1207.33            | 0.323                          | 1414.90            | 457.24             |

| ProbeName      | Target position of probe on CpG island microarray | TargetID           | GeneSymbol | CpG island Description | Ratio of relative methylation (TiO <sub>2</sub> -NP/Vehicle) | Sham group                     |                    |                    | TiO <sub>2</sub> -H group      |                    |                    |
|----------------|---------------------------------------------------|--------------------|------------|------------------------|--------------------------------------------------------------|--------------------------------|--------------------|--------------------|--------------------------------|--------------------|--------------------|
|                |                                                   |                    |            |                        |                                                              | Relative methylation (Cy5/Cy3) | Cy3 signal (Input) | Cy5 signal (MeDIP) | Relative methylation (Cy5/Cy3) | Cy3 signal (Input) | Cy5 signal (MeDIP) |
| A_68_P21820739 | chr2:164786459-164786503                          | NM_020333:-7007    | Slc12a5    | PROMOTER               | 0.431                                                        | 4.919                          | 844.63             | 4154.70            | 2.121                          | 662.02             | 1403.82            |
| A_68_P21820991 | chr2:164823054-164823098                          | NM_020333:29589    | Slc12a5    | INSIDE                 | 0.412                                                        | 3.738                          | 1805.92            | 6750.66            | 1.542                          | 1791.03            | 2761.46            |
| A_68_P21820793 | chr2:164793533-164793577                          | NM_020333:67       | Slc12a5    | INSIDE                 | 0.544                                                        | 2.634                          | 3391.28            | 8932.75            | 1.434                          | 2458.40            | 3525.23            |
| A_68_P29141936 | chr13:73901069-73901113                           | NM_011390:-54      | Slc12a7    | PROMOTER               | 0.118                                                        | 32.934                         | 1613.23            | 53129.70           | 3.895                          | 1325.01            | 5160.40            |
| A_68_P29141935 | chr13:73901004-73901048                           | NM_011390:-118     | Slc12a7    | PROMOTER               | 0.557                                                        | 4.262                          | 3282.09            | 13989.70           | 2.374                          | 2548.77            | 6050.33            |
| A_68_P24078663 | chr5:128097296-128097340                          | NM_133895:444      | Slc15a4    | INSIDE                 | 0.619                                                        | 3.087                          | 614.40             | 1896.37            | 1.91                           | 537.33             | 1026.19            |
| A_68_P22392370 | chr3:104442843-104442887                          | NM_009196:274      | Slc16a1    | INSIDE                 | 0.483                                                        | 6.456                          | 1407.99            | 9090.06            | 3.116                          | 1227.02            | 3823.22            |
| A_68_P22392371 | chr3:104442921-104442965                          | NM_009196:352      | Slc16a1    | INSIDE                 | 0.626                                                        | 0.386                          | 1465.46            | 566.38             | 0.242                          | 1274.09            | 308.04             |
| A_68_P32081999 | chr19:34821540-34821584                           | NM_172838:39       | Slc16a12   | INSIDE                 | 0.583                                                        | 0.529                          | 1315.86            | 695.76             | 0.308                          | 1004.37            | 309.60             |
| A_68_P27899519 | chr11:70034182-70034226                           | NM_172371:292      | Slc16a13   | INSIDE                 | 0.641                                                        | 0.324                          | 1565.83            | 507.01             | 0.208                          | 1103.68            | 229.02             |
| A_68_P32574197 | chrX:100890665-100890709                          | NM_009197:126641   | Slc16a2    | DOWNSTREAM             | 0.315                                                        | 1.904                          | 1132.49            | 2156.26            | 0.599                          | 1711.20            | 1024.90            |
| A_68_P28187724 | chr11:120812178-120812222                         | NM_001038653:1820  | Slc16a3    | INSIDE                 | 0.522                                                        | 0.299                          | 2214.02            | 661.22             | 0.156                          | 1563.77            | 243.56             |
| A_68_P28187710 | chr11:120810691-120810735                         | NM_001038653:332   | Slc16a3    | INSIDE                 | 0.505                                                        | 3.000                          | 1170.72            | 3512.26            | 1.514                          | 955.55             | 1446.52            |
| A_68_P28118794 | chr11:109334955-109334999                         | NM_001029842:-66   | Slc16a6    | PROMOTER               | 0.387                                                        | 4.439                          | 2630.53            | 11676.20           | 1.719                          | 2101.79            | 3613.44            |
| A_68_P28118793 | chr11:109334829-109334873                         | NM_001029842:60    | Slc16a6    | INSIDE                 | 0.378                                                        | 1.436                          | 1139.50            | 1635.92            | 0.543                          | 1037.64            | 563.52             |
| A_68_P27228617 | chr10:69707740-69707784                           | NM_025807:-261     | Slc16a9    | PROMOTER               | 0.179                                                        | 9.797                          | 3144.99            | 30810.94           | 1.751                          | 2501.21            | 4379.18            |
| A_68_P27228619 | chr10:69707994-69708038                           | NM_025807:-7       | Slc16a9    | PROMOTER               | 0.55                                                         | 15.837                         | 1618.75            | 25635.75           | 8.704                          | 1504.39            | 13093.78           |
| A_68_P25091604 | chr7:52431430-52431474                            | NM_182993:12162    | Slc17a7    | INSIDE                 | 0.38                                                         | 0.442                          | 7594.95            | 3360.72            | 0.168                          | 4071.35            | 684.56             |
| A_68_P25091507 | chr7:52417775-52417819                            | NM_182993:-1494    | Slc17a7    | PROMOTER               | 0.409                                                        | 8.732                          | 2697.36            | 23552.26           | 3.574                          | 2574.00            | 9199.22            |
| A_68_P25091605 | chr7:52431556-52431600                            | NM_182993:12288    | Slc17a7    | DOWNSTREAM             | 0.357                                                        | 1.356                          | 9000.55            | 12204.20           | 0.484                          | 6068.21            | 2937.91            |
| A_68_P25946260 | chr8:71612907-71612951                            | NM_153054:193      | Slc18a1    | INSIDE                 | 0.649                                                        | 0.558                          | 832.01             | 464.20             | 0.362                          | 678.38             | 245.68             |
| A_68_P27265504 | chr10:76495615-76495659                           | NM_031196:-320     | Slc19a1    | PROMOTER               | 0.292                                                        | 2.074                          | 4712.37            | 9772.15            | 0.605                          | 3574.02            | 2163.40            |
| A_68_P20788009 | chr1:166179184-166179228                          | NM_054087:21       | Slc19a2    | INSIDE                 | 0.351                                                        | 0.405                          | 3794.18            | 1538.11            | 0.142                          | 3055.85            | 435.03             |
| A_68_P20788007 | chr1:166178862-166178906                          | NM_054087:-301     | Slc19a2    | PROMOTER               | 0.577                                                        | 0.226                          | 2066.81            | 467.83             | 0.13                           | 1509.83            | 197.02             |
| A_68_P20788011 | chr1:166179434-166179478                          | NM_054087:271      | Slc19a2    | INSIDE                 | 0.461                                                        | 1.381                          | 1471.47            | 2031.48            | 0.637                          | 1271.99            | 810.24             |
| A_68_P21478259 | chr2:102498900-102498944                          | NM_001077514:83    | Slc1a2     | INSIDE                 | 0.58                                                         | 0.484                          | 1239.71            | 599.68             | 0.28                           | 1037.42            | 290.83             |
| A_68_P30001153 | chr15:8586301-8586345                             | NM_148938:74485    | Slc1a3     | INSIDE                 | 0.515                                                        | 5.240                          | 824.55             | 4320.80            | 2.698                          | 671.80             | 1812.50            |
| A_68_P27630973 | chr11:20232357-20232401                           | NM_018861:338      | Slc1a4     | INSIDE                 | 0.528                                                        | 0.706                          | 1377.04            | 972.57             | 0.373                          | 1063.63            | 396.61             |
| A_68_P24983214 | chr7:17367558-17367602                            | NM_009201:886      | Slc1a5     | INSIDE                 | 0.613                                                        | 0.430                          | 2356.48            | 1012.36            | 0.263                          | 1749.54            | 460.61             |
| A_68_P21623516 | chr2:129024287-129024331                          | NM_001159593:-200  | Slc20a1    | PROMOTER               | 0.359                                                        | 6.009                          | 1879.39            | 11293.74           | 2.159                          | 1657.36            | 3577.44            |
| A_68_P21623523 | chr2:129025044-129025088                          | NM_001159593:558   | Slc20a1    | INSIDE                 | 0.19                                                         | 1.541                          | 1009.83            | 1556.30            | 0.293                          | 858.59             | 251.74             |
| A_68_P28938191 | chr13:34436110-34436154                           | NM_001033167:919   | Slc22a3    | INSIDE                 | 0.295                                                        | 8.969                          | 4281.69            | 38402.14           | 2.648                          | 3062.90            | 8111.00            |
| A_68_P27807844 | chr11:53841558-53841603                           | NM_019687:12       | Slc22a4    | INSIDE                 | 0.575                                                        | 0.572                          | 1750.54            | 1000.60            | 0.329                          | 1337.83            | 439.62             |
| A_68_P27807186 | chr11:53705037-53705081                           | NM_011396:147      | Slc22a5    | INSIDE                 | 0.553                                                        | 2.872                          | 3290.34            | 9451.29            | 1.589                          | 2519.74            | 4004.61            |
| A_68_P24039145 | chr5:120961107-120961151                          | NM_001177594:-72   | Slc24a6    | DIVERGENT_PROMOTER     | 0.613                                                        | 2.581                          | 5449.23            | 14066.54           | 1.582                          | 3993.33            | 6317.74            |
| A_68_P28184908 | chr11:120353660-120353704                         | NM_013770:532      | Slc25a10   | INSIDE                 | 0.437                                                        | 0.640                          | 1704.38            | 1090.48            | 0.28                           | 1265.83            | 354.02             |
| A_68_P27901831 | chr11:70460715-70460759                           | NM_024211:-241     | Slc25a11   | DIVERGENT_PROMOTER     | 0.154                                                        | 14.381                         | 1754.75            | 25234.36           | 2.219                          | 1429.90            | 3172.75            |
| A_68_P30377507 | chr15:81190981-81191029                           | NM_011399:191      | Slc25a17   | INSIDE                 | 0.145                                                        | 1.809                          | 800.98             | 1448.95            | 0.261                          | 660.67             | 172.72             |
| A_68_P28154496 | chr11:115489226-115489270                         | NM_026071:205      | Slc25a19   | INSIDE                 | 0.322                                                        | 0.348                          | 2792.67            | 971.50             | 0.112                          | 2015.96            | 225.91             |
| A_68_P26816015 | chr9:108564655-108564699                          | NM_020520:248      | Slc25a20   | INSIDE                 | 0.44                                                         | 4.988                          | 1631.14            | 8136.49            | 2.195                          | 1381.79            | 3032.84            |
| A_68_P25588799 | chr7:148623331-148623375                          | NM_001177576:-2859 | Slc25a22   | PROMOTER               | 0.569                                                        | 0.358                          | 2994.05            | 1072.98            | 0.204                          | 2033.30            | 414.36             |
| A_68_P25588800 | chr7:148623401-148623445                          | NM_001177576:-2929 | Slc25a22   | PROMOTER               | 0.574                                                        | 0.722                          | 2008.57            | 1449.57            | 0.414                          | 1539.81            | 638.23             |
| A_68_P25588801 | chr7:148623566-148623613                          | NM_001177576:-3096 | Slc25a22   | PROMOTER               | 0.499                                                        | 3.239                          | 1050.14            | 3401.27            | 1.616                          | 929.14             | 1501.40            |
| A_68_P31259834 | chr17:57199854-57199898                           | NM_025877:-590     | Slc25a23   | DIVERGENT_PROMOTER     | 0.249                                                        | 8.628                          | 1851.23            | 15972.05           | 2.145                          | 1452.38            | 3114.88            |
| A_68_P32127978 | chr19:43749225-43749269                           | NM_145156:125      | Slc25a28   | INSIDE                 | 0.337                                                        | 9.672                          | 4767.17            | 46105.84           | 3.256                          | 4149.56            | 13512.10           |
| A_68_P28730238 | chr12:110073635-110073679                         | NM_181328:430      | Slc25a29   | INSIDE                 | 0.54                                                         | 0.630                          | 1453.93            | 915.32             | 0.34                           | 1147.03            | 389.73             |

| ProbeName      | Target position of probe on CpG island microarray | TargetID          | GeneSymbol | CpG island Description | Ratio of relative methylation (TiO <sub>2</sub> -NP/Vehicle) | Sham group                     |                    |                    | TiO <sub>2</sub> -H group      |                    |                    |
|----------------|---------------------------------------------------|-------------------|------------|------------------------|--------------------------------------------------------------|--------------------------------|--------------------|--------------------|--------------------------------|--------------------|--------------------|
|                |                                                   |                   |            |                        |                                                              | Relative methylation (Cy5/Cy3) | Cy3 signal (Input) | Cy5 signal (MeDIP) | Relative methylation (Cy5/Cy3) | Cy3 signal (Input) | Cy5 signal (MeDIP) |
| A_68_P23402414 | chr4:149148446-149148491                          | NM_027460:-92     | Slc25a33   | PROMOTER               | 0.334                                                        | 16.405                         | 4873.22            | 79942.86           | 5.486                          | 4274.75            | 23450.02           |
| A_68_P29695467 | chr14:69902363-69902407                           | NM_026331:776     | Slc25a37   | INSIDE                 | 0.327                                                        | 1.896                          | 2334.71            | 4425.71            | 0.62                           | 1745.34            | 1082.93            |
| A_68_P29695466 | chr14:69902277-69902321                           | NM_026331:862     | Slc25a37   | INSIDE                 | 0.421                                                        | 1.599                          | 2278.00            | 3642.92            | 0.672                          | 1789.57            | 1203.45            |
| A_68_P26876104 | chr9:120020031-120020078                          | NM_144793:538     | Slc25a38   | INSIDE                 | 0.449                                                        | 3.725                          | 848.74             | 3161.44            | 1.672                          | 702.11             | 1174.24            |
| A_68_P25834907 | chr8:47296398-47296442                            | NM_007450:-57     | Slc25a4    | PROMOTER               | 0.647                                                        | 0.501                          | 1598.02            | 799.97             | 0.324                          | 939.14             | 303.99             |
| A_68_P32319888 | chrX:34283671-34283715                            | NM_001085497:39   | Slc25a43   | INSIDE                 | 0.349                                                        | 6.883                          | 2519.25            | 17339.68           | 2.4                            | 2023.86            | 4857.96            |
| A_68_P31598790 | chr18:31769072-31769116                           | NM_026165:462     | Slc25a46   | INSIDE                 | 0.433                                                        | 10.601                         | 1006.97            | 10675.03           | 4.59                           | 1010.75            | 4639.80            |
| A_68_P31598791 | chr18:31769247-31769291                           | NM_026165:288     | Slc25a46   | INSIDE                 | 0.478                                                        | 6.929                          | 1151.43            | 7978.72            | 3.309                          | 972.22             | 3217.24            |
| A_68_P23973506 | chr5:109106670-109106714                          | NM_174870:-2024   | Slc26a1    | PROMOTER               | 0.464                                                        | 0.315                          | 4302.76            | 1354.94            | 0.146                          | 2778.35            | 405.53             |
| A_68_P28177384 | chr11:119217045-119217089                         | NM_178743:196     | Slc26a11   | INSIDE                 | 0.51                                                         | 0.497                          | 1671.09            | 830.85             | 0.254                          | 1336.47            | 339.20             |
| A_68_P28177386 | chr11:119217235-119217283                         | NM_178743:388     | Slc26a11   | INSIDE                 | 0.524                                                        | 5.591                          | 1935.77            | 10822.04           | 2.931                          | 1525.85            | 4471.54            |
| A_68_P28332010 | chr12:32244021-32244065                           | NM_011867:792     | Slc26a4    | INSIDE                 | 0.466                                                        | 5.125                          | 807.09             | 4136.68            | 2.388                          | 676.91             | 1616.68            |
| A_68_P25957546 | chr8:74094381-74094431                            | NM_011977:1581    | Slc27a1    | INSIDE                 | 0.168                                                        | 0.738                          | 2797.77            | 2065.35            | 0.124                          | 2048.84            | 253.96             |
| A_68_P21608666 | chr2:126378873-126378917                          | NM_011978:135     | Slc27a2    | INSIDE                 | 0.259                                                        | 6.556                          | 808.33             | 5299.02            | 1.697                          | 834.43             | 1416.22            |
| A_68_P22324942 | chr3:90193856-90193900                            | NM_011988:-29     | Slc27a3    | PROMOTER               | 0.479                                                        | 6.118                          | 960.33             | 5874.99            | 2.931                          | 769.28             | 2254.56            |
| A_68_P22324939 | chr3:90193494-90193538                            | NM_011988:333     | Slc27a3    | INSIDE                 | 0.593                                                        | 3.792                          | 1298.80            | 4925.30            | 2.25                           | 1065.92            | 2398.60            |
| A_68_P21099538 | chr2:29658204-29658248                            | NM_011989:27      | Slc27a4    | INSIDE                 | 0.225                                                        | 0.446                          | 2253.00            | 1004.55            | 0.1                            | 1708.28            | 171.17             |
| A_68_P31202059 | chr17:45732650-45732694                           | NM_001199116:-151 | Slc29a1    | PROMOTER               | 0.517                                                        | 0.460                          | 2913.28            | 1341.48            | 0.238                          | 2115.33            | 503.37             |
| A_68_P31926384 | chr19:5024260-5024304                             | NM_007854:277     | Slc29a2    | INSIDE                 | 0.484                                                        | 0.475                          | 1966.71            | 935.16             | 0.23                           | 1569.34            | 361.44             |
| A_68_P24153011 | chr5:143194631-143194675                          | NM_146257:16598   | Slc29a4    | INSIDE                 | 0.224                                                        | 6.011                          | 6344.96            | 38139.95           | 1.349                          | 4446.52            | 5998.52            |
| A_68_P23243653 | chr4:118781349-118781393                          | NM_011400:21      | Slc2a1     | INSIDE                 | 0.391                                                        | 0.539                          | 2541.84            | 1368.84            | 0.21                           | 1617.51            | 340.35             |
| A_68_P30436287 | chr15:91403612-91403656                           | NM_001033633:58   | Slc2a13    | INSIDE                 | 0.421                                                        | 19.472                         | 4168.66            | 81173.45           | 8.197                          | 3773.79            | 30933.86           |
| A_68_P27898121 | chr11:69761400-69761444                           | NM_009204:270     | Slc2a4     | INSIDE                 | 0.073                                                        | 4.222                          | 1460.49            | 6166.78            | 0.309                          | 1026.80            | 316.95             |
| A_68_P27898124 | chr11:69761728-69761772                           | NM_009204:-58     | Slc2a4     | PROMOTER               | 0.277                                                        | 0.417                          | 11628.89           | 4853.51            | 0.116                          | 7608.48            | 879.93             |
| A_68_P20940733 | chr1:193730478-193730522                          | NM_009579:-159    | Slc30a1    | PROMOTER               | 0.634                                                        | 2.342                          | 2407.96            | 5640.00            | 1.484                          | 1856.91            | 2756.09            |
| A_68_P23322292 | chr4:133899412-133899456                          | NM_001039677:450  | Slc30a2    | INSIDE                 | 0.508                                                        | 0.408                          | 2752.68            | 1123.50            | 0.207                          | 1827.11            | 378.83             |
| A_68_P23576450 | chr5:31396001-31396045                            | NM_011773:-122    | Slc30a3    | PROMOTER               | 0.214                                                        | 1.947                          | 3951.78            | 7693.18            | 0.416                          | 2743.87            | 1142.19            |
| A_68_P23576447 | chr5:31395717-31395761                            | NM_011773:162     | Slc30a3    | INSIDE                 | 0.434                                                        | 7.776                          | 1766.69            | 13737.23           | 3.373                          | 1457.31            | 4915.89            |
| A_68_P23576449 | chr5:31395933-31395977                            | NM_011773:-54     | Slc30a3    | PROMOTER               | 0.406                                                        | 1.693                          | 5007.10            | 8477.13            | 0.687                          | 3946.31            | 2709.73            |
| A_68_P21587592 | chr2:122528587-122528631                          | NM_011774:-209    | Slc30a4    | PROMOTER               | 0.159                                                        | 25.581                         | 1702.69            | 43556.69           | 4.059                          | 1548.85            | 6287.05            |
| A_68_P21587589 | chr2:122528219-122528263                          | NM_011774:159     | Slc30a4    | INSIDE                 | 0.532                                                        | 3.093                          | 1108.79            | 3429.47            | 1.645                          | 913.54             | 1502.55            |
| A_68_P29270336 | chr13:101602642-101602692                         | NM_022885:716     | Slc30a5    | INSIDE                 | 0.322                                                        | 20.384                         | 1100.44            | 22430.95           | 6.564                          | 847.81             | 5565.00            |
| A_68_P31351306 | chr17:74795028-74795072                           | NM_144798:79      | Slc30a6    | INSIDE                 | 0.45                                                         | 0.405                          | 1154.03            | 467.67             | 0.182                          | 948.97             | 172.95             |
| A_68_P22963537 | chr4:61947638-61947682                            | NM_025286:182     | Slc31a2    | INSIDE                 | 0.52                                                         | 3.324                          | 4896.97            | 16275.66           | 1.73                           | 3921.15            | 6782.82            |
| A_68_P22963535 | chr4:61947389-61947433                            | NM_025286:-68     | Slc31a2    | PROMOTER               | 0.557                                                        | 3.484                          | 1111.75            | 3872.77            | 1.94                           | 944.05             | 1831.32            |
| A_68_P21783928 | chr2:158436941-158436985                          | NM_009508:469     | Slc32a1    | INSIDE                 | 0.181                                                        | 29.114                         | 14996.71           | 436611.40          | 5.271                          | 16820.22           | 88661.24           |
| A_68_P21783953 | chr2:158439712-158439756                          | NM_009508:3241    | Slc32a1    | INSIDE                 | 0.405                                                        | 0.161                          | 3981.05            | 639.05             | 0.065                          | 2654.73            | 172.76             |
| A_68_P21783917 | chr2:158435595-158435639                          | NM_009508:-877    | Slc32a1    | PROMOTER               | 0.452                                                        | 0.093                          | 6111.51            | 570.88             | 0.042                          | 4033.42            | 170.38             |
| A_68_P21783954 | chr2:158439815-158439861                          | NM_009508:3345    | Slc32a1    | INSIDE                 | 0.491                                                        | 0.228                          | 2520.65            | 574.17             | 0.112                          | 1663.17            | 185.86             |
| A_68_P22194351 | chr3:63768401-63768445                            | NM_015728:233     | Slc33a1    | INSIDE                 | 0.481                                                        | 0.411                          | 1246.80            | 512.84             | 0.198                          | 989.48             | 195.71             |
| A_68_P22450819 | chr3:116414740-116414784                          | NM_144902:436     | Slc35a3    | INSIDE                 | 0.366                                                        | 1.367                          | 1864.89            | 2549.32            | 0.501                          | 1739.25            | 871.08             |
| A_68_P31201839 | chr17:45701335-45701379                           | NM_028662:256     | Slc35b2    | INSIDE                 | 0.554                                                        | 2.784                          | 1794.01            | 4995.31            | 1.542                          | 1531.12            | 2360.79            |
| A_68_P28963697 | chr13:39052368-39052412                           | NM_001170430:16   | Slc35b3    | INSIDE                 | 0.474                                                        | 3.559                          | 2302.28            | 8192.98            | 1.687                          | 1958.86            | 3304.00            |
| A_68_P24354189 | chr6:34126897-34126941                            | NM_021435:136     | Slc35b4    | INSIDE                 | 0.642                                                        | 0.618                          | 1721.62            | 1064.21            | 0.397                          | 1306.18            | 517.99             |
| A_68_P23165023 | chr4:102888044-102888088                          | NM_177732:-577    | Slc35d1    | PROMOTER               | 0.328                                                        | 1.611                          | 1410.75            | 2272.84            | 0.529                          | 1101.54            | 582.85             |
| A_68_P26983368 | chr10:19569800-19569844                           | NM_029529:1443    | Slc35d3    | INSIDE                 | 0.625                                                        | 0.452                          | 1701.95            | 769.14             | 0.282                          | 1358.54            | 383.51             |

| ProbeName      | Target position of probe on CpG island microarray | TargetID           | GeneSymbol | CpG island Description | Ratio of relative methylation (TiO <sub>2</sub> -NP/Vehicle) | Sham group                     |                    |                    | TiO <sub>2</sub> -H group      |                    |                    |
|----------------|---------------------------------------------------|--------------------|------------|------------------------|--------------------------------------------------------------|--------------------------------|--------------------|--------------------|--------------------------------|--------------------|--------------------|
|                |                                                   |                    |            |                        |                                                              | Relative methylation (Cy5/Cy3) | Cy3 signal (Input) | Cy5 signal (MeDIP) | Relative methylation (Cy5/Cy3) | Cy3 signal (Input) | Cy5 signal (MeDIP) |
| A_68_P26983377 | chr10:19570989-19571033                           | NM_029529:255      | Slc35d3    | INSIDE                 | 0.464                                                        | 3.432                          | 2047.16            | 7026.53            | 1.592                          | 1596.30            | 2541.29            |
| A_68_P27554683 | chr11:3813912-3813956                             | NM_153142:733      | Slc35e4    | INSIDE                 | 0.302                                                        | 6.056                          | 5203.76            | 31515.42           | 1.827                          | 4266.49            | 7795.66            |
| A_68_P27554682 | chr11:3813819-3813863                             | NM_153142:827      | Slc35e4    | INSIDE                 | 0.488                                                        | 3.984                          | 3481.57            | 13871.58           | 1.946                          | 2569.06            | 4998.35            |
| A_68_P27138493 | chr10:52410426-52410470                           | NM_178675:142      | Slc35f1    | INSIDE                 | 0.602                                                        | 4.569                          | 2398.89            | 10960.25           | 2.749                          | 2340.94            | 6435.97            |
| A_68_P27138496 | chr10:52410751-52410795                           | NM_178675:466      | Slc35f1    | INSIDE                 | 0.384                                                        | 4.090                          | 1888.03            | 7721.63            | 1.57                           | 1555.69            | 2443.17            |
| A_68_P26256736 | chr8:128822425-128822469                          | NM_175434:-32      | Slc35f3    | PROMOTER               | 0.442                                                        | 0.265                          | 4066.54            | 1075.99            | 0.117                          | 2853.48            | 333.41             |
| A_68_P20585375 | chr1:127456906-127456950                          | NM_028787:-664     | Slc35f5    | PROMOTER               | 0.449                                                        | 11.503                         | 1748.27            | 20110.30           | 5.159                          | 1613.02            | 8321.73            |
| A_68_P20585376 | chr1:127456998-127457042                          | NM_028787:-572     | Slc35f5    | PROMOTER               | 0.581                                                        | 0.360                          | 1398.66            | 503.43             | 0.209                          | 1022.14            | 213.84             |
| A_68_P20585382 | chr1:127457522-127457566                          | NM_028787:-48      | Slc35f5    | PROMOTER               | 0.593                                                        | 6.394                          | 1131.57            | 7235.56            | 3.793                          | 1030.12            | 3907.32            |
| A_68_P31138852 | chr17:31433001-31433045                           | NM_153062:595      | Slc37a1    | INSIDE                 | 0.349                                                        | 0.564                          | 1730.34            | 976.44             | 0.197                          | 1323.48            | 260.43             |
| A_68_P24382792 | chr6:39327695-39327739                            | NM_028123:-10      | Slc37a3    | DIVERGENT_PROMOTER     | 0.445                                                        | 0.512                          | 1063.19            | 544.83             | 0.228                          | 938.11             | 213.90             |
| A_68_P30464706 | chr15:96472084-96472128                           | NM_134086:287      | Slc38a1    | INSIDE                 | 0.43                                                         | 0.497                          | 1137.01            | 565.10             | 0.214                          | 878.03             | 187.74             |
| A_68_P30464716 | chr15:96473367-96473411                           | NM_001166458:-44   | Slc38a1    | PROMOTER               | 0.578                                                        | 0.614                          | 2168.50            | 1331.30            | 0.355                          | 1539.61            | 546.55             |
| A_68_P30465077 | chr15:96529839-96529883                           | NM_175121:269      | Slc38a2    | INSIDE                 | 0.534                                                        | 2.618                          | 2067.46            | 5412.61            | 1.399                          | 1793.58            | 2509.59            |
| A_68_P20203509 | chr1:46909562-46909606                            | NM_172653:770      | Slc39a10   | INSIDE                 | 0.596                                                        | 0.509                          | 1373.09            | 698.70             | 0.303                          | 1150.61            | 348.80             |
| A_68_P21420493 | chr2:90910689-90910733                            | NM_026721:-332     | Slc39a13   | PROMOTER               | 0.261                                                        | 12.838                         | 3650.51            | 46863.91           | 3.344                          | 2985.87            | 9985.84            |
| A_68_P29700848 | chr14:70750798-70750842                           | NM_001135152:-2580 | Slc39a14   | PROMOTER               | 0.303                                                        | 0.627                          | 1650.41            | 1035.16            | 0.19                           | 1193.48            | 226.98             |
| A_68_P31560903 | chr18:24761642-24761686                           | NM_139143:654      | Slc39a6    | INSIDE                 | 0.339                                                        | 7.099                          | 2729.12            | 19374.04           | 2.408                          | 2467.88            | 5943.63            |
| A_68_P31560905 | chr18:24761962-24762006                           | NM_139143:334      | Slc39a6    | INSIDE                 | 0.509                                                        | 4.928                          | 1341.48            | 6611.05            | 2.506                          | 1075.63            | 2695.86            |
| A_68_P31943154 | chr19:8787857-8787901                             | NM_008577:509      | Slc3a2     | INSIDE                 | 0.518                                                        | 0.551                          | 1326.04            | 730.75             | 0.285                          | 1166.47            | 333.00             |
| A_68_P31943158 | chr19:8788397-8788441                             | NM_008577:-31      | Slc3a2     | PROMOTER               | 0.612                                                        | 4.707                          | 1804.66            | 8493.88            | 2.881                          | 1498.30            | 4316.92            |
| A_68_P20617850 | chr1:133724396-133724440                          | NM_173865:-170     | Slc41a1    | PROMOTER               | 0.348                                                        | 0.274                          | 3584.13            | 982.94             | 0.095                          | 2461.52            | 234.84             |
| A_68_P22923084 | chr4:53453754-53453798                            | NM_001159633:492   | Slc44a1    | INSIDE                 | 0.197                                                        | 18.588                         | 3346.21            | 62198.84           | 3.656                          | 2657.29            | 9715.04            |
| A_68_P23407530 | chr4:150026271-150026315                          | NM_173774:-9       | Slc45a1    | PROMOTER               | 0.431                                                        | 12.611                         | 848.79             | 10704.51           | 5.429                          | 803.59             | 4362.92            |
| A_68_P27943494 | chr11:78279579-78279623                           | NM_026740:398      | Slc46a1    | INSIDE                 | 0.425                                                        | 12.199                         | 6528.71            | 79640.88           | 5.184                          | 5706.41            | 29579.39           |
| A_68_P27943490 | chr11:78279217-78279261                           | NM_026740:36       | Slc46a1    | INSIDE                 | 0.406                                                        | 1.574                          | 1621.38            | 2551.60            | 0.639                          | 1428.04            | 912.23             |
| A_68_P21631241 | chr2:130523070-130523114                          | NM_001081162:163   | Slc4a11    | INSIDE                 | 0.278                                                        | 10.025                         | 868.22             | 8703.72            | 2.788                          | 801.89             | 2235.54            |
| A_68_P23541735 | chr5:23931232-23931276                            | NM_009207:205      | Slc4a2     | INSIDE                 | 0.478                                                        | 0.436                          | 1088.83            | 474.19             | 0.208                          | 823.76             | 171.46             |
| A_68_P20354814 | chr1:75542871-75542915                            | NM_009208:52       | Slc4a3     | INSIDE                 | 0.121                                                        | 23.504                         | 2431.65            | 57153.29           | 2.851                          | 2080.10            | 5930.51            |
| A_68_P20354818 | chr1:75543316-75543360                            | NM_009208:498      | Slc4a3     | INSIDE                 | 0.404                                                        | 9.897                          | 4981.69            | 49304.31           | 3.998                          | 4554.15            | 18207.95           |
| A_68_P29421307 | chr14:15536004-15536048                           | NM_001033270:488   | Slc4a7     | INSIDE                 | 0.64                                                         | 5.139                          | 809.97             | 4162.26            | 3.29                           | 747.28             | 2458.52            |
| A_68_P27327917 | chr10:88348711-88348755                           | NM_145423:-4       | Slc5a8     | PROMOTER               | 0.202                                                        | 20.755                         | 1522.29            | 31595.58           | 4.184                          | 1398.24            | 5849.87            |
| A_68_P24764863 | chr6:114232692-114232736                          | NM_178703:86       | Slc6a1     | INSIDE                 | 0.271                                                        | 1.590                          | 3849.50            | 6121.86            | 0.431                          | 2880.77            | 1241.81            |
| A_68_P24764867 | chr6:114233070-114233114                          | NM_178703:464      | Slc6a1     | INSIDE                 | 0.474                                                        | 3.014                          | 2246.96            | 6772.79            | 1.429                          | 1766.54            | 2523.81            |
| A_68_P27406628 | chr10:102830256-102830300                         | NM_175328:-198     | Slc6a15    | PROMOTER               | 0.455                                                        | 0.608                          | 2389.03            | 1452.70            | 0.277                          | 1894.58            | 523.86             |
| A_68_P27406629 | chr10:102830356-102830400                         | NM_175328:-98      | Slc6a15    | PROMOTER               | 0.254                                                        | 2.394                          | 2950.70            | 7063.49            | 0.608                          | 2134.34            | 1297.66            |
| A_68_P26068970 | chr8:95484812-95484856                            | NM_009209:-111     | Slc6a2     | PROMOTER               | 0.598                                                        | 6.545                          | 317.46             | 2077.85            | 3.916                          | 237.22             | 929.01             |
| A_68_P27935204 | chr11:76811878-76811922                           | NM_010484:-198     | Slc6a4     | PROMOTER               | 0.365                                                        | 5.713                          | 1387.74            | 7927.47            | 2.085                          | 1286.59            | 2683.04            |
| A_68_P25115500 | chr7:57167143-57167187                            | NM_148931:95       | Slc6a5     | INSIDE                 | 0.412                                                        | 0.486                          | 1098.37            | 533.61             | 0.2                            | 856.33             | 171.53             |
| A_68_P25115504 | chr7:57167691-57167735                            | NM_148931:643      | Slc6a5     | INSIDE                 | 0.429                                                        | 0.471                          | 2537.49            | 1194.41            | 0.202                          | 1718.90            | 347.46             |
| A_68_P32464061 | chrX:70918592-70918636                            | NM_001142809:143   | Slc6a8     | INSIDE                 | 0.606                                                        | 8.556                          | 1555.52            | 13309.22           | 5.183                          | 1950.56            | 10108.87           |
| A_68_P23236661 | chr4:117508209-117508255                          | NM_008135:370      | Slc6a9     | INSIDE                 | 0.24                                                         | 0.303                          | 4098.47            | 1243.51            | 0.073                          | 2444.37            | 177.80             |
| A_68_P23236660 | chr4:117508118-117508162                          | NM_008135:278      | Slc6a9     | INSIDE                 | 0.31                                                         | 0.403                          | 3167.64            | 1277.95            | 0.125                          | 2129.47            | 265.96             |
| A_68_P23236670 | chr4:117509289-117509333                          | NM_008135:1448     | Slc6a9     | INSIDE                 | 0.349                                                        | 9.632                          | 2421.70            | 23325.77           | 3.358                          | 1994.34            | 6697.05            |
| A_68_P23236917 | chr4:117540757-117540801                          | NM_008135:32916    | Slc6a9     | INSIDE                 | 0.429                                                        | 4.154                          | 2324.66            | 9657.02            | 1.783                          | 1937.72            | 3455.48            |
| A_68_P23236665 | chr4:117508655-117508699                          | NM_008135:814      | Slc6a9     | INSIDE                 | 0.547                                                        | 3.122                          | 2474.39            | 7726.08            | 1.706                          | 1632.51            | 2785.86            |

| ProbeName      | Target position of probe on CpG island microarray | TargetID           | GeneSymbol | CpG island Description | Ratio of relative methylation (TiO <sub>2</sub> -NP/Vehicle) | Sham group                     |                    |                    | TiO <sub>2</sub> -H group      |                    |                    |
|----------------|---------------------------------------------------|--------------------|------------|------------------------|--------------------------------------------------------------|--------------------------------|--------------------|--------------------|--------------------------------|--------------------|--------------------|
|                |                                                   |                    |            |                        |                                                              | Relative methylation (Cy5/Cy3) | Cy3 signal (Input) | Cy5 signal (MeDIP) | Relative methylation (Cy5/Cy3) | Cy3 signal (Input) | Cy5 signal (MeDIP) |
| A_68_P23236664 | chr4:117508530-117508574                          | NM_008135:690      | Slc6a9     | INSIDE                 | 0.343                                                        | 4.702                          | 1879.56            | 8838.23            | 1.611                          | 1694.97            | 2731.00            |
| A_68_P25048054 | chr7:35970299-35970343                            | NM_017394:-1083    | Slc7a10    | PROMOTER               | 0.452                                                        | 0.588                          | 2533.37            | 1489.96            | 0.266                          | 1646.65            | 438.00             |
| A_68_P25807719 | chr8:41947388-41947432                            | NM_007514:-310     | Slc7a2     | PROMOTER               | 0.201                                                        | 24.936                         | 4237.04            | 105656.80          | 5.023                          | 5343.37            | 26840.43           |
| A_68_P26229674 | chr8:124431610-124431654                          | NM_011404:-46      | Slc7a5     | DIVERGENT_PROMOTER     | 0.433                                                        | 4.786                          | 3723.50            | 17819.10           | 2.07                           | 2905.12            | 6015.02            |
| A_68_P26138122 | chr8:108692733-108692777                          | NM_178798:-20      | Slc7a6     | PROMOTER               | 0.387                                                        | 28.841                         | 2528.24            | 72917.60           | 11.151                         | 2539.59            | 28319.56           |
| A_68_P26138124 | chr8:108693007-108693051                          | NM_178798:254      | Slc7a6     | INSIDE                 | 0.523                                                        | 0.577                          | 2790.28            | 1609.39            | 0.302                          | 2096.69            | 633.09             |
| A_68_P26138372 | chr8:108734689-108734733                          | NM_001007567:123   | Slc7a6os   | INSIDE                 | 0.648                                                        | 4.770                          | 1409.93            | 6725.36            | 3.093                          | 1244.13            | 3847.48            |
| A_68_P29614298 | chr14:55400102-55400146                           | NM_016972:599      | Slc7a8     | INSIDE                 | 0.378                                                        | 0.288                          | 2374.56            | 683.49             | 0.109                          | 1643.20            | 178.92             |
| A_68_P24979913 | chr7:16730734-16730778                            | NM_148946:15108    | Slc8a2     | INSIDE                 | 0.445                                                        | 6.366                          | 4370.43            | 27824.25           | 2.834                          | 3721.43            | 10547.02           |
| A_68_P24980002 | chr7:16744202-16744246                            | NM_148946:28576    | Slc8a2     | INSIDE                 | 0.365                                                        | 0.697                          | 1718.95            | 1198.69            | 0.255                          | 1399.58            | 356.59             |
| A_68_P23317226 | chr4:132925776-132925820                          | NM_016981:112      | Slc9a1     | INSIDE                 | 0.318                                                        | 0.312                          | 2793.50            | 870.82             | 0.099                          | 2172.60            | 215.43             |
| A_68_P20172913 | chr1:40738293-40738337                            | NM_001033289:-242  | Slc9a2     | PROMOTER               | 0.495                                                        | 3.568                          | 620.92             | 2215.36            | 1.768                          | 587.94             | 1039.32            |
| A_68_P26133225 | chr8:107873334-107873378                          | NM_001081332:1199  | Slc9a5     | INSIDE                 | 0.576                                                        | 0.630                          | 1972.18            | 1242.39            | 0.363                          | 1528.75            | 554.93             |
| A_68_P26133220 | chr8:107872806-107872850                          | NM_001081332:671   | Slc9a5     | INSIDE                 | 0.658                                                        | 2.242                          | 1560.60            | 3499.31            | 1.475                          | 1254.24            | 1849.89            |
| A_68_P32396713 | chrX:53862851-53862895                            | NM_172780:-139     | Slc9a6     | PROMOTER               | 0.523                                                        | 9.509                          | 1106.81            | 10524.94           | 4.976                          | 1279.05            | 6364.30            |
| A_68_P32287972 | chrX:19869101-19869145                            | NM_177353:-232     | Slc9a7     | PROMOTER               | 0.554                                                        | 4.493                          | 1197.28            | 5379.45            | 2.491                          | 1426.88            | 3554.22            |
| A_68_P26783273 | chr9:102910754-102910801                          | NM_033314:-41      | Slco2a1    | PROMOTER               | 0.478                                                        | 0.133                          | 4354.79            | 579.95             | 0.064                          | 2740.78            | 174.64             |
| A_68_P25235399 | chr7:81699616-81699660                            | NM_001038643:28    | Slco3a1    | INSIDE                 | 0.623                                                        | 7.709                          | 1065.28            | 8212.05            | 4.801                          | 923.64             | 4434.64            |
| A_68_P20038598 | chr1:12982722-12982766                            | NM_172841:-1528    | Slco5a1    | PROMOTER               | 0.226                                                        | 0.472                          | 2190.54            | 1033.05            | 0.106                          | 1598.88            | 170.27             |
| A_68_P20038584 | chr1:12980774-12980818                            | NM_172841:420      | Slco5a1    | INSIDE                 | 0.629                                                        | 0.470                          | 1005.03            | 472.27             | 0.295                          | 901.35             | 266.25             |
| A_68_P20038625 | chr1:12986560-12986610                            | NM_172841:-5368    | Slco5a1    | PROMOTER               | 0.396                                                        | 1.375                          | 2545.68            | 3500.83            | 0.545                          | 1750.50            | 953.83             |
| A_68_P23668870 | chr5:48377571-48377615                            | NM_178804:3199     | Slit2      | INSIDE                 | 0.379                                                        | 5.782                          | 2273.35            | 13145.51           | 2.19                           | 2010.74            | 4403.22            |
| A_68_P22236489 | chr3:72861536-72861580                            | NM_198864:-693     | Slitrk3    | PROMOTER               | 0.351                                                        | 6.020                          | 8763.30            | 52758.28           | 2.111                          | 6452.19            | 13617.50           |
| A_68_P22236487 | chr3:72861315-72861359                            | NM_198864:-471     | Slitrk3    | PROMOTER               | 0.403                                                        | 3.480                          | 2431.63            | 8460.95            | 1.403                          | 1984.19            | 2784.57            |
| A_68_P32427541 | chrX:61528987-61529031                            | NM_178740:1163     | Slitrk4    | INSIDE                 | 0.491                                                        | 3.020                          | 1465.31            | 4425.97            | 1.483                          | 2035.70            | 3018.86            |
| A_68_P29482222 | chr14:27353534-27353578                           | NM_032008:-330     | Slmap      | PROMOTER               | 0.373                                                        | 6.911                          | 1775.01            | 12266.26           | 2.575                          | 1413.60            | 3640.72            |
| A_68_P29482229 | chr14:27354402-27354446                           | NM_032008:-1198    | Slmap      | PROMOTER               | 0.267                                                        | 2.296                          | 2302.60            | 5286.47            | 0.613                          | 1853.86            | 1136.99            |
| A_68_P31791990 | chr18:67624448-67624492                           | NM_144867:-32      | Slmo1      | PROMOTER               | 0.527                                                        | 4.872                          | 799.23             | 3894.15            | 2.569                          | 703.45             | 1807.15            |
| A_68_P31841968 | chr18:76400994-76401038                           | NM_010754:-562     | Smad2      | PROMOTER               | 0.662                                                        | 3.759                          | 790.84             | 2972.69            | 2.488                          | 782.28             | 1946.28            |
| A_68_P29062977 | chr13:56805003-56805048                           | NM_001164042:-3    | Smad5      | PROMOTER               | 0.212                                                        | 17.542                         | 2796.88            | 49063.25           | 3.724                          | 2594.73            | 9662.27            |
| A_68_P29062978 | chr13:56805103-56805147                           | NM_001164042:96    | Smad5      | INSIDE                 | 0.546                                                        | 0.343                          | 1657.23            | 568.61             | 0.187                          | 1263.29            | 236.65             |
| A_68_P22149790 | chr3:54590088-54590132                            | NM_019483:30607    | Smad9      | INSIDE                 | 0.401                                                        | 8.574                          | 3894.07            | 33385.96           | 3.438                          | 2801.68            | 9632.19            |
| A_68_P30486832 | chr15:100467219-100467263                         | NM_174992:46       | Smagp      | INSIDE                 | 0.339                                                        | 6.654                          | 943.29             | 6277.07            | 2.256                          | 829.56             | 1871.82            |
| A_68_P30486834 | chr15:100467426-100467470                         | NM_001033872:-152  | Smagp      | PROMOTER               | 0.389                                                        | 4.251                          | 1846.52            | 7848.79            | 1.654                          | 1448.11            | 2395.13            |
| A_68_P23254536 | chr4:120689836-120689880                          | NM_133716:-6       | Smagp2     | PROMOTER               | 0.316                                                        | 4.620                          | 2617.04            | 12091.59           | 1.459                          | 2389.05            | 3485.88            |
| A_68_P32036088 | chr19:26681356-26681400                           | NM_011416:1729     | Smarca2    | INSIDE                 | 0.182                                                        | 13.709                         | 697.21             | 9557.84            | 2.501                          | 610.17             | 1526.28            |
| A_68_P32036078 | chr19:26680160-26680204                           | NM_011416:533      | Smarca2    | INSIDE                 | 0.324                                                        | 8.775                          | 608.78             | 5342.11            | 2.845                          | 560.40             | 1594.10            |
| A_68_P32036068 | chr19:26679131-26679177                           | NM_011416:-495     | Smarca2    | PROMOTER               | 0.552                                                        | 0.297                          | 2545.94            | 757.28             | 0.164                          | 1737.56            | 285.40             |
| A_68_P32036092 | chr19:26681843-26681887                           | NM_011416:2215     | Smarca2    | INSIDE                 | 0.642                                                        | 0.350                          | 2413.54            | 845.56             | 0.225                          | 1580.72            | 355.37             |
| A_68_P32036067 | chr19:26678985-26679030                           | NM_011416:-642     | Smarca2    | PROMOTER               | 0.651                                                        | 0.253                          | 3581.52            | 906.17             | 0.165                          | 2378.11            | 391.54             |
| A_68_P32036081 | chr19:26680484-26680528                           | NM_011416:857      | Smarca2    | INSIDE                 | 0.434                                                        | 0.592                          | 1557.75            | 922.16             | 0.257                          | 1328.34            | 341.65             |
| A_68_P32036079 | chr19:26680265-26680310                           | NM_011416:638      | Smarca2    | INSIDE                 | 0.596                                                        | 2.477                          | 2011.24            | 4981.15            | 1.475                          | 1656.17            | 2443.24            |
| A_68_P26348417 | chr9:21490581-21490625                            | NM_001174078:69990 | Smarca4    | INSIDE                 | 0.356                                                        | 5.168                          | 2468.09            | 12756.14           | 1.841                          | 1940.26            | 3572.85            |
| A_68_P27259388 | chr10:75383953-75383997                           | NM_001161853:385   | Smarca1    | INSIDE                 | 0.486                                                        | 3.775                          | 838.93             | 3167.39            | 1.834                          | 723.20             | 1326.31            |
| A_68_P27541473 | chr10:127896021-127896065                         | NM_001114096:-249  | Smarca2    | PROMOTER               | 0.649                                                        | 2.443                          | 1830.66            | 4472.31            | 1.586                          | 1519.34            | 2410.26            |
| A_68_P23542997 | chr5:24110453-24110497                            | NM_025891:-2654    | Smarca3    | PROMOTER               | 0.384                                                        | 0.463                          | 1175.02            | 544.18             | 0.178                          | 955.91             | 170.11             |

| ProbeName      | Target position of probe on CpG island microarray | TargetID          | GeneSymbol | CpG island Description | Ratio of relative methylation (TiO <sub>2</sub> -NP/Vehicle) | Sham group                     |                    |                    | TiO <sub>2</sub> -H group      |                    |                    |
|----------------|---------------------------------------------------|-------------------|------------|------------------------|--------------------------------------------------------------|--------------------------------|--------------------|--------------------|--------------------------------|--------------------|--------------------|
|                |                                                   |                   |            |                        |                                                              | Relative methylation (Cy5/Cy3) | Cy3 signal (Input) | Cy5 signal (MeDIP) | Relative methylation (Cy5/Cy3) | Cy3 signal (Input) | Cy5 signal (MeDIP) |
| A_68_P23542998 | chr5:24110558-24110602                            | NM_025891:-2760   | Smardc3    | PROMOTER               | 0.433                                                        | 16.460                         | 4308.31            | 70915.24           | 7.132                          | 4900.85            | 34954.33           |
| A_68_P23542977 | chr5:24108129-24108173                            | NM_025891:-330    | Smardc3    | PROMOTER               | 0.61                                                         | 3.314                          | 4069.30            | 13486.67           | 2.022                          | 2945.29            | 5956.21            |
| A_68_P28237421 | chr12:11273151-11273195                           | NM_025695:481     | Smc6       | INSIDE                 | 0.187                                                        | 13.777                         | 939.08             | 12937.77           | 2.581                          | 943.87             | 2435.93            |
| A_68_P28237417 | chr12:11272676-11272720                           | NM_025695:7       | Smc6       | INSIDE                 | 0.59                                                         | 0.434                          | 1822.24            | 790.67             | 0.256                          | 1312.19            | 335.82             |
| A_68_P30370941 | chr15:80064556-80064600                           | NM_178719:69      | Smcr71     | INSIDE                 | 0.645                                                        | 0.343                          | 5045.16            | 1728.90            | 0.221                          | 3632.03            | 802.34             |
| A_68_P28685879 | chr12:102321594-102321638                         | NM_001160214:296  | Smek1      | INSIDE                 | 0.385                                                        | 4.288                          | 1968.83            | 8442.53            | 1.651                          | 1570.20            | 2592.04            |
| A_68_P28685877 | chr12:102321356-102321400                         | NM_001160214:534  | Smek1      | INSIDE                 | 0.396                                                        | 1.767                          | 3537.25            | 6249.12            | 0.7                            | 2796.17            | 1957.22            |
| A_68_P25457391 | chr7:125387085-125387129                          | NM_001031814:45   | Smg1       | INSIDE                 | 0.331                                                        | 13.966                         | 12638.80           | 176516.30          | 4.628                          | 12475.46           | 57736.43           |
| A_68_P27923261 | chr11:74739468-74739512                           | NM_001002764:117  | Smg6       | INSIDE                 | 0.456                                                        | 0.358                          | 1305.44            | 467.21             | 0.163                          | 1051.23            | 171.40             |
| A_68_P20723679 | chr1:154749232-154749276                          | NM_001005507:522  | Smg7       | INSIDE                 | 0.202                                                        | 2.179                          | 4550.42            | 9913.49            | 0.441                          | 3436.92            | 1513.98            |
| A_68_P20723682 | chr1:154749623-154749667                          | NM_001005507:132  | Smg7       | INSIDE                 | 0.346                                                        | 0.501                          | 1162.33            | 582.07             | 0.173                          | 1004.07            | 173.85             |
| A_68_P20723684 | chr1:154750088-154750132                          | NM_001005507:-334 | Smg7       | PROMOTER               | 0.64                                                         | 4.347                          | 1157.82            | 5033.32            | 2.781                          | 1103.91            | 3070.25            |
| A_68_P32182255 | chr19:53465351-53465395                           | NM_172429:-309    | Smndc1     | PROMOTER               | 0.603                                                        | 0.729                          | 1885.30            | 1374.76            | 0.439                          | 1204.91            | 529.54             |
| A_68_P32182251 | chr19:53464993-53465037                           | NM_172429:49      | Smndc1     | INSIDE                 | 0.602                                                        | 0.664                          | 1164.91            | 773.16             | 0.4                            | 843.53             | 337.14             |
| A_68_P24328142 | chr6:29685305-29685349                            | NM_176996:-170    | Smo        | PROMOTER               | 0.207                                                        | 22.318                         | 2834.26            | 63256.23           | 4.628                          | 3526.71            | 16322.13           |
| A_68_P24328151 | chr6:29686313-29686357                            | NM_176996:838     | Smo        | INSIDE                 | 0.33                                                         | 0.667                          | 1588.49            | 1059.44            | 0.22                           | 1205.12            | 265.19             |
| A_68_P31058946 | chr17:14416584-14416628                           | NM_022315:94      | Smoc2      | INSIDE                 | 0.516                                                        | 0.379                          | 1740.50            | 660.48             | 0.196                          | 1364.69            | 267.17             |
| A_68_P31058947 | chr17:14416697-14416741                           | NM_022315:206     | Smoc2      | INSIDE                 | 0.598                                                        | 2.779                          | 1752.62            | 4871.34            | 1.663                          | 1452.33            | 2415.80            |
| A_68_P31058955 | chr17:14417592-14417636                           | NM_022315:1102    | Smoc2      | INSIDE                 | 0.642                                                        | 2.425                          | 1610.56            | 3905.96            | 1.556                          | 1433.62            | 2230.55            |
| A_68_P21635209 | chr2:131317684-131317728                          | NM_001177833:109  | Smox       | INSIDE                 | 0.306                                                        | 20.198                         | 1795.54            | 36266.77           | 6.179                          | 1686.77            | 10422.75           |
| A_68_P21635215 | chr2:131318208-131318252                          | NM_001177833:633  | Smox       | INSIDE                 | 0.592                                                        | 2.859                          | 1518.29            | 4340.50            | 1.692                          | 1257.46            | 2127.77            |
| A_68_P30574719 | chr16:17619415-17619459                           | NM_001164609:-10  | Smpd4      | PROMOTER               | 0.452                                                        | 6.782                          | 1075.21            | 7292.30            | 3.066                          | 1004.04            | 3078.56            |
| A_68_P32766765 | chrX:153929388-153929432                          | NM_009214:568     | Sms        | INSIDE                 | 0.072                                                        | 79.600                         | 1452.53            | 115620.40          | 5.755                          | 1320.61            | 7599.69            |
| A_68_P32766772 | chrX:153930279-153930323                          | NM_009214:-322    | Sms        | PROMOTER               | 0.232                                                        | 13.436                         | 666.61             | 8956.81            | 3.12                           | 845.01             | 2636.47            |
| A_68_P32766764 | chrX:153929309-153929353                          | NM_009214:648     | Sms        | INSIDE                 | 0.297                                                        | 12.292                         | 1197.81            | 14723.36           | 3.645                          | 1439.66            | 5247.86            |
| A_68_P27552578 | chr11:3435772-3435816                             | NM_001159284:3501 | Smtn       | INSIDE                 | 0.642                                                        | 2.838                          | 1078.60            | 3060.70            | 1.822                          | 945.63             | 1722.56            |
| A_68_P27911313 | chr11:72224759-72224803                           | NM_177776:435     | Smtn2      | INSIDE                 | 0.361                                                        | 0.375                          | 1718.11            | 643.49             | 0.135                          | 1289.82            | 174.22             |
| A_68_P27911318 | chr11:72225271-72225315                           | NM_177776:-77     | Smtn2      | PROMOTER               | 0.614                                                        | 0.588                          | 2818.73            | 1656.50            | 0.361                          | 2277.54            | 821.31             |
| A_68_P27911312 | chr11:72224674-72224718                           | NM_177776:519     | Smtn2      | INSIDE                 | 0.516                                                        | 1.385                          | 5723.61            | 7927.76            | 0.714                          | 4039.92            | 2885.46            |
| A_68_P22858652 | chr4:40704660-40704704                            | NM_021535:236     | Smu1       | INSIDE                 | 0.612                                                        | 0.424                          | 2922.73            | 1238.01            | 0.259                          | 2249.20            | 583.30             |
| A_68_P30502555 | chr15:102999581-102999625                         | NM_027885:-5887   | Smug1      | PROMOTER               | 0.607                                                        | 0.312                          | 3774.05            | 1176.01            | 0.189                          | 2638.36            | 498.73             |
| A_68_P20929009 | chr1:191745833-191745877                          | NM_026796:313     | Smyd2      | INSIDE                 | 0.588                                                        | 0.498                          | 966.61             | 481.33             | 0.293                          | 740.30             | 216.73             |
| A_68_P20870658 | chr1:181448224-181448272                          | NM_027188:-114    | Smyd3      | PROMOTER               | 0.386                                                        | 7.518                          | 403.41             | 3032.77            | 2.899                          | 401.11             | 1162.83            |
| A_68_P24604962 | chr6:85381989-85382033                            | NM_144918:41      | Smyd5      | INSIDE                 | 0.242                                                        | 0.435                          | 7225.66            | 3144.00            | 0.105                          | 4966.28            | 522.38             |
| A_68_P21836028 | chr2:167364137-167364181                          | NM_011427:432     | Snai1      | INSIDE                 | 0.081                                                        | 5.602                          | 5151.27            | 28856.89           | 0.451                          | 3904.21            | 1761.31            |
| A_68_P21836027 | chr2:167363971-167364015                          | NM_011427:266     | Snai1      | INSIDE                 | 0.179                                                        | 0.581                          | 2127.20            | 1235.05            | 0.104                          | 1734.31            | 179.91             |
| A_68_P21836025 | chr2:167363730-167363774                          | NM_011427:26      | Snai1      | INSIDE                 | 0.539                                                        | 3.881                          | 1853.76            | 7195.30            | 2.094                          | 1431.63            | 2997.72            |
| A_68_P30573672 | chr16:17405621-17405665                           | NM_023348:-450    | Snap29     | PROMOTER               | 0.213                                                        | 0.384                          | 3505.04            | 1346.68            | 0.082                          | 2288.37            | 186.98             |
| A_68_P30573671 | chr16:17405548-17405592                           | NM_023348:-522    | Snap29     | PROMOTER               | 0.521                                                        | 0.362                          | 12618.44           | 4569.64            | 0.189                          | 8101.82            | 1529.92            |
| A_68_P26701864 | chr9:86774762-86774806                            | NM_013669:423     | Snap91     | INSIDE                 | 0.53                                                         | 4.604                          | 2650.91            | 12204.73           | 2.442                          | 2135.65            | 5215.77            |
| A_68_P26701866 | chr9:86774905-86774949                            | NM_013669:281     | Snap91     | INSIDE                 | 0.535                                                        | 5.006                          | 2058.87            | 1041.19            | 0.271                          | 1509.81            | 408.48             |
| A_68_P25616848 | chr8:4253392-4253436                              | NM_133968:313     | Snapc2     | INSIDE                 | 0.658                                                        | 0.552                          | 6601.73            | 3644.66            | 0.363                          | 4322.41            | 1571.18            |
| A_68_P21078285 | chr2:26236006-26236050                            | NM_172339:145     | Snapc4     | INSIDE                 | 0.555                                                        | 5.818                          | 4068.14            | 23670.15           | 3.23                           | 3519.84            | 11368.40           |
| A_68_P26580558 | chr9:64027298-64027342                            | NM_183316:217     | Snapc5     | INSIDE                 | 0.134                                                        | 3.044                          | 3137.48            | 9549.74            | 0.407                          | 2343.71            | 954.67             |
| A_68_P31709379 | chr18:52927884-52927928                           | NM_001199154:109  | Snaip      | INSIDE                 | 0.528                                                        | 0.386                          | 3409.45            | 1316.33            | 0.204                          | 2717.88            | 554.13             |
| A_68_P29051301 | chr13:54867120-54867164                           | NM_033610:659     | Sneb       | INSIDE                 | 0.223                                                        | 11.149                         | 3002.74            | 33476.62           | 2.485                          | 2459.80            | 6113.32            |

| ProbeName      | Target position of probe on CpG island microarray | TargetID          | GeneSymbol | CpG island Description | Ratio of relative methylation (TiO <sub>2</sub> -NP/Vehicle) | Sham group                     |                    |                    | TiO <sub>2</sub> -H group      |                    |                    |
|----------------|---------------------------------------------------|-------------------|------------|------------------------|--------------------------------------------------------------|--------------------------------|--------------------|--------------------|--------------------------------|--------------------|--------------------|
|                |                                                   |                   |            |                        |                                                              | Relative methylation (Cy5/Cy3) | Cy3 signal (Input) | Cy5 signal (MeDIP) | Relative methylation (Cy5/Cy3) | Cy3 signal (Input) | Cy5 signal (MeDIP) |
| A_68_P24320419 | chr6:28430125-28430169                            | NM_019776:-201    | Snd1       | PROMOTER               | 0.158                                                        | 15.933                         | 1099.32            | 17515.59           | 2.52                           | 913.55             | 2302.59            |
| A_68_P28707014 | chr12:106270570-106270614                         | NR_003145:-103    | Shhg10     | DIVERGENT_PROMOTER     | 0.556                                                        | 5.347                          | 929.62             | 4970.50            | 2.971                          | 793.66             | 2358.17            |
| A_68_P23271975 | chr4:124744170-124744214                          | NM_175246:256     | Snip1      | INSIDE                 | 0.491                                                        | 0.354                          | 1525.28            | 540.26             | 0.174                          | 1257.49            | 218.92             |
| A_68_P30546007 | chr16:11066704-11066748                           | NM_009223:336     | Snn        | INSIDE                 | 0.524                                                        | 0.559                          | 2007.11            | 1122.01            | 0.293                          | 1578.33            | 462.07             |
| A_68_P30546005 | chr16:11066391-11066435                           | NM_009223:22      | Snn        | INSIDE                 | 0.453                                                        | 3.180                          | 1801.03            | 5727.97            | 1.441                          | 1430.35            | 2060.77            |
| A_68_P28052666 | chr11:97643069-97643113                           | NR_028078:-10     | Snora21    | PROMOTER               | 0.285                                                        | 14.773                         | 616.51             | 9108.00            | 4.207                          | 531.98             | 2238.10            |
| A_68_P22488493 | chr3:123211082-123211126                          | NR_028573:-120    | Snora24    | PROMOTER               | 0.666                                                        | 0.582                          | 1115.16            | 649.16             | 0.388                          | 905.49             | 350.90             |
| A_68_P23801182 | chr5:74489320-74489364                            | NR_031758:-212    | Snora26    | PROMOTER               | 0.523                                                        | 2.692                          | 2497.29            | 6723.24            | 1.407                          | 1993.42            | 2805.65            |
| A_68_P28744649 | chr12:112776399-112776444                         | NR_033168:-2735   | Snora28    | PROMOTER               | 0.53                                                         | 5.232                          | 8730.39            | 45678.01           | 2.774                          | 7630.71            | 21167.08           |
| A_68_P28744650 | chr12:112776572-112776616                         | NR_033168:-2562   | Snora28    | PROMOTER               | 0.656                                                        | 4.307                          | 1024.48            | 4412.95            | 2.828                          | 837.98             | 2369.67            |
| A_68_P25408486 | chr7:116662855-116662899                          | NR_028079:-769    | Snora3     | PROMOTER               | 0.314                                                        | 4.615                          | 2348.62            | 10839.78           | 1.448                          | 1996.36            | 2891.62            |
| A_68_P25588870 | chr7:148633634-148633678                          | NR_034049:-1075   | Snora52    | PROMOTER               | 0.527                                                        | 4.458                          | 6465.15            | 28821.91           | 2.349                          | 4454.11            | 10464.27           |
| A_68_P25362157 | chr7:106632148-106632192                          | NR_002172:-728    | Snord15a   | PROMOTER               | 0.471                                                        | 11.794                         | 561.47             | 6621.76            | 5.552                          | 490.09             | 2720.92            |
| A_68_P25091293 | chr7:52383927-52383971                            | NR_000002:-1115   | Snord32a   | PROMOTER               | 0.281                                                        | 0.322                          | 2829.31            | 909.74             | 0.09                           | 1895.64            | 171.39             |
| A_68_P23232782 | chr4:116828713-116828757                          | NR_030704:-281    | Snord55    | PROMOTER               | 0.34                                                         | 9.572                          | 511.10             | 4892.19            | 3.25                           | 398.17             | 1294.26            |
| A_68_P20411724 | chr1:88255322-88255366                            | NR_002851:-2442   | Snord82    | PROMOTER               | 0.474                                                        | 9.423                          | 1536.45            | 14477.65           | 4.465                          | 1451.30            | 6480.35            |
| A_68_P20024912 | chr1:9934064-9934108                              | NR_004410:-1462   | Snord87    | PROMOTER               | 0.428                                                        | 0.135                          | 3966.62            | 534.62             | 0.058                          | 3038.84            | 175.19             |
| A_68_P20024913 | chr1:9934160-9934204                              | NR_004410:-1558   | Snord87    | PROMOTER               | 0.651                                                        | 0.556                          | 1117.95            | 621.59             | 0.362                          | 975.05             | 352.84             |
| A_68_P21745020 | chr2:151457975-151458019                          | NM_198214:273     | Snph       | INSIDE                 | 0.658                                                        | 6.586                          | 472.55             | 3112.25            | 4.334                          | 416.14             | 1803.38            |
| A_68_P26887498 | chr9:122026335-122026379                          | NM_001164572:-27  | Snrk       | PROMOTER               | 0.217                                                        | 11.597                         | 3141.76            | 36435.59           | 2.512                          | 2439.50            | 6128.63            |
| A_68_P26887499 | chr9:122026546-122026590                          | NM_001164572:185  | Snrk       | INSIDE                 | 0.537                                                        | 3.528                          | 972.93             | 3432.51            | 1.894                          | 919.55             | 1741.79            |
| A_68_P21612035 | chr2:127034187-127034231                          | NM_177214:69      | Snmp200    | INSIDE                 | 0.662                                                        | 0.718                          | 1313.49            | 943.06             | 0.475                          | 1072.77            | 509.89             |
| A_68_P25092755 | chr7:52631986-52632030                            | NM_009224:19009   | Snmp70     | INSIDE                 | 0.387                                                        | 10.824                         | 1130.96            | 12241.60           | 4.184                          | 773.33             | 3235.63            |
| A_68_P25092756 | chr7:52632188-52632232                            | NM_009224:18807   | Snmp70     | INSIDE                 | 0.66                                                         | 4.607                          | 1895.08            | 8731.55            | 3.043                          | 1598.42            | 4864.31            |
| A_68_P26142251 | chr8:109460182-109460226                          | NM_009229:555     | Sntb2      | INSIDE                 | 0.636                                                        | 2.321                          | 4107.32            | 9532.27            | 1.475                          | 3322.65            | 4900.66            |
| A_68_P20022051 | chr1:9290036-9290080                              | NM_027671:-247    | Sntg1      | PROMOTER               | 0.309                                                        | 5.622                          | 1717.99            | 9657.83            | 1.736                          | 1560.12            | 2707.92            |
| A_68_P28325482 | chr12:31058380-31058424                           | NM_172951:-162    | Sntg2      | PROMOTER               | 0.406                                                        | 0.499                          | 1556.86            | 776.31             | 0.202                          | 1105.56            | 223.58             |
| A_68_P26591323 | chr9:65972506-65972550                            | NM_019727:165     | Snx1       | INSIDE                 | 0.515                                                        | 5.208                          | 1288.16            | 6709.08            | 2.68                           | 1037.84            | 2781.87            |
| A_68_P28351016 | chr12:35731926-35731970                           | NM_001014973:88   | Snx13      | INSIDE                 | 0.425                                                        | 14.375                         | 1732.80            | 24908.32           | 6.108                          | 1509.54            | 9219.88            |
| A_68_P28351013 | chr12:35731615-35731659                           | NM_001014973:-224 | Snx13      | PROMOTER               | 0.473                                                        | 0.497                          | 1190.52            | 591.77             | 0.235                          | 988.09             | 232.41             |
| A_68_P26710064 | chr9:88333383-88333427                            | NM_172926:385     | Snx14      | INSIDE                 | 0.528                                                        | 3.570                          | 1707.29            | 6095.83            | 1.886                          | 1643.71            | 3099.45            |
| A_68_P23576986 | chr5:31495832-31495876                            | NM_153680:178     | Snx17      | INSIDE                 | 0.563                                                        | 3.205                          | 2302.97            | 7382.16            | 1.804                          | 1908.52            | 3443.58            |
| A_68_P26042151 | chr8:91151730-91151774                            | NM_027840:8275    | Snx20      | INSIDE                 | 0.441                                                        | 0.614                          | 850.77             | 522.22             | 0.271                          | 720.04             | 195.10             |
| A_68_P26591015 | chr9:65917041-65917085                            | NM_001025612:476  | Snx22      | INSIDE                 | 0.429                                                        | 9.475                          | 1279.96            | 12127.39           | 4.069                          | 1089.34            | 4432.06            |
| A_68_P22339767 | chr3:94386067-94386111                            | NM_029721:536     | Snx27      | INSIDE                 | 0.573                                                        | 0.425                          | 6518.14            | 2769.21            | 0.243                          | 5148.40            | 1253.51            |
| A_68_P22339768 | chr3:94386146-94386190                            | NM_029721:456     | Snx27      | INSIDE                 | 0.621                                                        | 0.202                          | 11436.09           | 2306.99            | 0.125                          | 7841.33            | 982.67             |
| A_68_P27095211 | chr10:42222280-42222324                           | NM_017472:443     | Snx3       | INSIDE                 | 0.299                                                        | 6.207                          | 1549.09            | 9615.81            | 1.856                          | 1410.44            | 2617.34            |
| A_68_P27095209 | chr10:42222002-42222046                           | NM_017472:165     | Snx3       | INSIDE                 | 0.566                                                        | 7.629                          | 1114.58            | 8502.80            | 4.318                          | 1004.25            | 4335.96            |
| A_68_P26539387 | chr9:56775942-56775986                            | NM_175483:214     | Snx33      | INSIDE                 | 0.453                                                        | 0.389                          | 1257.61            | 489.57             | 0.176                          | 958.00             | 168.78             |
| A_68_P30656969 | chr16:33251415-33251459                           | NM_080557:-105    | Snx4       | PROMOTER               | 0.408                                                        | 27.187                         | 2831.71            | 76986.63           | 11.095                         | 2881.85            | 31973.48           |
| A_68_P30656972 | chr16:33251779-33251823                           | NM_080557:259     | Snx4       | INSIDE                 | 0.552                                                        | 0.270                          | 1803.21            | 486.24             | 0.149                          | 1300.60            | 193.66             |
| A_68_P28449264 | chr12:55896516-55896560                           | NM_026998:111     | Snx6       | INSIDE                 | 0.616                                                        | 9.543                          | 1283.44            | 12247.70           | 5.882                          | 1078.64            | 6344.10            |
| A_68_P24141205 | chr5:140865282-140865326                          | NM_172277:-103    | Snx8       | PROMOTER               | 0.216                                                        | 23.637                         | 9783.02            | 231241.60          | 5.098                          | 9897.74            | 50457.56           |
| A_68_P31019379 | chr17:5841808-5841852                             | NM_025664:451     | Snx9       | INSIDE                 | 0.461                                                        | 4.417                          | 1491.23            | 6586.62            | 2.038                          | 1390.78            | 2834.36            |
| A_68_P27098030 | chr10:42741219-42741263                           | NM_175407:153096  | Sobp       | INSIDE                 | 0.48                                                         | 8.160                          | 373.08             | 3044.23            | 3.915                          | 410.64             | 1607.62            |
| A_68_P27098028 | chr10:42740979-42741023                           | NM_175407:153336  | Sobp       | INSIDE                 | 0.533                                                        | 0.401                          | 3043.00            | 1219.42            | 0.214                          | 2287.09            | 488.48             |

| ProbeName      | Target position of probe on CpG island microarray | TargetID          | GeneSymbol | CpG island Description | Ratio of relative methylation (TiO <sub>2</sub> -NP/Vehicle) | Sham group                     |                    |                    | TiO <sub>2</sub> -H group      |                    |                    |
|----------------|---------------------------------------------------|-------------------|------------|------------------------|--------------------------------------------------------------|--------------------------------|--------------------|--------------------|--------------------------------|--------------------|--------------------|
|                |                                                   |                   |            |                        |                                                              | Relative methylation (Cy5/Cy3) | Cy3 signal (Input) | Cy5 signal (MeDIP) | Relative methylation (Cy5/Cy3) | Cy3 signal (Input) | Cy5 signal (MeDIP) |
| A_68_P27099065 | chr10:42894301-42894345                           | NM_175407:14      | Sobp       | INSIDE                 | 0.633                                                        | 6.909                          | 3896.52            | 26921.78           | 4.374                          | 2963.48            | 12961.24           |
| A_68_P27099056 | chr10:42893322-42893366                           | NM_175407:992     | Sobp       | INSIDE                 | 0.549                                                        | 0.606                          | 1859.35            | 1127.59            | 0.333                          | 1411.93            | 469.73             |
| A_68_P30544459 | chr16:10785615-10785659                           | NM_009896:-7      | Socs1      | PROMOTER               | 0.203                                                        | 19.143                         | 3039.73            | 58189.53           | 3.89                           | 3625.07            | 14101.38           |
| A_68_P30544453 | chr16:10785046-10785090                           | NM_009896:561     | Socs1      | INSIDE                 | 0.589                                                        | 0.449                          | 2679.68            | 1204.06            | 0.265                          | 1935.07            | 511.90             |
| A_68_P30544457 | chr16:10785415-10785459                           | NM_009896:193     | Socs1      | INSIDE                 | 0.61                                                         | 0.332                          | 2828.04            | 938.03             | 0.202                          | 2170.50            | 439.04             |
| A_68_P27365029 | chr10:94878409-94878453                           | NM_001168656:-312 | Socs2      | PROMOTER               | 0.223                                                        | 13.181                         | 1245.41            | 16415.86           | 2.94                           | 1039.55            | 3056.69            |
| A_68_P27365030 | chr10:94878524-94878568                           | NM_001168656:-428 | Socs2      | PROMOTER               | 0.373                                                        | 6.560                          | 1093.33            | 7172.50            | 2.445                          | 934.54             | 2285.36            |
| A_68_P27365031 | chr10:94878605-94878649                           | NM_001168656:-508 | Socs2      | PROMOTER               | 0.382                                                        | 4.964                          | 1939.45            | 9626.72            | 1.895                          | 1727.76            | 3274.51            |
| A_68_P27365028 | chr10:94878277-94878321                           | NM_001168656:-180 | Socs2      | PROMOTER               | 0.579                                                        | 0.582                          | 848.29             | 493.84             | 0.337                          | 687.89             | 231.95             |
| A_68_P31421198 | chr17:87506616-87506660                           | NM_019654:-380    | Socs5      | PROMOTER               | 0.521                                                        | 0.733                          | 2296.38            | 1683.06            | 0.382                          | 1712.39            | 653.32             |
| A_68_P28050117 | chr11:97224316-97224360                           | NM_138657:474     | Socs7      | INSIDE                 | 0.375                                                        | 0.426                          | 1441.96            | 614.45             | 0.16                           | 1079.91            | 172.56             |
| A_68_P28050112 | chr11:97223519-97223563                           | NM_138657:-324    | Socs7      | PROMOTER               | 0.663                                                        | 3.264                          | 1124.23            | 3669.05            | 2.163                          | 967.33             | 2091.97            |
| A_68_P28050120 | chr11:97224658-97224702                           | NM_138657:816     | Socs7      | INSIDE                 | 0.619                                                        | 0.580                          | 1565.12            | 908.08             | 0.359                          | 1240.45            | 445.47             |
| A_68_P31054932 | chr17:13200778-13200822                           | NM_013671:96      | Sod2       | INSIDE                 | 0.431                                                        | 7.803                          | 1330.80            | 10383.88           | 3.362                          | 1191.45            | 4006.21            |
| A_68_P29699987 | chr14:70606016-70606060                           | NM_011366:1406    | Sorbs3     | INSIDE                 | 0.175                                                        | 21.525                         | 2530.59            | 54470.58           | 3.761                          | 2066.87            | 7774.50            |
| A_68_P29699985 | chr14:70591939-70591983                           | NM_011366:15484   | Sorbs3     | INSIDE                 | 0.609                                                        | 0.527                          | 1143.35            | 602.40             | 0.321                          | 769.27             | 246.75             |
| A_68_P32168785 | chr19:50752526-50752570                           | NM_021377:554     | Sorcs1     | INSIDE                 | 0.443                                                        | 14.019                         | 4391.82            | 61569.29           | 6.216                          | 3649.68            | 22687.58           |
| A_68_P32168786 | chr19:50752601-50752645                           | NM_021377:480     | Sorcs1     | INSIDE                 | 0.542                                                        | 0.425                          | 1670.57            | 710.31             | 0.23                           | 1201.36            | 276.82             |
| A_68_P23607369 | chr5:36740782-36740826                            | NM_030889:-16     | Sorcs2     | PROMOTER               | 0.381                                                        | 15.471                         | 5117.20            | 79169.25           | 5.891                          | 4123.64            | 24290.65           |
| A_68_P22411695 | chr3:108086638-108086682                          | NM_019972:-389    | Sort1      | PROMOTER               | 0.557                                                        | 19.733                         | 3612.14            | 71278.76           | 11.001                         | 2622.22            | 28845.93           |
| A_68_P31383417 | chr17:80882569-80882613                           | NM_009231:-2797   | Sos1       | PROMOTER               | 0.322                                                        | 0.626                          | 1303.49            | 815.46             | 0.202                          | 952.58             | 191.98             |
| A_68_P28515845 | chr12:70782400-70782444                           | NM_001135559:417  | Sos2       | INSIDE                 | 0.34                                                         | 6.612                          | 1440.51            | 9525.15            | 2.248                          | 1675.07            | 3766.11            |
| A_68_P28357647 | chr12:37043910-37043954                           | NM_025312:3177    | Sostdcl    | INSIDE                 | 0.547                                                        | 0.697                          | 1698.83            | 1183.92            | 0.381                          | 1316.72            | 502.17             |
| A_68_P25661260 | chr8:12397084-12397128                            | NM_009233:1588    | Sox1       | INSIDE                 | 0.27                                                         | 1.810                          | 2602.44            | 4710.81            | 0.489                          | 2121.75            | 1038.07            |
| A_68_P25661253 | chr8:12396004-12396049                            | NM_009233:508     | Sox1       | INSIDE                 | 0.41                                                         | 0.342                          | 2027.52            | 693.03             | 0.14                           | 1660.66            | 232.48             |
| A_68_P30364761 | chr15:78993943-78993987                           | NM_011437:956     | Sox10      | INSIDE                 | 0.55                                                         | 2.593                          | 1913.59            | 4961.26            | 1.426                          | 1604.39            | 2287.73            |
| A_68_P28307263 | chr12:28027320-28027364                           | NM_009234:241     | Sox11      | INSIDE                 | 0.156                                                        | 103.203                        | 3259.87            | 336428.00          | 16.093                         | 3150.51            | 50700.29           |
| A_68_P28307270 | chr12:28028339-28028383                           | NM_009234:-777    | Sox11      | PROMOTER               | 0.342                                                        | 5.657                          | 4899.40            | 27717.95           | 1.934                          | 3744.01            | 7242.26            |
| A_68_P28307255 | chr12:28026369-28026413                           | NM_009234:1193    | Sox11      | INSIDE                 | 0.661                                                        | 3.332                          | 1641.80            | 5470.89            | 2.204                          | 1388.04            | 3059.62            |
| A_68_P28307233 | chr12:28023729-28023773                           | NM_009234:3833    | Sox11      | INSIDE                 | 0.214                                                        | 6.879                          | 2093.01            | 14397.38           | 1.474                          | 1637.57            | 2414.18            |
| A_68_P21749123 | chr2:152223588-152223632                          | NM_011438:172     | Sox12      | INSIDE                 | 0.393                                                        | 5.835                          | 1739.99            | 10152.56           | 2.291                          | 1548.22            | 3547.68            |
| A_68_P26766649 | chr9:99775472-99775516                            | NM_011440:1095    | Sox14      | INSIDE                 | 0.206                                                        | 2.567                          | 3598.45            | 9235.58            | 0.529                          | 2666.34            | 1411.62            |
| A_68_P26766650 | chr9:99775559-99775603                            | NM_011440:1009    | Sox14      | INSIDE                 | 0.61                                                         | 0.464                          | 2068.85            | 959.84             | 0.283                          | 1665.96            | 471.59             |
| A_68_P26766660 | chr9:99776718-99776762                            | NM_011440:-151    | Sox14      | PROMOTER               | 0.644                                                        | 0.416                          | 1413.09            | 587.69             | 0.268                          | 1250.45            | 334.78             |
| A_68_P20005810 | chr1:4483711-4483755                              | NM_011441:2762    | Sox17      | INSIDE                 | 0.32                                                         | 13.492                         | 885.17             | 11943.04           | 4.32                           | 857.33             | 3703.58            |
| A_68_P22049386 | chr3:34548677-34548721                            | NM_011443:-228    | Sox2       | PROMOTER               | 0.352                                                        | 5.555                          | 2691.89            | 14952.66           | 1.958                          | 2182.76            | 4273.41            |
| A_68_P22049390 | chr3:34549137-34549181                            | NM_011443:232     | Sox2       | INSIDE                 | 0.593                                                        | 0.378                          | 2625.88            | 992.93             | 0.224                          | 1939.84            | 434.88             |
| A_68_P22049387 | chr3:34548813-34548857                            | NM_011443:-92     | Sox2       | PROMOTER               | 0.652                                                        | 3.744                          | 1580.98            | 5919.50            | 2.442                          | 1304.64            | 3185.36            |
| A_68_P22049376 | chr3:34547722-34547766                            | NM_011443:-1182   | Sox2       | PROMOTER               | 0.501                                                        | 0.686                          | 1624.65            | 1114.27            | 0.344                          | 1262.60            | 434.06             |
| A_68_P22049395 | chr3:34549827-34549871                            | NM_011443:922     | Sox2       | INSIDE                 | 0.419                                                        | 0.612                          | 1064.82            | 651.41             | 0.256                          | 839.42             | 214.94             |
| A_68_P29937469 | chr14:118633887-118633936                         | NM_177753:2341    | Sox21      | INSIDE                 | 0.587                                                        | 5.995                          | 503.43             | 3018.09            | 3.52                           | 437.99             | 1541.65            |
| A_68_P29937483 | chr14:118635646-118635690                         | NM_177753:584     | Sox21      | INSIDE                 | 0.611                                                        | 0.327                          | 2353.72            | 770.23             | 0.2                            | 1733.91            | 346.63             |
| A_68_P32415817 | chrX:58147657-58147701                            | NM_009237:-1073   | Sox3       | PROMOTER               | 0.396                                                        | 10.797                         | 998.49             | 10780.88           | 4.275                          | 942.82             | 4030.79            |
| A_68_P32415805 | chrX:58146252-58146296                            | NM_009237:331     | Sox3       | INSIDE                 | 0.569                                                        | 3.555                          | 752.86             | 2676.58            | 2.023                          | 957.38             | 1937.19            |
| A_68_P28909030 | chr13:29051600-29051644                           | NM_009238:-6071   | Sox4       | PROMOTER               | 0.26                                                         | 12.007                         | 3531.25            | 42401.00           | 3.125                          | 2709.29            | 8466.92            |
| A_68_P28908966 | chr13:29044288-29044332                           | NM_009238:1241    | Sox4       | INSIDE                 | 0.4                                                          | 8.519                          | 2096.89            | 17864.26           | 3.411                          | 1944.60            | 6633.73            |



| ProbeName      | Target position of probe on CpG island microarray | TargetID            | GeneSymbol | CpG island Description | Ratio of relative methylation (TiO <sub>2</sub> -NP/Vehicle) | Sham group                     |                    |                    | TiO <sub>2</sub> -H group      |                    |                    |
|----------------|---------------------------------------------------|---------------------|------------|------------------------|--------------------------------------------------------------|--------------------------------|--------------------|--------------------|--------------------------------|--------------------|--------------------|
|                |                                                   |                     |            |                        |                                                              | Relative methylation (Cy5/Cy3) | Cy3 signal (Input) | Cy5 signal (MeDIP) | Relative methylation (Cy5/Cy3) | Cy3 signal (Input) | Cy5 signal (MeDIP) |
| A_68_P28908970 | chr13:29044714-29044758                           | NM_009238:815       | Sox4       | INSIDE                 | 0.343                                                        | 0.634                          | 1008.27            | 639.16             | 0.217                          | 796.77             | 173.19             |
| A_68_P24912678 | chr6:143782013-143782057                          | NM_001113559:376044 | Sox5       | INSIDE                 | 0.382                                                        | 5.597                          | 1547.89            | 8663.64            | 2.138                          | 1251.56            | 2676.23            |
| A_68_P25445817 | chr7:123177303-123177347                          | NM_001025560:-2763  | Sox6       | PROMOTER               | 0.248                                                        | 12.802                         | 2651.77            | 33948.16           | 3.171                          | 2843.58            | 9017.24            |
| A_68_P25445803 | chr7:123175462-123175506                          | NM_001025560:-923   | Sox6       | PROMOTER               | 0.61                                                         | 0.687                          | 1410.28            | 969.42             | 0.419                          | 1211.72            | 508.01             |
| A_68_P29664626 | chr14:64562881-64562925                           | NM_011446:360       | Sox7       | INSIDE                 | 0.403                                                        | 7.142                          | 1803.76            | 12882.79           | 2.881                          | 1423.64            | 4101.32            |
| A_68_P31104792 | chr17:25707704-25707748                           | NM_011447:-95       | Sox8       | DIVERGENT_PROMOTER     | 0.412                                                        | 14.886                         | 1392.61            | 20730.61           | 6.131                          | 1551.40            | 9512.24            |
| A_68_P28137828 | chr11:112643707-112643751                         | NM_011448:205       | Sox9       | INSIDE                 | 0.386                                                        | 7.846                          | 3446.36            | 27040.08           | 3.029                          | 2836.24            | 8590.64            |
| A_68_P28137844 | chr11:112645388-112645432                         | NM_011448:1887      | Sox9       | INSIDE                 | 0.554                                                        | 0.264                          | 1723.84            | 455.79             | 0.146                          | 1270.92            | 186.03             |
| A_68_P28137853 | chr11:112646459-112646503                         | NM_011448:2957      | Sox9       | INSIDE                 | 0.637                                                        | 0.396                          | 6314.11            | 2500.50            | 0.252                          | 4360.43            | 1100.54            |
| A_68_P28137856 | chr11:112646719-112646763                         | NM_011448:3217      | Sox9       | INSIDE                 | 0.351                                                        | 0.630                          | 5261.07            | 3314.66            | 0.221                          | 3892.09            | 861.02             |
| A_68_P21328883 | chr2:72818359-72818403                            | NM_001098425:-1042  | Sp3        | PROMOTER               | 0.308                                                        | 8.933                          | 32205.15           | 287680.70          | 2.754                          | 32382.12           | 89188.84           |
| A_68_P21328888 | chr2:72818835-72818879                            | NM_001018042:-353   | Sp3        | PROMOTER               | 0.614                                                        | 2.612                          | 854.11             | 2230.59            | 1.605                          | 781.34             | 1253.86            |
| A_68_P28778756 | chr12:119539812-119539856                         | NM_001166385:79     | Sp4        | INSIDE                 | 0.251                                                        | 0.535                          | 1618.47            | 865.55             | 0.134                          | 1259.85            | 169.29             |
| A_68_P28778754 | chr12:119539626-119539670                         | NM_001166385:265    | Sp4        | INSIDE                 | 0.391                                                        | 5.206                          | 5877.59            | 30597.97           | 2.034                          | 3981.67            | 8098.09            |
| A_68_P28048173 | chr11:96879906-96879950                           | NM_031183:5046      | Sp6        | INSIDE                 | 0.212                                                        | 38.177                         | 4626.93            | 176640.20          | 8.078                          | 4093.57            | 33069.18           |
| A_68_P30497455 | chr15:102189021-102189065                         | NM_130458:7660      | Sp7        | INSIDE                 | 0.479                                                        | 0.625                          | 1051.32            | 656.60             | 0.299                          | 838.98             | 250.76             |
| A_68_P28781893 | chr12:120087514-120087558                         | NM_177082:2735      | Sp8        | INSIDE                 | 0.312                                                        | 18.501                         | 2059.05            | 38094.48           | 5.772                          | 1767.06            | 10199.17           |
| A_68_P28781792 | chr12:120075230-120075274                         | NM_177082:-9549     | Sp8        | PROMOTER               | 0.385                                                        | 6.190                          | 3647.18            | 22574.69           | 2.384                          | 3375.21            | 8047.28            |
| A_68_P28781896 | chr12:120087840-120087884                         | NM_177082:3061      | Sp8        | INSIDE                 | 0.574                                                        | 5.137                          | 1586.31            | 8148.51            | 2.946                          | 1331.88            | 3924.24            |
| A_68_P28781791 | chr12:120075046-120075090                         | NM_177082:-9733     | Sp8        | PROMOTER               | 0.575                                                        | 2.873                          | 2502.06            | 7189.62            | 1.653                          | 2156.18            | 3565.15            |
| A_68_P21330556 | chr2:73115402-73115446                            | NM_001005343:5442   | Sp9        | DOWNSTREAM             | 0.542                                                        | 7.338                          | 4678.20            | 34327.20           | 3.98                           | 3886.55            | 15466.91           |
| A_68_P21330519 | chr2:73111290-73111334                            | NM_001005343:1330   | Sp9        | INSIDE                 | 0.563                                                        | 0.348                          | 2147.04            | 748.19             | 0.196                          | 1601.39            | 314.39             |
| A_68_P21330530 | chr2:73112578-73112622                            | NM_001005343:2618   | Sp9        | INSIDE                 | 0.332                                                        | 0.549                          | 1097.63            | 602.89             | 0.183                          | 941.29             | 171.83             |
| A_68_P30137263 | chr15:36140403-36140447                           | NM_012031:31140     | Spag1      | INSIDE                 | 0.482                                                        | 8.408                          | 1790.19            | 15052.41           | 4.053                          | 1408.04            | 5707.29            |
| A_68_P21769255 | chr2:155891652-155891696                          | NM_139151:726       | Spag4      | INSIDE                 | 0.615                                                        | 0.535                          | 1774.69            | 949.27             | 0.329                          | 1421.86            | 467.60             |
| A_68_P27942521 | chr11:78115275-78115319                           | NM_017407:204       | Spag5      | INSIDE                 | 0.335                                                        | 16.766                         | 1771.39            | 29698.17           | 5.615                          | 1687.68            | 9476.14            |
| A_68_P27942517 | chr11:78114890-78114934                           | NM_017407:-180      | Spag5      | PROMOTER               | 0.533                                                        | 0.162                          | 3084.85            | 499.25             | 0.086                          | 2123.21            | 183.18             |
| A_68_P27942519 | chr11:78115075-78115119                           | NM_017407:4         | Spag5      | INSIDE                 | 0.228                                                        | 8.469                          | 1162.44            | 9844.94            | 1.93                           | 860.31             | 1660.03            |
| A_68_P31351023 | chr17:74738587-74738631                           | NM_001162870:282    | Spast      | INSIDE                 | 0.517                                                        | 7.640                          | 623.43             | 4763.15            | 3.952                          | 658.38             | 2601.62            |
| A_68_P22614971 | chr3:146162605-146162649                          | NM_027617:91        | Spata1     | INSIDE                 | 0.371                                                        | 6.845                          | 855.20             | 5853.87            | 2.542                          | 829.01             | 2107.13            |
| A_68_P21835810 | chr2:167318513-167318557                          | NM_170756:-160      | Spata2     | PROMOTER               | 0.599                                                        | 0.212                          | 2531.34            | 536.10             | 0.127                          | 1772.05            | 224.75             |
| A_68_P23212277 | chr4:111392547-111392591                          | NM_026470:-46       | Spata6     | PROMOTER               | 0.606                                                        | 0.574                          | 2706.61            | 1552.60            | 0.348                          | 2306.75            | 802.12             |
| A_68_P30478338 | chr15:98957605-98957662                           | NM_139140:358       | Spats2     | INSIDE                 | 0.286                                                        | 1.449                          | 1939.60            | 2811.39            | 0.414                          | 1398.25            | 579.14             |
| A_68_P30478336 | chr15:98957457-98957502                           | NM_139140:204       | Spats2     | INSIDE                 | 0.184                                                        | 3.312                          | 6359.01            | 21058.04           | 0.609                          | 4680.12            | 2850.94            |
| A_68_P21307670 | chr2:69044152-69044196                            | NM_001199123:73     | Spe25      | INSIDE                 | 0.465                                                        | 8.314                          | 1840.59            | 15302.46           | 3.869                          | 1557.52            | 6025.92            |
| A_68_P27851932 | chr11:61890556-61890600                           | NM_001029936:-20    | Specc1     | PROMOTER               | 0.432                                                        | 0.369                          | 1476.33            | 545.37             | 0.159                          | 1083.54            | 172.78             |
| A_68_P27851930 | chr11:61890326-61890370                           | NM_001029936:-250   | Specc1     | PROMOTER               | 0.618                                                        | 2.395                          | 7250.65            | 17368.42           | 1.479                          | 5633.34            | 8334.09            |
| A_68_P27851931 | chr11:61890435-61890479                           | NM_001029936:-142   | Specc1     | PROMOTER               | 0.158                                                        | 4.381                          | 3469.95            | 15203.14           | 0.694                          | 2141.83            | 1485.77            |
| A_68_P21633642 | chr2:130997305-130997349                          | NM_027641:3220      | Spefl1     | INSIDE                 | 0.444                                                        | 3.522                          | 1540.97            | 5427.74            | 1.562                          | 1232.85            | 1926.10            |
| A_68_P20353634 | chr1:75378425-75378469                            | NM_001085371:-242   | Speg       | PROMOTER               | 0.29                                                         | 0.453                          | 5876.43            | 2661.35            | 0.131                          | 3950.90            | 518.23             |
| A_68_P20353933 | chr1:75419052-75419096                            | NM_001085370:36890  | Speg       | INSIDE                 | 0.61                                                         | 0.489                          | 3269.59            | 1599.86            | 0.299                          | 2249.05            | 671.35             |
| A_68_P20353935 | chr1:75419232-75419276                            | NM_001085370:37070  | Speg       | INSIDE                 | 0.619                                                        | 0.457                          | 7924.28            | 3617.88            | 0.283                          | 5372.85            | 1518.28            |
| A_68_P20353688 | chr1:75385168-75385212                            | NM_001085370:3006   | Speg       | INSIDE                 | 0.347                                                        | 1.421                          | 1447.58            | 2056.59            | 0.494                          | 1195.13            | 589.92             |
| A_68_P23364649 | chr4:141094339-141094383                          | NM_019763:152       | Spen       | INSIDE                 | 0.647                                                        | 3.140                          | 2734.34            | 8586.71            | 2.031                          | 2255.10            | 4580.05            |
| A_68_P23364273 | chr4:141028839-141028883                          | NM_019763:65652     | Spen       | INSIDE                 | 0.493                                                        | 3.431                          | 2378.24            | 8158.90            | 1.693                          | 1733.72            | 2934.54            |
| A_68_P23364274 | chr4:141028926-141028970                          | NM_019763:65564     | Spen       | INSIDE                 | 0.51                                                         | 3.648                          | 887.46             | 3237.06            | 1.86                           | 682.78             | 1269.74            |

| ProbeName      | Target position of probe on CpG island microarray | TargetID           | GeneSymbol | CpG island Description | Ratio of relative methylation (TiO <sub>2</sub> -NP/Vehicle) | Sham group                     |                    |                    | TiO <sub>2</sub> -H group      |                    |                    |
|----------------|---------------------------------------------------|--------------------|------------|------------------------|--------------------------------------------------------------|--------------------------------|--------------------|--------------------|--------------------------------|--------------------|--------------------|
|                |                                                   |                    |            |                        |                                                              | Relative methylation (Cy5/Cy3) | Cy3 signal (Input) | Cy5 signal (MeDIP) | Relative methylation (Cy5/Cy3) | Cy3 signal (Input) | Cy5 signal (MeDIP) |
| A_68_P21584534 | chr2:121944006-121944050                          | NM_145531:94       | Spg11      | INSIDE                 | 0.54                                                         | 3.536                          | 671.89             | 2376.09            | 1.908                          | 588.62             | 1123.13            |
| A_68_P21584536 | chr2:121944215-121944259                          | NM_145531:-114     | Spg11      | PROMOTER               | 0.657                                                        | 2.137                          | 2817.11            | 6019.45            | 1.404                          | 2073.16            | 2910.78            |
| A_68_P21584533 | chr2:121943910-121943954                          | NM_145531:190      | Spg11      | INSIDE                 | 0.592                                                        | 2.835                          | 697.44             | 1977.49            | 1.679                          | 645.75             | 1084.01            |
| A_68_P26587800 | chr9:65308975-65309019                            | NM_138584:253      | Spg21      | INSIDE                 | 0.666                                                        | 6.458                          | 6488.78            | 41903.93           | 4.301                          | 4694.43            | 20192.73           |
| A_68_P28159847 | chr11:116392890-116392934                         | NM_001172475:-312  | Sphk1      | PROMOTER               | 0.543                                                        | 0.599                          | 1841.73            | 1103.25            | 0.325                          | 1391.64            | 452.77             |
| A_68_P21568536 | chr2:119063328-119063372                          | NM_016907:255      | Spint1     | INSIDE                 | 0.56                                                         | 3.173                          | 3403.62            | 10801.20           | 1.776                          | 2471.55            | 4390.22            |
| A_68_P21568538 | chr2:119063550-119063594                          | NM_016907:477      | Spint1     | INSIDE                 | 0.439                                                        | 0.550                          | 855.56             | 470.86             | 0.242                          | 709.67             | 171.53             |
| A_68_P25026344 | chr7:30066373-30066417                            | NM_001082548:602   | Spint2     | INSIDE                 | 0.43                                                         | 1.476                          | 5378.55            | 7937.48            | 0.634                          | 4274.11            | 2709.97            |
| A_68_P26239286 | chr8:125857009-125857053                          | NM_172287:418      | Spire2     | INSIDE                 | 0.342                                                        | 0.254                          | 2831.39            | 720.31             | 0.087                          | 2101.99            | 183.10             |
| A_68_P21100500 | chr2:29821292-29821336                            | NM_001076554:235   | Spna2      | INSIDE                 | 0.327                                                        | 17.872                         | 3160.10            | 56478.54           | 5.84                           | 2532.28            | 14788.68           |
| A_68_P21100496 | chr2:29820843-29820887                            | NM_001076554:-215  | Spna2      | PROMOTER               | 0.185                                                        | 8.876                          | 3243.39            | 28788.00           | 1.638                          | 2832.75            | 4639.45            |
| A_68_P28555624 | chr12:77810657-77810701                           | NM_013675:856      | Spcb1      | INSIDE                 | 0.345                                                        | 0.215                          | 3091.93            | 664.61             | 0.074                          | 2382.64            | 176.62             |
| A_68_P28554952 | chr12:77707425-77707469                           | NM_013675:104088   | Spcb1      | INSIDE                 | 0.633                                                        | 4.505                          | 1219.24            | 5492.35            | 2.851                          | 1089.76            | 3106.85            |
| A_68_P25017009 | chr7:28160497-28160541                            | NM_001199235:19007 | Spcb4      | INSIDE                 | 0.338                                                        | 5.690                          | 4048.84            | 23038.68           | 1.922                          | 3451.72            | 6635.78            |
| A_68_P25017170 | chr7:28193438-28193482                            | NM_032610:38148    | Spcb4      | INSIDE                 | 0.655                                                        | 5.502                          | 1770.19            | 9739.16            | 3.603                          | 1522.09            | 5484.83            |
| A_68_P25017007 | chr7:28160302-28160347                            | NM_001199235:19201 | Spcb4      | INSIDE                 | 0.327                                                        | 0.668                          | 1094.70            | 731.29             | 0.218                          | 792.26             | 172.80             |
| A_68_P25016939 | chr7:28149566-28149610                            | NM_001199235:29937 | Spcb4      | INSIDE                 | 0.563                                                        | 3.476                          | 873.82             | 3037.44            | 1.956                          | 778.34             | 1522.68            |
| A_68_P25500162 | chr7:133520602-133520646                          | NM_023712:824      | Spsn1      | INSIDE                 | 0.501                                                        | 4.614                          | 650.93             | 3003.24            | 2.31                           | 552.69             | 1276.81            |
| A_68_P27911818 | chr11:72302266-72302310                           | NM_153060:1118     | Spsn2      | INSIDE                 | 0.475                                                        | 0.443                          | 1103.11            | 488.43             | 0.21                           | 813.54             | 171.23             |
| A_68_P27911828 | chr11:72303091-72303135                           | NM_153060:294      | Spsn2      | INSIDE                 | 0.479                                                        | 3.577                          | 2827.95            | 10116.19           | 1.714                          | 2149.10            | 3684.30            |
| A_68_P24007303 | chr5:115460994-115461038                          | NM_029012:-516     | Spp13      | PROMOTER               | 0.373                                                        | 4.632                          | 1783.22            | 8259.04            | 1.728                          | 1456.82            | 2517.27            |
| A_68_P24603257 | chr6:85087734-85087778                            | NM_011467:2        | Spr        | INSIDE                 | 0.226                                                        | 0.526                          | 2042.05            | 1074.10            | 0.119                          | 1436.46            | 170.42             |
| A_68_P24603258 | chr6:85087813-85087857                            | NM_011467:-76      | Spr        | PROMOTER               | 0.411                                                        | 0.531                          | 1979.14            | 1050.64            | 0.218                          | 1366.14            | 298.30             |
| A_68_P21556049 | chr2:116946411-116946455                          | NM_033524:-753     | Spred1     | PROMOTER               | 0.131                                                        | 39.299                         | 5910.89            | 232290.90          | 5.147                          | 5771.43            | 29706.72           |
| A_68_P21556050 | chr2:116946481-116946525                          | NM_033524:-683     | Spred1     | PROMOTER               | 0.347                                                        | 7.810                          | 5392.71            | 42115.70           | 2.711                          | 4421.52            | 11985.30           |
| A_68_P27628926 | chr11:19825568-19825612                           | NM_033523:1146     | Spred2     | INSIDE                 | 0.47                                                         | 13.531                         | 1779.04            | 24072.84           | 6.356                          | 1431.38            | 9097.91            |
| A_68_P25025683 | chr7:29946879-29946923                            | NM_182927:6766     | Spred3     | INSIDE                 | 0.371                                                        | 4.861                          | 1180.76            | 5739.64            | 1.803                          | 997.07             | 1797.96            |
| A_68_P30496205 | chr15:101966489-101966533                         | NM_001033277:136   | Spryd3     | INSIDE                 | 0.462                                                        | 5.874                          | 3541.42            | 20800.60           | 2.711                          | 2869.16            | 7777.40            |
| A_68_P23403482 | chr4:149328861-149328905                          | NM_029035:233      | Spsb1      | INSIDE                 | 0.415                                                        | 1.394                          | 6305.63            | 8791.00            | 0.579                          | 4240.23            | 2454.87            |
| A_68_P23403484 | chr4:149329133-149329178                          | NM_029035:-40      | Spsb1      | PROMOTER               | 0.656                                                        | 2.259                          | 1446.81            | 3267.93            | 1.482                          | 1119.36            | 1658.90            |
| A_68_P28615786 | chr12:88729140-88729184                           | NM_011479:18       | Sptlc2     | INSIDE                 | 0.375                                                        | 17.400                         | 774.55             | 13476.88           | 6.526                          | 757.97             | 4946.72            |
| A_68_P28615783 | chr12:88728757-88728801                           | NM_011479:402      | Sptlc2     | INSIDE                 | 0.406                                                        | 4.967                          | 1158.90            | 5755.72            | 2.017                          | 1017.67            | 2052.99            |
| A_68_P28615267 | chr12:88640639-88640683                           | NM_011479:88520    | Sptlc2     | DOWNSTREAM             | 0.605                                                        | 4.716                          | 699.39             | 3298.52            | 2.855                          | 682.87             | 1949.59            |
| A_68_P28615271 | chr12:88641179-88641223                           | NM_011479:87980    | Sptlc2     | DOWNSTREAM             | 0.664                                                        | 0.168                          | 3968.25            | 665.40             | 0.111                          | 2707.98            | 301.72             |
| A_68_P25102503 | chr7:54263926-54263970                            | NM_175318:-164     | Spty2d1    | PROMOTER               | 0.404                                                        | 0.342                          | 2201.62            | 753.89             | 0.138                          | 1781.20            | 246.15             |
| A_68_P25102500 | chr7:54263669-54263713                            | NM_175318:94       | Spty2d1    | INSIDE                 | 0.454                                                        | 6.467                          | 3039.27            | 19656.11           | 2.938                          | 2376.88            | 6982.53            |
| A_68_P21587981 | chr2:122591010-122591054                          | NM_001162503:-62   | Sqrdl      | PROMOTER               | 0.252                                                        | 30.517                         | 2179.99            | 66525.79           | 7.693                          | 2040.56            | 15698.75           |
| A_68_P21587980 | chr2:122590894-122590938                          | NM_001162503:-178  | Sqrdl      | PROMOTER               | 0.471                                                        | 0.235                          | 2211.21            | 520.59             | 0.111                          | 1558.62            | 172.66             |
| A_68_P27787321 | chr11:50023806-50023850                           | NM_011018:464      | Sqstm1     | INSIDE                 | 0.627                                                        | 6.929                          | 5593.53            | 38759.49           | 4.343                          | 4686.81            | 20353.84           |
| A_68_P31625185 | chr18:36829798-36829843                           | NM_001164406:145   | Sra1       | INSIDE                 | 0.417                                                        | 0.428                          | 1743.38            | 746.09             | 0.179                          | 1217.44            | 217.43             |
| A_68_P21777116 | chr2:157282885-157282929                          | NM_001025395:32878 | Src        | INSIDE                 | 0.649                                                        | 3.222                          | 1800.13            | 5800.61            | 2.092                          | 1413.63            | 2957.28            |
| A_68_P28051255 | chr11:97407967-97408011                           | NM_018873:28452    | Srcin1     | INSIDE                 | 0.317                                                        | 8.625                          | 1287.69            | 11106.43           | 2.735                          | 1015.31            | 2776.77            |
| A_68_P28051298 | chr11:97413135-97413179                           | NM_018873:23284    | Srcin1     | INSIDE                 | 0.482                                                        | 4.338                          | 1189.66            | 5160.49            | 2.093                          | 980.54             | 2052.00            |
| A_68_P28051188 | chr11:97398038-97398082                           | NM_018873:38380    | Srcin1     | INSIDE                 | 0.504                                                        | 4.913                          | 1153.69            | 5668.10            | 2.478                          | 943.27             | 2337.66            |
| A_68_P28051170 | chr11:97396005-97396049                           | NM_018873:40414    | Srcin1     | INSIDE                 | 0.549                                                        | 4.521                          | 1309.04            | 5918.14            | 2.482                          | 1111.12            | 2758.33            |
| A_68_P24118744 | chr5:136438405-136438449                          | NM_001160366:11920 | Srerb4d    | INSIDE                 | 0.296                                                        | 0.215                          | 3782.94            | 813.03             | 0.064                          | 2700.39            | 171.50             |

| ProbeName      | Target position of probe on CpG island microarray | TargetID           | GeneSymbol | CpG island Description | Ratio of relative methylation (TiO <sub>2</sub> -NP/Vehicle) | Sham group                     |                    |                    | TiO <sub>2</sub> -H group      |                    |                    |
|----------------|---------------------------------------------------|--------------------|------------|------------------------|--------------------------------------------------------------|--------------------------------|--------------------|--------------------|--------------------------------|--------------------|--------------------|
|                |                                                   |                    |            |                        |                                                              | Relative methylation (Cy5/Cy3) | Cy3 signal (Input) | Cy5 signal (MeDIP) | Relative methylation (Cy5/Cy3) | Cy3 signal (Input) | Cy5 signal (MeDIP) |
| A_68_P24118747 | chr5:136438697-136438741                          | NM_001160366:11628 | Srerb4d    | INSIDE                 | 0.476                                                        | 7.883                          | 1549.56            | 12215.52           | 3.753                          | 1231.39            | 4621.59            |
| A_68_P24118745 | chr5:136438525-136438569                          | NM_001160366:11800 | Srerb4d    | INSIDE                 | 0.423                                                        | 0.731                          | 4377.74            | 3200.32            | 0.309                          | 3132.85            | 969.07             |
| A_68_P29116722 | chr13:69750305-69750349                           | NM_175283:15       | Srd5a1     | INSIDE                 | 0.481                                                        | 3.428                          | 1868.32            | 6404.75            | 1.65                           | 1356.24            | 2238.09            |
| A_68_P31349753 | chr17:74397223-74397267                           | NM_053188:12       | Srd5a2     | INSIDE                 | 0.291                                                        | 6.484                          | 3013.79            | 19540.63           | 1.89                           | 2485.46            | 4697.10            |
| A_68_P23814358 | chr5:76569347-76569391                            | NM_020611:71       | Srd5a3     | INSIDE                 | 0.342                                                        | 7.018                          | 1335.00            | 9369.30            | 2.404                          | 1129.73            | 2715.53            |
| A_68_P27841686 | chr11:60033953-60033997                           | NM_011480:132      | Srebf1     | INSIDE                 | 0.552                                                        | 0.264                          | 1741.07            | 460.04             | 0.146                          | 1188.00            | 173.23             |
| A_68_P27841610 | chr11:60023907-60023951                           | NM_011480:10178    | Srebf1     | INSIDE                 | 0.612                                                        | 0.728                          | 2074.77            | 1510.39            | 0.445                          | 1696.82            | 755.50             |
| A_68_P27841688 | chr11:60034191-60034235                           | NM_011480:-106     | Srebf1     | PROMOTER               | 0.606                                                        | 2.765                          | 1403.36            | 3880.53            | 1.676                          | 1102.97            | 1848.15            |
| A_68_P30381701 | chr15:81977690-81977734                           | NM_033218:14       | Srebf2     | INSIDE                 | 0.371                                                        | 6.379                          | 8215.56            | 52408.15           | 2.369                          | 6171.03            | 14618.79           |
| A_68_P30381702 | chr15:81977800-81977844                           | NM_033218:124      | Srebf2     | INSIDE                 | 0.574                                                        | 0.458                          | 1364.87            | 625.72             | 0.263                          | 1024.85            | 269.87             |
| A_68_P30381703 | chr15:81977883-81977927                           | NM_033218:206      | Srebf2     | INSIDE                 | 0.583                                                        | 0.216                          | 7521.51            | 1625.00            | 0.126                          | 5172.89            | 651.05             |
| A_68_P29286848 | chr13:104564132-104564176                         | NM_172592:-9492    | Srek1      | PROMOTER               | 0.405                                                        | 0.472                          | 2136.96            | 1008.92            | 0.191                          | 1802.32            | 345.01             |
| A_68_P29292645 | chr13:105607251-105607295                         | NM_026075:-46      | Srek1ip1   | DIVERGENT_PROMOTER     | 0.64                                                         | 0.386                          | 1304.00            | 503.88             | 0.247                          | 1120.17            | 277.20             |
| A_68_P31207575 | chr17:46691962-46692006                           | NM_020493:1127     | Srf        | INSIDE                 | 0.385                                                        | 0.268                          | 8520.05            | 2279.70            | 0.103                          | 5509.04            | 568.20             |
| A_68_P31207578 | chr17:46692314-46692358                           | NM_020493:775      | Srf        | INSIDE                 | 0.434                                                        | 0.355                          | 1581.74            | 560.85             | 0.154                          | 1126.85            | 173.48             |
| A_68_P31207574 | chr17:46691890-46691934                           | NM_020493:1199     | Srf        | INSIDE                 | 0.586                                                        | 0.555                          | 4633.97            | 2571.44            | 0.325                          | 3359.52            | 1092.89            |
| A_68_P31207579 | chr17:46692454-46692498                           | NM_020493:635      | Srf        | INSIDE                 | 0.594                                                        | 4.499                          | 2250.07            | 10123.89           | 2.671                          | 1949.78            | 5207.91            |
| A_68_P31207577 | chr17:46692178-46692222                           | NM_020493:911      | Srf        | INSIDE                 | 0.593                                                        | 0.733                          | 4237.18            | 3105.48            | 0.435                          | 3055.51            | 1329.00            |
| A_68_P31707756 | chr18:52625256-52625301                           | NM_026040:-68      | Srfbp1     | PROMOTER               | 0.418                                                        | 0.634                          | 748.62             | 474.97             | 0.265                          | 669.37             | 177.64             |
| A_68_P24755319 | chr6:112677559-112677603                          | NM_080448:219680   | Srgap3     | INSIDE                 | 0.355                                                        | 2.003                          | 3894.57            | 7802.11            | 0.711                          | 2713.45            | 1929.44            |
| A_68_P31612299 | chr18:34490607-34490651                           | NM_025527:-170     | Srp19      | PROMOTER               | 0.384                                                        | 6.366                          | 1794.84            | 11425.33           | 2.448                          | 1422.63            | 3482.01            |
| A_68_P31612301 | chr18:34490799-34490843                           | NM_025527:22       | Srp19      | INSIDE                 | 0.569                                                        | 3.093                          | 1264.91            | 3912.00            | 1.758                          | 984.56             | 1731.08            |
| A_68_P28450919 | chr12:56331687-56331731                           | NM_001100110:244   | Srp54c     | INSIDE                 | 0.431                                                        | 0.494                          | 1129.23            | 557.63             | 0.213                          | 853.72             | 181.71             |
| A_68_P28158413 | chr11:116135476-116135520                         | NM_146032:33       | Srp68      | INSIDE                 | 0.296                                                        | 0.444                          | 7277.56            | 3229.84            | 0.131                          | 4487.06            | 589.75             |
| A_68_P23819150 | chr5:77403737-77403781                            | NM_025691:33       | Srp72      | INSIDE                 | 0.598                                                        | 9.753                          | 3631.82            | 35420.19           | 5.835                          | 2981.44            | 17398.05           |
| A_68_P20885446 | chr1:184055324-184055368                          | NM_012058:479      | Srp9       | INSIDE                 | 0.495                                                        | 0.183                          | 2689.96            | 493.40             | 0.091                          | 2007.08            | 182.07             |
| A_68_P20885441 | chr1:184054789-184054833                          | NM_012058:-57      | Srp9       | PROMOTER               | 0.345                                                        | 5.066                          | 1395.93            | 7071.10            | 1.749                          | 1364.20            | 2386.36            |
| A_68_P27923259 | chr11:74739230-74739274                           | NM_001163311:48    | Srr        | INSIDE                 | 0.565                                                        | 0.379                          | 1387.74            | 525.97             | 0.214                          | 964.63             | 206.54             |
| A_68_P27923257 | chr11:74738967-74739011                           | NM_001163311:312   | Srr        | INSIDE                 | 0.245                                                        | 1.637                          | 706.67             | 1156.85            | 0.402                          | 693.66             | 278.66             |
| A_68_P23991577 | chr5:112772027-112772071                          | NM_027323:12       | Srrd       | INSIDE                 | 0.356                                                        | 9.834                          | 15906.55           | 156425.20          | 3.499                          | 13275.67           | 46454.18           |
| A_68_P23328080 | chr4:134908744-134908788                          | NM_001130477:363   | Srrm1      | INSIDE                 | 0.298                                                        | 6.905                          | 1479.01            | 10212.29           | 2.056                          | 1416.95            | 2913.82            |
| A_68_P31093720 | chr17:23940883-23940927                           | NM_175229:751      | Srrm2      | INSIDE                 | 0.277                                                        | 10.108                         | 1958.51            | 19795.94           | 2.804                          | 1623.79            | 4553.91            |
| A_68_P23330841 | chr4:135411994-135412038                          | NM_001080387:10    | Srsf10     | INSIDE                 | 0.369                                                        | 0.261                          | 2410.39            | 629.17             | 0.096                          | 1808.11            | 174.16             |
| A_68_P22683257 | chr3:157694741-157694785                          | NM_001093753:-44   | Srsf11     | PROMOTER               | 0.425                                                        | 0.311                          | 2276.09            | 708.64             | 0.132                          | 1835.40            | 242.58             |
| A_68_P22825734 | chr4:33296280-33296324                            | NM_177774:337      | Srsf12     | INSIDE                 | 0.243                                                        | 10.272                         | 1327.10            | 13631.74           | 2.501                          | 1158.65            | 2897.71            |
| A_68_P22825735 | chr4:33296468-33296513                            | NM_177774:525      | Srsf12     | INSIDE                 | 0.39                                                         | 0.424                          | 3081.14            | 1306.95            | 0.165                          | 2467.00            | 407.73             |
| A_68_P22825736 | chr4:33296596-33296640                            | NM_177774:653      | Srsf12     | INSIDE                 | 0.405                                                        | 5.363                          | 5715.09            | 30649.37           | 2.169                          | 4247.43            | 9214.69            |
| A_68_P28161643 | chr11:116713965-116714009                         | NM_011358:422      | Srsf2      | INSIDE                 | 0.571                                                        | 4.954                          | 653.05             | 3235.36            | 2.827                          | 587.39             | 1660.35            |
| A_68_P28161641 | chr11:116713805-116713849                         | NM_011358:582      | Srsf2      | INSIDE                 | 0.139                                                        | 12.148                         | 1791.94            | 21767.64           | 1.69                           | 1609.92            | 2720.95            |
| A_68_P28161647 | chr11:116714367-116714411                         | NM_011358:20       | Srsf2      | INSIDE                 | 0.379                                                        | 1.815                          | 3435.71            | 6236.16            | 0.688                          | 2475.39            | 1703.22            |
| A_68_P23308817 | chr4:131429521-131429565                          | NM_020587:-11      | Srsf4      | PROMOTER               | 0.448                                                        | 7.422                          | 682.52             | 5065.55            | 3.323                          | 611.89             | 2033.13            |
| A_68_P23308822 | chr4:131430090-131430134                          | NM_020587:559      | Srsf4      | INSIDE                 | 0.466                                                        | 0.389                          | 1501.90            | 584.45             | 0.181                          | 1123.42            | 203.62             |
| A_68_P23308821 | chr4:131429974-131430018                          | NM_020587:443      | Srsf4      | INSIDE                 | 0.589                                                        | 2.694                          | 1073.69            | 2891.99            | 1.586                          | 1010.39            | 1602.42            |
| A_68_P28578485 | chr12:82046655-82046699                           | NM_001079694:186   | Srsf5      | INSIDE                 | 0.55                                                         | 0.284                          | 2669.10            | 759.28             | 0.156                          | 2118.75            | 331.45             |
| A_68_P28578486 | chr12:82046738-82046782                           | NM_001079694:270   | Srsf5      | INSIDE                 | 0.114                                                        | 0.697                          | 4739.14            | 3303.91            | 0.079                          | 3149.86            | 249.86             |
| A_68_P24009031 | chr5:115777029-115777073                          | NM_025573:-135     | Srsf9      | PROMOTER               | 0.489                                                        | 6.783                          | 2016.18            | 13676.53           | 3.315                          | 1821.64            | 6038.89            |

| ProbeName      | Target position of probe on CpG island microarray | TargetID          | GeneSymbol | CpG island Description | Ratio of relative methylation (TiO <sub>2</sub> -NP/Vehicle) | Sham group                     |                    |                    | TiO <sub>2</sub> -H group      |                    |                    |
|----------------|---------------------------------------------------|-------------------|------------|------------------------|--------------------------------------------------------------|--------------------------------|--------------------|--------------------|--------------------------------|--------------------|--------------------|
|                |                                                   |                   |            |                        |                                                              | Relative methylation (Cy5/Cy3) | Cy3 signal (Input) | Cy5 signal (MeDIP) | Relative methylation (Cy5/Cy3) | Cy3 signal (Input) | Cy5 signal (MeDIP) |
| A_68_P21747681 | chr2:151931454-151931498                          | NM_029688:11      | Srxn1      | INSIDE                 | 0.496                                                        | 0.440                          | 2389.36            | 1052.18            | 0.218                          | 1890.55            | 412.54             |
| A_68_P21747680 | chr2:151931345-151931389                          | NM_029688:-99     | Srxn1      | PROMOTER               | 0.658                                                        | 0.402                          | 3257.66            | 1309.65            | 0.265                          | 2470.05            | 653.77             |
| A_68_P31513737 | chr18:14841164-14841208                           | NM_001161369:237  | Ss18       | INSIDE                 | 0.573                                                        | 10.602                         | 1362.45            | 14444.14           | 6.08                           | 1228.99            | 7472.10            |
| A_68_P24389050 | chr6:40421239-40421283                            | NM_028358:-153    | Ssbp1      | PROMOTER               | 0.539                                                        | 0.582                          | 1868.79            | 1086.97            | 0.314                          | 1644.64            | 516.06             |
| A_68_P24389053 | chr6:40421556-40421600                            | NM_028358:165     | Ssbp1      | INSIDE                 | 0.494                                                        | 3.584                          | 896.15             | 3212.16            | 1.772                          | 740.07             | 1311.17            |
| A_68_P29218716 | chr13:91599885-91599929                           | NM_024186:-795    | Ssbp2      | PROMOTER               | 0.102                                                        | 174.625                        | 672.69             | 117469.20          | 17.854                         | 442.39             | 7898.70            |
| A_68_P29218720 | chr13:91600319-91600363                           | NM_024186:-361    | Ssbp2      | PROMOTER               | 0.191                                                        | 18.334                         | 2704.99            | 49594.22           | 3.511                          | 2556.31            | 8974.46            |
| A_68_P29218721 | chr13:91600629-91600673                           | NM_024186:-51     | Ssbp2      | PROMOTER               | 0.284                                                        | 7.627                          | 1494.61            | 11399.36           | 2.167                          | 1221.49            | 2646.45            |
| A_68_P29218725 | chr13:91601454-91601498                           | NM_024186:775     | Ssbp2      | INSIDE                 | 0.56                                                         | 0.731                          | 3313.02            | 2422.51            | 0.409                          | 2465.42            | 1009.39            |
| A_68_P23187158 | chr4:106584284-106584328                          | NM_023672:232     | Ssbp3      | INSIDE                 | 0.348                                                        | 1.573                          | 1848.55            | 2907.47            | 0.547                          | 1467.94            | 802.48             |
| A_68_P25952971 | chr8:73131884-73131928                            | NM_133772:307     | Ssbp4      | INSIDE                 | 0.612                                                        | 0.537                          | 2730.85            | 1465.88            | 0.328                          | 1965.90            | 645.76             |
| A_68_P24001336 | chr5:114443642-114443686                          | NM_198109:102     | Ssh1       | INSIDE                 | 0.09                                                         | 33.204                         | 956.51             | 31759.58           | 2.987                          | 895.25             | 2674.46            |
| A_68_P27937051 | chr11:77161599-77161643                           | NM_177710:131694  | Ssh2       | INSIDE                 | 0.183                                                        | 17.644                         | 1507.63            | 26600.26           | 3.226                          | 1329.41            | 4288.45            |
| A_68_P27936388 | chr11:77029801-77029845                           | NM_177710:-104    | Ssh2       | PROMOTER               | 0.559                                                        | 0.649                          | 4703.86            | 3050.84            | 0.362                          | 3184.38            | 1154.16            |
| A_68_P31922172 | chr19:4269137-4269181                             | NM_198113:14      | Ssh3       | INSIDE                 | 0.5                                                          | 0.490                          | 1022.56            | 501.35             | 0.245                          | 697.88             | 171.17             |
| A_68_P21071033 | chr2:25127873-25127917                            | NM_023464:44      | Ssna1      | INSIDE                 | 0.436                                                        | 5.907                          | 2569.10            | 15176.02           | 2.573                          | 2065.33            | 5314.07            |
| A_68_P28957970 | chr13:38085587-38085631                           | NM_025965:451     | Ssr1       | INSIDE                 | 0.445                                                        | 0.239                          | 4223.06            | 1009.36            | 0.106                          | 3072.11            | 326.86             |
| A_68_P28957974 | chr13:38085985-38086029                           | NM_025965:53      | Ssr1       | INSIDE                 | 0.536                                                        | 0.315                          | 1627.74            | 512.03             | 0.169                          | 1324.03            | 223.20             |
| A_68_P32464770 | chrX:71032514-71032558                            | NM_009279:55      | Ssr4       | INSIDE                 | 0.628                                                        | 0.601                          | 775.11             | 465.90             | 0.378                          | 1005.70            | 379.91             |
| A_68_P21395954 | chr2:84877657-84877701                            | NM_001136081:71   | Ssrp1      | INSIDE                 | 0.455                                                        | 0.426                          | 1121.19            | 477.29             | 0.194                          | 860.96             | 166.70             |
| A_68_P21395950 | chr2:84877269-84877313                            | NM_182990:-67     | Ssrp1      | DIVERGENT_PROMOTER     | 0.642                                                        | 0.127                          | 4495.70            | 571.40             | 0.082                          | 2994.17            | 244.23             |
| A_68_P28466190 | chr12:59313609-59313653                           | NM_009216:840     | Sstr1      | INSIDE                 | 0.508                                                        | 6.620                          | 1165.22            | 7713.75            | 3.36                           | 1156.44            | 3886.09            |
| A_68_P30360706 | chr15:78370035-78370079                           | NM_009218:4719    | Sstr3      | INSIDE                 | 0.286                                                        | 9.952                          | 1579.74            | 15721.33           | 2.845                          | 1304.84            | 3712.66            |
| A_68_P23440100 | chr4:155079091-155079135                          | NM_026899:189     | Ssu72      | INSIDE                 | 0.154                                                        | 21.946                         | 7516.46            | 164959.10          | 3.381                          | 6348.83            | 21462.90           |
| A_68_P22614372 | chr3:146067861-146067905                          | NM_138744:232     | Ssx2ip     | INSIDE                 | 0.592                                                        | 8.704                          | 926.58             | 8064.60            | 5.153                          | 788.61             | 4063.97            |
| A_68_P22614368 | chr3:146067514-146067558                          | NM_138744:-114    | Ssx2ip     | PROMOTER               | 0.596                                                        | 0.485                          | 1134.89            | 550.24             | 0.289                          | 983.15             | 284.10             |
| A_68_P26398844 | chr9:30939486-30939530                            | NM_011176:-124    | St14       | PROMOTER               | 0.216                                                        | 14.902                         | 5684.63            | 84710.67           | 3.219                          | 4778.31            | 15380.51           |
| A_68_P30296517 | chr15:67008766-67008810                           | NM_009177:-344    | St3gal1    | PROMOTER               | 0.521                                                        | 0.625                          | 3318.88            | 2075.33            | 0.326                          | 2483.44            | 808.67             |
| A_68_P30296514 | chr15:67008443-67008487                           | NM_009177:-20     | St3gal1    | PROMOTER               | 0.61                                                         | 2.819                          | 1097.04            | 3092.86            | 1.72                           | 924.90             | 1591.29            |
| A_68_P26165552 | chr8:113443992-113444036                          | NM_009179:250     | St3gal2    | INSIDE                 | 0.228                                                        | 15.119                         | 2206.22            | 33355.75           | 3.455                          | 2054.16            | 7096.33            |
| A_68_P26165834 | chr8:113494088-113494132                          | NM_009179:50346   | St3gal2    | INSIDE                 | 0.662                                                        | 0.395                          | 1300.08            | 514.05             | 0.262                          | 1034.52            | 270.70             |
| A_68_P23238480 | chr4:117807649-117807693                          | NM_001161774:-151 | St3gal3    | PROMOTER               | 0.577                                                        | 3.996                          | 2930.07            | 11707.11           | 2.304                          | 2454.68            | 5655.30            |
| A_68_P24539865 | chr6:72047349-72047393                            | NM_001035228:-236 | St3gal5    | PROMOTER               | 0.521                                                        | 0.422                          | 1304.79            | 550.03             | 0.219                          | 1068.88            | 234.61             |
| A_68_P24539866 | chr6:72047427-72047471                            | NM_001035228:-158 | St3gal5    | PROMOTER               | 0.629                                                        | 2.538                          | 1532.42            | 3889.86            | 1.597                          | 1295.00            | 2068.25            |
| A_68_P30792109 | chr16:58523405-58523449                           | NM_018784:-1      | St3gal6    | PROMOTER               | 0.511                                                        | 0.725                          | 2050.70            | 1487.64            | 0.37                           | 1644.36            | 609.20             |
| A_68_P30601918 | chr16:23225193-23225237                           | NM_145933:380     | St6gal1    | INSIDE                 | 0.415                                                        | 5.971                          | 2056.46            | 12280.02           | 2.481                          | 1713.72            | 4250.91            |
| A_68_P30601919 | chr16:23225265-23225309                           | NM_145933:452     | St6gal1    | INSIDE                 | 0.202                                                        | 8.080                          | 1586.76            | 12821.04           | 1.635                          | 1403.68            | 2294.32            |
| A_68_P22658557 | chr3:153388050-153388094                          | NM_011372:25      | St6galnac3 | INSIDE                 | 0.386                                                        | 6.342                          | 3858.07            | 24468.67           | 2.448                          | 3094.73            | 7574.95            |
| A_68_P21116241 | chr2:32442826-32442870                            | NM_011373:-161    | St6galnac4 | PROMOTER               | 0.593                                                        | 0.280                          | 3698.80            | 1036.90            | 0.166                          | 2304.16            | 383.17             |
| A_68_P21116407 | chr2:32470667-32470711                            | NM_001025310:8208 | St6galnac6 | INSIDE                 | 0.471                                                        | 5.167                          | 1411.27            | 7291.65            | 2.435                          | 984.56             | 2397.46            |
| A_68_P21116392 | chr2:32467870-32467914                            | NM_001025310:5412 | St6galnac6 | INSIDE                 | 0.523                                                        | 3.246                          | 955.30             | 3101.19            | 1.696                          | 755.54             | 1281.66            |
| A_68_P24907676 | chr6:142912659-142912703                          | NM_011374:292     | St8sia1    | INSIDE                 | 0.365                                                        | 0.252                          | 4450.76            | 1119.46            | 0.092                          | 2824.49            | 259.56             |
| A_68_P24907678 | chr6:142912941-142912985                          | NM_011374:10      | St8sia1    | INSIDE                 | 0.045                                                        | 35.016                         | 2360.18            | 82645.11           | 1.575                          | 1877.24            | 2957.50            |
| A_68_P31774240 | chr18:64425610-64425654                           | NM_009182:11620   | St8sia3    | INSIDE                 | 0.58                                                         | 0.255                          | 2977.95            | 760.20             | 0.148                          | 2477.38            | 367.06             |
| A_68_P31846334 | chr18:77424014-77424058                           | NM_013666:-549    | St8sia5    | PROMOTER               | 0.482                                                        | 0.289                          | 1625.22            | 469.07             | 0.139                          | 1237.29            | 171.98             |
| A_68_P31846729 | chr18:77493099-77493143                           | NM_013666:68535   | St8sia5    | INSIDE                 | 0.555                                                        | 4.099                          | 1499.76            | 6148.10            | 2.274                          | 1143.08            | 2599.72            |

| ProbeName      | Target position of probe on CpG island microarray | TargetID          | GeneSymbol | CpG island Description | Ratio of relative methylation (TiO <sub>2</sub> -NP/Vehicle) | Sham group                     |                    |                    | TiO <sub>2</sub> -H group      |                    |                    |
|----------------|---------------------------------------------------|-------------------|------------|------------------------|--------------------------------------------------------------|--------------------------------|--------------------|--------------------|--------------------------------|--------------------|--------------------|
|                |                                                   |                   |            |                        |                                                              | Relative methylation (Cy5/Cy3) | Cy3 signal (Input) | Cy5 signal (MeDIP) | Relative methylation (Cy5/Cy3) | Cy3 signal (Input) | Cy5 signal (MeDIP) |
| A_68_P31846338 | chr18:77424406-77424450                           | NM_013666:-157    | St8sia5    | PROMOTER               | 0.606                                                        | 3.004                          | 970.36             | 2915.18            | 1.821                          | 1005.23            | 1830.79            |
| A_68_P28054168 | chr11:97913868-97913912                           | NM_146028:886     | Stac2      | INSIDE                 | 0.568                                                        | 4.071                          | 9519.30            | 38748.93           | 2.311                          | 6996.43            | 16167.87           |
| A_68_P28054165 | chr11:97913498-97913542                           | NM_146028:1256    | Stac2      | INSIDE                 | 0.489                                                        | 3.530                          | 1343.95            | 4743.72            | 1.727                          | 1157.77            | 1999.16            |
| A_68_P26770654 | chr9:100544043-100544087                          | NM_009282:23      | Stag1      | INSIDE                 | 0.281                                                        | 0.634                          | 1164.96            | 738.69             | 0.178                          | 975.90             | 173.81             |
| A_68_P32341125 | chrX:39502207-39502251                            | NM_001077712:-360 | Stag2      | PROMOTER               | 0.113                                                        | 23.329                         | 573.78             | 13385.56           | 2.638                          | 782.73             | 2065.03            |
| A_68_P21221436 | chr2:52601404-52601448                            | NM_019667:-243    | Stam2      | PROMOTER               | 0.436                                                        | 4.089                          | 1929.37            | 7888.42            | 1.783                          | 1685.76            | 3005.35            |
| A_68_P25372610 | chr7:108469852-108469896                          | NM_019990:42      | Stard10    | INSIDE                 | 0.23                                                         | 24.513                         | 14694.86           | 360212.20          | 5.633                          | 12104.94           | 68183.90           |
| A_68_P25372613 | chr7:108470115-108470159                          | NM_019990:304     | Stard10    | INSIDE                 | 0.522                                                        | 0.425                          | 2143.49            | 911.03             | 0.222                          | 1609.67            | 357.39             |
| A_68_P28055912 | chr11:98219735-98219779                           | NM_021547:59      | Stard3     | INSIDE                 | 0.56                                                         | 0.482                          | 2503.02            | 1206.41            | 0.27                           | 2025.66            | 546.42             |
| A_68_P28055911 | chr11:98219606-98219650                           | NM_021547:-69     | Stard3     | PROMOTER               | 0.644                                                        | 0.419                          | 2385.51            | 998.46             | 0.27                           | 1924.84            | 518.80             |
| A_68_P28055914 | chr11:98219976-98220020                           | NM_021547:301     | Stard3     | INSIDE                 | 0.387                                                        | 5.054                          | 909.09             | 4594.51            | 1.955                          | 829.48             | 1621.67            |
| A_68_P28862223 | chr13:19487305-19487349                           | NM_024270:295     | Stard3nl   | INSIDE                 | 0.597                                                        | 3.841                          | 1162.52            | 4465.63            | 2.295                          | 997.80             | 2290.03            |
| A_68_P21612440 | chr2:127096105-127096149                          | NM_139308:162     | Stard7     | INSIDE                 | 0.582                                                        | 5.553                          | 978.66             | 5434.17            | 3.229                          | 935.23             | 3020.10            |
| A_68_P32553141 | chrX:96238064-96238108                            | NM_199018:167     | Stard8     | INSIDE                 | 0.303                                                        | 11.547                         | 2154.10            | 24873.26           | 3.498                          | 2286.14            | 7998.04            |
| A_68_P32553143 | chrX:96238297-96238345                            | NM_199018:401     | Stard8     | INSIDE                 | 0.576                                                        | 16.383                         | 181.69             | 2976.60            | 9.44                           | 259.72             | 2451.64            |
| A_68_P23457345 | chr5:5749151-5749195                              | NM_027399:145     | Steap1     | INSIDE                 | 0.182                                                        | 23.290                         | 5675.45            | 132181.20          | 4.247                          | 4774.64            | 20277.72           |
| A_68_P23457021 | chr5:5694320-5694364                              | NM_001103156:-265 | Steap2     | PROMOTER               | 0.487                                                        | 6.675                          | 2220.02            | 14817.92           | 3.247                          | 1899.53            | 6168.35            |
| A_68_P23457020 | chr5:5694251-5694295                              | NM_001103156:-195 | Steap2     | PROMOTER               | 0.616                                                        | 0.747                          | 3671.27            | 2741.46            | 0.46                           | 2980.38            | 1371.39            |
| A_68_P23222803 | chr4:114672646-114672690                          | NM_009185:-54     | Stil       | PROMOTER               | 0.413                                                        | 5.635                          | 514.54             | 2899.54            | 2.328                          | 514.38             | 1197.62            |
| A_68_P23222804 | chr4:114672804-114672848                          | NM_009185:104     | Stil       | INSIDE                 | 0.553                                                        | 0.555                          | 944.55             | 524.32             | 0.307                          | 706.34             | 216.97             |
| A_68_P25377989 | chr7:109416038-109416082                          | NM_009287:-277    | Stim1      | PROMOTER               | 0.389                                                        | 11.561                         | 1217.60            | 14076.90           | 4.497                          | 1245.84            | 5602.65            |
| A_68_P25377988 | chr7:109415960-109416004                          | NM_009287:-355    | Stim1      | PROMOTER               | 0.486                                                        | 7.247                          | 1613.31            | 11692.16           | 3.52                           | 1412.95            | 4973.92            |
| A_68_P25377993 | chr7:109416492-109416536                          | NM_009287:177     | Stim1      | INSIDE                 | 0.378                                                        | 0.627                          | 841.39             | 527.61             | 0.237                          | 720.94             | 171.11             |
| A_68_P23703749 | chr5:54390129-54390173                            | NM_001081103:389  | Stim2      | INSIDE                 | 0.611                                                        | 7.994                          | 1441.68            | 11524.60           | 4.881                          | 1177.34            | 5746.12            |
| A_68_P31937446 | chr19:7114469-7114513                             | NM_016737:26      | Stip1      | INSIDE                 | 0.389                                                        | 1.728                          | 3196.57            | 5523.47            | 0.671                          | 2545.37            | 1708.99            |
| A_68_P27689365 | chr11:32432848-32432892                           | NM_009288:-395    | Stk10      | DIVERGENT_PROMOTER     | 0.462                                                        | 0.562                          | 1029.60            | 578.75             | 0.26                           | 828.76             | 215.10             |
| A_68_P27281038 | chr10:79578186-79578230                           | NM_011492:-1072   | Stk11      | PROMOTER               | 0.199                                                        | 1.775                          | 953.82             | 1693.02            | 0.353                          | 753.36             | 266.15             |
| A_68_P27281041 | chr10:79578414-79578458                           | NM_011492:-844    | Stk11      | PROMOTER               | 0.553                                                        | 0.621                          | 756.13             | 469.28             | 0.343                          | 648.76             | 222.49             |
| A_68_P20352666 | chr1:75207636-75207680                            | NM_011494:255     | Stk16      | INSIDE                 | 0.613                                                        | 0.395                          | 1563.73            | 618.28             | 0.242                          | 1227.98            | 297.45             |
| A_68_P31156004 | chr17:34973557-34973601                           | NM_019442:270     | Stk19      | INSIDE                 | 0.552                                                        | 3.869                          | 3317.82            | 12836.81           | 2.137                          | 2714.35            | 5799.51            |
| A_68_P29955473 | chr14:121778112-121778156                         | NM_145465:318     | Stk24      | INSIDE                 | 0.497                                                        | 3.836                          | 1232.28            | 4727.12            | 1.908                          | 1138.38            | 2171.56            |
| A_68_P29955475 | chr14:121778359-121778403                         | NM_145465:72      | Stk24      | INSIDE                 | 0.544                                                        | 0.606                          | 882.88             | 534.91             | 0.33                           | 825.12             | 272.11             |
| A_68_P20456742 | chr1:95532281-95532325                            | NM_021537:2       | Stk25      | INSIDE                 | 0.151                                                        | 31.244                         | 4798.25            | 149918.80          | 4.706                          | 4280.30            | 20141.23           |
| A_68_P20456741 | chr1:95532187-95532231                            | NM_021537:96      | Stk25      | INSIDE                 | 0.318                                                        | 7.816                          | 1565.60            | 12237.24           | 2.489                          | 1386.94            | 3452.66            |
| A_68_P20456738 | chr1:95531890-95531934                            | NM_021537:392     | Stk25      | INSIDE                 | 0.523                                                        | 0.461                          | 2836.07            | 1307.03            | 0.241                          | 2385.55            | 574.90             |
| A_68_P24432387 | chr6:49345594-49345638                            | NM_029916:14      | Stk31      | INSIDE                 | 0.334                                                        | 15.659                         | 5686.33            | 89040.63           | 5.232                          | 6212.99            | 32506.31           |
| A_68_P24432388 | chr6:49345736-49345780                            | NM_029916:156     | Stk31      | INSIDE                 | 0.625                                                        | 2.312                          | 1667.02            | 3853.76            | 1.446                          | 1308.97            | 1892.68            |
| A_68_P31659996 | chr18:43367102-43367146                           | NM_178749:-226    | Stk32a     | PROMOTER               | 0.395                                                        | 14.983                         | 2828.40            | 42378.51           | 5.917                          | 2304.88            | 13637.45           |
| A_68_P25576307 | chr7:146374240-146374284                          | NM_021302:131     | Stk32c     | INSIDE                 | 0.269                                                        | 15.387                         | 1056.02            | 16249.25           | 4.144                          | 942.87             | 3907.07            |
| A_68_P25576402 | chr7:146399285-146399329                          | NM_001162540:-100 | Stk32c     | PROMOTER               | 0.488                                                        | 0.330                          | 2089.52            | 689.84             | 0.161                          | 1745.04            | 281.27             |
| A_68_P25408016 | chr7:116582357-116582401                          | NM_054103:189     | Stk33      | INSIDE                 | 0.33                                                         | 8.335                          | 1844.82            | 15376.30           | 2.753                          | 1624.21            | 4471.70            |
| A_68_P21303499 | chr2:68309684-68309728                            | NM_016866:332     | Stk39      | INSIDE                 | 0.37                                                         | 0.326                          | 1897.48            | 618.01             | 0.121                          | 1449.36            | 174.79             |
| A_68_P23322940 | chr4:134024241-134024287                          | NM_019641:30      | Stmn1      | INSIDE                 | 0.422                                                        | 0.432                          | 1153.28            | 498.12             | 0.182                          | 961.04             | 175.02             |
| A_68_P23322942 | chr4:134024472-134024516                          | NM_019641:260     | Stmn1      | INSIDE                 | 0.461                                                        | 0.226                          | 2522.41            | 570.75             | 0.104                          | 1664.75            | 173.52             |
| A_68_P23322941 | chr4:134024349-134024393                          | NM_019641:136     | Stmn1      | INSIDE                 | 0.493                                                        | 5.564                          | 2832.99            | 15763.14           | 2.741                          | 2197.19            | 6022.58            |
| A_68_P28635988 | chr12:92885896-92885940                           | NM_175367:138958  | Ston2      | INSIDE                 | 0.378                                                        | 4.627                          | 925.93             | 4284.14            | 1.75                           | 719.88             | 1259.90            |

| ProbeName      | Target position of probe on CpG island microarray | TargetID          | GeneSymbol | CpG island Description | Ratio of relative methylation (TiO <sub>2</sub> -NP/Vehicle) | Sham group                     |                    |                    | TiO <sub>2</sub> -H group      |                    |                    |
|----------------|---------------------------------------------------|-------------------|------------|------------------------|--------------------------------------------------------------|--------------------------------|--------------------|--------------------|--------------------------------|--------------------|--------------------|
|                |                                                   |                   |            |                        |                                                              | Relative methylation (Cy5/Cy3) | Cy3 signal (Input) | Cy5 signal (MeDIP) | Relative methylation (Cy5/Cy3) | Cy3 signal (Input) | Cy5 signal (MeDIP) |
| A_68_P27187531 | chr10:62188832-62188876                           | NM_001033260:-7   | Stox1      | PROMOTER               | 0.438                                                        | 6.096                          | 1939.86            | 11824.88           | 2.67                           | 1656.47            | 4421.98            |
| A_68_P27187528 | chr10:62188471-62188515                           | NM_001033260:355  | Stox1      | INSIDE                 | 0.51                                                         | 5.133                          | 1621.93            | 8325.76            | 2.619                          | 1641.72            | 4300.12            |
| A_68_P25840857 | chr8:48373280-48373324                            | NM_001114311:1454 | Stox2      | INSIDE                 | 0.645                                                        | 0.339                          | 1993.07            | 676.63             | 0.219                          | 1485.65            | 325.14             |
| A_68_P25840861 | chr8:48373757-48373801                            | NM_001114311:978  | Stox2      | INSIDE                 | 0.333                                                        | 0.622                          | 4454.41            | 2768.75            | 0.207                          | 3012.25            | 623.10             |
| A_68_P28100097 | chr11:106055038-106055082                         | NM_028126:-198    | Strada     | PROMOTER               | 0.343                                                        | 0.213                          | 3165.58            | 675.03             | 0.073                          | 2400.09            | 175.45             |
| A_68_P31373355 | chr17:79135650-79135694                           | NM_011500:228     | Strn       | INSIDE                 | 0.256                                                        | 0.500                          | 2372.08            | 1186.95            | 0.128                          | 1702.51            | 218.00             |
| A_68_P31373358 | chr17:79136029-79136073                           | NM_011500:-150    | Strn       | PROMOTER               | 0.425                                                        | 6.001                          | 1127.60            | 6766.50            | 2.548                          | 1071.44            | 2729.78            |
| A_68_P31373354 | chr17:79135563-79135607                           | NM_011500:316     | Strn       | INSIDE                 | 0.273                                                        | 1.330                          | 5810.44            | 7725.01            | 0.362                          | 4252.47            | 1541.50            |
| A_68_P31106582 | chr17:25969835-25969879                           | NM_019719:450     | Stub1      | INSIDE                 | 0.599                                                        | 3.208                          | 1371.43            | 4399.72            | 1.923                          | 1153.84            | 2218.49            |
| A_68_P31106584 | chr17:25970012-25970056                           | NM_019719:272     | Stub1      | INSIDE                 | 0.556                                                        | 0.608                          | 3984.84            | 2424.17            | 0.338                          | 2602.93            | 880.08             |
| A_68_P24114435 | chr5:135518130-135518174                          | NM_016801:18711   | Stx1a      | INSIDE                 | 0.132                                                        | 35.841                         | 8353.11            | 299381.30          | 4.728                          | 7492.82            | 35427.42           |
| A_68_P24114431 | chr5:135517742-135517786                          | NM_016801:18323   | Stx1a      | INSIDE                 | 0.362                                                        | 1.747                          | 2305.55            | 4027.04            | 0.633                          | 1669.20            | 1056.22            |
| A_68_P25507562 | chr7:134967999-134968043                          | NM_024414:25      | Stx1b      | INSIDE                 | 0.376                                                        | 5.694                          | 6040.06            | 34392.47           | 2.141                          | 5067.13            | 10848.90           |
| A_68_P25507560 | chr7:134967764-134967808                          | NM_024414:259     | Stx1b      | INSIDE                 | 0.381                                                        | 0.646                          | 8045.51            | 5198.03            | 0.246                          | 5440.19            | 1338.54            |
| A_68_P25507649 | chr7:134985559-134985603                          | NM_009294:259     | Stx4a      | INSIDE                 | 0.443                                                        | 0.304                          | 4126.89            | 1255.92            | 0.135                          | 2715.30            | 365.96             |
| A_68_P31943308 | chr19:8815842-8815886                             | NM_001167799:-49  | Stx5a      | PROMOTER               | 0.617                                                        | 0.322                          | 3042.10            | 980.33             | 0.199                          | 2102.17            | 417.85             |
| A_68_P20736177 | chr1:157006243-157006287                          | NM_021433:432     | Stx6       | INSIDE                 | 0.161                                                        | 1.491                          | 945.99             | 1410.78            | 0.24                           | 743.64             | 178.73             |
| A_68_P26932995 | chr10:9620910-9620954                             | NM_001081344:-94  | Stxbp5     | PROMOTER               | 0.456                                                        | 5.875                          | 697.93             | 4100.38            | 2.677                          | 668.92             | 1790.54            |
| A_68_P30680167 | chr16:37384851-37384895                           | NM_001114611:172  | Stxbp5l    | INSIDE                 | 0.429                                                        | 0.482                          | 2109.56            | 1016.26            | 0.207                          | 1613.95            | 333.70             |
| A_68_P28402112 | chr12:46175110-46175154                           | NM_144552:338     | Stxbp6     | INSIDE                 | 0.233                                                        | 6.723                          | 3350.74            | 22527.40           | 1.565                          | 2656.67            | 4157.77            |
| A_68_P28402111 | chr12:46175015-46175059                           | NM_144552:434     | Stxbp6     | INSIDE                 | 0.529                                                        | 2.763                          | 8643.98            | 23881.18           | 1.462                          | 6562.63            | 9591.75            |
| A_68_P29718152 | chr14:73952682-73952726                           | NM_011506:112     | Suca2      | INSIDE                 | 0.647                                                        | 9.240                          | 1843.41            | 17033.81           | 5.981                          | 1522.85            | 9108.78            |
| A_68_P29752204 | chr14:79987400-79987444                           | NM_026474:-75     | Sugt1      | PROMOTER               | 0.194                                                        | 21.182                         | 3054.32            | 64697.14           | 4.105                          | 2767.81            | 11362.74           |
| A_68_P24731710 | chr6:108090490-108090549                          | NM_145937:45058   | Sumf1      | INSIDE                 | 0.509                                                        | 13.474                         | 241.71             | 3256.82            | 6.857                          | 197.85             | 1356.71            |
| A_68_P28154074 | chr11:115397049-115397093                         | NM_133354:474     | Sumo2      | INSIDE                 | 0.259                                                        | 29.466                         | 10963.04           | 323041.50          | 7.622                          | 10328.40           | 78720.07           |
| A_68_P28154071 | chr11:115396739-115396783                         | NM_133354:784     | Sumo2      | INSIDE                 | 0.663                                                        | 0.454                          | 2167.75            | 984.35             | 0.301                          | 1771.19            | 532.94             |
| A_68_P24134133 | chr5:139676870-139676914                          | NM_024451:269     | Sun1       | INSIDE                 | 0.333                                                        | 7.186                          | 1395.73            | 10029.60           | 2.39                           | 1226.25            | 2931.31            |
| A_68_P24134129 | chr5:139676494-139676538                          | NM_024451:-107    | Sun1       | PROMOTER               | 0.547                                                        | 0.278                          | 2355.64            | 653.84             | 0.152                          | 1695.71            | 257.66             |
| A_68_P24134128 | chr5:139676346-139676390                          | NM_024451:-255    | Sun1       | PROMOTER               | 0.552                                                        | 0.334                          | 2216.33            | 740.22             | 0.184                          | 1493.43            | 275.16             |
| A_68_P30368252 | chr15:79573047-79573091                           | NM_001205345:-102 | Sun2       | PROMOTER               | 0.38                                                         | 5.130                          | 2073.14            | 10635.10           | 1.948                          | 1762.98            | 3434.60            |
| A_68_P27542559 | chr10:128105989-128106033                         | NM_173733:4964    | Suox       | DOWNSTREAM             | 0.338                                                        | 13.369                         | 8718.14            | 116551.10          | 4.521                          | 7972.00            | 36039.49           |
| A_68_P27542562 | chr10:128106343-128106387                         | NM_173733:4610    | Suox       | DOWNSTREAM             | 0.461                                                        | 0.346                          | 1797.31            | 621.27             | 0.159                          | 1418.49            | 225.90             |
| A_68_P29605230 | chr14:52816435-52816479                           | NM_033618:458     | Supt16h    | INSIDE                 | 0.359                                                        | 14.921                         | 2830.37            | 42232.40           | 5.36                           | 2329.61            | 12487.65           |
| A_68_P29605237 | chr14:52817103-52817147                           | NM_033618:-210    | Supt16h    | PROMOTER               | 0.491                                                        | 3.078                          | 2303.84            | 7090.94            | 1.51                           | 2022.27            | 3053.78            |
| A_68_P31197210 | chr17:44914016-44914060                           | NM_178652:-81     | Supt3h     | PROMOTER               | 0.2                                                          | 20.449                         | 2123.79            | 43428.43           | 4.089                          | 1867.40            | 7636.72            |
| A_68_P27995861 | chr11:87550950-87550994                           | NM_009296:-94     | Supt4h1    | PROMOTER               | 0.23                                                         | 26.080                         | 2079.81            | 54241.14           | 6.002                          | 1854.30            | 11130.31           |
| A_68_P27995858 | chr11:87550476-87550520                           | NM_009296:-568    | Supt4h1    | PROMOTER               | 0.648                                                        | 0.648                          | 852.48             | 552.41             | 0.42                           | 691.43             | 290.42             |
| A_68_P21081132 | chr2:26771837-26771881                            | NM_013678:-82     | Surf2      | PROMOTER               | 0.419                                                        | 0.365                          | 1669.71            | 608.66             | 0.153                          | 1123.65            | 171.78             |
| A_68_P21081272 | chr2:26789177-26789221                            | NM_011512:-167    | Surf4      | DIVERGENT_PROMOTER     | 0.393                                                        | 0.425                          | 10136.32           | 4303.22            | 0.167                          | 6995.54            | 1166.56            |
| A_68_P21081268 | chr2:26788702-26788746                            | NM_011512:307     | Surf4      | INSIDE                 | 0.638                                                        | 2.782                          | 1016.38            | 2827.59            | 1.776                          | 899.72             | 1597.46            |
| A_68_P29024153 | chr13:49343267-49343311                           | NM_025491:244     | Susd3      | INSIDE                 | 0.524                                                        | 0.629                          | 828.18             | 520.52             | 0.329                          | 670.85             | 221.02             |
| A_68_P26843529 | chr9:113966624-113966668                          | NM_001101510:175  | Susd5      | INSIDE                 | 0.495                                                        | 3.427                          | 915.33             | 3136.92            | 1.695                          | 879.89             | 1491.49            |
| A_68_P32241633 | chrX:7651543-7651587                              | NM_011514:322     | Suv39h1    | INSIDE                 | 0.65                                                         | 4.203                          | 772.23             | 3245.64            | 2.734                          | 1065.32            | 2912.35            |
| A_68_P27952010 | chr11:79806374-79806418                           | NM_001163018:-211 | Suz12      | PROMOTER               | 0.573                                                        | 0.520                          | 1357.98            | 706.09             | 0.298                          | 1004.96            | 299.66             |
| A_68_P27952012 | chr11:79806597-79806641                           | NM_001163018:11   | Suz12      | INSIDE                 | 0.384                                                        | 1.585                          | 1560.51            | 2473.39            | 0.609                          | 1229.58            | 748.96             |
| A_68_P25239159 | chr7:82453955-82453999                            | NM_001109753:-704 | Sv2b       | PROMOTER               | 0.253                                                        | 13.494                         | 1864.28            | 25157.06           | 3.415                          | 1776.50            | 6065.86            |

| ProbeName      | Target position of probe on CpG island microarray | TargetID         | GeneSymbol | CpG island Description | Ratio of relative methylation (TiO <sub>2</sub> -NP/Vehicle) | Sham group                     |                    |                    | TiO <sub>2</sub> -H group      |                    |                    |
|----------------|---------------------------------------------------|------------------|------------|------------------------|--------------------------------------------------------------|--------------------------------|--------------------|--------------------|--------------------------------|--------------------|--------------------|
|                |                                                   |                  |            |                        |                                                              | Relative methylation (Cy5/Cy3) | Cy3 signal (Input) | Cy5 signal (MeDIP) | Relative methylation (Cy5/Cy3) | Cy3 signal (Input) | Cy5 signal (MeDIP) |
| A_68_P29244724 | chr13:96902709-96902753                           | NM_029210:-198   | Sv2c       | PROMOTER               | 0.62                                                         | 0.296                          | 7090.20            | 2097.89            | 0.183                          | 5648.62            | 1035.85            |
| A_68_P29244710 | chr13:96901056-96901100                           | NM_029210:1454   | Sv2c       | INSIDE                 | 0.583                                                        | 0.704                          | 4741.83            | 3339.71            | 0.411                          | 3585.88            | 1472.69            |
| A_68_P29244723 | chr13:96902535-96902579                           | NM_029210:-24    | Sv2c       | PROMOTER               | 0.343                                                        | 5.005                          | 1292.96            | 6471.90            | 1.719                          | 1057.08            | 1816.67            |
| A_68_P22949805 | chr4:58219063-58219107                            | NM_022814:384    | Svep1      | INSIDE                 | 0.358                                                        | 7.466                          | 1289.98            | 9631.17            | 2.675                          | 1016.98            | 2720.62            |
| A_68_P25126430 | chr7:59261254-59261298                            | NR_027704:-192   | Svip       | PROMOTER               | 0.257                                                        | 9.933                          | 6758.50            | 67131.00           | 2.552                          | 5763.62            | 14707.79           |
| A_68_P24001851 | chr5:114541342-114541386                          | NM_026805:25     | Svop       | INSIDE                 | 0.465                                                        | 12.756                         | 2929.99            | 37375.02           | 5.933                          | 2572.75            | 15264.66           |
| A_68_P25412183 | chr7:117365487-117365531                          | NM_009302:292    | Swap70     | INSIDE                 | 0.219                                                        | 23.750                         | 5107.12            | 121294.60          | 5.202                          | 4472.30            | 23264.24           |
| A_68_P25412179 | chr7:117365148-117365192                          | NM_009302:-46    | Swap70     | PROMOTER               | 0.381                                                        | 3.789                          | 2060.35            | 7806.15            | 1.445                          | 1757.78            | 2540.39            |
| A_68_P32791361 | chrX:159326363-159326407                          | NM_025932:10     | Syp1       | INSIDE                 | 0.289                                                        | 12.715                         | 788.75             | 10029.03           | 3.675                          | 1309.32            | 4811.62            |
| A_68_P26022398 | chr8:87396278-87396322                            | NM_001168244:144 | Syce2      | INSIDE                 | 0.423                                                        | 0.367                          | 3258.84            | 1194.90            | 0.155                          | 2207.30            | 342.71             |
| A_68_P26022397 | chr8:87396203-87396247                            | NM_001168244:68  | Syce2      | INSIDE                 | 0.204                                                        | 1.501                          | 7622.26            | 11440.23           | 0.307                          | 4769.98            | 1462.61            |
| A_68_P21890546 | chr2:178142021-178142065                          | NM_177191:321    | Sycp2      | INSIDE                 | 0.277                                                        | 11.108                         | 5967.97            | 66290.52           | 3.079                          | 4676.45            | 14396.86           |
| A_68_P21890548 | chr2:178142227-178142271                          | NM_177191:115    | Sycp2      | INSIDE                 | 0.356                                                        | 11.296                         | 7147.79            | 80743.11           | 4.021                          | 5733.90            | 23053.65           |
| A_68_P21890547 | chr2:178142154-178142198                          | NM_177191:187    | Sycp2      | INSIDE                 | 0.384                                                        | 5.678                          | 2012.08            | 11423.98           | 2.178                          | 1581.23            | 3443.22            |
| A_68_P27325555 | chr10:87922666-87922710                           | NM_011517:357    | Sycp3      | INSIDE                 | 0.289                                                        | 20.936                         | 4872.95            | 102020.80          | 6.056                          | 4351.11            | 26348.51           |
| A_68_P27325556 | chr10:87922749-87922793                           | NM_011517:439    | Sycp3      | INSIDE                 | 0.347                                                        | 21.086                         | 6259.31            | 131981.00          | 7.308                          | 4940.52            | 36106.55           |
| A_68_P27325554 | chr10:87922543-87922587                           | NM_011517:233    | Sycp3      | INSIDE                 | 0.434                                                        | 6.826                          | 1971.69            | 13458.42           | 2.962                          | 1655.42            | 4903.21            |
| A_68_P22611968 | chr3:145651227-145651271                          | NM_001166064:415 | Syde2      | INSIDE                 | 0.666                                                        | 4.458                          | 853.73             | 3806.05            | 2.971                          | 782.59             | 2324.98            |
| A_68_P24769159 | chr6:115085098-115085142                          | NM_013681:201    | Syn2       | INSIDE                 | 0.316                                                        | 0.487                          | 1505.60            | 732.78             | 0.154                          | 1241.74            | 190.72             |
| A_68_P24769158 | chr6:115084990-115085034                          | NM_013681:93     | Syn2       | INSIDE                 | 0.46                                                         | 0.550                          | 1339.45            | 736.48             | 0.253                          | 1046.67            | 264.52             |
| A_68_P26710370 | chr9:88377975-88378019                            | NM_019796:-761   | Syncrip    | PROMOTER               | 0.124                                                        | 38.068                         | 1508.99            | 57443.43           | 4.703                          | 1311.06            | 6165.33            |
| A_68_P26710354 | chr9:88376160-88376210                            | NM_019796:1051   | Syncrip    | INSIDE                 | 0.521                                                        | 0.210                          | 3214.22            | 675.19             | 0.109                          | 2237.69            | 244.70             |
| A_68_P28550368 | chr12:76919708-76919752                           | NM_001005510:426 | Syne2      | INSIDE                 | 0.359                                                        | 0.557                          | 1030.90            | 574.66             | 0.2                            | 873.08             | 174.60             |
| A_68_P28167342 | chr11:117671257-117671301                         | NM_009304:298    | Syngr2     | INSIDE                 | 0.549                                                        | 4.078                          | 964.68             | 3933.59            | 2.24                           | 888.40             | 1989.60            |
| A_68_P31099001 | chr17:24824425-24824469                           | NM_011522:2448   | Syngr3     | INSIDE                 | 0.287                                                        | 28.056                         | 8971.75            | 251707.60          | 8.065                          | 11775.36           | 94964.08           |
| A_68_P31020009 | chr17:5941768-5941812                             | NM_001113352:511 | Synj2      | INSIDE                 | 0.232                                                        | 0.412                          | 11320.76           | 4668.84            | 0.096                          | 7065.51            | 677.11             |
| A_68_P31020008 | chr17:5941641-5941685                             | NM_001113352:383 | Synj2      | INSIDE                 | 0.521                                                        | 0.289                          | 1802.63            | 521.06             | 0.151                          | 1374.25            | 206.83             |
| A_68_P25195705 | chr7:74903906-74903950                            | NM_183312:700    | Synn       | INSIDE                 | 0.562                                                        | 4.050                          | 1848.05            | 7485.45            | 2.274                          | 1473.41            | 3351.05            |
| A_68_P25195709 | chr7:74904507-74904551                            | NM_183312:100    | Synn       | INSIDE                 | 0.659                                                        | 0.223                          | 3588.25            | 798.57             | 0.147                          | 2521.00            | 369.91             |
| A_68_P31752323 | chr18:60755666-60755710                           | NM_177340:28271  | Synpo      | INSIDE                 | 0.377                                                        | 0.308                          | 2648.93            | 816.74             | 0.116                          | 1944.63            | 226.20             |
| A_68_P31752537 | chr18:60784125-60784169                           | NM_177340:-187   | Synpo      | PROMOTER               | 0.508                                                        | 0.550                          | 3208.71            | 1764.92            | 0.28                           | 2489.57            | 696.05             |
| A_68_P22411406 | chr3:108029457-108029501                          | NM_008596:39     | Syp12      | INSIDE                 | 0.374                                                        | 5.566                          | 2981.04            | 16592.25           | 2.083                          | 2211.77            | 4606.55            |
| A_68_P22411405 | chr3:108029325-108029369                          | NM_008596:171    | Syp12      | INSIDE                 | 0.641                                                        | 0.503                          | 4473.85            | 2250.19            | 0.322                          | 3493.37            | 1126.39            |
| A_68_P30427167 | chr15:89672007-89672051                           | NM_018803:263    | Syt10      | INSIDE                 | 0.339                                                        | 0.090                          | 10755.66           | 972.72             | 0.031                          | 7899.47            | 241.94             |
| A_68_P31923331 | chr19:4476940-4476984                             | NM_134164:181    | Syt12      | INSIDE                 | 0.18                                                         | 2.477                          | 2280.26            | 5647.72            | 0.447                          | 1761.04            | 787.26             |
| A_68_P31923328 | chr19:4476573-4476617                             | NM_134164:549    | Syt12      | INSIDE                 | 0.529                                                        | 0.361                          | 2442.89            | 882.16             | 0.191                          | 1747.21            | 333.84             |
| A_68_P31923329 | chr19:4476649-4476693                             | NM_134164:473    | Syt12      | INSIDE                 | 0.598                                                        | 0.235                          | 2195.87            | 517.01             | 0.141                          | 1524.74            | 214.63             |
| A_68_P21431327 | chr2:92755255-92755299                            | NM_030725:19     | Syt13      | INSIDE                 | 0.48                                                         | 5.720                          | 882.39             | 5047.34            | 2.743                          | 761.48             | 2088.81            |
| A_68_P20946922 | chr1:194862087-194862136                          | NM_181546:-219   | Syt14      | PROMOTER               | 0.115                                                        | 1.910                          | 6975.73            | 13320.24           | 0.22                           | 4013.16            | 881.17             |
| A_68_P20946920 | chr1:194861857-194861901                          | NM_181546:14     | Syt14      | INSIDE                 | 0.533                                                        | 5.146                          | 829.13             | 4266.34            | 2.745                          | 785.70             | 2156.72            |
| A_68_P20946924 | chr1:194862258-194862302                          | NM_181546:-388   | Syt14      | PROMOTER               | 0.661                                                        | 0.504                          | 5259.24            | 2650.57            | 0.333                          | 3658.86            | 1219.75            |
| A_68_P25458299 | chr7:125591289-125591333                          | NM_138649:-4244  | Syt17      | PROMOTER               | 0.386                                                        | 10.839                         | 2547.52            | 27613.11           | 4.188                          | 2302.25            | 9640.87            |
| A_68_P20634933 | chr1:136605811-136605855                          | NM_009307:62575  | Syt2       | INSIDE                 | 0.421                                                        | 5.078                          | 1897.53            | 9635.76            | 2.138                          | 1323.73            | 2830.76            |
| A_68_P20634931 | chr1:136605584-136605628                          | NM_009307:62349  | Syt2       | INSIDE                 | 0.594                                                        | 0.237                          | 1885.67            | 446.76             | 0.141                          | 1236.24            | 174.07             |
| A_68_P22386748 | chr3:103380204-103380248                          | NM_018800:1023   | Syt6       | INSIDE                 | 0.435                                                        | 4.069                          | 1559.63            | 6345.54            | 1.77                           | 1370.81            | 2426.49            |
| A_68_P31950560 | chr19:10500789-10500833                           | NM_018801:37231  | Syt7       | INSIDE                 | 0.614                                                        | 2.397                          | 1612.41            | 3865.74            | 1.473                          | 1281.14            | 1887.21            |

| ProbeName      | Target position of probe on CpG island microarray | TargetID           | GeneSymbol | CpG island Description | Ratio of relative methylation (TiO <sub>2</sub> -NP/Vehicle) | Sham group                     |                    |                    | TiO <sub>2</sub> -H group      |                    |                    |
|----------------|---------------------------------------------------|--------------------|------------|------------------------|--------------------------------------------------------------|--------------------------------|--------------------|--------------------|--------------------------------|--------------------|--------------------|
|                |                                                   |                    |            |                        |                                                              | Relative methylation (Cy5/Cy3) | Cy3 signal (Input) | Cy5 signal (MeDIP) | Relative methylation (Cy5/Cy3) | Cy3 signal (Input) | Cy5 signal (MeDIP) |
| A_68_P23240175 | chr4:118081682-118081726                          | NM_198170:164      | Szt2       | INSIDE                 | 0.604                                                        | 0.229                          | 2402.50            | 551.35             | 0.139                          | 1915.43            | 265.72             |
| A_68_P32958522 | chr17:8627015-8627059                             | NM_009309:-251     | T          | PROMOTER               | 0.425                                                        | 4.880                          | 1464.90            | 7149.03            | 2.074                          | 1082.31            | 2245.19            |
| A_68_P32958527 | chr17:8627631-8627675                             | NM_009309:365      | T          | INSIDE                 | 0.574                                                        | 0.194                          | 2641.09            | 513.10             | 0.111                          | 2000.46            | 222.90             |
| A_68_P32506209 | chrX:82819101-82819145                            | NM_025729:-238     | Tab3       | PROMOTER               | 0.469                                                        | 11.876                         | 1216.28            | 14444.67           | 5.565                          | 1540.83            | 8574.91            |
| A_68_P24221481 | chr6:7505151-7505195                              | NM_009311:102      | Tac1       | INSIDE                 | 0.405                                                        | 0.554                          | 1056.85            | 585.96             | 0.225                          | 897.41             | 201.57             |
| A_68_P24521963 | chr6:67485504-67485548                            | NM_020047:290      | Tacstd2    | INSIDE                 | 0.473                                                        | 0.375                          | 1348.90            | 506.48             | 0.177                          | 1002.42            | 177.89             |
| A_68_P20799887 | chr1:168309926-168309970                          | NM_030245:651      | Tada1      | INSIDE                 | 0.374                                                        | 0.353                          | 1882.85            | 665.09             | 0.132                          | 1366.92            | 180.43             |
| A_68_P23607900 | chr5:36826413-36826457                            | NM_001170454:500   | Tada2b     | INSIDE                 | 0.38                                                         | 4.776                          | 4833.82            | 23087.36           | 1.815                          | 3577.27            | 6493.85            |
| A_68_P24759109 | chr6:113327446-113327490                          | NM_133932:46       | Tada3      | INSIDE                 | 0.527                                                        | 6.313                          | 1269.55            | 8014.61            | 3.325                          | 1133.13            | 3767.78            |
| A_68_P23311001 | chr4:131830273-131830317                          | NM_025579:5        | Taf12      | INSIDE                 | 0.38                                                         | 28.479                         | 2299.70            | 65492.25           | 10.832                         | 2990.47            | 32391.58           |
| A_68_P27971718 | chr11:83286618-83286662                           | NM_027427:31       | Taf15      | INSIDE                 | 0.618                                                        | 11.464                         | 1383.49            | 15859.68           | 7.083                          | 1151.42            | 8155.26            |
| A_68_P26322118 | chr9:15110644-15110688                            | NM_029248:9        | Taf1d      | INSIDE                 | 0.577                                                        | 0.200                          | 2373.51            | 474.24             | 0.115                          | 1651.29            | 190.53             |
| A_68_P30230212 | chr15:54903756-54903800                           | NM_001081288:-71   | Taf2       | PROMOTER               | 0.3                                                          | 11.448                         | 1788.59            | 20475.17           | 3.433                          | 1766.33            | 6064.12            |
| A_68_P20998559 | chr2:9970073-9970117                              | NM_027748:142      | Taf3       | INSIDE                 | 0.346                                                        | 10.045                         | 2947.51            | 29609.12           | 3.476                          | 2396.69            | 8329.85            |
| A_68_P21900382 | chr2:179666703-179666747                          | NM_001081092:44627 | Taf4a      | INSIDE                 | 0.609                                                        | 5.157                          | 691.46             | 3565.60            | 3.14                           | 639.49             | 2007.82            |
| A_68_P26242940 | chr8:126544834-126544878                          | NM_133966:353      | Taf5l      | INSIDE                 | 0.393                                                        | 10.906                         | 1070.38            | 11674.08           | 4.29                           | 1010.88            | 4336.37            |
| A_68_P26242939 | chr8:126544720-126544764                          | NM_133966:467      | Taf5l      | INSIDE                 | 0.591                                                        | 10.690                         | 493.72             | 5277.67            | 6.321                          | 603.44             | 3814.54            |
| A_68_P32672214 | chrX:131010586-131010630                          | NM_028958:421      | Taf7l      | INSIDE                 | 0.045                                                        | 65.374                         | 1115.96            | 72954.09           | 2.942                          | 1597.35            | 4698.67            |
| A_68_P32672211 | chrX:131010176-131010220                          | NM_028958:831      | Taf7l      | INSIDE                 | 0.465                                                        | 3.786                          | 2288.45            | 8663.75            | 1.761                          | 2850.66            | 5018.73            |
| A_68_P32672217 | chrX:131010986-131011030                          | NM_028958:21       | Taf7l      | INSIDE                 | 0.455                                                        | 3.587                          | 757.16             | 2716.04            | 1.632                          | 1042.98            | 1701.90            |
| A_68_P32672209 | chrX:131010003-131010047                          | NM_028958:1005     | Taf7l      | INSIDE                 | 0.609                                                        | 2.368                          | 1744.11            | 4129.79            | 1.441                          | 2200.65            | 3172.10            |
| A_68_P29269476 | chr13:101421663-101421707                         | NM_001015889:123   | Taf9       | INSIDE                 | 0.582                                                        | 0.343                          | 2070.05            | 709.46             | 0.2                            | 1375.51            | 274.55             |
| A_68_P32583453 | chrX:103415136-103415180                          | NM_001001176:23    | Taf9b      | INSIDE                 | 0.427                                                        | 15.269                         | 675.90             | 10320.31           | 6.516                          | 796.47             | 5189.83            |
| A_68_P31023474 | chr17:7165620-7165665                             | NM_147155:-137     | Tagap1     | PROMOTER               | 0.465                                                        | 0.684                          | 5919.13            | 4048.81            | 0.318                          | 4413.67            | 1404.51            |
| A_68_P20833435 | chr1:174430368-174430412                          | NM_178598:14       | Tagln2     | INSIDE                 | 0.475                                                        | 0.433                          | 1115.02            | 483.17             | 0.206                          | 842.98             | 173.38             |
| A_68_P23223128 | chr4:114729001-114729045                          | NM_011527:-3109    | Tal1       | PROMOTER               | 0.508                                                        | 0.412                          | 2616.66            | 1077.58            | 0.209                          | 2009.19            | 420.00             |
| A_68_P23223131 | chr4:114729380-114729424                          | NM_011527:-2729    | Tal1       | PROMOTER               | 0.546                                                        | 2.588                          | 4268.67            | 11048.55           | 1.413                          | 3401.31            | 4806.60            |
| A_68_P28096908 | chr11:105451551-105451595                         | NM_181071:273      | Tanc2      | INSIDE                 | 0.432                                                        | 3.804                          | 3370.44            | 12821.32           | 1.642                          | 2675.98            | 4395.20            |
| A_68_P21265457 | chr2:61494997-61495041                            | NM_001164071:63865 | Tank       | DOWNSTREAM             | 0.358                                                        | 0.368                          | 1667.20            | 612.71             | 0.132                          | 1301.76            | 171.33             |
| A_68_P21265454 | chr2:61494500-61494549                            | NM_001164071:63371 | Tank       | DOWNSTREAM             | 0.296                                                        | 0.727                          | 1516.13            | 1101.96            | 0.215                          | 1234.38            | 265.80             |
| A_68_P27938548 | chr11:77420609-77420653                           | NM_144825:687      | Taok1      | INSIDE                 | 0.415                                                        | 0.283                          | 2526.22            | 715.70             | 0.118                          | 2014.47            | 236.88             |
| A_68_P27938551 | chr11:77420898-77420942                           | NM_144825:397      | Taok1      | INSIDE                 | 0.477                                                        | 0.605                          | 1353.50            | 819.02             | 0.289                          | 1199.59            | 346.38             |
| A_68_P31152726 | chr17:34341832-34341876                           | NM_011530:431      | Tap2       | INSIDE                 | 0.486                                                        | 0.480                          | 1209.72            | 580.66             | 0.233                          | 904.93             | 210.99             |
| A_68_P31150991 | chr17:34056894-34056938                           | NM_001025313:494   | Tapbp      | INSIDE                 | 0.549                                                        | 0.677                          | 2254.49            | 1527.17            | 0.372                          | 1627.88            | 605.47             |
| A_68_P31151041 | chr17:34066176-34066220                           | NM_001025313:9776  | Tapbp      | INSIDE                 | 0.632                                                        | 0.663                          | 1719.57            | 1140.76            | 0.419                          | 1139.16            | 477.62             |
| A_68_P23395558 | chr4:148000660-148000704                          | NM_001003898:423   | Tardbp     | INSIDE                 | 0.628                                                        | 2.963                          | 1168.97            | 3463.12            | 1.859                          | 954.82             | 1775.33            |
| A_68_P23416140 | chr4:151406689-151406733                          | NM_031867:5889     | Tas1r1     | INSIDE                 | 0.617                                                        | 3.249                          | 1622.87            | 5273.41            | 2.005                          | 1058.51            | 2122.32            |
| A_68_P23416139 | chr4:151406623-151406667                          | NM_031867:5955     | Tas1r1     | INSIDE                 | 0.42                                                         | 3.638                          | 2515.95            | 9151.97            | 1.527                          | 1718.84            | 2623.83            |
| A_68_P24760941 | chr6:113647011-113647055                          | NM_001033463:-460  | Tatdn2     | PROMOTER               | 0.278                                                        | 6.479                          | 1189.58            | 7707.06            | 1.799                          | 969.23             | 1743.35            |
| A_68_P20936016 | chr1:192886793-192886837                          | NM_001163421:-3    | Tatdn3     | DIVERGENT_PROMOTER     | 0.409                                                        | 5.793                          | 12163.44           | 70459.89           | 2.367                          | 11334.29           | 26832.08           |
| A_68_P24452215 | chr6:52664021-52664065                            | NM_025816:320      | Tax1bp1    | INSIDE                 | 0.418                                                        | 14.018                         | 3019.86            | 42331.38           | 5.853                          | 2942.36            | 17222.28           |
| A_68_P24452213 | chr6:52663843-52663887                            | NM_025816:142      | Tax1bp1    | INSIDE                 | 0.572                                                        | 0.656                          | 1253.16            | 822.40             | 0.375                          | 1078.99            | 405.12             |
| A_68_P23749456 | chr5:64551627-64551671                            | NM_019636:199      | Tbc1d1     | INSIDE                 | 0.195                                                        | 35.635                         | 8568.08            | 305321.70          | 6.941                          | 9715.48            | 67431.21           |
| A_68_P23749879 | chr5:64621748-64621793                            | NM_019636:70321    | Tbc1d1     | INSIDE                 | 0.336                                                        | 10.562                         | 6386.03            | 67452.32           | 3.55                           | 6537.95            | 23211.67           |
| A_68_P23749454 | chr5:64551417-64551461                            | NM_019636:-11      | Tbc1d1     | PROMOTER               | 0.642                                                        | 2.866                          | 1827.38            | 5236.48            | 1.841                          | 1511.04            | 2781.79            |
| A_68_P23749880 | chr5:64621862-64621906                            | NM_019636:70435    | Tbc1d1     | INSIDE                 | 0.162                                                        | 1.514                          | 1606.75            | 2433.17            | 0.246                          | 1340.78            | 329.25             |



| ProbeName      | Target position of probe on CpG island microarray | TargetID         | GeneSymbol | CpG island Description | Ratio of relative methylation (TiO <sub>2</sub> -NP/Vehicle) | Sham group                     |                    |                    | TiO <sub>2</sub> -H group      |                    |                    |
|----------------|---------------------------------------------------|------------------|------------|------------------------|--------------------------------------------------------------|--------------------------------|--------------------|--------------------|--------------------------------|--------------------|--------------------|
|                |                                                   |                  |            |                        |                                                              | Relative methylation (Cy5/Cy3) | Cy3 signal (Input) | Cy5 signal (MeDIP) | Relative methylation (Cy5/Cy3) | Cy3 signal (Input) | Cy5 signal (MeDIP) |
| A_68_P23608585 | chr5:36924742-36924786                            | NM_133910:282    | Tbcd14     | INSIDE                 | 0.344                                                        | 6.075                          | 12143.67           | 73773.52           | 2.093                          | 9588.68            | 20065.82           |
| A_68_P23608244 | chr5:36873039-36873083                            | NM_001113364:212 | Tbcd14     | INSIDE                 | 0.612                                                        | 0.469                          | 2138.78            | 1002.86            | 0.287                          | 1537.10            | 441.23             |
| A_68_P23608581 | chr5:36924292-36924336                            | NM_133910:732    | Tbcd14     | INSIDE                 | 0.446                                                        | 0.637                          | 4895.51            | 3116.78            | 0.284                          | 3849.15            | 1092.07            |
| A_68_P27468585 | chr10:114688513-114688557                         | NM_025706:15     | Tbcd15     | INSIDE                 | 0.497                                                        | 0.354                          | 1244.04            | 440.56             | 0.176                          | 956.59             | 168.42             |
| A_68_P27468588 | chr10:114688762-114688806                         | NM_025706:-235   | Tbcd15     | PROMOTER               | 0.66                                                         | 0.463                          | 1296.89            | 600.39             | 0.305                          | 937.61             | 286.37             |
| A_68_P28176626 | chr11:119089661-119089705                         | NM_172443:131    | Tbcd16     | INSIDE                 | 0.364                                                        | 6.236                          | 2157.65            | 13454.20           | 2.268                          | 1676.01            | 3800.57            |
| A_68_P23702720 | chr5:54200876-54200920                            | NM_144517:33     | Tbcd19     | INSIDE                 | 0.54                                                         | 0.342                          | 1561.96            | 533.96             | 0.185                          | 1188.69            | 219.42             |
| A_68_P21748557 | chr2:152119766-152119810                          | NM_024196:181    | Tbcd20     | INSIDE                 | 0.458                                                        | 12.090                         | 3509.40            | 42427.00           | 5.534                          | 3204.15            | 17731.53           |
| A_68_P21748558 | chr2:152119855-152119899                          | NM_024196:269    | Tbcd20     | INSIDE                 | 0.471                                                        | 7.793                          | 3346.34            | 26078.70           | 3.672                          | 2780.79            | 10210.81           |
| A_68_P21748556 | chr2:152119601-152119645                          | NM_024196:15     | Tbcd20     | INSIDE                 | 0.256                                                        | 9.321                          | 521.77             | 4863.34            | 2.388                          | 428.37             | 1023.14            |
| A_68_P30405824 | chr15:86045163-86045207                           | NM_145476:296    | Tbcd22a    | INSIDE                 | 0.083                                                        | 3.410                          | 4843.13            | 16515.90           | 0.283                          | 3426.01            | 970.03             |
| A_68_P30405823 | chr15:86045014-86045058                           | NM_145476:148    | Tbcd22a    | INSIDE                 | 0.188                                                        | 2.156                          | 5983.50            | 12900.16           | 0.406                          | 3919.00            | 1591.17            |
| A_68_P31096039 | chr17:24342230-24342274                           | NM_001163847:255 | Tbcd24     | INSIDE                 | 0.575                                                        | 0.394                          | 13422.85           | 5292.28            | 0.227                          | 8641.67            | 1959.23            |
| A_68_P31096042 | chr17:24342530-24342574                           | NM_001163847:-45 | Tbcd24     | PROMOTER               | 0.35                                                         | 5.291                          | 1246.79            | 6596.58            | 1.85                           | 1010.18            | 1868.70            |
| A_68_P26717019 | chr9:90165367-90165411                            | NM_194334:219    | Tbcd2b     | INSIDE                 | 0.587                                                        | 0.502                          | 1679.92            | 843.73             | 0.295                          | 1363.08            | 402.06             |
| A_68_P27502792 | chr10:120747561-120747605                         | NM_029057:663    | Tbcd30     | INSIDE                 | 0.646                                                        | 2.864                          | 2890.32            | 8277.53            | 1.849                          | 2310.94            | 4273.08            |
| A_68_P31232583 | chr17:51318678-51318722                           | NM_028162:-26    | Tbcd5      | PROMOTER               | 0.349                                                        | 8.673                          | 1547.86            | 13425.11           | 3.027                          | 1375.87            | 4164.15            |
| A_68_P29236942 | chr13:95558754-95558798                           | NM_009321:-121   | Tbeca      | PROMOTER               | 0.262                                                        | 18.244                         | 2742.42            | 50032.37           | 4.784                          | 2383.12            | 11400.63           |
| A_68_P25030460 | chr7:31017038-31017082                            | NM_025548:-12    | Tbecb      | DIVERGENT_PROMOTER     | 0.371                                                        | 0.370                          | 2003.76            | 741.66             | 0.137                          | 1431.88            | 196.66             |
| A_68_P25030456 | chr7:31016600-31016644                            | NM_025548:426    | Tbecb      | INSIDE                 | 0.51                                                         | 0.301                          | 1744.04            | 525.35             | 0.154                          | 1191.04            | 182.97             |
| A_68_P31209391 | chr17:47027623-47027667                           | NM_178385:75     | Tbecc      | INSIDE                 | 0.518                                                        | 0.276                          | 1913.68            | 527.85             | 0.143                          | 1376.31            | 196.79             |
| A_68_P30600190 | chr16:22857403-22857447                           | NM_001081368:218 | Tbecd1     | INSIDE                 | 0.343                                                        | 0.311                          | 2055.14            | 638.28             | 0.107                          | 1630.40            | 173.79             |
| A_68_P28836851 | chr13:14131718-14131762                           | NM_178337:127    | Tbece      | INSIDE                 | 0.48                                                         | 1.452                          | 3653.01            | 5304.49            | 0.698                          | 3015.52            | 2103.49            |
| A_68_P22538542 | chr3:132347071-132347115                          | NM_173032:-15    | Tбек       | DIVERGENT_PROMOTER     | 0.592                                                        | 0.266                          | 2651.91            | 706.10             | 0.158                          | 2003.10            | 315.72             |
| A_68_P27504343 | chr10:121023890-121023934                         | NM_019786:-62    | Tbk1       | PROMOTER               | 0.528                                                        | 11.528                         | 1246.05            | 14364.42           | 6.082                          | 1160.29            | 7056.93            |
| A_68_P28048904 | chr11:97000172-97000216                           | NM_198100:10832  | Tbkbp1     | INSIDE                 | 0.25                                                         | 14.358                         | 971.03             | 13942.24           | 3.596                          | 860.94             | 3096.24            |
| A_68_P28048905 | chr11:97000299-97000343                           | NM_198100:10706  | Tbkbp1     | INSIDE                 | 0.259                                                        | 8.875                          | 1054.08            | 9355.28            | 2.296                          | 922.77             | 2118.37            |
| A_68_P21986766 | chr3:21976041-21976085                            | NM_030732:489    | Tbl1xr1    | INSIDE                 | 0.569                                                        | 4.628                          | 1710.11            | 7914.53            | 2.631                          | 1456.55            | 3832.84            |
| A_68_P24114953 | chr5:135624970-135625015                          | NM_013763:-588   | Tbl2       | PROMOTER               | 0.242                                                        | 1.909                          | 3553.24            | 6783.82            | 0.462                          | 2916.28            | 1346.09            |
| A_68_P21266439 | chr2:61649898-61649942                            | NM_009322:7411   | Tbr1       | INSIDE                 | 0.63                                                         | 4.145                          | 488.29             | 2023.74            | 2.612                          | 449.65             | 1174.31            |
| A_68_P21266476 | chr2:61654143-61654187                            | NM_009322:11655  | Tbr1       | DOWNSTREAM             | 0.5                                                          | 3.396                          | 795.05             | 2699.89            | 1.699                          | 758.19             | 1288.19            |
| A_68_P21266440 | chr2:61650101-61650145                            | NM_009322:7613   | Tbr1       | INSIDE                 | 0.524                                                        | 3.542                          | 585.62             | 2074.53            | 1.858                          | 525.83             | 976.85             |
| A_68_P30580602 | chr16:18586865-18586909                           | NM_011532:176    | Tbx1       | INSIDE                 | 0.503                                                        | 7.133                          | 2128.82            | 15184.47           | 3.588                          | 1960.73            | 7035.55            |
| A_68_P30580630 | chr16:18590465-18590509                           | NM_011532:-3424  | Tbx1       | PROMOTER               | 0.514                                                        | 0.697                          | 1426.75            | 994.92             | 0.358                          | 1070.75            | 383.82             |
| A_68_P22363128 | chr3:99057574-99057618                            | NM_009323:-86    | Tbx15      | PROMOTER               | 0.295                                                        | 8.407                          | 5320.47            | 44730.30           | 2.477                          | 4922.61            | 12195.54           |
| A_68_P27985642 | chr11:85658143-85658187                           | NM_009324:12048  | Tbx2       | DOWNSTREAM             | 0.447                                                        | 0.263                          | 2040.30            | 537.52             | 0.118                          | 1483.65            | 174.86             |
| A_68_P27985546 | chr11:85647033-85647077                           | NM_009324:938    | Tbx2       | INSIDE                 | 0.458                                                        | 8.801                          | 4343.31            | 38223.78           | 4.028                          | 3406.52            | 13722.09           |
| A_68_P27985620 | chr11:85655489-85655533                           | NM_009324:9394   | Tbx2       | DOWNSTREAM             | 0.609                                                        | 5.313                          | 1817.14            | 9653.90            | 3.236                          | 1580.19            | 5113.47            |
| A_68_P27985536 | chr11:85645744-85645788                           | NM_009324:-350   | Tbx2       | PROMOTER               | 0.443                                                        | 3.398                          | 2950.93            | 10026.32           | 1.505                          | 2242.07            | 3373.90            |
| A_68_P28048726 | chr11:96976651-96976695                           | NM_019507:-27    | Tbx21      | PROMOTER               | 0.59                                                         | 0.294                          | 1767.70            | 519.82             | 0.174                          | 1464.88            | 254.26             |
| A_68_P24033996 | chr5:120121006-120121050                          | NM_011535:351    | Tbx3       | INSIDE                 | 0.477                                                        | 3.672                          | 3781.07            | 13883.47           | 1.751                          | 2869.98            | 5025.96            |
| A_68_P24034076 | chr5:120130713-120130757                          | NM_011535:10057  | Tbx3       | INSIDE                 | 0.535                                                        | 0.378                          | 1455.07            | 550.12             | 0.202                          | 1177.54            | 238.07             |
| A_68_P24033995 | chr5:120120847-120120895                          | NM_011535:193    | Tbx3       | INSIDE                 | 0.57                                                         | 0.202                          | 2220.12            | 447.71             | 0.115                          | 1498.71            | 172.39             |
| A_68_P27288939 | chr10:80795142-80795186                           | NM_009325:3689   | Tbxa2r     | INSIDE                 | 0.641                                                        | 3.761                          | 891.23             | 3351.91            | 2.412                          | 730.81             | 1763.09            |
| A_68_P27288944 | chr10:80795734-80795778                           | NM_009325:4281   | Tbxa2r     | INSIDE                 | 0.379                                                        | 3.637                          | 3047.87            | 11085.19           | 1.378                          | 2069.68            | 2852.34            |
| A_68_P21912035 | chr2:181415320-181415364                          | NM_009326:328    | Tcea2      | INSIDE                 | 0.375                                                        | 0.438                          | 1755.11            | 768.50             | 0.164                          | 1293.50            | 212.48             |

| ProbeName      | Target position of probe on CpG island microarray | TargetID           | GeneSymbol | CpG island Description | Ratio of relative methylation (TiO <sub>2</sub> -NP/Vehicle) | Sham group                     |                    |                    | TiO <sub>2</sub> -H group      |                    |                    |
|----------------|---------------------------------------------------|--------------------|------------|------------------------|--------------------------------------------------------------|--------------------------------|--------------------|--------------------|--------------------------------|--------------------|--------------------|
|                |                                                   |                    |            |                        |                                                              | Relative methylation (Cy5/Cy3) | Cy3 signal (Input) | Cy5 signal (MeDIP) | Relative methylation (Cy5/Cy3) | Cy3 signal (Input) | Cy5 signal (MeDIP) |
| A_68_P23332903 | chr4:135804530-135804574                          | NM_011542:681      | Tcea3      | INSIDE                 | 0.048                                                        | 1.826                          | 3260.77            | 5953.46            | 0.088                          | 2214.32            | 195.60             |
| A_68_P23332904 | chr4:135804629-135804673                          | NM_011542:779      | Tcea3      | INSIDE                 | 0.104                                                        | 2.007                          | 9144.81            | 18354.43           | 0.209                          | 6751.74            | 1409.41            |
| A_68_P32806692 | chrX:162947996-162948040                          | NM_001007577:392   | Tceanc     | INSIDE                 | 0.396                                                        | 5.439                          | 1079.01            | 5868.45            | 2.153                          | 1260.43            | 2713.48            |
| A_68_P23331724 | chr4:135577368-135577412                          | NM_013736:174      | Tceb3      | INSIDE                 | 0.182                                                        | 20.897                         | 4745.41            | 99163.77           | 3.811                          | 4095.71            | 15608.79           |
| A_68_P23331727 | chr4:135577835-135577879                          | NM_013736:-292     | Tceb3      | PROMOTER               | 0.461                                                        | 0.599                          | 2895.09            | 1735.37            | 0.276                          | 1945.71            | 537.09             |
| A_68_P31655789 | chr18:42671379-42671423                           | NM_001039474:260   | Tceerg1    | INSIDE                 | 0.245                                                        | 18.512                         | 9172.13            | 169792.70          | 4.538                          | 13650.79           | 61940.73           |
| A_68_P31655791 | chr18:42671723-42671767                           | NM_001039474:604   | Tceerg1    | INSIDE                 | 0.667                                                        | 2.980                          | 2106.68            | 6277.19            | 1.986                          | 1697.33            | 3371.33            |
| A_68_P25571662 | chr7:145589207-145589251                          | NM_183289:185      | Tceerg11   | INSIDE                 | 0.219                                                        | 53.499                         | 2890.62            | 154645.50          | 11.702                         | 3051.36            | 35707.91           |
| A_68_P25571660 | chr7:145588945-145588989                          | NM_183289:447      | Tceerg11   | INSIDE                 | 0.409                                                        | 0.226                          | 2633.77            | 594.36             | 0.092                          | 1941.16            | 178.96             |
| A_68_P26626138 | chr9:71959964-71960008                            | NM_011544:-360     | Tcf12      | PROMOTER               | 0.338                                                        | 7.084                          | 1883.56            | 13343.23           | 2.393                          | 1771.55            | 4239.38            |
| A_68_P26626136 | chr9:71959653-71959697                            | NM_011544:-48      | Tcf12      | PROMOTER               | 0.527                                                        | 3.979                          | 528.68             | 2103.83            | 2.098                          | 448.27             | 940.63             |
| A_68_P31159487 | chr17:33653700-33653744                           | NM_001163763:47    | Tcf19      | INSIDE                 | 0.313                                                        | 6.385                          | 2048.94            | 13081.55           | 2                              | 1570.11            | 3140.89            |
| A_68_P30385400 | chr15:82742401-82742445                           | NM_001114140:142   | Tcf20      | INSIDE                 | 0.409                                                        | 0.500                          | 5541.12            | 2771.74            | 0.205                          | 3630.93            | 743.61             |
| A_68_P26239530 | chr8:125898229-125898273                          | NM_001037877:516   | Tcf25      | INSIDE                 | 0.332                                                        | 0.391                          | 2794.84            | 1093.94            | 0.13                           | 1968.05            | 255.60             |
| A_68_P26239531 | chr8:125898300-125898344                          | NM_001037877:588   | Tcf25      | INSIDE                 | 0.432                                                        | 8.630                          | 11570.42           | 99857.40           | 3.729                          | 8980.69            | 33485.36           |
| A_68_P26239529 | chr8:125898146-125898191                          | NM_001037877:434   | Tcf25      | INSIDE                 | 0.557                                                        | 0.535                          | 3226.03            | 1726.65            | 0.298                          | 2447.20            | 729.45             |
| A_68_P26239532 | chr8:125898381-125898425                          | NM_001037877:668   | Tcf25      | INSIDE                 | 0.125                                                        | 3.254                          | 1421.78            | 4625.90            | 0.406                          | 968.17             | 392.99             |
| A_68_P24543633 | chr6:72738096-72738140                            | NM_001079822:832   | Tcf711     | INSIDE                 | 0.116                                                        | 19.252                         | 3388.56            | 65237.42           | 2.242                          | 2764.83            | 6200.11            |
| A_68_P24543644 | chr6:72739438-72739482                            | NM_001079822:-510  | Tcf711     | PROMOTER               | 0.269                                                        | 0.462                          | 2844.61            | 1314.03            | 0.124                          | 1927.43            | 239.32             |
| A_68_P32196178 | chr19:55817586-55817630                           | NM_001142918:1309  | Tcf712     | INSIDE                 | 0.105                                                        | 3.733                          | 4010.11            | 14968.30           | 0.392                          | 2598.80            | 1019.38            |
| A_68_P32196169 | chr19:55816232-55816276                           | NM_001142918:-45   | Tcf712     | PROMOTER               | 0.192                                                        | 10.882                         | 4572.26            | 49756.32           | 2.094                          | 4259.01            | 8917.84            |
| A_68_P32196175 | chr19:55817146-55817190                           | NM_001142918:869   | Tcf712     | INSIDE                 | 0.473                                                        | 0.249                          | 2300.40            | 571.72             | 0.118                          | 1487.47            | 175.00             |
| A_68_P28974164 | chr13:40824040-40824084                           | NM_001122948:1750  | Tcfap2a    | INSIDE                 | 0.27                                                         | 13.043                         | 3946.53            | 51473.22           | 3.519                          | 3196.59            | 11248.19           |
| A_68_P28974119 | chr13:40818320-40818364                           | NM_001122948:7470  | Tcfap2a    | INSIDE                 | 0.38                                                         | 0.509                          | 4239.38            | 2156.20            | 0.193                          | 2816.68            | 544.65             |
| A_68_P28974187 | chr13:40826726-40826770                           | NM_001122948:-936  | Tcfap2a    | PROMOTER               | 0.394                                                        | 6.289                          | 3512.43            | 22088.26           | 2.481                          | 3030.25            | 7516.84            |
| A_68_P28974246 | chr13:40833476-40833520                           | NM_011547:-4306    | Tcfap2a    | PROMOTER               | 0.102                                                        | 1.481                          | 1420.29            | 2103.33            | 0.15                           | 1260.51            | 189.65             |
| A_68_P28974208 | chr13:40829120-40829164                           | NM_001122948:-3330 | Tcfap2a    | PROMOTER               | 0.377                                                        | 1.579                          | 1145.92            | 1809.85            | 0.595                          | 1030.74            | 613.26             |
| A_68_P21864915 | chr2:172375828-172375872                          | NM_001159696:-640  | Tcfap2c    | PROMOTER               | 0.377                                                        | 5.141                          | 2122.54            | 10912.07           | 1.937                          | 1786.69            | 3461.55            |
| A_68_P21864909 | chr2:172375260-172375304                          | NM_001159696:-1208 | Tcfap2c    | PROMOTER               | 0.508                                                        | 4.774                          | 857.80             | 4095.00            | 2.425                          | 673.51             | 1633.23            |
| A_68_P21864924 | chr2:172377062-172377106                          | NM_001159696:594   | Tcfap2c    | INSIDE                 | 0.657                                                        | 0.364                          | 4544.19            | 1656.14            | 0.24                           | 3087.93            | 739.58             |
| A_68_P21864923 | chr2:172376959-172377003                          | NM_001159696:490   | Tcfap2c    | INSIDE                 | 0.29                                                         | 2.164                          | 7458.25            | 16141.87           | 0.628                          | 5449.51            | 3419.99            |
| A_68_P30510788 | chr16:4558960-4559004                             | NM_031182:738      | Tcfap4     | INSIDE                 | 0.492                                                        | 0.203                          | 4811.34            | 977.90             | 0.1                            | 3391.16            | 338.79             |
| A_68_P30510674 | chr16:4542026-4542070                             | NM_031182:17672    | Tcfap4     | DOWNSTREAM             | 0.066                                                        | 5.396                          | 691.83             | 3733.47            | 0.356                          | 575.94             | 204.89             |
| A_68_P30486392 | chr15:100382126-100382170                         | NM_033476:230      | Tcfcp2     | INSIDE                 | 0.604                                                        | 3.330                          | 646.72             | 2153.59            | 2.01                           | 565.17             | 1136.03            |
| A_68_P31213969 | chr17:47875277-47875321                           | NM_001161723:419   | Tcfepb     | INSIDE                 | 0.64                                                         | 6.032                          | 367.39             | 2216.08            | 3.859                          | 322.20             | 1243.24            |
| A_68_P22336409 | chr3:93249587-93249631                            | NM_001163098:3357  | Tchh       | INSIDE                 | 0.395                                                        | 0.086                          | 8077.76            | 692.50             | 0.034                          | 5725.83            | 193.82             |
| A_68_P22336429 | chr3:93251869-93251913                            | NM_001163098:5639  | Tchh       | INSIDE                 | 0.471                                                        | 0.212                          | 3971.15            | 840.83             | 0.1                            | 3045.14            | 303.73             |
| A_68_P31120338 | chr17:28217573-28217617                           | NM_001085555:-10   | Tcp11      | PROMOTER               | 0.346                                                        | 13.584                         | 4030.36            | 54748.28           | 4.702                          | 3008.57            | 14146.85           |
| A_68_P31120334 | chr17:28216998-28217042                           | NM_013687:509      | Tcp11      | INSIDE                 | 0.404                                                        | 0.615                          | 802.42             | 493.40             | 0.249                          | 695.30             | 172.80             |
| A_68_P31201639 | chr17:45672060-45672104                           | NM_013688:11700    | Tete1      | INSIDE                 | 0.517                                                        | 3.720                          | 1149.43            | 4276.04            | 1.924                          | 954.42             | 1836.61            |
| A_68_P31056399 | chr17:13898251-13898295                           | NM_022311:129      | Tete2      | INSIDE                 | 0.433                                                        | 4.769                          | 2961.93            | 14124.00           | 2.064                          | 2334.14            | 4816.75            |
| A_68_P31056398 | chr17:13898109-13898153                           | NM_022311:271      | Tete2      | INSIDE                 | 0.602                                                        | 2.569                          | 1940.06            | 4983.53            | 1.547                          | 1809.67            | 2799.29            |
| A_68_P32109943 | chr19:40686882-40686926                           | NM_026260:-199     | Tctn3      | PROMOTER               | 0.613                                                        | 0.575                          | 970.42             | 557.89             | 0.352                          | 798.91             | 281.58             |
| A_68_P28678695 | chr12:101122821-101122865                         | NM_028354:118      | Tdp1       | INSIDE                 | 0.415                                                        | 7.347                          | 533.18             | 3917.09            | 3.047                          | 461.07             | 1405.04            |
| A_68_P32203265 | chr19:56896867-56896911                           | NM_001002238:-3810 | Tdrd1      | DIVERGENT_PROMOTER     | 0.66                                                         | 0.222                          | 2265.84            | 503.88             | 0.147                          | 1771.15            | 260.15             |
| A_68_P32203282 | chr19:56901047-56901091                           | NM_001002241:-4133 | Tdrd1      | PROMOTER               | 0.501                                                        | 3.517                          | 1489.84            | 5240.28            | 1.763                          | 1170.22            | 2063.39            |

| ProbeName      | Target position of probe on CpG island microarray | TargetID          | GeneSymbol | CpG island Description | Ratio of relative methylation (TiO <sub>2</sub> -NP/Vehicle) | Sham group                     |                    |                    | TiO <sub>2</sub> -H group      |                    |                    |
|----------------|---------------------------------------------------|-------------------|------------|------------------------|--------------------------------------------------------------|--------------------------------|--------------------|--------------------|--------------------------------|--------------------|--------------------|
|                |                                                   |                   |            |                        |                                                              | Relative methylation (Cy5/Cy3) | Cy3 signal (Input) | Cy5 signal (MeDIP) | Relative methylation (Cy5/Cy3) | Cy3 signal (Input) | Cy5 signal (MeDIP) |
| A_68_P25049869 | chr7:36322564-36322608                            | NM_028034:177     | Tdrd12     | INSIDE                 | 0.619                                                        | 3.598                          | 1204.97            | 4335.94            | 2.229                          | 882.05             | 1965.80            |
| A_68_P29789069 | chr14:87817144-87817188                           | NM_172605:777     | Tdrd3      | INSIDE                 | 0.209                                                        | 2.165                          | 848.45             | 1836.84            | 0.452                          | 772.94             | 349.11             |
| A_68_P20742449 | chr1:158233625-158233669                          | NM_001134741:-167 | Tdrd5      | DIVERGENT_PROMOTER     | 0.289                                                        | 29.999                         | 2710.44            | 81311.18           | 8.673                          | 2484.37            | 21545.74           |
| A_68_P31190361 | chr17:43766788-43766832                           | NM_001161366:438  | Tdrd6      | INSIDE                 | 0.434                                                        | 4.654                          | 1113.03            | 5179.56            | 2.022                          | 904.62             | 1828.91            |
| A_68_P22338876 | chr3:94217322-94217366                            | NM_028307:105     | Tdrkh      | INSIDE                 | 0.513                                                        | 0.409                          | 9800.19            | 4008.53            | 0.21                           | 6340.61            | 1330.42            |
| A_68_P25091865 | chr7:52471363-52471407                            | NM_011565:262     | Tead2      | INSIDE                 | 0.479                                                        | 0.334                          | 5420.27            | 1810.59            | 0.16                           | 3889.48            | 621.76             |
| A_68_P31121999 | chr17:28487626-28487670                           | NM_001098226:-103 | Tead3      | PROMOTER               | 0.414                                                        | 5.045                          | 4520.81            | 22806.81           | 2.09                           | 3213.02            | 6714.37            |
| A_68_P31121931 | chr17:28478403-28478447                           | NM_001204156:8867 | Tead3      | INSIDE                 | 0.58                                                         | 0.415                          | 1782.98            | 740.05             | 0.241                          | 1244.01            | 299.29             |
| A_68_P31122000 | chr17:28487865-28487909                           | NM_011566:-136    | Tead3      | PROMOTER               | 0.585                                                        | 0.264                          | 4560.45            | 1203.48            | 0.154                          | 3076.88            | 475.11             |
| A_68_P24160101 | chr5:144984767-144984811                          | NM_027410:-341    | Tecpr1     | PROMOTER               | 0.651                                                        | 2.954                          | 1297.78            | 3833.00            | 1.923                          | 1042.01            | 2003.51            |
| A_68_P28740917 | chr12:112127699-112127743                         | NM_001081057:247  | Tecpr2     | INSIDE                 | 0.603                                                        | 0.694                          | 1552.07            | 1077.29            | 0.419                          | 1254.33            | 525.14             |
| A_68_P26015636 | chr8:86118488-86118532                            | NM_027179:-120    | Tecr       | PROMOTER               | 0.458                                                        | 9.145                          | 1098.59            | 10046.78           | 4.191                          | 873.61             | 3661.07            |
| A_68_P30379756 | chr15:81641379-81641423                           | NM_017376:-443    | Tef        | PROMOTER               | 0.168                                                        | 17.378                         | 10654.80           | 185160.20          | 2.923                          | 10571.02           | 30903.49           |
| A_68_P30379760 | chr15:81641863-81641907                           | NM_017376:41      | Tef        | INSIDE                 | 0.412                                                        | 5.676                          | 1001.47            | 5684.48            | 2.337                          | 917.13             | 2143.06            |
| A_68_P26082617 | chr8:97844517-97844561                            | NM_028532:9026    | Tepp       | INSIDE                 | 0.434                                                        | 0.324                          | 3486.29            | 1128.07            | 0.14                           | 2599.44            | 365.02             |
| A_68_P22349233 | chr3:96218809-96218853                            | NR_001579:-74     | Terc       | PROMOTER               | 0.662                                                        | 0.192                          | 2942.58            | 564.18             | 0.127                          | 2313.97            | 293.88             |
| A_68_P26143096 | chr8:109620241-109620285                          | NM_009353:183     | Terf2      | INSIDE                 | 0.376                                                        | 17.207                         | 4723.60            | 81278.80           | 6.467                          | 3894.76            | 25186.26           |
| A_68_P24024080 | chr5:118478322-118478366                          | NM_021344:512     | Tesc       | INSIDE                 | 0.454                                                        | 10.452                         | 1030.87            | 10774.63           | 4.748                          | 938.17             | 4454.18            |
| A_68_P24024083 | chr5:118478594-118478638                          | NM_021344:784     | Tesc       | INSIDE                 | 0.549                                                        | 7.559                          | 4420.04            | 33410.55           | 4.15                           | 3856.94            | 16007.83           |
| A_68_P22543376 | chr3:133207147-133207191                          | NM_001040400:186  | Tet2       | INSIDE                 | 0.44                                                         | 0.189                          | 4010.45            | 759.75             | 0.083                          | 3200.21            | 266.50             |
| A_68_P22543381 | chr3:133207644-133207688                          | NM_001040400:-312 | Tet2       | PROMOTER               | 0.527                                                        | 2.680                          | 1937.46            | 5191.86            | 1.412                          | 1619.33            | 2287.00            |
| A_68_P22900481 | chr4:48486343-48486387                            | NM_172304:-70     | Tex10      | PROMOTER               | 0.614                                                        | 4.002                          | 582.42             | 2330.93            | 2.459                          | 569.63             | 1400.81            |
| A_68_P26504312 | chr9:50369341-50369385                            | NM_025687:11      | Tex12      | INSIDE                 | 0.601                                                        | 5.524                          | 1744.63            | 9636.69            | 3.322                          | 1491.29            | 4953.83            |
| A_68_P28102658 | chr11:106473614-106473658                         | NM_198292:608     | Tex2       | INSIDE                 | 0.175                                                        | 0.629                          | 2316.62            | 1457.52            | 0.11                           | 1521.27            | 167.36             |
| A_68_P26804666 | chr9:106588275-106588319                          | NM_001081654:-17  | Tex264     | PROMOTER               | 0.547                                                        | 4.292                          | 1944.94            | 8346.91            | 2.346                          | 1489.94            | 3495.53            |
| A_68_P26804663 | chr9:106587992-106588036                          | NM_011573:-16     | Tex264     | PROMOTER               | 0.644                                                        | 2.753                          | 1150.34            | 3166.63            | 1.772                          | 959.85             | 1701.16            |
| A_68_P26804662 | chr9:106587823-106587867                          | NM_011573:154     | Tex264     | INSIDE                 | 0.302                                                        | 7.160                          | 494.40             | 3539.94            | 2.164                          | 461.63             | 999.07             |
| A_68_P26628115 | chr9:72339784-72339828                            | NM_009359:-43     | Tex9       | PROMOTER               | 0.611                                                        | 0.479                          | 923.58             | 442.10             | 0.292                          | 796.64             | 232.86             |
| A_68_P27234347 | chr10:70700994-70701038                           | NM_009360:-224    | Tfam       | PROMOTER               | 0.633                                                        | 0.502                          | 4368.79            | 2192.04            | 0.318                          | 3184.49            | 1011.73            |
| A_68_P26745887 | chr9:96096585-96096629                            | NM_001184706:-87  | Tfdp2      | PROMOTER               | 0.631                                                        | 3.177                          | 1415.17            | 4495.65            | 2.004                          | 1162.14            | 2328.60            |
| A_68_P30782600 | chr16:56717318-56717362                           | NM_019678:127     | Tfg        | INSIDE                 | 0.623                                                        | 2.713                          | 1052.83            | 2856.10            | 1.69                           | 839.37             | 1418.80            |
| A_68_P30653349 | chr16:32609415-32609459                           | NM_011638:455     | Tffc       | INSIDE                 | 0.461                                                        | 0.256                          | 2046.51            | 523.35             | 0.118                          | 1646.44            | 194.15             |
| A_68_P30653348 | chr16:32609325-32609369                           | NM_011638:365     | Tffc       | INSIDE                 | 0.476                                                        | 0.634                          | 1428.00            | 905.47             | 0.302                          | 1188.86            | 359.06             |
| A_68_P30653344 | chr16:32608841-32608885                           | NM_011638:-119    | Tffc       | PROMOTER               | 0.504                                                        | 1.359                          | 5826.51            | 7918.40            | 0.685                          | 4304.81            | 2949.15            |
| A_68_P29936814 | chr14:118531918-118531962                         | NM_029578:47      | Tgds       | INSIDE                 | 0.476                                                        | 3.377                          | 909.96             | 3073.38            | 1.606                          | 799.06             | 1283.42            |
| A_68_P24608765 | chr6:86145281-86145325                            | NM_031199:58      | Tgfa       | INSIDE                 | 0.216                                                        | 17.717                         | 231.97             | 4109.69            | 3.821                          | 237.92             | 909.05             |
| A_68_P25011349 | chr7:26474463-26474507                            | NM_011577:2464    | Tgfb1      | INSIDE                 | 0.207                                                        | 17.971                         | 1056.05            | 18977.85           | 3.715                          | 933.96             | 3470.06            |
| A_68_P25011329 | chr7:26472470-26472514                            | NM_011577:472     | Tgfb1      | INSIDE                 | 0.274                                                        | 8.253                          | 5584.03            | 46084.32           | 2.26                           | 4182.51            | 9452.83            |
| A_68_P25011324 | chr7:26471878-26471922                            | NM_011577:-120    | Tgfb1      | PROMOTER               | 0.516                                                        | 4.550                          | 2698.07            | 12277.28           | 2.349                          | 2201.23            | 5169.88            |
| A_68_P29062337 | chr13:56710941-56710985                           | NM_009369:-1      | Tgfb1      | PROMOTER               | 0.355                                                        | 9.599                          | 5803.96            | 55714.75           | 3.412                          | 4662.61            | 15906.64           |
| A_68_P29062336 | chr13:56710843-56710887                           | NM_009369:-99     | Tgfb1      | PROMOTER               | 0.587                                                        | 0.718                          | 5070.50            | 3642.52            | 0.422                          | 3639.79            | 1535.14            |
| A_68_P22894261 | chr4:47365847-47365891                            | NM_009370:-308    | Tgfb1      | PROMOTER               | 0.567                                                        | 10.769                         | 1144.36            | 12323.61           | 6.102                          | 945.49             | 5769.23            |
| A_68_P22894263 | chr4:47366193-47366237                            | NM_009370:38      | Tgfb1      | INSIDE                 | 0.555                                                        | 0.710                          | 2143.75            | 1521.46            | 0.394                          | 1938.66            | 763.60             |
| A_68_P22894259 | chr4:47365606-47365650                            | NM_009370:-548    | Tgfb1      | PROMOTER               | 0.136                                                        | 1.376                          | 3727.85            | 5128.32            | 0.187                          | 2428.47            | 453.85             |
| A_68_P20186937 | chr1:43149031-43149075                            | NM_001013025:6415 | Tgfb1p1    | INSIDE                 | 0.574                                                        | 0.714                          | 9908.23            | 7071.57            | 0.409                          | 6781.44            | 2775.75            |
| A_68_P20186939 | chr1:43149198-43149242                            | NM_001013025:6247 | Tgfb1p1    | INSIDE                 | 0.48                                                         | 2.966                          | 2358.80            | 6995.25            | 1.423                          | 1997.88            | 2842.03            |

| ProbeName      | Target position of probe on CpG island microarray | TargetID           | GeneSymbol | CpG island Description | Ratio of relative methylation (TiO <sub>2</sub> -NP/Vehicle) | Sham group                     |                    |                    | TiO <sub>2</sub> -H group      |                    |                    |
|----------------|---------------------------------------------------|--------------------|------------|------------------------|--------------------------------------------------------------|--------------------------------|--------------------|--------------------|--------------------------------|--------------------|--------------------|
|                |                                                   |                    |            |                        |                                                              | Relative methylation (Cy5/Cy3) | Cy3 signal (Input) | Cy5 signal (MeDIP) | Relative methylation (Cy5/Cy3) | Cy3 signal (Input) | Cy5 signal (MeDIP) |
| A_68_P21773626 | chr2:15666515-15666569                            | NM_173396:-176     | Tgif2      | PROMOTER               | 0.458                                                        | 8.673                          | 1767.34            | 15328.38           | 3.974                          | 1485.20            | 5902.60            |
| A_68_P21773631 | chr2:156666079-156666123                          | NM_173396:288      | Tgif2      | INSIDE                 | 0.323                                                        | 1.980                          | 6374.22            | 12623.59           | 0.639                          | 4634.40            | 2961.43            |
| A_68_P25731030 | chr8:27269296-27269340                            | NM_199042:678      | Thap1      | INSIDE                 | 0.588                                                        | 2.921                          | 924.59             | 2701.00            | 1.719                          | 815.77             | 1402.34            |
| A_68_P25731031 | chr8:27269366-27269410                            | NM_199042:748      | Thap1      | INSIDE                 | 0.654                                                        | 2.719                          | 887.41             | 2412.46            | 1.777                          | 672.72             | 1195.74            |
| A_68_P26136330 | chr8:108379864-108379908                          | NM_021513:884      | Thap11     | INSIDE                 | 0.483                                                        | 3.641                          | 506.86             | 1845.25            | 1.758                          | 580.50             | 1020.79            |
| A_68_P27469298 | chr10:114821572-114821616                         | NM_025780:-103     | Thap2      | DIVERGENT_PROMOTER     | 0.539                                                        | 3.000                          | 5320.67            | 15963.03           | 1.616                          | 4478.92            | 7237.94            |
| A_68_P20457301 | chr1:-95651221-95651265                           | NM_025920:173      | Thap4      | INSIDE                 | 0.542                                                        | 21.250                         | 1246.81            | 26494.83           | 11.519                         | 1057.88            | 12185.53           |
| A_68_P30574323 | chr16:17530866-17530910                           | NM_026909:257      | Thap7      | INSIDE                 | 0.615                                                        | 0.397                          | 1489.41            | 591.49             | 0.244                          | 1150.18            | 280.77             |
| A_68_P29225755 | chr13:93564632-93564676                           | NM_011582:119      | Thbs4      | INSIDE                 | 0.624                                                        | 0.709                          | 2007.16            | 1422.38            | 0.442                          | 1683.21            | 744.79             |
| A_68_P29225757 | chr13:93564876-93564920                           | NM_011582:-125     | Thbs4      | PROMOTER               | 0.309                                                        | 4.635                          | 2863.76            | 13273.80           | 1.432                          | 2452.25            | 3512.07            |
| A_68_P21054135 | chr2:21127530-21127574                            | NM_001001297:202   | Thns1      | INSIDE                 | 0.48                                                         | 0.300                          | 6492.61            | 1947.72            | 0.144                          | 4404.38            | 633.71             |
| A_68_P24534825 | chr6:71094013-71094057                            | NM_001033929:336   | Thns2      | INSIDE                 | 0.578                                                        | 0.225                          | 2124.48            | 477.30             | 0.13                           | 1557.07            | 202.28             |
| A_68_P31487558 | chr18:9957999-9958043                             | NM_153552:-157     | Thoc1      | PROMOTER               | 0.526                                                        | 0.426                          | 1843.66            | 784.65             | 0.224                          | 1254.37            | 280.62             |
| A_68_P29418922 | chr14:14794169-14794213                           | NM_025435:-451     | Thoc7      | PROMOTER               | 0.454                                                        | 4.942                          | 2190.83            | 10827.34           | 2.243                          | 1661.00            | 3725.13            |
| A_68_P29418923 | chr14:14794239-14794283                           | NM_025435:-521     | Thoc7      | PROMOTER               | 0.482                                                        | 0.207                          | 2108.36            | 437.07             | 0.1                            | 1667.73            | 166.61             |
| A_68_P29418915 | chr14:14793361-14793405                           | NM_025435:357      | Thoc7      | INSIDE                 | 0.531                                                        | 0.545                          | 1099.33            | 598.71             | 0.289                          | 904.73             | 261.56             |
| A_68_P27287202 | chr10:80532912-80532956                           | NM_022653:107      | Thop1      | INSIDE                 | 0.415                                                        | 0.453                          | 1082.07            | 490.69             | 0.188                          | 906.68             | 170.83             |
| A_68_P27287274 | chr10:80542595-80542639                           | NM_022653:9789     | Thop1      | INSIDE                 | 0.435                                                        | 8.528                          | 1511.84            | 12892.21           | 3.707                          | 1131.97            | 4196.19            |
| A_68_P27287200 | chr10:80532719-80532763                           | NM_022653:-87      | Thop1      | DIVERGENT_PROMOTER     | 0.526                                                        | 0.478                          | 1115.50            | 533.50             | 0.251                          | 822.43             | 206.78             |
| A_68_P25510954 | chr7:135604766-135604810                          | NM_009383:239      | Tial1      | INSIDE                 | 0.366                                                        | 0.606                          | 941.02             | 570.63             | 0.222                          | 769.46             | 170.76             |
| A_68_P24485184 | chr6:59158961-59159005                            | NM_001081145:119   | Tigd2      | INSIDE                 | 0.365                                                        | 0.549                          | 998.69             | 548.76             | 0.201                          | 870.37             | 174.58             |
| A_68_P30344892 | chr15:75741160-75741204                           | NM_178646:1018     | Tigd5      | INSIDE                 | 0.441                                                        | 0.402                          | 3776.82            | 1517.89            | 0.177                          | 2619.10            | 464.45             |
| A_68_P30344883 | chr15:75740087-75740131                           | NM_178646:-56      | Tigd5      | DIVERGENT_PROMOTER     | 0.443                                                        | 8.989                          | 2220.24            | 19956.75           | 3.983                          | 1822.60            | 7260.19            |
| A_68_P27540232 | chr10:127669379-127669423                         | NM_011589:-5721    | Timeless   | PROMOTER               | 0.574                                                        | 4.758                          | 451.46             | 2147.94            | 2.732                          | 453.97             | 1240.19            |
| A_68_P27286217 | chr10:80363400-80363444                           | NM_013895:292      | Timm13     | INSIDE                 | 0.601                                                        | 0.577                          | 2581.43            | 1489.59            | 0.347                          | 1978.14            | 686.41             |
| A_68_P20638619 | chr1:137210199-137210243                          | NM_011590:94       | Timm17a    | INSIDE                 | 0.368                                                        | 0.719                          | 1778.51            | 1279.48            | 0.265                          | 1296.06            | 343.09             |
| A_68_P32672454 | chrX:131076324-131076368                          | NM_013898:-178     | Timm8a1    | PROMOTER               | 0.652                                                        | 5.603                          | 653.84             | 3663.71            | 3.656                          | 777.20             | 2841.19            |
| A_68_P27313251 | chr10:85763083-85763128                           | NM_011595:-51      | Timp3      | PROMOTER               | 0.448                                                        | 0.498                          | 1575.43            | 784.17             | 0.223                          | 1143.75            | 255.07             |
| A_68_P26421202 | chr9:35007602-35007646                            | NM_001177846:-74   | Tirap      | PROMOTER               | 0.544                                                        | 0.527                          | 1317.83            | 694.87             | 0.287                          | 1076.40            | 308.80             |
| A_68_P25182469 | chr7:72516013-72516058                            | NM_001163574:95    | Tjp1       | INSIDE                 | 0.469                                                        | 3.299                          | 1368.64            | 4514.79            | 1.548                          | 1268.22            | 1962.92            |
| A_68_P32021816 | chr19:24205473-24205517                           | NM_001198985:43136 | Tjp2       | INSIDE                 | 0.524                                                        | 4.826                          | 1351.96            | 6524.45            | 2.53                           | 894.01             | 2262.13            |
| A_68_P32021818 | chr19:24205720-24205764                           | NM_001198985:42888 | Tjp2       | INSIDE                 | 0.623                                                        | 5.235                          | 2439.68            | 12771.47           | 3.263                          | 2049.05            | 6686.72            |
| A_68_P32021817 | chr19:24205542-24205588                           | NM_001198985:43066 | Tjp2       | INSIDE                 | 0.661                                                        | 3.726                          | 1186.01            | 4419.04            | 2.462                          | 677.04             | 1667.03            |
| A_68_P32022083 | chr19:24248437-24248481                           | NM_001198985:172   | Tjp2       | INSIDE                 | 0.6                                                          | 2.756                          | 2320.67            | 6396.59            | 1.655                          | 1896.03            | 3137.02            |
| A_68_P27288599 | chr10:80748500-80748544                           | NM_013769:5490     | Tjp3       | INSIDE                 | 0.519                                                        | 3.807                          | 966.46             | 3679.46            | 1.976                          | 850.41             | 1680.67            |
| A_68_P23012913 | chr4:71860924-71860968                            | NM_011599:1007     | Tle1       | INSIDE                 | 0.304                                                        | 6.951                          | 2590.65            | 18007.08           | 2.113                          | 1987.73            | 4199.84            |
| A_68_P27290609 | chr10:81038162-81038206                           | NM_019725:-92      | Tle2       | PROMOTER               | 0.434                                                        | 0.644                          | 1396.48            | 899.67             | 0.28                           | 1016.97            | 284.33             |
| A_68_P27290695 | chr10:81050342-81050386                           | NM_019725:12088    | Tle2       | INSIDE                 | 0.362                                                        | 1.716                          | 1903.27            | 3266.39            | 0.622                          | 1348.19            | 838.39             |
| A_68_P27290790 | chr10:81063642-81063689                           | NM_053254:-20      | Tle6       | DIVERGENT_PROMOTER     | 0.234                                                        | 18.140                         | 7066.68            | 128192.70          | 4.24                           | 6006.87            | 25471.42           |
| A_68_P32136800 | chr19:45228638-45228682                           | NM_021901:3456     | Tlx1       | INSIDE                 | 0.472                                                        | 6.584                          | 918.77             | 6049.38            | 3.108                          | 802.80             | 2494.97            |
| A_68_P32136769 | chr19:45224972-45225016                           | NM_021901:-210     | Tlx1       | PROMOTER               | 0.576                                                        | 0.667                          | 1789.84            | 1194.09            | 0.384                          | 1140.04            | 438.16             |
| A_68_P24591244 | chr6:83019585-83019631                            | NM_009392:611      | Tlx2       | INSIDE                 | 0.387                                                        | 0.329                          | 2238.17            | 737.06             | 0.127                          | 1368.53            | 174.27             |
| A_68_P24591254 | chr6:83020596-83020640                            | NM_009392:-399     | Tlx2       | DIVERGENT_PROMOTER     | 0.606                                                        | 0.429                          | 3675.15            | 1578.13            | 0.26                           | 2826.61            | 735.39             |
| A_68_P24591247 | chr6:83019894-83019938                            | NM_009392:303      | Tlx2       | INSIDE                 | 0.6                                                          | 0.697                          | 1081.67            | 753.75             | 0.418                          | 874.68             | 365.92             |
| A_68_P27693341 | chr11:33101001-33101045                           | NM_019916:2566     | Tlx3       | INSIDE                 | 0.107                                                        | 96.416                         | 8051.74            | 776319.60          | 10.278                         | 7890.96            | 81101.33           |
| A_68_P27693355 | chr11:33102836-33102880                           | NM_019916:730      | Tlx3       | INSIDE                 | 0.142                                                        | 18.170                         | 1307.87            | 23764.26           | 2.589                          | 1176.07            | 3044.85            |

| ProbeName      | Target position of probe on CpG island microarray | TargetID          | GeneSymbol | CpG island Description | Ratio of relative methylation (TiO <sub>2</sub> -NP/Vehicle) | Sham group                     |                    |                    | TiO <sub>2</sub> -H group      |                    |                    |
|----------------|---------------------------------------------------|-------------------|------------|------------------------|--------------------------------------------------------------|--------------------------------|--------------------|--------------------|--------------------------------|--------------------|--------------------|
|                |                                                   |                   |            |                        |                                                              | Relative methylation (Cy5/Cy3) | Cy3 signal (Input) | Cy5 signal (MeDIP) | Relative methylation (Cy5/Cy3) | Cy3 signal (Input) | Cy5 signal (MeDIP) |
| A_68_P27693346 | chr11:33101716-33101763                           | NM_019916:1849    | Tlx3       | INSIDE                 | 0.476                                                        | 12.349                         | 560.41             | 6920.58            | 5.875                          | 413.97             | 2431.97            |
| A_68_P27693349 | chr11:33102051-33102095                           | NM_019916:1516    | Tlx3       | INSIDE                 | 0.476                                                        | 0.517                          | 1789.35            | 924.59             | 0.246                          | 1444.79            | 355.69             |
| A_68_P27693347 | chr11:33101808-33101852                           | NM_019916:1758    | Tlx3       | INSIDE                 | 0.6                                                          | 6.719                          | 678.13             | 4556.16            | 4.033                          | 555.04             | 2238.52            |
| A_68_P27693350 | chr11:33102180-33102224                           | NM_019916:1386    | Tlx3       | INSIDE                 | 0.359                                                        | 1.649                          | 5402.44            | 8908.16            | 0.593                          | 3434.10            | 2035.45            |
| A_68_P25724849 | chr8:26128143-26128187                            | NM_027194:482     | Tm2d2      | INSIDE                 | 0.245                                                        | 0.481                          | 1840.08            | 884.48             | 0.118                          | 1453.21            | 171.01             |
| A_68_P25724844 | chr8:26127584-26127628                            | NM_027194:-76     | Tm2d2      | DIVERGENT_PROMOTER     | 0.383                                                        | 6.709                          | 1458.42            | 9784.54            | 2.573                          | 1086.41            | 2795.16            |
| A_68_P25184109 | chr7:72838329-72838373                            | NM_026795:48      | Tm2d3      | INSIDE                 | 0.656                                                        | 0.393                          | 2252.22            | 884.61             | 0.258                          | 1644.02            | 423.77             |
| A_68_P24929724 | chr6:146582793-146582837                          | NM_026281:300     | Tm7sf3     | INSIDE                 | 0.555                                                        | 4.395                          | 1122.76            | 4934.32            | 2.439                          | 908.24             | 2215.27            |
| A_68_P29619051 | chr14:56262543-56262587                           | NM_028780:79      | Tm9sf1     | INSIDE                 | 0.543                                                        | 4.031                          | 405.44             | 1634.35            | 2.188                          | 313.76             | 686.42             |
| A_68_P29959675 | chr14:122506713-122506757                         | NM_080556:431     | Tm9sf2     | INSIDE                 | 0.497                                                        | 2.701                          | 5108.74            | 13801.07           | 1.342                          | 4342.02            | 5828.33            |
| A_68_P32114042 | chr19:41337768-41337812                           | NM_133352:704     | Tm9sf3     | INSIDE                 | 0.479                                                        | 0.275                          | 1746.78            | 479.90             | 0.132                          | 1293.87            | 170.34             |
| A_68_P27495880 | chr10:119645922-119645966                         | NM_026617:63      | Tmbim4     | INSIDE                 | 0.589                                                        | 0.262                          | 3551.55            | 930.18             | 0.154                          | 2661.92            | 410.32             |
| A_68_P30479870 | chr15:99223391-99223435                           | NM_001171035:-237 | Tmbim6     | PROMOTER               | 0.459                                                        | 3.027                          | 2638.99            | 7988.00            | 1.389                          | 1822.35            | 2530.96            |
| A_68_P28167167 | chr11:117641287-117641331                         | NM_181321:627     | Tmc6       | INSIDE                 | 0.39                                                         | 1.638                          | 1868.72            | 3060.13            | 0.639                          | 1440.74            | 920.85             |
| A_68_P25459064 | chr7:125728226-125728270                          | NM_172476:-48     | Tmc7       | PROMOTER               | 0.315                                                        | 9.534                          | 1980.82            | 18885.00           | 3.001                          | 1667.38            | 5003.63            |
| A_68_P28167195 | chr11:117644840-117644884                         | NM_001195088:891  | Tmc8       | INSIDE                 | 0.548                                                        | 0.568                          | 1808.48            | 1027.56            | 0.312                          | 1281.42            | 399.22             |
| A_68_P28167194 | chr11:117644703-117644747                         | NM_001195088:753  | Tmc8       | INSIDE                 | 0.395                                                        | 0.599                          | 986.25             | 590.64             | 0.237                          | 735.83             | 174.18             |
| A_68_P20620973 | chr1:134257439-134257483                          | NM_178874:30398   | Tmcc2      | INSIDE                 | 0.177                                                        | 9.517                          | 2388.69            | 22733.30           | 1.684                          | 1665.87            | 2804.72            |
| A_68_P20620970 | chr1:134257180-134257224                          | NM_178874:30656   | Tmcc2      | INSIDE                 | 0.266                                                        | 6.028                          | 2560.53            | 15436.10           | 1.606                          | 1950.91            | 3132.71            |
| A_68_P20620974 | chr1:134257507-134257551                          | NM_178874:30330   | Tmcc2      | INSIDE                 | 0.165                                                        | 10.506                         | 1549.51            | 16279.63           | 1.735                          | 1020.05            | 1769.83            |
| A_68_P27359835 | chr10:93978114-93978158                           | NM_172051:535     | Tmcc3      | INSIDE                 | 0.311                                                        | 5.488                          | 788.88             | 4329.78            | 1.704                          | 752.18             | 1281.98            |
| A_68_P27359833 | chr10:93977922-93977966                           | NM_172051:343     | Tmcc3      | INSIDE                 | 0.584                                                        | 2.981                          | 849.55             | 2532.13            | 1.741                          | 677.41             | 1179.37            |
| A_68_P20804423 | chr1:169238910-169238954                          | NM_001039483:132  | Tmco1      | INSIDE                 | 0.282                                                        | 1.871                          | 1099.58            | 2057.40            | 0.528                          | 994.03             | 524.59             |
| A_68_P23348948 | chr4:138528822-138528867                          | NM_029857:25      | Tmco4      | INSIDE                 | 0.473                                                        | 0.391                          | 1135.29            | 443.45             | 0.185                          | 945.15             | 174.78             |
| A_68_P26140913 | chr8:109207201-109207245                          | NM_173037:255     | Tmco7      | INSIDE                 | 0.334                                                        | 0.559                          | 1524.39            | 852.03             | 0.186                          | 1261.35            | 235.15             |
| A_68_P23974100 | chr5:109203943-109203987                          | NM_026109:20418   | Tmed11     | DOWNSTREAM             | 0.405                                                        | 5.774                          | 1712.08            | 9886.38            | 2.338                          | 1252.47            | 2927.85            |
| A_68_P23974103 | chr5:109204294-109204338                          | NM_026109:20066   | Tmed11     | DOWNSTREAM             | 0.664                                                        | 5.458                          | 353.45             | 1929.18            | 3.627                          | 308.01             | 1117.04            |
| A_68_P26713768 | chr9:89599588-89599632                            | NM_025360:271     | Tmed3      | INSIDE                 | 0.583                                                        | 3.562                          | 591.75             | 2107.87            | 2.077                          | 546.24             | 1134.78            |
| A_68_P28614745 | chr12:88540669-88540713                           | NM_001033475:489  | Tmed8      | INSIDE                 | 0.544                                                        | 8.065                          | 2948.87            | 23783.33           | 4.387                          | 2858.07            | 12538.43           |
| A_68_P28614749 | chr12:88541116-88541160                           | NM_001033475:41   | Tmed8      | INSIDE                 | 0.551                                                        | 3.888                          | 664.02             | 2581.48            | 2.142                          | 571.75             | 1224.88            |
| A_68_P22900943 | chr4:48598769-48598813                            | NM_021436:726     | Tmeff1     | INSIDE                 | 0.267                                                        | 0.483                          | 3027.22            | 1461.41            | 0.129                          | 1987.89            | 256.00             |
| A_68_P22900940 | chr4:48598477-48598521                            | NM_021436:434     | Tmeff1     | INSIDE                 | 0.548                                                        | 2.957                          | 1439.88            | 4257.16            | 1.621                          | 1266.55            | 2053.43            |
| A_68_P20218128 | chr1:50984412-50984456                            | NM_019790:68      | Tmeff2     | INSIDE                 | 0.543                                                        | 0.425                          | 4058.92            | 1725.90            | 0.231                          | 2998.17            | 692.76             |
| A_68_P20218125 | chr1:50984012-50984056                            | NM_019790:-332    | Tmeff2     | PROMOTER               | 0.598                                                        | 0.472                          | 2014.25            | 951.46             | 0.283                          | 1550.99            | 438.43             |
| A_68_P28151868 | chr11:115048748-115048792                         | NM_001033393:-30  | Tmem104    | DIVERGENT_PROMOTER     | 0.125                                                        | 18.772                         | 3719.65            | 69827.15           | 2.34                           | 3137.54            | 7340.92            |
| A_68_P26787849 | chr9:103664052-103664096                          | NM_178638:93      | Tmem108    | INSIDE                 | 0.518                                                        | 1.341                          | 4084.50            | 5477.06            | 0.695                          | 3466.31            | 2409.31            |
| A_68_P27845266 | chr11:60692244-60692288                           | NM_001168507:274  | Tmem11     | INSIDE                 | 0.203                                                        | 7.656                          | 1920.40            | 14702.31           | 1.551                          | 1425.01            | 2209.97            |
| A_68_P29508103 | chr14:31638633-31638679                           | NM_028839:-123    | Tmem110    | PROMOTER               | 0.358                                                        | 0.578                          | 959.54             | 554.71             | 0.207                          | 822.54             | 170.30             |
| A_68_P30453398 | chr15:94459261-94459305                           | NM_178789:-333    | Tmem117    | PROMOTER               | 0.388                                                        | 9.803                          | 7988.03            | 78309.62           | 3.799                          | 6806.18            | 25859.53           |
| A_68_P24117669 | chr5:136219992-136220036                          | NM_172541:28      | Tmem120a   | INSIDE                 | 0.658                                                        | 3.980                          | 879.92             | 3501.71            | 2.619                          | 812.80             | 2129.06            |
| A_68_P28755242 | chr12:114426423-114426467                         | NM_153776:2331    | Tmem121    | INSIDE                 | 0.145                                                        | 3.118                          | 1371.17            | 4275.94            | 0.453                          | 880.28             | 398.47             |
| A_68_P26289277 | chr9:7763854-7763898                              | NM_133739:-200    | Tmem123    | PROMOTER               | 0.505                                                        | 4.325                          | 10329.97           | 44680.41           | 2.183                          | 7527.24            | 16430.26           |
| A_68_P26289278 | chr9:7763954-7763998                              | NM_133739:-100    | Tmem123    | PROMOTER               | 0.588                                                        | 0.744                          | 3257.35            | 2423.47            | 0.437                          | 2489.70            | 1088.37            |
| A_68_P21612305 | chr2:127073731-127073775                          | NM_175145:42      | Tmem127    | INSIDE                 | 0.52                                                         | 0.560                          | 1874.65            | 1049.86            | 0.291                          | 1521.94            | 443.42             |
| A_68_P21612309 | chr2:127074111-127074155                          | NM_175145:422     | Tmem127    | INSIDE                 | 0.635                                                        | 0.209                          | 2784.04            | 581.25             | 0.133                          | 2224.28            | 294.90             |
| A_68_P24162428 | chr5:145522451-145522495                          | NM_177735:-25     | Tmem130    | DIVERGENT_PROMOTER     | 0.6                                                          | 0.346                          | 2753.08            | 951.46             | 0.207                          | 2133.65            | 442.15             |

| ProbeName      | Target position of probe on CpG island microarray | TargetID           | GeneSymbol | CpG island Description | Ratio of relative methylation (TiO <sub>2</sub> -NP/Vehicle) | Sham group                     |                    |                    | TiO <sub>2</sub> -H group      |                    |                    |
|----------------|---------------------------------------------------|--------------------|------------|------------------------|--------------------------------------------------------------|--------------------------------|--------------------|--------------------|--------------------------------|--------------------|--------------------|
|                |                                                   |                    |            |                        |                                                              | Relative methylation (Cy5/Cy3) | Cy3 signal (Input) | Cy5 signal (MeDIP) | Relative methylation (Cy5/Cy3) | Cy3 signal (Input) | Cy5 signal (MeDIP) |
| A_68_P20151305 | chr1:36996651-36996695                            | NM_018872:-300     | Tmem131    | PROMOTER               | 0.378                                                        | 6.749                          | 1322.50            | 8925.82            | 2.549                          | 1149.07            | 2929.05            |
| A_68_P31953349 | chr19:10944024-10944068                           | NM_133804:223      | Tmem132a   | INSIDE                 | 0.556                                                        | 0.579                          | 1305.52            | 755.96             | 0.322                          | 959.59             | 308.70             |
| A_68_P24083090 | chr5:128938897-128938941                          | NM_172885:19       | Tmem132d   | INSIDE                 | 0.29                                                         | 7.447                          | 1193.01            | 8884.56            | 2.162                          | 1005.68            | 2174.25            |
| A_68_P27966237 | chr11:82248208-82248252                           | NM_023438:45829    | Tmem132e   | INSIDE                 | 0.305                                                        | 7.573                          | 1570.32            | 11891.34           | 2.313                          | 1312.11            | 3035.12            |
| A_68_P27965917 | chr11:82200919-82200963                           | NM_023438:-1461    | Tmem132e   | PROMOTER               | 0.331                                                        | 27.849                         | 2136.92            | 59510.48           | 9.207                          | 1818.74            | 16744.97           |
| A_68_P27965931 | chr11:82202507-82202551                           | NM_023438:127      | Tmem132e   | INSIDE                 | 0.374                                                        | 13.834                         | 5415.05            | 74912.48           | 5.172                          | 4748.40            | 24560.59           |
| A_68_P25009653 | chr7:26100013-26100057                            | NM_183311:8908     | Tmem145    | INSIDE                 | 0.141                                                        | 2.404                          | 14992.69           | 36037.19           | 0.34                           | 11158.22           | 3793.58            |
| A_68_P25009654 | chr7:26100103-26100147                            | NM_183311:8998     | Tmem145    | INSIDE                 | 0.268                                                        | 1.674                          | 7216.44            | 12081.47           | 0.449                          | 5423.28            | 2433.05            |
| A_68_P25009660 | chr7:26100723-26100767                            | NM_183311:9618     | Tmem145    | INSIDE                 | 0.606                                                        | 0.388                          | 2820.08            | 1095.09            | 0.235                          | 2181.15            | 513.45             |
| A_68_P25009594 | chr7:26091283-26091327                            | NM_183311:178      | Tmem145    | INSIDE                 | 0.592                                                        | 0.616                          | 3009.63            | 1853.99            | 0.365                          | 2225.78            | 811.57             |
| A_68_P25009661 | chr7:26100795-26100839                            | NM_183311:9690     | Tmem145    | INSIDE                 | 0.266                                                        | 1.476                          | 4834.69            | 7136.14            | 0.392                          | 3539.88            | 1388.40            |
| A_68_P28975559 | chr13:41111578-41111622                           | NM_025387:-18      | Tmem14c    | PROMOTER               | 0.241                                                        | 0.705                          | 6037.14            | 4256.58            | 0.17                           | 4574.58            | 778.62             |
| A_68_P31201735 | chr17:45686486-45686530                           | NM_001013749:118   | Tmem151b   | INSIDE                 | 0.425                                                        | 10.595                         | 4074.84            | 43171.88           | 4.499                          | 3265.38            | 14692.44           |
| A_68_P31201732 | chr17:45686195-45686239                           | NM_001013749:410   | Tmem151b   | INSIDE                 | 0.332                                                        | 1.766                          | 1870.40            | 3302.28            | 0.586                          | 1471.70            | 862.99             |
| A_68_P31201733 | chr17:45686337-45686381                           | NM_001013749:268   | Tmem151b   | INSIDE                 | 0.624                                                        | 2.241                          | 2075.39            | 4650.67            | 1.399                          | 1663.84            | 2327.00            |
| A_68_P26894026 | chr9:123168701-123168745                          | NM_001002267:1185  | Tmem158    | INSIDE                 | 0.457                                                        | 7.087                          | 2042.78            | 14477.81           | 3.241                          | 1655.11            | 5364.69            |
| A_68_P26894035 | chr9:123169998-123170042                          | NM_001002267:-113  | Tmem158    | PROMOTER               | 0.507                                                        | 10.440                         | 1637.03            | 17089.91           | 5.292                          | 1360.18            | 7197.90            |
| A_68_P26894025 | chr9:123168633-123168677                          | NM_001002267:1253  | Tmem158    | INSIDE                 | 0.478                                                        | 0.698                          | 1210.71            | 844.88             | 0.333                          | 931.20             | 310.35             |
| A_68_P25467117 | chr7:127246125-127246169                          | NM_145586:207      | Tmem159    | INSIDE                 | 0.4                                                          | 0.168                          | 3469.94            | 584.10             | 0.067                          | 2505.18            | 168.88             |
| A_68_P25467116 | chr7:127246039-127246083                          | NM_145586:121      | Tmem159    | INSIDE                 | 0.651                                                        | 0.704                          | 2527.48            | 1780.36            | 0.458                          | 1796.40            | 823.40             |
| A_68_P29189772 | chr13:84361804-84361848                           | NM_175187:-74      | Tmem161b   | PROMOTER               | 0.604                                                        | 0.338                          | 2524.23            | 854.19             | 0.204                          | 1890.80            | 386.39             |
| A_68_P32709177 | chrX:139116370-139116414                          | NM_001199360:124   | Tmem164    | INSIDE                 | 0.128                                                        | 13.855                         | 2170.98            | 30078.15           | 1.779                          | 3007.14            | 5348.28            |
| A_68_P32709174 | chrX:139116023-139116067                          | NM_001199360:-224  | Tmem164    | PROMOTER               | 0.254                                                        | 15.826                         | 1855.57            | 29367.03           | 4.022                          | 2254.65            | 9068.42            |
| A_68_P23814584 | chr5:76613501-76613545                            | NM_011626:618      | Tmem165    | INSIDE                 | 0.269                                                        | 9.295                          | 879.14             | 8171.63            | 2.498                          | 725.42             | 1812.27            |
| A_68_P29211817 | chr13:90229380-90229424                           | NM_025335:131      | Tmem167    | INSIDE                 | 0.521                                                        | 0.551                          | 1916.41            | 1055.95            | 0.287                          | 1377.86            | 395.41             |
| A_68_P22413373 | chr3:108365105-108365149                          | NM_026198:258      | Tmem167b   | INSIDE                 | 0.295                                                        | 18.995                         | 8898.02            | 169017.80          | 5.612                          | 8057.95            | 45224.74           |
| A_68_P22413375 | chr3:108365261-108365305                          | NM_026198:102      | Tmem167b   | INSIDE                 | 0.574                                                        | 0.708                          | 3611.83            | 2555.42            | 0.406                          | 2566.84            | 1043.33            |
| A_68_P24248064 | chr6:13557588-13557632                            | NM_028990:453      | Tmem168    | INSIDE                 | 0.46                                                         | 0.516                          | 2080.19            | 1074.30            | 0.237                          | 1668.85            | 396.20             |
| A_68_P27641464 | chr11:22412537-22412581                           | NM_153596:273      | Tmem17     | INSIDE                 | 0.634                                                        | 3.622                          | 780.00             | 2824.76            | 2.298                          | 643.08             | 1477.64            |
| A_68_P27641465 | chr11:22412657-22412701                           | NM_153596:393      | Tmem17     | INSIDE                 | 0.47                                                         | 0.648                          | 1021.32            | 662.15             | 0.304                          | 840.04             | 255.77             |
| A_68_P23973160 | chr5:109058811-109058855                          | NM_001163531:4     | Tmem175    | INSIDE                 | 0.627                                                        | 4.226                          | 513.33             | 2169.35            | 2.648                          | 405.30             | 1073.24            |
| A_68_P31385964 | chr17:81344186-81344230                           | NM_026516:237      | Tmem178    | INSIDE                 | 0.563                                                        | 2.640                          | 2512.48            | 6633.17            | 1.486                          | 2258.91            | 3355.95            |
| A_68_P32143397 | chr19:46423267-46423311                           | NM_029186:-8081    | Tmem180    | PROMOTER               | 0.362                                                        | 0.391                          | 1512.94            | 591.97             | 0.142                          | 1232.75            | 174.71             |
| A_68_P32143438 | chr19:46431466-46431510                           | NM_029186:119      | Tmem180    | INSIDE                 | 0.661                                                        | 2.639                          | 973.95             | 2570.38            | 1.745                          | 734.62             | 1282.27            |
| A_68_P20632910 | chr1:136241239-136241283                          | NM_001042485:17316 | Tmem183a   | DOWNSTREAM             | 0.658                                                        | 2.305                          | 2382.19            | 5492.01            | 1.517                          | 1919.40            | 2912.31            |
| A_68_P30366260 | chr15:79233510-79233554                           | NM_172608:201      | Tmem184b   | INSIDE                 | 0.545                                                        | 3.928                          | 1419.11            | 5573.95            | 2.14                           | 1259.10            | 2694.42            |
| A_68_P30366258 | chr15:79233359-79233403                           | NM_172608:353      | Tmem184b   | INSIDE                 | 0.397                                                        | 3.706                          | 2220.01            | 8227.52            | 1.472                          | 1732.71            | 2550.37            |
| A_68_P20557524 | chr1:121422451-121422495                          | NM_146103:-271     | Tmem185b   | PROMOTER               | 0.494                                                        | 0.741                          | 2448.54            | 1813.17            | 0.366                          | 1880.43            | 687.69             |
| A_68_P30572936 | chr16:17276365-17276409                           | NM_177473:-6       | Tmem191c   | PROMOTER               | 0.227                                                        | 44.372                         | 1020.19            | 45267.85           | 10.068                         | 958.07             | 9645.53            |
| A_68_P30572953 | chr16:17278195-17278239                           | NM_177473:1824     | Tmem191c   | INSIDE                 | 0.428                                                        | 0.412                          | 1164.71            | 479.94             | 0.176                          | 972.05             | 171.41             |
| A_68_P30572951 | chr16:17278027-17278071                           | NM_177473:1656     | Tmem191c   | INSIDE                 | 0.623                                                        | 3.377                          | 990.52             | 3345.19            | 2.102                          | 806.69             | 1696.04            |
| A_68_P30572940 | chr16:17276845-17276889                           | NM_177473:474      | Tmem191c   | INSIDE                 | 0.626                                                        | 2.707                          | 2331.16            | 6309.91            | 1.694                          | 1990.76            | 3371.40            |
| A_68_P25926491 | chr8:67471091-67471135                            | NM_001163747:29    | Tmem192    | INSIDE                 | 0.302                                                        | 8.354                          | 3239.39            | 27061.78           | 2.519                          | 2758.96            | 6950.86            |
| A_68_P27537442 | chr10:127114141-127114185                         | NM_173732:42       | Tmem194    | INSIDE                 | 0.664                                                        | 0.212                          | 5612.37            | 1189.25            | 0.141                          | 3773.02            | 530.48             |
| A_68_P20354344 | chr1:75476279-75476323                            | NM_177056:194      | Tmem198    | INSIDE                 | 0.407                                                        | 0.239                          | 2579.82            | 616.40             | 0.097                          | 1830.31            | 178.15             |
| A_68_P32008156 | chr19:21853273-21853317                           | NM_001033759:463   | Tmem2      | INSIDE                 | 0.253                                                        | 25.214                         | 3784.82            | 95432.40           | 6.368                          | 3811.50            | 24272.01           |

| ProbeName      | Target position of probe on CpG island microarray | TargetID          | GeneSymbol | CpG island Description | Ratio of relative methylation (TiO <sub>2</sub> -NP/Vehicle) | Sham group                     |                    |                    | TiO <sub>2</sub> -H group      |                    |                    |
|----------------|---------------------------------------------------|-------------------|------------|------------------------|--------------------------------------------------------------|--------------------------------|--------------------|--------------------|--------------------------------|--------------------|--------------------|
|                |                                                   |                   |            |                        |                                                              | Relative methylation (Cy5/Cy3) | Cy3 signal (Input) | Cy5 signal (MeDIP) | Relative methylation (Cy5/Cy3) | Cy3 signal (Input) | Cy5 signal (MeDIP) |
| A_68_P32008153 | chr19:21852916-21852960                           | NM_001033759:107  | Tmem2      | INSIDE                 | 0.374                                                        | 7.182                          | 1322.07            | 9495.04            | 2.689                          | 1278.46            | 3438.38            |
| A_68_P27017611 | chr10:25798724-25798768                           | NM_029881:112     | Tmem200a   | INSIDE                 | 0.478                                                        | 5.988                          | 270.98             | 1622.63            | 2.863                          | 246.37             | 705.46             |
| A_68_P23309116 | chr4:131477634-131477678                          | NM_001201367:-29  | Tmem200b   | PROMOTER               | 0.294                                                        | 8.700                          | 690.80             | 6009.97            | 2.561                          | 649.09             | 1662.45            |
| A_68_P31320370 | chr17:69186260-69186304                           | NM_001206661:-193 | Tmem200c   | PROMOTER               | 0.238                                                        | 0.556                          | 1719.09            | 956.11             | 0.133                          | 1301.66            | 172.64             |
| A_68_P31320413 | chr17:69190632-69190676                           | NM_001206661:4179 | Tmem200c   | INSIDE                 | 0.534                                                        | 5.009                          | 1378.07            | 6903.44            | 2.675                          | 1278.70            | 3420.88            |
| A_68_P31320372 | chr17:69186496-69186540                           | NM_001206661:43   | Tmem200c   | INSIDE                 | 0.626                                                        | 4.099                          | 919.72             | 3769.58            | 2.567                          | 865.10             | 2221.13            |
| A_68_P31320371 | chr17:69186413-69186457                           | NM_001206661:-41  | Tmem200c   | PROMOTER               | 0.397                                                        | 0.641                          | 1918.27            | 1229.03            | 0.255                          | 1484.38            | 377.88             |
| A_68_P31320416 | chr17:69191045-69191089                           | NM_001206661:4591 | Tmem200c   | INSIDE                 | 0.511                                                        | 3.651                          | 673.59             | 2458.96            | 1.865                          | 688.80             | 1284.76            |
| A_68_P23402215 | chr4:149111795-149111839                          | NM_001025106:327  | Tmem201    | INSIDE                 | 0.445                                                        | 16.572                         | 1441.67            | 23890.87           | 7.38                           | 1270.59            | 9377.05            |
| A_68_P20937464 | chr1:193150232-193150276                          | NM_025864:411     | Tmem206    | INSIDE                 | 0.288                                                        | 1.468                          | 1792.34            | 2630.91            | 0.423                          | 1316.40            | 556.96             |
| A_68_P26133052 | chr8:107850532-107850576                          | NM_025486:291     | Tmem208    | INSIDE                 | 0.267                                                        | 8.549                          | 7159.82            | 61209.05           | 2.284                          | 6331.58            | 14458.71           |
| A_68_P23575088 | chr5:31172158-31172203                            | NM_144525:161     | Tmem214    | INSIDE                 | 0.627                                                        | 0.259                          | 1756.72            | 454.42             | 0.162                          | 1055.03            | 171.19             |
| A_68_P26770338 | chr9:100471400-100471444                          | NM_001101483:82   | Tmem22     | INSIDE                 | 0.646                                                        | 2.889                          | 867.28             | 2505.38            | 1.866                          | 777.91             | 1451.59            |
| A_68_P25957474 | chr8:74082197-74082241                            | NM_001100462:552  | Tmem221    | INSIDE                 | 0.489                                                        | 0.522                          | 1504.94            | 786.26             | 0.255                          | 1126.48            | 287.69             |
| A_68_P25957473 | chr8:74082049-74082093                            | NM_001100462:700  | Tmem221    | INSIDE                 | 0.584                                                        | 0.615                          | 821.63             | 505.67             | 0.359                          | 600.29             | 215.65             |
| A_68_P23316767 | chr4:132833610-132833654                          | NM_025667:73      | Tmem222    | INSIDE                 | 0.496                                                        | 6.799                          | 1012.23            | 6881.83            | 3.372                          | 883.33             | 2978.74            |
| A_68_P23404140 | chr6:24905716-24905760                            | NM_177013:387     | Tmem229a   | INSIDE                 | 0.294                                                        | 7.698                          | 1461.17            | 11247.84           | 2.261                          | 1491.93            | 3373.25            |
| A_68_P28567140 | chr12:80108151-80108195                           | NM_178745:92      | Tmem229b   | INSIDE                 | 0.263                                                        | 25.377                         | 8916.01            | 226262.20          | 6.669                          | 7548.11            | 50341.03           |
| A_68_P23766883 | chr5:67652121-67652165                            | NM_028975:252     | Tmem33     | INSIDE                 | 0.618                                                        | 0.519                          | 1049.40            | 544.75             | 0.321                          | 897.43             | 287.77             |
| A_68_P25962147 | chr8:75095836-75095880                            | NM_144534:-143    | Tmem38a    | DIVERGENT_PROMOTER     | 0.3                                                          | 7.842                          | 1345.95            | 10555.38           | 2.355                          | 1261.07            | 2969.42            |
| A_68_P25962148 | chr8:75095909-75095953                            | NM_144534:-71     | Tmem38a    | DIVERGENT_PROMOTER     | 0.38                                                         | 10.363                         | 4465.03            | 46269.56           | 3.939                          | 3690.29            | 14535.95           |
| A_68_P23298058 | chr4:129373895-129373939                          | NM_199305:166     | Tmem39b    | INSIDE                 | 0.349                                                        | 6.958                          | 3057.48            | 21274.87           | 2.43                           | 2861.17            | 6953.66            |
| A_68_P23298057 | chr4:129373770-129373814                          | NM_199305:290     | Tmem39b    | INSIDE                 | 0.403                                                        | 3.624                          | 1807.99            | 6552.53            | 1.46                           | 1437.68            | 2098.96            |
| A_68_P30595261 | chr16:21947632-21947676                           | NM_025693:-29     | Tmem41a    | PROMOTER               | 0.617                                                        | 2.893                          | 1256.19            | 3633.66            | 1.786                          | 1074.19            | 1918.16            |
| A_68_P25411125 | chr7:117129431-117129475                          | NM_153525:292     | Tmem41b    | INSIDE                 | 0.123                                                        | 11.575                         | 4584.48            | 53066.92           | 1.42                           | 3413.63            | 4846.92            |
| A_68_P26892620 | chr9:122930391-122930435                          | NM_001164823:-31  | Tmem42     | PROMOTER               | 0.634                                                        | 2.564                          | 1851.59            | 4748.15            | 1.626                          | 1515.72            | 2464.51            |
| A_68_P30642390 | chr16:30550650-30550694                           | NM_172614:-8      | Tmem44     | PROMOTER               | 0.238                                                        | 10.087                         | 574.43             | 5794.35            | 2.404                          | 460.81             | 1107.58            |
| A_68_P30642387 | chr16:30550318-30550362                           | NM_172614:324     | Tmem44     | INSIDE                 | 0.377                                                        | 4.340                          | 2343.51            | 10171.71           | 1.634                          | 1863.95            | 3045.99            |
| A_68_P32488667 | chrX:78316560-78316604                            | NM_138751:600     | Tmem47     | INSIDE                 | 0.364                                                        | 9.770                          | 3736.22            | 36502.81           | 3.557                          | 4584.15            | 16303.61           |
| A_68_P32488661 | chrX:78315918-78315962                            | NM_138751:-42     | Tmem47     | PROMOTER               | 0.515                                                        | 6.359                          | 1495.91            | 9512.26            | 3.276                          | 1540.05            | 5045.95            |
| A_68_P23190148 | chr4:107040619-107040663                          | NM_028355:252     | Tmem48     | INSIDE                 | 0.559                                                        | 16.085                         | 1282.45            | 20627.92           | 8.992                          | 1067.63            | 9600.44            |
| A_68_P23190150 | chr4:107040819-107040863                          | NM_028355:452     | Tmem48     | INSIDE                 | 0.579                                                        | 0.654                          | 1441.41            | 942.88             | 0.379                          | 1029.63            | 390.26             |
| A_68_P27507134 | chr10:121533967-121534011                         | NM_153059:170     | Tmem5      | INSIDE                 | 0.383                                                        | 7.575                          | 20524.39           | 155477.00          | 2.899                          | 17853.07           | 51758.16           |
| A_68_P27507137 | chr10:121534278-121534322                         | NM_153059:-142    | Tmem5      | PROMOTER               | 0.585                                                        | 2.895                          | 2466.96            | 7141.65            | 1.694                          | 1911.49            | 3238.85            |
| A_68_P23233186 | chr4:116924691-116924735                          | NM_026837:119     | Tmem53     | INSIDE                 | 0.555                                                        | 0.473                          | 1223.37            | 579.07             | 0.263                          | 980.03             | 257.60             |
| A_68_P23294939 | chr4:128782828-128782872                          | NM_025452:77      | Tmem54     | INSIDE                 | 0.228                                                        | 7.414                          | 3310.08            | 24542.52           | 1.693                          | 2551.47            | 4320.85            |
| A_68_P23294938 | chr4:128782726-128782770                          | NM_025452:-25     | Tmem54     | PROMOTER               | 0.457                                                        | 8.139                          | 2930.77            | 23852.26           | 3.721                          | 2553.34            | 9499.98            |
| A_68_P29599189 | chr14:51550570-51550614                           | NM_001033271:-68  | Tmem55b    | PROMOTER               | 0.217                                                        | 25.358                         | 4891.25            | 124034.70          | 5.507                          | 4781.19            | 26328.79           |
| A_68_P29599187 | chr14:51550282-51550326                           | NM_001033271:220  | Tmem55b    | INSIDE                 | 0.421                                                        | 20.208                         | 786.60             | 15896.01           | 8.517                          | 995.08             | 8474.90            |
| A_68_P22475538 | chr3:120965447-120965491                          | NM_178936:766     | Tmem56     | INSIDE                 | 0.54                                                         | 5.628                          | 1426.56            | 8028.14            | 3.037                          | 1280.79            | 3889.84            |
| A_68_P23325212 | chr4:134408532-134408576                          | NM_025382:706     | Tmem57     | INSIDE                 | 0.64                                                         | 2.773                          | 2056.23            | 5701.01            | 1.774                          | 1814.54            | 3218.63            |
| A_68_P25952182 | chr8:73013396-73013440                            | NM_182991:-2161   | Tmem59l    | DIVERGENT_PROMOTER     | 0.178                                                        | 11.840                         | 1750.32            | 20723.04           | 2.104                          | 1499.60            | 3155.63            |
| A_68_P31202525 | chr17:45822791-45822835                           | NM_198167:355     | Tmem63b    | INSIDE                 | 0.241                                                        | 8.639                          | 1267.86            | 10953.44           | 2.086                          | 1034.41            | 2157.66            |
| A_68_P22749333 | chr4:15193561-15193605                            | NM_181401:616     | Tmem64     | INSIDE                 | 0.529                                                        | 0.395                          | 2602.34            | 1027.26            | 0.209                          | 1907.84            | 398.71             |
| A_68_P30250398 | chr15:58654714-58654758                           | NM_175212:246     | Tmem65     | INSIDE                 | 0.664                                                        | 2.611                          | 674.70             | 1761.92            | 1.733                          | 634.00             | 1098.67            |
| A_68_P25772480 | chr8:35217817-35217861                            | NM_026432:222     | Tmem66     | INSIDE                 | 0.459                                                        | 3.774                          | 1308.99            | 4940.73            | 1.733                          | 1196.71            | 2073.93            |

| ProbeName      | Target position of probe on CpG island microarray | TargetID           | GeneSymbol | CpG island Description | Ratio of relative methylation (TiO <sub>2</sub> -NP/Vehicle) | Sham group                     |                    |                    | TiO <sub>2</sub> -H group      |                    |                    |
|----------------|---------------------------------------------------|--------------------|------------|------------------------|--------------------------------------------------------------|--------------------------------|--------------------|--------------------|--------------------------------|--------------------|--------------------|
|                |                                                   |                    |            |                        |                                                              | Relative methylation (Cy5/Cy3) | Cy3 signal (Input) | Cy5 signal (MeDIP) | Relative methylation (Cy5/Cy3) | Cy3 signal (Input) | Cy5 signal (MeDIP) |
| A_68_P22313145 | chr3:88136905-88136949                            | NM_024246:1429     | Tmem79     | INSIDE                 | 0.582                                                        | 4.405                          | 1759.64            | 7751.48            | 2.565                          | 1243.81            | 3190.56            |
| A_68_P31108362 | chr17:26250244-26250288                           | NM_021793:6        | Tmem8      | INSIDE                 | 0.509                                                        | 4.113                          | 1706.38            | 7017.93            | 2.092                          | 1422.94            | 2976.35            |
| A_68_P25588178 | chr7:148514084-148514128                          | NR_024509:78       | Tmem80     | INSIDE                 | 0.084                                                        | 24.609                         | 2565.37            | 63131.64           | 2.055                          | 2214.69            | 4551.27            |
| A_68_P21621499 | chr2:128643821-128643865                          | NM_028248:-196     | Tmem87b    | PROMOTER               | 0.068                                                        | 2.992                          | 1713.07            | 5124.76            | 0.204                          | 1273.81            | 259.35             |
| A_68_P23440605 | chr4:155158694-155158738                          | NM_001033394:1267  | Tmem88b    | INSIDE                 | 0.517                                                        | 0.407                          | 1277.10            | 519.44             | 0.21                           | 1035.94            | 217.90             |
| A_68_P22873079 | chr4:43682099-43682143                            | NM_001085508:278   | Tmem8b     | INSIDE                 | 0.256                                                        | 10.648                         | 2460.90            | 26204.62           | 2.729                          | 2170.74            | 5923.37            |
| A_68_P28599774 | chr12:86039811-86039855                           | NM_001033334:-75   | Tmem90a    | PROMOTER               | 0.378                                                        | 4.512                          | 2658.19            | 11995.07           | 1.704                          | 2128.36            | 3627.33            |
| A_68_P28599772 | chr12:86039566-86039610                           | NM_001033334:169   | Tmem90a    | INSIDE                 | 0.38                                                         | 5.985                          | 2837.29            | 16982.16           | 2.277                          | 2615.82            | 5956.27            |
| A_68_P28599771 | chr12:86039461-86039505                           | NM_001033334:275   | Tmem90a    | INSIDE                 | 0.564                                                        | 2.966                          | 1309.61            | 3883.86            | 1.672                          | 1099.44            | 1837.86            |
| A_68_P27915637 | chr11:72990334-72990378                           | NM_001168470:154   | Tmem93     | INSIDE                 | 0.665                                                        | 2.880                          | 1176.03            | 3386.91            | 1.915                          | 983.77             | 1884.05            |
| A_68_P27956496 | chr11:80623682-80623726                           | NM_029537:-212     | Tmem98     | PROMOTER               | 0.398                                                        | 0.548                          | 963.57             | 528.18             | 0.218                          | 817.98             | 178.63             |
| A_68_P27956499 | chr11:80624028-80624072                           | NM_029537:134      | Tmem98     | INSIDE                 | 0.38                                                         | 1.414                          | 1155.29            | 1633.98            | 0.537                          | 1082.04            | 581.44             |
| A_68_P22886521 | chr4:46051942-46051986                            | NM_021883:-129     | Tmod1      | PROMOTER               | 0.337                                                        | 5.604                          | 2526.95            | 14160.11           | 1.888                          | 2346.85            | 4430.35            |
| A_68_P27340458 | chr10:90644261-90644305                           | NM_001080129:-9955 | Tmpo       | PROMOTER               | 0.409                                                        | 0.486                          | 1063.40            | 517.27             | 0.199                          | 849.06             | 168.99             |
| A_68_P30999920 | chr16:97832492-97832536                           | NM_015775:288      | Tmprs2     | INSIDE                 | 0.348                                                        | 0.582                          | 1791.24            | 1042.51            | 0.203                          | 1338.42            | 271.34             |
| A_68_P24544425 | chr6:72908782-72908826                            | NM_001190327:-62   | Tmsb10     | PROMOTER               | 0.52                                                         | 5.198                          | 1709.89            | 8887.22            | 2.701                          | 1391.61            | 3758.81            |
| A_68_P27416798 | chr10:105011030-105011074                         | NM_177368:483      | Tmtc2      | INSIDE                 | 0.634                                                        | 2.428                          | 1654.31            | 4017.21            | 1.54                           | 1382.22            | 2129.21            |
| A_68_P27392328 | chr10:99950341-99950385                           | NM_001110013:-381  | Tmtc3      | DIVERGENT_PROMOTER     | 0.548                                                        | 0.422                          | 4037.31            | 1703.24            | 0.231                          | 2906.99            | 672.67             |
| A_68_P29964713 | chr14:123381923-123381967                         | NM_028651:539      | Tmtc4      | INSIDE                 | 0.594                                                        | 9.272                          | 1127.80            | 10457.54           | 5.51                           | 983.30             | 5418.19            |
| A_68_P29964714 | chr14:123382020-123382064                         | NM_028651:441      | Tmtc4      | INSIDE                 | 0.664                                                        | 5.492                          | 363.50             | 1996.21            | 3.647                          | 278.18             | 1014.45            |
| A_68_P23541916 | chr5:23953751-23953795                            | NM_022418:-108     | Tmub1      | DIVERGENT_PROMOTER     | 0.328                                                        | 0.492                          | 1965.10            | 966.42             | 0.162                          | 1426.03            | 230.37             |
| A_68_P23541913 | chr5:23953475-23953519                            | NM_022418:168      | Tmub1      | INSIDE                 | 0.612                                                        | 4.386                          | 1203.36            | 5277.55            | 2.686                          | 1014.42            | 2724.67            |
| A_68_P28520555 | chr12:71554358-71554402                           | NM_028339:240      | Tmx1       | INSIDE                 | 0.045                                                        | 8.646                          | 1518.30            | 12850.62           | 0.385                          | 1285.03            | 494.57             |
| A_68_P31915394 | chr18:90679335-90679379                           | NM_198295:-189     | Tmx3       | PROMOTER               | 0.625                                                        | 0.682                          | 891.08             | 607.43             | 0.426                          | 719.80             | 306.74             |
| A_68_P28744115 | chr12:112680803-112680847                         | NM_009396:-47      | Tnfaip2    | PROMOTER               | 0.638                                                        | 0.710                          | 1804.36            | 1281.50            | 0.453                          | 1392.86            | 630.78             |
| A_68_P26523853 | chr9:53916041-53916085                            | NM_001033535:156   | Tnfaip8l3  | INSIDE                 | 0.617                                                        | 0.709                          | 1251.44            | 887.81             | 0.438                          | 1063.38            | 465.32             |
| A_68_P31092981 | chr17:23813793-23813837                           | NM_001161746:602   | Tnfirf12a  | INSIDE                 | 0.514                                                        | 4.322                          | 3393.40            | 14667.34           | 2.223                          | 2817.50            | 6263.63            |
| A_68_P31092979 | chr17:23813505-23813549                           | NM_001161746:890   | Tnfirf12a  | INSIDE                 | 0.536                                                        | 0.266                          | 2348.19            | 624.69             | 0.143                          | 1622.35            | 231.23             |
| A_68_P31092980 | chr17:23813651-23813695                           | NM_001161746:744   | Tnfirf12a  | INSIDE                 | 0.564                                                        | 0.107                          | 4339.41            | 465.40             | 0.06                           | 2838.89            | 171.66             |
| A_68_P27846772 | chr11:60960787-60960831                           | NM_021349:6472     | Tnfirf13b  | INSIDE                 | 0.124                                                        | 3.188                          | 2291.03            | 7303.32            | 0.395                          | 1736.25            | 686.66             |
| A_68_P29647966 | chr14:61656769-61656813                           | NM_001164155:34    | Tnfirf19   | INSIDE                 | 0.416                                                        | 3.329                          | 6945.07            | 23118.85           | 1.384                          | 5492.60            | 7600.46            |
| A_68_P24820215 | chr6:125311848-125311892                          | NM_011609:12130    | Tnfirf1a   | INSIDE                 | 0.607                                                        | 5.962                          | 885.09             | 5277.24            | 3.619                          | 690.14             | 2497.94            |
| A_68_P24820216 | chr6:125311932-125311976                          | NM_011609:12214    | Tnfirf1a   | INSIDE                 | 0.618                                                        | 0.527                          | 1365.02            | 719.29             | 0.325                          | 1061.45            | 345.42             |
| A_68_P31187135 | chr17:43153738-43153782                           | NM_178589:257      | Tnfirf21   | INSIDE                 | 0.516                                                        | 7.506                          | 2106.67            | 15812.32           | 3.877                          | 1661.17            | 6439.85            |
| A_68_P31187140 | chr17:43154341-43154385                           | NM_178589:859      | Tnfirf21   | INSIDE                 | 0.644                                                        | 0.391                          | 4120.10            | 1610.04            | 0.252                          | 2750.37            | 691.98             |
| A_68_P31187133 | chr17:43153476-43153520                           | NM_178589:-5       | Tnfirf21   | PROMOTER               | 0.446                                                        | 3.625                          | 981.34             | 3557.05            | 1.617                          | 805.54             | 1302.89            |
| A_68_P29745018 | chr14:78707731-78707775                           | NM_011613:98       | Tnfirf11   | INSIDE                 | 0.567                                                        | 6.794                          | 2233.52            | 15174.63           | 3.853                          | 1801.02            | 6939.85            |
| A_68_P31260061 | chr17:57244849-57244893                           | NM_009404:63       | Tnfirf9    | INSIDE                 | 0.425                                                        | 0.278                          | 2052.86            | 570.07             | 0.118                          | 1459.95            | 172.12             |
| A_68_P27812935 | chr11:54769524-54769568                           | NM_001199275:78    | Tnip1      | INSIDE                 | 0.453                                                        | 3.224                          | 1604.15            | 5172.50            | 1.462                          | 1358.52            | 1986.03            |
| A_68_P23594734 | chr5:34856584-34856628                            | NM_139064:22       | Tnip2      | INSIDE                 | 0.574                                                        | 0.493                          | 2572.46            | 1267.61            | 0.283                          | 1987.28            | 561.91             |
| A_68_P30653563 | chr16:32644599-32644643                           | NM_001110147:-108  | Tnk2       | PROMOTER               | 0.483                                                        | 0.456                          | 1095.38            | 499.73             | 0.22                           | 909.46             | 200.39             |
| A_68_P25777209 | chr8:36028037-36028081                            | NM_175091:686      | Tnks       | INSIDE                 | 0.422                                                        | 0.574                          | 2763.96            | 1586.46            | 0.242                          | 1924.84            | 466.31             |
| A_68_P21396039 | chr2:84888658-84888702                            | NM_001081260:-1936 | Tnks1bp1   | PROMOTER               | 0.198                                                        | 0.316                          | 3722.50            | 1177.13            | 0.063                          | 2978.83            | 186.42             |
| A_68_P21396040 | chr2:84888732-84888776                            | NM_001081260:-1862 | Tnks1bp1   | PROMOTER               | 0.323                                                        | 0.403                          | 1626.88            | 656.20             | 0.13                           | 1310.37            | 170.89             |
| A_68_P21396036 | chr2:84888342-84888387                            | NM_001081260:-2252 | Tnks1bp1   | PROMOTER               | 0.402                                                        | 0.171                          | 8581.65            | 1464.96            | 0.069                          | 6077.22            | 416.81             |
| A_68_P32092159 | chr19:36908711-36908755                           | NM_001163635:11    | Tnks2      | INSIDE                 | 0.606                                                        | 3.473                          | 859.55             | 2985.20            | 2.103                          | 660.38             | 1388.73            |



| ProbeName      | Target position of probe on CpG island microarray | TargetID           | GeneSymbol | CpG island Description | Ratio of relative methylation (TiO <sub>2</sub> -NP/Vehicle) | Sham group                     |                    |                    | TiO <sub>2</sub> -H group      |                    |                    |
|----------------|---------------------------------------------------|--------------------|------------|------------------------|--------------------------------------------------------------|--------------------------------|--------------------|--------------------|--------------------------------|--------------------|--------------------|
|                |                                                   |                    |            |                        |                                                              | Relative methylation (Cy5/Cy3) | Cy3 signal (Input) | Cy5 signal (MeDIP) | Relative methylation (Cy5/Cy3) | Cy3 signal (Input) | Cy5 signal (MeDIP) |
| A_68_P29260367 | chr13:99696244-99696288                           | NM_178716:73       | Tnpo1      | INSIDE                 | 0.634                                                        | 2.741                          | 1308.08            | 3586.09            | 1.739                          | 1086.83            | 1889.51            |
| A_68_P26023340 | chr8:87562055-87562099                            | NM_001122843:1010  | Tnpo2      | INSIDE                 | 0.564                                                        | 3.659                          | 3374.39            | 12347.17           | 2.065                          | 2565.94            | 5298.06            |
| A_68_P26023335 | chr8:87561478-87561522                            | NM_001122843:434   | Tnpo2      | INSIDE                 | 0.16                                                         | 1.404                          | 4726.94            | 6636.08            | 0.224                          | 3358.97            | 752.52             |
| A_68_P26023334 | chr8:87561401-87561445                            | NM_001122843:356   | Tnpo2      | INSIDE                 | 0.319                                                        | 0.733                          | 15628.91           | 11460.78           | 0.234                          | 10690.96           | 2502.35            |
| A_68_P24327618 | chr6:29559429-29559473                            | NM_177296:157      | Tnpo3      | INSIDE                 | 0.488                                                        | 0.375                          | 1305.50            | 489.76             | 0.183                          | 941.43             | 172.44             |
| A_68_P24153558 | chr5:143580250-143580294                          | NM_001122730:-1206 | Tnrc18     | PROMOTER               | 0.332                                                        | 9.682                          | 897.85             | 8692.93            | 3.214                          | 772.06             | 2481.23            |
| A_68_P24153530 | chr5:143576863-143576907                          | NM_001122730:2182  | Tnrc18     | INSIDE                 | 0.479                                                        | 0.684                          | 2136.63            | 1460.96            | 0.328                          | 1759.22            | 576.49             |
| A_68_P24153574 | chr5:143581988-143582032                          | NM_001122730:-2944 | Tnrc18     | PROMOTER               | 0.207                                                        | 2.695                          | 2735.12            | 7369.82            | 0.558                          | 2005.54            | 1119.83            |
| A_68_P24153528 | chr5:143576639-143576683                          | NM_001122730:2406  | Tnrc18     | INSIDE                 | 0.612                                                        | 2.758                          | 700.40             | 1931.98            | 1.687                          | 629.58             | 1062.09            |
| A_68_P25482572 | chr7:130267793-130267837                          | NM_144925:416      | Tnrc6a     | INSIDE                 | 0.468                                                        | 3.642                          | 716.98             | 2611.43            | 1.706                          | 652.87             | 1113.63            |
| A_68_P30374043 | chr15:80542551-80542595                           | NM_144812:830      | Tnrc6b     | INSIDE                 | 0.133                                                        | 112.825                        | 2840.44            | 320614.30          | 14.991                         | 2573.79            | 38584.84           |
| A_68_P30374042 | chr15:80542447-80542491                           | NM_144812:726      | Tnrc6b     | INSIDE                 | 0.275                                                        | 0.322                          | 2707.92            | 871.68             | 0.088                          | 1936.59            | 171.14             |
| A_68_P30374041 | chr15:80542355-80542399                           | NM_144812:634      | Tnrc6b     | INSIDE                 | 0.554                                                        | 0.179                          | 2586.17            | 461.86             | 0.099                          | 1960.30            | 194.05             |
| A_68_P28166382 | chr11:117515746-117515790                         | NM_198022:166      | Tnrc6c     | INSIDE                 | 0.404                                                        | 0.318                          | 1728.61            | 550.43             | 0.129                          | 1370.32            | 176.43             |
| A_68_P28166391 | chr11:117517129-117517173                         | NM_198022:1548     | Tnrc6c     | INSIDE                 | 0.62                                                         | 4.025                          | 3118.10            | 12549.69           | 2.495                          | 2399.34            | 5985.44            |
| A_68_P27579284 | chr11:8564125-8564169                             | NM_001083587:392   | Tns3       | INSIDE                 | 0.156                                                        | 36.115                         | 1589.21            | 57394.03           | 5.643                          | 1508.83            | 8514.28            |
| A_68_P27579286 | chr11:8564350-8564394                             | NM_001083587:166   | Tns3       | INSIDE                 | 0.353                                                        | 0.499                          | 1334.80            | 666.62             | 0.176                          | 975.09             | 171.74             |
| A_68_P27579285 | chr11:8564248-8564292                             | NM_001083587:268   | Tns3       | INSIDE                 | 0.629                                                        | 2.330                          | 2351.62            | 5478.42            | 1.465                          | 1712.12            | 2507.59            |
| A_68_P31155254 | chr17:34817160-34817204                           | NM_031176:9703     | Tnxb       | INSIDE                 | 0.553                                                        | 3.067                          | 1904.72            | 5841.78            | 1.695                          | 1471.73            | 2494.94            |
| A_68_P28031425 | chr11:94073133-94073177                           | NM_009427:387      | Tob1       | INSIDE                 | 0.374                                                        | 0.597                          | 867.94             | 518.38             | 0.224                          | 757.15             | 169.32             |
| A_68_P28031422 | chr11:94072689-94072733                           | NM_009427:-57      | Tob1       | PROMOTER               | 0.234                                                        | 6.539                          | 3149.27            | 20591.70           | 1.528                          | 2636.85            | 4030.19            |
| A_68_P28031427 | chr11:94073436-94073480                           | NM_009427:691      | Tob1       | INSIDE                 | 0.64                                                         | 2.800                          | 629.15             | 1761.61            | 1.791                          | 671.49             | 1202.80            |
| A_68_P30380067 | chr15:81688792-81688836                           | NM_020507:-58      | Tob2       | PROMOTER               | 0.179                                                        | 21.293                         | 2374.53            | 50560.36           | 3.807                          | 2014.73            | 7670.88            |
| A_68_P30380065 | chr15:81688607-81688651                           | NM_020507:128      | Tob2       | INSIDE                 | 0.61                                                         | 0.112                          | 3973.88            | 444.83             | 0.068                          | 2740.27            | 187.00             |
| A_68_P25591624 | chr7:149088169-149088213                          | NM_023764:121      | Tollip     | INSIDE                 | 0.562                                                        | 2.617                          | 1276.58            | 3341.35            | 1.472                          | 1125.43            | 1656.49            |
| A_68_P25971564 | chr8:77557785-77557829                            | NM_001136259:222   | Tom1       | INSIDE                 | 0.553                                                        | 0.520                          | 1080.80            | 562.52             | 0.288                          | 781.92             | 225.08             |
| A_68_P28013349 | chr11:90548688-90548732                           | NM_028011:205      | Tom11l     | INSIDE                 | 0.233                                                        | 1.840                          | 1262.31            | 2322.54            | 0.429                          | 992.28             | 425.51             |
| A_68_P28013351 | chr11:90548942-90548986                           | NM_028011:-49      | Tom11l     | PROMOTER               | 0.517                                                        | 2.867                          | 1444.15            | 4140.43            | 1.482                          | 1369.25            | 2029.56            |
| A_68_P27842503 | chr11:60166349-60166393                           | NM_001039092:37    | Tom112     | INSIDE                 | 0.339                                                        | 5.341                          | 4009.41            | 21414.98           | 1.812                          | 3569.69            | 6468.11            |
| A_68_P21815977 | chr2:163896377-163896421                          | NM_025996:440      | Tommm34    | INSIDE                 | 0.333                                                        | 0.602                          | 2950.43            | 1774.69            | 0.2                            | 2067.23            | 414.37             |
| A_68_P24994887 | chr7:20300662-20300706                            | NM_001109748:94    | Tommm40    | INSIDE                 | 0.632                                                        | 0.717                          | 10300.91           | 7384.59            | 0.453                          | 7771.63            | 3522.75            |
| A_68_P31213639 | chr17:47826066-47826110                           | NM_001164729:-753  | Tommm6     | DIVERGENT_PROMOTER     | 0.435                                                        | 1.628                          | 6013.85            | 9789.13            | 0.707                          | 4310.25            | 3049.35            |
| A_68_P30784286 | chr16:57122130-57122174                           | NM_138599:326      | Tommm70a   | INSIDE                 | 0.253                                                        | 13.268                         | 1752.38            | 23250.74           | 3.361                          | 1570.51            | 5279.04            |
| A_68_P30784285 | chr16:57122018-57122062                           | NM_138599:214      | Tommm70a   | INSIDE                 | 0.27                                                         | 40.722                         | 3732.15            | 151981.90          | 10.996                         | 3611.09            | 39706.31           |
| A_68_P30349539 | chr15:76462358-76462402                           | NM_183091:7979     | Tonsl      | INSIDE                 | 0.212                                                        | 30.616                         | 6521.23            | 199654.90          | 6.504                          | 6693.08            | 43532.96           |
| A_68_P21796146 | chr2:160471717-160471761                          | NM_009408:106      | Top1       | INSIDE                 | 0.47                                                         | 0.316                          | 1848.24            | 584.65             | 0.149                          | 1349.19            | 200.59             |
| A_68_P21796147 | chr2:160471841-160471885                          | NM_009408:230      | Top1       | INSIDE                 | 0.458                                                        | 0.665                          | 986.43             | 656.45             | 0.305                          | 856.90             | 261.12             |
| A_68_P29428732 | chr14:17198090-17198134                           | NM_009409:393      | Top2b      | INSIDE                 | 0.476                                                        | 7.214                          | 854.61             | 6165.09            | 3.433                          | 692.42             | 2376.91            |
| A_68_P29428731 | chr14:17197979-17198023                           | NM_009409:281      | Top2b      | INSIDE                 | 0.529                                                        | 3.610                          | 1639.46            | 5918.14            | 1.91                           | 1397.51            | 2668.76            |
| A_68_P30570745 | chr16:16871029-16871073                           | NM_011624:67       | Top3b      | INSIDE                 | 0.604                                                        | 3.451                          | 1907.71            | 6584.09            | 2.083                          | 1638.04            | 3412.33            |
| A_68_P22856580 | chr4:40216716-40216760                            | NM_134097:136      | Topors     | INSIDE                 | 0.515                                                        | 0.509                          | 1360.31            | 692.41             | 0.262                          | 1102.10            | 289.03             |
| A_68_P22856570 | chr4:40215530-40215574                            | NM_134097:1322     | Topors     | INSIDE                 | 0.408                                                        | 0.588                          | 901.22             | 529.90             | 0.24                           | 711.45             | 170.83             |
| A_68_P21106251 | chr2:30822965-30823009                            | NM_144884:452      | Tor1a      | INSIDE                 | 0.406                                                        | 0.254                          | 3522.14            | 893.42             | 0.103                          | 2502.37            | 257.40             |
| A_68_P20741243 | chr1:157883361-157883407                          | NM_001160182:219   | Tor1aip2   | INSIDE                 | 0.423                                                        | 0.383                          | 1508.62            | 577.07             | 0.162                          | 1045.63            | 169.36             |
| A_68_P21106144 | chr2:30808670-30808714                            | NM_133673:172      | Tor1b      | INSIDE                 | 0.611                                                        | 0.640                          | 989.26             | 633.41             | 0.392                          | 752.85             | 294.76             |
| A_68_P21117289 | chr2:32612990-32613034                            | NM_152800:222      | Tor2a      | INSIDE                 | 0.378                                                        | 15.608                         | 1375.65            | 21471.14           | 5.893                          | 1434.81            | 8454.75            |

| ProbeName       | Target position of probe on CpG island microarray | TargetID           | GeneSymbol | CpG island Description | Ratio of relative methylation (TiO <sub>2</sub> -NP/Vehicle) | Sham group                     |                    |                    | TiO <sub>2</sub> -H group      |                    |                    |
|-----------------|---------------------------------------------------|--------------------|------------|------------------------|--------------------------------------------------------------|--------------------------------|--------------------|--------------------|--------------------------------|--------------------|--------------------|
|                 |                                                   |                    |            |                        |                                                              | Relative methylation (Cy5/Cy3) | Cy3 signal (Input) | Cy5 signal (MeDIP) | Relative methylation (Cy5/Cy3) | Cy3 signal (Input) | Cy5 signal (MeDIP) |
| A_68_P21117286  | chr2:32612762-32612806                            | NM_152800:-6       | Tor2a      | PROMOTER               | 0.65                                                         | 6.598                          | 1893.50            | 12493.94           | 4.289                          | 1584.66            | 6795.89            |
| A_68_P20744276  | chr1:158604245-158604289                          | NM_023141:204      | Tor3a      | INSIDE                 | 0.405                                                        | 0.371                          | 1435.21            | 532.09             | 0.15                           | 1106.57            | 166.13             |
| A_68_P22708703  | chr4:6917953-6917997                              | NM_145711:-104     | Tox        | PROMOTER               | 0.512                                                        | 6.673                          | 5323.35            | 35524.89           | 3.419                          | 4566.98            | 15612.38           |
| A_68_P26696146  | chr9:85737161-85737205                            | NM_001164792:724   | Tpbp       | INSIDE                 | 0.361                                                        | 0.238                          | 8628.63            | 2057.76            | 0.086                          | 5667.50            | 487.59             |
| A_68_P26696145  | chr9:85737079-85737123                            | NM_001164792:642   | Tpbp       | INSIDE                 | 0.578                                                        | 0.567                          | 3144.98            | 1781.96            | 0.328                          | 2440.16            | 799.75             |
| A_68_P26696139  | chr9:85736432-85736476                            | NM_001164792:-4    | Tpbp       | PROMOTER               | 0.418                                                        | 4.537                          | 844.81             | 3833.31            | 1.899                          | 753.71             | 1430.94            |
| A_68_P26696141  | chr9:85736583-85736627                            | NM_001164792:146   | Tpbp       | INSIDE                 | 0.214                                                        | 2.716                          | 1224.87            | 3326.23            | 0.58                           | 987.46             | 572.98             |
| A_68_P21910960  | chr2:181231996-181232040                          | NM_025482:61       | Tpd52l2    | INSIDE                 | 0.341                                                        | 5.440                          | 815.45             | 4436.17            | 1.855                          | 786.81             | 1459.34            |
| A_68_P26596714  | chr9:66891475-66891519                            | NM_001164252:182   | Tpm1       | INSIDE                 | 0.392                                                        | 7.049                          | 866.05             | 6104.98            | 2.764                          | 768.62             | 2124.32            |
| A_68_P26596750  | chr9:66896100-66896144                            | NM_001164252:-4444 | Tpm1       | PROMOTER               | 0.491                                                        | 0.310                          | 1620.63            | 502.39             | 0.152                          | 1147.51            | 174.68             |
| A_68_P26596760  | chr9:66897350-66897394                            | NM_001164249:-352  | Tpm1       | PROMOTER               | 0.378                                                        | 0.597                          | 900.28             | 537.83             | 0.226                          | 741.73             | 167.37             |
| A_68_P26596757  | chr9:66897011-66897055                            | NM_001164249:-12   | Tpm1       | PROMOTER               | 0.51                                                         | 1.397                          | 3767.27            | 5261.26            | 0.712                          | 2996.00            | 2133.43            |
| A_68_P22872185  | chr4:43536399-43536443                            | NM_009416:-160     | Tpm2       | PROMOTER               | 0.464                                                        | 3.209                          | 1930.10            | 6193.54            | 1.489                          | 1582.63            | 2356.58            |
| A_68_P22323362  | chr3:89884192-89884236                            | NM_022314:7599     | Tpm3       | INSIDE                 | 0.433                                                        | 3.913                          | 5344.46            | 20915.18           | 1.694                          | 3927.64            | 6654.70            |
| A_68_P25959798  | chr8:74659599-74659643                            | NM_001001491:430   | Tpm4       | INSIDE                 | 0.448                                                        | 0.152                          | 3740.26            | 570.33             | 0.068                          | 2571.11            | 175.59             |
| A_68_P25959792  | chr8:74658995-74659039                            | NM_001001491:-174  | Tpm4       | PROMOTER               | 0.619                                                        | 0.191                          | 8003.40            | 1525.75            | 0.118                          | 5199.51            | 613.25             |
| A_68_P29011270  | chr13:47138723-47138767                           | NM_016785:-158     | Tpmt       | DIVERGENT_PROMOTER     | 0.211                                                        | 9.508                          | 4376.17            | 41608.75           | 2.006                          | 4031.00            | 8085.64            |
| A_68_P20191548  | chr1:43991025-43991069                            | NM_009418:195      | Tpp2       | INSIDE                 | 0.352                                                        | 13.406                         | 942.15             | 12630.36           | 4.725                          | 769.08             | 3633.53            |
| A_68_P29143670  | chr13:74147870-74147914                           | NM_182839:1026     | Tppp       | INSIDE                 | 0.231                                                        | 14.355                         | 976.04             | 14010.85           | 3.319                          | 933.12             | 3096.58            |
| A_68_P29143669  | chr13:74147784-74147828                           | NM_182839:940      | Tppp       | INSIDE                 | 0.561                                                        | 0.437                          | 1526.28            | 666.69             | 0.245                          | 1164.50            | 285.30             |
| A_68_P26134000  | chr8:107995392-107995436                          | NM_026481:-92      | Tppp3      | PROMOTER               | 0.199                                                        | 15.484                         | 2639.26            | 40866.47           | 3.086                          | 3013.48            | 9299.17            |
| A_68_P23429475  | chr4:153535140-153535184                          | NM_026388:-369     | Tprgl      | DIVERGENT_PROMOTER     | 0.341                                                        | 0.217                          | 2974.64            | 646.19             | 0.074                          | 2313.46            | 171.34             |
| A_68_P24092031  | chr5:130555095-130555139                          | NM_001130476:-239  | Tpst1      | PROMOTER               | 0.458                                                        | 5.569                          | 796.40             | 4434.88            | 2.551                          | 689.68             | 1759.44            |
| A_68_P24092036  | chr5:130555652-130555696                          | NM_001130476:319   | Tpst1      | INSIDE                 | 0.597                                                        | 0.425                          | 1851.35            | 786.24             | 0.254                          | 1394.10            | 353.43             |
| A_68_P23991345  | chr5:112736931-112736975                          | NM_009419:31226    | Tpst2      | INSIDE                 | 0.538                                                        | 4.764                          | 1112.34            | 5299.03            | 2.565                          | 880.04             | 2257.47            |
| A_68_P23991123  | chr5:112705779-112705823                          | NM_009419:74       | Tpst2      | INSIDE                 | 0.662                                                        | 4.030                          | 936.59             | 3774.58            | 2.666                          | 801.63             | 2137.48            |
| A_68_P24431872  | chr6:49213460-49213504                            | NM_198102:569      | Tra2a      | INSIDE                 | 0.318                                                        | 0.521                          | 1990.66            | 1036.78            | 0.166                          | 1478.70            | 245.04             |
| A_68_P30596855  | chr16:22266102-22266148                           | NM_009186:-122     | Tra2b      | PROMOTER               | 0.651                                                        | 0.377                          | 1975.21            | 745.12             | 0.246                          | 1456.10            | 357.54             |
| A_68_P30596854  | chr16:22265994-22266038                           | NM_009186:-14      | Tra2b      | PROMOTER               | 0.334                                                        | 0.632                          | 3059.54            | 1934.50            | 0.211                          | 2265.06            | 478.23             |
| A_68_P21072876  | chr2:25402210-25402254                            | NM_009422:182      | Traf2      | INSIDE                 | 0.449                                                        | 0.409                          | 3098.55            | 1266.69            | 0.184                          | 2253.42            | 413.94             |
| A_68_P20442836  | chr1:93391186-93391230                            | NM_028718:-36      | Traf3ip1   | PROMOTER               | 0.636                                                        | 2.559                          | 1105.60            | 2828.68            | 1.626                          | 1050.47            | 1708.11            |
| A_68_P22492339  | chr3:124023918-124023962                          | NM_146140:-14      | Tram1l1    | PROMOTER               | 0.302                                                        | 6.544                          | 1821.77            | 11922.35           | 1.977                          | 1633.03            | 3229.14            |
| A_68_P26828805  | chr9:111214091-111214135                          | NM_001164659:-130  | Trank1     | PROMOTER               | 0.508                                                        | 3.754                          | 1684.45            | 6323.56            | 1.907                          | 1446.14            | 2757.24            |
| A_68_P227273026 | chr10:77707095-77707139                           | NM_001081055:271   | Trappe10   | INSIDE                 | 0.35                                                         | 0.282                          | 2199.14            | 619.51             | 0.099                          | 1755.30            | 173.11             |
| A_68_P25615130  | chr8:3679220-3679265                              | NM_025701:2766     | Trappe5    | INSIDE                 | 0.176                                                        | 14.925                         | 2141.88            | 31968.12           | 2.623                          | 1818.66            | 4771.21            |
| A_68_P30328130  | chr15:72888613-72888657                           | NM_029640:-2392    | Trappe9    | PROMOTER               | 0.308                                                        | 5.144                          | 985.80             | 5070.76            | 1.586                          | 809.44             | 1284.17            |
| A_68_P27466129  | chr10:114238135-114238179                         | NM_146241:270      | Trhde      | INSIDE                 | 0.37                                                         | 4.510                          | 882.51             | 3980.43            | 1.669                          | 792.33             | 1322.38            |
| A_68_P30255510  | chr15:59479785-59479829                           | NM_144549:-402     | Trib1      | PROMOTER               | 0.42                                                         | 4.719                          | 1562.35            | 7372.48            | 1.984                          | 1432.83            | 2842.82            |
| A_68_P30255506  | chr15:59479250-59479294                           | NM_144549:-936     | Trib1      | PROMOTER               | 0.477                                                        | 14.703                         | 7431.83            | 109272.00          | 7.019                          | 7428.50            | 52140.49           |
| A_68_P30255512  | chr15:59479961-59480005                           | NM_144549:-226     | Trib1      | PROMOTER               | 0.531                                                        | 3.128                          | 3052.36            | 9546.55            | 1.66                           | 2531.62            | 4202.71            |
| A_68_P28261138  | chr12:15822842-15822886                           | NM_144551:727      | Trib2      | INSIDE                 | 0.186                                                        | 12.707                         | 839.03             | 10661.90           | 2.359                          | 763.57             | 1801.40            |
| A_68_P24459338  | chr6:53768811-53768855                            | NM_025817:1987     | Tril       | INSIDE                 | 0.236                                                        | 19.721                         | 3198.56            | 63077.89           | 4.653                          | 3682.30            | 17135.05           |
| A_68_P24459356  | chr6:53770927-53770974                            | NM_025817:-131     | Tril       | PROMOTER               | 0.606                                                        | 0.706                          | 1367.82            | 965.32             | 0.428                          | 962.63             | 411.91             |
| A_68_P27833865  | chr11:58791958-58792002                           | NM_053168:363      | Trim11     | INSIDE                 | 0.479                                                        | 6.198                          | 2819.36            | 17474.02           | 2.966                          | 2198.80            | 6522.71            |
| A_68_P27833862  | chr11:58791684-58791728                           | NM_053168:89       | Trim11     | INSIDE                 | 0.666                                                        | 0.667                          | 1598.81            | 1066.08            | 0.444                          | 1188.21            | 527.71             |
| A_68_P29650879  | chr14:62218392-62218436                           | NM_023233:66       | Trim13     | INSIDE                 | 0.4                                                          | 1.367                          | 3835.86            | 5244.48            | 0.546                          | 3126.68            | 1708.71            |

| ProbeName      | Target position of probe on CpG island microarray | TargetID            | GeneSymbol | CpG island Description | Ratio of relative methylation (TiO <sub>2</sub> -NP/Vehicle) | Sham group                     |                    |                    | TiO <sub>2</sub> -H group      |                    |                    |
|----------------|---------------------------------------------------|---------------------|------------|------------------------|--------------------------------------------------------------|--------------------------------|--------------------|--------------------|--------------------------------|--------------------|--------------------|
|                |                                                   |                     |            |                        |                                                              | Relative methylation (Cy5/Cy3) | Cy3 signal (Input) | Cy5 signal (MeDIP) | Relative methylation (Cy5/Cy3) | Cy3 signal (Input) | Cy5 signal (MeDIP) |
| A_68_P22889131 | chr4:46520297-46520341                            | NM_029077:28698     | Trim14     | INSIDE                 | 0.294                                                        | 7.422                          | 1371.02            | 10176.38           | 2.179                          | 1068.84            | 2329.35            |
| A_68_P22889129 | chr4:46520101-46520145                            | NM_029077:28894     | Trim14     | INSIDE                 | 0.553                                                        | 4.782                          | 1212.32            | 5796.77            | 2.646                          | 993.21             | 2628.48            |
| A_68_P22289430 | chr3:83995003-83995047                            | NM_030706:29775     | Trim2      | INSIDE                 | 0.486                                                        | 0.711                          | 1690.55            | 1202.64            | 0.346                          | 1290.21            | 446.50             |
| A_68_P31165740 | chr17:36973820-36973864                           | NM_001025599:-243   | Trim26     | PROMOTER               | 0.568                                                        | 0.164                          | 2937.31            | 480.36             | 0.093                          | 1853.77            | 172.06             |
| A_68_P28871505 | chr13:21272743-21272787                           | NM_009054:937       | Trim27     | INSIDE                 | 0.451                                                        | 8.154                          | 1589.09            | 12957.55           | 3.678                          | 1485.18            | 5462.04            |
| A_68_P28871497 | chr13:21271956-21272000                           | NM_009054:151       | Trim27     | INSIDE                 | 0.53                                                         | 3.399                          | 847.80             | 2881.60            | 1.801                          | 760.63             | 1370.13            |
| A_68_P22982499 | chr4:65266160-65266204                            | NM_001161782:163    | Trim32     | INSIDE                 | 0.602                                                        | 0.610                          | 10896.95           | 6648.01            | 0.367                          | 6969.68            | 2560.81            |
| A_68_P22982500 | chr4:65266278-65266324                            | NM_001161782:281    | Trim32     | INSIDE                 | 0.281                                                        | 5.837                          | 5587.75            | 32618.48           | 1.642                          | 3908.81            | 6417.89            |
| A_68_P22385231 | chr3:103083438-103083482                          | NM_001079830:245    | Trim33     | INSIDE                 | 0.637                                                        | 0.599                          | 1304.98            | 782.08             | 0.382                          | 982.78             | 375.33             |
| A_68_P31675573 | chr18:46358367-46358411                           | NM_001170855:84     | Trim36     | INSIDE                 | 0.309                                                        | 7.480                          | 1377.02            | 10299.86           | 2.314                          | 1133.78            | 2623.97            |
| A_68_P27992700 | chr11:86940726-86940770                           | NM_197987:170       | Trim37     | INSIDE                 | 0.446                                                        | 7.723                          | 311.70             | 2407.35            | 3.444                          | 280.60             | 966.38             |
| A_68_P27992698 | chr11:86940439-86940483                           | NM_197987:-118      | Trim37     | PROMOTER               | 0.45                                                         | 0.610                          | 1929.14            | 1177.30            | 0.274                          | 1678.48            | 460.65             |
| A_68_P26752043 | chr9:97266499-97266543                            | NM_030219:3857      | Trim42     | INSIDE                 | 0.423                                                        | 5.152                          | 1754.21            | 9038.35            | 2.179                          | 1123.69            | 2448.20            |
| A_68_P21476827 | chr2:102241389-102241433                          | NM_020267:-353      | Trim44     | PROMOTER               | 0.623                                                        | 0.418                          | 1848.56            | 772.14             | 0.26                           | 1437.23            | 374.26             |
| A_68_P22218905 | chr3:68848719-68848763                            | NM_025863:-76       | Trim59     | PROMOTER               | 0.399                                                        | 8.875                          | 976.85             | 8669.19            | 3.544                          | 903.02             | 3199.91            |
| A_68_P23293634 | chr4:128561007-128561051                          | NM_178110:-355      | Trim62     | PROMOTER               | 0.388                                                        | 1.822                          | 2801.07            | 5102.29            | 0.707                          | 2122.11            | 1500.28            |
| A_68_P26247734 | chr8:127317918-127317962                          | NM_198632:1022      | Trim67     | INSIDE                 | 0.178                                                        | 27.423                         | 4225.45            | 115875.00          | 4.875                          | 3664.56            | 17864.27           |
| A_68_P26247724 | chr8:127316847-127316891                          | NM_198632:-50       | Trim67     | PROMOTER               | 0.662                                                        | 0.274                          | 3558.78            | 973.90             | 0.181                          | 2494.90            | 451.88             |
| A_68_P27780217 | chr11:48651539-48651583                           | NM_053166:11921     | Trim7      | INSIDE                 | 0.347                                                        | 1.469                          | 2034.11            | 2987.75            | 0.509                          | 1821.65            | 927.17             |
| A_68_P26845370 | chr9:114471876-114471920                          | NM_001042503:1589   | Trim71     | INSIDE                 | 0.396                                                        | 5.137                          | 1100.73            | 5654.24            | 2.034                          | 881.67             | 1793.47            |
| A_68_P25508612 | chr7:135153559-135153603                          | NM_001079932:5689   | Trim72     | INSIDE                 | 0.552                                                        | 5.536                          | 6317.78            | 34972.87           | 3.053                          | 4731.10            | 14445.62           |
| A_68_P25508611 | chr7:135153487-135153531                          | NM_001079932:5617   | Trim72     | INSIDE                 | 0.604                                                        | 3.628                          | 1654.02            | 6000.29            | 2.19                           | 1148.93            | 2516.34            |
| A_68_P25508613 | chr7:135153669-135153713                          | NM_001079932:5799   | Trim72     | INSIDE                 | 0.485                                                        | 3.258                          | 4638.12            | 15109.16           | 1.578                          | 3555.66            | 5612.53            |
| A_68_P32144304 | chr19:46576472-46576516                           | NM_053100:357       | Trim8      | INSIDE                 | 0.66                                                         | 3.632                          | 886.66             | 3220.62            | 2.398                          | 733.32             | 1758.37            |
| A_68_P32144298 | chr19:46575400-46575444                           | NM_053100:-715      | Trim8      | PROMOTER               | 0.664                                                        | 5.483                          | 1545.33            | 8472.53            | 3.638                          | 1234.78            | 4491.97            |
| A_68_P32144302 | chr19:46576160-46576204                           | NM_053100:45        | Trim8      | INSIDE                 | 0.323                                                        | 16.520                         | 163.10             | 2694.42            | 5.334                          | 141.01             | 752.19             |
| A_68_P28520026 | chr12:71448401-71448445                           | NM_001110202:179    | Trim9      | INSIDE                 | 0.304                                                        | 0.644                          | 925.72             | 595.74             | 0.196                          | 898.54             | 175.82             |
| A_68_P30094308 | chr15:27677507-27677551                           | NM_001081302:278075 | Trio       | INSIDE                 | 0.514                                                        | 4.006                          | 2156.18            | 8636.87            | 2.06                           | 1455.25            | 2998.28            |
| A_68_P30363491 | chr15:78798091-78798135                           | NM_001039155:19959  | Triobp     | INSIDE                 | 0.201                                                        | 8.567                          | 3060.74            | 26220.30           | 1.72                           | 2289.66            | 3938.74            |
| A_68_P30363492 | chr15:78798174-78798218                           | NM_001039155:20043  | Triobp     | INSIDE                 | 0.413                                                        | 9.290                          | 2430.05            | 22575.18           | 3.836                          | 1791.15            | 6871.01            |
| A_68_P30363494 | chr15:78798409-78798453                           | NM_001039155:20277  | Triobp     | INSIDE                 | 0.464                                                        | 4.656                          | 4441.63            | 20678.56           | 2.159                          | 3364.77            | 7262.97            |
| A_68_P30363493 | chr15:78798329-78798373                           | NM_001039155:20197  | Triobp     | INSIDE                 | 0.494                                                        | 31.544                         | 1054.42            | 33260.79           | 15.571                         | 488.06             | 7599.52            |
| A_68_P30363604 | chr15:78813243-78813287                           | NM_001024716:-221   | Triobp     | PROMOTER               | 0.62                                                         | 0.617                          | 3301.33            | 2038.24            | 0.383                          | 2551.90            | 977.32             |
| A_68_P30363681 | chr15:78823328-78823373                           | NM_001024716:9865   | Triobp     | INSIDE                 | 0.608                                                        | 2.765                          | 1262.82            | 3491.42            | 1.681                          | 879.07             | 1477.70            |
| A_68_P28688419 | chr12:103150855-103150899                         | NM_028446:505       | Trip11     | INSIDE                 | 0.188                                                        | 18.335                         | 5879.80            | 107806.90          | 3.441                          | 6105.52            | 21011.29           |
| A_68_P20405967 | chr1:84835781-84835825                            | NM_133975:77        | Trip12     | INSIDE                 | 0.426                                                        | 0.464                          | 2212.25            | 1027.11            | 0.198                          | 1691.06            | 334.56             |
| A_68_P20405963 | chr1:84835382-84835426                            | NM_133975:475       | Trip12     | INSIDE                 | 0.578                                                        | 0.685                          | 1522.52            | 1043.35            | 0.396                          | 1213.41            | 480.33             |
| A_68_P20405961 | chr1:84835228-84835272                            | NM_133975:629       | Trip12     | INSIDE                 | 0.193                                                        | 1.336                          | 5341.29            | 7135.66            | 0.258                          | 3648.02            | 940.37             |
| A_68_P20405960 | chr1:84835061-84835105                            | NM_133975:797       | Trip12     | INSIDE                 | 0.41                                                         | 3.666                          | 1235.96            | 4531.30            | 1.502                          | 1053.12            | 1582.02            |
| A_68_P29143148 | chr13:74074758-74074802                           | NM_027182:435       | Trip13     | INSIDE                 | 0.582                                                        | 0.524                          | 6983.73            | 3661.09            | 0.305                          | 4529.14            | 1381.18            |
| A_68_P29143149 | chr13:74074834-74074878                           | NM_027182:359       | Trip13     | INSIDE                 | 0.659                                                        | 0.273                          | 4240.45            | 1158.11            | 0.18                           | 2977.08            | 535.97             |
| A_68_P30578596 | chr16:18249157-18249201                           | NM_001080999:203    | Tmt2a      | INSIDE                 | 0.489                                                        | 0.685                          | 1915.85            | 1311.78            | 0.335                          | 1317.31            | 441.46             |
| A_68_P23317940 | chr4:133054507-133054551                          | NM_001081156:-63    | Tmp1       | PROMOTER               | 0.502                                                        | 0.157                          | 3016.53            | 473.14             | 0.079                          | 2228.61            | 175.58             |
| A_68_P24725198 | chr6:106719039-106719083                          | NM_027296:-105      | Tmt1       | PROMOTER               | 0.445                                                        | 10.964                         | 1343.93            | 14734.38           | 4.879                          | 1229.38            | 5998.37            |
| A_68_P21433080 | chr2:93028458-93028502                            | NM_001025246:740    | Trp53il1   | INSIDE                 | 0.485                                                        | 0.300                          | 1498.58            | 450.25             | 0.146                          | 1206.42            | 175.85             |
| A_68_P22728294 | chr4:11083669-11083713                            | NM_001199105:103    | Trp53inp1  | INSIDE                 | 0.578                                                        | 0.402                          | 2031.76            | 817.47             | 0.233                          | 1773.46            | 412.41             |

| ProbeName      | Target position of probe on CpG island microarray | TargetID           | GeneSymbol | CpG island Description | Ratio of relative methylation (TiO <sub>2</sub> -NP/Vehicle) | Sham group                     |                    |                    | TiO <sub>2</sub> -H group      |                    |                    |
|----------------|---------------------------------------------------|--------------------|------------|------------------------|--------------------------------------------------------------|--------------------------------|--------------------|--------------------|--------------------------------|--------------------|--------------------|
|                |                                                   |                    |            |                        |                                                              | Relative methylation (Cy5/Cy3) | Cy3 signal (Input) | Cy5 signal (MeDIP) | Relative methylation (Cy5/Cy3) | Cy3 signal (Input) | Cy5 signal (MeDIP) |
| A_68_P21765248 | chr2:155207645-155207689                          | NM_178111:75       | Trp53inp2  | INSIDE                 | 0.359                                                        | 6.062                          | 513.07             | 3110.36            | 2.177                          | 495.56             | 1078.96            |
| A_68_P21765289 | chr2:155212485-155212529                          | NM_178111:4915     | Trp53inp2  | INSIDE                 | 0.339                                                        | 1.910                          | 3004.53            | 5737.90            | 0.647                          | 2156.84            | 1394.83            |
| A_68_P23428914 | chr4:153455643-153455687                          | NM_001126330:15618 | Trp73      | INSIDE                 | 0.499                                                        | 0.216                          | 2436.95            | 527.53             | 0.108                          | 1620.54            | 174.91             |
| A_68_P23428913 | chr4:153455504-153455548                          | NM_001126330:15756 | Trp73      | INSIDE                 | 0.581                                                        | 0.267                          | 2598.01            | 694.51             | 0.155                          | 1756.36            | 272.84             |
| A_68_P21767078 | chr2:155518080-155518124                          | NM_001163452:18    | Trpc4ap    | INSIDE                 | 0.462                                                        | 8.259                          | 894.44             | 7387.28            | 3.82                           | 713.20             | 2724.25            |
| A_68_P21767075 | chr2:155517577-155517621                          | NM_001163452:522   | Trpc4ap    | INSIDE                 | 0.622                                                        | 0.097                          | 4922.71            | 475.10             | 0.06                           | 3575.68            | 214.62             |
| A_68_P26292118 | chr9:8544562-8544606                              | NM_013838:443      | Trpc6      | INSIDE                 | 0.397                                                        | 12.204                         | 846.87             | 10334.97           | 4.849                          | 723.75             | 3509.22            |
| A_68_P32010020 | chr19:22213374-22213418                           | NM_001035239:-210  | Trpm3      | PROMOTER               | 0.524                                                        | 4.474                          | 1125.60            | 5035.93            | 2.343                          | 1040.25            | 2436.87            |
| A_68_P21610504 | chr2:126701750-126701794                          | NM_001164325:225   | Trpm7      | INSIDE                 | 0.495                                                        | 3.701                          | 1860.61            | 6885.61            | 1.832                          | 1548.09            | 2836.60            |
| A_68_P24162469 | chr5:145529670-145529714                          | NM_001081362:32    | Trrap      | INSIDE                 | 0.417                                                        | 5.753                          | 5281.38            | 30385.58           | 2.401                          | 4356.13            | 10461.21           |
| A_68_P24162463 | chr5:145529030-145529074                          | NM_001081362:-608  | Trrap      | DIVERGENT_PROMOTER     | 0.622                                                        | 4.582                          | 3665.54            | 16795.20           | 2.849                          | 3019.60            | 8603.87            |
| A_68_P21099454 | chr2:29642948-29642997                            | NM_145520:219      | Trub2      | INSIDE                 | 0.37                                                         | 0.549                          | 924.17             | 507.03             | 0.203                          | 862.71             | 175.13             |
| A_68_P21092309 | chr2:28496355-28496399                            | NM_022887:-386     | Tsc1       | PROMOTER               | 0.315                                                        | 0.551                          | 1853.30            | 1021.05            | 0.173                          | 1451.70            | 251.68             |
| A_68_P29733544 | chr14:76814636-76814680                           | NM_207652:-969     | Tsc22d1    | PROMOTER               | 0.169                                                        | 1.930                          | 3386.77            | 6535.55            | 0.326                          | 2314.11            | 754.95             |
| A_68_P29733553 | chr14:76816095-76816139                           | NM_207652:489      | Tsc22d1    | INSIDE                 | 0.289                                                        | 9.553                          | 3456.50            | 33019.08           | 2.764                          | 2825.40            | 7809.91            |
| A_68_P29733542 | chr14:76814361-76814405                           | NM_207652:-1245    | Tsc22d1    | PROMOTER               | 0.482                                                        | 5.868                          | 586.23             | 3440.03            | 2.826                          | 479.84             | 1356.04            |
| A_68_P29733545 | chr14:76814748-76814792                           | NM_207652:-857     | Tsc22d1    | PROMOTER               | 0.587                                                        | 0.621                          | 1598.43            | 992.46             | 0.365                          | 1252.12            | 456.57             |
| A_68_P32700068 | chrX:137134513-137134557                          | NM_001077364:527   | Tsc22d3    | INSIDE                 | 0.449                                                        | 5.130                          | 5944.70            | 30498.89           | 2.303                          | 7180.11            | 16536.71           |
| A_68_P32700067 | chrX:137134400-137134444                          | NM_001077364:639   | Tsc22d3    | INSIDE                 | 0.451                                                        | 6.133                          | 3425.77            | 21009.56           | 2.767                          | 3788.04            | 10481.17           |
| A_68_P32700064 | chrX:137133979-137134023                          | NM_001077364:1061  | Tsc22d3    | INSIDE                 | 0.63                                                         | 3.174                          | 744.94             | 2364.09            | 2                              | 856.32             | 1712.92            |
| A_68_P32700063 | chrX:137133904-137133948                          | NM_001077364:1135  | Tsc22d3    | INSIDE                 | 0.598                                                        | 3.879                          | 316.60             | 1228.20            | 2.322                          | 509.56             | 1183.02            |
| A_68_P24771681 | chr6:115494875-115494919                          | NM_199033:175      | Tsen2      | INSIDE                 | 0.294                                                        | 14.118                         | 1512.89            | 21358.93           | 4.151                          | 2416.80            | 10032.40           |
| A_68_P24946870 | chr7:3646016-3646060                              | NM_024168:-71      | Tsen34     | PROMOTER               | 0.341                                                        | 5.080                          | 3491.47            | 17736.04           | 1.731                          | 2895.41            | 5010.50            |
| A_68_P24946869 | chr7:3645931-3645975                              | NM_024168:-157     | Tsen34     | PROMOTER               | 0.517                                                        | 0.337                          | 1839.91            | 620.44             | 0.174                          | 1508.13            | 262.88             |
| A_68_P25102014 | chr7:54175443-54175487                            | NM_021884:-164     | Tsg101     | PROMOTER               | 0.552                                                        | 3.507                          | 1424.48            | 4994.98            | 1.937                          | 1247.19            | 2415.83            |
| A_68_P25102013 | chr7:54175369-54175413                            | NM_021884:-90      | Tsg101     | PROMOTER               | 0.64                                                         | 2.745                          | 991.35             | 2721.16            | 1.756                          | 866.74             | 1522.17            |
| A_68_P20156310 | chr1:37921470-37921514                            | NM_207228:432      | Tsga10     | INSIDE                 | 0.312                                                        | 1.860                          | 5367.40            | 9985.04            | 0.581                          | 4334.17            | 2518.67            |
| A_68_P20156312 | chr1:37921635-37921679                            | NM_207228:268      | Tsga10     | INSIDE                 | 0.558                                                        | 0.449                          | 2636.43            | 1182.54            | 0.25                           | 2207.76            | 553.01             |
| A_68_P25056449 | chr7:37481732-37481776                            | NM_172298:-1382    | Tshz3      | PROMOTER               | 0.258                                                        | 16.491                         | 6436.68            | 106147.30          | 4.258                          | 5467.08            | 23278.94           |
| A_68_P25355275 | chr7:105509998-105510042                          | NM_001168539:-182  | Tsku       | PROMOTER               | 0.046                                                        | 2.072                          | 3011.61            | 6241.40            | 0.094                          | 1938.74            | 183.00             |
| A_68_P25355276 | chr7:105510079-105510123                          | NM_001168539:-262  | Tsku       | PROMOTER               | 0.047                                                        | 5.549                          | 1709.69            | 9486.98            | 0.261                          | 1318.34            | 343.74             |
| A_68_P25355271 | chr7:105509578-105509622                          | NM_001024619:198   | Tsku       | INSIDE                 | 0.599                                                        | 0.594                          | 1207.63            | 717.15             | 0.356                          | 1019.20            | 362.34             |
| A_68_P20551183 | chr1:120207585-120207629                          | NM_011650:103      | Tsn        | INSIDE                 | 0.645                                                        | 0.612                          | 2139.88            | 1308.59            | 0.394                          | 1646.87            | 649.15             |
| A_68_P26248943 | chr8:127536584-127536628                          | NM_016909:-290     | Tsnax      | PROMOTER               | 0.309                                                        | 0.530                          | 1477.65            | 783.17             | 0.164                          | 1057.41            | 173.46             |
| A_68_P29560590 | chr14:41779806-41779850                           | NM_145928:268      | Tspan14    | INSIDE                 | 0.356                                                        | 10.058                         | 6546.96            | 65849.12           | 3.582                          | 5189.04            | 18586.35           |
| A_68_P29560588 | chr14:41779590-41779634                           | NM_145928:484      | Tspan14    | INSIDE                 | 0.529                                                        | 0.536                          | 2081.48            | 1115.92            | 0.284                          | 1483.94            | 420.74             |
| A_68_P27184871 | chr10:61693322-61693366                           | NM_197996:622      | Tspan15    | INSIDE                 | 0.428                                                        | 0.549                          | 866.09             | 475.83             | 0.235                          | 750.03             | 176.25             |
| A_68_P27184877 | chr10:61693989-61694033                           | NM_197996:-44      | Tspan15    | PROMOTER               | 0.388                                                        | 1.470                          | 2221.02            | 3264.22            | 0.57                           | 1675.81            | 954.55             |
| A_68_P29051405 | chr13:54890823-54890867                           | NM_028841:79       | Tspan17    | INSIDE                 | 0.446                                                        | 9.364                          | 480.73             | 4501.43            | 4.173                          | 390.54             | 1629.55            |
| A_68_P22382656 | chr3:102538778-102538822                          | NM_027533:108      | Tspan2     | INSIDE                 | 0.325                                                        | 10.790                         | 9467.85            | 102159.20          | 3.509                          | 7488.68            | 26280.67           |
| A_68_P22382660 | chr3:102539302-102539346                          | NM_027533:632      | Tspan2     | INSIDE                 | 0.628                                                        | 0.559                          | 2367.81            | 1322.52            | 0.351                          | 1838.22            | 644.70             |
| A_68_P22570418 | chr3:138405498-138405542                          | NM_019571:362      | Tspan5     | INSIDE                 | 0.337                                                        | 11.691                         | 1502.74            | 17568.13           | 3.939                          | 1409.44            | 5551.75            |
| A_68_P24836602 | chr6:127984334-127984378                          | NM_175414:109240   | Tspan9     | INSIDE                 | 0.587                                                        | 3.260                          | 1211.24            | 3949.13            | 1.913                          | 1006.07            | 1924.58            |
| A_68_P32749012 | chrX:148777026-148777070                          | NM_029836:-21      | Tspyl2     | PROMOTER               | 0.193                                                        | 30.468                         | 16973.12           | 517138.50          | 5.878                          | 22304.88           | 131113.10          |
| A_68_P21753655 | chr2:153050987-153051031                          | NM_198617:169      | Tspyl3     | INSIDE                 | 0.457                                                        | 0.609                          | 1495.88            | 910.46             | 0.278                          | 1055.58            | 293.52             |
| A_68_P30125732 | chr15:33617536-33617580                           | NM_001085421:80    | Tspyl5     | INSIDE                 | 0.589                                                        | 0.574                          | 942.93             | 541.55             | 0.338                          | 741.94             | 250.99             |

| ProbeName      | Target position of probe on CpG island microarray | TargetID           | GeneSymbol | CpG island Description | Ratio of relative methylation (TiO <sub>2</sub> -NP/Vehicle) | Sham group                     |                    |                    | TiO <sub>2</sub> -H group      |                    |                    |
|----------------|---------------------------------------------------|--------------------|------------|------------------------|--------------------------------------------------------------|--------------------------------|--------------------|--------------------|--------------------------------|--------------------|--------------------|
|                |                                                   |                    |            |                        |                                                              | Relative methylation (Cy5/Cy3) | Cy3 signal (Input) | Cy5 signal (MeDIP) | Relative methylation (Cy5/Cy3) | Cy3 signal (Input) | Cy5 signal (MeDIP) |
| A_68_P25598465 | chr7:150255389-150255433                          | NM_001115085:138   | Tssc4      | INSIDE                 | 0.471                                                        | 0.208                          | 3250.53            | 675.38             | 0.098                          | 2256.73            | 220.74             |
| A_68_P25598469 | chr7:150255890-150255934                          | NM_001115085:640   | Tssc4      | INSIDE                 | 0.588                                                        | 0.599                          | 5213.06            | 3124.57            | 0.352                          | 3258.66            | 1147.64            |
| A_68_P25948613 | chr8:72426109-72426153                            | NM_032004:17       | Tssk6      | INSIDE                 | 0.524                                                        | 0.459                          | 3428.13            | 1572.94            | 0.24                           | 2391.65            | 574.97             |
| A_68_P30345040 | chr15:75760067-75760111                           | NM_031201:72       | Tsta3      | INSIDE                 | 0.496                                                        | 0.591                          | 5896.80            | 3482.19            | 0.293                          | 4244.46            | 1242.73            |
| A_68_P31206907 | chr17:46581950-46581994                           | NM_001162864:42652 | Ttbk1      | INSIDE                 | 0.234                                                        | 1.725                          | 4372.47            | 7540.54            | 0.404                          | 3040.88            | 1228.71            |
| A_68_P31206981 | chr17:46592555-46592609                           | NM_001162864:32042 | Ttbk1      | INSIDE                 | 0.144                                                        | 1.606                          | 2997.41            | 4815.00            | 0.231                          | 1882.94            | 434.33             |
| A_68_P31206908 | chr17:46582089-46582133                           | NM_001162864:42514 | Ttbk1      | INSIDE                 | 0.173                                                        | 4.256                          | 9357.05            | 39827.77           | 0.736                          | 6778.45            | 4992.25            |
| A_68_P27752129 | chr11:43561327-43561371                           | NM_133795:127      | Ttc1       | INSIDE                 | 0.326                                                        | 0.432                          | 1486.55            | 642.85             | 0.141                          | 1233.18            | 173.70             |
| A_68_P28314928 | chr12:29435138-29435182                           | NM_001161410:99    | Ttc15      | INSIDE                 | 0.663                                                        | 0.626                          | 1705.92            | 1068.68            | 0.415                          | 1404.47            | 582.95             |
| A_68_P21291249 | chr2:66094636-66094680                            | NM_001047604:16    | Ttc21b     | INSIDE                 | 0.539                                                        | 0.647                          | 1123.30            | 726.52             | 0.349                          | 857.28             | 299.11             |
| A_68_P23982396 | chr5:111309011-111309055                          | NM_024477:211      | Ttc28      | INSIDE                 | 0.112                                                        | 38.572                         | 4600.44            | 177447.30          | 4.338                          | 4497.50            | 19509.57           |
| A_68_P29982442 | chr15:5135931-5135975                             | NM_026213:393      | Ttc33      | INSIDE                 | 0.424                                                        | 0.251                          | 2225.11            | 557.63             | 0.106                          | 1668.54            | 177.34             |
| A_68_P30176278 | chr15:43309169-43309213                           | NM_025736:416      | Ttc35      | INSIDE                 | 0.421                                                        | 25.836                         | 2135.91            | 55182.54           | 10.872                         | 2587.27            | 28129.36           |
| A_68_P30176273 | chr15:43308698-43308742                           | NM_025736:-54      | Ttc35      | PROMOTER               | 0.534                                                        | 4.062                          | 1739.51            | 7065.81            | 2.167                          | 1442.43            | 3126.40            |
| A_68_P31501880 | chr18:12802925-12802969                           | NM_028341:905      | Ttc39c     | INSIDE                 | 0.612                                                        | 3.461                          | 2371.03            | 8206.25            | 2.118                          | 1765.30            | 3739.09            |
| A_68_P31422209 | chr17:87682307-87682351                           | NM_028639:103      | Ttc7       | INSIDE                 | 0.33                                                         | 9.975                          | 661.31             | 6596.70            | 3.295                          | 640.24             | 2109.31            |
| A_68_P26685864 | chr9:83728415-83728459                            | NM_001110265:141   | Ttk        | INSIDE                 | 0.536                                                        | 2.741                          | 4201.15            | 11513.40           | 1.47                           | 3321.28            | 4882.37            |
| A_68_P21622816 | chr2:128891587-128891631                          | NM_027192:-74      | Ttl        | PROMOTER               | 0.417                                                        | 9.612                          | 2427.05            | 23329.29           | 4.006                          | 1926.42            | 7717.62            |
| A_68_P30388745 | chr15:83319976-83320026                           | NM_178869:21337    | Ttl1       | INSIDE                 | 0.644                                                        | 2.992                          | 969.10             | 2899.88            | 1.928                          | 713.86             | 1376.17            |
| A_68_P23441977 | chr4:155409010-155409054                          | NM_029264:15894    | Ttl10      | INSIDE                 | 0.666                                                        | 0.408                          | 1128.86            | 460.92             | 0.272                          | 932.70             | 253.65             |
| A_68_P20349748 | chr1:74708251-74708295                            | NM_001014974:-55   | Ttl4       | PROMOTER               | 0.215                                                        | 9.283                          | 1550.04            | 14389.51           | 1.999                          | 1370.92            | 2739.81            |
| A_68_P20349750 | chr1:74708445-74708489                            | NM_001014974:139   | Ttl4       | INSIDE                 | 0.573                                                        | 0.292                          | 2247.13            | 655.21             | 0.167                          | 1702.79            | 284.36             |
| A_68_P30422255 | chr15:88785176-88785220                           | NM_172818:-350     | Ttl8       | PROMOTER               | 0.488                                                        | 6.204                          | 1398.23            | 8674.98            | 3.03                           | 1365.34            | 4136.81            |
| A_68_P30422253 | chr15:88784916-88784960                           | NM_172818:-90      | Ttl8       | PROMOTER               | 0.303                                                        | 1.940                          | 4277.78            | 8300.67            | 0.588                          | 3257.18            | 1916.56            |
| A_68_P21813371 | chr2:163428304-163428348                          | NM_029512:277      | Ttpal      | INSIDE                 | 0.272                                                        | 0.342                          | 2445.99            | 836.27             | 0.093                          | 1860.25            | 173.25             |
| A_68_P20352745 | chr1:75216487-75216531                            | NM_009447:-680     | Tuba4a     | PROMOTER               | 0.488                                                        | 0.190                          | 2677.13            | 507.46             | 0.093                          | 1906.83            | 176.49             |
| A_68_P20352744 | chr1:75216331-75216375                            | NM_009447:-524     | Tuba4a     | PROMOTER               | 0.513                                                        | 0.470                          | 1002.88            | 471.65             | 0.241                          | 768.24             | 185.35             |
| A_68_P21875504 | chr2:174282882-174282926                          | NM_001080971:6709  | Tubb1      | INSIDE                 | 0.478                                                        | 5.031                          | 1558.76            | 7841.86            | 2.406                          | 1026.48            | 2469.78            |
| A_68_P28936501 | chr13:34169775-34169819                           | NM_009450:81       | Tubb2a     | INSIDE                 | 0.475                                                        | 0.339                          | 1833.43            | 621.40             | 0.161                          | 1293.09            | 208.13             |
| A_68_P21070656 | chr2:25080752-25080796                            | NM_146116:-552     | Tubb2c     | PROMOTER               | 0.34                                                         | 13.933                         | 2674.67            | 37265.21           | 4.738                          | 2101.61            | 9958.46            |
| A_68_P21070644 | chr2:25079420-25079464                            | NM_146116:780      | Tubb2c     | INSIDE                 | 0.406                                                        | 8.083                          | 2216.47            | 17915.21           | 3.284                          | 1693.63            | 5562.06            |
| A_68_P21070645 | chr2:25079554-25079599                            | NM_146116:646      | Tubb2c     | INSIDE                 | 0.479                                                        | 0.395                          | 1231.34            | 486.71             | 0.189                          | 948.99             | 179.72             |
| A_68_P21070648 | chr2:25079927-25079971                            | NM_146116:274      | Tubb2c     | INSIDE                 | 0.527                                                        | 0.240                          | 2957.25            | 709.72             | 0.126                          | 2137.98            | 270.26             |
| A_68_P31161191 | chr17:35974038-35974082                           | NM_011655:1186     | Tubb5      | INSIDE                 | 0.664                                                        | 3.365                          | 892.95             | 3004.75            | 2.235                          | 786.75             | 1758.55            |
| A_68_P31791603 | chr18:67550248-67550292                           | NM_026473:-114     | Tubb6      | PROMOTER               | 0.321                                                        | 7.013                          | 1680.77            | 11786.62           | 2.252                          | 1244.25            | 2802.68            |
| A_68_P31791666 | chr18:67561362-67561406                           | NM_026473:11000    | Tubb6      | INSIDE                 | 0.529                                                        | 2.644                          | 3309.81            | 8752.45            | 1.398                          | 2174.39            | 3040.34            |
| A_68_P25663081 | chr8:12672535-12672579                            | NM_198031:-456     | Tubgcp3    | PROMOTER               | 0.505                                                        | 6.466                          | 2552.56            | 16503.67           | 3.262                          | 2284.20            | 7451.73            |
| A_68_P30423271 | chr15:88953473-88953517                           | NM_001163319:86    | Tubgcp6    | INSIDE                 | 0.043                                                        | 4.196                          | 3973.70            | 16672.95           | 0.182                          | 2516.49            | 458.60             |
| A_68_P31122079 | chr17:28501420-28501464                           | NM_021478:646      | Tulp1      | INSIDE                 | 0.43                                                         | 0.548                          | 858.81             | 470.82             | 0.236                          | 730.02             | 171.94             |
| A_68_P24838525 | chr6:128306097-128306141                          | NM_011657:-249     | Tulp3      | PROMOTER               | 0.556                                                        | 3.361                          | 2550.00            | 8571.74            | 1.868                          | 2181.20            | 4073.43            |
| A_68_P24838521 | chr6:128305667-128305711                          | NM_011657:181      | Tulp3      | INSIDE                 | 0.652                                                        | 0.168                          | 7292.48            | 1226.23            | 0.11                           | 4936.87            | 541.12             |
| A_68_P23111973 | chr4:93001689-93001733                            | NM_026954:492      | Tusc1      | INSIDE                 | 0.61                                                         | 3.404                          | 601.08             | 2045.96            | 2.077                          | 510.03             | 1059.51            |
| A_68_P25798746 | chr8:40068990-40069034                            | NM_030254:92       | Tusc3      | INSIDE                 | 0.472                                                        | 6.510                          | 1202.48            | 7828.14            | 3.07                           | 951.06             | 2919.66            |
| A_68_P30453204 | chr15:94420006-94420050                           | NM_008971:227      | Twfl       | INSIDE                 | 0.636                                                        | 3.677                          | 2299.31            | 8454.98            | 2.338                          | 2057.03            | 4809.61            |
| A_68_P28344357 | chr12:34643155-34643199                           | NM_011658:641      | Twist1     | INSIDE                 | 0.296                                                        | 0.299                          | 2558.09            | 765.96             | 0.089                          | 1984.73            | 175.87             |
| A_68_P28344355 | chr12:34642855-34642899                           | NM_011658:341      | Twist1     | INSIDE                 | 0.657                                                        | 3.850                          | 702.80             | 2705.68            | 2.531                          | 605.39             | 1532.02            |

| ProbeName      | Target position of probe on CpG island microarray | TargetID          | GeneSymbol | CpG island Description | Ratio of relative methylation (TiO <sub>2</sub> -NP/Vehicle) | Sham group                     |                    |                    | TiO <sub>2</sub> -H group      |                    |                    |
|----------------|---------------------------------------------------|-------------------|------------|------------------------|--------------------------------------------------------------|--------------------------------|--------------------|--------------------|--------------------------------|--------------------|--------------------|
|                |                                                   |                   |            |                        |                                                              | Relative methylation (Cy5/Cy3) | Cy3 signal (Input) | Cy5 signal (MeDIP) | Relative methylation (Cy5/Cy3) | Cy3 signal (Input) | Cy5 signal (MeDIP) |
| A_68_P20444766 | chr1:93698474-93698518                            | NM_007855:443     | Twist2     | INSIDE                 | 0.452                                                        | 4.733                          | 2410.29            | 11408.30           | 2.141                          | 1842.76            | 3944.96            |
| A_68_P23297754 | chr4:129318346-129318390                          | NM_001199695:-59  | Txlna      | PROMOTER               | 0.626                                                        | 3.668                          | 1785.51            | 6549.05            | 2.297                          | 1285.76            | 2953.12            |
| A_68_P23297751 | chr4:129318057-129318101                          | NM_001005506:-29  | Txlna      | PROMOTER               | 0.317                                                        | 5.088                          | 5807.29            | 29549.93           | 1.615                          | 4077.45            | 6585.41            |
| A_68_P32791134 | chrX:159266854-159266898                          | NM_178935:455     | Txlng      | INSIDE                 | 0.543                                                        | 2.910                          | 4348.46            | 12652.54           | 1.579                          | 5890.97            | 9304.41            |
| A_68_P22948244 | chr4:57969284-57969328                            | NM_011660:-23     | Txn1       | PROMOTER               | 0.492                                                        | 6.029                          | 679.88             | 4099.18            | 2.963                          | 608.21             | 1802.36            |
| A_68_P27910150 | chr11:72020411-72020455                           | NM_026559:-623    | Txndc17    | DIVERGENT_PROMOTER     | 0.555                                                        | 0.457                          | 1213.97            | 555.17             | 0.254                          | 969.72             | 246.20             |
| A_68_P28961200 | chr13:38619778-38619822                           | NM_145367:529     | Txndc5     | INSIDE                 | 0.453                                                        | 6.011                          | 5121.71            | 30786.14           | 2.724                          | 4146.44            | 11295.16           |
| A_68_P31771010 | chr18:63852103-63852147                           | NM_016792:-111    | Txn11      | PROMOTER               | 0.603                                                        | 0.643                          | 1345.04            | 864.35             | 0.387                          | 1238.07            | 479.62             |
| A_68_P31862938 | chr18:80403841-80403885                           | NM_001042408:257  | Txn14a     | INSIDE                 | 0.482                                                        | 0.249                          | 4855.19            | 1208.20            | 0.12                           | 3726.93            | 446.95             |
| A_68_P24629448 | chr6:89594761-89594805                            | NM_001178058:801  | Txnrd3     | INSIDE                 | 0.28                                                         | 2.010                          | 6299.79            | 12663.20           | 0.562                          | 4324.98            | 2430.42            |
| A_68_P24629447 | chr6:89594662-89594706                            | NM_001178058:703  | Txnrd3     | INSIDE                 | 0.242                                                        | 1.598                          | 12733.49           | 20342.89           | 0.386                          | 8128.02            | 3141.29            |
| A_68_P26345607 | chr9:20936048-20936095                            | NM_001205312:-352 | Tyk2       | PROMOTER               | 0.597                                                        | 2.947                          | 630.66             | 1858.86            | 1.76                           | 554.07             | 975.26             |
| A_68_P23570613 | chr5:30400253-30400312                            | NM_021288:-117    | Tyms       | PROMOTER               | 0.354                                                        | 8.293                          | 163.62             | 1356.92            | 2.937                          | 196.53             | 577.16             |
| A_68_P21571594 | chr2:119625143-119625187                          | NM_019392:-85     | Tyro3      | PROMOTER               | 0.297                                                        | 28.500                         | 3915.12            | 111582.60          | 8.451                          | 3211.22            | 27138.52           |
| A_68_P27181843 | chr10:61158699-61158743                           | NM_027912:459     | Tysnd1     | INSIDE                 | 0.521                                                        | 6.670                          | 764.65             | 5100.16            | 3.478                          | 858.82             | 2987.15            |
| A_68_P27181846 | chr10:61159115-61159159                           | NM_027912:875     | Tysnd1     | INSIDE                 | 0.584                                                        | 3.473                          | 1123.98            | 3903.99            | 2.029                          | 969.38             | 1967.14            |
| A_68_P31962487 | chr19:12869271-12869315                           | NR_024093:1321    | U05342     | INSIDE                 | 0.422                                                        | 6.383                          | 2425.49            | 15482.06           | 2.696                          | 2044.23            | 5511.60            |
| A_68_P31962490 | chr19:12869772-12869816                           | NR_024093:819     | U05342     | INSIDE                 | 0.524                                                        | 4.672                          | 1009.15            | 4715.07            | 2.45                           | 914.61             | 2240.79            |
| A_68_P31962486 | chr19:12869204-12869248                           | NR_024093:1387    | U05342     | INSIDE                 | 0.625                                                        | 0.377                          | 2199.47            | 829.46             | 0.236                          | 1807.16            | 425.79             |
| A_68_P24951871 | chr7:5013926-5013970                              | NM_001205231:204  | U2af2      | INSIDE                 | 0.205                                                        | 2.615                          | 5596.70            | 14634.09           | 0.536                          | 3711.59            | 1988.35            |
| A_68_P24951860 | chr7:5012759-5012803                              | NM_001205231:-964 | U2af2      | PROMOTER               | 0.358                                                        | 0.318                          | 2136.64            | 678.94             | 0.114                          | 1510.70            | 171.87             |
| A_68_P24951873 | chr7:5014151-5014195                              | NM_001205231:428  | U2af2      | INSIDE                 | 0.429                                                        | 8.495                          | 2056.68            | 17471.74           | 3.645                          | 1830.75            | 6673.51            |
| A_68_P26560916 | chr9:60642500-60642544                            | NM_028283:168     | Uaca       | INSIDE                 | 0.638                                                        | 0.621                          | 1034.48            | 641.98             | 0.396                          | 808.81             | 320.42             |
| A_68_P20820922 | chr1:172105070-172105114                          | NM_133806:-15     | Uap1       | PROMOTER               | 0.557                                                        | 3.982                          | 1542.79            | 6144.12            | 2.218                          | 1283.64            | 2846.65            |
| A_68_P20820920 | chr1:172104780-172104824                          | NM_133806:275     | Uap1       | INSIDE                 | 0.58                                                         | 0.668                          | 1465.71            | 978.62             | 0.387                          | 1278.34            | 495.04             |
| A_68_P24671729 | chr6:97155626-97155670                            | NM_001111106:-12  | Uba3       | DIVERGENT_PROMOTER     | 0.439                                                        | 9.842                          | 7120.08            | 70073.38           | 4.32                           | 5403.44            | 23342.03           |
| A_68_P21075771 | chr2:25877080-25877124                            | NM_133835:178     | Uba1       | INSIDE                 | 0.375                                                        | 8.585                          | 800.14             | 6869.01            | 3.222                          | 718.20             | 2314.12            |
| A_68_P29958338 | chr14:122278102-122278146                         | NM_026861:297     | Uba2       | INSIDE                 | 0.307                                                        | 14.251                         | 2618.41            | 37315.27           | 4.371                          | 2126.74            | 9295.05            |
| A_68_P29958337 | chr14:122277966-122278010                         | NM_026861:161     | Uba2       | INSIDE                 | 0.475                                                        | 4.528                          | 1122.24            | 5081.21            | 2.149                          | 1097.75            | 2358.77            |
| A_68_P29958335 | chr14:122277673-122277717                         | NM_026861:-133    | Uba2       | PROMOTER               | 0.487                                                        | 3.474                          | 1599.41            | 5556.43            | 1.692                          | 1326.49            | 2244.90            |
| A_68_P22861754 | chr4:41296077-41296121                            | NM_023305:70      | Uba1       | INSIDE                 | 0.181                                                        | 1.822                          | 8995.94            | 16387.40           | 0.329                          | 6236.55            | 2054.03            |
| A_68_P22861756 | chr4:41296379-41296423                            | NM_023305:372     | Uba1       | INSIDE                 | 0.59                                                         | 3.244                          | 2009.90            | 6519.69            | 1.913                          | 1648.19            | 3152.80            |
| A_68_P22861397 | chr4:41222317-41222368                            | NM_026872:-174    | Uba2       | PROMOTER               | 0.486                                                        | 0.619                          | 873.21             | 540.94             | 0.301                          | 582.68             | 175.33             |
| A_68_P22323188 | chr3:89856392-89856436                            | NM_028475:-17     | Uba2l1     | PROMOTER               | 0.579                                                        | 3.150                          | 9771.78            | 30779.79           | 1.823                          | 7195.58            | 13118.35           |
| A_68_P22323185 | chr3:89855913-89855957                            | NM_028475:463     | Uba2l1     | INSIDE                 | 0.641                                                        | 0.473                          | 1217.32            | 576.05             | 0.303                          | 885.71             | 268.60             |
| A_68_P26447525 | chr9:40965613-40965657                            | NM_176860:-57     | Ubash3b    | PROMOTER               | 0.576                                                        | 0.356                          | 1445.72            | 514.41             | 0.205                          | 1250.10            | 256.31             |
| A_68_P26447523 | chr9:40965396-40965440                            | NM_176860:159     | Ubash3b    | INSIDE                 | 0.586                                                        | 2.628                          | 2147.70            | 5644.37            | 1.541                          | 1733.67            | 2671.07            |
| A_68_P27854524 | chr11:62364466-62364510                           | NM_011664:-517    | Ubb        | PROMOTER               | 0.484                                                        | 0.466                          | 4400.41            | 2052.18            | 0.226                          | 3101.27            | 699.88             |
| A_68_P24066623 | chr5:125869716-125869760                          | NM_019639:649     | Ubc        | INSIDE                 | 0.463                                                        | 0.125                          | 6429.18            | 803.62             | 0.058                          | 4337.05            | 251.25             |
| A_68_P24066624 | chr5:125869903-125869947                          | NM_019639:463     | Ubc        | INSIDE                 | 0.648                                                        | 2.561                          | 2217.68            | 5679.07            | 1.659                          | 1820.53            | 3021.04            |
| A_68_P32320545 | chrX:34415031-34415075                            | NM_019668:692     | Ube2a      | INSIDE                 | 0.434                                                        | 7.141                          | 1108.21            | 7914.06            | 3.097                          | 1290.92            | 3997.85            |
| A_68_P32320541 | chrX:34414442-34414486                            | NM_019668:104     | Ube2a      | INSIDE                 | 0.536                                                        | 3.919                          | 815.12             | 3194.34            | 2.101                          | 918.09             | 1928.68            |
| A_68_P21819631 | chr2:164595113-164595157                          | NM_026785:-294    | Ube2c      | PROMOTER               | 0.239                                                        | 6.461                          | 2547.06            | 16457.69           | 1.542                          | 2041.51            | 3147.20            |
| A_68_P27234633 | chr10:70747499-70747543                           | NM_145420:490     | Ube2d1     | INSIDE                 | 0.531                                                        | 0.392                          | 4694.90            | 1841.84            | 0.208                          | 3179.23            | 662.56             |
| A_68_P31619972 | chr18:35930966-35931010                           | NM_019912:-224    | Ube2d2     | PROMOTER               | 0.544                                                        | 0.549                          | 2007.64            | 1102.70            | 0.299                          | 1593.86            | 476.44             |
| A_68_P22552063 | chr3:135102173-135102217                          | NM_025356:472     | Ube2d3     | INSIDE                 | 0.331                                                        | 0.325                          | 2047.70            | 664.75             | 0.108                          | 1598.90            | 171.89             |

| ProbeName      | Target position of probe on CpG island microarray | TargetID          | GeneSymbol | CpG island Description | Ratio of relative methylation (TiO <sub>2</sub> -NP/Vehicle) | Sham group                     |                    |                    | TiO <sub>2</sub> -H group      |                    |                    |
|----------------|---------------------------------------------------|-------------------|------------|------------------------|--------------------------------------------------------------|--------------------------------|--------------------|--------------------|--------------------------------|--------------------|--------------------|
|                |                                                   |                   |            |                        |                                                              | Relative methylation (Cy5/Cy3) | Cy3 signal (Input) | Cy5 signal (MeDIP) | Relative methylation (Cy5/Cy3) | Cy3 signal (Input) | Cy5 signal (MeDIP) |
| A_68_P29440563 | chr14:19726488-19726532                           | NM_144839:-369    | Ube2e2     | PROMOTER               | 0.294                                                        | 0.638                          | 15052.49           | 9608.33            | 0.187                          | 9262.80            | 1735.84            |
| A_68_P21365118 | chr2:78709482-78709526                            | NM_009454:301     | Ube2e3     | INSIDE                 | 0.329                                                        | 8.998                          | 1573.03            | 14153.71           | 2.963                          | 1544.67            | 4576.64            |
| A_68_P27912376 | chr11:72420588-72420632                           | NM_025985:-152    | Ube2g1     | PROMOTER               | 0.475                                                        | 6.359                          | 1096.16            | 6971.01            | 3.021                          | 988.34             | 2986.17            |
| A_68_P23756857 | chr5:65928719-65928763                            | NM_016786:241     | Ube2k      | INSIDE                 | 0.158                                                        | 0.522                          | 9691.95            | 5056.31            | 0.082                          | 6728.44            | 554.46             |
| A_68_P30572505 | chr16:17201070-17201114                           | NM_009456:493     | Ube2l3     | INSIDE                 | 0.493                                                        | 3.191                          | 2306.86            | 7362.04            | 1.572                          | 1851.34            | 2909.86            |
| A_68_P24974292 | chr7:13623438-13623482                            | NM_145578:-133    | Ube2m      | PROMOTER               | 0.502                                                        | 4.314                          | 1077.12            | 4646.18            | 2.163                          | 1007.76            | 2180.10            |
| A_68_P24974288 | chr7:13622741-13622791                            | NM_145578:561     | Ube2m      | INSIDE                 | 0.188                                                        | 3.149                          | 2050.30            | 6456.84            | 0.593                          | 1439.19            | 854.10             |
| A_68_P27365515 | chr10:94978265-94978309                           | NM_080560:491     | Ube2n      | INSIDE                 | 0.299                                                        | 10.331                         | 953.93             | 9854.63            | 3.089                          | 871.40             | 2691.60            |
| A_68_P27365516 | chr10:94978402-94978446                           | NM_080560:629     | Ube2n      | INSIDE                 | 0.426                                                        | 4.884                          | 2045.02            | 9987.90            | 2.083                          | 1734.03            | 3611.76            |
| A_68_P28160203 | chr11:116442887-116442931                         | NM_173755:-147    | Ube2o      | PROMOTER               | 0.486                                                        | 5.666                          | 3606.33            | 20433.94           | 2.753                          | 3018.10            | 8309.29            |
| A_68_P28160202 | chr11:116442703-116442747                         | NM_173755:37      | Ube2o      | INSIDE                 | 0.633                                                        | 2.456                          | 2322.71            | 5705.40            | 1.556                          | 1934.32            | 3009.20            |
| A_68_P22321608 | chr3:89577074-89577118                            | NM_027315:-434    | Ube2q1     | DIVERGENT_PROMOTER     | 0.43                                                         | 4.100                          | 2235.48            | 9164.41            | 1.762                          | 1903.71            | 3353.64            |
| A_68_P26529572 | chr9:54997117-54997161                            | NM_180600:-37     | Ube2q2     | PROMOTER               | 0.201                                                        | 61.848                         | 2238.27            | 138431.50          | 12.426                         | 1991.93            | 24752.62           |
| A_68_P26529571 | chr9:54996925-54996969                            | NM_180600:-229    | Ube2q2     | PROMOTER               | 0.308                                                        | 18.463                         | 996.35             | 18395.37           | 5.686                          | 946.54             | 5382.45            |
| A_68_P29117519 | chr13:69878102-69878146                           | NM_001145162:651  | Ube2q1l    | INSIDE                 | 0.549                                                        | 7.357                          | 4737.78            | 34856.33           | 4.039                          | 3859.43            | 15588.87           |
| A_68_P29117525 | chr13:69878696-69878740                           | NM_001145162:57   | Ube2q1l    | INSIDE                 | 0.587                                                        | 5.203                          | 1462.87            | 7611.13            | 3.056                          | 1231.82            | 3764.24            |
| A_68_P29117514 | chr13:69877429-69877473                           | NM_001145162:1325 | Ube2q1l    | INSIDE                 | 0.45                                                         | 0.613                          | 976.92             | 598.71             | 0.276                          | 793.90             | 219.09             |
| A_68_P24950639 | chr7:4764364-4764408                              | NM_133777:-444    | Ube2s      | PROMOTER               | 0.242                                                        | 0.393                          | 10422.05           | 4095.97            | 0.095                          | 6400.51            | 609.46             |
| A_68_P24950633 | chr7:4763653-4763698                              | NM_133777:267     | Ube2s      | INSIDE                 | 0.569                                                        | 0.445                          | 2336.46            | 1039.89            | 0.253                          | 1636.76            | 414.18             |
| A_68_P21836569 | chr2:167457610-167457654                          | NM_023230:-127    | Ube2v1     | PROMOTER               | 0.493                                                        | 5.897                          | 791.94             | 4670.09            | 2.906                          | 726.28             | 2110.85            |
| A_68_P21836563 | chr2:167456985-167457029                          | NM_023230:499     | Ube2v1     | INSIDE                 | 0.576                                                        | 3.524                          | 1940.80            | 6838.82            | 2.03                           | 1674.02            | 3398.98            |
| A_68_P30566186 | chr16:15594125-15594170                           | NM_001159351:464  | Ube2v2     | INSIDE                 | 0.52                                                         | 0.391                          | 2049.05            | 801.92             | 0.203                          | 1540.80            | 313.41             |
| A_68_P30566189 | chr16:15594510-15594554                           | NM_001159351:79   | Ube2v2     | INSIDE                 | 0.398                                                        | 3.746                          | 2432.86            | 9114.13            | 1.491                          | 1874.12            | 2794.59            |
| A_68_P28042227 | chr11:95926026-95926070                           | NM_172300:630     | Ube2z      | INSIDE                 | 0.493                                                        | 0.787                          | 7188.82            | 3502.89            | 0.24                           | 5618.64            | 1349.39            |
| A_68_P28042228 | chr11:95926131-95926175                           | NM_172300:526     | Ube2z      | INSIDE                 | 0.609                                                        | 0.196                          | 5721.94            | 1121.19            | 0.119                          | 3943.31            | 470.33             |
| A_68_P25158144 | chr7:66483973-66484017                            | NM_173010:-125    | Ube3a      | PROMOTER               | 0.588                                                        | 0.375                          | 2242.56            | 841.24             | 0.221                          | 1783.96            | 393.80             |
| A_68_P24003597 | chr5:114830959-114831004                          | NM_054093:366     | Ube3b      | INSIDE                 | 0.241                                                        | 0.253                          | 4341.07            | 1097.59            | 0.061                          | 2995.62            | 182.44             |
| A_68_P24003598 | chr5:114831037-114831081                          | NM_054093:443     | Ube3b      | INSIDE                 | 0.464                                                        | 0.416                          | 6627.17            | 2757.61            | 0.193                          | 4444.96            | 858.62             |
| A_68_P23568204 | chr5:29895570-29895614                            | NM_133907:-189    | Ube3c      | PROMOTER               | 0.367                                                        | 0.475                          | 1295.66            | 615.72             | 0.175                          | 997.14             | 174.02             |
| A_68_P23400514 | chr4:148800490-148800534                          | NM_022022:228     | Ube4b      | INSIDE                 | 0.617                                                        | 2.289                          | 5177.47            | 11852.33           | 1.412                          | 4073.89            | 5750.92            |
| A_68_P25477108 | chr7:129210764-129210808                          | NM_138589:75      | Ubf1d1     | INSIDE                 | 0.154                                                        | 23.947                         | 1694.42            | 40575.72           | 3.678                          | 1503.20            | 5528.84            |
| A_68_P25477112 | chr7:129211243-129211287                          | NM_138589:553     | Ubf1d1     | INSIDE                 | 0.575                                                        | 9.190                          | 811.48             | 7457.89            | 5.287                          | 746.43             | 3946.61            |
| A_68_P23394412 | chr4:147818678-147818722                          | NM_027873:160     | Ubiad1     | INSIDE                 | 0.579                                                        | 2.784                          | 1527.74            | 4253.54            | 1.611                          | 1183.16            | 1906.59            |
| A_68_P24180071 | chr5:149364369-149364413                          | NM_011908:-26     | Ubl3       | PROMOTER               | 0.506                                                        | 0.610                          | 3898.41            | 2379.51            | 0.309                          | 2736.57            | 844.74             |
| A_68_P32467744 | chrX:71613927-71613971                            | NM_145405:-82     | Ubl4       | PROMOTER               | 0.268                                                        | 11.787                         | 1474.52            | 17380.07           | 3.16                           | 1800.58            | 5689.28            |
| A_68_P24377219 | chr6:38384972-38385016                            | NM_177185:1070    | Ubn2       | INSIDE                 | 0.418                                                        | 0.653                          | 695.58             | 454.20             | 0.273                          | 618.05             | 168.50             |
| A_68_P32753662 | chrX:149932604-149932648                          | NM_018798:-148    | Ubnq1n2    | PROMOTER               | 0.472                                                        | 4.829                          | 353.53             | 1707.34            | 2.28                           | 504.62             | 1150.58            |
| A_68_P31210123 | chr17:47147224-47147268                           | NM_001177374:235  | Ubr2       | INSIDE                 | 0.494                                                        | 5.859                          | 1680.79            | 9847.55            | 2.893                          | 1361.37            | 3938.02            |
| A_68_P21311590 | chr2:69735990-69736034                            | NM_001081548:710  | Ubr3       | INSIDE                 | 0.208                                                        | 1.482                          | 7251.83            | 10748.61           | 0.308                          | 5292.04            | 1631.70            |
| A_68_P23351448 | chr4:138936736-138936780                          | NM_001160319:185  | Ubr4       | INSIDE                 | 0.367                                                        | 0.607                          | 1068.30            | 648.89             | 0.223                          | 997.37             | 222.25             |
| A_68_P28693527 | chr12:103996226-103996270                         | NM_025666:64      | Ubr7       | INSIDE                 | 0.397                                                        | 4.332                          | 2078.40            | 9003.99            | 1.718                          | 1781.22            | 3059.83            |
| A_68_P32118295 | chr19:42056730-42056774                           | NM_145500:500     | Ubrtd1     | INSIDE                 | 0.338                                                        | 20.304                         | 988.56             | 20072.19           | 6.862                          | 804.12             | 5517.79            |
| A_68_P32118291 | chr19:42056116-42056160                           | NM_145500:-114    | Ubrtd1     | DIVERGENT_PROMOTER     | 0.615                                                        | 0.329                          | 3097.75            | 1018.03            | 0.202                          | 2361.85            | 477.62             |
| A_68_P27688946 | chr11:32355594-32355638                           | NM_173784:245     | Ubrtd2     | INSIDE                 | 0.19                                                         | 28.601                         | 5209.89            | 149010.30          | 5.421                          | 4748.29            | 25740.71           |
| A_68_P27688945 | chr11:32355498-32355542                           | NM_173784:149     | Ubrtd2     | INSIDE                 | 0.484                                                        | 0.546                          | 1734.28            | 947.24             | 0.265                          | 1425.13            | 377.10             |
| A_68_P28078893 | chr11:102178182-102178226                         | NM_001044383:397  | Ubrtf      | INSIDE                 | 0.178                                                        | 3.235                          | 2504.79            | 8102.22            | 0.575                          | 2092.62            | 1203.83            |

| ProbeName      | Target position of probe on CpG island microarray | TargetID           | GeneSymbol | CpG island Description | Ratio of relative methylation (TiO <sub>2</sub> -NP/Vehicle) | Sham group                     |                    |                    | TiO <sub>2</sub> -H group      |                    |                    |
|----------------|---------------------------------------------------|--------------------|------------|------------------------|--------------------------------------------------------------|--------------------------------|--------------------|--------------------|--------------------------------|--------------------|--------------------|
|                |                                                   |                    |            |                        |                                                              | Relative methylation (Cy5/Cy3) | Cy3 signal (Input) | Cy5 signal (MeDIP) | Relative methylation (Cy5/Cy3) | Cy3 signal (Input) | Cy5 signal (MeDIP) |
| A_68_P28078907 | chr11:102180135-102180179                         | NM_001044383:-1555 | Ubtf       | PROMOTER               | 0.621                                                        | 0.578                          | 1183.42            | 683.47             | 0.358                          | 873.60             | 313.14             |
| A_68_P22704455 | chr4:6118180-6118224                              | NM_026534:-49      | Ubxn2b     | PROMOTER               | 0.616                                                        | 0.422                          | 2361.50            | 996.79             | 0.26                           | 1702.39            | 442.49             |
| A_68_P22704457 | chr4:6118424-6118468                              | NM_026534:195      | Ubxn2b     | INSIDE                 | 0.353                                                        | 0.596                          | 926.50             | 551.78             | 0.21                           | 820.51             | 172.58             |
| A_68_P20599492 | chr1:130141015-130141059                          | NM_026390:279      | Ubxn4      | INSIDE                 | 0.566                                                        | 0.371                          | 5094.67            | 1890.51            | 0.21                           | 3951.43            | 829.47             |
| A_68_P20599495 | chr1:130141420-130141464                          | NM_026390:685      | Ubxn4      | INSIDE                 | 0.431                                                        | 0.524                          | 976.86             | 512.12             | 0.226                          | 759.43             | 171.57             |
| A_68_P31253704 | chr17:56213984-56214028                           | NM_024432:406      | Ubxn6      | INSIDE                 | 0.469                                                        | 4.893                          | 13838.65           | 67713.64           | 2.297                          | 9829.10            | 22579.97           |
| A_68_P30651945 | chr16:32332864-32332908                           | NM_177633:549      | Ubxn7      | INSIDE                 | 0.224                                                        | 2.611                          | 2953.26            | 7710.31            | 0.586                          | 2231.18            | 1306.51            |
| A_68_P23763269 | chr5:67068133-67068180                            | NM_011670:797      | Uchl1      | INSIDE                 | 0.617                                                        | 0.527                          | 1662.19            | 875.34             | 0.325                          | 1401.92            | 455.48             |
| A_68_P29856116 | chr14:102053116-102053160                         | NM_016723:-45      | Uchl3      | PROMOTER               | 0.462                                                        | 0.353                          | 1362.99            | 481.77             | 0.163                          | 1025.46            | 167.35             |
| A_68_P20803942 | chr1:169156556-169156600                          | NM_030724:58680    | Uck2       | INSIDE                 | 0.062                                                        | 31.042                         | 3768.01            | 116966.70          | 1.925                          | 2710.74            | 5219.33            |
| A_68_P20803943 | chr1:169156624-169156668                          | NM_030724:58612    | Uck2       | INSIDE                 | 0.124                                                        | 26.520                         | 2920.43            | 77450.41           | 3.295                          | 2152.54            | 7092.25            |
| A_68_P21911426 | chr2:181316540-181316584                          | NM_026765:116      | Uck1       | INSIDE                 | 0.567                                                        | 4.596                          | 1683.94            | 7739.48            | 2.604                          | 1292.03            | 3364.26            |
| A_68_P21911428 | chr2:181316733-181316777                          | NM_026765:-76      | Uck1       | PROMOTER               | 0.356                                                        | 0.631                          | 2793.98            | 1763.07            | 0.224                          | 2180.26            | 489.32             |
| A_68_P23576671 | chr5:31441022-31441066                            | NM_021290:224      | Ucn        | INSIDE                 | 0.58                                                         | 4.313                          | 2403.30            | 10365.56           | 2.5                            | 1961.62            | 4903.76            |
| A_68_P22955050 | chr4:59202567-59202613                            | NM_011673:169      | Ugcg       | INSIDE                 | 0.432                                                        | 0.465                          | 1148.08            | 533.49             | 0.201                          | 854.13             | 171.54             |
| A_68_P22955051 | chr4:59202692-59202736                            | NM_011673:293      | Ugcg       | INSIDE                 | 0.433                                                        | 0.476                          | 1516.57            | 722.07             | 0.206                          | 1248.52            | 257.69             |
| A_68_P22955049 | chr4:59202246-59202290                            | NM_011673:-153     | Ugcg       | PROMOTER               | 0.566                                                        | 3.929                          | 615.15             | 2417.21            | 2.224                          | 531.33             | 1181.92            |
| A_68_P23756355 | chr5:65826987-65827031                            | NM_009466:73       | Ugdh       | INSIDE                 | 0.643                                                        | 3.100                          | 475.49             | 1473.90            | 1.992                          | 405.65             | 808.03             |
| A_68_P27636577 | chr11:21270655-21270699                           | NM_139297:206      | Ugp2       | INSIDE                 | 0.213                                                        | 79.936                         | 2208.96            | 176574.20          | 16.996                         | 4744.49            | 80635.91           |
| A_68_P27636579 | chr11:21270946-21270990                           | NM_139297:-86      | Ugp2       | PROMOTER               | 0.563                                                        | 0.458                          | 3791.47            | 1737.75            | 0.258                          | 3064.67            | 790.64             |
| A_68_P27636581 | chr11:21271108-21271152                           | NM_139297:-248     | Ugp2       | PROMOTER               | 0.301                                                        | 1.533                          | 1643.56            | 2519.76            | 0.461                          | 1408.82            | 649.53             |
| A_68_P20821183 | chr1:172145120-172145164                          | NM_010633:382      | Uhmk1      | INSIDE                 | 0.36                                                         | 5.209                          | 1932.99            | 10069.26           | 1.876                          | 1660.33            | 3115.44            |
| A_68_P31255143 | chr17:56443802-56443846                           | NM_001111078:89    | Uhrf1      | INSIDE                 | 0.247                                                        | 0.478                          | 2123.74            | 1014.44            | 0.118                          | 1618.34            | 190.75             |
| A_68_P31255141 | chr17:56443624-56443668                           | NM_001111078:-89   | Uhrf1      | PROMOTER               | 0.25                                                         | 0.198                          | 9914.40            | 1960.09            | 0.049                          | 6936.55            | 343.35             |
| A_68_P31255142 | chr17:56443737-56443781                           | NM_001111078:23    | Uhrf1      | INSIDE                 | 0.417                                                        | 0.330                          | 2373.17            | 783.57             | 0.138                          | 1778.96            | 244.83             |
| A_68_P31118855 | chr17:27993453-27993497                           | NM_001080769:23    | Uhrf1bp1   | INSIDE                 | 0.429                                                        | 5.652                          | 964.71             | 5452.25            | 2.422                          | 773.09             | 1872.73            |
| A_68_P31118859 | chr17:27993828-27993872                           | NM_001080769:399   | Uhrf1bp1   | INSIDE                 | 0.432                                                        | 0.604                          | 3644.68            | 2202.79            | 0.261                          | 2810.33            | 733.36             |
| A_68_P27332821 | chr10:89207726-89207770                           | NM_029166:13       | Uhrf1bp1l  | INSIDE                 | 0.196                                                        | 12.406                         | 2626.81            | 32588.73           | 2.435                          | 2413.37            | 5876.43            |
| A_68_P32056099 | chr19:30105106-30105150                           | NM_144873:126      | Uhrf2      | INSIDE                 | 0.435                                                        | 15.491                         | 1731.27            | 26819.19           | 6.737                          | 1783.33            | 12014.07           |
| A_68_P32056100 | chr19:30105268-30105312                           | NM_144873:288      | Uhrf2      | INSIDE                 | 0.66                                                         | 2.476                          | 1791.43            | 4435.76            | 1.634                          | 1433.42            | 2342.74            |
| A_68_P27850822 | chr11:61668093-61668137                           | NM_013881:480      | Ulk2       | INSIDE                 | 0.246                                                        | 40.230                         | 3359.80            | 135163.60          | 9.896                          | 4434.13            | 43882.38           |
| A_68_P27850828 | chr11:61668703-61668747                           | NM_013881:-130     | Ulk2       | PROMOTER               | 0.491                                                        | 17.197                         | 2241.70            | 38550.71           | 8.449                          | 2267.35            | 19157.74           |
| A_68_P26542618 | chr9:57437330-57437374                            | NM_027895:94       | Ulk3       | INSIDE                 | 0.572                                                        | 5.579                          | 1153.09            | 6433.44            | 3.189                          | 952.13             | 3036.45            |
| A_68_P27942762 | chr11:78157060-78157104                           | NM_011676:59       | Unc119     | INSIDE                 | 0.443                                                        | 10.608                         | 4713.98            | 50007.22           | 4.702                          | 4436.26            | 20857.16           |
| A_68_P24007966 | chr5:115577255-115577310                          | NM_175352:7702     | Unc119b    | INSIDE                 | 0.315                                                        | 6.127                          | 1117.73            | 6848.68            | 1.931                          | 803.34             | 1551.35            |
| A_68_P25958205 | chr8:74195695-74195739                            | NM_001029873:-60   | Unc13a     | DIVERGENT_PROMOTER     | 0.147                                                        | 15.613                         | 7880.89            | 123046.50          | 2.302                          | 6870.17            | 15815.29           |
| A_68_P25958090 | chr8:74178710-74178754                            | NM_001029873:16924 | Unc13a     | INSIDE                 | 0.355                                                        | 0.394                          | 1942.44            | 764.56             | 0.14                           | 1294.46            | 181.01             |
| A_68_P25958206 | chr8:74195761-74195810                            | NM_001029873:-129  | Unc13a     | DIVERGENT_PROMOTER     | 0.514                                                        | 0.192                          | 2433.00            | 467.79             | 0.099                          | 1750.14            | 172.98             |
| A_68_P22869767 | chr4:43072121-43072165                            | NM_021468:198      | Unc13b     | INSIDE                 | 0.577                                                        | 2.696                          | 1250.52            | 3370.99            | 1.555                          | 940.37             | 1462.10            |
| A_68_P25266128 | chr7:87485010-87485054                            | NM_133952:73       | Unc45a     | INSIDE                 | 0.329                                                        | 0.598                          | 1675.81            | 1001.95            | 0.196                          | 1233.73            | 242.35             |
| A_68_P27969172 | chr11:82744813-82744857                           | NM_178680:20080    | Unc45b     | INSIDE                 | 0.501                                                        | 3.803                          | 3969.26            | 15095.12           | 1.905                          | 3547.15            | 6757.86            |
| A_68_P29052709 | chr13:55098533-55098577                           | NM_153131:47762    | Unc5a      | INSIDE                 | 0.167                                                        | 16.583                         | 788.24             | 13071.43           | 2.773                          | 785.78             | 2179.26            |
| A_68_P29052710 | chr13:55098681-55098725                           | NM_153131:47910    | Unc5a      | INSIDE                 | 0.516                                                        | 3.318                          | 1526.43            | 5065.02            | 1.713                          | 1297.66            | 2223.03            |
| A_68_P29052335 | chr13:55051056-55051100                           | NM_153131:286      | Unc5a      | INSIDE                 | 0.432                                                        | 0.609                          | 834.47             | 508.28             | 0.263                          | 648.87             | 170.90             |
| A_68_P27177056 | chr10:60293675-60293719                           | NM_029770:633      | Unc5b      | INSIDE                 | 0.355                                                        | 7.952                          | 1707.08            | 13574.75           | 2.819                          | 1395.46            | 3933.81            |
| A_68_P27177053 | chr10:60293340-60293384                           | NM_029770:967      | Unc5b      | INSIDE                 | 0.223                                                        | 7.373                          | 1547.85            | 11411.61           | 1.645                          | 1260.73            | 2074.18            |



| ProbeName      | Target position of probe on CpG island microarray | TargetID          | GeneSymbol | CpG island Description | Ratio of relative methylation (TiO <sub>2</sub> -NP/Vehicle) | Sham group                     |                    |                    | TiO <sub>2</sub> -H group      |                    |                    |
|----------------|---------------------------------------------------|-------------------|------------|------------------------|--------------------------------------------------------------|--------------------------------|--------------------|--------------------|--------------------------------|--------------------|--------------------|
|                |                                                   |                   |            |                        |                                                              | Relative methylation (Cy5/Cy3) | Cy3 signal (Input) | Cy5 signal (MeDIP) | Relative methylation (Cy5/Cy3) | Cy3 signal (Input) | Cy5 signal (MeDIP) |
| A_68_P25747455 | chr8:30329725-30329769                            | NM_153135:362     | Unc5d      | INSIDE                 | 0.223                                                        | 29.747                         | 7015.13            | 208678.60          | 6.632                          | 6327.55            | 41964.02           |
| A_68_P28694455 | chr12:104187509-104187553                         | NM_001081017:462  | Unc79      | INSIDE                 | 0.596                                                        | 0.461                          | 1643.72            | 757.08             | 0.275                          | 1366.91            | 375.43             |
| A_68_P28694458 | chr12:104187832-104187876                         | NM_001081017:786  | Unc79      | INSIDE                 | 0.277                                                        | 1.471                          | 1517.82            | 2233.33            | 0.407                          | 1256.75            | 511.43             |
| A_68_P20302824 | chr1:66515076-66515120                            | NM_175510:78      | Unc80      | INSIDE                 | 0.187                                                        | 0.445                          | 2926.51            | 1302.92            | 0.083                          | 2155.88            | 179.75             |
| A_68_P20303908 | chr1:66724124-66724168                            | NM_175510:209126  | Unc80      | INSIDE                 | 0.297                                                        | 45.747                         | 10144.14           | 464059.40          | 13.59                          | 9245.74            | 125648.70          |
| A_68_P20302822 | chr1:66514910-66514954                            | NM_175510:-88     | Unc80      | PROMOTER               | 0.487                                                        | 3.646                          | 1296.54            | 4726.53            | 1.775                          | 1018.82            | 1808.67            |
| A_68_P24136157 | chr5:140020297-140020341                          | NM_013702:467     | Uncx       | INSIDE                 | 0.378                                                        | 7.690                          | 2735.53            | 21035.63           | 2.909                          | 2431.98            | 7073.73            |
| A_68_P24136156 | chr5:140020220-140020264                          | NM_013702:391     | Uncx       | INSIDE                 | 0.578                                                        | 4.804                          | 1623.73            | 7800.91            | 2.778                          | 1267.08            | 3520.29            |
| A_68_P24136155 | chr5:140020104-140020148                          | NM_013702:275     | Uncx       | INSIDE                 | 0.452                                                        | 4.290                          | 415.56             | 1782.79            | 1.937                          | 435.66             | 843.99             |
| A_68_P24002094 | chr5:114581485-114581529                          | NM_011677:342     | Ung        | INSIDE                 | 0.248                                                        | 0.540                          | 2473.90            | 1336.67            | 0.134                          | 1856.91            | 248.73             |
| A_68_P31102167 | chr17:25325180-25325224                           | NM_001197024:-142 | Unkl       | PROMOTER               | 0.355                                                        | 7.681                          | 1143.92            | 8786.32            | 2.73                           | 1041.02            | 2842.13            |
| A_68_P31102174 | chr17:25326044-25326091                           | NM_001197024:723  | Unkl       | INSIDE                 | 0.366                                                        | 0.365                          | 1802.61            | 658.65             | 0.134                          | 1293.94            | 173.18             |
| A_68_P31102168 | chr17:25325357-25325401                           | NM_001197024:34   | Unkl       | INSIDE                 | 0.37                                                         | 4.285                          | 17844.48           | 76455.40           | 1.587                          | 16840.51           | 26720.24           |
| A_68_P20976549 | chr2:5872087-5872131                              | NM_001081132:-406 | Upf2       | DIVERGENT_PROMOTER     | 0.604                                                        | 0.217                          | 2460.79            | 533.96             | 0.131                          | 1782.96            | 233.49             |
| A_68_P25670554 | chr8:13785750-13785794                            | NM_025924:158     | Upf3a      | INSIDE                 | 0.611                                                        | 7.105                          | 2314.73            | 16446.13           | 4.34                           | 1848.79            | 8023.05            |
| A_68_P25670551 | chr8:13785477-13785521                            | NM_025924:-116    | Upf3a      | PROMOTER               | 0.633                                                        | 3.275                          | 1463.75            | 4793.70            | 2.072                          | 1082.54            | 2242.75            |
| A_68_P21768463 | chr2:155755683-155755727                          | NM_018888:342     | Uqcc       | INSIDE                 | 0.507                                                        | 4.577                          | 3153.32            | 14433.86           | 2.32                           | 2430.23            | 5639.13            |
| A_68_P27283011 | chr10:79869405-79869449                           | NM_025650:140     | Uqcr11     | INSIDE                 | 0.483                                                        | 0.494                          | 1213.96            | 599.47             | 0.239                          | 844.24             | 201.47             |
| A_68_P26817224 | chr9:108838919-108838963                          | NM_025407:280     | Uqcre1     | INSIDE                 | 0.266                                                        | 9.574                          | 4933.57            | 47232.61           | 2.547                          | 4242.02            | 10804.94           |
| A_68_P25469455 | chr7:127778730-127778774                          | NM_025899:50      | Uqcre2     | INSIDE                 | 0.282                                                        | 0.417                          | 1801.67            | 751.29             | 0.118                          | 1414.72            | 166.50             |
| A_68_P27804722 | chr11:53244281-53244325                           | NM_025352:31      | Uqcrq      | INSIDE                 | 0.642                                                        | 3.053                          | 715.21             | 2183.24            | 1.959                          | 669.01             | 1310.57            |
| A_68_P30959122 | chr16:90810767-90810811                           | NM_029497:-130    | Urb1       | PROMOTER               | 0.326                                                        | 1.720                          | 7203.96            | 12392.99           | 0.56                           | 5600.60            | 3136.50            |
| A_68_P20827835 | chr1:173341606-173341650                          | NM_009480:-183    | Usf1       | PROMOTER               | 0.515                                                        | 3.650                          | 1106.49            | 4038.76            | 1.878                          | 996.76             | 1872.35            |
| A_68_P25034259 | chr7:31742709-31742753                            | NM_011680:-908    | Usf2       | PROMOTER               | 0.56                                                         | 0.302                          | 1632.50            | 493.00             | 0.169                          | 1225.09            | 207.25             |
| A_68_P25034246 | chr7:31740698-31740742                            | NM_011680:1102    | Usf2       | INSIDE                 | 0.504                                                        | 3.320                          | 1110.87            | 3687.77            | 1.672                          | 1040.73            | 1740.36            |
| A_68_P25034247 | chr7:31740799-31740843                            | NM_011680:1002    | Usf2       | INSIDE                 | 0.451                                                        | 3.619                          | 990.99             | 3586.64            | 1.633                          | 872.97             | 1425.56            |
| A_68_P28152781 | chr11:115183238-115183282                         | NM_176847:-28     | Ush1g      | PROMOTER               | 0.153                                                        | 38.563                         | 5518.96            | 212828.80          | 5.89                           | 9897.43            | 58292.24           |
| A_68_P28152750 | chr11:115179759-115179803                         | NM_176847:3452    | Ush1g      | INSIDE                 | 0.364                                                        | 0.682                          | 1807.60            | 1233.48            | 0.248                          | 1497.44            | 371.84             |
| A_68_P32147605 | chr19:47164876-47164920                           | NM_023211:217     | Usmg5      | INSIDE                 | 0.618                                                        | 0.700                          | 1728.07            | 1209.69            | 0.432                          | 1282.08            | 554.37             |
| A_68_P23892504 | chr5:92567234-92567278                            | NM_019490:293     | Uso1       | INSIDE                 | 0.456                                                        | 1.373                          | 1978.54            | 2716.25            | 0.626                          | 1719.24            | 1075.47            |
| A_68_P26217005 | chr8:122480667-122480711                          | NM_009462:45937   | Usp10      | INSIDE                 | 0.113                                                        | 24.920                         | 6984.46            | 174055.60          | 2.819                          | 5820.23            | 16408.36           |
| A_68_P31487968 | chr18:10030044-10030088                           | NM_001038589:81   | Usp14      | INSIDE                 | 0.48                                                         | 0.717                          | 3348.88            | 2401.55            | 0.344                          | 2436.85            | 839.25             |
| A_68_P24803059 | chr6:121195955-121195999                          | NM_011909:53      | Usp18      | INSIDE                 | 0.253                                                        | 8.105                          | 1162.70            | 9423.85            | 2.055                          | 1081.67            | 2222.32            |
| A_68_P32975180 | chr9:108393143-108393187                          | NM_027804:158     | Usp19      | INSIDE                 | 0.57                                                         | 3.862                          | 1446.94            | 5587.74            | 2.202                          | 1165.90            | 2567.49            |
| A_68_P26465575 | chr9:43892820-43892864                            | NM_198091:-160    | Usp2       | PROMOTER               | 0.435                                                        | 0.485                          | 981.69             | 476.04             | 0.211                          | 809.13             | 170.69             |
| A_68_P20827151 | chr1:173217930-173217974                          | NM_013919:140     | Usp21      | INSIDE                 | 0.359                                                        | 1.958                          | 2982.46            | 5840.73            | 0.703                          | 2649.78            | 1861.85            |
| A_68_P27846975 | chr11:60987984-60988028                           | NM_001004143:555  | Usp22      | INSIDE                 | 0.476                                                        | 0.431                          | 5170.89            | 2230.40            | 0.205                          | 3616.36            | 742.69             |
| A_68_P23183546 | chr4:105988404-105988448                          | NM_183225:-391    | Usp24      | PROMOTER               | 0.585                                                        | 0.495                          | 1562.33            | 772.90             | 0.289                          | 1186.52            | 343.13             |
| A_68_P26494984 | chr9:48793240-48793284                            | NM_175482:-227    | Usp28      | PROMOTER               | 0.244                                                        | 1.402                          | 7010.19            | 9827.68            | 0.342                          | 4904.73            | 1676.99            |
| A_68_P26494985 | chr9:48793375-48793419                            | NM_175482:-93     | Usp28      | PROMOTER               | 0.388                                                        | 1.392                          | 7579.24            | 10546.68           | 0.539                          | 5805.48            | 3130.47            |
| A_68_P26494989 | chr9:48793954-48794001                            | NM_175482:488     | Usp28      | INSIDE                 | 0.563                                                        | 0.501                          | 897.93             | 449.83             | 0.282                          | 713.23             | 201.23             |
| A_68_P26593991 | chr9:66440276-66440320                            | NM_144937:489     | Usp3       | INSIDE                 | 0.576                                                        | 5.936                          | 716.89             | 4255.84            | 3.417                          | 667.22             | 2279.95            |
| A_68_P27981393 | chr11:84953057-84953101                           | NM_001029934:379  | Usp32      | INSIDE                 | 0.306                                                        | 1.562                          | 16362.56           | 25565.40           | 0.478                          | 12773.99           | 6102.77            |
| A_68_P22650044 | chr3:152009738-152009782                          | NM_001076676:316  | Usp33      | INSIDE                 | 0.653                                                        | 5.228                          | 786.11             | 4110.09            | 3.415                          | 662.34             | 2261.62            |
| A_68_P25349897 | chr7:104474502-104474546                          | NM_001177412:-50  | Usp35      | DIVERGENT_PROMOTER     | 0.51                                                         | 3.201                          | 2097.29            | 6712.78            | 1.633                          | 1627.33            | 2658.00            |
| A_68_P28170438 | chr11:118151273-118151317                         | NM_001033528:264  | Usp36      | INSIDE                 | 0.483                                                        | 0.206                          | 3290.31            | 678.34             | 0.1                            | 2105.36            | 209.48             |

| ProbeName      | Target position of probe on CpG island microarray | TargetID          | GeneSymbol | CpG island Description | Ratio of relative methylation (TiO <sub>2</sub> -NP/Vehicle) | Sham group                     |                    |                    | TiO <sub>2</sub> -H group      |                    |                    |
|----------------|---------------------------------------------------|-------------------|------------|------------------------|--------------------------------------------------------------|--------------------------------|--------------------|--------------------|--------------------------------|--------------------|--------------------|
|                |                                                   |                   |            |                        |                                                              | Relative methylation (Cy5/Cy3) | Cy3 signal (Input) | Cy5 signal (MeDIP) | Relative methylation (Cy5/Cy3) | Cy3 signal (Input) | Cy5 signal (MeDIP) |
| A_68_P28170437 | chr11:118151196-118151240                         | NM_001033528:340  | Usp36      | INSIDE                 | 0.381                                                        | 0.729                          | 2839.97            | 2070.31            | 0.278                          | 1876.40            | 521.53             |
| A_68_P26814408 | chr9:108250538-108250582                          | NM_011678:399     | Usp4       | INSIDE                 | 0.477                                                        | 0.450                          | 1307.37            | 588.64             | 0.215                          | 1070.12            | 229.65             |
| A_68_P26814406 | chr9:108250276-108250320                          | NM_011678:137     | Usp4       | INSIDE                 | 0.503                                                        | 0.245                          | 1869.63            | 457.55             | 0.123                          | 1526.10            | 187.83             |
| A_68_P26814405 | chr9:108250089-108250133                          | NM_011678:-51     | Usp4       | PROMOTER               | 0.525                                                        | 6.024                          | 1538.15            | 9266.21            | 3.161                          | 1242.00            | 3926.20            |
| A_68_P20421182 | chr1:89904977-89905021                            | NM_001033291:128  | Usp40      | INSIDE                 | 0.267                                                        | 9.377                          | 4266.98            | 40009.58           | 2.506                          | 3702.54            | 9279.79            |
| A_68_P24158012 | chr5:144493603-144493647                          | NM_029749:-475    | Usp42      | PROMOTER               | 0.368                                                        | 0.545                          | 1475.76            | 804.92             | 0.201                          | 1308.55            | 263.00             |
| A_68_P27886200 | chr11:67735519-67735563                           | NM_173754:115     | Usp43      | INSIDE                 | 0.557                                                        | 3.474                          | 1391.90            | 4835.16            | 1.935                          | 1213.41            | 2347.55            |
| A_68_P27886202 | chr11:67735776-67735820                           | NM_173754:-143    | Usp43      | PROMOTER               | 0.313                                                        | 1.468                          | 1317.77            | 1934.66            | 0.459                          | 1125.23            | 517.01             |
| A_68_P27886201 | chr11:67735651-67735695                           | NM_173754:-17     | Usp43      | PROMOTER               | 0.435                                                        | 4.729                          | 446.81             | 2113.06            | 2.059                          | 427.61             | 880.29             |
| A_68_P27355931 | chr10:93296360-93296404                           | NM_183199:2083    | Usp44      | INSIDE                 | 0.599                                                        | 0.475                          | 1411.40            | 671.09             | 0.285                          | 1062.83            | 302.93             |
| A_68_P27355937 | chr10:93297003-93297047                           | NM_183199:2725    | Usp44      | INSIDE                 | 0.621                                                        | 2.803                          | 1930.38            | 5410.32            | 1.74                           | 1608.41            | 2797.89            |
| A_68_P23801063 | chr5:74464594-74464638                            | NM_177561:-180    | Usp46      | PROMOTER               | 0.553                                                        | 0.452                          | 2382.84            | 1077.88            | 0.25                           | 1784.36            | 446.76             |
| A_68_P23340749 | chr4:137150280-137150324                          | NM_130879:199     | Usp48      | INSIDE                 | 0.431                                                        | 0.458                          | 1331.25            | 610.35             | 0.198                          | 1180.72            | 233.30             |
| A_68_P31213521 | chr17:47809690-47809734                           | NM_198421:42074   | Usp49      | INSIDE                 | 0.522                                                        | 4.586                          | 2288.15            | 10492.34           | 2.393                          | 2035.79            | 4872.52            |
| A_68_P31213274 | chr17:47766353-47766397                           | NM_198421:-1264   | Usp49      | PROMOTER               | 0.454                                                        | 0.668                          | 1360.10            | 909.15             | 0.303                          | 1028.76            | 312.12             |
| A_68_P31213275 | chr17:47766487-47766531                           | NM_198421:-1130   | Usp49      | PROMOTER               | 0.425                                                        | 1.345                          | 8293.25            | 11154.79           | 0.571                          | 5439.96            | 3107.51            |
| A_68_P24817210 | chr6:124779618-124779662                          | NM_013700:-175    | Usp5       | DIVERGENT_PROMOTER     | 0.564                                                        | 0.244                          | 2817.97            | 686.36             | 0.137                          | 1909.71            | 262.38             |
| A_68_P32751543 | chrX:149442021-149442065                          | NM_001137547:1031 | Usp51      | INSIDE                 | 0.382                                                        | 9.961                          | 995.35             | 9914.25            | 3.809                          | 1377.41            | 5246.05            |
| A_68_P21609529 | chr2:126533259-126533303                          | NM_019729:182     | Usp8       | INSIDE                 | 0.482                                                        | 0.640                          | 887.08             | 568.06             | 0.308                          | 758.30             | 233.87             |
| A_68_P24183692 | chr5:149996457-149996501                          | NM_001013378:343  | Usp11      | INSIDE                 | 0.442                                                        | 1.502                          | 4845.24            | 7276.85            | 0.664                          | 3331.99            | 2212.19            |
| A_68_P26924749 | chr10:8238335-8238379                             | NM_177387:267     | Ust        | INSIDE                 | 0.609                                                        | 0.398                          | 3258.08            | 1298.29            | 0.243                          | 2681.70            | 650.88             |
| A_68_P25581335 | chr7:147129738-147129782                          | NM_009482:6       | Utlf1      | INSIDE                 | 0.586                                                        | 0.281                          | 2515.92            | 707.88             | 0.165                          | 1935.41            | 319.21             |
| A_68_P32363781 | chrX:45638888-45638932                            | NM_028276:28800   | Utp14a     | DOWNSTREAM             | 0.645                                                        | 5.807                          | 3357.09            | 19493.72           | 3.748                          | 3802.11            | 14248.69           |
| A_68_P20372363 | chr1:78654178-78654222                            | NM_001001981:-199 | Utp14b     | PROMOTER               | 0.093                                                        | 26.790                         | 1278.64            | 34254.76           | 2.486                          | 1142.92            | 2841.70            |
| A_68_P20372367 | chr1:78654608-78654652                            | NM_001136226:-384 | Utp14b     | PROMOTER               | 0.501                                                        | 6.005                          | 1602.32            | 9621.33            | 3.011                          | 1344.53            | 4048.06            |
| A_68_P28029564 | chr11:93746411-93746455                           | NM_001013375:648  | Utp18      | INSIDE                 | 0.256                                                        | 9.139                          | 6959.49            | 63605.10           | 2.344                          | 6746.99            | 15813.23           |
| A_68_P26947987 | chr10:12588699-12588743                           | NM_011682:-7187   | Utrn       | PROMOTER               | 0.38                                                         | 0.650                          | 1122.31            | 729.59             | 0.247                          | 1001.24            | 247.31             |
| A_68_P20191095 | chr1:43884838-43884882                            | NM_026430:-307    | Uxs1       | PROMOTER               | 0.283                                                        | 0.521                          | 1434.72            | 747.53             | 0.147                          | 1173.02            | 172.94             |
| A_68_P26163689 | chr8:113142496-113142540                          | NM_146216:-19     | Vac14      | PROMOTER               | 0.481                                                        | 0.362                          | 1270.64            | 460.11             | 0.174                          | 993.47             | 173.05             |
| A_68_P24819389 | chr6:125165905-125165949                          | NM_001080557:328  | Vamp1      | INSIDE                 | 0.556                                                        | 3.845                          | 1140.19            | 4383.50            | 2.138                          | 983.93             | 2103.59            |
| A_68_P20778496 | chr1:164501404-164501449                          | NM_016796:468     | Vamp4      | INSIDE                 | 0.392                                                        | 6.988                          | 878.02             | 6135.81            | 2.738                          | 680.98             | 1864.57            |
| A_68_P24541411 | chr6:72330618-72330663                            | NM_001080742:-178 | Vamp5      | PROMOTER               | 0.562                                                        | 0.510                          | 1278.88            | 652.66             | 0.287                          | 959.20             | 275.29             |
| A_68_P31156940 | chr17:35137702-35137746                           | NM_011690:-127    | Vars       | PROMOTER               | 0.552                                                        | 0.340                          | 1410.73            | 479.16             | 0.188                          | 1001.84            | 187.96             |
| A_68_P31156941 | chr17:35137890-35137934                           | NM_011690:61      | Vars       | INSIDE                 | 0.426                                                        | 3.987                          | 975.92             | 3891.01            | 1.698                          | 807.25             | 1370.69            |
| A_68_P24992394 | chr7:19856763-19856807                            | NM_009499:419     | Vasp       | INSIDE                 | 0.294                                                        | 5.209                          | 1530.72            | 7973.63            | 1.531                          | 1246.47            | 1907.98            |
| A_68_P21084626 | chr2:27282675-27282719                            | NM_009500:-351    | Vav2       | PROMOTER               | 0.512                                                        | 4.115                          | 1005.73            | 4139.00            | 2.106                          | 886.53             | 1866.84            |
| A_68_P21084621 | chr2:27281926-27281970                            | NM_009500:397     | Vav2       | INSIDE                 | 0.611                                                        | 4.640                          | 1258.84            | 5841.58            | 2.835                          | 1060.10            | 3005.64            |
| A_68_P21084617 | chr2:27281328-27281372                            | NM_009500:995     | Vav2       | INSIDE                 | 0.661                                                        | 0.630                          | 3003.28            | 1893.12            | 0.417                          | 2295.80            | 957.05             |
| A_68_P32217690 | chr19:59244706-59244750                           | NM_009501:-209    | Vax1       | PROMOTER               | 0.374                                                        | 5.288                          | 3436.05            | 18169.27           | 1.979                          | 3155.62            | 6244.40            |
| A_68_P32217657 | chr19:59240762-59240806                           | NM_009501:3735    | Vax1       | INSIDE                 | 0.507                                                        | 0.308                          | 1698.24            | 522.72             | 0.156                          | 1106.35            | 172.75             |
| A_68_P32217704 | chr19:59246215-59246259                           | NM_009501:-1717   | Vax1       | PROMOTER               | 0.581                                                        | 4.554                          | 3344.34            | 15228.67           | 2.647                          | 2570.32            | 6803.99            |
| A_68_P32217658 | chr19:59240861-59240905                           | NM_009501:3637    | Vax1       | INSIDE                 | 0.618                                                        | 0.554                          | 1146.76            | 635.07             | 0.342                          | 1030.08            | 352.77             |
| A_68_P32217702 | chr19:59246036-59246083                           | NM_009501:-1540   | Vax1       | PROMOTER               | 0.183                                                        | 2.413                          | 1341.76            | 3238.23            | 0.441                          | 943.20             | 415.91             |
| A_68_P32217685 | chr19:59244013-59244057                           | NM_009501:485     | Vax1       | INSIDE                 | 0.447                                                        | 0.597                          | 806.34             | 481.48             | 0.267                          | 642.80             | 171.68             |
| A_68_P24594973 | chr6:83652821-83652865                            | NR_002873:8084    | Vax2os1    | INSIDE                 | 0.593                                                        | 3.747                          | 1169.85            | 4383.01            | 2.223                          | 965.36             | 2145.99            |
| A_68_P29449770 | chr14:21748700-21748744                           | NM_009502:68      | Vcl        | INSIDE                 | 0.429                                                        | 8.204                          | 4020.15            | 32980.67           | 3.521                          | 3297.88            | 11612.28           |

| ProbeName      | Target position of probe on CpG island microarray | TargetID           | GeneSymbol | CpG island Description | Ratio of relative methylation (TiO <sub>2</sub> -NP/Vehicle) | Sham group                     |                    |                    | TiO <sub>2</sub> -H group      |                    |                    |
|----------------|---------------------------------------------------|--------------------|------------|------------------------|--------------------------------------------------------------|--------------------------------|--------------------|--------------------|--------------------------------|--------------------|--------------------|
|                |                                                   |                    |            |                        |                                                              | Relative methylation (Cy5/Cy3) | Cy3 signal (Input) | Cy5 signal (MeDIP) | Relative methylation (Cy5/Cy3) | Cy3 signal (Input) | Cy5 signal (MeDIP) |
| A_68_P29449769 | chr14:21748618-21748662                           | NM_009502:-14      | Vcl        | PROMOTER               | 0.636                                                        | 0.338                          | 4290.40            | 1452.10            | 0.215                          | 3005.68            | 647.13             |
| A_68_P27798802 | chr11:52174768-52174812                           | NM_011694:174      | Vdac1      | INSIDE                 | 0.163                                                        | 2.682                          | 1028.93            | 2759.30            | 0.438                          | 906.19             | 397.01             |
| A_68_P29455108 | chr14:22650786-22650830                           | NM_011695:26       | Vdac2      | INSIDE                 | 0.514                                                        | 13.124                         | 822.06             | 10788.91           | 6.748                          | 690.90             | 4661.87            |
| A_68_P29455105 | chr14:22650386-22650430                           | NM_011695:-374     | Vdac2      | PROMOTER               | 0.351                                                        | 4.280                          | 2435.52            | 10425.08           | 1.501                          | 2235.30            | 3355.37            |
| A_68_P30471846 | chr15:97738704-97738748                           | NM_009504:1        | Vdr        | INSIDE                 | 0.21                                                         | 0.462                          | 2858.32            | 1320.86            | 0.097                          | 2076.91            | 201.51             |
| A_68_P30471844 | chr15:97738350-97738394                           | NM_009504:355      | Vdr        | INSIDE                 | 0.357                                                        | 0.292                          | 2329.31            | 679.96             | 0.104                          | 1729.66            | 180.14             |
| A_68_P30471845 | chr15:97738527-97738571                           | NM_009504:179      | Vdr        | INSIDE                 | 0.382                                                        | 0.276                          | 2381.94            | 657.98             | 0.105                          | 1640.41            | 172.99             |
| A_68_P31204668 | chr17:46168904-46168948                           | NM_001110266:-6814 | Vegfa      | PROMOTER               | 0.406                                                        | 0.479                          | 2341.79            | 1121.77            | 0.195                          | 1760.34            | 342.67             |
| A_68_P31204664 | chr17:46168459-46168503                           | NM_001110266:-6368 | Vegfa      | PROMOTER               | 0.615                                                        | 6.709                          | 2358.58            | 15823.53           | 4.124                          | 2130.40            | 8786.20            |
| A_68_P31204659 | chr17:46167970-46168014                           | NM_001110266:-5880 | Vegfa      | PROMOTER               | 0.635                                                        | 0.397                          | 2738.50            | 1085.98            | 0.252                          | 1898.00            | 478.22             |
| A_68_P31937159 | chr19:7062178-7062222                             | NM_001185164:-59   | Vegfb      | PROMOTER               | 0.323                                                        | 10.485                         | 3940.23            | 41311.66           | 3.383                          | 3110.36            | 10520.87           |
| A_68_P27357055 | chr10:93498582-93498626                           | NM_172538:-111     | Vezt       | DIVERGENT_PROMOTER     | 0.443                                                        | 0.166                          | 3716.71            | 616.98             | 0.074                          | 2769.04            | 203.63             |
| A_68_P24124227 | chr5:137507750-137507794                          | NM_001039385:1608  | Vgf        | INSIDE                 | 0.507                                                        | 9.433                          | 499.83             | 4714.95            | 4.783                          | 521.99             | 2496.69            |
| A_68_P24124211 | chr5:137505950-137505994                          | NM_001039385:-192  | Vgf        | PROMOTER               | 0.405                                                        | 4.267                          | 1070.76            | 4568.45            | 1.726                          | 830.78             | 1433.97            |
| A_68_P27135755 | chr10:51747513-51747557                           | NM_153786:5043     | Vgll2      | INSIDE                 | 0.489                                                        | 1.384                          | 3160.43            | 4373.09            | 0.677                          | 2699.44            | 1827.98            |
| A_68_P27135713 | chr10:51742583-51742627                           | NM_153786:113      | Vgll2      | INSIDE                 | 0.446                                                        | 1.439                          | 1699.31            | 2445.21            | 0.642                          | 1452.97            | 933.45             |
| A_68_P30826541 | chr16:65815730-65815774                           | NM_028572:-125     | Vgll3      | PROMOTER               | 0.558                                                        | 6.091                          | 847.50             | 5162.17            | 3.397                          | 760.84             | 2584.54            |
| A_68_P24760552 | chr6:113574106-113574150                          | NM_009507:114      | Vhl        | INSIDE                 | 0.361                                                        | 0.482                          | 1238.43            | 596.52             | 0.174                          | 985.11             | 171.45             |
| A_68_P21017264 | chr2:13495981-13496025                            | NM_011701:65       | Vim        | INSIDE                 | 0.436                                                        | 7.670                          | 3027.34            | 23220.35           | 3.346                          | 2527.76            | 8458.13            |
| A_68_P21017265 | chr2:13496059-13496103                            | NM_011701:143      | Vim        | INSIDE                 | 0.471                                                        | 0.561                          | 1071.73            | 601.09             | 0.264                          | 879.94             | 232.67             |
| A_68_P28765897 | chr12:117316101-117316145                         | NM_009511:-73      | Vipr2      | PROMOTER               | 0.538                                                        | 0.314                          | 2312.97            | 725.55             | 0.169                          | 1857.53            | 313.53             |
| A_68_P24091293 | chr5:130418207-130418251                          | NM_001001327:246   | Vkorc1l1   | INSIDE                 | 0.337                                                        | 14.562                         | 1401.25            | 20405.02           | 4.91                           | 1286.23            | 6314.99            |
| A_68_P24091286 | chr5:130417459-130417503                          | NM_001001327:-502  | Vkorc1l1   | PROMOTER               | 0.28                                                         | 1.625                          | 9001.68            | 14623.46           | 0.454                          | 5478.56            | 2487.71            |
| A_68_P31257914 | chr17:56856378-56856423                           | NM_178926:-56      | Vmac       | PROMOTER               | 0.358                                                        | 10.857                         | 1274.93            | 13841.94           | 3.883                          | 1457.09            | 5657.88            |
| A_68_P31257916 | chr17:56856619-56856667                           | NM_178926:-298     | Vmac       | PROMOTER               | 0.049                                                        | 1.466                          | 4395.06            | 6441.24            | 0.072                          | 2470.41            | 177.21             |
| A_68_P24630038 | chr6:89785494-89785538                            | NM_053221:10015    | Vmn1r42    | DOWNSTREAM             | 0.205                                                        | 13.011                         | 1310.26            | 17047.42           | 2.667                          | 1012.65            | 2700.36            |
| A_68_P24630036 | chr6:89785323-89785367                            | NM_053221:10187    | Vmn1r42    | DOWNSTREAM             | 0.226                                                        | 8.776                          | 1196.35            | 10498.54           | 1.984                          | 957.41             | 1899.19            |
| A_68_P24630040 | chr6:89785772-89785816                            | NM_053221:9737     | Vmn1r42    | DOWNSTREAM             | 0.324                                                        | 6.657                          | 1548.13            | 10306.38           | 2.16                           | 1516.70            | 3276.24            |
| A_68_P24480348 | chr6:57774597-57774643                            | NM_146168:499      | Vopp1      | INSIDE                 | 0.607                                                        | 0.655                          | 1035.62            | 678.34             | 0.397                          | 827.49             | 328.79             |
| A_68_P26805304 | chr9:106724237-106724281                          | NM_001015507:-48   | Vprbp      | PROMOTER               | 0.654                                                        | 0.559                          | 1581.47            | 883.32             | 0.365                          | 1169.58            | 427.22             |
| A_68_P26805306 | chr9:106724414-106724458                          | NM_001015507:130   | Vprbp      | INSIDE                 | 0.3                                                          | 1.454                          | 3471.08            | 5046.43            | 0.436                          | 3013.62            | 1314.19            |
| A_68_P31982219 | chr19:16855558-16855602                           | NM_173028:-163     | Vps13a     | PROMOTER               | 0.527                                                        | 7.738                          | 1726.93            | 13362.57           | 4.074                          | 1473.37            | 6002.89            |
| A_68_P30133053 | chr15:35301385-35301429                           | NM_177151:106      | Vps13b     | INSIDE                 | 0.359                                                        | 0.675                          | 903.65             | 609.62             | 0.242                          | 715.60             | 173.07             |
| A_68_P30133052 | chr15:35301302-35301346                           | NM_177151:24       | Vps13b     | INSIDE                 | 0.644                                                        | 2.684                          | 715.80             | 1921.11            | 1.728                          | 608.95             | 1052.33            |
| A_68_P26601300 | chr9:67688155-67688199                            | NM_177184:-26      | Vps13c     | DIVERGENT_PROMOTER     | 0.334                                                        | 9.346                          | 3134.86            | 29297.93           | 3.122                          | 2896.51            | 9043.62            |
| A_68_P23381901 | chr4:144785001-144785047                          | NM_001128198:-4529 | Vps13d     | PROMOTER               | 0.086                                                        | 29.295                         | 972.55             | 28490.65           | 2.518                          | 847.36             | 2133.83            |
| A_68_P23381898 | chr4:144784634-144784678                          | NM_001128198:-4161 | Vps13d     | PROMOTER               | 0.445                                                        | 5.282                          | 1153.26            | 6091.41            | 2.352                          | 986.39             | 2319.78            |
| A_68_P24536895 | chr6:71493871-71493915                            | NM_025783:45       | Vps24      | INSIDE                 | 0.284                                                        | 18.313                         | 2835.51            | 51925.97           | 5.2                            | 2771.85            | 14412.25           |
| A_68_P24536901 | chr6:71494350-71494394                            | NM_025783:525      | Vps24      | INSIDE                 | 0.407                                                        | 0.646                          | 773.03             | 499.11             | 0.262                          | 658.17             | 172.74             |
| A_68_P27186307 | chr10:61949576-61949620                           | NM_133672:-45      | Vps26a     | PROMOTER               | 0.309                                                        | 8.332                          | 1278.18            | 10650.14           | 2.573                          | 1163.90            | 2994.17            |
| A_68_P24049903 | chr5:122804592-122804636                          | NM_019780:193      | Vps29      | INSIDE                 | 0.628                                                        | 2.615                          | 1950.40            | 5100.00            | 1.642                          | 1601.18            | 2629.69            |
| A_68_P25806165 | chr8:41596899-41596943                            | NM_033560:-216     | Vps37a     | DIVERGENT_PROMOTER     | 0.444                                                        | 3.941                          | 3225.29            | 12710.11           | 1.75                           | 2437.83            | 4266.35            |
| A_68_P26142730 | chr8:109555781-109555825                          | NM_126165:577      | Vps4a      | INSIDE                 | 0.635                                                        | 3.645                          | 801.51             | 2921.40            | 2.316                          | 627.07             | 1452.45            |
| A_68_P27635752 | chr11:21139299-21139343                           | NM_139061:429      | Vps54      | INSIDE                 | 0.504                                                        | 8.505                          | 1716.75            | 14600.85           | 4.283                          | 1454.87            | 6231.57            |
| A_68_P27635747 | chr11:21138559-21138603                           | NM_139061:-311     | Vps54      | PROMOTER               | 0.358                                                        | 0.650                          | 3920.25            | 2547.82            | 0.233                          | 2793.68            | 650.24             |
| A_68_P30592417 | chr16:21423184-21423228                           | NM_001081366:16    | Vps8       | INSIDE                 | 0.626                                                        | 3.405                          | 710.09             | 2418.06            | 2.133                          | 733.28             | 1564.24            |

| ProbeName      | Target position of probe on CpG island microarray | TargetID          | GeneSymbol | CpG island Description | Ratio of relative methylation (TiO <sub>2</sub> -NP/Vehicle) | Sham group                     |                    |                    | TiO <sub>2</sub> -H group      |                    |                    |
|----------------|---------------------------------------------------|-------------------|------------|------------------------|--------------------------------------------------------------|--------------------------------|--------------------|--------------------|--------------------------------|--------------------|--------------------|
|                |                                                   |                   |            |                        |                                                              | Relative methylation (Cy5/Cy3) | Cy3 signal (Input) | Cy5 signal (MeDIP) | Relative methylation (Cy5/Cy3) | Cy3 signal (Input) | Cy5 signal (MeDIP) |
| A_68_P28712491 | chr12:107248439-107248483                         | NM_001029843:-12  | Vrk1       | PROMOTER               | 0.619                                                        | 0.317                          | 1521.11            | 482.70             | 0.197                          | 1173.76            | 230.73             |
| A_68_P27663517 | chr11:26493581-26493625                           | NM_027260:318     | Vrk2       | INSIDE                 | 0.531                                                        | 2.914                          | 1597.12            | 4654.19            | 1.547                          | 1507.61            | 2332.12            |
| A_68_P20833903 | chr1:174493113-174493157                          | NR_027644:3098    | Vsig8      | INSIDE                 | 0.55                                                         | 3.062                          | 2433.69            | 7451.77            | 1.684                          | 2084.88            | 3511.43            |
| A_68_P25075288 | chr7:48157851-48157898                            | NM_021387:3227    | Vstm2b     | INSIDE                 | 0.576                                                        | 0.422                          | 1087.53            | 458.80             | 0.243                          | 806.10             | 195.71             |
| A_68_P21780087 | chr2:157769902-157769946                          | NM_198627:29536   | Vstm2l     | INSIDE                 | 0.055                                                        | 9.334                          | 2107.58            | 19672.56           | 0.518                          | 1581.10            | 819.02             |
| A_68_P28599061 | chr12:85911065-85911109                           | NM_007701:285     | Vsx2       | INSIDE                 | 0.639                                                        | 0.339                          | 1748.42            | 593.53             | 0.217                          | 1463.05            | 317.31             |
| A_68_P26958515 | chr10:14425185-14425230                           | NM_025418:88      | Vta1       | INSIDE                 | 0.359                                                        | 0.523                          | 1471.28            | 770.08             | 0.188                          | 1107.04            | 207.74             |
| A_68_P28567992 | chr12:80273136-80273180                           | NM_016800:287     | Vti1b      | INSIDE                 | 0.576                                                        | 0.480                          | 2432.19            | 1167.40            | 0.276                          | 1959.67            | 541.32             |
| A_68_P32203587 | chr19:56948670-56948714                           | NM_172840:-213    | Vwa2       | PROMOTER               | 0.545                                                        | 5.186                          | 2940.63            | 15249.80           | 2.824                          | 2146.29            | 6060.69            |
| A_68_P32203589 | chr19:56948890-56948934                           | NM_172840:7       | Vwa2       | INSIDE                 | 0.558                                                        | 0.521                          | 1747.23            | 911.04             | 0.291                          | 1478.97            | 430.00             |
| A_68_P25470426 | chr7:127953525-127953569                          | NM_177697:70476   | Vwa3a      | DOWNSTREAM             | 0.509                                                        | 0.610                          | 4828.66            | 2945.58            | 0.31                           | 3300.86            | 1024.12            |
| A_68_P30588341 | chr16:20591588-20591632                           | NM_182636:1956    | Vwa5b2     | INSIDE                 | 0.215                                                        | 11.729                         | 2114.48            | 24801.46           | 2.521                          | 1810.32            | 4563.05            |
| A_68_P30588338 | chr16:20591336-20591380                           | NM_182636:1704    | Vwa5b2     | INSIDE                 | 0.369                                                        | 6.945                          | 2226.40            | 15461.78           | 2.563                          | 1806.56            | 4629.48            |
| A_68_P27589636 | chr11:11014080-11014124                           | NM_177033:84      | Vwc2       | INSIDE                 | 0.629                                                        | 0.640                          | 1533.69            | 980.99             | 0.402                          | 1370.23            | 550.99             |
| A_68_P27589635 | chr11:11013930-11013974                           | NM_177033:-66     | Vwc2       | PROMOTER               | 0.58                                                         | 4.048                          | 575.79             | 2330.61            | 2.346                          | 535.50             | 1256.10            |
| A_68_P31479221 | chr18:7868637-7868681                             | NR_027465:-197    | Wac        | PROMOTER               | 0.418                                                        | 5.342                          | 747.68             | 3993.78            | 2.233                          | 666.84             | 1489.14            |
| A_68_P31479225 | chr18:7869058-7869102                             | NM_001146298:-114 | Wac        | PROMOTER               | 0.534                                                        | 7.118                          | 3456.63            | 24603.15           | 3.799                          | 2823.26            | 10726.12           |
| A_68_P31479228 | chr18:7869362-7869406                             | NM_001146298:190  | Wac        | INSIDE                 | 0.446                                                        | 3.636                          | 2819.43            | 10252.17           | 1.622                          | 2314.17            | 3753.24            |
| A_68_P31479223 | chr18:7868850-7868894                             | NM_001146298:-322 | Wac        | PROMOTER               | 0.631                                                        | 2.581                          | 1324.18            | 3417.19            | 1.63                           | 1161.22            | 1892.38            |
| A_68_P29531321 | chr14:35487082-35487126                           | NM_001004436:-9   | Wapal      | PROMOTER               | 0.595                                                        | 0.308                          | 4406.71            | 1357.11            | 0.183                          | 3008.35            | 551.13             |
| A_68_P29531324 | chr14:35487544-35487588                           | NM_001004436:453  | Wapal      | INSIDE                 | 0.232                                                        | 1.528                          | 2522.03            | 3854.20            | 0.355                          | 2180.15            | 774.43             |
| A_68_P29531317 | chr14:35486617-35486661                           | NM_001004436:-475 | Wapal      | PROMOTER               | 0.506                                                        | 0.635                          | 866.37             | 549.96             | 0.321                          | 780.40             | 250.77             |
| A_68_P22362402 | chr3:98945208-98945252                            | NM_027462:218     | Wars2      | INSIDE                 | 0.433                                                        | 0.449                          | 1100.29            | 493.62             | 0.194                          | 882.20             | 171.23             |
| A_68_P23315906 | chr4:132686467-132686511                          | NM_153423:-59     | Wasf2      | PROMOTER               | 0.45                                                         | 0.732                          | 3986.67            | 2919.21            | 0.33                           | 3125.51            | 1030.76            |
| A_68_P24168282 | chr5:147197029-147197073                          | NM_145155:469     | Wasf3      | INSIDE                 | 0.581                                                        | 0.610                          | 2292.66            | 1399.19            | 0.355                          | 1841.46            | 653.01             |
| A_68_P24302940 | chr6:24615184-24615228                            | NM_028459:-211    | Wasl       | PROMOTER               | 0.339                                                        | 6.211                          | 4818.32            | 29924.94           | 2.107                          | 4029.34            | 8489.21            |
| A_68_P24874653 | chr6:136776590-136776634                          | NM_021714:125     | Wbp11      | INSIDE                 | 0.454                                                        | 0.397                          | 2483.75            | 985.22             | 0.18                           | 1814.91            | 326.54             |
| A_68_P29751622 | chr14:79881067-79881111                           | NM_018765:-13     | Wbp4       | PROMOTER               | 0.64                                                         | 0.505                          | 1964.99            | 992.14             | 0.323                          | 1592.47            | 514.21             |
| A_68_P29751627 | chr14:79881898-79881942                           | NM_018765:-845    | Wbp4       | PROMOTER               | 0.65                                                         | 3.347                          | 880.72             | 2948.07            | 2.175                          | 926.86             | 2016.24            |
| A_68_P24111847 | chr5:134652378-134652422                          | NM_033572:237     | Wbser16    | INSIDE                 | 0.198                                                        | 1.854                          | 2299.18            | 4262.18            | 0.367                          | 1790.35            | 657.14             |
| A_68_P24097673 | chr5:131783669-131783713                          | NM_145218:-298    | Wbser17    | PROMOTER               | 0.499                                                        | 0.665                          | 1597.90            | 1062.92            | 0.332                          | 1253.76            | 416.00             |
| A_68_P20377583 | chr1:79758129-79758173                            | NM_001111279:194  | Wdfy1      | INSIDE                 | 0.604                                                        | 0.601                          | 1463.61            | 879.92             | 0.363                          | 1147.36            | 416.76             |
| A_68_P23938671 | chr5:102499208-102499252                          | NM_172882:-290    | Wdfy3      | PROMOTER               | 0.173                                                        | 14.534                         | 917.57             | 13335.85           | 2.518                          | 734.25             | 1848.83            |
| A_68_P23938669 | chr5:102498892-102498936                          | NM_172882:26      | Wdfy3      | INSIDE                 | 0.397                                                        | 0.728                          | 5028.58            | 3661.48            | 0.289                          | 3833.51            | 1106.86            |
| A_68_P22516577 | chr7:136735544-136735588                          | NM_172255:190     | Wdr11      | INSIDE                 | 0.35                                                         | 6.359                          | 1587.50            | 10094.35           | 2.227                          | 1367.20            | 3044.71            |
| A_68_P32241861 | chrX:7706354-7706398                              | NR_029428:3597    | Wdr13      | INSIDE                 | 0.634                                                        | 3.461                          | 555.13             | 1921.05            | 2.193                          | 762.62             | 1672.51            |
| A_68_P28739967 | chr12:111976055-111976099                         | NM_027149:-82     | Wdr20a     | PROMOTER               | 0.354                                                        | 7.535                          | 1485.41            | 11192.80           | 2.665                          | 1288.43            | 3433.82            |
| A_68_P28739965 | chr12:111975801-111975845                         | NM_027149:-336    | Wdr20a     | PROMOTER               | 0.437                                                        | 0.571                          | 1522.70            | 869.82             | 0.25                           | 1160.39            | 289.62             |
| A_68_P20880198 | chr1:183142413-183142457                          | NM_145514:-325    | Wdr26      | PROMOTER               | 0.327                                                        | 6.178                          | 926.12             | 5721.75            | 2.02                           | 840.62             | 1698.13            |
| A_68_P22964621 | chr4:62131699-62131744                            | NM_023597:185     | Wdr31      | INSIDE                 | 0.244                                                        | 1.513                          | 1254.33            | 1897.58            | 0.369                          | 770.68             | 284.28             |
| A_68_P31599635 | chr18:31963656-31963700                           | NM_001170966:-32  | Wdr33      | PROMOTER               | 0.513                                                        | 0.303                          | 1475.30            | 447.60             | 0.156                          | 1118.46            | 174.08             |
| A_68_P31599639 | chr18:31964071-31964115                           | NM_001170966:382  | Wdr33      | INSIDE                 | 0.326                                                        | 0.576                          | 1194.31            | 688.37             | 0.188                          | 989.24             | 185.91             |
| A_68_P21101048 | chr2:29904402-29904446                            | NM_001008498:-25  | Wdr34      | PROMOTER               | 0.184                                                        | 11.266                         | 1300.02            | 14645.92           | 2.078                          | 1068.39            | 2220.20            |
| A_68_P28225578 | chr12:8980743-8980787                             | NM_001159527:-42  | Wdr35      | PROMOTER               | 0.403                                                        | 5.805                          | 7569.68            | 43945.40           | 2.338                          | 6186.31            | 14460.89           |
| A_68_P31140217 | chr17:31649105-31649149                           | NM_021322:306     | Wdr4       | INSIDE                 | 0.405                                                        | 1.441                          | 1602.70            | 2309.36            | 0.583                          | 1264.82            | 737.56             |
| A_68_P31335312 | chr17:71965459-71965503                           | NM_175639:-74     | Wdr43      | PROMOTER               | 0.419                                                        | 0.355                          | 1462.92            | 518.90             | 0.149                          | 1233.46            | 183.24             |

| ProbeName      | Target position of probe on CpG island microarray | TargetID           | GeneSymbol | CpG island Description | Ratio of relative methylation (TiO <sub>2</sub> -NP/Vehicle) | Sham group                     |                    |                    | TiO <sub>2</sub> -H group      |                    |                    |
|----------------|---------------------------------------------------|--------------------|------------|------------------------|--------------------------------------------------------------|--------------------------------|--------------------|--------------------|--------------------------------|--------------------|--------------------|
|                |                                                   |                    |            |                        |                                                              | Relative methylation (Cy5/Cy3) | Cy3 signal (Input) | Cy5 signal (MeDIP) | Relative methylation (Cy5/Cy3) | Cy3 signal (Input) | Cy5 signal (MeDIP) |
| A_68_P28190095 | chr11:121215875-121215919                         | NM_025793:-135     | Wdr451     | PROMOTER               | 0.531                                                        | 19.509                         | 2340.27            | 45656.25           | 10.359                         | 2116.89            | 21928.48           |
| A_68_P28190096 | chr11:121215946-121215990                         | NM_025793:-207     | Wdr451     | PROMOTER               | 0.586                                                        | 0.635                          | 1829.26            | 1161.11            | 0.372                          | 1330.60            | 494.59             |
| A_68_P31151139 | chr17:34078067-34078111                           | NM_020603:421      | Wdr46      | INSIDE                 | 0.207                                                        | 0.341                          | 3799.71            | 1296.95            | 0.071                          | 2367.94            | 166.98             |
| A_68_P31151137 | chr17:34077801-34077845                           | NM_020603:155      | Wdr46      | INSIDE                 | 0.626                                                        | 0.644                          | 1487.98            | 958.75             | 0.403                          | 1153.56            | 465.27             |
| A_68_P22413525 | chr3:108394707-108394751                          | NM_181400:533      | Wdr47      | INSIDE                 | 0.424                                                        | 0.249                          | 2304.89            | 573.11             | 0.106                          | 1660.59            | 175.19             |
| A_68_P22413522 | chr3:108394356-108394400                          | NM_181400:183      | Wdr47      | INSIDE                 | 0.531                                                        | 0.647                          | 1898.17            | 1228.80            | 0.344                          | 1584.66            | 544.49             |
| A_68_P22413523 | chr3:108394473-108394517                          | NM_181400:299      | Wdr47      | INSIDE                 | 0.479                                                        | 3.528                          | 1048.81            | 3700.31            | 1.691                          | 902.24             | 1525.69            |
| A_68_P26815583 | chr9:108480765-108480809                          | NM_031392:215      | Wdr6       | INSIDE                 | 0.345                                                        | 0.462                          | 5089.97            | 2351.11            | 0.159                          | 3376.18            | 537.94             |
| A_68_P26815586 | chr9:108481063-108481107                          | NM_031392:-83      | Wdr6       | PROMOTER               | 0.397                                                        | 5.140                          | 2071.78            | 10648.06           | 2.041                          | 1604.07            | 3273.50            |
| A_68_P26815582 | chr9:108480653-108480697                          | NM_031392:327      | Wdr6       | INSIDE                 | 0.401                                                        | 1.409                          | 13201.65           | 18597.52           | 0.565                          | 8763.28            | 4952.59            |
| A_68_P29998080 | chr15:8049104-8049148                             | NM_001081402:83    | Wdr70      | INSIDE                 | 0.603                                                        | 0.711                          | 3529.05            | 2508.22            | 0.429                          | 2725.13            | 1168.87            |
| A_68_P23164318 | chr4:102786543-102786587                          | NM_146254:340      | Wdr78      | INSIDE                 | 0.284                                                        | 1.585                          | 921.57             | 1460.80            | 0.45                           | 729.85             | 328.31             |
| A_68_P23429335 | chr4:153515771-153515815                          | NM_021499:-688     | Wdr8       | DIVERGENT_PROMOTER     | 0.549                                                        | 0.260                          | 1994.20            | 519.38             | 0.143                          | 1248.83            | 178.57             |
| A_68_P26023613 | chr8:87604137-87604181                            | NM_026399:487      | Wdr83      | INSIDE                 | 0.554                                                        | 0.497                          | 2185.31            | 1085.52            | 0.275                          | 1616.52            | 444.82             |
| A_68_P26023614 | chr8:87604286-87604330                            | NM_026399:337      | Wdr83      | INSIDE                 | 0.436                                                        | 0.543                          | 853.48             | 463.61             | 0.237                          | 723.00             | 171.24             |
| A_68_P28549762 | chr12:76770236-76770280                           | NM_028203:266      | Wdr89      | INSIDE                 | 0.629                                                        | 0.229                          | 2304.01            | 526.63             | 0.144                          | 1733.11            | 249.37             |
| A_68_P32152243 | chr19:47911627-47911671                           | NM_027559:203      | Wdr96      | INSIDE                 | 0.373                                                        | 4.673                          | 2170.92            | 10143.70           | 1.741                          | 1864.07            | 3245.19            |
| A_68_P23317106 | chr4:132895104-132895148                          | NM_199306:104      | Wdte1      | INSIDE                 | 0.66                                                         | 6.305                          | 11701.67           | 73775.12           | 4.158                          | 8398.29            | 34920.00           |
| A_68_P23317102 | chr4:132894698-132894742                          | NM_199306:510      | Wdte1      | INSIDE                 | 0.259                                                        | 6.185                          | 2325.72            | 14383.71           | 1.599                          | 1875.13            | 2997.84            |
| A_68_P25411826 | chr7:117266404-117266448                          | NM_009516:854      | Wee1       | INSIDE                 | 0.575                                                        | 3.702                          | 1116.99            | 4135.61            | 2.128                          | 944.19             | 2009.28            |
| A_68_P25411827 | chr7:117266477-117266521                          | NM_009516:926      | Wee1       | INSIDE                 | 0.605                                                        | 4.146                          | 910.18             | 3773.83            | 2.51                           | 733.64             | 1841.24            |
| A_68_P23610941 | chr5:37379997-37380041                            | NM_011716:203      | Wis1       | INSIDE                 | 0.501                                                        | 4.787                          | 1509.10            | 7224.37            | 2.397                          | 1209.06            | 2898.00            |
| A_68_P25272788 | chr7:88716073-88716117                            | NM_001004185:-83   | Whamm      | DIVERGENT_PROMOTER     | 0.11                                                         | 24.435                         | 786.25             | 19212.31           | 2.678                          | 599.16             | 1604.68            |
| A_68_P22970869 | chr4:63155665-63155709                            | NM_001008791:1299  | Whm        | INSIDE                 | 0.244                                                        | 0.464                          | 3019.31            | 1401.60            | 0.113                          | 1984.72            | 224.59             |
| A_68_P22970352 | chr4:63077484-63077528                            | NM_001008797:16850 | Whrn       | INSIDE                 | 0.493                                                        | 4.527                          | 1434.69            | 6494.22            | 2.231                          | 1044.73            | 2330.30            |
| A_68_P22970873 | chr4:63156014-63156058                            | NM_001008791:949   | Whrn       | INSIDE                 | 0.371                                                        | 0.567                          | 957.02             | 542.21             | 0.21                           | 816.53             | 171.74             |
| A_68_P22970876 | chr4:63156377-63156421                            | NM_001008791:587   | Whrn       | INSIDE                 | 0.549                                                        | 0.658                          | 1037.46            | 682.36             | 0.361                          | 892.75             | 322.65             |
| A_68_P22970353 | chr4:63077625-63077669                            | NM_001008797:16710 | Whrn       | INSIDE                 | 0.42                                                         | 3.395                          | 2697.89            | 9158.23            | 1.426                          | 1801.74            | 2569.37            |
| A_68_P27543031 | chr10:128185237-128185281                         | NM_001170869:-319  | Wibg       | PROMOTER               | 0.583                                                        | 4.865                          | 306.48             | 1491.03            | 2.835                          | 260.53             | 738.52             |
| A_68_P27501021 | chr10:120471044-120471088                         | NM_011915:7        | Wif1       | INSIDE                 | 0.597                                                        | 0.570                          | 1336.61            | 762.49             | 0.341                          | 1140.69            | 388.58             |
| A_68_P28058995 | chr11:98724946-98724990                           | NM_197940:57       | Wipf2      | INSIDE                 | 0.562                                                        | 7.420                          | 785.56             | 5828.54            | 4.173                          | 737.94             | 3079.77            |
| A_68_P28119631 | chr11:109473059-109473103                         | NM_145940:-377     | Wipi1      | PROMOTER               | 0.216                                                        | 13.648                         | 11035.45           | 150616.70          | 2.945                          | 10320.41           | 30397.09           |
| A_68_P28119630 | chr11:109472954-109472998                         | NM_145940:-273     | Wipi1      | PROMOTER               | 0.401                                                        | 0.329                          | 10745.04           | 3534.95            | 0.132                          | 8000.49            | 1055.48            |
| A_68_P28119629 | chr11:109472837-109472881                         | NM_145940:-155     | Wipi1      | PROMOTER               | 0.192                                                        | 7.270                          | 5577.41            | 41103.93           | 1.418                          | 4433.13            | 6287.17            |
| A_68_P24152597 | chr5:143106025-143106069                          | NM_178398:509      | Wipi2      | INSIDE                 | 0.222                                                        | 11.227                         | 1652.99            | 18558.22           | 2.487                          | 1403.67            | 3490.67            |
| A_68_P24152591 | chr5:143105523-143105567                          | NM_178398:7        | Wipi2      | INSIDE                 | 0.489                                                        | 8.034                          | 1261.67            | 10136.29           | 3.931                          | 1076.55            | 4231.53            |
| A_68_P29023536 | chr13:49241942-49241986                           | NM_029361:1419     | Wnk2       | INSIDE                 | 0.223                                                        | 1.591                          | 1548.58            | 2463.92            | 0.354                          | 1308.62            | 463.78             |
| A_68_P28072948 | chr11:101126562-101126606                         | NM_175638:4704     | Wnk4       | INSIDE                 | 0.401                                                        | 0.679                          | 1070.03            | 726.13             | 0.272                          | 865.95             | 235.47             |
| A_68_P30476474 | chr15:98622103-98622147                           | NM_021279:1837     | Wnt1       | INSIDE                 | 0.55                                                         | 0.347                          | 2166.81            | 751.02             | 0.191                          | 1577.94            | 300.94             |
| A_68_P20350529 | chr1:74838384-74838428                            | NM_009518:-186     | Wnt10a     | PROMOTER               | 0.375                                                        | 8.378                          | 4881.71            | 40900.31           | 3.145                          | 4179.01            | 13144.18           |
| A_68_P20350627 | chr1:74849814-74849858                            | NM_009518:11244    | Wnt10a     | INSIDE                 | 0.588                                                        | 6.354                          | 3596.33            | 22850.01           | 3.739                          | 2878.67            | 10762.00           |
| A_68_P20350626 | chr1:74849701-74849745                            | NM_009518:11130    | Wnt10a     | INSIDE                 | 0.498                                                        | 0.588                          | 1136.07            | 667.63             | 0.293                          | 870.37             | 254.67             |
| A_68_P22394252 | chr3:104770874-104770918                          | NM_009520:-6269    | Wnt2b      | PROMOTER               | 0.584                                                        | 4.240                          | 1528.40            | 6480.49            | 2.477                          | 1285.17            | 3183.53            |
| A_68_P28087051 | chr11:103634875-103634919                         | NM_009521:-592     | Wnt3       | PROMOTER               | 0.372                                                        | 5.191                          | 2340.70            | 12151.38           | 1.93                           | 1972.33            | 3806.04            |
| A_68_P28087058 | chr11:103635743-103635787                         | NM_009521:276      | Wnt3       | INSIDE                 | 0.525                                                        | 0.573                          | 2978.55            | 1706.93            | 0.301                          | 1963.40            | 591.06             |
| A_68_P28087325 | chr11:103671166-103671210                         | NM_009521:35700    | Wnt3       | INSIDE                 | 0.644                                                        | 4.443                          | 1423.09            | 6323.34            | 2.861                          | 1176.17            | 3365.44            |

| ProbeName      | Target position of probe on CpG island microarray | TargetID           | GeneSymbol | CpG island Description | Ratio of relative methylation (TiO <sub>2</sub> -NP/Vehicle) | Sham group                     |                    |                    | TiO <sub>2</sub> -H group      |                    |                    |
|----------------|---------------------------------------------------|--------------------|------------|------------------------|--------------------------------------------------------------|--------------------------------|--------------------|--------------------|--------------------------------|--------------------|--------------------|
|                |                                                   |                    |            |                        |                                                              | Relative methylation (Cy5/Cy3) | Cy3 signal (Input) | Cy5 signal (MeDIP) | Relative methylation (Cy5/Cy3) | Cy3 signal (Input) | Cy5 signal (MeDIP) |
| A_68_P28087340 | chr11:103672887-103672931                         | NM_009521:37420    | Wnt3       | INSIDE                 | 0.37                                                         | 1.535                          | 5185.16            | 7958.48            | 0.568                          | 3846.16            | 2184.98            |
| A_68_P27836016 | chr11:59102534-59102578                           | NM_009522:1697     | Wnt3a      | INSIDE                 | 0.427                                                        | 5.467                          | 676.52             | 3698.70            | 2.336                          | 600.87             | 1403.78            |
| A_68_P27836028 | chr11:59103858-59103902                           | NM_009522:373      | Wnt3a      | INSIDE                 | 0.45                                                         | 5.035                          | 1402.31            | 7060.71            | 2.265                          | 1114.32            | 2524.12            |
| A_68_P27835858 | chr11:59077515-59077559                           | NM_009522:26717    | Wnt3a      | INSIDE                 | 0.551                                                        | 3.726                          | 2440.13            | 9090.96            | 2.054                          | 2067.24            | 4245.55            |
| A_68_P27836018 | chr11:59102804-59102848                           | NM_009522:1427     | Wnt3a      | INSIDE                 | 0.531                                                        | 3.068                          | 3276.09            | 10050.35           | 1.629                          | 2678.94            | 4363.13            |
| A_68_P23339116 | chr4:136852284-136852328                          | NM_009523:18757    | Wnt4       | INSIDE                 | 0.242                                                        | 8.064                          | 2043.81            | 16480.33           | 1.95                           | 1532.91            | 2989.55            |
| A_68_P29493847 | chr14:29318173-29318217                           | NM_009524:-464     | Wnt5a      | PROMOTER               | 0.547                                                        | 5.930                          | 378.48             | 2244.33            | 3.241                          | 317.23             | 1028.24            |
| A_68_P29493853 | chr14:29318903-29318947                           | NM_009524:266      | Wnt5a      | INSIDE                 | 0.564                                                        | 0.470                          | 1668.73            | 783.61             | 0.265                          | 1221.18            | 323.20             |
| A_68_P24793727 | chr6:119494261-119494305                          | NM_009525:83       | Wnt5b      | INSIDE                 | 0.601                                                        | 3.335                          | 699.84             | 2333.71            | 2.005                          | 624.46             | 1252.13            |
| A_68_P20350376 | chr1:74818349-74818393                            | NM_009526:-95      | Wnt6       | PROMOTER               | 0.363                                                        | 4.412                          | 3721.32            | 16418.52           | 1.6                            | 3141.85            | 5027.64            |
| A_68_P24638868 | chr6:91361534-91361578                            | NM_009527:-193     | Wnt7a      | PROMOTER               | 0.022                                                        | 127.907                        | 1809.64            | 231465.70          | 2.863                          | 1680.91            | 4812.19            |
| A_68_P24638863 | chr6:91360911-91360955                            | NM_009527:431      | Wnt7a      | INSIDE                 | 0.571                                                        | 3.842                          | 1568.17            | 6025.34            | 2.192                          | 1334.11            | 2924.93            |
| A_68_P30401591 | chr15:85408071-85408115                           | NM_001163634:408   | Wnt7b      | INSIDE                 | 0.653                                                        | 2.469                          | 814.19             | 2010.24            | 1.613                          | 719.26             | 1159.83            |
| A_68_P28086889 | chr11:103611261-103611305                         | NM_011719:-147     | Wnt9b      | PROMOTER               | 0.243                                                        | 10.527                         | 936.16             | 9854.61            | 2.562                          | 947.30             | 2427.14            |
| A_68_P28086886 | chr11:103610912-103610956                         | NM_011719:201      | Wnt9b      | INSIDE                 | 0.653                                                        | 0.488                          | 1610.49            | 785.77             | 0.319                          | 1379.32            | 439.56             |
| A_68_P28931383 | chr13:32894479-32894523                           | NM_030215:602      | Wrip1      | INSIDE                 | 0.252                                                        | 11.611                         | 1751.88            | 20341.37           | 2.931                          | 1455.46            | 4266.13            |
| A_68_P28931384 | chr13:32894661-32894705                           | NM_030215:784      | Wrip1      | INSIDE                 | 0.605                                                        | 7.417                          | 1628.39            | 12078.28           | 4.485                          | 1329.27            | 5961.32            |
| A_68_P28931385 | chr13:32894778-32894822                           | NM_030215:902      | Wrip1      | INSIDE                 | 0.65                                                         | 0.541                          | 1334.45            | 721.90             | 0.351                          | 990.75             | 348.12             |
| A_68_P27907296 | chr11:71564250-71564294                           | NM_177618:68       | Wscd1      | INSIDE                 | 0.443                                                        | 9.144                          | 4220.52            | 38591.95           | 4.047                          | 3527.84            | 14278.89           |
| A_68_P27907301 | chr11:71564787-71564831                           | NM_177618:604      | Wscd1      | INSIDE                 | 0.262                                                        | 6.593                          | 1212.15            | 7991.98            | 1.729                          | 1053.46            | 1821.54            |
| A_68_P21492621 | chr2:104966817-104966861                          | NM_144783:153      | Wt1        | INSIDE                 | 0.348                                                        | 11.179                         | 8166.27            | 91293.24           | 3.889                          | 7275.83            | 28292.98           |
| A_68_P31054977 | chr17:13185351-13185395                           | NM_001113533:-247  | Wtap       | PROMOTER               | 0.398                                                        | 6.084                          | 1000.88            | 6089.31            | 2.419                          | 947.67             | 2292.62            |
| A_68_P27709779 | chr11:35793475-35793519                           | NM_170779:95       | Wwe1       | INSIDE                 | 0.464                                                        | 0.734                          | 1753.17            | 1286.47            | 0.341                          | 1274.85            | 434.15             |
| A_68_P25844867 | chr8:49075341-49075385                            | NM_133791:543      | Wwe2       | INSIDE                 | 0.295                                                        | 14.564                         | 3575.04            | 52065.85           | 4.292                          | 3948.66            | 16948.62           |
| A_68_P25844872 | chr8:49076065-49076109                            | NM_133791:-181     | Wwe2       | PROMOTER               | 0.431                                                        | 6.787                          | 3714.95            | 25214.01           | 2.924                          | 3213.68            | 9395.34            |
| A_68_P22766407 | chr4:19635843-19635887                            | NM_177327:276      | Wwp1       | INSIDE                 | 0.446                                                        | 0.553                          | 1627.85            | 900.16             | 0.247                          | 1447.23            | 356.79             |
| A_68_P22766408 | chr4:19636033-19636077                            | NM_177327:86       | Wwp1       | INSIDE                 | 0.448                                                        | 6.671                          | 1591.26            | 10615.58           | 2.987                          | 1458.50            | 4356.67            |
| A_68_P22164435 | chr3:57379593-57379637                            | NM_133784:184      | Wwtr1      | INSIDE                 | 0.401                                                        | 0.397                          | 1308.74            | 519.81             | 0.159                          | 1061.90            | 169.05             |
| A_68_P22164439 | chr3:57380171-57380215                            | NM_001168281:-360  | Wwtr1      | PROMOTER               | 0.509                                                        | 0.476                          | 1156.64            | 550.58             | 0.242                          | 944.24             | 2928.96            |
| A_68_P32340723 | chrX:39421307-39421351                            | NM_009688:316      | Xiap       | INSIDE                 | 0.231                                                        | 12.851                         | 1713.78            | 22024.00           | 2.971                          | 2236.71            | 6645.29            |
| A_68_P26875613 | chr9:119920587-119920631                          | NM_011724:12108    | Xirp1      | DOWNSTREAM             | 0.349                                                        | 5.578                          | 2730.75            | 15230.90           | 1.949                          | 2439.09            | 4753.46            |
| A_68_P32573118 | chrX:100677473-100677517                          | NR_001463:1078     | Xist       | INSIDE                 | 0.483                                                        | 4.529                          | 1685.95            | 7635.19            | 2.189                          | 2219.48            | 4857.73            |
| A_68_P32573117 | chrX:100677336-100677380                          | NR_001463:1214     | Xist       | INSIDE                 | 0.394                                                        | 4.157                          | 2538.89            | 10555.06           | 1.638                          | 3070.32            | 5028.57            |
| A_68_P20002764 | chr1:3660776-3660820                              | NM_001011874:781   | Xkr4       | INSIDE                 | 0.408                                                        | 0.511                          | 1071.55            | 547.94             | 0.208                          | 886.61             | 184.80             |
| A_68_P29662310 | chr14:64225813-64225857                           | NM_173393:468      | Xkr6       | INSIDE                 | 0.615                                                        | 0.312                          | 3067.00            | 955.64             | 0.192                          | 2308.69            | 442.40             |
| A_68_P21752521 | chr2:152857720-152857764                          | NM_001011732:155   | Xkr7       | INSIDE                 | 0.304                                                        | 13.817                         | 3341.98            | 46175.58           | 4.194                          | 2910.81            | 12208.10           |
| A_68_P21752666 | chr2:152880620-152880664                          | NM_001011732:23055 | Xkr7       | INSIDE                 | 0.472                                                        | 6.356                          | 1801.47            | 11449.75           | 3.003                          | 1605.59            | 4820.97            |
| A_68_P27644767 | chr11:23156427-23156471                           | NM_001035226:408   | Xpo1       | INSIDE                 | 0.633                                                        | 4.712                          | 433.65             | 2043.36            | 2.983                          | 346.05             | 1032.20            |
| A_68_P27644759 | chr11:23155418-23155462                           | NM_001035226:-600  | Xpo1       | PROMOTER               | 0.405                                                        | 4.238                          | 1251.56            | 5303.65            | 1.718                          | 1027.19            | 1764.36            |
| A_68_P25499304 | chr7:133344026-133344070                          | NM_028816:-126     | Xpo6       | PROMOTER               | 0.628                                                        | 37.151                         | 6173.64            | 229358.10          | 23.32                          | 6848.80            | 159715.30          |
| A_68_P25499303 | chr7:133343931-133343975                          | NM_028816:-30      | Xpo6       | PROMOTER               | 0.648                                                        | 3.149                          | 1643.56            | 5175.00            | 2.042                          | 1432.71            | 2925.04            |
| A_68_P29703309 | chr14:71165897-71165941                           | NM_023045:517      | Xpo7       | INSIDE                 | 0.569                                                        | 0.396                          | 5015.39            | 1987.01            | 0.225                          | 3665.86            | 826.55             |
| A_68_P27504467 | chr10:121043954-121043999                         | NM_001081056:19396 | Xpot       | INSIDE                 | 0.313                                                        | 6.640                          | 1770.72            | 11756.74           | 2.078                          | 1292.70            | 2686.19            |
| A_68_P20737711 | chr1:157264084-157264128                          | NM_011273:468      | Xpr1       | INSIDE                 | 0.327                                                        | 6.735                          | 1520.11            | 10237.20           | 2.202                          | 1239.20            | 2729.21            |
| A_68_P20737716 | chr1:157264675-157264719                          | NM_011273:-122     | Xpr1       | PROMOTER               | 0.36                                                         | 5.717                          | 1556.49            | 8897.86            | 2.059                          | 1326.53            | 2731.43            |
| A_68_P20737714 | chr1:157264468-157264512                          | NM_011273:84       | Xpr1       | INSIDE                 | 0.456                                                        | 9.356                          | 10743.13           | 100514.30          | 4.265                          | 8556.76            | 36492.69           |

| ProbeName      | Target position of probe on CpG island microarray | TargetID          | GeneSymbol | CpG island Description | Ratio of relative methylation (TiO <sub>2</sub> -NP/Vehicle) | Sham group                     |                    |                    | TiO <sub>2</sub> -H group      |                    |                    |
|----------------|---------------------------------------------------|-------------------|------------|------------------------|--------------------------------------------------------------|--------------------------------|--------------------|--------------------|--------------------------------|--------------------|--------------------|
|                |                                                   |                   |            |                        |                                                              | Relative methylation (Cy5/Cy3) | Cy3 signal (Input) | Cy5 signal (MeDIP) | Relative methylation (Cy5/Cy3) | Cy3 signal (Input) | Cy5 signal (MeDIP) |
| A_68_P20737715 | chr1:157264567-157264611                          | NM_011273:-14     | Xpr1       | PROMOTER               | 0.62                                                         | 2.675                          | 1802.36            | 4820.78            | 1.659                          | 1416.57            | 2349.84            |
| A_68_P25005464 | chr7:25332066-25332110                            | NM_009532:-80     | Xrcc1      | DIVERGENT_PROMOTER     | 0.252                                                        | 13.265                         | 2086.45            | 27677.00           | 3.345                          | 1555.16            | 5201.66            |
| A_68_P28746254 | chr12:113052004-113052048                         | NM_028875:26      | Xrcc3      | INSIDE                 | 0.593                                                        | 0.223                          | 4240.97            | 945.46             | 0.132                          | 3037.69            | 401.37             |
| A_68_P27532842 | chr10:126338342-126338386                         | NM_026858:63      | Xrcc6bp1   | INSIDE                 | 0.624                                                        | 6.772                          | 3111.90            | 21073.50           | 4.227                          | 2593.86            | 10962.95           |
| A_68_P21721815 | chr2:146838797-146838841                          | NM_011917:23      | Xrn2       | INSIDE                 | 0.66                                                         | 2.462                          | 2032.46            | 5003.02            | 1.626                          | 1723.13            | 2801.38            |
| A_68_P26871926 | chr9:119266492-119266536                          | NM_001033209:16   | Xylb       | INSIDE                 | 0.617                                                        | 0.605                          | 1842.76            | 1115.11            | 0.374                          | 1325.42            | 495.09             |
| A_68_P28034316 | chr11:94538398-94538442                           | NM_145828:387     | Xylt2      | INSIDE                 | 0.373                                                        | 4.621                          | 1984.57            | 9170.79            | 1.723                          | 1653.50            | 2849.64            |
| A_68_P30446389 | chr15:93167185-93167229                           | NM_024189:160     | Yaf2       | INSIDE                 | 0.614                                                        | 4.981                          | 787.78             | 3923.84            | 3.058                          | 698.95             | 2137.42            |
| A_68_P30446395 | chr15:93167839-93167883                           | NM_024189:-494    | Yaf2       | PROMOTER               | 0.512                                                        | 0.630                          | 1392.46            | 877.35             | 0.322                          | 1049.12            | 338.34             |
| A_68_P26290455 | chr9:8003868-8003912                              | NM_001171147:706  | Yap1       | INSIDE                 | 0.119                                                        | 0.580                          | 4279.99            | 2480.28            | 0.069                          | 3014.92            | 208.43             |
| A_68_P26290461 | chr9:8004643-8004687                              | NM_001171147:-68  | Yap1       | PROMOTER               | 0.456                                                        | 13.274                         | 3997.64            | 53063.55           | 6.05                           | 3697.92            | 22371.76           |
| A_68_P23295442 | chr4:128867260-128867304                          | NM_134151:244     | Yars       | INSIDE                 | 0.476                                                        | 0.304                          | 3726.64            | 1132.74            | 0.145                          | 2577.90            | 372.99             |
| A_68_P23295439 | chr4:128866891-128866935                          | NM_134151:-126    | Yars       | DIVERGENT_PROMOTER     | 0.482                                                        | 0.564                          | 1918.86            | 1082.58            | 0.272                          | 1499.91            | 407.94             |
| A_68_P23244790 | chr4:118967092-118967136                          | NM_011732:4       | Ybx1       | INSIDE                 | 0.351                                                        | 4.761                          | 3996.26            | 19028.16           | 1.672                          | 3153.34            | 5273.34            |
| A_68_P23244789 | chr4:118966777-118966821                          | NM_011732:320     | Ybx1       | INSIDE                 | 0.591                                                        | 8.279                          | 1654.08            | 13693.95           | 4.894                          | 1526.68            | 7471.33            |
| A_68_P23244791 | chr4:118967175-118967219                          | NM_011732:-78     | Ybx1       | PROMOTER               | 0.651                                                        | 0.199                          | 7723.78            | 1538.23            | 0.13                           | 4873.79            | 631.57             |
| A_68_P23244786 | chr4:118966226-118966270                          | NM_011732:870     | Ybx1       | INSIDE                 | 0.423                                                        | 0.515                          | 986.12             | 507.54             | 0.218                          | 818.69             | 178.27             |
| A_68_P27898025 | chr11:69749877-69749926                           | NM_016875:501     | Ybx2       | INSIDE                 | 0.554                                                        | 0.421                          | 2058.08            | 867.16             | 0.234                          | 1532.56            | 357.94             |
| A_68_P23189866 | chr4:106987036-106987080                          | NM_001205156:91   | Yipf1      | INSIDE                 | 0.636                                                        | 0.562                          | 979.75             | 550.87             | 0.358                          | 806.61             | 288.62             |
| A_68_P31644533 | chr18:40378844-40378888                           | NM_023311:187     | Yipf5      | INSIDE                 | 0.349                                                        | 0.395                          | 12578.36           | 4970.76            | 0.138                          | 7341.75            | 1012.71            |
| A_68_P31644534 | chr18:40378957-40379001                           | NM_023311:75      | Yipf5      | INSIDE                 | 0.548                                                        | 0.439                          | 3724.92            | 1634.89            | 0.241                          | 2603.82            | 626.34             |
| A_68_P31644532 | chr18:40378757-40378801                           | NM_023311:275     | Yipf5      | INSIDE                 | 0.586                                                        | 0.525                          | 6449.68            | 3383.27            | 0.308                          | 4086.89            | 1257.06            |
| A_68_P31644535 | chr18:40379053-40379097                           | NM_023311:-21     | Yipf5      | PROMOTER               | 0.339                                                        | 1.485                          | 1966.22            | 2920.69            | 0.503                          | 1606.03            | 807.55             |
| A_68_P27565810 | chr11:5855603-5855647                             | NM_019661:-136    | Ykt6       | DIVERGENT_PROMOTER     | 0.327                                                        | 0.708                          | 1197.77            | 847.82             | 0.231                          | 1079.51            | 249.77             |
| A_68_P20611349 | chr1:132613579-132613625                          | NM_178691:-301    | Yod1       | DIVERGENT_PROMOTER     | 0.656                                                        | 4.171                          | 475.98             | 1985.07            | 2.735                          | 389.80             | 1066.15            |
| A_68_P30571778 | chr16:17070255-17070299                           | NM_023249:-127    | Ypel1      | PROMOTER               | 0.371                                                        | 4.086                          | 3880.56            | 15855.81           | 1.518                          | 4572.45            | 6940.11            |
| A_68_P27992049 | chr11:86807064-86807108                           | NM_001005341:178  | Ypel2      | INSIDE                 | 0.434                                                        | 0.500                          | 1002.37            | 501.62             | 0.217                          | 888.74             | 193.19             |
| A_68_P23865420 | chr5:87233089-87233133                            | NM_177680:-404    | Ythdc1     | PROMOTER               | 0.435                                                        | 3.537                          | 1794.78            | 6348.61            | 1.538                          | 1448.30            | 2227.88            |
| A_68_P31669249 | chr18:44988742-44988786                           | NM_001163013:446  | Ythdc2     | INSIDE                 | 0.546                                                        | 0.287                          | 1637.61            | 469.22             | 0.156                          | 1106.09            | 172.92             |
| A_68_P23310689 | chr4:131767916-131767960                          | NM_145393:233     | Ythdf2     | INSIDE                 | 0.269                                                        | 18.893                         | 7431.48            | 140401.90          | 5.079                          | 6305.15            | 32026.80           |
| A_68_P21962515 | chr3:16083047-16083091                            | NM_001145919:-114 | Ythdf3     | PROMOTER               | 0.466                                                        | 0.468                          | 1251.31            | 585.31             | 0.218                          | 967.96             | 211.04             |
| A_68_P21962516 | chr3:16083176-16083220                            | NM_001145919:16   | Ythdf3     | INSIDE                 | 0.169                                                        | 3.169                          | 1760.89            | 5579.49            | 0.535                          | 1390.62            | 744.13             |
| A_68_P21962520 | chr3:16083485-16083529                            | NM_001145919:324  | Ythdf3     | INSIDE                 | 0.483                                                        | 0.693                          | 1104.33            | 765.71             | 0.335                          | 754.23             | 252.37             |
| A_68_P21815513 | chr2:163821038-163821082                          | NM_018753:128     | Ywhab      | INSIDE                 | 0.651                                                        | 0.367                          | 1585.32            | 582.32             | 0.239                          | 1377.55            | 329.17             |
| A_68_P27927819 | chr11:75547027-75547071                           | NM_009536:660     | Ywhae      | INSIDE                 | 0.612                                                        | 0.186                          | 5096.88            | 948.39             | 0.114                          | 3829.26            | 436.15             |
| A_68_P24118624 | chr5:136409884-136409928                          | NM_018871:605     | Ywhag      | INSIDE                 | 0.551                                                        | 0.674                          | 3636.60            | 2450.64            | 0.371                          | 2721.07            | 1010.88            |
| A_68_P23586715 | chr5:33361518-33361562                            | NM_011738:76      | Ywhah      | INSIDE                 | 0.173                                                        | 10.863                         | 609.77             | 6624.19            | 1.878                          | 519.15             | 974.71             |
| A_68_P30140505 | chr15:36723538-36723582                           | NM_011740:733     | Ywhaz      | INSIDE                 | 0.328                                                        | 6.634                          | 2028.35            | 13456.22           | 2.173                          | 1919.78            | 4171.96            |
| A_68_P28729922 | chr12:110031214-110031258                         | NM_009537:-284    | Yy1        | PROMOTER               | 0.541                                                        | 0.499                          | 3334.54            | 1665.13            | 0.27                           | 2401.53            | 648.81             |
| A_68_P28729930 | chr12:110032477-110032521                         | NM_009537:978     | Yy1        | INSIDE                 | 0.644                                                        | 2.855                          | 1236.34            | 3529.54            | 1.84                           | 1091.73            | 2008.52            |
| A_68_P31886142 | chr18:84261746-84261790                           | NM_146090:4219    | Zadl2      | INSIDE                 | 0.573                                                        | 0.464                          | 979.87             | 454.54             | 0.266                          | 758.60             | 201.67             |
| A_68_P23792610 | chr5:72971627-72971672                            | NM_174877:674     | Zar1       | INSIDE                 | 0.629                                                        | 2.495                          | 2106.55            | 5256.23            | 1.569                          | 1798.33            | 2821.68            |
| A_68_P30421089 | chr15:88581968-88582012                           | NM_181412:-150    | Zbed4      | PROMOTER               | 0.551                                                        | 5.606                          | 1024.65            | 5744.38            | 3.092                          | 866.09             | 2677.64            |
| A_68_P28553596 | chr12:77471058-77471102                           | NM_178744:-172    | Zbtb1      | DIVERGENT_PROMOTER     | 0.542                                                        | 0.447                          | 2470.84            | 1105.66            | 0.243                          | 1833.29            | 444.74             |
| A_68_P21936419 | chr3:9251754-9251798                              | NM_177660:1210    | Zbtb10     | INSIDE                 | 0.412                                                        | 5.161                          | 5514.32            | 28459.85           | 2.127                          | 5033.87            | 10707.83           |
| A_68_P21936415 | chr3:9251283-9251327                              | NM_177660:738     | Zbtb10     | INSIDE                 | 0.452                                                        | 7.899                          | 1047.66            | 8275.47            | 3.567                          | 858.80             | 3063.58            |

| ProbeName      | Target position of probe on CpG island microarray | TargetID          | GeneSymbol | CpG island Description | Ratio of relative methylation (TiO <sub>2</sub> -NP/Vehicle) | Sham group                     |                    |                    | TiO <sub>2</sub> -H group      |                    |                    |
|----------------|---------------------------------------------------|-------------------|------------|------------------------|--------------------------------------------------------------|--------------------------------|--------------------|--------------------|--------------------------------|--------------------|--------------------|
|                |                                                   |                   |            |                        |                                                              | Relative methylation (Cy5/Cy3) | Cy3 signal (Input) | Cy5 signal (MeDIP) | Relative methylation (Cy5/Cy3) | Cy3 signal (Input) | Cy5 signal (MeDIP) |
| A_68_P21936418 | chr3:9251625-9251669                              | NM_177660:1080    | Zbtb10     | INSIDE                 | 0.51                                                         | 0.626                          | 4811.89            | 3013.40            | 0.319                          | 3633.06            | 1159.38            |
| A_68_P26494151 | chr9:48644017-48644061                            | NM_001033324:12   | Zbtb16     | INSIDE                 | 0.178                                                        | 10.225                         | 2135.94            | 21839.73           | 1.822                          | 1895.43            | 3454.02            |
| A_68_P26494153 | chr9:48644221-48644265                            | NM_001033324:-192 | Zbtb16     | PROMOTER               | 0.33                                                         | 0.567                          | 4912.39            | 2785.64            | 0.187                          | 3560.34            | 666.55             |
| A_68_P26494143 | chr9:48643240-48643284                            | NM_001033324:788  | Zbtb16     | INSIDE                 | 0.467                                                        | 13.161                         | 2092.41            | 27538.51           | 6.143                          | 1791.48            | 11004.45           |
| A_68_P23364088 | chr4:141001073-141001117                          | NM_009541:507     | Zbtb17     | INSIDE                 | 0.63                                                         | 0.727                          | 4891.49            | 3554.15            | 0.458                          | 3585.11            | 1640.41            |
| A_68_P31150957 | chr17:34053104-34053148                           | NM_020625:6       | Zbtb22     | INSIDE                 | 0.639                                                        | 7.579                          | 10250.51           | 77688.67           | 4.842                          | 9088.49            | 44010.86           |
| A_68_P27089285 | chr10:41170167-41170211                           | NM_153398:-13     | Zbtb24     | PROMOTER               | 0.49                                                         | 0.587                          | 1730.74            | 1015.21            | 0.287                          | 1318.49            | 378.97             |
| A_68_P28553591 | chr12:77470382-77470426                           | NM_001172104:47   | Zbtb25     | INSIDE                 | 0.642                                                        | 3.424                          | 1190.91            | 4077.48            | 2.199                          | 1068.76            | 2349.71            |
| A_68_P28553588 | chr12:77470008-77470052                           | NM_001172104:421  | Zbtb25     | INSIDE                 | 0.534                                                        | 2.848                          | 1239.06            | 3528.73            | 1.521                          | 1159.28            | 1762.99            |
| A_68_P32326603 | chrX:35543022-35543066                            | NM_001079513:75   | Zbtb33     | INSIDE                 | 0.251                                                        | 12.365                         | 664.66             | 8218.42            | 3.103                          | 847.57             | 2630.18            |
| A_68_P32326600 | chrX:35542695-35542742                            | NM_001079513:-251 | Zbtb33     | PROMOTER               | 0.466                                                        | 4.951                          | 338.18             | 1674.24            | 2.309                          | 490.07             | 1131.43            |
| A_68_P20769689 | chr1:162964733-162964777                          | NM_173424:-364    | Zbtb37     | DIVERGENT_PROMOTER     | 0.42                                                         | 0.498                          | 3120.28            | 1555.22            | 0.209                          | 2443.89            | 511.00             |
| A_68_P27896951 | chr11:69579684-69579728                           | NM_029348:293     | Zbtb4      | INSIDE                 | 0.183                                                        | 33.874                         | 764.61             | 25900.01           | 6.209                          | 804.48             | 4994.92            |
| A_68_P27896952 | chr11:69579759-69579803                           | NM_029348:367     | Zbtb4      | INSIDE                 | 0.487                                                        | 0.348                          | 1387.90            | 482.58             | 0.169                          | 1011.70            | 171.47             |
| A_68_P27896956 | chr11:69580125-69580169                           | NM_029348:733     | Zbtb4      | INSIDE                 | 0.566                                                        | 0.530                          | 1328.27            | 703.39             | 0.3                            | 1081.72            | 323.99             |
| A_68_P23337642 | chr4:136604574-136604621                          | NM_198248:13      | Zbtb40     | INSIDE                 | 0.515                                                        | 0.530                          | 1200.55            | 635.99             | 0.273                          | 860.94             | 234.82             |
| A_68_P28751782 | chr12:113917645-113917689                         | NM_001100460:616  | Zbtb42     | INSIDE                 | 0.601                                                        | 0.562                          | 2356.14            | 1325.08            | 0.338                          | 1712.57            | 578.84             |
| A_68_P28751775 | chr12:113916856-113916901                         | NM_001100460:-172 | Zbtb42     | DIVERGENT_PROMOTER     | 0.659                                                        | 2.423                          | 1124.74            | 2724.88            | 1.596                          | 911.01             | 1453.67            |
| A_68_P28751778 | chr12:113917322-113917366                         | NM_001100460:294  | Zbtb42     | INSIDE                 | 0.526                                                        | 3.320                          | 567.05             | 1882.44            | 1.745                          | 583.20             | 1017.64            |
| A_68_P21121774 | chr2:33323833-33323877                            | NM_001025594:198  | Zbtb43     | INSIDE                 | 0.488                                                        | 4.099                          | 2033.48            | 8335.69            | 2                              | 1737.98            | 3476.41            |
| A_68_P26398232 | chr9:30838076-30838120                            | NM_001115130:-130 | Zbtb44     | PROMOTER               | 0.284                                                        | 14.281                         | 4552.42            | 65015.08           | 4.055                          | 4696.97            | 19047.91           |
| A_68_P24974109 | chr7:13593102-13593146                            | NM_001024699:2025 | Zbtb45     | INSIDE                 | 0.13                                                         | 19.198                         | 1225.05            | 23519.13           | 2.496                          | 1242.95            | 3102.73            |
| A_68_P24974110 | chr7:13593210-13593254                            | NM_001024699:1917 | Zbtb45     | INSIDE                 | 0.555                                                        | 2.756                          | 2989.28            | 8239.68            | 1.53                           | 2417.82            | 3699.58            |
| A_68_P21910759 | chr2:181195175-181195219                          | NM_028125:-1065   | Zbtb46     | PROMOTER               | 0.258                                                        | 0.509                          | 1963.59            | 999.44             | 0.131                          | 1393.02            | 182.83             |
| A_68_P22880598 | chr4:45025167-45025211                            | NM_001163283:96   | Zbtb5      | INSIDE                 | 0.106                                                        | 22.987                         | 843.74             | 19394.94           | 2.426                          | 668.90             | 1623.00            |
| A_68_P22880600 | chr4:45025359-45025403                            | NM_001163283:-96  | Zbtb5      | DIVERGENT_PROMOTER     | 0.437                                                        | 0.618                          | 755.55             | 466.83             | 0.27                           | 650.65             | 175.57             |
| A_68_P27287713 | chr10:80611280-80611324                           | NM_010731:12287   | Zbtb7a     | INSIDE                 | 0.158                                                        | 10.609                         | 4036.57            | 42825.63           | 1.674                          | 3077.26            | 5150.63            |
| A_68_P27287617 | chr10:80598897-80598941                           | NM_010731:-97     | Zbtb7a     | PROMOTER               | 0.201                                                        | 13.495                         | 1633.06            | 22037.63           | 2.718                          | 1392.77            | 3784.91            |
| A_68_P27287631 | chr10:80600637-80600681                           | NM_010731:1643    | Zbtb7a     | INSIDE                 | 0.268                                                        | 8.189                          | 2301.25            | 18845.33           | 2.191                          | 2011.20            | 4405.99            |
| A_68_P27287609 | chr10:80598116-80598160                           | NM_010731:-877    | Zbtb7a     | PROMOTER               | 0.455                                                        | 0.334                          | 1684.92            | 563.50             | 0.152                          | 1147.05            | 174.56             |
| A_68_P27287712 | chr10:80611089-80611133                           | NM_010731:12095   | Zbtb7a     | INSIDE                 | 0.553                                                        | 6.117                          | 1575.42            | 9636.18            | 3.382                          | 1525.95            | 5160.37            |
| A_68_P27287686 | chr10:80607070-80607114                           | NM_010731:8077    | Zbtb7a     | INSIDE                 | 0.577                                                        | 3.747                          | 1828.70            | 6851.41            | 2.161                          | 1355.36            | 2928.99            |
| A_68_P27287625 | chr10:80599890-80599934                           | NM_010731:897     | Zbtb7a     | INSIDE                 | 0.644                                                        | 0.482                          | 2797.79            | 1349.20            | 0.311                          | 2035.18            | 631.94             |
| A_68_P27287610 | chr10:80598190-80598234                           | NM_010731:-803    | Zbtb7a     | PROMOTER               | 0.605                                                        | 0.708                          | 2307.02            | 1632.27            | 0.428                          | 1556.31            | 666.41             |
| A_68_P27287714 | chr10:80611346-80611390                           | NM_010731:12353   | Zbtb7a     | INSIDE                 | 0.189                                                        | 7.971                          | 1575.86            | 12561.40           | 1.509                          | 1135.97            | 1714.50            |
| A_68_P22319131 | chr3:89200123-89200167                            | NM_009565:-3019   | Zbtb7b     | PROMOTER               | 0.115                                                        | 15.403                         | 3466.80            | 53397.43           | 1.764                          | 2884.93            | 5089.04            |
| A_68_P22319099 | chr3:89196394-89196438                            | NM_009565:709     | Zbtb7b     | INSIDE                 | 0.53                                                         | 0.386                          | 1477.56            | 570.24             | 0.205                          | 1038.90            | 212.56             |
| A_68_P22319094 | chr3:89195751-89195795                            | NM_009565:1353    | Zbtb7b     | INSIDE                 | 0.574                                                        | 0.541                          | 1519.82            | 821.53             | 0.31                           | 1218.24            | 378.03             |
| A_68_P31839435 | chr18:75979484-75979528                           | NM_145356:-325    | Zbtb7c     | PROMOTER               | 0.253                                                        | 11.475                         | 2547.03            | 29225.94           | 2.905                          | 2074.82            | 6026.34            |
| A_68_P31839436 | chr18:75979559-75979603                           | NM_145356:-251    | Zbtb7c     | PROMOTER               | 0.525                                                        | 6.033                          | 1442.38            | 8701.42            | 3.166                          | 1254.22            | 3970.50            |
| A_68_P31839441 | chr18:75980377-75980421                           | NM_145356:567     | Zbtb7c     | INSIDE                 | 0.65                                                         | 3.739                          | 973.02             | 3637.92            | 2.43                           | 890.25             | 2163.59            |
| A_68_P31113562 | chr17:27109927-27109971                           | NM_001005916:-175 | Zbtb9      | PROMOTER               | 0.567                                                        | 0.473                          | 1367.80            | 646.85             | 0.268                          | 1192.89            | 319.67             |
| A_68_P31113563 | chr17:27110040-27110084                           | NM_001005916:-61  | Zbtb9      | PROMOTER               | 0.5                                                          | 0.584                          | 874.77             | 511.28             | 0.292                          | 747.05             | 218.30             |
| A_68_P31113564 | chr17:27110129-27110173                           | NM_001005916:27   | Zbtb9      | INSIDE                 | 0.193                                                        | 1.671                          | 560.70             | 936.97             | 0.322                          | 518.55             | 167.00             |
| A_68_P27541965 | chr10:127984764-127984808                         | NM_134003:14      | Zc3h10     | INSIDE                 | 0.616                                                        | 2.392                          | 2345.64            | 5610.15            | 1.473                          | 1932.29            | 2846.34            |
| A_68_P23272336 | chr4:124804630-124804674                          | NM_153159:473     | Zc3h12a    | INSIDE                 | 0.232                                                        | 34.611                         | 6707.85            | 232165.00          | 8.02                           | 7862.82            | 63061.51           |



| ProbeName      | Target position of probe on CpG island microarray | TargetID           | GeneSymbol | CpG island Description | Ratio of relative methylation (TiO <sub>2</sub> -NP/Vehicle) | Sham group                     |                    |                    | TiO <sub>2</sub> -H group      |                    |                    |
|----------------|---------------------------------------------------|--------------------|------------|------------------------|--------------------------------------------------------------|--------------------------------|--------------------|--------------------|--------------------------------|--------------------|--------------------|
|                |                                                   |                    |            |                        |                                                              | Relative methylation (Cy5/Cy3) | Cy3 signal (Input) | Cy5 signal (MeDIP) | Relative methylation (Cy5/Cy3) | Cy3 signal (Input) | Cy5 signal (MeDIP) |
| A_68_P23272342 | chr4:124805193-124805237                          | NM_153159:-89      | Zc3h12a    | PROMOTER               | 0.289                                                        | 8.678                          | 1384.34            | 12013.33           | 2.508                          | 1239.79            | 3109.66            |
| A_68_P23272339 | chr4:124804897-124804941                          | NM_153159:207      | Zc3h12a    | INSIDE                 | 0.423                                                        | 0.539                          | 872.52             | 470.23             | 0.228                          | 775.04             | 176.57             |
| A_68_P29726978 | chr14:75684076-75684120                           | NM_026083:-81      | Zc3h13     | PROMOTER               | 0.602                                                        | 15.853                         | 2013.70            | 31922.26           | 9.544                          | 1669.86            | 15937.61           |
| A_68_P24981260 | chr7:16985638-16985682                            | NM_198631:-884     | Zc3h4      | PROMOTER               | 0.353                                                        | 0.631                          | 1990.76            | 1257.12            | 0.223                          | 1441.66            | 321.72             |
| A_68_P21622283 | chr2:128792891-128792935                          | NM_178404:-225     | Zc3h6      | PROMOTER               | 0.488                                                        | 14.353                         | 14051.55           | 201684.20          | 7.01                           | 12751.01           | 89382.71           |
| A_68_P30379485 | chr15:81602412-81602456                           | NM_001081016:27157 | Zc3h7b     | INSIDE                 | 0.319                                                        | 5.933                          | 1015.88            | 6027.55            | 1.893                          | 891.79             | 1688.26            |
| A_68_P21622216 | chr2:128769433-128769477                          | NM_020594:302      | Zc3h8      | INSIDE                 | 0.656                                                        | 0.655                          | 3993.28            | 2617.40            | 0.43                           | 3006.44            | 1292.54            |
| A_68_P27804178 | chr11:53138130-53138174                           | NM_026479:-38      | Zcche10    | PROMOTER               | 0.319                                                        | 8.298                          | 2590.69            | 21498.50           | 2.645                          | 2359.62            | 6240.66            |
| A_68_P23196094 | chr4:108132526-108132570                          | NM_175472:518      | Zcche11    | INSIDE                 | 0.284                                                        | 29.990                         | 3955.07            | 118611.60          | 8.523                          | 3948.37            | 33650.84           |
| A_68_P23196091 | chr4:108132080-108132124                          | NM_175472:72       | Zcche11    | INSIDE                 | 0.558                                                        | 4.541                          | 2052.51            | 9319.48            | 2.535                          | 1672.66            | 4239.36            |
| A_68_P23196100 | chr4:108133295-108133339                          | NM_175472:1286     | Zcche11    | INSIDE                 | 0.277                                                        | 0.703                          | 1601.03            | 1125.21            | 0.195                          | 1096.65            | 213.54             |
| A_68_P26228075 | chr8:124175832-124175876                          | NM_080855:-21      | Zcche14    | PROMOTER               | 0.57                                                         | 0.350                          | 2196.33            | 767.63             | 0.199                          | 1564.54            | 311.75             |
| A_68_P20505897 | chr1:107890521-107890565                          | NM_001122675:3560  | Zcche2     | INSIDE                 | 0.185                                                        | 13.593                         | 1999.28            | 27176.55           | 2.52                           | 1914.60            | 4824.80            |
| A_68_P20505871 | chr1:107887105-107887149                          | NM_001122675:144   | Zcche2     | INSIDE                 | 0.54                                                         | 3.842                          | 1354.17            | 5202.58            | 2.073                          | 1176.78            | 2439.83            |
| A_68_P21749221 | chr2:152240295-152240339                          | NM_175126:464      | Zcche3     | INSIDE                 | 0.411                                                        | 6.635                          | 2925.17            | 19409.69           | 2.726                          | 2490.88            | 6789.81            |
| A_68_P23696773 | chr5:53174399-53174443                            | NM_030185:115      | Zcche4     | INSIDE                 | 0.405                                                        | 6.044                          | 2787.50            | 16848.57           | 2.445                          | 2432.11            | 5947.18            |
| A_68_P24127578 | chr5:138229444-138229544                          | NM_001005426:489   | Zewpw1     | INSIDE                 | 0.387                                                        | 8.595                          | 583.15             | 5012.21            | 3.324                          | 424.96             | 1412.51            |
| A_68_P24127577 | chr5:138229403-138229447                          | NM_001005426:395   | Zewpw1     | INSIDE                 | 0.216                                                        | 6.717                          | 5078.36            | 34112.24           | 1.452                          | 3349.00            | 4863.84            |
| A_68_P21101318 | chr2:29949237-29949281                            | NM_001037762:-103  | Zdhhe12    | PROMOTER               | 0.553                                                        | 0.654                          | 1891.41            | 1236.08            | 0.361                          | 1566.60            | 566.11             |
| A_68_P25108145 | chr7:56044314-56044358                            | NM_028031:-36      | Zdhhe13    | PROMOTER               | 0.299                                                        | 0.267                          | 3148.45            | 842.16             | 0.08                           | 2462.41            | 197.00             |
| A_68_P32578104 | chrX:101866109-101866153                          | NM_175358:273      | Zdhhe15    | INSIDE                 | 0.254                                                        | 10.527                         | 3324.52            | 34996.18           | 2.673                          | 3587.79            | 9590.16            |
| A_68_P32578106 | chrX:101866324-101866368                          | NM_175358:57       | Zdhhe15    | INSIDE                 | 0.279                                                        | 6.169                          | 594.51             | 3667.22            | 1.723                          | 890.33             | 1533.99            |
| A_68_P27446660 | chr10:110446716-110446760                         | NM_172554:384      | Zdhhe17    | INSIDE                 | 0.53                                                         | 2.671                          | 3922.03            | 10474.56           | 1.417                          | 3309.91            | 4688.79            |
| A_68_P25805590 | chr8:41509132-41509176                            | NM_178395:-14      | Zdhhe2     | PROMOTER               | 0.4                                                          | 9.273                          | 741.01             | 6871.19            | 3.713                          | 714.20             | 2652.00            |
| A_68_P25805592 | chr8:41509363-41509407                            | NM_178395:216      | Zdhhe2     | INSIDE                 | 0.517                                                        | 5.422                          | 2176.18            | 11799.49           | 2.802                          | 1992.11            | 5581.72            |
| A_68_P23059231 | chr4:82505707-82505751                            | NM_026647:-163     | Zdhhe21    | PROMOTER               | 0.409                                                        | 4.798                          | 3418.07            | 16399.04           | 1.96                           | 2776.86            | 5443.05            |
| A_68_P28613411 | chr12:88331320-88331364                           | NM_001080943:-1716 | Zdhhe22    | PROMOTER               | 0.387                                                        | 0.521                          | 1196.06            | 622.75             | 0.201                          | 865.74             | 174.23             |
| A_68_P28613409 | chr12:88331117-88331161                           | NM_001080943:-1512 | Zdhhe22    | PROMOTER               | 0.507                                                        | 5.875                          | 1167.70            | 6860.22            | 2.98                           | 1093.20            | 3257.86            |
| A_68_P28613410 | chr12:88331231-88331275                           | NM_001080943:-1626 | Zdhhe22    | PROMOTER               | 0.586                                                        | 2.529                          | 2638.70            | 6673.82            | 1.482                          | 1974.45            | 2925.24            |
| A_68_P31925604 | chr19:4878831-4878875                             | NM_001168517:163   | Zdhhe24    | INSIDE                 | 0.662                                                        | 2.627                          | 2902.92            | 7625.30            | 1.738                          | 2404.89            | 4179.64            |
| A_68_P26893203 | chr9:123022219-123022263                          | NM_026917:83       | Zdhhe3     | INSIDE                 | 0.649                                                        | 2.624                          | 635.40             | 1667.25            | 1.704                          | 724.27             | 1233.87            |
| A_68_P21394209 | chr2:84555435-84555479                            | NM_144887:-135     | Zdhhe5     | PROMOTER               | 0.198                                                        | 36.607                         | 6143.31            | 224885.20          | 7.234                          | 5942.24            | 42988.50           |
| A_68_P21394210 | chr2:84555540-84555584                            | NM_144887:-241     | Zdhhe5     | PROMOTER               | 0.535                                                        | 3.046                          | 1478.37            | 4502.79            | 1.629                          | 1220.80            | 1989.16            |
| A_68_P32193377 | chr19:55390489-55390533                           | NM_001033573:12    | Zdhhe6     | INSIDE                 | 0.495                                                        | 5.463                          | 1186.76            | 6482.89            | 2.701                          | 1135.90            | 3068.54            |
| A_68_P26217897 | chr8:122625576-122625620                          | NM_133967:-226     | Zdhhe7     | PROMOTER               | 0.375                                                        | 6.017                          | 1493.99            | 8989.72            | 2.254                          | 1154.27            | 2601.25            |
| A_68_P26217895 | chr8:122625358-122625402                          | NM_133967:-8       | Zdhhe7     | PROMOTER               | 0.417                                                        | 9.669                          | 1131.89            | 10944.45           | 4.035                          | 1115.42            | 4500.70            |
| A_68_P26217898 | chr8:122625658-122625702                          | NM_133967:-308     | Zdhhe7     | PROMOTER               | 0.643                                                        | 0.451                          | 1487.19            | 671.46             | 0.29                           | 1257.00            | 364.67             |
| A_68_P30578495 | chr16:18235059-18235103                           | NM_172151:149      | Zdhhe8     | INSIDE                 | 0.287                                                        | 10.125                         | 1979.11            | 20038.45           | 2.906                          | 1497.71            | 4351.94            |
| A_68_P30578494 | chr16:18234940-18234984                           | NM_172151:267      | Zdhhe8     | INSIDE                 | 0.335                                                        | 7.121                          | 5706.27            | 40635.87           | 2.385                          | 4566.68            | 10891.98           |
| A_68_P30578497 | chr16:18235357-18235401                           | NM_172151:-149     | Zdhhe8     | PROMOTER               | 0.495                                                        | 5.079                          | 2752.05            | 13977.44           | 2.514                          | 2130.17            | 5354.30            |
| A_68_P31469349 | chr18:5591373-5591417                             | NM_011546:-494     | Zeb1       | PROMOTER               | 0.372                                                        | 5.586                          | 1452.00            | 8110.23            | 2.075                          | 1176.56            | 2441.46            |
| A_68_P31469353 | chr18:5591872-5591916                             | NM_011546:6        | Zeb1       | INSIDE                 | 0.479                                                        | 0.246                          | 2214.41            | 544.36             | 0.118                          | 1636.77            | 192.66             |
| A_68_P31469354 | chr18:5592137-5592181                             | NM_011546:270      | Zeb1       | INSIDE                 | 0.656                                                        | 4.018                          | 1995.10            | 8015.57            | 2.638                          | 1563.96            | 4125.00            |
| A_68_P20352373 | chr1:75165429-75165473                            | NM_026846:142      | Zfand2b    | INSIDE                 | 0.191                                                        | 0.496                          | 2379.96            | 1179.30            | 0.094                          | 1766.67            | 166.78             |
| A_68_P30302244 | chr15:68090487-68090531                           | NM_001145888:-90   | Zfat       | PROMOTER               | 0.449                                                        | 0.589                          | 1376.47            | 810.77             | 0.265                          | 1159.55            | 307.01             |
| A_68_P27469308 | chr10:114822753-114822797                         | NM_001033261:760   | Zfc3h1     | INSIDE                 | 0.569                                                        | 0.629                          | 1729.95            | 1088.92            | 0.358                          | 1430.19            | 512.00             |

| ProbeName      | Target position of probe on CpG island microarray | TargetID           | GeneSymbol | CpG island Description | Ratio of relative methylation (TiO <sub>2</sub> -NP/Vehicle) | Sham group                     |                    |                    | TiO <sub>2</sub> -H group      |                    |                    |
|----------------|---------------------------------------------------|--------------------|------------|------------------------|--------------------------------------------------------------|--------------------------------|--------------------|--------------------|--------------------------------|--------------------|--------------------|
|                |                                                   |                    |            |                        |                                                              | Relative methylation (Cy5/Cy3) | Cy3 signal (Input) | Cy5 signal (MeDIP) | Relative methylation (Cy5/Cy3) | Cy3 signal (Input) | Cy5 signal (MeDIP) |
| A_68_P26152542 | chr8:111238708-111238758                          | NM_007496:189      | Zfxh3      | INSIDE                 | 0.043                                                        | 2.820                          | 2476.04            | 6982.12            | 0.121                          | 1424.62            | 172.03             |
| A_68_P26152544 | chr8:111239109-111239153                          | NM_007496:587      | Zfxh3      | INSIDE                 | 0.42                                                         | 0.204                          | 6229.38            | 1270.80            | 0.086                          | 4264.77            | 365.10             |
| A_68_P26154344 | chr8:111480628-111480672                          | NM_007496:242107   | Zfxh3      | INSIDE                 | 0.527                                                        | 3.299                          | 8812.01            | 29071.96           | 1.739                          | 6218.15            | 10815.05           |
| A_68_P26154270 | chr8:111471142-111471186                          | NM_007496:232621   | Zfxh3      | INSIDE                 | 0.652                                                        | 4.715                          | 2049.93            | 9666.05            | 3.072                          | 1646.02            | 5056.85            |
| A_68_P26152541 | chr8:111238563-111238607                          | NM_007496:41       | Zfxh3      | INSIDE                 | 0.491                                                        | 3.243                          | 1176.68            | 3816.01            | 1.592                          | 1005.73            | 1601.52            |
| A_68_P21920096 | chr3:5219661-5219705                              | NM_030708:1129     | Zfxh4      | INSIDE                 | 0.259                                                        | 10.866                         | 1606.65            | 17457.84           | 2.815                          | 1497.25            | 4214.16            |
| A_68_P24596103 | chr6:83864434-83864478                            | NM_001166371:110   | Zfml       | INSIDE                 | 0.409                                                        | 0.248                          | 4689.15            | 1164.94            | 0.102                          | 3016.55            | 306.87             |
| A_68_P24596102 | chr6:83864366-83864410                            | NM_001166371:42    | Zfml       | INSIDE                 | 0.5                                                          | 0.186                          | 2774.78            | 516.86             | 0.093                          | 1922.33            | 179.10             |
| A_68_P26169432 | chr8:114167808-114167852                          | NM_001037665:488   | Zfp1       | INSIDE                 | 0.232                                                        | 17.625                         | 1990.90            | 35089.03           | 4.095                          | 2504.02            | 10253.26           |
| A_68_P26892104 | chr9:122832365-122832409                          | NM_009544:191      | Zfp105     | INSIDE                 | 0.534                                                        | 5.938                          | 2277.12            | 13522.67           | 3.173                          | 1819.73            | 5773.70            |
| A_68_P21575995 | chr2:120389596-120389640                          | NM_011743:-51      | Zfp106     | DIVERGENT_PROMOTER     | 0.34                                                         | 4.186                          | 5139.42            | 21512.98           | 1.423                          | 4204.87            | 5983.79            |
| A_68_P24973210 | chr7:13420359-13420403                            | NM_022981:222      | Zfp110     | INSIDE                 | 0.469                                                        | 0.590                          | 830.71             | 490.08             | 0.277                          | 653.34             | 180.68             |
| A_68_P24129053 | chr5:138596838-138596882                          | NM_019747:112      | Zfp113     | INSIDE                 | 0.363                                                        | 0.606                          | 1372.63            | 831.23             | 0.22                           | 1096.32            | 240.83             |
| A_68_P31092441 | chr17:23713283-23713327                           | NM_011747:23150    | Zfp13      | INSIDE                 | 0.658                                                        | 3.039                          | 1709.23            | 5194.00            | 2.001                          | 1216.93            | 2434.64            |
| A_68_P31092442 | chr17:23713394-23713438                           | NM_011747:23038    | Zfp13      | INSIDE                 | 0.617                                                        | 2.353                          | 1954.88            | 4599.91            | 1.452                          | 1465.36            | 2127.48            |
| A_68_P25029683 | chr7:30836003-30836047                            | NM_011748:391      | Zfp14      | INSIDE                 | 0.602                                                        | 0.694                          | 939.24             | 651.99             | 0.418                          | 727.87             | 304.31             |
| A_68_P20349427 | chr1:74634546-74634590                            | NM_029888:34       | Zfp142     | INSIDE                 | 0.661                                                        | 2.463                          | 2313.89            | 5699.77            | 1.628                          | 1818.34            | 2959.53            |
| A_68_P25411545 | chr7:117205191-117205235                          | NM_009281:-3       | Zfp143     | PROMOTER               | 0.278                                                        | 7.577                          | 10205.16           | 77320.15           | 2.105                          | 8148.83            | 17150.06           |
| A_68_P31084703 | chr17:21146020-21146064                           | NM_145483:138      | Zfp160     | INSIDE                 | 0.474                                                        | 0.487                          | 910.39             | 443.60             | 0.231                          | 744.18             | 171.89             |
| A_68_P31323668 | chr17:69733260-69733304                           | NM_009547:-35      | Zfp161     | PROMOTER               | 0.458                                                        | 10.618                         | 2408.01            | 25567.43           | 4.858                          | 2356.18            | 11446.16           |
| A_68_P26891892 | chr9:122795954-122795998                          | NM_001177505:-1612 | Zfp167     | PROMOTER               | 0.637                                                        | 3.025                          | 1965.24            | 5944.57            | 1.927                          | 1655.55            | 3190.15            |
| A_68_P31558278 | chr18:24178812-24178856                           | NM_021559:438      | Zfp191     | INSIDE                 | 0.427                                                        | 1.454                          | 1657.93            | 2410.20            | 0.62                           | 1458.87            | 905.15             |
| A_68_P31092272 | chr17:23683887-23683931                           | NM_001033496:17285 | Zfp213     | DOWNSTREAM             | 0.252                                                        | 0.332                          | 3226.36            | 1070.58            | 0.083                          | 2251.20            | 187.97             |
| A_68_P21851419 | chr2:169956951-169956995                          | NM_001033299:-252  | Zfp217     | PROMOTER               | 0.554                                                        | 4.193                          | 1168.35            | 4898.36            | 2.322                          | 959.49             | 2228.30            |
| A_68_P21851410 | chr2:169955855-169955909                          | NM_001033299:838   | Zfp217     | INSIDE                 | 0.605                                                        | 3.585                          | 907.44             | 3252.83            | 2.17                           | 820.90             | 1781.26            |
| A_68_P21851412 | chr2:169956064-169956108                          | NM_001033299:634   | Zfp217     | INSIDE                 | 0.59                                                         | 3.613                          | 461.24             | 1666.47            | 2.133                          | 403.67             | 861.01             |
| A_68_P20859688 | chr1:179372159-179372203                          | NM_001012330:-2611 | Zfp238     | PROMOTER               | 0.412                                                        | 0.724                          | 1653.30            | 1196.43            | 0.298                          | 1368.48            | 408.08             |
| A_68_P24786877 | chr6:118405159-118405203                          | NM_028335:344      | Zfp248     | INSIDE                 | 0.399                                                        | 4.345                          | 3063.08            | 13309.66           | 1.734                          | 2549.33            | 4421.26            |
| A_68_P24786878 | chr6:118405236-118405280                          | NM_028335:266      | Zfp248     | INSIDE                 | 0.517                                                        | 0.454                          | 1123.84            | 510.77             | 0.235                          | 855.95             | 201.03             |
| A_68_P30350974 | chr15:76701808-76701852                           | NM_001007568:35    | Zfp251     | INSIDE                 | 0.628                                                        | 3.521                          | 1479.04            | 5208.16            | 2.212                          | 1315.66            | 2910.36            |
| A_68_P26342514 | chr9:20264309-20264353                            | NM_011753:274      | Zfp26      | INSIDE                 | 0.225                                                        | 23.286                         | 10102.27           | 235239.80          | 5.24                           | 10171.73           | 53297.95           |
| A_68_P26342513 | chr9:20264224-20264268                            | NM_011753:358      | Zfp26      | INSIDE                 | 0.41                                                         | 0.293                          | 1721.25            | 503.79             | 0.12                           | 1484.07            | 178.25             |
| A_68_P26342786 | chr9:20326146-20326190                            | NM_001082485:-305  | Zfp266     | PROMOTER               | 0.406                                                        | 0.130                          | 5943.44            | 774.21             | 0.053                          | 4233.63            | 224.02             |
| A_68_P26238816 | chr8:125778247-125778291                          | NM_020497:174      | Zfp276     | INSIDE                 | 0.347                                                        | 24.510                         | 3325.16            | 81498.42           | 8.513                          | 3380.16            | 28776.64           |
| A_68_P24955199 | chr7:6335923-6335967                              | NM_175247:-83      | Zfp28      | PROMOTER               | 0.298                                                        | 0.374                          | 1853.70            | 693.84             | 0.112                          | 1538.27            | 171.77             |
| A_68_P24955200 | chr7:6336041-6336085                              | NM_175247:35       | Zfp28      | INSIDE                 | 0.403                                                        | 0.489                          | 3061.49            | 1497.87            | 0.197                          | 2158.04            | 425.05             |
| A_68_P32365466 | chrX:45947510-45947554                            | NM_153532:-2222    | Zfp280c    | PROMOTER               | 0.214                                                        | 22.188                         | 746.05             | 16553.50           | 4.748                          | 1313.40            | 6235.82            |
| A_68_P24424708 | chr6:47827424-47827468                            | NM_146175:-107     | Zfp282     | PROMOTER               | 0.624                                                        | 3.092                          | 728.07             | 2251.11            | 1.928                          | 566.69             | 1092.83            |
| A_68_P22833088 | chr4:34830058-34830102                            | NM_013889:117      | Zfp292     | INSIDE                 | 0.453                                                        | 4.929                          | 2006.08            | 9888.46            | 2.233                          | 1729.84            | 3862.09            |
| A_68_P22833091 | chr4:34830379-34830423                            | NM_013889:-203     | Zfp292     | PROMOTER               | 0.626                                                        | 3.311                          | 2242.04            | 7423.12            | 2.071                          | 1823.68            | 3777.74            |
| A_68_P31002108 | chr16:98183316-98183360                           | NM_001081684:448   | Zfp295     | INSIDE                 | 0.528                                                        | 5.885                          | 2276.96            | 13399.36           | 3.106                          | 1843.59            | 5726.69            |
| A_68_P31002112 | chr16:98183669-98183713                           | NM_001081684:96    | Zfp295     | INSIDE                 | 0.555                                                        | 0.668                          | 1184.31            | 790.72             | 0.37                           | 1008.64            | 373.66             |
| A_68_P27902559 | chr11:70577608-70577652                           | NM_177565:-318     | Zfp3       | PROMOTER               | 0.405                                                        | 0.574                          | 912.87             | 524.39             | 0.233                          | 739.99             | 172.09             |
| A_68_P24155791 | chr5:144031328-144031372                          | NM_017467:351      | Zfp316     | INSIDE                 | 0.401                                                        | 0.160                          | 5020.24            | 804.44             | 0.064                          | 3347.88            | 215.14             |
| A_68_P24155694 | chr5:144016617-144016661                          | NM_017467:15063    | Zfp316     | INSIDE                 | 0.419                                                        | 10.127                         | 3357.67            | 34003.19           | 4.246                          | 2909.93            | 12355.27           |
| A_68_P24155790 | chr5:144031255-144031299                          | NM_017467:425      | Zfp316     | INSIDE                 | 0.468                                                        | 0.473                          | 1283.13            | 607.32             | 0.222                          | 903.32             | 200.17             |

| ProbeName      | Target position of probe on CpG island microarray | TargetID           | GeneSymbol | CpG island Description | Ratio of relative methylation (TiO <sub>2</sub> -NP/Vehicle) | Sham group                     |                    |                    | TiO <sub>2</sub> -H group      |                    |                    |
|----------------|---------------------------------------------------|--------------------|------------|------------------------|--------------------------------------------------------------|--------------------------------|--------------------|--------------------|--------------------------------|--------------------|--------------------|
|                |                                                   |                    |            |                        |                                                              | Relative methylation (Cy5/Cy3) | Cy3 signal (Input) | Cy5 signal (MeDIP) | Relative methylation (Cy5/Cy3) | Cy3 signal (Input) | Cy5 signal (MeDIP) |
| A_68_P24155687 | chr5:144015862-144015906                          | NM_017467:15817    | Zfp316     | INSIDE                 | 0.557                                                        | 5.059                          | 1230.10            | 6223.05            | 2.819                          | 1094.11            | 3084.66            |
| A_68_P24155695 | chr5:144016767-144016811                          | NM_017467:14913    | Zfp316     | INSIDE                 | 0.593                                                        | 2.872                          | 2786.85            | 8004.61            | 1.703                          | 2116.04            | 3603.23            |
| A_68_P31206539 | chr17:46520782-46520826                           | NM_207671:90       | Zfp318     | INSIDE                 | 0.563                                                        | 2.981                          | 824.26             | 2457.04            | 1.68                           | 757.13             | 1271.60            |
| A_68_P28881068 | chr13:23461198-23461242                           | NM_001111107:-149  | Zfp322a    | PROMOTER               | 0.606                                                        | 0.342                          | 1472.86            | 504.41             | 0.208                          | 1200.74            | 249.33             |
| A_68_P24973879 | chr7:13551564-13551609                            | NM_178732:374      | Zfp324     | INSIDE                 | 0.233                                                        | 51.187                         | 6451.35            | 330223.90          | 11.917                         | 8469.74            | 100930.50          |
| A_68_P23957854 | chr5:106305322-106305366                          | NM_018759:-242     | Zfp326     | PROMOTER               | 0.508                                                        | 0.329                          | 1355.51            | 446.33             | 0.167                          | 1002.95            | 167.77             |
| A_68_P23957855 | chr5:106305400-106305444                          | NM_018759:-164     | Zfp326     | PROMOTER               | 0.241                                                        | 2.194                          | 1976.07            | 4336.38            | 0.528                          | 1546.24            | 816.09             |
| A_68_P21823566 | chr2:165213753-165213797                          | NM_178411:-15      | Zfp334     | PROMOTER               | 0.369                                                        | 0.554                          | 1037.17            | 574.86             | 0.204                          | 847.21             | 173.11             |
| A_68_P21823503 | chr2:165205763-165205807                          | NM_178411:7975     | Zfp334     | INSIDE                 | 0.592                                                        | 2.744                          | 1443.76            | 3961.27            | 1.624                          | 1110.56            | 1803.03            |
| A_68_P29053295 | chr13:55206803-55206847                           | NM_012017:155      | Zfp346     | INSIDE                 | 0.359                                                        | 0.341                          | 4353.31            | 1482.67            | 0.122                          | 3196.00            | 391.16             |
| A_68_P27792049 | chr11:50872760-50872804                           | NM_009329:24       | Zfp354a    | INSIDE                 | 0.603                                                        | 0.505                          | 1455.68            | 734.53             | 0.304                          | 1235.42            | 375.86             |
| A_68_P27792052 | chr11:50873003-50873047                           | NM_009329:266      | Zfp354a    | INSIDE                 | 0.654                                                        | 6.552                          | 3393.45            | 22233.00           | 4.287                          | 3095.95            | 13273.79           |
| A_68_P25614225 | chr8:3495864-3495908                              | NM_080461:2749     | Zfp358     | INSIDE                 | 0.394                                                        | 7.981                          | 807.54             | 6444.89            | 3.141                          | 623.66             | 1959.12            |
| A_68_P25021510 | chr7:29163296-29163340                            | NM_011756:929      | Zfp36      | INSIDE                 | 0.258                                                        | 9.160                          | 2654.22            | 24313.81           | 2.366                          | 1973.49            | 4669.69            |
| A_68_P29097416 | chr13:64254085-64254129                           | NM_175494:401      | Zfp367     | INSIDE                 | 0.147                                                        | 14.226                         | 1047.87            | 14906.98           | 2.085                          | 926.66             | 1932.38            |
| A_68_P29097413 | chr13:64253752-64253796                           | NM_175494:733      | Zfp367     | INSIDE                 | 0.504                                                        | 0.332                          | 1927.61            | 640.04             | 0.167                          | 1473.87            | 246.79             |
| A_68_P31403204 | chr17:84587274-84587318                           | NM_001001806:-9    | Zfp3612    | PROMOTER               | 0.368                                                        | 0.177                          | 3754.94            | 663.21             | 0.065                          | 2792.85            | 181.64             |
| A_68_P31403206 | chr17:84587417-84587461                           | NM_001001806:-151  | Zfp3612    | PROMOTER               | 0.598                                                        | 0.437                          | 1279.86            | 559.92             | 0.262                          | 1052.89            | 275.42             |
| A_68_P25030071 | chr7:30928622-30928666                            | NM_001081007:21678 | Zfp382     | DOWNSTREAM             | 0.1                                                          | 2.642                          | 913.05             | 2412.12            | 0.263                          | 712.88             | 187.61             |
| A_68_P24818153 | chr6:124958879-124958923                          | NM_175557:-922     | Zfp384     | PROMOTER               | 0.507                                                        | 0.622                          | 1307.59            | 813.15             | 0.315                          | 1131.03            | 356.58             |
| A_68_P30503506 | chr15:103153692-103153736                         | NM_013866:16803    | Zfp385a    | INSIDE                 | 0.285                                                        | 1.757                          | 9211.34            | 16180.72           | 0.5                            | 6774.33            | 3386.98            |
| A_68_P30503505 | chr15:103153548-103153598                         | NM_013866:16945    | Zfp385a    | INSIDE                 | 0.542                                                        | 0.494                          | 2473.16            | 1222.65            | 0.268                          | 1797.61            | 481.91             |
| A_68_P30503432 | chr15:103144711-103144755                         | NM_013866:25785    | Zfp385a    | INSIDE                 | 0.63                                                         | 2.485                          | 1189.61            | 2956.33            | 1.565                          | 794.17             | 1242.82            |
| A_68_P21359595 | chr2:77654503-77654547                            | NM_178723:349      | Zfp385b    | INSIDE                 | 0.256                                                        | 16.111                         | 894.90             | 14417.27           | 4.121                          | 843.44             | 3475.70            |
| A_68_P28069222 | chr11:100501295-100501339                         | NM_177790:10691    | Zfp385c    | INSIDE                 | 0.499                                                        | 0.613                          | 902.69             | 553.45             | 0.306                          | 721.11             | 220.49             |
| A_68_P27833411 | chr11:58717772-58717816                           | NM_011758:-67      | Zfp39      | PROMOTER               | 0.147                                                        | 26.738                         | 5800.81            | 155102.90          | 3.932                          | 6440.76            | 25327.23           |
| A_68_P27833410 | chr11:58717675-58717719                           | NM_011758:31       | Zfp39      | INSIDE                 | 0.63                                                         | 0.228                          | 4167.97            | 950.05             | 0.144                          | 2823.16            | 405.16             |
| A_68_P29672987 | chr14:65977066-65977114                           | NM_199029:-422     | Zfp395     | PROMOTER               | 0.237                                                        | 19.521                         | 425.31             | 8302.50            | 4.621                          | 447.34             | 2067.38            |
| A_68_P29672990 | chr14:65977418-65977462                           | NM_199029:-72      | Zfp395     | PROMOTER               | 0.629                                                        | 0.393                          | 1440.14            | 566.19             | 0.247                          | 1207.82            | 298.85             |
| A_68_P29672993 | chr14:65977836-65977880                           | NM_199029:346      | Zfp395     | INSIDE                 | 0.604                                                        | 0.620                          | 1479.81            | 917.71             | 0.375                          | 1212.45            | 454.15             |
| A_68_P31889610 | chr18:84759292-84759336                           | NM_001033341:-418  | Zfp407     | PROMOTER               | 0.326                                                        | 5.399                          | 1198.36            | 6470.22            | 1.762                          | 1006.08            | 1772.24            |
| A_68_P30342960 | chr15:75447074-75447118                           | NM_001044718:-18   | Zfp41      | PROMOTER               | 0.623                                                        | 0.576                          | 6231.42            | 3590.13            | 0.359                          | 4329.92            | 1554.37            |
| A_68_P28597562 | chr12:85658591-85658635                           | NM_144833:533      | Zfp410     | INSIDE                 | 0.392                                                        | 0.541                          | 1061.60            | 574.43             | 0.212                          | 852.74             | 180.74             |
| A_68_P26036153 | chr8:90184081-90184125                            | NM_033327:299392   | Zfp423     | DOWNSTREAM             | 0.189                                                        | 10.543                         | 2363.56            | 24919.65           | 1.991                          | 2027.33            | 4036.72            |
| A_68_P26038373 | chr8:90485269-90485313                            | NM_033327:-1796    | Zfp423     | PROMOTER               | 0.192                                                        | 26.790                         | 680.95             | 18242.61           | 5.148                          | 845.76             | 4353.84            |
| A_68_P26036154 | chr8:90184192-90184236                            | NM_033327:299280   | Zfp423     | DOWNSTREAM             | 0.399                                                        | 0.314                          | 7403.14            | 2327.67            | 0.125                          | 5032.66            | 631.18             |
| A_68_P26038364 | chr8:90484174-90484218                            | NM_033327:-702     | Zfp423     | PROMOTER               | 0.415                                                        | 6.225                          | 1394.24            | 8679.11            | 2.586                          | 1231.56            | 3185.05            |
| A_68_P26038355 | chr8:90482696-90482740                            | NM_033327:776      | Zfp423     | INSIDE                 | 0.492                                                        | 3.899                          | 1369.58            | 5340.31            | 1.919                          | 1248.10            | 2395.09            |
| A_68_P26038239 | chr8:90467780-90467824                            | NM_033327:15692    | Zfp423     | INSIDE                 | 0.613                                                        | 0.564                          | 1560.94            | 880.73             | 0.346                          | 1289.81            | 446.06             |
| A_68_P26038357 | chr8:90483082-90483126                            | NM_033327:390      | Zfp423     | INSIDE                 | 0.629                                                        | 3.851                          | 780.29             | 3005.11            | 2.423                          | 678.18             | 1643.01            |
| A_68_P26038371 | chr8:90485107-90485151                            | NM_033327:-1634    | Zfp423     | PROMOTER               | 0.663                                                        | 0.387                          | 1552.82            | 600.70             | 0.256                          | 1189.31            | 304.89             |
| A_68_P26038384 | chr8:90486654-90486698                            | NM_033327:-3182    | Zfp423     | PROMOTER               | 0.489                                                        | 0.501                          | 929.85             | 466.02             | 0.245                          | 690.86             | 169.19             |
| A_68_P31468071 | chr18:5334781-5334825                             | NM_178722:-365     | Zfp438     | PROMOTER               | 0.252                                                        | 0.483                          | 6785.18            | 3277.13            | 0.122                          | 4478.59            | 545.33             |
| A_68_P31468065 | chr18:5334203-5334247                             | NM_178722:213      | Zfp438     | INSIDE                 | 0.552                                                        | 5.535                          | 1423.08            | 7876.34            | 3.056                          | 1181.30            | 3609.60            |
| A_68_P31468070 | chr18:5334710-5334760                             | NM_178722:-297     | Zfp438     | PROMOTER               | 0.467                                                        | 0.567                          | 907.27             | 514.26             | 0.265                          | 661.86             | 175.13             |
| A_68_P22931104 | chr4:54958261-54958305                            | NM_172867:-2534    | Zfp462     | PROMOTER               | 0.41                                                         | 5.504                          | 2244.29            | 12353.32           | 2.259                          | 1821.80            | 4114.54            |

| ProbeName      | Target position of probe on CpG island microarray | TargetID           | GeneSymbol | CpG island Description | Ratio of relative methylation (TiO <sub>2</sub> -NP/Vehicle) | Sham group                     |                    |                    | TiO <sub>2</sub> -H group      |                    |                    |
|----------------|---------------------------------------------------|--------------------|------------|------------------------|--------------------------------------------------------------|--------------------------------|--------------------|--------------------|--------------------------------|--------------------|--------------------|
|                |                                                   |                    |            |                        |                                                              | Relative methylation (Cy5/Cy3) | Cy3 signal (Input) | Cy5 signal (MeDIP) | Relative methylation (Cy5/Cy3) | Cy3 signal (Input) | Cy5 signal (MeDIP) |
| A_68_P24427169 | chr6:48388853-48388897                            | NM_001085415:6215  | Zfp467     | INSIDE                 | 0.375                                                        | 0.416                          | 2030.80            | 844.69             | 0.156                          | 1345.85            | 209.91             |
| A_68_P24427166 | chr6:48388473-48388517                            | NM_001085415:6595  | Zfp467     | INSIDE                 | 0.441                                                        | 3.344                          | 3082.85            | 10308.21           | 1.476                          | 2411.10            | 3559.22            |
| A_68_P31147863 | chr17:33103125-33103169                           | NM_153063:371      | Zfp472     | INSIDE                 | 0.662                                                        | 0.324                          | 1577.42            | 511.24             | 0.215                          | 1272.08            | 273.09             |
| A_68_P29455874 | chr14:22804989-22805033                           | NM_145459:3813     | Zfp503     | INSIDE                 | 0.007                                                        | 756.184                        | 700.71             | 529864.90          | 5.651                          | 579.29             | 3273.36            |
| A_68_P29455867 | chr14:22804205-22804249                           | NM_145459:4597     | Zfp503     | INSIDE                 | 0.345                                                        | 5.991                          | 7375.08            | 44187.60           | 2.066                          | 5464.57            | 11290.66           |
| A_68_P29455876 | chr14:22805255-22805299                           | NM_145459:3547     | Zfp503     | INSIDE                 | 0.38                                                         | 14.565                         | 5489.67            | 79957.10           | 5.528                          | 4677.07            | 25856.19           |
| A_68_P29455869 | chr14:22804369-22804413                           | NM_145459:4433     | Zfp503     | INSIDE                 | 0.621                                                        | 0.570                          | 1621.00            | 923.93             | 0.354                          | 1140.35            | 403.81             |
| A_68_P29455871 | chr14:22804612-22804656                           | NM_145459:4189     | Zfp503     | INSIDE                 | 0.661                                                        | 5.874                          | 3121.55            | 18335.59           | 3.884                          | 2448.48            | 9510.18            |
| A_68_P25051309 | chr7:36588072-36588116                            | NM_177739:-86      | Zfp507     | PROMOTER               | 0.664                                                        | 4.466                          | 538.18             | 2403.49            | 2.963                          | 438.71             | 1300.11            |
| A_68_P23577056 | chr5:31504361-31504406                            | NM_001177901:32    | Zfp513     | INSIDE                 | 0.37                                                         | 0.545                          | 6730.20            | 3670.60            | 0.202                          | 4327.21            | 872.94             |
| A_68_P23577042 | chr5:31502796-31502840                            | NM_001177901:1597  | Zfp513     | INSIDE                 | 0.493                                                        | 5.420                          | 4681.35            | 25373.72           | 2.672                          | 3795.62            | 10141.27           |
| A_68_P31879479 | chr18:83126499-83126543                           | NM_001177464:42497 | Zfp516     | INSIDE                 | 0.507                                                        | 17.603                         | 2919.73            | 51394.69           | 8.931                          | 2477.46            | 22125.38           |
| A_68_P31879115 | chr18:83079129-83079173                           | NM_183033:-1120    | Zfp516     | PROMOTER               | 0.616                                                        | 0.309                          | 1518.87            | 468.91             | 0.19                           | 1099.75            | 209.03             |
| A_68_P31879119 | chr18:83079657-83079701                           | NM_183033:-592     | Zfp516     | PROMOTER               | 0.476                                                        | 0.615                          | 1550.50            | 953.35             | 0.293                          | 1137.94            | 333.22             |
| A_68_P32111692 | chr19:40969658-40969702                           | NM_028319:486      | Zfp518a    | INSIDE                 | 0.53                                                         | 3.484                          | 6126.17            | 21345.01           | 1.846                          | 4860.83            | 8971.56            |
| A_68_P23622265 | chr5:39075785-39075829                            | NM_001081144:259   | Zfp518b    | INSIDE                 | 0.494                                                        | 3.856                          | 1102.86            | 4252.39            | 1.904                          | 978.40             | 1863.31            |
| A_68_P23622266 | chr5:39075940-39075984                            | NM_001081144:103   | Zfp518b    | INSIDE                 | 0.548                                                        | 0.548                          | 1168.43            | 640.76             | 0.3                            | 779.05             | 234.10             |
| A_68_P31086417 | chr17:21669593-21669637                           | NM_144515:-2888    | Zfp52      | PROMOTER               | 0.27                                                         | 9.839                          | 2084.85            | 20513.02           | 2.654                          | 1832.60            | 4864.57            |
| A_68_P31120939 | chr17:28314640-28314684                           | NM_172617:300      | Zfp523     | INSIDE                 | 0.439                                                        | 4.229                          | 5514.91            | 23321.52           | 1.858                          | 4160.94            | 7732.45            |
| A_68_P31120935 | chr17:28314314-28314358                           | NM_172617:-26      | Zfp523     | PROMOTER               | 0.521                                                        | 0.547                          | 1353.59            | 740.26             | 0.285                          | 1047.92            | 298.69             |
| A_68_P31120933 | chr17:28314032-28314076                           | NM_172617:-308     | Zfp523     | PROMOTER               | 0.613                                                        | 3.594                          | 684.82             | 2461.06            | 2.204                          | 637.36             | 1405.01            |
| A_68_P24951576 | chr7:4967342-4967386                              | NM_025324:255      | Zfp524     | INSIDE                 | 0.202                                                        | 14.183                         | 2053.75            | 29128.82           | 2.862                          | 1800.97            | 5153.48            |
| A_68_P25009105 | chr7:26010680-26010724                            | NM_175436:4233     | Zfp526     | INSIDE                 | 0.27                                                         | 6.914                          | 2580.38            | 17841.68           | 1.867                          | 2047.57            | 3822.63            |
| A_68_P25009109 | chr7:26011119-26011163                            | NM_175436:4671     | Zfp526     | INSIDE                 | 0.16                                                         | 10.814                         | 1521.76            | 16456.45           | 1.735                          | 1161.35            | 2014.58            |
| A_68_P31086236 | chr17:21626256-21626300                           | NM_013843:327      | Zfp53      | INSIDE                 | 0.531                                                        | 2.898                          | 1895.58            | 5493.17            | 1.538                          | 1545.00            | 2375.49            |
| A_68_P31782005 | chr18:65740650-65740694                           | NM_207255:789      | Zfp532     | INSIDE                 | 0.387                                                        | 12.322                         | 3872.62            | 47719.12           | 4.773                          | 3404.33            | 16247.81           |
| A_68_P25063502 | chr7:38555339-38555383                            | NM_172385:-589     | Zfp536     | PROMOTER               | 0.391                                                        | 0.456                          | 9916.38            | 4523.94            | 0.178                          | 7162.99            | 1277.13            |
| A_68_P24979385 | chr7:16647414-16647458                            | NM_001099277:-9854 | Zfp541     | PROMOTER               | 0.371                                                        | 9.507                          | 2746.06            | 26108.04           | 3.531                          | 2272.32            | 8023.73            |
| A_68_P25504683 | chr7:134376847-134376891                          | NM_146201:-88      | Zfp553     | DIVERGENT_PROMOTER     | 0.331                                                        | 15.655                         | 3696.24            | 8895.95            | 5.177                          | 480.02             | 2485.11            |
| A_68_P25008269 | chr7:25866719-25866763                            | NM_175477:4476     | Zfp574     | INSIDE                 | 0.151                                                        | 23.491                         | 3696.85            | 86841.91           | 3.549                          | 3400.58            | 12068.27           |
| A_68_P25008265 | chr7:25866336-25866380                            | NM_175477:4094     | Zfp574     | INSIDE                 | 0.472                                                        | 5.670                          | 2917.37            | 16542.04           | 2.674                          | 2116.14            | 5658.82            |
| A_68_P25008235 | chr7:25862727-25862771                            | NM_175477:484      | Zfp574     | INSIDE                 | 0.307                                                        | 1.453                          | 2476.28            | 3598.12            | 0.445                          | 1547.92            | 689.55             |
| A_68_P25008229 | chr7:25861867-25861911                            | NM_001168506:-335  | Zfp574     | DIVERGENT_PROMOTER     | 0.383                                                        | 4.326                          | 1113.67            | 4817.49            | 1.656                          | 1001.54            | 1658.21            |
| A_68_P25008231 | chr7:25862140-25862187                            | NM_001168506:-60   | Zfp574     | DIVERGENT_PROMOTER     | 0.475                                                        | 0.583                          | 820.50             | 478.30             | 0.277                          | 645.82             | 178.79             |
| A_68_P25005689 | chr7:25378891-25378935                            | NM_001033205:-6252 | Zfp575     | PROMOTER               | 0.165                                                        | 33.757                         | 2252.05            | 76022.70           | 5.586                          | 2117.67            | 11829.71           |
| A_68_P24951459 | chr7:4945480-4945524                              | NM_026741:2201     | Zfp579     | INSIDE                 | 0.494                                                        | 4.487                          | 1280.83            | 5747.66            | 2.216                          | 1002.19            | 2221.17            |
| A_68_P24951458 | chr7:4945401-4945445                              | NM_026741:2281     | Zfp579     | INSIDE                 | 0.194                                                        | 8.422                          | 3274.55            | 27578.06           | 1.638                          | 2537.02            | 4155.10            |
| A_68_P24951457 | chr7:4945305-4945349                              | NM_026741:2377     | Zfp579     | INSIDE                 | 0.549                                                        | 2.953                          | 1990.81            | 5878.89            | 1.62                           | 1477.55            | 2393.36            |
| A_68_P24951471 | chr7:4947350-4947394                              | NM_026741:331      | Zfp579     | INSIDE                 | 0.454                                                        | 1.444                          | 4635.29            | 6695.36            | 0.656                          | 3415.49            | 2240.23            |
| A_68_P31098880 | chr17:24806951-24806995                           | NM_183149:276      | Zfp598     | INSIDE                 | 0.338                                                        | 0.640                          | 871.57             | 557.66             | 0.216                          | 800.54             | 173.03             |
| A_68_P26351028 | chr9:22064295-22064339                            | NM_181419:23       | Zfp599     | INSIDE                 | 0.424                                                        | 0.319                          | 1657.29            | 529.49             | 0.135                          | 1289.40            | 174.46             |
| A_68_P31722245 | chr18:55147700-55147744                           | NM_175751:2112     | Zfp608     | INSIDE                 | 0.395                                                        | 0.450                          | 1514.12            | 680.91             | 0.177                          | 1091.69            | 193.72             |
| A_68_P26160581 | chr8:112603963-112604007                          | NM_175480:351      | Zfp612     | INSIDE                 | 0.613                                                        | 0.549                          | 2764.34            | 1517.47            | 0.337                          | 1938.77            | 652.79             |
| A_68_P25959077 | chr8:74446861-74446905                            | NM_133358:159      | Zfp617     | INSIDE                 | 0.312                                                        | 16.672                         | 2407.48            | 40137.12           | 5.207                          | 1971.16            | 10262.98           |
| A_68_P27781838 | chr11:49016880-49016924                           | NM_001024846:-99   | Zfp62      | PROMOTER               | 0.547                                                        | 0.238                          | 5367.39            | 1275.26            | 0.13                           | 4132.54            | 537.45             |
| A_68_P27781839 | chr11:49017033-49017077                           | NM_001024846:53    | Zfp62      | INSIDE                 | 0.461                                                        | 3.659                          | 2540.33            | 9295.37            | 1.688                          | 2373.33            | 4005.83            |

| ProbeName      | Target position of probe on CpG island microarray | TargetID           | GeneSymbol | CpG island Description | Ratio of relative methylation (TiO <sub>2</sub> -NP/Vehicle) | Sham group                     |                    |                    | TiO <sub>2</sub> -H group      |                    |                    |
|----------------|---------------------------------------------------|--------------------|------------|------------------------|--------------------------------------------------------------|--------------------------------|--------------------|--------------------|--------------------------------|--------------------|--------------------|
|                |                                                   |                    |            |                        |                                                              | Relative methylation (Cy5/Cy3) | Cy3 signal (Input) | Cy5 signal (MeDIP) | Relative methylation (Cy5/Cy3) | Cy3 signal (Input) | Cy5 signal (MeDIP) |
| A_68_P30084544 | chr15:25914715-25914759                           | NM_144523:616      | Zfp622     | INSIDE                 | 0.378                                                        | 4.754                          | 2650.50            | 12600.73           | 1.795                          | 2255.05            | 4047.97            |
| A_68_P24951043 | chr7:4866972-4867016                              | NM_170759:176      | Zfp628     | INSIDE                 | 0.271                                                        | 5.831                          | 864.02             | 5038.02            | 1.579                          | 884.70             | 1397.27            |
| A_68_P25506497 | chr7:134754654-134754698                          | NM_177226:3271     | Zfp629     | INSIDE                 | 0.446                                                        | 3.959                          | 1145.38            | 4534.04            | 1.766                          | 849.77             | 1500.93            |
| A_68_P22038453 | chr3:32409465-32409509                            | NM_144519:-27      | Zfp639     | PROMOTER               | 0.493                                                        | 0.521                          | 2415.56            | 1258.84            | 0.257                          | 2009.45            | 516.73             |
| A_68_P21844345 | chr2:168780474-168780518                          | NM_009564:591      | Zfp64      | INSIDE                 | 0.6                                                          | 3.543                          | 1202.65            | 4261.04            | 1.225                          | 932.86             | 1982.27            |
| A_68_P21844347 | chr2:168780711-168780761                          | NM_009564:351      | Zfp64      | INSIDE                 | 0.467                                                        | 4.783                          | 666.43             | 3187.51            | 2.234                          | 533.72             | 1192.21            |
| A_68_P30474027 | chr15:98126645-98126689                           | NM_173769:-152     | Zfp641     | PROMOTER               | 0.425                                                        | 3.319                          | 2048.04            | 6798.11            | 1.41                           | 1810.43            | 2552.14            |
| A_68_P23962878 | chr5:107125443-107125487                          | NM_026856:385      | Zfp644     | INSIDE                 | 0.268                                                        | 16.071                         | 4782.83            | 76863.17           | 4.314                          | 4987.03            | 21513.49           |
| A_68_P20730829 | chr1:156051855-156051899                          | NM_001204908:3560  | Zfp648     | INSIDE                 | 0.131                                                        | 4.095                          | 5231.91            | 21426.70           | 0.538                          | 3768.72            | 2029.03            |
| A_68_P20730836 | chr1:156052430-156052474                          | NM_001204908:4136  | Zfp648     | INSIDE                 | 0.375                                                        | 0.428                          | 1494.58            | 639.68             | 0.16                           | 1078.37            | 172.94             |
| A_68_P20730831 | chr1:156052030-156052074                          | NM_001204908:3736  | Zfp648     | INSIDE                 | 0.498                                                        | 0.584                          | 1900.23            | 1110.07            | 0.291                          | 1416.98            | 411.97             |
| A_68_P20730830 | chr1:156051942-156051986                          | NM_001204908:3648  | Zfp648     | INSIDE                 | 0.339                                                        | 0.745                          | 4743.29            | 3536.02            | 0.253                          | 3081.93            | 779.94             |
| A_68_P26350251 | chr9:21860554-21860598                            | NM_177318:15213    | Zfp653     | INSIDE                 | 0.584                                                        | 3.853                          | 1380.52            | 5319.27            | 2.251                          | 1101.07            | 2478.54            |
| A_68_P26350325 | chr9:21875273-21875317                            | NM_177318:495      | Zfp653     | INSIDE                 | 0.401                                                        | 1.427                          | 4977.41            | 7101.47            | 0.571                          | 3658.47            | 2090.79            |
| A_68_P24063275 | chr5:125343770-125343814                          | NM_001081750:718   | Zfp664     | INSIDE                 | 0.639                                                        | 4.844                          | 2298.29            | 11133.67           | 3.096                          | 1910.48            | 5914.66            |
| A_68_P24954797 | chr7:6237978-6238022                              | NM_001024928:-181  | Zfp667     | PROMOTER               | 0.52                                                         | 0.268                          | 3000.13            | 803.94             | 0.139                          | 2178.68            | 303.45             |
| A_68_P25507825 | chr7:135020108-135020152                          | NM_146259:207      | Zfp668     | INSIDE                 | 0.592                                                        | 6.285                          | 1404.48            | 8826.69            | 3.721                          | 1267.05            | 4714.84            |
| A_68_P27830380 | chr11:58136423-58136467                           | NM_178761:404      | Zfp672     | INSIDE                 | 0.41                                                         | 9.885                          | 4353.21            | 43032.60           | 4.05                           | 3488.11            | 14125.80           |
| A_68_P24130913 | chr5:139060841-139060885                          | NM_001044747:109   | Zfp68      | INSIDE                 | 0.468                                                        | 0.484                          | 2209.14            | 1069.77            | 0.226                          | 1753.11            | 396.97             |
| A_68_P22341853 | chr3:94819143-94819187                            | NM_030074:-4       | Zfp687     | PROMOTER               | 0.299                                                        | 16.095                         | 846.55             | 13624.91           | 4.816                          | 806.50             | 3884.07            |
| A_68_P25505557 | chr7:134565221-134565265                          | NM_026999:306      | Zfp688     | INSIDE                 | 0.308                                                        | 0.488                          | 2151.03            | 1049.15            | 0.15                           | 1438.30            | 216.07             |
| A_68_P23254147 | chr4:120624114-120624158                          | NM_001005788:170   | Zfp69      | INSIDE                 | 0.607                                                        | 2.552                          | 2306.99            | 5887.24            | 1.549                          | 1743.43            | 2700.56            |
| A_68_P23244004 | chr4:118846518-118846562                          | NM_001145935:-79   | Zfp691     | PROMOTER               | 0.451                                                        | 0.635                          | 1607.08            | 1020.69            | 0.286                          | 1227.37            | 351.53             |
| A_68_P22360096 | chr3:98232313-98232357                            | NM_172863:45931    | Zfp697     | INSIDE                 | 0.423                                                        | 0.571                          | 940.70             | 536.71             | 0.241                          | 707.16             | 170.51             |
| A_68_P25735809 | chr8:28089115-28089159                            | NM_001101502:1329  | Zfp703     | INSIDE                 | 0.427                                                        | 4.645                          | 14604.29           | 67830.69           | 1.986                          | 14441.44           | 28673.71           |
| A_68_P25735800 | chr8:28087824-28087868                            | NM_001101502:39    | Zfp703     | INSIDE                 | 0.47                                                         | 0.417                          | 2304.99            | 960.84             | 0.196                          | 1541.77            | 302.16             |
| A_68_P25735818 | chr8:28090001-28090046                            | NM_001101502:2216  | Zfp703     | INSIDE                 | 0.285                                                        | 0.712                          | 1575.55            | 1121.15            | 0.203                          | 1321.40            | 267.63             |
| A_68_P25735811 | chr8:28089322-28089366                            | NM_001101502:1537  | Zfp703     | INSIDE                 | 0.635                                                        | 3.286                          | 723.68             | 2378.21            | 2.087                          | 729.40             | 1522.42            |
| A_68_P25735806 | chr8:28088778-28088822                            | NM_001101502:993   | Zfp703     | INSIDE                 | 0.361                                                        | 1.520                          | 1842.05            | 2799.86            | 0.549                          | 1493.82            | 820.12             |
| A_68_P30141812 | chr15:36936605-36936649                           | NM_026521:531      | Zfp706     | INSIDE                 | 0.479                                                        | 5.799                          | 250.12             | 1450.57            | 2.78                           | 206.54             | 574.12             |
| A_68_P25264700 | chr7:87226640-87226684                            | NM_175433:55549    | Zfp710     | INSIDE                 | 0.187                                                        | 12.741                         | 1708.87            | 21772.02           | 2.383                          | 1022.46            | 2436.62            |
| A_68_P25264340 | chr7:87172009-87172053                            | NM_175433:917      | Zfp710     | INSIDE                 | 0.575                                                        | 3.941                          | 1746.40            | 6883.01            | 2.267                          | 1315.18            | 2981.11            |
| A_68_P25264699 | chr7:87226574-87226619                            | NM_175433:55483    | Zfp710     | INSIDE                 | 0.233                                                        | 8.937                          | 895.67             | 8004.38            | 2.079                          | 610.44             | 1269.19            |
| A_68_P33603687 | chrX:109715096-109715140                          | NM_177747:984      | Zfp711     | INSIDE                 | 0.245                                                        | 15.671                         | 1477.62            | 23155.34           | 3.837                          | 1608.66            | 6173.19            |
| A_68_P29107216 | chr13:67161978-67162022                           | NM_001166218:106   | Zfp712     | INSIDE                 | 0.459                                                        | 0.318                          | 1639.99            | 521.51             | 0.146                          | 1317.04            | 192.18             |
| A_68_P25505251 | chr7:134487065-134487109                          | NM_146202:1742     | Zfp768     | INSIDE                 | 0.31                                                         | 5.999                          | 1993.65            | 11960.13           | 1.86                           | 1651.80            | 3071.80            |
| A_68_P25505266 | chr7:134488622-134488666                          | NM_146202:184      | Zfp768     | INSIDE                 | 0.649                                                        | 0.217                          | 3739.21            | 810.92             | 0.141                          | 2431.81            | 342.08             |
| A_68_P25505268 | chr7:134488780-134488824                          | NM_146202:26       | Zfp768     | INSIDE                 | 0.28                                                         | 0.734                          | 5120.10            | 3759.66            | 0.206                          | 3552.74            | 730.37             |
| A_68_P21538596 | chr2:114027103-114027147                          | NM_175466:44       | Zfp770     | INSIDE                 | 0.572                                                        | 0.363                          | 1424.85            | 516.94             | 0.208                          | 1260.36            | 261.62             |
| A_68_P25504787 | chr7:134397287-134397332                          | NM_177362:9270     | Zfp771     | INSIDE                 | 0.589                                                        | 0.391                          | 1123.45            | 438.99             | 0.23                           | 899.72             | 207.16             |
| A_68_P27291280 | chr10:81233564-81233608                           | NM_199062:301      | Zfp781     | INSIDE                 | 0.583                                                        | 0.227                          | 3839.17            | 869.87             | 0.132                          | 3090.06            | 407.98             |
| A_68_P24424497 | chr6:47780471-47780515                            | NM_177882:12       | Zfp786     | INSIDE                 | 0.459                                                        | 3.629                          | 1942.11            | 7047.29            | 1.666                          | 1618.94            | 2696.50            |
| A_68_P24954289 | chr7:6106868-6106913                              | NM_001013012:683   | Zfp787     | INSIDE                 | 0.215                                                        | 16.756                         | 1597.64            | 26770.05           | 3.611                          | 1417.97            | 5120.07            |
| A_68_P24954137 | chr7:6083887-6083931                              | NM_001013012:23665 | Zfp787     | INSIDE                 | 0.229                                                        | 12.361                         | 4331.65            | 53543.80           | 2.827                          | 3297.93            | 9323.84            |
| A_68_P24954294 | chr7:6107601-6107645                              | NM_001013012:-49   | Zfp787     | PROMOTER               | 0.338                                                        | 12.439                         | 5459.95            | 67917.29           | 4.21                           | 4556.41            | 19183.30           |
| A_68_P24954292 | chr7:6107153-6107197                              | NM_001013012:399   | Zfp787     | INSIDE                 | 0.418                                                        | 4.422                          | 1488.33            | 6582.05            | 1.848                          | 1265.44            | 2338.38            |

| ProbeName      | Target position of probe on CpG island microarray | TargetID           | GeneSymbol | CpG island Description | Ratio of relative methylation (TiO <sub>2</sub> -NP/Vehicle) | Sham group                     |                    |                    | TiO <sub>2</sub> -H group      |                    |                    |
|----------------|---------------------------------------------------|--------------------|------------|------------------------|--------------------------------------------------------------|--------------------------------|--------------------|--------------------|--------------------------------|--------------------|--------------------|
|                |                                                   |                    |            |                        |                                                              | Relative methylation (Cy5/Cy3) | Cy3 signal (Input) | Cy5 signal (MeDIP) | Relative methylation (Cy5/Cy3) | Cy3 signal (Input) | Cy5 signal (MeDIP) |
| A_68_P24954135 | chr7:6083578-6083622                              | NM_001013012:23973 | Zfp787     | INSIDE                 | 0.465                                                        | 3.287                          | 1690.65            | 5556.83            | 1.527                          | 1115.37            | 1703.42            |
| A_68_P31147212 | chr17:32966976-32967020                           | NM_177359:195      | Zfp799     | INSIDE                 | 0.562                                                        | 10.188                         | 2381.93            | 24266.48           | 5.729                          | 2106.33            | 12066.59           |
| A_68_P31147211 | chr17:32966831-32966875                           | NM_177359:341      | Zfp799     | INSIDE                 | 0.592                                                        | 3.135                          | 1182.37            | 3706.89            | 1.856                          | 1138.48            | 2113.11            |
| A_68_P24319362 | chr6:28210996-28211040                            | NM_001081678:583   | Zfp800     | INSIDE                 | 0.535                                                        | 2.687                          | 1900.06            | 5105.06            | 1.438                          | 1540.35            | 2214.29            |
| A_68_P21382117 | chr2:81893227-81893271                            | NM_175513:-566     | Zfp804a    | PROMOTER               | 0.296                                                        | 0.159                          | 5001.19            | 793.66             | 0.047                          | 3575.95            | 167.76             |
| A_68_P31148785 | chr17:33495528-33495572                           | NM_207541:273      | Zfp81      | PROMOTER               | 0.374                                                        | 5.558                          | 3644.49            | 20255.24           | 2.078                          | 2861.71            | 5946.11            |
| A_68_P25029775 | chr7:30857776-30857820                            | NM_177889:44       | Zfp82      | INSIDE                 | 0.355                                                        | 5.909                          | 1356.87            | 8018.10            | 2.099                          | 1143.65            | 2400.16            |
| A_68_P25992691 | chr8:81636666-81636710                            | NM_178267:84353    | Zfp827     | INSIDE                 | 0.266                                                        | 20.442                         | 4682.79            | 95726.33           | 5.437                          | 3326.37            | 18085.89           |
| A_68_P25992690 | chr8:81636588-81636632                            | NM_178267:84275    | Zfp827     | INSIDE                 | 0.296                                                        | 57.403                         | 15357.31           | 881555.80          | 16.995                         | 11258.76           | 191345.50          |
| A_68_P25992689 | chr8:81636479-81636523                            | NM_178267:84165    | Zfp827     | INSIDE                 | 0.327                                                        | 28.202                         | 8524.10            | 240396.70          | 9.227                          | 7163.49            | 66099.21           |
| A_68_P25992132 | chr8:81553538-81553582                            | NM_178267:1225     | Zfp827     | INSIDE                 | 0.304                                                        | 2.217                          | 9188.56            | 20368.76           | 0.673                          | 6680.46            | 4497.67            |
| A_68_P25670894 | chr8:13870055-13870099                            | NM_181854:436      | Zfp828     | INSIDE                 | 0.609                                                        | 2.481                          | 1254.15            | 3111.15            | 1.511                          | 1020.05            | 1541.57            |
| A_68_P28740684 | chr12:112088879-112088923                         | NM_001199785:412   | Zfp839     | INSIDE                 | 0.481                                                        | 3.293                          | 2951.81            | 9719.22            | 1.585                          | 2449.04            | 3880.62            |
| A_68_P24951681 | chr7:4982839-4982883                              | NM_001033383:10883 | Zfp865     | INSIDE                 | 0.415                                                        | 6.419                          | 1765.97            | 11335.35           | 2.666                          | 1359.54            | 3625.01            |
| A_68_P24951673 | chr7:4981991-4982035                              | NM_001033383:10035 | Zfp865     | INSIDE                 | 0.598                                                        | 7.280                          | 2511.67            | 18285.45           | 4.356                          | 2053.22            | 8943.64            |
| A_68_P24951675 | chr7:4982142-4982186                              | NM_001033383:10187 | Zfp865     | INSIDE                 | 0.477                                                        | 3.119                          | 2198.84            | 6857.53            | 1.489                          | 1634.18            | 2432.58            |
| A_68_P25947574 | chr8:72149082-72149126                            | NM_001045553:-30   | Zfp868     | PROMOTER               | 0.542                                                        | 0.538                          | 1822.77            | 980.12             | 0.292                          | 1675.63            | 488.70             |
| A_68_P25947784 | chr8:72240592-72240636                            | NM_181274:-229     | Zfp869     | PROMOTER               | 0.51                                                         | 3.244                          | 2504.49            | 8124.55            | 1.656                          | 2136.81            | 3538.04            |
| A_68_P31147009 | chr17:32924787-32924831                           | NM_172458:424      | Zfp871     | INSIDE                 | 0.338                                                        | 12.789                         | 5589.51            | 71483.83           | 4.319                          | 5520.83            | 23842.80           |
| A_68_P26350760 | chr9:21992704-21992748                            | NM_001033813:117   | Zfp872     | INSIDE                 | 0.538                                                        | 2.863                          | 5663.59            | 16212.23           | 1.541                          | 5243.17            | 8077.34            |
| A_68_P25959007 | chr8:74432656-74432700                            | NM_001166645:174   | Zfp882     | INSIDE                 | 0.416                                                        | 0.527                          | 926.01             | 488.35             | 0.22                           | 831.67             | 182.67             |
| A_68_P31087861 | chr17:22058135-22058179                           | NM_001199048:41275 | Zfp942     | DOWNSTREAM             | 0.102                                                        | 32.051                         | 8198.71            | 262777.90          | 3.256                          | 6842.64            | 22280.27           |
| A_68_P31090923 | chr17:23013560-23013604                           | NM_001110254:-9481 | Zfp945     | PROMOTER               | 0.067                                                        | 44.514                         | 1304.97            | 58089.41           | 2.971                          | 1206.20            | 3583.43            |
| A_68_P31090924 | chr17:23013653-23013697                           | NM_001110254:-9573 | Zfp945     | PROMOTER               | 0.478                                                        | 6.586                          | 2152.40            | 14175.36           | 3.149                          | 1957.09            | 6161.95            |
| A_68_P25947839 | chr8:72273658-72273702                            | NM_001200023:181   | Zfp963     | INSIDE                 | 0.576                                                        | 0.308                          | 2533.06            | 780.27             | 0.178                          | 2056.74            | 365.12             |
| A_68_P25947613 | chr8:72178336-72178380                            | NM_001177527:-96   | Zfp964     | PROMOTER               | 0.264                                                        | 18.228                         | 2085.40            | 38013.32           | 4.821                          | 2199.77            | 10604.31           |
| A_68_P31932619 | chr19:6084791-6084835                             | NM_024231:79       | Zfp11      | INSIDE                 | 0.346                                                        | 0.591                          | 3651.86            | 2156.43            | 0.204                          | 2635.83            | 538.86             |
| A_68_P30160398 | chr15:40486792-40486836                           | NM_011766:227      | Zfpm2      | INSIDE                 | 0.506                                                        | 7.198                          | 7105.08            | 51140.23           | 3.645                          | 5615.96            | 20472.51           |
| A_68_P30019884 | chr15:12048005-12048049                           | NM_011767:421      | Zfr        | INSIDE                 | 0.619                                                        | 0.514                          | 1950.82            | 1003.57            | 0.318                          | 1385.51            | 441.13             |
| A_68_P30019883 | chr15:12047938-12047982                           | NM_011767:355      | Zfr        | INSIDE                 | 0.46                                                         | 1.544                          | 5344.90            | 8252.53            | 0.711                          | 4369.14            | 3104.86            |
| A_68_P27288263 | chr10:80702990-80703034                           | NM_001034895:7105  | Zfr2       | INSIDE                 | 0.538                                                        | 5.713                          | 600.43             | 3430.12            | 3.074                          | 495.93             | 1524.53            |
| A_68_P27288225 | chr10:80695805-80695849                           | NM_001034895:-81   | Zfr2       | DIVERGENT_PROMOTER     | 0.644                                                        | 0.425                          | 5747.10            | 2441.83            | 0.274                          | 4280.50            | 1171.40            |
| A_68_P32537532 | chrX:91368506-91368550                            | NM_001044386:218   | Zfx        | INSIDE                 | 0.175                                                        | 21.432                         | 2404.92            | 51542.39           | 3.757                          | 2478.79            | 9313.05            |
| A_68_P32537531 | chrX:91368428-91368472                            | NM_001044386:296   | Zfx        | INSIDE                 | 0.41                                                         | 10.475                         | 759.67             | 7957.33            | 4.29                           | 1001.92            | 4298.47            |
| A_68_P32537534 | chrX:91368825-91368869                            | NM_001044386:-100  | Zfx        | PROMOTER               | 0.583                                                        | 4.503                          | 1053.41            | 4743.59            | 2.625                          | 1277.08            | 3352.04            |
| A_68_P28593634 | chr12:84937743-84937787                           | NM_183154:333      | Zfyve1     | INSIDE                 | 0.431                                                        | 1.374                          | 3829.52            | 5260.96            | 0.592                          | 2794.19            | 1655.50            |
| A_68_P29224475 | chr13:93300495-93300539                           | NM_173392:249      | Zfyve16    | INSIDE                 | 0.614                                                        | 0.657                          | 2361.86            | 1551.97            | 0.403                          | 2126.17            | 857.67             |
| A_68_P24643833 | chr6:92164652-92164696                            | NM_030081:131      | Zfyve20    | INSIDE                 | 0.313                                                        | 0.668                          | 4844.02            | 3235.50            | 0.209                          | 3519.97            | 735.16             |
| A_68_P28746261 | chr12:113052815-113052859                         | NM_026752:456      | Zfyve21    | INSIDE                 | 0.273                                                        | 9.437                          | 1503.11            | 14185.03           | 2.577                          | 1294.91            | 3337.63            |
| A_68_P26345262 | chr9:20871580-20871624                            | NM_001103168:-65   | Zglp1      | PROMOTER               | 0.345                                                        | 5.722                          | 1207.85            | 6911.08            | 1.971                          | 902.97             | 1779.98            |
| A_68_P21910181 | chr2:181099844-181099888                          | NM_144894:231      | Zgpat      | INSIDE                 | 0.524                                                        | 0.659                          | 1336.39            | 880.37             | 0.345                          | 1143.15            | 394.38             |
| A_68_P30245925 | chr15:57908333-57908377                           | NM_001042438:-310  | Zhx1       | PROMOTER               | 0.401                                                        | 0.430                          | 4868.91            | 2091.80            | 0.172                          | 3668.62            | 631.32             |
| A_68_P30245918 | chr15:57907631-57907675                           | NM_001042438:392   | Zhx1       | INSIDE                 | 0.401                                                        | 5.692                          | 1199.71            | 6828.30            | 2.282                          | 990.02             | 2259.41            |
| A_68_P30245926 | chr15:57908463-57908507                           | NM_001042438:-440  | Zhx1       | PROMOTER               | 0.363                                                        | 0.677                          | 1352.46            | 915.48             | 0.246                          | 996.72             | 245.05             |
| A_68_P30245927 | chr15:57908540-57908584                           | NM_001042438:-518  | Zhx1       | PROMOTER               | 0.394                                                        | 0.562                          | 953.43             | 535.40             | 0.221                          | 791.69             | 175.00             |
| A_68_P30245923 | chr15:57908171-57908215                           | NM_001042438:-148  | Zhx1       | PROMOTER               | 0.565                                                        | 0.546                          | 886.61             | 484.14             | 0.309                          | 802.31             | 247.56             |

| ProbeName      | Target position of probe on CpG island microarray | TargetID          | GeneSymbol | CpG island Description | Ratio of relative methylation (TiO <sub>2</sub> -NP/Vehicle) | Sham group                     |                    |                    | TiO <sub>2</sub> -H group      |                    |                    |
|----------------|---------------------------------------------------|-------------------|------------|------------------------|--------------------------------------------------------------|--------------------------------|--------------------|--------------------|--------------------------------|--------------------|--------------------|
|                |                                                   |                   |            |                        |                                                              | Relative methylation (Cy5/Cy3) | Cy3 signal (Input) | Cy5 signal (MeDIP) | Relative methylation (Cy5/Cy3) | Cy3 signal (Input) | Cy5 signal (MeDIP) |
| A_68_P30243549 | chr15:57526400-57526444                           | NM_199449:201     | Zhx2       | INSIDE                 | 0.562                                                        | 7.089                          | 1327.69            | 9412.04            | 3.983                          | 1293.75            | 5153.26            |
| A_68_P29961928 | chr14:122873448-122873492                         | NM_009574:-1135   | Zic2       | DIVERGENT_PROMOTER     | 0.604                                                        | 0.228                          | 2511.84            | 571.86             | 0.138                          | 2225.37            | 306.16             |
| A_68_P32403976 | chrX:55291949-55291993                            | NM_009575:8166    | Zic3       | DOWNSTREAM             | 0.563                                                        | 3.678                          | 1336.91            | 4917.67            | 2.071                          | 1651.21            | 3420.18            |
| A_68_P26721663 | chr9:91278946-91278990                            | NM_009576:15159   | Zic4       | INSIDE                 | 0.296                                                        | 10.992                         | 800.65             | 8800.42            | 3.25                           | 660.80             | 2147.93            |
| A_68_P24966280 | chr7:11080607-11080656                            | NM_009577:99      | Zik1       | INSIDE                 | 0.321                                                        | 0.295                          | 2470.30            | 728.06             | 0.095                          | 1811.96            | 171.52             |
| A_68_P24956426 | chr7:6649059-6649103                              | NM_011769:63      | Zim1       | INSIDE                 | 0.59                                                         | 0.627                          | 1814.77            | 1137.60            | 0.37                           | 1559.31            | 576.39             |
| A_68_P22953710 | chr4:58956479-58956523                            | NM_001099323:1    | Zkscan16   | INSIDE                 | 0.409                                                        | 0.465                          | 1117.49            | 520.17             | 0.19                           | 934.25             | 177.80             |
| A_68_P22953712 | chr4:58956665-58956709                            | NM_001099323:187  | Zkscan16   | INSIDE                 | 0.555                                                        | 4.085                          | 1525.46            | 6230.94            | 2.268                          | 1295.60            | 2938.35            |
| A_68_P27837321 | chr11:59319755-59319799                           | NM_001130529:366  | Zkscan17   | INSIDE                 | 0.541                                                        | 0.425                          | 1461.94            | 621.91             | 0.23                           | 1028.74            | 236.60             |
| A_68_P28872660 | chr13:21494324-21494368                           | NM_001145778:278  | Zkscan3    | INSIDE                 | 0.352                                                        | 0.590                          | 1925.17            | 1136.24            | 0.208                          | 1451.63            | 301.52             |
| A_68_P32674751 | chrX:131543547-131543591                          | NM_175446:180     | Zmat1      | INSIDE                 | 0.524                                                        | 40.111                         | 3521.20            | 141237.30          | 21.019                         | 3919.63            | 82387.01           |
| A_68_P32674749 | chrX:131543372-131543416                          | NM_175446:354     | Zmat1      | INSIDE                 | 0.667                                                        | 4.035                          | 435.75             | 1758.39            | 2.69                           | 632.93             | 1702.58            |
| A_68_P29478601 | chr14:26427680-26427724                           | NM_183208:149032  | Zmiz1      | INSIDE                 | 0.322                                                        | 9.180                          | 2487.28            | 22832.59           | 2.957                          | 2013.49            | 5953.76            |
| A_68_P32564024 | chrX:98615209-98615253                            | NM_001177985:23   | Zmym3      | INSIDE                 | 0.476                                                        | 5.288                          | 491.12             | 2597.15            | 2.518                          | 658.60             | 1658.25            |
| A_68_P32564025 | chrX:98615354-98615398                            | NM_001177985:-123 | Zmym3      | PROMOTER               | 0.421                                                        | 3.518                          | 958.20             | 3371.01            | 1.483                          | 1176.17            | 1743.94            |
| A_68_P23282960 | chr4:126645057-126645101                          | NM_001114399:89   | Zmym4      | INSIDE                 | 0.467                                                        | 3.769                          | 2182.81            | 8227.52            | 1.76                           | 2099.61            | 3695.66            |
| A_68_P23282958 | chr4:126644783-126644827                          | NM_001114399:363  | Zmym4      | INSIDE                 | 0.572                                                        | 8.598                          | 4294.76            | 36927.70           | 4.917                          | 3776.01            | 18565.30           |
| A_68_P28818477 | chr13:9763394-9763438                             | NM_001199141:1144 | Zmynd11    | INSIDE                 | 0.304                                                        | 6.989                          | 2045.03            | 14293.39           | 2.123                          | 1775.82            | 3769.94            |
| A_68_P21826274 | chr2:165671183-165671231                          | NM_027230:38982   | Zmynd8     | INSIDE                 | 0.562                                                        | 2.986                          | 1104.63            | 3298.67            | 1.679                          | 685.34             | 1150.61            |
| A_68_P21911521 | chr2:181327466-181327510                          | NM_001164597:-322 | Znf512b    | PROMOTER               | 0.34                                                         | 10.186                         | 1400.03            | 14261.33           | 3.46                           | 1311.09            | 4535.87            |
| A_68_P21911518 | chr2:181326975-181327019                          | NM_001164597:170  | Znf512b    | INSIDE                 | 0.631                                                        | 10.607                         | 1022.62            | 10846.77           | 6.689                          | 992.12             | 6635.95            |
| A_68_P31932458 | chr19:6061153-6061197                             | NM_013859:-32     | Znhit2-ps  | PROMOTER               | 0.353                                                        | 0.341                          | 1875.32            | 640.29             | 0.121                          | 1461.78            | 176.36             |
| A_68_P27980352 | chr11:84729732-84729776                           | NM_001005223:104  | Znhit3     | INSIDE                 | 0.588                                                        | 0.659                          | 3790.63            | 2497.74            | 0.387                          | 2877.36            | 1113.95            |
| A_68_P27563479 | chr11:5344842-5344886                             | NM_001080924:-14  | Znrf3      | PROMOTER               | 0.146                                                        | 11.768                         | 3101.91            | 36504.15           | 1.713                          | 2643.88            | 4530.14            |
| A_68_P27563481 | chr11:5345058-5345102                             | NM_001080924:-230 | Znrf3      | PROMOTER               | 0.506                                                        | 0.238                          | 4336.98            | 1033.23            | 0.12                           | 3024.56            | 364.35             |
| A_68_P31256671 | chr17:56651263-56651307                           | NM_011483:622     | Znrf4      | INSIDE                 | 0.516                                                        | 5.782                          | 1417.70            | 8196.64            | 2.985                          | 1129.25            | 3370.97            |
| A_68_P28057142 | chr11:98412381-98412425                           | NM_001166494:-8   | Zpbp2      | DIVERGENT_PROMOTER     | 0.378                                                        | 18.905                         | 3602.38            | 68103.84           | 7.148                          | 3296.85            | 23566.15           |
| A_68_P28057144 | chr11:98412585-98412629                           | NM_001166494:196  | Zpbp2      | INSIDE                 | 0.644                                                        | 0.183                          | 2926.84            | 535.78             | 0.118                          | 2291.00            | 270.08             |
| A_68_P28872465 | chr13:21454901-21454949                           | NM_016684:236     | Zscan12    | INSIDE                 | 0.539                                                        | 7.835                          | 235.43             | 1844.67            | 4.22                           | 240.82             | 1016.21            |
| A_68_P25269100 | chr7:88020745-88020789                            | NM_009553:13773   | Zscan2     | INSIDE                 | 0.461                                                        | 5.377                          | 1034.82            | 5563.89            | 2.479                          | 794.04             | 1968.41            |
| A_68_P23231372 | chr4:116550094-116550138                          | NM_001029912:110  | Zswim5     | INSIDE                 | 0.607                                                        | 6.159                          | 2895.89            | 17836.71           | 3.736                          | 2342.00            | 8750.24            |
| A_68_P29308210 | chr13:108681440-108681484                         | NM_145456:-1204   | Zswim6     | PROMOTER               | 0.169                                                        | 17.018                         | 1274.94            | 21697.33           | 2.882                          | 1146.83            | 3304.62            |
| A_68_P29308200 | chr13:108680217-108680261                         | NM_145456:20      | Zswim6     | INSIDE                 | 0.589                                                        | 6.191                          | 1222.47            | 7568.90            | 3.647                          | 1154.99            | 4212.69            |
| A_68_P29308203 | chr13:108680619-108680663                         | NM_145456:-382    | Zswim6     | PROMOTER               | 0.624                                                        | 0.576                          | 11774.47           | 6782.52            | 0.359                          | 7516.87            | 2701.47            |
| A_68_P27054330 | chr10:33670738-33670782                           | NM_028287:258     | Zufsp      | INSIDE                 | 0.3                                                          | 0.540                          | 1362.95            | 735.67             | 0.162                          | 1060.42            | 171.70             |
| A_68_P26495379 | chr9:48863756-48863800                            | NM_012039:93      | Zw10       | INSIDE                 | 0.637                                                        | 0.485                          | 1510.54            | 732.02             | 0.309                          | 1208.78            | 373.30             |
| A_68_P24631969 | chr6:90320325-90320370                            | NM_030260:860     | Zxdc       | INSIDE                 | 0.517                                                        | 0.430                          | 1236.83            | 531.50             | 0.222                          | 969.17             | 215.44             |
| A_68_P24631961 | chr6:90319416-90319460                            | NM_030260:-49     | Zxdc       | PROMOTER               | 0.282                                                        | 5.527                          | 1505.56            | 8321.12            | 1.56                           | 1240.83            | 1935.08            |
| A_68_P23195047 | chr4:107889859-107889903                          | NM_001167936:647  | Zyg11a     | INSIDE                 | 0.176                                                        | 23.274                         | 13940.83           | 324454.60          | 4.088                          | 13191.37           | 53932.38           |
| A_68_P23195054 | chr4:107890703-107890747                          | NM_001167936:-197 | Zyg11a     | PROMOTER               | 0.359                                                        | 1.705                          | 8237.25            | 14046.49           | 0.612                          | 5763.79            | 3529.03            |
| A_68_P24397781 | chr6:42299527-42299571                            | NM_011777:-278    | Zyx        | PROMOTER               | 0.497                                                        | 0.550                          | 1090.25            | 599.96             | 0.274                          | 836.90             | 228.96             |
