# Supplementary material for: Effects of Prenatal Exposure to Titanium Dioxide Nanoparticles on DNA Methylation and Gene Expression Profile in the Mouse Brain
Source: PubMed Central journal article supplement (PMC8915839; doi:10.3389/ftox.2021.705910), 2021-10-08
Supplement: Table6.pdf [file Table6.pdf]

**Supplementary Table 6. The genes of which DNA methylation were increased in the brain of female offspring prenatally exposed to TiO<sub>2</sub>-NP.**

| ProbeName      | Target position of probe on CpG island microarray | TargetID         | GeneSymbol     | CpG island Description | Ratio of relative methylation (TiO <sub>2</sub> -NP/Vehicle) | Sham group                     |                    |                    | TiO <sub>2</sub> -H group      |                    |                    |
|----------------|---------------------------------------------------|------------------|----------------|------------------------|--------------------------------------------------------------|--------------------------------|--------------------|--------------------|--------------------------------|--------------------|--------------------|
|                |                                                   |                  |                |                        |                                                              | Relative methylation (Cy5/Cy3) | Cy3 signal (Input) | Cy5 signal (MeDIP) | Relative methylation (Cy5/Cy3) | Cy3 signal (Input) | Cy5 signal (MeDIP) |
| A_68_P28202486 | chr12:4824316-4824360                             | NM_025323:-75    | 0610009D07Rik  | PROMOTER               | 2.066                                                        | 5.998                          | 7074.81            | 42438.20           | 12.391                         | 5053.47            | 62617.15           |
| A_68_P28183963 | chr11:120210170-120210214                         | NR_038126:201    | 0610009L18Rik  | INSIDE                 | 1.932                                                        | 3.213                          | 1826.02            | 5866.26            | 6.205                          | 1558.40            | 9670.64            |
| A_68_P27646748 | chr11:23533451-23533495                           | NM_027860:159    | 0610010F05Rik  | INSIDE                 | 1.632                                                        | 2.999                          | 1129.84            | 3388.09            | 4.894                          | 941.33             | 4606.87            |
| A_68_P24541220 | chr6:72297774-72297818                            | NM_026696:486    | 0610030E20Rik  | INSIDE                 | 1.610                                                        | 5.030                          | 3501.90            | 17613.89           | 8.096                          | 2811.14            | 22758.40           |
| A_68_P21813623 | chr2:163470481-163470525                          | NR_028113:-83    | 0610039K10Rik  | PROMOTER               | 2.030                                                        | 6.080                          | 3175.66            | 19308.06           | 12.340                         | 2365.83            | 29194.46           |
| A_68_P28195044 | chr12:3426740-3426784                             | NR_030694:-15    | 1110002L01Rik  | DIVERGENT_PROMOTER     | 2.044                                                        | 6.470                          | 2368.60            | 15325.50           | 13.224                         | 1639.16            | 21676.61           |
| A_68_P23756659 | chr5:65883667-65883711                            | NM_133697:386    | 1110003E01Rik  | INSIDE                 | 1.599                                                        | 1.904                          | 7260.24            | 13825.18           | 3.044                          | 6186.80            | 18835.45           |
| A_68_P29023967 | chr13:49311401-49311447                           | NM_026738:-29    | 1110007C09Rik  | PROMOTER               | 1.828                                                        | 3.956                          | 6255.04            | 24744.55           | 7.232                          | 4536.90            | 32809.15           |
| A_68_P24039805 | chr5:121062634-121062678                          | NM_029096:-58    | 1110008J03Rik  | DIVERGENT_PROMOTER     | 1.649                                                        | 3.998                          | 7528.67            | 30096.70           | 6.591                          | 5424.59            | 35755.07           |
| A_68_P31306319 | chr17:66798578-66798622                           | NM_001114098:490 | 1110012J17Rik  | INSIDE                 | 2.195                                                        | 10.809                         | 9897.40            | 106984.90          | 23.727                         | 6523.10            | 154776.90          |
| A_68_P22217916 | chr3:68673757-68673801                            | NM_001167996:271 | 1110032F04Rik  | INSIDE                 | 1.663                                                        | 3.292                          | 653.04             | 2149.81            | 5.475                          | 646.53             | 3539.97            |
| A_68_P28513315 | chr12:70299066-70299110                           | NM_027269:328    | 1110034A24Rik  | INSIDE                 | 1.692                                                        | 2.946                          | 4125.79            | 12154.63           | 4.984                          | 3535.00            | 17617.39           |
| A_68_P21641570 | chr2:132512792-132512837                          | NM_028637:-3204  | 1110034G24Rik  | PROMOTER               | 1.858                                                        | 6.225                          | 4805.88            | 29915.80           | 11.569                         | 3480.64            | 40266.74           |
| A_68_P23331577 | chr4:135543069-135543113                          | NM_025411:69     | 1110049F12Rik  | INSIDE                 | 1.553                                                        | 3.233                          | 1282.56            | 4146.47            | 5.022                          | 1113.13            | 5590.41            |
| A_68_P30608335 | chr16:24393852-24393896                           | NR_037954:-133   | 1110054M08Rik  | PROMOTER               | 1.556                                                        | 4.325                          | 927.24             | 4009.93            | 6.729                          | 797.55             | 5366.96            |
| A_68_P27633577 | chr11:20730971-20731015                           | NM_173752:119    | 1110067D22Rik  | INSIDE                 | 1.740                                                        | 5.809                          | 1800.24            | 10457.74           | 10.107                         | 1463.09            | 14786.97           |
| A_68_P24864304 | chr6:134878874-134878918                          | NR_037955:-213   | 1190002F15Rik  | PROMOTER               | 1.710                                                        | 3.687                          | 1160.62            | 4279.02            | 6.305                          | 851.08             | 5366.07            |
| A_68_P29750657 | chr14:79700949-79700993                           | NM_025427:472    | 1190002H23Rik  | INSIDE                 | 2.094                                                        | 3.449                          | 1577.46            | 5439.92            | 7.221                          | 1229.53            | 8878.49            |
| A_68_P27914868 | chr11:72861634-72861678                           | NM_025818:288    | 1200014J11Rik  | INSIDE                 | 1.508                                                        | 2.998                          | 3522.26            | 10560.49           | 4.520                          | 2793.53            | 12627.23           |
| A_68_P27921682 | chr11:74463075-74463119                           | NM_001081158:100 | 1300001H01Rik  | INSIDE                 | 2.088                                                        | 2.414                          | 680.04             | 1641.56            | 5.039                          | 534.85             | 2695.16            |
| A_68_P27921681 | chr11:74462947-74462991                           | NM_001081158:-28 | 1300001H01Rik  | PROMOTER               | 1.974                                                        | 4.812                          | 4348.74            | 20926.06           | 9.500                          | 3488.37            | 33138.09           |
| A_68_P30594370 | chr16:21794748-21794792                           | NR_037957:351    | 1300002E11Rik  | INSIDE                 | 1.871                                                        | 2.126                          | 2580.94            | 5487.07            | 3.977                          | 1897.25            | 7546.25            |
| A_68_P24050005 | chr5:122821860-122821904                          | NM_026883:90     | 1500011H22Rik  | INSIDE                 | 1.632                                                        | 2.350                          | 644.45             | 1514.69            | 3.835                          | 582.15             | 2232.74            |
| A_68_P30650943 | chr16:32099956-32100000                           | NM_025892:91     | 1500031L02Rik  | INSIDE                 | 2.348                                                        | 3.775                          | 7748.81            | 29255.63           | 8.866                          | 5745.28            | 50940.39           |
| A_68_P23227949 | chr4:115817024-115817068                          | NM_026547:175    | 1520402A15Rik  | INSIDE                 | 1.548                                                        | 3.087                          | 1615.03            | 4985.29            | 4.777                          | 1317.12            | 6292.45            |
| A_68_P29678557 | chr14:66916156-66916200                           | NR_038077:-212   | 1700001G11Rik  | PROMOTER               | 1.657                                                        | 1.394                          | 1033.06            | 1440.07            | 2.311                          | 793.29             | 1832.91            |
| A_68_P20134295 | chr1:33727422-33727466                            | NR_033199:776    | 1700001G17Rik  | INSIDE                 | 1.808                                                        | 8.194                          | 2704.50            | 22161.41           | 14.814                         | 1913.03            | 28339.87           |
| A_68_P30387964 | chr15:83197665-83197709                           | NR_027980:41     | 1700001L05Rik  | INSIDE                 | 1.652                                                        | 4.523                          | 7085.74            | 32046.29           | 7.470                          | 5107.02            | 38149.22           |
| A_68_P21105309 | chr2:30657215-30657259                            | NM_198000:-9     | 1700001O22Rik  | PROMOTER               | 1.695                                                        | 3.081                          | 983.14             | 3028.58            | 5.223                          | 817.28             | 4268.44            |
| A_68_P26541141 | chr9:57109407-57109451                            | NM_028820:978    | 1700017B05Rik  | INSIDE                 | 2.493                                                        | 5.134                          | 2336.99            | 11998.43           | 12.798                         | 1913.17            | 24484.04           |
| A_68_P32050808 | chr19:29122130-29122174                           | NR_028360:180    | 1700018L02Rik  | INSIDE                 | 1.797                                                        | 3.071                          | 3532.99            | 10850.38           | 5.520                          | 2811.40            | 15519.09           |
| A_68_P27293831 | chr10:82275065-82275109                           | NR_038042:219    | 1700028I16Rik  | INSIDE                 | 2.437                                                        | 6.388                          | 11619.79           | 74232.92           | 15.569                         | 8124.71            | 126492.50          |
| A_68_P28450733 | chr12:56225550-56225594                           | NM_001100116:58  | 1700047I17Rik2 | INSIDE                 | 1.893                                                        | 4.739                          | 1177.94            | 5581.73            | 8.969                          | 972.67             | 8724.30            |
| A_68_P28450734 | chr12:56225622-56225666                           | NM_001100116:130 | 1700047I17Rik2 | INSIDE                 | 1.618                                                        | 5.076                          | 2323.24            | 11793.75           | 8.212                          | 1827.50            | 15006.68           |
| A_68_P28094671 | chr11:105042686-105042730                         | NR_027956:39     | 1700052K11Rik  | INSIDE                 | 1.557                                                        | 4.459                          | 593.08             | 2644.78            | 6.941                          | 610.23             | 4235.88            |
| A_68_P20893089 | chr1:185857699-185857743                          | NM_028516:157    | 1700056E22Rik  | INSIDE                 | 1.565                                                        | 3.564                          | 2094.13            | 7462.54            | 5.577                          | 1749.00            | 9754.76            |
| A_68_P20252736 | chr1:57434804-57434848                            | NM_028546:363    | 1700066M21Rik  | INSIDE                 | 2.040                                                        | 7.560                          | 1416.99            | 10712.47           | 15.420                         | 1205.70            | 18591.62           |
| A_68_P21094978 | chr2:28910349-28910393                            | NM_001166705:216 | 1700101E01Rik  | INSIDE                 | 1.506                                                        | 1.659                          | 1643.86            | 2726.81            | 2.498                          | 1408.24            | 3517.32            |
| A_68_P28104781 | chr11:106889949-106889993                         | NM_001163473:434 | 1810010H24Rik  | INSIDE                 | 1.533                                                        | 3.836                          | 1002.22            | 3844.42            | 5.880                          | 863.11             | 5074.98            |
| A_68_P23699554 | chr5:53658257-53658301                            | NM_001145433:-66 | 1810013D10Rik  | PROMOTER               | 1.512                                                        | 1.927                          | 1747.30            | 3367.67            | 2.914                          | 1494.68            | 4355.06            |
| A_68_P30394811 | chr15:84276781-84276825                           | NM_001163145:725 | 1810041L15Rik  | INSIDE                 | 1.600                                                        | 3.955                          | 1864.88            | 7375.82            | 6.327                          | 1441.31            | 9119.27            |
| A_68_P31619415 | chr18:35812025-35812069                           | NM_027222:-3025  | 2010001M09Rik  | PROMOTER               | 2.214                                                        | 6.357                          | 1547.49            | 9837.17            | 14.072                         | 1207.65            | 16994.20           |
| A_68_P24127508 | chr5:138220341-138220385                          | NM_027242:217    | 2010007H12Rik  | INSIDE                 | 1.631                                                        | 3.683                          | 2150.37            | 7919.10            | 6.005                          | 1663.78            | 9990.80            |
| A_68_P29509885 | chr14:31944046-31944090                           | NR_024069:-1952  | 2010107H07Rik  | DIVERGENT_PROMOTER     | 1.757                                                        | 3.885                          | 1220.48            | 4741.76            | 6.827                          | 944.05             | 6444.63            |
| A_68_P29509872 | chr14:31942367-31942412                           | NR_024069:-273   | 2010107H07Rik  | DIVERGENT_PROMOTER     | 1.727                                                        | 3.207                          | 2485.55            | 7970.80            | 5.539                          | 2061.63            | 11419.23           |

| ProbeName      | Target position of probe on CpG island microarray | TargetID          | GeneSymbol    | CpG island Description | Ratio of relative methylation (TiO <sub>2</sub> -NP/Vehicle) | Sham group                     |                    |                    | TiO <sub>2</sub> -H group      |                    |                    |
|----------------|---------------------------------------------------|-------------------|---------------|------------------------|--------------------------------------------------------------|--------------------------------|--------------------|--------------------|--------------------------------|--------------------|--------------------|
|                |                                                   |                   |               |                        |                                                              | Relative methylation (Cy5/Cy3) | Cy3 signal (Input) | Cy5 signal (MeDIP) | Relative methylation (Cy5/Cy3) | Cy3 signal (Input) | Cy5 signal (MeDIP) |
| A_68_P23189066 | chr4:106851077-106851121                          | NM_025617:-127    | 2210012G02Rik | DIVERGENT_PROMOTER     | 1.705                                                        | 3.272                          | 1742.72            | 5701.96            | 5.579                          | 1469.17            | 8196.62            |
| A_68_P24006959 | chr5:115392406-115392450                          | NM_028211:218     | 2210016L21Rik | INSIDE                 | 1.762                                                        | 2.075                          | 3762.48            | 7807.39            | 6.655                          | 2626.23            | 9600.08            |
| A_68_P25357073 | chr7:105804516-105804560                          | NM_172280:541     | 2210018M11Rik | INSIDE                 | 1.936                                                        | 5.040                          | 31781.32           | 160178.50          | 9.757                          | 23016.13           | 224567.40          |
| A_68_P21812641 | chr2:163298061-163298105                          | NR_028122:-198    | 2310001K24Rik | PROMOTER               | 1.603                                                        | 2.860                          | 1751.00            | 5008.06            | 4.586                          | 1461.56            | 6702.35            |
| A_68_P28184189 | chr11:120239967-120240011                         | NM_027980:72      | 2310003H01Rik | INSIDE                 | 1.540                                                        | 3.421                          | 542.84             | 1857.08            | 5.269                          | 466.14             | 2456.01            |
| A_68_P31161375 | chr17:36002953-36002997                           | NM_001146710:-98  | 2310014H01Rik | PROMOTER               | 2.081                                                        | 4.776                          | 4697.04            | 22432.44           | 9.940                          | 3457.88            | 34370.91           |
| A_68_P28613117 | chr12:88289051-88289098                           | NM_173735:782     | 2310044G17Rik | INSIDE                 | 1.794                                                        | 4.048                          | 1247.68            | 5050.33            | 7.262                          | 971.94             | 7058.25            |
| A_68_P27288028 | chr10:80657209-80657253                           | NR_015477:-205    | 2310050B05Rik | PROMOTER               | 1.765                                                        | 2.499                          | 2529.81            | 6320.77            | 4.411                          | 2017.03            | 8896.69            |
| A_68_P28182345 | chr11:119959914-119959958                         | NM_183137:109     | 2410002I01Rik | INSIDE                 | 1.626                                                        | 1.880                          | 1012.24            | 1902.83            | 3.057                          | 758.19             | 2317.78            |
| A_68_P24430828 | chr6:49023823-49023867                            | NM_029353:51      | 2410003K15Rik | INSIDE                 | 1.662                                                        | 2.935                          | 2060.46            | 6047.62            | 4.877                          | 1761.18            | 8589.71            |
| A_68_P26631268 | chr9:72951661-72951705                            | NM_025890:1478    | 2410004A20Rik | INSIDE                 | 1.622                                                        | 1.903                          | 344.84             | 656.35             | 3.086                          | 354.88             | 1095.29            |
| A_68_P31609277 | chr18:33954596-33954640                           | NR_038151:73      | 2410004N09Rik | INSIDE                 | 1.982                                                        | 1.727                          | 3048.18            | 5263.10            | 3.423                          | 2411.34            | 8253.95            |
| A_68_P28595531 | chr12:85291747-85291791                           | NM_023633:211     | 2410016O06Rik | INSIDE                 | 2.188                                                        | 2.421                          | 371.70             | 899.87             | 5.298                          | 458.78             | 2430.71            |
| A_68_P28595535 | chr12:85292140-85292184                           | NM_023633:605     | 2410016O06Rik | INSIDE                 | 1.691                                                        | 3.618                          | 1248.07            | 4515.38            | 6.118                          | 1021.70            | 6251.02            |
| A_68_P30345268 | chr15:75812328-75812373                           | NM_001163518:365  | 2410075B13Rik | INSIDE                 | 1.504                                                        | 2.082                          | 651.05             | 1355.76            | 3.133                          | 588.82             | 1844.67            |
| A_68_P31992368 | chr19:18745200-18745244                           | NM_026120:-47     | 2410127L17Rik | PROMOTER               | 1.970                                                        | 8.119                          | 1112.52            | 9032.07            | 15.996                         | 768.74             | 12296.69           |
| A_68_P23297489 | chr4:129278119-129278163                          | NM_029748:190     | 2510006D16Rik | INSIDE                 | 2.022                                                        | 9.500                          | 6864.88            | 65215.47           | 19.211                         | 6025.84            | 115762.80          |
| A_68_P30593952 | chr16:21695060-21695104                           | NM_001001881:-344 | 2510009E07Rik | PROMOTER               | 1.985                                                        | 1.567                          | 1249.70            | 1958.13            | 3.110                          | 936.20             | 2911.16            |
| A_68_P30593950 | chr16:21694881-21694925                           | NM_001001881:-164 | 2510009E07Rik | PROMOTER               | 1.503                                                        | 4.034                          | 1506.73            | 654.64             | 0.653                          | 1233.71            | 805.79             |
| A_68_P27288890 | chr10:80788199-80788243                           | NM_027381:4373    | 2510012J08Rik | INSIDE                 | 1.548                                                        | 5.347                          | 2882.86            | 15415.59           | 8.279                          | 2017.82            | 16705.88           |
| A_68_P27288853 | chr10:80783632-80783676                           | NM_027381:-193    | 2510012J08Rik | PROMOTER               | 1.516                                                        | 1.546                          | 1103.03            | 1705.68            | 2.344                          | 891.15             | 2088.80            |
| A_68_P23323199 | chr4:134066870-134066914                          | NM_001081099:-21  | 2610002D18Rik | PROMOTER               | 1.641                                                        | 3.069                          | 2082.85            | 6392.84            | 5.036                          | 1674.79            | 8433.89            |
| A_68_P26822984 | chr9:110207818-110207862                          | NM_001081381:145  | 2610002I17Rik | INSIDE                 | 1.574                                                        | 2.186                          | 1153.88            | 2522.94            | 3.441                          | 942.26             | 3242.42            |
| A_68_P32373277 | chrX:48194552-48194596                            | NM_133729:-38     | 2610018G03Rik | PROMOTER               | 1.632                                                        | 3.797                          | 920.52             | 3495.16            | 6.197                          | 695.81             | 4311.93            |
| A_68_P23820887 | chr5:77738314-77738358                            | NM_019836:775     | 2610024G14Rik | INSIDE                 | 1.511                                                        | 2.988                          | 773.65             | 2311.49            | 4.515                          | 651.71             | 2942.33            |
| A_68_P30958538 | chr16:90727762-90727806                           | NM_025642:-168    | 2610039C10Rik | PROMOTER               | 1.985                                                        | 7.148                          | 6153.67            | 43986.93           | 14.192                         | 4023.20            | 57098.84           |
| A_68_P26742258 | chr9:95412445-95412489                            | NM_001114977:-51  | 2610101N10Rik | PROMOTER               | 2.465                                                        | 9.638                          | 28756.99           | 277163.20          | 23.754                         | 16578.52           | 393802.70          |
| A_68_P27942253 | chr11:78075063-78075107                           | NM_001002004:-171 | 2610507B11Rik | PROMOTER               | 1.521                                                        | 5.560                          | 2221.97            | 12353.43           | 8.457                          | 2054.15            | 17372.83           |
| A_68_P25592704 | chr7:149246956-149247000                          | NM_028308:-39     | 2700078K21Rik | PROMOTER               | 1.672                                                        | 3.416                          | 1686.03            | 5759.23            | 5.712                          | 1471.01            | 8402.10            |
| A_68_P25592703 | chr7:149246867-149246911                          | NM_028308:51      | 2700078K21Rik | INSIDE                 | 1.505                                                        | 3.078                          | 809.83             | 2492.47            | 4.632                          | 861.56             | 3990.66            |
| A_68_P31939711 | chr19:7496090-7496134                             | NM_175381:3998    | 2700081O15Rik | INSIDE                 | 1.843                                                        | 5.555                          | 2835.16            | 15749.15           | 10.237                         | 1880.48            | 19250.76           |
| A_68_P29309087 | chr13:108834557-108834601                         | NM_001048250:-89  | 2810008M24Rik | PROMOTER               | 1.934                                                        | 4.845                          | 3948.98            | 19133.40           | 9.369                          | 3266.40            | 30603.79           |
| A_68_P20293904 | chr1:64737359-64737403                            | NR_038009:-147    | 2810408I11Rik | DIVERGENT_PROMOTER     | 1.622                                                        | 1.860                          | 1054.52            | 1961.20            | 3.017                          | 834.70             | 2518.52            |
| A_68_P25952317 | chr8:73030680-73030724                            | NM_025577:-64     | 2810428I15Rik | PROMOTER               | 1.683                                                        | 3.799                          | 2054.35            | 7803.78            | 6.392                          | 1708.79            | 10922.38           |
| A_68_P23545743 | chr5:24606691-24606735                            | NR_027851:-80     | 2900005J15Rik | DIVERGENT_PROMOTER     | 1.558                                                        | 2.903                          | 729.35             | 2117.61            | 4.523                          | 624.82             | 2825.84            |
| A_68_P31114505 | chr17:27270655-27270699                           | NM_026063:160     | 2900010M23Rik | INSIDE                 | 2.157                                                        | 9.667                          | 6284.28            | 60751.19           | 20.850                         | 4279.05            | 89217.88           |
| A_68_P27787099 | chr11:49988480-49988526                           | NM_026543:150     | 3010026O09Rik | INSIDE                 | 1.742                                                        | 1.554                          | 3080.89            | 4787.81            | 2.707                          | 2253.64            | 6101.51            |
| A_68_P20417972 | chr1:89371861-89371906                            | NM_028473:5045    | 3110079O15Rik | INSIDE                 | 2.652                                                        | 18.741                         | 968.94             | 18158.52           | 49.706                         | 756.70             | 37611.98           |
| A_68_P24135766 | chr5:139936328-139936372                          | NM_028469:138     | 3110082I17Rik | INSIDE                 | 1.502                                                        | 1.936                          | 4745.40            | 9185.42            | 2.908                          | 3667.44            | 10663.21           |
| A_68_P21812328 | chr2:163244957-163245001                          | NM_025699:228     | 3230401D17Rik | INSIDE                 | 1.881                                                        | 7.426                          | 2014.28            | 14958.86           | 13.971                         | 1569.90            | 21933.65           |
| A_68_P29049835 | chr13:54605357-54605401                           | NM_176987:213     | 4732471D19Rik | INSIDE                 | 1.906                                                        | 4.028                          | 1786.81            | 7197.41            | 7.678                          | 1384.65            | 10630.74           |
| A_68_P28706885 | chr12:106248338-106248382                         | NM_172500:-341    | 4831426I19Rik | PROMOTER               | 1.712                                                        | 5.463                          | 6987.51            | 38171.76           | 9.353                          | 5071.87            | 47438.28           |
| A_68_P31679073 | chr18:47009821-47009865                           | NM_029008:150     | 4833403I15Rik | INSIDE                 | 1.530                                                        | 1.493                          | 1261.63            | 1883.79            | 2.284                          | 1016.66            | 2322.55            |
| A_68_P29050103 | chr13:54666500-54666544                           | NM_133797:221     | 4833439L19Rik | INSIDE                 | 1.608                                                        | 6.099                          | 2522.42            | 15383.10           | 9.808                          | 1975.41            | 19375.44           |
| A_68_P30560722 | chr16:14159381-14159425                           | NM_001081154:-35  | 4921513D23Rik | DIVERGENT_PROMOTER     | 1.575                                                        | 3.794                          | 13836.62           | 52494.04           | 5.973                          | 8244.00            | 49245.55           |
| A_68_P21770588 | chr2:156137716-156137760                          | NM_027585:-470    | 4921517L17Rik | PROMOTER               | 1.524                                                        | 2.899                          | 1622.43            | 4703.88            | 4.418                          | 1472.90            | 6507.65            |
| A_68_P27289148 | chr10:80827041-80827085                           | NM_001014836:1503 | 4930404N11Rik | INSIDE                 | 1.964                                                        | 4.488                          | 7214.34            | 32377.00           | 8.812                          | 5305.63            | 46755.12           |

| ProbeName      | Target position of probe on CpG island microarray | TargetID          | GeneSymbol    | CpG island Description | Ratio of relative methylation (TiO <sub>2</sub> -NP/Vehicle) | Sham group                     |                    |                    | TiO <sub>2</sub> -H group      |                    |                    |
|----------------|---------------------------------------------------|-------------------|---------------|------------------------|--------------------------------------------------------------|--------------------------------|--------------------|--------------------|--------------------------------|--------------------|--------------------|
|                |                                                   |                   |               |                        |                                                              | Relative methylation (Cy5/Cy3) | Cy3 signal (Input) | Cy5 signal (MeDIP) | Relative methylation (Cy5/Cy3) | Cy3 signal (Input) | Cy5 signal (MeDIP) |
| A_68_P21042876 | chr2:18919881-18919925                            | NR_024323:-43     | 4930426L09Rik | DIVERGENT_PROMOTER     | 1.977                                                        | 7.301                          | 2991.97            | 21843.57           | 14.432                         | 2189.70            | 31602.67           |
| A_68_P26018418 | chr8:86671979-86672023                            | NM_001163752:64   | 4930432K21Rik | INSIDE                 | 1.628                                                        | 2.483                          | 2729.10            | 6776.31            | 4.043                          | 2053.68            | 8303.57            |
| A_68_P30686476 | chr16:38522756-38522801                           | NM_024273:-31     | 4930455C21Rik | PROMOTER               | 1.945                                                        | 6.413                          | 5617.05            | 36021.49           | 12.474                         | 3776.73            | 47112.65           |
| A_68_P23062804 | chr4:83171213-83171257                            | NM_001081012:-214 | 4930473A06Rik | PROMOTER               | 1.509                                                        | 2.827                          | 912.04             | 2578.63            | 4.268                          | 849.60             | 3625.74            |
| A_68_P31122921 | chr17:28660085-28660129                           | NM_026290:-7699   | 4930511I11Rik | PROMOTER               | 2.032                                                        | 1.699                          | 1585.67            | 2693.97            | 3.452                          | 1228.85            | 4241.70            |
| A_68_P26085413 | chr8:98330883-98330927                            | NR_015574:175     | 4930513N10Rik | INSIDE                 | 2.426                                                        | 7.226                          | 17038.37           | 123120.90          | 17.533                         | 11905.60           | 208738.70          |
| A_68_P33007146 | chr9_random:49897-49941                           | NR_015516:-3490   | 4930526I15Rik | PROMOTER               | 3.692                                                        | 6.288                          | 3418.87            | 21499.06           | 23.215                         | 2298.35            | 53355.95           |
| A_68_P33007145 | chr9_random:49764-49808                           | NR_015516:-3622   | 4930526I15Rik | PROMOTER               | 2.796                                                        | 13.504                         | 11845.74           | 159960.60          | 37.756                         | 6253.91            | 236121.30          |
| A_68_P33007144 | chr9_random:49674-49720                           | NR_015516:-3712   | 4930526I15Rik | PROMOTER               | 2.238                                                        | 20.949                         | 646.83             | 13550.10           | 46.880                         | 431.58             | 20232.68           |
| A_68_P33012155 | chr9_random:54509-54553                           | NR_027950:-162    | 4930526I15Rik | PROMOTER               | 1.961                                                        | 3.299                          | 5356.65            | 17673.86           | 6.469                          | 3968.95            | 25675.00           |
| A_68_P33012150 | chr9_random:53992-54036                           | NR_027950:-678    | 4930526I15Rik | PROMOTER               | 1.803                                                        | 7.605                          | 24634.84           | 187359.00          | 13.714                         | 15139.21           | 207618.50          |
| A_68_P33012156 | chr9_random:54584-54628                           | NR_027950:-86     | 4930526I15Rik | PROMOTER               | 1.535                                                        | 1.664                          | 567.58             | 944.36             | 2.554                          | 454.38             | 1160.30            |
| A_68_P22552055 | chr3:135101078-135101122                          | NR_030689:529     | 4930539J05Rik | INSIDE                 | 1.649                                                        | 3.525                          | 946.20             | 3335.59            | 5.813                          | 843.84             | 4905.36            |
| A_68_P22129414 | chr3:51200267-51200311                            | NM_026358:181     | 4930583H14Rik | INSIDE                 | 1.544                                                        | 6.105                          | 1129.35            | 6894.20            | 9.424                          | 898.09             | 8463.53            |
| A_68_P30959222 | chr16:90831079-90831123                           | NM_001199210:-3   | 4931408A02Rik | PROMOTER               | 1.967                                                        | 1.517                          | 905.38             | 1373.80            | 2.985                          | 747.69             | 2231.93            |
| A_68_P22200394 | chr3:65333128-65333172                            | NR_027955:186     | 4931440P22Rik | INSIDE                 | 1.584                                                        | 2.219                          | 2078.16            | 4610.97            | 3.514                          | 1826.35            | 6418.43            |
| A_68_P22060448 | chr3:36762071-36762115                            | NM_172679:65      | 4932438A13Rik | INSIDE                 | 1.952                                                        | 2.163                          | 1441.07            | 3116.81            | 4.222                          | 1152.18            | 4864.87            |
| A_68_P23588493 | chr5:33721117-33721161                            | NM_001081101:-206 | 4933407H18Rik | PROMOTER               | 1.924                                                        | 5.062                          | 8181.42            | 41417.93           | 9.741                          | 5614.39            | 54690.28           |
| A_68_P25834612 | chr8:47248897-47248941                            | NM_025747:-5991   | 4933411K20Rik | PROMOTER               | 1.537                                                        | 1.755                          | 5189.64            | 9109.37            | 2.698                          | 4110.67            | 11092.42           |
| A_68_P27842891 | chr11:60230619-60230663                           | NM_025757:-6      | 4933439F18Rik | DIVERGENT_PROMOTER     | 2.001                                                        | 5.082                          | 6324.86            | 32141.10           | 10.170                         | 4611.32            | 46897.03           |
| A_68_P27842896 | chr11:60231205-60231249                           | NM_025757:580     | 4933439F18Rik | INSIDE                 | 1.941                                                        | 6.392                          | 6265.28            | 40045.30           | 12.409                         | 5241.96            | 65047.20           |
| A_68_P22130346 | chr3:51364011-51364056                            | NR_033624:355     | 5031434O11Rik | INSIDE                 | 1.960                                                        | 3.201                          | 3208.33            | 10271.15           | 6.274                          | 2445.68            | 15345.16           |
| A_68_P21745337 | chr2:151528077-151528121                          | NM_001160363:355  | 5430405G05Rik | INSIDE                 | 1.617                                                        | 12.534                         | 2185.05            | 27386.41           | 20.261                         | 1693.22            | 34306.73           |
| A_68_P23929552 | chr5:100858837-100858881                          | NR_034038:-304    | 5430416N02Rik | PROMOTER               | 1.598                                                        | 4.386                          | 2091.10            | 9170.96            | 7.010                          | 1771.53            | 12417.68           |
| A_68_P24449884 | chr6:52266647-52266691                            | NR_038163:-1842   | 5730457N03Rik | PROMOTER               | 2.474                                                        | 11.257                         | 8241.17            | 92768.87           | 27.844                         | 5150.16            | 143401.90          |
| A_68_P20644756 | chr1:138131091-138131135                          | NM_028872:-271    | 5730559C18Rik | PROMOTER               | 2.054                                                        | 5.740                          | 1343.02            | 7709.17            | 11.789                         | 979.59             | 11548.56           |
| A_68_P24084071 | chr5:129106177-129106221                          | NR_015517:364     | 5930412G12Rik | INSIDE                 | 1.656                                                        | 2.695                          | 2040.71            | 5500.05            | 4.464                          | 1575.31            | 7032.18            |
| A_68_P26812299 | chr9:107888278-107888322                          | NM_026597:-53     | 6230427J02Rik | PROMOTER               | 3.211                                                        | 41.034                         | 2065.67            | 84762.66           | 131.746                        | 820.78             | 108134.90          |
| A_68_P20876216 | chr1:182413344-182413388                          | NM_001081227:269  | 6330403A02Rik | INSIDE                 | 1.559                                                        | 1.478                          | 4002.81            | 5914.28            | 2.304                          | 3159.73            | 7278.97            |
| A_68_P32151692 | chr19:47806456-47806500                           | NM_026377:233     | 6330577E15Rik | INSIDE                 | 1.543                                                        | 4.098                          | 11852.91           | 48570.74           | 6.323                          | 7969.21            | 50392.81           |
| A_68_P20153982 | chr1:37486790-37486834                            | NM_198006:136     | 6330578E17Rik | INSIDE                 | 1.695                                                        | 2.028                          | 3468.44            | 7034.36            | 3.437                          | 2727.80            | 9375.07            |
| A_68_P24127315 | chr5:138182692-138182736                          | NM_175521:-1488   | 6430598A04Rik | DIVERGENT_PROMOTER     | 1.712                                                        | 3.004                          | 1293.54            | 3886.35            | 5.143                          | 1008.95            | 5189.40            |
| A_68_P24760447 | chr6:113554719-113554763                          | NM_133937:-25     | 6720456B07Rik | DIVERGENT_PROMOTER     | 1.729                                                        | 29.247                         | 415.36             | 12148.19           | 50.565                         | 408.90             | 20675.97           |
| A_68_P29587993 | chr14:49066241-49066285                           | NM_172600:236     | 6720456H20Rik | INSIDE                 | 1.537                                                        | 2.300                          | 2572.13            | 5914.65            | 3.534                          | 2101.71            | 7427.21            |
| A_68_P21754954 | chr2:153270097-153270141                          | NM_001001986:97   | 8430427H17Rik | INSIDE                 | 2.028                                                        | 6.050                          | 1367.93            | 8276.38            | 12.269                         | 1143.90            | 14034.44           |
| A_68_P21755504 | chr2:153354420-153354464                          | NM_001134300:1265 | 8430427H17Rik | INSIDE                 | 1.554                                                        | 4.392                          | 2757.42            | 12109.24           | 6.824                          | 2447.02            | 16699.70           |
| A_68_P27085191 | chr10:40402970-40403014                           | NM_177793:-95     | 9030224M15Rik | PROMOTER               | 1.686                                                        | 2.249                          | 1059.70            | 2383.52            | 3.792                          | 947.30             | 3592.40            |
| A_68_P23368580 | chr4:141795400-141795444                          | NM_001109685:-106 | 9030409G11Rik | PROMOTER               | 1.540                                                        | 4.200                          | 12506.51           | 52523.82           | 6.467                          | 9077.38            | 58703.21           |
| A_68_P20250405 | chr1:57029997-57030046                            | NR_024325:1709    | 9130024F11Rik | INSIDE                 | 1.534                                                        | 1.803                          | 368.62             | 664.80             | 2.767                          | 298.59             | 826.23             |
| A_68_P23693365 | chr5:52581836-52581880                            | NR_015537:-61     | 9230114K14Rik | DIVERGENT_PROMOTER     | 2.218                                                        | 6.219                          | 1084.17            | 6742.91            | 13.793                         | 995.51             | 13731.22           |
| A_68_P28513307 | chr12:70298223-70298267                           | NR_033222:47      | 9330151L19Rik | INSIDE                 | 1.565                                                        | 5.402                          | 2373.03            | 12819.39           | 8.457                          | 1959.92            | 16574.74           |
| A_68_P21782539 | chr2:158187061-158187105                          | NR_015463:163     | 9430008C03Rik | INSIDE                 | 1.922                                                        | 4.489                          | 4847.02            | 21757.79           | 8.630                          | 4715.69            | 40694.87           |
| A_68_P21782542 | chr2:158187327-158187371                          | NR_027887:-90     | 9430008C03Rik | PROMOTER               | 1.755                                                        | 4.200                          | 1215.00            | 5103.27            | 7.372                          | 959.59             | 7073.91            |
| A_68_P31464043 | chr18:4635545-4635589                             | NM_001081963:640  | 9430020K01Rik | INSIDE                 | 1.723                                                        | 2.340                          | 2351.10            | 5500.43            | 4.031                          | 2007.10            | 8090.87            |
| A_68_P29030706 | chr13:51195741-51195786                           | NR_029463:333     | 9430083A17Rik | INSIDE                 | 1.855                                                        | 7.570                          | 295.35             | 2235.85            | 14.039                         | 200.59             | 2816.15            |
| A_68_P23562830 | chr5:28784867-28784911                            | NR_015562:-8635   | 9530036O11Rik | PROMOTER               | 1.528                                                        | 3.034                          | 425.37             | 1290.71            | 4.636                          | 458.45             | 2125.45            |
| A_68_P26890105 | chr9:122478146-122478190                          | NR_015610:-3450   | 9530059O14Rik | PROMOTER               | 1.828                                                        | 3.077                          | 1268.86            | 3904.14            | 5.625                          | 1337.99            | 7526.78            |

| ProbeName      | Target position of probe on CpG island microarray | TargetID           | GeneSymbol    | CpG island Description | Ratio of relative methylation (TiO <sub>2</sub> -NP/Vehicle) | Sham group                     |                    |                    | TiO <sub>2</sub> -H group      |                    |                    |
|----------------|---------------------------------------------------|--------------------|---------------|------------------------|--------------------------------------------------------------|--------------------------------|--------------------|--------------------|--------------------------------|--------------------|--------------------|
|                |                                                   |                    |               |                        |                                                              | Relative methylation (Cy5/Cy3) | Cy3 signal (Input) | Cy5 signal (MeDIP) | Relative methylation (Cy5/Cy3) | Cy3 signal (Input) | Cy5 signal (MeDIP) |
| A_68_P26890130 | chr9:122481560-122481604                          | NR_015610:-36      | 9530059O14Rik | PROMOTER               | 1.742                                                        | 2.246                          | 822.11             | 1846.18            | 3.911                          | 742.78             | 2905.29            |
| A_68_P26890104 | chr9:122477963-122478007                          | NR_015610:-3634    | 9530059O14Rik | PROMOTER               | 1.715                                                        | 2.017                          | 1416.52            | 2857.29            | 3.459                          | 1128.93            | 3905.17            |
| A_68_P21774858 | chr2:156866344-156866388                          | NM_001164663:38635 | 9830001H06Rik | INSIDE                 | 1.915                                                        | 3.175                          | 3202.56            | 10167.64           | 6.079                          | 2541.60            | 15449.53           |
| A_68_P21775093 | chr2:156904079-156904123                          | NM_001164663:901   | 9830001H06Rik | INSIDE                 | 1.552                                                        | 3.069                          | 1296.16            | 3978.46            | 4.764                          | 1121.73            | 5344.35            |
| A_68_P32054917 | chr19:29880262-29880306                           | NM_172836:215      | 9930021J03Rik | INSIDE                 | 2.013                                                        | 8.406                          | 1611.24            | 13543.82           | 16.922                         | 1113.14            | 18836.77           |
| A_68_P26344263 | chr9:20672999-20673043                            | NM_175687:-65      | A230050P20Rik | PROMOTER               | 1.600                                                        | 11.633                         | 911.91             | 10608.40           | 18.613                         | 684.93             | 12748.62           |
| A_68_P31961511 | chr19:12670617-12670661                           | NR_015503:418      | A330040F15Rik | INSIDE                 | 1.811                                                        | 6.470                          | 2292.64            | 14834.32           | 11.717                         | 1846.29            | 21632.64           |
| A_68_P31145425 | chr17:32533548-32533592                           | NR_029458:-6388    | A530088E08Rik | PROMOTER               | 1.578                                                        | 5.700                          | 2471.14            | 14086.48           | 8.994                          | 2301.26            | 20697.64           |
| A_68_P32775148 | chrX:155970504-155970548                          | NM_001033472:-73   | A830080D01Rik | PROMOTER               | 1.881                                                        | 4.182                          | 1734.44            | 7253.34            | 7.867                          | 1002.59            | 7887.70            |
| A_68_P23925841 | chr5:100157706-100157750                          | NR_030692:351      | A930011G23Rik | INSIDE                 | 2.022                                                        | 3.906                          | 1456.65            | 5689.62            | 7.898                          | 1228.64            | 9704.30            |
| A_68_P24513202 | chr6:65621890-65621934                            | NM_172399:308      | A930038C07Rik | INSIDE                 | 1.694                                                        | 3.364                          | 496.39             | 1669.62            | 5.697                          | 464.53             | 2646.23            |
| A_68_P22921606 | chr4:53172577-53172621                            | NM_013454:169      | Abca1         | INSIDE                 | 2.437                                                        | 2.829                          | 163.57             | 462.78             | 6.896                          | 94.45              | 651.32             |
| A_68_P21072052 | chr2:25283953-25283999                            | NM_007379:-217     | Abca2         | PROMOTER               | 1.867                                                        | 6.187                          | 1092.36            | 6758.71            | 11.554                         | 738.63             | 8533.92            |
| A_68_P28123546 | chr11:110199057-110199101                         | NM_147219:-48      | Abca5         | PROMOTER               | 1.936                                                        | 6.585                          | 5276.42            | 34744.38           | 12.751                         | 3677.97            | 46899.50           |
| A_68_P29940452 | chr14:119105540-119105584                         | NM_001033336:-121  | Abcc4         | PROMOTER               | 1.764                                                        | 1.368                          | 1461.86            | 1999.96            | 2.413                          | 1301.71            | 3141.45            |
| A_68_P30587610 | chr16:20425965-20426009                           | NM_013790:481      | Abcc5         | INSIDE                 | 1.505                                                        | 2.189                          | 1643.18            | 3597.22            | 3.294                          | 1348.96            | 4443.74            |
| A_68_P25097409 | chr7:53435456-53435500                            | NM_011510:-75      | Abcc8         | PROMOTER               | 2.095                                                        | 2.714                          | 766.06             | 2078.86            | 5.685                          | 662.42             | 3765.95            |
| A_68_P24482547 | chr6:58590413-58590457                            | NM_011920:43769    | Abcg2         | INSIDE                 | 1.934                                                        | 4.525                          | 2139.50            | 9681.96            | 8.751                          | 1636.83            | 14324.60           |
| A_68_P21741665 | chr2:150730549-150730593                          | NM_024465:-103     | Abhd12        | DIVERGENT_PROMOTER     | 1.708                                                        | 3.632                          | 2876.84            | 10449.71           | 6.204                          | 2289.56            | 14203.41           |
| A_68_P27938076 | chr11:77328807-77328851                           | NM_026185:210      | Abhd15        | INSIDE                 | 1.661                                                        | 4.965                          | 1329.88            | 6602.70            | 8.247                          | 1178.66            | 9720.12            |
| A_68_P31157497 | chr17:35226598-35226642                           | NM_178592:385      | Abhd16a       | INSIDE                 | 1.709                                                        | 2.371                          | 2002.65            | 4748.68            | 4.052                          | 1436.97            | 5822.04            |
| A_68_P20268947 | chr1:60467002-60467046                            | NM_001198570:562   | Abi2          | INSIDE                 | 2.078                                                        | 4.564                          | 2869.41            | 13096.93           | 9.483                          | 2330.68            | 22101.92           |
| A_68_P20268943 | chr1:60466325-60466369                            | NM_001198570:-116  | Abi2          | PROMOTER               | 1.847                                                        | 3.771                          | 2029.17            | 7651.42            | 6.965                          | 1746.26            | 12163.37           |
| A_68_P20268944 | chr1:60466493-60466537                            | NM_001198570:52    | Abi2          | INSIDE                 | 1.712                                                        | 4.100                          | 1797.03            | 7367.11            | 7.017                          | 1504.43            | 10555.97           |
| A_68_P21111049 | chr2:31615339-31615383                            | NM_009594:-104     | Abi1          | PROMOTER               | 1.603                                                        | 1.565                          | 1024.47            | 1603.78            | 2.510                          | 855.67             | 2147.89            |
| A_68_P31760609 | chr18:62071314-62071358                           | NM_198649:142      | Ablim3        | INSIDE                 | 1.729                                                        | 2.646                          | 1903.66            | 5036.37            | 4.575                          | 1574.24            | 7201.53            |
| A_68_P27932457 | chr11:76308492-76308536                           | NM_198018:14407    | Abr           | INSIDE                 | 1.921                                                        | 9.569                          | 21667.79           | 207339.50          | 18.381                         | 18186.63           | 334294.90          |
| A_68_P27932872 | chr11:76384849-76384893                           | NM_198895:6        | Abr           | INSIDE                 | 1.509                                                        | 1.675                          | 3476.87            | 5823.44            | 2.528                          | 2873.42            | 7262.84            |
| A_68_P24624506 | chr6:88791877-88791921                            | NM_030251:31       | Abtb1         | INSIDE                 | 2.158                                                        | 5.442                          | 15857.65           | 86291.89           | 11.741                         | 10489.90           | 123163.10          |
| A_68_P24624504 | chr6:88791715-88791759                            | NM_030251:193      | Abtb1         | INSIDE                 | 1.718                                                        | 3.548                          | 10382.55           | 36839.75           | 6.095                          | 6985.27            | 42572.99           |
| A_68_P21483989 | chr2:103406800-103406844                          | NM_178890:356      | Abtb2         | INSIDE                 | 1.762                                                        | 2.160                          | 513.43             | 1109.03            | 3.805                          | 462.30             | 1759.28            |
| A_68_P26373433 | chr9:26807126-26807170                            | NM_025862:-14      | Acad8         | DIVERGENT_PROMOTER     | 2.098                                                        | 5.345                          | 17294.92           | 92433.87           | 11.212                         | 11665.23           | 130790.60          |
| A_68_P22659834 | chr3:153607495-153607539                          | NM_007382:-120     | Acadm         | PROMOTER               | 1.924                                                        | 3.919                          | 2766.09            | 10839.68           | 7.540                          | 2240.55            | 16892.71           |
| A_68_P26521623 | chr9:53418301-53418345                            | NM_144784:133      | Acat1         | INSIDE                 | 1.541                                                        | 3.585                          | 943.56             | 3382.47            | 5.525                          | 828.27             | 4576.50            |
| A_68_P20877466 | chr1:182655892-182655936                          | NM_133225:-259     | Acdb3         | PROMOTER               | 1.597                                                        | 4.420                          | 1550.19            | 6851.39            | 7.057                          | 1414.09            | 9978.61            |
| A_68_P30481633 | chr15:99501487-99501531                           | NM_009597:360      | Aecn2         | INSIDE                 | 2.232                                                        | 1.473                          | 1396.71            | 2057.16            | 3.287                          | 1251.13            | 4112.21            |
| A_68_P28328448 | chr12:31596461-31596505                           | NM_001110239:-5    | Acp1          | DIVERGENT_PROMOTER     | 2.003                                                        | 3.807                          | 1330.58            | 5065.67            | 7.626                          | 1077.42            | 8216.80            |
| A_68_P26749720 | chr9:96790099-96790143                            | NM_153420:-279     | Acp12         | PROMOTER               | 1.664                                                        | 3.871                          | 732.83             | 2837.06            | 6.444                          | 609.12             | 3924.89            |
| A_68_P32707838 | chrX:138825108-138825152                          | NM_001033600:-52   | Acs14         | PROMOTER               | 1.774                                                        | 2.727                          | 1079.84            | 2945.22            | 4.840                          | 552.09             | 2671.95            |
| A_68_P26242187 | chr8:126416382-126416426                          | NM_009606:2232     | Acta1         | INSIDE                 | 1.864                                                        | 5.940                          | 2048.63            | 12168.98           | 11.070                         | 1536.20            | 17005.65           |
| A_68_P24153997 | chr5:143668325-143668369                          | NM_007393:57       | Actb          | INSIDE                 | 1.581                                                        | 2.044                          | 1442.49            | 2948.69            | 3.232                          | 1278.47            | 4131.59            |
| A_68_P32143654 | chr19:4646962-46470006                            | NM_016860:241      | Actr1a        | INSIDE                 | 1.549                                                        | 3.348                          | 2979.00            | 9972.94            | 5.187                          | 2460.95            | 12764.18           |
| A_68_P27630023 | chr11:20013151-20013195                           | NM_146243:-218     | Actr2         | PROMOTER               | 1.575                                                        | 4.701                          | 5876.49            | 27627.98           | 7.405                          | 4547.82            | 33674.90           |
| A_68_P20584830 | chr1:127331799-127331843                          | NM_001205385:484   | Actr3         | INSIDE                 | 1.500                                                        | 2.916                          | 7966.52            | 23227.85           | 4.375                          | 6005.45            | 26271.98           |
| A_68_P26617803 | chr9:70527024-70527068                            | NM_007399:239      | Adam10        | INSIDE                 | 1.859                                                        | 3.341                          | 3327.19            | 11116.75           | 6.210                          | 2658.10            | 16507.02           |
| A_68_P28081267 | chr11:102623133-102623177                         | NM_001110778:402   | Adam11        | INSIDE                 | 1.700                                                        | 2.010                          | 597.97             | 1201.94            | 3.417                          | 526.77             | 1799.90            |
| A_68_P23467734 | chr5:8367164-8367208                              | NM_001098225:895   | Adam22        | INSIDE                 | 1.589                                                        | 2.734                          | 1717.39            | 4695.16            | 4.344                          | 1279.99            | 5560.36            |

| ProbeName      | Target position of probe on CpG island microarray | TargetID          | GeneSymbol | CpG island Description | Ratio of relative methylation (TiO <sub>2</sub> -NP/Vehicle) | Sham group                     |                    |                    | TiO <sub>2</sub> -H group      |                    |                    |
|----------------|---------------------------------------------------|-------------------|------------|------------------------|--------------------------------------------------------------|--------------------------------|--------------------|--------------------|--------------------------------|--------------------|--------------------|
|                |                                                   |                   |            |                        |                                                              | Relative methylation (Cy5/Cy3) | Cy3 signal (Input) | Cy5 signal (MeDIP) | Relative methylation (Cy5/Cy3) | Cy3 signal (Input) | Cy5 signal (MeDIP) |
| A_68_P23467742 | chr5:8368117-8368161                              | NM_001098225:-57  | Adam22     | PROMOTER               | 1.516                                                        | 2.463                          | 690.62             | 1701.06            | 3.735                          | 631.65             | 2359.29            |
| A_68_P23467741 | chr5:8368019-8368063                              | NM_001098225:41   | Adam22     | INSIDE                 | 1.570                                                        | 1.732                          | 1004.19            | 1738.76            | 2.719                          | 921.50             | 2505.13            |
| A_68_P21633051 | chr2:130889050-130889094                          | NM_001163529:478  | Adam33     | INSIDE                 | 1.542                                                        | 2.455                          | 602.88             | 1480.03            | 3.785                          | 522.00             | 1975.90            |
| A_68_P25724843 | chr8:26127513-26127557                            | NM_007404:-140    | Adam9      | DIVERGENT_PROMOTER     | 3.403                                                        | 7.316                          | 1524.90            | 11155.47           | 24.892                         | 1145.63            | 28517.06           |
| A_68_P25724841 | chr8:26127277-26127321                            | NM_007404:96      | Adam9      | INSIDE                 | 1.608                                                        | 2.741                          | 2955.35            | 8101.89            | 4.408                          | 2472.37            | 10898.08           |
| A_68_P30931281 | chr16:85803417-85803461                           | NM_009621:-78     | Adamts1    | PROMOTER               | 1.621                                                        | 2.412                          | 1529.85            | 3690.67            | 3.912                          | 1277.02            | 4995.29            |
| A_68_P26397640 | chr9:30729401-30729445                            | NM_001024139:615  | Adamts15   | INSIDE                 | 1.736                                                        | 2.378                          | 1314.66            | 3126.25            | 4.129                          | 962.94             | 3976.27            |
| A_68_P31744348 | chr18:58995914-58995958                           | NM_175506:-481    | Adamts19   | PROMOTER               | 1.547                                                        | 1.578                          | 2334.17            | 3684.29            | 2.442                          | 2112.33            | 5158.87            |
| A_68_P23880187 | chr5:90311691-90311735                            | NM_001081401:647  | Adamts3    | INSIDE                 | 1.830                                                        | 5.079                          | 4130.18            | 20975.32           | 9.291                          | 3425.03            | 31823.61           |
| A_68_P23880193 | chr5:90312354-90312398                            | NM_001081401:-17  | Adamts3    | PROMOTER               | 1.672                                                        | 1.889                          | 2641.21            | 4989.44            | 3.159                          | 2203.61            | 6960.59            |
| A_68_P23880196 | chr5:90312755-90312799                            | NM_001081401:-417 | Adamts3    | PROMOTER               | 1.531                                                        | 3.069                          | 1012.76            | 3108.29            | 4.698                          | 777.44             | 3652.78            |
| A_68_P30931894 | chr16:85900162-85900206                           | NM_011782:1186    | Adamts5    | INSIDE                 | 1.511                                                        | 4.290                          | 1821.56            | 7814.98            | 6.483                          | 1287.00            | 8343.12            |
| A_68_P25276873 | chr7:89483916-89483960                            | NM_001190374:-265 | AdamtsL3   | PROMOTER               | 1.957                                                        | 2.496                          | 301.10             | 751.49             | 4.885                          | 287.88             | 1406.35            |
| A_68_P25276872 | chr7:89483764-89483808                            | NM_001190374:-417 | AdamtsL3   | PROMOTER               | 1.533                                                        | 7.631                          | 1584.93            | 12094.30           | 11.695                         | 1347.21            | 15755.90           |
| A_68_P22345154 | chr3:95491735-95491779                            | NM_144899:25      | AdamtsL4   | INSIDE                 | 1.792                                                        | 1.859                          | 2073.84            | 3854.71            | 3.330                          | 1714.80            | 5711.03            |
| A_68_P27952852 | chr11:79967507-79967551                           | NM_172133:-135    | Adap2      | PROMOTER               | 1.668                                                        | 4.869                          | 1002.22            | 4879.41            | 8.122                          | 801.83             | 6512.36            |
| A_68_P24383759 | chr6:39523831-39523875                            | NM_178873:-22     | Adck2      | PROMOTER               | 1.813                                                        | 3.292                          | 2014.29            | 6630.83            | 5.969                          | 1485.03            | 8863.72            |
| A_68_P29113350 | chr13:69138021-69138065                           | NM_153534:377     | Adcy2      | INSIDE                 | 1.581                                                        | 2.342                          | 1347.48            | 3155.18            | 3.703                          | 1119.72            | 4146.15            |
| A_68_P22568795 | chr3:138105955-138105999                          | NM_007410:-151    | Adh5       | PROMOTER               | 1.639                                                        | 2.652                          | 6487.11            | 17202.67           | 4.345                          | 5103.16            | 22173.81           |
| A_68_P20633265 | chr1:136312273-136312317                          | NM_028320:251     | Adipor1    | INSIDE                 | 1.794                                                        | 4.207                          | 10396.44           | 43740.06           | 7.547                          | 7847.36            | 59223.02           |
| A_68_P20633260 | chr1:136311773-136311817                          | NM_028320:-249    | Adipor1    | PROMOTER               | 1.638                                                        | 1.899                          | 1917.94            | 3642.07            | 3.110                          | 1678.68            | 5221.19            |
| A_68_P29450509 | chr14:21871923-21871967                           | NM_134079:90      | Adk        | INSIDE                 | 2.951                                                        | 1.754                          | 1736.13            | 3045.36            | 5.176                          | 1477.41            | 7646.82            |
| A_68_P32186048 | chr19:54119950-54119994                           | NM_007417:301     | Adra2a     | INSIDE                 | 1.514                                                        | 1.870                          | 1207.84            | 2258.19            | 2.830                          | 1019.30            | 2884.49            |
| A_68_P23599458 | chr5:35621995-35622039                            | NM_007418:802     | Adra2c     | INSIDE                 | 1.684                                                        | 1.754                          | 1240.19            | 2175.88            | 2.955                          | 1041.02            | 3076.60            |
| A_68_P23599469 | chr5:35623311-35623355                            | NM_007418:2118    | Adra2c     | INSIDE                 | 1.659                                                        | 5.317                          | 1510.31            | 8030.19            | 8.822                          | 1307.97            | 11539.39           |
| A_68_P31762242 | chr18:62339733-62339777                           | NM_007420:-141    | Adrb2      | PROMOTER               | 1.736                                                        | 3.893                          | 1542.63            | 6005.45            | 6.760                          | 1271.57            | 8595.79            |
| A_68_P30375392 | chr15:80778891-80778935                           | NM_009634:-36     | Adsl       | PROMOTER               | 2.048                                                        | 5.773                          | 6612.32            | 38176.14           | 11.822                         | 4842.27            | 57243.28           |
| A_68_P28751328 | chr12:113858149-113858193                         | NM_007421:-87     | Adssl1     | PROMOTER               | 1.576                                                        | 1.860                          | 1284.81            | 2389.37            | 2.931                          | 1070.45            | 3137.30            |
| A_68_P31759815 | chr18:61946490-61946534                           | NM_178928:-196    | Afap111    | PROMOTER               | 1.592                                                        | 1.383                          | 1416.45            | 1959.53            | 2.203                          | 1122.92            | 2473.79            |
| A_68_P32443538 | chrX:66613886-66613930                            | NM_008032:403     | Aff2       | INSIDE                 | 1.504                                                        | 1.550                          | 1876.72            | 2909.56            | 2.332                          | 929.04             | 2166.58            |
| A_68_P23542143 | chr5:23988482-23988526                            | NM_139153:30510   | Agap3      | INSIDE                 | 1.733                                                        | 5.843                          | 4665.00            | 27259.61           | 10.129                         | 3513.02            | 35584.60           |
| A_68_P24357881 | chr6:34730747-34730791                            | NM_178630:337     | Agbl3      | INSIDE                 | 1.543                                                        | 3.147                          | 427.26             | 1344.79            | 4.855                          | 354.26             | 1720.04            |
| A_68_P29080191 | chr13:59658571-59658615                           | NM_023328:88      | Agtpbp1    | INSIDE                 | 1.817                                                        | 6.266                          | 4305.05            | 26975.86           | 11.388                         | 3358.48            | 38245.19           |
| A_68_P20872220 | chr1:181733104-181733148                          | NM_026375:1020    | Ahctf1     | INSIDE                 | 1.602                                                        | 2.264                          | 1393.41            | 3155.16            | 3.628                          | 1213.64            | 4402.86            |
| A_68_P26530603 | chr9:55174506-55174550                            | NM_172923:-227    | AI118078   | PROMOTER               | 1.534                                                        | 3.931                          | 1708.92            | 6717.38            | 6.028                          | 1408.98            | 8493.67            |
| A_68_P26530601 | chr9:55174289-55174334                            | NM_172923:-444    | AI118078   | PROMOTER               | 1.532                                                        | 4.214                          | 1874.00            | 7897.77            | 6.456                          | 1473.35            | 9512.37            |
| A_68_P31212432 | chr17:47605282-47605326                           | NM_145489:31717   | AI661453   | INSIDE                 | 1.613                                                        | 1.960                          | 621.47             | 1218.38            | 3.163                          | 511.78             | 1618.89            |
| A_68_P30382137 | chr15:82043157-82043202                           | NM_001207021:666  | AI848285   | INSIDE                 | 1.580                                                        | 3.256                          | 825.33             | 2687.65            | 5.144                          | 638.50             | 3284.60            |
| A_68_P24428428 | chr6:48579466-48579510                            | NR_027236:1323    | AI854703   | INSIDE                 | 1.532                                                        | 2.268                          | 658.89             | 1494.33            | 3.475                          | 601.02             | 2088.42            |
| A_68_P27103323 | chr10:43723779-43723823                           | NM_172393:852     | Aim1       | INSIDE                 | 1.535                                                        | 1.987                          | 1204.32            | 2393.59            | 3.050                          | 960.45             | 2929.32            |
| A_68_P24158559 | chr5:144670369-144670413                          | NM_001172146:318  | Aimp2      | INSIDE                 | 1.705                                                        | 4.816                          | 2415.13            | 11630.91           | 8.213                          | 2055.23            | 16879.15           |
| A_68_P32050810 | chr19:29122317-29122361                           | NM_021299:54      | Ak3        | INSIDE                 | 1.606                                                        | 6.341                          | 972.54             | 6167.01            | 10.181                         | 734.27             | 7475.93            |
| A_68_P23154895 | chr4:101091776-101091820                          | NM_001177602:-95  | Ak4        | PROMOTER               | 1.677                                                        | 3.409                          | 2375.71            | 8097.86            | 5.716                          | 1900.31            | 10862.63           |
| A_68_P23154908 | chr4:101093069-101093113                          | NM_009647:783     | Ak4        | INSIDE                 | 2.114                                                        | 2.054                          | 374.05             | 768.22             | 4.343                          | 300.11             | 1303.25            |
| A_68_P28002763 | chr11:88726023-88726068                           | NM_001042541:-145 | Akap1      | PROMOTER               | 1.574                                                        | 3.521                          | 843.99             | 2971.51            | 5.541                          | 761.65             | 4220.24            |
| A_68_P31144954 | chr17:32457616-32457660                           | NM_019774:460     | Akap8      | INSIDE                 | 2.308                                                        | 6.815                          | 5331.38            | 36334.12           | 15.732                         | 3796.01            | 59720.41           |
| A_68_P31144961 | chr17:32458430-32458474                           | NM_017476:29070   | Akap8L     | INSIDE                 | 2.604                                                        | 5.486                          | 2734.95            | 15003.88           | 14.287                         | 1952.87            | 27900.76           |

| ProbeName      | Target position of probe on CpG island microarray | TargetID            | GeneSymbol | CpG island Description | Ratio of relative methylation (TiO <sub>2</sub> -NP/Vehicle) | Sham group                     |                    |                    | TiO <sub>2</sub> -H group      |                    |                    |
|----------------|---------------------------------------------------|---------------------|------------|------------------------|--------------------------------------------------------------|--------------------------------|--------------------|--------------------|--------------------------------|--------------------|--------------------|
|                |                                                   |                     |            |                        |                                                              | Relative methylation (Cy5/Cy3) | Cy3 signal (Input) | Cy5 signal (MeDIP) | Relative methylation (Cy5/Cy3) | Cy3 signal (Input) | Cy5 signal (MeDIP) |
| A_68_P23447646 | chr5:3928274-3928318                              | NM_194462:111       | Akap9      | INSIDE                 | 1.500                                                        | 2.272                          | 1022.53            | 2322.79            | 3.408                          | 789.77             | 2691.39            |
| A_68_P23264561 | chr4:123427058-123427102                          | NM_023423:462       | Akirin1    | INSIDE                 | 1.523                                                        | 1.873                          | 844.93             | 1582.79            | 2.854                          | 666.74             | 1902.56            |
| A_68_P26057102 | chr8:93657583-93657627                            | NM_010241:1791      | Aktip      | INSIDE                 | 1.541                                                        | 3.702                          | 3600.06            | 13328.11           | 5.705                          | 2907.92            | 16588.87           |
| A_68_P31731070 | chr18:56721947-56721991                           | NM_138600:-16       | Aldh7a1    | DIVERGENT_PROMOTER     | 2.150                                                        | 8.615                          | 28263.35           | 243484.30          | 18.524                         | 18196.29           | 337068.80          |
| A_68_P31731124 | chr18:56732842-56732886                           | NM_001127338:-271   | Aldh7a1    | PROMOTER               | 1.618                                                        | 3.079                          | 4363.12            | 13433.92           | 4.981                          | 3711.04            | 18485.84           |
| A_68_P25502305 | chr7:133942445-133942489                          | NM_001177307:226    | Aldoa      | INSIDE                 | 1.805                                                        | 2.341                          | 2242.61            | 5249.11            | 4.224                          | 1800.05            | 7603.52            |
| A_68_P25708990 | chr8:23170949-23170993                            | NM_183142:-221      | Algl1      | DIVERGENT_PROMOTER     | 1.795                                                        | 2.373                          | 2983.00            | 7078.50            | 4.259                          | 2521.59            | 10738.91           |
| A_68_P32717145 | chrX:140752482-140752526                          | NM_026247:-4        | Algl3      | PROMOTER               | 2.523                                                        | 6.564                          | 4083.98            | 26807.27           | 16.561                         | 2514.84            | 41647.48           |
| A_68_P31341464 | chr17:72953935-72953979                           | NM_007439:-309      | Alk        | PROMOTER               | 1.725                                                        | 3.540                          | 6394.26            | 22635.29           | 6.108                          | 5150.08            | 31456.16           |
| A_68_P31341460 | chr17:72953599-72953644                           | NM_007439:26        | Alk        | INSIDE                 | 1.670                                                        | 1.974                          | 746.72             | 1473.91            | 3.296                          | 648.62             | 2137.91            |
| A_68_P21438176 | chr2:93816807-93816851                            | NM_026944:34059     | Alkbh3     | DOWNSTREAM             | 1.886                                                        | 5.584                          | 1256.48            | 7015.68            | 10.528                         | 1153.90            | 12148.56           |
| A_68_P31259473 | chr17:57136900-57136944                           | NM_025538:161       | Alkbh7     | INSIDE                 | 1.735                                                        | 2.983                          | 1175.23            | 3506.23            | 5.178                          | 897.02             | 4644.46            |
| A_68_P23342100 | chr4:137351824-137351868                          | NM_007431:446       | Alpl       | INSIDE                 | 1.652                                                        | 2.796                          | 617.01             | 1725.19            | 4.619                          | 533.23             | 2463.21            |
| A_68_P26826440 | chr9:110782793-110782837                          | NM_001146060:-11    | Als2cl     | PROMOTER               | 1.854                                                        | 2.810                          | 1878.69            | 5278.63            | 5.210                          | 1557.45            | 8114.97            |
| A_68_P20262088 | chr1:59177273-59177317                            | NM_001033449:-354   | Als2cr4    | PROMOTER               | 1.750                                                        | 4.488                          | 745.12             | 3344.05            | 7.854                          | 631.06             | 4956.38            |
| A_68_P27083322 | chr10:40020722-40020766                           | NM_007444:1248      | Am2        | INSIDE                 | 1.759                                                        | 1.725                          | 617.62             | 1065.22            | 3.034                          | 556.90             | 1689.59            |
| A_68_P27354277 | chr10:93002683-93002727                           | NM_027908:74        | Amdhd1     | INSIDE                 | 1.610                                                        | 2.369                          | 1000.49            | 2369.90            | 3.813                          | 822.61             | 3136.64            |
| A_68_P32710882 | chrX:139400446-139400490                          | NM_019496:803       | Ammecr1    | INSIDE                 | 1.790                                                        | 3.226                          | 976.55             | 3150.72            | 5.775                          | 511.66             | 2954.91            |
| A_68_P28743070 | chr12:112513574-112513618                         | NM_033603:4275      | Amn        | INSIDE                 | 1.565                                                        | 2.620                          | 686.38             | 1798.21            | 4.101                          | 589.50             | 2417.74            |
| A_68_P28859763 | chr13:19040669-19040713                           | NM_175007:451       | Amph       | INSIDE                 | 1.721                                                        | 4.158                          | 662.80             | 2756.07            | 7.158                          | 559.15             | 4002.62            |
| A_68_P28859761 | chr13:19040366-19040410                           | NM_175007:149       | Amph       | INSIDE                 | 1.537                                                        | 2.967                          | 5674.37            | 16838.28           | 4.562                          | 4718.16            | 21522.00           |
| A_68_P24052414 | chr5:123270992-123271036                          | NM_001042491:334    | Anapc5     | INSIDE                 | 2.546                                                        | 24.473                         | 4557.84            | 111543.90          | 62.308                         | 2482.58            | 154683.20          |
| A_68_P23447093 | chr5:3802955-3802999                              | NM_001003909:133    | Ankib1     | INSIDE                 | 2.001                                                        | 4.414                          | 2001.52            | 8835.30            | 8.832                          | 1594.37            | 14080.72           |
| A_68_P23447092 | chr5:3802834-3802878                              | NM_001003909:253    | Ankib1     | INSIDE                 | 1.703                                                        | 3.584                          | 749.53             | 2686.40            | 6.105                          | 672.66             | 4106.67            |
| A_68_P25656690 | chr8:11635804-11635848                            | NM_133971:-72       | Ankrd10    | PROMOTER               | 1.635                                                        | 2.189                          | 2794.43            | 6117.45            | 3.578                          | 2349.68            | 8407.98            |
| A_68_P26237605 | chr8:125566196-125566241                          | NM_001081379:-34    | Ankrd11    | PROMOTER               | 1.731                                                        | 2.847                          | 2956.92            | 8417.35            | 4.926                          | 2522.15            | 12425.07           |
| A_68_P22682770 | chr3:157610734-157610778                          | NM_001013806:327    | Ankrd13c   | INSIDE                 | 2.104                                                        | 9.504                          | 13866.58           | 131786.90          | 19.996                         | 9715.78            | 194280.20          |
| A_68_P22682769 | chr3:157610620-157610664                          | NM_001013806:213    | Ankrd13c   | INSIDE                 | 1.553                                                        | 4.429                          | 3140.67            | 13909.20           | 6.876                          | 2744.75            | 18872.23           |
| A_68_P31922246 | chr19:4283254-4283298                             | NM_026720:-139      | Ankrd13d   | PROMOTER               | 1.555                                                        | 3.090                          | 3143.54            | 9713.27            | 4.806                          | 2202.06            | 10583.65           |
| A_68_P29514238 | chr14:32643908-32643952                           | NM_001024604:-329   | Ankrd28    | PROMOTER               | 1.647                                                        | 1.620                          | 1147.20            | 1858.23            | 2.668                          | 1038.20            | 2770.24            |
| A_68_P25833746 | chr8:47085665-47085709                            | NM_001039562:-482   | Ankrd37    | PROMOTER               | 1.647                                                        | 2.622                          | 3555.23            | 9320.60            | 4.318                          | 2681.01            | 11575.77           |
| A_68_P25833742 | chr8:47085366-47085410                            | NM_001039562:-184   | Ankrd37    | PROMOTER               | 1.627                                                        | 1.854                          | 2843.21            | 5270.09            | 3.016                          | 2169.42            | 6542.60            |
| A_68_P27804984 | chr11:53292506-53292550                           | NM_183173:1169      | Ankrd43    | INSIDE                 | 1.545                                                        | 2.755                          | 606.94             | 1672.19            | 4.257                          | 522.39             | 2223.93            |
| A_68_P20239578 | chr1:54983378-54983422                            | NM_001081433:-169   | Ankrd44    | PROMOTER               | 2.409                                                        | 2.608                          | 6346.65            | 16554.50           | 6.284                          | 4761.34            | 29920.98           |
| A_68_P22069519 | chr3:38383514-38383558                            | NM_001167883:202    | Ankrd50    | INSIDE                 | 1.621                                                        | 3.267                          | 2974.55            | 9716.58            | 5.297                          | 2486.82            | 13171.62           |
| A_68_P23897553 | chr5:93473897-93473941                            | NM_175270:130       | Ankrd56    | INSIDE                 | 1.968                                                        | 1.785                          | 1103.52            | 1970.25            | 3.513                          | 847.35             | 2977.09            |
| A_68_P32321491 | chrX:34588512-34588556                            | NM_173779:-305      | Ankrd58    | PROMOTER               | 1.991                                                        | 3.764                          | 4900.57            | 18445.54           | 7.492                          | 3053.16            | 22875.36           |
| A_68_P31119196 | chr17:28046558-28046602                           | NM_181413:296       | Anks1      | INSIDE                 | 1.936                                                        | 1.807                          | 794.26             | 1435.62            | 3.500                          | 648.57             | 2270.05            |
| A_68_P27338390 | chr10:90291759-90291803                           | NM_001177396:252345 | Anks1b     | INSIDE                 | 2.245                                                        | 4.521                          | 1258.95            | 5692.26            | 10.151                         | 946.42             | 9607.50            |
| A_68_P27338392 | chr10:90291975-90292019                           | NM_001177396:252561 | Anks1b     | INSIDE                 | 1.702                                                        | 6.325                          | 1696.69            | 10730.82           | 10.766                         | 1448.83            | 15598.30           |
| A_68_P30459959 | chr15:95620940-95620984                           | NM_175344:-311      | Ano6       | PROMOTER               | 1.925                                                        | 3.162                          | 2819.28            | 8914.46            | 6.086                          | 2292.31            | 13950.27           |
| A_68_P25957034 | chr8:74004823-74004867                            | NM_001164679:5122   | Ano8       | INSIDE                 | 1.543                                                        | 4.355                          | 2896.34            | 12613.58           | 6.719                          | 2375.92            | 15964.47           |
| A_68_P26569971 | chr9:62191474-62191518                            | NM_009672:2347      | Anp32a     | INSIDE                 | 1.888                                                        | 1.626                          | 2462.56            | 4004.47            | 3.070                          | 2044.89            | 6278.80            |
| A_68_P26569977 | chr9:62192249-62192293                            | NM_009672:3121      | Anp32a     | INSIDE                 | 1.503                                                        | 1.406                          | 1688.30            | 2373.21            | 2.113                          | 1514.34            | 3199.71            |
| A_68_P22888792 | chr4:46464440-46464484                            | NM_130889:474       | Anp32b     | INSIDE                 | 1.720                                                        | 3.243                          | 3492.38            | 11327.10           | 5.578                          | 2955.22            | 16483.79           |
| A_68_P27560706 | chr11:4886974-4887018                             | NM_007454:89        | Ap1b1      | INSIDE                 | 1.845                                                        | 5.714                          | 2772.77            | 15842.99           | 10.541                         | 2186.53            | 23047.61           |
| A_68_P25960292 | chr8:74764393-74764437                            | NM_007456:384       | Ap1m1      | INSIDE                 | 1.784                                                        | 2.981                          | 740.71             | 2207.94            | 5.317                          | 583.61             | 3102.99            |

| ProbeName      | Target position of probe on CpG island microarray | TargetID          | GeneSymbol | CpG island Description | Ratio of relative methylation (TiO <sub>2</sub> -NP/Vehicle) | Sham group                     |                    |                    | TiO <sub>2</sub> -H group      |                    |                    |
|----------------|---------------------------------------------------|-------------------|------------|------------------------|--------------------------------------------------------------|--------------------------------|--------------------|--------------------|--------------------------------|--------------------|--------------------|
|                |                                                   |                   |            |                        |                                                              | Relative methylation (Cy5/Cy3) | Cy3 signal (Input) | Cy5 signal (MeDIP) | Relative methylation (Cy5/Cy3) | Cy3 signal (Input) | Cy5 signal (MeDIP) |
| A_68_P30588065 | chr16:20535666-20535710                           | NM_009679:112     | Ap2m1      | INSIDE                 | 1.576                                                        | 4.216                          | 3006.62            | 12676.79           | 6.643                          | 2140.72            | 14221.37           |
| A_68_P25712956 | chr8:23916111-23916155                            | NM_001122820:-6   | Ap3m2      | PROMOTER               | 1.652                                                        | 4.125                          | 3610.71            | 14895.53           | 6.816                          | 2789.42            | 19011.75           |
| A_68_P31678555 | chr18:46901926-46901970                           | NM_009681:378     | Ap3s1      | INSIDE                 | 2.070                                                        | 5.852                          | 3619.77            | 21183.18           | 12.116                         | 2582.15            | 31286.58           |
| A_68_P23763011 | chr5:67009509-67009553                            | NM_009686:380     | Apbb2      | INSIDE                 | 2.598                                                        | 8.757                          | 907.55             | 7947.11            | 22.748                         | 649.96             | 14785.56           |
| A_68_P32362520 | chrX:45387716-45387760                            | NM_013912:291     | Apln       | INSIDE                 | 2.111                                                        | 11.695                         | 2906.03            | 33987.15           | 24.693                         | 1701.13            | 42005.98           |
| A_68_P26399336 | chr9:31018727-31018771                            | NM_001102455:652  | Aplp2      | INSIDE                 | 1.866                                                        | 3.500                          | 1846.08            | 6460.53            | 6.530                          | 1573.87            | 10276.76           |
| A_68_P32538582 | chrX:91612233-91612277                            | NM_026673:-194    | Apoa       | PROMOTER               | 1.639                                                        | 2.182                          | 678.97             | 1481.54            | 3.577                          | 327.86             | 1172.65            |
| A_68_P30927986 | chr16:85173922-85173966                           | NM_001198823:8    | App        | INSIDE                 | 1.810                                                        | 4.246                          | 1445.59            | 6137.72            | 7.684                          | 1257.78            | 9665.34            |
| A_68_P30481041 | chr15:99414682-99414726                           | NM_009699:5218    | Aqp2       | INSIDE                 | 1.716                                                        | 3.349                          | 1478.19            | 4949.91            | 5.747                          | 1177.19            | 6764.97            |
| A_68_P23742487 | chr5:63157563-63157607                            | NM_178407:-168    | Arap2      | PROMOTER               | 1.654                                                        | 4.428                          | 1093.37            | 4841.67            | 7.324                          | 873.88             | 6400.40            |
| A_68_P30338802 | chr15:74503171-74503215                           | NM_018790:-192    | Arc        | PROMOTER               | 1.692                                                        | 3.131                          | 5011.73            | 15690.22           | 5.298                          | 3499.47            | 18539.99           |
| A_68_P26469462 | chr9:44575608-44575652                            | NM_145985:261     | Aren1      | INSIDE                 | 1.732                                                        | 4.073                          | 1190.06            | 4847.60            | 7.057                          | 1021.52            | 7208.99            |
| A_68_P26469460 | chr9:44575399-44575447                            | NM_145985:469     | Aren1      | INSIDE                 | 1.531                                                        | 7.501                          | 660.54             | 4954.98            | 11.486                         | 401.09             | 4606.84            |
| A_68_P27835628 | chr11:59041341-59041385                           | NM_001130408:302  | Arf1       | INSIDE                 | 1.704                                                        | 4.375                          | 592.46             | 2591.78            | 7.456                          | 507.66             | 3785.08            |
| A_68_P27835630 | chr11:59041516-59041560                           | NM_001130408:126  | Arf1       | INSIDE                 | 1.592                                                        | 2.033                          | 1722.66            | 3502.46            | 3.236                          | 1427.13            | 4618.53            |
| A_68_P30476328 | chr15:98593484-98593528                           | NM_007478:43      | Arf3       | INSIDE                 | 1.594                                                        | 2.018                          | 3901.49            | 7874.01            | 3.216                          | 3017.31            | 9704.51            |
| A_68_P30476326 | chr15:98593248-98593292                           | NM_007478:279     | Arf3       | INSIDE                 | 1.808                                                        | 1.391                          | 2235.94            | 3111.08            | 2.516                          | 1636.95            | 4118.23            |
| A_68_P25983698 | chr8:80041949-80041993                            | NM_030113:-164    | Arhgap10   | PROMOTER               | 1.754                                                        | 7.007                          | 3126.51            | 21906.85           | 12.292                         | 2424.09            | 29797.49           |
| A_68_P31315914 | chr7:68353306-68353350                            | NM_172964:120     | Arhgap28   | INSIDE                 | 1.741                                                        | 3.659                          | 2455.65            | 8984.22            | 6.368                          | 2022.42            | 12879.14           |
| A_68_P25032017 | chr7:31319995-31320040                            | NM_178252:11      | Arhgap33   | INSIDE                 | 2.650                                                        | 5.817                          | 30484.87           | 177343.10          | 15.418                         | 21467.82           | 330995.40          |
| A_68_P25032021 | chr7:31320496-31320540                            | NM_178252:-490    | Arhgap33   | PROMOTER               | 2.197                                                        | 5.889                          | 4112.22            | 24218.15           | 12.937                         | 2604.63            | 33696.82           |
| A_68_P30350779 | chr15:76647508-76647552                           | NM_001168288:1070 | Arhgap39   | INSIDE                 | 1.516                                                        | 2.606                          | 1450.37            | 3779.73            | 3.952                          | 1090.58            | 4309.65            |
| A_68_P26295538 | chr9:9239294-9239338                              | NM_027823:-303    | Arhgap42   | PROMOTER               | 1.569                                                        | 3.162                          | 3797.50            | 12008.35           | 4.961                          | 2969.28            | 14729.70           |
| A_68_P28185441 | chr11:120442461-120442505                         | NM_133796:452     | Arhgdia    | INSIDE                 | 1.520                                                        | 1.757                          | 2949.75            | 5183.66            | 2.671                          | 2275.76            | 6078.96            |
| A_68_P31108897 | chr17:26337756-26337800                           | NM_008113:517     | Arhgdig    | INSIDE                 | 1.657                                                        | 6.939                          | 5809.01            | 40307.93           | 11.500                         | 4304.82            | 49505.05           |
| A_68_P23430520 | chr4:153674348-153674392                          | NM_001112744:-366 | Arhgef16   | PROMOTER               | 2.046                                                        | 6.781                          | 4768.04            | 32330.88           | 13.874                         | 3046.91            | 42272.60           |
| A_68_P23430516 | chr4:153673821-153673865                          | NM_001112744:162  | Arhgef16   | INSIDE                 | 2.012                                                        | 3.473                          | 3277.71            | 11382.83           | 6.988                          | 2371.01            | 16569.62           |
| A_68_P23362920 | chr4:140804003-140804047                          | NM_172520:5226    | Arhgef19   | INSIDE                 | 1.870                                                        | 5.882                          | 3780.71            | 22238.90           | 11.000                         | 2681.58            | 29498.68           |
| A_68_P22314836 | chr3:88425692-88425736                            | NM_001198912:399  | Arhgef2    | INSIDE                 | 1.678                                                        | 6.619                          | 2870.12            | 18996.50           | 11.103                         | 2409.48            | 26752.56           |
| A_68_P25657178 | chr8:11728695-11728739                            | NM_001113517:612  | Arhgef7    | INSIDE                 | 1.697                                                        | 4.997                          | 1742.71            | 8709.00            | 8.478                          | 1385.60            | 11747.66           |
| A_68_P23319354 | chr4:133310209-133310253                          | NM_001080819:-704 | Arid1a     | PROMOTER               | 1.598                                                        | 2.197                          | 3613.68            | 7937.87            | 3.510                          | 2699.47            | 9473.94            |
| A_68_P31013736 | chr17:4994894-4994938                             | NM_001085355:-157 | Arid1b     | PROMOTER               | 2.112                                                        | 7.097                          | 7741.52            | 54941.16           | 14.990                         | 5329.90            | 79894.54           |
| A_68_P28836964 | chr13:14157071-14157115                           | NM_194262:1034    | Arid4b     | INSIDE                 | 1.564                                                        | 2.482                          | 844.98             | 2096.93            | 3.880                          | 657.33             | 2550.72            |
| A_68_P29342439 | chr13:114584551-114584595                         | NM_172595:-143    | Arl15      | PROMOTER               | 2.306                                                        | 6.894                          | 13305.65           | 91725.86           | 15.896                         | 9055.61            | 143951.40          |
| A_68_P32144718 | chr19:46647649-46647693                           | NM_019718:-95     | Arl3       | DIVERGENT_PROMOTER     | 1.936                                                        | 5.303                          | 2710.10            | 14370.72           | 10.264                         | 2159.84            | 22168.29           |
| A_68_P20637774 | chr1:137044071-137044115                          | NM_026823:682     | Arl8a      | INSIDE                 | 2.086                                                        | 7.376                          | 14805.20           | 109197.40          | 15.389                         | 10138.97           | 156028.00          |
| A_68_P24759117 | chr6:113328299-113328343                          | NM_001170485:214  | Arpc4      | INSIDE                 | 1.632                                                        | 11.956                         | 3011.48            | 36006.38           | 19.517                         | 2285.29            | 44602.84           |
| A_68_P27900652 | chr11:70246079-70246123                           | NM_145429:-54     | Arrb2      | PROMOTER               | 1.979                                                        | 2.610                          | 1169.34            | 3052.36            | 5.167                          | 916.74             | 4736.55            |
| A_68_P28118792 | chr11:109334732-109334776                         | NM_028710:67      | Arsg       | INSIDE                 | 1.751                                                        | 1.983                          | 2131.27            | 4227.17            | 3.474                          | 1811.40            | 6292.14            |
| A_68_P32533200 | chrX:90534061-90534105                            | NM_007492:2098    | Arx        | INSIDE                 | 3.504                                                        | 13.814                         | 6300.76            | 87041.16           | 48.399                         | 3229.51            | 156305.70          |
| A_68_P32533286 | chrX:90544628-90544672                            | NM_007492:12666   | Arx        | DOWNSTREAM             | 2.358                                                        | 4.450                          | 2021.28            | 8993.94            | 10.492                         | 1357.54            | 14243.46           |
| A_68_P32533270 | chrX:90542781-90542825                            | NM_007492:10818   | Arx        | INSIDE                 | 2.126                                                        | 3.577                          | 832.85             | 2978.70            | 7.604                          | 439.74             | 3344.00            |
| A_68_P32533249 | chrX:90540139-90540183                            | NM_007492:8176    | Arx        | INSIDE                 | 1.592                                                        | 2.504                          | 1322.93            | 3312.11            | 3.985                          | 969.13             | 3861.84            |
| A_68_P33008885 | chr12:21117800-21117844                           | NM_001004364:206  | Asap2      | INSIDE                 | 1.629                                                        | 3.874                          | 2797.09            | 10835.86           | 6.309                          | 2307.57            | 14558.86           |
| A_68_P27681337 | chr11:30854282-30854326                           | NM_023906:-93     | Asb3       | DIVERGENT_PROMOTER     | 2.186                                                        | 6.686                          | 9808.72            | 65585.14           | 14.615                         | 7228.55            | 105644.30          |
| A_68_P27171931 | chr10:59465553-59465597                           | NM_026937:22      | Asce1      | INSIDE                 | 1.823                                                        | 3.303                          | 1913.76            | 6322.08            | 6.023                          | 1652.32            | 9952.06            |
| A_68_P27558730 | chr11:4537928-4537972                             | NM_029291:155     | Ascc2      | INSIDE                 | 2.265                                                        | 8.303                          | 1676.18            | 13917.18           | 18.803                         | 1201.82            | 22597.63           |

| ProbeName      | Target position of probe on CpG island microarray | TargetID           | GeneSymbol | CpG island Description | Ratio of relative methylation (TiO <sub>2</sub> -NP/Vehicle) | Sham group                     |                    |                    | TiO <sub>2</sub> -H group      |                    |                    |
|----------------|---------------------------------------------------|--------------------|------------|------------------------|--------------------------------------------------------------|--------------------------------|--------------------|--------------------|--------------------------------|--------------------|--------------------|
|                |                                                   |                    |            |                        |                                                              | Relative methylation (Cy5/Cy3) | Cy3 signal (Input) | Cy5 signal (MeDIP) | Relative methylation (Cy5/Cy3) | Cy3 signal (Input) | Cy5 signal (MeDIP) |
| A_68_P27558727 | chr11:4537643-4537687                             | NM_029291:-131     | Ascc2      | DIVERGENT_PROMOTER     | 1.541                                                        | 4.826                          | 3891.78            | 18781.00           | 7.434                          | 2991.62            | 22240.76           |
| A_68_P27129526 | chr10:50312500-50312544                           | NM_001146089:48    | Ascc3      | INSIDE                 | 2.737                                                        | 7.551                          | 1717.70            | 12970.13           | 20.665                         | 1310.39            | 27079.84           |
| A_68_P25597935 | chr7:150155005-150155050                          | NM_008554:142      | Ascl2      | INSIDE                 | 1.527                                                        | 1.424                          | 1230.80            | 1753.04            | 2.175                          | 972.17             | 2114.90            |
| A_68_P27311153 | chr10:85391455-85391499                           | NM_001163614:241   | Ascl4      | INSIDE                 | 1.767                                                        | 4.192                          | 1634.87            | 6853.41            | 7.406                          | 1314.91            | 9737.78            |
| A_68_P27311154 | chr10:85391524-85391568                           | NM_001163614:311   | Ascl4      | INSIDE                 | 1.602                                                        | 2.795                          | 359.07             | 1003.47            | 4.477                          | 296.83             | 1328.85            |
| A_68_P20231549 | chr1:53409460-53409504                            | NM_133728:61       | Asnsd1     | INSIDE                 | 1.589                                                        | 4.459                          | 1548.31            | 6903.98            | 7.087                          | 1276.77            | 9049.05            |
| A_68_P20231550 | chr1:53409540-53409584                            | NM_133728:-19      | Asnsd1     | PROMOTER               | 1.505                                                        | 3.087                          | 1517.71            | 4684.89            | 4.647                          | 1377.76            | 6402.13            |
| A_68_P25503171 | chr7:134093152-134093196                          | NM_001039645:-79   | Asphd1     | DIVERGENT_PROMOTER     | 1.582                                                        | 1.818                          | 2003.95            | 3643.79            | 2.877                          | 1578.37            | 4540.81            |
| A_68_P23991928 | chr5:112823693-112823737                          | NM_028386:-2481    | Asphd2     | PROMOTER               | 1.740                                                        | 4.992                          | 2724.62            | 13601.48           | 8.687                          | 2226.16            | 19338.16           |
| A_68_P21754297 | chr2:153171289-153171333                          | NM_001039939:-564  | Asxl1      | PROMOTER               | 1.581                                                        | 2.682                          | 4922.89            | 13203.66           | 4.241                          | 3681.23            | 15611.84           |
| A_68_P30246249 | chr15:57966345-57966389                           | NM_027435:271      | Atad2      | INSIDE                 | 1.890                                                        | 8.349                          | 2043.61            | 17062.91           | 15.779                         | 1656.81            | 26143.28           |
| A_68_P28203004 | chr12:4924079-4924123                             | NM_001099628:-58   | Atad2b     | DIVERGENT_PROMOTER     | 1.719                                                        | 5.477                          | 1128.71            | 6182.38            | 9.415                          | 915.99             | 8624.10            |
| A_68_P25522110 | chr7:137662756-137662800                          | NM_001136054:266   | Ate1       | INSIDE                 | 2.507                                                        | 2.149                          | 975.56             | 2096.60            | 5.388                          | 765.52             | 4124.45            |
| A_68_P30484704 | chr15:100058837-100058881                         | NM_007497:569      | Atf1       | INSIDE                 | 1.779                                                        | 3.069                          | 632.44             | 1941.20            | 5.461                          | 547.45             | 2989.56            |
| A_68_P21334154 | chr2:73729891-73729935                            | NM_001025093:773   | Atf2       | INSIDE                 | 2.330                                                        | 9.939                          | 23555.36           | 234127.40          | 23.161                         | 14168.05           | 328151.80          |
| A_68_P20936661 | chr1:193006674-193006718                          | NM_007498:516      | Atf3       | INSIDE                 | 1.738                                                        | 7.410                          | 4368.87            | 32372.21           | 12.876                         | 3330.41            | 42883.92           |
| A_68_P30371091 | chr15:80086279-80086325                           | NM_009716:689      | Atf4       | INSIDE                 | 1.948                                                        | 3.218                          | 1720.78            | 5537.99            | 6.270                          | 1305.60            | 8185.62            |
| A_68_P30371089 | chr15:80086079-80086123                           | NM_009716:487      | Atf4       | INSIDE                 | 1.583                                                        | 3.049                          | 1179.31            | 3596.02            | 4.827                          | 964.24             | 4654.11            |
| A_68_P31155038 | chr17:34784397-34784441                           | NM_017406:294      | Atf6b      | INSIDE                 | 2.986                                                        | 23.608                         | 887.30             | 20947.48           | 70.495                         | 609.26             | 42949.85           |
| A_68_P24872958 | chr6:136467356-136467400                          | NM_019426:7        | Atf7ip     | INSIDE                 | 1.785                                                        | 3.282                          | 2891.36            | 9490.11            | 5.858                          | 2247.19            | 13163.42           |
| A_68_P24766862 | chr6:114688350-114688394                          | NM_028835:95230    | Atg7       | INSIDE                 | 1.782                                                        | 3.117                          | 2619.62            | 8164.55            | 5.554                          | 2153.76            | 11961.65           |
| A_68_P24816773 | chr6:124696183-124696227                          | NM_007881:10301    | Atn1       | INSIDE                 | 2.000                                                        | 4.992                          | 1835.22            | 9160.55            | 9.981                          | 1390.13            | 13875.38           |
| A_68_P22376195 | chr3:101408231-101408275                          | NM_144900:328      | Atp1a1     | INSIDE                 | 1.933                                                        | 5.227                          | 2297.12            | 12008.18           | 10.104                         | 1986.01            | 20065.78           |
| A_68_P27914258 | chr11:72775141-72775185                           | NM_001163336:492   | Atp2a3     | INSIDE                 | 1.893                                                        | 2.324                          | 1220.11            | 2835.14            | 4.398                          | 1120.16            | 4926.22            |
| A_68_P32463053 | chrX:70748921-70748965                            | NM_177236:518      | Atp2b3     | INSIDE                 | 2.146                                                        | 1.750                          | 5188.54            | 9081.27            | 3.756                          | 2355.67            | 8846.92            |
| A_68_P32463052 | chrX:70748623-70748667                            | NM_177236:220      | Atp2b3     | INSIDE                 | 1.647                                                        | 2.172                          | 401.11             | 871.38             | 3.578                          | 214.89             | 768.83             |
| A_68_P21875562 | chr2:174289603-174289647                          | NM_025983:-22      | Atp5e      | PROMOTER               | 1.580                                                        | 3.191                          | 1417.02            | 4521.49            | 5.041                          | 1276.23            | 6434.07            |
| A_68_P26134609 | chr8:108089863-108089907                          | NM_013477:56       | Atp6v0d1   | INSIDE                 | 1.678                                                        | 1.831                          | 3683.70            | 6745.62            | 3.072                          | 2918.43            | 8965.38            |
| A_68_P30150544 | chr15:38591583-38591627                           | NM_025494:-54      | Atp6v1c1   | PROMOTER               | 1.727                                                        | 3.206                          | 1534.77            | 4919.78            | 5.535                          | 1234.99            | 6835.11            |
| A_68_P30150543 | chr15:38591462-38591506                           | NM_025494:-174     | Atp6v1c1   | PROMOTER               | 1.546                                                        | 2.549                          | 521.34             | 1328.89            | 3.940                          | 401.56             | 1582.16            |
| A_68_P22971150 | chr4:63206034-63206078                            | NM_024173:258      | Atp6v1g1   | INSIDE                 | 1.732                                                        | 4.331                          | 2368.67            | 10258.41           | 7.501                          | 2015.75            | 15119.91           |
| A_68_P23770428 | chr5:68238336-68238380                            | NM_001038999:312   | Atp8a1     | INSIDE                 | 1.769                                                        | 2.920                          | 5059.10            | 14771.55           | 5.165                          | 4019.53            | 20760.05           |
| A_68_P31867752 | chr18:81130655-81130699                           | NM_001201569:121   | Atp9b      | INSIDE                 | 1.555                                                        | 3.281                          | 3663.16            | 12018.74           | 5.101                          | 3085.38            | 15738.90           |
| A_68_P21632194 | chr2:130732229-130732273                          | NM_009730:19       | Atrn       | INSIDE                 | 1.532                                                        | 5.371                          | 1345.00            | 7224.55            | 8.228                          | 1081.03            | 8894.90            |
| A_68_P29005205 | chr13:46060754-46060798                           | NM_009124:-431     | Atxn1      | PROMOTER               | 1.754                                                        | 3.197                          | 1185.29            | 3789.79            | 5.607                          | 956.20             | 5361.12            |
| A_68_P29005211 | chr13:46061364-46061408                           | NM_009124:-1041    | Atxn1      | PROMOTER               | 1.601                                                        | 3.328                          | 3978.55            | 13239.55           | 5.327                          | 2945.77            | 15691.53           |
| A_68_P26158736 | chr8:112261757-112261801                          | NM_001080930:-139  | Atxn1l     | PROMOTER               | 1.951                                                        | 1.963                          | 1818.15            | 3569.42            | 3.830                          | 1494.02            | 5721.52            |
| A_68_P28078744 | chr11:102157408-102157452                         | NM_001098836:513   | Atxn7l3    | INSIDE                 | 1.982                                                        | 2.125                          | 1191.74            | 2532.41            | 4.212                          | 930.26             | 3917.90            |
| A_68_P27456596 | chr10:112366019-112366063                         | NM_001033474:42    | Atxn7l3b   | INSIDE                 | 1.872                                                        | 2.055                          | 1150.38            | 2364.14            | 3.846                          | 889.33             | 3420.50            |
| A_68_P23244381 | chr4:118905195-118905239                          | NM_001012400:113   | AU022252   | INSIDE                 | 2.333                                                        | 2.690                          | 5994.47            | 16124.96           | 6.275                          | 4417.41            | 27719.49           |
| A_68_P29040998 | chr13:53024981-53025025                           | NM_016709:44       | Auh        | INSIDE                 | 1.692                                                        | 3.051                          | 17814.71           | 54352.38           | 5.163                          | 14317.06           | 73919.36           |
| A_68_P24591144 | chr6:83005100-83005144                            | NM_007517:476      | Aup1       | INSIDE                 | 1.935                                                        | 1.746                          | 1460.28            | 2549.64            | 3.378                          | 1153.78            | 3897.89            |
| A_68_P24098738 | chr5:132013832-132013876                          | NM_177047:1004359  | Auts2      | INSIDE                 | 1.897                                                        | 3.105                          | 2416.69            | 7504.06            | 5.891                          | 1923.10            | 11328.58           |
| A_68_P24098740 | chr5:132014030-132014074                          | NM_177047:1004161  | Auts2      | INSIDE                 | 1.633                                                        | 3.487                          | 5752.28            | 20058.84           | 5.694                          | 4561.64            | 25972.06           |
| A_68_P28752186 | chr12:113977208-113977252                         | NM_001024602:16846 | AW555464   | INSIDE                 | 1.922                                                        | 4.566                          | 3478.97            | 15886.58           | 8.777                          | 2592.08            | 22749.48           |
| A_68_P28752030 | chr12:113959942-113959986                         | NM_001024602:-420  | AW555464   | PROMOTER               | 1.833                                                        | 5.367                          | 1685.78            | 9047.25            | 9.838                          | 1290.79            | 12699.32           |
| A_68_P28752038 | chr12:113960892-113960936                         | NM_001024602:530   | AW555464   | INSIDE                 | 1.558                                                        | 2.278                          | 1280.40            | 2916.80            | 3.548                          | 1133.46            | 4021.72            |



| ProbeName      | Target position of probe on CpG island microarray | TargetID           | GeneSymbol    | CpG island Description | Ratio of relative methylation (TiO <sub>2</sub> -NP/Vehicle) | Sham group                     |                    |                    | TiO <sub>2</sub> -H group      |                    |                    |
|----------------|---------------------------------------------------|--------------------|---------------|------------------------|--------------------------------------------------------------|--------------------------------|--------------------|--------------------|--------------------------------|--------------------|--------------------|
|                |                                                   |                    |               |                        |                                                              | Relative methylation (Cy5/Cy3) | Cy3 signal (Input) | Cy5 signal (MeDIP) | Relative methylation (Cy5/Cy3) | Cy3 signal (Input) | Cy5 signal (MeDIP) |
| A_68_P28115686 | chr11:108782547-108782591                         | NM_015732:906      | Axin2         | INSIDE                 | 1.967                                                        | 3.863                          | 1652.35            | 6382.81            | 7.597                          | 1331.82            | 10117.39           |
| A_68_P26864195 | chr9:117949694-117949738                          | NM_001048146:100   | Azi2          | INSIDE                 | 2.577                                                        | 9.490                          | 2913.48            | 27648.78           | 24.453                         | 2021.37            | 49428.26           |
| A_68_P26864197 | chr9:117949927-117949971                          | NM_001048146:332   | Azi2          | INSIDE                 | 1.578                                                        | 4.258                          | 401.44             | 1709.32            | 6.717                          | 385.58             | 2590.10            |
| A_68_P30149946 | chr15:38448361-38448405                           | NM_001102458:639   | Azin1         | INSIDE                 | 1.768                                                        | 2.411                          | 2801.07            | 6754.27            | 4.263                          | 2330.83            | 9935.58            |
| A_68_P32573854 | chrX:100810244-100810288                          | NR_028381:8827     | B230206F22Rik | INSIDE                 | 1.594                                                        | 4.072                          | 8298.88            | 33789.92           | 6.490                          | 3713.15            | 24097.37           |
| A_68_P32573868 | chrX:100812194-100812238                          | NR_028381:8877     | B230206F22Rik | INSIDE                 | 1.522                                                        | 1.930                          | 590.26             | 1139.31            | 2.937                          | 464.53             | 1364.45            |
| A_68_P23364697 | chr4:141101930-141101974                          | NR_030695:-124     | B330016D10Rik | DIVERGENT_PROMOTER     | 1.646                                                        | 2.241                          | 420.61             | 942.55             | 3.689                          | 394.23             | 1454.27            |
| A_68_P22222029 | chr3:69402614-69402658                            | NM_020026:147      | B3galnt1      | INSIDE                 | 1.740                                                        | 2.676                          | 1545.57            | 4135.28            | 4.657                          | 1385.46            | 6451.65            |
| A_68_P27643047 | chr11:22758992-22759036                           | NM_016888:721      | B3gnt2        | INSIDE                 | 1.503                                                        | 2.345                          | 1392.02            | 3264.16            | 3.524                          | 1171.12            | 4127.43            |
| A_68_P26727067 | chr9:92437602-92437647                            | NR_029474:83       | B430319G15Rik | INSIDE                 | 1.716                                                        | 3.978                          | 2810.97            | 11182.00           | 6.828                          | 2049.32            | 13992.34           |
| A_68_P28041452 | chr11:95775809-95775854                           | NM_008081:354      | B4galnt2      | INSIDE                 | 1.558                                                        | 4.699                          | 3119.17            | 14657.35           | 7.323                          | 2688.16            | 19685.59           |
| A_68_P24797816 | chr6:120244799-120244843                          | NM_198884:-243     | B4galnt3      | PROMOTER               | 1.663                                                        | 4.357                          | 3431.01            | 14947.66           | 7.245                          | 2671.21            | 19353.42           |
| A_68_P22859197 | chr4:40800680-40800724                            | NM_022305:329      | B4galnt1      | INSIDE                 | 1.751                                                        | 3.145                          | 1556.87            | 4896.93            | 5.509                          | 1299.73            | 7159.97            |
| A_68_P20827009 | chr1:173200884-173200928                          | NM_020579:448      | B4galnt3      | INSIDE                 | 1.714                                                        | 5.863                          | 2039.79            | 11958.50           | 10.047                         | 1518.05            | 15252.02           |
| A_68_P23440042 | chr4:155069270-155069314                          | NM_178699:842      | B930041F14Rik | INSIDE                 | 2.057                                                        | 2.160                          | 3207.52            | 6928.72            | 4.444                          | 2257.47            | 10031.80           |
| A_68_P26476281 | chr9:45647027-45647071                            | NM_001145947:437   | Bace1         | INSIDE                 | 1.538                                                        | 3.408                          | 1593.42            | 5430.55            | 5.240                          | 1236.49            | 6479.45            |
| A_68_P30337605 | chr15:74348245-74348289                           | NM_174991:1641     | Bai1          | INSIDE                 | 2.237                                                        | 5.632                          | 3019.87            | 17008.45           | 12.598                         | 1874.84            | 23618.98           |
| A_68_P30337599 | chr15:74347574-74347618                           | NM_174991:971      | Bai1          | INSIDE                 | 1.876                                                        | 5.979                          | 1825.93            | 10917.73           | 11.217                         | 1386.24            | 15550.12           |
| A_68_P23299678 | chr4:129683985-129684029                          | NM_001199696:21685 | Bai2          | INSIDE                 | 1.602                                                        | 2.638                          | 709.65             | 1872.38            | 4.226                          | 588.49             | 2486.74            |
| A_68_P20101394 | chr1:25886869-25886913                            | NM_175642:-338     | Bai3          | PROMOTER               | 1.731                                                        | 6.315                          | 3410.04            | 21533.82           | 10.933                         | 2400.03            | 26238.94           |
| A_68_P31458875 | chr18:3507840-3507884                             | NM_026505:-92      | Bambi         | PROMOTER               | 2.575                                                        | 17.069                         | 2820.94            | 48149.43           | 43.952                         | 1883.09            | 82765.38           |
| A_68_P21094081 | chr2:28764046-28764090                            | NM_019446:7873     | Barhl1        | INSIDE                 | 1.501                                                        | 2.176                          | 1638.99            | 3567.19            | 3.267                          | 1373.26            | 4487.10            |
| A_68_P21094161 | chr2:28773677-28773726                            | NM_001164186:-1741 | Barhl1        | PROMOTER               | 1.575                                                        | 1.669                          | 957.36             | 1597.63            | 2.628                          | 775.30             | 2037.63            |
| A_68_P21094080 | chr2:28763906-28763951                            | NM_019446:8013     | Barhl1        | INSIDE                 | 1.759                                                        | 1.881                          | 359.60             | 676.37             | 3.309                          | 188.20             | 622.75             |
| A_68_P23961359 | chr5:106887678-106887722                          | NM_001005477:-515  | Barhl2        | PROMOTER               | 1.660                                                        | 2.219                          | 607.95             | 1349.18            | 3.685                          | 465.73             | 1716.21            |
| A_68_P23961301 | chr5:106881112-106881156                          | NM_001005477:6051  | Barhl2        | DOWNSTREAM             | 1.530                                                        | 4.458                          | 1187.26            | 5292.41            | 6.821                          | 1025.21            | 6992.74            |
| A_68_P24115158 | chr5:135663906-135663950                          | NM_011714:736      | Baz1b         | INSIDE                 | 1.625                                                        | 4.863                          | 843.16             | 4100.18            | 7.903                          | 750.44             | 5930.37            |
| A_68_P27539535 | chr10:127533910-127533954                         | NM_054078:4094     | Baz2a         | INSIDE                 | 1.542                                                        | 1.931                          | 1625.26            | 3138.52            | 2.978                          | 1391.91            | 4145.42            |
| A_68_P24330588 | chr6:30124352-30124396                            | NR_038124:-2248    | BB283400      | DIVERGENT_PROMOTER     | 1.628                                                        | 3.446                          | 1069.53            | 3685.40            | 5.610                          | 927.75             | 5204.62            |
| A_68_P24980793 | chr7:16899189-16899233                            | NM_133234:4279     | Bbc3          | INSIDE                 | 1.567                                                        | 1.681                          | 1963.70            | 3300.92            | 2.634                          | 1626.81            | 4285.17            |
| A_68_P24980722 | chr7:16885176-16885220                            | NM_133234:-9733    | Bbc3          | PROMOTER               | 1.670                                                        | 1.553                          | 819.54             | 1272.83            | 2.594                          | 910.99             | 2363.33            |
| A_68_P27448186 | chr10:110735503-110735547                         | NM_027914:-210     | Bbs10         | PROMOTER               | 2.136                                                        | 4.699                          | 6265.44            | 29444.31           | 10.038                         | 4580.95            | 45985.56           |
| A_68_P31126996 | chr17:29406043-29406087                           | NM_030561:332      | BC004004      | INSIDE                 | 1.515                                                        | 3.081                          | 2100.11            | 6469.43            | 4.666                          | 1938.91            | 9046.55            |
| A_68_P28889015 | chr13:24892904-24892948                           | NM_024473:-599     | BC005537      | PROMOTER               | 1.612                                                        | 2.710                          | 573.41             | 1553.95            | 4.369                          | 537.08             | 2346.26            |
| A_68_P27855082 | chr11:62461774-62461819                           | NM_198861:229      | BC046404      | INSIDE                 | 1.680                                                        | 3.524                          | 546.37             | 1925.28            | 5.918                          | 463.03             | 2740.32            |
| A_68_P24004683 | chr5:115017800-115017844                          | NM_001004180:-437  | BC057022      | PROMOTER               | 2.324                                                        | 15.416                         | 3357.74            | 51764.02           | 35.833                         | 2417.21            | 86615.99           |
| A_68_P24004680 | chr5:115017431-115017475                          | NM_001004180:-807  | BC057022      | PROMOTER               | 1.842                                                        | 14.251                         | 1361.17            | 19397.40           | 26.247                         | 916.41             | 24053.55           |
| A_68_P24004989 | chr5:115060757-115060801                          | NM_001004180:42519 | BC057022      | INSIDE                 | 1.798                                                        | 4.701                          | 4257.35            | 20015.41           | 8.454                          | 3149.22            | 26623.86           |
| A_68_P24004993 | chr5:115061259-115061303                          | NM_001004180:43021 | BC057022      | INSIDE                 | 1.672                                                        | 4.702                          | 9280.21            | 43633.32           | 7.863                          | 6289.56            | 49452.98           |
| A_68_P24004682 | chr5:115017652-115017696                          | NM_001004180:-585  | BC057022      | PROMOTER               | 1.510                                                        | 2.639                          | 1484.21            | 3916.52            | 3.985                          | 1255.60            | 5003.35            |
| A_68_P25616602 | chr8:4217183-4217227                              | NM_207203:108      | BC068157      | INSIDE                 | 2.268                                                        | 2.780                          | 1157.85            | 3218.82            | 6.304                          | 970.70             | 6119.43            |
| A_68_P22311242 | chr3:87803722-87803766                            | NM_007529:534      | Bean          | INSIDE                 | 1.584                                                        | 1.717                          | 634.64             | 1089.84            | 2.719                          | 548.77             | 1492.29            |
| A_68_P28332409 | chr12:32319733-32319777                           | NM_001164090:-231  | Bcap29        | PROMOTER               | 2.486                                                        | 9.592                          | 2652.51            | 25441.57           | 23.849                         | 1708.35            | 40742.33           |
| A_68_P32464342 | chrX:70961468-70961512                            | NM_012060:24       | Bcap31        | INSIDE                 | 2.898                                                        | 3.555                          | 4575.87            | 16269.43           | 10.304                         | 2149.12            | 22144.39           |
| A_68_P24920738 | chr6:144997199-144997243                          | NM_001024468:112   | Beat1         | INSIDE                 | 2.213                                                        | 2.887                          | 1538.27            | 4441.50            | 6.390                          | 1136.41            | 7261.59            |
| A_68_P27649080 | chr11:23979542-23979586                           | NM_001159290:-1130 | Bcl11a        | PROMOTER               | 1.580                                                        | 1.559                          | 1357.49            | 2115.82            | 2.463                          | 1197.90            | 2950.60            |
| A_68_P28724517 | chr12:109154270-109154314                         | NM_001079883:87332 | Bcl11b        | INSIDE                 | 1.883                                                        | 5.082                          | 2190.88            | 11133.18           | 9.566                          | 1718.68            | 16441.20           |

| ProbeName      | Target position of probe on CpG island microarray | TargetID           | GeneSymbol | CpG island Description | Ratio of relative methylation (TiO <sub>2</sub> -NP/Vehicle) | Sham group                     |                    |                    | TiO <sub>2</sub> -H group      |                    |                    |
|----------------|---------------------------------------------------|--------------------|------------|------------------------|--------------------------------------------------------------|--------------------------------|--------------------|--------------------|--------------------------------|--------------------|--------------------|
|                |                                                   |                    |            |                        |                                                              | Relative methylation (Cy5/Cy3) | Cy3 signal (Input) | Cy5 signal (MeDIP) | Relative methylation (Cy5/Cy3) | Cy3 signal (Input) | Cy5 signal (MeDIP) |
| A_68_P28725240 | chr12:109244557-109244601                         | NM_001079883:-2954 | Bcl11b     | PROMOTER               | 1.847                                                        | 10.113                         | 8411.21            | 85064.03           | 18.677                         | 6212.44            | 116032.30          |
| A_68_P21751445 | chr2:152656855-152656899                          | NM_009743:542      | Bcl211     | INSIDE                 | 1.593                                                        | 2.403                          | 439.51             | 1056.14            | 3.828                          | 385.97             | 1477.30            |
| A_68_P24995433 | chr7:20408093-20408137                            | NM_033601:-10      | Bcl3       | PROMOTER               | 1.900                                                        | 4.210                          | 710.19             | 2990.18            | 8.001                          | 585.96             | 4688.00            |
| A_68_P30605892 | chr16:23988103-23988147                           | NM_009744:574      | Bcl6       | INSIDE                 | 1.832                                                        | 5.444                          | 3908.90            | 21278.28           | 9.974                          | 3111.28            | 31031.68           |
| A_68_P30605897 | chr16:23988863-23988907                           | NM_009744:-186     | Bcl6       | PROMOTER               | 1.800                                                        | 15.406                         | 1820.78            | 28050.26           | 27.729                         | 1472.85            | 40839.93           |
| A_68_P32260801 | chrX:11735963-11736007                            | NM_001168321:1497  | Bcor       | INSIDE                 | 2.406                                                        | 5.141                          | 2235.03            | 11489.89           | 12.371                         | 1508.11            | 18656.45           |
| A_68_P32260816 | chrX:11737647-11737691                            | NM_001168321:-187  | Bcor       | PROMOTER               | 2.303                                                        | 3.008                          | 999.15             | 3005.25            | 6.928                          | 525.11             | 3638.03            |
| A_68_P32260286 | chrX:11658874-11658919                            | NM_029510:-1217    | Bcor       | PROMOTER               | 1.946                                                        | 2.868                          | 401.28             | 1150.87            | 5.582                          | 234.46             | 1308.67            |
| A_68_P32260334 | chrX:11664151-11664195                            | NM_029510:-6493    | Bcor       | PROMOTER               | 1.808                                                        | 2.229                          | 1356.47            | 3024.10            | 4.031                          | 815.61             | 3287.47            |
| A_68_P32260277 | chrX:11657663-11657707                            | NM_029510:-5       | Bcor       | PROMOTER               | 1.683                                                        | 3.273                          | 1448.95            | 4742.62            | 5.508                          | 876.58             | 4828.15            |
| A_68_P32260645 | chrX:11714194-11714238                            | NM_001168321:23265 | Bcor       | INSIDE                 | 2.055                                                        | 1.644                          | 1945.12            | 3196.98            | 3.377                          | 960.88             | 3245.06            |
| A_68_P32260371 | chrX:11668288-11668332                            | NM_001168321:69171 | Bcor       | INSIDE                 | 2.313                                                        | 1.587                          | 1844.59            | 2926.56            | 3.669                          | 931.85             | 3419.40            |
| A_68_P32260247 | chrX:11654044-11654088                            | NM_029510:3613     | Bcor       | INSIDE                 | 2.232                                                        | 1.501                          | 1387.28            | 2082.41            | 2.351                          | 649.41             | 2176.05            |
| A_68_P32260649 | chrX:11714704-11714748                            | NM_001168321:22755 | Bcor       | INSIDE                 | 1.548                                                        | 1.375                          | 1999.44            | 2748.78            | 2.128                          | 960.24             | 2043.29            |
| A_68_P32364063 | chrX:45698568-45698612                            | NM_178782:4056     | Bcor11     | INSIDE                 | 1.698                                                        | 3.139                          | 2990.20            | 9385.67            | 5.330                          | 1496.39            | 7975.42            |
| A_68_P32364027 | chrX:45694166-45694210                            | NM_178782:-346     | Bcor11     | PROMOTER               | 1.660                                                        | 4.598                          | 1081.89            | 4974.40            | 7.632                          | 723.01             | 5517.86            |
| A_68_P32364032 | chrX:45694726-45694770                            | NM_178782:214      | Bcor11     | INSIDE                 | 1.612                                                        | 2.508                          | 1625.91            | 4078.50            | 4.044                          | 1095.53            | 4430.73            |
| A_68_P21516743 | chr2:109533914-109533958                          | NM_001048142:217   | Bdnf       | INSIDE                 | 1.697                                                        | 3.450                          | 2201.21            | 7593.39            | 5.853                          | 1533.04            | 8973.33            |
| A_68_P28731662 | chr12:110290760-110290805                         | NM_001163175:15645 | Begain     | INSIDE                 | 1.694                                                        | 2.853                          | 1011.07            | 2884.77            | 4.833                          | 847.23             | 4094.86            |
| A_68_P28731667 | chr12:110291510-110291554                         | NM_001163175:14895 | Begain     | INSIDE                 | 1.596                                                        | 2.689                          | 2110.52            | 5675.94            | 4.291                          | 1760.86            | 7556.49            |
| A_68_P20135584 | chr1:33964894-33964938                            | NM_177235:-450     | Bend6      | PROMOTER               | 2.037                                                        | 3.894                          | 1308.53            | 5095.77            | 7.934                          | 871.14             | 6911.80            |
| A_68_P21969040 | chr3:17955766-17955810                            | NM_021560:1464     | Bhlhe22    | INSIDE                 | 2.727                                                        | 11.831                         | 7289.10            | 86236.40           | 32.261                         | 4657.85            | 150267.20          |
| A_68_P29024653 | chr13:49436665-49436709                           | NM_001039179:-231  | Bic2       | PROMOTER               | 2.005                                                        | 1.473                          | 918.00             | 1352.30            | 2.953                          | 718.95             | 2123.30            |
| A_68_P31602497 | chr18:32537058-32537102                           | NM_001083334:210   | Bin1       | INSIDE                 | 1.652                                                        | 1.753                          | 1699.03            | 2977.56            | 2.895                          | 1814.24            | 5252.63            |
| A_68_P28167547 | chr11:117710471-117710515                         | NM_001012273:-58   | Birc5      | PROMOTER               | 1.889                                                        | 4.570                          | 1254.99            | 5735.76            | 8.632                          | 1037.63            | 8956.98            |
| A_68_P25017319 | chr7:28232977-28233021                            | NM_144923:2        | Blvb       | INSIDE                 | 1.864                                                        | 5.626                          | 831.95             | 4680.16            | 10.488                         | 640.99             | 6722.65            |
| A_68_P21646236 | chr2:133380456-133380500                          | NM_007553:1544     | Bmp2       | INSIDE                 | 1.503                                                        | 3.428                          | 1928.92            | 6612.98            | 5.151                          | 1538.58            | 7925.62            |
| A_68_P29530305 | chr14:35315556-35315600                           | NM_009758:154      | Bmpr1a     | INSIDE                 | 1.890                                                        | 3.798                          | 2069.87            | 7862.13            | 7.178                          | 1766.58            | 12680.11           |
| A_68_P24786758 | chr6:118369210-118369254                          | NM_194339:203      | Bms1       | INSIDE                 | 1.941                                                        | 1.975                          | 2909.05            | 5744.70            | 3.833                          | 2374.51            | 9101.42            |
| A_68_P31112418 | chr17:26918319-26918363                           | NM_172149:317      | Bnip1      | INSIDE                 | 2.338                                                        | 3.275                          | 5084.44            | 16652.05           | 7.656                          | 3514.57            | 26906.28           |
| A_68_P29682512 | chr14:67627253-67627297                           | NM_009761:440      | Bnip31     | INSIDE                 | 1.739                                                        | 3.096                          | 1938.77            | 6002.12            | 5.383                          | 2240.87            | 12063.71           |
| A_68_P31152238 | chr17:34259488-34259532                           | NM_010238:-818     | Brd2       | PROMOTER               | 2.262                                                        | 8.753                          | 1863.76            | 16313.88           | 19.798                         | 1695.39            | 33564.70           |
| A_68_P31152236 | chr17:34259233-34259277                           | NM_010238:-562     | Brd2       | PROMOTER               | 2.106                                                        | 10.329                         | 4117.14            | 42527.06           | 21.755                         | 2698.80            | 58712.71           |
| A_68_P31152221 | chr17:34257414-34257458                           | NR_037970:-591     | Brd2       | PROMOTER               | 1.886                                                        | 4.785                          | 791.53             | 3787.67            | 9.025                          | 636.70             | 5746.45            |
| A_68_P31152235 | chr17:34259132-34259176                           | NM_010238:-462     | Brd2       | PROMOTER               | 1.584                                                        | 2.928                          | 654.82             | 1917.42            | 4.640                          | 523.46             | 2428.63            |
| A_68_P21084949 | chr2:27330700-27330744                            | NM_023336:196      | Brd3       | INSIDE                 | 3.270                                                        | 18.917                         | 430.60             | 8145.76            | 61.868                         | 299.91             | 18554.51           |
| A_68_P24160214 | chr5:145016060-145016104                          | NM_018772:-11      | Bri3       | PROMOTER               | 2.046                                                        | 3.409                          | 1012.84            | 3452.90            | 6.976                          | 891.10             | 6216.12            |
| A_68_P24066928 | chr5:125921960-125922004                          | NM_029752:45       | Bri3bp     | INSIDE                 | 1.571                                                        | 1.735                          | 1634.18            | 2835.85            | 2.727                          | 1390.05            | 3790.44            |
| A_68_P24066931 | chr5:125922400-125922444                          | NM_029752:485      | Bri3bp     | INSIDE                 | 1.693                                                        | 1.474                          | 678.49             | 1000.22            | 2.495                          | 592.40             | 1478.08            |
| A_68_P31124371 | chr17:28938550-28938594                           | NM_001081315:502   | Brp3       | INSIDE                 | 1.802                                                        | 6.412                          | 13892.16           | 89073.98           | 11.552                         | 9383.17            | 108395.60          |
| A_68_P30990999 | chr16:96304407-96304451                           | NM_145125:-393     | Brwd1      | PROMOTER               | 1.570                                                        | 2.758                          | 5273.40            | 14544.89           | 4.331                          | 3882.58            | 16817.11           |
| A_68_P27278356 | chr10:79167062-79167106                           | NM_001077184:-18   | Bsg        | PROMOTER               | 1.756                                                        | 1.921                          | 932.44             | 1791.45            | 3.373                          | 697.13             | 2351.69            |
| A_68_P27308088 | chr10:84849580-84849624                           | NM_028709:44       | Btbd11     | INSIDE                 | 1.577                                                        | 2.863                          | 487.57             | 1395.76            | 4.515                          | 441.56             | 1993.86            |
| A_68_P28149790 | chr11:114652964-114653008                         | NM_028055:4220     | Btbd17     | INSIDE                 | 2.356                                                        | 6.334                          | 2909.45            | 18427.57           | 14.919                         | 2289.11            | 34151.24           |
| A_68_P21673356 | chr2:138082901-138082945                          | NM_001025431:603   | Btbd3      | INSIDE                 | 1.619                                                        | 1.438                          | 3011.91            | 4330.58            | 2.328                          | 2338.35            | 5442.63            |
| A_68_P28694110 | chr12:104116592-104116636                         | NM_172806:2        | Btbd7      | INSIDE                 | 1.515                                                        | 1.901                          | 366.82             | 697.42             | 2.881                          | 341.52             | 984.04             |
| A_68_P30895871 | chr16:78377255-78377299                           | NM_009770:-246     | Btg3       | PROMOTER               | 1.577                                                        | 3.362                          | 738.15             | 2481.85            | 5.303                          | 628.77             | 3334.18            |

| ProbeName      | Target position of probe on CpG island microarray | TargetID           | GeneSymbol    | CpG island Description | Ratio of relative methylation (TiO <sub>2</sub> -NP/Vehicle) | Sham group                     |                    |                    | TiO <sub>2</sub> -H group      |                    |                    |
|----------------|---------------------------------------------------|--------------------|---------------|------------------------|--------------------------------------------------------------|--------------------------------|--------------------|--------------------|--------------------------------|--------------------|--------------------|
|                |                                                   |                    |               |                        |                                                              | Relative methylation (Cy5/Cy3) | Cy3 signal (Input) | Cy5 signal (MeDIP) | Relative methylation (Cy5/Cy3) | Cy3 signal (Input) | Cy5 signal (MeDIP) |
| A_68_P28881600 | chr13:23556264-23556308                           | NM_013483:1484     | Btn1a1        | INSIDE                 | 2.014                                                        | 3.623                          | 1561.40            | 5656.95            | 7.296                          | 1294.60            | 9445.96            |
| A_68_P27781640 | chr11:48982878-48982922                           | NM_172793:17691    | Btn19         | INSIDE                 | 1.548                                                        | 4.075                          | 2307.06            | 9401.42            | 6.310                          | 1769.63            | 11166.23           |
| A_68_P27781641 | chr11:48982982-48983026                           | NM_172793:17587    | Btn19         | INSIDE                 | 2.360                                                        | 0.624                          | 1571.69            | 981.26             | 1.473                          | 1783.94            | 2628.61            |
| A_68_P20258663 | chr1:58450520-58450564                            | NM_025824:563      | Bzw1          | INSIDE                 | 1.599                                                        | 3.266                          | 2398.42            | 7833.03            | 5.223                          | 2083.81            | 10883.14           |
| A_68_P20411731 | chr1:88256083-88256127                            | NR_015507:44       | C130036L24Rik | DIVERGENT_PROMOTER     | 1.584                                                        | 5.622                          | 3907.23            | 21965.87           | 8.906                          | 2878.08            | 25631.84           |
| A_68_P28596932 | chr12:85534521-85534565                           | NM_001163502:423   | C130039O16Rik | INSIDE                 | 1.629                                                        | 4.959                          | 3598.27            | 17843.45           | 8.078                          | 2828.40            | 22847.40           |
| A_68_P29187496 | chr13:83860499-83860543                           | NR_015561:-7190    | C130071C03Rik | PROMOTER               | 1.638                                                        | 4.605                          | 1216.96            | 5604.25            | 7.543                          | 1022.94            | 7716.25            |
| A_68_P24222816 | chr6:7794688-7794732                              | NM_052993:-513     | C1galt1       | PROMOTER               | 1.558                                                        | 2.112                          | 471.99             | 996.61             | 3.290                          | 390.46             | 1284.47            |
| A_68_P32328720 | chrX:35988386-35988430                            | NM_021550:-88      | C1galt1c1     | PROMOTER               | 1.674                                                        | 1.782                          | 1695.13            | 3021.24            | 2.983                          | 981.43             | 2927.47            |
| A_68_P28082450 | chr11:102809915-102809959                         | NM_011795:-2161    | C1q11         | PROMOTER               | 1.645                                                        | 1.681                          | 2048.14            | 3443.75            | 2.766                          | 1791.43            | 4955.48            |
| A_68_P21013699 | chr2:12932692-12932736                            | NM_153155:-223     | C1q13         | PROMOTER               | 2.302                                                        | 10.537                         | 2128.50            | 22428.25           | 24.254                         | 1494.20            | 36239.69           |
| A_68_P30478150 | chr15:98918593-98918637                           | NM_001024702:-455  | C1q14         | PROMOTER               | 2.059                                                        | 1.825                          | 1640.51            | 2993.20            | 3.756                          | 1345.67            | 5054.11            |
| A_68_P30478144 | chr15:98917975-98918019                           | NM_001024702:163   | C1q14         | INSIDE                 | 1.589                                                        | 10.977                         | 841.38             | 9235.98            | 17.442                         | 720.72             | 12570.65           |
| A_68_P21419450 | chr2:90726161-90726205                            | NM_026161:240      | C1qtnf4       | INSIDE                 | 1.985                                                        | 3.211                          | 2122.23            | 6815.20            | 6.373                          | 1771.75            | 11291.25           |
| A_68_P21419479 | chr2:90729985-90730029                            | NM_026161:4064     | C1qtnf4       | INSIDE                 | 1.707                                                        | 11.448                         | 561.15             | 6424.04            | 19.545                         | 476.10             | 9305.58            |
| A_68_P21419477 | chr2:90729763-90729807                            | NM_026161:3842     | C1qtnf4       | INSIDE                 | 1.508                                                        | 2.241                          | 777.41             | 1742.33            | 3.381                          | 697.75             | 2358.80            |
| A_68_P26536114 | chr9:56265361-56265405                            | NM_172924:475      | C230081A13Rik | INSIDE                 | 1.612                                                        | 3.543                          | 2542.05            | 9007.74            | 5.713                          | 1874.16            | 10706.98           |
| A_68_P23351277 | chr4:138908735-138908779                          | NM_001039200:249   | C230096C10Rik | INSIDE                 | 2.039                                                        | 5.358                          | 960.53             | 5146.29            | 10.923                         | 813.03             | 8880.43            |
| A_68_P22338534 | chr3:94167626-94167670                            | NM_001136117:1283  | C2cd4d        | INSIDE                 | 1.873                                                        | 6.728                          | 2320.94            | 15615.16           | 12.603                         | 1545.88            | 19482.20           |
| A_68_P22338541 | chr3:94168285-94168329                            | NM_001136117:1941  | C2cd4d        | INSIDE                 | 1.808                                                        | 5.376                          | 5230.63            | 28118.47           | 9.722                          | 4155.52            | 40398.62           |
| A_68_P25022916 | chr7:29415707-29415751                            | NM_175319:306      | C330005M16Rik | INSIDE                 | 1.733                                                        | 1.796                          | 1168.65            | 2099.07            | 3.113                          | 1029.93            | 3205.78            |
| A_68_P28153096 | chr11:115229081-115229125                         | NM_175454:-69      | C630004H02Rik | PROMOTER               | 1.922                                                        | 6.389                          | 5115.22            | 32680.12           | 12.279                         | 3916.94            | 48094.92           |
| A_68_P23295623 | chr4:128900595-128900639                          | NM_001033189:25071 | C77080        | INSIDE                 | 1.565                                                        | 2.201                          | 993.95             | 2187.89            | 3.445                          | 861.28             | 2967.49            |
| A_68_P32576281 | chrX:101395430-101395474                          | NM_001077354:1004  | C77370        | INSIDE                 | 2.536                                                        | 5.175                          | 658.04             | 3405.35            | 13.124                         | 385.33             | 5057.16            |
| A_68_P32576283 | chrX:101395692-101395736                          | NM_001077354:742   | C77370        | INSIDE                 | 2.033                                                        | 6.035                          | 5902.41            | 35622.69           | 12.267                         | 3428.34            | 42055.65           |
| A_68_P32576286 | chrX:101396172-101396216                          | NM_001077354:262   | C77370        | INSIDE                 | 1.599                                                        | 4.081                          | 7479.24            | 30522.25           | 6.527                          | 6051.21            | 39497.18           |
| A_68_P32576287 | chrX:101396366-101396410                          | NM_001077354:68    | C77370        | INSIDE                 | 1.504                                                        | 4.104                          | 553.75             | 2272.55            | 6.172                          | 442.53             | 2731.40            |
| A_68_P29009048 | chr13:46764994-46765038                           | NM_001033192:126   | C78339        | INSIDE                 | 1.574                                                        | 2.856                          | 1542.16            | 4404.73            | 4.497                          | 1400.30            | 6296.65            |
| A_68_P29009046 | chr13:46764820-46764864                           | NM_001033192:-48   | C78339        | PROMOTER               | 1.632                                                        | 1.658                          | 654.49             | 1085.11            | 2.705                          | 563.16             | 1523.44            |
| A_68_P27257833 | chr10:75130195-75130239                           | NM_172549:96886    | Cabin1        | INSIDE                 | 2.088                                                        | 4.864                          | 1348.50            | 6558.82            | 10.158                         | 1195.82            | 12146.99           |
| A_68_P26019650 | chr8:86938371-86938415                            | NM_007578:-870     | Cacna1a       | PROMOTER               | 1.678                                                        | 2.045                          | 684.93             | 1400.45            | 3.431                          | 614.58             | 2108.74            |
| A_68_P24791280 | chr6:119057361-119057405                          | NM_001159533:825   | Cacna1c       | INSIDE                 | 1.775                                                        | 3.638                          | 2783.45            | 10125.32           | 6.457                          | 2185.01            | 14109.12           |
| A_68_P26808316 | chr9:107302358-107302402                          | NM_001174047:170   | Cacna2d2      | INSIDE                 | 1.933                                                        | 3.324                          | 3446.50            | 11455.10           | 6.425                          | 2700.40            | 17350.81           |
| A_68_P28053984 | chr11:97883326-97883370                           | NM_001159320:-3662 | Cacnb1        | PROMOTER               | 1.777                                                        | 3.533                          | 2587.31            | 9140.65            | 6.279                          | 1866.76            | 11721.27           |
| A_68_P28053990 | chr11:97883852-97883896                           | NM_001159320:-4188 | Cacnb1        | PROMOTER               | 1.526                                                        | 1.645                          | 2003.46            | 3296.48            | 2.511                          | 1678.37            | 4215.21            |
| A_68_P21221051 | chr2:52531541-52531585                            | NM_001037099:539   | Cacnb4        | INSIDE                 | 1.994                                                        | 6.214                          | 1722.92            | 10705.97           | 12.392                         | 1153.42            | 14292.68           |
| A_68_P30357053 | chr15:77825858-77825902                           | NM_007583:123830   | Cacng2        | INSIDE                 | 1.534                                                        | 3.795                          | 7182.40            | 27260.62           | 5.824                          | 5370.61            | 31279.25           |
| A_68_P30357863 | chr15:77950040-77950084                           | NM_007583:-352     | Cacng2        | PROMOTER               | 1.517                                                        | 2.852                          | 1563.96            | 4460.78            | 4.328                          | 1372.23            | 5939.16            |
| A_68_P28109104 | chr11:107655957-107656001                         | NM_019431:-200     | Cacng4        | PROMOTER               | 1.522                                                        | 5.935                          | 2073.53            | 12305.65           | 9.033                          | 1748.37            | 15792.28           |
| A_68_P33005168 | chr7:3366552-3366596                              | NM_133189:29890    | Cacng7        | DOWNSTREAM             | 1.574                                                        | 3.885                          | 3043.52            | 11824.58           | 6.115                          | 2177.56            | 13315.37           |
| A_68_P26486127 | chr9:47339193-47339237                            | NM_001025600:780   | Cadm1         | INSIDE                 | 1.506                                                        | 2.674                          | 550.83             | 1472.74            | 4.026                          | 421.57             | 1697.37            |
| A_68_P26486134 | chr9:47339844-47339888                            | NM_001025600:1432  | Cadm1         | INSIDE                 | 1.559                                                        | 1.847                          | 612.83             | 1132.05            | 2.880                          | 470.46             | 1354.71            |
| A_68_P29413810 | chr14:13654360-13654404                           | NM_001042617:1211  | Cadps         | INSIDE                 | 1.750                                                        | 3.642                          | 2671.56            | 9730.57            | 6.374                          | 2240.68            | 14281.93           |
| A_68_P24298747 | chr6:23789611-23789655                            | NM_153163:-332     | Cadps2        | PROMOTER               | 1.585                                                        | 1.887                          | 2105.53            | 3972.97            | 2.991                          | 1721.36            | 5148.84            |
| A_68_P27566544 | chr11:5965149-5965193                             | NM_001174053:581   | Camk2b        | INSIDE                 | 1.932                                                        | 3.324                          | 2280.29            | 7579.09            | 6.420                          | 1796.50            | 11533.69           |
| A_68_P23345840 | chr4:138010011-138010055                          | NM_025451:-1030    | Camk2n1       | PROMOTER               | 1.519                                                        | 2.325                          | 1032.72            | 2401.05            | 3.531                          | 867.53             | 3063.29            |
| A_68_P24052105 | chr5:123213863-123213907                          | NM_001199676:15535 | Camkk2        | INSIDE                 | 1.545                                                        | 8.285                          | 1777.03            | 14721.93           | 12.803                         | 1302.84            | 16679.92           |

| ProbeName      | Target position of probe on CpG island microarray | TargetID          | GeneSymbol | CpG island Description | Ratio of relative methylation (TiO <sub>2</sub> -NP/Vehicle) | Sham group                     |                    |                    | TiO <sub>2</sub> -H group      |                    |                    |
|----------------|---------------------------------------------------|-------------------|------------|------------------------|--------------------------------------------------------------|--------------------------------|--------------------|--------------------|--------------------------------|--------------------|--------------------|
|                |                                                   |                   |            |                        |                                                              | Relative methylation (Cy5/Cy3) | Cy3 signal (Input) | Cy5 signal (MeDIP) | Relative methylation (Cy5/Cy3) | Cy3 signal (Input) | Cy5 signal (MeDIP) |
| A_68_P27788005 | chr11:50138862-50138906                           | NM_001110499:291  | Canx       | INSIDE                 | 1.970                                                        | 3.156                          | 5574.41            | 17595.39           | 6.220                          | 4426.17            | 27529.64           |
| A_68_P27788006 | chr11:50138948-50138992                           | NM_001110499:205  | Canx       | INSIDE                 | 1.951                                                        | 4.085                          | 5502.89            | 22480.34           | 7.970                          | 3802.85            | 30309.46           |
| A_68_P27788008 | chr11:50139149-50139193                           | NM_001110499:5    | Canx       | INSIDE                 | 1.875                                                        | 2.514                          | 5536.90            | 13918.62           | 4.712                          | 4124.56            | 19436.10           |
| A_68_P25354353 | chr7:105326510-105326554                          | NM_007602:171     | Capn5      | INSIDE                 | 2.116                                                        | 4.262                          | 3205.06            | 13658.50           | 9.017                          | 2370.02            | 21370.70           |
| A_68_P25354355 | chr7:105326695-105326739                          | NM_007602:-13     | Capn5      | PROMOTER               | 1.889                                                        | 3.757                          | 1433.93            | 5386.78            | 7.097                          | 1113.74            | 7904.33            |
| A_68_P25354354 | chr7:105326624-105326668                          | NM_007602:57      | Capn5      | INSIDE                 | 1.746                                                        | 5.034                          | 1591.36            | 8011.50            | 8.790                          | 1263.09            | 11102.05           |
| A_68_P29511369 | chr14:32149798-32149842                           | NM_009796:-89     | Capn7      | PROMOTER               | 1.678                                                        | 1.996                          | 1279.78            | 2554.88            | 3.350                          | 1041.19            | 3487.70            |
| A_68_P23350166 | chr4:138748616-138748660                          | NM_009798:-207    | Capzb      | PROMOTER               | 1.967                                                        | 3.798                          | 6080.09            | 23094.74           | 7.471                          | 4908.49            | 36671.62           |
| A_68_P23350170 | chr4:138749124-138749168                          | NM_001037761:253  | Capzb      | INSIDE                 | 1.904                                                        | 3.333                          | 401.15             | 1336.85            | 6.346                          | 334.45             | 2122.53            |
| A_68_P21958957 | chr3:14886237-14886281                            | NM_009801:-167    | Car2       | PROMOTER               | 1.622                                                        | 2.677                          | 743.86             | 1991.60            | 4.342                          | 579.74             | 2517.33            |
| A_68_P21958958 | chr3:14886343-14886387                            | NM_009801:-61     | Car2       | PROMOTER               | 1.758                                                        | 1.790                          | 329.27             | 589.39             | 3.146                          | 299.56             | 942.43             |
| A_68_P26129049 | chr8:107064933-107064977                          | NM_053070:248     | Car7       | INSIDE                 | 1.609                                                        | 4.243                          | 3692.17            | 15666.86           | 6.830                          | 2946.61            | 20123.93           |
| A_68_P30533736 | chr16:8672646-8672705                             | NM_025821:-429    | Carhsp1    | PROMOTER               | 1.649                                                        | 9.979                          | 1344.51            | 13416.96           | 16.451                         | 1050.57            | 17282.81           |
| A_68_P25655858 | chr8:11497803-11497847                            | NM_026995:257     | Carkd      | INSIDE                 | 1.594                                                        | 2.684                          | 1919.84            | 5153.21            | 4.279                          | 1524.74            | 6524.19            |
| A_68_P24205536 | chr6:4550713-4550757                              | NM_145398:-331    | Casd1      | PROMOTER               | 1.915                                                        | 5.905                          | 4018.61            | 23729.76           | 11.305                         | 3300.47            | 37312.12           |
| A_68_P24205541 | chr6:4551256-4551300                              | NM_145398:213     | Casd1      | INSIDE                 | 1.553                                                        | 4.127                          | 993.11             | 4098.52            | 6.408                          | 828.17             | 5306.98            |
| A_68_P32268347 | chrX:13423633-13423677                            | NM_009806:13      | Cask       | INSIDE                 | 2.352                                                        | 4.775                          | 4033.45            | 19260.09           | 11.231                         | 2219.51            | 24926.78           |
| A_68_P32268351 | chrX:13424038-13424082                            | NM_009806:-393    | Cask       | PROMOTER               | 1.745                                                        | 2.623                          | 3604.11            | 9455.09            | 4.577                          | 2141.76            | 9802.92            |
| A_68_P31097616 | chr17:24625344-24625388                           | NM_027937:-361    | Caskin1    | DIVERGENT_PROMOTER     | 1.500                                                        | 1.672                          | 796.20             | 1330.91            | 2.508                          | 669.03             | 1677.63            |
| A_68_P31097620 | chr17:24626114-24626158                           | NM_027937:409     | Caskin1    | INSIDE                 | 1.821                                                        | 1.379                          | 1840.28            | 2537.41            | 2.510                          | 1442.13            | 3620.09            |
| A_68_P28155403 | chr11:115664957-115665001                         | NM_080643:9928    | Caskin2    | INSIDE                 | 2.858                                                        | 7.044                          | 4618.06            | 32531.25           | 20.130                         | 3180.69            | 64028.48           |
| A_68_P25837064 | chr8:47702719-47702763                            | NM_009810:-62     | Casp3      | DIVERGENT_PROMOTER     | 2.255                                                        | 8.065                          | 13019.36           | 104998.00          | 18.182                         | 9442.59            | 171689.80          |
| A_68_P23397281 | chr4:148275240-148275284                          | NM_027195:96762   | Cas21      | INSIDE                 | 2.472                                                        | 7.602                          | 17403.01           | 132294.10          | 18.791                         | 11859.44           | 222849.10          |
| A_68_P23397206 | chr4:148265535-148265579                          | NM_027195:87056   | Cas21      | INSIDE                 | 2.233                                                        | 5.561                          | 2267.31            | 12607.68           | 12.418                         | 1606.26            | 19945.99           |
| A_68_P23397279 | chr4:148275001-148275045                          | NM_027195:96522   | Cas21      | INSIDE                 | 2.053                                                        | 5.719                          | 3282.49            | 18772.41           | 11.740                         | 2431.91            | 28550.31           |
| A_68_P23396578 | chr4:148179082-148179126                          | NM_027195:604     | Cas21      | INSIDE                 | 1.973                                                        | 5.530                          | 2948.56            | 16304.53           | 10.908                         | 2126.42            | 23195.85           |
| A_68_P23397204 | chr4:148265329-148265373                          | NM_027195:86850   | Cas21      | INSIDE                 | 1.513                                                        | 1.413                          | 1598.88            | 2258.72            | 2.138                          | 1270.07            | 2715.47            |
| A_68_P26132023 | chr8:107694748-107694792                          | NM_001161456:197  | Cbfb       | INSIDE                 | 1.756                                                        | 4.825                          | 1548.46            | 7471.14            | 8.475                          | 1377.88            | 11677.23           |
| A_68_P26132026 | chr8:107695072-107695119                          | NM_001161456:522  | Cbfb       | INSIDE                 | 1.921                                                        | 1.830                          | 668.55             | 1223.14            | 3.515                          | 622.51             | 2188.07            |
| A_68_P26466435 | chr9:44041858-44041902                            | NM_007619:249     | Cbl        | INSIDE                 | 2.703                                                        | 8.729                          | 4609.01            | 40229.81           | 23.595                         | 3069.96            | 72435.80           |
| A_68_P30759540 | chr16:52031753-52031797                           | NM_001033238:113  | Cblb       | INSIDE                 | 1.869                                                        | 5.433                          | 3786.69            | 20574.64           | 10.156                         | 2974.85            | 30212.40           |
| A_68_P24995306 | chr7:20382177-20382221                            | NM_001161844:-40  | Cblc       | PROMOTER               | 1.740                                                        | 2.603                          | 3012.08            | 7840.71            | 4.530                          | 2502.69            | 11336.44           |
| A_68_P31140911 | chr17:31773548-31773592                           | NM_178224:506     | Cbs        | INSIDE                 | 1.954                                                        | 3.316                          | 7744.08            | 25678.94           | 6.479                          | 5771.70            | 37394.65           |
| A_68_P32026831 | chr19:25036147-25036191                           | NM_146097:-62     | Cbwd1      | PROMOTER               | 2.132                                                        | 6.201                          | 3613.13            | 22406.37           | 13.219                         | 2745.31            | 36290.47           |
| A_68_P28175309 | chr11:118884826-118884870                         | NM_007623:506     | Cbx2       | INSIDE                 | 2.158                                                        | 2.545                          | 1722.26            | 4382.75            | 5.492                          | 1449.00            | 7957.76            |
| A_68_P28175799 | chr11:118951917-118951961                         | NM_007625:-4387   | Cbx4       | PROMOTER               | 2.137                                                        | 5.608                          | 3193.53            | 17908.29           | 11.981                         | 2453.76            | 29398.49           |
| A_68_P28175418 | chr11:118898955-118898999                         | NM_013926:3251    | Cbx8       | DOWNSTREAM             | 1.925                                                        | 5.303                          | 2342.48            | 12422.04           | 10.206                         | 1877.46            | 19160.97           |
| A_68_P28175458 | chr11:118903402-118903447                         | NM_013926:-1197   | Cbx8       | PROMOTER               | 1.543                                                        | 2.606                          | 1629.10            | 4245.70            | 4.020                          | 1283.32            | 5159.52            |
| A_68_P28175491 | chr11:118907932-118907976                         | NM_013926:-5727   | Cbx8       | PROMOTER               | 1.989                                                        | 1.758                          | 536.84             | 943.64             | 3.497                          | 458.11             | 1601.84            |
| A_68_P26080249 | chr8:97441876-97441920                            | NM_001033533:100  | Ccdc102a   | INSIDE                 | 1.641                                                        | 1.764                          | 2006.98            | 3540.67            | 2.895                          | 1603.92            | 4644.14            |
| A_68_P24951825 | chr7:5008460-5008504                              | NM_146178:155     | Ccdc106    | INSIDE                 | 1.771                                                        | 2.209                          | 1864.31            | 4118.27            | 3.912                          | 1406.04            | 5500.30            |
| A_68_P27169799 | chr10:59079055-59079099                           | NM_001033259:364  | Ccdc109a   | INSIDE                 | 1.507                                                        | 1.574                          | 2053.34            | 3232.15            | 2.371                          | 1593.85            | 3779.80            |
| A_68_P31676224 | chr18:46471665-46471709                           | NM_001160399:-104 | Ccdc112    | PROMOTER               | 1.546                                                        | 5.163                          | 5877.27            | 30343.65           | 7.984                          | 4145.92            | 33101.35           |
| A_68_P27563898 | chr11:5441853-5441897                             | NM_134033:346     | Ccdc117    | INSIDE                 | 1.877                                                        | 5.498                          | 3920.15            | 21554.59           | 10.319                         | 3139.07            | 32391.51           |
| A_68_P26825039 | chr9:110558909-110558957                          | NM_028312:-74     | Ccdc12     | DIVERGENT_PROMOTER     | 1.785                                                        | 1.894                          | 1145.22            | 2168.99            | 3.380                          | 928.34             | 3138.11            |
| A_68_P26019095 | chr8:86794255-86794299                            | NM_026350:-17     | Ccdc130    | PROMOTER               | 1.532                                                        | 2.969                          | 3007.20            | 8927.37            | 4.548                          | 2405.15            | 10938.41           |
| A_68_P26430110 | chr9:37155994-37156038                            | NM_001081429:-39  | Ccdc15     | PROMOTER               | 1.561                                                        | 6.025                          | 3644.25            | 21958.08           | 9.405                          | 2772.80            | 26079.27           |

| ProbeName      | Target position of probe on CpG island microarray | TargetID           | GeneSymbol | CpG island Description | Ratio of relative methylation (TiO <sub>2</sub> -NP/Vehicle) | Sham group                     |                    |                    | TiO <sub>2</sub> -H group      |                    |                    |
|----------------|---------------------------------------------------|--------------------|------------|------------------------|--------------------------------------------------------------|--------------------------------|--------------------|--------------------|--------------------------------|--------------------|--------------------|
|                |                                                   |                    |            |                        |                                                              | Relative methylation (Cy5/Cy3) | Cy3 signal (Input) | Cy5 signal (MeDIP) | Relative methylation (Cy5/Cy3) | Cy3 signal (Input) | Cy5 signal (MeDIP) |
| A_68_P20972053 | chr2:5058960-5059004                              | NM_028804:161      | Ccdc3      | INSIDE                 | 1.669                                                        | 4.180                          | 648.95             | 2712.90            | 6.979                          | 534.03             | 3726.86            |
| A_68_P24039940 | chr5:121081339-121081383                          | NM_001195094:2884  | Ccdc42b    | INSIDE                 | 2.335                                                        | 2.020                          | 661.34             | 1335.89            | 4.717                          | 629.67             | 2969.92            |
| A_68_P28112958 | chr11:108286558-108286602                         | NM_029606:1        | Ccdc46     | INSIDE                 | 1.540                                                        | 1.840                          | 1341.81            | 2468.67            | 2.833                          | 1139.15            | 3226.70            |
| A_68_P30625227 | chr16:27388952-27388996                           | NM_001025615:-88   | Ccdc50     | PROMOTER               | 2.147                                                        | 4.727                          | 892.50             | 4218.57            | 10.148                         | 820.82             | 8329.36            |
| A_68_P27228310 | chr10:69651858-69651902                           | NM_001111121:92012 | Ccdc6      | INSIDE                 | 1.618                                                        | 5.707                          | 8650.37            | 49366.64           | 9.232                          | 5818.45            | 53714.59           |
| A_68_P26814987 | chr9:108362953-108362997                          | NM_133744:126      | Ccdc71     | INSIDE                 | 1.845                                                        | 3.061                          | 1718.26            | 5258.97            | 5.647                          | 1503.95            | 8493.19            |
| A_68_P26814990 | chr9:108363250-108363294                          | NM_133744:424      | Ccdc71     | INSIDE                 | 1.744                                                        | 2.571                          | 1714.86            | 4409.18            | 4.485                          | 1407.04            | 6309.96            |
| A_68_P31373927 | chr17:79234917-79234961                           | NM_181649:83       | Ccdc75     | INSIDE                 | 1.577                                                        | 2.673                          | 2020.61            | 5401.30            | 4.216                          | 1599.74            | 6744.32            |
| A_68_P31928777 | chr19:5457059-5457103                             | NM_198616:469      | Ccdc85b    | INSIDE                 | 1.532                                                        | 2.179                          | 1183.56            | 2579.21            | 3.338                          | 1028.36            | 3432.85            |
| A_68_P28727037 | chr12:109513497-109513541                         | NM_001159910:109   | Ccdc85c    | INSIDE                 | 1.767                                                        | 4.478                          | 592.81             | 2654.85            | 7.911                          | 592.78             | 4689.72            |
| A_68_P28727039 | chr12:109513784-109513828                         | NM_001159910:-179  | Ccdc85c    | PROMOTER               | 1.531                                                        | 3.067                          | 3029.72            | 9291.40            | 4.694                          | 2394.92            | 11242.71           |
| A_68_P24980671 | chr7:16871769-16871813                            | NM_172297:-1782    | Ccdc9      | PROMOTER               | 1.728                                                        | 4.829                          | 18022.74           | 87028.16           | 8.343                          | 12430.23           | 103702.10          |
| A_68_P28990871 | chr13:43655098-43655142                           | NM_001081059:440   | Ccdc90a    | INSIDE                 | 1.808                                                        | 4.884                          | 2329.94            | 11379.26           | 8.831                          | 1930.50            | 17047.94           |
| A_68_P24063264 | chr5:125342497-125342541                          | NM_144819:73       | Ccdc92     | INSIDE                 | 1.541                                                        | 1.589                          | 1082.41            | 1720.18            | 2.449                          | 961.94             | 2355.74            |
| A_68_P26883804 | chr9:121403538-121403582                          | NM_031161:1247     | Cck        | INSIDE                 | 1.634                                                        | 3.579                          | 904.53             | 3237.06            | 5.846                          | 706.74             | 4131.75            |
| A_68_P25392270 | chr7:112574421-112574465                          | NM_007627:109      | Cckbr      | INSIDE                 | 1.513                                                        | 3.964                          | 6148.54            | 24371.44           | 5.996                          | 5077.69            | 30446.86           |
| A_68_P27569029 | chr11:6447001-6447045                             | NM_001190343:133   | Ccm2       | INSIDE                 | 2.030                                                        | 7.059                          | 1906.52            | 13457.51           | 14.326                         | 1432.75            | 20526.24           |
| A_68_P25065443 | chr7:38893032-38893076                            | NM_007633:-545     | Cene1      | PROMOTER               | 1.913                                                        | 1.928                          | 2996.29            | 5777.92            | 3.690                          | 226.80             | 8216.66            |
| A_68_P22728457 | chr4:11118468-11118512                            | NM_001037134:-10   | Cene2      | PROMOTER               | 1.767                                                        | 2.141                          | 909.54             | 1947.35            | 3.783                          | 756.22             | 2860.48            |
| A_68_P32111326 | chr19:40905687-40905731                           | NM_172839:-60      | Cenj       | PROMOTER               | 1.569                                                        | 2.042                          | 377.81             | 771.60             | 3.205                          | 357.59             | 1146.05            |
| A_68_P22202889 | chr3:65762508-65762552                            | NM_019937:-383     | Cen11      | PROMOTER               | 2.137                                                        | 1.533                          | 854.67             | 1310.43            | 3.276                          | 727.96             | 2384.86            |
| A_68_P29338034 | chr13:11377821-113778205                          | NM_001081062:-167  | Ceno       | PROMOTER               | 2.475                                                        | 3.687                          | 601.99             | 2219.36            | 9.124                          | 484.42             | 4420.08            |
| A_68_P29338038 | chr13:113778161-113778205                         | NM_001081062:173   | Ceno       | INSIDE                 | 1.516                                                        | 1.461                          | 3379.73            | 4937.96            | 2.215                          | 2794.94            | 6190.79            |
| A_68_P26630618 | chr9:72833442-72833486                            | NM_001114328:107   | Cepg1      | INSIDE                 | 1.639                                                        | 1.961                          | 1956.95            | 3838.33            | 3.215                          | 1718.91            | 5526.45            |
| A_68_P20796837 | chr1:167775393-167775437                          | NM_001113391:56603 | Cd247      | INSIDE                 | 1.846                                                        | 3.316                          | 1024.24            | 3396.84            | 6.123                          | 945.61             | 5790.05            |
| A_68_P20796835 | chr1:167775162-167775206                          | NM_001113391:56373 | Cd247      | INSIDE                 | 1.656                                                        | 3.749                          | 1229.47            | 4609.55            | 6.210                          | 1193.88            | 7414.07            |
| A_68_P30747800 | chr16:49855504-49855548                           | NM_010581:-240     | Cd47       | PROMOTER               | 2.122                                                        | 2.349                          | 1331.03            | 3126.76            | 4.984                          | 933.56             | 4653.28            |
| A_68_P30686262 | chr16:38483294-38483338                           | NM_009855:24304    | Cd80       | INSIDE                 | 1.548                                                        | 3.799                          | 3027.88            | 11502.80           | 5.880                          | 2326.95            | 13681.60           |
| A_68_P24820868 | chr6:125444847-125444891                          | NM_007657:-95      | Cd9        | PROMOTER               | 2.390                                                        | 11.281                         | 9567.66            | 107930.20          | 26.957                         | 5477.58            | 147659.80          |
| A_68_P24820864 | chr6:125444507-125444551                          | NM_007657:245      | Cd9        | INSIDE                 | 1.633                                                        | 3.222                          | 799.10             | 2574.41            | 5.262                          | 716.17             | 3768.19            |
| A_68_P29639452 | chr14:60216844-60216888                           | NM_001168535:-70   | Cdadcl     | PROMOTER               | 1.946                                                        | 9.593                          | 6488.31            | 62244.12           | 18.664                         | 3827.68            | 71440.31           |
| A_68_P22449315 | chr3:116126619-116126663                          | NM_001080818:310   | Cdc14a     | INSIDE                 | 1.730                                                        | 3.289                          | 1221.99            | 4019.51            | 5.690                          | 1102.08            | 6270.97            |
| A_68_P26820784 | chr9:109778541-109778586                          | NM_007658:481      | Cdc25a     | INSIDE                 | 1.836                                                        | 7.655                          | 2446.19            | 18725.75           | 14.054                         | 1806.42            | 25386.49           |
| A_68_P27278225 | chr10:79144473-79144517                           | NM_177613:-445     | Cdc34      | PROMOTER               | 1.694                                                        | 2.650                          | 4981.62            | 13200.69           | 4.488                          | 3951.36            | 17732.59           |
| A_68_P23339473 | chr4:136913085-136913129                          | NM_009861:546      | Cdc42      | INSIDE                 | 1.525                                                        | 1.562                          | 644.29             | 1006.07            | 2.381                          | 953.81             | 2270.72            |
| A_68_P20872965 | chr1:181889796-181889840                          | NM_001033285:-1401 | Cdc42bpa   | PROMOTER               | 1.510                                                        | 1.895                          | 2361.56            | 4474.53            | 2.861                          | 1933.91            | 5532.09            |
| A_68_P28743717 | chr12:112615357-112615401                         | NM_183016:551      | Cdc42bpb   | INSIDE                 | 1.651                                                        | 11.373                         | 1430.70            | 16271.87           | 18.774                         | 1094.42            | 20546.89           |
| A_68_P31933966 | chr19:6320610-6320654                             | NM_001033342:14176 | Cdc42bpg   | INSIDE                 | 1.866                                                        | 2.451                          | 1328.64            | 3256.35            | 4.573                          | 993.63             | 4544.01            |
| A_68_P30362680 | chr15:78673148-78673192                           | NM_027219:94       | Cdc42ep1   | INSIDE                 | 1.883                                                        | 4.258                          | 1830.06            | 7792.26            | 8.016                          | 1529.47            | 12260.21           |
| A_68_P30362677 | chr15:78672776-78672820                           | NM_027219:-278     | Cdc42ep1   | PROMOTER               | 1.598                                                        | 2.451                          | 661.26             | 1620.50            | 3.915                          | 598.40             | 2342.69            |
| A_68_P31376853 | chr17:79753911-79753955                           | NM_026514:499      | Cdc42ep3   | INSIDE                 | 1.706                                                        | 1.929                          | 1057.53            | 2040.31            | 3.292                          | 870.61             | 2866.13            |
| A_68_P31376862 | chr17:79755142-79755186                           | NM_026514:-733     | Cdc42ep3   | PROMOTER               | 1.516                                                        | 1.712                          | 474.69             | 812.66             | 2.596                          | 415.37             | 1078.28            |
| A_68_P28143851 | chr11:113612678-113612722                         | NM_020006:-226     | Cdc42ep4   | PROMOTER               | 1.866                                                        | 5.437                          | 4581.48            | 24908.34           | 10.143                         | 3566.82            | 36177.86           |
| A_68_P27812111 | chr11:54600916-54600960                           | NM_178626:267      | Cdc42se2   | INSIDE                 | 1.553                                                        | 2.021                          | 2859.81            | 5779.07            | 3.138                          | 2218.76            | 6963.45            |
| A_68_P28059222 | chr11:98768831-98768880                           | NM_001025779:-347  | Cdc6       | PROMOTER               | 1.692                                                        | 7.625                          | 1315.70            | 10031.63           | 12.899                         | 995.61             | 12841.84           |
| A_68_P28752833 | chr12:114067608-114067652                         | NM_028023:-30      | Cdca4      | PROMOTER               | 2.176                                                        | 4.177                          | 2559.35            | 10690.00           | 9.089                          | 1848.78            | 16804.37           |
| A_68_P28752830 | chr12:114067331-114067375                         | NM_028023:248      | Cdca4      | INSIDE                 | 1.533                                                        | 3.522                          | 2449.67            | 8627.34            | 5.401                          | 1964.09            | 10607.28           |

| ProbeName      | Target position of probe on CpG island microarray | TargetID            | GeneSymbol | CpG island Description | Ratio of relative methylation (TiO <sub>2</sub> -NP/Vehicle) | Sham group                     |                    |                    | TiO <sub>2</sub> -H group      |                    |                    |
|----------------|---------------------------------------------------|---------------------|------------|------------------------|--------------------------------------------------------------|--------------------------------|--------------------|--------------------|--------------------------------|--------------------|--------------------|
|                |                                                   |                     |            |                        |                                                              | Relative methylation (Cy5/Cy3) | Cy3 signal (Input) | Cy5 signal (MeDIP) | Relative methylation (Cy5/Cy3) | Cy3 signal (Input) | Cy5 signal (MeDIP) |
| A_68_P31524836 | chr18:16965652-16965696                           | NM_007664:1884      | Cdh2       | INSIDE                 | 1.542                                                        | 5.347                          | 1273.88            | 6811.52            | 8.243                          | 1060.08            | 8737.75            |
| A_68_P31524834 | chr18:16965463-16965507                           | NM_007664:2074      | Cdh2       | INSIDE                 | 1.514                                                        | 1.442                          | 5317.30            | 7667.13            | 2.183                          | 4181.25            | 9127.82            |
| A_68_P27176099 | chr10:60150136-60150180                           | NM_023370:9080      | Cdh23      | INSIDE                 | 1.509                                                        | 2.178                          | 935.31             | 2037.03            | 3.287                          | 895.72             | 2944.61            |
| A_68_P26140014 | chr8:109035535-109035580                          | NM_001037809:745    | Cdh3       | INSIDE                 | 1.993                                                        | 3.372                          | 10881.57           | 36690.04           | 6.721                          | 7717.80            | 51872.65           |
| A_68_P21897030 | chr2:179177570-179177614                          | NM_009867:410       | Cdh4       | INSIDE                 | 1.833                                                        | 3.684                          | 2559.17            | 9428.91            | 6.755                          | 2105.20            | 14221.06           |
| A_68_P30026213 | chr15:13102919-13102963                           | NM_007666:454       | Cdh6       | INSIDE                 | 1.603                                                        | 2.861                          | 2518.02            | 7205.20            | 4.586                          | 2042.09            | 9365.27            |
| A_68_P26102845 | chr8:101939884-101939928                          | NM_001039154:451    | Cdh8       | INSIDE                 | 1.587                                                        | 2.112                          | 3141.75            | 6636.81            | 3.352                          | 2242.95            | 7519.00            |
| A_68_P26102842 | chr8:101939617-101939661                          | NM_001039154:719    | Cdh8       | INSIDE                 | 1.509                                                        | 4.432                          | 1458.56            | 6464.77            | 6.686                          | 1284.16            | 8586.35            |
| A_68_P27351976 | chr10:92623453-92623497                           | NM_146239:-146      | Cdk17      | PROMOTER               | 1.757                                                        | 4.366                          | 815.31             | 3559.77            | 7.669                          | 642.05             | 4924.18            |
| A_68_P27351975 | chr10:92623318-92623362                           | NM_146239:-280      | Cdk17      | PROMOTER               | 1.631                                                        | 5.287                          | 5246.48            | 27740.47           | 8.626                          | 4202.19            | 36248.87           |
| A_68_P27083521 | chr10:40069136-40069180                           | NM_001168304:45     | Cdk19      | INSIDE                 | 2.272                                                        | 7.152                          | 461.33             | 3299.64            | 16.254                         | 351.42             | 5711.81            |
| A_68_P24060833 | chr5:124803880-124803924                          | NM_013812:735       | Cdk2ap1    | INSIDE                 | 1.948                                                        | 8.285                          | 867.65             | 7188.25            | 16.135                         | 691.74             | 11161.30           |
| A_68_P28047527 | chr11:96777858-96777902                           | NM_030248:-85       | Cdk5rap3   | PROMOTER               | 2.231                                                        | 9.254                          | 3176.78            | 29398.85           | 20.649                         | 1753.53            | 36208.26           |
| A_68_P23444287 | chr5:3341583-3341627                              | NM_009873:-2707     | Cdk6       | PROMOTER               | 1.824                                                        | 3.467                          | 2545.92            | 8825.46            | 6.323                          | 1807.56            | 11428.91           |
| A_68_P24167580 | chr5:147072895-147072939                          | NM_153599:29666     | Cdk8       | INSIDE                 | 1.668                                                        | 2.767                          | 354.85             | 982.03             | 4.616                          | 296.88             | 1370.38            |
| A_68_P24864240 | chr6:134871160-134871204                          | NM_009875:764       | Cdkn1b     | INSIDE                 | 1.673                                                        | 2.662                          | 3361.10            | 8948.92            | 4.453                          | 2603.18            | 11592.14           |
| A_68_P24864235 | chr6:134870715-134870759                          | NM_009875:318       | Cdkn1b     | INSIDE                 | 1.707                                                        | 1.405                          | 1767.54            | 2483.14            | 2.397                          | 1419.21            | 3402.40            |
| A_68_P23094811 | chr4:88940707-88940751                            | NM_009877:-205      | Cdkn2a     | PROMOTER               | 1.630                                                        | 1.577                          | 574.53             | 906.09             | 2.571                          | 449.85             | 1156.63            |
| A_68_P23201928 | chr4:109330089-109330133                          | NM_007671:7867      | Cdkn2c     | DOWNSTREAM             | 1.816                                                        | 2.840                          | 954.42             | 2710.40            | 5.157                          | 785.33             | 4050.01            |
| A_68_P29578138 | chr14:47380037-47380081                           | NM_028222:-157      | Cdkn3      | PROMOTER               | 2.191                                                        | 1.390                          | 1576.79            | 2191.73            | 3.046                          | 1182.31            | 3601.48            |
| A_68_P21639427 | chr2:132088879-132088923                          | NM_138651:-92       | Cds2       | DIVERGENT_PROMOTER     | 1.609                                                        | 4.699                          | 469.43             | 2205.66            | 7.559                          | 401.49             | 3035.01            |
| A_68_P24172967 | chr5:148116571-148116615                          | NM_007673:2233      | Cdx2       | INSIDE                 | 1.721                                                        | 4.316                          | 1295.33            | 5590.72            | 7.427                          | 1017.59            | 7557.83            |
| A_68_P30567429 | chr16:15887235-15887279                           | NM_007679:-122      | Cebpd      | PROMOTER               | 2.546                                                        | 13.072                         | 7367.64            | 96311.68           | 33.284                         | 5181.40            | 172455.10          |
| A_68_P30567436 | chr16:15887941-15887985                           | NM_007679:584       | Cebpd      | INSIDE                 | 1.602                                                        | 4.663                          | 696.93             | 3249.69            | 7.469                          | 603.47             | 4507.38            |
| A_68_P25047313 | chr7:35841354-35841398                            | NM_009884:209       | Cebpg      | INSIDE                 | 1.700                                                        | 1.809                          | 3138.06            | 5676.12            | 3.075                          | 2564.46            | 7886.72            |
| A_68_P24799551 | chr6:120615439-120615483                          | NM_001128151:-978   | Cecr2      | PROMOTER               | 1.512                                                        | 2.599                          | 2655.71            | 6901.62            | 3.928                          | 2199.66            | 8641.34            |
| A_68_P24798780 | chr6:120442970-120443014                          | NM_033567:833       | Cecr6      | INSIDE                 | 1.855                                                        | 9.906                          | 4627.20            | 45837.77           | 18.374                         | 3197.85            | 58756.19           |
| A_68_P31565714 | chr18:25645254-25645298                           | NM_001146292:267208 | Celf4      | INSIDE                 | 1.775                                                        | 2.149                          | 1952.48            | 4194.93            | 3.813                          | 1584.88            | 6043.79            |
| A_68_P31565718 | chr18:25645741-25645785                           | NM_001146292:266722 | Celf4      | INSIDE                 | 1.746                                                        | 1.912                          | 1475.53            | 2821.49            | 3.339                          | 1166.82            | 3896.56            |
| A_68_P27289987 | chr10:80945075-80945119                           | NM_176954:358       | Celf5      | INSIDE                 | 2.128                                                        | 8.817                          | 8860.98            | 78128.69           | 18.767                         | 4829.56            | 90637.92           |
| A_68_P22412541 | chr3:108218746-108218790                          | NM_001004177:-356   | Celsr2     | PROMOTER               | 2.381                                                        | 3.887                          | 1745.81            | 6786.45            | 9.257                          | 1460.57            | 13520.87           |
| A_68_P26816895 | chr9:108734927-108734971                          | NM_080437:6298      | Celsr3     | INSIDE                 | 1.600                                                        | 4.517                          | 3492.77            | 15777.49           | 7.229                          | 2474.22            | 17885.33           |
| A_68_P26816894 | chr9:108734858-108734902                          | NM_080437:6230      | Celsr3     | INSIDE                 | 1.580                                                        | 3.081                          | 4378.64            | 13489.38           | 4.868                          | 3369.52            | 16404.32           |
| A_68_P20740950 | chr1:157820522-157820566                          | NM_001039184:-159   | Cep350     | PROMOTER               | 1.839                                                        | 2.129                          | 1799.19            | 3830.65            | 3.916                          | 1451.01            | 5682.19            |
| A_68_P32099204 | chr19:38129403-38129447                           | NM_028293:-90       | Cep55      | PROMOTER               | 2.661                                                        | 14.261                         | 12747.94           | 181792.80          | 37.952                         | 7793.33            | 295773.50          |
| A_68_P32099202 | chr19:38129262-38129306                           | NM_028293:-230      | Cep55      | PROMOTER               | 2.173                                                        | 8.598                          | 14671.61           | 126142.50          | 18.683                         | 9111.35            | 170231.80          |
| A_68_P27630622 | chr11:20149303-20149348                           | NM_172260:102       | Cep68      | INSIDE                 | 1.818                                                        | 6.231                          | 2082.62            | 12977.22           | 11.331                         | 1861.11            | 21088.80           |
| A_68_P29144056 | chr13:74199745-74199789                           | NM_028959:-33       | Cep72      | PROMOTER               | 2.243                                                        | 5.603                          | 3753.23            | 21030.95           | 12.567                         | 2544.14            | 31972.55           |
| A_68_P21099935 | chr2:29724646-29724690                            | NM_207298:-345      | Cercam     | PROMOTER               | 2.016                                                        | 4.334                          | 846.01             | 3666.90            | 8.736                          | 713.80             | 6236.04            |
| A_68_P31929035 | chr19:5490695-5490739                             | NM_007687:262       | Cfl1       | INSIDE                 | 1.782                                                        | 3.659                          | 3764.08            | 13772.99           | 6.520                          | 2853.19            | 18602.65           |
| A_68_P28449512 | chr12:55963938-55963982                           | NM_007688:-96       | Cfl2       | PROMOTER               | 1.617                                                        | 1.882                          | 1457.03            | 2742.45            | 3.044                          | 1200.81            | 3655.76            |
| A_68_P30822064 | chr16:64851589-64851633                           | NM_178647:-300      | Cggbp1     | PROMOTER               | 1.571                                                        | 1.499                          | 3489.85            | 5231.78            | 2.355                          | 2884.05            | 6790.67            |
| A_68_P22340674 | chr3:94590393-94590437                            | NM_001037711:23     | Cgn        | INSIDE                 | 1.781                                                        | 2.740                          | 3234.59            | 8862.34            | 4.881                          | 2421.32            | 11818.44           |
| A_68_P30379103 | chr15:81524969-81525013                           | NM_001164320:2727   | Chad1      | INSIDE                 | 1.863                                                        | 5.182                          | 1487.64            | 7708.88            | 9.656                          | 1312.39            | 12672.07           |
| A_68_P22695196 | chr4:3866420-3866464                              | NM_001190322:382    | Chchd7     | INSIDE                 | 1.561                                                        | 3.322                          | 1286.05            | 4272.59            | 5.187                          | 980.84             | 5087.42            |
| A_68_P22695192 | chr4:3865915-3865959                              | NM_001190323:-98    | Chchd7     | DIVERGENT_PROMOTER     | 1.539                                                        | 2.922                          | 3388.26            | 9901.35            | 4.496                          | 2546.72            | 11450.11           |
| A_68_P22355191 | chr3:97414110-97414154                            | NM_026539:-19       | Chd11      | PROMOTER               | 1.532                                                        | 4.639                          | 481.16             | 2232.03            | 7.109                          | 455.84             | 3240.45            |

| ProbeName      | Target position of probe on CpG island microarray | TargetID          | GeneSymbol | CpG island Description | Ratio of relative methylation (TiO <sub>2</sub> -NP/Vehicle) | Sham group                     |                    |                    | TiO <sub>2</sub> -H group      |                    |                    |
|----------------|---------------------------------------------------|-------------------|------------|------------------------|--------------------------------------------------------------|--------------------------------|--------------------|--------------------|--------------------------------|--------------------|--------------------|
|                |                                                   |                   |            |                        |                                                              | Relative methylation (Cy5/Cy3) | Cy3 signal (Input) | Cy5 signal (MeDIP) | Relative methylation (Cy5/Cy3) | Cy3 signal (Input) | Cy5 signal (MeDIP) |
| A_68_P23418114 | chr4:151712427-151712471                          | NM_001081376:-311 | Chd5       | PROMOTER               | 1.581                                                        | 2.138                          | 1253.46            | 2679.94            | 3.379                          | 968.47             | 3272.88            |
| A_68_P22715810 | chr4:8617868-8617912                              | NM_001081417:-177 | Chd7       | PROMOTER               | 1.534                                                        | 4.212                          | 492.27             | 2073.62            | 6.460                          | 414.93             | 2680.59            |
| A_68_P26055737 | chr8:93432164-93432208                            | NM_177224:79453   | Chd9       | INSIDE                 | 1.778                                                        | 5.839                          | 1278.96            | 7467.43            | 10.384                         | 1034.28            | 10739.74           |
| A_68_P32572442 | chrX:100551806-100551850                          | NM_009767:14      | Chic1      | INSIDE                 | 1.822                                                        | 3.938                          | 3190.05            | 12563.39           | 7.174                          | 1466.11            | 10517.46           |
| A_68_P25589538 | chr7:148725824-148725868                          | NM_001142681:-90  | Chid1      | PROMOTER               | 1.690                                                        | 2.157                          | 1913.62            | 4128.24            | 3.645                          | 1568.84            | 5718.28            |
| A_68_P31790565 | chr18:67365128-67365172                           | NM_024190:138     | Chmp1b     | INSIDE                 | 1.811                                                        | 3.225                          | 4755.01            | 15334.68           | 5.839                          | 3568.63            | 20838.37           |
| A_68_P30589274 | chr16:20733484-20733528                           | NM_009893:307     | Chrd       | INSIDE                 | 1.583                                                        | 1.426                          | 2944.10            | 4199.57            | 2.257                          | 2340.81            | 5284.08            |
| A_68_P25365140 | chr7:107154438-107154482                          | NM_133709:-453    | Chrdl2     | PROMOTER               | 2.099                                                        | 6.849                          | 440.36             | 3016.19            | 14.378                         | 378.06             | 5435.81            |
| A_68_P20162793 | chr1:38954859-38954904                            | NM_145142:124     | Chst10     | INSIDE                 | 1.689                                                        | 7.615                          | 3082.84            | 23475.55           | 12.859                         | 2404.60            | 30921.32           |
| A_68_P24631649 | chr6:90275213-90275257                            | NM_027928:-55     | Chst13     | DIVERGENT_PROMOTER     | 1.815                                                        | 1.643                          | 880.04             | 1445.53            | 2.982                          | 709.33             | 2115.11            |
| A_68_P21566993 | chr2:118752216-118752260                          | NM_028117:6       | Chst14     | INSIDE                 | 1.844                                                        | 4.062                          | 1825.71            | 7415.99            | 7.491                          | 1518.00            | 11371.36           |
| A_68_P21566994 | chr2:118752369-118752413                          | NM_028117:158     | Chst14     | INSIDE                 | 1.584                                                        | 2.111                          | 4274.41            | 9021.50            | 3.342                          | 3244.99            | 10846.08           |
| A_68_P26741575 | chr9:95307812-95307856                            | NM_018763:-145    | Chst2      | PROMOTER               | 2.020                                                        | 6.357                          | 3712.67            | 23602.70           | 12.843                         | 2845.78            | 36548.30           |
| A_68_P26741563 | chr9:95306199-95306243                            | NM_018763:1469    | Chst2      | INSIDE                 | 1.521                                                        | 1.952                          | 1403.78            | 2740.04            | 2.970                          | 1182.30            | 3511.08            |
| A_68_P27173119 | chr10:59681994-59682038                           | NM_016803:-8      | Chst3      | PROMOTER               | 1.707                                                        | 1.891                          | 3067.53            | 5801.21            | 3.228                          | 2489.26            | 8036.45            |
| A_68_P26170843 | chr8:114434234-114434278                          | NM_019950:-157    | Chst5      | PROMOTER               | 1.643                                                        | 2.517                          | 1320.48            | 3323.84            | 4.136                          | 1058.06            | 4375.93            |
| A_68_P32287119 | chrX:19637488-19637532                            | NM_021715:815     | Chst7      | INSIDE                 | 2.452                                                        | 3.851                          | 2163.89            | 8333.81            | 9.443                          | 1159.22            | 10946.07           |
| A_68_P32287125 | chrX:19638017-19638061                            | NM_021715:1343    | Chst7      | INSIDE                 | 1.773                                                        | 2.989                          | 484.37             | 1447.95            | 5.301                          | 264.32             | 1401.23            |
| A_68_P32130475 | chr19:44181890-44181934                           | NM_001162410:55   | Chuk       | INSIDE                 | 1.727                                                        | 3.622                          | 678.44             | 2457.12            | 6.254                          | 590.49             | 3693.13            |
| A_68_P26079748 | chr8:97362202-97362246                            | NM_134141:16      | Ciapin1    | INSIDE                 | 1.892                                                        | 2.871                          | 431.89             | 1240.15            | 5.432                          | 323.32             | 1756.29            |
| A_68_P25009418 | chr7:26067028-26067072                            | NM_001110131:-147 | Cic        | PROMOTER               | 2.126                                                        | 4.923                          | 27867.04           | 137201.80          | 10.469                         | 18156.34           | 190086.60          |
| A_68_P25009419 | chr7:26067406-26067450                            | NM_001110131:231  | Cic        | INSIDE                 | 1.714                                                        | 5.002                          | 3250.76            | 16259.68           | 8.575                          | 2867.73            | 24589.71           |
| A_68_P26141979 | chr8:109417535-109417579                          | NM_011574:17      | Cirh1a     | INSIDE                 | 1.609                                                        | 5.028                          | 1394.45            | 7010.82            | 8.089                          | 1220.21            | 9870.28            |
| A_68_P27234932 | chr10:70807397-70807441                           | NM_134007:179     | Cisd1      | INSIDE                 | 1.725                                                        | 5.434                          | 743.69             | 4041.59            | 9.376                          | 605.45             | 5676.99            |
| A_68_P32567806 | chrX:99447101-99447145                            | NM_007709:-14     | Cited1     | PROMOTER               | 1.823                                                        | 2.299                          | 570.23             | 1310.75            | 4.190                          | 323.08             | 1353.75            |
| A_68_P26971601 | chr10:17443503-17443547                           | NM_010828:491     | Cited2     | INSIDE                 | 1.593                                                        | 1.437                          | 1021.65            | 1468.46            | 2.290                          | 866.24             | 1983.53            |
| A_68_P28745339 | chr12:112908725-112908769                         | NM_021273:1803    | Ckb        | INSIDE                 | 1.586                                                        | 3.597                          | 1932.40            | 6951.18            | 5.703                          | 1796.13            | 10243.90           |
| A_68_P22032039 | chr3:31048745-31048789                            | NM_008770:-75     | Cldn11     | PROMOTER               | 2.122                                                        | 1.605                          | 1227.26            | 1969.46            | 3.405                          | 969.49             | 3301.02            |
| A_68_P31092997 | chr17:23816594-23816638                           | NM_018777:285     | Cldn6      | INSIDE                 | 1.846                                                        | 2.792                          | 6471.81            | 18068.45           | 5.154                          | 4832.01            | 24904.13           |
| A_68_P27898214 | chr11:69779823-69779867                           | NM_016887:922     | Cldn7      | INSIDE                 | 1.650                                                        | 3.957                          | 1568.10            | 6205.57            | 6.530                          | 1333.22            | 8705.40            |
| A_68_P30542887 | chr16:10545493-10545537                           | NM_001204229:83   | Clec16a    | INSIDE                 | 1.577                                                        | 3.144                          | 1929.46            | 6067.15            | 4.960                          | 1642.69            | 8147.72            |
| A_68_P30969546 | chr16:92498878-92498922                           | NM_172469:509     | Clic6      | INSIDE                 | 1.667                                                        | 6.182                          | 3756.63            | 23221.76           | 10.303                         | 2929.22            | 30179.61           |
| A_68_P27764455 | chr11:45665845-45665889                           | NM_001045520:401  | Clint1     | INSIDE                 | 1.572                                                        | 1.508                          | 1316.31            | 1985.46            | 2.371                          | 1074.77            | 2547.83            |
| A_68_P24057004 | chr5:124133945-124133989                          | NM_019765:334     | Clip1      | INSIDE                 | 1.911                                                        | 2.160                          | 864.01             | 1865.97            | 4.126                          | 813.86             | 3358.04            |
| A_68_P24057001 | chr5:124133506-124133550                          | NM_019765:772     | Clip1      | INSIDE                 | 1.679                                                        | 2.030                          | 4945.46            | 10040.83           | 3.408                          | 3721.90            | 12684.82           |
| A_68_P31336379 | chr17:72131880-72131924                           | NM_030179:616     | Clip4      | INSIDE                 | 1.820                                                        | 4.744                          | 765.70             | 3632.43            | 8.635                          | 671.28             | 5796.46            |
| A_68_P20258850 | chr1:58480309-58480353                            | NM_001042634:602  | Clk1       | INSIDE                 | 1.523                                                        | 1.658                          | 1405.07            | 2330.06            | 2.526                          | 1048.58            | 2648.61            |
| A_68_P22317617 | chr3:88973343-88973387                            | NM_001163432:4638 | Clk2       | INSIDE                 | 1.813                                                        | 7.739                          | 6628.02            | 51296.66           | 14.031                         | 4272.64            | 59947.78           |
| A_68_P26543678 | chr9:57612898-57612942                            | NM_007713:747     | Clk3       | INSIDE                 | 1.646                                                        | 2.204                          | 5441.20            | 11992.11           | 3.627                          | 4191.60            | 15201.53           |
| A_68_P23280751 | chr4:126234084-126234128                          | NM_175554:-117    | Clspn      | PROMOTER               | 1.707                                                        | 5.348                          | 1230.34            | 6580.06            | 9.127                          | 1117.06            | 10195.26           |
| A_68_P26756440 | chr9:97933663-97933707                            | NM_022319:-98     | Clstn2     | PROMOTER               | 1.876                                                        | 9.816                          | 3587.04            | 35211.04           | 18.414                         | 3006.61            | 55364.42           |
| A_68_P24906444 | chr6:142705194-142705238                          | NM_009908:11      | Cmas       | INSIDE                 | 1.615                                                        | 4.227                          | 1261.52            | 5332.30            | 6.828                          | 1003.63            | 6852.26            |
| A_68_P23999133 | chr5:114064391-114064435                          | NM_008153:35987   | Cmklr1     | INSIDE                 | 1.799                                                        | 5.553                          | 1505.92            | 8362.64            | 9.989                          | 1033.77            | 10325.81           |
| A_68_P26127993 | chr8:106865035-106865079                          | NM_024217:563     | Cmtm3      | INSIDE                 | 1.519                                                        | 1.997                          | 1888.06            | 3770.79            | 3.034                          | 1463.37            | 4439.83            |
| A_68_P26128337 | chr8:106919324-106919368                          | NM_153582:250     | Cmtm4      | INSIDE                 | 1.654                                                        | 6.030                          | 3389.72            | 20441.46           | 9.976                          | 2593.04            | 25869.13           |
| A_68_P26846741 | chr9:114753280-114753324                          | NM_027294:-32     | Cmtm8      | PROMOTER               | 1.720                                                        | 4.235                          | 8858.42            | 37512.78           | 7.283                          | 7283.97            | 53046.75           |
| A_68_P31890103 | chr18:84855123-84855167                           | NM_023149:-119    | Cndp2      | PROMOTER               | 1.507                                                        | 2.250                          | 7270.70            | 16356.27           | 3.391                          | 5158.92            | 17494.56           |

| ProbeName      | Target position of probe on CpG island microarray | TargetID          | GeneSymbol | CpG island Description | Ratio of relative methylation (TiO <sub>2</sub> -NP/Vehicle) | Sham group                     |                    |                    | TiO <sub>2</sub> -H group      |                    |                    |
|----------------|---------------------------------------------------|-------------------|------------|------------------------|--------------------------------------------------------------|--------------------------------|--------------------|--------------------|--------------------------------|--------------------|--------------------|
|                |                                                   |                   |            |                        |                                                              | Relative methylation (Cy5/Cy3) | Cy3 signal (Input) | Cy5 signal (MeDIP) | Relative methylation (Cy5/Cy3) | Cy3 signal (Input) | Cy5 signal (MeDIP) |
| A_68_P32769550 | chrX:154480805-154480849                          | NM_177751:216     | Cnksr2     | INSIDE                 | 1.512                                                        | 2.146                          | 1326.45            | 2845.95            | 3.244                          | 822.04             | 2667.04            |
| A_68_P20148714 | chr1:36568619-36568663                            | NM_001039551:-80  | Cnnm3      | PROMOTER               | 2.117                                                        | 8.917                          | 14587.91           | 130076.10          | 18.878                         | 10155.26           | 191711.20          |
| A_68_P20148721 | chr1:36569446-36569490                            | NM_001039551:748  | Cnnm3      | INSIDE                 | 1.659                                                        | 5.939                          | 2091.84            | 12424.11           | 9.855                          | 1726.52            | 17014.04           |
| A_68_P20148715 | chr1:36568684-36568728                            | NM_001039551:-14  | Cnnm3      | PROMOTER               | 1.602                                                        | 2.142                          | 3211.45            | 6880.19            | 3.431                          | 2505.82            | 8597.79            |
| A_68_P27476522 | chr10:116018238-116018282                         | NM_001037846:307  | Cnot2      | INSIDE                 | 2.636                                                        | 8.518                          | 13218.99           | 112595.80          | 22.456                         | 8717.08            | 195749.60          |
| A_68_P27476528 | chr10:116018985-116019029                         | NM_001037846:-439 | Cnot2      | PROMOTER               | 1.657                                                        | 3.208                          | 4435.27            | 14229.05           | 5.315                          | 3475.66            | 18474.40           |
| A_68_P27476525 | chr10:116018687-116018731                         | NM_001037846:-141 | Cnot2      | PROMOTER               | 1.501                                                        | 2.634                          | 907.22             | 2389.64            | 3.952                          | 776.04             | 3067.27            |
| A_68_P24359955 | chr6:35083485-35083529                            | NM_001164412:231  | Cnot4      | INSIDE                 | 1.889                                                        | 3.638                          | 4126.95            | 15015.24           | 6.874                          | 3480.07            | 23921.77           |
| A_68_P27784450 | chr11:49525550-49525594                           | NM_212484:640     | Cnot6      | INSIDE                 | 1.908                                                        | 2.634                          | 3975.65            | 10469.93           | 5.025                          | 3106.29            | 15610.64           |
| A_68_P27784449 | chr11:49525483-49525527                           | NM_212484:708     | Cnot6      | INSIDE                 | 1.515                                                        | 4.727                          | 1217.49            | 5755.20            | 7.160                          | 1081.63            | 7744.99            |
| A_68_P20622147 | chr1:134439405-134439449                          | NM_177129:91      | Cntn2      | INSIDE                 | 1.760                                                        | 7.013                          | 3736.09            | 26202.98           | 12.345                         | 2879.07            | 35542.74           |
| A_68_P21285107 | chr2:65077163-65077207                            | NM_027225:-501    | Cobll1     | PROMOTER               | 1.909                                                        | 4.523                          | 6122.86            | 27694.30           | 8.633                          | 4521.21            | 39031.95           |
| A_68_P29729812 | chr14:76153932-76153976                           | NM_177381:346     | Cog3       | INSIDE                 | 1.587                                                        | 1.418                          | 1256.41            | 1781.25            | 2.249                          | 1056.18            | 2375.74            |
| A_68_P27183504 | chr10:61441353-61441397                           | NM_007731:482     | Col13a1    | INSIDE                 | 1.627                                                        | 2.560                          | 905.42             | 2317.85            | 4.164                          | 745.87             | 3106.00            |
| A_68_P23299955 | chr4:129724973-129725017                          | NM_028266:-89     | Col16a1    | PROMOTER               | 1.606                                                        | 3.786                          | 2438.22            | 9230.27            | 6.081                          | 2043.77            | 12427.41           |
| A_68_P23299954 | chr4:129724880-129724924                          | NM_028266:-181    | Col16a1    | PROMOTER               | 1.519                                                        | 3.754                          | 598.62             | 2247.47            | 5.703                          | 528.13             | 3011.74            |
| A_68_P22968875 | chr4:62875286-62875330                            | NM_025685:-1137   | Col27a1    | PROMOTER               | 1.521                                                        | 1.878                          | 674.44             | 1266.91            | 2.857                          | 542.61             | 1550.01            |
| A_68_P23279343 | chr4:125978444-125978488                          | NM_199473:14429   | Col8a2     | INSIDE                 | 1.739                                                        | 1.434                          | 1429.27            | 2050.07            | 2.494                          | 1206.55            | 3008.88            |
| A_68_P21904961 | chr2:180332965-180333009                          | NM_009936:60      | Col9a3     | INSIDE                 | 1.571                                                        | 2.012                          | 1222.98            | 2461.18            | 3.162                          | 972.24             | 3074.01            |
| A_68_P29856055 | chr14:102039383-102039427                         | NM_001033132:284  | Commd6     | INSIDE                 | 1.506                                                        | 3.406                          | 2079.90            | 7084.80            | 5.129                          | 1713.73            | 8790.10            |
| A_68_P25951429 | chr8:72897357-72897401                            | NM_016685:-68     | Comp       | PROMOTER               | 1.610                                                        | 3.467                          | 1420.43            | 4924.30            | 5.580                          | 1152.70            | 6432.41            |
| A_68_P20437267 | chr1:92500071-92500115                            | NM_133805:93      | Cops8      | INSIDE                 | 1.833                                                        | 5.807                          | 2421.48            | 14062.52           | 10.645                         | 1968.22            | 20952.55           |
| A_68_P28047199 | chr11:96723478-96723522                           | NM_019877:12311   | Corp2      | DOWNSTREAM             | 1.769                                                        | 2.368                          | 1123.29            | 2659.94            | 4.189                          | 762.30             | 3193.24            |
| A_68_P24000798 | chr5:114359230-114359275                          | NM_011779:-537    | Coro1c     | PROMOTER               | 1.783                                                        | 5.286                          | 11332.47           | 59901.40           | 9.423                          | 7656.87            | 72153.48           |
| A_68_P24000795 | chr5:114358894-114358938                          | NM_011779:-201    | Coro1c     | PROMOTER               | 1.588                                                        | 2.186                          | 1922.06            | 4201.58            | 3.471                          | 1805.60            | 6267.42            |
| A_68_P26571039 | chr9:62384681-62384725                            | NM_175484:149     | Coro2b     | INSIDE                 | 2.003                                                        | 9.729                          | 15328.83           | 149132.30          | 19.488                         | 12051.50           | 234861.50          |
| A_68_P27937689 | chr11:77275784-77275828                           | NM_139128:-1608   | Coro6      | PROMOTER               | 2.271                                                        | 3.704                          | 1483.14            | 5493.90            | 8.411                          | 1145.14            | 9631.95            |
| A_68_P27937736 | chr11:77281473-77281517                           | NM_139128:4080    | Coro6      | INSIDE                 | 1.638                                                        | 1.704                          | 1225.08            | 2087.69            | 2.791                          | 1035.13            | 2889.33            |
| A_68_P23881743 | chr5:90652818-90652862                            | NM_001033310:181  | Cox18      | INSIDE                 | 1.677                                                        | 4.340                          | 544.98             | 2365.02            | 7.278                          | 501.88             | 3652.77            |
| A_68_P26221734 | chr8:123191897-123191941                          | NM_010926:94      | Cox4nb     | INSIDE                 | 2.130                                                        | 2.268                          | 6911.12            | 15675.39           | 4.830                          | 4809.16            | 23230.14           |
| A_68_P26542219 | chr9:57369547-57369591                            | NM_007747:530     | Cox5a      | INSIDE                 | 1.507                                                        | 1.737                          | 1447.75            | 2514.73            | 2.617                          | 1202.89            | 3148.03            |
| A_68_P23644443 | chr5:43625072-43625116                            | NM_001177379:393  | Cpeb2      | INSIDE                 | 1.713                                                        | 5.653                          | 2539.23            | 14353.61           | 9.685                          | 1936.44            | 18754.98           |
| A_68_P31126789 | chr17:29374780-29374824                           | NM_153166:-67     | Cpne5      | PROMOTER               | 2.036                                                        | 2.750                          | 5129.96            | 14108.92           | 5.599                          | 4116.55            | 23049.87           |
| A_68_P31126791 | chr17:29375001-29375045                           | NM_153166:-287    | Cpne5      | PROMOTER               | 1.712                                                        | 2.642                          | 673.07             | 1778.26            | 4.523                          | 569.70             | 2576.69            |
| A_68_P28688873 | chr12:103213937-103213981                         | NM_016856:-225    | Cpsf2      | PROMOTER               | 1.637                                                        | 2.923                          | 1412.05            | 4127.22            | 4.784                          | 1184.21            | 5665.66            |
| A_68_P28688875 | chr12:103214150-103214194                         | NM_016856:-11     | Cpsf2      | PROMOTER               | 1.736                                                        | 1.425                          | 1111.50            | 1583.51            | 2.474                          | 1079.73            | 2670.99            |
| A_68_P31951139 | chr19:10599956-10600000                           | NM_001164272:245  | Cpsf7      | INSIDE                 | 2.206                                                        | 15.169                         | 6442.48            | 97726.43           | 33.464                         | 3939.70            | 131838.40          |
| A_68_P21103096 | chr2:30271133-30271177                            | NM_007760:114     | Crat       | INSIDE                 | 2.214                                                        | 7.925                          | 3581.49            | 28381.88           | 17.546                         | 2493.99            | 43759.89           |
| A_68_P21425775 | chr2:91815556-91815600                            | NM_011957:48749   | Creb3l1    | DOWNSTREAM             | 1.651                                                        | 2.114                          | 1190.64            | 2516.90            | 3.490                          | 1000.79            | 3492.82            |
| A_68_P24372708 | chr6:37392303-37392347                            | NM_178661:-176    | Creb3l2    | PROMOTER               | 1.764                                                        | 2.324                          | 991.77             | 2304.44            | 4.098                          | 853.65             | 3498.34            |
| A_68_P20796287 | chr1:167694031-167694075                          | NM_011804:142     | Creg1      | INSIDE                 | 1.633                                                        | 2.890                          | 2035.65            | 5883.48            | 4.720                          | 1667.89            | 7872.74            |
| A_68_P25952284 | chr8:73027155-73027199                            | NM_018827:10122   | Crlf1      | INSIDE                 | 1.751                                                        | 3.433                          | 2378.66            | 8165.82            | 6.011                          | 1884.88            | 11330.54           |
| A_68_P23976347 | chr5:109986035-109986079                          | NM_001164735:1956 | Crlf2      | INSIDE                 | 1.690                                                        | 6.297                          | 6501.58            | 40937.80           | 10.638                         | 4205.31            | 44737.50           |
| A_68_P23612481 | chr5:37633390-37633434                            | NM_007765:-3618   | Crrp1      | PROMOTER               | 1.715                                                        | 4.336                          | 649.92             | 2817.97            | 7.435                          | 538.48             | 4003.66            |
| A_68_P23612479 | chr5:37633037-37633081                            | NM_001136058:-260 | Crrp1      | PROMOTER               | 1.705                                                        | 4.128                          | 1558.86            | 6434.45            | 7.038                          | 1230.62            | 8661.63            |
| A_68_P23361673 | chr4:140581289-140581333                          | NM_172122:28266   | Crocc      | INSIDE                 | 1.893                                                        | 5.666                          | 2665.13            | 15100.28           | 10.727                         | 2182.63            | 23412.04           |
| A_68_P23361905 | chr4:140616349-140616393                          | NM_172122:-6794   | Crocc      | PROMOTER               | 1.952                                                        | 1.574                          | 3797.77            | 5976.06            | 3.071                          | 3180.60            | 9768.25            |



| ProbeName      | Target position of probe on CpG island microarray | TargetID           | GeneSymbol    | CpG island Description | Ratio of relative methylation (TiO <sub>2</sub> -NP/Vehicle) | Sham group                     |                    |                    | TiO <sub>2</sub> -H group      |                    |                    |
|----------------|---------------------------------------------------|--------------------|---------------|------------------------|--------------------------------------------------------------|--------------------------------|--------------------|--------------------|--------------------------------|--------------------|--------------------|
|                |                                                   |                    |               |                        |                                                              | Relative methylation (Cy5/Cy3) | Cy3 signal (Input) | Cy5 signal (MeDIP) | Relative methylation (Cy5/Cy3) | Cy3 signal (Input) | Cy5 signal (MeDIP) |
| A_68_P26844412 | chr9:114299556-114299600                          | NM_019922:252      | Crtap         | INSIDE                 | 1.861                                                        | 2.317                          | 304.24             | 704.96             | 4.312                          | 255.06             | 1099.81            |
| A_68_P24850798 | chr6:131338248-131338292                          | NM_011733:198      | Csda          | INSIDE                 | 1.577                                                        | 5.758                          | 1846.89            | 10634.69           | 9.081                          | 1644.68            | 14935.00           |
| A_68_P21832544 | chr2:166731558-166731602                          | NM_023565:-15      | Cse1l         | PROMOTER               | 1.540                                                        | 2.158                          | 2544.10            | 5490.79            | 3.323                          | 1922.64            | 6388.29            |
| A_68_P22408449 | chr3:107563183-107563227                          | NM_001113529:183   | Csf1          | INSIDE                 | 2.457                                                        | 11.554                         | 10695.95           | 123580.20          | 28.391                         | 6189.87            | 175737.30          |
| A_68_P32229410 | chr19:61301151-61301195                           | NM_009970:3149     | Csf2ra        | INSIDE                 | 1.844                                                        | 8.907                          | 12157.54           | 108287.80          | 16.425                         | 7752.53            | 127333.40          |
| A_68_P31758329 | chr18:61715242-61715286                           | NM_146087:29       | Csnk1a1       | INSIDE                 | 1.753                                                        | 2.001                          | 1909.97            | 3822.75            | 3.509                          | 1370.39            | 4808.15            |
| A_68_P26590184 | chr9:65757067-65757111                            | NM_173185:272      | Csnk1g1       | INSIDE                 | 1.657                                                        | 7.170                          | 2904.33            | 20822.79           | 11.882                         | 2120.45            | 25195.40           |
| A_68_P31715736 | chr18:54022224-54022268                           | NM_152809:480      | Csnk1g3       | INSIDE                 | 1.837                                                        | 4.968                          | 577.16             | 2867.29            | 9.127                          | 430.82             | 3931.94            |
| A_68_P21748226 | chr2:152053141-152053185                          | NM_007788:587      | Csnk2a1       | INSIDE                 | 1.652                                                        | 3.954                          | 3066.05            | 12123.17           | 6.533                          | 2172.35            | 14191.76           |
| A_68_P31157711 | chr17:35257720-35257764                           | NM_009975:650      | Csnk2b        | INSIDE                 | 1.595                                                        | 1.882                          | 2747.60            | 5172.15            | 3.002                          | 1920.74            | 5766.73            |
| A_68_P26538932 | chr9:56712960-56713004                            | NM_139001:72       | Cspg4         | INSIDE                 | 1.894                                                        | 4.386                          | 10522.96           | 46156.43           | 8.309                          | 7877.12            | 65451.70           |
| A_68_P26875426 | chr9:119883221-119883265                          | NM_153287:10534    | Csrmp1        | INSIDE                 | 1.624                                                        | 3.499                          | 1072.24            | 3751.45            | 5.682                          | 894.90             | 5084.44            |
| A_68_P31928180 | chr19:5349389-5349433                             | NM_028623:164      | Cst6          | INSIDE                 | 2.051                                                        | 6.540                          | 14012.71           | 91648.82           | 13.412                         | 10206.67           | 136892.60          |
| A_68_P23587982 | chr5:33618039-33618083                            | NM_001198859:-407  | Ctbp1         | PROMOTER               | 1.593                                                        | 2.427                          | 696.54             | 1690.79            | 3.867                          | 582.42             | 2252.40            |
| A_68_P31864634 | chr18:80666119-80666163                           | NM_026295:266      | Ctdp1         | INSIDE                 | 1.911                                                        | 4.138                          | 713.39             | 2952.12            | 7.909                          | 717.95             | 5678.08            |
| A_68_P31838828 | chr18:75857092-75857136                           | NM_201354:236      | Ctif          | INSIDE                 | 2.291                                                        | 9.102                          | 4442.49            | 40434.40           | 20.853                         | 3496.62            | 72913.37           |
| A_68_P24568080 | chr6:77929479-77929523                            | NM_001109764:161   | Ctnna2        | INSIDE                 | 2.885                                                        | 5.838                          | 2978.31            | 17387.62           | 16.841                         | 1751.66            | 29498.86           |
| A_68_P22941962 | chr4:56877715-56877759                            | NM_018761:347      | Ctnnal1       | INSIDE                 | 1.555                                                        | 6.301                          | 881.48             | 5553.93            | 9.797                          | 740.94             | 7259.07            |
| A_68_P26880499 | chr9:120842203-120842247                          | NM_007614:-293     | Ctnnb1        | PROMOTER               | 1.907                                                        | 3.489                          | 2486.61            | 8675.34            | 6.652                          | 1765.98            | 11746.72           |
| A_68_P25616898 | chr8:4259319-4259363                              | NM_183315:-66      | Ctxn1         | PROMOTER               | 2.007                                                        | 4.280                          | 4968.20            | 21264.26           | 8.592                          | 3603.90            | 30964.43           |
| A_68_P27997843 | chr11:87912671-87912715                           | NM_198013:45       | Cuedc1        | INSIDE                 | 1.849                                                        | 4.175                          | 3123.06            | 13039.48           | 7.721                          | 2763.17            | 21333.33           |
| A_68_P27998411 | chr11:88007034-88007078                           | NM_001172099:23990 | Cuedc1        | INSIDE                 | 1.576                                                        | 1.634                          | 744.42             | 1216.08            | 2.574                          | 608.68             | 1566.62            |
| A_68_P24423143 | chr6:47403815-47403859                            | NM_012042:-486     | Cul1          | PROMOTER               | 1.703                                                        | 5.922                          | 1174.27            | 6954.62            | 10.083                         | 914.15             | 9217.76            |
| A_68_P24423149 | chr6:47404611-47404655                            | NM_012042:310      | Cul1          | INSIDE                 | 1.629                                                        | 10.303                         | 2595.13            | 26738.51           | 16.788                         | 1833.59            | 30782.91           |
| A_68_P24423144 | chr6:47403969-47404013                            | NM_012042:-332     | Cul1          | PROMOTER               | 1.552                                                        | 7.853                          | 739.60             | 5808.22            | 12.189                         | 704.37             | 8585.29            |
| A_68_P31208112 | chr17:46787505-46787549                           | NM_025611:240      | Cul7          | INSIDE                 | 1.934                                                        | 4.597                          | 1458.98            | 6707.18            | 8.893                          | 1174.54            | 10445.09           |
| A_68_P32128434 | chr19:43827858-43827902                           | NM_001113562:368   | Cutc          | INSIDE                 | 1.769                                                        | 2.558                          | 2374.32            | 6072.97            | 4.525                          | 1895.91            | 8578.58            |
| A_68_P24048238 | chr5:122499986-122500030                          | NM_007804:-2174    | Cux2          | PROMOTER               | 1.542                                                        | 2.754                          | 614.04             | 1691.04            | 4.248                          | 530.72             | 2254.36            |
| A_68_P29060390 | chr13:56397734-56397778                           | NM_019568:156      | Cxcl14        | INSIDE                 | 3.036                                                        | 3.480                          | 3675.66            | 12793.06           | 10.568                         | 2602.92            | 27507.92           |
| A_68_P27900882 | chr11:70279513-70279557                           | NM_023158:-6048    | Cxcl16        | PROMOTER               | 1.747                                                        | 1.427                          | 1830.22            | 2611.27            | 2.493                          | 1401.27            | 3492.97            |
| A_68_P31620539 | chr18:36020271-36020315                           | NM_133687:30821    | Cxxc5         | INSIDE                 | 1.799                                                        | 4.958                          | 1846.83            | 9156.90            | 8.922                          | 1356.72            | 12104.51           |
| A_68_P31620318 | chr18:35991596-35991640                           | NM_133687:2147     | Cxxc5         | INSIDE                 | 1.724                                                        | 1.975                          | 1603.91            | 3166.95            | 3.404                          | 1180.80            | 4019.63            |
| A_68_P30349758 | chr15:76490310-76490354                           | NM_019396:159      | Cyhr1         | INSIDE                 | 1.928                                                        | 3.640                          | 4666.59            | 16984.62           | 7.018                          | 3324.48            | 23331.03           |
| A_68_P30349739 | chr15:76487469-76487513                           | NM_019396:3001     | Cyhr1         | INSIDE                 | 1.538                                                        | 2.365                          | 2055.01            | 4860.62            | 3.637                          | 1485.47            | 5402.77            |
| A_68_P28727385 | chr12:109572280-109572324                         | NM_010010:-288     | Cyp46a1       | PROMOTER               | 1.561                                                        | 2.654                          | 4354.11            | 11554.80           | 4.141                          | 3150.60            | 13047.81           |
| A_68_P28291023 | chr12:25365989-25366033                           | NM_001004455:650   | Cys1          | INSIDE                 | 1.929                                                        | 13.581                         | 9472.94            | 128648.20          | 26.192                         | 5382.13            | 140967.50          |
| A_68_P24157329 | chr5:144383488-144383532                          | NM_011182:195      | Cyth3         | INSIDE                 | 2.097                                                        | 5.682                          | 2773.18            | 15757.80           | 11.913                         | 2014.79            | 24002.08           |
| A_68_P20472150 | chr1:99557453-99557497                            | NM_133825:1121     | D1Erd622e     | INSIDE                 | 1.578                                                        | 3.205                          | 1890.17            | 6057.91            | 5.058                          | 1626.71            | 8228.26            |
| A_68_P20910364 | chr1:188791866-188791912                          | NM_033077:594      | D1Pas1        | INSIDE                 | 1.629                                                        | 6.821                          | 1369.42            | 9340.44            | 11.108                         | 1236.49            | 13735.20           |
| A_68_P22454038 | chr3:117062948-117062993                          | NM_177664:824      | D3Bwg0562e    | INSIDE                 | 1.550                                                        | 2.469                          | 1291.03            | 3187.15            | 3.827                          | 1048.07            | 4011.15            |
| A_68_P23362371 | chr4:140695718-140695762                          | NM_001025608:-29   | D4Erd22e      | DIVERGENT_PROMOTER     | 1.674                                                        | 1.754                          | 970.90             | 1703.27            | 2.937                          | 788.18             | 2314.72            |
| A_68_P23609090 | chr5:37086922-37086966                            | NM_001081232:264   | D5Erd579e     | INSIDE                 | 1.899                                                        | 4.942                          | 5250.33            | 25945.60           | 9.383                          | 4159.62            | 39028.77           |
| A_68_P22942460 | chr4:56960340-56960384                            | NM_175518:-61      | D730040F13Rik | PROMOTER               | 1.954                                                        | 3.183                          | 1863.90            | 5932.74            | 6.221                          | 1527.94            | 9504.93            |
| A_68_P22942456 | chr4:56959870-56959914                            | NM_175518:409      | D730040F13Rik | INSIDE                 | 1.595                                                        | 6.093                          | 791.80             | 4824.54            | 9.717                          | 707.64             | 6876.09            |
| A_68_P23262658 | chr4:123089142-123089186                          | NM_001167918:-10   | D830031N03Rik | PROMOTER               | 2.296                                                        | 9.442                          | 1728.54            | 16320.16           | 21.680                         | 1397.75            | 30303.05           |
| A_68_P23262662 | chr4:123089650-123089695                          | NM_001167918:-518  | D830031N03Rik | PROMOTER               | 1.766                                                        | 3.937                          | 2775.83            | 10928.71           | 6.954                          | 2219.30            | 15433.61           |
| A_68_P25784087 | chr8:37210103-37210147                            | NM_172911:52243    | D8Erd82e      | INSIDE                 | 1.607                                                        | 4.243                          | 5872.86            | 24917.49           | 6.816                          | 4103.14            | 27967.73           |

| ProbeName      | Target position of probe on CpG island microarray | TargetID           | GeneSymbol    | CpG island Description | Ratio of relative methylation (TiO <sub>2</sub> -NP/Vehicle) | Sham group                     |                    |                    | TiO <sub>2</sub> -H group      |                    |                    |
|----------------|---------------------------------------------------|--------------------|---------------|------------------------|--------------------------------------------------------------|--------------------------------|--------------------|--------------------|--------------------------------|--------------------|--------------------|
|                |                                                   |                    |               |                        |                                                              | Relative methylation (Cy5/Cy3) | Cy3 signal (Input) | Cy5 signal (MeDIP) | Relative methylation (Cy5/Cy3) | Cy3 signal (Input) | Cy5 signal (MeDIP) |
| A_68_P22288626 | chr3:83844024-83844068                            | NM_172681:37       | D930015E06Rik | INSIDE                 | 1.520                                                        | 3.459                          | 496.73             | 1718.18            | 5.259                          | 409.31             | 2152.57            |
| A_68_P28528483 | chr12:72932910-72932958                           | NM_026102:870      | Daam1         | INSIDE                 | 1.777                                                        | 7.692                          | 781.12             | 6008.10            | 13.668                         | 536.03             | 7326.51            |
| A_68_P21134366 | chr2:35438211-35438255                            | NM_001114125:24255 | Dab2ip        | INSIDE                 | 1.951                                                        | 9.744                          | 1321.86            | 12879.94           | 19.014                         | 1073.76            | 20416.14           |
| A_68_P28525473 | chr12:72410602-72410646                           | NM_001190466:-246  | Dact1         | PROMOTER               | 2.051                                                        | 4.733                          | 4828.66            | 22854.24           | 9.709                          | 3756.42            | 36472.19           |
| A_68_P28525474 | chr12:72410830-72410874                           | NM_001190466:-18   | Dact1         | PROMOTER               | 1.539                                                        | 2.050                          | 5746.86            | 11781.79           | 3.155                          | 4667.44            | 14727.36           |
| A_68_P30113003 | chr15:31154105-31154149                           | NM_146057:-13      | Dap           | PROMOTER               | 1.667                                                        | 3.313                          | 3856.43            | 12776.00           | 5.524                          | 3116.01            | 17212.56           |
| A_68_P27282058 | chr10:79727411-79727455                           | NM_001122604:-303  | Dazap1        | DIVERGENT_PROMOTER     | 1.571                                                        | 1.727                          | 1340.24            | 2314.13            | 2.713                          | 1046.16            | 2838.21            |
| A_68_P29055349 | chr13:55589582-55589626                           | NM_001177371:-167  | Dbn1          | PROMOTER               | 2.120                                                        | 8.125                          | 3720.33            | 30227.89           | 17.225                         | 2832.48            | 48789.15           |
| A_68_P29055348 | chr13:55589381-55589425                           | NM_001177371:35    | Dbn1          | INSIDE                 | 1.689                                                        | 2.635                          | 18468.36           | 48663.72           | 4.451                          | 14895.89           | 66305.82           |
| A_68_P27564951 | chr11:5688365-5688409                             | NM_001146308:-99   | Dbn1          | PROMOTER               | 2.322                                                        | 6.341                          | 2538.53            | 16095.66           | 14.726                         | 1987.15            | 29262.25           |
| A_68_P22882382 | chr4:45355016-45355060                            | NM_153167:66       | Dcaf10        | INSIDE                 | 2.015                                                        | 1.758                          | 1505.23            | 2646.64            | 3.543                          | 1371.16            | 4857.88            |
| A_68_P22861615 | chr4:41261631-41261675                            | NM_026893:282      | Deaf12        | INSIDE                 | 2.213                                                        | 9.114                          | 4804.62            | 43790.81           | 20.168                         | 3504.05            | 70669.71           |
| A_68_P32351252 | chrX:42143188-42143232                            | NM_001190718:128   | Deaf12l1      | INSIDE                 | 2.865                                                        | 7.296                          | 3767.38            | 27487.72           | 20.901                         | 2077.17            | 43415.76           |
| A_68_P32351254 | chrX:42143356-42143400                            | NM_178739:-4       | Deaf12l1      | PROMOTER               | 1.772                                                        | 2.845                          | 4125.07            | 11736.55           | 5.042                          | 2258.89            | 11388.94           |
| A_68_P28082865 | chr11:102878532-102878576                         | NM_026551:-93      | Deakd         | PROMOTER               | 1.560                                                        | 5.102                          | 5424.26            | 27675.60           | 7.959                          | 4348.58            | 34611.79           |
| A_68_P30791337 | chr16:58408386-58408430                           | NM_028523:-239     | Dcblid2       | PROMOTER               | 2.089                                                        | 3.420                          | 3208.27            | 10970.76           | 7.142                          | 2683.72            | 19168.06           |
| A_68_P22388169 | chr3:103613288-103613332                          | NM_001025312:0     | Dclre1b       | INSIDE                 | 1.657                                                        | 8.165                          | 1708.03            | 13946.79           | 13.526                         | 1349.17            | 18249.39           |
| A_68_P24791602 | chr6:119125266-119125312                          | NM_001033379:18    | Dep1b         | INSIDE                 | 1.522                                                        | 6.481                          | 3512.61            | 22766.90           | 9.865                          | 2669.19            | 26332.06           |
| A_68_P25845477 | chr8:49195740-49195784                            | NM_001161515:396   | Detd          | INSIDE                 | 3.295                                                        | 10.942                         | 2629.12            | 28768.68           | 36.052                         | 1918.64            | 69170.72           |
| A_68_P27534905 | chr10:126703422-126703466                         | NM_001190453:127   | Dctn2         | INSIDE                 | 1.938                                                        | 3.315                          | 3380.69            | 11207.19           | 6.425                          | 2486.22            | 15973.56           |
| A_68_P25772218 | chr8:35171274-35171318                            | NM_011722:269      | Detn6         | INSIDE                 | 1.621                                                        | 1.979                          | 1786.21            | 3534.22            | 3.208                          | 1530.23            | 4909.07            |
| A_68_P25504835 | chr7:134404064-134404108                          | NM_023203:95       | Dctpp1        | INSIDE                 | 1.581                                                        | 2.655                          | 4740.09            | 12584.03           | 4.197                          | 3408.48            | 14305.16           |
| A_68_P23797913 | chr5:73883146-73883190                            | NM_001190733:904   | Deun1d4       | INSIDE                 | 1.826                                                        | 10.139                         | 17685.04           | 179306.30          | 18.515                         | 10597.88           | 196224.10          |
| A_68_P23797912 | chr5:73883055-73883099                            | NM_001190733:812   | Deun1d4       | INSIDE                 | 1.573                                                        | 9.002                          | 22377.90           | 201451.70          | 14.162                         | 12948.66           | 183376.70          |
| A_68_P22610589 | chr3:145421770-145421814                          | NM_026993:137      | Ddah1         | INSIDE                 | 1.654                                                        | 3.326                          | 2381.64            | 7920.16            | 5.501                          | 1933.39            | 10634.74           |
| A_68_P29571979 | chr14:46277367-46277411                           | NM_001039106:430   | Ddhd1         | INSIDE                 | 1.672                                                        | 3.868                          | 8539.33            | 33027.56           | 6.465                          | 7021.19            | 45391.26           |
| A_68_P23365645 | chr4:141279495-141279539                          | NM_001017966:-182  | Ddi2          | PROMOTER               | 1.778                                                        | 2.405                          | 1101.33            | 2649.11            | 4.276                          | 961.04             | 4109.56            |
| A_68_P30476596 | chr15:98637471-98637515                           | NM_001013741:864   | Ddn           | INSIDE                 | 1.579                                                        | 3.302                          | 1653.03            | 5459.03            | 5.215                          | 1322.62            | 6897.74            |
| A_68_P26166134 | chr8:113551628-113551672                          | NM_001190800:20    | Ddx19b        | INSIDE                 | 1.604                                                        | 2.542                          | 2363.69            | 6008.76            | 4.078                          | 1826.18            | 7447.29            |
| A_68_P22398585 | chr3:105490135-105490179                          | NM_017397:333      | Ddx20         | INSIDE                 | 1.879                                                        | 2.525                          | 1089.30            | 2750.84            | 4.746                          | 942.09             | 4471.30            |
| A_68_P32395905 | chrX:53709083-53709127                            | NM_172779:1089     | Ddx26b        | INSIDE                 | 1.530                                                        | 1.452                          | 5384.84            | 7816.63            | 2.221                          | 2264.74            | 5029.57            |
| A_68_P32265729 | chrX:12858825-12858869                            | NM_010028:699      | Ddx3x         | INSIDE                 | 2.282                                                        | 1.824                          | 882.91             | 1610.03            | 4.162                          | 582.92             | 2425.88            |
| A_68_P32265732 | chrX:12859122-12859166                            | NM_010028:997      | Ddx3x         | INSIDE                 | 1.642                                                        | 2.048                          | 627.54             | 1285.32            | 3.363                          | 607.86             | 2043.95            |
| A_68_P32265730 | chrX:12858920-12858964                            | NM_010028:795      | Ddx3x         | INSIDE                 | 2.217                                                        | 1.889                          | 385.98             | 729.24             | 4.188                          | 219.21             | 918.16             |
| A_68_P26659378 | chr9:78243891-78243935                            | NM_001191044:329   | Ddx43         | INSIDE                 | 1.647                                                        | 3.794                          | 1438.91            | 5459.07            | 6.249                          | 1300.98            | 8129.60            |
| A_68_P28103521 | chr11:106649919-106649963                         | NM_007840:-132     | Ddx5          | DIVERGENT_PROMOTER     | 2.625                                                        | 6.666                          | 17960.68           | 119723.90          | 17.499                         | 11517.85           | 201546.70          |
| A_68_P20645803 | chr1:138311898-138311942                          | NM_026500:73       | Ddx59         | INSIDE                 | 2.215                                                        | 2.243                          | 339.36             | 761.23             | 4.969                          | 308.46             | 1532.86            |
| A_68_P26468513 | chr9:44413201-44413245                            | NM_001110826:248   | Ddx6          | INSIDE                 | 2.063                                                        | 4.714                          | 9476.98            | 44677.44           | 9.726                          | 6618.62            | 64370.16           |
| A_68_P22752471 | chr4:15872402-15872446                            | NM_026172:230      | Decr1         | INSIDE                 | 1.727                                                        | 2.505                          | 2768.71            | 6935.72            | 4.326                          | 2314.43            | 10012.17           |
| A_68_P22752472 | chr4:15872547-15872591                            | NM_026172:86       | Decr1         | INSIDE                 | 1.699                                                        | 5.267                          | 2508.55            | 13212.65           | 8.947                          | 2094.87            | 18743.45           |
| A_68_P25009065 | chr7:26004933-26004977                            | NM_207677:-76      | Dedd2         | DIVERGENT_PROMOTER     | 2.316                                                        | 2.652                          | 8195.44            | 21737.08           | 6.143                          | 5505.81            | 33821.86           |
| A_68_P20885895 | chr1:184212870-184212914                          | NM_007853:-2       | Degs1         | PROMOTER               | 1.589                                                        | 9.939                          | 456.85             | 4540.71            | 15.794                         | 377.16             | 5956.78            |
| A_68_P20885892 | chr1:184212460-184212504                          | NM_007853:408      | Degs1         | INSIDE                 | 1.510                                                        | 1.720                          | 462.28             | 795.14             | 2.597                          | 412.83             | 1072.19            |
| A_68_P29011719 | chr13:47201171-47201215                           | NM_025900:397      | Dek           | INSIDE                 | 1.738                                                        | 1.560                          | 990.11             | 1544.24            | 2.711                          | 764.35             | 2072.05            |
| A_68_P25410984 | chr7:117103504-117103548                          | NM_021494:410      | Dennd5a       | INSIDE                 | 1.627                                                        | 1.745                          | 1202.04            | 2097.07            | 2.838                          | 950.80             | 2698.44            |
| A_68_P23585886 | chr5:33206293-33206337                            | NM_177786:-55      | Depdc5        | DIVERGENT_PROMOTER     | 1.540                                                        | 1.961                          | 1701.05            | 3335.59            | 3.019                          | 1486.86            | 4489.25            |
| A_68_P30244836 | chr15:57723668-57723712                           | NM_024207:283      | Derl1         | INSIDE                 | 2.280                                                        | 1.624                          | 1458.51            | 2367.91            | 3.701                          | 1125.77            | 4166.54            |

| ProbeName      | Target position of probe on CpG island microarray | TargetID           | GeneSymbol | CpG island Description | Ratio of relative methylation (TiO <sub>2</sub> -NP/Vehicle) | Sham group                     |                    |                    | TiO <sub>2</sub> -H group      |                    |                    |
|----------------|---------------------------------------------------|--------------------|------------|------------------------|--------------------------------------------------------------|--------------------------------|--------------------|--------------------|--------------------------------|--------------------|--------------------|
|                |                                                   |                    |            |                        |                                                              | Relative methylation (Cy5/Cy3) | Cy3 signal (Input) | Cy5 signal (MeDIP) | Relative methylation (Cy5/Cy3) | Cy3 signal (Input) | Cy5 signal (MeDIP) |
| A_68_P30599077 | chr16:22657267-22657311                           | NM_138650:16       | Dgkg       | INSIDE                 | 1.502                                                        | 1.609                          | 1659.05            | 2669.27            | 2.416                          | 1302.66            | 3147.24            |
| A_68_P24371747 | chr6:37249971-37250015                            | NM_001081206:-16   | Dgki       | PROMOTER               | 1.691                                                        | 3.057                          | 2279.23            | 6968.62            | 5.169                          | 1966.19            | 10162.98           |
| A_68_P23185134 | chr4:106234075-106234119                          | NM_053272:454      | Dher24     | INSIDE                 | 1.618                                                        | 1.954                          | 6180.72            | 12074.38           | 3.161                          | 4658.67            | 14725.56           |
| A_68_P23320471 | chr4:133556862-133556906                          | NM_026144:-105     | Dhdds      | PROMOTER               | 1.911                                                        | 6.695                          | 713.05             | 4773.77            | 12.792                         | 604.67             | 7734.84            |
| A_68_P33007796 | chr4_random:129608-129112                         | NM_001033326:19289 | Dhrsx      | INSIDE                 | 2.214                                                        | 6.689                          | 9324.57            | 62374.43           | 14.813                         | 5853.14            | 86702.44           |
| A_68_P33007786 | chr4_random:127770-127814                         | NM_001033326:17991 | Dhrsx      | INSIDE                 | 2.030                                                        | 7.054                          | 14713.05           | 103787.70          | 14.321                         | 9700.82            | 138923.80          |
| A_68_P33007785 | chr4_random:127689-127733                         | NM_001033326:17909 | Dhrsx      | INSIDE                 | 2.029                                                        | 9.778                          | 14226.98           | 139116.50          | 19.840                         | 9243.32            | 183387.90          |
| A_68_P33008826 | chr4_random:110027-110071                         | NM_001033326:247   | Dhrsx      | INSIDE                 | 1.989                                                        | 5.009                          | 2018.28            | 10110.10           | 9.965                          | 1605.78            | 16000.96           |
| A_68_P33007798 | chr4_random:129389-129433                         | NM_001033326:19609 | Dhrsx      | INSIDE                 | 1.744                                                        | 5.327                          | 2192.86            | 11680.33           | 9.290                          | 1601.36            | 14876.20           |
| A_68_P33007795 | chr4_random:128995-129039                         | NM_001033326:19215 | Dhrsx      | INSIDE                 | 1.665                                                        | 7.586                          | 4871.29            | 36951.56           | 12.632                         | 3359.62            | 42438.83           |
| A_68_P27903827 | chr11:70817840-70817884                           | NM_178367:72       | Dhx33      | INSIDE                 | 1.671                                                        | 2.399                          | 725.62             | 1740.90            | 4.009                          | 589.10             | 2361.84            |
| A_68_P24980375 | chr7:16807208-16807254                            | NM_027883:151      | Dhx34      | INSIDE                 | 1.706                                                        | 2.067                          | 963.48             | 1991.87            | 3.527                          | 747.64             | 2637.04            |
| A_68_P20947409 | chr1:194956122-194956166                          | NM_145415:301      | Diexf      | INSIDE                 | 1.547                                                        | 1.635                          | 441.40             | 721.86             | 2.530                          | 342.33             | 866.11             |
| A_68_P30672037 | chr16:35769289-35769333                           | NM_153550:132      | Dir2       | INSIDE                 | 1.707                                                        | 3.802                          | 1819.91            | 6918.94            | 6.491                          | 1445.82            | 9384.94            |
| A_68_P26249219 | chr8:127578258-127578302                          | NM_174853:186      | Disc1      | INSIDE                 | 1.745                                                        | 4.120                          | 16321.94           | 67241.74           | 7.190                          | 12123.42           | 87166.19           |
| A_68_P26505081 | chr9:50506728-50506772                            | NM_178118:29339    | Dixdc1     | INSIDE                 | 1.765                                                        | 1.817                          | 1669.25            | 3032.53            | 3.207                          | 1162.67            | 3728.34            |
| A_68_P26504861 | chr9:50467491-50467535                            | NM_145614:373      | Dlat       | INSIDE                 | 1.775                                                        | 3.414                          | 2240.05            | 7647.12            | 6.059                          | 1937.02            | 11735.53           |
| A_68_P28330749 | chr12:32035950-32035994                           | NM_007861:330      | Dld        | INSIDE                 | 1.653                                                        | 4.600                          | 1536.04            | 7066.43            | 7.607                          | 1242.80            | 9453.52            |
| A_68_P29651397 | chr14:62301793-62301837                           | NR_028264:-604     | Dleu2      | PROMOTER               | 2.086                                                        | 5.959                          | 1659.98            | 9891.50            | 12.430                         | 1475.76            | 18342.94           |
| A_68_P29651430 | chr14:62305865-62305909                           | NR_028264:-4676    | Dleu2      | PROMOTER               | 1.558                                                        | 4.143                          | 1151.74            | 4771.58            | 6.455                          | 932.74             | 6020.70            |
| A_68_P29651385 | chr14:62300358-62300402                           | NR_028264:830      | Dleu2      | INSIDE                 | 1.526                                                        | 3.449                          | 4014.63            | 13847.19           | 5.263                          | 3245.48            | 17082.07           |
| A_68_P29470473 | chr14:25064406-25064450                           | NM_001163513:714   | Dlg5       | INSIDE                 | 1.884                                                        | 21.987                         | 778.65             | 17120.00           | 41.423                         | 520.80             | 21572.99           |
| A_68_P29470478 | chr14:25065176-25065220                           | NM_001163513:-56   | Dlg5       | PROMOTER               | 1.584                                                        | 2.924                          | 782.41             | 2287.43            | 4.630                          | 663.38             | 3071.49            |
| A_68_P31330059 | chr17:71007053-71007097                           | NM_001128181:95988 | Dlgap1     | INSIDE                 | 1.620                                                        | 13.447                         | 4003.88            | 53839.91           | 21.787                         | 2580.13            | 56214.38           |
| A_68_P25672261 | chr8:14096967-14097011                            | NM_001145965:1114  | Dlgap2     | INSIDE                 | 1.777                                                        | 3.076                          | 3873.43            | 11915.11           | 5.468                          | 2879.39            | 15743.16           |
| A_68_P28732711 | chr12:110692025-110692069                         | NM_001190703:382   | Dlk1       | INSIDE                 | 1.892                                                        | 2.773                          | 11271.12           | 31256.75           | 5.247                          | 7974.42            | 41839.52           |
| A_68_P31065266 | chr17:15513473-15513517                           | NM_007865:-707     | Dll1       | PROMOTER               | 1.612                                                        | 5.376                          | 1640.73            | 8821.10            | 8.668                          | 1157.08            | 10028.99           |
| A_68_P25021007 | chr7:29079751-29079795                            | NM_007866:7032     | Dll3       | INSIDE                 | 1.529                                                        | 4.149                          | 1259.27            | 5225.23            | 6.346                          | 1111.25            | 7052.15            |
| A_68_P28036776 | chr11:94982434-94982478                           | NM_010055:1026     | Dlx3       | INSIDE                 | 2.017                                                        | 2.367                          | 3116.23            | 7376.19            | 4.774                          | 2074.45            | 9904.28            |
| A_68_P24218861 | chr6:6829299-6829343                              | NM_010056:2748     | Dlx5       | INSIDE                 | 1.699                                                        | 2.436                          | 1752.76            | 4269.76            | 4.138                          | 1353.69            | 5601.47            |
| A_68_P23226835 | chr4:115616658-115616702                          | NM_001025567:-4149 | Dmbx1      | PROMOTER               | 1.610                                                        | 3.342                          | 3326.32            | 11115.32           | 5.381                          | 2563.60            | 13794.61           |
| A_68_P32031149 | chr19:25746643-25746687                           | NM_145831:-236     | Dmrt2      | PROMOTER               | 2.234                                                        | 3.449                          | 1352.47            | 4664.11            | 7.702                          | 1112.55            | 8569.35            |
| A_68_P23203724 | chr4:109649844-109649888                          | NM_172296:-763     | Dmrt2      | PROMOTER               | 3.082                                                        | 29.984                         | 17420.38           | 522325.10          | 92.404                         | 8951.32            | 827137.40          |
| A_68_P23203774 | chr4:109655335-109655379                          | NM_172296:4727     | Dmrt2      | INSIDE                 | 1.779                                                        | 4.383                          | 3173.67            | 13908.76           | 7.797                          | 2499.63            | 19489.75           |
| A_68_P23203786 | chr4:109656795-109656839                          | NM_172296:6187     | Dmrt2      | DOWNSTREAM             | 1.621                                                        | 8.757                          | 7571.12            | 66301.58           | 14.193                         | 5316.97            | 75464.36           |
| A_68_P26526109 | chr9:54349056-54349100                            | NM_172771:355      | Dmxl2      | INSIDE                 | 1.758                                                        | 3.148                          | 2854.95            | 8988.13            | 5.534                          | 2120.01            | 11732.20           |
| A_68_P26015683 | chr8:86132210-86132254                            | NM_018808:159      | Dnajb1     | INSIDE                 | 2.012                                                        | 3.343                          | 2738.47            | 9154.51            | 6.726                          | 2170.21            | 14596.54           |
| A_68_P20422167 | chr1:90102351-90102395                            | NM_008299:-49      | Dnajb3     | DIVERGENT_PROMOTER     | 1.628                                                        | 6.145                          | 1938.67            | 11913.38           | 10.006                         | 1545.92            | 15468.64           |
| A_68_P28396964 | chr12:45311296-45311340                           | NM_013760:-263     | Dnajb9     | PROMOTER               | 1.813                                                        | 1.965                          | 1056.58            | 2076.00            | 3.562                          | 892.34             | 3178.07            |
| A_68_P27543292 | chr10:128242453-128242497                         | NM_028873:-257     | Dnajc14    | DIVERGENT_PROMOTER     | 1.631                                                        | 2.164                          | 846.84             | 1832.34            | 3.529                          | 769.79             | 2716.63            |
| A_68_P30010737 | chr15:10399801-10399845                           | NM_030046:449      | Dnajc21    | INSIDE                 | 1.599                                                        | 4.759                          | 1474.51            | 7017.39            | 7.611                          | 1290.18            | 9819.95            |
| A_68_P30478229 | chr15:98928779-98928823                           | NM_176835:-1114    | Dnajc22    | PROMOTER               | 2.194                                                        | 8.321                          | 7380.07            | 61409.06           | 18.254                         | 5468.03            | 99815.07           |
| A_68_P30478193 | chr15:98924227-98924271                           | NM_176835:-5666    | Dnajc22    | DIVERGENT_PROMOTER     | 1.656                                                        | 4.130                          | 5541.49            | 22886.39           | 6.838                          | 4719.82            | 32273.13           |
| A_68_P26022583 | chr8:87432507-87432551                            | NM_010062:6        | Dnase2a    | INSIDE                 | 2.009                                                        | 11.553                         | 2603.56            | 30078.45           | 23.214                         | 1599.71            | 37136.06           |
| A_68_P20405120 | chr1:84692097-84692141                            | NM_152915:678      | Dner       | INSIDE                 | 1.817                                                        | 2.089                          | 1042.51            | 2177.44            | 3.794                          | 810.47             | 3075.12            |
| A_68_P20778066 | chr1:164408081-164408125                          | NM_001038619:59    | Dnm3       | INSIDE                 | 1.611                                                        | 2.867                          | 1051.30            | 3013.75            | 4.617                          | 792.73             | 3660.19            |
| A_68_P20778063 | chr1:164407783-164407827                          | NM_001038619:357   | Dnm3       | INSIDE                 | 1.503                                                        | 2.197                          | 2396.10            | 5263.29            | 3.302                          | 1800.71            | 5945.11            |

| ProbeName      | Target position of probe on CpG island microarray | TargetID            | GeneSymbol    | CpG island Description | Ratio of relative methylation (TiO <sub>2</sub> -NP/Vehicle) | Sham group                     |                    |                    | TiO <sub>2</sub> -H group      |                    |                    |
|----------------|---------------------------------------------------|---------------------|---------------|------------------------|--------------------------------------------------------------|--------------------------------|--------------------|--------------------|--------------------------------|--------------------|--------------------|
|                |                                                   |                     |               |                        |                                                              | Relative methylation (Cy5/Cy3) | Cy3 signal (Input) | Cy5 signal (MeDIP) | Relative methylation (Cy5/Cy3) | Cy3 signal (Input) | Cy5 signal (MeDIP) |
| A_68_P21819501 | chr2:164571271-164571315                          | NM_133763:-222      | Dnntp1        | DIVERGENT_PROMOTER     | 1.520                                                        | 2.327                          | 7413.05            | 17246.82           | 3.535                          | 5386.08            | 19041.21           |
| A_68_P27928203 | chr11:75608556-75608600                           | NM_007873:981       | Doc2b         | INSIDE                 | 3.043                                                        | 7.601                          | 425.29             | 3232.70            | 23.131                         | 319.99             | 7401.59            |
| A_68_P32315765 | chrX:33428989-33429033                            | NM_001009947:184    | Dock11        | INSIDE                 | 1.636                                                        | 4.768                          | 664.47             | 3167.92            | 7.801                          | 455.12             | 3550.48            |
| A_68_P24590984 | chr6:82983529-82983573                            | NM_010070:-85       | Dok1          | DIVERGENT_PROMOTER     | 2.352                                                        | 3.562                          | 1137.34            | 4051.68            | 8.379                          | 847.92             | 7104.88            |
| A_68_P21102300 | chr2:30141879-30141923                            | NM_177648:-26       | Dolk          | DIVERGENT_PROMOTER     | 1.913                                                        | 2.441                          | 2439.73            | 5955.30            | 4.670                          | 1879.60            | 8778.17            |
| A_68_P21102918 | chr2:30248319-30248363                            | NM_020329:405       | Dolpp1        | INSIDE                 | 1.735                                                        | 4.161                          | 1997.38            | 8310.37            | 7.217                          | 1574.57            | 11363.04           |
| A_68_P27285229 | chr10:80217921-80217965                           | NM_199322:-8        | Dot11         | PROMOTER               | 1.659                                                        | 2.909                          | 2296.28            | 6680.22            | 4.825                          | 1829.74            | 8828.72            |
| A_68_P21840215 | chr2:168055402-168055451                          | NM_010072:453       | Dpm1          | INSIDE                 | 1.625                                                        | 2.341                          | 439.97             | 1029.83            | 3.804                          | 363.32             | 1382.21            |
| A_68_P31350938 | chr17:74715809-74715853                           | NM_001146223:-57    | Dpy30         | PROMOTER               | 1.871                                                        | 3.740                          | 704.95             | 2636.74            | 7.000                          | 589.60             | 4127.01            |
| A_68_P31928602 | chr19:5424535-5424579                             | NM_024176:360       | Drap1         | INSIDE                 | 1.772                                                        | 3.070                          | 6270.42            | 19247.44           | 5.439                          | 4578.67            | 24902.28           |
| A_68_P29047192 | chr13:54150550-54150594                           | NM_010076:455       | Drd1a         | INSIDE                 | 1.729                                                        | 3.605                          | 1644.59            | 5928.09            | 6.233                          | 1271.41            | 7925.09            |
| A_68_P30997386 | chr16:97392403-97392447                           | NM_031174:-82       | Dscam         | PROMOTER               | 1.644                                                        | 1.595                          | 480.90             | 766.97             | 2.622                          | 482.13             | 1264.18            |
| A_68_P21704233 | chr2:143740849-143740894                          | NM_019771:-195      | Dstn          | PROMOTER               | 1.592                                                        | 3.379                          | 3450.55            | 11659.34           | 5.380                          | 2818.76            | 15163.67           |
| A_68_P20621314 | chr1:134314077-134314121                          | NM_172516:69        | Dstyk         | INSIDE                 | 2.025                                                        | 8.533                          | 658.52             | 5619.20            | 17.275                         | 566.30             | 9782.98            |
| A_68_P28195719 | chr12:3572230-3572274                             | NM_001162465:-138   | Dtnb          | PROMOTER               | 1.927                                                        | 2.025                          | 1262.01            | 2555.32            | 3.901                          | 913.73             | 3564.66            |
| A_68_P31258211 | chr17:56901482-56901526                           | NM_144858:-2669     | Dus3l         | DIVERGENT_PROMOTER     | 1.532                                                        | 1.538                          | 1244.70            | 1913.87            | 2.355                          | 1027.37            | 2419.82            |
| A_68_P24607367 | chr6:85911667-85911711                            | NM_028099:-27       | Dusp11        | PROMOTER               | 1.716                                                        | 2.947                          | 1375.74            | 4054.99            | 5.058                          | 1093.69            | 5531.42            |
| A_68_P27975235 | chr11:83881690-83881734                           | NM_019819:147       | Dusp14        | INSIDE                 | 1.803                                                        | 2.054                          | 1290.16            | 2649.80            | 3.702                          | 1035.86            | 3834.90            |
| A_68_P20834309 | chr1:174562662-174562706                          | NM_026725:421       | Dusp23        | INSIDE                 | 1.704                                                        | 4.278                          | 19244.57           | 82328.57           | 7.290                          | 13306.05           | 97004.34           |
| A_68_P26802905 | chr9:106270040-106270084                          | NM_153459:-900      | Dusp7         | PROMOTER               | 1.647                                                        | 5.814                          | 8987.36            | 52249.22           | 9.574                          | 6248.62            | 59827.29           |
| A_68_P32463876 | chrX:70882705-70882749                            | NM_029352:-2053     | Dusp9         | PROMOTER               | 2.058                                                        | 3.948                          | 1322.13            | 5219.25            | 8.125                          | 759.53             | 6171.13            |
| A_68_P32463877 | chrX:70882835-70882879                            | NM_029352:-1923     | Dusp9         | PROMOTER               | 1.602                                                        | 2.572                          | 789.86             | 2031.39            | 4.119                          | 437.53             | 1802.33            |
| A_68_P30588038 | chr16:20531403-20531447                           | NM_007889:14288     | Dvl3          | INSIDE                 | 1.524                                                        | 3.268                          | 6445.03            | 21060.16           | 4.980                          | 4893.53            | 24368.66           |
| A_68_P24213704 | chr6:5955887-5955931                              | NM_001191023:280270 | Dync1i1       | INSIDE                 | 1.827                                                        | 3.203                          | 1241.53            | 3976.49            | 5.851                          | 992.91             | 5809.75            |
| A_68_P26128587 | chr8:106966661-106966705                          | NM_001013380:265    | Dync1i2       | INSIDE                 | 1.515                                                        | 3.010                          | 3069.91            | 9241.24            | 4.561                          | 2459.41            | 11216.76           |
| A_68_P24008929 | chr5:115751222-115751266                          | NM_019682:-245      | Dynll1        | PROMOTER               | 1.789                                                        | 4.209                          | 2244.59            | 9447.12            | 7.528                          | 1866.35            | 14049.56           |
| A_68_P27997247 | chr11:87800951-87800995                           | NM_001168472:-885   | Dynll2        | PROMOTER               | 1.522                                                        | 2.430                          | 1692.09            | 4111.94            | 3.698                          | 1379.73            | 5101.95            |
| A_68_P25020574 | chr7:28965243-28965287                            | NM_010092:752       | Dyrk1b        | INSIDE                 | 1.615                                                        | 3.240                          | 2559.08            | 8290.75            | 5.233                          | 2122.57            | 11107.96           |
| A_68_P20613818 | chr1:133034787-133034831                          | NM_145508:3         | Dyrk3         | INSIDE                 | 1.595                                                        | 2.262                          | 671.25             | 1518.37            | 3.608                          | 591.10             | 2132.62            |
| A_68_P30743456 | chr16:48994162-48994206                           | NM_001110017:41     | Dzip3         | INSIDE                 | 1.523                                                        | 3.027                          | 2735.09            | 8279.27            | 4.610                          | 2240.86            | 10331.14           |
| A_68_P28051732 | chr11:97489553-97489597                           | NM_175332:1456      | E130012A19Rik | INSIDE                 | 2.375                                                        | 10.917                         | 6860.96            | 74899.38           | 25.922                         | 4341.43            | 112540.60          |
| A_68_P27080340 | chr10:39451597-39451641                           | NR_038037:195       | E130307A14Rik | INSIDE                 | 1.543                                                        | 1.585                          | 1856.03            | 2942.01            | 2.446                          | 1386.50            | 3391.38            |
| A_68_P27921611 | chr11:74451961-74452005                           | NM_001013784:18876  | E130309D14Rik | INSIDE                 | 2.250                                                        | 5.916                          | 3541.95            | 20954.34           | 13.311                         | 2760.39            | 36744.42           |
| A_68_P27921465 | chr11:74424335-74424379                           | NM_001013784:-8750  | E130309D14Rik | PROMOTER               | 1.826                                                        | 5.392                          | 1636.03            | 8821.58            | 9.847                          | 1314.62            | 12944.86           |
| A_68_P27921510 | chr11:74433466-74433510                           | NM_001013784:382    | E130309D14Rik | INSIDE                 | 1.533                                                        | 8.832                          | 2611.07            | 23060.27           | 13.542                         | 1959.59            | 26536.29           |
| A_68_P27921508 | chr11:74433189-74433233                           | NM_001013784:104    | E130309D14Rik | INSIDE                 | 1.533                                                        | 3.394                          | 3585.16            | 12167.32           | 5.202                          | 3056.19            | 15899.69           |
| A_68_P22903296 | chr4:49072520-49072564                            | NM_178756:209       | E130309F12Rik | INSIDE                 | 1.655                                                        | 1.726                          | 2128.61            | 3672.93            | 2.856                          | 1666.20            | 4758.16            |
| A_68_P27279294 | chr10:79318023-79318067                           | NR_029447:-328      | E130317F20Rik | PROMOTER               | 2.202                                                        | 5.706                          | 1545.56            | 8818.27            | 12.562                         | 1215.69            | 15271.43           |
| A_68_P28266974 | chr12:16817834-16817878                           | NM_033270:86        | E2f6          | INSIDE                 | 1.727                                                        | 3.658                          | 1329.30            | 4862.99            | 6.319                          | 1114.54            | 7042.68            |
| A_68_P27445213 | chr10:110182319-110182363                         | NM_178609:-180      | E2f7          | PROMOTER               | 1.748                                                        | 4.159                          | 772.89             | 3214.54            | 7.272                          | 770.36             | 5602.23            |
| A_68_P25108786 | chr7:56137106-56137150                            | NM_001013368:-717   | E2f8          | PROMOTER               | 1.688                                                        | 4.136                          | 2662.40            | 11010.37           | 6.982                          | 2311.18            | 16136.32           |
| A_68_P24388784 | chr6:40385730-40385774                            | NM_175528:380       | E330009J07Rik | INSIDE                 | 1.842                                                        | 8.401                          | 5482.20            | 46054.93           | 15.474                         | 4148.33            | 64192.08           |
| A_68_P30253796 | chr15:59205558-59205602                           | NM_153548:127       | E430025E21Rik | INSIDE                 | 1.715                                                        | 7.918                          | 3792.74            | 30030.63           | 13.577                         | 2640.05            | 35843.98           |
| A_68_P27756942 | chr11:44432030-44432075                           | NM_007897:417       | Ebf1          | INSIDE                 | 1.820                                                        | 1.507                          | 645.68             | 973.03             | 2.742                          | 504.33             | 1383.01            |
| A_68_P29683667 | chr14:67850834-67850879                           | NM_010095:-1272     | Ebf2          | PROMOTER               | 2.044                                                        | 7.888                          | 448.05             | 3534.34            | 16.125                         | 291.83             | 4705.88            |
| A_68_P25565202 | chr7:144505325-144505370                          | NM_001113414:781    | Ebf3          | INSIDE                 | 1.915                                                        | 5.902                          | 4572.39            | 26987.78           | 11.301                         | 3496.84            | 39517.37           |
| A_68_P31252966 | chr17:56095674-56095719                           | NM_015766:3651      | Ebi3          | INSIDE                 | 1.548                                                        | 3.023                          | 2670.05            | 8070.77            | 4.679                          | 1946.40            | 9107.33            |

| ProbeName      | Target position of probe on CpG island microarray | TargetID          | GeneSymbol | CpG island Description | Ratio of relative methylation (TiO <sub>2</sub> -NP/Vehicle) | Sham group                     |                    |                    | TiO <sub>2</sub> -H group      |                    |                    |
|----------------|---------------------------------------------------|-------------------|------------|------------------------|--------------------------------------------------------------|--------------------------------|--------------------|--------------------|--------------------------------|--------------------|--------------------|
|                |                                                   |                   |            |                        |                                                              | Relative methylation (Cy5/Cy3) | Cy3 signal (Input) | Cy5 signal (MeDIP) | Relative methylation (Cy5/Cy3) | Cy3 signal (Input) | Cy5 signal (MeDIP) |
| A_68_P32242174 | chrX:7769836-7769880                              | NM_007898:780     | Ebp        | INSIDE                 | 2.170                                                        | 1.795                          | 3484.43            | 6255.21            | 3.896                          | 1401.56            | 5460.34            |
| A_68_P30588586 | chr16:20630082-20630126                           | NM_139293:181     | Ece2       | INSIDE                 | 1.721                                                        | 2.516                          | 2058.37            | 5178.35            | 4.328                          | 1688.09            | 7306.66            |
| A_68_P26543338 | chr9:57556763-57556807                            | NM_153799:409     | Ecd3       | INSIDE                 | 1.980                                                        | 7.076                          | 3933.06            | 27831.33           | 14.009                         | 2928.64            | 41028.03           |
| A_68_P24735989 | chr6:108778919-108778963                          | NM_138677:306     | Edem1      | INSIDE                 | 1.903                                                        | 3.777                          | 394.52             | 1490.21            | 7.189                          | 410.65             | 2952.03            |
| A_68_P26659818 | chr9:78329691-78329735                            | NM_010106:-181    | Eef1a1     | PROMOTER               | 1.735                                                        | 1.761                          | 947.75             | 1669.34            | 3.056                          | 778.65             | 2379.18            |
| A_68_P26659813 | chr9:78328998-78329042                            | NM_010106:511     | Eef1a1     | INSIDE                 | 1.607                                                        | 1.741                          | 1728.57            | 3008.93            | 2.798                          | 1437.16            | 4021.22            |
| A_68_P28962023 | chr13:38751002-38751046                           | NM_025380:-127    | Eef1e1     | PROMOTER               | 1.575                                                        | 2.491                          | 3706.13            | 9230.73            | 3.922                          | 2999.68            | 11764.15           |
| A_68_P29631109 | chr14:58617905-58617949                           | NM_028643:173     | Efha1      | INSIDE                 | 1.610                                                        | 2.344                          | 692.10             | 1622.39            | 3.773                          | 615.13             | 2321.20            |
| A_68_P20416757 | chr1:89160862-89160906                            | NM_028889:-54     | Efhd1      | PROMOTER               | 2.531                                                        | 6.089                          | 109823.20          | 668703.40          | 15.413                         | 67870.99           | 1046093.00         |
| A_68_P23366440 | chr4:141430540-141430584                          | NM_025994:273     | Efhd2      | INSIDE                 | 2.283                                                        | 2.694                          | 1008.85            | 2717.95            | 6.150                          | 893.14             | 5493.12            |
| A_68_P23366442 | chr4:141430855-141430899                          | NM_025994:-41     | Efhd2      | PROMOTER               | 1.614                                                        | 3.976                          | 1143.10            | 4545.11            | 6.418                          | 993.55             | 6376.66            |
| A_68_P22318578 | chr3:89126786-89126830                            | NM_010108:-7      | Efna3      | PROMOTER               | 1.720                                                        | 1.555                          | 6323.19            | 9831.44            | 2.675                          | 4671.38            | 12494.26           |
| A_68_P25637623 | chr8:8661349-8661393                              | NM_010111:-597    | Efnb2      | PROMOTER               | 1.535                                                        | 3.006                          | 909.85             | 2734.56            | 4.615                          | 760.62             | 3509.94            |
| A_68_P30287852 | chr15:65618774-65618818                           | NM_133766:194     | Efr3a      | INSIDE                 | 1.753                                                        | 1.928                          | 260.85             | 502.80             | 3.380                          | 253.86             | 858.03             |
| A_68_P28198379 | chr12:4038471-4038515                             | NM_001082483:423  | Efr3b      | INSIDE                 | 1.672                                                        | 4.411                          | 3726.36            | 16435.80           | 7.373                          | 2986.38            | 22017.64           |
| A_68_P29615096 | chr14:55545666-55545710                           | NM_010112:-63     | Efs        | DIVERGENT_PROMOTER     | 2.169                                                        | 18.040                         | 3597.05            | 64890.58           | 39.131                         | 2404.11            | 94075.39           |
| A_68_P29615089 | chr14:55545056-55545100                           | NM_010112:547     | Efs        | INSIDE                 | 1.969                                                        | 2.680                          | 3959.09            | 10609.07           | 5.277                          | 2914.31            | 15377.54           |
| A_68_P29699040 | chr14:70480133-70480177                           | NM_018781:2903    | Egr3       | DOWNSTREAM             | 1.810                                                        | 6.388                          | 3054.13            | 19508.73           | 11.561                         | 2484.02            | 28717.76           |
| A_68_P29699037 | chr14:70479901-70479945                           | NM_018781:2671    | Egr3       | INSIDE                 | 1.583                                                        | 4.276                          | 1107.75            | 4736.44            | 6.769                          | 861.94             | 5834.35            |
| A_68_P31933641 | chr19:6277445-6277489                             | NM_010119:571     | Ehd1       | INSIDE                 | 1.863                                                        | 2.535                          | 2307.03            | 5847.36            | 4.723                          | 1920.83            | 9072.38            |
| A_68_P28067423 | chr11:100181873-100181917                         | NM_011508:585     | Eif1       | INSIDE                 | 1.570                                                        | 2.429                          | 743.63             | 1806.49            | 3.813                          | 565.99             | 2158.28            |
| A_68_P30587818 | chr16:20498949-20498993                           | NM_172265:81      | Eif2b5     | INSIDE                 | 1.626                                                        | 1.709                          | 569.66             | 973.48             | 2.778                          | 495.87             | 1377.71            |
| A_68_P23280028 | chr4:126106770-126106814                          | NM_153402:-6      | Eif2c3     | PROMOTER               | 1.523                                                        | 3.112                          | 1596.04            | 4967.57            | 4.742                          | 1337.85            | 6343.42            |
| A_68_P21762932 | chr2:154718551-154718596                          | NM_026030:69      | Eif2s2     | INSIDE                 | 1.898                                                        | 3.101                          | 2784.28            | 8634.70            | 5.886                          | 2108.86            | 12413.38           |
| A_68_P28177063 | chr11:119161761-119161805                         | NM_138669:-425    | Eif4a3     | PROMOTER               | 1.944                                                        | 7.417                          | 3705.01            | 27478.19           | 14.417                         | 2789.51            | 40215.82           |
| A_68_P22569284 | chr3:138189919-138189963                          | NM_007917:786     | Eif4e      | INSIDE                 | 1.665                                                        | 4.216                          | 1266.57            | 5340.30            | 7.018                          | 1103.37            | 7743.61            |
| A_68_P27897958 | chr11:69734258-69734302                           | NM_001166590:-148 | Eif5a      | PROMOTER               | 1.595                                                        | 4.279                          | 6778.16            | 29002.29           | 6.825                          | 5191.36            | 35430.35           |
| A_68_P22019079 | chr3:28680302-28680346                            | NM_177586:92      | Eif5a2     | INSIDE                 | 1.574                                                        | 5.981                          | 1545.59            | 9243.98            | 9.412                          | 1505.64            | 14171.48           |
| A_68_P23103735 | chr4:91038685-91038729                            | NM_010486:40      | Elav12     | INSIDE                 | 1.747                                                        | 4.653                          | 2752.25            | 12806.90           | 8.127                          | 2275.41            | 18493.30           |
| A_68_P26350216 | chr9:21855292-21855336                            | NM_010487:1153    | Elav13     | INSIDE                 | 1.653                                                        | 2.648                          | 559.24             | 1480.63            | 4.377                          | 446.60             | 1954.97            |
| A_68_P26350213 | chr9:21855003-21855047                            | NM_010487:1443    | Elav13     | INSIDE                 | 1.641                                                        | 3.509                          | 2235.93            | 7845.85            | 5.757                          | 1856.32            | 10686.97           |
| A_68_P22128839 | chr3:51081429-51081473                            | NM_023502:48459   | Elf2       | INSIDE                 | 1.850                                                        | 5.104                          | 1669.02            | 8517.86            | 9.439                          | 1364.87            | 12883.47           |
| A_68_P22128834 | chr3:51080739-51080783                            | NM_023502:49149   | Elf2       | INSIDE                 | 1.812                                                        | 5.068                          | 3293.52            | 16690.08           | 9.184                          | 2567.56            | 23580.83           |
| A_68_P22128832 | chr3:51080406-51080450                            | NM_023502:49481   | Elf2       | INSIDE                 | 1.552                                                        | 2.100                          | 2655.74            | 5575.74            | 3.259                          | 2102.07            | 6851.41            |
| A_68_P32364765 | chrX:45806673-45806717                            | NM_019680:9615    | Elf4       | INSIDE                 | 1.738                                                        | 1.635                          | 1048.84            | 1715.36            | 2.842                          | 569.64             | 1619.14            |
| A_68_P24138256 | chr5:140384605-140384649                          | NM_175522:730     | Elf1n1     | INSIDE                 | 1.766                                                        | 9.868                          | 2008.19            | 19816.30           | 17.424                         | 1874.43            | 32660.71           |
| A_68_P24138663 | chr5:140449111-140449155                          | NM_175522:65236   | Elf1n1     | INSIDE                 | 1.511                                                        | 1.973                          | 1056.98            | 2085.69            | 2.981                          | 1263.29            | 3766.04            |
| A_68_P30361559 | chr15:78502925-78502969                           | NM_183141:45597   | Elf1n2     | INSIDE                 | 1.934                                                        | 7.718                          | 1295.22            | 9996.63            | 14.929                         | 1026.00            | 15316.62           |
| A_68_P30361566 | chr15:78503626-78503670                           | NM_183141:44895   | Elf1n2     | INSIDE                 | 1.814                                                        | 6.596                          | 1520.94            | 10032.69           | 11.964                         | 1350.77            | 16160.51           |
| A_68_P30361565 | chr15:78503546-78503590                           | NM_183141:44975   | Elf1n2     | INSIDE                 | 1.550                                                        | 3.398                          | 991.25             | 3368.41            | 5.267                          | 733.37             | 3862.41            |
| A_68_P26014555 | chr8:85856129-85856173                            | NM_001170691:235  | Elmod2     | INSIDE                 | 1.702                                                        | 4.294                          | 2829.27            | 12149.53           | 7.307                          | 2308.53            | 16868.67           |
| A_68_P28976807 | chr13:41315714-41315758                           | NM_019423:36      | Elov12     | INSIDE                 | 1.657                                                        | 0.384                          | 1063.81            | 408.94             | 0.637                          | 991.98             | 632.02             |
| A_68_P26685702 | chr9:83699787-83699831                            | NM_001145974:41   | Elov14     | INSIDE                 | 2.050                                                        | 7.487                          | 9488.45            | 71038.47           | 15.349                         | 7623.95            | 117020.20          |
| A_68_P21497226 | chr2:105744559-105744603                          | NM_023876:77      | Elp4       | INSIDE                 | 1.821                                                        | 4.077                          | 3355.27            | 13680.51           | 7.425                          | 2790.48            | 20720.57           |
| A_68_P31333820 | chr17:71660018-71660062                           | NM_145158:265     | Emilin2    | INSIDE                 | 1.775                                                        | 3.943                          | 1298.83            | 5121.79            | 7.000                          | 1128.92            | 7902.88            |
| A_68_P24603559 | chr6:85137815-85137859                            | NM_010131:-88     | Emx1       | PROMOTER               | 2.198                                                        | 6.948                          | 2502.06            | 17385.39           | 15.275                         | 1965.77            | 30027.50           |
| A_68_P24603556 | chr6:85137482-85137526                            | NM_010131:-420    | Emx1       | PROMOTER               | 1.741                                                        | 1.686                          | 1548.80            | 2610.51            | 2.934                          | 1261.23            | 3700.15            |

| ProbeName      | Target position of probe on CpG island microarray | TargetID           | GeneSymbol | CpG island Description | Ratio of relative methylation (TiO <sub>2</sub> -NP/Vehicle) | Sham group                     |                    |                    | TiO <sub>2</sub> -H group      |                    |                    |
|----------------|---------------------------------------------------|--------------------|------------|------------------------|--------------------------------------------------------------|--------------------------------|--------------------|--------------------|--------------------------------|--------------------|--------------------|
|                |                                                   |                    |            |                        |                                                              | Relative methylation (Cy5/Cy3) | Cy3 signal (Input) | Cy5 signal (MeDIP) | Relative methylation (Cy5/Cy3) | Cy3 signal (Input) | Cy5 signal (MeDIP) |
| A_68_P29250236 | chr13:98010968-98011012                           | NM_007930:-69      | Enc1       | PROMOTER               | 1.777                                                        | 7.313                          | 1585.24            | 11593.63           | 12.995                         | 1275.24            | 16571.48           |
| A_68_P26317084 | chr9:14185441-14185485                            | NM_028013:224      | Endod1     | INSIDE                 | 1.527                                                        | 1.671                          | 826.93             | 1381.89            | 2.551                          | 778.11             | 1985.00            |
| A_68_P32573188 | chrX:100689079-100689123                          | NR_015508:186      | Enox       | INSIDE                 | 2.124                                                        | 3.962                          | 3243.02            | 12847.80           | 8.416                          | 2143.69            | 18040.59           |
| A_68_P32573186 | chrX:100688845-100688889                          | NR_015508:-48      | Enox       | PROMOTER               | 1.921                                                        | 6.156                          | 1849.84            | 11386.70           | 11.827                         | 1373.86            | 16248.66           |
| A_68_P27010234 | chr10:24431792-24431836                           | NM_008813:94       | Enpp1      | INSIDE                 | 1.640                                                        | 6.266                          | 2456.72            | 15393.62           | 10.275                         | 2001.34            | 20564.38           |
| A_68_P21071854 | chr2:25251918-25251962                            | NM_009849:547      | Entpd2     | INSIDE                 | 1.722                                                        | 4.180                          | 2448.06            | 10232.39           | 7.196                          | 1935.00            | 13923.72           |
| A_68_P28598113 | chr12:85749685-85749729                           | NM_001026214:273   | Entpd5     | INSIDE                 | 2.269                                                        | 3.661                          | 3028.24            | 11086.95           | 8.308                          | 2223.13            | 18468.75           |
| A_68_P28598112 | chr12:85749605-85749649                           | NM_001026214:353   | Entpd5     | INSIDE                 | 1.790                                                        | 3.507                          | 2023.75            | 7097.12            | 6.279                          | 1689.57            | 10608.28           |
| A_68_P30378505 | chr15:81416613-81416657                           | NM_177821:-9       | Ep300      | PROMOTER               | 1.634                                                        | 2.357                          | 831.78             | 1960.41            | 3.851                          | 635.86             | 2448.47            |
| A_68_P30378507 | chr15:81416859-81416903                           | NM_177821:237      | Ep300      | INSIDE                 | 1.525                                                        | 1.529                          | 2839.79            | 4341.31            | 2.331                          | 2245.83            | 5234.89            |
| A_68_P23309923 | chr4:131604805-131604849                          | NM_001128606:167   | Epb4.1     | INSIDE                 | 1.512                                                        | 5.819                          | 1030.57            | 5996.78            | 8.796                          | 869.44             | 7647.47            |
| A_68_P31610600 | chr18:34165600-34165644                           | NM_013512:1238     | Epb4.114a  | INSIDE                 | 1.770                                                        | 4.669                          | 7245.25            | 33830.49           | 8.266                          | 5145.26            | 42531.44           |
| A_68_P21202301 | chr2:49307033-49307077                            | NM_172663:49       | Epc2       | INSIDE                 | 1.501                                                        | 2.387                          | 1763.84            | 4209.42            | 3.583                          | 1485.53            | 5322.72            |
| A_68_P23363266 | chr4:140864579-140864623                          | NM_010139:7446     | Epha2      | INSIDE                 | 1.585                                                        | 1.971                          | 645.57             | 1272.51            | 3.125                          | 472.81             | 1477.61            |
| A_68_P22803179 | chr4:28740971-28741015                            | NM_001122889:698   | Epha7      | INSIDE                 | 1.576                                                        | 2.231                          | 745.90             | 1664.05            | 3.515                          | 564.62             | 1984.76            |
| A_68_P23362641 | chr4:136391071-136391115                          | NM_010142:758      | Ephb2      | INSIDE                 | 2.322                                                        | 3.395                          | 3359.27            | 11404.09           | 7.883                          | 2536.99            | 19998.83           |
| A_68_P30590967 | chr16:21205377-21205421                           | NM_010143:531      | Ephb3      | INSIDE                 | 2.587                                                        | 10.916                         | 1196.74            | 13063.33           | 28.244                         | 837.42             | 23652.29           |
| A_68_P26940376 | chr10:11063434-11063478                           | NM_010146:214      | Epm2a      | INSIDE                 | 1.569                                                        | 2.438                          | 362.07             | 882.58             | 3.824                          | 380.29             | 1454.08            |
| A_68_P26940374 | chr10:11063250-11063294                           | NM_010146:30       | Epm2a      | INSIDE                 | 1.543                                                        | 2.782                          | 270.82             | 753.53             | 4.294                          | 282.19             | 1211.60            |
| A_68_P28033280 | chr11:94352619-94352663                           | NM_027984:8648     | Epn3       | INSIDE                 | 1.747                                                        | 14.019                         | 1245.75            | 17463.81           | 24.492                         | 945.71             | 23162.58           |
| A_68_P29488024 | chr14:28435732-28435776                           | NM_177814:127      | Erc2       | INSIDE                 | 1.663                                                        | 4.562                          | 1555.19            | 7095.31            | 7.589                          | 1247.87            | 9469.50            |
| A_68_P24992765 | chr7:19927675-19927719                            | NM_001127324:-2723 | Erc1       | PROMOTER               | 1.806                                                        | 8.013                          | 991.82             | 7947.64            | 14.469                         | 840.64             | 12163.27           |
| A_68_P30555522 | chr16:13110157-13110201                           | NM_015769:350      | Erec4      | INSIDE                 | 1.521                                                        | 2.963                          | 2035.68            | 6031.25            | 4.507                          | 1728.16            | 7789.45            |
| A_68_P20192816 | chr1:44204826-44204870                            | NM_011729:260      | Erec5      | INSIDE                 | 1.946                                                        | 6.459                          | 1824.46            | 11783.62           | 12.569                         | 1452.81            | 18260.66           |
| A_68_P32567492 | chrX:99352458-99352502                            | NM_146235:-50      | Erec61     | PROMOTER               | 1.793                                                        | 4.973                          | 810.47             | 4030.48            | 8.915                          | 463.28             | 4129.97            |
| A_68_P28576807 | chr12:81744426-81744470                           | NM_007951:400      | Erh        | INSIDE                 | 1.857                                                        | 8.037                          | 3705.65            | 29783.34           | 14.922                         | 2743.77            | 40942.16           |
| A_68_P28576811 | chr12:81744792-81744836                           | NM_007951:34       | Erh        | INSIDE                 | 1.676                                                        | 3.329                          | 3732.87            | 12426.91           | 5.578                          | 2902.64            | 16192.26           |
| A_68_P25780173 | chr8:36558550-36558594                            | NM_026067:15       | Eri1       | INSIDE                 | 1.802                                                        | 2.449                          | 747.61             | 1830.80            | 4.413                          | 663.58             | 2928.45            |
| A_68_P23235081 | chr4:117222839-117222883                          | NM_080469:-238     | Eri3       | PROMOTER               | 1.536                                                        | 1.899                          | 1162.81            | 2208.21            | 2.917                          | 989.53             | 2886.33            |
| A_68_P25672219 | chr8:14090321-14090365                            | NM_001034862:-15   | Erich1     | DIVERGENT_PROMOTER     | 1.518                                                        | 2.067                          | 1232.12            | 2546.24            | 3.138                          | 955.63             | 2998.66            |
| A_68_P27681336 | chr11:30854073-30854117                           | NM_025745:37       | Erlc1      | INSIDE                 | 1.849                                                        | 8.253                          | 1290.17            | 10647.89           | 15.262                         | 994.76             | 15181.97           |
| A_68_P22899537 | chr4:48292195-48292239                            | NM_029572:245      | Erp44      | INSIDE                 | 2.029                                                        | 6.351                          | 2110.38            | 13402.42           | 12.888                         | 1564.24            | 20159.97           |
| A_68_P22899538 | chr4:48292337-48292381                            | NM_029572:103      | Erp44      | INSIDE                 | 1.794                                                        | 2.440                          | 5149.30            | 12565.52           | 4.377                          | 3986.47            | 17447.60           |
| A_68_P23408691 | chr4:150229048-150229092                          | NM_133753:-129     | Errf1      | PROMOTER               | 1.687                                                        | 3.514                          | 1955.79            | 6873.54            | 5.929                          | 1754.32            | 10401.00           |
| A_68_P31490815 | chr18:10609631-10609677                           | NM_001081222:696   | Esco1      | INSIDE                 | 1.513                                                        | 2.126                          | 827.03             | 1758.24            | 3.216                          | 726.99             | 2338.32            |
| A_68_P29723690 | chr14:75131937-75131981                           | NM_016903:-193     | Esd        | PROMOTER               | 1.663                                                        | 4.245                          | 5108.14            | 21683.61           | 7.059                          | 3639.86            | 25692.86           |
| A_68_P23416733 | chr4:151506350-151506394                          | NM_019585:-3338    | Espn       | PROMOTER               | 1.863                                                        | 2.714                          | 1723.10            | 4676.52            | 5.057                          | 1235.44            | 6248.09            |
| A_68_P22729559 | chr4:11315357-11315401                            | NM_194055:-1448    | Esrp1      | PROMOTER               | 1.596                                                        | 1.674                          | 934.79             | 1565.25            | 2.673                          | 741.88             | 1982.85            |
| A_68_P32684276 | chrX:133653076-133653120                          | NM_007957:1767     | Esx1       | INSIDE                 | 2.514                                                        | 6.193                          | 1542.14            | 9549.78            | 15.565                         | 819.74             | 12759.33           |
| A_68_P32684282 | chrX:133653782-133653826                          | NM_007957:1061     | Esx1       | INSIDE                 | 1.595                                                        | 3.270                          | 3979.99            | 13014.37           | 5.216                          | 2354.09            | 12279.98           |
| A_68_P28767111 | chr12:117519591-117519635                         | NM_028731:-82      | Esy2       | PROMOTER               | 1.596                                                        | 2.903                          | 1504.28            | 4366.28            | 4.632                          | 1093.98            | 5067.52            |
| A_68_P25005645 | chr7:25370764-25370808                            | NM_023154:-1775    | Ethe1      | PROMOTER               | 1.952                                                        | 5.784                          | 9677.20            | 55972.42           | 11.292                         | 6298.59            | 71125.48           |
| A_68_P24908780 | chr6:143116314-143116358                          | NM_029250:587      | Etmk1      | INSIDE                 | 1.911                                                        | 4.120                          | 8609.83            | 35470.89           | 7.873                          | 6271.76            | 49378.43           |
| A_68_P24859175 | chr6:133985925-133985969                          | NM_007961:222      | Etv6       | INSIDE                 | 2.108                                                        | 3.752                          | 3350.18            | 12571.15           | 7.911                          | 2729.27            | 21590.99           |
| A_68_P24859179 | chr6:133986298-133986342                          | NM_007961:596      | Etv6       | INSIDE                 | 1.861                                                        | 4.825                          | 3201.66            | 15448.10           | 8.981                          | 2185.86            | 19630.72           |
| A_68_P24859169 | chr6:133985084-133985128                          | NM_007961:-618     | Etv6       | PROMOTER               | 1.757                                                        | 1.842                          | 1887.56            | 3476.45            | 3.235                          | 1459.11            | 4720.73            |
| A_68_P23969232 | chr5:108297963-108298007                          | NM_007964:6142     | Evi5       | INSIDE                 | 1.534                                                        | 3.333                          | 2981.35            | 9936.38            | 5.114                          | 2623.33            | 13416.10           |

| ProbeName      | Target position of probe on CpG island microarray | TargetID           | GeneSymbol    | CpG island Description | Ratio of relative methylation (TiO <sub>2</sub> -NP/Vehicle) | Sham group                     |                    |                    | TiO <sub>2</sub> -H group      |                    |                    |
|----------------|---------------------------------------------------|--------------------|---------------|------------------------|--------------------------------------------------------------|--------------------------------|--------------------|--------------------|--------------------------------|--------------------|--------------------|
|                |                                                   |                    |               |                        |                                                              | Relative methylation (Cy5/Cy3) | Cy3 signal (Input) | Cy5 signal (MeDIP) | Relative methylation (Cy5/Cy3) | Cy3 signal (Input) | Cy5 signal (MeDIP) |
| A_68_P28728718 | chr12:109792810-109792854                         | NM_001163394-97    | Evl           | PROMOTER               | 1.676                                                        | 3.664                          | 11008.12           | 40332.18           | 6.141                          | 7496.69            | 46040.40           |
| A_68_P28158070 | chr11:11608313-116083358                          | NM_025276:16070    | Evpl          | INSIDE                 | 1.527                                                        | 6.358                          | 2493.61            | 15855.54           | 9.710                          | 1964.19            | 19072.41           |
| A_68_P24449862 | chr6:52264017-52264061                            | NM_007966:547      | Evx1          | INSIDE                 | 1.557                                                        | 3.027                          | 2102.31            | 6363.00            | 4.712                          | 1730.99            | 8155.65            |
| A_68_P28575798 | chr12:81564728-81564777                           | NM_133798:671      | Exd2          | INSIDE                 | 2.218                                                        | 7.448                          | 1524.74            | 11356.43           | 16.524                         | 1070.78            | 17693.19           |
| A_68_P28920307 | chr13:31065636-31065680                           | NM_025588:258      | Exoc2         | INSIDE                 | 1.651                                                        | 1.876                          | 3310.55            | 6212.09            | 3.098                          | 2322.28            | 7193.72            |
| A_68_P26132767 | chr8:107813885-107813929                          | NM_177788:6092     | Exoc31        | INSIDE                 | 1.510                                                        | 1.383                          | 3404.14            | 4707.23            | 2.088                          | 2623.45            | 5478.57            |
| A_68_P28158619 | chr11:116168104-116168148                         | NM_001162872-74    | Exoc7         | PROMOTER               | 1.650                                                        | 3.395                          | 574.55             | 1950.42            | 5.602                          | 532.83             | 2984.86            |
| A_68_P26248330 | chr8:127421598-127421642                          | NM_198103:-15      | Exoc8         | DIVERGENT_PROMOTER     | 1.850                                                        | 4.396                          | 1582.35            | 6956.78            | 8.135                          | 1298.63            | 10564.61           |
| A_68_P27003030 | chr10:23069823-23069869                           | NM_010167:-137     | Eya4          | PROMOTER               | 1.732                                                        | 3.286                          | 434.32             | 1427.34            | 5.692                          | 439.18             | 2499.66            |
| A_68_P24423934 | chr6:47544675-47544719                            | NM_001146689:333   | Ezh2          | INSIDE                 | 2.559                                                        | 4.342                          | 3868.12            | 16795.29           | 11.113                         | 2711.43            | 30131.82           |
| A_68_P27289087 | chr10:80820153-80820197                           | NM_028657:-140     | F630110N24Rik | DIVERGENT_PROMOTER     | 1.569                                                        | 2.472                          | 1187.14            | 2934.50            | 3.880                          | 956.23             | 3709.79            |
| A_68_P31948062 | chr19:10115784-10115828                           | NM_021890-231      | Fads3         | PROMOTER               | 2.268                                                        | 7.995                          | 626.39             | 5008.14            | 18.133                         | 509.60             | 9240.45            |
| A_68_P24064187 | chr5:125491813-125491857                          | NM_028443:7990     | Fam101a       | INSIDE                 | 2.018                                                        | 3.517                          | 2606.98            | 9168.48            | 7.098                          | 1942.22            | 13786.55           |
| A_68_P21115867 | chr2:32391280-32391324                            | NM_153560:424      | Fam102a       | INSIDE                 | 1.831                                                        | 2.476                          | 1103.59            | 2732.88            | 4.533                          | 852.12             | 3863.05            |
| A_68_P21115865 | chr2:32391002-32391046                            | NM_153560:146      | Fam102a       | INSIDE                 | 1.540                                                        | 2.078                          | 1162.78            | 2416.42            | 3.200                          | 965.79             | 3090.04            |
| A_68_P22415887 | chr3:108830521-108830565                          | NM_001163567:-17   | Fam102b       | PROMOTER               | 1.709                                                        | 30.067                         | 421.02             | 12658.99           | 51.391                         | 305.92             | 15721.46           |
| A_68_P25273848 | chr7:88908491-88908535                            | NM_025997:674      | Fam103a1      | INSIDE                 | 2.059                                                        | 5.435                          | 741.82             | 4031.91            | 11.189                         | 588.81             | 6587.93            |
| A_68_P30093919 | chr15:27611395-27611439                           | NM_198301:-163     | Fam105a       | PROMOTER               | 1.860                                                        | 6.742                          | 2286.11            | 15412.02           | 12.541                         | 1862.41            | 23356.17           |
| A_68_P30093918 | chr15:27611330-27611374                           | NM_198301:-99      | Fam105a       | PROMOTER               | 1.650                                                        | 2.064                          | 569.45             | 1175.50            | 3.407                          | 609.04             | 2074.72            |
| A_68_P30093655 | chr15:27560477-27560521                           | NM_001013792:-50   | Fam105b       | PROMOTER               | 1.889                                                        | 3.790                          | 4711.05            | 17853.99           | 7.158                          | 3397.60            | 24320.69           |
| A_68_P20963945 | chr2:3630790-3630834                              | NM_025626:83       | Fam107b       | INSIDE                 | 1.973                                                        | 1.721                          | 749.08             | 1289.47            | 3.396                          | 585.50             | 1988.33            |
| A_68_P32007552 | chr19:21727793-21727837                           | NM_146096:16       | Fam108b       | INSIDE                 | 1.587                                                        | 4.598                          | 476.18             | 2189.70            | 7.296                          | 384.95             | 2808.78            |
| A_68_P24046831 | chr5:122293021-122293065                          | NM_175474:-5994    | Fam109a       | DIVERGENT_PROMOTER     | 2.136                                                        | 2.255                          | 193.72             | 436.93             | 4.817                          | 167.27             | 805.78             |
| A_68_P22702205 | chr4:5571555-5571599                              | NM_173426:251      | Fam110b       | INSIDE                 | 1.681                                                        | 6.974                          | 1660.64            | 11580.84           | 11.726                         | 1443.83            | 16930.61           |
| A_68_P28329059 | chr12:31758655-31758699                           | NM_027828:-156     | Fam110c       | PROMOTER               | 1.608                                                        | 2.881                          | 1404.76            | 4046.65            | 4.632                          | 1230.34            | 5698.63            |
| A_68_P23753715 | chr5:65361156-65361200                            | NM_026667:-135     | Fam114a1      | DIVERGENT_PROMOTER     | 1.710                                                        | 4.115                          | 2530.52            | 10412.20           | 7.037                          | 2134.05            | 15016.51           |
| A_68_P20266458 | chr1:59969786-59969830                            | NM_001037725:-41   | Fam117b       | PROMOTER               | 2.045                                                        | 6.604                          | 2387.87            | 15770.47           | 13.504                         | 1898.02            | 25630.46           |
| A_68_P26421598 | chr9:35075374-35075418                            | NM_175411:-31      | Fam118b       | DIVERGENT_PROMOTER     | 1.752                                                        | 1.543                          | 895.51             | 1381.34            | 2.703                          | 863.11             | 2333.18            |
| A_68_P32386813 | chrX:50622802-50622846                            | NM_001166365:158   | Fam122b       | INSIDE                 | 1.789                                                        | 8.506                          | 5647.04            | 48031.03           | 15.218                         | 2876.24            | 43771.99           |
| A_68_P29644193 | chr14:60997735-60997779                           | NM_001164705:634   | Fam123a       | INSIDE                 | 1.722                                                        | 3.402                          | 1085.16            | 3691.29            | 5.858                          | 923.00             | 5406.96            |
| A_68_P21124370 | chr2:33742800-33742844                            | NM_175184:644      | Fam125b       | INSIDE                 | 1.540                                                        | 2.933                          | 4745.41            | 13920.28           | 4.516                          | 3493.69            | 15778.51           |
| A_68_P23539566 | chr5:23536151-23536195                            | NM_053090:329      | Fam126a       | INSIDE                 | 1.565                                                        | 4.054                          | 2121.20            | 8598.55            | 6.346                          | 1830.88            | 11618.57           |
| A_68_P20259677 | chr1:58643036-58643080                            | NM_172513:119      | Fam126b       | INSIDE                 | 2.034                                                        | 5.228                          | 4857.54            | 25394.96           | 10.635                         | 3718.15            | 39544.05           |
| A_68_P25957751 | chr8:74126551-74126595                            | NM_001166213:5028  | Fam129c       | INSIDE                 | 1.746                                                        | 2.904                          | 1868.37            | 5424.90            | 5.071                          | 1476.20            | 7485.77            |
| A_68_P24397660 | chr6:42274774-42274818                            | NM_001113327:-157  | Fam131b       | PROMOTER               | 1.784                                                        | 2.154                          | 2777.70            | 5982.65            | 3.841                          | 2513.41            | 9655.11            |
| A_68_P20442011 | chr1:93263227-93263272                            | NM_173395:243      | Fam132b       | INSIDE                 | 1.744                                                        | 3.148                          | 2766.94            | 8709.43            | 5.489                          | 2276.05            | 12492.45           |
| A_68_P20012423 | chr1:6373229-6373273                              | NM_001195732:23839 | Fam150a       | INSIDE                 | 1.996                                                        | 3.088                          | 938.57             | 2898.62            | 6.165                          | 860.84             | 5306.75            |
| A_68_P25644704 | chr8:9771350-9771394                              | NM_173446:-349     | Fam155a       | PROMOTER               | 1.907                                                        | 12.194                         | 23543.03           | 287086.60          | 23.250                         | 14771.44           | 343435.70          |
| A_68_P25644699 | chr8:9770615-9770659                              | NM_173446:387      | Fam155a       | INSIDE                 | 1.814                                                        | 5.687                          | 3346.03            | 19027.70           | 10.313                         | 2684.47            | 27685.74           |
| A_68_P25641012 | chr8:9207827-9207871                              | NM_173446:563175   | Fam155a       | INSIDE                 | 1.783                                                        | 2.152                          | 310.81             | 668.92             | 3.836                          | 231.54             | 888.28             |
| A_68_P23195768 | chr4:108055890-108055934                          | NM_001099303:42    | Fam159a       | INSIDE                 | 1.850                                                        | 3.727                          | 1717.43            | 6400.97            | 6.893                          | 1331.16            | 9176.22            |
| A_68_P25392116 | chr7:112548270-112548314                          | NM_199009:233      | Fam160a2      | INSIDE                 | 1.927                                                        | 3.135                          | 3303.29            | 10354.85           | 6.040                          | 2514.41            | 15186.65           |
| A_68_P25392118 | chr7:112548478-112548522                          | NM_199009:25       | Fam160a2      | INSIDE                 | 1.620                                                        | 2.580                          | 1482.11            | 3824.40            | 4.181                          | 1279.22            | 5348.77            |
| A_68_P20741945 | chr1:158134987-158135031                          | NM_177838:148      | Fam163a       | INSIDE                 | 2.344                                                        | 0.728                          | 1936.10            | 1410.28            | 1.708                          | 1837.68            | 3138.08            |
| A_68_P20140952 | chr1:34899643-34899687                            | NM_001160235:231   | Fam168b       | INSIDE                 | 1.568                                                        | 3.941                          | 1156.93            | 4558.99            | 6.180                          | 1041.76            | 6438.55            |
| A_68_P28079629 | chr11:102308671-102308715                         | NM_199200:285      | Fam171a2      | INSIDE                 | 1.686                                                        | 1.895                          | 1504.43            | 2851.23            | 3.195                          | 1335.07            | 4265.03            |
| A_68_P31106282 | chr17:25929216-25929260                           | NM_145410:-9       | Fam173a       | PROMOTER               | 2.109                                                        | 4.902                          | 4593.98            | 22517.64           | 10.336                         | 3445.66            | 35614.77           |

| ProbeName      | Target position of probe on CpG Island microarray | TargetID           | GeneSymbol | CpG island Description | Ratio of relative methylation (TiO <sub>2</sub> -NP/Vehicle) | Sham group                     |                    |                    | TiO <sub>2</sub> -H group      |                    |                    |
|----------------|---------------------------------------------------|--------------------|------------|------------------------|--------------------------------------------------------------|--------------------------------|--------------------|--------------------|--------------------------------|--------------------|--------------------|
|                |                                                   |                    |            |                        |                                                              | Relative methylation (Cy5/Cy3) | Cy3 signal (Input) | Cy5 signal (MeDIP) | Relative methylation (Cy5/Cy3) | Cy3 signal (Input) | Cy5 signal (MeDIP) |
| A_68_P20462986 | chr1:97210270-97210314                            | NM_026321:88       | Fam174a    | INSIDE                 | 1.572                                                        | 2.255                          | 485.23             | 1094.27            | 3.546                          | 465.92             | 1651.96            |
| A_68_P23278482 | chr4:125826960-125827005                          | NM_172145:1736     | Fam176b    | INSIDE                 | 2.373                                                        | 12.234                         | 2471.48            | 30237.07           | 29.028                         | 1293.78            | 37556.21           |
| A_68_P32135373 | chr19:45005375-45005419                           | NM_001081225:-212  | Fam178a    | PROMOTER               | 1.623                                                        | 2.807                          | 2918.14            | 8191.52            | 4.556                          | 2514.21            | 11455.31           |
| A_68_P25328173 | chr7:100228372-100228416                          | NM_021427:6        | Fam181b    | INSIDE                 | 1.787                                                        | 2.659                          | 1172.86            | 3119.18            | 4.753                          | 871.74             | 4143.13            |
| A_68_P23657737 | chr5:46030747-46030791                            | NM_021416:-28      | Fam184b    | PROMOTER               | 1.909                                                        | 1.799                          | 1547.18            | 2783.68            | 3.435                          | 1287.38            | 4422.59            |
| A_68_P23525900 | chr5:20931065-20931109                            | NM_177869:366      | Fam185a    | INSIDE                 | 1.501                                                        | 1.522                          | 1176.74            | 1790.95            | 2.284                          | 1000.93            | 2286.17            |
| A_68_P27856224 | chr11:62692825-62692869                           | NM_026210:-145     | Fam18b     | PROMOTER               | 2.301                                                        | 8.002                          | 44876.32           | 359089.20          | 18.410                         | 25812.74           | 475218.60          |
| A_68_P27856227 | chr11:62693165-62693209                           | NM_026210:195      | Fam18b     | INSIDE                 | 1.741                                                        | 6.334                          | 2125.21            | 13461.23           | 11.029                         | 1638.86            | 18075.66           |
| A_68_P29055901 | chr13:55672343-55672387                           | NM_001162881:-1028 | Fam193b    | PROMOTER               | 1.763                                                        | 2.951                          | 2122.69            | 6264.39            | 5.202                          | 1772.94            | 9223.40            |
| A_68_P25549531 | chr7:142129256-142129301                          | NM_001143802:835   | Fam196a    | INSIDE                 | 2.072                                                        | 3.078                          | 1300.45            | 4002.22            | 6.375                          | 952.86             | 6074.71            |
| A_68_P32683852 | chrX:133584183-133584227                          | NM_146261:72       | Fam199x    | INSIDE                 | 2.299                                                        | 5.605                          | 36252.91           | 203197.50          | 12.886                         | 25460.36           | 328071.30          |
| A_68_P30347864 | chr15:76199968-76200012                           | NM_021555:663      | Fam203a    | INSIDE                 | 1.590                                                        | 1.972                          | 711.02             | 1402.24            | 3.137                          | 582.35             | 1826.67            |
| A_68_P27055250 | chr10:33847341-33847385                           | NM_175449:416      | Fam26f     | INSIDE                 | 1.570                                                        | 3.541                          | 2209.17            | 7822.10            | 5.557                          | 1786.17            | 9926.43            |
| A_68_P26234161 | chr8:125074980-125075024                          | NM_001037298:227   | Fam38a     | INSIDE                 | 1.712                                                        | 3.407                          | 554.37             | 1888.59            | 5.832                          | 500.29             | 2917.83            |
| A_68_P32467861 | chrX:71638358-71638402                            | NM_025473:98       | Fam3a      | INSIDE                 | 1.682                                                        | 4.438                          | 2419.47            | 10737.62           | 7.463                          | 1406.81            | 10498.39           |
| A_68_P24329145 | chr6:29866863-29866907                            | NM_001037740:-128  | Fam40b     | PROMOTER               | 1.720                                                        | 3.229                          | 355.25             | 1147.20            | 5.556                          | 308.76             | 1715.42            |
| A_68_P23345562 | chr4:137952020-137952064                          | NM_001081672:331   | Fam43b     | INSIDE                 | 1.512                                                        | 2.773                          | 891.39             | 2472.07            | 4.193                          | 757.52             | 3175.97            |
| A_68_P26693194 | chr9:85220859-85220903                            | NM_001160379:-123  | Fam46a     | PROMOTER               | 2.018                                                        | 2.016                          | 961.09             | 1937.50            | 4.067                          | 820.03             | 3335.24            |
| A_68_P30278749 | chr15:63829759-63829803                           | NM_144846:62230    | Fam49b     | INSIDE                 | 2.073                                                        | 3.646                          | 2844.80            | 10373.26           | 7.558                          | 2230.18            | 16854.81           |
| A_68_P23590169 | chr5:33972359-33972403                            | NM_178390:-96      | Fam53a     | PROMOTER               | 1.765                                                        | 2.637                          | 5515.12            | 14543.40           | 4.654                          | 4415.98            | 20551.40           |
| A_68_P23590170 | chr5:33972447-33972492                            | NM_178390:-185     | Fam53a     | PROMOTER               | 1.690                                                        | 4.543                          | 10365.60           | 47091.67           | 7.678                          | 7189.64            | 55203.47           |
| A_68_P25537056 | chr7:140005623-140005667                          | NM_212473:-765     | Fam53b     | PROMOTER               | 1.734                                                        | 2.759                          | 1651.86            | 4558.12            | 4.785                          | 1316.60            | 6299.36            |
| A_68_P23323339 | chr4:134091201-134091245                          | NM_029759:-2555    | Fam54b     | PROMOTER               | 1.642                                                        | 2.789                          | 1422.20            | 3966.22            | 4.578                          | 1228.16            | 5622.49            |
| A_68_P27930557 | chr11:76015854-76015898                           | NM_027773:319      | Fam57a     | INSIDE                 | 1.904                                                        | 3.875                          | 1497.57            | 5802.80            | 7.379                          | 1271.09            | 9379.09            |
| A_68_P27930554 | chr11:76015406-76015450                           | NM_027773:-129     | Fam57a     | PROMOTER               | 1.542                                                        | 2.236                          | 2797.45            | 6253.97            | 3.446                          | 2477.12            | 8536.80            |
| A_68_P31544271 | chr18:21458929-21458973                           | NM_001033445:-310  | Fam59a     | PROMOTER               | 2.408                                                        | 7.221                          | 15083.00           | 108913.00          | 17.386                         | 9309.07            | 161852.10          |
| A_68_P24942904 | chr6:148895207-148895251                          | NM_019643:-274     | Fam60a     | PROMOTER               | 1.989                                                        | 4.671                          | 2575.90            | 12031.24           | 9.289                          | 2051.98            | 19060.53           |
| A_68_P24942897 | chr6:148894399-148894443                          | NM_019643:534      | Fam60a     | INSIDE                 | 1.921                                                        | 4.150                          | 1979.80            | 8216.13            | 7.973                          | 1511.82            | 12053.87           |
| A_68_P24942894 | chr6:148893997-148894041                          | NM_019643:936      | Fam60a     | INSIDE                 | 1.544                                                        | 4.314                          | 2874.14            | 12399.49           | 6.660                          | 2592.69            | 17268.14           |
| A_68_P26617701 | chr9:70504626-70504670                            | NM_172772:333      | Fam63b     | INSIDE                 | 1.616                                                        | 4.671                          | 1854.17            | 8661.53            | 7.548                          | 1656.06            | 12499.60           |
| A_68_P27909076 | chr11:71855740-71855784                           | NM_144526:-241     | Fam64a     | DIVERGENT_PROMOTER     | 1.620                                                        | 3.912                          | 2415.26            | 9447.36            | 6.336                          | 2014.18            | 12761.04           |
| A_68_P23314731 | chr4:132478927-132478977                          | NM_001163792:-486  | Fam76a     | PROMOTER               | 1.821                                                        | 2.349                          | 1010.77            | 2374.41            | 4.277                          | 696.91             | 2980.48            |
| A_68_P26313788 | chr9:13632555-13632599                            | NM_176836:406      | Fam76b     | INSIDE                 | 1.600                                                        | 1.733                          | 1041.18            | 1804.15            | 2.773                          | 816.41             | 2263.88            |
| A_68_P21113215 | chr2:31939833-31939877                            | NM_175511:-629     | Fam78a     | PROMOTER               | 2.031                                                        | 5.322                          | 1178.34            | 6271.46            | 10.808                         | 1047.04            | 11316.20           |
| A_68_P30345428 | chr15:75834117-75834161                           | NM_001168253:5790  | Fam83h     | INSIDE                 | 1.584                                                        | 8.887                          | 2371.19            | 21072.30           | 14.073                         | 1940.59            | 27309.55           |
| A_68_P30261330 | chr15:60655945-60655989                           | NM_001162926:669   | Fam84b     | INSIDE                 | 1.775                                                        | 3.498                          | 751.96             | 2630.19            | 6.210                          | 645.31             | 4007.21            |
| A_68_P30261334 | chr15:60656407-60656451                           | NM_001162926:207   | Fam84b     | INSIDE                 | 1.735                                                        | 2.756                          | 867.52             | 2391.32            | 4.784                          | 695.50             | 3327.13            |
| A_68_P21556816 | chr2:117075560-117075604                          | NM_026620:108      | Fam98b     | INSIDE                 | 1.520                                                        | 2.828                          | 1580.47            | 4470.05            | 4.299                          | 1399.84            | 6017.61            |
| A_68_P25176629 | chr7:71518985-71519029                            | NM_177893:-25      | Fan1       | PROMOTER               | 2.306                                                        | 4.347                          | 1205.52            | 5239.99            | 10.023                         | 908.82             | 9109.01            |
| A_68_P28947125 | chr13:36209443-36209487                           | NM_001039189:185   | Fars2      | INSIDE                 | 1.673                                                        | 3.957                          | 2648.53            | 10479.59           | 6.621                          | 2399.06            | 15884.25           |
| A_68_P32846303 | chr1:78485277-78485321                            | NM_011811:123      | Farsb      | INSIDE                 | 1.701                                                        | 2.498                          | 580.73             | 1450.60            | 4.249                          | 463.22             | 1968.35            |
| A_68_P28187039 | chr11:120686317-120686365                         | NM_007988:-479     | Fasn       | PROMOTER               | 1.682                                                        | 4.348                          | 211.73             | 920.69             | 7.315                          | 146.38             | 1070.69            |
| A_68_P29110678 | chr13:68721295-68721339                           | NM_027123:192      | Fastkd3    | INSIDE                 | 1.564                                                        | 2.559                          | 2112.04            | 5405.13            | 4.002                          | 1553.20            | 6215.74            |
| A_68_P21621794 | chr2:128690006-128690050                          | NM_024237:361      | Fbln7      | INSIDE                 | 2.332                                                        | 1.496                          | 749.56             | 1121.25            | 3.489                          | 627.27             | 2188.52            |
| A_68_P31741000 | chr18:58369346-58369390                           | NM_010181:212      | Fbn2       | INSIDE                 | 1.546                                                        | 5.117                          | 3637.60            | 18612.62           | 7.912                          | 2582.50            | 20433.97           |
| A_68_P23647569 | chr5:44173172-44173216                            | NM_001159963:194   | Fbx15      | INSIDE                 | 1.905                                                        | 5.037                          | 4066.60            | 20482.39           | 9.597                          | 2939.28            | 28208.15           |
| A_68_P23647570 | chr5:44173303-44173347                            | NM_001159963:64    | Fbx15      | INSIDE                 | 1.719                                                        | 3.873                          | 1869.08            | 7238.82            | 6.659                          | 1685.32            | 11222.52           |



| ProbeName      | Target position of probe on CpG island microarray | TargetID           | GeneSymbol | CpG island Description | Ratio of relative methylation (TiO <sub>2</sub> -NP/Vehicle) | Sham group                     |                    |                    | TiO <sub>2</sub> -H group      |                    |                    |
|----------------|---------------------------------------------------|--------------------|------------|------------------------|--------------------------------------------------------------|--------------------------------|--------------------|--------------------|--------------------------------|--------------------|--------------------|
|                |                                                   |                    |            |                        |                                                              | Relative methylation (Cy5/Cy3) | Cy3 signal (Input) | Cy5 signal (MeDIP) | Relative methylation (Cy5/Cy3) | Cy3 signal (Input) | Cy5 signal (MeDIP) |
| A_68_P26132587 | chr8:107788500-107788544                          | NM_015821:-25      | Fbx18      | DIVERGENT_PROMOTER     | 1.752                                                        | 3.803                          | 715.63             | 2721.64            | 6.664                          | 631.31             | 4207.03            |
| A_68_P25023124 | chr7:29478378-29478422                            | NM_001163702:238   | Fbxo27     | INSIDE                 | 1.599                                                        | 1.525                          | 1881.91            | 2870.40            | 2.439                          | 1510.43            | 3683.48            |
| A_68_P30246699 | chr15:58046420-58046464                           | NM_026346:-9       | Fbxo32     | PROMOTER               | 1.802                                                        | 1.596                          | 1220.54            | 1947.77            | 2.876                          | 1004.10            | 2888.22            |
| A_68_P31764312 | chr18:62708242-62708286                           | NM_134136:133      | Fbxo38     | INSIDE                 | 2.287                                                        | 2.829                          | 9614.08            | 27195.70           | 6.469                          | 6425.64            | 41568.23           |
| A_68_P27910787 | chr11:72128038-72128082                           | NM_001099688:115   | Fbxo39     | INSIDE                 | 1.516                                                        | 3.848                          | 1223.64            | 4709.14            | 5.834                          | 1038.74            | 6060.44            |
| A_68_P23362414 | chr4:140703695-140703739                          | NM_172518:-120     | Fbxo42     | DIVERGENT_PROMOTER     | 1.574                                                        | 1.696                          | 1041.78            | 1767.35            | 2.670                          | 914.58             | 2441.71            |
| A_68_P30137020 | chr15:36094444-36094488                           | NM_001081253:173   | Fbxo43     | INSIDE                 | 1.860                                                        | 5.797                          | 2825.11            | 16376.00           | 10.784                         | 2325.91            | 25082.19           |
| A_68_P28053223 | chr11:97744951-97744995                           | NM_001081435:496   | Fbxo47     | INSIDE                 | 2.589                                                        | 10.903                         | 9736.38            | 106154.20          | 28.224                         | 4882.70            | 137808.30          |
| A_68_P28053229 | chr11:97745535-97745579                           | NM_001081435:-88   | Fbxo47     | PROMOTER               | 2.226                                                        | 7.628                          | 7635.22            | 58240.73           | 16.982                         | 4804.99            | 81599.95           |
| A_68_P23392700 | chr4:147525826-147525870                          | NM_001163704:186   | Fbxo6      | INSIDE                 | 1.802                                                        | 5.283                          | 4542.00            | 23995.44           | 9.522                          | 3913.81            | 37267.97           |
| A_68_P26658155 | chr9:77956059-77956103                            | NM_023605:383      | Fbxo9      | INSIDE                 | 2.294                                                        | 9.040                          | 3947.31            | 35683.72           | 20.740                         | 3181.35            | 65981.75           |
| A_68_P22293161 | chr3:84619085-84619129                            | NM_001177773:-392  | Fbxw7      | PROMOTER               | 2.089                                                        | 7.473                          | 3528.14            | 26366.72           | 15.611                         | 2725.81            | 42552.94           |
| A_68_P20826000 | chr1:172995096-172995140                          | NM_010188:-5584    | Fcgr3      | PROMOTER               | 1.526                                                        | 2.291                          | 17110.18           | 39195.13           | 3.495                          | 12593.44           | 44016.75           |
| A_68_P29259683 | chr13:99585179-99585223                           | NM_172591:204      | Fcho2      | INSIDE                 | 1.592                                                        | 4.182                          | 1087.69            | 4548.58            | 6.660                          | 923.46             | 6149.83            |
| A_68_P31677413 | chr18:46685542-46685586                           | NM_173423:61       | Fem1c      | INSIDE                 | 1.507                                                        | 1.993                          | 1402.64            | 2795.91            | 3.005                          | 1532.05            | 4603.56            |
| A_68_P31371532 | chr17:78817452-78817496                           | NM_199448:-31      | Fez2       | PROMOTER               | 1.527                                                        | 5.391                          | 8891.70            | 47938.00           | 8.235                          | 6744.37            | 55539.39           |
| A_68_P24295432 | chr6:23203617-23203661                            | NM_028462:-5374    | Fezf1      | PROMOTER               | 2.117                                                        | 4.889                          | 2303.60            | 11263.08           | 10.350                         | 1828.01            | 18919.61           |
| A_68_P29410675 | chr14:13178814-13178858                           | NM_080433:-457     | Fezf2      | PROMOTER               | 1.726                                                        | 2.747                          | 3144.30            | 3144.30            | 4.740                          | 883.06             | 4185.46            |
| A_68_P32743933 | chrX:147481461-147481505                          | NM_008001:-293     | Fgd1       | PROMOTER               | 1.909                                                        | 4.057                          | 3063.49            | 12429.23           | 7.745                          | 1840.37            | 14252.89           |
| A_68_P29369781 | chr13:119503243-119503287                         | NM_008002:-241     | Fgf10      | PROMOTER               | 1.986                                                        | 4.921                          | 7424.08            | 36535.57           | 9.775                          | 5894.22            | 57617.72           |
| A_68_P30630406 | chr16:28445546-28445590                           | NM_183064:-255     | Fgf12      | PROMOTER               | 2.053                                                        | 2.897                          | 1614.92            | 4677.83            | 5.947                          | 1132.49            | 6734.62            |
| A_68_P25609917 | chr7:152082446-152082490                          | NM_008003:32       | Fgf15      | INSIDE                 | 1.934                                                        | 2.354                          | 2711.42            | 6383.42            | 4.554                          | 2263.15            | 10306.32           |
| A_68_P25609544 | chr7:152024886-152024930                          | NM_008007:392      | Fgf3       | INSIDE                 | 1.731                                                        | 2.429                          | 1335.04            | 3242.95            | 4.204                          | 1106.16            | 4650.24            |
| A_68_P25609686 | chr7:152047482-152047526                          | NM_010202:214      | Fgf4       | INSIDE                 | 1.644                                                        | 5.163                          | 1113.15            | 5747.23            | 8.487                          | 946.39             | 8032.38            |
| A_68_P32140182 | chr19:45811402-45811446                           | NM_001166361:-5950 | Fgf8       | INSIDE                 | 1.535                                                        | 5.312                          | 3067.67            | 16296.33           | 8.155                          | 2340.21            | 19085.57           |
| A_68_P29631470 | chr14:58691022-58691066                           | NM_013518:-478     | Fgf9       | PROMOTER               | 1.882                                                        | 5.806                          | 1512.20            | 8780.06            | 10.924                         | 1230.13            | 13438.37           |
| A_68_P25727484 | chr8:26629202-26629246                            | NM_001079908:-19   | Fgfr1      | PROMOTER               | 1.838                                                        | 2.463                          | 1456.02            | 3585.62            | 4.527                          | 1219.57            | 5521.00            |
| A_68_P29053522 | chr13:55254151-55254195                           | NM_008011:-6       | Fgfr4      | PROMOTER               | 1.824                                                        | 5.512                          | 1658.26            | 9140.76            | 10.054                         | 1504.20            | 15122.59           |
| A_68_P20849151 | chr1:177555721-177555765                          | NM_010209:24       | Fh1        | INSIDE                 | 1.716                                                        | 3.071                          | 7119.66            | 21865.76           | 5.271                          | 5209.52            | 27886.33           |
| A_68_P20849149 | chr1:177555403-177555447                          | NM_010209:342      | Fh1        | INSIDE                 | 1.635                                                        | 2.754                          | 1911.22            | 5263.50            | 4.503                          | 1609.59            | 7248.39            |
| A_68_P29403726 | chr14:11994369-11994413                           | NM_010210:156      | Fhit       | INSIDE                 | 1.713                                                        | 3.069                          | 5639.46            | 17306.04           | 5.257                          | 4585.36            | 24106.61           |
| A_68_P20187367 | chr1:43220695-43220739                            | NM_010212:90       | Fhl2       | INSIDE                 | 1.824                                                        | 6.556                          | 1156.88            | 7584.06            | 11.958                         | 1018.56            | 12180.28           |
| A_68_P23269776 | chr4:124378137-124378181                          | NM_010213:216      | Fhl3       | INSIDE                 | 1.767                                                        | 3.462                          | 657.54             | 2276.40            | 6.116                          | 625.75             | 3826.93            |
| A_68_P31561526 | chr18:24868000-24868044                           | NM_175276:77       | Fhod3      | INSIDE                 | 1.786                                                        | 4.266                          | 1651.68            | 7046.32            | 7.617                          | 1352.02            | 10298.76           |
| A_68_P21278824 | chr2:63936695-63936739                            | NM_021716:-647     | Fign       | PROMOTER               | 1.799                                                        | 1.562                          | 572.22             | 893.92             | 2.810                          | 476.20             | 1338.03            |
| A_68_P24951566 | chr7:4966239-4966283                              | NM_011813:-405     | Fiz1       | PROMOTER               | 1.527                                                        | 1.489                          | 2233.90            | 3326.98            | 2.274                          | 1677.08            | 3813.57            |
| A_68_P31937108 | chr19:7054737-7054781                             | NM_008020:172      | Fkbp2      | INSIDE                 | 1.686                                                        | 3.435                          | 4409.51            | 15146.83           | 5.790                          | 3177.15            | 18395.36           |
| A_68_P31937111 | chr19:7054987-7055031                             | NM_001166368:-57   | Fkbp2      | PROMOTER               | 1.524                                                        | 1.910                          | 1073.69            | 2050.39            | 2.910                          | 831.21             | 2418.70            |
| A_68_P24839014 | chr6:128387845-128387889                          | NM_010219:783      | Fkbp4      | INSIDE                 | 2.034                                                        | 8.102                          | 3964.90            | 32121.93           | 16.475                         | 2576.69            | 42451.57           |
| A_68_P31122728 | chr17:28622553-28622597                           | NM_010220:483      | Fkbp5      | INSIDE                 | 1.844                                                        | 2.440                          | 266.10             | 649.29             | 4.499                          | 246.20             | 1107.77            |
| A_68_P24477003 | chr6:56781975-56782019                            | NM_012056:-56      | Fkbp9      | PROMOTER               | 2.117                                                        | 2.955                          | 752.71             | 2224.52            | 6.256                          | 588.64             | 3682.38            |
| A_68_P24326454 | chr6:29383341-29383385                            | NM_001081185:210   | Flnc       | INSIDE                 | 1.663                                                        | 1.445                          | 6320.78            | 9136.28            | 2.403                          | 4721.24            | 11346.29           |
| A_68_P31161104 | chr17:35960060-35960104                           | NM_008027:-219     | Flot1      | PROMOTER               | 1.769                                                        | 5.447                          | 1552.32            | 8455.38            | 9.634                          | 1231.80            | 11866.98           |
| A_68_P28656384 | chr12:96934105-96934150                           | NM_201518:3692     | Flrt2      | INSIDE                 | 1.584                                                        | 2.959                          | 1264.47            | 3741.34            | 4.687                          | 1024.72            | 4803.15            |
| A_68_P32441102 | chrX:65932146-65932191                            | NM_008031:439      | Fmr1       | INSIDE                 | 2.396                                                        | 4.896                          | 1079.66            | 5286.01            | 11.733                         | 634.73             | 7447.07            |
| A_68_P21107218 | chr2:30997212-30997256                            | NM_001038700:294   | Fnbp1      | INSIDE                 | 1.689                                                        | 2.193                          | 906.60             | 1988.37            | 3.704                          | 750.28             | 2778.80            |
| A_68_P22483661 | chr3:122321647-122321691                          | NM_001114665:917   | Fnbp11     | INSIDE                 | 1.844                                                        | 6.922                          | 969.79             | 6713.12            | 12.762                         | 832.67             | 10626.89           |

| ProbeName      | Target position of probe on CpG island microarray | TargetID            | GeneSymbol | CpG island Description | Ratio of relative methylation (TiO <sub>2</sub> -NP/Vehicle) | Sham group                     |                    |                    | TiO <sub>2</sub> -H group      |                    |                    |
|----------------|---------------------------------------------------|---------------------|------------|------------------------|--------------------------------------------------------------|--------------------------------|--------------------|--------------------|--------------------------------|--------------------|--------------------|
|                |                                                   |                     |            |                        |                                                              | Relative methylation (Cy5/Cy3) | Cy3 signal (Input) | Cy5 signal (MeDIP) | Relative methylation (Cy5/Cy3) | Cy3 signal (Input) | Cy5 signal (MeDIP) |
| A_68_P22483663 | chr3:122321938-122321982                          | NM_001114665:625    | Fnbp11     | INSIDE                 | 1.717                                                        | 5.718                          | 894.16             | 5113.21            | 9.819                          | 840.35             | 8251.31            |
| A_68_P29713892 | chr14:73109778-73109822                           | NM_207636:10        | Fndc3a     | INSIDE                 | 1.800                                                        | 3.666                          | 15386.09           | 56402.37           | 6.598                          | 12880.93           | 84987.90           |
| A_68_P29713891 | chr14:73109647-73109691                           | NM_207636:142       | Fndc3a     | INSIDE                 | 1.641                                                        | 3.333                          | 1249.16            | 4163.45            | 5.469                          | 1056.14            | 5776.46            |
| A_68_P29713894 | chr14:73110055-73110099                           | NM_207636:-266      | Fndc3a     | PROMOTER               | 1.613                                                        | 1.503                          | 3401.65            | 5113.89            | 2.425                          | 2664.88            | 6462.15            |
| A_68_P29713887 | chr14:73109166-73109210                           | NM_207636:622       | Fndc3a     | INSIDE                 | 1.547                                                        | 1.720                          | 371.99             | 639.79             | 2.661                          | 324.89             | 864.39             |
| A_68_P27810090 | chr11:54251929-54251973                           | NM_173753:270       | Fnip1      | INSIDE                 | 1.797                                                        | 3.055                          | 1965.54            | 6005.08            | 5.491                          | 1626.28            | 8930.19            |
| A_68_P28604394 | chr12:86827035-86827079                           | NM_010234:12206     | Fos        | DOWNSTREAM             | 1.887                                                        | 3.215                          | 1472.75            | 4735.17            | 6.066                          | 1107.98            | 6721.43            |
| A_68_P28463190 | chr12:58643591-58643635                           | NM_008259:3496      | Foxa1      | INSIDE                 | 1.560                                                        | 2.253                          | 1457.12            | 3283.00            | 3.514                          | 1177.59            | 4138.56            |
| A_68_P29257223 | chr13:99136439-99136483                           | NM_008242:12261     | Foxd1      | DOWNSTREAM             | 2.092                                                        | 8.661                          | 2174.59            | 18833.71           | 18.116                         | 1799.01            | 32590.48           |
| A_68_P23222249 | chr4:114580688-114580732                          | NM_008593:793       | Foxd2      | INSIDE                 | 2.427                                                        | 6.487                          | 1921.84            | 12467.91           | 15.742                         | 1486.86            | 23406.71           |
| A_68_P23222243 | chr4:114580052-114580096                          | NM_008593:1429      | Foxd2      | INSIDE                 | 1.514                                                        | 3.361                          | 1114.32            | 3744.93            | 5.088                          | 999.09             | 5082.91            |
| A_68_P23145563 | chr4:99324552-99324596                            | NM_010425:1585      | Foxd3      | INSIDE                 | 1.596                                                        | 1.997                          | 1989.00            | 3971.76            | 3.187                          | 1744.74            | 5559.83            |
| A_68_P23222359 | chr4:114597578-114597622                          | NM_015758:1018      | Foxe3      | DOWNSTREAM             | 1.895                                                        | 11.062                         | 1484.95            | 16425.86           | 20.962                         | 1203.20            | 25221.92           |
| A_68_P23222361 | chr4:114597756-114597800                          | NM_015758:840       | Foxe3      | INSIDE                 | 1.562                                                        | 2.049                          | 646.36             | 1324.62            | 3.200                          | 520.65             | 1666.31            |
| A_68_P24002947 | chr5:114723893-114723937                          | NM_148935:-144      | Foxn4      | PROMOTER               | 2.040                                                        | 1.930                          | 249.67             | 481.97             | 3.938                          | 173.95             | 684.94             |
| A_68_P27094083 | chr10:41996329-41996375                           | NM_019740:196       | Foxo3      | INSIDE                 | 1.730                                                        | 2.798                          | 733.02             | 2050.96            | 4.841                          | 674.74             | 3266.23            |
| A_68_P32563078 | chrX:98450245-98450289                            | NM_018789:400       | Foxo4      | INSIDE                 | 1.854                                                        | 2.398                          | 2878.19            | 6901.22            | 4.445                          | 1681.25            | 7473.24            |
| A_68_P23250319 | chr4:119941839-119941885                          | NM_194060:18004     | Foxo6      | INSIDE                 | 1.820                                                        | 3.106                          | 574.76             | 1785.39            | 5.655                          | 460.56             | 2604.27            |
| A_68_P23250457 | chr4:119959679-119959723                          | NM_194060:166       | Foxo6      | INSIDE                 | 1.669                                                        | 2.359                          | 676.94             | 1597.15            | 3.937                          | 600.87             | 2365.41            |
| A_68_P24683080 | chr6:98978547-98978591                            | NM_001197322:-276   | Foxp1      | PROMOTER               | 1.922                                                        | 1.899                          | 1475.64            | 2802.18            | 3.650                          | 1327.61            | 4846.05            |
| A_68_P31214913 | chr17:48046778-48046822                           | NM_001110824:14781  | Foxp4      | INSIDE                 | 2.054                                                        | 5.738                          | 6145.33            | 35262.75           | 11.786                         | 4375.44            | 51567.38           |
| A_68_P32117383 | chr19:41905096-41905140                           | NM_008043:659       | Frat1      | INSIDE                 | 1.590                                                        | 2.682                          | 1948.71            | 5227.13            | 4.264                          | 1756.91            | 7491.10            |
| A_68_P32117489 | chr19:41921912-41921956                           | NM_177603:688       | Frat2      | INSIDE                 | 1.795                                                        | 3.395                          | 963.77             | 3271.91            | 6.093                          | 735.76             | 4482.62            |
| A_68_P23018909 | chr4:73659645-73659689                            | NM_172869:160       | Frmf3      | INSIDE                 | 1.623                                                        | 1.485                          | 899.52             | 1335.79            | 2.410                          | 685.09             | 1650.77            |
| A_68_P20967784 | chr2:4322707-4322751                              | NM_001177843:707    | Frmf4a     | INSIDE                 | 1.734                                                        | 4.722                          | 12366.15           | 58388.60           | 8.189                          | 8550.72            | 70023.36           |
| A_68_P21582988 | chr2:121632726-121632770                          | NM_172673:45        | Frmf5      | INSIDE                 | 2.734                                                        | 8.279                          | 6123.14            | 50694.51           | 22.637                         | 3823.30            | 86547.30           |
| A_68_P32815030 | chrX:164561176-164561220                          | NM_001033330:453967 | Frmf4      | INSIDE                 | 1.866                                                        | 1.925                          | 4121.47            | 7933.14            | 3.592                          | 2105.63            | 7564.06            |
| A_68_P24154219 | chr5:143723667-143723712                          | NM_007984:1656      | Fsen1      | INSIDE                 | 1.784                                                        | 4.276                          | 1532.87            | 6554.20            | 7.628                          | 1125.17            | 8582.46            |
| A_68_P29346593 | chr13:115249654-115249698                         | NM_008046:-738      | Fst        | PROMOTER               | 1.606                                                        | 2.498                          | 3716.50            | 9282.35            | 4.010                          | 2635.06            | 10566.83           |
| A_68_P21109951 | chr2:31428059-31428103                            | NM_001033389:-164   | Fubp3      | PROMOTER               | 2.343                                                        | 13.413                         | 1326.63            | 17793.56           | 31.430                         | 941.46             | 29589.95           |
| A_68_P25266551 | chr7:87547096-87547140                            | NM_011046:530       | Furin      | INSIDE                 | 2.159                                                        | 12.930                         | 2107.76            | 27252.24           | 27.910                         | 1267.94            | 35387.98           |
| A_68_P25266552 | chr7:87547168-87547212                            | NM_011046:458       | Furin      | INSIDE                 | 1.907                                                        | 4.974                          | 1206.48            | 6001.21            | 9.487                          | 1020.22            | 9678.73            |
| A_68_P29448409 | chr14:21514700-21514744                           | NM_028428:533       | Fut11      | INSIDE                 | 1.569                                                        | 1.750                          | 974.29             | 1705.36            | 2.746                          | 895.85             | 2460.26            |
| A_68_P22045621 | chr3:33919264-33919308                            | NM_001113188:286    | Fxr1       | INSIDE                 | 1.872                                                        | 5.067                          | 1615.59            | 8186.84            | 9.487                          | 1389.21            | 13179.17           |
| A_68_P30655034 | chr16:32877951-32877995                           | NM_001159349:103    | Fytd1      | INSIDE                 | 1.683                                                        | 2.031                          | 1813.46            | 3682.82            | 3.417                          | 1446.40            | 4943.06            |
| A_68_P28080444 | chr11:102467782-102467826                         | NM_020510:2060      | Fzd2       | INSIDE                 | 2.002                                                        | 1.520                          | 598.43             | 909.33             | 3.043                          | 460.34             | 1400.67            |
| A_68_P20294265 | chr1:64784540-64784584                            | NM_001042659:-238   | Fzd5       | PROMOTER               | 1.987                                                        | 4.693                          | 1117.88            | 5245.69            | 9.322                          | 838.15             | 7813.62            |
| A_68_P31484539 | chr18:9212402-9212446                             | NM_008058:-429      | Fzd8       | PROMOTER               | 1.604                                                        | 2.193                          | 2083.27            | 4569.12            | 3.518                          | 1590.11            | 5594.11            |
| A_68_P31484544 | chr18:9212850-9212894                             | NM_008058:19        | Fzd8       | INSIDE                 | 1.565                                                        | 2.801                          | 892.40             | 2499.57            | 4.384                          | 806.66             | 3536.09            |
| A_68_P23892215 | chr5:92512150-92512194                            | NM_001080797:-229   | G3bp2      | PROMOTER               | 1.750                                                        | 2.949                          | 1937.02            | 5713.11            | 5.163                          | 1664.45            | 8593.41            |
| A_68_P23892217 | chr5:92512328-92512372                            | NM_001080797:-407   | G3bp2      | PROMOTER               | 1.693                                                        | 3.722                          | 2491.50            | 9273.63            | 6.300                          | 1946.07            | 12259.70           |
| A_68_P26001982 | chr8:83403879-83403923                            | NM_021356:478       | Gab1       | INSIDE                 | 1.515                                                        | 4.546                          | 3277.91            | 14899.97           | 6.888                          | 2505.41            | 17257.68           |
| A_68_P25348908 | chr7:104230293-104230337                          | NM_001162477:54     | Gab2       | INSIDE                 | 1.572                                                        | 2.820                          | 412.83             | 1164.28            | 4.434                          | 361.09             | 1600.99            |
| A_68_P26171007 | chr8:114465131-114465175                          | NM_026693:535       | Gabarap12  | INSIDE                 | 3.497                                                        | 27.141                         | 3597.79            | 97649.33           | 94.902                         | 1892.10            | 179564.50          |
| A_68_P23787605 | chr5:72049192-72049236                            | NM_010251:333       | Gabra4     | INSIDE                 | 1.882                                                        | 5.032                          | 905.66             | 4556.89            | 9.471                          | 750.11             | 7104.47            |
| A_68_P32457442 | chrX:69520267-69520311                            | NM_017369:-228      | Gabre      | PROMOTER               | 1.789                                                        | 4.370                          | 3001.36            | 13115.06           | 7.817                          | 2007.83            | 15694.92           |
| A_68_P27286394 | chr10:80391549-80391593                           | NM_008655:-1265     | Gadd45b    | PROMOTER               | 1.918                                                        | 1.815                          | 1699.65            | 3085.00            | 3.482                          | 1370.18            | 4771.14            |

| ProbeName      | Target position of probe on CpG island microarray | TargetID          | GeneSymbol | CpG island Description | Ratio of relative methylation (TiO <sub>2</sub> -NP/Vehicle) | Sham group                     |                    |                    | TiO <sub>2</sub> -H group      |                    |                    |
|----------------|---------------------------------------------------|-------------------|------------|------------------------|--------------------------------------------------------------|--------------------------------|--------------------|--------------------|--------------------------------|--------------------|--------------------|
|                |                                                   |                   |            |                        |                                                              | Relative methylation (Cy5/Cy3) | Cy3 signal (Input) | Cy5 signal (MeDIP) | Relative methylation (Cy5/Cy3) | Cy3 signal (Input) | Cy5 signal (MeDIP) |
| A_68_P29034741 | chr13:51941420-51941464                           | NM_011817:-601    | Gadd45g    | PROMOTER               | 1.607                                                        | 4.308                          | 2411.71            | 10388.75           | 6.924                          | 1861.97            | 12891.70           |
| A_68_P22892659 | chr4:47105046-47105090                            | NM_172693:244     | Galnt12    | INSIDE                 | 1.570                                                        | 4.111                          | 837.62             | 3443.52            | 6.453                          | 723.30             | 4667.16            |
| A_68_P31347831 | chr17:74059828-74059872                           | NM_027864:-59     | Galnt14    | PROMOTER               | 1.761                                                        | 2.701                          | 2475.44            | 6685.55            | 4.756                          | 1800.05            | 8561.73            |
| A_68_P27385039 | chr10:98569849-98569893                           | NM_015737:-898    | Galnt4     | PROMOTER               | 1.754                                                        | 2.881                          | 597.56             | 1721.78            | 5.053                          | 546.34             | 2760.79            |
| A_68_P27385041 | chr10:98569996-98570040                           | NM_015737:-750    | Galnt4     | PROMOTER               | 1.539                                                        | 1.907                          | 370.06             | 705.59             | 2.935                          | 285.70             | 838.51             |
| A_68_P25892520 | chr8:60131247-60131291                            | NM_001167981:584  | Galnt7     | INSIDE                 | 1.552                                                        | 2.796                          | 777.11             | 2172.51            | 4.339                          | 632.87             | 2746.20            |
| A_68_P23980413 | chr5:110973506-110973550                          | NM_198306:165     | Galnt9     | INSIDE                 | 2.313                                                        | 2.123                          | 903.04             | 1916.98            | 4.911                          | 837.52             | 4113.03            |
| A_68_P28576082 | chr12:81619771-81619815                           | NM_001081421:-184 | Galnt1     | PROMOTER               | 1.562                                                        | 2.629                          | 854.62             | 2246.53            | 4.105                          | 779.49             | 3200.03            |
| A_68_P28576090 | chr12:81620528-81620572                           | NM_001081421:574  | Galnt1     | INSIDE                 | 1.536                                                        | 2.152                          | 4793.87            | 10316.28           | 3.306                          | 3707.25            | 12255.35           |
| A_68_P30364007 | chr15:78873556-78873600                           | NM_015738:1264    | Galr3      | INSIDE                 | 1.525                                                        | 1.580                          | 1550.00            | 2449.54            | 2.410                          | 1295.18            | 3121.49            |
| A_68_P27561184 | chr11:4965305-4965349                             | NM_001190406:4    | Gas2l1     | INSIDE                 | 2.125                                                        | 7.670                          | 8270.87            | 63438.54           | 16.302                         | 5486.54            | 89440.16           |
| A_68_P24620345 | chr6:88147159-88147203                            | NM_008090:-1477   | Gata2      | PROMOTER               | 1.605                                                        | 1.930                          | 784.07             | 1513.35            | 3.097                          | 737.04             | 2282.76            |
| A_68_P24620367 | chr6:88149612-88149656                            | NM_008090:977     | Gata2      | INSIDE                 | 1.513                                                        | 1.864                          | 2081.20            | 3879.08            | 2.820                          | 1736.45            | 4897.60            |
| A_68_P24620361 | chr6:88149067-88149115                            | NM_008090:433     | Gata2      | INSIDE                 | 1.724                                                        | 1.904                          | 294.63             | 560.86             | 3.281                          | 247.73             | 812.77             |
| A_68_P20997431 | chr2:9796515-9796559                              | NM_008091:3691    | Gata3      | INSIDE                 | 1.569                                                        | 3.329                          | 5427.34            | 18065.56           | 5.224                          | 3876.76            | 20251.14           |
| A_68_P25949121 | chr8:72498323-72498367                            | NM_001113346:-62  | Gatad2a    | PROMOTER               | 1.685                                                        | 5.348                          | 4294.38            | 22967.53           | 9.012                          | 3393.33            | 30579.31           |
| A_68_P24111498 | chr5:134575433-134575477                          | NM_030719:-163    | Gatsl2     | PROMOTER               | 1.835                                                        | 4.963                          | 1362.28            | 6761.22            | 9.107                          | 1124.35            | 10239.46           |
| A_68_P27556422 | chr11:4118442-4118486                             | NM_028022:211     | Gatsl3     | INSIDE                 | 2.059                                                        | 7.708                          | 1310.88            | 10104.72           | 15.868                         | 1024.76            | 16260.78           |
| A_68_P30849196 | chr16:70314241-70314285                           | NM_028803:-69     | Gbe1       | PROMOTER               | 1.701                                                        | 2.303                          | 2485.26            | 5724.21            | 3.918                          | 1985.75            | 7780.62            |
| A_68_P20432927 | chr1:91819381-91819425                            | NM_010262:8349    | Gbx2       | DOWNSTREAM             | 2.570                                                        | 8.925                          | 4387.88            | 39160.32           | 22.935                         | 2276.94            | 52221.25           |
| A_68_P21270819 | chr2:62502267-62502311                            | NM_145523:-95     | Gca        | PROMOTER               | 1.525                                                        | 1.673                          | 2277.55            | 3809.24            | 2.551                          | 1855.99            | 4734.25            |
| A_68_P21568184 | chr2:118993532-118993576                          | NM_177157:31      | Gchfr      | INSIDE                 | 1.586                                                        | 3.148                          | 2843.34            | 8949.78            | 4.993                          | 2288.86            | 11428.31           |
| A_68_P26656177 | chr9:77602711-77602755                            | NM_010295:391     | Gclc       | INSIDE                 | 1.572                                                        | 0.426                          | 1277.34            | 544.15             | 0.670                          | 1078.63            | 722.15             |
| A_68_P29248566 | chr13:97695211-97695255                           | NM_001166065:589  | Gcnt4      | INSIDE                 | 1.650                                                        | 2.718                          | 538.77             | 1464.12            | 4.484                          | 429.38             | 1925.19            |
| A_68_P25459669 | chr7:125849289-125849333                          | NM_019580:-58     | Gde1       | DIVERGENT_PROMOTER     | 1.568                                                        | 2.848                          | 2463.48            | 7016.05            | 4.464                          | 2041.48            | 9114.14            |
| A_68_P25951144 | chr8:72854849-72854893                            | NM_008107:1207    | Gdf1       | INSIDE                 | 1.649                                                        | 4.300                          | 551.65             | 2372.07            | 7.090                          | 441.95             | 3133.45            |
| A_68_P29526837 | chr14:34736673-34736717                           | NM_145741:-78     | Gdf10      | PROMOTER               | 1.742                                                        | 2.152                          | 3153.19            | 6786.21            | 3.750                          | 2573.87            | 9651.14            |
| A_68_P22722447 | chr4:9771366-9771410                              | NM_013526:-130    | Gdf6       | PROMOTER               | 1.779                                                        | 2.585                          | 23523.29           | 60796.56           | 4.598                          | 16395.60           | 75387.85           |
| A_68_P28221329 | chr12:8309070-8309114                             | NM_013527:-332    | Gdf7       | PROMOTER               | 1.836                                                        | 2.722                          | 5774.15            | 15716.10           | 4.998                          | 4784.64            | 23914.52           |
| A_68_P29996479 | chr15:7760686-7760730                             | NM_010275:-302    | Gdnf       | PROMOTER               | 1.950                                                        | 9.773                          | 1415.04            | 13828.45           | 19.057                         | 1081.20            | 20604.19           |
| A_68_P29996481 | chr15:7760813-7760857                             | NM_010275:-176    | Gdnf       | PROMOTER               | 1.625                                                        | 3.802                          | 1226.00            | 4661.44            | 6.177                          | 960.25             | 5931.57            |
| A_68_P24994096 | chr7:20158742-20158786                            | NM_027189:-72     | Gemin7     | DIVERGENT_PROMOTER     | 1.558                                                        | 1.518                          | 990.39             | 1503.27            | 2.364                          | 942.86             | 2229.39            |
| A_68_P23968450 | chr5:108155208-108155253                          | NM_010278:-1867   | Gfi1       | PROMOTER               | 2.050                                                        | 3.755                          | 599.09             | 2249.65            | 7.697                          | 495.49             | 3813.81            |
| A_68_P29249638 | chr13:97907886-97907931                           | NM_177266:17      | Gfm2       | INSIDE                 | 2.057                                                        | 6.374                          | 600.32             | 3826.62            | 13.115                         | 435.69             | 5714.06            |
| A_68_P32213515 | chr19:58529618-58529662                           | NM_010279:-684    | Gfra1      | PROMOTER               | 1.748                                                        | 1.741                          | 4343.45            | 7562.41            | 3.044                          | 2798.64            | 8517.84            |
| A_68_P29703989 | chr14:71289781-71289825                           | NM_008115:-134    | Gfra2      | PROMOTER               | 1.666                                                        | 6.103                          | 2103.42            | 12836.84           | 10.165                         | 1664.63            | 16920.80           |
| A_68_P28154359 | chr11:115465196-115465240                         | NM_173048:2       | Gga3       | INSIDE                 | 1.774                                                        | 3.264                          | 732.95             | 2392.19            | 5.789                          | 639.72             | 3703.54            |
| A_68_P27980051 | chr11:84683596-84683640                           | NM_153144:622     | Ggnbp2     | INSIDE                 | 1.514                                                        | 2.029                          | 3310.52            | 6716.55            | 3.072                          | 2466.36            | 7576.01            |
| A_68_P21765995 | chr2:155340656-155340700                          | NM_144786:-96     | Ggt7       | DIVERGENT_PROMOTER     | 1.806                                                        | 2.951                          | 1077.94            | 3180.74            | 5.328                          | 842.32             | 4487.81            |
| A_68_P21765994 | chr2:155340501-155340545                          | NM_144786:60      | Ggt7       | INSIDE                 | 1.797                                                        | 1.723                          | 1515.62            | 2611.59            | 3.096                          | 1202.00            | 3721.77            |
| A_68_P29975444 | chr15:3533365-3533409                             | NM_010284:-156    | Ghr        | PROMOTER               | 1.920                                                        | 7.272                          | 941.81             | 6848.65            | 13.961                         | 869.39             | 12137.41           |
| A_68_P20417070 | chr1:89224090-89224134                            | NM_001110212:509  | Gigyf2     | INSIDE                 | 1.568                                                        | 2.784                          | 842.92             | 2346.29            | 4.365                          | 744.25             | 3248.54            |
| A_68_P24429118 | chr6:48692680-48692724                            | NM_008376:3657    | Gimap1     | INSIDE                 | 1.627                                                        | 6.458                          | 1090.95            | 7045.70            | 10.506                         | 940.90             | 9884.70            |
| A_68_P26221254 | chr8:123113358-123113402                          | NM_178856:-405    | Gins2      | PROMOTER               | 2.234                                                        | 8.182                          | 5236.56            | 42846.61           | 18.278                         | 3565.24            | 65164.01           |
| A_68_P26221250 | chr8:123112916-123112960                          | NM_178856:37      | Gins2      | INSIDE                 | 1.512                                                        | 1.444                          | 2567.51            | 3706.97            | 2.182                          | 2080.94            | 4541.31            |
| A_68_P32563826 | chrX:98580104-98580148                            | NM_008124:7451    | Gjb1       | INSIDE                 | 2.352                                                        | 3.539                          | 937.42             | 3317.78            | 8.324                          | 424.00             | 3529.44            |
| A_68_P26167383 | chr8:113783057-113783101                          | NM_009149:24      | Glg1       | INSIDE                 | 2.733                                                        | 6.404                          | 3079.88            | 19722.76           | 17.500                         | 1937.32            | 33903.41           |

| ProbeName      | Target position of probe on CpG island microarray | TargetID            | GeneSymbol | CpG island Description | Ratio of relative methylation (TiO <sub>2</sub> -NP/Vehicle) | Sham group                     |                    |                    | TiO <sub>2</sub> -H group      |                    |                    |
|----------------|---------------------------------------------------|---------------------|------------|------------------------|--------------------------------------------------------------|--------------------------------|--------------------|--------------------|--------------------------------|--------------------|--------------------|
|                |                                                   |                     |            |                        |                                                              | Relative methylation (Cy5/Cy3) | Cy3 signal (Input) | Cy5 signal (MeDIP) | Relative methylation (Cy5/Cy3) | Cy3 signal (Input) | Cy5 signal (MeDIP) |
| A_68_P20553865 | chr1:120734246-120734290                          | NM_001081125:215928 | Gli2       | INSIDE                 | 1.527                                                        | 2.576                          | 834.66             | 2150.49            | 3.933                          | 708.23             | 2785.64            |
| A_68_P28842022 | chr13:15555028-15555072                           | NM_008130:-205      | Gli3       | PROMOTER               | 2.065                                                        | 6.713                          | 2389.98            | 16043.20           | 13.862                         | 1884.57            | 26123.75           |
| A_68_P31135104 | chr17:30749389-30749433                           | NM_001113560:194    | Glo1       | INSIDE                 | 1.571                                                        | 4.088                          | 647.44             | 2646.58            | 6.422                          | 564.46             | 3624.90            |
| A_68_P31136610 | chr17:31038660-31038704                           | NM_021332:-129      | Glp1r      | PROMOTER               | 1.861                                                        | 3.103                          | 1597.84            | 4957.41            | 5.775                          | 1231.07            | 7109.74            |
| A_68_P22271218 | chr3:80717646-80717690                            | NM_010298:-122      | Glrh       | PROMOTER               | 1.707                                                        | 3.883                          | 2691.97            | 10453.05           | 6.627                          | 2172.05            | 14394.29           |
| A_68_P25957808 | chr8:74135004-74135048                            | NM_146211:104       | Glt25d1    | INSIDE                 | 1.546                                                        | 2.720                          | 1477.88            | 4019.96            | 4.206                          | 1203.59            | 5061.77            |
| A_68_P20720544 | chr1:154247140-154247184                          | NM_177756:166       | Glt25d2    | INSIDE                 | 1.829                                                        | 2.208                          | 4633.39            | 10228.90           | 4.038                          | 3755.72            | 15165.27           |
| A_68_P22299774 | chr3:85691661-85691705                            | NM_177130:-242      | Glt28d2    | PROMOTER               | 2.345                                                        | 6.115                          | 2137.83            | 13071.99           | 14.340                         | 1643.46            | 23567.60           |
| A_68_P24005520 | chr5:115141122-115141166                          | NM_019821:-200      | Gltp       | PROMOTER               | 1.861                                                        | 14.750                         | 2824.25            | 41658.07           | 27.452                         | 1892.70            | 51959.08           |
| A_68_P24005517 | chr5:115140712-115140756                          | NM_019821:210       | Gltp       | INSIDE                 | 1.746                                                        | 3.422                          | 3875.07            | 13262.26           | 5.977                          | 2524.78            | 15089.95           |
| A_68_P28771927 | chr12:118392576-118392621                         | NR_033538:-2856     | Gm10421    | PROMOTER               | 2.599                                                        | 4.131                          | 733.51             | 3030.00            | 10.736                         | 537.89             | 5774.98            |
| A_68_P30955189 | chr16:90144198-90144242                           | NR_033476:1739      | Gm10789    | INSIDE                 | 1.763                                                        | 6.303                          | 1076.13            | 6783.06            | 11.115                         | 799.09             | 8881.84            |
| A_68_P22737302 | chr4:12833974-12834018                            | NM_001171801:13     | Gm11818    | INSIDE                 | 2.209                                                        | 5.015                          | 1959.85            | 9827.78            | 11.076                         | 1368.52            | 15158.08           |
| A_68_P28058704 | chr11:98671394-98671438                           | NR_033551:-13       | Gm12359    | PROMOTER               | 1.656                                                        | 3.705                          | 8276.45            | 30660.92           | 6.135                          | 6485.89            | 39792.04           |
| A_68_P21438071 | chr2:93797315-93797359                            | NM_001145034:-79    | Gm13889    | PROMOTER               | 1.801                                                        | 2.816                          | 3220.82            | 9068.87            | 5.071                          | 2565.75            | 13010.32           |
| A_68_P21438069 | chr2:93797146-93797190                            | NM_001145034:89     | Gm13889    | INSIDE                 | 1.764                                                        | 3.176                          | 1991.48            | 6325.51            | 5.604                          | 1596.99            | 8949.92            |
| A_68_P29575892 | chr14:47000105-47000149                           | NR_037981:928       | Gm15217    | INSIDE                 | 1.787                                                        | 3.607                          | 2919.11            | 10529.17           | 6.446                          | 2186.72            | 14096.10           |
| A_68_P27845567 | chr11:60745252-60745296                           | NR_027800:95        | Gm16516    | INSIDE                 | 1.678                                                        | 3.036                          | 937.83             | 2847.45            | 5.094                          | 736.27             | 3750.27            |
| A_68_P28744403 | chr12:112723947-112723992                         | NM_001033248:65     | Gm266      | INSIDE                 | 1.784                                                        | 1.381                          | 2131.22            | 2942.41            | 2.463                          | 1768.10            | 4355.31            |
| A_68_P27813685 | chr11:54911498-54911542                           | NM_010299:34        | Gm2a       | INSIDE                 | 1.504                                                        | 4.655                          | 2755.36            | 12826.30           | 7.003                          | 2025.41            | 14183.33           |
| A_68_P25766302 | chr8:33994797-33994841                            | NM_001177589:65680  | Gm3985     | DOWNSTREAM             | 2.287                                                        | 9.404                          | 1069.61            | 10058.46           | 21.510                         | 750.44             | 16141.86           |
| A_68_P25766300 | chr8:33994475-33994519                            | NM_001177589:66002  | Gm3985     | DOWNSTREAM             | 1.894                                                        | 2.241                          | 608.52             | 1363.70            | 4.244                          | 521.65             | 2213.84            |
| A_68_P25362933 | chr7:106774200-106774244                          | NM_001195529:1391   | Gm4980     | INSIDE                 | 1.574                                                        | 1.983                          | 2380.55            | 4720.30            | 3.121                          | 1714.36            | 5350.31            |
| A_68_P20875118 | chr1:182262286-182262330                          | NR_003623:-1628     | Gm5069     | PROMOTER               | 1.665                                                        | 2.628                          | 2153.41            | 5658.70            | 4.375                          | 1699.26            | 7433.81            |
| A_68_P32571132 | chrX:100129205-100129249                          | NR_026596:336       | Gm5126     | INSIDE                 | 1.927                                                        | 2.774                          | 1584.24            | 4393.93            | 5.345                          | 859.88             | 4595.98            |
| A_68_P26587299 | chr9:65219825-65219869                            | NM_001111145:10980  | Gm514      | INSIDE                 | 1.625                                                        | 6.392                          | 4269.15            | 27288.57           | 10.385                         | 3395.63            | 35263.23           |
| A_68_P29751456 | chr14:79851782-79851826                           | NM_001034882:163    | Gm5465     | INSIDE                 | 1.555                                                        | 2.370                          | 3615.36            | 8570.06            | 3.685                          | 2881.89            | 10619.67           |
| A_68_P30080950 | chr15:25344237-25344281                           | NR_027376:312       | Gm5468     | INSIDE                 | 1.575                                                        | 2.606                          | 378.57             | 986.49             | 4.105                          | 368.66             | 1513.46            |
| A_68_P25661493 | chr8:12431257-12431301                            | NR_027975:45508     | Gm5607     | INSIDE                 | 1.839                                                        | 6.119                          | 16899.96           | 103403.30          | 11.255                         | 12229.55           | 137644.50          |
| A_68_P30720009 | chr16:44173533-44173577                           | NM_001029889:45     | Gm608      | INSIDE                 | 1.621                                                        | 3.061                          | 994.91             | 3045.29            | 4.961                          | 793.75             | 3937.64            |
| A_68_P21932364 | chr3:8463041-8463085                              | NR_033512:36        | Gm6194     | INSIDE                 | 2.110                                                        | 4.809                          | 7173.47            | 34497.75           | 10.146                         | 5470.79            | 55505.08           |
| A_68_P21932363 | chr3:8462950-8462994                              | NR_033512:126       | Gm6194     | INSIDE                 | 1.712                                                        | 4.894                          | 2868.01            | 14035.36           | 8.377                          | 2247.66            | 18829.32           |
| A_68_P30333008 | chr15:73670325-73670369                           | NM_001033365:-245   | Gm628      | PROMOTER               | 1.505                                                        | 1.455                          | 862.56             | 1255.19            | 2.189                          | 759.49             | 1662.90            |
| A_68_P21345223 | chr2:75497311-75497355                            | NR_033513:-14       | Gm6793     | PROMOTER               | 1.817                                                        | 3.214                          | 715.56             | 2299.70            | 5.840                          | 502.90             | 2936.75            |
| A_68_P30895867 | chr16:78376777-78376821                           | NR_002700:204       | Gm7334     | INSIDE                 | 1.756                                                        | 5.544                          | 4323.13            | 23966.56           | 9.736                          | 3610.15            | 35150.07           |
| A_68_P23644448 | chr5:43626040-43626084                            | NR_028417:531       | Gm7854     | INSIDE                 | 4.107                                                        | 0.491                          | 627.14             | 307.93             | 2.017                          | 723.63             | 1459.38            |
| A_68_P31162860 | chr17:36305369-36305413                           | NM_001081032:92     | Gm8909     | INSIDE                 | 1.755                                                        | 2.647                          | 5455.52            | 14440.49           | 4.646                          | 4867.99            | 22619.08           |
| A_68_P26891190 | chr9:122656383-122656427                          | NM_001199736:-59    | Gm9524     | PROMOTER               | 1.523                                                        | 7.913                          | 889.69             | 7039.99            | 12.054                         | 658.89             | 7942.60            |
| A_68_P26886028 | chr9:121766761-121766805                          | NM_001112668:-133   | Gm9790     | PROMOTER               | 2.363                                                        | 5.533                          | 4191.24            | 23188.72           | 13.072                         | 3175.11            | 41505.89           |
| A_68_P22323963 | chr3:90017329-90017373                            | NM_001190258:219    | Gm9846     | INSIDE                 | 2.068                                                        | 0.262                          | 1139.06            | 298.86             | 0.543                          | 1169.11            | 634.28             |
| A_68_P24611767 | chr6:86683275-86683319                            | NM_011818:76        | Gmcl1      | INSIDE                 | 1.831                                                        | 6.282                          | 6492.21            | 40784.11           | 11.502                         | 4673.24            | 53751.74           |
| A_68_P21909702 | chr2:181022305-181022349                          | NM_198169:345       | Gmeb2      | INSIDE                 | 1.815                                                        | 1.560                          | 1875.56            | 2926.55            | 2.832                          | 1427.15            | 4041.51            |
| A_68_P22410841 | chr3:107948966-107949010                          | NM_010306:44        | Gnai3      | INSIDE                 | 1.628                                                        | 3.286                          | 970.21             | 3187.70            | 5.350                          | 788.34             | 4217.64            |
| A_68_P31790105 | chr18:67293085-67293129                           | NM_010307:-373      | Gnal       | PROMOTER               | 1.562                                                        | 2.176                          | 769.95             | 1675.10            | 3.399                          | 684.73             | 2327.47            |
| A_68_P26073617 | chr8:96334994-96335038                            | NM_001113384:279    | Gnao1      | INSIDE                 | 1.843                                                        | 6.583                          | 10465.44           | 68894.13           | 12.130                         | 7446.55            | 90329.10           |
| A_68_P27253670 | chr10:74430232-74430276                           | NM_010311:279       | Gnaz       | INSIDE                 | 1.570                                                        | 1.802                          | 1266.85            | 2282.44            | 2.829                          | 1006.12            | 2846.54            |
| A_68_P27253669 | chr10:74430095-74430139                           | NM_010311:141       | Gnaz       | INSIDE                 | 1.529                                                        | 2.357                          | 789.78             | 1861.25            | 3.603                          | 726.43             | 2617.05            |

| ProbeName      | Target position of probe on CpG island microarray | TargetID           | GeneSymbol | CpG island Description | Ratio of relative methylation (TiO <sub>2</sub> -NP/Vehicle) | Sham group                     |                    |                    | TiO <sub>2</sub> -H group      |                    |                    |
|----------------|---------------------------------------------------|--------------------|------------|------------------------|--------------------------------------------------------------|--------------------------------|--------------------|--------------------|--------------------------------|--------------------|--------------------|
|                |                                                   |                    |            |                        |                                                              | Relative methylation (Cy5/Cy3) | Cy3 signal (Input) | Cy5 signal (MeDIP) | Relative methylation (Cy5/Cy3) | Cy3 signal (Input) | Cy5 signal (MeDIP) |
| A_68_P30580079 | chr16:18499124-18499168                           | NM_023120:183      | Gnb16      | INSIDE                 | 2.141                                                        | 2.844                          | 1859.81            | 5289.01            | 6.089                          | 1442.04            | 8781.04            |
| A_68_P26866698 | chr9:118416014-118416060                          | NM_018748:601      | Golga4     | INSIDE                 | 2.118                                                        | 11.798                         | 3642.19            | 42970.34           | 24.992                         | 2297.60            | 57421.75           |
| A_68_P28691644 | chr12:103707806-103707850                         | NM_013747:-291     | Golga5     | PROMOTER               | 1.726                                                        | 2.151                          | 1836.11            | 3949.73            | 3.712                          | 1527.76            | 5671.67            |
| A_68_P28691640 | chr12:103707382-103707426                         | NM_013747:-715     | Golga5     | PROMOTER               | 1.563                                                        | 6.121                          | 432.66             | 2648.22            | 9.568                          | 300.97             | 2879.67            |
| A_68_P24904258 | chr6:142336086-142336130                          | NM_025872:346      | Golt1b     | INSIDE                 | 1.734                                                        | 1.677                          | 823.66             | 1381.09            | 2.908                          | 721.84             | 2098.75            |
| A_68_P21315049 | chr2:70499932-70499976                            | NM_027352:389      | Gorasp2    | INSIDE                 | 1.645                                                        | 3.840                          | 509.53             | 1956.67            | 6.318                          | 440.59             | 2783.49            |
| A_68_P23318268 | chr4:133130953-133130997                          | NM_172876:315      | Gpatch3    | INSIDE                 | 1.519                                                        | 3.239                          | 1150.61            | 3726.47            | 4.921                          | 1036.16            | 5098.82            |
| A_68_P28080239 | chr11:102417477-102417521                         | NM_001159492:-26   | Gpatch8    | PROMOTER               | 2.229                                                        | 6.312                          | 7420.54            | 46836.99           | 14.069                         | 5185.46            | 72952.94           |
| A_68_P29329250 | chr13:112279384-112279428                         | NM_001122963:843   | Gpbbp1     | INSIDE                 | 2.680                                                        | 12.969                         | 18361.71           | 238134.20          | 34.760                         | 9847.22            | 342287.80          |
| A_68_P20451399 | chr1:94728353-94728397                            | NM_016696:112      | Gpc1       | INSIDE                 | 2.015                                                        | 7.014                          | 1900.79            | 13332.30           | 14.136                         | 1221.02            | 17260.24           |
| A_68_P20451406 | chr1:94729272-94729316                            | NM_016696:1032     | Gpc1       | INSIDE                 | 1.884                                                        | 4.338                          | 2033.27            | 8819.41            | 8.171                          | 1598.45            | 13060.72           |
| A_68_P32383369 | chrX:49967083-49967127                            | NM_016697:47       | Gpc3       | INSIDE                 | 2.146                                                        | 3.528                          | 4704.13            | 16596.20           | 7.570                          | 2240.78            | 16963.39           |
| A_68_P32380519 | chrX:49518713-49518757                            | NM_008150:-634     | Gpc4       | PROMOTER               | 2.000                                                        | 3.934                          | 2022.85            | 7957.44            | 7.869                          | 1423.61            | 11202.84           |
| A_68_P32380511 | chrX:49517673-49517717                            | NM_008150:406      | Gpc4       | INSIDE                 | 1.733                                                        | 3.289                          | 1340.52            | 4408.65            | 5.699                          | 855.74             | 4877.06            |
| A_68_P29928904 | chr14:117325550-117325594                         | NM_001079844:1036  | Gpc6       | INSIDE                 | 1.719                                                        | 2.874                          | 1535.27            | 4413.00            | 4.941                          | 1284.53            | 6347.51            |
| A_68_P26847149 | chr9:114843024-114843068                          | NM_175380:59       | Gpd11      | INSIDE                 | 2.074                                                        | 4.714                          | 2036.36            | 9598.68            | 9.776                          | 1631.58            | 15950.71           |
| A_68_P32805174 | chrX:162677268-162677312                          | NM_001177961:416   | Gpm6b      | INSIDE                 | 1.765                                                        | 1.759                          | 1334.09            | 2347.25            | 3.106                          | 749.12             | 2326.47            |
| A_68_P25736450 | chr8:28196606-28196651                            | NM_054044:316      | Gpr124     | INSIDE                 | 2.545                                                        | 10.594                         | 3452.96            | 36580.26           | 26.957                         | 2485.27            | 66994.82           |
| A_68_P23681258 | chr5:50449746-50449790                            | NM_133911:467      | Gpr125     | INSIDE                 | 1.910                                                        | 2.700                          | 4056.12            | 10949.92           | 5.155                          | 3147.75            | 16226.96           |
| A_68_P23681262 | chr5:50450445-50450489                            | NM_133911:-231     | Gpr125     | PROMOTER               | 1.757                                                        | 7.745                          | 1505.05            | 11656.69           | 13.611                         | 1198.64            | 16314.77           |
| A_68_P23681257 | chr5:50449672-50449716                            | NM_133911:541      | Gpr125     | INSIDE                 | 1.753                                                        | 3.106                          | 6380.11            | 19814.98           | 5.445                          | 5137.68            | 27974.89           |
| A_68_P31936825 | chr19:7016840-7016884                             | NM_001177361:78    | Gpr137     | INSIDE                 | 2.355                                                        | 1.625                          | 788.65             | 1281.49            | 3.826                          | 596.15             | 2280.83            |
| A_68_P29569514 | chr14:45839639-45839683                           | NM_027518:269      | Gpr137c    | INSIDE                 | 1.625                                                        | 4.403                          | 1455.02            | 6406.46            | 7.154                          | 1082.09            | 7741.07            |
| A_68_P22030511 | chr3:30755072-30755116                            | NM_001134385:223   | Gpr160     | INSIDE                 | 1.601                                                        | 4.571                          | 796.20             | 3639.25            | 7.317                          | 677.92             | 4960.23            |
| A_68_P21563665 | chr2:118199048-118199092                          | NM_201367:85       | Gpr176     | INSIDE                 | 1.661                                                        | 2.525                          | 975.61             | 2463.34            | 4.195                          | 758.84             | 3183.08            |
| A_68_P24863969 | chr6:134820135-134820179                          | NM_001167697:17721 | Gpr19      | INSIDE                 | 1.927                                                        | 4.853                          | 539.59             | 2618.65            | 9.351                          | 411.50             | 3847.75            |
| A_68_P20644877 | chr1:138156885-138156929                          | NM_001101516:544   | Gpr25      | INSIDE                 | 1.608                                                        | 1.686                          | 764.98             | 1289.80            | 2.712                          | 648.05             | 1757.37            |
| A_68_P23316365 | chr4:132768551-132768595                          | NM_008154:-121     | Gpr3       | DIVERGENT_PROMOTER     | 1.597                                                        | 4.311                          | 3132.85            | 13506.40           | 6.884                          | 2790.16            | 19208.65           |
| A_68_P32454735 | chrX:68917753-68917797                            | NM_010340:833      | Gpr50      | INSIDE                 | 1.609                                                        | 2.705                          | 1139.03            | 3080.77            | 4.352                          | 599.11             | 2607.06            |
| A_68_P26803570 | chr9:106367374-106367418                          | NM_001159652:875   | Gpr62      | INSIDE                 | 1.735                                                        | 4.565                          | 756.92             | 3455.63            | 7.923                          | 673.99             | 5340.17            |
| A_68_P28684687 | chr12:102146364-102146408                         | NM_001177674:-8652 | Gpr68      | PROMOTER               | 1.809                                                        | 3.695                          | 1650.80            | 6100.38            | 6.684                          | 1533.07            | 10246.92           |
| A_68_P22448215 | chr3:115955466-115955511                          | NM_022427:914      | Gpr88      | INSIDE                 | 1.726                                                        | 2.313                          | 6031.43            | 13952.53           | 3.992                          | 4318.84            | 17240.68           |
| A_68_P24864944 | chr6:135015833-135015878                          | NM_181444:176      | Gpre5a     | INSIDE                 | 2.010                                                        | 8.465                          | 1809.30            | 15316.48           | 17.014                         | 1441.62            | 24527.37           |
| A_68_P24486168 | chr6:59376435-59376479                            | NM_183183:-172     | Gprin3     | PROMOTER               | 1.660                                                        | 2.105                          | 1615.90            | 3401.38            | 3.494                          | 1375.65            | 4807.21            |
| A_68_P21077785 | chr2:26171010-26171055                            | NM_001199146:-20   | Gpsm1      | PROMOTER               | 1.666                                                        | 9.846                          | 2502.21            | 24637.89           | 16.405                         | 2243.11            | 36797.72           |
| A_68_P30490489 | chr15:101062456-101062514                         | NM_019518:7847     | Grasp      | INSIDE                 | 1.877                                                        | 9.892                          | 1964.82            | 19435.55           | 18.567                         | 1397.98            | 25956.94           |
| A_68_P30490425 | chr15:101054602-101054646                         | NM_019518:-13      | Grasp      | PROMOTER               | 1.830                                                        | 1.605                          | 841.61             | 1350.63            | 2.937                          | 635.77             | 1867.57            |
| A_68_P27594327 | chr11:11937393-11937437                           | NM_001177629:-9440 | Grb10      | PROMOTER               | 2.580                                                        | 7.830                          | 15526.51           | 121565.50          | 20.197                         | 11291.17           | 228048.70          |
| A_68_P21536555 | chr2:113598914-113598958                          | NM_011824:-131     | Grem1      | PROMOTER               | 1.910                                                        | 6.201                          | 10172.87           | 63086.12           | 11.843                         | 7495.12            | 88766.02           |
| A_68_P24501242 | chr6:63207663-63207707                            | NM_008167:834      | Grid2      | INSIDE                 | 1.577                                                        | 4.696                          | 1727.57            | 8111.93            | 7.405                          | 1561.71            | 11564.15           |
| A_68_P24156243 | chr5:144131687-144131731                          | NM_133355:6122     | Grid2ip    | INSIDE                 | 1.624                                                        | 1.924                          | 4737.74            | 9114.19            | 3.124                          | 4028.32            | 12585.02           |
| A_68_P27127187 | chr10:49502783-49502839                           | NM_001111268:5750  | Grik2      | INSIDE                 | 1.504                                                        | 2.794                          | 331.81             | 927.16             | 4.203                          | 255.99             | 1075.91            |
| A_68_P25007878 | chr7:25800603-25800647                            | NM_008168:56764    | Grik5      | INSIDE                 | 1.608                                                        | 4.820                          | 2215.50            | 10677.62           | 7.749                          | 1490.88            | 11552.75           |
| A_68_P30540368 | chr16:9995820-9995865                             | NM_008170:-3216    | Grin2a     | PROMOTER               | 2.085                                                        | 12.926                         | 6410.38            | 82858.78           | 26.947                         | 4763.33            | 128356.60          |
| A_68_P28152301 | chr11:115111293-115111337                         | NM_010350:17243    | Grin2c     | INSIDE                 | 1.855                                                        | 4.543                          | 821.35             | 3731.26            | 8.426                          | 625.37             | 5269.14            |
| A_68_P28152414 | chr11:115126813-115126857                         | NM_010350:1723     | Grin2c     | INSIDE                 | 1.504                                                        | 1.820                          | 7588.84            | 13811.37           | 2.738                          | 5649.71            | 15466.21           |
| A_68_P25095389 | chr7:53088549-53088593                            | NM_008172:33481    | Grin2d     | INSIDE                 | 1.835                                                        | 6.204                          | 1118.06            | 6936.44            | 11.385                         | 875.81             | 9971.39            |

| ProbeName      | Target position of probe on CpG island microarray | TargetID            | GeneSymbol    | CpG island Description | Ratio of relative methylation (TiO <sub>2</sub> -NP/Vehicle) | Sham group                     |                    |                    | TiO <sub>2</sub> -H group      |                    |                    |
|----------------|---------------------------------------------------|---------------------|---------------|------------------------|--------------------------------------------------------------|--------------------------------|--------------------|--------------------|--------------------------------|--------------------|--------------------|
|                |                                                   |                     |               |                        |                                                              | Relative methylation (Cy5/Cy3) | Cy3 signal (Input) | Cy5 signal (MeDIP) | Relative methylation (Cy5/Cy3) | Cy3 signal (Input) | Cy5 signal (MeDIP) |
| A_68_P26622301 | chr9:71333539-71333583                            | NM_001164793:-795   | Grin1a        | PROMOTER               | 1.980                                                        | 2.353                          | 1200.03            | 2824.26            | 4.660                          | 1053.28            | 4908.56            |
| A_68_P31116177 | chr17:27552104-27552148                           | NM_001013385:88123  | Grm4          | DOWNSTREAM             | 2.139                                                        | 12.359                         | 2346.81            | 29005.04           | 26.430                         | 1264.59            | 33423.64           |
| A_68_P25301151 | chr7:95278746-95278790                            | NM_001081414:546091 | Grm5          | INSIDE                 | 1.519                                                        | 2.111                          | 1277.37            | 2695.95            | 3.206                          | 1012.31            | 3245.16            |
| A_68_P26220483 | chr8:123012034-123012078                          | NM_198671:-709      | Gse1          | PROMOTER               | 1.762                                                        | 4.405                          | 1205.27            | 5309.66            | 7.762                          | 902.80             | 7007.95            |
| A_68_P26220480 | chr8:123011650-123011694                          | NM_198671:-1093     | Gse1          | PROMOTER               | 1.513                                                        | 2.779                          | 968.75             | 2692.41            | 4.206                          | 807.18             | 3395.13            |
| A_68_P26220858 | chr8:123061951-123061995                          | NM_001145896:664    | Gse1          | INSIDE                 | 1.510                                                        | 3.980                          | 1269.37            | 5052.43            | 6.011                          | 964.46             | 5796.91            |
| A_68_P25498532 | chr7:133225682-133225726                          | NM_001101488:221    | Gsg11         | INSIDE                 | 1.792                                                        | 5.769                          | 15276.74           | 88131.47           | 10.340                         | 11739.08           | 121378.90          |
| A_68_P25498529 | chr7:133225199-133225243                          | NM_001101488:705    | Gsg11         | INSIDE                 | 1.629                                                        | 1.489                          | 2851.67            | 4247.28            | 2.426                          | 2298.74            | 5577.07            |
| A_68_P30547082 | chr16:11253796-11253840                           | NM_001130008:600    | Gspt1         | INSIDE                 | 1.838                                                        | 1.881                          | 1209.07            | 2273.78            | 3.456                          | 1042.67            | 3603.49            |
| A_68_P32539664 | chrX:91881437-91881481                            | NM_008179:51        | Gspt2         | INSIDE                 | 1.728                                                        | 1.532                          | 1092.11            | 1672.96            | 2.647                          | 546.98             | 1447.80            |
| A_68_P25770033 | chr8:34764110-34764154                            | NM_010344:423       | Gsr           | INSIDE                 | 2.372                                                        | 5.357                          | 3869.14            | 20727.80           | 12.708                         | 3194.58            | 40595.16           |
| A_68_P24757354 | chr6:113026958-113027002                          | NR_027010:258       | Gt(ROSA)26Sor | INSIDE                 | 1.508                                                        | 2.265                          | 1639.14            | 3713.15            | 3.417                          | 1379.95            | 4714.75            |
| A_68_P24112574 | chr5:134790846-134790890                          | NM_001080746:-252   | Gtf2i         | PROMOTER               | 1.536                                                        | 2.895                          | 1190.75            | 3446.85            | 4.446                          | 1021.12            | 4539.79            |
| A_68_P25496222 | chr7:132850904-132850948                          | NM_207239:276       | Gtf3c1        | INSIDE                 | 1.634                                                        | 1.799                          | 3778.37            | 6797.00            | 2.940                          | 3048.35            | 8961.42            |
| A_68_P21093574 | chr2:28695671-28695715                            | NM_001166033:188    | Gtf3c4        | INSIDE                 | 1.831                                                        | 6.435                          | 1088.97            | 7007.60            | 11.785                         | 913.34             | 10763.79           |
| A_68_P27083091 | chr10:39977457-39977501                           | NM_026113:-7        | Gtf3c6        | PROMOTER               | 1.602                                                        | 3.173                          | 3397.42            | 10778.73           | 5.083                          | 2673.04            | 13586.99           |
| A_68_P30367927 | chr15:79521233-79521289                           | NM_013818:-65       | Gtbp1         | DIVERGENT_PROMOTER     | 1.613                                                        | 3.259                          | 2903.88            | 9462.94            | 5.255                          | 2416.36            | 12697.28           |
| A_68_P31205409 | chr17:46297933-46297979                           | NM_001145979:-24    | Gtbp2         | DIVERGENT_PROMOTER     | 1.761                                                        | 4.260                          | 3135.28            | 13356.36           | 7.504                          | 2415.30            | 18123.83           |
| A_68_P23977812 | chr5:110535984-110536028                          | NM_145147:1210      | Gtbp6         | INSIDE                 | 1.567                                                        | 2.103                          | 995.06             | 2092.77            | 3.295                          | 788.22             | 2597.31            |
| A_68_P23778454 | chr5:69948402-69948446                            | NM_172711:244       | Guf1          | INSIDE                 | 1.848                                                        | 11.820                         | 651.41             | 7699.92            | 21.844                         | 469.40             | 10253.48           |
| A_68_P32507212 | chrX:83022021-83022065                            | NM_008194:116       | Gyk           | INSIDE                 | 1.620                                                        | 5.178                          | 30351.68           | 157156.00          | 8.389                          | 20975.09           | 175956.90          |
| A_68_P30363898 | chr15:78858851-78858898                           | NM_008197:233       | H1f0          | INSIDE                 | 1.637                                                        | 1.917                          | 1289.33            | 2471.43            | 3.139                          | 1051.84            | 3301.42            |
| A_68_P30363892 | chr15:78858298-78858342                           | NM_008197:-321      | H1f0          | PROMOTER               | 1.697                                                        | 1.440                          | 972.76             | 1400.49            | 2.443                          | 844.95             | 2064.48            |
| A_68_P29059430 | chr13:56236999-56237043                           | NM_001159513:-109   | H2afy         | PROMOTER               | 1.727                                                        | 2.959                          | 648.32             | 1918.32            | 5.110                          | 510.41             | 2608.02            |
| A_68_P27182287 | chr10:61246439-61246483                           | NM_207000:152       | H2afy2        | INSIDE                 | 1.608                                                        | 3.190                          | 2241.58            | 7150.70            | 5.131                          | 1689.84            | 8670.31            |
| A_68_P31162404 | chr17:36221085-36221129                           | NM_008199:88        | H2-B1         | INSIDE                 | 1.904                                                        | 2.502                          | 2933.75            | 7341.23            | 4.765                          | 2115.03            | 10078.02           |
| A_68_P31158869 | chr17:35457566-35457610                           | NM_010390:86        | H2-Q1         | INSIDE                 | 2.218                                                        | 3.214                          | 2869.99            | 9224.70            | 7.128                          | 2234.57            | 15927.74           |
| A_68_P20877951 | chr1:182742690-182742734                          | NM_008210:1022      | H3f3a         | INSIDE                 | 1.879                                                        | 2.919                          | 2269.28            | 6623.75            | 5.485                          | 1821.43            | 9991.04            |
| A_68_P23403797 | chr4:149383165-149383209                          | NM_173371:-54       | H6pd          | PROMOTER               | 1.584                                                        | 6.988                          | 3001.40            | 20974.56           | 11.069                         | 2237.16            | 24763.46           |
| A_68_P27111732 | chr10:45297581-45297625                           | NM_172473:-32       | Hacc1         | PROMOTER               | 1.900                                                        | 2.556                          | 1049.71            | 2683.25            | 4.857                          | 871.12             | 4231.03            |
| A_68_P22531299 | chr3:130975017-130975061                          | NM_008212:-83       | Hadh          | PROMOTER               | 2.737                                                        | 10.628                         | 15469.42           | 164409.20          | 29.089                         | 9081.46            | 264171.40          |
| A_68_P27827804 | chr11:57650530-57650574                           | NM_008213:-4903     | Hand1         | PROMOTER               | 1.522                                                        | 2.081                          | 2280.25            | 4744.95            | 3.166                          | 1619.94            | 5128.94            |
| A_68_P22311352 | chr3:87826975-87827019                            | NM_022031:4437      | Hapl1n2       | INSIDE                 | 1.552                                                        | 1.404                          | 4589.08            | 6441.50            | 2.178                          | 3396.94            | 7399.58            |
| A_68_P21576252 | chr2:120435142-120435186                          | NM_025475:-7        | Haus2         | DIVERGENT_PROMOTER     | 2.082                                                        | 2.017                          | 670.15             | 1351.97            | 4.200                          | 563.13             | 2365.28            |
| A_68_P28334080 | chr12:32634604-32634648                           | NM_153198:774       | Hbp1          | INSIDE                 | 1.671                                                        | 4.411                          | 447.47             | 1973.84            | 7.371                          | 388.89             | 2866.41            |
| A_68_P28334082 | chr12:32634899-32634943                           | NM_153198:480       | Hbp1          | INSIDE                 | 1.721                                                        | 1.569                          | 1598.61            | 2508.49            | 2.700                          | 1307.28            | 3530.14            |
| A_68_P27278520 | chr10:79187527-79187571                           | NM_008226:8170      | Hcn2          | INSIDE                 | 2.081                                                        | 10.178                         | 1515.88            | 15429.29           | 21.186                         | 1116.24            | 23649.08           |
| A_68_P26550030 | chr9:58670732-58670776                            | NM_001081192:-564   | Hcn4          | PROMOTER               | 1.738                                                        | 2.314                          | 463.53             | 1072.60            | 4.022                          | 400.76             | 1611.96            |
| A_68_P23300612 | chr4:129816147-129816191                          | NM_001163027:-373   | Hcrr1         | PROMOTER               | 1.503                                                        | 1.713                          | 3407.08            | 5835.44            | 2.575                          | 2819.48            | 7260.01            |
| A_68_P26648623 | chr9:76171335-76171379                            | NM_198962:29        | Hcrr2         | INSIDE                 | 1.522                                                        | 2.097                          | 1253.70            | 2629.01            | 3.192                          | 1031.47            | 3292.40            |
| A_68_P31253727 | chr17:56219020-56219064                           | NM_008233:-37       | Hdgfrp2       | DIVERGENT_PROMOTER     | 1.691                                                        | 2.480                          | 1095.39            | 2716.84            | 4.194                          | 842.04             | 3531.18            |
| A_68_P25274817 | chr7:89079514-89079558                            | NM_013886:-191      | Hdgfrp3       | PROMOTER               | 2.116                                                        | 6.283                          | 3031.88            | 19048.71           | 13.295                         | 2230.02            | 29648.19           |
| A_68_P25274814 | chr7:89079181-89079225                            | NM_013886:143       | Hdgfrp3       | INSIDE                 | 1.515                                                        | 3.405                          | 2741.20            | 9335.16            | 5.161                          | 2297.83            | 11858.66           |
| A_68_P20455835 | chr1:95374821-95374865                            | NM_133808:543       | Hdlbp         | INSIDE                 | 2.286                                                        | 5.679                          | 1908.50            | 10839.24           | 12.985                         | 1421.38            | 18456.94           |
| A_68_P24133861 | chr5:139626021-139626065                          | NM_001081265:-134   | Heatr2        | PROMOTER               | 1.923                                                        | 5.203                          | 17869.78           | 92974.62           | 10.007                         | 11113.70           | 111213.60          |
| A_68_P26039225 | chr8:90661714-90661758                            | NM_172757:-47       | Heatr3        | PROMOTER               | 1.633                                                        | 2.504                          | 2413.44            | 6042.63            | 4.088                          | 2631.80            | 10757.83           |
| A_68_P28432636 | chr12:53071968-53072012                           | NM_177171:318       | Heatr5a       | INSIDE                 | 1.972                                                        | 2.436                          | 3384.93            | 8244.91            | 4.803                          | 2605.10            | 12511.36           |

| ProbeName      | Target position of probe on CpG island microarray | TargetID           | GeneSymbol | CpG island Description | Ratio of relative methylation (TiO <sub>2</sub> -NP/Vehicle) | Sham group                     |                    |                    | TiO <sub>2</sub> -H group      |                    |                    |
|----------------|---------------------------------------------------|--------------------|------------|------------------------|--------------------------------------------------------------|--------------------------------|--------------------|--------------------|--------------------------------|--------------------|--------------------|
|                |                                                   |                    |            |                        |                                                              | Relative methylation (Cy5/Cy3) | Cy3 signal (Input) | Cy5 signal (MeDIP) | Relative methylation (Cy5/Cy3) | Cy3 signal (Input) | Cy5 signal (MeDIP) |
| A_68_P30659187 | chr16:33684576-33684620                           | NM_175256:47       | Heg1       | INSIDE                 | 1.773                                                        | 6.285                          | 2971.27            | 18674.29           | 11.145                         | 2361.20            | 26314.81           |
| A_68_P23931499 | chr5:101227260-101227304                          | NM_001081107:337   | Helq       | INSIDE                 | 2.145                                                        | 2.896                          | 2065.63            | 5982.98            | 6.212                          | 1669.15            | 10368.86           |
| A_68_P26077217 | chr8:96910495-96910539                            | NM_022331:117      | Herpud1    | INSIDE                 | 1.689                                                        | 5.907                          | 2741.31            | 16193.24           | 9.979                          | 2088.27            | 20837.91           |
| A_68_P30639681 | chr16:30070804-30070848                           | NM_008235:5384     | Hes1       | DOWNSTREAM             | 1.515                                                        | 1.520                          | 4721.65            | 7178.51            | 2.303                          | 3831.89            | 8826.15            |
| A_68_P23416903 | chr4:151532635-151532679                          | NM_008236:-319     | Hes2       | DIVERGENT_PROMOTER     | 1.782                                                        | 2.676                          | 1085.29            | 2904.61            | 4.769                          | 811.53             | 3870.50            |
| A_68_P27893219 | chr11:68936458-68936502                           | NM_033041:2526     | Hes7       | INSIDE                 | 2.031                                                        | 4.211                          | 3734.43            | 15726.52           | 8.552                          | 2629.86            | 22489.56           |
| A_68_P28083428 | chr11:102977758-102977802                         | NM_138753:142      | Hexim1     | INSIDE                 | 1.594                                                        | 1.775                          | 3158.02            | 5605.34            | 2.830                          | 2549.73            | 7215.73            |
| A_68_P28083517 | chr11:102994122-102994166                         | NM_001130516:-508  | Hexim2     | PROMOTER               | 1.615                                                        | 3.255                          | 2038.59            | 6635.67            | 5.256                          | 1583.56            | 8323.43            |
| A_68_P27041764 | chr10:30562697-30562741                           | NM_013904:-129     | Hey2       | PROMOTER               | 1.654                                                        | 2.910                          | 517.85             | 1506.71            | 4.812                          | 446.11             | 2146.52            |
| A_68_P28184739 | chr11:120329033-120329077                         | NM_001159328:106   | Hgs        | INSIDE                 | 1.540                                                        | 1.893                          | 2172.26            | 4112.60            | 2.915                          | 1783.07            | 5197.83            |
| A_68_P32095553 | chr19:37509433-37509477                           | NM_008245:124      | Hhex       | INSIDE                 | 1.772                                                        | 3.525                          | 3556.33            | 12536.69           | 6.247                          | 2918.16            | 18228.33           |
| A_68_P22450560 | chr3:116365543-116365587                          | NM_008246:31       | Hiat1      | INSIDE                 | 2.258                                                        | 4.123                          | 1719.69            | 7090.76            | 9.309                          | 1240.40            | 11546.41           |
| A_68_P27924602 | chr11:74984051-74984095                           | NM_010430:-315     | Hic1       | DIVERGENT_PROMOTER     | 2.102                                                        | 5.021                          | 1961.59            | 9850.01            | 10.557                         | 1570.80            | 16583.45           |
| A_68_P27924590 | chr11:74982634-74982678                           | NM_001098203:-1002 | Hic1       | PROMOTER               | 1.631                                                        | 2.257                          | 1046.15            | 2361.43            | 3.682                          | 817.05             | 3008.34            |
| A_68_P30572653 | chr16:17233627-17233671                           | NM_178922:-31      | Hic2       | PROMOTER               | 1.601                                                        | 4.792                          | 2127.46            | 10194.96           | 7.674                          | 1775.80            | 13627.26           |
| A_68_P28540462 | chr12:75009562-75009606                           | NM_010431:731      | Hif1a      | INSIDE                 | 1.717                                                        | 3.450                          | 1890.74            | 6523.81            | 5.924                          | 1556.06            | 9217.74            |
| A_68_P32132967 | chr19:44637357-44637401                           | NM_176958:35       | Hif1an     | INSIDE                 | 1.540                                                        | 3.012                          | 677.07             | 2039.17            | 4.638                          | 597.35             | 2770.71            |
| A_68_P27040510 | chr10:30337995-30338039                           | NM_025798:156      | Hint3      | INSIDE                 | 1.962                                                        | 3.176                          | 1065.95            | 3384.99            | 6.229                          | 904.96             | 5637.29            |
| A_68_P24116580 | chr5:135964648-135964692                          | NM_146001:56322    | Hip1       | INSIDE                 | 2.140                                                        | 5.409                          | 3084.15            | 16682.53           | 11.576                         | 2262.33            | 26188.17           |
| A_68_P21489528 | chr2:104334070-104334114                          | NM_001145824:554   | Hipk3      | INSIDE                 | 1.703                                                        | 1.668                          | 1201.67            | 2004.36            | 2.840                          | 1086.32            | 3085.18            |
| A_68_P26954148 | chr10:13684931-13684975                           | NM_010437:-1232    | Hivep2     | PROMOTER               | 1.727                                                        | 4.565                          | 2223.13            | 10147.80           | 7.885                          | 1782.67            | 14056.88           |
| A_68_P26954155 | chr10:13685730-13685774                           | NM_010437:-432     | Hivep2     | PROMOTER               | 1.723                                                        | 4.479                          | 4379.25            | 19614.59           | 7.715                          | 3569.73            | 27541.79           |
| A_68_P26954150 | chr10:13685112-13685158                           | NM_010437:-1050    | Hivep2     | PROMOTER               | 1.567                                                        | 2.407                          | 1916.49            | 4612.93            | 3.773                          | 1407.57            | 5310.50            |
| A_68_P27185080 | chr10:61732562-61732606                           | NM_001146100:70585 | Hk1        | INSIDE                 | 2.269                                                        | 10.646                         | 2773.56            | 29527.97           | 24.158                         | 2096.18            | 50638.62           |
| A_68_P27185081 | chr10:61732662-61732706                           | NM_001146100:70485 | Hk1        | INSIDE                 | 1.940                                                        | 4.623                          | 1350.81            | 6244.16            | 8.967                          | 1020.86            | 9154.55            |
| A_68_P21978078 | chr3:19957968-19958012                            | NM_144959:180      | Hlrf       | INSIDE                 | 1.951                                                        | 4.988                          | 7603.38            | 37929.07           | 9.733                          | 5994.60            | 58346.11           |
| A_68_P20897125 | chr1:186551788-186551832                          | NM_008250:4562     | Hlx        | INSIDE                 | 1.687                                                        | 2.130                          | 1138.59            | 2425.27            | 3.593                          | 783.07             | 2813.61            |
| A_68_P27289055 | chr10:80813338-80813382                           | NM_001163166:-158  | Hmg20b     | DIVERGENT_PROMOTER     | 1.916                                                        | 3.014                          | 4739.46            | 14285.52           | 5.774                          | 3859.24            | 22283.48           |
| A_68_P27289029 | chr10:80809838-80809882                           | NM_001163165:3311  | Hmg20b     | INSIDE                 | 1.565                                                        | 7.179                          | 2823.24            | 20269.19           | 11.233                         | 1862.01            | 20916.80           |
| A_68_P31117105 | chr17:27693117-27693161                           | NM_001025427:-380  | Hmga1      | PROMOTER               | 2.385                                                        | 5.460                          | 803.42             | 4386.29            | 13.019                         | 638.81             | 8316.76            |
| A_68_P31117117 | chr17:27694485-27694529                           | NM_001166476:909   | Hmga1-rs1  | INSIDE                 | 1.935                                                        | 3.854                          | 4656.86            | 17945.86           | 7.456                          | 3396.56            | 25324.85           |
| A_68_P31117120 | chr17:27694784-27694828                           | NM_001166476:1209  | Hmga1-rs1  | INSIDE                 | 1.546                                                        | 1.715                          | 1484.34            | 2545.31            | 2.651                          | 1267.24            | 3358.95            |
| A_68_P27497678 | chr10:119913602-119913646                         | NM_010441:367      | Hmga2      | INSIDE                 | 2.027                                                        | 10.620                         | 1669.67            | 17732.25           | 21.526                         | 1108.46            | 23860.40           |
| A_68_P30991207 | chr16:96348653-96348697                           | NM_008251:658      | Hmgn1      | INSIDE                 | 1.968                                                        | 2.602                          | 5404.50            | 14060.23           | 5.121                          | 4000.73            | 20487.47           |
| A_68_P25971363 | chr8:77517838-77517882                            | NM_178017:259      | Hmgb4      | INSIDE                 | 1.504                                                        | 3.776                          | 1144.27            | 4320.45            | 5.679                          | 1081.27            | 6140.09            |
| A_68_P25528898 | chr7:138685827-138685871                          | NM_008257:-628     | Hmx3       | PROMOTER               | 1.521                                                        | 3.334                          | 310.68             | 1035.88            | 5.071                          | 297.74             | 1509.99            |
| A_68_P25528895 | chr7:138685558-138685602                          | NM_008257:-896     | Hmx3       | PROMOTER               | 1.515                                                        | 2.685                          | 721.58             | 1937.75            | 4.069                          | 630.15             | 2564.25            |
| A_68_P28153958 | chr11:115374907-115374951                         | NM_008258:756      | Hn1        | INSIDE                 | 2.126                                                        | 17.486                         | 989.68             | 17305.50           | 37.177                         | 683.54             | 25411.86           |
| A_68_P29071664 | chr13:58228883-58228927                           | NM_029872:1013     | Hnmpa0     | INSIDE                 | 1.504                                                        | 3.383                          | 2280.21            | 7714.19            | 5.090                          | 1800.45            | 9163.93            |
| A_68_P29604760 | chr14:52723420-52723464                           | NM_001170981:261   | Hnmpc      | INSIDE                 | 1.689                                                        | 2.918                          | 2786.63            | 8130.06            | 4.928                          | 2129.02            | 10490.78           |
| A_68_P23927140 | chr5:100408133-100408177                          | NM_001077265:-197  | Hnmpd      | PROMOTER               | 1.612                                                        | 1.778                          | 1719.81            | 3057.63            | 2.866                          | 1408.50            | 4036.58            |
| A_68_P24783935 | chr6:117857266-117857310                          | NM_001166428:-533  | Hnmpf      | PROMOTER               | 2.132                                                        | 4.289                          | 3396.15            | 14566.89           | 9.143                          | 2523.63            | 23072.58           |
| A_68_P24784010 | chr6:117867385-117867429                          | NM_001166427:95    | Hnmpf      | INSIDE                 | 2.009                                                        | 4.788                          | 2320.95            | 11113.62           | 9.618                          | 1897.26            | 18248.16           |
| A_68_P24784006 | chr6:117866996-117867040                          | NM_001166427:-293  | Hnmpf      | PROMOTER               | 1.815                                                        | 3.705                          | 2777.20            | 10289.67           | 6.726                          | 2018.60            | 13576.17           |
| A_68_P24783941 | chr6:117857819-117857863                          | NM_001166427:-9471 | Hnmpf      | PROMOTER               | 1.588                                                        | 6.228                          | 909.62             | 5664.78            | 9.888                          | 695.15             | 6873.69            |
| A_68_P27788199 | chr11:50190689-50190733                           | NM_021510:-510     | Hnmpb1     | PROMOTER               | 2.027                                                        | 5.389                          | 4503.43            | 24268.11           | 10.925                         | 3367.63            | 36792.22           |
| A_68_P27189032 | chr10:62486795-62486839                           | NM_001079824:-219  | Hnmpb3     | DIVERGENT_PROMOTER     | 1.508                                                        | 2.966                          | 1117.74            | 3315.50            | 4.472                          | 978.50             | 4376.19            |

| ProbeName      | Target position of probe on CpG island microarray | TargetID            | GeneSymbol | CpG island Description | Ratio of relative methylation (TiO <sub>2</sub> -NP/Vehicle) | Sham group                     |                    |                    | TiO <sub>2</sub> -H group      |                    |                    |
|----------------|---------------------------------------------------|---------------------|------------|------------------------|--------------------------------------------------------------|--------------------------------|--------------------|--------------------|--------------------------------|--------------------|--------------------|
|                |                                                   |                     |            |                        |                                                              | Relative methylation (Cy5/Cy3) | Cy3 signal (Input) | Cy5 signal (MeDIP) | Relative methylation (Cy5/Cy3) | Cy3 signal (Input) | Cy5 signal (MeDIP) |
| A_68_P25023658 | chr7:29594290-29594344                            | NM_177301:-1592     | Hnmp7      | PROMOTER               | 1.707                                                        | 4.797                          | 1710.77            | 8206.30            | 8.186                          | 1221.68            | 10000.86           |
| A_68_P31150132 | chr17:33822462-33822506                           | NM_001109913:-81    | Hnmpm      | PROMOTER               | 1.528                                                        | 3.972                          | 1968.27            | 7818.47            | 6.071                          | 1520.49            | 9230.34            |
| A_68_P20863428 | chr1:180267506-180267550                          | NM_016805:387       | Hnmpu      | INSIDE                 | 1.530                                                        | 1.492                          | 616.38             | 919.53             | 2.283                          | 550.33             | 1256.38            |
| A_68_P23927384 | chr5:100467950-100467994                          | NM_016690:269       | Hnrpd1     | INSIDE                 | 2.275                                                        | 5.958                          | 5826.38            | 34711.57           | 13.556                         | 4005.52            | 54299.33           |
| A_68_P23927386 | chr5:100468112-100468156                          | NM_016690:107       | Hnrpd1     | INSIDE                 | 1.525                                                        | 1.347                          | 2453.41            | 3303.61            | 2.053                          | 2090.79            | 4292.30            |
| A_68_P31381048 | chr17:80461571-80461615                           | NM_144802:82        | Hnrpl1     | INSIDE                 | 1.615                                                        | 1.950                          | 1829.96            | 3569.05            | 3.150                          | 1467.27            | 4621.90            |
| A_68_P29614701 | chr14:55482992-55483036                           | NM_001177705:-19    | Homez      | PROMOTER               | 1.967                                                        | 3.067                          | 3193.56            | 9795.99            | 6.033                          | 2541.20            | 15329.78           |
| A_68_P25730819 | chr8:27229628-27229672                            | NM_207659:46        | Hook3      | INSIDE                 | 1.613                                                        | 2.939                          | 1362.79            | 4005.67            | 4.742                          | 1111.00            | 5268.23            |
| A_68_P24449298 | chr6:52184077-52184121                            | NM_008263:840       | Hoxa10     | INSIDE                 | 1.716                                                        | 5.558                          | 1152.59            | 6405.71            | 9.538                          | 928.05             | 8852.16            |
| A_68_P24449403 | chr6:52196333-52196377                            | NM_010450:-588      | Hoxa11     | PROMOTER               | 1.582                                                        | 2.100                          | 1809.28            | 3799.64            | 3.323                          | 1412.21            | 4692.87            |
| A_68_P24449533 | chr6:52211079-52211123                            | NM_008264:-226      | Hoxa13     | PROMOTER               | 2.290                                                        | 6.551                          | 2969.10            | 19450.39           | 15.000                         | 2271.12            | 34065.81           |
| A_68_P24449528 | chr6:52210288-52210332                            | NM_008264:564       | Hoxa13     | INSIDE                 | 1.753                                                        | 7.221                          | 591.44             | 4270.79            | 12.660                         | 478.78             | 6061.55            |
| A_68_P24448786 | chr6:52122729-52122773                            | NM_010452:40316     | Hoxa3      | INSIDE                 | 1.949                                                        | 3.590                          | 2816.44            | 10111.45           | 6.999                          | 2194.43            | 15358.72           |
| A_68_P24449229 | chr6:52175914-52175958                            | NM_010456:1433      | Hoxa9      | INSIDE                 | 1.798                                                        | 1.819                          | 1546.09            | 2811.78            | 3.269                          | 1279.83            | 4184.40            |
| A_68_P28043617 | chr11:96166483-96166527                           | NM_008268:1679      | Hoxb5      | INSIDE                 | 2.377                                                        | 2.543                          | 7392.87            | 18798.29           | 6.045                          | 5490.85            | 33193.03           |
| A_68_P28043336 | chr11:96132754-96132798                           | NM_008270:133       | Hoxb9      | INSIDE                 | 1.762                                                        | 2.702                          | 1478.87            | 3996.34            | 4.761                          | 1167.08            | 5556.00            |
| A_68_P30500966 | chr15:102785392-102785436                         | NM_00102484:458     | Hoxc11     | INSIDE                 | 1.680                                                        | 1.528                          | 651.42             | 995.66             | 2.568                          | 617.42             | 1585.58            |
| A_68_P30500682 | chr15:102752309-102752353                         | NM_010464:769       | Hoxc13     | INSIDE                 | 1.950                                                        | 2.090                          | 437.20             | 913.94             | 4.076                          | 393.05             | 1601.97            |
| A_68_P21339341 | chr2:74591156-74591200                            | NM_010467:-9858     | Hoxd1      | PROMOTER               | 1.830                                                        | 4.738                          | 3235.33            | 15329.05           | 8.673                          | 2385.13            | 20685.77           |
| A_68_P21339417 | chr2:74601653-74601697                            | NM_010467:638       | Hoxd1      | INSIDE                 | 1.542                                                        | 2.014                          | 1822.69            | 3670.23            | 3.104                          | 1498.07            | 4650.35            |
| A_68_P21339240 | chr2:74578542-74578586                            | NM_010468:28515     | Hoxd3      | INSIDE                 | 1.809                                                        | 2.036                          | 1647.74            | 3355.21            | 3.683                          | 1258.03            | 4633.65            |
| A_68_P21339006 | chr2:74550322-74550366                            | NM_010468:295       | Hoxd3      | INSIDE                 | 1.619                                                        | 2.232                          | 1636.44            | 3653.03            | 3.613                          | 1498.00            | 5412.55            |
| A_68_P21338948 | chr2:74542744-74542788                            | NM_008276:-779      | Hoxd8      | PROMOTER               | 2.077                                                        | 4.821                          | 1280.62            | 6174.19            | 10.013                         | 960.79             | 9620.80            |
| A_68_P23344531 | chr4:137772915-137772959                          | NM_001122897:-109   | Hpl1bp3    | PROMOTER               | 2.169                                                        | 16.862                         | 7205.96            | 121509.40          | 36.582                         | 4534.79            | 165892.40          |
| A_68_P23295046 | chr4:128798355-128798400                          | NM_010471:158       | Hpea       | INSIDE                 | 1.501                                                        | 5.295                          | 891.80             | 4722.32            | 7.947                          | 799.18             | 6350.88            |
| A_68_P23295047 | chr4:128798459-128798503                          | NM_010471:55        | Hpea       | INSIDE                 | 1.541                                                        | 1.416                          | 875.12             | 1239.51            | 2.183                          | 803.08             | 1753.03            |
| A_68_P23261234 | chr4:122866488-122866532                          | NM_174998:5764      | Hpcal4     | INSIDE                 | 1.844                                                        | 7.354                          | 10025.79           | 73731.62           | 13.561                         | 6913.90            | 93759.12           |
| A_68_P23261233 | chr4:122866390-122866434                          | NM_174998:5666      | Hpcal4     | INSIDE                 | 1.647                                                        | 2.404                          | 598.81             | 1439.31            | 3.959                          | 475.29             | 1881.44            |
| A_68_P23261232 | chr4:122866227-122866271                          | NM_174998:5502      | Hpcal4     | INSIDE                 | 1.562                                                        | 3.900                          | 3399.56            | 13256.62           | 6.092                          | 2528.50            | 15404.63           |
| A_68_P32385147 | chrX:50341550-50341594                            | NM_013556:318       | Hprt       | INSIDE                 | 2.451                                                        | 3.348                          | 1957.19            | 6553.16            | 8.208                          | 1013.19            | 8316.29            |
| A_68_P32385145 | chrX:50341393-50341437                            | NM_013556:160       | Hprt       | INSIDE                 | 1.713                                                        | 5.394                          | 1232.71            | 6648.69            | 9.240                          | 713.22             | 6590.19            |
| A_68_P29702031 | chr14:70953904-70953948                           | NM_021877:64        | Hr         | INSIDE                 | 1.562                                                        | 1.626                          | 6204.00            | 10086.09           | 2.539                          | 4768.71            | 12108.55           |
| A_68_P29048046 | chr13:54287380-54287425                           | NM_008286:-95       | Hrh2       | PROMOTER               | 1.521                                                        | 2.939                          | 1503.11            | 4418.07            | 4.470                          | 943.46             | 4217.09            |
| A_68_P24025038 | chr5:118620106-118620150                          | NM_007545:356       | Hrk        | INSIDE                 | 1.566                                                        | 2.149                          | 1563.84            | 3361.45            | 3.366                          | 1428.17            | 4806.89            |
| A_68_P25474216 | chr7:128643864-128643910                          | NM_001081327:108077 | Hs3st2     | INSIDE                 | 1.721                                                        | 7.977                          | 1898.20            | 15141.20           | 13.728                         | 1434.35            | 19691.47           |
| A_68_P27862290 | chr11:63734698-63734742                           | NM_018805:1066      | Hs3st3b1   | INSIDE                 | 2.430                                                        | 7.416                          | 3406.97            | 25266.90           | 18.019                         | 2541.56            | 45797.47           |
| A_68_P27862275 | chr11:63732951-63732995                           | NM_018805:2814      | Hs3st3b1   | INSIDE                 | 1.625                                                        | 4.099                          | 641.44             | 2629.45            | 6.661                          | 508.06             | 3384.07            |
| A_68_P27065106 | chr10:36226802-36226846                           | NM_001081208:212    | Hs3st5     | INSIDE                 | 1.660                                                        | 1.708                          | 1289.14            | 2202.06            | 2.836                          | 1048.96            | 2974.51            |
| A_68_P20146150 | chr1:36125563-36125607                            | NM_015818:340       | Hs6st1     | INSIDE                 | 1.638                                                        | 4.027                          | 2473.98            | 9963.62            | 6.599                          | 2193.65            | 14474.81           |
| A_68_P32378028 | chrX:49034553-49034597                            | NM_015819:-920      | Hs6st2     | PROMOTER               | 1.818                                                        | 2.100                          | 1353.54            | 2842.92            | 3.817                          | 739.84             | 2824.33            |
| A_68_P27995284 | chr11:87452873-87452917                           | NM_001045527:22229  | Hsf5       | INSIDE                 | 1.658                                                        | 5.403                          | 2219.32            | 11991.18           | 8.961                          | 1829.83            | 16397.01           |
| A_68_P27995147 | chr11:87430388-87430432                           | NM_001045527:-255   | Hsf5       | PROMOTER               | 1.519                                                        | 4.025                          | 862.35             | 3470.63            | 6.115                          | 735.11             | 4494.96            |
| A_68_P28739824 | chr12:111934703-111934747                         | NM_010480:-119      | Hsp90aa1   | PROMOTER               | 1.917                                                        | 11.944                         | 1915.98            | 22884.25           | 22.896                         | 1402.99            | 32122.28           |
| A_68_P28553818 | chr12:77505144-77505188                           | NM_008301:-190      | Hspa2      | PROMOTER               | 1.502                                                        | 3.614                          | 2028.44            | 7330.59            | 5.430                          | 1623.90            | 8817.36            |
| A_68_P27804074 | chr11:53113101-53113145                           | NM_008300:859       | Hspa4      | INSIDE                 | 1.982                                                        | 3.316                          | 6412.82            | 21267.40           | 6.574                          | 5187.91            | 34105.70           |
| A_68_P22081218 | chr3:40549756-40549800                            | NM_011020:244       | Hspa4l     | INSIDE                 | 1.701                                                        | 3.647                          | 627.09             | 2287.30            | 6.203                          | 700.15             | 4342.90            |
| A_68_P22081210 | chr3:40548895-40548939                            | NM_011020:-618      | Hspa4l     | PROMOTER               | 1.674                                                        | 3.368                          | 1544.20            | 5200.55            | 5.638                          | 1142.24            | 6439.66            |



| ProbeName      | Target position of probe on CpG island microarray | TargetID           | GeneSymbol | CpG island Description | Ratio of relative methylation (TiO <sub>2</sub> -NP/Vehicle) | Sham group                     |                    |                    | TiO <sub>2</sub> -H group      |                    |                    |
|----------------|---------------------------------------------------|--------------------|------------|------------------------|--------------------------------------------------------------|--------------------------------|--------------------|--------------------|--------------------------------|--------------------|--------------------|
|                |                                                   |                    |            |                        |                                                              | Relative methylation (Cy5/Cy3) | Cy3 signal (Input) | Cy5 signal (MeDIP) | Relative methylation (Cy5/Cy3) | Cy3 signal (Input) | Cy5 signal (MeDIP) |
| A_68_P20240346 | chr1:55145446-55145490                            | NM_008303:477      | Hspe1      | INSIDE                 | 1.976                                                        | 4.193                          | 1419.21            | 5951.07            | 8.284                          | 985.84             | 8167.04            |
| A_68_P23339951 | chr4:137024980-137025024                          | NM_008305:285      | Hspg2      | INSIDE                 | 1.676                                                        | 1.544                          | 880.05             | 1359.16            | 2.588                          | 737.14             | 1907.69            |
| A_68_P25252511 | chr7:138079707-138079751                          | NM_019564:12       | Htra1      | INSIDE                 | 1.505                                                        | 1.501                          | 3874.53            | 5817.41            | 2.260                          | 3128.33            | 7070.53            |
| A_68_P23602238 | chr5:36022053-36022097                            | NM_030127:357      | Htra3      | INSIDE                 | 1.620                                                        | 5.000                          | 2167.98            | 10840.38           | 8.098                          | 1422.78            | 11521.52           |
| A_68_P26345150 | chr9:20836502-20836546                            | NM_008319:43       | Icam5      | INSIDE                 | 1.982                                                        | 4.277                          | 4438.10            | 18981.33           | 8.477                          | 3506.13            | 29722.46           |
| A_68_P26658192 | chr9:77961262-77961306                            | NM_019987:240      | Ick        | INSIDE                 | 2.003                                                        | 10.295                         | 19505.51           | 200801.00          | 20.621                         | 11145.86           | 229837.30          |
| A_68_P28153287 | chr11:115264936-115264980                         | NM_026729:-121     | Ict1       | PROMOTER               | 1.692                                                        | 2.679                          | 1149.83            | 3080.74            | 4.535                          | 929.72             | 4216.00            |
| A_68_P28293506 | chr12:25781121-25781165                           | NM_010496:-185     | Id2        | PROMOTER               | 1.559                                                        | 2.315                          | 4038.43            | 9349.15            | 3.609                          | 3161.10            | 11406.85           |
| A_68_P23332310 | chr4:135700553-135700600                          | NM_008321:840      | Id3        | INSIDE                 | 2.111                                                        | 4.020                          | 265.91             | 1068.88            | 8.487                          | 194.28             | 1648.92            |
| A_68_P25264893 | chr7:87260180-87260224                            | NM_173011:34       | Idh2       | INSIDE                 | 2.001                                                        | 5.771                          | 760.03             | 4386.16            | 11.547                         | 694.19             | 8015.83            |
| A_68_P21103442 | chr2:30328841-30328885                            | NM_030244:857      | Ier5l      | INSIDE                 | 2.152                                                        | 11.581                         | 3520.79            | 40775.03           | 24.925                         | 2959.60            | 73769.32           |
| A_68_P30963193 | chr16:91485518-91485562                           | NM_010508:81       | Ifnar1     | INSIDE                 | 1.633                                                        | 1.748                          | 1050.16            | 1835.82            | 2.855                          | 791.62             | 2260.23            |
| A_68_P28041915 | chr11:95866931-95866976                           | NM_009951:305      | Igf2bp1    | INSIDE                 | 2.608                                                        | 8.882                          | 6026.23            | 53526.77           | 23.168                         | 4126.34            | 95599.91           |
| A_68_P30596436 | chr16:22163233-22163277                           | NM_183029:118      | Igf2bp2    | INSIDE                 | 2.303                                                        | 7.747                          | 847.67             | 6567.12            | 17.840                         | 768.85             | 13716.50           |
| A_68_P30596432 | chr16:22162719-22162763                           | NM_183029:632      | Igf2bp2    | INSIDE                 | 1.655                                                        | 5.012                          | 979.30             | 4907.86            | 8.295                          | 862.69             | 7155.78            |
| A_68_P28060084 | chr11:98902871-98902915                           | NM_010517:319      | Igfbp4     | INSIDE                 | 1.505                                                        | 1.812                          | 1193.02            | 2161.77            | 2.726                          | 1051.81            | 2867.48            |
| A_68_P26375208 | chr9:27107222-27107266                            | NM_00103323:432    | Igsf9b     | INSIDE                 | 1.771                                                        | 11.717                         | 1501.62            | 17594.76           | 20.756                         | 1142.28            | 23708.96           |
| A_68_P20351513 | chr1:74998432-74998476                            | NM_010544:-229     | Ihh        | PROMOTER               | 1.828                                                        | 1.985                          | 2593.05            | 5147.28            | 3.629                          | 2305.65            | 8366.79            |
| A_68_P27591949 | chr11:11585605-11585649                           | NM_001025597:-589  | Ikzf1      | PROMOTER               | 1.971                                                        | 6.461                          | 328.40             | 2121.91            | 12.737                         | 332.67             | 4237.04            |
| A_68_P27542462 | chr10:128082827-128082871                         | NM_011772:201      | Ikzf4      | INSIDE                 | 2.014                                                        | 6.594                          | 3300.43            | 21761.88           | 13.277                         | 2547.16            | 33818.33           |
| A_68_P20170470 | chr1:40323556-40323600                            | NM_001123382:148   | Il1r1      | INSIDE                 | 2.563                                                        | 9.463                          | 1749.87            | 16559.53           | 24.254                         | 1125.93            | 27308.32           |
| A_68_P30621546 | chr16:26581967-26582011                           | NM_134103:198      | Il1rap     | INSIDE                 | 1.639                                                        | 5.035                          | 2098.47            | 10565.95           | 8.251                          | 1560.42            | 12874.40           |
| A_68_P25089584 | chr7:52095285-52095329                            | NM_010215:3649     | Il4i1      | INSIDE                 | 1.751                                                        | 2.596                          | 1830.05            | 4751.35            | 4.547                          | 1424.35            | 6476.19            |
| A_68_P25495415 | chr7:132725071-132725115                          | NM_001008700:29297 | Il4ra      | DOWNSTREAM             | 1.745                                                        | 4.300                          | 3635.17            | 15632.42           | 7.503                          | 2918.89            | 21900.68           |
| A_68_P29334871 | chr13:113254322-113254366                         | NM_010560:67       | Il6st      | INSIDE                 | 1.652                                                        | 5.429                          | 2889.77            | 15688.11           | 8.970                          | 2431.44            | 21808.93           |
| A_68_P22325451 | chr3:90280267-90280311                            | NM_026374:166      | Ilf2       | INSIDE                 | 1.583                                                        | 4.404                          | 4144.81            | 18254.36           | 6.971                          | 3183.87            | 22195.81           |
| A_68_P23138267 | chr4:98062517-98062561                            | NM_001005784:22    | Inadl      | INSIDE                 | 1.588                                                        | 4.487                          | 849.63             | 3811.95            | 7.127                          | 762.97             | 5437.57            |
| A_68_P28751168 | chr12:113838436-113838480                         | NM_198411:11464    | Inf2       | INSIDE                 | 1.582                                                        | 3.465                          | 1310.26            | 4540.69            | 5.484                          | 1032.55            | 5662.21            |
| A_68_P25656224 | chr8:11557705-11557749                            | NM_011919:1661     | Ing1       | INSIDE                 | 1.608                                                        | 5.077                          | 2794.35            | 14186.40           | 8.162                          | 2248.83            | 18355.30           |
| A_68_P25842954 | chr8:48761152-48761196                            | NM_023503:-661     | Ing2       | PROMOTER               | 1.618                                                        | 3.119                          | 729.58             | 2275.67            | 5.047                          | 620.16             | 3130.17            |
| A_68_P24288408 | chr6:21900000-21900044                            | NM_023626:408      | Ing3       | INSIDE                 | 1.658                                                        | 3.477                          | 6884.72            | 23938.05           | 5.766                          | 4668.75            | 26919.52           |
| A_68_P20457532 | chr1:95700895-95700939                            | NM_025454:375      | Ing5       | INSIDE                 | 2.724                                                        | 6.716                          | 2820.91            | 18944.70           | 18.295                         | 1637.99            | 29967.65           |
| A_68_P20457529 | chr1:95700443-95700487                            | NM_025454:-77      | Ing5       | DIVERGENT_PROMOTER     | 2.133                                                        | 9.915                          | 5255.68            | 52111.82           | 21.145                         | 2649.65            | 56025.88           |
| A_68_P20457526 | chr1:95700053-95700097                            | NM_025454:-467     | Ing5       | DIVERGENT_PROMOTER     | 1.754                                                        | 3.519                          | 1095.13            | 3853.92            | 6.171                          | 890.34             | 5494.47            |
| A_68_P20556967 | chr1:121317480-121317524                          | NM_008381:1323     | Inhbb      | INSIDE                 | 2.337                                                        | 6.799                          | 1585.18            | 10777.19           | 15.888                         | 1233.25            | 19593.83           |
| A_68_P20556970 | chr1:121318089-121318133                          | NM_008381:715      | Inhbb      | INSIDE                 | 2.159                                                        | 5.335                          | 1743.08            | 9299.56            | 11.520                         | 1390.23            | 16015.89           |
| A_68_P20556969 | chr1:121317983-121318027                          | NM_008381:821      | Inhbb      | INSIDE                 | 1.738                                                        | 5.199                          | 2087.36            | 10852.02           | 9.033                          | 1599.33            | 14447.15           |
| A_68_P21569910 | chr2:119303067-119303111                          | NM_026574:277      | Ino80      | INSIDE                 | 2.468                                                        | 6.138                          | 4882.70            | 29972.16           | 15.151                         | 3573.68            | 54146.25           |
| A_68_P21078500 | chr2:26264786-26264830                            | NM_033134:-100     | Inpp5e     | PROMOTER               | 1.525                                                        | 2.628                          | 4230.13            | 11117.76           | 4.007                          | 3630.11            | 14546.65           |
| A_68_P21078497 | chr2:26264502-26264546                            | NM_033134:184      | Inpp5e     | INSIDE                 | 1.757                                                        | 1.686                          | 929.83             | 1567.59            | 2.963                          | 841.93             | 2494.54            |
| A_68_P28452657 | chr12:56700590-56700634                           | NM_020287:709      | Insm2      | INSIDE                 | 1.655                                                        | 9.081                          | 1368.34            | 12425.99           | 15.026                         | 1009.74            | 15172.08           |
| A_68_P22310075 | chr3:87600813-87600858                            | NM_011832:-37      | Insr       | DIVERGENT_PROMOTER     | 2.490                                                        | 5.861                          | 4961.28            | 29078.26           | 14.593                         | 3144.29            | 45884.25           |
| A_68_P26812405 | chr9:107905152-107905196                          | NM_013785:196      | Ip6k1      | INSIDE                 | 1.529                                                        | 3.185                          | 897.89             | 2859.76            | 4.869                          | 759.91             | 3700.20            |
| A_68_P25460625 | chr7:125999193-125999237                          | NM_001081446:-74   | Iqck       | DIVERGENT_PROMOTER     | 1.614                                                        | 2.484                          | 2719.29            | 6755.40            | 4.010                          | 2190.94            | 8785.77            |
| A_68_P25268780 | chr7:87947830-87947874                            | NM_016721:365      | Iqgap1     | INSIDE                 | 1.551                                                        | 1.594                          | 2098.11            | 3343.77            | 2.473                          | 1544.84            | 3819.74            |
| A_68_P29243355 | chr13:96661950-96661994                           | NM_027711:-95      | Iqgap2     | PROMOTER               | 1.865                                                        | 7.954                          | 4160.49            | 33091.43           | 14.837                         | 3280.77            | 48675.82           |
| A_68_P24804564 | chr6:121423714-121423758                          | NM_001033354:-40   | Iqsec3     | PROMOTER               | 1.997                                                        | 3.206                          | 1771.26            | 5679.11            | 6.403                          | 1380.83            | 8841.48            |

| ProbeName      | Target position of probe on CpG island microarray | TargetID           | GeneSymbol | CpG island Description | Ratio of relative methylation (TiO <sub>2</sub> -NP/Vehicle) | Sham group                     |                    |                    | TiO <sub>2</sub> -H group      |                    |                    |
|----------------|---------------------------------------------------|--------------------|------------|------------------------|--------------------------------------------------------------|--------------------------------|--------------------|--------------------|--------------------------------|--------------------|--------------------|
|                |                                                   |                    |            |                        |                                                              | Relative methylation (Cy5/Cy3) | Cy3 signal (Input) | Cy5 signal (MeDIP) | Relative methylation (Cy5/Cy3) | Cy3 signal (Input) | Cy5 signal (MeDIP) |
| A_68_P24804128 | chr6:121362766-121362810                          | NM_001033354:60908 | Iqsec3     | INSIDE                 | 1.579                                                        | 3.200                          | 3220.17            | 10305.15           | 5.052                          | 2257.41            | 11404.89           |
| A_68_P30452934 | chr15:94374073-94374117                           | NM_029926:4        | Irak4      | INSIDE                 | 1.548                                                        | 2.034                          | 1421.64            | 2891.15            | 3.149                          | 1041.72            | 3279.94            |
| A_68_P25837693 | chr8:47826718-47826762                            | NM_008391:1642     | Irf2       | INSIDE                 | 1.521                                                        | 3.072                          | 367.43             | 1128.61            | 4.671                          | 336.01             | 1569.53            |
| A_68_P26258433 | chr8:129118351-129118402                          | NM_001164598:-1040 | Irf2bp2    | PROMOTER               | 1.843                                                        | 3.789                          | 2286.39            | 8663.45            | 6.982                          | 1790.20            | 12499.77           |
| A_68_P26258415 | chr8:129116306-129116350                          | NM_001164598:1008  | Irf2bp2    | INSIDE                 | 1.689                                                        | 2.066                          | 5891.25            | 12169.15           | 3.488                          | 4892.94            | 17068.30           |
| A_68_P24327113 | chr6:29477125-29477169                            | NM_012057:414      | Irf5       | INSIDE                 | 2.180                                                        | 6.727                          | 2168.97            | 14589.91           | 14.666                         | 1359.43            | 19936.89           |
| A_68_P25005398 | chr7:25318769-25318814                            | NM_153134:3125     | Irgq       | INSIDE                 | 1.923                                                        | 3.356                          | 458.84             | 1539.90            | 6.454                          | 324.51             | 2094.37            |
| A_68_P25005401 | chr7:25319057-25319101                            | NM_153134:3412     | Irgq       | INSIDE                 | 1.845                                                        | 7.348                          | 962.25             | 7071.03            | 13.556                         | 824.30             | 11174.33           |
| A_68_P20391720 | chr1:82288083-82288127                            | NM_010570:-90      | Irs1       | PROMOTER               | 1.740                                                        | 6.741                          | 738.79             | 4980.22            | 11.731                         | 618.89             | 7260.25            |
| A_68_P20391718 | chr1:82287606-82287650                            | NM_010570:386      | Irs1       | INSIDE                 | 1.668                                                        | 4.812                          | 2917.59            | 14038.80           | 8.028                          | 2754.29            | 22111.30           |
| A_68_P25652449 | chr8:11008424-11008468                            | NM_001081212:-16   | Irs2       | PROMOTER               | 1.665                                                        | 3.958                          | 982.97             | 3891.03            | 6.591                          | 988.57             | 6515.77            |
| A_68_P29134822 | chr13:72768633-72768679                           | NM_010574:2231     | Irx2       | INSIDE                 | 1.901                                                        | 2.271                          | 4470.84            | 10154.53           | 4.319                          | 3365.33            | 14533.82           |
| A_68_P26065137 | chr8:94881817-94881861                            | NM_018826:144      | Irx5       | INSIDE                 | 1.701                                                        | 3.067                          | 1410.84            | 4326.52            | 5.216                          | 1114.31            | 5812.43            |
| A_68_P21680284 | chr2:139503094-139503138                          | NM_001126490:-797  | Ism1       | PROMOTER               | 1.576                                                        | 2.196                          | 1282.18            | 2816.30            | 3.462                          | 995.39             | 3446.44            |
| A_68_P24618420 | chr6:87788600-87788644                            | NM_133934:131      | Isy1       | INSIDE                 | 1.579                                                        | 2.686                          | 1150.74            | 3090.41            | 4.240                          | 1002.82            | 4252.19            |
| A_68_P25952867 | chr8:73118782-73118826                            | NM_023627:425      | Isyna1     | INSIDE                 | 1.733                                                        | 1.577                          | 1487.43            | 2345.26            | 2.732                          | 1207.58            | 3299.13            |
| A_68_P21367543 | chr2:79095483-79095527                            | NM_010576:-78      | Itga4      | PROMOTER               | 1.777                                                        | 3.658                          | 2017.49            | 7379.30            | 6.500                          | 1621.43            | 10538.48           |
| A_68_P26867372 | chr9:118515925-118515969                          | NM_133721:120      | Itga9      | INSIDE                 | 1.711                                                        | 3.220                          | 367.80             | 1184.40            | 5.510                          | 296.16             | 1631.77            |
| A_68_P26270749 | chr8:131209761-131209805                          | NM_010578:229      | Itgb1      | INSIDE                 | 1.757                                                        | 2.130                          | 3422.29            | 7289.03            | 3.743                          | 2642.46            | 9891.32            |
| A_68_P28693227 | chr12:103943323-103943367                         | NM_172584:-265     | Itpk1      | PROMOTER               | 1.728                                                        | 5.248                          | 811.62             | 4259.30            | 9.070                          | 709.53             | 6435.19            |
| A_68_P21571253 | chr2:119569096-119569140                          | NM_146125:1046     | Itpka      | INSIDE                 | 2.303                                                        | 3.874                          | 2504.23            | 9700.66            | 8.922                          | 1955.76            | 17450.11           |
| A_68_P25016218 | chr7:28013554-28013598                            | NM_181593:40       | Itpkc      | INSIDE                 | 2.074                                                        | 7.976                          | 939.09             | 7490.48            | 16.541                         | 687.48             | 11371.60           |
| A_68_P25958256 | chr8:74203690-74203734                            | NM_001190830:3431  | Jak3       | INSIDE                 | 1.983                                                        | 3.564                          | 823.69             | 2935.98            | 7.070                          | 656.49             | 4641.15            |
| A_68_P25574929 | chr7:146132486-146132530                          | NM_028708:76       | Jakmip3    | INSIDE                 | 4.012                                                        | 0.451                          | 881.02             | 397.57             | 1.810                          | 713.30             | 1291.35            |
| A_68_P30925479 | chr16:84774664-84774708                           | NM_023844:319      | Jam2       | INSIDE                 | 1.508                                                        | 3.443                          | 838.56             | 2887.49            | 5.193                          | 795.58             | 4131.20            |
| A_68_P28997682 | chr13:44829049-44829093                           | NM_001205043:2431  | Jarid2     | INSIDE                 | 2.312                                                        | 8.821                          | 15712.06           | 138592.40          | 20.390                         | 9201.23            | 187610.30          |
| A_68_P28997663 | chr13:44826717-44826761                           | NM_001205043:99    | Jarid2     | INSIDE                 | 2.028                                                        | 5.777                          | 5348.99            | 30900.59           | 11.717                         | 3961.04            | 46412.44           |
| A_68_P28997657 | chr13:44826068-44826112                           | NM_001205044:-52   | Jarid2     | PROMOTER               | 1.540                                                        | 2.474                          | 2897.66            | 7168.55            | 3.810                          | 2247.25            | 8561.24            |
| A_68_P28605007 | chr12:86940319-86940363                           | NM_030887:-25      | Jdp2       | PROMOTER               | 2.462                                                        | 7.922                          | 7190.55            | 56964.74           | 19.503                         | 5194.50            | 101306.80          |
| A_68_P24381989 | chr6:39155596-39155640                            | NM_001033430:1154  | Jhdm1d     | INSIDE                 | 2.359                                                        | 5.189                          | 5116.70            | 26550.66           | 12.238                         | 3987.22            | 48797.57           |
| A_68_P24382000 | chr6:39157044-39157088                            | NM_001033430:-294  | Jhdm1d     | PROMOTER               | 1.774                                                        | 8.461                          | 8493.65            | 71863.49           | 15.006                         | 8119.38            | 121837.70          |
| A_68_P28530101 | chr12:73186989-73187033                           | NM_001205067:185   | Jkamp      | INSIDE                 | 2.316                                                        | 6.814                          | 2167.14            | 14767.70           | 15.779                         | 1323.51            | 20883.40           |
| A_68_P30367903 | chr15:79518094-79518138                           | NM_028792:186      | Josd1      | INSIDE                 | 1.887                                                        | 3.055                          | 1146.51            | 3502.77            | 5.766                          | 919.95             | 5304.26            |
| A_68_P26228655 | chr8:124277307-124277351                          | NM_020605:22870    | Jph3       | INSIDE                 | 1.597                                                        | 4.386                          | 798.68             | 3502.79            | 7.004                          | 595.82             | 4173.10            |
| A_68_P29616407 | chr14:55733626-55733670                           | NM_177049:2124     | Jph4       | INSIDE                 | 1.505                                                        | 3.567                          | 6810.59            | 24294.32           | 5.368                          | 4485.51            | 24077.71           |
| A_68_P25953471 | chr8:73223632-73223676                            | NM_010592:2017     | Jund       | INSIDE                 | 1.654                                                        | 4.674                          | 1216.41            | 5685.67            | 7.731                          | 1052.44            | 8136.16            |
| A_68_P28067852 | chr11:100258833-100258877                         | NM_010593:250      | Jup        | INSIDE                 | 2.193                                                        | 5.577                          | 3327.06            | 18556.04           | 12.233                         | 2328.22            | 28480.36           |
| A_68_P26348962 | chr9:21602957-21603001                            | NM_145611:12       | Kank2      | INSIDE                 | 1.893                                                        | 2.623                          | 1978.53            | 5190.52            | 4.966                          | 1544.30            | 7669.06            |
| A_68_P31150606 | chr17:33954625-33954670                           | NM_030697:7180     | Kank3      | INSIDE                 | 1.539                                                        | 2.105                          | 592.68             | 1247.40            | 3.239                          | 549.54             | 1780.05            |
| A_68_P26920438 | chr10:7445673-7445717                             | NM_011835:-103     | Katna1     | PROMOTER               | 1.654                                                        | 1.716                          | 3575.01            | 6133.04            | 2.837                          | 2711.27            | 7691.58            |
| A_68_P25678282 | chr8:15027507-15027551                            | NM_029116:16504    | Kbtbd11    | INSIDE                 | 1.651                                                        | 3.122                          | 764.09             | 2385.72            | 5.154                          | 619.63             | 3193.55            |
| A_68_P26587421 | chr9:65238821-65238865                            | NM_028974:617      | Kbtbd13    | INSIDE                 | 1.543                                                        | 3.366                          | 640.77             | 2157.15            | 5.196                          | 558.74             | 2903.16            |
| A_68_P24476912 | chr6:56747694-56747738                            | NM_145958:91       | Kbtbd2     | INSIDE                 | 1.572                                                        | 1.972                          | 1031.50            | 2033.69            | 3.100                          | 895.96             | 2777.48            |
| A_68_P26885522 | chr9:121686826-121686870                          | NM_028202:124      | Kbtbd5     | INSIDE                 | 1.570                                                        | 2.948                          | 478.89             | 1411.61            | 4.628                          | 485.79             | 2248.74            |
| A_68_P22404196 | chr3:106904415-106904459                          | NM_008417:-48      | Kena2      | PROMOTER               | 1.568                                                        | 2.767                          | 2265.93            | 6269.43            | 4.338                          | 1842.84            | 7994.73            |
| A_68_P25092923 | chr7:52662436-52662480                            | NM_010596:1129     | Kena7      | INSIDE                 | 1.630                                                        | 5.866                          | 1061.24            | 6225.62            | 9.563                          | 899.09             | 8597.98            |
| A_68_P21834182 | chr2:167015184-167015228                          | NM_008420:-907     | Kcnb1      | PROMOTER               | 1.693                                                        | 5.632                          | 3446.00            | 19408.40           | 9.534                          | 2638.55            | 25156.65           |

| ProbeName      | Target position of probe on CpG island microarray | TargetID           | GeneSymbol | CpG island Description | Ratio of relative methylation (TiO <sub>2</sub> -NP/Vehicle) | Sham group                     |                    |                    | TiO <sub>2</sub> -H group      |                    |                    |
|----------------|---------------------------------------------------|--------------------|------------|------------------------|--------------------------------------------------------------|--------------------------------|--------------------|--------------------|--------------------------------|--------------------|--------------------|
|                |                                                   |                    |            |                        |                                                              | Relative methylation (Cy5/Cy3) | Cy3 signal (Input) | Cy5 signal (MeDIP) | Relative methylation (Cy5/Cy3) | Cy3 signal (Input) | Cy5 signal (MeDIP) |
| A_68_P25099054 | chr7:53683157-53683201                            | NM_001112739:31312 | Kcnc1      | INSIDE                 | 1.626                                                        | 7.224                          | 2254.21            | 16284.40           | 11.748                         | 1472.00            | 17293.73           |
| A_68_P25098823 | chr7:53653169-53653213                            | NM_001112739:1324  | Kcnc1      | INSIDE                 | 2.122                                                        | 1.801                          | 902.15             | 1624.83            | 3.822                          | 1053.18            | 4025.32            |
| A_68_P25088286 | chr7:51846961-51847005                            | NM_008422:727      | Kcnc3      | INSIDE                 | 1.974                                                        | 6.215                          | 2829.89            | 17588.75           | 12.271                         | 2291.82            | 28124.06           |
| A_68_P25088285 | chr7:51846895-51846939                            | NM_008422:661      | Kcnc3      | INSIDE                 | 1.855                                                        | 1.592                          | 1174.97            | 1870.06            | 2.953                          | 960.40             | 2835.96            |
| A_68_P22397067 | chr3:105255865-105255909                          | NM_019931:-5847    | Kend3      | PROMOTER               | 1.519                                                        | 2.065                          | 1408.52            | 2909.25            | 3.138                          | 1170.27            | 3672.79            |
| A_68_P20942041 | chr1:194014550-194014594                          | NM_001038607:-181  | Kenh1      | PROMOTER               | 1.857                                                        | 6.657                          | 1568.79            | 10443.24           | 12.363                         | 1127.88            | 13944.47           |
| A_68_P30478814 | chr15:99054189-99054233                           | NM_010601:-1196    | Kenh3      | PROMOTER               | 1.794                                                        | 4.971                          | 3105.74            | 15437.94           | 8.916                          | 2434.66            | 21707.96           |
| A_68_P30478815 | chr15:99054306-99054350                           | NM_010601:-1078    | Kenh3      | PROMOTER               | 1.529                                                        | 2.143                          | 1207.57            | 2587.92            | 3.278                          | 1052.83            | 3450.90            |
| A_68_P28069996 | chr11:100621272-100621316                         | NM_001081194:-202  | Kenh4      | PROMOTER               | 2.374                                                        | 4.449                          | 752.81             | 3349.60            | 10.562                         | 555.22             | 5864.15            |
| A_68_P28099140 | chr11:105881863-105881907                         | NM_001037712:12368 | Kenh6      | INSIDE                 | 1.967                                                        | 7.729                          | 2711.08            | 20953.02           | 15.199                         | 1794.72            | 27278.05           |
| A_68_P27697249 | chr11:33743483-33743527                           | NM_001190885:81    | Kenip1     | INSIDE                 | 1.699                                                        | 5.080                          | 5765.99            | 29288.62           | 8.631                          | 4620.64            | 39880.89           |
| A_68_P32140683 | chr19:45890581-45890625                           | NM_030716:-309     | Kenip2     | PROMOTER               | 1.823                                                        | 1.932                          | 2746.60            | 5307.61            | 3.524                          | 2147.02            | 7565.05            |
| A_68_P21613749 | chr2:127308338-127308382                          | NM_001111331:-125  | Kenip3     | PROMOTER               | 1.984                                                        | 9.371                          | 1665.44            | 15607.18           | 18.594                         | 1049.56            | 19515.72           |
| A_68_P25096865 | chr7:53356200-53356244                            | NM_001204411:-88   | Kenj11     | PROMOTER               | 1.710                                                        | 7.334                          | 10124.04           | 74246.41           | 12.539                         | 6198.09            | 77718.21           |
| A_68_P25095297 | chr7:53075356-53075400                            | NM_145963:4739     | Kenj14     | INSIDE                 | 1.746                                                        | 3.039                          | 3221.66            | 9789.23            | 5.306                          | 2632.50            | 13967.01           |
| A_68_P30984747 | chr16:95219135-95219179                           | NM_001025584:147   | Kenj6      | INSIDE                 | 1.505                                                        | 6.088                          | 1997.49            | 12160.32           | 9.160                          | 1688.40            | 15466.36           |
| A_68_P28670941 | chr12:99812671-99812719                           | NM_029911:3456     | Kenk10     | INSIDE                 | 1.621                                                        | 2.562                          | 1091.94            | 2797.22            | 4.153                          | 868.16             | 3605.85            |
| A_68_P31425152 | chr17:88197017-88197061                           | NM_199251:296      | Kenk12     | INSIDE                 | 1.678                                                        | 3.655                          | 1476.38            | 5396.14            | 6.132                          | 1317.96            | 8082.18            |
| A_68_P21814796 | chr2:163684382-163684426                          | NM_001030292:4919  | Kenk15     | INSIDE                 | 1.766                                                        | 2.761                          | 1864.02            | 5147.25            | 4.876                          | 1411.23            | 6881.10            |
| A_68_P23573590 | chr5:30925082-30925126                            | NM_010608:34562    | Kenk3      | INSIDE                 | 1.920                                                        | 5.787                          | 2350.06            | 13599.97           | 11.110                         | 1736.33            | 19291.40           |
| A_68_P23573354 | chr5:30890939-30890983                            | NM_010608:418      | Kenk3      | INSIDE                 | 1.531                                                        | 6.699                          | 1037.65            | 6951.16            | 10.254                         | 713.64             | 7317.35            |
| A_68_P29445598 | chr14:21001028-21001072                           | NM_021542:-46      | Kenk5      | PROMOTER               | 1.833                                                        | 3.715                          | 4890.28            | 18167.01           | 6.809                          | 3684.25            | 25086.54           |
| A_68_P29469015 | chr14:24824174-24824218                           | NM_010610:-769     | Kenma1     | PROMOTER               | 1.772                                                        | 3.849                          | 993.01             | 3822.26            | 6.822                          | 802.86             | 5476.86            |
| A_68_P27475787 | chr10:115911149-115911205                         | NM_021452:-597     | Kenmb4     | PROMOTER               | 1.589                                                        | 2.152                          | 256.78             | 552.55             | 3.418                          | 188.17             | 643.27             |
| A_68_P25954496 | chr8:73376577-73376621                            | NM_032397:4309     | Kenm1      | INSIDE                 | 1.808                                                        | 5.381                          | 1881.59            | 10125.04           | 9.727                          | 1305.40            | 12698.01           |
| A_68_P25954584 | chr8:73389578-73389623                            | NM_032397:-8693    | Kenm1      | PROMOTER               | 1.748                                                        | 1.511                          | 1699.52            | 2567.57            | 2.641                          | 1171.95            | 3095.36            |
| A_68_P31672402 | chr18:45719605-45719649                           | NM_080465:-181     | Kenm2      | PROMOTER               | 1.606                                                        | 3.625                          | 3770.40            | 13666.74           | 5.820                          | 3126.64            | 18196.65           |
| A_68_P25598742 | chr7:150293216-150293260                          | NM_008434:80       | Kenq1      | INSIDE                 | 1.883                                                        | 8.553                          | 779.08             | 6663.79            | 16.107                         | 603.76             | 9724.83            |
| A_68_P23253010 | chr4:120419437-120419481                          | NM_001081142:323   | Kenq4      | INSIDE                 | 1.728                                                        | 2.460                          | 1299.17            | 3195.38            | 4.251                          | 1082.81            | 4602.51            |
| A_68_P30130469 | chr15:34767206-34767250                           | NM_181317:93       | Kens2      | INSIDE                 | 1.619                                                        | 2.579                          | 2835.18            | 7311.52            | 4.174                          | 2259.12            | 9429.48            |
| A_68_P28236792 | chr12:11157416-11157460                           | NM_173417:-259     | Kens3      | PROMOTER               | 1.798                                                        | 12.300                         | 3004.88            | 36959.76           | 22.110                         | 2237.03            | 49461.30           |
| A_68_P30183902 | chr15:44945966-44946010                           | NM_026200:492      | Kenv1      | INSIDE                 | 1.925                                                        | 7.547                          | 2060.05            | 15548.16           | 14.527                         | 1203.61            | 17485.23           |
| A_68_P31515584 | chr18:15221979-15222023                           | NM_001142731:91    | Ketd1      | INSIDE                 | 1.716                                                        | 3.299                          | 1144.74            | 3776.04            | 5.660                          | 975.32             | 5519.95            |
| A_68_P29863087 | chr14:103381523-103381567                         | NM_177715:310      | Ketd12     | INSIDE                 | 1.784                                                        | 8.827                          | 2400.30            | 21187.50           | 15.751                         | 1800.82            | 28365.41           |
| A_68_P25503044 | chr7:134072503-134072547                          | NM_172747:132      | Ketd13     | INSIDE                 | 1.566                                                        | 5.367                          | 1536.35            | 8245.63            | 8.404                          | 1331.12            | 11186.38           |
| A_68_P23777458 | chr5:69732840-69732884                            | NM_175519:86       | Ketd8      | INSIDE                 | 2.354                                                        | 17.034                         | 6463.80            | 110101.70          | 40.098                         | 4087.66            | 163905.10          |
| A_68_P23334806 | chr4:136158309-136158353                          | NM_133872:308      | Kdm1a      | INSIDE                 | 2.080                                                        | 7.767                          | 4209.78            | 32698.79           | 16.158                         | 3270.28            | 52841.38           |
| A_68_P31922938 | chr19:4397627-4397671                             | NM_001001984:-571  | Kdm2a      | PROMOTER               | 2.175                                                        | 3.087                          | 1795.80            | 5543.40            | 6.715                          | 1491.27            | 10014.01           |
| A_68_P31922932 | chr19:4396607-4396651                             | NM_001001984:449   | Kdm2a      | INSIDE                 | 1.592                                                        | 2.723                          | 3295.26            | 8971.97            | 4.335                          | 2770.30            | 12010.53           |
| A_68_P24052813 | chr5:123350619-123350663                          | NM_013910:-281     | Kdm2b      | PROMOTER               | 1.917                                                        | 2.640                          | 545.58             | 1440.33            | 5.060                          | 392.77             | 1987.24            |
| A_68_P24052812 | chr5:123350466-123350510                          | NM_013910:-129     | Kdm2b      | PROMOTER               | 1.667                                                        | 3.445                          | 921.33             | 3173.67            | 5.744                          | 809.91             | 4651.76            |
| A_68_P20634033 | chr1:136457792-136457836                          | NM_152895:1060     | Kdm5b      | INSIDE                 | 1.678                                                        | 3.188                          | 3541.18            | 11290.03           | 5.350                          | 2979.49            | 15940.59           |
| A_68_P32281785 | chrX:17740258-17740302                            | NM_009483:488      | Kdm6a      | INSIDE                 | 2.036                                                        | 2.133                          | 1484.78            | 3166.69            | 4.342                          | 891.83             | 3872.13            |
| A_68_P32281782 | chrX:17739949-17739993                            | NM_009483:178      | Kdm6a      | INSIDE                 | 1.915                                                        | 1.913                          | 2267.29            | 4337.15            | 3.663                          | 1308.27            | 4792.41            |
| A_68_P23812530 | chr5:76374553-76374597                            | NM_010612:-121     | Kdr        | PROMOTER               | 1.735                                                        | 4.224                          | 6303.13            | 26622.36           | 7.328                          | 4621.05            | 33863.12           |
| A_68_P26346115 | chr9:21043701-21043745                            | NM_001110305:54    | Keap1      | INSIDE                 | 1.815                                                        | 1.799                          | 2047.85            | 3683.26            | 3.264                          | 1688.13            | 5510.34            |
| A_68_P31259695 | chr17:57170806-57170850                           | NM_010613:102      | Khsrp      | INSIDE                 | 1.597                                                        | 4.699                          | 2028.91            | 9532.99            | 7.505                          | 1900.29            | 14262.48           |

| ProbeName      | Target position of probe on CpG island microarray | TargetID           | GeneSymbol | CpG island Description | Ratio of relative methylation (TiO <sub>2</sub> -NP/Vehicle) | Sham group                     |                    |                    | TiO <sub>2</sub> -H group      |                    |                    |
|----------------|---------------------------------------------------|--------------------|------------|------------------------|--------------------------------------------------------------|--------------------------------|--------------------|--------------------|--------------------------------|--------------------|--------------------|
|                |                                                   |                    |            |                        |                                                              | Relative methylation (Cy5/Cy3) | Cy3 signal (Input) | Cy5 signal (MeDIP) | Relative methylation (Cy5/Cy3) | Cy3 signal (Input) | Cy5 signal (MeDIP) |
| A_68_P31259625 | chr17:57161925-57161969                           | NM_010613:8984     | Khsrp      | INSIDE                 | 1.510                                                        | 2.764                          | 4307.69            | 11905.11           | 4.173                          | 3401.95            | 14196.21           |
| A_68_P20646088 | chr1:138363089-138363133                          | NM_001081258:-1424 | Kifl4      | PROMOTER               | 1.504                                                        | 5.511                          | 2003.58            | 11041.10           | 8.290                          | 1645.78            | 13643.44           |
| A_68_P20453282 | chr1:94998673-94998717                            | NM_001110315:-252  | Kifl1a     | PROMOTER               | 1.678                                                        | 2.859                          | 3722.33            | 10641.12           | 4.798                          | 2631.13            | 12622.95           |
| A_68_P23399812 | chr4:148681667-148681711                          | NM_207682:119      | Kifl1b     | INSIDE                 | 1.830                                                        | 4.570                          | 1413.26            | 6458.18            | 8.364                          | 1189.26            | 9946.59            |
| A_68_P23399809 | chr4:148681348-148681392                          | NM_207682:437      | Kifl1b     | INSIDE                 | 1.716                                                        | 3.683                          | 258.15             | 950.86             | 6.319                          | 229.26             | 1448.71            |
| A_68_P30433473 | chr15:90880476-90880520                           | NM_001109040:-119  | Kif21a     | PROMOTER               | 1.975                                                        | 4.611                          | 5323.48            | 24544.24           | 9.106                          | 4245.04            | 38656.75           |
| A_68_P20644107 | chr1:138036961-138037006                          | NM_001039472:9006  | Kif21b     | INSIDE                 | 2.698                                                        | 10.540                         | 4945.35            | 52121.62           | 28.439                         | 3189.20            | 90698.85           |
| A_68_P20644035 | chr1:138028029-138028073                          | NM_001039472:73    | Kif21b     | INSIDE                 | 1.532                                                        | 1.639                          | 677.67             | 1110.85            | 2.512                          | 547.07             | 1374.03            |
| A_68_P31472616 | chr18:6241499-6241543                             | NM_008448:2        | Kif5b      | INSIDE                 | 2.705                                                        | 13.405                         | 1618.85            | 21700.12           | 36.255                         | 1036.17            | 37566.28           |
| A_68_P31150844 | chr17:34027540-34027584                           | NM_001195298:16    | Kifc1      | INSIDE                 | 1.855                                                        | 2.792                          | 4744.51            | 13244.59           | 5.177                          | 3568.63            | 18475.69           |
| A_68_P30349763 | chr15:76491001-76491045                           | NM_010630:-48      | Kifc2      | DIVERGENT_PROMOTER     | 2.034                                                        | 5.654                          | 3010.19            | 17019.65           | 11.499                         | 2241.26            | 25773.16           |
| A_68_P25031610 | chr7:31242110-31242154                            | NM_172898:402      | Kirrel2    | INSIDE                 | 2.494                                                        | 15.068                         | 2274.51            | 34272.62           | 37.583                         | 1235.22            | 46423.38           |
| A_68_P32383986 | chrX:50097843-50097887                            | NR_003188:-94      | Kis2       | PROMOTER               | 1.618                                                        | 2.686                          | 13355.12           | 35865.81           | 4.346                          | 6244.36            | 27135.25           |
| A_68_P28745894 | chr12:112997376-112997420                         | NM_008450:339      | Klc1       | INSIDE                 | 1.732                                                        | 1.607                          | 6227.53            | 10010.32           | 2.783                          | 4582.88            | 12756.15           |
| A_68_P24993125 | chr7:19989502-19989546                            | NM_146182:-4319    | Klc3       | DIVERGENT_PROMOTER     | 1.870                                                        | 5.073                          | 605.74             | 3072.82            | 9.488                          | 524.06             | 4972.47            |
| A_68_P26022557 | chr8:87427077-87427121                            | NM_010635:1272     | Klfl       | INSIDE                 | 1.684                                                        | 1.831                          | 1470.19            | 2692.40            | 3.084                          | 1256.92            | 3876.80            |
| A_68_P30148784 | chr15:38228806-38228850                           | NM_013692:1634     | Klfl0      | INSIDE                 | 1.590                                                        | 2.565                          | 2289.00            | 5871.06            | 4.079                          | 1935.98            | 7897.38            |
| A_68_P30148791 | chr15:38229661-38229705                           | NM_013692:780      | Klfl0      | INSIDE                 | 1.516                                                        | 5.717                          | 1731.12            | 9896.19            | 8.669                          | 1387.82            | 12030.48           |
| A_68_P28290823 | chr12:25335979-25336023                           | NM_178357:-235     | Klfl1      | PROMOTER               | 2.054                                                        | 4.846                          | 5228.33            | 25336.60           | 9.953                          | 3774.20            | 37564.05           |
| A_68_P25174406 | chr7:71083847-71083891                            | NM_021366:-67      | Klfl3      | PROMOTER               | 2.142                                                        | 5.907                          | 1489.42            | 8798.10            | 12.651                         | 1164.39            | 14731.24           |
| A_68_P25174396 | chr7:71082541-71082585                            | NM_021366:1239     | Klfl3      | INSIDE                 | 1.663                                                        | 5.204                          | 13884.08           | 72255.25           | 8.652                          | 11746.07           | 101631.50          |
| A_68_P24632571 | chr6:90413720-90413764                            | NM_023184:1123     | Klfl5      | INSIDE                 | 1.649                                                        | 4.076                          | 1932.73            | 7877.24            | 6.721                          | 1466.57            | 9856.49            |
| A_68_P22934435 | chr4:55545469-55545513                            | NM_010637:-143     | Klf4       | PROMOTER               | 2.029                                                        | 4.472                          | 1865.43            | 8341.62            | 9.073                          | 1581.81            | 14351.88           |
| A_68_P32016047 | chr19:23210802-23210846                           | NM_010638:-4891    | Klf9       | PROMOTER               | 1.834                                                        | 3.797                          | 3494.13            | 13267.89           | 6.963                          | 2747.09            | 19127.36           |
| A_68_P32016039 | chr19:23209957-23210001                           | NM_010638:-5737    | Klf9       | PROMOTER               | 1.812                                                        | 4.846                          | 4436.94            | 21499.29           | 8.780                          | 3414.58            | 29979.51           |
| A_68_P20620522 | chr1:134195663-134195707                          | NM_144810:482      | Klhdc8a    | INSIDE                 | 1.606                                                        | 3.422                          | 890.52             | 3047.47            | 5.495                          | 786.43             | 4321.27            |
| A_68_P23415959 | chr4:151383528-151383572                          | NM_001033352:551   | Klhl21     | INSIDE                 | 1.506                                                        | 1.829                          | 351.42             | 642.62             | 2.754                          | 315.28             | 868.14             |
| A_68_P30585937 | chr16:20098035-20098079                           | NM_029436:430      | Klhl24     | INSIDE                 | 1.679                                                        | 2.574                          | 1667.15            | 4291.61            | 4.323                          | 1290.36            | 5578.07            |
| A_68_P30585939 | chr16:20098297-20098341                           | NM_029436:692      | Klhl24     | INSIDE                 | 1.659                                                        | 2.204                          | 1057.99            | 2331.82            | 3.656                          | 989.42             | 3617.73            |
| A_68_P25951936 | chr8:72976257-72976301                            | NM_001122830:24564 | Klhl26     | INSIDE                 | 1.688                                                        | 2.504                          | 251.71             | 630.21             | 4.226                          | 258.31             | 1091.58            |
| A_68_P23539922 | chr5:23606508-23606552                            | NM_001161800:123   | Klhl7      | INSIDE                 | 1.516                                                        | 1.684                          | 880.42             | 1482.98            | 2.553                          | 695.55             | 1775.95            |
| A_68_P31428327 | chr17:88929344-88929388                           | NM_028658:-97      | Klraql     | PROMOTER               | 2.326                                                        | 8.666                          | 2680.12            | 23227.16           | 20.154                         | 1767.89            | 35629.85           |
| A_68_P31428328 | chr17:88929429-88929473                           | NM_028658:-13      | Klraql     | PROMOTER               | 2.114                                                        | 6.174                          | 817.38             | 5046.29            | 13.049                         | 621.87             | 8114.53            |
| A_68_P28049252 | chr11:97049849-97049893                           | NM_008379:-664     | Kpnb1      | PROMOTER               | 1.689                                                        | 2.834                          | 861.80             | 2442.52            | 4.787                          | 836.84             | 4005.87            |
| A_68_P24535485 | chr6:71222087-71222131                            | NM_145568:96       | Krec1      | INSIDE                 | 2.134                                                        | 11.063                         | 1731.55            | 19155.50           | 23.604                         | 1167.46            | 27557.14           |
| A_68_P24535484 | chr6:71221790-71221834                            | NM_145568:-200     | Krec1      | DIVERGENT_PROMOTER     | 2.044                                                        | 6.040                          | 3652.61            | 22061.07           | 12.346                         | 2689.46            | 33203.28           |
| A_68_P24535482 | chr6:71221514-71221558                            | NM_145568:-476     | Krec1      | DIVERGENT_PROMOTER     | 1.741                                                        | 4.318                          | 2746.85            | 11859.56           | 7.516                          | 1893.83            | 14233.44           |
| A_68_P24535483 | chr6:71221618-71221662                            | NM_145568:-372     | Krec1      | DIVERGENT_PROMOTER     | 1.546                                                        | 7.603                          | 684.67             | 5205.32            | 11.755                         | 621.59             | 7307.05            |
| A_68_P23447098 | chr5:3803414-3803458                              | NR_033173:256      | Krit1      | INSIDE                 | 1.998                                                        | 5.399                          | 2144.76            | 11579.96           | 10.788                         | 1737.16            | 18740.61           |
| A_68_P30495553 | chr15:101858609-101858653                         | NM_010664:-16      | Krt18      | PROMOTER               | 1.687                                                        | 2.231                          | 1396.41            | 3114.85            | 3.763                          | 1205.16            | 4535.54            |
| A_68_P28066375 | chr11:100006570-100006614                         | NM_008471:641      | Krt19      | INSIDE                 | 1.821                                                        | 2.693                          | 5241.41            | 14114.38           | 4.905                          | 4115.85            | 20188.17           |
| A_68_P23577316 | chr5:31554254-31554298                            | NM_027221:198      | Krteap3    | INSIDE                 | 1.746                                                        | 5.588                          | 2563.92            | 14326.24           | 9.756                          | 2030.20            | 19806.48           |
| A_68_P27019249 | chr10:26095302-26095346                           | NM_172787:-333     | L3mbtl3    | PROMOTER               | 1.683                                                        | 2.585                          | 3469.39            | 8967.44            | 4.350                          | 2605.96            | 11334.74           |
| A_68_P20042287 | chr1:13650338-13650382                            | NM_145381:230      | Lactb2     | INSIDE                 | 1.567                                                        | 5.127                          | 2361.50            | 12108.17           | 8.035                          | 1864.14            | 14978.65           |
| A_68_P21902328 | chr2:179960330-179960374                          | NM_001081171:212   | Lama5      | INSIDE                 | 2.052                                                        | 2.789                          | 706.81             | 1971.49            | 5.724                          | 600.12             | 3434.97            |
| A_68_P20726280 | chr1:155180208-155180252                          | NM_010683:-314     | Lamc1      | PROMOTER               | 1.819                                                        | 7.614                          | 27733.70           | 211155.70          | 13.851                         | 15482.40           | 214448.20          |
| A_68_P32245740 | chrX:8777550-8777594                              | NM_173414:474      | Lanc13     | INSIDE                 | 1.856                                                        | 3.553                          | 2031.89            | 7220.04            | 6.594                          | 1133.27            | 7472.63            |

| ProbeName      | Target position of probe on CpG island microarray | TargetID            | GeneSymbol | CpG island Description | Ratio of relative methylation (TiO <sub>2</sub> -NP/Vehicle) | Sham group                     |                    |                    | TiO <sub>2</sub> -H group      |                    |                    |
|----------------|---------------------------------------------------|---------------------|------------|------------------------|--------------------------------------------------------------|--------------------------------|--------------------|--------------------|--------------------------------|--------------------|--------------------|
|                |                                                   |                     |            |                        |                                                              | Relative methylation (Cy5/Cy3) | Cy3 signal (Input) | Cy5 signal (MeDIP) | Relative methylation (Cy5/Cy3) | Cy3 signal (Input) | Cy5 signal (MeDIP) |
| A_68_P28225274 | chr12:8928368-8928412                             | NM_008640:278       | Laptm4a    | INSIDE                 | 1.621                                                        | 2.539                          | 2628.18            | 6673.66            | 4.117                          | 2032.54            | 8367.79            |
| A_68_P22082256 | chr3:40753573-40753617                            | NM_001040399:-958   | Larp1b     | PROMOTER               | 1.793                                                        | 2.331                          | 22714.34           | 52937.90           | 4.178                          | 16691.41           | 69733.62           |
| A_68_P30483162 | chr15:99803108-99803152                           | NM_001024526:-80    | Larp4      | PROMOTER               | 1.549                                                        | 1.794                          | 1419.86            | 2547.83            | 2.780                          | 1207.46            | 3356.65            |
| A_68_P28052725 | chr11:97660923-97660967                           | NM_010688:-41       | Lasp1      | PROMOTER               | 1.533                                                        | 5.253                          | 3494.89            | 18360.31           | 8.055                          | 2884.12            | 23231.12           |
| A_68_P30482201 | chr15:99602827-99602871                           | NM_028015:98        | Lass5      | INSIDE                 | 1.627                                                        | 3.930                          | 4100.43            | 16113.09           | 6.392                          | 3087.66            | 19737.30           |
| A_68_P29629464 | chr14:58318596-58318640                           | NM_015771:46342     | Lats2      | INSIDE                 | 1.859                                                        | 4.525                          | 1145.35            | 5183.03            | 8.411                          | 850.90             | 7156.64            |
| A_68_P32137222 | chr19:45309238-45309283                           | NM_010691:466       | Lbx1       | INSIDE                 | 1.839                                                        | 4.671                          | 1595.40            | 7451.81            | 8.589                          | 1245.19            | 10695.25           |
| A_68_P23658789 | chr5:46248126-46248170                            | NM_172153:-357      | Lcor1      | PROMOTER               | 1.999                                                        | 2.835                          | 1420.42            | 4026.53            | 5.666                          | 1124.72            | 6372.68            |
| A_68_P29530592 | chr14:35362336-35362380                           | NM_001039074:39435  | Ldb3       | INSIDE                 | 1.756                                                        | 1.541                          | 946.64             | 1459.23            | 2.707                          | 874.65             | 2367.60            |
| A_68_P30395524 | chr15:84388079-84388123                           | NM_177630:153       | Ldoc11     | INSIDE                 | 1.916                                                        | 7.935                          | 2483.85            | 19709.22           | 15.205                         | 2070.29            | 31478.86           |
| A_68_P22530177 | chr3:130815462-130815506                          | NM_010703:2096      | Lef1       | INSIDE                 | 1.782                                                        | 3.664                          | 2595.49            | 9508.91            | 6.530                          | 2057.48            | 13436.06           |
| A_68_P22530159 | chr3:130813231-130813275                          | NM_010703:-136      | Lef1       | PROMOTER               | 1.679                                                        | 2.180                          | 900.09             | 1962.64            | 3.661                          | 805.09             | 2947.17            |
| A_68_P31114987 | chr17:27341486-27341531                           | NM_146075:-125      | Lemd2      | PROMOTER               | 1.662                                                        | 1.858                          | 956.19             | 1776.83            | 3.088                          | 785.44             | 2425.69            |
| A_68_P27500779 | chr10:120416497-120416541                         | NM_001081193:-132   | Lemd3      | PROMOTER               | 1.790                                                        | 4.313                          | 931.72             | 4018.41            | 7.721                          | 825.94             | 6376.93            |
| A_68_P27500776 | chr10:120416131-120416176                         | NM_001081193:233    | Lemd3      | INSIDE                 | 1.634                                                        | 2.904                          | 292.41             | 849.04             | 4.744                          | 304.63             | 1445.30            |
| A_68_P24947962 | chr7:4098539-4098584                              | NM_172736:9904      | Leng8      | INSIDE                 | 1.512                                                        | 4.325                          | 1465.62            | 6339.23            | 6.541                          | 1229.91            | 8045.26            |
| A_68_P26644020 | chr9:75289818-75289862                            | NM_001039522:510    | Leo1       | INSIDE                 | 1.524                                                        | 2.105                          | 470.35             | 990.02             | 3.207                          | 362.79             | 1163.57            |
| A_68_P28067972 | chr11:100275705-100275749                         | NM_176830:407       | Leprel4    | INSIDE                 | 1.787                                                        | 4.906                          | 930.00             | 4562.88            | 8.768                          | 870.89             | 7635.61            |
| A_68_P28067969 | chr11:100275377-100275421                         | NM_176830:735       | Leprel4    | INSIDE                 | 1.527                                                        | 2.451                          | 999.41             | 2449.55            | 3.742                          | 782.26             | 2927.01            |
| A_68_P23156220 | chr4:101320226-101320270                          | NM_175036:-139      | Leprot     | PROMOTER               | 1.638                                                        | 1.858                          | 6413.77            | 11913.85           | 3.042                          | 4740.97            | 14421.47           |
| A_68_P23591177 | chr5:34124884-34124928                            | NM_019694:447       | Letm1      | INSIDE                 | 1.696                                                        | 3.111                          | 1436.53            | 4468.72            | 5.276                          | 1267.90            | 6689.45            |
| A_68_P25727982 | chr8:26707741-26707785                            | NM_173012:197       | Letm2      | INSIDE                 | 1.597                                                        | 5.315                          | 1145.84            | 6090.24            | 8.487                          | 988.09             | 8386.39            |
| A_68_P30485948 | chr15:100299486-100299530                         | NM_134093:44        | Letmd1     | INSIDE                 | 1.660                                                        | 2.013                          | 1842.43            | 3709.41            | 3.343                          | 1379.91            | 4612.61            |
| A_68_P24142218 | chr5:141083418-141083462                          | NM_008494:146       | Lfn3       | INSIDE                 | 1.738                                                        | 3.087                          | 2249.66            | 6945.00            | 5.366                          | 1855.84            | 9959.10            |
| A_68_P23695553 | chr5:52957300-52957344                            | NM_144945:197       | Lgi2       | INSIDE                 | 2.033                                                        | 6.026                          | 7794.77            | 46973.65           | 12.249                         | 6150.40            | 75336.94           |
| A_68_P20636645 | chr1:136884255-136884299                          | NM_001033409:117577 | Lgr6       | INSIDE                 | 1.892                                                        | 14.177                         | 2442.11            | 34620.74           | 26.820                         | 1778.74            | 47705.97           |
| A_68_P27977954 | chr11:84333936-84333980                           | NM_008498:5078      | Lhx1       | INSIDE                 | 1.514                                                        | 2.640                          | 571.16             | 1507.89            | 3.996                          | 476.27             | 1903.32            |
| A_68_P24038707 | chr5:120886274-120886318                          | NM_008499:4402      | Lhx5       | INSIDE                 | 1.534                                                        | 5.622                          | 734.69             | 4130.74            | 8.623                          | 673.95             | 5811.19            |
| A_68_P21137838 | chr2:35960787-35960831                            | NM_001083126:-1228  | Lhx6       | PROMOTER               | 1.608                                                        | 3.570                          | 1602.64            | 5721.08            | 5.740                          | 1283.41            | 7366.49            |
| A_68_P22661977 | chr3:153991290-153991334                          | NM_010713:2212      | Lhx8       | INSIDE                 | 1.552                                                        | 2.620                          | 2433.89            | 6377.55            | 4.067                          | 2210.04            | 8988.50            |
| A_68_P29992340 | chr15:7079603-7079647                             | NM_001113386:53     | Lifr       | INSIDE                 | 1.545                                                        | 2.541                          | 797.88             | 2027.27            | 3.925                          | 630.42             | 2474.26            |
| A_68_P25645821 | chr8:9976314-9976358                              | NM_176953:-13       | Lig4       | DIVERGENT_PROMOTER     | 2.332                                                        | 7.229                          | 11513.48           | 83233.88           | 16.857                         | 7753.00            | 130696.00          |
| A_68_P30482738 | chr15:99705731-99705775                           | NM_001113545:135    | Lima1      | INSIDE                 | 1.734                                                        | 5.138                          | 2702.22            | 13884.57           | 8.908                          | 2227.72            | 19845.29           |
| A_68_P23763603 | chr5:67136839-67136883                            | NM_001001980:-218   | Limch1     | PROMOTER               | 1.888                                                        | 5.879                          | 1443.65            | 8487.48            | 11.099                         | 1197.28            | 13288.10           |
| A_68_P24112800 | chr5:135164852-135164896                          | NM_010717:-414      | Limk1      | PROMOTER               | 1.847                                                        | 3.153                          | 1731.17            | 5458.42            | 5.825                          | 1224.90            | 7134.82            |
| A_68_P27551860 | chr11:3309041-3309085                             | NM_010718:176       | Limk2      | INSIDE                 | 1.538                                                        | 3.518                          | 1658.89            | 5835.56            | 5.410                          | 1398.92            | 7568.53            |
| A_68_P27163123 | chr10:57786395-57786439                           | NM_026148:203       | Lims1      | INSIDE                 | 1.816                                                        | 4.775                          | 3182.08            | 15193.93           | 8.672                          | 2345.80            | 20343.02           |
| A_68_P23929939 | chr5:100929613-100929657                          | NM_001115010:-2042  | Lin54      | PROMOTER               | 1.720                                                        | 3.153                          | 2338.54            | 7372.86            | 5.423                          | 1885.87            | 10226.99           |
| A_68_P27425024 | chr10:106709059-106709103                         | NM_001033223:194    | Lin7a      | INSIDE                 | 1.571                                                        | 2.971                          | 3596.44            | 10684.37           | 4.666                          | 2802.49            | 13076.50           |
| A_68_P25092719 | chr7:52625927-52625971                            | NM_011698:-14       | Lin7b      | PROMOTER               | 1.519                                                        | 2.163                          | 3110.79            | 6728.46            | 3.285                          | 2368.96            | 7782.17            |
| A_68_P20877047 | chr1:182571834-182571878                          | NM_175186:392       | Lin9       | INSIDE                 | 1.857                                                        | 3.800                          | 539.78             | 2051.03            | 7.055                          | 419.29             | 2957.95            |
| A_68_P26537272 | chr9:56468941-56468985                            | NM_181074:64098     | Lingo1     | INSIDE                 | 1.531                                                        | 4.659                          | 605.59             | 2821.38            | 7.135                          | 486.37             | 3470.21            |
| A_68_P25010202 | chr7:26180987-26181031                            | NM_010719:-2        | Lipe       | PROMOTER               | 1.824                                                        | 3.873                          | 4065.25            | 15743.27           | 7.063                          | 3161.08            | 22325.43           |
| A_68_P25010077 | chr7:26164977-26165021                            | NM_001039507:10127  | Lipe       | INSIDE                 | 1.613                                                        | 3.417                          | 2557.39            | 8738.93            | 5.511                          | 1874.40            | 10329.97           |
| A_68_P31834169 | chr8:75121056-75121100                            | NM_010720:-161      | Lipg       | PROMOTER               | 1.623                                                        | 1.568                          | 2716.88            | 4259.32            | 2.544                          | 2197.72            | 5591.66            |
| A_68_P20148355 | chr1:36502065-36502109                            | NM_001013374:-2     | Lman2l     | PROMOTER               | 1.916                                                        | 2.963                          | 7704.43            | 22829.15           | 5.678                          | 5809.89            | 32991.37           |
| A_68_P20094994 | chr1:24685459-24685503                            | NM_026719:98        | Lmbrd1     | INSIDE                 | 2.688                                                        | 20.375                         | 4317.54            | 87970.49           | 54.775                         | 2990.87            | 163823.90          |

| ProbeName      | Target position of probe on CpG Island microarray | TargetID           | GeneSymbol | CpG island Description | Ratio of relative methylation (TiO <sub>2</sub> -NP/Vehicle) | Sham group                     |                    |                    | TiO <sub>2</sub> -H group      |                    |                    |
|----------------|---------------------------------------------------|--------------------|------------|------------------------|--------------------------------------------------------------|--------------------------------|--------------------|--------------------|--------------------------------|--------------------|--------------------|
|                |                                                   |                    |            |                        |                                                              | Relative methylation (Cy5/Cy3) | Cy3 signal (Input) | Cy5 signal (MeDIP) | Relative methylation (Cy5/Cy3) | Cy3 signal (Input) | Cy5 signal (MeDIP) |
| A_68_P22601420 | chr3:143865390-143865434                          | NM_001161769:-52   | Lmo4       | PROMOTER               | 2.081                                                        | 4.028                          | 7512.89            | 30265.03           | 8.383                          | 5764.40            | 48324.41           |
| A_68_P22601440 | chr3:143867896-143867940                          | NM_001161769:-2558 | Lmo4       | PROMOTER               | 1.514                                                        | 3.237                          | 4765.00            | 15423.48           | 4.901                          | 3566.87            | 17481.44           |
| A_68_P29856568 | chr14:102128930-102128974                         | NM_201529:-192     | Lmo7       | PROMOTER               | 2.621                                                        | 10.226                         | 4507.02            | 46087.56           | 26.806                         | 2966.50            | 79519.01           |
| A_68_P21122760 | chr2:33496334-33496378                            | NM_010725:-325     | Lmx1b      | PROMOTER               | 1.517                                                        | 2.550                          | 1335.58            | 3406.27            | 3.870                          | 1103.55            | 4270.81            |
| A_68_P24171749 | chr5:147887960-147888004                          | NM_080795:166      | Lnx2       | INSIDE                 | 1.826                                                        | 3.175                          | 1701.57            | 5403.14            | 5.797                          | 1544.24            | 8952.35            |
| A_68_P24171753 | chr5:147888406-147888450                          | NM_080795:-280     | Lnx2       | DIVERGENT_PROMOTER     | 1.707                                                        | 3.199                          | 8652.25            | 27677.32           | 5.461                          | 6559.61            | 35820.20           |
| A_68_P24171442 | chr5:147840909-147840953                          | NM_080795:47218    | Lnx2       | INSIDE                 | 1.593                                                        | 2.871                          | 522.01             | 1498.70            | 4.572                          | 468.43             | 2141.74            |
| A_68_P31708189 | chr18:52688590-52688634                           | NM_010728:750      | Lox        | INSIDE                 | 1.545                                                        | 1.456                          | 1093.75            | 1592.08            | 2.249                          | 860.22             | 1934.74            |
| A_68_P26547037 | chr9:58160685-58160729                            | NM_010729:313      | Lox11      | INSIDE                 | 1.624                                                        | 3.568                          | 794.13             | 2833.46            | 5.793                          | 679.29             | 3935.25            |
| A_68_P22951804 | chr4:58566187-58566231                            | NM_172989:-43      | Lpar1      | PROMOTER               | 2.313                                                        | 12.789                         | 2033.78            | 26009.86           | 29.587                         | 1471.32            | 43531.41           |
| A_68_P29140001 | chr13:73605046-73605090                           | NM_145376:238      | Lpcat1     | INSIDE                 | 1.936                                                        | 4.602                          | 5042.49            | 23207.43           | 8.909                          | 3905.21            | 34793.18           |
| A_68_P26068285 | chr8:95379185-95379229                            | NM_173014:-42      | Lpcat2     | PROMOTER               | 1.505                                                        | 6.893                          | 3200.62            | 22061.99           | 10.374                         | 2288.30            | 23738.41           |
| A_68_P23966965 | chr5:107867055-107867099                          | NM_027599:6509     | Lpcat2b    | DOWNSTREAM             | 1.611                                                        | 5.020                          | 584.64             | 2934.97            | 8.088                          | 566.90             | 4585.04            |
| A_68_P20939662 | chr1:193541860-193541904                          | NM_172266:-20      | Lpgat1     | PROMOTER               | 1.640                                                        | 2.460                          | 919.65             | 2262.45            | 4.034                          | 770.36             | 3107.48            |
| A_68_P26016967 | chr8:86424037-86424081                            | NM_181039:62       | Lphn1      | INSIDE                 | 1.601                                                        | 3.211                          | 2264.65            | 7272.80            | 5.141                          | 2047.70            | 10527.10           |
| A_68_P23837522 | chr5:81449591-81449635                            | NM_198702:-1005    | Lphn3      | PROMOTER               | 1.563                                                        | 4.017                          | 1797.47            | 7221.24            | 6.281                          | 1431.07            | 8988.10            |
| A_68_P27996402 | chr11:87630757-87630801                           | NM_080420:8838     | Lpo        | INSIDE                 | 1.874                                                        | 3.124                          | 2302.41            | 7193.28            | 5.856                          | 1764.87            | 10335.15           |
| A_68_P22301528 | chr3:86028273-86028317                            | NM_001077687:-317  | Lrba       | PROMOTER               | 1.785                                                        | 3.658                          | 708.35             | 2591.21            | 6.529                          | 653.27             | 4265.14            |
| A_68_P32730437 | chrX:143988143-143988187                          | NM_001081173:460   | Lrch2      | INSIDE                 | 1.965                                                        | 4.409                          | 9704.97            | 42791.58           | 8.664                          | 6149.70            | 53283.79           |
| A_68_P31220008 | chr17:49071618-49071662                           | NM_027452:-266     | Lrfn2      | PROMOTER               | 2.514                                                        | 5.727                          | 9111.94            | 52180.14           | 14.397                         | 5782.67            | 83254.10           |
| A_68_P25031213 | chr7:31145836-31145880                            | NM_175478:1933     | Lrfn3      | INSIDE                 | 1.660                                                        | 6.991                          | 3361.08            | 23496.42           | 11.602                         | 2447.42            | 28394.03           |
| A_68_P22391858 | chr3:104315425-104315469                          | NM_001025067:333   | Lrig2      | INSIDE                 | 1.760                                                        | 5.016                          | 599.41             | 3006.70            | 8.827                          | 522.51             | 4612.18            |
| A_68_P27537125 | chr10:127058908-127058952                         | NM_008512:-726     | Lrp1       | PROMOTER               | 2.156                                                        | 5.585                          | 2639.93            | 14743.96           | 12.043                         | 1960.62            | 23611.85           |
| A_68_P27537124 | chr10:127058798-127058842                         | NM_008512:-616     | Lrp1       | PROMOTER               | 1.712                                                        | 2.092                          | 4941.30            | 10335.66           | 3.581                          | 4217.40            | 15102.89           |
| A_68_P30156691 | chr15:39775111-39775155                           | NM_172814:171      | Lrp12      | INSIDE                 | 2.102                                                        | 11.020                         | 1141.73            | 12582.07           | 23.167                         | 888.50             | 20584.27           |
| A_68_P31950789 | chr19:10531506-10531550                           | NM_001111140:409   | Lrrc10b    | INSIDE                 | 1.695                                                        | 1.584                          | 591.01             | 936.18             | 2.684                          | 514.45             | 1380.87            |
| A_68_P28886522 | chr13:24373081-24373125                           | NM_026825:-443     | Lrrc16a    | PROMOTER               | 1.515                                                        | 5.019                          | 1735.70            | 8711.35            | 7.604                          | 1462.36            | 11119.99           |
| A_68_P29618044 | chr14:56110165-56110209                           | NM_001024645:257   | Lrrc16b    | INSIDE                 | 1.540                                                        | 2.286                          | 3597.59            | 8222.54            | 3.520                          | 3076.47            | 10829.15           |
| A_68_P27180703 | chr10:60938705-60938749                           | NM_153542:146      | Lrrc20     | INSIDE                 | 1.762                                                        | 16.348                         | 1322.90            | 21626.74           | 28.805                         | 1006.90            | 29004.18           |
| A_68_P24322963 | chr6:28783645-28783689                            | NM_138682:-1919    | Lrrc4      | PROMOTER               | 1.845                                                        | 3.671                          | 1049.16            | 3851.39            | 6.772                          | 1235.47            | 8367.10            |
| A_68_P23955154 | chr5:105844706-105844750                          | NM_001033550:-65   | Lrrc8b     | PROMOTER               | 1.682                                                        | 3.890                          | 293.53             | 1141.87            | 6.542                          | 220.20             | 1440.47            |
| A_68_P21957226 | chr3:14534076-14534120                            | NM_001163579:311   | Lrrcc1     | INSIDE                 | 1.605                                                        | 3.448                          | 2014.65            | 6946.97            | 5.533                          | 1548.92            | 8570.49            |
| A_68_P26827666 | chr9:111020550-111020594                          | NM_001164838:-42   | Lrrfp2     | PROMOTER               | 2.347                                                        | 5.128                          | 3893.76            | 19967.23           | 12.037                         | 2948.94            | 35497.62           |
| A_68_P24792500 | chr6:119280593-119280637                          | NM_001172207:-1392 | Lrtm2      | PROMOTER               | 1.515                                                        | 2.033                          | 2029.62            | 4125.92            | 3.080                          | 1634.56            | 5034.32            |
| A_68_P27765093 | chr11:45758539-45758583                           | NM_028185:-123     | Lsm11      | PROMOTER               | 1.928                                                        | 3.590                          | 3657.32            | 13130.18           | 6.923                          | 2701.76            | 18704.49           |
| A_68_P21900913 | chr2:179759394-179759438                          | NM_177727:-275     | Lsm14b     | PROMOTER               | 1.891                                                        | 4.621                          | 5053.95            | 23356.44           | 8.741                          | 3956.25            | 34580.53           |
| A_68_P21900919 | chr2:179760085-179760129                          | NM_177727:415      | Lsm14b     | INSIDE                 | 1.627                                                        | 4.030                          | 1686.18            | 6795.38            | 6.555                          | 1408.10            | 9230.65            |
| A_68_P27285907 | chr10:80317900-80317944                           | NM_025349:32       | Lsm7       | INSIDE                 | 1.604                                                        | 1.454                          | 1032.35            | 1501.36            | 2.333                          | 818.51             | 1909.53            |
| A_68_P27262526 | chr10:75994451-75994495                           | NM_146006:101      | Lss        | INSIDE                 | 1.886                                                        | 5.474                          | 6782.44            | 37124.20           | 10.325                         | 5005.00            | 51676.57           |
| A_68_P29619799 | chr14:56386649-56386693                           | NM_008519:1872     | Ltb4r1     | INSIDE                 | 1.585                                                        | 6.299                          | 771.24             | 4857.79            | 9.981                          | 638.62             | 6373.79            |
| A_68_P29619756 | chr14:56381232-56381276                           | NM_020490:990      | Ltb4r2     | INSIDE                 | 1.708                                                        | 1.671                          | 743.80             | 1242.88            | 2.855                          | 716.65             | 2045.84            |
| A_68_P28600848 | chr12:86217110-86217154                           | NM_013589:313      | Ltbp2      | INSIDE                 | 1.794                                                        | 1.754                          | 853.83             | 1497.77            | 3.146                          | 705.49             | 2219.75            |
| A_68_P31930681 | chr19:5758063-5758107                             | NM_008520:17181    | Ltbp3      | INSIDE                 | 1.616                                                        | 4.430                          | 806.23             | 3571.76            | 7.160                          | 691.28             | 4949.47            |
| A_68_P25016756 | chr7:28119811-28119855                            | NM_001113549:-1165 | Ltbp4      | PROMOTER               | 2.321                                                        | 7.348                          | 4064.11            | 29862.64           | 17.053                         | 2879.70            | 49106.29           |
| A_68_P23334085 | chr4:136025641-136025685                          | NM_024452:-13      | Luzp1      | PROMOTER               | 1.654                                                        | 5.706                          | 10787.59           | 61551.52           | 9.440                          | 7883.57            | 74420.85           |
| A_68_P21258086 | chr2:60221286-60221330                            | NM_013825:-20      | Ly75       | PROMOTER               | 1.526                                                        | 2.902                          | 3297.93            | 9570.93            | 4.427                          | 2671.37            | 11827.18           |
| A_68_P21204319 | chr2:49643540-49643584                            | NM_027990:357      | Lypd6b     | INSIDE                 | 2.160                                                        | 4.204                          | 1901.65            | 7994.55            | 9.081                          | 1433.64            | 13018.78           |

| ProbeName      | Target position of probe on CpG Island microarray | TargetID           | GeneSymbol | CpG island Description | Ratio of relative methylation (TiO <sub>2</sub> -NP/Vehicle) | Sham group                     |                    |                    | TiO <sub>2</sub> -H group      |                    |                    |
|----------------|---------------------------------------------------|--------------------|------------|------------------------|--------------------------------------------------------------|--------------------------------|--------------------|--------------------|--------------------------------|--------------------|--------------------|
|                |                                                   |                    |            |                        |                                                              | Relative methylation (Cy5/Cy3) | Cy3 signal (Input) | Cy5 signal (MeDIP) | Relative methylation (Cy5/Cy3) | Cy3 signal (Input) | Cy5 signal (MeDIP) |
| A_68_P21204312 | chr2:49642923-49642967                            | NM_027990:-261     | Lypd6b     | PROMOTER               | 1.915                                                        | 2.123                          | 464.44             | 986.20             | 4.067                          | 405.43             | 1648.96            |
| A_68_P20905056 | chr1:187941218-187941262                          | NM_146106:-51      | Lyp1al1    | PROMOTER               | 1.575                                                        | 3.364                          | 1318.19            | 4435.03            | 5.298                          | 1030.23            | 5457.80            |
| A_68_P27812425 | chr11:54674397-54674456                           | NM_029327:-333     | Lymr7      | DIVERGENT_PROMOTER     | 1.856                                                        | 6.650                          | 561.10             | 3731.56            | 12.345                         | 393.08             | 4852.51            |
| A_68_P23264212 | chr4:123341892-123341936                          | NM_001199136:19689 | Macf1      | INSIDE                 | 1.835                                                        | 6.225                          | 2756.08            | 17155.80           | 11.422                         | 2142.75            | 24474.07           |
| A_68_P23264207 | chr4:123341175-123341219                          | NM_001199136:20407 | Macf1      | INSIDE                 | 1.601                                                        | 2.225                          | 1197.98            | 2665.43            | 3.563                          | 1057.07            | 3766.45            |
| A_68_P31938321 | chr19:7239801-7239845                             | NM_134147:108565   | Macrod1    | INSIDE                 | 1.686                                                        | 7.484                          | 804.27             | 6019.42            | 12.615                         | 664.54             | 8383.14            |
| A_68_P31938323 | chr19:7240213-7240257                             | NM_134147:108977   | Macrod1    | INSIDE                 | 1.683                                                        | 3.757                          | 3541.01            | 13303.16           | 6.324                          | 2898.79            | 18332.07           |
| A_68_P21683849 | chr2:140221825-140221869                          | NM_028387:676      | Macrod2    | INSIDE                 | 1.871                                                        | 6.341                          | 1384.22            | 8776.69            | 11.861                         | 1025.84            | 12167.25           |
| A_68_P23588236 | chr5:33678555-33678599                            | NM_021500:356      | Maea       | INSIDE                 | 1.609                                                        | 5.083                          | 3030.57            | 15404.30           | 8.177                          | 2515.92            | 20572.74           |
| A_68_P30343819 | chr15:75578604-75578648                           | NM_194350:-274     | Mafa       | PROMOTER               | 1.953                                                        | 3.653                          | 1220.29            | 4457.21            | 7.135                          | 915.27             | 6530.09            |
| A_68_P21583618 | chr2:121781814-121781858                          | NM_008545:-8       | Mageb3     | DIVERGENT_PROMOTER     | 1.606                                                        | 1.769                          | 3483.81            | 6162.50            | 2.841                          | 2685.15            | 7628.37            |
| A_68_P32742983 | chrX:147247480-147247524                          | NM_001199246:744   | Maged2     | INSIDE                 | 2.161                                                        | 4.903                          | 2403.16            | 11783.38           | 10.596                         | 1585.60            | 16800.76           |
| A_68_P32751751 | chrX:149472100-149472144                          | NM_023788:-16      | Mageh1     | PROMOTER               | 2.079                                                        | 7.842                          | 12021.86           | 94269.69           | 16.303                         | 7384.41            | 120391.60          |
| A_68_P24656000 | chr6:94233185-94233229                            | NM_001029850:692   | Magi1      | INSIDE                 | 1.546                                                        | 1.641                          | 4535.04            | 7442.85            | 2.537                          | 3708.37            | 9406.35            |
| A_68_P23513990 | chr5:18732536-18732580                            | NM_001170746:-305  | Magi2      | PROMOTER               | 2.216                                                        | 6.205                          | 10538.73           | 65397.65           | 13.752                         | 8258.67            | 113576.80          |
| A_68_P23513989 | chr5:18732427-18732471                            | NM_001170746:-415  | Magi2      | PROMOTER               | 1.729                                                        | 5.351                          | 1454.92            | 7784.77            | 9.253                          | 1263.72            | 11692.73           |
| A_68_P32582402 | chrX:103206930-103206974                          | NM_001190409:286   | Magt1      | INSIDE                 | 1.915                                                        | 1.775                          | 471.25             | 836.39             | 3.398                          | 285.08             | 968.83             |
| A_68_P31930914 | chr19:5803350-5803394                             | NR_002847:-701     | Malat1     | PROMOTER               | 1.587                                                        | 2.239                          | 2534.95            | 5676.06            | 3.553                          | 1910.89            | 6790.18            |
| A_68_P31781218 | chr18:65590541-65590585                           | NM_172833:-88      | Malt1      | PROMOTER               | 1.801                                                        | 4.774                          | 13185.43           | 62940.98           | 8.596                          | 9108.70            | 78301.18           |
| A_68_P31781216 | chr18:65590296-65590340                           | NM_172833:-332     | Malt1      | PROMOTER               | 1.611                                                        | 4.275                          | 3911.10            | 16718.62           | 6.885                          | 2564.32            | 17654.60           |
| A_68_P27787812 | chr11:50105519-50105563                           | NM_175334:298      | Maml1      | INSIDE                 | 1.613                                                        | 3.738                          | 461.82             | 1726.44            | 6.031                          | 391.72             | 2362.56            |
| A_68_P27787814 | chr11:50105808-50105852                           | NM_175334:8        | Maml1      | INSIDE                 | 1.583                                                        | 2.825                          | 2008.46            | 5672.99            | 4.471                          | 1575.17            | 7043.18            |
| A_68_P22133096 | chr3:51811618-51811662                            | NM_001004176:97288 | Maml3      | INSIDE                 | 1.764                                                        | 4.761                          | 566.37             | 2696.29            | 8.396                          | 443.15             | 3720.85            |
| A_68_P23324350 | chr4:134260533-134260577                          | NM_207237:-349     | Man1c1     | PROMOTER               | 2.820                                                        | 6.404                          | 6070.41            | 38876.71           | 18.062                         | 3941.66            | 71192.51           |
| A_68_P23609897 | chr5:37221748-37221792                            | NM_008550:118      | Man2b2     | INSIDE                 | 1.775                                                        | 2.479                          | 395.33             | 980.03             | 4.399                          | 374.60             | 1648.01            |
| A_68_P21764750 | chr2:155102799-155102843                          | NM_025735:641      | Map1lc3a   | INSIDE                 | 1.535                                                        | 2.782                          | 4218.66            | 11735.73           | 4.269                          | 3229.90            | 13789.31           |
| A_68_P29330800 | chr13:112598036-112598080                         | NM_011945:1133     | Map3k1     | INSIDE                 | 1.925                                                        | 3.844                          | 1210.59            | 4652.97            | 7.400                          | 1025.67            | 7589.61            |
| A_68_P29330804 | chr13:112598387-112598431                         | NM_011945:783      | Map3k1     | INSIDE                 | 1.523                                                        | 2.477                          | 2532.55            | 6272.51            | 3.773                          | 2203.81            | 8314.87            |
| A_68_P32777676 | chrX:156426760-156426804                          | NM_001163085:418   | Map3k15    | INSIDE                 | 1.601                                                        | 3.482                          | 3434.14            | 11957.67           | 5.574                          | 2209.75            | 12316.96           |
| A_68_P28099478 | chr11:105946211-105946255                         | NM_011947:17       | Map3k3     | INSIDE                 | 2.617                                                        | 6.441                          | 23400.69           | 150731.30          | 16.857                         | 15983.49           | 269440.70          |
| A_68_P26983892 | chr10:19653936-19653980                           | NM_008580:-373     | Map3k5     | PROMOTER               | 1.941                                                        | 2.801                          | 2266.02            | 6346.81            | 5.436                          | 1777.92            | 9664.64            |
| A_68_P26983894 | chr10:19654073-19654117                           | NM_008580:-237     | Map3k5     | PROMOTER               | 1.908                                                        | 4.715                          | 1137.39            | 5362.66            | 8.995                          | 869.16             | 7818.51            |
| A_68_P26983891 | chr10:19653749-19653793                           | NM_008580:-561     | Map3k5     | PROMOTER               | 1.620                                                        | 1.830                          | 1693.83            | 3099.84            | 2.964                          | 1458.46            | 4322.90            |
| A_68_P23316515 | chr4:132797012-132797056                          | NM_016693:302      | Map3k6     | INSIDE                 | 1.601                                                        | 3.752                          | 940.36             | 3528.30            | 6.005                          | 814.28             | 4889.99            |
| A_68_P20168277 | chr1:39957569-39957613                            | NM_008696:-167     | Map4k4     | PROMOTER               | 1.739                                                        | 6.591                          | 1829.38            | 12056.65           | 11.462                         | 1482.10            | 16987.39           |
| A_68_P30571313 | chr16:16983889-16983933                           | NM_001038663:436   | Mapk1      | INSIDE                 | 1.524                                                        | 2.580                          | 3619.05            | 9335.38            | 3.932                          | 2928.64            | 11514.79           |
| A_68_P30423478 | chr15:88979773-88979817                           | NM_011161:242      | Mapk11     | INSIDE                 | 1.578                                                        | 2.423                          | 2470.96            | 5987.54            | 3.823                          | 2005.79            | 7668.84            |
| A_68_P30345384 | chr15:75829239-75829283                           | NM_177922:5062     | Mapk15     | INSIDE                 | 1.663                                                        | 2.283                          | 1737.25            | 3965.36            | 3.796                          | 1347.49            | 5115.13            |
| A_68_P26643861 | chr9:75257109-75257153                            | NM_027418:36       | Mapk6      | INSIDE                 | 1.752                                                        | 6.242                          | 804.80             | 5023.46            | 10.938                         | 682.80             | 7468.18            |
| A_68_P21428205 | chr2:92229093-92229137                            | NM_001202445:3726  | Mapk8ip1   | INSIDE                 | 1.608                                                        | 1.807                          | 2330.81            | 4212.43            | 2.905                          | 1815.98            | 5275.98            |
| A_68_P31100482 | chr17:25073578-25073622                           | NM_001163447:322   | Mapk8ip3   | INSIDE                 | 2.063                                                        | 1.495                          | 880.29             | 1315.95            | 3.084                          | 628.83             | 1939.61            |
| A_68_P31556965 | chr18:23962258-23962302                           | NM_153058:-190     | Mapre2     | PROMOTER               | 1.583                                                        | 2.325                          | 1721.23            | 4002.09            | 3.681                          | 1225.12            | 4510.15            |
| A_68_P28089851 | chr11:104093898-104093942                         | NM_001038609:1171  | Mapt       | INSIDE                 | 1.518                                                        | 3.201                          | 2664.13            | 8526.89            | 4.858                          | 2303.11            | 11189.67           |
| A_68_P31150250 | chr17:33855758-33855802                           | NM_145486:-165     | Marchf2    | PROMOTER               | 1.649                                                        | 2.933                          | 2568.68            | 7532.69            | 4.837                          | 2197.27            | 10627.10           |
| A_68_P20337461 | chr1:72582629-72582673                            | NM_001045533:488   | Marchf4    | INSIDE                 | 2.205                                                        | 8.769                          | 4635.05            | 40642.45           | 19.337                         | 3125.23            | 60432.55           |
| A_68_P30114905 | chr15:31461133-31461177                           | NM_172606:-362     | Marchf6    | PROMOTER               | 1.939                                                        | 1.837                          | 568.10             | 1043.48            | 3.561                          | 476.87             | 1698.37            |
| A_68_P30114898 | chr15:31460199-31460243                           | NM_172606:572      | Marchf6    | INSIDE                 | 1.566                                                        | 1.520                          | 2694.46            | 4094.33            | 2.380                          | 2251.11            | 5357.45            |

| ProbeName      | Target position of probe on CpG island microarray | TargetID          | GeneSymbol | CpG island Description | Ratio of relative methylation (TiO <sub>2</sub> -NP/Vehicle) | Sham group                     |                    |                    | TiO <sub>2</sub> -H group      |                    |                    |
|----------------|---------------------------------------------------|-------------------|------------|------------------------|--------------------------------------------------------------|--------------------------------|--------------------|--------------------|--------------------------------|--------------------|--------------------|
|                |                                                   |                   |            |                        |                                                              | Relative methylation (Cy5/Cy3) | Cy3 signal (Input) | Cy5 signal (MeDIP) | Relative methylation (Cy5/Cy3) | Cy3 signal (Input) | Cy5 signal (MeDIP) |
| A_68_P21257003 | chr2:60047554-60047598                            | NM_020575:-416    | March7     | PROMOTER               | 1.702                                                        | 2.127                          | 1773.27            | 3772.14            | 3.621                          | 1423.23            | 5153.13            |
| A_68_P23297033 | chr4:129190774-129190818                          | NM_010807:-28     | Marcks1    | PROMOTER               | 2.602                                                        | 5.773                          | 10432.74           | 60230.91           | 15.025                         | 7036.61            | 105722.20          |
| A_68_P23297034 | chr4:129190844-129190888                          | NM_010807:42      | Marcks1    | INSIDE                 | 2.238                                                        | 6.078                          | 31663.01           | 192442.20          | 13.600                         | 21299.62           | 289684.00          |
| A_68_P31939393 | chr19:7416055-7416099                             | NM_001080388:258  | Mark2      | INSIDE                 | 1.581                                                        | 2.657                          | 5515.08            | 14651.84           | 4.199                          | 4403.33            | 18491.38           |
| A_68_P32119294 | chr19:42222686-42222730                           | NM_183195:830     | Marveld1   | INSIDE                 | 1.677                                                        | 1.867                          | 2718.81            | 5074.92            | 3.130                          | 2118.62            | 6630.74            |
| A_68_P25954148 | chr8:73321826-73321870                            | NM_199308:-5516   | Mast3      | PROMOTER               | 1.698                                                        | 3.752                          | 5167.04            | 19388.07           | 6.371                          | 3777.88            | 24067.35           |
| A_68_P24541704 | chr6:72389176-72389220                            | NM_145569:354     | Mat2a      | INSIDE                 | 1.776                                                        | 3.581                          | 1968.78            | 7050.07            | 6.361                          | 1773.17            | 11279.90           |
| A_68_P24541702 | chr6:72388860-72388904                            | NM_145569:670     | Mat2a      | INSIDE                 | 1.602                                                        | 2.735                          | 1124.77            | 3076.39            | 4.383                          | 983.64             | 4311.30            |
| A_68_P27288382 | chr10:80720130-80720174                           | NM_010768:-137    | Matk       | PROMOTER               | 1.787                                                        | 7.778                          | 2735.01            | 21273.82           | 13.898                         | 2288.70            | 31808.01           |
| A_68_P30127809 | chr15:34236397-34236441                           | NM_016762:-17     | Matn2      | PROMOTER               | 1.703                                                        | 2.565                          | 3731.02            | 9571.39            | 4.369                          | 2799.86            | 12232.50           |
| A_68_P31618899 | chr18:35721824-35721868                           | NM_010771:35      | Matr3      | INSIDE                 | 2.459                                                        | 1.495                          | 1916.90            | 2865.17            | 3.676                          | 1857.74            | 6829.22            |
| A_68_P28915541 | chr13:30228560-30228604                           | NM_153546:224     | Mboat1     | INSIDE                 | 1.716                                                        | 4.650                          | 5057.74            | 23518.34           | 7.979                          | 3984.22            | 31790.67           |
| A_68_P28291793 | chr12:25515677-25515721                           | NM_001083341:-765 | Mboat2     | PROMOTER               | 1.745                                                        | 14.968                         | 1756.93            | 26296.92           | 26.116                         | 1229.01            | 32097.13           |
| A_68_P24946816 | chr7:3637239-3637283                              | NM_029934:7867    | Mboat7     | INSIDE                 | 1.956                                                        | 4.635                          | 2593.16            | 12018.65           | 9.064                          | 2031.67            | 18415.71           |
| A_68_P24946817 | chr7:3637393-3637437                              | NM_029934:7713    | Mboat7     | INSIDE                 | 1.733                                                        | 4.064                          | 2244.83            | 9124.02            | 7.046                          | 1661.51            | 11706.57           |
| A_68_P28029575 | chr11:93747831-93747875                           | NM_134012:320     | Mbt1       | INSIDE                 | 1.789                                                        | 4.285                          | 2190.93            | 9388.97            | 7.668                          | 1775.23            | 13611.80           |
| A_68_P26214707 | chr8:122082424-122082468                          | NM_001167910:215  | Mbtps1     | INSIDE                 | 1.636                                                        | 3.018                          | 10827.35           | 32676.37           | 4.939                          | 9094.19            | 44912.50           |
| A_68_P26465911 | chr9:43943262-43943306                            | NM_023061:544     | Mcam       | INSIDE                 | 2.490                                                        | 3.450                          | 1701.35            | 5869.09            | 8.589                          | 1308.16            | 11235.64           |
| A_68_P31668416 | chr18:44821733-44821777                           | NM_001085374:166  | Mcc        | INSIDE                 | 1.523                                                        | 3.694                          | 1617.21            | 5974.76            | 5.627                          | 1172.44            | 6597.50            |
| A_68_P29266707 | chr13:100785592-100785636                         | NM_030026:-20     | Mccc2      | PROMOTER               | 1.618                                                        | 1.916                          | 809.86             | 1551.88            | 3.100                          | 610.66             | 1893.18            |
| A_68_P24624872 | chr6:88848652-88848696                            | NM_008564:100     | Mcm2       | INSIDE                 | 1.723                                                        | 2.710                          | 2143.08            | 5807.63            | 4.668                          | 1669.78            | 7794.48            |
| A_68_P31161218 | chr17:35978447-35978494                           | NM_001010833:28   | Mdc1       | INSIDE                 | 2.063                                                        | 6.398                          | 6929.61            | 44333.91           | 13.196                         | 5328.21            | 70309.10           |
| A_68_P31130464 | chr17:30025085-30025129                           | NM_001081160:-279 | Mdga1      | PROMOTER               | 1.818                                                        | 4.836                          | 2874.13            | 13899.56           | 8.792                          | 2325.88            | 20449.59           |
| A_68_P31130455 | chr17:30024049-30024093                           | NM_001081160:757  | Mdga1      | INSIDE                 | 1.738                                                        | 2.851                          | 1712.55            | 4882.18            | 4.954                          | 1318.07            | 6529.20            |
| A_68_P23272064 | chr4:124762396-124762440                          | NM_027310:28      | Meaf6      | INSIDE                 | 2.105                                                        | 4.439                          | 2277.95            | 10112.16           | 9.343                          | 1719.31            | 16064.02           |
| A_68_P22028773 | chr3:30407847-30407891                            | NM_021442:541     | Mecom      | INSIDE                 | 2.882                                                        | 13.646                         | 2919.90            | 39844.77           | 39.327                         | 2080.76            | 81830.92           |
| A_68_P22028775 | chr3:30408163-30408207                            | NM_021442:225     | Mecom      | INSIDE                 | 1.615                                                        | 3.398                          | 2128.39            | 7231.49            | 5.487                          | 1792.28            | 9834.61            |
| A_68_P22028771 | chr3:30407557-30407601                            | NM_021442:831     | Mecom      | INSIDE                 | 1.619                                                        | 1.748                          | 767.78             | 1342.21            | 2.830                          | 672.06             | 1901.65            |
| A_68_P24027251 | chr5:119010546-119010590                          | NM_172424:-159    | Med131     | PROMOTER               | 1.689                                                        | 4.857                          | 1353.13            | 6571.65            | 8.204                          | 1178.58            | 9668.76            |
| A_68_P32263512 | chrX:12339036-12339080                            | NM_001048208:41   | Med14      | INSIDE                 | 2.302                                                        | 6.479                          | 885.86             | 5739.19            | 14.914                         | 563.91             | 8410.04            |
| A_68_P27011028 | chr10:24589929-24589973                           | NM_001166416:159  | Med23      | INSIDE                 | 1.548                                                        | 4.361                          | 469.79             | 2048.95            | 6.752                          | 420.87             | 2841.82            |
| A_68_P25962045 | chr8:75071657-75071701                            | NM_027485:531     | Med26      | INSIDE                 | 1.527                                                        | 2.995                          | 3341.21            | 10006.22           | 4.572                          | 2633.69            | 12040.27           |
| A_68_P27910209 | chr11:72028885-72028929                           | NM_026068:188     | Med31      | INSIDE                 | 1.765                                                        | 1.777                          | 736.61             | 1308.89            | 3.136                          | 608.92             | 1909.51            |
| A_68_P23006650 | chr4:70195415-70195459                            | NM_172694:526     | Megf9      | INSIDE                 | 1.975                                                        | 3.715                          | 8274.32            | 30737.56           | 7.336                          | 6416.84            | 47074.16           |
| A_68_P31350850 | chr17:74695143-74695187                           | NM_133771:-961    | Memo1      | PROMOTER               | 5.241                                                        | 2.878                          | 450.72             | 1297.15            | 15.083                         | 368.81             | 5562.66            |
| A_68_P25285303 | chr7:91032985-91033029                            | NM_030705:-155    | Mesdc1     | DIVERGENT_PROMOTER     | 1.623                                                        | 2.693                          | 480.29             | 1293.34            | 4.369                          | 553.86             | 2419.97            |
| A_68_P25263207 | chr7:86938148-86938192                            | NM_008588:306     | Mesp1      | INSIDE                 | 2.066                                                        | 1.675                          | 913.13             | 1529.48            | 3.460                          | 931.29             | 3222.05            |
| A_68_P31106324 | chr17:25934049-25934093                           | NM_133719:-80     | Metm       | PROMOTER               | 1.626                                                        | 2.274                          | 1344.63            | 3058.13            | 3.697                          | 1092.50            | 4039.16            |
| A_68_P20778372 | chr1:164478561-164478605                          | NM_144877:-106    | Mettl13    | PROMOTER               | 1.791                                                        | 2.885                          | 7977.41            | 23018.06           | 5.169                          | 5991.19            | 30966.64           |
| A_68_P22487800 | chr3:123088652-123088696                          | NM_201638:234     | Mettl14    | INSIDE                 | 2.281                                                        | 7.737                          | 8006.62            | 61947.64           | 17.649                         | 5831.80            | 102926.20          |
| A_68_P28515346 | chr12:70683995-70684039                           | NM_001033236:-1   | Mettl21d   | PROMOTER               | 1.574                                                        | 3.709                          | 1807.51            | 6704.49            | 5.840                          | 1491.54            | 8710.42            |
| A_68_P29605899 | chr14:52924704-52924752                           | NM_019721:71      | Mettl3     | INSIDE                 | 1.560                                                        | 3.087                          | 740.61             | 2286.38            | 4.816                          | 590.71             | 2845.04            |
| A_68_P25471703 | chr7:128178649-128178693                          | NM_021554:712     | Mettl9     | INSIDE                 | 1.607                                                        | 8.648                          | 1551.29            | 13416.01           | 13.900                         | 1343.46            | 18673.87           |
| A_68_P25279941 | chr7:90014673-90014717                            | NM_175366:-1148   | Mex3b      | PROMOTER               | 2.224                                                        | 5.070                          | 4959.03            | 25142.20           | 11.274                         | 3753.77            | 42319.18           |
| A_68_P30497013 | chr15:102110024-102110068                         | NM_134100:160     | Mfsd5      | INSIDE                 | 1.755                                                        | 10.569                         | 1150.96            | 12164.70           | 18.546                         | 955.38             | 17718.13           |
| A_68_P20173639 | chr1:40847463-40847507                            | NM_172499:18      | Mfsd9      | INSIDE                 | 1.962                                                        | 7.038                          | 1091.71            | 7683.65            | 13.809                         | 885.85             | 12232.37           |
| A_68_P27787453 | chr11:50044668-50044712                           | NM_145926:5854    | Mgat4b     | INSIDE                 | 2.071                                                        | 2.420                          | 1573.74            | 3808.69            | 5.012                          | 1234.71            | 6187.88            |



| ProbeName      | Target position of probe on CpG island microarray | TargetID           | GeneSymbol | CpG island Description | Ratio of relative methylation (TiO <sub>2</sub> -NP/Vehicle) | Sham group                     |                    |                    | TiO <sub>2</sub> -H group      |                    |                    |
|----------------|---------------------------------------------------|--------------------|------------|------------------------|--------------------------------------------------------------|--------------------------------|--------------------|--------------------|--------------------------------|--------------------|--------------------|
|                |                                                   |                    |            |                        |                                                              | Relative methylation (Cy5/Cy3) | Cy3 signal (Input) | Cy5 signal (MeDIP) | Relative methylation (Cy5/Cy3) | Cy3 signal (Input) | Cy5 signal (MeDIP) |
| A_68_P28162003 | chr11:116780529-116780573                         | NM_172948:374      | Mgat5b     | INSIDE                 | 1.512                                                        | 1.990                          | 423.87             | 843.57             | 3.008                          | 438.90             | 1320.33            |
| A_68_P32140500 | chr19:45857855-45857899                           | NM_023799:-95      | Mgea5      | PROMOTER               | 1.983                                                        | 7.289                          | 757.01             | 5518.17            | 14.456                         | 564.55             | 8161.40            |
| A_68_P32140499 | chr19:45857773-45857817                           | NM_023799:-13      | Mgea5      | PROMOTER               | 1.666                                                        | 6.837                          | 801.80             | 5481.57            | 11.390                         | 704.42             | 8023.62            |
| A_68_P24623660 | chr6:88674554-88674598                            | NM_001166250:-121  | Mgll1      | PROMOTER               | 1.687                                                        | 7.609                          | 2563.93            | 19509.59           | 12.836                         | 2246.95            | 28842.34           |
| A_68_P23439858 | chr4:155028864-155028908                          | NM_145124:14450    | Mib2       | INSIDE                 | 1.576                                                        | 1.782                          | 3808.57            | 6788.31            | 2.808                          | 2786.77            | 7826.64            |
| A_68_P32823846 | chrX:166435801-166435845                          | NM_183151:118269   | Mid1       | DOWNSTREAM             | 1.500                                                        | 1.929                          | 3218.86            | 6210.66            | 2.895                          | 3388.99            | 9809.69            |
| A_68_P27281299 | chr10:79613231-79613275                           | NM_021565:2218     | Midn       | INSIDE                 | 1.595                                                        | 1.942                          | 729.15             | 1415.90            | 3.097                          | 609.84             | 1888.57            |
| A_68_P23164325 | chr4:102787321-102787365                          | NM_001039081:-4652 | Mier1      | PROMOTER               | 2.136                                                        | 7.582                          | 18637.64           | 141316.60          | 16.193                         | 13089.85           | 211962.50          |
| A_68_P29330297 | chr13:112515612-112515656                         | NM_172593:39249    | Mier3      | DOWNSTREAM             | 1.948                                                        | 3.136                          | 4485.94            | 14066.93           | 6.108                          | 3426.27            | 20927.12           |
| A_68_P32070425 | chr19:32560187-32560231                           | NM_010799:-50      | Minpp1     | PROMOTER               | 1.509                                                        | 2.151                          | 1498.34            | 3223.34            | 3.247                          | 1254.33            | 4072.98            |
| A_68_P29668497 | chr14:65206255-65206299                           | NR_029813:-3217    | Mir124a-1  | PROMOTER               | 1.604                                                        | 3.902                          | 7366.35            | 28747.14           | 6.258                          | 4975.08            | 31133.68           |
| A_68_P21906908 | chr2:180628801-180628845                          | NR_029538:78       | Mir124a-3  | DOWNSTREAM             | 2.003                                                        | 1.584                          | 457.25             | 724.51             | 3.173                          | 393.78             | 1249.64            |
| A_68_P26018642 | chr8:86707908-86707952                            | NR_029821:-5070    | Mir181c    | PROMOTER               | 1.767                                                        | 5.718                          | 2600.84            | 14870.92           | 10.102                         | 2267.63            | 22907.50           |
| A_68_P26345157 | chr9:20837581-20837625                            | NR_035438:-830     | Mir190     | PROMOTER               | 1.532                                                        | 2.271                          | 1080.63            | 2454.17            | 3.479                          | 904.14             | 3145.28            |
| A_68_P27950601 | chr11:79525364-79525408                           | NR_029579:-84      | Mir193     | PROMOTER               | 1.738                                                        | 2.793                          | 2055.00            | 5739.78            | 4.854                          | 1642.00            | 7969.79            |
| A_68_P26134826 | chr8:108129362-108129406                          | NR_035492:-9981    | Mir196     | PROMOTER               | 1.788                                                        | 3.411                          | 2337.21            | 7972.16            | 6.098                          | 1612.29            | 9831.01            |
| A_68_P21114610 | chr2:32168059-32168103                            | NR_029811:-5899    | Mir199b    | PROMOTER               | 2.090                                                        | 4.476                          | 10196.84           | 45644.87           | 9.354                          | 6842.97            | 64010.85           |
| A_68_P21114609 | chr2:32167955-32167999                            | NR_029811:-6003    | Mir199b    | PROMOTER               | 1.614                                                        | 5.640                          | 16942.30           | 95558.65           | 9.104                          | 11346.08           | 103293.50          |
| A_68_P28748036 | chr12:113368595-113368639                         | NR_029590:-474     | Mir203     | PROMOTER               | 1.787                                                        | 2.450                          | 281.02             | 688.43             | 4.378                          | 193.24             | 845.98             |
| A_68_P27365819 | chr10:95026630-95026674                           | NR_037212:-4697    | Mir3058    | PROMOTER               | 1.664                                                        | 4.466                          | 7057.96            | 31523.23           | 7.434                          | 6155.54            | 45758.67           |
| A_68_P22312502 | chr3:88018703-88018747                            | NR_037276:-368     | Mir3093    | PROMOTER               | 1.852                                                        | 2.529                          | 1938.75            | 4903.30            | 4.684                          | 1457.09            | 6825.26            |
| A_68_P25015934 | chr7:27963629-27963673                            | NR_037283:-2540    | Mir3101    | PROMOTER               | 1.768                                                        | 3.211                          | 11134.92           | 35755.86           | 5.678                          | 7580.22            | 43038.60           |
| A_68_P24135185 | chr5:139847981-139848025                          | NR_029768:-2303    | Mir339     | DIVERGENT_PROMOTER     | 1.604                                                        | 3.796                          | 2433.75            | 9238.48            | 6.087                          | 2046.61            | 12458.24           |
| A_68_P32240004 | chrX:7327982-7328026                              | NR_030454:-2210    | Mir684-1   | DIVERGENT_PROMOTER     | 2.296                                                        | 3.799                          | 1605.13            | 6098.03            | 8.723                          | 894.64             | 7803.66            |
| A_68_P29613302 | chr14:55236499-55236543                           | NR_030457:-898     | Mir686     | PROMOTER               | 1.723                                                        | 4.302                          | 368.61             | 1585.89            | 7.412                          | 316.57             | 2346.51            |
| A_68_P22481653 | chr3:121996304-121996348                          | NR_030439:295      | Mir760     | DOWNSTREAM             | 2.249                                                        | 3.528                          | 297.41             | 1049.11            | 7.933                          | 238.92             | 1895.23            |
| A_68_P22481656 | chr3:121996594-121996638                          | NR_030439:5        | Mir760     | INSIDE                 | 1.849                                                        | 3.682                          | 1919.95            | 7068.63            | 6.809                          | 1611.73            | 10973.93           |
| A_68_P25261466 | chr7:86650289-86650333                            | NR_029818:161      | Mir9-3     | DOWNSTREAM             | 1.638                                                        | 2.324                          | 2376.34            | 5523.69            | 3.807                          | 2028.31            | 7722.67            |
| A_68_P25261383 | chr7:86640870-86640922                            | NR_029818:-9253    | Mir9-3     | PROMOTER               | 1.520                                                        | 4.997                          | 818.01             | 4087.90            | 7.595                          | 655.17             | 4976.12            |
| A_68_P29020011 | chr13:48641397-48641441                           | NR_029725:-7777    | Mirlet7a-1 | PROMOTER               | 2.016                                                        | 5.034                          | 3588.40            | 18065.04           | 10.151                         | 2852.00            | 28949.53           |
| A_68_P30556199 | chr16:13256418-13256462                           | NM_001122667:-133  | Mkl2       | PROMOTER               | 1.806                                                        | 2.014                          | 1559.34            | 3140.77            | 3.637                          | 1310.82            | 4767.44            |
| A_68_P30556205 | chr16:13257041-13257085                           | NM_181860:-8109    | Mkl2       | PROMOTER               | 1.574                                                        | 4.312                          | 4838.93            | 20866.87           | 6.790                          | 3944.61            | 26782.12           |
| A_68_P24337499 | chr6:31349464-31349508                            | NM_013791:659      | Mkln1      | INSIDE                 | 1.619                                                        | 4.490                          | 3001.53            | 13477.04           | 7.271                          | 2353.24            | 17110.24           |
| A_68_P24337493 | chr6:31348815-31348859                            | NM_013791:9        | Mkln1      | INSIDE                 | 1.517                                                        | 7.206                          | 1344.21            | 9686.86            | 10.934                         | 1148.97            | 12562.71           |
| A_68_P24383009 | chr6:39369612-39369656                            | NM_018810:734      | Mkml1      | INSIDE                 | 1.773                                                        | 4.571                          | 1184.49            | 5414.21            | 8.105                          | 871.42             | 7062.48            |
| A_68_P21038125 | chr2:17987169-17987213                            | NM_010804:10293    | Mllt10     | INSIDE                 | 1.513                                                        | 2.283                          | 1455.18            | 3322.77            | 3.454                          | 1218.79            | 4209.49            |
| A_68_P28051873 | chr11:97521768-97521812                           | NM_139311:-2935    | Mllt6      | PROMOTER               | 1.592                                                        | 4.326                          | 636.54             | 2753.65            | 6.886                          | 596.03             | 4104.36            |
| A_68_P24089922 | chr5:130089988-130090034                          | NM_011846:-78      | Mmp17      | PROMOTER               | 2.386                                                        | 10.764                         | 5163.23            | 55575.58           | 25.684                         | 3039.76            | 78072.02           |
| A_68_P23439842 | chr4:155027173-155027217                          | NM_011985:299      | Mmp23      | INSIDE                 | 1.548                                                        | 1.467                          | 1762.94            | 2585.39            | 2.270                          | 1420.78            | 3224.59            |
| A_68_P23985683 | chr5:111849467-111849511                          | NM_001081235:2303  | Mnl1       | INSIDE                 | 1.716                                                        | 3.154                          | 537.33             | 1694.76            | 5.412                          | 481.21             | 2604.08            |
| A_68_P23985664 | chr5:111847445-111847489                          | NM_001081235:281   | Mnl1       | INSIDE                 | 1.589                                                        | 4.139                          | 2050.83            | 8487.53            | 6.574                          | 1625.04            | 10683.59           |
| A_68_P27922756 | chr11:74651953-74651997                           | NM_010813:7549     | Mnt        | INSIDE                 | 1.688                                                        | 2.764                          | 2511.91            | 6941.73            | 4.665                          | 2144.68            | 10004.52           |
| A_68_P27922751 | chr11:74651412-74651456                           | NM_010813:7009     | Mnt        | INSIDE                 | 1.608                                                        | 4.731                          | 2325.84            | 11002.83           | 7.608                          | 1797.06            | 13671.47           |
| A_68_P23567791 | chr5:29805138-29805182                            | NM_019944:-150     | Mnx1       | PROMOTER               | 2.737                                                        | 4.281                          | 2107.37            | 9020.61            | 11.717                         | 1689.85            | 19799.24           |
| A_68_P23873662 | chr5:89150059-89150103                            | NM_026735:185      | Mobkl1a    | INSIDE                 | 2.246                                                        | 6.208                          | 3024.03            | 18774.60           | 13.943                         | 2380.22            | 33186.33           |
| A_68_P23873660 | chr5:89149794-89149838                            | NM_026735:-79      | Mobkl1a    | PROMOTER               | 1.781                                                        | 1.972                          | 1492.65            | 2944.13            | 3.513                          | 1281.13            | 4500.88            |
| A_68_P24592782 | chr6:83275935-83275979                            | NM_145571:-76      | Mobkl1b    | DIVERGENT_PROMOTER     | 1.671                                                        | 2.406                          | 1230.29            | 2959.67            | 4.021                          | 999.48             | 4018.65            |

| ProbeName      | Target position of probe on CpG island microarray | TargetID          | GeneSymbol | CpG island Description | Ratio of relative methylation (TiO <sub>2</sub> -NP/Vehicle) | Sham group                     |                    |                    | TiO <sub>2</sub> -H group      |                    |                    |
|----------------|---------------------------------------------------|-------------------|------------|------------------------|--------------------------------------------------------------|--------------------------------|--------------------|--------------------|--------------------------------|--------------------|--------------------|
|                |                                                   |                   |            |                        |                                                              | Relative methylation (Cy5/Cy3) | Cy3 signal (Input) | Cy5 signal (MeDIP) | Relative methylation (Cy5/Cy3) | Cy3 signal (Input) | Cy5 signal (MeDIP) |
| A_68_P20240462 | chr1:55188131-55188175                            | NM_025283:64      | Mobk13     | INSIDE                 | 2.583                                                        | 1.455                          | 1093.20            | 1591.01            | 3.759                          | 1044.28            | 3925.12            |
| A_68_P26811667 | chr9:107803499-107803544                          | NM_028369:13062   | Mon1a      | INSIDE                 | 1.630                                                        | 6.893                          | 1343.62            | 9261.42            | 11.234                         | 1132.45            | 12721.99           |
| A_68_P27512350 | chr10:122513515-122513559                         | NM_001163024:25   | Mon2       | INSIDE                 | 1.881                                                        | 4.934                          | 2975.86            | 14683.41           | 9.281                          | 2372.94            | 22023.12           |
| A_68_P27512349 | chr10:122513403-122513447                         | NM_001163024:137  | Mon2       | INSIDE                 | 1.521                                                        | 3.284                          | 2131.92            | 7000.31            | 4.995                          | 1977.70            | 9878.64            |
| A_68_P31382195 | chr17:80689441-80689485                           | NM_194269:-89     | Morn2      | PROMOTER               | 1.511                                                        | 5.017                          | 1251.41            | 6278.01            | 7.579                          | 1032.08            | 7821.99            |
| A_68_P20897790 | chr1:186669470-186669514                          | NM_133684:234     | Mosc2      | INSIDE                 | 1.840                                                        | 1.853                          | 1126.79            | 2088.49            | 3.410                          | 827.00             | 2819.66            |
| A_68_P20897789 | chr1:186669350-186669394                          | NM_133684:354     | Mosc2      | INSIDE                 | 1.567                                                        | 4.109                          | 4824.79            | 19825.41           | 6.437                          | 4411.19            | 28396.76           |
| A_68_P23051091 | chr4:81088361-81088405                            | NM_010820:327     | Mpdz       | INSIDE                 | 1.607                                                        | 3.445                          | 10469.36           | 36066.76           | 5.537                          | 8861.19            | 49066.76           |
| A_68_P31790832 | chr18:67404825-67404869                           | NM_172630:638     | Mppe1      | INSIDE                 | 1.597                                                        | 2.013                          | 1640.63            | 3302.46            | 3.214                          | 1469.60            | 4723.63            |
| A_68_P25953853 | chr8:73284695-73284739                            | NM_183170:104     | Mpv17l2    | INSIDE                 | 1.522                                                        | 3.011                          | 1073.38            | 3231.59            | 4.583                          | 912.14             | 4180.48            |
| A_68_P26764036 | chr9:99336932-99336976                            | NM_008624:177     | Mras       | INSIDE                 | 1.713                                                        | 3.924                          | 3458.26            | 13570.25           | 6.722                          | 2687.56            | 18066.21           |
| A_68_P25394537 | chr7:112959576-112959620                          | NM_025301:3       | Mrp117     | INSIDE                 | 1.884                                                        | 3.020                          | 2285.66            | 6902.31            | 5.690                          | 1763.25            | 10032.24           |
| A_68_P26344985 | chr9:20807480-20807524                            | NM_023167:322     | Mrp14      | INSIDE                 | 1.772                                                        | 1.812                          | 959.47             | 1738.23            | 3.210                          | 728.81             | 2339.48            |
| A_68_P20765302 | chr1:162125324-162125368                          | NM_025474:-44     | Mtps14     | PROMOTER               | 2.468                                                        | 10.418                         | 5914.69            | 61622.12           | 25.708                         | 3725.32            | 95770.00           |
| A_68_P27564592 | chr11:5607482-5607526                             | NM_026080:198     | Mtps24     | INSIDE                 | 1.623                                                        | 5.515                          | 638.51             | 3521.43            | 8.951                          | 525.42             | 4702.85            |
| A_68_P31157235 | chr17:35183322-35183366                           | NM_013600:207     | Msh5       | INSIDE                 | 1.554                                                        | 1.393                          | 1449.87            | 2019.11            | 2.164                          | 1177.43            | 2547.74            |
| A_68_P31425843 | chr17:88374364-88374408                           | NM_010830:-3      | Msh6       | PROMOTER               | 1.527                                                        | 1.680                          | 584.04             | 981.29             | 2.566                          | 572.71             | 1469.51            |
| A_68_P32817209 | chrX:165111905-165111949                          | NM_010832:-92     | Msl3       | PROMOTER               | 2.457                                                        | 2.364                          | 835.90             | 1976.12            | 5.809                          | 516.85             | 3002.34            |
| A_68_P29044041 | chr13:53558129-53558173                           | NM_013601:9999    | Msx2       | DOWNSTREAM             | 2.092                                                        | 5.217                          | 933.42             | 4869.21            | 10.914                         | 666.32             | 7272.46            |
| A_68_P25581950 | chr7:147234174-147234218                          | NM_010836:791     | Msx3       | INSIDE                 | 1.540                                                        | 2.192                          | 1382.25            | 3030.30            | 3.376                          | 1166.43            | 3937.96            |
| A_68_P25092690 | chr7:52622810-52622854                            | NR_027802:230     | Mtag2      | INSIDE                 | 1.876                                                        | 3.324                          | 2610.46            | 8676.44            | 6.236                          | 1965.83            | 12259.79           |
| A_68_P23094194 | chr4:88783218-88783262                            | NM_024433:-33     | Mtap       | PROMOTER               | 1.809                                                        | 3.549                          | 5045.36            | 17904.92           | 6.418                          | 3626.40            | 23275.54           |
| A_68_P25954897 | chr8:73438085-73438129                            | NM_173013:8234    | Mtap1s     | INSIDE                 | 1.559                                                        | 4.956                          | 4668.80            | 23140.70           | 7.727                          | 3349.62            | 25881.64           |
| A_68_P25954894 | chr8:73437692-73437736                            | NM_173013:7842    | Mtap1s     | INSIDE                 | 1.509                                                        | 2.762                          | 422.18             | 1166.14            | 4.169                          | 350.12             | 1459.49            |
| A_68_P25360757 | chr7:106417697-106417741                          | NM_001043355:863  | Mtap6      | INSIDE                 | 2.210                                                        | 4.630                          | 2563.91            | 11870.65           | 10.232                         | 1820.63            | 18628.00           |
| A_68_P26985109 | chr10:19868572-19868616                           | NM_001198635:-131 | Mtap7      | PROMOTER               | 1.808                                                        | 5.214                          | 1052.75            | 5489.10            | 9.426                          | 892.38             | 8411.77            |
| A_68_P22278904 | chr3:82162070-82162114                            | NM_001081230:99   | Mtap9      | INSIDE                 | 2.656                                                        | 15.147                         | 1784.01            | 27022.45           | 40.232                         | 980.84             | 39461.13           |
| A_68_P31127484 | chr17:29484749-29484793                           | NM_019880:79      | Mtch1      | INSIDE                 | 1.724                                                        | 3.035                          | 1442.67            | 4378.91            | 5.232                          | 1135.57            | 5941.51            |
| A_68_P32471622 | chrX:72661675-72661719                            | NM_010839:186     | Mtcp1      | INSIDE                 | 2.460                                                        | 3.523                          | 1439.66            | 5072.36            | 8.668                          | 783.74             | 6793.80            |
| A_68_P24592748 | chr6:83267406-83267450                            | NM_008638:170     | Mthfd2     | INSIDE                 | 1.688                                                        | 1.747                          | 2418.50            | 4225.33            | 2.950                          | 1884.64            | 5558.99            |
| A_68_P26224550 | chr8:123632450-123632508                          | NM_001166482:-199 | Mthfsd     | DIVERGENT_PROMOTER     | 2.012                                                        | 13.659                         | 8664.67            | 118351.90          | 27.485                         | 5760.48            | 158325.40          |
| A_68_P32453217 | chrX:68617827-68617871                            | NM_016985:-86     | Mtmr1      | PROMOTER               | 2.555                                                        | 3.098                          | 2572.42            | 7970.05            | 7.916                          | 1433.82            | 11349.50           |
| A_68_P25176077 | chr7:71432423-71432467                            | NM_172742:-111    | Mtmr10     | PROMOTER               | 1.672                                                        | 1.737                          | 383.89             | 666.99             | 2.905                          | 368.33             | 1070.00            |
| A_68_P30020394 | chr15:12134922-12134966                           | NM_172958:96      | Mtmr12     | INSIDE                 | 1.515                                                        | 2.637                          | 924.58             | 2437.87            | 3.993                          | 797.05             | 3182.95            |
| A_68_P26659639 | chr9:78296196-78296240                            | NM_026658:202     | Mto1       | INSIDE                 | 1.960                                                        | 1.795                          | 397.62             | 713.77             | 3.518                          | 481.25             | 1693.03            |
| A_68_P23394435 | chr4:147822699-147822743                          | NM_020009:30      | Mtor       | INSIDE                 | 1.692                                                        | 5.778                          | 2393.80            | 13830.38           | 9.777                          | 1997.31            | 19527.03           |
| A_68_P24362057 | chr6:35489865-35489909                            | NM_008098:2       | Mtpn       | INSIDE                 | 1.785                                                        | 3.996                          | 2129.43            | 8508.36            | 7.134                          | 1659.27            | 11837.30           |
| A_68_P26905236 | chr10:4522611-4522655                             | NM_175374:35      | Mtrf11     | INSIDE                 | 1.758                                                        | 3.434                          | 1637.50            | 5622.63            | 6.037                          | 1288.35            | 7777.73            |
| A_68_P26164572 | chr8:113262808-113262852                          | NM_198625:17447   | Mtss11     | INSIDE                 | 3.486                                                        | 7.191                          | 2535.96            | 18235.83           | 25.068                         | 1841.30            | 46157.41           |
| A_68_P26164573 | chr8:113262875-113262919                          | NM_198625:17513   | Mtss11     | INSIDE                 | 3.405                                                        | 4.778                          | 3372.57            | 16114.77           | 16.269                         | 2472.91            | 40232.99           |
| A_68_P26164568 | chr8:113262460-113262504                          | NM_198625:17099   | Mtss11     | INSIDE                 | 2.463                                                        | 10.638                         | 6103.81            | 64933.75           | 26.205                         | 4061.40            | 106430.50          |
| A_68_P24176699 | chr5:148769334-148769378                          | NM_029920:461     | Mtus2      | INSIDE                 | 2.000                                                        | 5.862                          | 4947.09            | 28999.70           | 11.723                         | 3794.87            | 44486.85           |
| A_68_P23345719 | chr4:137990637-137990681                          | NM_026689:72      | Mul1       | INSIDE                 | 1.580                                                        | 2.436                          | 2819.27            | 6866.86            | 3.849                          | 2247.89            | 8653.07            |
| A_68_P27281785 | chr10:79689246-79689290                           | NM_023431:-74     | Mum1       | PROMOTER               | 1.780                                                        | 3.402                          | 6975.63            | 23734.06           | 6.057                          | 5170.10            | 31312.73           |
| A_68_P28961844 | chr13:38727138-38727182                           | NM_139063:-182    | Muted      | PROMOTER               | 1.630                                                        | 1.777                          | 971.29             | 1726.20            | 2.897                          | 765.87             | 2218.59            |
| A_68_P24004046 | chr5:114894276-114894320                          | NM_023556:-16     | Mvk        | DIVERGENT_PROMOTER     | 1.837                                                        | 4.580                          | 511.99             | 2345.05            | 8.414                          | 406.64             | 3421.63            |
| A_68_P24611353 | chr6:86619098-86619142                            | NM_010751:33      | Mxd1       | INSIDE                 | 2.105                                                        | 4.756                          | 11879.78           | 56499.76           | 10.010                         | 9280.46            | 92901.41           |

| ProbeName      | Target position of probe on CpG island microarray | TargetID           | GeneSymbol | CpG island Description | Ratio of relative methylation (TiO <sub>2</sub> -NP/Vehicle) | Sham group                     |                    |                    | TiO <sub>2</sub> -H group      |                    |                    |
|----------------|---------------------------------------------------|--------------------|------------|------------------------|--------------------------------------------------------------|--------------------------------|--------------------|--------------------|--------------------------------|--------------------|--------------------|
|                |                                                   |                    |            |                        |                                                              | Relative methylation (Cy5/Cy3) | Cy3 signal (Input) | Cy5 signal (MeDIP) | Relative methylation (Cy5/Cy3) | Cy3 signal (Input) | Cy5 signal (MeDIP) |
| A_68_P29054388 | chr13:55431309-55431353                           | NM_016662:-239     | Mxd3       | PROMOTER               | 1.886                                                        | 4.408                          | 1313.53            | 5789.64            | 8.315                          | 1065.03            | 8855.45            |
| A_68_P32181854 | chr19:53403918-53403962                           | NM_001008543:-995  | Mxi1       | PROMOTER               | 1.586                                                        | 2.159                          | 1039.87            | 2244.67            | 3.423                          | 842.54             | 2884.42            |
| A_68_P20023664 | chr1:9690196-9690240                              | NM_008651:72       | Mybl1      | INSIDE                 | 2.277                                                        | 6.956                          | 950.56             | 6612.18            | 15.839                         | 788.81             | 12494.10           |
| A_68_P23260191 | chr4:122672828-122672872                          | NM_008506:-491     | Myc1       | PROMOTER               | 2.135                                                        | 12.888                         | 3988.63            | 51404.12           | 27.511                         | 2697.48            | 74210.26           |
| A_68_P28246269 | chr12:12944121-12944165                           | NM_008709:4500     | Mycn       | INSIDE                 | 1.884                                                        | 3.332                          | 931.52             | 3104.13            | 6.278                          | 767.56             | 4818.81            |
| A_68_P30356228 | chr15:77672759-77672803                           | NM_022410:-235     | Myh9       | PROMOTER               | 2.233                                                        | 5.791                          | 8131.65            | 47090.36           | 12.930                         | 5925.98            | 76623.80           |
| A_68_P30356227 | chr15:77672647-77672691                           | NM_022410:-123     | Myh9       | PROMOTER               | 1.598                                                        | 4.863                          | 5861.69            | 28505.42           | 7.773                          | 4607.92            | 35815.21           |
| A_68_P29001576 | chr13:45485361-45485405                           | NM_181043:57       | Myliip     | INSIDE                 | 1.713                                                        | 1.479                          | 1688.38            | 2496.84            | 2.533                          | 1298.46            | 3288.58            |
| A_68_P27927426 | chr11:75469605-75469649                           | NM_001080775:110   | Myo1c      | INSIDE                 | 1.501                                                        | 3.042                          | 780.85             | 2375.39            | 4.567                          | 661.02             | 3019.16            |
| A_68_P31831023 | chr18:74602569-74602613                           | NM_201600:318      | Myo5b      | INSIDE                 | 1.688                                                        | 3.289                          | 454.80             | 1495.78            | 5.552                          | 442.03             | 2454.05            |
| A_68_P25713191 | chr8:23969515-23969559                            | NM_001081149:-474  | Myst3      | PROMOTER               | 1.757                                                        | 1.557                          | 599.52             | 933.45             | 2.735                          | 404.86             | 1107.42            |
| A_68_P29453038 | chr14:22320578-22320622                           | NM_017479:1594     | Myst4      | INSIDE                 | 1.772                                                        | 10.363                         | 8250.98            | 85508.03           | 18.364                         | 5000.42            | 91827.39           |
| A_68_P29453037 | chr14:22320470-22320514                           | NM_017479:1486     | Myst4      | INSIDE                 | 1.701                                                        | 8.500                          | 7052.63            | 59950.60           | 14.457                         | 5362.66            | 77527.39           |
| A_68_P29453036 | chr14:22320298-22320342                           | NM_017479:1314     | Myst4      | INSIDE                 | 1.676                                                        | 3.472                          | 1367.44            | 4747.66            | 5.820                          | 1163.03            | 6768.46            |
| A_68_P23757989 | chr5:66155461-66155505                            | NM_001024917:723   | N4bp2      | INSIDE                 | 1.917                                                        | 2.979                          | 1575.15            | 4692.02            | 5.709                          | 1233.33            | 7041.59            |
| A_68_P29080348 | chr13:59686650-59686694                           | NM_030153:-21      | Naa35      | PROMOTER               | 2.207                                                        | 6.748                          | 1745.08            | 11775.43           | 14.893                         | 1380.05            | 20552.67           |
| A_68_P27569379 | chr11:6505657-6505701                             | NM_001081652:379   | Nacad      | INSIDE                 | 2.343                                                        | 8.268                          | 5339.75            | 44151.53           | 19.370                         | 3628.25            | 70280.29           |
| A_68_P30514378 | chr16:5203992-5204036                             | NM_013796:91       | Nagpa      | INSIDE                 | 2.028                                                        | 3.462                          | 3483.62            | 12060.51           | 7.023                          | 2716.12            | 19074.05           |
| A_68_P32226993 | chr19:60831736-60831780                           | NM_178421:-131     | Nanos1     | PROMOTER               | 2.190                                                        | 5.397                          | 11809.73           | 63740.95           | 11.823                         | 8903.57            | 105264.20          |
| A_68_P32227000 | chr19:60832730-60832774                           | NM_178421:863      | Nanos1     | INSIDE                 | 1.698                                                        | 1.374                          | 2438.63            | 3350.63            | 2.333                          | 1862.02            | 4344.11            |
| A_68_P23230189 | chr4:116299784-116299829                          | NM_001081475:296   | Nasp       | INSIDE                 | 1.555                                                        | 1.757                          | 1532.01            | 2691.16            | 2.732                          | 1330.79            | 3635.84            |
| A_68_P23230191 | chr4:116299963-116300007                          | NM_001081475:118   | Nasp       | INSIDE                 | 1.849                                                        | 1.862                          | 608.42             | 1132.81            | 3.442                          | 451.71             | 1554.89            |
| A_68_P23592057 | chr5:34343782-34343826                            | NM_001001985:5172  | Nat8l      | INSIDE                 | 2.214                                                        | 8.208                          | 19505.54           | 160108.10          | 18.177                         | 11137.08           | 202440.10          |
| A_68_P22157978 | chr3:55987140-55987184                            | NM_030595:461      | Nbea       | INSIDE                 | 1.728                                                        | 4.480                          | 1138.19            | 5099.45            | 7.741                          | 981.53             | 7598.19            |
| A_68_P22752524 | chr4:15885248-15885292                            | NM_013752:157      | Nbn        | INSIDE                 | 2.141                                                        | 2.779                          | 1457.00            | 4048.50            | 5.948                          | 1231.65            | 7325.64            |
| A_68_P22752523 | chr4:15885168-15885212                            | NM_013752:77       | Nbn        | INSIDE                 | 1.526                                                        | 2.495                          | 486.75             | 1214.43            | 3.808                          | 417.33             | 1589.30            |
| A_68_P26500013 | chr9:49606044-49606088                            | NM_001081445:1108  | Ncam1      | INSIDE                 | 2.047                                                        | 6.334                          | 6147.30            | 38938.26           | 12.967                         | 4556.04            | 59078.64           |
| A_68_P26500017 | chr9:49606485-49606529                            | NM_001081445:668   | Ncam1      | INSIDE                 | 1.857                                                        | 2.717                          | 2069.79            | 5624.12            | 5.047                          | 1608.35            | 8117.62            |
| A_68_P30424721 | chr15:89186360-89186404                           | NM_001115132:230   | Ncaph2     | INSIDE                 | 1.786                                                        | 4.363                          | 3195.59            | 13942.59           | 7.793                          | 2602.19            | 20277.78           |
| A_68_P20188961 | chr1:43503040-43503084                            | NM_010879:467      | Nck2       | INSIDE                 | 1.615                                                        | 2.269                          | 1442.39            | 3273.18            | 3.665                          | 1765.47            | 6470.17            |
| A_68_P30480085 | chr15:99256217-99256261                           | NM_001001884:31941 | Nckap51    | INSIDE                 | 1.738                                                        | 4.114                          | 1881.69            | 7740.46            | 7.150                          | 1425.95            | 10195.16           |
| A_68_P27290094 | chr10:80959100-80959144                           | NM_134009:-14      | Ncln       | PROMOTER               | 1.662                                                        | 3.944                          | 2154.24            | 8495.68            | 6.556                          | 1834.97            | 12030.15           |
| A_68_P20040932 | chr1:13363158-13363202                            | NM_001077695:984   | Ncoa2      | INSIDE                 | 1.555                                                        | 1.573                          | 1015.20            | 1596.89            | 2.446                          | 928.22             | 2270.58            |
| A_68_P21826983 | chr2:165818573-165818617                          | NM_008679:458      | Ncoa3      | INSIDE                 | 1.704                                                        | 7.206                          | 5906.37            | 42563.88           | 12.282                         | 4278.32            | 52547.31           |
| A_68_P24064307 | chr5:125507269-125507313                          | NM_011424:152294   | Ncor2      | INSIDE                 | 1.820                                                        | 5.340                          | 9566.43            | 51080.29           | 9.717                          | 7206.32            | 70024.62           |
| A_68_P30560747 | chr16:14163515-14163559                           | NM_001114085:169   | Nde1       | INSIDE                 | 2.032                                                        | 5.369                          | 18178.12           | 97589.71           | 10.906                         | 11694.21           | 127539.10          |
| A_68_P30560744 | chr16:14163261-14163305                           | NM_001114085:-85   | Nde1       | PROMOTER               | 1.513                                                        | 1.741                          | 1004.83            | 1749.37            | 2.633                          | 774.54             | 2039.73            |
| A_68_P27891735 | chr11:68666059-68666103                           | NM_023668:553      | Ndel1      | INSIDE                 | 1.505                                                        | 1.532                          | 1208.31            | 1851.00            | 2.306                          | 966.35             | 2228.04            |
| A_68_P25168663 | chr7:69493375-69493419                            | NM_010882:234      | Ndn        | INSIDE                 | 1.721                                                        | 5.983                          | 1564.06            | 9357.36            | 10.297                         | 1409.83            | 14516.67           |
| A_68_P30295269 | chr15:66800435-66800479                           | NM_008681:747      | Ndrp1      | INSIDE                 | 1.828                                                        | 6.584                          | 2811.46            | 18509.54           | 12.036                         | 2244.93            | 27019.44           |
| A_68_P29448698 | chr14:21553543-21553587                           | NM_010811:220      | Ndst2      | INSIDE                 | 1.542                                                        | 1.813                          | 339.59             | 615.81             | 2.797                          | 289.37             | 809.26             |
| A_68_P32322121 | chrX:34731184-34731228                            | NM_019443:27       | Ndufa1     | INSIDE                 | 1.603                                                        | 1.735                          | 1435.26            | 2490.36            | 2.782                          | 880.76             | 2449.86            |
| A_68_P25948620 | chr8:72427025-72427069                            | NM_023312:-589     | Ndufa13    | PROMOTER               | 1.787                                                        | 3.236                          | 714.39             | 2311.79            | 5.783                          | 683.51             | 3952.85            |
| A_68_P25948621 | chr8:72427093-72427137                            | NM_023312:-657     | Ndufa13    | PROMOTER               | 1.791                                                        | 1.527                          | 619.53             | 946.15             | 2.735                          | 577.30             | 1579.17            |
| A_68_P27536264 | chr10:126948850-126948894                         | NM_001098789:-3122 | Ndufa412   | PROMOTER               | 2.359                                                        | 3.890                          | 1188.21            | 4622.23            | 9.177                          | 968.88             | 8890.91            |
| A_68_P30382971 | chr15:82184657-82184701                           | NM_025987:43       | Ndufa6     | INSIDE                 | 1.768                                                        | 7.264                          | 5277.33            | 38335.13           | 12.840                         | 3633.10            | 46648.45           |
| A_68_P27349651 | chr10:92185236-92185280                           | NM_008682:-95      | Nedd1      | PROMOTER               | 1.968                                                        | 4.104                          | 1115.32            | 4576.96            | 8.076                          | 934.49             | 7546.94            |

| ProbeName      | Target position of probe on CpG island microarray | TargetID            | GeneSymbol | CpG island Description | Ratio of relative methylation (TiO <sub>2</sub> -NP/Vehicle) | Sham group                     |                    |                    | TiO <sub>2</sub> -H group      |                    |                    |
|----------------|---------------------------------------------------|---------------------|------------|------------------------|--------------------------------------------------------------|--------------------------------|--------------------|--------------------|--------------------------------|--------------------|--------------------|
|                |                                                   |                     |            |                        |                                                              | Relative methylation (Cy5/Cy3) | Cy3 signal (Input) | Cy5 signal (MeDIP) | Relative methylation (Cy5/Cy3) | Cy3 signal (Input) | Cy5 signal (MeDIP) |
| A_68_P3177744  | chr18:65047479-65047523                           | NM_001114386:91     | Nedd4l     | INSIDE                 | 1.843                                                        | 10.346                         | 942.70             | 9753.45            | 19.064                         | 714.87             | 13628.62           |
| A_68_P28977626 | chr13:41454570-41454617                           | NM_017464:-223      | Nedd9      | PROMOTER               | 2.118                                                        | 8.738                          | 800.33             | 6993.42            | 18.504                         | 665.69             | 12317.74           |
| A_68_P22674484 | chr3:156225009-156225062                          | NM_177274:113       | Negr1      | INSIDE                 | 1.743                                                        | 6.651                          | 2013.48            | 13392.34           | 11.594                         | 1409.31            | 16339.35           |
| A_68_P20658349 | chr1:140515986-140516030                          | NM_021605:265       | Nek7       | INSIDE                 | 1.621                                                        | 2.357                          | 1442.96            | 3401.75            | 3.822                          | 1214.75            | 4642.75            |
| A_68_P30458578 | chr15:95358757-95358801                           | NM_016743:359       | Nell2      | INSIDE                 | 1.598                                                        | 2.298                          | 4531.86            | 10413.47           | 3.672                          | 3655.64            | 13422.68           |
| A_68_P26026035 | chr8:88224110-88224154                            | NM_001081324:-9224  | Neto2      | PROMOTER               | 1.523                                                        | 1.881                          | 423.11             | 795.66             | 2.864                          | 418.85             | 1199.59            |
| A_68_P32148144 | chr19:47253081-47253125                           | NM_021360:-207      | Neur1a     | PROMOTER               | 1.772                                                        | 2.016                          | 1665.95            | 3358.83            | 3.572                          | 1310.60            | 4681.33            |
| A_68_P31110054 | chr17:26552202-26552246                           | NM_001081656:315    | Neur1b     | INSIDE                 | 1.974                                                        | 5.321                          | 1188.55            | 6323.81            | 10.504                         | 1036.44            | 10886.31           |
| A_68_P20147266 | chr1:36326391-36326435                            | NM_153408:3858      | Neur13     | INSIDE                 | 1.723                                                        | 2.008                          | 1892.51            | 3800.04            | 3.460                          | 1405.54            | 4862.79            |
| A_68_P28055686 | chr11:98188438-98188482                           | NM_010895:2499      | Neurod2    | INSIDE                 | 1.778                                                        | 5.624                          | 3157.40            | 17755.68           | 10.001                         | 1993.02            | 19932.24           |
| A_68_P22509722 | chr3:127335595-127335641                          | NM_009718:-444      | Neurog2    | PROMOTER               | 1.715                                                        | 2.334                          | 539.14             | 1258.42            | 4.004                          | 417.61             | 1672.11            |
| A_68_P27560010 | chr11:4749422-4749466                             | NM_010898:86        | Nf2        | INSIDE                 | 1.596                                                        | 2.351                          | 3344.47            | 7862.57            | 3.752                          | 2818.67            | 10576.64           |
| A_68_P31866219 | chr18:80894683-80894727                           | NM_001164111:10208  | Nfat1      | INSIDE                 | 2.561                                                        | 3.778                          | 1960.18            | 7405.43            | 9.674                          | 1497.88            | 14490.19           |
| A_68_P31866342 | chr18:80909356-80909400                           | NM_001164111:-4466  | Nfat1      | PROMOTER               | 2.130                                                        | 3.279                          | 1050.27            | 3443.57            | 6.983                          | 910.41             | 6357.55            |
| A_68_P26137548 | chr8:108583970-108584014                          | NM_010901:490       | Nfat3      | INSIDE                 | 2.022                                                        | 5.688                          | 2426.16            | 13798.89           | 11.497                         | 1782.99            | 20499.86           |
| A_68_P29620076 | chr14:56445768-56445812                           | NM_001168346:2159   | Nfat4      | INSIDE                 | 1.964                                                        | 6.334                          | 3968.26            | 25134.45           | 12.440                         | 2785.42            | 34650.17           |
| A_68_P23057175 | chr4:82151052-82151103                            | NM_001113209:135    | Nfib       | INSIDE                 | 2.186                                                        | 12.701                         | 2331.78            | 29615.98           | 27.759                         | 1593.57            | 44235.74           |
| A_68_P26021886 | chr8:87308677-87308721                            | NM_001081982:15541  | Nfix       | INSIDE                 | 2.033                                                        | 3.153                          | 2950.03            | 9300.15            | 6.408                          | 2216.58            | 14204.27           |
| A_68_P26021287 | chr8:87230962-87231012                            | NM_001081981:67282  | Nfix       | DOWNSTREAM             | 1.743                                                        | 5.485                          | 1102.57            | 6047.57            | 9.561                          | 909.77             | 8698.03            |
| A_68_P26021284 | chr8:87230641-87230685                            | NM_001081981:67606  | Nfix       | DOWNSTREAM             | 1.526                                                        | 5.117                          | 5399.70            | 27630.41           | 7.807                          | 4219.66            | 32941.71           |
| A_68_P26022004 | chr8:87323463-87323507                            | NM_001081982:755    | Nfix       | INSIDE                 | 1.591                                                        | 1.494                          | 801.96             | 1198.24            | 2.377                          | 743.63             | 1767.40            |
| A_68_P25023454 | chr7:29551526-29551579                            | NM_010908:-9        | Nfkbib     | DIVERGENT_PROMOTER     | 2.257                                                        | 8.477                          | 713.98             | 6052.27            | 19.133                         | 530.50             | 10149.87           |
| A_68_P31201770 | chr17:45692568-45692612                           | NM_008690:-74       | Nfkie      | DIVERGENT_PROMOTER     | 2.372                                                        | 9.998                          | 12623.07           | 126210.50          | 23.715                         | 8032.57            | 190492.00          |
| A_68_P26400215 | chr9:31193897-31193941                            | NM_172766:142       | Nfrikb     | INSIDE                 | 1.566                                                        | 3.163                          | 6901.85            | 21828.89           | 4.954                          | 5027.00            | 24903.77           |
| A_68_P20352133 | chr1:75121786-75121830                            | NM_029342:-8        | Nhej1      | PROMOTER               | 1.506                                                        | 3.573                          | 3084.75            | 11022.24           | 5.382                          | 2114.11            | 11378.24           |
| A_68_P22378552 | chr3:101816741-101816785                          | NM_178777:2695      | Nhlh2      | INSIDE                 | 1.993                                                        | 4.711                          | 4515.17            | 21271.37           | 9.388                          | 3478.52            | 32656.96           |
| A_68_P22378540 | chr3:101815556-101815600                          | NM_178777:1511      | Nhlh2      | INSIDE                 | 1.685                                                        | 2.047                          | 1560.93            | 3195.92            | 3.450                          | 1276.07            | 4402.83            |
| A_68_P32201471 | chr19:56623197-56623241                           | NM_025811:468       | Nhlrc2     | INSIDE                 | 1.723                                                        | 2.753                          | 677.65             | 1865.37            | 4.743                          | 532.80             | 2526.87            |
| A_68_P27794924 | chr11:51433455-51433500                           | NM_026631:203       | Nhp2       | INSIDE                 | 1.702                                                        | 3.715                          | 4250.56            | 15790.13           | 6.324                          | 3209.74            | 20297.16           |
| A_68_P32786683 | chrX:158346162-158346206                          | NM_001081052:251538 | Nhs        | INSIDE                 | 1.627                                                        | 4.032                          | 2483.51            | 10013.66           | 6.560                          | 1267.66            | 8315.23            |
| A_68_P32565869 | chrX:99044829-99044873                            | NM_001163610:127    | Nhsl2      | INSIDE                 | 1.771                                                        | 4.869                          | 967.20             | 4709.58            | 8.623                          | 694.45             | 5988.30            |
| A_68_P28518531 | chr12:71213190-71213234                           | NM_008697:-300      | Nin        | PROMOTER               | 1.503                                                        | 3.023                          | 1996.26            | 6034.16            | 4.544                          | 1812.79            | 8237.10            |
| A_68_P29023779 | chr13:49283004-49283048                           | NM_013610:111       | Ninj1      | INSIDE                 | 1.968                                                        | 4.358                          | 3369.18            | 14682.72           | 8.576                          | 2531.85            | 21712.21           |
| A_68_P25144564 | chr7:63274831-63274875                            | NM_153578:91        | Nipa1      | INSIDE                 | 1.523                                                        | 5.769                          | 4245.98            | 24493.11           | 8.786                          | 3181.43            | 27952.98           |
| A_68_P25144266 | chr9:63217700-63217744                            | NM_023647:98        | Nipa2      | INSIDE                 | 1.530                                                        | 1.692                          | 1197.66            | 2026.59            | 2.589                          | 1035.15            | 2680.06            |
| A_68_P23328804 | chr4:135050696-135050741                          | NM_028995:-299      | Nipal3     | DIVERGENT_PROMOTER     | 1.876                                                        | 2.629                          | 2957.08            | 7775.38            | 4.932                          | 2108.10            | 10397.66           |
| A_68_P30000055 | chr15:8395316-8395364                             | NM_027707:-877      | Nipl1      | PROMOTER               | 1.807                                                        | 10.334                         | 11522.38           | 119074.30          | 18.676                         | 6922.61            | 129285.00          |
| A_68_P27050627 | chr10:32609677-32609721                           | NM_001013411:23     | Nkain2     | INSIDE                 | 2.512                                                        | 7.636                          | 4966.00            | 37922.42           | 19.182                         | 3697.67            | 70929.86           |
| A_68_P28873012 | chr13:21560534-21560582                           | NM_025719:-188      | Nkap1      | PROMOTER               | 2.153                                                        | 4.725                          | 1181.67            | 5583.63            | 10.174                         | 928.73             | 9449.34            |
| A_68_P28873011 | chr13:21560407-21560451                           | NM_025719:-58       | Nkap1      | PROMOTER               | 1.702                                                        | 5.623                          | 2171.94            | 12211.78           | 9.572                          | 1787.51            | 17109.48           |
| A_68_P26041379 | chr8:91045377-91045421                            | NM_001163660:-6133  | Nkd1       | PROMOTER               | 1.941                                                        | 4.503                          | 5556.83            | 25021.48           | 8.741                          | 4103.47            | 35867.01           |
| A_68_P29142604 | chr13:73984411-73984456                           | NM_028186:646       | Nkd2       | INSIDE                 | 1.553                                                        | 2.001                          | 1418.80            | 2838.52            | 3.107                          | 1209.81            | 3759.14            |
| A_68_P28457438 | chr12:57634665-57634709                           | NM_001146198:1407   | Nkx2-1     | INSIDE                 | 1.843                                                        | 2.491                          | 2084.61            | 5193.37            | 4.591                          | 1654.48            | 7596.10            |
| A_68_P21722817 | chr2:147019650-147019694                          | NM_001077632:-7534  | Nkx2-2     | PROMOTER               | 1.813                                                        | 2.371                          | 1751.40            | 4151.79            | 4.299                          | 1341.88            | 5768.45            |
| A_68_P21722826 | chr2:147020543-147020587                          | NM_001077632:-8426  | Nkx2-2     | PROMOTER               | 1.749                                                        | 5.439                          | 1090.25            | 5929.85            | 9.512                          | 881.94             | 8388.93            |
| A_68_P21722727 | chr2:147009567-147009611                          | NR_030769:-230      | Nkx2-2as   | PROMOTER               | 1.658                                                        | 4.164                          | 378.14             | 1574.57            | 6.904                          | 306.78             | 2117.92            |
| A_68_P21722283 | chr2:146909704-146909748                          | NM_023504:1355      | Nkx2-4     | INSIDE                 | 2.154                                                        | 8.276                          | 3101.29            | 25666.94           | 17.826                         | 2213.60            | 39460.62           |

| ProbeName      | Target position of probe on CpG island microarray | TargetID          | GeneSymbol | CpG island Description | Ratio of relative methylation (TiO <sub>2</sub> -NP/Vehicle) | Sham group                     |                    |                    | TiO <sub>2</sub> -H group      |                    |                    |
|----------------|---------------------------------------------------|-------------------|------------|------------------------|--------------------------------------------------------------|--------------------------------|--------------------|--------------------|--------------------------------|--------------------|--------------------|
|                |                                                   |                   |            |                        |                                                              | Relative methylation (Cy5/Cy3) | Cy3 signal (Input) | Cy5 signal (MeDIP) | Relative methylation (Cy5/Cy3) | Cy3 signal (Input) | Cy5 signal (MeDIP) |
| A_68_P31112726 | chr17:26978463-26978507                           | NM_008700:26      | Nkx2-5     | INSIDE                 | 1.875                                                        | 3.055                          | 1100.14            | 3361.00            | 5.729                          | 941.99             | 5396.80            |
| A_68_P31112722 | chr17:26978019-26978063                           | NM_008700:470     | Nkx2-5     | INSIDE                 | 1.595                                                        | 2.654                          | 1733.03            | 4599.01            | 4.234                          | 1351.92            | 5723.70            |
| A_68_P28457808 | chr12:57713134-57713178                           | NM_008701:1115    | Nkx2-9     | INSIDE                 | 1.929                                                        | 4.516                          | 1026.23            | 4634.92            | 8.713                          | 885.78             | 7718.13            |
| A_68_P28457807 | chr12:57713035-57713080                           | NM_008701:1214    | Nkx2-9     | INSIDE                 | 1.694                                                        | 3.538                          | 580.12             | 2052.72            | 5.995                          | 556.78             | 3338.12            |
| A_68_P29694905 | chr14:69808678-69808722                           | NM_010921:-48     | Nkx3-1     | PROMOTER               | 1.542                                                        | 6.019                          | 1396.90            | 8407.55            | 9.278                          | 1099.45            | 10200.87           |
| A_68_P23936334 | chr5:102093547-102093591                          | NM_144955:162     | Nkx6-1     | INSIDE                 | 1.717                                                        | 1.920                          | 2360.88            | 4532.33            | 3.297                          | 1938.13            | 6389.91            |
| A_68_P23936340 | chr5:102094274-102094318                          | NM_144955:-566    | Nkx6-1     | PROMOTER               | 1.601                                                        | 2.012                          | 1254.18            | 2523.11            | 3.222                          | 1064.57            | 3429.80            |
| A_68_P25578901 | chr7:146768634-146768678                          | NR_027857:40      | Nkx6-2     | INSIDE                 | 1.891                                                        | 4.355                          | 4487.96            | 19544.00           | 8.234                          | 3456.28            | 28458.97           |
| A_68_P25578895 | chr7:146768050-146768094                          | NR_027857:624     | Nkx6-2     | INSIDE                 | 1.718                                                        | 3.426                          | 1968.92            | 6745.40            | 5.887                          | 1554.74            | 9153.31            |
| A_68_P25578920 | chr7:146770604-146770648                          | NR_027857:-1930   | Nkx6-2     | PROMOTER               | 1.676                                                        | 13.760                         | 1343.65            | 18488.62           | 23.064                         | 1050.68            | 24232.72           |
| A_68_P25715145 | chr8:24268305-24268349                            | NM_029002:4584    | Nkx6-3     | INSIDE                 | 1.947                                                        | 5.658                          | 1617.56            | 9152.92            | 11.019                         | 1197.01            | 13189.99           |
| A_68_P22222507 | chr3:69525834-69525878                            | NM_133787:-120    | Nmd3       | PROMOTER               | 1.648                                                        | 3.869                          | 13203.19           | 51078.09           | 6.375                          | 9180.51            | 58524.52           |
| A_68_P28029989 | chr11:93817362-93817406                           | NM_008705:-63     | Nme2       | PROMOTER               | 1.757                                                        | 4.151                          | 3025.34            | 12559.02           | 7.295                          | 2391.06            | 17443.98           |
| A_68_P20788410 | chr1:166237694-166237738                          | NM_178071:-89     | Nme7       | DIVERGENT_PROMOTER     | 1.528                                                        | 3.811                          | 729.52             | 2780.46            | 5.824                          | 566.98             | 3302.24            |
| A_68_P20723965 | chr1:154802917-154802961                          | NM_175460:708     | Nmnat2     | INSIDE                 | 1.887                                                        | 7.197                          | 5326.04            | 38330.74           | 13.580                         | 3487.41            | 47358.05           |
| A_68_P20961517 | chr2:3202117-3202161                              | NM_008708:579     | Nmt2       | INSIDE                 | 1.633                                                        | 1.432                          | 1668.58            | 2389.46            | 2.338                          | 1338.90            | 3130.71            |
| A_68_P21777851 | chr2:157386103-157386147                          | NM_010923:279     | Nnat       | INSIDE                 | 1.695                                                        | 4.656                          | 5260.47            | 24494.02           | 7.893                          | 3548.90            | 28010.42           |
| A_68_P28004910 | chr11:89163525-89163569                           | NM_008711:327     | Nog        | INSIDE                 | 1.668                                                        | 1.556                          | 2076.56            | 3230.68            | 2.595                          | 1813.25            | 4705.13            |
| A_68_P30363283 | chr15:78765483-78765527                           | NM_133800:142     | Nol12      | INSIDE                 | 1.819                                                        | 3.125                          | 1896.06            | 5924.42            | 5.685                          | 1496.31            | 8506.16            |
| A_68_P32142001 | chr19:46150433-46150477                           | NM_001039351:102  | Nolc1      | INSIDE                 | 1.564                                                        | 2.312                          | 2268.24            | 5243.62            | 3.616                          | 1941.60            | 7020.26            |
| A_68_P24818877 | chr6:125081806-125081850                          | NM_138747:-72     | Nop2       | PROMOTER               | 1.572                                                        | 2.177                          | 640.40             | 1394.03            | 3.421                          | 552.07             | 1888.75            |
| A_68_P23541414 | chr5:23889472-23889516                            | NM_008713:18858   | Nos3       | INSIDE                 | 1.560                                                        | 1.597                          | 1009.38            | 1612.02            | 2.491                          | 853.11             | 2125.19            |
| A_68_P25297066 | chr7:94395079-94395123                            | NM_015760:-204    | Nox4       | PROMOTER               | 2.021                                                        | 2.806                          | 1848.01            | 5184.78            | 5.670                          | 1421.14            | 8058.25            |
| A_68_P24981713 | chr7:17062092-17062136                            | NM_008718:15      | Npas1      | INSIDE                 | 1.628                                                        | 2.284                          | 757.96             | 1731.04            | 3.718                          | 644.47             | 2396.16            |
| A_68_P28442990 | chr12:54808173-54808232                           | NM_013780:458539  | Npas3      | INSIDE                 | 1.819                                                        | 5.224                          | 899.58             | 4699.41            | 9.504                          | 716.61             | 6810.66            |
| A_68_P28445674 | chr12:55169509-55169553                           | NM_013780:819867  | Npas3      | INSIDE                 | 1.518                                                        | 3.022                          | 1322.00            | 3995.28            | 4.587                          | 1122.49            | 5148.47            |
| A_68_P31926197 | chr19:4990111-4990155                             | NM_153553:-161    | Npas4      | PROMOTER               | 1.637                                                        | 3.428                          | 1185.76            | 4064.51            | 5.611                          | 891.16             | 5000.01            |
| A_68_P31926196 | chr19:4989991-4990035                             | NM_153553:-41     | Npas4      | PROMOTER               | 1.696                                                        | 2.125                          | 311.58             | 662.19             | 3.605                          | 264.17             | 952.35             |
| A_68_P28185591 | chr11:120470102-120470146                         | NM_153288:334     | Npb        | INSIDE                 | 1.705                                                        | 2.681                          | 3291.21            | 8822.68            | 4.571                          | 2345.49            | 10720.74           |
| A_68_P31499629 | chr18:12395086-12395130                           | NM_008720:-213    | Npc1       | PROMOTER               | 2.263                                                        | 5.827                          | 3711.66            | 21629.28           | 13.187                         | 2940.31            | 38774.14           |
| A_68_P28184543 | chr11:120298753-120298797                         | NM_001195023:240  | Nploc4     | INSIDE                 | 1.627                                                        | 2.140                          | 11825.52           | 25303.55           | 3.481                          | 8744.97            | 30442.56           |
| A_68_P22540268 | chr3:132612964-132613008                          | NM_001029836:269  | Npnt       | INSIDE                 | 1.527                                                        | 2.202                          | 1452.72            | 3198.70            | 3.362                          | 1305.20            | 4387.93            |
| A_68_P30018904 | chr15:11836154-11836198                           | NM_001039181:-747 | Npr3       | PROMOTER               | 1.692                                                        | 2.096                          | 1637.38            | 3432.46            | 3.547                          | 1416.00            | 5023.16            |
| A_68_P28178599 | chr11:119410964-119411008                         | NM_008730:-1852   | Nptx1      | PROMOTER               | 1.615                                                        | 1.911                          | 1470.34            | 2810.36            | 3.087                          | 1225.21            | 3782.05            |
| A_68_P30368655 | chr15:79634703-79634747                           | NM_030689:415     | Nptxr      | INSIDE                 | 1.767                                                        | 8.180                          | 2599.79            | 21265.87           | 14.457                         | 2031.04            | 29361.75           |
| A_68_P24434512 | chr6:49772812-49772856                            | NM_023456:107     | Npy        | INSIDE                 | 1.590                                                        | 2.141                          | 2840.99            | 6083.61            | 3.405                          | 2464.85            | 8391.72            |
| A_68_P25088136 | chr7:51808933-51808977                            | NM_009473:339     | Nr1h2      | INSIDE                 | 1.837                                                        | 5.913                          | 15841.82           | 93679.72           | 10.861                         | 11014.63           | 119635.30          |
| A_68_P25088125 | chr7:51807692-51807736                            | NM_009473:1579    | Nr1h2      | INSIDE                 | 1.772                                                        | 8.216                          | 7542.10            | 61962.49           | 14.558                         | 5015.40            | 73015.23           |
| A_68_P25088126 | chr7:51807778-51807822                            | NM_009473:1493    | Nr1h2      | INSIDE                 | 1.674                                                        | 12.326                         | 8310.29            | 102431.80          | 20.637                         | 5463.46            | 112750.90          |
| A_68_P27357767 | chr10:93610648-93610692                           | NM_011629:-5      | Nr2c1      | PROMOTER               | 1.615                                                        | 3.242                          | 3314.61            | 10746.06           | 5.237                          | 2772.73            | 14520.12           |
| A_68_P24643143 | chr6:92042164-92042208                            | NM_011630:775     | Nr2c2      | INSIDE                 | 1.591                                                        | 2.293                          | 1246.91            | 2859.03            | 3.649                          | 1034.35            | 3774.36            |
| A_68_P27095712 | chr10:42303728-42303772                           | NM_152229:-356    | Nr2e1      | PROMOTER               | 2.271                                                        | 12.858                         | 11284.84           | 145096.10          | 29.199                         | 7978.87            | 232972.60          |
| A_68_P27095676 | chr10:42299357-42299401                           | NM_152229:4016    | Nr2e1      | INSIDE                 | 1.589                                                        | 5.157                          | 3488.82            | 17991.60           | 8.195                          | 2726.60            | 22344.39           |
| A_68_P29162295 | chr13:78338732-78338776                           | NM_010151:-511    | Nr2f1      | PROMOTER               | 1.522                                                        | 2.715                          | 1410.20            | 3828.32            | 4.131                          | 1237.84            | 5113.65            |
| A_68_P31640485 | chr18:39650185-39650229                           | NM_008173:-3307   | Nr3c1      | PROMOTER               | 1.524                                                        | 2.039                          | 5516.93            | 11249.55           | 3.107                          | 4451.15            | 13830.80           |
| A_68_P21149827 | chr2:38544490-38544534                            | NM_139051:25550   | Nr5a1      | DOWNSTREAM             | 1.746                                                        | 3.993                          | 1793.33            | 7161.53            | 6.972                          | 1423.96            | 9927.68            |
| A_68_P30346013 | chr15:75920805-75920849                           | NM_144847:-383    | Nrbp2      | PROMOTER               | 1.880                                                        | 2.482                          | 2490.06            | 6180.14            | 4.665                          | 1969.62            | 9188.98            |

| ProbeName      | Target position of probe on CpG island microarray | TargetID            | GeneSymbol | CpG island Description | Ratio of relative methylation (TiO <sub>2</sub> -NP/Vehicle) | Sham group                     |                    |                    | TiO <sub>2</sub> -H group      |                    |                    |
|----------------|---------------------------------------------------|---------------------|------------|------------------------|--------------------------------------------------------------|--------------------------------|--------------------|--------------------|--------------------------------|--------------------|--------------------|
|                |                                                   |                     |            |                        |                                                              | Relative methylation (Cy5/Cy3) | Cy3 signal (Input) | Cy5 signal (MeDIP) | Relative methylation (Cy5/Cy3) | Cy3 signal (Input) | Cy5 signal (MeDIP) |
| A_68_P30346015 | chr15:75921006-75921050                           | NM_144847:-585      | Nrbp2      | PROMOTER               | 1.587                                                        | 2.955                          | 3133.29            | 9260.38            | 4.690                          | 2464.60            | 11559.95           |
| A_68_P28397452 | chr12:45429719-45429763                           | NM_001146031:-131   | Nrcam      | PROMOTER               | 1.594                                                        | 3.036                          | 974.16             | 883.91             | 4.838                          | 883.91             | 4276.75            |
| A_68_P24329792 | chr6:29998675-29998719                            | NM_001164230:709    | Nrf1       | INSIDE                 | 1.611                                                        | 1.694                          | 1282.34            | 2172.15            | 2.730                          | 1075.63            | 2936.14            |
| A_68_P31621446 | chr18:36177796-36177840                           | NM_001167891:178996 | Nrg2       | INSIDE                 | 1.912                                                        | 6.614                          | 1194.95            | 7903.79            | 12.650                         | 1049.81            | 13279.96           |
| A_68_P31621448 | chr18:36178193-36178239                           | NM_001167891:178598 | Nrg2       | INSIDE                 | 1.845                                                        | 5.845                          | 6052.49            | 35379.04           | 10.786                         | 4628.59            | 49921.89           |
| A_68_P31621445 | chr18:36177706-36177750                           | NM_001167891:179086 | Nrg2       | INSIDE                 | 1.584                                                        | 2.561                          | 186.27             | 476.99             | 4.056                          | 214.79             | 871.25             |
| A_68_P30884140 | chr16:76372608-76372652                           | NM_173440:664       | Nrip1      | INSIDE                 | 1.673                                                        | 1.856                          | 339.43             | 630.12             | 3.106                          | 264.27             | 820.80             |
| A_68_P28950705 | chr13:36816445-36816489                           | NM_153529:9857      | Nm1        | DOWNSTREAM             | 1.884                                                        | 8.358                          | 4570.60            | 38201.00           | 15.746                         | 3319.36            | 52265.63           |
| A_68_P28950790 | chr13:36827018-36827062                           | NM_153529:-717      | Nrn1       | PROMOTER               | 1.535                                                        | 1.902                          | 4299.20            | 8179.08            | 2.920                          | 3310.23            | 9664.48            |
| A_68_P20282811 | chr1:62749708-62749752                            | NM_001077406:-160   | Nrp2       | PROMOTER               | 1.920                                                        | 8.010                          | 3164.47            | 25348.92           | 15.380                         | 2494.48            | 38364.67           |
| A_68_P31258174 | chr17:56896255-56896299                           | NM_008738:677       | Nrtm       | INSIDE                 | 1.800                                                        | 9.627                          | 1392.79            | 13407.73           | 17.330                         | 1188.08            | 20589.48           |
| A_68_P31438310 | chr17:90855140-90855185                           | NM_020252:636980    | Nrxn1      | INSIDE                 | 1.637                                                        | 2.282                          | 502.53             | 1146.56            | 3.734                          | 388.45             | 1450.58            |
| A_68_P23617871 | chr5:38550739-38550783                            | NM_010942:-54       | Nsg1       | PROMOTER               | 1.696                                                        | 3.491                          | 4284.39            | 14957.57           | 5.920                          | 3403.27            | 20146.35           |
| A_68_P24116035 | chr5:135845821-135845865                          | NM_145414:20        | Nsun5      | INSIDE                 | 2.102                                                        | 17.612                         | 2746.94            | 48380.36           | 37.014                         | 1782.24            | 65968.27           |
| A_68_P32147197 | chr19:47089479-47089523                           | NM_001164363:179    | Nt5c2      | INSIDE                 | 1.557                                                        | 5.384                          | 1670.04            | 8991.04            | 8.381                          | 1366.80            | 11454.95           |
| A_68_P27315977 | chr10:86241971-86242015                           | NM_175331:243       | Nt5dc3     | INSIDE                 | 2.437                                                        | 8.680                          | 2362.38            | 20505.09           | 21.157                         | 1771.77            | 37484.74           |
| A_68_P30559120 | chr16:13819791-13819845                           | NM_010946:449       | Ntan1      | INSIDE                 | 1.743                                                        | 2.431                          | 941.21             | 2287.75            | 4.237                          | 752.84             | 3189.89            |
| A_68_P27887968 | chr11:68026330-68026374                           | NM_008744:173976    | Ntn1       | INSIDE                 | 2.061                                                        | 8.672                          | 4533.14            | 39310.19           | 17.872                         | 3242.41            | 57949.74           |
| A_68_P27354860 | chr10:93103568-93103612                           | NM_021320:-203      | Ntn4       | PROMOTER               | 1.531                                                        | 1.740                          | 1786.47            | 3107.84            | 2.664                          | 1503.59            | 4005.25            |
| A_68_P25094516 | chr7:52949587-52949631                            | NM_001033356:9825   | Ntn5       | INSIDE                 | 2.535                                                        | 6.663                          | 3395.28            | 22623.71           | 16.894                         | 2411.55            | 40740.20           |
| A_68_P22422570 | chr3:109945667-109945711                          | NM_001163348:702    | Ntng1      | INSIDE                 | 2.176                                                        | 1.821                          | 2038.86            | 3713.60            | 3.963                          | 1614.34            | 6397.87            |
| A_68_P26253528 | chr8:128258194-128258238                          | NM_025636:114       | Ntper      | INSIDE                 | 2.043                                                        | 4.405                          | 4197.86            | 18493.38           | 8.999                          | 3121.18            | 28087.87           |
| A_68_P22310062 | chr3:87599138-87599182                            | NM_001033124:-76    | Ntrk1      | DIVERGENT_PROMOTER     | 2.048                                                        | 4.535                          | 1048.11            | 4753.37            | 9.290                          | 851.34             | 7908.49            |
| A_68_P29075350 | chr13:58908196-58908240                           | NM_001025074:-975   | Ntrk2      | PROMOTER               | 2.133                                                        | 15.813                         | 9970.56            | 157660.40          | 33.725                         | 6282.78            | 211887.50          |
| A_68_P27302613 | chr10:83903670-83903714                           | NM_001004363:-476   | Nuak1      | PROMOTER               | 2.305                                                        | 2.296                          | 907.95             | 2084.57            | 5.293                          | 794.46             | 4204.96            |
| A_68_P23318161 | chr4:133101757-133101801                          | NM_010948:164       | Nude       | INSIDE                 | 1.674                                                        | 6.262                          | 3142.55            | 19678.21           | 10.484                         | 2430.84            | 25484.19           |
| A_68_P26795688 | chr9:105033875-105033919                          | NM_029385:239       | Nudt16     | INSIDE                 | 4.477                                                        | 3.082                          | 440.46             | 1357.41            | 13.798                         | 418.55             | 5775.31            |
| A_68_P25049946 | chr7:36340772-36340816                            | NM_033080:153       | Nudt19     | INSIDE                 | 1.544                                                        | 3.580                          | 1871.68            | 6700.77            | 5.526                          | 1707.74            | 9437.16            |
| A_68_P31117527 | chr17:27760515-27760559                           | NM_019837:-139      | Nudt3      | PROMOTER               | 1.743                                                        | 1.917                          | 633.10             | 1213.82            | 3.342                          | 554.31             | 1852.33            |
| A_68_P27938848 | chr11:77500486-77500530                           | NM_001024205:868    | Nufip2     | INSIDE                 | 1.602                                                        | 2.017                          | 1984.94            | 4004.32            | 3.232                          | 1657.94            | 5359.11            |
| A_68_P27483044 | chr10:117229909-117229953                         | NM_134010:-169      | Nup107     | PROMOTER               | 1.724                                                        | 2.587                          | 4878.89            | 12620.43           | 4.460                          | 3749.15            | 16720.20           |
| A_68_P26242535 | chr8:126473140-126473184                          | NM_172288:3         | Nup133     | INSIDE                 | 1.970                                                        | 3.959                          | 1555.56            | 6157.81            | 7.800                          | 1160.78            | 9054.05            |
| A_68_P21418382 | chr2:90519554-90519598                            | NM_021512:2205      | Nup160     | INSIDE                 | 1.994                                                        | 5.312                          | 8159.69            | 43345.81           | 10.590                         | 6258.95            | 66281.53           |
| A_68_P21418380 | chr2:90519239-90519283                            | NM_021512:1889      | Nup160     | INSIDE                 | 1.823                                                        | 5.490                          | 7728.86            | 42429.44           | 10.009                         | 6169.66            | 61751.11           |
| A_68_P24636902 | chr6:91066754-91066798                            | NM_018815:44        | Nup210     | INSIDE                 | 1.561                                                        | 4.842                          | 904.94             | 4381.50            | 7.557                          | 808.28             | 6107.96            |
| A_68_P27931783 | chr11:76212254-76212298                           | NM_008750:367       | Nxn        | INSIDE                 | 1.686                                                        | 2.497                          | 957.35             | 2390.08            | 4.210                          | 767.91             | 3232.83            |
| A_68_P29031120 | chr13:51266739-51266783                           | NM_029173:367       | Nxn12      | INSIDE                 | 1.600                                                        | 3.920                          | 2615.10            | 10251.94           | 6.274                          | 2115.39            | 13272.40           |
| A_68_P28039255 | chr11:95375266-95375310                           | NM_130858:591       | Nxph3      | INSIDE                 | 1.891                                                        | 6.571                          | 8238.62            | 54137.48           | 12.429                         | 6016.37            | 74779.02           |
| A_68_P28039252 | chr11:95374960-95375004                           | NM_130858:897       | Nxph3      | INSIDE                 | 1.713                                                        | 3.388                          | 3144.62            | 10653.15           | 5.802                          | 2466.83            | 14312.08           |
| A_68_P27835010 | chr11:58947926-58947970                           | NM_001171512:1929   | Obscn      | INSIDE                 | 1.685                                                        | 5.288                          | 2672.68            | 14132.77           | 8.908                          | 1825.71            | 16262.78           |
| A_68_P29269012 | chr13:101322550-101322594                         | NM_008756:-119      | Ocln       | PROMOTER               | 1.564                                                        | 2.208                          | 944.00             | 2084.61            | 3.455                          | 1005.10            | 3472.29            |
| A_68_P22606649 | chr3:144781741-144781785                          | NM_025714:199       | Odf21      | INSIDE                 | 1.963                                                        | 4.343                          | 4977.82            | 21616.42           | 8.526                          | 3841.15            | 32748.48           |
| A_68_P25846165 | chr8:49314031-49314075                            | NM_001145937:445992 | Odz3       | INSIDE                 | 1.660                                                        | 2.794                          | 320.07             | 894.25             | 4.638                          | 302.78             | 1404.39            |
| A_68_P25846166 | chr8:49314139-49314183                            | NM_001145937:445884 | Odz3       | INSIDE                 | 1.536                                                        | 1.963                          | 353.88             | 694.53             | 3.014                          | 297.77             | 897.56             |
| A_68_P25343512 | chr7:103359060-103359104                          | NM_011858:-64       | Odz4       | PROMOTER               | 2.117                                                        | 11.052                         | 2664.60            | 29448.01           | 23.391                         | 2126.61            | 49742.89           |
| A_68_P24758832 | chr6:113276968-113277012                          | NM_010957:21        | Ogg1       | INSIDE                 | 1.739                                                        | 4.601                          | 10666.25           | 49076.78           | 8.002                          | 7706.41            | 61667.74           |
| A_68_P21089590 | chr2:28048879-28048923                            | NM_001038614:288    | Olfm1      | INSIDE                 | 1.610                                                        | 1.554                          | 1325.05            | 2058.76            | 2.502                          | 1162.53            | 2908.28            |

| ProbeName      | Target position of probe on CpG island microarray | TargetID            | GeneSymbol | CpG island Description | Ratio of relative methylation (TiO <sub>2</sub> -NP/Vehicle) | Sham group                     |                    |                    | TiO <sub>2</sub> -H group      |                    |                    |
|----------------|---------------------------------------------------|---------------------|------------|------------------------|--------------------------------------------------------------|--------------------------------|--------------------|--------------------|--------------------------------|--------------------|--------------------|
|                |                                                   |                     |            |                        |                                                              | Relative methylation (Cy5/Cy3) | Cy3 signal (Input) | Cy5 signal (MeDIP) | Relative methylation (Cy5/Cy3) | Cy3 signal (Input) | Cy5 signal (MeDIP) |
| A_68_P31167789 | chr17:37334385-37334429                           | NM_001011518:505    | Olfir94    | INSIDE                 | 3.185                                                        | 0.553                          | 612.40             | 338.39             | 1.760                          | 485.62             | 854.62             |
| A_68_P30961954 | chr16:91271188-91271232                           | NM_016968:1197      | Olig1      | INSIDE                 | 1.526                                                        | 1.925                          | 2176.75            | 4190.72            | 2.937                          | 1710.79            | 5024.60            |
| A_68_P30961697 | chr16:91226847-91226891                           | NM_016967:1074      | Olig2      | INSIDE                 | 1.750                                                        | 3.045                          | 5236.27            | 15942.01           | 5.329                          | 4041.84            | 21540.29           |
| A_68_P31774692 | chr18:64500898-64500942                           | NM_194268:903       | Onecut2    | INSIDE                 | 1.782                                                        | 3.177                          | 1989.72            | 6321.43            | 5.662                          | 1432.33            | 8109.73            |
| A_68_P20849641 | chr1:177622831-177622875                          | NM_010098:-131      | Opn3       | DIVERGENT_PROMOTER     | 2.280                                                        | 1.833                          | 6986.01            | 12806.43           | 4.180                          | 5290.64            | 22112.28           |
| A_68_P24053482 | chr5:123464905-123464949                          | NM_175423:-156      | Orai1      | PROMOTER               | 1.816                                                        | 2.677                          | 906.36             | 2426.00            | 4.861                          | 846.86             | 4116.84            |
| A_68_P24119778 | chr5:136646540-136646584                          | NM_178751:-36       | Orai2      | PROMOTER               | 1.570                                                        | 2.888                          | 626.29             | 1808.83            | 4.534                          | 612.18             | 2775.79            |
| A_68_P20259227 | chr1:58561519-58561563                            | NM_001025378:-3280  | Orc2       | PROMOTER               | 1.530                                                        | 2.177                          | 586.53             | 1276.70            | 3.330                          | 452.39             | 1506.25            |
| A_68_P27280126 | chr10:79440000-79440044                           | NM_001003949:7053   | ORF61      | INSIDE                 | 1.672                                                        | 6.151                          | 2393.85            | 14723.85           | 10.284                         | 1638.63            | 16851.02           |
| A_68_P27280132 | chr10:79440564-79440611                           | NM_001003949:6488   | ORF61      | INSIDE                 | 1.613                                                        | 3.420                          | 396.18             | 1354.95            | 5.517                          | 305.43             | 1685.10            |
| A_68_P27280131 | chr10:79440436-79440480                           | NM_001003949:6617   | ORF61      | INSIDE                 | 1.535                                                        | 3.448                          | 2109.25            | 7272.62            | 5.293                          | 1727.17            | 9141.30            |
| A_68_P20231213 | chr1:53353942-53353986                            | NM_145517:26        | Ormdl1     | INSIDE                 | 3.543                                                        | 1.826                          | 419.01             | 764.99             | 6.468                          | 388.28             | 2511.27            |
| A_68_P22752864 | chr4:15941113-15941157                            | NM_145950:-110      | Osgin2     | PROMOTER               | 2.094                                                        | 4.203                          | 1844.34            | 7752.34            | 8.800                          | 1498.32            | 13185.35           |
| A_68_P27096130 | chr10:42398668-42398712                           | NM_172416:-31       | Ostm1      | PROMOTER               | 2.043                                                        | 8.153                          | 7419.15            | 60484.62           | 16.654                         | 5007.72            | 83396.75           |
| A_68_P23618578 | chr5:38668746-38668790                            | NM_172709:126       | Otop1      | INSIDE                 | 1.845                                                        | 3.000                          | 1919.11            | 5756.51            | 5.536                          | 1513.31            | 8377.17            |
| A_68_P29237600 | chr13:95653897-95653941                           | NM_011021:8337      | Otp        | DOWNSTREAM             | 2.471                                                        | 2.116                          | 4449.75            | 9414.95            | 5.227                          | 3177.96            | 16612.19           |
| A_68_P29237599 | chr13:95653816-95653860                           | NM_011021:8257      | Otp        | DOWNSTREAM             | 2.133                                                        | 2.276                          | 7639.08            | 17383.48           | 4.854                          | 5327.65            | 25861.44           |
| A_68_P29237544 | chr13:95647510-95647554                           | NM_011021:1951      | Otp        | INSIDE                 | 1.900                                                        | 3.442                          | 1352.07            | 4653.63            | 6.541                          | 951.11             | 6220.87            |
| A_68_P28697278 | chr12:104627062-104627106                         | NM_001177841:193    | Otub2      | INSIDE                 | 1.615                                                        | 2.049                          | 1442.32            | 2955.86            | 3.310                          | 1280.20            | 4237.09            |
| A_68_P22347470 | chr3:95908249-95908293                            | NM_001025613:-179   | Otud7b     | PROMOTER               | 1.539                                                        | 1.937                          | 515.73             | 999.13             | 2.982                          | 384.89             | 1147.91            |
| A_68_P27924667 | chr11:74992384-74992428                           | NM_027136:-96       | Ovca2      | PROMOTER               | 1.889                                                        | 6.221                          | 3563.75            | 22170.42           | 11.753                         | 2485.00            | 29206.57           |
| A_68_P22180925 | chr3:60806609-60806653                            | NM_008772:-816      | P2ry1      | PROMOTER               | 1.542                                                        | 1.612                          | 1581.70            | 2549.48            | 2.485                          | 1392.53            | 3460.49            |
| A_68_P27168078 | chr10:58786437-58786481                           | NM_011030:415       | P4ha1      | INSIDE                 | 1.840                                                        | 4.803                          | 4662.90            | 22393.81           | 8.836                          | 3461.32            | 30584.71           |
| A_68_P27168073 | chr10:58785999-58786043                           | NM_011030:-23       | P4ha1      | PROMOTER               | 1.509                                                        | 2.524                          | 683.06             | 1724.28            | 3.809                          | 537.46             | 2046.99            |
| A_68_P30139527 | chr15:36538715-36538759                           | NM_008774:-8        | Pabpc1     | PROMOTER               | 1.515                                                        | 1.917                          | 3127.60            | 5996.12            | 2.904                          | 2496.02            | 7248.76            |
| A_68_P30139530 | chr15:36539045-36539089                           | NM_008774:-338      | Pabpc1     | PROMOTER               | 1.795                                                        | 1.615                          | 1468.37            | 2370.92            | 2.898                          | 1265.04            | 3665.54            |
| A_68_P32625282 | chrX:117040767-117040811                          | NM_053114:-16       | Pabpc5     | PROMOTER               | 1.669                                                        | 4.541                          | 2248.43            | 10209.47           | 7.577                          | 1645.15            | 12464.63           |
| A_68_P29614877 | chr14:55513260-55513304                           | NM_019402:303       | Pabpn1     | INSIDE                 | 2.182                                                        | 9.221                          | 2638.58            | 24330.46           | 20.124                         | 1966.61            | 39576.81           |
| A_68_P31117838 | chr17:27822326-27822370                           | NM_178365:150       | Pacsin1    | INSIDE                 | 1.768                                                        | 3.552                          | 4612.42            | 16382.12           | 6.279                          | 3523.84            | 22124.95           |
| A_68_P31117689 | chr17:27792526-27792570                           | NM_011861:-78       | Pacsin1    | PROMOTER               | 1.615                                                        | 3.070                          | 940.96             | 2889.02            | 4.959                          | 739.85             | 3668.92            |
| A_68_P31117688 | chr17:27792442-27792486                           | NM_011861:-162      | Pacsin1    | PROMOTER               | 1.610                                                        | 3.962                          | 687.38             | 2723.32            | 6.378                          | 565.99             | 3609.76            |
| A_68_P21421545 | chr2:91095901-91095945                            | NM_030880:-1047     | Pacsin3    | PROMOTER               | 1.632                                                        | 4.268                          | 1205.71            | 5146.03            | 6.967                          | 981.70             | 6839.83            |
| A_68_P25009543 | chr7:26082789-26082833                            | NM_008776:164       | Pafah1b3   | INSIDE                 | 1.626                                                        | 3.401                          | 2594.91            | 8824.50            | 5.529                          | 2029.01            | 11218.18           |
| A_68_P30650846 | chr16:32079318-32079362                           | NM_177326:19        | Pak2       | INSIDE                 | 1.975                                                        | 8.408                          | 4276.72            | 35957.81           | 16.607                         | 3448.53            | 57270.10           |
| A_68_P30650841 | chr16:32078788-32078844                           | NM_177326:543       | Pak2       | INSIDE                 | 1.572                                                        | 5.599                          | 463.67             | 2596.20            | 8.801                          | 294.26             | 2589.67            |
| A_68_P25022784 | chr7:29383198-29383242                            | NM_027470:-17       | Pak4       | PROMOTER               | 1.853                                                        | 2.382                          | 1554.18            | 3702.31            | 4.414                          | 1320.10            | 5827.10            |
| A_68_P21565317 | chr2:118489132-118489176                          | NM_001033254:-158   | Pak6       | PROMOTER               | 1.614                                                        | 1.728                          | 1297.75            | 2242.70            | 2.790                          | 1069.14            | 2982.74            |
| A_68_P25911981 | chr8:64238686-64238730                            | NM_001081390:142779 | Palld      | INSIDE                 | 1.978                                                        | 2.275                          | 971.13             | 2209.05            | 4.500                          | 779.80             | 3508.97            |
| A_68_P25910880 | chr8:64070053-64070097                            | NM_001081390:311413 | Palld      | INSIDE                 | 1.803                                                        | 5.859                          | 3203.60            | 18770.66           | 10.564                         | 2389.29            | 25240.59           |
| A_68_P26017663 | chr8:86545319-86545363                            | NM_028877:-32       | Palm3      | DIVERGENT_PROMOTER     | 1.837                                                        | 4.553                          | 2619.26            | 11926.44           | 8.366                          | 2019.89            | 16899.13           |
| A_68_P24173631 | chr5:148241874-148241918                          | NM_028291:-259      | Pan3       | PROMOTER               | 1.613                                                        | 2.699                          | 3211.48            | 8667.31            | 4.355                          | 2514.20            | 10948.12           |
| A_68_P23435277 | chr4:154338248-154338292                          | NM_172990:29        | Pank4      | INSIDE                 | 1.780                                                        | 5.935                          | 6193.36            | 36759.48           | 10.566                         | 4696.39            | 49623.53           |
| A_68_P29228002 | chr13:93962021-93962065                           | NM_133905:196       | Papd4      | INSIDE                 | 1.520                                                        | 4.177                          | 1394.45            | 5824.97            | 6.349                          | 1073.14            | 6813.49            |
| A_68_P26039507 | chr8:90723531-90723575                            | NM_001164497:441    | Papd5      | INSIDE                 | 1.748                                                        | 5.336                          | 3155.94            | 16841.30           | 9.330                          | 2634.39            | 24579.68           |
| A_68_P27648126 | chr11:23795318-23795362                           | NM_172555:-70       | Papog1     | PROMOTER               | 1.923                                                        | 3.254                          | 5338.37            | 17370.64           | 6.258                          | 3939.80            | 24656.64           |
| A_68_P21839351 | chr2:167906222-167906266                          | NM_021409:-259      | Pard6b     | PROMOTER               | 1.565                                                        | 6.818                          | 1258.10            | 8577.99            | 10.671                         | 1114.90            | 11897.11           |
| A_68_P26554375 | chr9:59465216-59465260                            | NM_001205239:148    | Parp6      | INSIDE                 | 1.878                                                        | 4.980                          | 2916.91            | 14526.13           | 9.350                          | 2137.24            | 19983.87           |

| ProbeName      | Target position of probe on CpG Island microarray | TargetID           | GeneSymbol | CpG island Description | Ratio of relative methylation (TiO <sub>2</sub> -NP/Vehicle) | Sham group                     |                    |                    | TiO <sub>2</sub> -H group      |                    |                    |
|----------------|---------------------------------------------------|--------------------|------------|------------------------|--------------------------------------------------------------|--------------------------------|--------------------|--------------------|--------------------------------|--------------------|--------------------|
|                |                                                   |                    |            |                        |                                                              | Relative methylation (Cy5/Cy3) | Cy3 signal (Input) | Cy5 signal (MeDIP) | Relative methylation (Cy5/Cy3) | Cy3 signal (Input) | Cy5 signal (MeDIP) |
| A_68_P26554373 | chr9:59464987-59465031                            | NM_001205239:-82   | Parp6      | PROMOTER               | 1.842                                                        | 4.992                          | 752.76             | 3758.08            | 9.197                          | 605.13             | 5565.22            |
| A_68_P29360867 | chr13:117813151-117813195                         | NM_001081009:1151  | Parp8      | INSIDE                 | 1.624                                                        | 2.720                          | 1787.53            | 4862.28            | 4.418                          | 1510.48            | 6672.61            |
| A_68_P27551118 | chr11:3189560-3189605                             | NM_019574:-877     | Patz1      | PROMOTER               | 1.586                                                        | 2.121                          | 4010.21            | 8505.49            | 3.364                          | 3196.90            | 10755.63           |
| A_68_P32134209 | chr19:44830746-44830790                           | NM_011037:-1115    | Pax2       | PROMOTER               | 1.621                                                        | 2.469                          | 5256.54            | 12977.15           | 4.002                          | 3853.20            | 15420.81           |
| A_68_P22878646 | chr4:44717054-44717098                            | NM_008782:6236     | Pax5       | INSIDE                 | 1.867                                                        | 3.219                          | 1464.92            | 4715.36            | 6.011                          | 1183.08            | 7111.31            |
| A_68_P27265105 | chr10:76424885-76424929                           | NM_021568:-214     | Pcbp3      | PROMOTER               | 2.101                                                        | 15.355                         | 9942.78            | 152671.90          | 32.260                         | 6191.69            | 199742.50          |
| A_68_P26772513 | chr9:100935215-100935259                          | NM_025835:58       | Pccb       | INSIDE                 | 2.286                                                        | 4.099                          | 7042.17            | 28866.25           | 9.370                          | 5402.54            | 50619.91           |
| A_68_P31632704 | chr18:38371400-38371444                           | NM_029357:-2006    | Pcdh1      | PROMOTER               | 1.730                                                        | 3.324                          | 1831.38            | 6088.28            | 5.751                          | 1438.68            | 8273.75            |
| A_68_P31632702 | chr18:38371220-38371264                           | NM_029357:-1826    | Pcdh1      | PROMOTER               | 1.614                                                        | 1.637                          | 1732.59            | 2835.79            | 2.642                          | 1331.45            | 3518.04            |
| A_68_P22101775 | chr3:45185176-45185220                            | NM_011043:2879     | Pcdh10     | INSIDE                 | 2.086                                                        | 3.350                          | 1178.34            | 3947.95            | 6.990                          | 865.17             | 6047.41            |
| A_68_P29773624 | chr14:84843322-84843371                           | NM_001013753:-23   | Pcdh17     | PROMOTER               | 1.670                                                        | 2.058                          | 854.99             | 1759.49            | 3.436                          | 615.33             | 2114.28            |
| A_68_P24591289 | chr6:83027770-83027814                            | NM_197992:-591     | Pcgfl      | DIVERGENT_PROMOTER     | 2.204                                                        | 2.692                          | 354.10             | 953.35             | 5.934                          | 302.72             | 1796.48            |
| A_68_P23972071 | chr5:108890061-108890105                          | NM_172716:-268     | Pcgf3      | PROMOTER               | 1.559                                                        | 1.706                          | 2087.61            | 3562.17            | 2.661                          | 1779.09            | 4734.15            |
| A_68_P23972073 | chr5:108890220-108890264                          | NM_172716:-108     | Pcgf3      | PROMOTER               | 1.535                                                        | 1.619                          | 1040.16            | 1683.50            | 2.484                          | 873.42             | 2169.90            |
| A_68_P21820253 | chr2:164705104-164705148                          | NM_146129:259      | Pcif1      | INSIDE                 | 1.506                                                        | 2.676                          | 1462.77            | 3914.74            | 4.030                          | 1325.28            | 5340.69            |
| A_68_P25809870 | chr8:42325280-42325324                            | NM_023662:190      | Pcm1       | INSIDE                 | 2.286                                                        | 10.549                         | 531.79             | 5609.94            | 24.115                         | 415.82             | 10027.66           |
| A_68_P28583196 | chr12:82961089-82961133                           | NM_018814:94       | Pcnx       | INSIDE                 | 1.529                                                        | 2.203                          | 1583.96            | 3489.16            | 3.368                          | 1330.25            | 4480.48            |
| A_68_P31759277 | chr18:61867112-61867156                           | NM_172832:155      | Pcyox11    | INSIDE                 | 1.517                                                        | 2.206                          | 3676.05            | 8109.10            | 3.347                          | 2825.32            | 9456.43            |
| A_68_P24164494 | chr5:145900797-145900843                          | NM_001033313:138   | Pdap1      | INSIDE                 | 1.765                                                        | 2.842                          | 4990.32            | 14183.28           | 5.016                          | 3663.46            | 18375.68           |
| A_68_P22246600 | chr3:75360381-75360425                            | NM_019745:319      | Pdcd10     | INSIDE                 | 1.539                                                        | 2.256                          | 8011.46            | 18072.48           | 3.472                          | 5244.25            | 18209.34           |
| A_68_P25435757 | chr7:121559995-121560039                          | NM_011055:1249     | Pde3b      | INSIDE                 | 1.762                                                        | 3.398                          | 1535.25            | 5217.14            | 5.987                          | 1224.88            | 7333.25            |
| A_68_P26345770 | chr9:20970026-20970070                            | NM_183408:-109     | Pde4a      | PROMOTER               | 1.604                                                        | 5.969                          | 970.27             | 5791.23            | 9.573                          | 837.83             | 8020.49            |
| A_68_P22484168 | chr3:122432681-122432725                          | NM_153422:627      | Pde5a      | INSIDE                 | 1.670                                                        | 4.891                          | 2019.15            | 9875.76            | 8.168                          | 1558.90            | 12732.31           |
| A_68_P26142832 | chr8:109571961-109572005                          | NM_026513:532      | Pdf        | INSIDE                 | 1.539                                                        | 2.131                          | 1545.36            | 3293.12            | 3.279                          | 1239.71            | 4064.46            |
| A_68_P24132971 | chr5:139470887-139470931                          | NM_008808:-1       | Pdgfa      | PROMOTER               | 1.916                                                        | 6.049                          | 10464.92           | 63300.49           | 11.592                         | 10109.40           | 117188.10          |
| A_68_P24132963 | chr5:139469932-139469976                          | NM_008808:953      | Pdgfa      | INSIDE                 | 1.639                                                        | 2.663                          | 4001.13            | 10655.82           | 4.365                          | 3144.04            | 13724.14           |
| A_68_P26282992 | chr9:6168448-6168492                              | NM_027924:-141     | Pdgfd      | PROMOTER               | 1.570                                                        | 2.157                          | 1141.79            | 2463.16            | 3.387                          | 924.44             | 3131.10            |
| A_68_P23807625 | chr5:75548984-75549028                            | NM_001083316:-3184 | Pdgfra     | PROMOTER               | 1.952                                                        | 3.211                          | 2425.96            | 7790.23            | 6.267                          | 1751.08            | 10974.80           |
| A_68_P32778409 | chrX:156576281-156576325                          | NM_008810:-34      | Pdha1      | PROMOTER               | 3.016                                                        | 7.865                          | 716.04             | 5631.76            | 23.720                         | 359.32             | 8523.27            |
| A_68_P23322032 | chr4:133843514-133843558                          | NM_001163794:-368  | Pdik11     | PROMOTER               | 2.276                                                        | 2.424                          | 1209.39            | 2931.15            | 5.516                          | 959.27             | 5291.41            |
| A_68_P21322072 | chr2:71711713-71711757                            | NM_172665:406      | Pdk1       | INSIDE                 | 1.711                                                        | 2.500                          | 555.31             | 1388.44            | 4.279                          | 440.50             | 1884.90            |
| A_68_P32536210 | chrX:91077357-91077401                            | NM_145630:56       | Pdk3       | INSIDE                 | 1.538                                                        | 3.659                          | 1319.92            | 4829.75            | 5.629                          | 988.31             | 5563.58            |
| A_68_P31095624 | chr17:24278101-24278145                           | NM_001080773:434   | Pdpk1      | INSIDE                 | 1.546                                                        | 2.407                          | 3121.36            | 7513.71            | 3.722                          | 2605.17            | 9697.66            |
| A_68_P32464980 | chrX:71069698-71069742                            | NM_001029868:588   | Pdzd4      | INSIDE                 | 2.253                                                        | 5.144                          | 453.64             | 2333.58            | 11.591                         | 243.90             | 2826.91            |
| A_68_P32464984 | chrX:71070091-71070135                            | NM_001029868:196   | Pdzd4      | INSIDE                 | 1.811                                                        | 4.937                          | 765.24             | 3778.22            | 8.939                          | 576.34             | 5152.02            |
| A_68_P24697529 | chr6:101327967-101328012                          | NM_018884:-98      | Pdzrn3     | PROMOTER               | 2.116                                                        | 3.642                          | 1129.20            | 4112.31            | 7.704                          | 922.39             | 7106.53            |
| A_68_P24956659 | chr7:6682310-6682354                              | NM_008817:798      | Peg3       | INSIDE                 | 1.748                                                        | 1.520                          | 829.29             | 1260.71            | 2.657                          | 758.86             | 2016.08            |
| A_68_P22696144 | chr4:4066014-4066058                              | NM_001002927:-444  | Penk       | PROMOTER               | 2.009                                                        | 5.062                          | 1845.48            | 9341.22            | 10.168                         | 1526.33            | 15519.67           |
| A_68_P25046332 | chr7:35697322-35697366                            | NM_008820:-81      | Pepd       | PROMOTER               | 1.775                                                        | 4.026                          | 3483.89            | 14027.35           | 7.147                          | 2496.64            | 17842.52           |
| A_68_P26977750 | chr10:18565037-18565081                           | NM_022032:182      | Perp       | INSIDE                 | 1.631                                                        | 6.079                          | 2807.39            | 17066.31           | 9.913                          | 2265.96            | 22463.50           |
| A_68_P23398659 | chr4:148473653-148473697                          | NM_019781:247      | Pex14      | INSIDE                 | 1.601                                                        | 3.023                          | 1074.05            | 3246.82            | 4.840                          | 773.96             | 3745.89            |
| A_68_P28803336 | chr13:6648044-6648088                             | NM_019703:-96      | Pfkip      | PROMOTER               | 1.680                                                        | 2.512                          | 1278.91            | 3213.24            | 4.221                          | 960.08             | 4052.59            |
| A_68_P27901897 | chr11:70468130-70468174                           | NM_011072:0        | Pfin1      | INSIDE                 | 2.001                                                        | 12.585                         | 2812.51            | 35396.18           | 25.178                         | 2091.82            | 52667.40           |
| A_68_P32117861 | chr19:41986212-41986256                           | NM_023418:-126     | Pgam1      | PROMOTER               | 1.664                                                        | 2.604                          | 2189.77            | 5702.93            | 4.335                          | 1832.91            | 7945.02            |
| A_68_P20237360 | chr1:54614625-54614669                            | NM_001163314:-120  | Pgap1      | PROMOTER               | 1.573                                                        | 1.663                          | 1951.68            | 3246.19            | 2.616                          | 1243.26            | 3252.49            |
| A_68_P23749120 | chr5:64484497-64484543                            | NM_025700:332      | Pgm1       | INSIDE                 | 1.632                                                        | 4.520                          | 2595.29            | 11730.50           | 7.376                          | 2168.53            | 15994.06           |
| A_68_P23146552 | chr4:99602526-99602570                            | NM_028132:493      | Pgm2       | INSIDE                 | 2.610                                                        | 5.642                          | 12527.75           | 70679.57           | 14.726                         | 8253.81            | 121548.50          |



| ProbeName      | Target position of probe on CpG island microarray | TargetID           | GeneSymbol | CpG island Description | Ratio of relative methylation (TiO <sub>2</sub> -NP/Vehicle) | Sham group                     |                    |                    | TiO <sub>2</sub> -H group      |                    |                    |
|----------------|---------------------------------------------------|--------------------|------------|------------------------|--------------------------------------------------------------|--------------------------------|--------------------|--------------------|--------------------------------|--------------------|--------------------|
|                |                                                   |                    |            |                        |                                                              | Relative methylation (Cy5/Cy3) | Cy3 signal (Input) | Cy5 signal (MeDIP) | Relative methylation (Cy5/Cy3) | Cy3 signal (Input) | Cy5 signal (MeDIP) |
| A_68_P31097493 | chr17:24606963-24607007                           | NM_025954:-433     | Pgp        | PROMOTER               | 1.951                                                        | 7.982                          | 4367.45            | 34859.26           | 15.570                         | 2531.42            | 39413.34           |
| A_68_P25953242 | chr8:73183309-73183353                            | NM_023217:250      | Pgpep1     | INSIDE                 | 1.959                                                        | 1.778                          | 3492.00            | 6208.53            | 3.483                          | 2420.79            | 8431.85            |
| A_68_P22083003 | chr3:40886734-40886778                            | NM_027558:212      | Pgrmc2     | INSIDE                 | 1.583                                                        | 4.991                          | 30520.14           | 152321.60          | 7.899                          | 21096.52           | 166634.90          |
| A_68_P26951412 | chr10:13194053-13194097                           | NM_001195065:128   | Phactr2    | INSIDE                 | 1.753                                                        | 1.737                          | 792.22             | 1376.34            | 3.045                          | 676.01             | 2058.35            |
| A_68_P21888635 | chr2:177853739-177853783                          | NM_001177789:81    | Phactr3    | INSIDE                 | 2.868                                                        | 25.028                         | 2515.99            | 62971.06           | 71.771                         | 1619.79            | 116252.80          |
| A_68_P21888793 | chr2:177877242-177877286                          | NM_028806:627      | Phactr3    | INSIDE                 | 2.033                                                        | 15.233                         | 3107.48            | 47336.47           | 30.969                         | 1919.41            | 59441.49           |
| A_68_P23415887 | chr4:151369933-151369977                          | NM_172705:334      | Phf13      | INSIDE                 | 1.522                                                        | 2.338                          | 8895.10            | 20795.78           | 3.559                          | 7091.16            | 25238.78           |
| A_68_P27796195 | chr11:51671777-51671821                           | NM_199299:-815     | Phf15      | PROMOTER               | 1.927                                                        | 3.621                          | 11034.72           | 39960.52           | 6.977                          | 7949.07            | 55458.77           |
| A_68_P22085568 | chr3:41368782-41368826                            | NM_001130186:3     | Phf17      | INSIDE                 | 2.300                                                        | 18.229                         | 4332.09            | 78968.20           | 41.924                         | 2483.05            | 104099.50          |
| A_68_P22085575 | chr3:41369640-41369684                            | NM_001130186:861   | Phf17      | INSIDE                 | 1.805                                                        | 7.734                          | 1394.73            | 10786.45           | 13.960                         | 1101.00            | 15370.41           |
| A_68_P21130445 | chr2:34769374-34769418                            | NM_028716:100      | Phf19      | INSIDE                 | 1.696                                                        | 2.328                          | 393.02             | 914.86             | 3.947                          | 279.14             | 1101.68            |
| A_68_P21130446 | chr2:34769487-34769531                            | NM_028716:-12      | Phf19      | PROMOTER               | 1.571                                                        | 5.149                          | 4230.44            | 21782.11           | 8.088                          | 3388.78            | 27408.76           |
| A_68_P30292506 | chr15:66409382-66409426                           | NM_001081409:271   | Phf2011    | INSIDE                 | 1.693                                                        | 2.130                          | 765.44             | 1630.54            | 3.606                          | 674.77             | 2432.95            |
| A_68_P30292508 | chr15:66409642-66409686                           | NM_001081409:531   | Phf2011    | INSIDE                 | 1.574                                                        | 2.490                          | 1736.18            | 4323.53            | 3.921                          | 1286.61            | 5044.53            |
| A_68_P30397291 | chr15:84684245-84684289                           | NM_001081166:2293  | Phf21b     | INSIDE                 | 1.710                                                        | 4.195                          | 3058.48            | 12831.61           | 7.173                          | 2343.68            | 16811.35           |
| A_68_P27898391 | chr11:69810124-69810168                           | NM_030064:874      | Phf23      | INSIDE                 | 1.900                                                        | 6.188                          | 16696.39           | 103321.70          | 11.758                         | 11612.96           | 136541.00          |
| A_68_P27898381 | chr11:69809079-69809123                           | NM_030064:-172     | Phf23      | PROMOTER               | 1.704                                                        | 1.792                          | 4096.91            | 7341.58            | 3.054                          | 2920.50            | 8919.54            |
| A_68_P27898394 | chr11:69810400-69810444                           | NM_030064:1150     | Phf23      | INSIDE                 | 1.520                                                        | 2.800                          | 6398.65            | 17918.06           | 4.255                          | 4222.08            | 17965.36           |
| A_68_P27449326 | chr10:110943860-110943904                         | NM_009344:541      | Phlda1     | INSIDE                 | 1.699                                                        | 4.686                          | 709.78             | 3326.28            | 7.963                          | 558.04             | 4443.61            |
| A_68_P26469100 | chr9:44516622-44516666                            | NM_153537:26633    | Phldb1     | INSIDE                 | 2.502                                                        | 21.012                         | 5164.24            | 108511.90          | 52.574                         | 2894.18            | 152159.80          |
| A_68_P25005776 | chr7:25396309-25396353                            | NM_001102613:-16   | Phldb3     | PROMOTER               | 1.980                                                        | 6.753                          | 6453.48            | 43581.39           | 13.373                         | 4202.48            | 56201.35           |
| A_68_P20506810 | chr1:108069429-108069473                          | NM_133821:1005     | Phlpp1     | INSIDE                 | 1.941                                                        | 3.369                          | 2493.42            | 8399.51            | 6.540                          | 2097.84            | 13719.55           |
| A_68_P20506808 | chr1:108069211-108069255                          | NM_133821:787      | Phlpp1     | INSIDE                 | 1.898                                                        | 7.316                          | 1813.92            | 13270.07           | 13.888                         | 1509.26            | 20961.24           |
| A_68_P26159425 | chr8:112392612-112392656                          | NM_001122594:132   | Phlpp2     | INSIDE                 | 1.759                                                        | 3.602                          | 1589.73            | 5276.16            | 6.337                          | 1426.80            | 9041.23            |
| A_68_P25375583 | chr7:108967177-108967221                          | NM_008887:372      | Phox2a     | INSIDE                 | 1.720                                                        | 5.525                          | 3288.44            | 18167.43           | 9.503                          | 2745.79            | 26092.66           |
| A_68_P25375611 | chr7:108970306-108970350                          | NM_008887:3502     | Phox2a     | INSIDE                 | 1.680                                                        | 2.025                          | 711.87             | 1441.29            | 3.402                          | 593.26             | 2018.49            |
| A_68_P21073067 | chr2:25430182-25430226                            | NM_029293:187      | Phpt1      | INSIDE                 | 1.554                                                        | 4.301                          | 8690.48            | 37378.51           | 6.683                          | 6210.23            | 41501.24           |
| A_68_P25587734 | chr7:148445714-148445758                          | NM_001081118:31050 | Phrf1      | INSIDE                 | 1.558                                                        | 7.229                          | 1689.14            | 12210.11           | 11.262                         | 1175.85            | 13242.93           |
| A_68_P23523151 | chr5:20387300-20387344                            | NM_172992:620      | Phft2      | INSIDE                 | 1.700                                                        | 2.310                          | 1113.80            | 2573.14            | 3.927                          | 1022.76            | 4015.91            |
| A_68_P27230702 | chr10:70061703-70061747                           | NM_001162846:-6164 | Phyhip1    | PROMOTER               | 2.042                                                        | 3.479                          | 2120.64            | 7376.67            | 7.102                          | 1778.00            | 12627.91           |
| A_68_P23696525 | chr5:53132855-53132899                            | NM_025951:64       | Pi4k2b     | INSIDE                 | 1.695                                                        | 5.578                          | 1428.36            | 7967.54            | 9.456                          | 1312.72            | 12413.29           |
| A_68_P26573393 | chr9:62827843-62827887                            | NM_019663:822      | Pias1      | INSIDE                 | 1.586                                                        | 1.682                          | 3374.87            | 5675.32            | 2.667                          | 2383.82            | 6356.72            |
| A_68_P27287865 | chr10:80630602-80630646                           | NM_021501:-159     | Pias4      | DIVERGENT_PROMOTER     | 1.735                                                        | 3.750                          | 3317.59            | 12442.19           | 6.506                          | 2416.58            | 15721.63           |
| A_68_P27287763 | chr10:80617060-80617104                           | NM_021501:13383    | Pias4      | INSIDE                 | 1.503                                                        | 3.958                          | 1158.08            | 4583.60            | 5.950                          | 877.19             | 5219.09            |
| A_68_P32798239 | chrX:160857687-160857731                          | NM_011081:-10      | Piga       | PROMOTER               | 1.846                                                        | 2.501                          | 1866.07            | 4667.41            | 4.618                          | 951.22             | 4392.61            |
| A_68_P31420721 | chr17:87424605-87424649                           | NM_008838:115      | Pigf       | INSIDE                 | 1.660                                                        | 2.008                          | 871.61             | 1750.16            | 3.333                          | 783.45             | 2610.98            |
| A_68_P31420718 | chr17:87424300-87424344                           | NM_008838:419      | Pigf       | INSIDE                 | 1.560                                                        | 1.566                          | 712.72             | 1116.06            | 2.444                          | 619.81             | 1514.57            |
| A_68_P30980968 | chr16:94592282-94592326                           | NM_001159618:-147  | Pigp       | PROMOTER               | 1.525                                                        | 3.774                          | 2425.87            | 9154.33            | 5.756                          | 2179.99            | 12547.77           |
| A_68_P27942685 | chr11:78141893-78141937                           | NM_201406:-9       | Pigs       | PROMOTER               | 1.662                                                        | 1.612                          | 736.88             | 1187.49            | 2.678                          | 654.41             | 1752.51            |
| A_68_P27980117 | chr11:84693941-84693985                           | NM_001077636:-175  | Pigw       | PROMOTER               | 3.046                                                        | 8.934                          | 7846.91            | 70105.60           | 27.217                         | 4810.06            | 130915.60          |
| A_68_P27980115 | chr11:84693687-84693731                           | NM_027388:-11      | Pigw       | DIVERGENT_PROMOTER     | 1.852                                                        | 5.805                          | 4740.80            | 27519.45           | 10.748                         | 3448.08            | 37060.13           |
| A_68_P25091451 | chr7:52409634-52409678                            | NM_029406:-111     | Pih1d1     | PROMOTER               | 1.644                                                        | 2.322                          | 1695.68            | 3936.97            | 3.817                          | 1344.88            | 5133.11            |
| A_68_P26762516 | chr9:99040770-99040814                            | NM_029094:-162     | Pik3cb     | PROMOTER               | 1.641                                                        | 2.485                          | 1822.34            | 4528.06            | 4.078                          | 1394.74            | 5688.22            |
| A_68_P27551374 | chr11:3232269-3232313                             | NM_178149:1557     | Pik3ip1    | INSIDE                 | 1.706                                                        | 2.224                          | 832.12             | 1850.51            | 3.793                          | 649.12             | 2462.26            |
| A_68_P25953980 | chr8:73300616-73300660                            | NM_008841:-27      | Pik3r2     | DIVERGENT_PROMOTER     | 1.747                                                        | 3.516                          | 669.06             | 2352.54            | 6.141                          | 614.17             | 3771.75            |
| A_68_P30421719 | chr15:88693018-88693062                           | NM_145478:417      | Pim3       | INSIDE                 | 1.883                                                        | 4.203                          | 734.95             | 3088.77            | 7.913                          | 589.31             | 4663.15            |
| A_68_P29664074 | chr14:64479020-64479064                           | NM_028228:-106     | Pinx1      | PROMOTER               | 1.575                                                        | 3.862                          | 3348.45            | 12932.88           | 6.085                          | 2482.57            | 15106.29           |

| ProbeName      | Target position of probe on CpG island microarray | TargetID           | GeneSymbol | CpG island Description | Ratio of relative methylation (TiO <sub>2</sub> -NP/Vehicle) | Sham group                     |                    |                    | TiO <sub>2</sub> -H group      |                    |                    |
|----------------|---------------------------------------------------|--------------------|------------|------------------------|--------------------------------------------------------------|--------------------------------|--------------------|--------------------|--------------------------------|--------------------|--------------------|
|                |                                                   |                    |            |                        |                                                              | Relative methylation (Cy5/Cy3) | Cy3 signal (Input) | Cy5 signal (MeDIP) | Relative methylation (Cy5/Cy3) | Cy3 signal (Input) | Cy5 signal (MeDIP) |
| A_68_P27534649 | chr10:126648747-126648791                         | NM_054097:-90      | Pip4k2c    | PROMOTER               | 1.574                                                        | 2.122                          | 1956.33            | 4150.66            | 3.340                          | 1693.26            | 5656.06            |
| A_68_P27288650 | chr10:80755715-80755759                           | NM_001146687:20    | Pip5k1c    | INSIDE                 | 1.506                                                        | 2.439                          | 1510.25            | 3683.36            | 3.672                          | 1267.97            | 4656.54            |
| A_68_P31003040 | chr17:3084893-3084937                             | NR_003519:-731     | Pisd-ps2   | PROMOTER               | 2.471                                                        | 9.924                          | 20698.53           | 205421.40          | 24.520                         | 13630.62           | 334218.10          |
| A_68_P23985069 | chr5:111760075-111760119                          | NM_019640:314      | Pitpnb     | INSIDE                 | 2.044                                                        | 3.246                          | 1597.28            | 5185.40            | 6.636                          | 1287.60            | 8543.96            |
| A_68_P28107262 | chr11:107332069-107332113                         | NM_145823:-56      | Pitpnc1    | DIVERGENT_PROMOTER     | 1.915                                                        | 11.985                         | 2125.28            | 25472.22           | 22.948                         | 1793.44            | 41155.20           |
| A_68_P28107247 | chr11:107330576-107330620                         | NM_145823:1436     | Pitpnc1    | INSIDE                 | 1.562                                                        | 1.920                          | 1761.15            | 3381.05            | 2.998                          | 1368.08            | 4102.19            |
| A_68_P31921054 | chr19:4101079-4101123                             | NM_008851:479      | Pitpnm1    | INSIDE                 | 1.942                                                        | 3.118                          | 795.68             | 2480.76            | 6.056                          | 677.00             | 4099.75            |
| A_68_P29057251 | chr13:55927242-55927286                           | NM_011097:522      | Pitx1      | INSIDE                 | 1.591                                                        | 2.076                          | 628.89             | 1305.28            | 3.303                          | 520.93             | 1720.60            |
| A_68_P22518659 | chr3:128907292-128907336                          | NM_001042502:-9540 | Pitx2      | PROMOTER               | 1.645                                                        | 3.010                          | 1668.95            | 5023.52            | 4.951                          | 1335.15            | 6610.53            |
| A_68_P32555655 | chrX:96666023-96666067                            | NM_001083110:30    | Pja1       | INSIDE                 | 2.025                                                        | 2.458                          | 1745.67            | 4290.00            | 4.976                          | 972.49             | 4838.95            |
| A_68_P31295069 | chr17:64681315-64681359                           | NM_001025309:-113  | Pja2       | PROMOTER               | 1.735                                                        | 2.178                          | 911.66             | 1985.96            | 3.779                          | 794.14             | 3001.14            |
| A_68_P31098019 | chr17:24687487-24687532                           | NM_013630:615      | Pkd1       | INSIDE                 | 1.785                                                        | 5.306                          | 1287.64            | 6831.75            | 9.469                          | 1086.78            | 10290.64           |
| A_68_P26016101 | chr8:86222687-86222731                            | NM_001199593:-4748 | Pkn1       | PROMOTER               | 1.511                                                        | 2.520                          | 992.70             | 2501.25            | 3.806                          | 882.85             | 3360.44            |
| A_68_P26429021 | chr9:36954305-36954349                            | NM_001029838:525   | Pknox2     | INSIDE                 | 1.746                                                        | 3.693                          | 1007.30            | 3720.30            | 6.447                          | 818.84             | 5279.12            |
| A_68_P20642551 | chr1:137815771-137815815                          | NM_019645:-191     | Pkp1       | PROMOTER               | 1.649                                                        | 2.439                          | 2311.39            | 5636.91            | 4.021                          | 1869.14            | 7515.51            |
| A_68_P30568393 | chr16:16213292-16213336                           | NM_026163:-123     | Pkp2       | PROMOTER               | 1.596                                                        | 2.621                          | 1302.42            | 3413.60            | 4.184                          | 1066.08            | 4460.33            |
| A_68_P30568394 | chr16:16213390-16213434                           | NM_026163:-25      | Pkp2       | PROMOTER               | 1.581                                                        | 1.469                          | 1701.74            | 2499.70            | 2.322                          | 1438.16            | 3338.92            |
| A_68_P21250388 | chr2:58999667-58999711                            | NM_026361:782      | Pkp4       | INSIDE                 | 2.153                                                        | 7.303                          | 2391.43            | 17465.64           | 15.726                         | 1956.02            | 30760.24           |
| A_68_P21250385 | chr2:58999390-58999434                            | NM_026361:506      | Pkp4       | INSIDE                 | 1.780                                                        | 4.497                          | 4161.06            | 18710.84           | 8.005                          | 2857.20            | 22872.33           |
| A_68_P26949005 | chr10:12810608-12810652                           | NM_009538:37       | Plagl1     | INSIDE                 | 1.519                                                        | 8.094                          | 996.87             | 8068.42            | 12.295                         | 851.53             | 10469.14           |
| A_68_P21753788 | chr2:153067075-153067119                          | NM_018807:-2       | Plagl2     | DIVERGENT_PROMOTER     | 2.034                                                        | 5.406                          | 1530.17            | 8272.83            | 10.998                         | 1242.41            | 13664.06           |
| A_68_P24039106 | chr5:120953388-120953432                          | NM_023625:222      | Plb2       | INSIDE                 | 1.674                                                        | 3.995                          | 959.96             | 3834.81            | 6.686                          | 724.31             | 4842.55            |
| A_68_P26203094 | chr8:120022462-120022506                          | NM_172285:294      | Plcg2      | INSIDE                 | 1.558                                                        | 2.890                          | 674.71             | 1949.84            | 4.503                          | 610.32             | 2748.25            |
| A_68_P30729955 | chr16:46010463-46010507                           | NM_001134480:42    | Plcx2      | INSIDE                 | 1.845                                                        | 4.883                          | 876.34             | 4279.17            | 9.008                          | 681.15             | 6135.69            |
| A_68_P21587817 | chr2:122564114-122564158                          | NM_019788:-104     | Pldn       | PROMOTER               | 1.618                                                        | 4.136                          | 1376.79            | 5694.31            | 6.692                          | 1095.09            | 7328.83            |
| A_68_P30346762 | chr15:76028710-76028754                           | NM_201393:-93      | Plec       | PROMOTER               | 1.879                                                        | 3.238                          | 2210.87            | 7157.92            | 6.082                          | 1649.76            | 10033.85           |
| A_68_P30346633 | chr15:76014154-76014198                           | NM_201394:11964    | Plec       | INSIDE                 | 1.758                                                        | 3.607                          | 1900.53            | 6855.42            | 6.341                          | 1385.38            | 8784.31            |
| A_68_P30346599 | chr15:76009927-76009971                           | NM_201394:16192    | Plec       | INSIDE                 | 1.658                                                        | 4.838                          | 1926.06            | 9318.28            | 8.023                          | 1489.19            | 11947.43           |
| A_68_P30346619 | chr15:76012289-76012333                           | NM_201394:13830    | Plec       | INSIDE                 | 1.658                                                        | 5.461                          | 1257.05            | 6864.84            | 9.055                          | 1034.03            | 9363.44            |
| A_68_P30346592 | chr15:76009110-76009154                           | NM_201394:17008    | Plec       | INSIDE                 | 1.592                                                        | 3.611                          | 372.29             | 1344.43            | 5.748                          | 317.36             | 1824.20            |
| A_68_P30346615 | chr15:76011854-76011898                           | NM_201394:14264    | Plec       | INSIDE                 | 1.570                                                        | 4.794                          | 1004.83            | 4816.70            | 7.527                          | 812.41             | 6114.67            |
| A_68_P30346613 | chr15:76011583-76011627                           | NM_201394:14536    | Plec       | INSIDE                 | 1.805                                                        | 1.900                          | 565.89             | 1075.26            | 3.429                          | 411.97             | 1412.72            |
| A_68_P28566637 | chr12:80012969-80013013                           | NM_013738:-5065    | Plek2      | PROMOTER               | 1.738                                                        | 2.300                          | 3127.95            | 7195.06            | 3.997                          | 2381.41            | 9519.02            |
| A_68_P28566640 | chr12:80013209-80013253                           | NM_013738:-5305    | Plek2      | PROMOTER               | 1.503                                                        | 1.504                          | 2873.07            | 4322.23            | 2.261                          | 2125.31            | 4805.89            |
| A_68_P25524908 | chr7:138009867-138009911                          | NM_133942:465      | Plekha1    | INSIDE                 | 1.557                                                        | 2.360                          | 671.79             | 1585.13            | 3.673                          | 567.60             | 2084.95            |
| A_68_P25524905 | chr7:138009499-138009543                          | NM_133942:97       | Plekha1    | INSIDE                 | 1.523                                                        | 3.165                          | 4756.44            | 15053.68           | 4.820                          | 3968.99            | 19129.86           |
| A_68_P24894485 | chr6:140373203-140373247                          | NM_144920:605      | Plekha5    | INSIDE                 | 1.756                                                        | 1.787                          | 4206.33            | 7516.88            | 3.138                          | 3331.26            | 10452.47           |
| A_68_P26133404 | chr8:107898928-107898972                          | NM_001081333:-330  | Plekha4    | PROMOTER               | 1.572                                                        | 3.196                          | 1633.40            | 5220.99            | 5.026                          | 1335.87            | 6714.39            |
| A_68_P27285555 | chr10:80260794-80260838                           | NM_023900:555      | Plekhl1    | INSIDE                 | 2.029                                                        | 5.818                          | 14811.46           | 86178.09           | 11.803                         | 10962.46           | 129386.30          |
| A_68_P26588443 | chr9:65427955-65427999                            | NM_153119:-135     | Plekho2    | DIVERGENT_PROMOTER     | 2.017                                                        | 3.347                          | 4537.00            | 15184.92           | 6.750                          | 3697.39            | 24956.61           |
| A_68_P26725648 | chr9:92145271-92145315                            | NM_011636:261      | Plscr1     | INSIDE                 | 1.735                                                        | 3.586                          | 4101.69            | 14709.23           | 6.221                          | 3012.57            | 18741.24           |
| A_68_P28053756 | chr11:97847867-97847911                           | NM_001163608:-128  | Plxdc1     | PROMOTER               | 1.972                                                        | 4.486                          | 1026.12            | 4602.73            | 8.846                          | 764.65             | 6763.79            |
| A_68_P26818267 | chr9:108998137-108998181                          | NM_172775:209      | Plxnb1     | INSIDE                 | 1.833                                                        | 3.745                          | 978.86             | 3665.46            | 6.864                          | 845.62             | 5804.39            |
| A_68_P30423567 | chr15:88991606-88991650                           | NM_001159521:12652 | Plxnb2     | INSIDE                 | 1.556                                                        | 5.958                          | 10055.88           | 59914.80           | 9.268                          | 6667.91            | 61798.74           |
| A_68_P27362366 | chr10:94407709-94407753                           | NM_018797:-518     | Plxnc1     | PROMOTER               | 1.676                                                        | 12.375                         | 270.07             | 3342.19            | 20.744                         | 254.69             | 5283.15            |
| A_68_P24774306 | chr6:115943883-115943927                          | NM_026376:1119     | Plxnd1     | INSIDE                 | 1.988                                                        | 5.492                          | 1597.59            | 8773.58            | 10.917                         | 1045.67            | 11415.58           |
| A_68_P24774311 | chr6:115944633-115944678                          | NM_026376:368      | Plxnd1     | INSIDE                 | 1.882                                                        | 6.530                          | 3149.31            | 20564.84           | 12.291                         | 2421.41            | 29761.64           |

| ProbeName      | Target position of probe on CpG island microarray | TargetID         | GeneSymbol | CpG island Description | Ratio of relative methylation (TiO <sub>2</sub> -NP/Vehicle) | Sham group                     |                    |                    | TiO <sub>2</sub> -H group      |                    |                    |
|----------------|---------------------------------------------------|------------------|------------|------------------------|--------------------------------------------------------------|--------------------------------|--------------------|--------------------|--------------------------------|--------------------|--------------------|
|                |                                                   |                  |            |                        |                                                              | Relative methylation (Cy5/Cy3) | Cy3 signal (Input) | Cy5 signal (MeDIP) | Relative methylation (Cy5/Cy3) | Cy3 signal (Input) | Cy5 signal (MeDIP) |
| A_68_P22313622 | chr3:88214207-88214256                            | NM_025928:7      | Pmf1       | INSIDE                 | 1.734                                                        | 3.408                          | 876.38             | 2986.69            | 5.908                          | 678.82             | 4010.58            |
| A_68_P23527584 | chr5:21243055-21243099                            | NM_028431:99     | Pmpeb      | INSIDE                 | 1.544                                                        | 3.765                          | 910.72             | 3429.27            | 5.814                          | 810.88             | 4714.20            |
| A_68_P28470083 | chr12:60168415-60168459                           | NM_008891:531    | Pnn        | INSIDE                 | 2.123                                                        | 1.820                          | 544.02             | 990.33             | 3.864                          | 511.63             | 1976.88            |
| A_68_P27614819 | chr11:17111398-17111442                           | NM_025443:172    | Pno1       | INSIDE                 | 1.749                                                        | 2.061                          | 1394.34            | 2873.63            | 3.605                          | 1113.56            | 4013.90            |
| A_68_P24338521 | chr6:31513401-31513445                            | NM_013723:515    | Podxl      | INSIDE                 | 2.261                                                        | 5.210                          | 1194.73            | 6224.80            | 11.778                         | 960.89             | 11317.24           |
| A_68_P20800091 | chr1:168339580-168339624                          | NM_001142948:357 | Pogk       | INSIDE                 | 1.795                                                        | 4.313                          | 8825.38            | 38061.16           | 7.740                          | 6802.34            | 52653.14           |
| A_68_P22340919 | chr3:94642155-94642199                            | NM_001165948:688 | Pogz       | INSIDE                 | 1.790                                                        | 7.624                          | 1520.61            | 11592.56           | 13.646                         | 1173.41            | 16012.30           |
| A_68_P25088095 | chr7:51804301-51804346                            | NM_011131:-138   | Pold1      | PROMOTER               | 1.691                                                        | 2.746                          | 3343.13            | 9180.62            | 4.645                          | 2543.73            | 11815.50           |
| A_68_P30678526 | chr16:37011868-37011912                           | NM_001159369:19  | Polq       | INSIDE                 | 1.889                                                        | 2.244                          | 1247.87            | 2800.29            | 4.240                          | 1016.30            | 4308.64            |
| A_68_P21623003 | chr2:128926712-128926756                          | NM_009086:3      | Polr1b     | INSIDE                 | 1.563                                                        | 1.939                          | 2491.03            | 4831.30            | 3.031                          | 1831.52            | 5550.56            |
| A_68_P21623006 | chr2:128926947-128926991                          | NM_009086:237    | Polr1b     | INSIDE                 | 1.629                                                        | 1.389                          | 1216.53            | 1689.37            | 2.262                          | 1077.43            | 2436.99            |
| A_68_P27896916 | chr11:69572824-69572871                           | NM_009089:-1122  | Polr2a     | PROMOTER               | 1.517                                                        | 1.649                          | 653.89             | 1078.34            | 2.502                          | 517.68             | 1295.20            |
| A_68_P26079854 | chr8:97381360-97381404                            | NM_009090:33     | Polr2c     | INSIDE                 | 1.708                                                        | 8.059                          | 1623.42            | 13082.40           | 13.768                         | 1177.99            | 16217.94           |
| A_68_P30589177 | chr16:20718065-20718109                           | NM_145632:188    | Polr2h     | INSIDE                 | 1.695                                                        | 2.321                          | 1698.55            | 3942.10            | 3.934                          | 1393.67            | 5482.07            |
| A_68_P28875600 | chr13:22073387-22073431                           | NM_001162929:346 | Pom1212    | INSIDE                 | 1.679                                                        | 2.064                          | 2503.61            | 5166.48            | 3.465                          | 2055.02            | 7119.94            |
| A_68_P24117361 | chr5:136164752-136164796                          | NM_008898:-309   | Por        | PROMOTER               | 1.609                                                        | 5.202                          | 3240.90            | 16858.04           | 8.370                          | 2280.86            | 19090.59           |
| A_68_P20797864 | chr1:167933679-167933723                          | NM_011137:-935   | Pou2fl     | PROMOTER               | 1.732                                                        | 4.747                          | 1600.53            | 7598.07            | 8.223                          | 1240.42            | 10199.96           |
| A_68_P23269516 | chr4:124335391-124335435                          | NM_011141:524    | Pou3fl     | INSIDE                 | 1.647                                                        | 4.999                          | 1869.29            | 9344.93            | 8.232                          | 1390.95            | 11450.48           |
| A_68_P20184680 | chr1:42755426-42755470                            | NM_008900:1458   | Pou3f3     | INSIDE                 | 2.714                                                        | 6.638                          | 5306.77            | 35227.30           | 18.016                         | 3602.30            | 64898.50           |
| A_68_P20184678 | chr1:42755116-42755160                            | NM_008900:1148   | Pou3f3     | INSIDE                 | 1.507                                                        | 3.857                          | 1035.60            | 3994.36            | 5.813                          | 842.84             | 4899.23            |
| A_68_P29871680 | chr14:104872642-104872686                         | NM_011143:-5448  | Pou4fl     | PROMOTER               | 2.411                                                        | 11.000                         | 6367.29            | 70042.71           | 26.520                         | 4744.22            | 125818.80          |
| A_68_P30486488 | chr15:100408907-100408951                         | NM_010127:7868   | Pou6fl     | INSIDE                 | 1.685                                                        | 3.988                          | 537.02             | 2141.41            | 6.718                          | 406.10             | 2728.33            |
| A_68_P24770499 | chr6:115312049-115312093                          | NM_001127330:832 | Pparg      | INSIDE                 | 1.561                                                        | 1.939                          | 1450.39            | 2812.26            | 3.026                          | 1089.63            | 3297.74            |
| A_68_P31757526 | chr18:61558105-61558149                           | NM_133249:1959   | Ppargc1b   | INSIDE                 | 1.563                                                        | 2.958                          | 4297.15            | 12709.21           | 4.622                          | 3216.73            | 14868.65           |
| A_68_P21909031 | chr2:180921876-180921920                          | NM_025598:-149   | Ppdpf      | PROMOTER               | 1.639                                                        | 1.741                          | 1516.43            | 2640.73            | 2.853                          | 1252.05            | 3572.49            |
| A_68_P25092565 | chr7:52602361-52602407                            | NM_029741:20005  | Ppfa3      | INSIDE                 | 2.064                                                        | 16.737                         | 4118.57            | 68931.68           | 34.541                         | 2615.55            | 90342.51           |
| A_68_P25092685 | chr7:52622314-52622358                            | NM_029741:53     | Ppfa3      | INSIDE                 | 1.790                                                        | 3.630                          | 1450.59            | 5264.91            | 6.498                          | 1233.06            | 8011.86            |
| A_68_P27568398 | chr11:6316069-6316113                             | NM_008907:218    | Ppia       | INSIDE                 | 1.776                                                        | 4.454                          | 3774.27            | 16809.61           | 7.911                          | 3015.41            | 23855.94           |
| A_68_P27568397 | chr11:6315971-6316015                             | NM_008907:120    | Ppia       | INSIDE                 | 1.632                                                        | 3.616                          | 2360.54            | 8534.66            | 5.899                          | 1898.06            | 11197.31           |
| A_68_P26590952 | chr9:65908094-65908138                            | NM_011149:141    | Ppib       | INSIDE                 | 1.871                                                        | 4.387                          | 1835.70            | 8054.00            | 8.209                          | 1472.92            | 12091.40           |
| A_68_P31126969 | chr17:29401134-29401178                           | NM_026845:-240   | Ppil1      | DIVERGENT_PROMOTER     | 2.682                                                        | 11.142                         | 1321.08            | 14720.04           | 29.885                         | 882.61             | 26376.44           |
| A_68_P31126967 | chr17:29400949-29400993                           | NM_026845:-54    | Ppil1      | DIVERGENT_PROMOTER     | 1.577                                                        | 1.945                          | 970.15             | 1886.55            | 3.066                          | 846.71             | 2596.06            |
| A_68_P28533645 | chr12:73862367-73862411                           | NM_008910:191    | Ppm1a      | INSIDE                 | 1.968                                                        | 4.045                          | 3217.29            | 13015.10           | 7.962                          | 2569.35            | 20457.82           |
| A_68_P27993897 | chr11:87172172-87172216                           | NM_177167:302    | Ppm1e      | INSIDE                 | 1.611                                                        | 3.684                          | 1483.62            | 5465.32            | 5.934                          | 1280.66            | 7599.66            |
| A_68_P23577160 | chr5:31522948-31522992                            | NM_008014:-52    | Ppm1g      | PROMOTER               | 1.593                                                        | 5.580                          | 2910.39            | 16240.42           | 8.892                          | 2461.09            | 21883.42           |
| A_68_P22393109 | chr3:104584285-104584329                          | NM_027982:333    | Ppm1j      | INSIDE                 | 1.726                                                        | 8.053                          | 2584.88            | 20816.80           | 13.897                         | 2145.43            | 29815.76           |
| A_68_P23584119 | chr5:32761375-32761419                            | NM_172707:54     | Ppp1cb     | INSIDE                 | 1.713                                                        | 3.796                          | 5314.37            | 20175.38           | 6.503                          | 4182.75            | 27199.38           |
| A_68_P26918726 | chr10:6979506-6979550                             | NM_133485:863    | Ppp1r14c   | INSIDE                 | 1.631                                                        | 3.344                          | 2479.69            | 8292.48            | 5.454                          | 1974.99            | 10772.07           |
| A_68_P30349855 | chr15:76502255-76502299                           | NM_033371:167    | Ppp1r16a   | INSIDE                 | 2.037                                                        | 5.148                          | 4503.69            | 23185.47           | 10.486                         | 3132.18            | 32843.45           |
| A_68_P21784239 | chr2:158492898-158492942                          | NM_001159662:50  | Ppp1r16b   | INSIDE                 | 1.681                                                        | 3.141                          | 534.12             | 1677.59            | 5.279                          | 476.36             | 2514.85            |
| A_68_P30646578 | chr16:31275334-31275378                           | NM_025800:7      | Ppp1r2     | INSIDE                 | 1.929                                                        | 3.705                          | 2474.18            | 9166.92            | 7.148                          | 2077.06            | 14846.63           |
| A_68_P21890601 | chr2:178148869-178148913                          | NM_001085501:287 | Ppp1r3d    | INSIDE                 | 2.424                                                        | 10.660                         | 2909.91            | 31019.30           | 25.839                         | 1951.87            | 50435.31           |
| A_68_P23314345 | chr4:132399162-132399206                          | NM_146154:-100   | Ppp1r8     | PROMOTER               | 1.626                                                        | 4.182                          | 1875.06            | 7842.09            | 6.801                          | 1488.10            | 10121.29           |
| A_68_P28035927 | chr11:94853399-94853443                           | NM_172261:895    | Ppp1r9b    | INSIDE                 | 1.509                                                        | 4.641                          | 494.07             | 2292.84            | 7.001                          | 468.52             | 3280.20            |
| A_68_P31084402 | chr17:21082837-21082881                           | NM_016891:441    | Ppp2r1a    | INSIDE                 | 1.513                                                        | 1.991                          | 424.01             | 844.09             | 3.012                          | 391.52             | 1179.10            |
| A_68_P29682917 | chr14:67690619-67690663                           | NM_001205188:668 | Ppp2r2a    | INSIDE                 | 1.791                                                        | 7.070                          | 3368.81            | 23816.75           | 12.659                         | 2318.52            | 29350.15           |
| A_68_P23610086 | chr5:37259995-37260039                            | NM_172994:208    | Ppp2r2c    | INSIDE                 | 1.617                                                        | 5.030                          | 2473.74            | 12442.91           | 8.135                          | 1955.76            | 15909.70           |

| ProbeName      | Target position of probe on CpG island microarray | TargetID            | GeneSymbol | CpG island Description | Ratio of relative methylation (TiO <sub>2</sub> -NP/Vehicle) | Sham group                     |                    |                    | TiO <sub>2</sub> -H group      |                    |                    |
|----------------|---------------------------------------------------|---------------------|------------|------------------------|--------------------------------------------------------------|--------------------------------|--------------------|--------------------|--------------------------------|--------------------|--------------------|
|                |                                                   |                     |            |                        |                                                              | Relative methylation (Cy5/Cy3) | Cy3 signal (Input) | Cy5 signal (MeDIP) | Relative methylation (Cy5/Cy3) | Cy3 signal (Input) | Cy5 signal (MeDIP) |
| A_68_P26773477 | chr9:101153798-101153842                          | NM_001161362:342    | Ppp2r3a    | INSIDE                 | 1.730                                                        | 1.698                          | 791.47             | 1343.88            | 2.937                          | 672.35             | 1974.64            |
| A_68_P31933357 | chr19:6235648-6235692                             | NM_198168:170       | Ppp2r5b    | INSIDE                 | 1.796                                                        | 1.849                          | 688.63             | 1273.17            | 3.320                          | 592.64             | 1967.48            |
| A_68_P28738217 | chr12:111684829-111684873                         | NM_001135001:-538   | Ppp2r5c    | PROMOTER               | 1.531                                                        | 2.468                          | 2455.41            | 6061.07            | 3.780                          | 1822.54            | 6888.58            |
| A_68_P28549425 | chr12:76697618-76697662                           | NM_012024:-453      | Ppp2r5e    | PROMOTER               | 1.582                                                        | 2.537                          | 3045.09            | 7725.01            | 4.013                          | 2503.22            | 10046.44           |
| A_68_P29700471 | chr14:70689220-70689264                           | NM_008915:14        | Ppp3cc     | INSIDE                 | 1.547                                                        | 2.361                          | 288.34             | 680.82             | 3.653                          | 268.34             | 980.17             |
| A_68_P29700473 | chr14:70689417-70689461                           | NM_008915:-182      | Ppp3cc     | PROMOTER               | 1.847                                                        | 1.470                          | 711.29             | 1045.58            | 2.714                          | 616.46             | 1673.29            |
| A_68_P27614514 | chr11:17059211-17059255                           | NM_024459:-68       | Ppp3r1     | PROMOTER               | 1.544                                                        | 2.576                          | 1662.81            | 4284.09            | 3.979                          | 1513.69            | 6022.63            |
| A_68_P21871010 | chr2:173484993-173485037                          | NR_027957:26        | Ppp4r11-ps | INSIDE                 | 1.723                                                        | 4.435                          | 2241.73            | 9941.73            | 7.641                          | 1850.19            | 14137.33           |
| A_68_P31918148 | chr19:3575782-3575826                             | NM_001164159:-55    | Ppp6r3     | PROMOTER               | 1.673                                                        | 1.972                          | 7854.17            | 15489.25           | 3.299                          | 5282.36            | 17424.43           |
| A_68_P32239859 | chrX:7305710-7305754                              | NM_138602:36        | Pra12      | INSIDE                 | 1.949                                                        | 1.561                          | 944.87             | 1475.33            | 3.044                          | 603.67             | 1837.49            |
| A_68_P25265832 | chr7:87439097-87439141                            | NM_145150:-232      | Prc1       | PROMOTER               | 1.748                                                        | 5.867                          | 2742.61            | 16091.81           | 10.254                         | 2081.05            | 21339.65           |
| A_68_P21431995 | chr2:92855411-92855455                            | NM_001177536:30869  | Prdm11     | INSIDE                 | 1.621                                                        | 1.810                          | 1126.49            | 2039.31            | 2.935                          | 947.95             | 2782.42            |
| A_68_P21110386 | chr2:31495757-31495801                            | NM_001123362:222    | Prdm12     | INSIDE                 | 1.676                                                        | 3.384                          | 3165.24            | 10710.31           | 5.671                          | 2441.02            | 13843.20           |
| A_68_P23433055 | chr4:154011802-154011846                          | NM_001177995:-842   | Prdm16     | PROMOTER               | 1.599                                                        | 6.269                          | 1955.43            | 12259.20           | 10.026                         | 1598.27            | 16024.05           |
| A_68_P23430798 | chr4:153715842-153715886                          | NM_001177995:295118 | Prdm16     | INSIDE                 | 1.535                                                        | 6.877                          | 4530.81            | 31157.62           | 10.557                         | 3110.63            | 32839.81           |
| A_68_P23373724 | chr4:142752116-142752160                          | NM_001081355:50474  | Prdm2      | INSIDE                 | 1.844                                                        | 3.720                          | 941.81             | 3503.25            | 6.859                          | 847.18             | 5811.11            |
| A_68_P27311096 | chr10:85379833-85379877                           | NM_181650:-164      | Prdm4      | PROMOTER               | 1.730                                                        | 3.434                          | 1386.39            | 4760.46            | 5.939                          | 1135.23            | 6742.20            |
| A_68_P24513815 | chr6:65728982-65729026                            | NM_027547:49        | Prdm5      | INSIDE                 | 3.419                                                        | 8.570                          | 852.11             | 7302.43            | 29.302                         | 723.73             | 21206.73           |
| A_68_P31713385 | chr18:53624187-53624231                           | NM_001033281:9      | Prdm6      | INSIDE                 | 1.891                                                        | 2.311                          | 1897.82            | 4386.30            | 4.371                          | 1358.76            | 5938.95            |
| A_68_P20029518 | chr1:10983714-10983758                            | NM_029525:191       | Prex2      | INSIDE                 | 1.684                                                        | 7.473                          | 2583.25            | 19305.26           | 12.589                         | 1991.24            | 25067.06           |
| A_68_P30447922 | chr15:93426512-93426556                           | NM_001033217:-212   | Prickle1   | PROMOTER               | 2.106                                                        | 6.137                          | 74837.32           | 459288.20          | 12.924                         | 48581.46           | 627876.40          |
| A_68_P30447388 | chr15:93349565-93349609                           | NM_001033217:76736  | Prickle1   | INSIDE                 | 1.712                                                        | 1.704                          | 1895.94            | 3231.44            | 2.918                          | 1539.71            | 4493.14            |
| A_68_P23176712 | chr4:104782284-104782328                          | NM_178143:197       | Prkaa2     | INSIDE                 | 2.246                                                        | 5.210                          | 21364.40           | 111304.50          | 11.704                         | 15131.89           | 177100.10          |
| A_68_P23176709 | chr4:104782027-104782071                          | NM_178143:455       | Prkaa2     | INSIDE                 | 1.528                                                        | 1.581                          | 4004.06            | 6331.55            | 2.416                          | 3082.03            | 7445.24            |
| A_68_P22355467 | chr3:97462102-97462146                            | NM_182997:-10       | Prkab2     | PROMOTER               | 1.515                                                        | 4.803                          | 8266.35            | 39707.11           | 7.277                          | 6308.41            | 45903.36           |
| A_68_P22616951 | chr3:146475944-146475988                          | NM_011100:-56       | Prkacb     | PROMOTER               | 1.521                                                        | 2.762                          | 2101.38            | 5803.43            | 4.202                          | 1851.47            | 7779.21            |
| A_68_P23544552 | chr5:24414202-24414246                            | NM_001170555:103    | Prkag2     | INSIDE                 | 1.812                                                        | 7.118                          | 8413.99            | 59892.39           | 12.900                         | 7495.71            | 96696.36           |
| A_68_P23544553 | chr5:24414393-24414437                            | NM_001170555:-87    | Prkag2     | PROMOTER               | 1.566                                                        | 3.308                          | 1145.83            | 3790.78            | 5.181                          | 1015.40            | 5261.24            |
| A_68_P23544551 | chr5:24414128-24414172                            | NM_001170555:177    | Prkag2     | INSIDE                 | 1.557                                                        | 3.462                          | 747.36             | 2587.60            | 5.389                          | 642.16             | 3460.72            |
| A_68_P24133762 | chr5:139605565-139605609                          | NM_008923:120       | Prkar1b    | INSIDE                 | 1.741                                                        | 4.090                          | 4595.71            | 18798.29           | 7.122                          | 3413.53            | 24310.10           |
| A_68_P26816174 | chr9:108594858-108594902                          | NM_008924:407       | Prkar2a    | INSIDE                 | 1.608                                                        | 2.779                          | 1177.52            | 3272.61            | 4.468                          | 955.42             | 4269.21            |
| A_68_P31415137 | chr17:86567183-86567227                           | NM_011104:80        | Prkce      | INSIDE                 | 2.047                                                        | 2.450                          | 2244.27            | 5497.38            | 5.015                          | 1805.14            | 9053.30            |
| A_68_P31415143 | chr17:86567807-86567851                           | NM_011104:704       | Prkce      | INSIDE                 | 1.606                                                        | 2.633                          | 1510.89            | 3977.79            | 4.228                          | 1249.30            | 5282.05            |
| A_68_P28538319 | chr12:74685927-74685971                           | NM_008856:-79       | Prkch      | PROMOTER               | 2.273                                                        | 3.609                          | 351.00             | 1266.84            | 8.205                          | 326.89             | 2682.09            |
| A_68_P28538315 | chr12:74685369-74685413                           | NM_008856:-637      | Prkch      | PROMOTER               | 1.603                                                        | 4.059                          | 997.12             | 4046.86            | 6.506                          | 734.71             | 4779.80            |
| A_68_P28426162 | chr12:51750316-51750360                           | NM_008858:-128      | Prkd1      | PROMOTER               | 1.804                                                        | 2.988                          | 3996.06            | 11938.92           | 5.389                          | 3237.18            | 17445.42           |
| A_68_P25114625 | chr7:57033846-57033890                            | NM_133740:141       | Prrt3      | INSIDE                 | 1.572                                                        | 1.486                          | 840.46             | 1249.05            | 2.336                          | 683.42             | 1596.68            |
| A_68_P30577450 | chr16:18088960-18089004                           | NM_011172:301       | Prodh      | INSIDE                 | 1.719                                                        | 2.615                          | 2729.88            | 7138.39            | 4.496                          | 2107.54            | 9475.10            |
| A_68_P25736226 | chr8:28152855-28152901                            | NM_001039077:-148   | Prosc      | PROMOTER               | 1.754                                                        | 3.824                          | 3213.83            | 12289.94           | 6.708                          | 2627.55            | 17626.44           |
| A_68_P27926352 | chr11:75300162-75300206                           | NM_138659:-94       | Prpf8      | PROMOTER               | 1.713                                                        | 2.584                          | 2946.26            | 7613.67            | 4.425                          | 2454.06            | 10860.23           |
| A_68_P28159656 | chr11:116351010-116351061                         | NM_026364:625       | Prpsap1    | INSIDE                 | 2.269                                                        | 17.758                         | 4033.71            | 71630.06           | 40.290                         | 2464.90            | 99310.50           |
| A_68_P28159663 | chr11:116351729-116351773                         | NM_026364:-90       | Prpsap1    | PROMOTER               | 2.107                                                        | 11.663                         | 4378.77            | 51068.54           | 24.577                         | 3204.24            | 78750.14           |
| A_68_P28159701 | chr11:116359924-116359968                         | NM_026364:-8286     | Prpsap1    | PROMOTER               | 1.582                                                        | 2.957                          | 3257.37            | 9633.54            | 4.679                          | 2512.02            | 11752.83           |
| A_68_P25505713 | chr7:134615484-134615528                          | NM_145589:379       | Prr14      | INSIDE                 | 2.340                                                        | 4.798                          | 2228.95            | 10694.08           | 11.228                         | 1578.60            | 17725.31           |
| A_68_P25505711 | chr7:134615245-134615289                          | NM_145589:139       | Prr14      | INSIDE                 | 1.991                                                        | 1.548                          | 1093.16            | 1692.00            | 3.081                          | 841.95             | 2593.98            |
| A_68_P31162032 | chr17:36116207-36116251                           | NR_028516:-260      | Prr3       | PROMOTER               | 1.844                                                        | 4.839                          | 2099.54            | 10159.79           | 8.921                          | 1578.09            | 14077.99           |
| A_68_P29055232 | chr13:55574226-55574270                           | NM_001030296:8621   | Prr7       | INSIDE                 | 2.293                                                        | 2.788                          | 1306.19            | 3641.47            | 6.394                          | 1054.80            | 6744.14            |

| ProbeName      | Target position of probe on CpG island microarray | TargetID           | GeneSymbol | CpG island Description | Ratio of relative methylation (TiO <sub>2</sub> -NP/Vehicle) | Sham group                     |                    |                    | TiO <sub>2</sub> -H group      |                    |                    |
|----------------|---------------------------------------------------|--------------------|------------|------------------------|--------------------------------------------------------------|--------------------------------|--------------------|--------------------|--------------------------------|--------------------|--------------------|
|                |                                                   |                    |            |                        |                                                              | Relative methylation (Cy5/Cy3) | Cy3 signal (Input) | Cy5 signal (MeDIP) | Relative methylation (Cy5/Cy3) | Cy3 signal (Input) | Cy5 signal (MeDIP) |
| A_68_P29055172 | chr13:55565926-55565970                           | NM_001030296:321   | Prr7       | INSIDE                 | 1.859                                                        | 1.859                          | 1462.78            | 2719.55            | 3.456                          | 1167.23            | 4034.24            |
| A_68_P21491162 | chr2:104689920-104689964                          | NM_178695:65       | Prrg4      | INSIDE                 | 1.547                                                        | 2.682                          | 1472.56            | 3950.02            | 4.149                          | 1224.68            | 5081.32            |
| A_68_P28875767 | chr13:22097925-22097969                           | NM_019429:3664     | Prss16     | INSIDE                 | 1.669                                                        | 3.391                          | 1172.37            | 3975.96            | 5.660                          | 929.50             | 5260.78            |
| A_68_P28875776 | chr13:22098904-22098948                           | NM_019429:2684     | Prss16     | INSIDE                 | 1.626                                                        | 3.801                          | 2569.89            | 9769.27            | 6.181                          | 1796.94            | 11106.62           |
| A_68_P25508222 | chr7:135079466-135079510                          | NM_001081374:10751 | Prss36     | INSIDE                 | 1.945                                                        | 3.919                          | 2482.62            | 9729.37            | 7.622                          | 1728.10            | 13170.75           |
| A_68_P32143181 | chr19:46392296-46392341                           | NM_028627:9328     | Psd        | INSIDE                 | 1.833                                                        | 2.663                          | 1490.81            | 3969.84            | 4.881                          | 1320.65            | 6445.94            |
| A_68_P23062645 | chr4:83131826-83131870                            | NM_133948:446      | Psip1      | INSIDE                 | 1.878                                                        | 2.791                          | 1459.70            | 4074.48            | 5.242                          | 1255.71            | 6581.91            |
| A_68_P28523569 | chr12:72069499-72069543                           | NM_011184:-6089    | Psma3      | PROMOTER               | 1.645                                                        | 2.378                          | 192.91             | 458.66             | 3.912                          | 164.85             | 644.90             |
| A_68_P31065956 | chr17:15635037-15635081                           | NM_011185:182      | Psemb1     | INSIDE                 | 1.686                                                        | 3.282                          | 3320.49            | 10897.30           | 5.535                          | 2703.66            | 14963.44           |
| A_68_P22341205 | chr3:94690730-94690774                            | NM_008945:128      | Psemb4     | INSIDE                 | 1.559                                                        | 2.185                          | 1573.79            | 3438.45            | 3.406                          | 1288.28            | 4387.92            |
| A_68_P21149540 | chr2:38499397-38499441                            | NM_011187:8        | Psemb7     | INSIDE                 | 1.604                                                        | 2.174                          | 2497.94            | 5429.94            | 3.487                          | 1906.18            | 6647.51            |
| A_68_P21420369 | chr2:90894125-90894169                            | NM_008948:-26      | Psmc3      | PROMOTER               | 1.827                                                        | 5.506                          | 33165.50           | 182611.90          | 10.061                         | 22661.42           | 227992.10          |
| A_68_P25019829 | chr7:28834940-28834984                            | NM_011874:149      | Psmc4      | INSIDE                 | 1.634                                                        | 3.138                          | 4381.20            | 13749.46           | 5.130                          | 3217.72            | 16505.36           |
| A_68_P30990393 | chr16:96212588-96212632                           | NM_019537:-100     | Psmg1      | PROMOTER               | 1.549                                                        | 3.381                          | 2069.66            | 6997.91            | 5.238                          | 1779.04            | 9318.84            |
| A_68_P29624689 | chr14:57396463-57396507                           | NM_025682:669      | Pspc1      | INSIDE                 | 2.487                                                        | 5.474                          | 4853.09            | 26567.70           | 13.612                         | 3701.11            | 50381.05           |
| A_68_P29094155 | chr13:63664480-63664524                           | NM_008957:2326     | Ptch1      | INSIDE                 | 1.783                                                        | 5.078                          | 1136.97            | 5773.54            | 9.054                          | 940.38             | 8514.46            |
| A_68_P32760538 | chrX:152057229-152057273                          | NM_001093750:620   | Ptchd1     | INSIDE                 | 2.370                                                        | 7.084                          | 3332.40            | 23607.79           | 16.787                         | 2229.53            | 37426.19           |
| A_68_P23393512 | chr4:147662081-147662125                          | NM_001083342:-28   | Ptchd2     | PROMOTER               | 1.723                                                        | 2.265                          | 1585.17            | 3590.51            | 3.903                          | 1302.94            | 5085.97            |
| A_68_P28192906 | chr11:121691796-121691840                         | NM_029049:287      | Ptchd3     | INSIDE                 | 1.968                                                        | 3.225                          | 1636.76            | 5277.73            | 6.345                          | 1415.98            | 8984.10            |
| A_68_P26015929 | chr8:86192596-86192640                            | NM_013641:2080     | Ptger1     | INSIDE                 | 1.875                                                        | 5.992                          | 6861.71            | 41111.95           | 11.236                         | 4744.67            | 53309.83           |
| A_68_P22680840 | chr3:157229758-157229802                          | NM_011196:-75      | Ptger3     | PROMOTER               | 1.539                                                        | 3.172                          | 1382.86            | 4385.80            | 4.881                          | 1383.01            | 6749.95            |
| A_68_P30330343 | chr15:73253736-73253780                           | NM_007982:-137     | Ptk2       | PROMOTER               | 1.556                                                        | 4.901                          | 771.75             | 3782.28            | 7.628                          | 660.37             | 5037.13            |
| A_68_P31207975 | chr17:46766402-46766446                           | NM_175168:29       | Ptk7       | INSIDE                 | 1.512                                                        | 2.633                          | 12220.97           | 32171.92           | 3.980                          | 10248.26           | 40791.04           |
| A_68_P20412593 | chr1:88422665-88422709                            | NM_008972:-624     | Ptma       | PROMOTER               | 2.644                                                        | 5.930                          | 4838.46            | 28693.15           | 15.677                         | 3042.74            | 47701.42           |
| A_68_P20412608 | chr1:88424274-88424318                            | NM_008972:986      | Ptma       | INSIDE                 | 1.576                                                        | 1.716                          | 777.56             | 1334.62            | 2.705                          | 670.32             | 1813.35            |
| A_68_P23298636 | chr4:129497126-129497170                          | NM_008974:-574     | Ptp4a2     | PROMOTER               | 1.610                                                        | 1.810                          | 1757.41            | 3181.61            | 2.915                          | 1435.54            | 4185.16            |
| A_68_P23298639 | chr4:129497779-129497823                          | NM_001164745:-151  | Ptp4a2     | PROMOTER               | 1.556                                                        | 2.745                          | 1814.44            | 4980.11            | 4.270                          | 1507.66            | 6437.66            |
| A_68_P30667506 | chr16:35022484-35022528                           | NM_023587:0        | Ptp1b      | INSIDE                 | 1.897                                                        | 2.685                          | 1062.16            | 2851.96            | 5.094                          | 902.45             | 4597.00            |
| A_68_P23524104 | chr5:20561279-20561323                            | NM_011203:315      | Ptpn12     | INSIDE                 | 1.620                                                        | 2.868                          | 1128.95            | 3237.74            | 4.647                          | 1044.95            | 4855.85            |
| A_68_P28671841 | chr12:99975831-99975875                           | NM_001146199:-237  | Ptpn21     | DIVERGENT_PROMOTER     | 1.910                                                        | 3.169                          | 3504.26            | 11104.89           | 6.054                          | 2752.12            | 16661.96           |
| A_68_P22944675 | chr4:57313204-57313248                            | NM_011207:1483     | Ptpn3      | INSIDE                 | 1.531                                                        | 4.074                          | 349.23             | 1422.69            | 6.235                          | 481.41             | 3001.86            |
| A_68_P25103254 | chr7:54387461-54387505                            | NM_001163565:486   | Ptpn5      | INSIDE                 | 1.844                                                        | 3.412                          | 2019.97            | 6892.19            | 6.290                          | 1577.30            | 9921.40            |
| A_68_P23029295 | chr4:76095885-76095929                            | NM_011211:144297   | Ptprd      | INSIDE                 | 1.989                                                        | 6.927                          | 2157.13            | 14942.00           | 13.775                         | 1517.81            | 20907.64           |
| A_68_P25553143 | chr7:142729512-142729556                          | NM_011212:28       | Ptpre      | INSIDE                 | 1.511                                                        | 3.674                          | 958.74             | 3522.72            | 5.553                          | 802.21             | 4454.28            |
| A_68_P21417961 | chr2:90420785-90420829                            | NM_008982:-2       | Ptprij     | PROMOTER               | 1.697                                                        | 5.256                          | 745.42             | 3917.71            | 8.919                          | 603.84             | 5385.76            |
| A_68_P21417960 | chr2:90420716-90420760                            | NM_008982:66       | Ptprij     | INSIDE                 | 1.650                                                        | 4.856                          | 1179.17            | 5726.52            | 8.015                          | 976.27             | 7824.66            |
| A_68_P21417962 | chr2:90420971-90421015                            | NM_008982:-188     | Ptprij     | PROMOTER               | 1.564                                                        | 4.295                          | 2423.28            | 10407.62           | 6.717                          | 1930.35            | 12966.08           |
| A_68_P31311926 | chr17:67704196-67704240                           | NM_008984:-419     | Ptprm      | PROMOTER               | 2.351                                                        | 6.912                          | 3804.89            | 26300.93           | 16.250                         | 2810.62            | 45673.54           |
| A_68_P31311922 | chr17:67703725-67703769                           | NM_008984:53       | Ptprm      | INSIDE                 | 1.814                                                        | 7.137                          | 1696.55            | 12107.99           | 12.949                         | 1365.94            | 17687.68           |
| A_68_P20352935 | chr1:75248212-75248256                            | NM_008985:12549    | Ptprm      | INSIDE                 | 1.578                                                        | 2.927                          | 2292.55            | 6709.62            | 4.618                          | 1724.70            | 7964.70            |
| A_68_P28768143 | chr12:117724447-117724491                         | NM_011215:276      | Ptprm2     | INSIDE                 | 1.691                                                        | 7.523                          | 3494.12            | 26285.46           | 12.721                         | 2807.79            | 35716.92           |
| A_68_P24877027 | chr6:137200894-137200938                          | NM_001164401:97    | Ptpro      | INSIDE                 | 2.079                                                        | 5.823                          | 4168.49            | 24271.80           | 12.108                         | 3191.65            | 38642.87           |
| A_68_P31256055 | chr17:56568653-56568712                           | NM_011218:47221    | Ptprs      | INSIDE                 | 1.963                                                        | 9.451                          | 507.20             | 4793.44            | 18.548                         | 389.72             | 7228.65            |
| A_68_P31256333 | chr17:56601586-56601630                           | NM_011218:14295    | Ptprs      | INSIDE                 | 2.352                                                        | 1.518                          | 961.67             | 1459.97            | 3.570                          | 669.84             | 2391.35            |
| A_68_P23308582 | chr4:131392468-131392512                          | NM_001083119:1703  | Ptpru      | INSIDE                 | 1.601                                                        | 2.243                          | 2002.36            | 4491.97            | 3.592                          | 1510.32            | 5425.13            |
| A_68_P28071133 | chr11:100820100-100820144                         | NM_008986:11809    | Ptprf      | INSIDE                 | 1.556                                                        | 3.925                          | 2274.88            | 8928.80            | 6.107                          | 1679.27            | 10254.57           |
| A_68_P28071137 | chr11:100820628-100820672                         | NM_008986:11279    | Ptprf      | INSIDE                 | 1.626                                                        | 2.201                          | 271.72             | 598.16             | 3.580                          | 237.92             | 851.66             |

| ProbeName      | Target position of probe on CpG island microarray | TargetID            | GeneSymbol | CpG island Description | Ratio of relative methylation (TiO <sub>2</sub> -NP/Vehicle) | Sham group                     |                    |                    | TiO <sub>2</sub> -H group      |                    |                    |
|----------------|---------------------------------------------------|---------------------|------------|------------------------|--------------------------------------------------------------|--------------------------------|--------------------|--------------------|--------------------------------|--------------------|--------------------|
|                |                                                   |                     |            |                        |                                                              | Relative methylation (Cy5/Cy3) | Cy3 signal (Input) | Cy5 signal (MeDIP) | Relative methylation (Cy5/Cy3) | Cy3 signal (Input) | Cy5 signal (MeDIP) |
| A_68_P23301755 | chr4:130219531-130219575                          | NM_001159603:279    | Pum1       | INSIDE                 | 1.541                                                        | 2.281                          | 1424.00            | 3247.45            | 3.515                          | 1128.39            | 3965.86            |
| A_68_P23981859 | chr5:111209498-111209542                          | NM_001025561:95     | Pus1       | INSIDE                 | 1.538                                                        | 2.394                          | 3325.28            | 7960.55            | 3.681                          | 2575.26            | 9480.36            |
| A_68_P26464014 | chr9:43611501-43611545                            | NM_021424:58864     | Pvrl1      | INSIDE                 | 1.964                                                        | 6.335                          | 2397.16            | 15184.99           | 12.442                         | 1497.26            | 18628.77           |
| A_68_P26464017 | chr9:43611785-43611829                            | NM_021424:59148     | Pvrl1      | INSIDE                 | 1.803                                                        | 5.219                          | 1554.17            | 8111.24            | 9.408                          | 1038.88            | 9773.69            |
| A_68_P26463576 | chr9:43553455-43553499                            | NM_021424:818       | Pvrl1      | INSIDE                 | 1.635                                                        | 2.694                          | 1269.60            | 3420.11            | 4.405                          | 1012.01            | 4458.27            |
| A_68_P23978770 | chr5:110715093-110715137                          | NM_008993:73        | Pxmp2      | INSIDE                 | 1.763                                                        | 2.563                          | 2154.39            | 5520.74            | 4.518                          | 1822.63            | 8234.37            |
| A_68_P23978771 | chr5:110715204-110715248                          | NM_008993:-39       | Pxmp2      | DIVERGENT_PROMOTER     | 1.679                                                        | 2.132                          | 1477.40            | 3149.50            | 3.579                          | 1219.87            | 4365.70            |
| A_68_P21740964 | chr2:150612823-150612867                          | NM_153781:313       | Pygb       | INSIDE                 | 1.544                                                        | 4.723                          | 1686.40            | 7964.35            | 7.293                          | 1405.35            | 10248.92           |
| A_68_P26630339 | chr9:72773100-72773144                            | NM_028116:-334      | Pygo1      | PROMOTER               | 1.536                                                        | 1.416                          | 2378.36            | 3368.63            | 2.176                          | 2002.26            | 4356.21            |
| A_68_P22319359 | chr3:89234506-89234550                            | NM_026869:-230      | Pygo2      | PROMOTER               | 1.822                                                        | 4.307                          | 2831.88            | 12197.24           | 7.846                          | 2355.22            | 18479.47           |
| A_68_P28077571 | chr11:101968496-101968540                         | NM_145435:572       | Pyy        | INSIDE                 | 1.654                                                        | 8.867                          | 1245.68            | 11045.37           | 14.664                         | 1014.87            | 14881.73           |
| A_68_P21490977 | chr2:104656727-104656771                          | NM_001123327:105    | Qser1      | INSIDE                 | 2.622                                                        | 8.015                          | 3488.35            | 27959.02           | 21.018                         | 2688.77            | 56512.11           |
| A_68_P31107655 | chr17:26122056-26122100                           | NM_153140:36727     | Rab11fip3  | DOWNSTREAM             | 1.712                                                        | 6.619                          | 986.65             | 6530.67            | 11.332                         | 855.11             | 9690.13            |
| A_68_P24604715 | chr6:85324050-85324094                            | NM_001003955:556    | Rab11fip5  | INSIDE                 | 2.343                                                        | 8.621                          | 4194.89            | 36164.41           | 20.197                         | 2530.98            | 51118.48           |
| A_68_P21132202 | chr2:35056385-35056429                            | NM_026697:234       | Rab14      | INSIDE                 | 1.617                                                        | 2.312                          | 2909.12            | 6724.51            | 3.738                          | 2509.32            | 9380.51            |
| A_68_P27468929 | chr10:114752147-114752191                         | NM_024454:479       | Rab21      | INSIDE                 | 1.822                                                        | 1.708                          | 878.80             | 1500.72            | 3.111                          | 731.83             | 2276.69            |
| A_68_P21871012 | chr2:173485328-173485372                          | NM_024436:5         | Rab22a     | INSIDE                 | 1.864                                                        | 3.810                          | 1753.20            | 6679.06            | 7.102                          | 1469.63            | 10436.92           |
| A_68_P22715106 | chr4:8463176-8463220                              | NM_021518:408       | Rab2a      | INSIDE                 | 1.511                                                        | 2.557                          | 1306.31            | 3340.23            | 3.864                          | 1128.70            | 4361.49            |
| A_68_P31302584 | chr17:66121929-66121973                           | NM_133685:142       | Rab31      | INSIDE                 | 1.524                                                        | 5.368                          | 2447.72            | 13138.28           | 8.182                          | 2211.95            | 18098.76           |
| A_68_P24618284 | chr6:87761631-87761675                            | NM_133717:-1904     | Rab43      | PROMOTER               | 1.607                                                        | 3.902                          | 5101.09            | 19903.73           | 6.270                          | 4202.66            | 26351.13           |
| A_68_P27542729 | chr10:128133023-128133067                         | NM_177411:280       | Rab5b      | INSIDE                 | 1.691                                                        | 2.472                          | 2685.10            | 6638.46            | 4.180                          | 2268.41            | 9481.84            |
| A_68_P26783904 | chr9:103014963-103015007                          | NM_173781:581       | Rab6b      | INSIDE                 | 1.876                                                        | 6.996                          | 3134.89            | 21931.57           | 13.124                         | 2261.49            | 29680.34           |
| A_68_P21142183 | chr2:37307736-37307780                            | NM_001033960:-15    | Rabgap1    | PROMOTER               | 1.596                                                        | 5.228                          | 3556.66            | 18595.17           | 8.346                          | 2877.40            | 24014.49           |
| A_68_P20768477 | chr1:162723220-162723264                          | NM_013862:-173      | Rabgap11   | PROMOTER               | 2.414                                                        | 12.018                         | 13257.93           | 159330.70          | 29.007                         | 7275.12            | 211026.50          |
| A_68_P30426169 | chr15:89422304-89422348                           | NM_026817:28        | Rab12      | INSIDE                 | 1.575                                                        | 3.008                          | 939.82             | 2826.53            | 4.737                          | 772.82             | 3660.98            |
| A_68_P24156969 | chr5:144288624-144288668                          | NM_009007:215       | Rac1       | INSIDE                 | 1.514                                                        | 2.574                          | 1631.45            | 4199.18            | 3.897                          | 1284.55            | 5006.06            |
| A_68_P27840810 | chr11:59919914-59919958                           | NM_009021:1422      | Rai1       | INSIDE                 | 2.563                                                        | 8.736                          | 3024.48            | 26422.84           | 22.390                         | 2287.83            | 51223.82           |
| A_68_P27841048 | chr11:59954437-59954481                           | NM_001037764:875    | Rai1       | INSIDE                 | 1.689                                                        | 8.399                          | 414.52             | 3481.42            | 14.186                         | 380.45             | 5397.20            |
| A_68_P27840800 | chr11:59918733-59918777                           | NM_009021:240       | Rai1       | INSIDE                 | 1.656                                                        | 3.280                          | 677.65             | 2222.45            | 5.431                          | 517.12             | 2808.25            |
| A_68_P21782725 | chr2:158235581-158235625                          | NM_177658:14        | Ralgapb    | INSIDE                 | 1.795                                                        | 2.817                          | 1325.13            | 3733.54            | 5.058                          | 1159.90            | 5866.99            |
| A_68_P21091625 | chr2:28389284-28389328                            | NM_001145835:323    | Ralgds     | INSIDE                 | 1.522                                                        | 1.960                          | 879.08             | 1722.93            | 2.982                          | 703.10             | 2096.69            |
| A_68_P21762364 | chr2:154617306-154617350                          | NM_001139511:483    | Raly       | INSIDE                 | 2.443                                                        | 9.092                          | 3562.21            | 32388.11           | 22.209                         | 2473.01            | 54924.23           |
| A_68_P21762360 | chr2:154616838-154616882                          | NM_001139511:15     | Raly       | INSIDE                 | 1.600                                                        | 2.771                          | 2007.08            | 5561.51            | 4.434                          | 1712.11            | 7591.07            |
| A_68_P24086564 | chr5:129526514-129526558                          | NM_009391:506       | Ran        | INSIDE                 | 1.940                                                        | 3.942                          | 1831.96            | 7220.91            | 7.645                          | 1437.02            | 10986.09           |
| A_68_P24086565 | chr5:129526623-129526667                          | NM_009391:614       | Ran        | INSIDE                 | 1.639                                                        | 2.574                          | 1550.69            | 3991.92            | 4.220                          | 1358.16            | 5731.75            |
| A_68_P32054980 | chr19:29887444-29887488                           | NM_177721:-2        | Ranbp6     | PROMOTER               | 1.765                                                        | 2.134                          | 1348.08            | 2877.14            | 3.766                          | 1137.32            | 4283.48            |
| A_68_P27921007 | chr11:74336152-74336196                           | NM_001015046:67486  | Rap1gap2   | INSIDE                 | 1.769                                                        | 3.183                          | 828.38             | 2636.47            | 5.632                          | 709.37             | 3994.99            |
| A_68_P22572454 | chr3:138738598-138738642                          | NM_001040690-457    | Rap1gds1   | PROMOTER               | 1.777                                                        | 6.223                          | 1452.24            | 9037.25            | 11.060                         | 1227.37            | 13575.00           |
| A_68_P22182581 | chr3:61168376-61168420                            | NM_028712:-30       | Rap2b      | PROMOTER               | 1.732                                                        | 3.914                          | 4615.79            | 18064.14           | 6.779                          | 3329.52            | 22571.76           |
| A_68_P21098343 | chr2:29475430-29475474                            | NM_001039086:213    | Rapgef1    | INSIDE                 | 1.529                                                        | 1.667                          | 532.10             | 886.98             | 2.548                          | 499.46             | 1272.59            |
| A_68_P21099263 | chr2:29602898-29602942                            | NM_001039086:127681 | Rapgef1    | DOWNSTREAM             | 1.784                                                        | 1.437                          | 1080.70            | 1553.22            | 2.563                          | 938.01             | 2404.52            |
| A_68_P28774236 | chr12:118772882-118772926                         | NM_175930:17953     | Rapgef5    | INSIDE                 | 1.573                                                        | 1.763                          | 672.93             | 1186.15            | 2.773                          | 608.43             | 1687.13            |
| A_68_P27810583 | chr11:54336349-54336393                           | NM_175258:22        | Rapgef6    | INSIDE                 | 1.627                                                        | 2.089                          | 939.96             | 1963.23            | 3.398                          | 789.84             | 2684.12            |
| A_68_P28058844 | chr11:98698263-98698307                           | NM_001080925:186    | Rapgef11   | INSIDE                 | 1.643                                                        | 2.311                          | 1746.35            | 4035.94            | 3.797                          | 1653.93            | 6279.52            |
| A_68_P28059604 | chr11:98821830-98821874                           | NM_001176528:68     | Rara       | INSIDE                 | 2.846                                                        | 9.755                          | 2977.11            | 29040.29           | 27.760                         | 2211.13            | 61381.64           |
| A_68_P25669976 | chr8:13677580-13677624                            | NM_009025:-15       | Rasa3      | PROMOTER               | 1.618                                                        | 2.401                          | 1590.19            | 3818.17            | 3.885                          | 1295.35            | 5032.82            |
| A_68_P24040030 | chr5:121099321-121099365                          | NM_013832:512       | Rasal1     | INSIDE                 | 1.573                                                        | 2.490                          | 6047.64            | 15060.88           | 3.917                          | 4697.18            | 18400.08           |

| ProbeName      | Target position of probe on CpG island microarray | TargetID            | GeneSymbol | CpG island Description | Ratio of relative methylation (TiO <sub>2</sub> -NP/Vehicle) | Sham group                     |                    |                    | TiO <sub>2</sub> -H group      |                    |                    |
|----------------|---------------------------------------------------|---------------------|------------|------------------------|--------------------------------------------------------------|--------------------------------|--------------------|--------------------|--------------------------------|--------------------|--------------------|
|                |                                                   |                     |            |                        |                                                              | Relative methylation (Cy5/Cy3) | Cy3 signal (Input) | Cy5 signal (MeDIP) | Relative methylation (Cy5/Cy3) | Cy3 signal (Input) | Cy5 signal (MeDIP) |
| A_68_P23018376 | chr4:73436995-73437039                            | NM_001017427:-510   | Rasef      | PROMOTER               | 1.993                                                        | 7.837                          | 1435.05            | 11246.82           | 15.617                         | 1145.53            | 17889.46           |
| A_68_P29222297 | chr13:92901976-92902020                           | NM_009027:-549      | Rasgrf2    | PROMOTER               | 1.551                                                        | 15.440                         | 1145.93            | 17693.03           | 23.952                         | 845.42             | 20249.63           |
| A_68_P31934467 | chr19:6399578-6399622                             | NM_011242:-982      | Rasgrp2    | PROMOTER               | 1.756                                                        | 4.373                          | 2869.09            | 12545.09           | 7.679                          | 2161.16            | 16595.64           |
| A_68_P23801768 | chr5:74591245-74591289                            | NM_026878:-84       | Rasl11b    | PROMOTER               | 1.543                                                        | 4.567                          | 3818.49            | 17438.72           | 7.045                          | 3002.06            | 21150.25           |
| A_68_P23801771 | chr5:74591574-74591618                            | NM_026878:246       | Rasl11b    | INSIDE                 | 1.535                                                        | 2.669                          | 1030.92            | 2751.48            | 4.097                          | 893.49             | 3660.55            |
| A_68_P27503761 | chr10:120913745-120913792                         | NM_138956:-462      | Rassf3     | PROMOTER               | 2.197                                                        | 2.114                          | 470.03             | 993.45             | 4.644                          | 376.06             | 1746.53            |
| A_68_P20614481 | chr1:133141395-133141439                          | NM_018750:339       | Rassf5     | INSIDE                 | 2.006                                                        | 1.595                          | 980.47             | 1563.95            | 3.200                          | 835.62             | 2674.01            |
| A_68_P25587467 | chr7:148401624-148401668                          | NM_025886:-112      | Rassf7     | DIVERGENT_PROMOTER     | 1.684                                                        | 3.437                          | 3882.06            | 13343.77           | 5.788                          | 2929.80            | 16958.03           |
| A_68_P31784091 | chr18:66094837-66094881                           | NM_013833:3885      | Rax        | INSIDE                 | 2.190                                                        | 7.709                          | 3926.57            | 30268.81           | 16.880                         | 2989.95            | 50470.21           |
| A_68_P23296217 | chr4:129012516-129012560                          | NM_009030:76        | Rbbp4      | INSIDE                 | 2.108                                                        | 2.519                          | 1338.36            | 3371.92            | 5.310                          | 1049.62            | 5573.84            |
| A_68_P23296219 | chr4:129012748-129012792                          | NM_009030:-156      | Rbbp4      | DIVERGENT_PROMOTER     | 1.909                                                        | 4.649                          | 4131.98            | 19209.22           | 8.876                          | 3331.75            | 29571.28           |
| A_68_P23296214 | chr4:129012152-129012196                          | NM_009030:440       | Rbbp4      | INSIDE                 | 1.573                                                        | 0.381                          | 1028.53            | 392.14             | 0.600                          | 1088.76            | 652.93             |
| A_68_P31496424 | chr18:11815840-11815884                           | NM_001081223:-488   | Rbbp8      | PROMOTER               | 2.031                                                        | 5.306                          | 1302.81            | 6913.15            | 10.775                         | 937.39             | 10100.56           |
| A_68_P31862858 | chr18:80389262-80389306                           | NM_199197:8074      | Rbfa       | INSIDE                 | 1.646                                                        | 1.852                          | 375.68             | 695.88             | 3.049                          | 324.99             | 990.77             |
| A_68_P30353507 | chr15:77137504-77137548                           | NM_001110827:-43    | Rbfox2     | PROMOTER               | 1.715                                                        | 2.280                          | 405.10             | 923.60             | 3.911                          | 360.13             | 1408.46            |
| A_68_P28174620 | chr11:118768747-118768791                         | NM_001024931:2118   | Rbfox3     | INSIDE                 | 1.899                                                        | 5.324                          | 5970.48            | 31785.57           | 10.112                         | 4426.10            | 44755.41           |
| A_68_P28172267 | chr11:118430861-118430905                         | NM_001024931:340004 | Rbfox3     | INSIDE                 | 1.851                                                        | 7.994                          | 1742.26            | 13928.25           | 14.799                         | 1321.84            | 19561.59           |
| A_68_P28174632 | chr11:118769905-118769949                         | NM_001024931:960    | Rbfox3     | INSIDE                 | 1.555                                                        | 2.369                          | 1467.31            | 3476.28            | 3.685                          | 1339.73            | 4937.01            |
| A_68_P22405709 | chr3:107135696-107135740                          | NM_001045807:489    | Rbm15      | INSIDE                 | 1.627                                                        | 3.136                          | 3799.14            | 11913.80           | 5.103                          | 3192.75            | 16291.12           |
| A_68_P26805694 | chr9:106789235-106789279                          | NM_175402:75        | Rbm15b     | INSIDE                 | 1.609                                                        | 4.059                          | 394.04             | 1599.22            | 6.532                          | 333.52             | 2178.54            |
| A_68_P32183826 | chr19:53751832-53751876                           | NM_001170847:59     | Rbm20      | INSIDE                 | 1.813                                                        | 6.095                          | 2886.04            | 17589.61           | 11.050                         | 2309.40            | 25517.88           |
| A_68_P31654583 | chr18:42435328-42435372                           | NM_172626:344       | Rbm27      | INSIDE                 | 1.724                                                        | 3.406                          | 3192.91            | 10873.86           | 5.870                          | 2639.01            | 15490.72           |
| A_68_P21769931 | chr2:156005366-156005410                          | NM_133242:588       | Rbm39      | INSIDE                 | 1.951                                                        | 4.336                          | 1368.97            | 5936.39            | 8.462                          | 1195.59            | 10116.89           |
| A_68_P25032744 | chr7:31435111-31435155                            | NM_133693:115       | Rbm42      | INSIDE                 | 1.783                                                        | 4.162                          | 759.76             | 3161.83            | 7.420                          | 589.95             | 4377.41            |
| A_68_P26811550 | chr9:107775126-107775170                          | NM_011251:2         | Rbm6       | INSIDE                 | 1.600                                                        | 4.161                          | 612.46             | 2548.65            | 6.658                          | 519.94             | 3461.97            |
| A_68_P26492138 | chr9:48303203-48303247                            | NM_144948:211       | Rbm7       | INSIDE                 | 1.755                                                        | 2.232                          | 1857.66            | 4146.27            | 3.916                          | 1461.89            | 5724.85            |
| A_68_P21261140 | chr2:60719287-60719331                            | NM_001141931:187    | Rbms1      | INSIDE                 | 1.801                                                        | 2.769                          | 209.34             | 579.69             | 4.988                          | 235.88             | 1176.47            |
| A_68_P32365934 | chrX:46048429-46048473                            | NM_173376:270       | Rbmx2      | INSIDE                 | 2.338                                                        | 12.123                         | 3931.16            | 47655.81           | 28.346                         | 2266.75            | 64254.35           |
| A_68_P32365932 | chrX:46048174-46048218                            | NM_173376:16        | Rbmx2      | INSIDE                 | 2.307                                                        | 1.483                          | 755.30             | 1119.85            | 3.421                          | 464.12             | 1587.86            |
| A_68_P23701554 | chr5:53982361-53982405                            | NM_001080927:570    | Rbpj       | INSIDE                 | 1.943                                                        | 2.359                          | 2601.07            | 6135.06            | 4.584                          | 2146.76            | 9839.79            |
| A_68_P26588687 | chr9:65478956-65479000                            | NM_028030:590       | Rbpms2     | INSIDE                 | 2.002                                                        | 7.101                          | 1348.61            | 9576.98            | 14.215                         | 1028.12            | 14614.30           |
| A_68_P29715887 | chr14:73543290-73543334                           | NR_033185:721       | Rcbtb2     | INSIDE                 | 1.639                                                        | 1.870                          | 715.43             | 1337.52            | 3.064                          | 603.19             | 1848.33            |
| A_68_P21494379 | chr2:105239336-105239380                          | NM_009037:118       | Rcn1       | INSIDE                 | 1.638                                                        | 2.339                          | 510.90             | 1194.90            | 3.831                          | 450.73             | 1726.56            |
| A_68_P28741731 | chr12:112278009-112278053                         | NM_198023:22        | Rcor1      | INSIDE                 | 1.538                                                        | 3.326                          | 9572.13            | 31835.52           | 5.114                          | 7748.35            | 39625.39           |
| A_68_P24904253 | chr6:142335519-142335563                          | NM_001204907:67     | Recq1      | INSIDE                 | 1.716                                                        | 2.797                          | 4496.67            | 12578.37           | 4.800                          | 3780.54            | 18145.67           |
| A_68_P30350128 | chr15:76540931-76540975                           | NM_058214:37        | Recq14     | INSIDE                 | 2.464                                                        | 4.532                          | 3611.54            | 16368.01           | 11.166                         | 2597.51            | 29002.98           |
| A_68_P24537770 | chr6:71657709-71657753                            | NM_178608:56        | Reep1      | INSIDE                 | 1.984                                                        | 8.149                          | 1094.29            | 8917.83            | 16.167                         | 912.91             | 14759.37           |
| A_68_P24537769 | chr6:71657624-71657668                            | NM_178608:-28       | Reep1      | PROMOTER               | 1.729                                                        | 4.365                          | 558.91             | 2439.40            | 7.545                          | 446.64             | 3369.74            |
| A_68_P29701956 | chr14:70944977-70945021                           | NM_180588:-59       | Reep4      | PROMOTER               | 1.739                                                        | 1.515                          | 696.61             | 1055.02            | 2.634                          | 767.89             | 2022.35            |
| A_68_P31612548 | chr18:34533141-34533185                           | NM_007874:-93       | Reep5      | PROMOTER               | 1.764                                                        | 4.572                          | 1898.17            | 8677.73            | 8.066                          | 1528.25            | 12326.48           |
| A_68_P20828236 | chr1:173433692-173433736                          | NM_019484:106       | Refbp2     | INSIDE                 | 2.045                                                        | 2.577                          | 711.82             | 1834.64            | 5.271                          | 588.31             | 3101.00            |
| A_68_P23531274 | chr5:21850512-21850556                            | NM_011261:-11       | Reln       | PROMOTER               | 1.710                                                        | 5.008                          | 3601.55            | 18035.54           | 8.563                          | 3038.50            | 26017.57           |
| A_68_P29612660 | chr14:55098640-55098684                           | NM_080726:3726      | Rem2       | INSIDE                 | 1.741                                                        | 2.457                          | 334.13             | 820.80             | 4.277                          | 262.63             | 1123.22            |
| A_68_P24428260 | chr6:48552305-48552349                            | NM_001079901:8445   | Repin1     | DOWNSTREAM             | 1.920                                                        | 5.777                          | 379.35             | 2191.66            | 11.091                         | 284.25             | 3152.55            |
| A_68_P24428222 | chr6:48547522-48547566                            | NM_001079901:3663   | Repin1     | INSIDE                 | 1.605                                                        | 2.155                          | 589.84             | 1270.92            | 3.459                          | 464.36             | 1606.02            |
| A_68_P23405733 | chr4:149745839-149745883                          | NM_001085492:89836  | Rere       | INSIDE                 | 1.697                                                        | 2.122                          | 4707.06            | 9988.62            | 3.601                          | 3562.93            | 12828.77           |
| A_68_P23407012 | chr4:149943746-149943790                          | NM_001085492:287744 | Rere       | INSIDE                 | 1.599                                                        | 1.670                          | 531.33             | 887.33             | 2.670                          | 426.21             | 1138.07            |

| ProbeName      | Target position of probe on CpG Island microarray | TargetID            | GeneSymbol | CpG island Description | Ratio of relative methylation (TiO <sub>2</sub> -NP/Vehicle) | Sham group                     |                    |                    | TiO <sub>2</sub> -H group      |                    |                    |
|----------------|---------------------------------------------------|---------------------|------------|------------------------|--------------------------------------------------------------|--------------------------------|--------------------|--------------------|--------------------------------|--------------------|--------------------|
|                |                                                   |                     |            |                        |                                                              | Relative methylation (Cy5/Cy3) | Cy3 signal (Input) | Cy5 signal (MeDIP) | Relative methylation (Cy5/Cy3) | Cy3 signal (Input) | Cy5 signal (MeDIP) |
| A_68_P20157818 | chr1:38186099-38186143                            | NM_019570:387       | Rev1       | INSIDE                 | 1.762                                                        | 4.318                          | 390.96             | 1688.19            | 7.608                          | 378.46             | 2879.32            |
| A_68_P27080350 | chr10:39452886-39452930                           | NM_011264:943       | Rev31      | INSIDE                 | 1.835                                                        | 9.042                          | 2510.01            | 22694.51           | 16.596                         | 1771.06            | 29392.16           |
| A_68_P27080342 | chr10:39452039-39452083                           | NM_011264:95        | Rev31      | INSIDE                 | 1.627                                                        | 2.038                          | 1075.82            | 2192.25            | 3.315                          | 865.77             | 2869.70            |
| A_68_P27283985 | chr10:80024218-80024262                           | NM_025852:65        | Rexo1      | INSIDE                 | 1.893                                                        | 1.853                          | 1490.13            | 2761.57            | 3.509                          | 1217.01            | 4270.00            |
| A_68_P21081484 | chr2:26819762-26819806                            | NM_207234:122       | Rexo4      | INSIDE                 | 2.111                                                        | 1.454                          | 1049.76            | 1526.60            | 3.069                          | 779.46             | 2392.39            |
| A_68_P24020335 | chr5:117838986-117839030                          | NM_028128:24        | Rfc5       | INSIDE                 | 1.641                                                        | 4.483                          | 893.29             | 4004.39            | 7.355                          | 861.69             | 6337.96            |
| A_68_P27968802 | chr11:82684465-82684509                           | NM_001164570:-240   | Rffl       | PROMOTER               | 1.706                                                        | 5.404                          | 105512.20          | 570240.10          | 9.220                          | 70913.33           | 653851.00          |
| A_68_P26017904 | chr8:86591013-86591057                            | NM_009055:300       | Rfx1       | INSIDE                 | 2.220                                                        | 4.457                          | 1742.64            | 7766.47            | 9.895                          | 1449.24            | 14340.14           |
| A_68_P31258630 | chr17:56969214-56969258                           | NM_009056:1195      | Rfx2       | INSIDE                 | 1.925                                                        | 6.313                          | 5662.42            | 35747.04           | 12.150                         | 4694.45            | 57039.64           |
| A_68_P22341452 | chr3:94758251-94758295                            | NM_017395:-664      | Rfx5       | PROMOTER               | 1.892                                                        | 1.986                          | 1160.58            | 2305.20            | 3.759                          | 985.55             | 3704.39            |
| A_68_P22149943 | chr3:54611747-54611791                            | NM_133231:-55       | Rfxap      | PROMOTER               | 1.927                                                        | 4.905                          | 1112.94            | 5459.44            | 9.453                          | 945.98             | 8942.71            |
| A_68_P30778982 | chr16:56037716-56037760                           | NM_029092:149       | Rg9mtd1    | INSIDE                 | 1.742                                                        | 2.409                          | 1190.64            | 2868.44            | 4.197                          | 1272.69            | 5341.78            |
| A_68_P32567036 | chrX:99266249-99266293                            | NM_183318:376       | Rgag4      | INSIDE                 | 1.879                                                        | 8.946                          | 4538.15            | 40597.66           | 16.807                         | 2317.83            | 38955.67           |
| A_68_P31151050 | chr17:34067192-34067236                           | NM_009059:376       | Rgl2       | INSIDE                 | 1.662                                                        | 1.844                          | 5165.90            | 9526.14            | 3.065                          | 3410.57            | 10453.66           |
| A_68_P25228678 | chr7:80521046-80521090                            | NM_177740:663       | Rgma       | INSIDE                 | 4.245                                                        | 0.556                          | 663.33             | 368.98             | 2.361                          | 644.67             | 1522.29            |
| A_68_P31067776 | chr17:15968184-15968228                           | NM_178615:-4656     | Rgmb       | PROMOTER               | 1.591                                                        | 2.104                          | 1439.15            | 3027.84            | 3.347                          | 1305.65            | 4370.41            |
| A_68_P22872576 | chr4:43591441-43591485                            | NM_172866:-144      | Rgp1       | PROMOTER               | 1.879                                                        | 2.255                          | 663.43             | 1495.70            | 4.236                          | 480.39             | 2035.06            |
| A_68_P23597150 | chr5:35292277-35292321                            | NM_173402:202       | Rgs12      | INSIDE                 | 1.765                                                        | 6.421                          | 322.42             | 2070.34            | 11.335                         | 287.78             | 3261.91            |
| A_68_P28587837 | chr12:83718482-83718526                           | NM_015812:480       | Rgs6       | INSIDE                 | 1.865                                                        | 4.469                          | 5923.59            | 26471.32           | 8.335                          | 4024.42            | 33544.94           |
| A_68_P25050056 | chr7:36369864-36369908                            | NM_145840:715       | Rgs9bp     | INSIDE                 | 1.666                                                        | 3.717                          | 1154.63            | 4292.02            | 6.192                          | 1035.92            | 6414.88            |
| A_68_P27953576 | chr11:80114526-80114570                           | NM_139228:135       | Rhbdl3     | INSIDE                 | 2.047                                                        | 5.408                          | 2493.11            | 13483.69           | 11.071                         | 1887.05            | 20891.68           |
| A_68_P25262217 | chr7:86762595-86762639                            | NM_019799:-73       | Rheg       | PROMOTER               | 2.277                                                        | 16.815                         | 2412.43            | 40564.86           | 38.284                         | 1425.80            | 54585.64           |
| A_68_P26814202 | chr9:108209138-108209182                          | NM_016802:625       | Rhoa       | INSIDE                 | 2.073                                                        | 11.208                         | 7900.79            | 88551.97           | 23.233                         | 4693.18            | 109038.70          |
| A_68_P28222996 | chr12:8506600-8506644                             | NM_007483:169       | Rhob       | INSIDE                 | 3.027                                                        | 29.504                         | 8519.70            | 251363.70          | 89.305                         | 4297.86            | 383821.30          |
| A_68_P27222450 | chr10:68675577-68675621                           | NM_001081347:194    | Rhobtb1    | INSIDE                 | 1.603                                                        | 3.581                          | 5360.76            | 19199.15           | 5.739                          | 4084.46            | 23442.44           |
| A_68_P29152220 | chr13:76081481-76081525                           | NM_028493:-230      | Rhobtb3    | PROMOTER               | 1.969                                                        | 2.960                          | 1198.54            | 3547.32            | 5.827                          | 851.95             | 4963.87            |
| A_68_P31420286 | chr17:87362969-87363013                           | NM_145491:540       | Rhoq       | INSIDE                 | 1.679                                                        | 3.749                          | 3149.75            | 11807.75           | 6.296                          | 2640.34            | 16622.98           |
| A_68_P31420283 | chr17:87362407-87362451                           | NM_145491:-22       | Rhoq       | PROMOTER               | 2.143                                                        | 2.059                          | 433.01             | 891.59             | 4.412                          | 401.47             | 1771.37            |
| A_68_P31106682 | chr17:25981519-25981564                           | NM_145999:255       | Rhot2      | INSIDE                 | 1.566                                                        | 5.770                          | 2491.85            | 14378.33           | 9.036                          | 1778.26            | 16068.59           |
| A_68_P25585272 | chr7:148043313-148043357                          | NM_053194:39        | Ric8       | INSIDE                 | 1.548                                                        | 1.798                          | 1175.98            | 2113.99            | 2.783                          | 980.39             | 2728.28            |
| A_68_P23245805 | chr4:119164931-119164975                          | NM_177572:251       | Rimk1a     | INSIDE                 | 1.970                                                        | 1.959                          | 817.12             | 1601.11            | 3.860                          | 738.33             | 2849.76            |
| A_68_P20085264 | chr1:22812557-22812601                            | NM_001012623:-15    | Rims1      | PROMOTER               | 1.884                                                        | 3.168                          | 5138.64            | 16277.20           | 5.969                          | 3944.43            | 23542.48           |
| A_68_P20083589 | chr1:22540314-22540358                            | NM_001012623:272227 | Rims1      | INSIDE                 | 1.660                                                        | 1.572                          | 1340.67            | 2107.75            | 2.610                          | 1166.78            | 3045.41            |
| A_68_P28936016 | chr13:34094703-34094748                           | NM_009068:-17       | Ripk1      | DIVERGENT_PROMOTER     | 2.369                                                        | 5.834                          | 3745.72            | 21850.67           | 13.820                         | 2666.49            | 36851.95           |
| A_68_P22315261 | chr3:88520728-88520772                            | NM_001163310:-25    | Rit1       | PROMOTER               | 1.712                                                        | 4.393                          | 2291.16            | 10065.31           | 7.521                          | 1802.82            | 13558.61           |
| A_68_P26135404 | chr8:108218075-108218119                          | NM_001033320:3291   | Rltpr      | INSIDE                 | 1.520                                                        | 1.873                          | 10467.60           | 19607.79           | 2.848                          | 8262.30            | 23530.51           |
| A_68_P31929627 | chr19:5602038-5602082                             | NM_026616:188       | Rnaseh2c   | INSIDE                 | 1.822                                                        | 5.312                          | 2264.08            | 12027.24           | 9.679                          | 1871.49            | 18114.83           |
| A_68_P31929629 | chr19:5602275-5602319                             | NM_026616:424       | Rnaseh2c   | INSIDE                 | 1.733                                                        | 2.818                          | 461.91             | 1301.47            | 4.883                          | 438.90             | 2143.20            |
| A_68_P21212091 | chr2:51004685-51004729                            | NM_028810:-75       | Rnd3       | PROMOTER               | 2.108                                                        | 2.277                          | 362.08             | 824.64             | 4.800                          | 271.24             | 1301.97            |
| A_68_P28598116 | chr12:85750091-85750135                           | NM_025525:-8037     | Rnf113a2   | PROMOTER               | 1.952                                                        | 7.688                          | 929.08             | 7143.04            | 15.009                         | 656.03             | 9846.31            |
| A_68_P27278802 | chr10:79229397-79229442                           | NM_144528:247       | Rnf126     | INSIDE                 | 1.974                                                        | 4.084                          | 5437.70            | 22205.53           | 8.062                          | 4054.43            | 32684.99           |
| A_68_P31542491 | chr18:21160534-21160578                           | NM_019706:715       | Rnf138     | INSIDE                 | 2.507                                                        | 6.232                          | 7347.22            | 45784.44           | 15.622                         | 4984.46            | 77866.60           |
| A_68_P30250719 | chr15:58720548-58720592                           | NM_175226:-213      | Rnf139     | PROMOTER               | 1.647                                                        | 4.295                          | 875.77             | 3761.37            | 7.074                          | 754.23             | 5335.61            |
| A_68_P29011797 | chr13:47218039-47218083                           | NM_146042:-28       | Rnf144b    | PROMOTER               | 2.239                                                        | 1.629                          | 928.54             | 1512.30            | 3.647                          | 772.40             | 2816.58            |
| A_68_P28991174 | chr13:43711396-43711440                           | NM_183204:253       | Rnf182     | INSIDE                 | 1.552                                                        | 4.911                          | 1583.61            | 7776.79            | 7.619                          | 1313.01            | 10004.08           |
| A_68_P30137691 | chr15:36213148-36213192                           | NM_013923:-268      | Rnf19a     | PROMOTER               | 2.895                                                        | 7.973                          | 1368.64            | 10911.67           | 23.081                         | 795.84             | 18368.76           |
| A_68_P23234760 | chr4:117167587-117167631                          | NM_025739:1912      | Rnf220     | INSIDE                 | 1.738                                                        | 3.133                          | 2488.25            | 7795.60            | 5.446                          | 2043.22            | 11127.02           |



| ProbeName      | Target position of probe on CpG island microarray | TargetID           | GeneSymbol | CpG island Description | Ratio of relative methylation (TiO <sub>2</sub> -NP/Vehicle) | Sham group                     |                    |                    | TiO <sub>2</sub> -H group      |                    |                    |
|----------------|---------------------------------------------------|--------------------|------------|------------------------|--------------------------------------------------------------|--------------------------------|--------------------|--------------------|--------------------------------|--------------------|--------------------|
|                |                                                   |                    |            |                        |                                                              | Relative methylation (Cy5/Cy3) | Cy3 signal (Input) | Cy5 signal (MeDIP) | Relative methylation (Cy5/Cy3) | Cy3 signal (Input) | Cy5 signal (MeDIP) |
| A_68_P23234756 | chr4:117167070-117167114                          | NM_025739:2428     | Rnf220     | INSIDE                 | 1.628                                                        | 6.644                          | 1123.56            | 7465.08            | 10.820                         | 864.45             | 9353.10            |
| A_68_P27541275 | chr10:127848643-127848687                         | NM_001164237:-7    | Rnf41      | DIVERGENT_PROMOTER     | 1.883                                                        | 5.832                          | 1251.46            | 7299.10            | 10.982                         | 997.40             | 10953.87           |
| A_68_P22826133 | chr4:33397493-33397537                            | NM_011884:229      | Rngtt      | INSIDE                 | 1.659                                                        | 2.930                          | 1834.42            | 5374.19            | 4.859                          | 1525.29            | 7411.58            |
| A_68_P26430635 | chr9:37240928-37240972                            | NM_001164767:-190  | Robo3      | PROMOTER               | 1.986                                                        | 5.036                          | 3993.54            | 20110.91           | 10.002                         | 2951.93            | 29524.69           |
| A_68_P31488614 | chr18:10181658-10181702                           | NM_009071:110      | Rock1      | INSIDE                 | 1.758                                                        | 5.975                          | 3034.69            | 18133.36           | 10.504                         | 2295.97            | 24116.75           |
| A_68_P30513218 | chr16:5013781-5013827                             | NM_133185:-158     | Rogdi      | PROMOTER               | 1.634                                                        | 3.783                          | 2479.14            | 9378.26            | 6.183                          | 1863.86            | 11524.08           |
| A_68_P26352003 | chr9:22272492-22272536                            | NM_018739:286      | Rp9        | INSIDE                 | 1.937                                                        | 6.711                          | 2403.58            | 16130.31           | 13.000                         | 1977.00            | 25701.63           |
| A_68_P31121831 | chr17:28465275-28465320                           | NM_011287:-118     | Rpl10a     | PROMOTER               | 1.891                                                        | 8.952                          | 1034.42            | 9260.53            | 16.925                         | 734.71             | 12435.11           |
| A_68_P31121837 | chr17:28465985-28466029                           | NM_011287:591      | Rpl10a     | INSIDE                 | 1.585                                                        | 2.638                          | 2942.12            | 7761.29            | 4.181                          | 2365.40            | 9888.84            |
| A_68_P25091297 | chr7:52384491-52384535                            | NM_009438:-407     | Rpl13a     | PROMOTER               | 1.705                                                        | 6.002                          | 1607.98            | 9650.27            | 10.230                         | 1214.67            | 12426.62           |
| A_68_P26878665 | chr9:120486576-120486620                          | NM_025974:5965     | Rpl14      | DOWNSTREAM             | 1.684                                                        | 1.848                          | 1419.03            | 2622.10            | 3.112                          | 1187.42            | 3695.48            |
| A_68_P26878663 | chr9:120486371-120486416                          | NM_025974:5760     | Rpl14      | DOWNSTREAM             | 2.712                                                        | 1.510                          | 1244.63            | 1879.28            | 4.095                          | 974.70             | 3991.69            |
| A_68_P23418024 | chr4:151700327-151700371                          | NM_009079:362      | Rpl22      | INSIDE                 | 2.437                                                        | 4.492                          | 1567.13            | 7039.64            | 10.946                         | 1298.21            | 14210.70           |
| A_68_P30128581 | chr15:34373372-34373416                           | NM_001163485:-363  | Rpl30      | DIVERGENT_PROMOTER     | 1.902                                                        | 2.460                          | 2857.63            | 7030.14            | 4.679                          | 2030.46            | 9500.08            |
| A_68_P20165362 | chr1:39424508-39424553                            | NM_053257:-165     | Rpl31      | PROMOTER               | 1.737                                                        | 3.441                          | 688.17             | 2368.01            | 5.977                          | 527.67             | 3153.77            |
| A_68_P21151631 | chr2:38860577-38860621                            | NM_025592:53       | Rpl35      | INSIDE                 | 1.763                                                        | 2.925                          | 2620.19            | 7663.81            | 5.157                          | 2061.53            | 10630.55           |
| A_68_P25588869 | chr7:148633509-148633553                          | NM_026020:-18      | Rplp2      | DIVERGENT_PROMOTER     | 2.036                                                        | 1.443                          | 1519.74            | 2192.72            | 2.938                          | 1093.90            | 3214.10            |
| A_68_P24619664 | chr6:88035091-88035135                            | NM_133933:646      | Rpn1       | INSIDE                 | 2.023                                                        | 2.406                          | 687.90             | 1655.17            | 4.867                          | 583.12             | 2838.15            |
| A_68_P31163327 | chr17:36394876-36394920                           | NM_026308:-107     | Rpp21      | PROMOTER               | 1.952                                                        | 6.137                          | 1187.76            | 7289.19            | 11.981                         | 1029.28            | 12331.59           |
| A_68_P21780563 | chr2:157854132-157854176                          | NM_027434:-375     | Rprd1b     | PROMOTER               | 2.174                                                        | 3.021                          | 1078.36            | 3258.04            | 6.568                          | 867.01             | 5694.82            |
| A_68_P21780565 | chr2:157854409-157854453                          | NM_027434:-99      | Rprd1b     | PROMOTER               | 1.849                                                        | 2.117                          | 3552.85            | 7520.53            | 3.913                          | 2754.84            | 10779.73           |
| A_68_P25456593 | chr7:125259495-125259539                          | NM_170669:145      | Rps15a     | INSIDE                 | 2.426                                                        | 5.742                          | 1683.11            | 9663.99            | 13.927                         | 1116.17            | 15544.89           |
| A_68_P25007073 | chr7:25669913-25669957                            | NM_023133:202      | Rps19      | INSIDE                 | 1.597                                                        | 3.412                          | 1484.11            | 5063.19            | 5.450                          | 1292.39            | 7043.04            |
| A_68_P21902494 | chr2:179991894-179991938                          | NM_025587:-167     | Rps21      | PROMOTER               | 1.713                                                        | 9.493                          | 3506.19            | 33283.25           | 16.258                         | 2557.31            | 41577.61           |
| A_68_P26596131 | chr9:66794074-66794118                            | NM_026467:172      | Rps27l     | INSIDE                 | 1.506                                                        | 2.303                          | 551.36             | 1269.99            | 3.468                          | 380.12             | 1318.23            |
| A_68_P32567641 | chrX:99384743-99384787                            | NM_009094:-1054    | Rps4x      | PROMOTER               | 1.622                                                        | 2.279                          | 620.42             | 1413.98            | 3.696                          | 430.02             | 1589.15            |
| A_68_P24973639 | chr7:13507675-13507719                            | NM_009095:37       | Rps5       | INSIDE                 | 1.834                                                        | 2.127                          | 320.23             | 681.01             | 3.899                          | 316.64             | 1234.64            |
| A_68_P28314231 | chr12:29320191-29320235                           | NM_011300:606      | Rps7       | INSIDE                 | 1.539                                                        | 1.793                          | 3656.30            | 6553.99            | 2.759                          | 3029.59            | 8358.80            |
| A_68_P28956729 | chr13:37918014-37918058                           | NM_001177868:-744  | Rreb1      | PROMOTER               | 1.641                                                        | 2.736                          | 2349.87            | 6428.20            | 4.490                          | 1779.07            | 7988.06            |
| A_68_P31143302 | chr17:32173587-32173631                           | NM_028244:502      | Rrp1b      | INSIDE                 | 2.195                                                        | 6.110                          | 3200.19            | 19554.71           | 13.412                         | 2348.29            | 31494.87           |
| A_68_P31208271 | chr17:46811147-46811191                           | NM_144857:36       | Rrp36      | INSIDE                 | 1.656                                                        | 2.295                          | 5152.14            | 11824.65           | 3.800                          | 3977.79            | 15116.76           |
| A_68_P22388656 | chr3:103718191-103718235                          | NM_172684:170      | Rsb1       | INSIDE                 | 1.704                                                        | 3.997                          | 845.40             | 3378.85            | 6.812                          | 691.87             | 4712.77            |
| A_68_P25351157 | chr7:104729030-104729074                          | NM_001081267:647   | Rsf1       | INSIDE                 | 1.506                                                        | 2.725                          | 802.51             | 2186.66            | 4.104                          | 732.60             | 3006.58            |
| A_68_P24991219 | chr7:19650979-19651023                            | NM_001159671:10965 | Rsph6a     | INSIDE                 | 1.562                                                        | 5.179                          | 3800.91            | 19684.78           | 8.090                          | 2925.80            | 23668.66           |
| A_68_P23271474 | chr4:124663490-124663534                          | NM_138683:-161     | Rspo1      | PROMOTER               | 2.078                                                        | 4.498                          | 1224.00            | 5505.66            | 9.348                          | 917.28             | 8574.29            |
| A_68_P27215083 | chr10:67442230-67442274                           | NM_001081346:-93   | Rtkn2      | PROMOTER               | 1.616                                                        | 3.542                          | 8566.13            | 30338.77           | 5.723                          | 5946.50            | 34030.73           |
| A_68_P21395110 | chr2:84712227-84712271                            | NM_199223:14601    | Rtn4rl2    | INSIDE                 | 1.979                                                        | 6.057                          | 2764.73            | 16746.15           | 11.988                         | 2317.19            | 27778.80           |
| A_68_P28073802 | chr11:101286306-101286350                         | NM_172566:-70      | Rundc1     | PROMOTER               | 2.090                                                        | 4.644                          | 5587.40            | 25946.09           | 9.706                          | 3826.56            | 37141.60           |
| A_68_P23468796 | chr5:8622618-8622662                              | NM_198620:312      | Rundc3b    | INSIDE                 | 2.023                                                        | 2.921                          | 1876.82            | 5481.80            | 5.908                          | 1531.02            | 9044.67            |
| A_68_P23468797 | chr5:8622724-8622768                              | NM_198620:206      | Rundc3b    | INSIDE                 | 1.884                                                        | 1.793                          | 6375.10            | 11431.71           | 3.379                          | 5084.04            | 17177.17           |
| A_68_P31196995 | chr17:44873188-44873232                           | NM_001145920:387   | Runx2      | INSIDE                 | 1.757                                                        | 2.269                          | 882.30             | 2001.78            | 3.986                          | 705.48             | 2812.18            |
| A_68_P23326917 | chr4:134708685-134708729                          | NM_019732:32147    | Runx3      | INSIDE                 | 1.612                                                        | 3.639                          | 3739.75            | 13608.80           | 5.865                          | 2960.41            | 17362.93           |
| A_68_P22317129 | chr3:88894411-88894455                            | NM_001083808:-479  | Rusc1      | PROMOTER               | 1.816                                                        | 3.505                          | 2746.83            | 9627.80            | 6.364                          | 2121.72            | 13503.65           |
| A_68_P30013962 | chr15:10966866-10966910                           | NM_178717:835      | Rxfp3      | INSIDE                 | 1.734                                                        | 6.001                          | 3825.75            | 22960.00           | 10.408                         | 2752.13            | 28644.35           |
| A_68_P21086006 | chr2:27533318-27533362                            | NM_011305:620      | Rxra       | INSIDE                 | 1.638                                                        | 3.240                          | 1257.40            | 4074.37            | 5.307                          | 1004.52            | 5331.24            |
| A_68_P31151615 | chr17:34168722-34168766                           | NM_001205214:-12   | Rxrb       | DIVERGENT_PROMOTER     | 2.525                                                        | 2.326                          | 584.39             | 1359.19            | 5.873                          | 474.20             | 2785.18            |
| A_68_P24691294 | chr6:100237868-100237912                          | NM_019743:-538     | Rybp       | PROMOTER               | 1.656                                                        | 3.440                          | 658.40             | 2264.60            | 5.697                          | 567.63             | 3233.73            |

| ProbeName      | Target position of probe on CpG island microarray | TargetID           | GeneSymbol | CpG island Description | Ratio of relative methylation (TiO <sub>2</sub> -NP/Vehicle) | Sham group                     |                    |                    | TiO <sub>2</sub> -H group      |                    |                    |
|----------------|---------------------------------------------------|--------------------|------------|------------------------|--------------------------------------------------------------|--------------------------------|--------------------|--------------------|--------------------------------|--------------------|--------------------|
|                |                                                   |                    |            |                        |                                                              | Relative methylation (Cy5/Cy3) | Cy3 signal (Input) | Cy5 signal (MeDIP) | Relative methylation (Cy5/Cy3) | Cy3 signal (Input) | Cy5 signal (MeDIP) |
| A_68_P24691293 | chr6:100237792-100237836                          | NM_019743:-462     | Rybp       | PROMOTER               | 1.600                                                        | 3.966                          | 2131.78            | 8453.78            | 6.345                          | 1704.68            | 10815.92           |
| A_68_P26344894 | chr9:20780852-20780896                            | NM_010333:363      | S1pr2      | INSIDE                 | 1.822                                                        | 15.703                         | 5257.87            | 82562.47           | 28.611                         | 3131.07            | 89583.18           |
| A_68_P26344891 | chr9:20780545-20780589                            | NM_010333:671      | S1pr2      | INSIDE                 | 2.748                                                        | 1.576                          | 1964.61            | 3095.35            | 4.330                          | 1484.57            | 6427.85            |
| A_68_P29032310 | chr13:51503858-51503902                           | NM_010101:-106     | S1pr3      | PROMOTER               | 2.347                                                        | 4.881                          | 1406.71            | 6866.52            | 11.458                         | 969.33             | 11106.33           |
| A_68_P29648696 | chr14:61791453-61791497                           | NM_172809:34181    | Sacs       | INSIDE                 | 1.659                                                        | 3.057                          | 914.38             | 2795.69            | 5.073                          | 777.56             | 3944.66            |
| A_68_P29648697 | chr14:61791606-61791650                           | NM_172809:34335    | Sacs       | INSIDE                 | 1.517                                                        | 1.545                          | 1833.51            | 2833.14            | 2.345                          | 1362.27            | 3193.90            |
| A_68_P24981209 | chr7:16973109-16973153                            | NM_019748:4        | Sae1       | INSIDE                 | 1.745                                                        | 2.708                          | 1486.23            | 4024.38            | 4.726                          | 1180.87            | 5580.70            |
| A_68_P26044774 | chr8:91565521-91565568                            | NM_021390:2517     | Sall1      | INSIDE                 | 1.582                                                        | 4.277                          | 385.41             | 1648.29            | 6.766                          | 343.98             | 2327.19            |
| A_68_P26044646 | chr8:91549828-91549872                            | NM_021390:18211    | Sall1      | DOWNSTREAM             | 1.826                                                        | 1.816                          | 777.09             | 1411.38            | 3.317                          | 681.97             | 2261.82            |
| A_68_P31868107 | chr18:81182856-81182900                           | NM_178280:439      | Sall3      | INSIDE                 | 1.600                                                        | 3.902                          | 3523.83            | 13749.52           | 6.244                          | 2824.25            | 17633.53           |
| A_68_P21843420 | chr2:168591529-168591573                          | NM_175303:1151     | Sall4      | INSIDE                 | 1.944                                                        | 2.326                          | 400.24             | 930.99             | 4.522                          | 339.93             | 1537.30            |
| A_68_P28036074 | chr11:94871790-94871834                           | NM_146025:620      | Samd14     | INSIDE                 | 1.502                                                        | 2.501                          | 2221.81            | 5557.73            | 3.757                          | 1714.51            | 6441.51            |
| A_68_P25021894 | chr7:29221444-29221488                            | NM_175021:-256     | Samd4b     | DIVERGENT_PROMOTER     | 1.648                                                        | 4.085                          | 2074.50            | 8475.26            | 6.732                          | 1684.39            | 11340.10           |
| A_68_P26931630 | chr10:9394840-9394884                             | NM_177271:144      | Samd5      | INSIDE                 | 1.867                                                        | 2.575                          | 252.30             | 649.59             | 4.807                          | 193.73             | 931.21             |
| A_68_P23999965 | chr5:114221529-114221573                          | NM_016926:108      | Sart3      | INSIDE                 | 1.607                                                        | 2.436                          | 1029.35            | 2507.68            | 3.916                          | 916.10             | 3587.48            |
| A_68_P26926726 | chr10:8605914-8605958                             | NM_175155:-68      | Sash1      | PROMOTER               | 1.736                                                        | 2.375                          | 1853.06            | 4400.32            | 4.123                          | 1678.72            | 6920.83            |
| A_68_P31236178 | chr17:51952223-51952267                           | NM_001163630:-865  | Satb1      | PROMOTER               | 1.934                                                        | 4.659                          | 2674.30            | 12459.88           | 9.009                          | 2114.51            | 19049.22           |
| A_68_P24092948 | chr5:130731326-130731370                          | NM_023248:-16      | Sbds       | DIVERGENT_PROMOTER     | 2.697                                                        | 2.449                          | 2368.30            | 5800.12            | 6.606                          | 1776.61            | 11735.43           |
| A_68_P30463766 | chr15:96290439-96290483                           | NM_028148:814      | Scaf11     | INSIDE                 | 1.881                                                        | 1.929                          | 1477.99            | 2851.50            | 3.629                          | 1168.09            | 4239.56            |
| A_68_P21152636 | chr2:39045852-39045896                            | NM_178778:376      | Scai       | INSIDE                 | 2.003                                                        | 6.019                          | 21465.77           | 129193.80          | 12.053                         | 15269.99           | 184042.30          |
| A_68_P21152640 | chr2:39046217-39046261                            | NM_178778:12       | Scai       | INSIDE                 | 1.500                                                        | 2.913                          | 813.18             | 2369.11            | 4.370                          | 698.70             | 3053.46            |
| A_68_P26542457 | chr9:57408653-57408697                            | NM_022813:-76      | Scamp2     | DIVERGENT_PROMOTER     | 1.862                                                        | 8.524                          | 2860.02            | 24377.60           | 15.873                         | 2166.72            | 34391.44           |
| A_68_P27284238 | chr10:80065633-80065677                           | NM_019575:28       | Scamp4     | INSIDE                 | 1.557                                                        | 3.207                          | 2217.98            | 7114.18            | 4.993                          | 1596.30            | 7969.72            |
| A_68_P26533458 | chr9:55785595-55785639                            | NM_001081341:306   | Scaper     | INSIDE                 | 1.591                                                        | 1.692                          | 6215.45            | 10515.26           | 2.692                          | 5095.27            | 13718.22           |
| A_68_P22215798 | chr3:68299063-68299107                            | NR_036665:970      | Schip1     | INSIDE                 | 2.061                                                        | 4.193                          | 1799.08            | 7543.33            | 8.640                          | 1428.43            | 12341.43           |
| A_68_P28376737 | chr12:40860793-40860837                           | NM_001146196:1     | Scin       | INSIDE                 | 1.874                                                        | 8.543                          | 1868.55            | 15962.97           | 16.011                         | 1151.05            | 18429.85           |
| A_68_P20441527 | chr1:93194765-93194809                            | NM_016717:-128     | Scly       | PROMOTER               | 1.586                                                        | 4.107                          | 3339.04            | 13712.54           | 6.514                          | 2809.46            | 18299.80           |
| A_68_P26873355 | chr9:119487746-119487790                          | NM_021544:366      | Scn5a      | INSIDE                 | 1.532                                                        | 1.767                          | 1439.43            | 2543.43            | 2.708                          | 1209.86            | 3275.78            |
| A_68_P30489270 | chr15:100877044-100877088                         | NM_011323:110365   | Scn8a      | DOWNSTREAM             | 1.704                                                        | 1.428                          | 2703.94            | 3861.00            | 2.433                          | 2254.44            | 5485.81            |
| A_68_P30345853 | chr15:75900100-75900144                           | NM_134089:38       | Scrib      | INSIDE                 | 1.923                                                        | 4.663                          | 3776.94            | 17610.21           | 8.966                          | 3372.04            | 30235.25           |
| A_68_P30348856 | chr15:76348296-76348340                           | NM_130893:4241     | Sert1      | INSIDE                 | 1.861                                                        | 1.663                          | 646.71             | 1075.76            | 3.096                          | 568.99             | 1761.59            |
| A_68_P21747518 | chr2:151908021-151908065                          | NM_001160410:778   | Sert2      | INSIDE                 | 2.015                                                        | 5.702                          | 6790.30            | 38718.10           | 11.488                         | 4305.90            | 49465.33           |
| A_68_P21747609 | chr2:151919690-151919734                          | NM_001160410:12448 | Sert2      | INSIDE                 | 1.522                                                        | 7.979                          | 1606.17            | 12814.85           | 12.144                         | 1057.18            | 12838.79           |
| A_68_P30390278 | chr15:83555204-83555248                           | NM_022723:225      | Scube1     | INSIDE                 | 1.927                                                        | 4.462                          | 1759.53            | 7850.47            | 8.596                          | 1610.50            | 13843.26           |
| A_68_P22705223 | chr4:6292852-6292896                              | NM_001098227:48    | Sdcbp      | INSIDE                 | 1.618                                                        | 2.569                          | 3970.18            | 10197.67           | 4.156                          | 3264.23            | 13567.49           |
| A_68_P30572142 | chr16:17131635-17131679                           | NM_022324:820      | Sdf2l1     | INSIDE                 | 1.586                                                        | 2.415                          | 2158.71            | 5212.22            | 3.830                          | 1737.14            | 6652.61            |
| A_68_P21078770 | chr2:26301305-26301349                            | NM_153125:-590     | Sec16a     | PROMOTER               | 1.731                                                        | 2.186                          | 792.56             | 1732.82            | 3.784                          | 665.25             | 2517.04            |
| A_68_P21078768 | chr2:26301082-26301126                            | NM_153125:-368     | Sec16a     | PROMOTER               | 1.588                                                        | 5.643                          | 10762.58           | 60732.44           | 8.962                          | 7729.46            | 69269.22           |
| A_68_P30669634 | chr16:35363730-35363774                           | NM_133704:252      | Sec22a     | INSIDE                 | 1.544                                                        | 2.387                          | 1288.67            | 3075.84            | 3.686                          | 1150.47            | 4240.27            |
| A_68_P29033511 | chr13:51746883-51746927                           | NM_029279:-178     | Secisbp2   | PROMOTER               | 1.517                                                        | 2.454                          | 3102.77            | 7613.38            | 3.723                          | 2647.15            | 9854.78            |
| A_68_P27552432 | chr11:3417267-3417311                             | NM_053267:2584     | Selm       | INSIDE                 | 1.612                                                        | 2.862                          | 653.75             | 1870.73            | 4.613                          | 526.96             | 2431.08            |
| A_68_P20149055 | chr1:36615091-36615135                            | NM_001126047:114   | Sema4c     | INSIDE                 | 2.308                                                        | 2.850                          | 1328.56            | 3786.16            | 6.578                          | 972.00             | 6393.64            |
| A_68_P20149049 | chr1:36614326-36614370                            | NM_001126047:878   | Sema4c     | INSIDE                 | 1.764                                                        | 7.297                          | 6518.75            | 47565.21           | 12.870                         | 4549.54            | 58550.61           |
| A_68_P22342541 | chr3:94965423-94965467                            | NM_011351:-2851    | Sema6c     | PROMOTER               | 1.675                                                        | 3.265                          | 2048.94            | 6690.65            | 5.471                          | 1637.88            | 8960.23            |
| A_68_P30779064 | chr16:56075886-56075930                           | NM_001003972:387   | Senp7      | INSIDE                 | 1.763                                                        | 6.223                          | 2092.73            | 13022.48           | 10.970                         | 1717.71            | 18843.10           |
| A_68_P26555222 | chr9:59598670-59598714                            | NM_001172068:-236  | Senp8      | DIVERGENT_PROMOTER     | 1.739                                                        | 3.056                          | 1609.98            | 4920.90            | 5.317                          | 1312.18            | 6976.36            |
| A_68_P27167594 | chr10:58684574-58684618                           | NM_001024910:-1    | Sept10     | DIVERGENT_PROMOTER     | 1.874                                                        | 6.097                          | 4520.24            | 27558.99           | 11.425                         | 3322.33            | 37957.26           |

| ProbeName      | Target position of probe on CpG island microarray | TargetID           | GeneSymbol | CpG island Description | Ratio of relative methylation (TiO <sub>2</sub> -NP/Vehicle) | Sham group                     |                    |                    | TiO <sub>2</sub> -H group      |                    |                    |
|----------------|---------------------------------------------------|--------------------|------------|------------------------|--------------------------------------------------------------|--------------------------------|--------------------|--------------------|--------------------------------|--------------------|--------------------|
|                |                                                   |                    |            |                        |                                                              | Relative methylation (Cy5/Cy3) | Cy3 signal (Input) | Cy5 signal (MeDIP) | Relative methylation (Cy5/Cy3) | Cy3 signal (Input) | Cy5 signal (MeDIP) |
| A_68_P26365989 | chr9:25059719-25059763                            | NM_001205367:-299  | Sept7      | PROMOTER               | 1.582                                                        | 3.061                          | 4140.89            | 12675.54           | 4.843                          | 3365.70            | 16299.80           |
| A_68_P28164254 | chr11:117151837-117151881                         | NM_001113487:24299 | Sept9      | INSIDE                 | 1.918                                                        | 4.704                          | 4337.00            | 20399.80           | 9.019                          | 3424.73            | 30888.83           |
| A_68_P28163660 | chr11:117060956-117061000                         | NM_001113486:4     | Sept9      | INSIDE                 | 1.579                                                        | 3.981                          | 1641.20            | 6532.99            | 6.285                          | 1352.89            | 8503.57            |
| A_68_P31020947 | chr17:6079672-6079716                             | NM_001111017:45    | Serac1     | INSIDE                 | 2.142                                                        | 2.556                          | 2521.73            | 6444.82            | 5.475                          | 1977.12            | 10824.66           |
| A_68_P24520694 | chr6:67217359-67217403                            | NM_001113564:408   | Serbp1     | INSIDE                 | 1.510                                                        | 1.793                          | 659.14             | 1181.96            | 2.707                          | 523.12             | 1416.16            |
| A_68_P21580978 | chr2:121275537-121275581                          | NM_011354:595      | Serf2      | INSIDE                 | 1.801                                                        | 2.582                          | 3099.68            | 8003.43            | 4.651                          | 2734.38            | 12717.10           |
| A_68_P21580976 | chr2:121275325-121275369                          | NM_011354:383      | Serf2      | INSIDE                 | 1.783                                                        | 2.627                          | 1183.49            | 3109.35            | 4.685                          | 1067.15            | 4999.11            |
| A_68_P28936013 | chr13:34094245-34094289                           | NR_028309:352      | Serpincb6a | INSIDE                 | 1.667                                                        | 2.063                          | 1185.68            | 2445.85            | 3.438                          | 1038.65            | 3571.02            |
| A_68_P25017511 | chr7:28271855-28271899                            | NM_018820:-95      | Sertad1    | PROMOTER               | 1.637                                                        | 3.640                          | 3792.42            | 13803.19           | 5.956                          | 2868.55            | 17086.23           |
| A_68_P27632484 | chr11:20531833-20531877                           | NM_001038625:-125  | Sertad2    | PROMOTER               | 1.614                                                        | 3.475                          | 6104.15            | 21214.46           | 5.608                          | 4460.01            | 25012.99           |
| A_68_P27631993 | chr11:20443834-20443878                           | NM_021372:601      | Sertad2    | INSIDE                 | 1.613                                                        | 10.061                         | 10624.97           | 106902.70          | 16.231                         | 7456.42            | 121021.70          |
| A_68_P27631991 | chr11:20443663-20443707                           | NM_021372:429      | Sertad2    | INSIDE                 | 1.740                                                        | 1.563                          | 615.95             | 962.46             | 2.718                          | 770.09             | 2093.18            |
| A_68_P27091229 | chr10:41530226-41530270                           | NM_001162908:-131  | Sesn1      | DIVERGENT_PROMOTER     | 1.930                                                        | 4.951                          | 3065.18            | 15175.30           | 9.557                          | 2488.78            | 23786.35           |
| A_68_P27091644 | chr10:41607176-41607220                           | NM_001013370:-46   | Sesn1      | PROMOTER               | 1.903                                                        | 6.522                          | 2943.93            | 19199.99           | 12.412                         | 2476.28            | 30734.88           |
| A_68_P31857885 | chr18:79306491-79306535                           | NM_053099:-382     | Setbp1     | PROMOTER               | 1.642                                                        | 3.094                          | 1006.69            | 3114.38            | 5.081                          | 841.53             | 4275.84            |
| A_68_P25507242 | chr7:134920047-134920091                          | NM_178029:-834     | Setd1a     | PROMOTER               | 1.997                                                        | 4.883                          | 785.76             | 3837.16            | 9.754                          | 536.84             | 5236.52            |
| A_68_P28726319 | chr12:109416700-109416744                         | NM_028262:772      | Setd3      | INSIDE                 | 1.939                                                        | 4.260                          | 1042.01            | 4439.33            | 8.260                          | 798.11             | 6592.16            |
| A_68_P28726327 | chr12:109417619-109417664                         | NM_028262:-147     | Setd3      | DIVERGENT_PROMOTER     | 1.908                                                        | 4.603                          | 1903.06            | 8759.66            | 8.782                          | 1566.38            | 13755.89           |
| A_68_P28726321 | chr12:109416856-109416900                         | NM_028262:616      | Setd3      | INSIDE                 | 1.536                                                        | 2.422                          | 1209.78            | 2930.42            | 3.721                          | 910.50             | 3388.06            |
| A_68_P30976720 | chr16:93603886-93603930                           | NM_145482:152      | Setd4      | INSIDE                 | 1.603                                                        | 4.985                          | 4901.08            | 24430.88           | 7.990                          | 3852.54            | 30782.88           |
| A_68_P22130348 | chr3:51364282-51364326                            | NM_080793:441      | Setd7      | INSIDE                 | 1.614                                                        | 4.461                          | 2334.51            | 10415.15           | 7.201                          | 2072.84            | 14926.78           |
| A_68_P24061285 | chr5:124889815-124889859                          | NM_030241:-102     | Setd8      | PROMOTER               | 1.772                                                        | 6.736                          | 706.20             | 4756.98            | 11.934                         | 574.76             | 6858.93            |
| A_68_P31934224 | chr19:6364358-6364402                             | NM_001110791:691   | Sfi1       | INSIDE                 | 2.459                                                        | 12.680                         | 1791.20            | 22713.16           | 31.175                         | 1325.53            | 41323.44           |
| A_68_P31934221 | chr19:6363781-6363825                             | NM_001110791:113   | Sfi1       | INSIDE                 | 1.699                                                        | 2.366                          | 508.77             | 1203.74            | 4.020                          | 393.59             | 1582.14            |
| A_68_P29507580 | chr14:31529106-31529150                           | NM_001166532:328   | Sfmbt1     | INSIDE                 | 1.522                                                        | 4.440                          | 1023.75            | 4545.37            | 6.758                          | 860.17             | 5813.21            |
| A_68_P23318413 | chr4:133155649-133155693                          | NM_018754:2413     | Sfn        | DOWNSTREAM             | 1.644                                                        | 1.623                          | 1136.06            | 1843.39            | 2.668                          | 943.40             | 2516.70            |
| A_68_P23283131 | chr4:126698502-126698546                          | NM_023603:-20      | Sfpq       | PROMOTER               | 1.510                                                        | 10.628                         | 252.76             | 2686.37            | 16.045                         | 227.79             | 3654.84            |
| A_68_P25716360 | chr8:24521956-24522000                            | NM_013834:5        | Sfrp1      | INSIDE                 | 2.193                                                        | 9.499                          | 2326.53            | 22099.39           | 20.830                         | 1818.84            | 37887.13           |
| A_68_P31600224 | chr18:32070540-32070584                           | NM_026006:995      | Sft2d3     | INSIDE                 | 1.832                                                        | 5.139                          | 2574.66            | 13231.95           | 9.415                          | 2098.93            | 19762.36           |
| A_68_P25797392 | chr8:39723329-39723373                            | NM_145841:1212     | Sgcz       | INSIDE                 | 2.063                                                        | 33.866                         | 2213.30            | 74955.73           | 69.872                         | 1292.88            | 90336.10           |
| A_68_P26996375 | chr10:21713739-21713783                           | NM_011361:-711     | Sgk1       | PROMOTER               | 1.566                                                        | 3.211                          | 605.84             | 1945.46            | 5.029                          | 456.14             | 2293.94            |
| A_68_P27178875 | chr10:60609327-60609371                           | NM_009163:1065     | Sgpl1      | INSIDE                 | 1.598                                                        | 1.769                          | 2592.83            | 4587.47            | 2.828                          | 2049.41            | 5795.72            |
| A_68_P23997432 | chr5:113739494-113739538                          | NM_172718:290      | Sgsm1      | INSIDE                 | 1.661                                                        | 4.145                          | 4114.39            | 17054.40           | 6.886                          | 3205.79            | 22073.60           |
| A_68_P24046730 | chr5:122278610-122278654                          | NM_008507:8178     | Sh2b3      | INSIDE                 | 1.613                                                        | 4.679                          | 832.36             | 3894.34            | 7.546                          | 731.05             | 5516.12            |
| A_68_P23321241 | chr4:133684793-133684837                          | NM_080559:-146     | Sh3bgrl3   | PROMOTER               | 1.695                                                        | 3.600                          | 2045.37            | 7362.38            | 6.101                          | 1544.79            | 9425.19            |
| A_68_P23594805 | chr5:34868409-34868453                            | NM_011893:-2       | Sh3bp2     | PROMOTER               | 2.402                                                        | 20.833                         | 5614.36            | 116962.20          | 50.042                         | 3130.32            | 156648.20          |
| A_68_P23594804 | chr5:34868325-34868369                            | NM_011893:-86      | Sh3bp2     | PROMOTER               | 1.522                                                        | 3.182                          | 1059.93            | 3372.88            | 4.843                          | 1020.92            | 4944.01            |
| A_68_P31253474 | chr17:56175980-56176024                           | NM_013664:-3       | Sh3gl1     | DIVERGENT_PROMOTER     | 2.295                                                        | 5.057                          | 8492.46            | 42943.44           | 11.605                         | 6803.83            | 78960.70           |
| A_68_P23072589 | chr4:84851297-84851341                            | NM_019535:-41      | Sh3gl2     | PROMOTER               | 1.598                                                        | 1.967                          | 485.40             | 954.70             | 3.142                          | 462.98             | 1454.73            |
| A_68_P27165498 | chr10:58275060-58275104                           | NM_172788:-1024    | Sh3rf3     | PROMOTER               | 1.772                                                        | 1.997                          | 6835.60            | 13649.97           | 3.539                          | 5808.04            | 20551.85           |
| A_68_P25086855 | chr7:51591550-51591594                            | NM_00103415:25939  | Shank1     | INSIDE                 | 1.558                                                        | 3.042                          | 2355.54            | 7164.91            | 4.738                          | 1933.02            | 9158.01            |
| A_68_P25086960 | chr7:51607818-51607862                            | NM_00103415:42207  | Shank1     | INSIDE                 | 1.516                                                        | 5.044                          | 7768.35            | 39184.21           | 7.649                          | 5667.39            | 43348.23           |
| A_68_P25086963 | chr7:51608090-51608134                            | NM_00103415:42479  | Shank1     | INSIDE                 | 1.934                                                        | 1.856                          | 483.92             | 897.95             | 3.589                          | 416.06             | 1493.20            |
| A_68_P22883653 | chr4:45543529-45543573                            | NM_001033306:150   | Shb        | INSIDE                 | 1.658                                                        | 3.819                          | 859.99             | 3284.17            | 6.333                          | 816.57             | 5171.07            |
| A_68_P22883647 | chr4:45542639-45542683                            | NM_001033306:1040  | Shb        | INSIDE                 | 1.551                                                        | 3.693                          | 825.96             | 3050.21            | 5.728                          | 737.06             | 4222.19            |
| A_68_P27277985 | chr10:79100697-79100741                           | NM_001024539:-55   | Shc2       | PROMOTER               | 1.790                                                        | 3.240                          | 1741.42            | 5642.11            | 5.799                          | 1450.86            | 8414.19            |
| A_68_P22321899 | chr3:89635034-89635078                            | NM_172530:-235     | She        | PROMOTER               | 2.040                                                        | 5.853                          | 1470.83            | 8608.54            | 11.942                         | 1263.72            | 15091.48           |

| ProbeName      | Target position of probe on CpG island microarray | TargetID           | GeneSymbol | CpG island Description | Ratio of relative methylation (TiO <sub>2</sub> -NP/Vehicle) | Sham group                     |                    |                    | TiO <sub>2</sub> -H group      |                    |                    |
|----------------|---------------------------------------------------|--------------------|------------|------------------------|--------------------------------------------------------------|--------------------------------|--------------------|--------------------|--------------------------------|--------------------|--------------------|
|                |                                                   |                    |            |                        |                                                              | Relative methylation (Cy5/Cy3) | Cy3 signal (Input) | Cy5 signal (MeDIP) | Relative methylation (Cy5/Cy3) | Cy3 signal (Input) | Cy5 signal (MeDIP) |
| A_68_P29639602 | chr14:60244436-60244480                           | NM_145463:341      | Shisa2     | INSIDE                 | 1.576                                                        | 3.893                          | 992.08             | 3861.92            | 6.133                          | 779.98             | 4783.79            |
| A_68_P20638994 | chr1:137271658-137271702                          | NM_175259:-40      | Shisa4     | PROMOTER               | 1.525                                                        | 1.713                          | 767.81             | 1315.14            | 2.612                          | 633.58             | 1654.92            |
| A_68_P24950760 | chr7:4788206-4788250                              | NM_172737:8070     | Shisa7     | INSIDE                 | 1.567                                                        | 4.057                          | 712.16             | 2889.21            | 6.357                          | 591.98             | 3763.03            |
| A_68_P30550104 | chr16:11984103-11984147                           | NM_001174086:-81   | Shisa9     | PROMOTER               | 2.405                                                        | 2.187                          | 9712.97            | 21244.19           | 5.261                          | 6807.54            | 35811.66           |
| A_68_P32185492 | chr19:54018463-54018507                           | NM_001168505:-311  | Shoc2      | PROMOTER               | 1.873                                                        | 3.317                          | 398.42             | 1321.74            | 6.212                          | 340.43             | 2114.92            |
| A_68_P22207824 | chr3:66777458-66777502                            | NM_013665:8213     | Shox2      | INSIDE                 | 1.541                                                        | 1.628                          | 3214.15            | 5233.73            | 2.510                          | 2755.27            | 6914.40            |
| A_68_P32750678 | chrX:149204051-149204095                          | NM_172441:-68      | Shroom2    | PROMOTER               | 1.622                                                        | 2.671                          | 2098.76            | 5606.54            | 4.334                          | 1352.04            | 5859.93            |
| A_68_P23896971 | chr5:93371578-93371622                            | NM_001077596:44577 | Shroom3    | INSIDE                 | 1.638                                                        | 2.786                          | 519.73             | 1447.84            | 4.563                          | 449.18             | 2049.51            |
| A_68_P23896964 | chr5:93370721-93370767                            | NM_001077596:43721 | Shroom3    | INSIDE                 | 1.653                                                        | 2.044                          | 393.57             | 804.42             | 3.378                          | 328.44             | 1109.39            |
| A_68_P32234207 | chrX:5977686-5977730                              | NM_001040459:446   | Shroom4    | INSIDE                 | 1.898                                                        | 3.037                          | 992.20             | 3013.76            | 5.764                          | 637.73             | 3675.91            |
| A_68_P32234202 | chrX:5977172-5977216                              | NM_001040459:-68   | Shroom4    | PROMOTER               | 1.512                                                        | 2.645                          | 1691.44            | 4473.07            | 3.997                          | 1083.40            | 4330.82            |
| A_68_P32796350 | chrX:160514136-160514180                          | NM_009173:-177     | Siah1b     | PROMOTER               | 2.621                                                        | 3.643                          | 1852.28            | 6747.79            | 9.547                          | 1061.03            | 10129.19           |
| A_68_P26477292 | chr9:45821526-45821572                            | NM_027498:646      | Sik3       | INSIDE                 | 1.526                                                        | 3.393                          | 1087.02            | 3688.45            | 5.178                          | 884.56             | 4579.83            |
| A_68_P22383780 | chr3:102799614-102799658                          | NM_025679:-26      | Sike1      | PROMOTER               | 1.796                                                        | 1.652                          | 1622.33            | 2680.09            | 2.967                          | 1345.94            | 3993.37            |
| A_68_P26540094 | chr9:56924177-56924221                            | NM_001110350:16    | Sin3a      | INSIDE                 | 1.510                                                        | 1.692                          | 1975.15            | 3341.37            | 2.555                          | 1590.03            | 4062.80            |
| A_68_P28585119 | chr12:83270170-83270214                           | NM_001167983:-810  | Sipa11     | PROMOTER               | 2.427                                                        | 9.389                          | 1250.51            | 11740.61           | 22.786                         | 826.90             | 18841.71           |
| A_68_P21625558 | chr2:129418959-129419003                          | NM_001177647:50    | Sirpa      | INSIDE                 | 2.259                                                        | 2.888                          | 1133.84            | 3275.07            | 6.526                          | 933.94             | 6095.30            |
| A_68_P28989794 | chr13:43460884-43460928                           | NM_178848:-5178    | Sirt5      | PROMOTER               | 2.332                                                        | 3.269                          | 1508.13            | 4930.73            | 7.626                          | 1101.35            | 8398.55            |
| A_68_P31412114 | chr17:86086928-86086972                           | NM_011380:644      | Six2       | INSIDE                 | 1.817                                                        | 4.305                          | 1547.01            | 6659.82            | 7.824                          | 1263.46            | 9885.38            |
| A_68_P31412120 | chr17:86087935-86087979                           | NM_011380:-362     | Six2       | PROMOTER               | 1.784                                                        | 7.698                          | 5465.70            | 42077.02           | 13.734                         | 4681.46            | 64296.65           |
| A_68_P31412116 | chr17:86087149-86087193                           | NM_011380:424      | Six2       | INSIDE                 | 1.667                                                        | 2.596                          | 711.32             | 1846.23            | 4.328                          | 623.31             | 2697.39            |
| A_68_P31411779 | chr17:86022957-86023001                           | NM_011381:2805     | Six3       | INSIDE                 | 2.050                                                        | 2.885                          | 1519.99            | 4385.06            | 5.913                          | 1232.54            | 7288.03            |
| A_68_P31411712 | chr17:86014601-86014645                           | NR_038085:3114     | Six3os1    | INSIDE                 | 1.984                                                        | 4.684                          | 10986.84           | 51460.60           | 9.291                          | 7340.72            | 68205.52           |
| A_68_P31156111 | chr17:34987166-34987210                           | NM_021337:-39      | Skiv2l     | DIVERGENT_PROMOTER     | 2.007                                                        | 5.126                          | 962.58             | 4934.17            | 10.287                         | 766.37             | 7883.27            |
| A_68_P26574053 | chr9:62986483-62986527                            | NM_172446:8283     | Skor1      | INSIDE                 | 1.844                                                        | 6.491                          | 392.52             | 2547.85            | 11.969                         | 308.45             | 3691.74            |
| A_68_P26574057 | chr9:62986883-62986927                            | NM_172446:7883     | Skor1      | INSIDE                 | 1.735                                                        | 6.931                          | 588.37             | 4077.83            | 12.028                         | 469.55             | 5647.64            |
| A_68_P27798065 | chr11:52045603-52045647                           | NM_011543:128      | Skp1a      | INSIDE                 | 1.531                                                        | 2.037                          | 756.45             | 1540.63            | 3.117                          | 659.84             | 2056.86            |
| A_68_P23590298 | chr5:33995400-33995444                            | NM_009193:-467     | Slbp       | PROMOTER               | 1.836                                                        | 2.597                          | 4361.04            | 11323.66           | 4.766                          | 3399.33            | 16202.53           |
| A_68_P21820794 | chr2:164793741-164793785                          | NM_020333:275      | Slc12a5    | INSIDE                 | 2.299                                                        | 8.368                          | 8253.59            | 69064.27           | 19.241                         | 5190.38            | 99869.07           |
| A_68_P21820992 | chr2:164823190-164823234                          | NM_020333:29725    | Slc12a5    | INSIDE                 | 1.863                                                        | 4.280                          | 1560.22            | 6677.49            | 7.972                          | 1157.02            | 9223.73            |
| A_68_P21820797 | chr2:164794239-164794283                          | NM_020333:773      | Slc12a5    | INSIDE                 | 1.843                                                        | 2.128                          | 874.21             | 1860.62            | 3.922                          | 698.46             | 2739.65            |
| A_68_P21527966 | chr2:112105941-112105985                          | NM_133649:-508     | Slc12a6    | PROMOTER               | 1.715                                                        | 1.556                          | 781.59             | 1216.41            | 2.669                          | 608.90             | 1625.27            |
| A_68_P27228617 | chr10:69707740-69707784                           | NM_025807:-261     | Slc16a9    | PROMOTER               | 1.825                                                        | 3.012                          | 3026.06            | 9114.75            | 5.497                          | 2482.91            | 13648.79           |
| A_68_P27228619 | chr10:69707994-69708038                           | NM_025807:-7       | Slc16a9    | PROMOTER               | 1.620                                                        | 7.744                          | 1500.53            | 11620.31           | 12.543                         | 1322.87            | 16592.67           |
| A_68_P25091507 | chr7:52417775-52417819                            | NM_182993:-1494    | Slc17a7    | PROMOTER               | 1.783                                                        | 4.040                          | 3391.39            | 13699.88           | 7.203                          | 2543.47            | 18320.64           |
| A_68_P27265507 | chr10:76495860-76495904                           | NM_031196:-74      | Slc19a1    | PROMOTER               | 2.499                                                        | 9.071                          | 5096.34            | 46231.10           | 22.666                         | 3101.46            | 70297.76           |
| A_68_P21478262 | chr2:102499332-102499376                          | NM_001077514:515   | Slc1a2     | INSIDE                 | 1.869                                                        | 1.470                          | 1996.54            | 2934.82            | 2.748                          | 1860.15            | 5111.37            |
| A_68_P28938191 | chr13:34436110-34436154                           | NM_001033167:919   | Slc22a23   | INSIDE                 | 1.574                                                        | 3.253                          | 3942.01            | 12824.17           | 5.122                          | 2927.73            | 14995.06           |
| A_68_P28938196 | chr13:34436655-34436699                           | NM_001033167:375   | Slc22a23   | INSIDE                 | 1.520                                                        | 1.966                          | 319.47             | 628.20             | 2.988                          | 317.30             | 948.12             |
| A_68_P27901829 | chr11:70460462-70460506                           | NM_024211:11       | Slc25a11   | INSIDE                 | 2.215                                                        | 1.633                          | 1156.52            | 1888.88            | 3.617                          | 951.49             | 3441.89            |
| A_68_P32127978 | chr19:43749225-43749269                           | NM_145156:125      | Slc25a28   | INSIDE                 | 1.860                                                        | 3.834                          | 4546.31            | 17431.31           | 7.130                          | 3722.09            | 26537.24           |
| A_68_P27340135 | chr10:90586440-90586484                           | NM_133668:246      | Slc25a3    | INSIDE                 | 2.048                                                        | 3.639                          | 885.81             | 3223.11            | 7.451                          | 782.32             | 5828.85            |
| A_68_P23402414 | chr4:149148446-149148491                          | NM_027460:-92      | Slc25a33   | PROMOTER               | 1.732                                                        | 6.311                          | 5319.73            | 33572.15           | 10.928                         | 4115.00            | 44966.77           |
| A_68_P31598791 | chr18:31769247-31769291                           | NM_026165:288      | Slc25a46   | INSIDE                 | 1.552                                                        | 3.700                          | 928.88             | 3437.12            | 5.743                          | 845.62             | 4856.30            |
| A_68_P28177386 | chr11:119217235-119217283                         | NM_178743:388      | Slc26a11   | INSIDE                 | 1.744                                                        | 3.869                          | 1785.95            | 6909.52            | 6.749                          | 1449.59            | 9782.59            |
| A_68_P28332010 | chr12:32244021-32244065                           | NM_011867:792      | Slc26a4    | INSIDE                 | 1.552                                                        | 2.591                          | 663.55             | 1719.32            | 4.020                          | 565.21             | 2272.30            |
| A_68_P25957541 | chr8:74093810-74093856                            | NM_011977:1007     | Slc27a1    | INSIDE                 | 1.677                                                        | 1.544                          | 2369.95            | 3658.60            | 2.589                          | 1777.86            | 4603.28            |

| ProbeName      | Target position of probe on CpG island microarray | TargetID          | GeneSymbol | CpG island Description | Ratio of relative methylation (TiO <sub>2</sub> -NP/Vehicle) | Sham group                     |                    |                    | TiO <sub>2</sub> -H group      |                    |                    |
|----------------|---------------------------------------------------|-------------------|------------|------------------------|--------------------------------------------------------------|--------------------------------|--------------------|--------------------|--------------------------------|--------------------|--------------------|
|                |                                                   |                   |            |                        |                                                              | Relative methylation (Cy5/Cy3) | Cy3 signal (Input) | Cy5 signal (MeDIP) | Relative methylation (Cy5/Cy3) | Cy3 signal (Input) | Cy5 signal (MeDIP) |
| A_68_P30436287 | chr15:91403612-91403656                           | NM_001033633:58   | Slc2a13    | INSIDE                 | 2.026                                                        | 8.109                          | 4830.94            | 39175.08           | 16.427                         | 3504.49            | 57568.49           |
| A_68_P30436282 | chr15:91402943-91402987                           | NM_001033633:728  | Slc2a13    | INSIDE                 | 1.767                                                        | 3.345                          | 1912.48            | 6397.63            | 5.912                          | 1714.23            | 10134.76           |
| A_68_P30436288 | chr15:91403683-91403727                           | NM_001033633:-12  | Slc2a13    | PROMOTER               | 1.642                                                        | 1.669                          | 457.19             | 762.82             | 2.740                          | 420.44             | 1152.03            |
| A_68_P23576447 | chr5:31395717-31395761                            | NM_011773:162     | Slc30a3    | INSIDE                 | 1.669                                                        | 3.772                          | 1644.43            | 6202.22            | 6.295                          | 1250.89            | 7873.75            |
| A_68_P21587592 | chr2:122528587-122528631                          | NM_011774:-209    | Slc30a4    | PROMOTER               | 2.167                                                        | 4.479                          | 2103.53            | 9422.12            | 9.705                          | 1687.24            | 16374.21           |
| A_68_P29270336 | chr13:101602642-101602692                         | NM_022885:716     | Slc30a5    | INSIDE                 | 2.064                                                        | 4.883                          | 1259.48            | 6149.51            | 10.078                         | 939.30             | 9466.16            |
| A_68_P22963537 | chr4:61947638-61947682                            | NM_025286:182     | Slc31a2    | INSIDE                 | 1.575                                                        | 2.257                          | 4243.51            | 9576.03            | 3.553                          | 3512.67            | 12481.00           |
| A_68_P21783928 | chr2:158436941-158436985                          | NM_009508:469     | Slc32a1    | INSIDE                 | 1.973                                                        | 5.667                          | 21029.26           | 119167.00          | 11.180                         | 15800.81           | 176658.30          |
| A_68_P28963697 | chr13:39052368-39052412                           | NM_001170430:16   | Slc35b3    | INSIDE                 | 1.563                                                        | 1.824                          | 2096.03            | 3823.89            | 2.851                          | 1602.74            | 4569.52            |
| A_68_P26983377 | chr10:19570989-19571033                           | NM_029529:255     | Slc35d3    | INSIDE                 | 1.762                                                        | 1.437                          | 1770.66            | 2545.16            | 2.533                          | 1354.11            | 3430.35            |
| A_68_P23439553 | chr4:154976002-154976046                          | NM_177186:500     | Slc35e2    | INSIDE                 | 1.540                                                        | 2.236                          | 771.25             | 1724.72            | 3.443                          | 614.18             | 2114.67            |
| A_68_P27138494 | chr10:52410512-52410556                           | NM_178675:228     | Slc35f1    | INSIDE                 | 2.495                                                        | 3.924                          | 618.16             | 2425.63            | 9.792                          | 614.22             | 6014.29            |
| A_68_P20585375 | chr1:127456906-127456950                          | NM_028787:-664    | Slc35f5    | PROMOTER               | 2.071                                                        | 5.325                          | 2201.21            | 11722.48           | 11.029                         | 1528.85            | 16862.37           |
| A_68_P20585382 | chr1:127457522-127457566                          | NM_028787:-48     | Slc35f5    | PROMOTER               | 1.587                                                        | 3.073                          | 987.60             | 3034.69            | 4.876                          | 876.38             | 4272.84            |
| A_68_P21420493 | chr2:90910689-90910733                            | NM_026721:-332    | Slc39a13   | PROMOTER               | 1.802                                                        | 3.480                          | 3319.90            | 11553.43           | 6.269                          | 2783.38            | 17450.22           |
| A_68_P21420490 | chr2:90910289-90910333                            | NM_026721:68      | Slc39a13   | INSIDE                 | 1.576                                                        | 1.606                          | 2381.15            | 3824.63            | 2.532                          | 1770.20            | 4482.07            |
| A_68_P31560905 | chr18:24761962-24762006                           | NM_139143:334     | Slc39a6    | INSIDE                 | 1.868                                                        | 2.161                          | 1272.21            | 2749.55            | 4.037                          | 1035.29            | 4179.32            |
| A_68_P31560903 | chr18:24761642-24761686                           | NM_139143:654     | Slc39a6    | INSIDE                 | 1.834                                                        | 2.435                          | 2444.17            | 5951.24            | 4.466                          | 2013.51            | 8992.61            |
| A_68_P31943158 | chr19:8788397-8788441                             | NM_008577:-31     | Slc3a2     | PROMOTER               | 1.514                                                        | 3.055                          | 1784.84            | 5452.80            | 4.624                          | 1356.57            | 6272.64            |
| A_68_P22923084 | chr4:53453754-53453798                            | NM_001159633:492  | Slc44a1    | INSIDE                 | 1.758                                                        | 4.226                          | 3284.90            | 13883.52           | 7.429                          | 2686.04            | 19955.22           |
| A_68_P23407530 | chr4:150026271-150026315                          | NM_173774:-9      | Slc45a1    | PROMOTER               | 1.691                                                        | 6.326                          | 669.12             | 4233.06            | 10.699                         | 664.88             | 7113.70            |
| A_68_P27943494 | chr11:78279579-78279623                           | NM_026740:398     | Slc46a1    | INSIDE                 | 2.212                                                        | 5.310                          | 7800.47            | 41419.02           | 11.745                         | 5159.24            | 60594.41           |
| A_68_P21631241 | chr2:130523070-130523114                          | NM_001081162:163  | Slc4a11    | INSIDE                 | 1.784                                                        | 2.805                          | 856.46             | 2402.29            | 5.003                          | 680.46             | 3404.16            |
| A_68_P20354818 | chr1:75543316-75543360                            | NM_009208:498     | Slc4a3     | INSIDE                 | 2.116                                                        | 4.675                          | 6516.45            | 30464.92           | 9.891                          | 4369.35            | 43216.35           |
| A_68_P27327917 | chr10:88348711-88348755                           | NM_145423:-4      | Slc5a8     | PROMOTER               | 1.759                                                        | 5.743                          | 1545.80            | 8878.18            | 10.104                         | 1367.68            | 13818.54           |
| A_68_P24764862 | chr6:114232614-114232658                          | NM_178703:8       | Slc6a1     | INSIDE                 | 2.549                                                        | 17.190                         | 6602.31            | 113494.20          | 43.825                         | 3404.89            | 149218.90          |
| A_68_P24764867 | chr6:114233070-114233114                          | NM_178703:464     | Slc6a1     | INSIDE                 | 1.815                                                        | 2.185                          | 1964.99            | 4292.57            | 3.964                          | 1703.19            | 6751.78            |
| A_68_P26068970 | chr8:95484812-95484856                            | NM_009209:-111    | Slc6a2     | PROMOTER               | 2.056                                                        | 2.600                          | 328.68             | 854.73             | 5.348                          | 259.54             | 1387.98            |
| A_68_P27935204 | chr11:76811878-76811922                           | NM_010484:-198    | Slc6a4     | PROMOTER               | 1.732                                                        | 2.191                          | 1262.92            | 2767.27            | 3.795                          | 1066.19            | 4046.40            |
| A_68_P32464061 | chrX:70918592-70918636                            | NM_001142809:143  | Slc6a8     | INSIDE                 | 1.948                                                        | 4.473                          | 1953.12            | 8735.75            | 8.713                          | 1190.32            | 10371.57           |
| A_68_P23236664 | chr4:117508530-117508574                          | NM_008135:690     | Slc6a9     | INSIDE                 | 1.748                                                        | 2.240                          | 1988.17            | 4452.72            | 3.914                          | 1745.17            | 6830.68            |
| A_68_P23236670 | chr4:117509289-117509333                          | NM_008135:1448    | Slc6a9     | INSIDE                 | 1.719                                                        | 3.621                          | 3065.86            | 11101.40           | 6.224                          | 2295.46            | 14288.00           |
| A_68_P25807719 | chr8:41947388-41947432                            | NM_007514:-310    | Slc7a2     | PROMOTER               | 1.982                                                        | 6.030                          | 7612.40            | 45905.08           | 11.954                         | 5257.46            | 62847.22           |
| A_68_P30574556 | chr16:17576756-17576800                           | NM_144852:-14     | Slc7a4     | PROMOTER               | 1.675                                                        | 2.076                          | 1704.75            | 3539.73            | 3.478                          | 1349.50            | 4693.46            |
| A_68_P26229674 | chr8:124431610-124431654                          | NM_011404:-46     | Slc7a5     | DIVERGENT_PROMOTER     | 1.515                                                        | 2.080                          | 3412.27            | 7097.53            | 3.152                          | 2669.32            | 8414.32            |
| A_68_P26138122 | chr8:108692733-108692777                          | NM_178798:-20     | Slc7a6     | PROMOTER               | 2.133                                                        | 9.459                          | 3267.93            | 30911.10           | 20.172                         | 2009.26            | 40530.44           |
| A_68_P26138372 | chr8:108734689-108734733                          | NM_001007567:123  | Slc7a6os   | INSIDE                 | 1.521                                                        | 2.938                          | 1210.21            | 3555.44            | 4.469                          | 1091.81            | 4879.33            |
| A_68_P32396713 | chrX:53862851-53862895                            | NM_172780:-139    | Slc9a6     | PROMOTER               | 2.649                                                        | 5.416                          | 1489.93            | 8069.17            | 14.349                         | 796.83             | 11433.70           |
| A_68_P22236489 | chr3:72861536-72861580                            | NM_198864:-693    | Slitrk3    | PROMOTER               | 1.653                                                        | 2.647                          | 8475.59            | 22433.80           | 4.376                          | 6429.11            | 28135.05           |
| A_68_P22236487 | chr3:72861315-72861359                            | NM_198864:-471    | Slitrk3    | PROMOTER               | 1.556                                                        | 1.938                          | 2102.13            | 4073.97            | 3.015                          | 1678.91            | 5062.21            |
| A_68_P32150744 | chr19:47653811-47653855                           | NM_001164639:-676 | Slk        | PROMOTER               | 1.806                                                        | 1.474                          | 1101.74            | 1624.42            | 2.663                          | 969.80             | 2583.01            |
| A_68_P31791990 | chr18:67624448-67624492                           | NM_144867:-32     | Slmo1      | PROMOTER               | 1.776                                                        | 1.828                          | 573.52             | 1048.66            | 3.248                          | 617.54             | 2005.65            |
| A_68_P25994476 | chr8:81922795-81922839                            | NM_008539:551     | Smad1      | INSIDE                 | 1.795                                                        | 10.589                         | 3319.82            | 35154.77           | 19.006                         | 2493.42            | 47388.88           |
| A_68_P29062977 | chr13:56805003-56805048                           | NM_001164042:-3   | Smad5      | PROMOTER               | 1.663                                                        | 6.202                          | 2821.79            | 17499.50           | 10.311                         | 2385.19            | 24592.75           |
| A_68_P26579683 | chr9:63870481-63870525                            | NM_008542:-636    | Smad6      | PROMOTER               | 1.662                                                        | 2.949                          | 2979.18            | 8784.45            | 4.901                          | 2298.79            | 11266.06           |
| A_68_P30486834 | chr15:100467426-100467470                         | NM_001033872:-152 | Smagp      | PROMOTER               | 1.684                                                        | 1.671                          | 1685.07            | 2816.45            | 2.815                          | 1373.73            | 3866.96            |
| A_68_P23254538 | chr4:120690017-120690061                          | NM_133716:-186    | Smap2      | PROMOTER               | 1.714                                                        | 4.098                          | 636.02             | 2606.32            | 7.024                          | 524.34             | 3683.03            |

| ProbeName      | Target position of probe on CpG island microarray | TargetID           | GeneSymbol | CpG island Description | Ratio of relative methylation (TiO <sub>2</sub> -NP/Vehicle) | Sham group                     |                    |                    | TiO <sub>2</sub> -H group      |                    |                    |
|----------------|---------------------------------------------------|--------------------|------------|------------------------|--------------------------------------------------------------|--------------------------------|--------------------|--------------------|--------------------------------|--------------------|--------------------|
|                |                                                   |                    |            |                        |                                                              | Relative methylation (Cy5/Cy3) | Cy3 signal (Input) | Cy5 signal (MeDIP) | Relative methylation (Cy5/Cy3) | Cy3 signal (Input) | Cy5 signal (MeDIP) |
| A_68_P32036088 | chr19:26681356-26681400                           | NM_011416:1729     | Smarca2    | INSIDE                 | 1.581                                                        | 3.893                          | 616.82             | 2401.14            | 6.156                          | 548.04             | 3373.76            |
| A_68_P32036079 | chr19:26680265-26680310                           | NM_011416:638      | Smarca2    | INSIDE                 | 1.551                                                        | 1.658                          | 1913.20            | 3172.21            | 2.571                          | 1502.58            | 3863.03            |
| A_68_P26822089 | chr9:110034498-110034542                          | NM_009211:-7       | Smarca1    | PROMOTER               | 1.586                                                        | 6.946                          | 17001.44           | 118093.90          | 11.014                         | 16425.11           | 180909.50          |
| A_68_P23542998 | chr5:24110558-24110602                            | NM_025891:-2760    | Smarca3    | PROMOTER               | 1.631                                                        | 8.477                          | 7541.98            | 63933.24           | 13.824                         | 5614.49            | 77617.03           |
| A_68_P28061204 | chr11:99091669-99091713                           | NM_020618:641      | Smarca1    | INSIDE                 | 1.700                                                        | 1.808                          | 1456.70            | 2633.66            | 3.073                          | 1302.10            | 4000.92            |
| A_68_P28237421 | chr12:11273151-11273195                           | NM_025695:481      | Smc6       | INSIDE                 | 1.577                                                        | 2.663                          | 948.41             | 2526.00            | 4.199                          | 774.69             | 3253.12            |
| A_68_P28685879 | chr12:102321594-102321638                         | NM_001160214:296   | Smek1      | INSIDE                 | 1.596                                                        | 2.273                          | 1733.74            | 3940.91            | 3.627                          | 1557.98            | 5650.62            |
| A_68_P25457391 | chr7:125387085-125387129                          | NM_001031814:45    | Smg1       | INSIDE                 | 2.106                                                        | 4.551                          | 16026.86           | 72944.30           | 9.587                          | 11915.57           | 114231.50          |
| A_68_P24328142 | chr6:29685305-29685349                            | NM_176996:-170     | Smo        | PROMOTER               | 2.031                                                        | 6.080                          | 4339.25            | 26382.27           | 12.347                         | 3096.61            | 38233.21           |
| A_68_P24328146 | chr6:29685667-29685711                            | NM_176996:192      | Smo        | INSIDE                 | 1.511                                                        | 4.847                          | 1094.66            | 5305.59            | 7.325                          | 874.54             | 6405.71            |
| A_68_P21635209 | chr2:131317684-131317728                          | NM_001177833:109   | SmoX       | INSIDE                 | 1.607                                                        | 7.670                          | 1752.26            | 13439.82           | 12.323                         | 1384.68            | 17062.93           |
| A_68_P30574719 | chr16:17619415-17619459                           | NM_001164609:-10   | Smpd4      | PROMOTER               | 1.740                                                        | 3.457                          | 1114.97            | 3854.16            | 6.013                          | 928.41             | 5582.68            |
| A_68_P32766765 | chrX:153929388-153929432                          | NM_009214:568      | Sms        | INSIDE                 | 2.423                                                        | 5.494                          | 1673.83            | 9195.71            | 13.311                         | 1054.97            | 14042.84           |
| A_68_P32766764 | chrX:153929309-153929353                          | NM_009214:648      | Sms        | INSIDE                 | 1.997                                                        | 4.112                          | 1440.88            | 5924.68            | 8.211                          | 837.57             | 6877.17            |
| A_68_P32766772 | chrX:153930279-153930323                          | NM_009214:-322     | Sms        | PROMOTER               | 1.698                                                        | 4.058                          | 1323.76            | 5372.22            | 6.890                          | 777.52             | 5357.23            |
| A_68_P20929010 | chr1:191746024-191746068                          | NM_026796:121      | Smyd2      | INSIDE                 | 1.856                                                        | 1.637                          | 1106.26            | 1810.60            | 3.039                          | 961.74             | 2922.27            |
| A_68_P27925675 | chr11:75162047-75162091                           | NM_001102611:134   | Smyd4      | INSIDE                 | 1.621                                                        | 1.499                          | 641.77             | 962.31             | 2.431                          | 578.57             | 1406.70            |
| A_68_P21836025 | chr2:167363730-167363774                          | NM_011427:26       | Snai1      | INSIDE                 | 1.711                                                        | 1.602                          | 1591.40            | 2549.53            | 2.740                          | 1316.52            | 3607.71            |
| A_68_P21078285 | chr2:26236006-26236050                            | NM_172339:145      | Snape4     | INSIDE                 | 1.709                                                        | 3.792                          | 4307.71            | 16333.25           | 6.478                          | 3441.90            | 22297.41           |
| A_68_P29051301 | chr13:54867120-54867164                           | NM_033610:659      | Sncb       | INSIDE                 | 1.752                                                        | 3.620                          | 2927.26            | 10596.65           | 6.343                          | 2313.86            | 14677.38           |
| A_68_P30546005 | chr16:11066391-11066435                           | NM_009223:22       | Snn        | INSIDE                 | 1.563                                                        | 1.775                          | 1499.49            | 2661.18            | 2.774                          | 1273.43            | 3531.86            |
| A_68_P25588870 | chr7:148633634-148633678                          | NR_034049:-1075    | Snora52    | PROMOTER               | 1.789                                                        | 2.259                          | 6061.79            | 13694.99           | 4.041                          | 4450.07            | 17984.60           |
| A_68_P25954806 | chr8:73421106-73421150                            | NR_002901:-1373    | Snora68    | PROMOTER               | 1.562                                                        | 1.778                          | 2759.35            | 4907.28            | 2.777                          | 2115.56            | 5875.71            |
| A_68_P23232782 | chr4:116828713-116828757                          | NR_030704:-281     | Snord55    | PROMOTER               | 2.140                                                        | 3.084                          | 637.06             | 1964.47            | 6.599                          | 492.18             | 3247.96            |
| A_68_P20411724 | chr1:88255322-88255366                            | NR_002851:-2442    | Snord82    | PROMOTER               | 1.827                                                        | 5.464                          | 1772.42            | 9685.24            | 9.982                          | 1286.89            | 12845.70           |
| A_68_P21745020 | chr2:151457975-151458019                          | NM_198214:273      | Snph       | INSIDE                 | 1.503                                                        | 4.184                          | 431.24             | 1804.12            | 6.287                          | 374.44             | 2354.14            |
| A_68_P26887498 | chr9:122026335-122026379                          | NM_001164572:-27   | Snrk       | PROMOTER               | 1.574                                                        | 3.457                          | 2955.78            | 10218.80           | 5.442                          | 2375.99            | 12929.20           |
| A_68_P31118768 | chr17:27977231-27977275                           | NM_011432:221      | Snrpc      | INSIDE                 | 1.763                                                        | 5.799                          | 496.83             | 2881.28            | 10.226                         | 367.40             | 3757.01            |
| A_68_P20022045 | chr1:9289343-9289387                              | NM_027671:447      | Sntg1      | INSIDE                 | 1.752                                                        | 5.857                          | 3617.91            | 21188.75           | 10.260                         | 2628.46            | 26966.77           |
| A_68_P26591323 | chr9:65972506-65972550                            | NM_019727:165      | Snx1       | INSIDE                 | 1.782                                                        | 2.993                          | 1149.29            | 3439.90            | 5.332                          | 971.18             | 5178.63            |
| A_68_P24445013 | chr6:51542631-51542675                            | NM_001127348:48131 | Snx10      | DOWNSTREAM             | 1.513                                                        | 1.619                          | 5835.38            | 9446.43            | 2.449                          | 4234.39            | 10370.79           |
| A_68_P28351016 | chr12:35731926-35731970                           | NM_001014973:88    | Snx13      | INSIDE                 | 1.793                                                        | 5.061                          | 1661.88            | 8411.34            | 9.077                          | 1424.16            | 12927.00           |
| A_68_P26394905 | chr9:30234659-30234703                            | NM_028874:-233     | Snx19      | PROMOTER               | 1.657                                                        | 1.766                          | 790.61             | 1396.01            | 2.926                          | 755.39             | 2210.60            |
| A_68_P26591015 | chr9:65917041-65917085                            | NM_001025612:476   | Snx22      | INSIDE                 | 1.933                                                        | 3.673                          | 1247.31            | 4581.80            | 7.101                          | 1043.81            | 7412.32            |
| A_68_P27095209 | chr10:42222002-42222046                           | NM_017472:165      | Snx3       | INSIDE                 | 2.314                                                        | 4.285                          | 1119.07            | 4795.47            | 9.918                          | 862.62             | 8555.08            |
| A_68_P30656969 | chr16:33251415-33251459                           | NM_080557:-105     | Snx4       | PROMOTER               | 2.486                                                        | 10.407                         | 3440.30            | 35804.83           | 25.873                         | 2337.93            | 60489.97           |
| A_68_P28449264 | chr12:55896516-55896560                           | NM_026998:111      | Snx6       | INSIDE                 | 1.818                                                        | 4.739                          | 1566.84            | 7425.23            | 8.616                          | 1292.67            | 11137.82           |
| A_68_P24141205 | chr5:140865282-140865326                          | NM_172277:-103     | Snx8       | PROMOTER               | 2.512                                                        | 5.782                          | 13712.53           | 79285.45           | 14.522                         | 8932.21            | 129716.30          |
| A_68_P30544459 | chr16:10785615-10785659                           | NM_009896:-7       | Socs1      | PROMOTER               | 1.940                                                        | 4.714                          | 4002.87            | 18868.14           | 9.143                          | 3241.30            | 29633.88           |
| A_68_P27365029 | chr10:94878409-94878453                           | NM_001168656:-312  | Socs2      | PROMOTER               | 1.957                                                        | 3.650                          | 1261.25            | 4603.74            | 7.144                          | 1029.49            | 7354.78            |
| A_68_P31054932 | chr17:13200778-13200822                           | NM_013671:96       | Sod2       | INSIDE                 | 1.676                                                        | 3.293                          | 1214.17            | 3997.88            | 5.520                          | 988.75             | 5457.47            |
| A_68_P23694283 | chr5:52759912-52759956                            | NM_011435:4892     | Sod3       | INSIDE                 | 1.595                                                        | 4.202                          | 2347.88            | 9864.82            | 6.699                          | 1963.26            | 13152.84           |
| A_68_P29699987 | chr14:70606016-70606060                           | NM_011366:1406     | Sorbs3     | INSIDE                 | 1.837                                                        | 4.285                          | 2648.09            | 11346.76           | 7.872                          | 2086.17            | 16422.34           |
| A_68_P32168785 | chr19:50752526-50752570                           | NM_021377:554      | Sorcs1     | INSIDE                 | 2.133                                                        | 7.067                          | 4953.93            | 35007.53           | 15.071                         | 3490.88            | 52610.12           |
| A_68_P32168791 | chr19:50753028-50753072                           | NM_021377:52       | Sorcs1     | INSIDE                 | 1.765                                                        | 5.090                          | 1771.47            | 9017.51            | 8.987                          | 1696.90            | 15249.77           |
| A_68_P23607369 | chr5:36740782-36740826                            | NM_030889:-16      | Sorcs2     | PROMOTER               | 1.758                                                        | 6.372                          | 4995.22            | 31827.52           | 11.198                         | 4038.19            | 45221.17           |
| A_68_P22411695 | chr3:108086638-108086682                          | NM_019972:-389     | Sort1      | PROMOTER               | 1.860                                                        | 12.153                         | 4225.97            | 51358.98           | 22.603                         | 3331.36            | 75298.24           |

| ProbeName      | Target position of probe on CpG island microarray | TargetID           | GeneSymbol | CpG island Description | Ratio of relative methylation (TiO <sub>2</sub> -NP/Vehicle) | Sham group                     |                    |                    | TiO <sub>2</sub> -H group      |                    |                    |
|----------------|---------------------------------------------------|--------------------|------------|------------------------|--------------------------------------------------------------|--------------------------------|--------------------|--------------------|--------------------------------|--------------------|--------------------|
|                |                                                   |                    |            |                        |                                                              | Relative methylation (Cy5/Cy3) | Cy3 signal (Input) | Cy5 signal (MeDIP) | Relative methylation (Cy5/Cy3) | Cy3 signal (Input) | Cy5 signal (MeDIP) |
| A_68_P28515845 | chr12:70782400-70782444                           | NM_001135559:417   | Sos2       | INSIDE                 | 1.969                                                        | 2.541                          | 1958.50            | 4975.69            | 5.001                          | 1528.15            | 7642.91            |
| A_68_P28307263 | chr12:28027320-28027364                           | NM_009234:241      | Sox11      | INSIDE                 | 2.795                                                        | 16.492                         | 4774.96            | 78748.73           | 46.092                         | 3149.38            | 145159.90          |
| A_68_P28307270 | chr12:28028339-28028383                           | NM_009234:-777     | Sox11      | PROMOTER               | 1.666                                                        | 2.492                          | 5072.19            | 12642.29           | 4.152                          | 3722.72            | 15456.05           |
| A_68_P26766653 | chr9:99775810-99775854                            | NM_011440:757      | Sox14      | INSIDE                 | 1.624                                                        | 2.131                          | 357.97             | 762.89             | 3.461                          | 336.16             | 1163.37            |
| A_68_P20005810 | chr1:4483711-4483755                              | NM_011441:2762     | Sox17      | INSIDE                 | 1.927                                                        | 4.121                          | 693.64             | 2858.49            | 7.941                          | 700.21             | 5560.40            |
| A_68_P20005794 | chr1:4482093-4482137                              | NM_011441:4380     | Sox17      | INSIDE                 | 1.589                                                        | 1.584                          | 758.20             | 1201.34            | 2.517                          | 626.08             | 1575.97            |
| A_68_P29937469 | chr14:118633887-118633936                         | NM_177753:2341     | Sox21      | INSIDE                 | 1.566                                                        | 2.106                          | 666.97             | 1404.33            | 3.298                          | 548.73             | 1809.84            |
| A_68_P28909030 | chr13:29051600-29051644                           | NM_009238:-6071    | Sox4       | PROMOTER               | 2.248                                                        | 3.638                          | 3625.39            | 13187.66           | 8.177                          | 2539.05            | 20760.84           |
| A_68_P25445817 | chr7:123177303-123177347                          | NM_001025560:-2763 | Sox6       | PROMOTER               | 1.917                                                        | 3.509                          | 3173.69            | 11135.04           | 6.726                          | 2390.20            | 16075.83           |
| A_68_P29664626 | chr14:64562881-64562925                           | NM_011446:360      | Sox7       | INSIDE                 | 1.647                                                        | 2.929                          | 1685.38            | 4936.40            | 4.824                          | 1370.78            | 6612.59            |
| A_68_P31104792 | chr17:25707704-25707748                           | NM_011447:-95      | Sox8       | DIVERGENT_PROMOTER     | 1.535                                                        | 5.972                          | 1910.27            | 11407.68           | 9.169                          | 1274.07            | 11682.41           |
| A_68_P28137828 | chr11:112643707-112643751                         | NM_011448:205      | Sox9       | INSIDE                 | 1.701                                                        | 3.547                          | 3362.01            | 11926.44           | 6.035                          | 2633.99            | 15895.53           |
| A_68_P28137825 | chr11:112643344-112643388                         | NM_011448:-157     | Sox9       | PROMOTER               | 1.664                                                        | 1.701                          | 4828.16            | 8213.36            | 2.830                          | 3355.10            | 9494.71            |
| A_68_P30497696 | chr15:102236237-102236289                         | NM_013672:-484     | Sp1        | PROMOTER               | 1.690                                                        | 2.365                          | 620.64             | 1467.90            | 3.996                          | 432.04             | 1726.52            |
| A_68_P30497699 | chr15:102236639-102236683                         | NM_013672:-86      | Sp1        | PROMOTER               | 1.634                                                        | 2.607                          | 1459.41            | 3804.34            | 4.259                          | 1211.32            | 5158.72            |
| A_68_P28778754 | chr12:119539626-119539670                         | NM_001166385:265   | Sp4        | INSIDE                 | 1.862                                                        | 2.643                          | 5538.52            | 14636.78           | 4.922                          | 3708.25            | 18250.32           |
| A_68_P28048173 | chr11:96879906-96879950                           | NM_031183:5046     | Sp6        | INSIDE                 | 2.171                                                        | 8.587                          | 6504.89            | 55854.27           | 18.644                         | 4870.51            | 90804.01           |
| A_68_P28781893 | chr12:120087514-120087558                         | NM_177082:2735     | Sp8        | INSIDE                 | 1.855                                                        | 6.228                          | 2260.85            | 14079.59           | 11.549                         | 1813.01            | 20938.56           |
| A_68_P28781792 | chr12:120075230-120075274                         | NM_177082:-9549    | Sp8        | PROMOTER               | 1.718                                                        | 2.608                          | 3721.05            | 9704.84            | 4.481                          | 2814.29            | 12609.79           |
| A_68_P21330556 | chr2:73115402-73115446                            | NM_001005343:5442  | Sp9        | DOWNSTREAM             | 1.969                                                        | 4.836                          | 4620.55            | 22345.30           | 9.521                          | 3436.51            | 32718.53           |
| A_68_P27942521 | chr11:78115275-78115319                           | NM_017407:204      | Spag5      | INSIDE                 | 1.642                                                        | 5.783                          | 1791.57            | 10361.45           | 9.494                          | 1481.68            | 14067.16           |
| A_68_P31351023 | chr17:74738587-74738631                           | NM_001162870:282   | Spast      | INSIDE                 | 1.515                                                        | 3.242                          | 614.24             | 1991.24            | 4.912                          | 530.71             | 2606.66            |
| A_68_P22614971 | chr3:146162605-146162649                          | NM_027617:91       | Spata1     | INSIDE                 | 1.599                                                        | 3.443                          | 830.28             | 2858.85            | 5.504                          | 725.21             | 3991.58            |
| A_68_P22063513 | chr3:37319180-37319224                            | NM_001163511:1     | Spata5     | INSIDE                 | 1.686                                                        | 1.914                          | 702.42             | 1344.19            | 3.226                          | 643.62             | 2076.33            |
| A_68_P21307670 | chr2:69044152-69044196                            | NM_001199123:73    | Spc25      | INSIDE                 | 1.852                                                        | 3.706                          | 1585.79            | 5877.44            | 6.865                          | 1353.50            | 9291.82            |
| A_68_P21633642 | chr2:130997305-130997349                          | NM_027641:3220     | Spef1      | INSIDE                 | 1.534                                                        | 2.060                          | 1345.19            | 2770.51            | 3.159                          | 1104.99            | 3490.29            |
| A_68_P26587800 | chr9:65308975-65309019                            | NM_138584:253      | Spg21      | INSIDE                 | 1.582                                                        | 4.852                          | 7065.33            | 34279.80           | 7.673                          | 4943.68            | 37934.16           |
| A_68_P21568536 | chr2:119063328-119063372                          | NM_016907:255      | Spint1     | INSIDE                 | 1.718                                                        | 2.031                          | 3187.21            | 6473.42            | 3.490                          | 2311.72            | 8067.09            |
| A_68_P21100500 | chr2:29821292-29821336                            | NM_001076554:235   | Spna2      | INSIDE                 | 2.415                                                        | 5.503                          | 3190.19            | 17554.30           | 13.290                         | 2465.20            | 32762.30           |
| A_68_P21100497 | chr2:29820983-29821027                            | NM_001076554:-75   | Spna2      | PROMOTER               | 1.655                                                        | 1.873                          | 8262.90            | 15476.18           | 3.100                          | 6187.29            | 19181.71           |
| A_68_P21100496 | chr2:29820843-29820887                            | NM_001076554:-215  | Spna2      | PROMOTER               | 1.585                                                        | 2.106                          | 2808.10            | 5914.80            | 3.338                          | 2344.22            | 7824.94            |
| A_68_P25017170 | chr7:28193438-28193482                            | NM_032610:38148    | Spnb4      | INSIDE                 | 1.837                                                        | 3.254                          | 1617.69            | 5263.61            | 5.977                          | 1239.79            | 7410.37            |
| A_68_P25017009 | chr7:28160497-28160541                            | NM_001199235:19007 | Spnb4      | INSIDE                 | 1.642                                                        | 2.209                          | 3530.92            | 7801.52            | 3.628                          | 3013.58            | 10934.32           |
| A_68_P21556049 | chr2:116946411-116946455                          | NM_033524:-753     | Spred1     | PROMOTER               | 2.559                                                        | 7.004                          | 7406.18            | 51873.25           | 17.920                         | 5638.84            | 101048.30          |
| A_68_P21556050 | chr2:116946481-116946525                          | NM_033524:-683     | Spred1     | PROMOTER               | 1.842                                                        | 3.294                          | 4864.40            | 16025.06           | 6.069                          | 4099.83            | 24880.16           |
| A_68_P27628926 | chr11:19825568-19825612                           | NM_033523:1146     | Spred2     | INSIDE                 | 1.848                                                        | 5.940                          | 1757.69            | 10440.87           | 10.975                         | 1358.52            | 14909.89           |
| A_68_P27629548 | chr11:19921114-19921161                           | NM_033523:96693    | Spred2     | INSIDE                 | 1.678                                                        | 2.842                          | 623.29             | 1771.16            | 4.768                          | 471.80             | 2249.64            |
| A_68_P30496205 | chr15:101966489-101966533                         | NM_001033277:136   | Spryd3     | INSIDE                 | 1.745                                                        | 2.590                          | 3279.72            | 8492.93            | 4.519                          | 2677.66            | 12099.03           |
| A_68_P28615786 | chr12:88729140-88729184                           | NM_011479:18       | Sptlc2     | INSIDE                 | 1.965                                                        | 7.386                          | 683.93             | 5051.85            | 14.516                         | 646.96             | 9391.54            |
| A_68_P28615267 | chr12:88640639-88640683                           | NM_011479:88520    | Sptlc2     | DOWNSTREAM             | 1.638                                                        | 3.014                          | 654.26             | 1971.91            | 4.938                          | 576.68             | 2847.47            |
| A_68_P28615783 | chr12:88728757-88728801                           | NM_011479:402      | Sptlc2     | INSIDE                 | 1.534                                                        | 2.160                          | 1028.58            | 2221.43            | 3.312                          | 828.94             | 2745.68            |
| A_68_P25102500 | chr7:54263669-54263713                            | NM_175318:94       | Spty2d1    | INSIDE                 | 1.742                                                        | 3.016                          | 3244.63            | 9784.45            | 5.252                          | 2553.17            | 13408.54           |
| A_68_P21587981 | chr2:122591010-122591054                          | NM_001162503:-62   | Sqrd1      | PROMOTER               | 2.501                                                        | 7.553                          | 2476.02            | 18700.67           | 18.891                         | 1784.22            | 33705.88           |
| A_68_P27787321 | chr11:50023806-50023850                           | NM_011018:464      | Sqstm1     | INSIDE                 | 1.738                                                        | 4.742                          | 6644.51            | 31510.94           | 8.244                          | 4503.50            | 37125.14           |
| A_68_P21777116 | chr2:157282885-157282929                          | NM_001025395:32878 | Src        | INSIDE                 | 1.624                                                        | 1.761                          | 1431.74            | 2521.94            | 2.861                          | 1201.96            | 3438.40            |
| A_68_P24118747 | chr5:136438697-136438741                          | NM_001160366:11628 | Srerb4d    | INSIDE                 | 2.078                                                        | 3.036                          | 1843.78            | 5597.98            | 6.308                          | 1464.81            | 9240.73            |
| A_68_P23814358 | chr5:76569347-76569391                            | NM_020611:71       | Srd5a3     | INSIDE                 | 1.913                                                        | 3.279                          | 1314.92            | 4311.92            | 6.273                          | 972.42             | 6100.40            |

| ProbeName      | Target position of probe on CpG island microarray | TargetID          | GeneSymbol | CpG island Description | Ratio of relative methylation (TiO <sub>2</sub> -NP/Vehicle) | Sham group                     |                    |                    | TiO <sub>2</sub> -H group      |                    |                    |
|----------------|---------------------------------------------------|-------------------|------------|------------------------|--------------------------------------------------------------|--------------------------------|--------------------|--------------------|--------------------------------|--------------------|--------------------|
|                |                                                   |                   |            |                        |                                                              | Relative methylation (Cy5/Cy3) | Cy3 signal (Input) | Cy5 signal (MeDIP) | Relative methylation (Cy5/Cy3) | Cy3 signal (Input) | Cy5 signal (MeDIP) |
| A_68_P27841688 | chr11:60034191-60034235                           | NM_011480:-106    | Srebf1     | PROMOTER               | 1.635                                                        | 1.775                          | 1170.73            | 2077.55            | 2.902                          | 1024.89            | 2974.20            |
| A_68_P30381701 | chr15:81977690-81977734                           | NM_033218:14      | Srebf2     | INSIDE                 | 1.641                                                        | 2.567                          | 7370.16            | 18917.36           | 4.213                          | 5529.92            | 23299.25           |
| A_68_P31207579 | chr17:46692454-46692498                           | NM_020493:635     | Srf        | INSIDE                 | 1.535                                                        | 2.991                          | 2127.40            | 6364.07            | 4.593                          | 1763.88            | 8101.18            |
| A_68_P31612299 | chr18:34490607-34490651                           | NM_025527:-170    | Srp19      | PROMOTER               | 1.509                                                        | 2.820                          | 1687.65            | 4759.55            | 4.255                          | 1369.71            | 5827.73            |
| A_68_P23819150 | chr5:77403737-77403781                            | NM_025691:33      | Srp72      | INSIDE                 | 1.827                                                        | 5.143                          | 3782.81            | 19453.76           | 9.396                          | 2820.82            | 26505.70           |
| A_68_P23991577 | chr5:112772027-112772071                          | NM_027323:12      | Srrd       | INSIDE                 | 1.788                                                        | 3.757                          | 18048.04           | 67814.54           | 6.717                          | 14956.85           | 100468.50          |
| A_68_P31093720 | chr17:23940883-23940927                           | NM_175229:751     | Srrm2      | INSIDE                 | 2.212                                                        | 2.483                          | 1982.45            | 4923.18            | 5.494                          | 1454.97            | 7994.04            |
| A_68_P22825736 | chr4:33296596-33296640                            | NM_177774:653     | Srsf12     | INSIDE                 | 1.527                                                        | 3.172                          | 5337.83            | 16931.31           | 4.845                          | 3663.72            | 17751.12           |
| A_68_P28161643 | chr11:116713965-116714009                         | NM_011358:422     | Srsf2      | INSIDE                 | 1.515                                                        | 2.553                          | 535.98             | 1368.48            | 3.867                          | 467.60             | 1808.41            |
| A_68_P23308821 | chr4:131429974-131430018                          | NM_020587:443     | Srsf4      | INSIDE                 | 1.775                                                        | 1.555                          | 884.71             | 1375.62            | 2.760                          | 827.18             | 2283.21            |
| A_68_P28578489 | chr12:82047116-82047160                           | NM_001079694:648  | Srsf5      | INSIDE                 | 2.113                                                        | 3.899                          | 533.87             | 2081.51            | 8.237                          | 451.24             | 3716.87            |
| A_68_P24009031 | chr5:115777029-115777073                          | NM_025573:-135    | Srsf9      | PROMOTER               | 1.556                                                        | 4.084                          | 2154.06            | 8797.49            | 6.357                          | 1708.11            | 10857.85           |
| A_68_P31513737 | chr18:14841164-14841208                           | NM_001161369:237  | Ss18       | INSIDE                 | 1.623                                                        | 5.982                          | 1313.71            | 7859.24            | 9.711                          | 1187.27            | 11529.15           |
| A_68_P31513736 | chr18:14841066-14841110                           | NM_001161369:335  | Ss18       | INSIDE                 | 1.730                                                        | 1.539                          | 893.89             | 1376.05            | 2.663                          | 779.30             | 2075.10            |
| A_68_P29218716 | chr13:91599885-91599929                           | NM_024186:-795    | Ssbp2      | PROMOTER               | 2.476                                                        | 16.971                         | 563.62             | 9565.23            | 42.025                         | 488.52             | 20530.01           |
| A_68_P29218720 | chr13:91600319-91600363                           | NM_024186:-361    | Ssbp2      | PROMOTER               | 1.588                                                        | 4.755                          | 2770.98            | 13176.69           | 7.551                          | 2307.64            | 17424.88           |
| A_68_P29218723 | chr13:91600897-91600941                           | NM_024186:217     | Ssbp2      | INSIDE                 | 1.517                                                        | 4.122                          | 4099.33            | 16896.23           | 6.251                          | 3046.95            | 19047.37           |
| A_68_P27937051 | chr11:77161599-77161643                           | NM_177710:131694  | Ssh2       | INSIDE                 | 1.533                                                        | 4.004                          | 1450.50            | 5807.99            | 6.140                          | 1278.99            | 7852.84            |
| A_68_P21071033 | chr2:25127873-25127917                            | NM_023464:44      | Ssn1       | INSIDE                 | 1.645                                                        | 2.674                          | 2235.25            | 5976.17            | 4.398                          | 1902.58            | 8367.84            |
| A_68_P22199719 | chr3:65196469-65196513                            | NM_026155:-15     | Ssr3       | PROMOTER               | 2.746                                                        | 17.796                         | 15091.40           | 268560.50          | 48.865                         | 7125.09            | 348164.30          |
| A_68_P28466190 | chr12:59313609-59313653                           | NM_009216:840     | Sstr1      | INSIDE                 | 1.619                                                        | 5.454                          | 1300.46            | 7092.60            | 8.829                          | 990.04             | 8741.09            |
| A_68_P23440100 | chr4:155079091-155079135                          | NM_026899:189     | Ssu72      | INSIDE                 | 2.023                                                        | 4.457                          | 9756.79            | 43489.91           | 9.016                          | 7677.19            | 69218.56           |
| A_68_P23440105 | chr4:155079607-155079651                          | NM_026899:705     | Ssu72      | INSIDE                 | 2.020                                                        | 6.071                          | 1128.51            | 6850.95            | 12.263                         | 891.79             | 10935.81           |
| A_68_P22614372 | chr3:146067861-146067905                          | NM_138744:232     | Ssx2ip     | INSIDE                 | 1.658                                                        | 6.185                          | 795.13             | 4917.62            | 10.254                         | 736.50             | 7552.35            |
| A_68_P26398844 | chr9:30939486-30939530                            | NM_011176:-124    | St14       | PROMOTER               | 2.197                                                        | 4.125                          | 7544.95            | 31124.72           | 9.064                          | 5133.42            | 46531.13           |
| A_68_P26165552 | chr8:113443992-113444036                          | NM_009179:250     | St3gal2    | INSIDE                 | 1.692                                                        | 4.347                          | 2103.08            | 9142.78            | 7.357                          | 1692.26            | 12450.05           |
| A_68_P26165551 | chr8:113443849-113443893                          | NM_009179:106     | St3gal2    | INSIDE                 | 1.585                                                        | 1.358                          | 1611.73            | 2188.02            | 2.152                          | 1539.91            | 3313.18            |
| A_68_P30601918 | chr16:23225193-23225237                           | NM_145933:380     | St6gal1    | INSIDE                 | 1.904                                                        | 2.661                          | 1893.74            | 5038.34            | 5.066                          | 1478.16            | 7487.62            |
| A_68_P30601919 | chr16:23225265-23225309                           | NM_145933:452     | St6gal1    | INSIDE                 | 1.641                                                        | 2.234                          | 1424.73            | 3183.27            | 3.666                          | 1177.58            | 4317.57            |
| A_68_P31251161 | chr17:55585081-55585126                           | NM_172829:89      | St6gal2    | INSIDE                 | 1.508                                                        | 1.632                          | 618.68             | 1009.67            | 2.461                          | 567.75             | 1397.19            |
| A_68_P22658557 | chr3:153388050-153388094                          | NM_011372:25      | St6galnac3 | INSIDE                 | 1.583                                                        | 2.667                          | 3430.94            | 9151.06            | 4.222                          | 2955.87            | 12479.41           |
| A_68_P21116393 | chr2:32468028-32468072                            | NM_001025310:5570 | St6galnac6 | INSIDE                 | 1.925                                                        | 8.406                          | 3661.88            | 30782.19           | 16.185                         | 2404.68            | 38920.51           |
| A_68_P25232263 | chr7:81157988-81158032                            | NM_009181:558     | St8sia2    | INSIDE                 | 2.023                                                        | 4.807                          | 8465.95            | 40693.13           | 9.725                          | 6151.28            | 59819.75           |
| A_68_P25232267 | chr7:81158422-81158466                            | NM_009181:124     | St8sia2    | INSIDE                 | 1.639                                                        | 4.897                          | 579.54             | 2837.93            | 8.027                          | 450.86             | 3618.93            |
| A_68_P28054168 | chr11:97913868-97913912                           | NM_146028:886     | Stac2      | INSIDE                 | 1.654                                                        | 2.484                          | 8806.47            | 21877.27           | 4.109                          | 6437.64            | 26455.20           |
| A_68_P25372610 | chr7:108469852-108469896                          | NM_019990:42      | Stard10    | INSIDE                 | 2.367                                                        | 5.981                          | 15543.06           | 92958.13           | 14.156                         | 11160.96           | 157990.00          |
| A_68_P28862223 | chr13:19487305-19487349                           | NM_024270:295     | Stard3nl   | INSIDE                 | 1.660                                                        | 1.728                          | 1020.53            | 1763.43            | 2.869                          | 858.88             | 2464.22            |
| A_68_P32553143 | chrX:96238297-96238345                            | NM_199018:401     | Stard8     | INSIDE                 | 2.484                                                        | 6.859                          | 445.03             | 3052.42            | 17.039                         | 246.79             | 4205.01            |
| A_68_P32553141 | chrX:96238064-96238108                            | NM_199018:167     | Stard8     | INSIDE                 | 1.904                                                        | 4.549                          | 2633.26            | 11979.79           | 8.662                          | 1594.17            | 13808.89           |
| A_68_P23457345 | chr5:5749151-5749195                              | NM_027399:145     | Steap1     | INSIDE                 | 1.814                                                        | 5.963                          | 5147.22            | 30691.20           | 10.818                         | 4433.72            | 47962.54           |
| A_68_P25377989 | chr7:109416038-109416082                          | NM_009287:-277    | Stim1      | PROMOTER               | 1.661                                                        | 5.566                          | 1377.22            | 7666.18            | 9.247                          | 1143.42            | 10572.66           |
| A_68_P25377988 | chr7:109415960-109416004                          | NM_009287:-355    | Stim1      | PROMOTER               | 1.588                                                        | 3.944                          | 1503.95            | 5931.63            | 6.262                          | 1256.37            | 7866.97            |
| A_68_P23703749 | chr5:54390129-54390173                            | NM_001081103:389  | Stim2      | INSIDE                 | 1.572                                                        | 4.884                          | 1311.45            | 6404.52            | 7.676                          | 1102.18            | 8460.46            |
| A_68_P20456742 | chr1:95532281-95532325                            | NM_021537:2       | Stk25      | INSIDE                 | 1.901                                                        | 5.375                          | 5391.60            | 28979.31           | 10.220                         | 4104.03            | 41941.65           |
| A_68_P24432387 | chr6:49345594-49345638                            | NM_029916:114     | Stk31      | INSIDE                 | 1.731                                                        | 6.766                          | 7487.28            | 50658.23           | 11.713                         | 5534.60            | 64827.12           |
| A_68_P31659996 | chr18:43367102-43367146                           | NM_178749:-226    | Stk32a     | PROMOTER               | 1.899                                                        | 6.224                          | 3351.87            | 20860.38           | 11.820                         | 2474.30            | 29245.91           |
| A_68_P25576307 | chr7:146374240-146374284                          | NM_021302:131     | Stk32c     | INSIDE                 | 1.803                                                        | 4.492                          | 1127.51            | 5065.01            | 8.099                          | 961.82             | 7790.11            |



| ProbeName      | Target position of probe on CpG island microarray | TargetID          | GeneSymbol | CpG island Description | Ratio of relative methylation (TiO <sub>2</sub> -NP/Vehicle) | Sham group                     |                    |                    | TiO <sub>2</sub> -H group      |                    |                    |
|----------------|---------------------------------------------------|-------------------|------------|------------------------|--------------------------------------------------------------|--------------------------------|--------------------|--------------------|--------------------------------|--------------------|--------------------|
|                |                                                   |                   |            |                        |                                                              | Relative methylation (Cy5/Cy3) | Cy3 signal (Input) | Cy5 signal (MeDIP) | Relative methylation (Cy5/Cy3) | Cy3 signal (Input) | Cy5 signal (MeDIP) |
| A_68_P25408016 | chr7:116582357-116582401                          | NM_054103:189     | Stk33      | INSIDE                 | 1.933                                                        | 3.287                          | 1844.54            | 6063.05            | 6.353                          | 1448.65            | 9202.64            |
| A_68_P28635993 | chr12:92886575-92886620                           | NM_175367:138279  | Ston2      | INSIDE                 | 1.516                                                        | 2.163                          | 294.02             | 636.00             | 3.280                          | 230.66             | 756.53             |
| A_68_P27187531 | chr10:62188832-62188876                           | NM_001033260:-7   | Stox1      | PROMOTER               | 1.517                                                        | 3.109                          | 1793.62            | 5576.70            | 4.717                          | 1443.07            | 6807.33            |
| A_68_P24880087 | chr6:137683557-137683601                          | NM_011499:-24     | Strap      | PROMOTER               | 1.675                                                        | 4.583                          | 993.38             | 4552.59            | 7.675                          | 898.68             | 6897.24            |
| A_68_P31373358 | chr17:79136029-79136073                           | NM_011500:-150    | Strn       | PROMOTER               | 2.327                                                        | 2.976                          | 1194.14            | 3553.45            | 6.925                          | 955.41             | 6616.44            |
| A_68_P28431157 | chr12:52792863-52792907                           | NM_001172098:17   | Strn3      | INSIDE                 | 1.570                                                        | 1.974                          | 635.80             | 1255.32            | 3.100                          | 541.32             | 1678.28            |
| A_68_P24114435 | chr5:135518130-135518174                          | NM_016801:18711   | Stx1a      | INSIDE                 | 1.518                                                        | 10.296                         | 11814.23           | 121639.30          | 15.628                         | 7533.59            | 117737.10          |
| A_68_P25507562 | chr7:134967999-134968043                          | NM_024414:25      | Stx1b      | INSIDE                 | 1.656                                                        | 2.692                          | 6088.86            | 16388.52           | 4.459                          | 4698.34            | 20947.61           |
| A_68_P26932995 | chr10:9620910-9620954                             | NM_001081344:-94  | Stxbp5     | PROMOTER               | 1.559                                                        | 2.555                          | 589.32             | 1505.86            | 3.985                          | 591.01             | 2355.10            |
| A_68_P26932993 | chr10:9620586-9620630                             | NM_001081344:230  | Stxbp5     | INSIDE                 | 1.538                                                        | 17.246                         | 1505.89            | 25970.25           | 26.529                         | 1250.90            | 33185.50           |
| A_68_P29718152 | chr14:73952682-73952726                           | NM_011506:112     | Sucla2     | INSIDE                 | 1.843                                                        | 4.831                          | 1652.03            | 7980.50            | 8.905                          | 1393.34            | 12407.05           |
| A_68_P24018800 | chr5:117566119-117566163                          | NM_001122666:-138 | Suds3      | DIVERGENT_PROMOTER     | 1.578                                                        | 3.103                          | 670.81             | 2081.47            | 4.896                          | 648.91             | 3176.91            |
| A_68_P29752204 | chr14:79987400-79987444                           | NM_026474:-75     | Sugt1      | PROMOTER               | 1.924                                                        | 4.763                          | 3302.53            | 15728.79           | 9.163                          | 2623.06            | 24035.36           |
| A_68_P28154074 | chr11:115397049-115397093                         | NM_133354:474     | Sumo2      | INSIDE                 | 1.984                                                        | 7.154                          | 14395.30           | 102980.70          | 14.191                         | 11130.77           | 157957.40          |
| A_68_P24134134 | chr5:139677035-139677079                          | NM_024451:433     | Sun1       | INSIDE                 | 2.181                                                        | 5.783                          | 2783.77            | 16099.74           | 12.615                         | 1839.83            | 23209.33           |
| A_68_P24134133 | chr5:139676870-139676914                          | NM_024451:269     | Sun1       | INSIDE                 | 1.817                                                        | 1.607                          | 767.61             | 1233.68            | 2.920                          | 1083.62            | 3164.28            |
| A_68_P27542559 | chr10:128105989-128106033                         | NM_173733:4964    | Suox       | DOWNSTREAM             | 1.765                                                        | 4.909                          | 11211.50           | 55040.77           | 8.663                          | 7886.81            | 68326.57           |
| A_68_P29605230 | chr14:52816435-52816479                           | NM_033618:458     | Supt16h    | INSIDE                 | 1.940                                                        | 4.812                          | 2932.18            | 14109.05           | 9.334                          | 2379.69            | 22211.42           |
| A_68_P29605237 | chr14:52817103-52817147                           | NM_033618:-210    | Supt16h    | PROMOTER               | 1.755                                                        | 1.527                          | 2216.53            | 3384.63            | 2.681                          | 1820.08            | 4878.78            |
| A_68_P31197210 | chr17:44914016-44914060                           | NM_178652:-81     | Supt3h     | PROMOTER               | 1.782                                                        | 4.329                          | 2694.77            | 11664.92           | 7.713                          | 2128.74            | 16418.48           |
| A_68_P27995861 | chr11:87550950-87550994                           | NM_009296:-94     | Supt4h1    | PROMOTER               | 2.114                                                        | 6.564                          | 2326.72            | 15273.06           | 13.877                         | 1692.93            | 23493.62           |
| A_68_P29024152 | chr13:49343166-49343210                           | NM_025491:344     | Susd3      | INSIDE                 | 1.817                                                        | 1.837                          | 1441.29            | 2648.13            | 3.338                          | 1207.12            | 4029.69            |
| A_68_P25239159 | chr7:82453955-82453999                            | NM_001109753:-704 | Sv2b       | PROMOTER               | 1.514                                                        | 4.067                          | 2346.69            | 9543.51            | 6.158                          | 1944.04            | 11971.56           |
| A_68_P29244723 | chr13:96902535-96902579                           | NM_029210:-24     | Sv2c       | PROMOTER               | 1.517                                                        | 1.877                          | 1202.09            | 2255.91            | 2.847                          | 970.77             | 2764.28            |
| A_68_P25126430 | chr7:59261254-59261298                            | NR_027704:-192    | Svip       | PROMOTER               | 1.626                                                        | 3.084                          | 7032.53            | 21687.90           | 5.015                          | 5516.22            | 27665.59           |
| A_68_P24001851 | chr5:114541342-114541386                          | NM_026805:25      | Svop       | INSIDE                 | 1.753                                                        | 5.740                          | 2988.43            | 17153.90           | 10.061                         | 2550.77            | 25662.82           |
| A_68_P25412183 | chr7:117365487-117365531                          | NM_009302:292     | Swap70     | INSIDE                 | 1.972                                                        | 5.336                          | 5679.82            | 30307.86           | 10.520                         | 4381.06            | 46089.90           |
| A_68_P25412180 | chr7:117365261-117365305                          | NM_009302:66      | Swap70     | INSIDE                 | 1.550                                                        | 5.265                          | 1061.01            | 5585.94            | 8.159                          | 899.62             | 7339.83            |
| A_68_P22383504 | chr3:102739949-102739993                          | NM_011516:53      | Sycp1      | INSIDE                 | 1.555                                                        | 3.031                          | 522.26             | 1582.80            | 4.713                          | 383.30             | 1806.57            |
| A_68_P21890548 | chr2:178142227-178142271                          | NM_177191:115     | Sycp2      | INSIDE                 | 1.673                                                        | 4.488                          | 7874.68            | 35339.82           | 7.508                          | 6281.03            | 47156.69           |
| A_68_P21890546 | chr2:178142021-178142065                          | NM_177191:321     | Sycp2      | INSIDE                 | 1.616                                                        | 3.732                          | 5809.31            | 21681.31           | 6.031                          | 4181.96            | 25221.88           |
| A_68_P27325555 | chr10:87922666-87922710                           | NM_011517:357     | Sycp3      | INSIDE                 | 1.532                                                        | 7.924                          | 5644.23            | 44726.54           | 12.140                         | 3909.36            | 47458.33           |
| A_68_P23325610 | chr4:134487232-134487276                          | NM_026780:360     | Syf2       | INSIDE                 | 2.288                                                        | 21.890                         | 11179.55           | 244721.20          | 50.094                         | 7846.17            | 393047.30          |
| A_68_P24769157 | chr6:115084895-115084939                          | NM_013681:-3      | Syn2       | PROMOTER               | 2.043                                                        | 2.768                          | 1816.41            | 5028.12            | 5.654                          | 1390.76            | 7863.42            |
| A_68_P26710370 | chr9:88377975-88378019                            | NM_019796:-761    | Syncrip    | PROMOTER               | 2.138                                                        | 5.150                          | 1514.87            | 7801.64            | 11.009                         | 1911.15            | 13113.61           |
| A_68_P28167342 | chr11:117671257-117671301                         | NM_009304:298     | Syngr2     | INSIDE                 | 1.550                                                        | 2.821                          | 975.53             | 2752.34            | 4.374                          | 772.61             | 3379.42            |
| A_68_P31099001 | chr17:24824425-24824469                           | NM_011522:2448    | Syngr3     | INSIDE                 | 2.091                                                        | 8.282                          | 15324.02           | 126913.40          | 17.318                         | 9704.87            | 168065.90          |
| A_68_P30960416 | chr16:91010827-91010871                           | NM_001045515:492  | Synj1      | INSIDE                 | 2.196                                                        | 7.714                          | 957.87             | 7388.76            | 16.937                         | 792.63             | 13424.86           |
| A_68_P25195707 | chr7:74904146-74904190                            | NM_183312:460     | Synn       | INSIDE                 | 1.606                                                        | 1.807                          | 1191.57            | 2153.03            | 2.902                          | 1015.20            | 2946.60            |
| A_68_P25195705 | chr7:74903906-74903950                            | NM_183312:700     | Synn       | INSIDE                 | 1.543                                                        | 2.131                          | 1661.38            | 3540.87            | 3.288                          | 1378.62            | 4533.34            |
| A_68_P27974634 | chr11:83777899-83777943                           | NM_001115009:-9   | Synrg      | PROMOTER               | 1.523                                                        | 2.208                          | 376.20             | 830.79             | 3.364                          | 416.91             | 1402.61            |
| A_68_P20946920 | chr1:194861857-194861901                          | NM_181546:14      | Syt14      | INSIDE                 | 1.758                                                        | 3.505                          | 904.97             | 3171.63            | 6.162                          | 732.36             | 4513.01            |
| A_68_P25458299 | chr7:125591289-125591333                          | NM_138649:-4244   | Syt17      | PROMOTER               | 1.683                                                        | 5.072                          | 2430.45            | 12326.97           | 8.537                          | 2032.42            | 17351.21           |
| A_68_P25458297 | chr7:125591038-125591082                          | NM_138649:-3994   | Syt17      | PROMOTER               | 1.649                                                        | 2.016                          | 354.57             | 714.92             | 3.324                          | 307.88             | 1023.45            |
| A_68_P20634933 | chr1:136605811-136605855                          | NM_009307:62575   | Syt2       | INSIDE                 | 1.509                                                        | 2.023                          | 1859.43            | 3762.50            | 3.053                          | 1570.85            | 4795.85            |
| A_68_P32506209 | chrX:82819101-82819145                            | NM_025729:-238    | Tab3       | PROMOTER               | 2.228                                                        | 5.900                          | 2141.79            | 12636.44           | 13.145                         | 1254.89            | 16495.16           |
| A_68_P24759109 | chr6:113327446-113327490                          | NM_133932:46      | Tada3      | INSIDE                 | 1.691                                                        | 3.894                          | 1254.60            | 4885.71            | 6.584                          | 1005.79            | 6621.83            |

| ProbeName      | Target position of probe on CpG island microarray | TargetID          | GeneSymbol | CpG island Description | Ratio of relative methylation (TiO <sub>2</sub> -NP/Vehicle) | Sham group                     |                    |                    | TiO <sub>2</sub> -H group      |                    |                    |
|----------------|---------------------------------------------------|-------------------|------------|------------------------|--------------------------------------------------------------|--------------------------------|--------------------|--------------------|--------------------------------|--------------------|--------------------|
|                |                                                   |                   |            |                        |                                                              | Relative methylation (Cy5/Cy3) | Cy3 signal (Input) | Cy5 signal (MeDIP) | Relative methylation (Cy5/Cy3) | Cy3 signal (Input) | Cy5 signal (MeDIP) |
| A_68_P23311001 | chr4:131830273-131830317                          | NM_025579:5       | Taf12      | INSIDE                 | 1.613                                                        | 11.344                         | 3315.90            | 37616.64           | 18.297                         | 2386.77            | 43669.74           |
| A_68_P30230212 | chr15:54903756-54903800                           | NM_001081288:-71  | Taf2       | PROMOTER               | 1.901                                                        | 4.632                          | 1981.73            | 9179.20            | 8.804                          | 1705.00            | 15010.15           |
| A_68_P20998559 | chr2:9970073-9970117                              | NM_027748:142     | Taf3       | INSIDE                 | 1.999                                                        | 3.882                          | 2680.44            | 10404.16           | 7.759                          | 2242.04            | 17396.16           |
| A_68_P26242940 | chr8:126544834-126544878                          | NM_133966:353     | Taf51      | INSIDE                 | 1.763                                                        | 4.722                          | 1079.06            | 5094.78            | 8.322                          | 864.28             | 7192.74            |
| A_68_P26242939 | chr8:126544720-126544764                          | NM_133966:467     | Taf51      | INSIDE                 | 1.731                                                        | 7.775                          | 676.84             | 5262.41            | 13.462                         | 525.48             | 7074.04            |
| A_68_P32672214 | chrX:131010586-131010630                          | NM_028958:421     | Taf71      | INSIDE                 | 2.192                                                        | 4.631                          | 1820.18            | 8429.86            | 10.151                         | 797.38             | 8094.39            |
| A_68_P32583453 | chrX:103415136-103415180                          | NM_001001176:23   | Taf9b      | INSIDE                 | 2.223                                                        | 6.738                          | 958.05             | 6455.48            | 14.979                         | 638.42             | 9563.02            |
| A_68_P23223131 | chr4:114729380-114729424                          | NM_011527:-2729   | Tal1       | PROMOTER               | 1.528                                                        | 1.748                          | 4063.28            | 7104.22            | 2.671                          | 3092.87            | 8261.82            |
| A_68_P25588514 | chr7:148577796-148577840                          | NM_011528:-240    | Taldo1     | PROMOTER               | 1.699                                                        | 1.899                          | 1080.94            | 2052.65            | 3.227                          | 874.05             | 2820.31            |
| A_68_P27938553 | chr11:77421084-77421128                           | NM_144825:211     | Taok1      | INSIDE                 | 2.421                                                        | 10.195                         | 1625.76            | 16575.32           | 24.688                         | 1096.06            | 27059.37           |
| A_68_P20936016 | chr1:192886793-192886837                          | NM_001163421:-3   | Tatdn3     | DIVERGENT_PROMOTER     | 1.528                                                        | 2.584                          | 13552.33           | 35014.66           | 3.948                          | 11020.49           | 43506.03           |
| A_68_P24452215 | chr6:52664021-52664065                            | NM_025816:320     | Tax1bp1    | INSIDE                 | 1.697                                                        | 6.629                          | 2894.54            | 19187.84           | 11.248                         | 2434.57            | 27383.92           |
| A_68_P23749456 | chr5:64551627-64551671                            | NM_019636:199     | Tbcd1d     | INSIDE                 | 2.251                                                        | 6.568                          | 13603.88           | 89353.73           | 14.786                         | 9241.51            | 136648.90          |
| A_68_P23749454 | chr5:64551417-64551461                            | NM_019636:-11     | Tbcd1d     | PROMOTER               | 1.529                                                        | 1.732                          | 1641.37            | 2843.35            | 2.650                          | 1396.68            | 3700.54            |
| A_68_P23749879 | chr5:64621748-64621793                            | NM_019636:70321   | Tbcd1d     | INSIDE                 | 1.527                                                        | 3.790                          | 7787.71            | 29513.45           | 5.786                          | 6371.74            | 36869.30           |
| A_68_P23608585 | chr5:36924742-36924786                            | NM_133910:282     | Tbcd1d14   | INSIDE                 | 1.901                                                        | 2.812                          | 13547.19           | 38091.92           | 5.346                          | 9749.13            | 52114.66           |
| A_68_P21748557 | chr2:152119766-152119810                          | NM_024196:181     | Tbcd1d20   | INSIDE                 | 1.548                                                        | 5.502                          | 3289.69            | 18098.61           | 8.515                          | 2765.79            | 23551.72           |
| A_68_P21748558 | chr2:152119855-152119899                          | NM_024196:269     | Tbcd1d20   | INSIDE                 | 1.510                                                        | 3.767                          | 2842.08            | 10706.49           | 5.687                          | 2383.82            | 13556.14           |
| A_68_P31232583 | chr17:51318678-51318722                           | NM_028162:-26     | Tbcd1d5    | PROMOTER               | 1.627                                                        | 2.670                          | 1622.53            | 4332.51            | 4.344                          | 1220.79            | 5303.73            |
| A_68_P29236942 | chr13:95558754-95558798                           | NM_009321:-121    | Tbca       | PROMOTER               | 2.017                                                        | 4.511                          | 2758.98            | 12446.79           | 9.101                          | 2323.29            | 21144.94           |
| A_68_P31209382 | chr17:47026332-47026376                           | NM_178385:-1215   | Tbcc       | PROMOTER               | 1.733                                                        | 4.014                          | 1076.92            | 4322.30            | 6.957                          | 914.68             | 6363.05            |
| A_68_P27504343 | chr10:121023890-121023934                         | NM_019786:-62     | Tbk1       | PROMOTER               | 1.835                                                        | 6.046                          | 1165.23            | 7045.24            | 11.095                         | 1100.61            | 12211.23           |
| A_68_P28048904 | chr11:97000172-97000216                           | NM_198100:10832   | Tbkbp1     | INSIDE                 | 1.662                                                        | 4.015                          | 955.93             | 3838.25            | 6.672                          | 792.12             | 5284.78            |
| A_68_P24114960 | chr5:135625731-135625775                          | NM_013763:172     | Tbl2       | INSIDE                 | 1.670                                                        | 3.290                          | 1092.96            | 3595.91            | 5.494                          | 907.58             | 4986.45            |
| A_68_P21266439 | chr2:61649898-61649942                            | NM_009322:7411    | Tbr1       | INSIDE                 | 1.537                                                        | 2.571                          | 364.72             | 937.82             | 3.952                          | 383.31             | 1514.93            |
| A_68_P21266440 | chr2:61650101-61650145                            | NM_009322:7613    | Tbr1       | INSIDE                 | 1.879                                                        | 2.100                          | 424.79             | 892.06             | 3.945                          | 412.76             | 1628.36            |
| A_68_P30580602 | chr16:18586865-18586909                           | NM_011532:176     | Tbx1       | INSIDE                 | 1.611                                                        | 3.668                          | 2181.79            | 8002.39            | 5.908                          | 1820.13            | 10753.60           |
| A_68_P27985587 | chr11:85651691-85651735                           | NM_009324:5596    | Tbx2       | INSIDE                 | 1.595                                                        | 1.611                          | 1802.26            | 2903.35            | 2.570                          | 1401.10            | 3600.16            |
| A_68_P23332899 | chr4:135804076-135804120                          | NM_011542:227     | Tcea3      | INSIDE                 | 1.586                                                        | 2.093                          | 1284.42            | 2687.88            | 3.319                          | 1047.49            | 3476.56            |
| A_68_P23331724 | chr4:135577368-135577412                          | NM_013736:174     | Tceb3      | INSIDE                 | 1.724                                                        | 5.009                          | 4526.26            | 22670.37           | 8.633                          | 3689.98            | 31854.49           |
| A_68_P31655789 | chr18:42671379-42671423                           | NM_001039474:260  | Tcerg1     | INSIDE                 | 1.706                                                        | 7.326                          | 13803.96           | 101132.70          | 12.500                         | 9150.65            | 114384.80          |
| A_68_P31655791 | chr18:42671723-42671767                           | NM_001039474:604  | Tcerg1     | INSIDE                 | 1.537                                                        | 1.628                          | 1908.82            | 3108.31            | 2.502                          | 1457.80            | 3647.64            |
| A_68_P25571662 | chr7:145589207-145589251                          | NM_183289:185     | Tcerg11    | INSIDE                 | 2.863                                                        | 9.562                          | 4573.94            | 43735.11           | 27.371                         | 2937.71            | 80409.07           |
| A_68_P26626137 | chr9:71959791-71959835                            | NM_011544:-186    | Tcf12      | PROMOTER               | 1.508                                                        | 4.049                          | 2317.19            | 9381.37            | 6.106                          | 2028.59            | 12386.53           |
| A_68_P31159487 | chr17:35653700-35653744                           | NM_001163763:47   | Tcf19      | INSIDE                 | 1.620                                                        | 2.076                          | 1916.59            | 3979.58            | 3.364                          | 1478.90            | 4975.61            |
| A_68_P26239531 | chr8:125898300-125898344                          | NM_001037877:588  | Tcf25      | INSIDE                 | 1.637                                                        | 4.492                          | 13008.45           | 58440.41           | 7.353                          | 8218.25            | 60426.39           |
| A_68_P27798408 | chr11:52096304-52096348                           | NM_009331:-574    | Tcf7       | PROMOTER               | 1.611                                                        | 1.663                          | 2733.97            | 4546.98            | 2.679                          | 2168.01            | 5807.09            |
| A_68_P32197338 | chr19:55969833-55969892                           | NM_001142924:52   | Tcf7l2     | INSIDE                 | 1.968                                                        | 5.017                          | 167.54             | 840.57             | 9.872                          | 114.89             | 1134.25            |
| A_68_P28974187 | chr13:40826726-40826770                           | NM_001122948:-936 | Tcfap2a    | PROMOTER               | 1.725                                                        | 2.982                          | 3597.64            | 10726.98           | 5.142                          | 2801.51            | 14405.41           |
| A_68_P28974164 | chr13:40824040-40824084                           | NM_001122948:1750 | Tcfap2a    | INSIDE                 | 1.709                                                        | 4.053                          | 3801.80            | 15408.83           | 6.928                          | 3002.30            | 20798.76           |
| A_68_P22336399 | chr3:93248419-93248463                            | NM_001163098:2189 | Tchh       | INSIDE                 | 2.183                                                        | 41.121                         | 2242.23            | 92201.51           | 89.767                         | 1225.81            | 110037.50          |
| A_68_P31120338 | chr17:28217573-28217617                           | NM_001085555:-10  | Tep11      | PROMOTER               | 2.106                                                        | 4.187                          | 3641.41            | 15248.33           | 8.819                          | 2657.60            | 23437.56           |
| A_68_P31120336 | chr17:28217206-28217250                           | NM_013687:301     | Tep11      | INSIDE                 | 1.703                                                        | 8.975                          | 36936.59           | 331494.10          | 15.286                         | 22975.57           | 351212.70          |
| A_68_P20742449 | chr1:158233625-158233669                          | NM_001134741:-167 | Tdrd5      | DIVERGENT_PROMOTER     | 2.212                                                        | 9.538                          | 2976.99            | 28395.71           | 21.102                         | 2346.43            | 49515.32           |
| A_68_P25091867 | chr7:52471545-52471589                            | NM_011565:444     | Tead2      | INSIDE                 | 2.215                                                        | 15.992                         | 4898.00            | 78330.04           | 35.420                         | 3007.66            | 106531.60          |
| A_68_P31121999 | chr17:28487626-28487670                           | NM_001098226:-103 | Tead3      | PROMOTER               | 1.576                                                        | 1.906                          | 4153.46            | 7917.25            | 3.004                          | 3102.91            | 9321.84            |
| A_68_P24160101 | chr5:144984767-144984811                          | NM_027410:-341    | Tecpr1     | PROMOTER               | 1.827                                                        | 1.830                          | 1178.84            | 2157.15            | 3.343                          | 846.77             | 2831.13            |

| ProbeName      | Target position of probe on CpG island microarray | TargetID          | GeneSymbol | CpG island Description | Ratio of relative methylation (TiO <sub>2</sub> -NP/Vehicle) | Sham group                     |                    |                    | TiO <sub>2</sub> -H group      |                    |                    |
|----------------|---------------------------------------------------|-------------------|------------|------------------------|--------------------------------------------------------------|--------------------------------|--------------------|--------------------|--------------------------------|--------------------|--------------------|
|                |                                                   |                   |            |                        |                                                              | Relative methylation (Cy5/Cy3) | Cy3 signal (Input) | Cy5 signal (MeDIP) | Relative methylation (Cy5/Cy3) | Cy3 signal (Input) | Cy5 signal (MeDIP) |
| A_68_P26015636 | chr8:86118488-86118532                            | NM_027179:-120    | Tecr       | PROMOTER               | 1.682                                                        | 3.147                          | 1544.48            | 4861.07            | 5.293                          | 1080.67            | 5720.53            |
| A_68_P30379756 | chr15:81641379-81641423                           | NM_017376:-443    | Tef        | PROMOTER               | 1.608                                                        | 3.952                          | 12834.27           | 50717.44           | 6.355                          | 10155.86           | 64536.56           |
| A_68_P30379760 | chr15:81641863-81641907                           | NM_017376:41      | Tef        | INSIDE                 | 1.573                                                        | 2.878                          | 884.23             | 2544.59            | 4.526                          | 802.40             | 3631.53            |
| A_68_P26143096 | chr8:109620241-109620285                          | NM_009353:183     | Terrf2     | INSIDE                 | 1.842                                                        | 7.143                          | 4769.95            | 34073.04           | 13.156                         | 3569.45            | 46958.07           |
| A_68_P24024083 | chr5:118478594-118478638                          | NM_021344:784     | Tesc       | INSIDE                 | 1.625                                                        | 4.891                          | 4373.06            | 21388.98           | 7.949                          | 3586.56            | 28509.15           |
| A_68_P26804662 | chr9:106587823-106587867                          | NM_011573:154     | Tex264     | INSIDE                 | 1.815                                                        | 2.861                          | 632.52             | 1809.56            | 5.192                          | 463.35             | 2405.94            |
| A_68_P26804666 | chr9:106588275-106588319                          | NM_001081654:-17  | Tex264     | PROMOTER               | 1.765                                                        | 2.185                          | 1727.76            | 3774.92            | 3.855                          | 1342.99            | 5177.58            |
| A_68_P30782600 | chr16:56717318-56717362                           | NM_019678:127     | Tfg        | INSIDE                 | 1.773                                                        | 2.471                          | 835.50             | 2064.67            | 4.382                          | 706.35             | 3094.87            |
| A_68_P24608765 | chr6:86145281-86145325                            | NM_031199:58      | Tgfa       | INSIDE                 | 2.011                                                        | 4.196                          | 265.89             | 1115.69            | 8.439                          | 229.08             | 1933.18            |
| A_68_P25011329 | chr7:26472470-26472514                            | NM_011577:472     | Tgfb1      | INSIDE                 | 1.819                                                        | 2.718                          | 5512.94            | 14984.39           | 4.943                          | 4060.73            | 20072.39           |
| A_68_P25011349 | chr7:26474463-26474507                            | NM_011577:2464    | Tgfb1      | INSIDE                 | 1.654                                                        | 4.639                          | 1133.34            | 5257.87            | 7.675                          | 964.32             | 7401.22            |
| A_68_P25011324 | chr7:26471878-26471922                            | NM_011577:-120    | Tgfb1      | PROMOTER               | 1.568                                                        | 2.535                          | 2686.22            | 6810.85            | 3.977                          | 2203.33            | 8762.21            |
| A_68_P29062337 | chr13:56710941-56710985                           | NM_009369:-1      | Tgfb1      | PROMOTER               | 1.526                                                        | 3.737                          | 5366.24            | 20054.80           | 5.704                          | 4386.93            | 25022.32           |
| A_68_P22894261 | chr4:47365847-47365891                            | NM_009370:-308    | Tgfb1      | PROMOTER               | 2.169                                                        | 5.306                          | 1036.17            | 5498.30            | 11.508                         | 847.24             | 9749.72            |
| A_68_P21773626 | chr2:156665615-156665659                          | NM_173396:-176    | Tgfi2      | PROMOTER               | 1.629                                                        | 4.810                          | 1506.49            | 7246.49            | 7.837                          | 1272.30            | 9971.61            |
| A_68_P23415826 | chr4:151363053-151363098                          | NM_001145929:20   | Thap3      | INSIDE                 | 1.604                                                        | 1.650                          | 491.30             | 810.45             | 2.646                          | 399.61             | 1057.32            |
| A_68_P20457301 | chr1:95651221-95651265                            | NM_025920:173     | Thap4      | INSIDE                 | 1.699                                                        | 10.560                         | 1017.56            | 10745.42           | 17.936                         | 928.45             | 16652.85           |
| A_68_P29418922 | chr14:14794169-14794213                           | NM_025435:-451    | Thoc7      | PROMOTER               | 1.598                                                        | 2.309                          | 2178.68            | 5030.69            | 3.690                          | 1673.07            | 6174.15            |
| A_68_P31931517 | chr19:5894108-5894152                             | NM_198634:-23     | Tigd3      | PROMOTER               | 1.502                                                        | 1.820                          | 1100.87            | 2003.78            | 2.734                          | 879.37             | 2403.95            |
| A_68_P30344883 | chr15:75740087-75740131                           | NM_178646:-56     | Tigd5      | DIVERGENT_PROMOTER     | 1.717                                                        | 4.105                          | 2199.15            | 9027.46            | 7.048                          | 1901.13            | 13399.69           |
| A_68_P32672454 | chrX:131076324-131076368                          | NM_013898:-178    | Timm8a1    | PROMOTER               | 1.633                                                        | 3.393                          | 810.91             | 2751.17            | 5.540                          | 428.52             | 2374.03            |
| A_68_P26581054 | chr9:64129658-64129702                            | NM_025372:267     | Tipin      | INSIDE                 | 1.784                                                        | 1.772                          | 3811.93            | 6754.17            | 3.161                          | 3116.88            | 9853.57            |
| A_68_P27290790 | chr10:81063642-81063689                           | NM_053254:-20     | Tle6       | DIVERGENT_PROMOTER     | 2.176                                                        | 4.811                          | 8247.25            | 39678.77           | 10.468                         | 6013.28            | 62949.87           |
| A_68_P25922763 | chr8:66684161-66684205                            | NM_009390:608     | Tll1       | INSIDE                 | 1.504                                                        | 2.938                          | 650.04             | 1910.15            | 4.418                          | 499.30             | 2205.96            |
| A_68_P24591236 | chr6:83018754-83018798                            | NM_009392:1443    | Tlx2       | INSIDE                 | 1.532                                                        | 2.775                          | 421.84             | 1170.68            | 4.251                          | 650.07             | 2763.26            |
| A_68_P27693341 | chr11:33101001-33101045                           | NM_019916:2566    | Tlx3       | INSIDE                 | 3.266                                                        | 11.424                         | 11521.46           | 131618.90          | 37.311                         | 7480.28            | 279095.00          |
| A_68_P27693355 | chr11:33102836-33102880                           | NM_019916:730     | Tlx3       | INSIDE                 | 2.123                                                        | 3.391                          | 1478.25            | 5012.70            | 7.199                          | 1172.83            | 8443.77            |
| A_68_P27693347 | chr11:33101808-33101852                           | NM_019916:1758    | Tlx3       | INSIDE                 | 1.876                                                        | 2.938                          | 673.36             | 1978.25            | 5.511                          | 549.92             | 3030.69            |
| A_68_P27693346 | chr11:33101716-33101763                           | NM_019916:1849    | Tlx3       | INSIDE                 | 1.717                                                        | 4.968                          | 736.97             | 3661.61            | 8.529                          | 543.56             | 4636.17            |
| A_68_P25724844 | chr8:26127584-26127628                            | NM_027194:-76     | Tm2d2      | DIVERGENT_PROMOTER     | 1.585                                                        | 3.211                          | 1452.58            | 4664.16            | 5.088                          | 1112.65            | 5661.61            |
| A_68_P29619050 | chr14:56262458-56262502                           | NM_028780:163     | Tm9sf1     | INSIDE                 | 3.144                                                        | 21.737                         | 4434.65            | 96395.99           | 68.347                         | 2167.49            | 148140.80          |
| A_68_P25459064 | chr7:125728226-125728270                          | NM_172476:-48     | Tmc7       | PROMOTER               | 1.534                                                        | 3.283                          | 1856.92            | 6095.49            | 5.036                          | 1642.42            | 8271.82            |
| A_68_P26713768 | chr9:89599588-89599632                            | NM_025360:271     | Tmed3      | INSIDE                 | 1.529                                                        | 1.959                          | 612.80             | 1200.66            | 2.995                          | 523.72             | 1568.54            |
| A_68_P28614745 | chr12:88540669-88540713                           | NM_001033475:489  | Tmed8      | INSIDE                 | 1.596                                                        | 5.480                          | 3474.84            | 19041.55           | 8.745                          | 2597.15            | 22713.11           |
| A_68_P26787844 | chr9:103663476-103663520                          | NM_178638:669     | Tmem108    | INSIDE                 | 1.680                                                        | 6.287                          | 1990.88            | 12516.72           | 10.564                         | 1533.51            | 16200.24           |
| A_68_P29508104 | chr14:31638725-31638769                           | NM_028839:-33     | Tmem110    | PROMOTER               | 1.630                                                        | 7.519                          | 1861.83            | 13998.85           | 12.256                         | 1443.88            | 17696.25           |
| A_68_P30453398 | chr15:94459261-94459305                           | NM_178789:-333    | Tmem117    | PROMOTER               | 1.751                                                        | 4.555                          | 9344.40            | 42566.47           | 7.978                          | 6963.78            | 55556.36           |
| A_68_P26289277 | chr9:7763854-7763898                              | NM_133739:-200    | Tmem123    | PROMOTER               | 1.557                                                        | 2.817                          | 10958.54           | 30867.54           | 4.385                          | 7497.56            | 32880.13           |
| A_68_P20151305 | chr1:36996651-36996695                            | NM_018872:-300    | Tmem131    | PROMOTER               | 1.596                                                        | 2.608                          | 1176.45            | 3067.66            | 4.162                          | 972.02             | 4045.50            |
| A_68_P27965917 | chr11:82200919-82200963                           | NM_023438:-1461   | Tmem132e   | PROMOTER               | 2.280                                                        | 7.265                          | 2269.87            | 16491.30           | 16.564                         | 1718.62            | 28467.81           |
| A_68_P27965931 | chr11:82202507-82202551                           | NM_023438:127     | Tmem132e   | INSIDE                 | 1.807                                                        | 5.438                          | 5787.76            | 31475.98           | 9.825                          | 4556.78            | 44770.51           |
| A_68_P27966238 | chr11:82248332-82248376                           | NM_023438:45953   | Tmem132e   | INSIDE                 | 1.666                                                        | 6.280                          | 392.39             | 2464.03            | 10.459                         | 334.54             | 3499.15            |
| A_68_P31921226 | chr19:4125896-4125940                             | NM_001078649:-41  | Tmem134    | DIVERGENT_PROMOTER     | 1.535                                                        | 1.599                          | 2143.89            | 3428.02            | 2.454                          | 1865.14            | 4577.64            |
| A_68_P31201735 | chr17:45686486-45686530                           | NM_001013749:118  | Tmem151b   | INSIDE                 | 1.921                                                        | 4.523                          | 4033.96            | 18243.61           | 8.688                          | 2866.15            | 24900.98           |
| A_68_P26894035 | chr9:123169998-123170042                          | NM_001002267:-113 | Tmem158    | PROMOTER               | 1.570                                                        | 5.235                          | 1322.39            | 6923.00            | 8.219                          | 1293.02            | 10627.22           |
| A_68_P26894026 | chr9:123168701-123168745                          | NM_001002267:1185 | Tmem158    | INSIDE                 | 1.561                                                        | 2.872                          | 2065.30            | 5931.81            | 4.485                          | 1627.76            | 7300.04            |
| A_68_P32709174 | chrX:139116023-139116067                          | NM_001199360:-224 | Tmem164    | PROMOTER               | 1.899                                                        | 4.862                          | 2349.83            | 11425.20           | 9.232                          | 1450.14            | 13387.17           |

| ProbeName      | Target position of probe on CpG island microarray | TargetID           | GeneSymbol | CpG island Description | Ratio of relative methylation (TiO <sub>2</sub> -NP/Vehicle) | Sham group                     |                    |                    | TiO <sub>2</sub> -H group      |                    |                    |
|----------------|---------------------------------------------------|--------------------|------------|------------------------|--------------------------------------------------------------|--------------------------------|--------------------|--------------------|--------------------------------|--------------------|--------------------|
|                |                                                   |                    |            |                        |                                                              | Relative methylation (Cy5/Cy3) | Cy3 signal (Input) | Cy5 signal (MeDIP) | Relative methylation (Cy5/Cy3) | Cy3 signal (Input) | Cy5 signal (MeDIP) |
| A_68_P22413373 | chr3:108365105-108365149                          | NM_026198:258      | Tmem167b   | INSIDE                 | 2.014                                                        | 5.899                          | 11035.30           | 65100.15           | 11.883                         | 7806.95            | 92767.71           |
| A_68_P31385967 | chr17:81344527-81344571                           | NM_026516:577      | Tmem178    | INSIDE                 | 1.739                                                        | 2.003                          | 790.27             | 1582.55            | 3.483                          | 671.56             | 2339.01            |
| A_68_P20632910 | chr1:136241239-136241283                          | NM_001042485:17316 | Tmem183a   | DOWNSTREAM             | 1.507                                                        | 1.589                          | 1960.62            | 3116.15            | 2.395                          | 1775.76            | 4253.73            |
| A_68_P30366260 | chr15:79233510-79233554                           | NM_172608:201      | Tmem184b   | INSIDE                 | 1.696                                                        | 2.289                          | 1282.09            | 2934.90            | 3.882                          | 1107.15            | 4297.46            |
| A_68_P30572936 | chr16:17276365-17276409                           | NM_177473:-6       | Tmem191c   | PROMOTER               | 2.406                                                        | 10.155                         | 1116.24            | 11334.84           | 24.427                         | 920.55             | 22486.71           |
| A_68_P25926494 | chr8:67471391-67471435                            | NM_001163747:329   | Tmem192    | INSIDE                 | 2.049                                                        | 1.823                          | 3191.17            | 5815.94            | 3.734                          | 2491.95            | 9305.58            |
| A_68_P32008156 | chr19:21853273-21853317                           | NM_001033759:463   | Tmem2      | INSIDE                 | 2.079                                                        | 7.297                          | 4595.47            | 33532.42           | 15.169                         | 3279.14            | 49740.42           |
| A_68_P23402215 | chr4:149111795-149111839                          | NM_001025106:327   | Tmem201    | INSIDE                 | 1.750                                                        | 6.996                          | 1464.17            | 10243.76           | 12.245                         | 1030.76            | 12621.58           |
| A_68_P26133052 | chr8:107850532-107850576                          | NM_025486:291      | Tmem208    | INSIDE                 | 1.617                                                        | 2.535                          | 7908.84            | 20050.59           | 4.099                          | 6297.19            | 25813.56           |
| A_68_P24304143 | chr6:24905716-24905760                            | NM_177013:387      | Tmem229a   | INSIDE                 | 1.538                                                        | 2.687                          | 1431.27            | 3845.77            | 4.133                          | 1315.59            | 5436.84            |
| A_68_P28567140 | chr12:80108151-80108195                           | NM_178745:92       | Tmem229b   | INSIDE                 | 2.358                                                        | 6.724                          | 9582.42            | 64433.40           | 15.858                         | 7192.83            | 114067.00          |
| A_68_P32557243 | chrX:97015613-97015657                            | NM_001081283:-773  | Tmem28     | PROMOTER               | 1.986                                                        | 2.695                          | 738.08             | 1989.24            | 5.353                          | 374.47             | 2004.59            |
| A_68_P25962148 | chr8:75095909-75095953                            | NM_144534:-71      | Tmem38a    | DIVERGENT_PROMOTER     | 2.027                                                        | 3.910                          | 3988.38            | 15596.27           | 7.928                          | 3405.73            | 27001.85           |
| A_68_P25962147 | chr8:75095836-75095880                            | NM_144534:-143     | Tmem38a    | DIVERGENT_PROMOTER     | 1.542                                                        | 2.800                          | 1226.51            | 3434.52            | 4.317                          | 1052.87            | 4545.69            |
| A_68_P23298058 | chr4:129373895-129373939                          | NM_199305:166      | Tmem39b    | INSIDE                 | 1.738                                                        | 2.740                          | 2790.29            | 7644.16            | 4.761                          | 2354.98            | 11212.01           |
| A_68_P23298057 | chr4:129373770-129373814                          | NM_199305:290      | Tmem39b    | INSIDE                 | 1.624                                                        | 1.711                          | 1592.30            | 2724.61            | 2.779                          | 1302.78            | 3620.70            |
| A_68_P25411125 | chr7:117129431-117129475                          | NM_153525:292      | Tmem41b    | INSIDE                 | 1.594                                                        | 2.631                          | 4442.00            | 11687.76           | 4.195                          | 3120.46            | 13091.02           |
| A_68_P30642387 | chr16:30550318-30550362                           | NM_172614:324      | Tmem44     | INSIDE                 | 1.547                                                        | 1.662                          | 2144.39            | 3563.03            | 2.571                          | 1758.73            | 4521.84            |
| A_68_P32488667 | chrX:78316560-78316604                            | NM_138751:600      | Tmem47     | INSIDE                 | 1.926                                                        | 4.390                          | 5758.30            | 25281.21           | 8.457                          | 3130.92            | 26478.88           |
| A_68_P32488661 | chrX:78315918-78315962                            | NM_138751:-42      | Tmem47     | PROMOTER               | 1.573                                                        | 2.978                          | 1549.11            | 4612.70            | 4.684                          | 1104.22            | 5171.91            |
| A_68_P23190148 | chr4:107040619-107040663                          | NM_028355:252      | Tmem48     | INSIDE                 | 1.913                                                        | 8.198                          | 1328.94            | 10894.72           | 15.684                         | 1001.80            | 15712.00           |
| A_68_P27507134 | chr10:121533967-121534011                         | NM_153059:170      | Tmem5      | INSIDE                 | 1.756                                                        | 2.901                          | 22532.79           | 65360.53           | 5.093                          | 17904.44           | 91188.08           |
| A_68_P23294938 | chr4:128782726-128782770                          | NM_025452:-25      | Tmem54     | PROMOTER               | 1.536                                                        | 4.533                          | 3146.01            | 14260.84           | 6.964                          | 2437.77            | 16975.62           |
| A_68_P23294939 | chr4:128782828-128782872                          | NM_025452:77       | Tmem54     | INSIDE                 | 1.525                                                        | 2.730                          | 3022.03            | 8250.80            | 4.163                          | 2406.60            | 10019.09           |
| A_68_P29599187 | chr14:51550282-51550326                           | NM_001033271:220   | Tmem55b    | INSIDE                 | 1.740                                                        | 8.543                          | 1131.21            | 9664.49            | 14.870                         | 707.37             | 10518.48           |
| A_68_P29599189 | chr14:51550570-51550614                           | NM_001033271:-68   | Tmem55b    | PROMOTER               | 1.728                                                        | 6.256                          | 6967.38            | 43587.79           | 10.809                         | 5207.44            | 56284.93           |
| A_68_P22475542 | chr3:120966000-120966044                          | NM_178936:212      | Tmem56     | INSIDE                 | 1.675                                                        | 2.106                          | 842.69             | 1774.56            | 3.527                          | 788.56             | 2781.43            |
| A_68_P22475538 | chr3:120965447-120965491                          | NM_178936:766      | Tmem56     | INSIDE                 | 1.629                                                        | 3.110                          | 1198.08            | 3726.36            | 5.068                          | 1119.74            | 5674.32            |
| A_68_P25588178 | chr7:148514084-148514128                          | NR_024509:78       | Tmem80     | INSIDE                 | 1.587                                                        | 2.664                          | 2355.48            | 6275.28            | 4.228                          | 1974.60            | 8349.00            |
| A_68_P21736747 | chr2:149656520-149656564                          | NM_001085521:24    | Tmem90b    | INSIDE                 | 2.019                                                        | 14.996                         | 3615.40            | 54215.89           | 30.269                         | 2609.57            | 78989.27           |
| A_68_P22886521 | chr4:46051942-46051986                            | NM_021883:-129     | Tmod1      | PROMOTER               | 1.530                                                        | 2.741                          | 2565.11            | 7031.71            | 4.195                          | 2101.39            | 8815.76            |
| A_68_P29964713 | chr14:123381923-123381967                         | NM_028651:539      | Tmte4      | INSIDE                 | 1.561                                                        | 5.108                          | 1203.79            | 6149.55            | 7.972                          | 922.30             | 7352.89            |
| A_68_P29964714 | chr14:123382020-123382064                         | NM_028651:441      | Tmte4      | INSIDE                 | 1.543                                                        | 3.639                          | 289.34             | 1053.04            | 5.616                          | 247.28             | 1388.75            |
| A_68_P23541913 | chr5:23953475-23953519                            | NM_022418:168      | Tmub1      | INSIDE                 | 1.550                                                        | 2.442                          | 1120.23            | 2736.03            | 3.785                          | 956.45             | 3620.14            |
| A_68_P28520555 | chr12:71554358-71554402                           | NM_028339:240      | Tmx1       | INSIDE                 | 1.517                                                        | 1.462                          | 1187.01            | 1735.79            | 2.218                          | 1077.70            | 2390.47            |
| A_68_P22973925 | chr4:63678841-63678885                            | NM_011607:29187    | Tnc        | INSIDE                 | 2.532                                                        | 7.689                          | 1740.85            | 13385.58           | 19.465                         | 1214.65            | 23643.61           |
| A_68_P31187135 | chr17:43153738-43153782                           | NM_178589:257      | Tnfrsf21   | INSIDE                 | 1.628                                                        | 4.557                          | 2213.00            | 10085.59           | 7.421                          | 1633.92            | 12124.77           |
| A_68_P29745018 | chr14:78707731-78707775                           | NM_011613:98       | Tnfsf11    | INSIDE                 | 1.552                                                        | 3.653                          | 2008.53            | 7338.06            | 5.671                          | 1580.84            | 8964.18            |
| A_68_P22015873 | chr3:28161770-28161814                            | NM_001163009:-343  | Tnik       | PROMOTER               | 1.744                                                        | 3.559                          | 324.25             | 1153.94            | 6.206                          | 261.68             | 1623.89            |
| A_68_P25777211 | chr8:36028290-36028334                            | NM_175091:432      | Tnks       | INSIDE                 | 1.503                                                        | 3.928                          | 823.33             | 3233.88            | 5.903                          | 639.69             | 3775.94            |
| A_68_P24153558 | chr5:143580250-143580294                          | NM_001122730:-1206 | Tnrc18     | PROMOTER               | 1.865                                                        | 3.080                          | 1012.96            | 3120.38            | 5.746                          | 755.98             | 4343.72            |
| A_68_P30374043 | chr15:80542551-80542595                           | NM_144812:830      | Tnrc6b     | INSIDE                 | 2.901                                                        | 10.575                         | 3462.10            | 36612.34           | 30.679                         | 2420.22            | 74249.83           |
| A_68_P28166383 | chr11:117515888-117515933                         | NM_198022:308      | Tnrc6c     | INSIDE                 | 1.761                                                        | 3.753                          | 1659.74            | 6229.66            | 6.610                          | 1320.71            | 8729.71            |
| A_68_P20345418 | chr1:73954077-73954121                            | NM_027884:216923   | Tns1       | DOWNSTREAM             | 1.662                                                        | 4.095                          | 1102.23            | 4514.15            | 6.807                          | 870.43             | 5925.32            |
| A_68_P27579284 | chr11:8564125-8564169                             | NM_001083587:392   | Tns3       | INSIDE                 | 2.088                                                        | 6.420                          | 1932.44            | 12405.84           | 13.402                         | 1474.21            | 19757.56           |
| A_68_P30380067 | chr15:81688792-81688836                           | NM_020507:-58      | Tob2       | PROMOTER               | 1.902                                                        | 4.656                          | 2525.26            | 11757.26           | 8.854                          | 1887.14            | 16709.04           |
| A_68_P30784285 | chr16:57122018-57122062                           | NM_138599:214      | Tomm70a    | INSIDE                 | 2.470                                                        | 9.905                          | 4797.46            | 47520.59           | 24.470                         | 3311.14            | 81023.28           |

| ProbeName      | Target position of probe on CpG island microarray | TargetID           | GeneSymbol | CpG island Description | Ratio of relative methylation (TiO <sub>2</sub> -NP/Vehicle) | Sham group                     |                    |                    | TiO <sub>2</sub> -H group      |                    |                    |
|----------------|---------------------------------------------------|--------------------|------------|------------------------|--------------------------------------------------------------|--------------------------------|--------------------|--------------------|--------------------------------|--------------------|--------------------|
|                |                                                   |                    |            |                        |                                                              | Relative methylation (Cy5/Cy3) | Cy3 signal (Input) | Cy5 signal (MeDIP) | Relative methylation (Cy5/Cy3) | Cy3 signal (Input) | Cy5 signal (MeDIP) |
| A_68_P30349539 | chr15:76462358-76462402                           | NM_183091:7979     | Tonsl      | INSIDE                 | 1.799                                                        | 6.542                          | 8551.76            | 55942.93           | 11.767                         | 6017.12            | 70801.82           |
| A_68_P29428731 | chr14:17197979-17198023                           | NM_009409:281      | Top2b      | INSIDE                 | 1.749                                                        | 2.011                          | 1529.45            | 3075.09            | 3.516                          | 1246.60            | 4382.69            |
| A_68_P21117289 | chr2:32612990-32613034                            | NM_152800:222      | Tor2a      | INSIDE                 | 1.896                                                        | 6.493                          | 1602.39            | 10403.93           | 12.309                         | 1213.79            | 14940.74           |
| A_68_P21117286 | chr2:32612762-32612806                            | NM_152800:-6       | Tor2a      | PROMOTER               | 1.855                                                        | 3.906                          | 1786.12            | 6976.17            | 7.247                          | 1455.65            | 10548.40           |
| A_68_P22708703 | chr4:6917953-6917997                              | NM_145711:-104     | Tox        | PROMOTER               | 1.725                                                        | 3.353                          | 5320.50            | 17841.79           | 5.786                          | 4525.23            | 26181.49           |
| A_68_P21910960 | chr2:181231996-181232040                          | NM_025482:61       | Tpd52l2    | INSIDE                 | 1.588                                                        | 2.405                          | 810.93             | 1950.67            | 3.820                          | 706.07             | 2696.99            |
| A_68_P22872185 | chr4:43536399-43536443                            | NM_009416:-160     | Tpm2       | PROMOTER               | 1.600                                                        | 2.434                          | 1937.75            | 4715.58            | 3.894                          | 1520.65            | 5921.09            |
| A_68_P20191548 | chr1:43991025-43991069                            | NM_009418:195      | Tpp2       | INSIDE                 | 1.567                                                        | 4.232                          | 826.31             | 3496.70            | 6.632                          | 684.81             | 4541.32            |
| A_68_P29143670 | chr13:74147870-74147914                           | NM_182839:1026     | Tppp       | INSIDE                 | 1.560                                                        | 3.518                          | 1149.79            | 4045.47            | 5.489                          | 940.34             | 5161.41            |
| A_68_P26134000 | chr8:107995392-107995436                          | NM_026481:-92      | Tppp3      | PROMOTER               | 1.666                                                        | 4.999                          | 3639.91            | 18195.52           | 8.330                          | 2948.59            | 24560.81           |
| A_68_P30596851 | chr16:22265603-22265647                           | NM_009186:378      | Tra2b      | INSIDE                 | 2.031                                                        | 3.657                          | 723.92             | 2647.65            | 7.430                          | 568.60             | 4224.62            |
| A_68_P22492339 | chr3:124023918-124023962                          | NM_146140:-154     | Tram111    | PROMOTER               | 1.550                                                        | 1.883                          | 1710.74            | 3222.01            | 2.919                          | 1366.00            | 3986.99            |
| A_68_P26234573 | chr8:125135855-125135899                          | NM_021502:31       | Trappe2l   | INSIDE                 | 1.589                                                        | 2.915                          | 1854.83            | 5407.17            | 4.632                          | 1334.71            | 6182.19            |
| A_68_P30255506 | chr15:59479250-59479294                           | NM_144549:-936     | Trib1      | PROMOTER               | 2.036                                                        | 6.079                          | 9403.85            | 57161.85           | 12.376                         | 6351.70            | 78609.39           |
| A_68_P30255510 | chr15:59479785-59479829                           | NM_144549:-402     | Trib1      | PROMOTER               | 1.521                                                        | 2.815                          | 1344.26            | 3784.38            | 4.282                          | 1178.22            | 5044.74            |
| A_68_P30255512 | chr15:59479961-59480005                           | NM_144549:-226     | Trib1      | PROMOTER               | 1.502                                                        | 2.370                          | 2851.21            | 6758.58            | 3.560                          | 2415.27            | 8599.13            |
| A_68_P24459338 | chr6:53768811-53768855                            | NM_025817:1987     | Tril       | INSIDE                 | 1.951                                                        | 6.346                          | 4390.67            | 27862.05           | 12.382                         | 3566.54            | 44159.98           |
| A_68_P28871505 | chr13:21272743-21272787                           | NM_009054:937      | Trim27     | INSIDE                 | 1.862                                                        | 3.993                          | 1642.00            | 6556.20            | 7.435                          | 1345.09            | 10000.14           |
| A_68_P28871497 | chr13:21271956-21272000                           | NM_009054:151      | Trim27     | INSIDE                 | 1.509                                                        | 1.526                          | 771.34             | 1177.15            | 2.304                          | 742.76             | 1710.95            |
| A_68_P31675573 | chr18:46358367-46358411                           | NM_001170855:84    | Trim36     | INSIDE                 | 1.795                                                        | 2.018                          | 1190.25            | 2402.41            | 3.623                          | 1052.42            | 3813.30            |
| A_68_P31675568 | chr18:46357840-46357884                           | NM_001170855:610   | Trim36     | INSIDE                 | 1.561                                                        | 2.855                          | 486.55             | 1389.25            | 4.458                          | 453.71             | 2022.68            |
| A_68_P28157432 | chr11:115970917-115970961                         | NM_001205081:611   | Trim47     | INSIDE                 | 1.682                                                        | 5.953                          | 1398.78            | 8326.68            | 10.014                         | 1042.65            | 10441.36           |
| A_68_P28157433 | chr11:115971055-115971099                         | NM_001205081:473   | Trim47     | INSIDE                 | 1.574                                                        | 7.514                          | 4631.18            | 34796.67           | 11.828                         | 3674.12            | 43458.28           |
| A_68_P26247734 | chr8:127317918-127317962                          | NM_198632:1022     | Trim67     | INSIDE                 | 2.219                                                        | 5.090                          | 4707.86            | 23962.96           | 11.297                         | 3622.37            | 40921.94           |
| A_68_P26845381 | chr9:114473232-114473276                          | NM_001042503:233   | Trim71     | INSIDE                 | 2.604                                                        | 6.462                          | 664.84             | 4295.91            | 16.825                         | 520.90             | 8764.06            |
| A_68_P30096385 | chr15:27954397-27954441                           | NM_001081302:1185  | Trio       | INSIDE                 | 1.750                                                        | 1.463                          | 4319.80            | 6321.36            | 2.561                          | 3326.99            | 8521.62            |
| A_68_P30363493 | chr15:78798329-78798373                           | NM_001039155:20197 | Triobp     | INSIDE                 | 1.982                                                        | 11.133                         | 1510.57            | 16816.93           | 22.062                         | 976.39             | 21540.76           |
| A_68_P30363492 | chr15:78798174-78798218                           | NM_001039155:20043 | Triobp     | INSIDE                 | 1.531                                                        | 4.304                          | 3043.35            | 13098.90           | 6.588                          | 2143.46            | 14121.76           |
| A_68_P28688419 | chr12:103150855-103150899                         | NM_028446:505      | Trip11     | INSIDE                 | 2.414                                                        | 4.319                          | 6889.77            | 29759.31           | 10.425                         | 5098.42            | 53151.19           |
| A_68_P23429319 | chr4:153514065-153514109                          | NM_011642:231      | Trp73      | INSIDE                 | 1.625                                                        | 4.438                          | 1760.55            | 7813.59            | 7.211                          | 1637.29            | 11805.84           |
| A_68_P21767078 | chr2:155518080-155518124                          | NM_001163452:18    | Trpe4ap    | INSIDE                 | 2.112                                                        | 3.247                          | 805.77             | 2616.47            | 6.857                          | 678.22             | 4650.51            |
| A_68_P26292118 | chr9:8544562-8544606                              | NM_013838:443      | Trpc6      | INSIDE                 | 2.466                                                        | 3.342                          | 924.53             | 3089.86            | 8.241                          | 744.87             | 6138.87            |
| A_68_P32010020 | chr19:22213374-22213418                           | NM_001035239:-210  | Trpm3      | PROMOTER               | 1.597                                                        | 2.658                          | 1036.70            | 2755.98            | 4.245                          | 859.73             | 3649.29            |
| A_68_P24162469 | chr5:145529670-145529714                          | NM_001081362:32    | Trrap      | INSIDE                 | 1.637                                                        | 2.912                          | 5153.75            | 15010.24           | 4.768                          | 3947.39            | 18822.66           |
| A_68_P31098616 | chr17:24769435-24769479                           | NM_001039363:118   | Tsc2       | INSIDE                 | 1.589                                                        | 1.349                          | 4463.30            | 6019.95            | 2.143                          | 3751.78            | 8041.93            |
| A_68_P29733553 | chr14:76816095-76816139                           | NM_207652:489      | Tsc22d1    | INSIDE                 | 1.725                                                        | 3.435                          | 3654.98            | 12555.67           | 5.926                          | 2628.47            | 15576.82           |
| A_68_P32700067 | chrX:137134400-137134444                          | NM_001077364:639   | Tsc22d3    | INSIDE                 | 1.525                                                        | 2.951                          | 4716.72            | 13920.73           | 4.500                          | 2959.65            | 13317.83           |
| A_68_P24771681 | chr6:115494875-115494919                          | NM_199033:175      | Tsen2      | INSIDE                 | 1.820                                                        | 7.577                          | 2438.08            | 18473.32           | 13.787                         | 1654.35            | 22808.57           |
| A_68_P25102011 | chr7:54175094-54175138                            | NM_021884:184      | Tsg101     | INSIDE                 | 1.710                                                        | 3.474                          | 1126.98            | 3915.36            | 5.942                          | 917.98             | 5454.39            |
| A_68_P20156316 | chr13:37922113-37922157                           | NM_207228:-210     | Tsga10     | DIVERGENT_PROMOTER     | 1.586                                                        | 1.464                          | 728.86             | 1066.79            | 2.321                          | 599.54             | 1391.72            |
| A_68_P25056449 | chr7:37481732-37481776                            | NM_172298:-1382    | Tshz3      | PROMOTER               | 2.179                                                        | 4.522                          | 6942.59            | 31394.05           | 9.853                          | 5384.81            | 53058.30           |
| A_68_P25056451 | chr7:37481970-37482014                            | NM_172298:-1144    | Tshz3      | PROMOTER               | 1.556                                                        | 2.088                          | 1067.78            | 2229.64            | 3.249                          | 934.35             | 3035.37            |
| A_68_P29560590 | chr14:41779806-41779850                           | NM_145928:268      | Tspan14    | INSIDE                 | 1.852                                                        | 3.937                          | 6353.90            | 25015.85           | 7.292                          | 5038.57            | 36742.06           |
| A_68_P29051405 | chr13:54890823-54890867                           | NM_028841:79       | Tspan17    | INSIDE                 | 1.881                                                        | 3.452                          | 458.95             | 1584.22            | 6.494                          | 329.33             | 2138.76            |
| A_68_P22382656 | chr3:102538778-102538822                          | NM_027533:108      | Tspan2     | INSIDE                 | 1.897                                                        | 4.171                          | 9887.21            | 41239.90           | 7.911                          | 7434.75            | 58815.90           |
| A_68_P22570418 | chr3:138405498-138405542                          | NM_019571:362      | Tspan5     | INSIDE                 | 1.680                                                        | 4.376                          | 1624.13            | 7106.38            | 7.351                          | 1326.85            | 9753.60            |
| A_68_P32749012 | chrX:148777026-148777070                          | NM_029836:-21      | Tspsy12    | PROMOTER               | 2.020                                                        | 6.415                          | 31502.22           | 202084.40          | 12.961                         | 19139.72           | 248069.50          |

| ProbeName       | Target position of probe on CpG island microarray | TargetID           | GeneSymbol | CpG island Description | Ratio of relative methylation (TiO <sub>2</sub> -NP/Vehicle) | Sham group                     |                    |                    | TiO <sub>2</sub> -H group      |                    |                    |
|-----------------|---------------------------------------------------|--------------------|------------|------------------------|--------------------------------------------------------------|--------------------------------|--------------------|--------------------|--------------------------------|--------------------|--------------------|
|                 |                                                   |                    |            |                        |                                                              | Relative methylation (Cy5/Cy3) | Cy3 signal (Input) | Cy5 signal (MeDIP) | Relative methylation (Cy5/Cy3) | Cy3 signal (Input) | Cy5 signal (MeDIP) |
| A_68_P23982393  | chr5:111308521-111308565                          | NM_024477:-279     | Ttc28      | PROMOTER               | 1.724                                                        | 6.433                          | 286.30             | 1841.66            | 11.088                         | 176.30             | 1954.72            |
| A_68_P23982396  | chr5:111309011-111309055                          | NM_024477:211      | Ttc28      | INSIDE                 | 1.676                                                        | 4.893                          | 6002.93            | 29374.08           | 8.200                          | 4758.82            | 39022.67           |
| A_68_P30176273  | chr15:43308698-43308742                           | NM_025736:-54      | Ttc35      | PROMOTER               | 1.857                                                        | 2.199                          | 1903.70            | 4185.70            | 4.083                          | 1443.41            | 5892.75            |
| A_68_P30176277  | chr15:43309087-43309131                           | NM_025736:334      | Ttc35      | INSIDE                 | 1.552                                                        | 2.774                          | 2444.85            | 6782.67            | 4.306                          | 2147.63            | 9247.83            |
| A_68_P31422209  | chr17:87682307-87682351                           | NM_028639:103      | Ttc7       | INSIDE                 | 2.100                                                        | 3.330                          | 695.26             | 2315.04            | 6.993                          | 552.07             | 3860.37            |
| A_68_P21622816  | chr2:128891587-128891631                          | NM_027192:-74      | Ttl        | PROMOTER               | 1.596                                                        | 4.591                          | 2434.91            | 11177.48           | 7.325                          | 1775.89            | 13008.52           |
| A_68_P28606270  | chr12:87166109-87166153                           | NM_001081423:231   | Ttll5      | INSIDE                 | 2.203                                                        | 1.934                          | 783.80             | 1515.98            | 4.262                          | 601.72             | 2564.47            |
| A_68_P28149093  | chr11:114536801-114536845                         | NM_053273:41       | Ttyh2      | INSIDE                 | 1.586                                                        | 5.212                          | 2080.39            | 10842.37           | 8.265                          | 1728.79            | 14288.31           |
| A_68_P21070656  | chr2:25080752-25080796                            | NM_146116:-552     | Tubb2c     | PROMOTER               | 1.976                                                        | 4.220                          | 2765.86            | 11672.93           | 8.339                          | 2234.63            | 18633.69           |
| A_68_P31791603  | chr18:67550248-67550292                           | NM_026473:-114     | Tubb6      | PROMOTER               | 1.833                                                        | 2.112                          | 1364.48            | 2881.84            | 3.872                          | 1120.72            | 4339.74            |
| A_68_P25798746  | chr8:40068990-40069034                            | NM_030254:92       | Tuse3      | INSIDE                 | 1.691                                                        | 3.748                          | 1215.15            | 4554.28            | 6.337                          | 912.00             | 5779.74            |
| A_68_P28344356  | chr12:34642925-34642969                           | NM_011658:411      | Twist1     | INSIDE                 | 1.540                                                        | 1.644                          | 423.44             | 696.13             | 2.532                          | 392.98             | 995.14             |
| A_68_P23297754  | chr4:129318346-129318390                          | NM_001199695:-59   | Txlina     | PROMOTER               | 1.557                                                        | 2.710                          | 1619.38            | 4388.83            | 4.220                          | 1351.27            | 5701.81            |
| A_68_P22948244  | chr4:57969284-57969328                            | NM_011660:-23      | Txn1       | PROMOTER               | 1.595                                                        | 3.002                          | 664.99             | 1996.03            | 4.788                          | 619.35             | 2965.60            |
| A_68_P21571594  | chr2:119625143-119625187                          | NM_019392:-85      | Tyro3      | PROMOTER               | 2.071                                                        | 8.860                          | 3983.38            | 35291.72           | 18.347                         | 3170.68            | 58172.74           |
| A_68_P27181843  | chr10:61158699-61158743                           | NM_027912:459      | Tysnd1     | INSIDE                 | 1.616                                                        | 3.373                          | 978.98             | 3301.84            | 5.452                          | 761.99             | 4154.37            |
| A_68_P24951859  | chr7:5012645-5012689                              | NM_001205231:-1078 | U2af2      | PROMOTER               | 1.555                                                        | 1.754                          | 3975.91            | 6972.82            | 2.727                          | 2829.09            | 7714.78            |
| A_68_P25042532  | chr7:34953588-34953632                            | NM_016682:-62      | Uba2       | PROMOTER               | 1.664                                                        | 13.458                         | 665.13             | 8951.22            | 22.398                         | 588.62             | 13184.03           |
| A_68_P24671729  | chr6:97155626-97155670                            | NM_001111106:-12   | Uba3       | DIVERGENT_PROMOTER     | 1.837                                                        | 4.483                          | 7712.25            | 34570.24           | 8.234                          | 5398.68            | 44452.74           |
| A_68_P21075771  | chr2:25877080-25877124                            | NM_133835:178      | Ubac1      | INSIDE                 | 1.718                                                        | 3.692                          | 611.91             | 2259.37            | 6.342                          | 595.33             | 3775.64            |
| A_68_P29958338  | chr14:122278102-122278146                         | NM_026861:297      | Ubac2      | INSIDE                 | 2.334                                                        | 4.232                          | 2780.86            | 11768.46           | 9.877                          | 2012.80            | 19879.47           |
| A_68_P29958335  | chr14:122277673-122277717                         | NM_026861:-133     | Ubac2      | PROMOTER               | 2.099                                                        | 1.758                          | 1369.19            | 2407.09            | 3.691                          | 1136.02            | 4192.80            |
| A_68_P223232188 | chr3:89856392-89856436                            | NM_028475:-17      | Ubp2l1     | PROMOTER               | 1.626                                                        | 1.802                          | 9446.78            | 17020.32           | 2.929                          | 6798.45            | 19913.72           |
| A_68_P32320545  | chrX:34415031-34415075                            | NM_019668:692      | Ube2a      | INSIDE                 | 2.025                                                        | 3.110                          | 1464.24            | 4554.02            | 6.297                          | 822.03             | 5176.49            |
| A_68_P21819631  | chr2:164595113-164595157                          | NM_026785:-294     | Ube2c      | PROMOTER               | 1.949                                                        | 1.547                          | 2320.10            | 3588.52            | 3.015                          | 1901.78            | 5734.30            |
| A_68_P27234632  | chr10:70747404-70747448                           | NM_145420:584      | Ube2d1     | INSIDE                 | 1.723                                                        | 4.515                          | 3345.42            | 15106.07           | 7.781                          | 2432.05            | 18923.28           |
| A_68_P27912376  | chr11:72420588-72420632                           | NM_025985:-152     | Ube2g1     | PROMOTER               | 1.630                                                        | 3.721                          | 980.28             | 3647.77            | 6.065                          | 904.63             | 5486.35            |
| A_68_P28159934  | chr11:116403055-116403099                         | NM_173755:39685    | Ube2o      | INSIDE                 | 1.780                                                        | 3.415                          | 1066.32            | 3641.22            | 6.080                          | 893.63             | 5433.21            |
| A_68_P28160203  | chr11:116442887-116442931                         | NM_173755:-147     | Ube2o      | PROMOTER               | 1.575                                                        | 2.804                          | 3375.46            | 9466.43            | 4.418                          | 2808.59            | 12408.08           |
| A_68_P22321608  | chr3:89577074-89577118                            | NM_027315:-434     | Ube2q1     | DIVERGENT_PROMOTER     | 1.517                                                        | 1.749                          | 2102.20            | 3677.00            | 2.653                          | 1641.16            | 4353.86            |
| A_68_P26529572  | chr9:54997117-54997161                            | NM_180600:-37      | Ube2q2     | PROMOTER               | 2.656                                                        | 11.264                         | 2664.79            | 30016.69           | 29.913                         | 1875.82            | 56110.90           |
| A_68_P26529571  | chr9:54996925-54996969                            | NM_180600:-229     | Ube2q2     | PROMOTER               | 1.914                                                        | 7.210                          | 1010.45            | 7285.18            | 13.799                         | 790.60             | 10909.70           |
| A_68_P29117519  | chr13:69878102-69878146                           | NM_001145162:651   | Ube2q11    | INSIDE                 | 1.721                                                        | 3.906                          | 4725.31            | 18459.07           | 6.724                          | 3879.84            | 26087.56           |
| A_68_P29117527  | chr13:69878894-69878938                           | NM_001145162:-141  | Ube2q11    | PROMOTER               | 1.831                                                        | 1.454                          | 759.42             | 1103.94            | 2.661                          | 644.53             | 1715.34            |
| A_68_P22860680  | chr4:41082241-41082285                            | NM_026275:-791     | Ube2r2     | PROMOTER               | 1.629                                                        | 1.364                          | 2700.44            | 3684.57            | 2.222                          | 2131.24            | 4735.93            |
| A_68_P21836350  | chr2:167423298-167423342                          | NM_023230:34185    | Ube2v1     | DOWNSTREAM             | 2.559                                                        | 1.736                          | 6057.44            | 10517.36           | 4.443                          | 3948.40            | 17542.62           |
| A_68_P21836569  | chr2:167457610-167457654                          | NM_023230:-127     | Ube2v1     | PROMOTER               | 1.633                                                        | 3.680                          | 822.83             | 3028.11            | 6.008                          | 636.44             | 3824.00            |
| A_68_P23568207  | chr5:29896110-29896154                            | NM_133907:351      | Ube3c      | INSIDE                 | 1.512                                                        | 2.739                          | 1584.16            | 4339.25            | 4.140                          | 1228.08            | 5084.59            |
| A_68_P25477108  | chr7:129210764-129210808                          | NM_138589:75       | Ubf1d1     | INSIDE                 | 1.622                                                        | 5.308                          | 1922.64            | 10205.63           | 8.608                          | 1580.94            | 13609.45           |
| A_68_P32467744  | chrX:71613927-71613971                            | NM_145405:-82      | Ubl4       | PROMOTER               | 1.663                                                        | 3.501                          | 1792.31            | 6275.29            | 5.822                          | 1302.37            | 7581.90            |
| A_68_P21311589  | chr2:69735872-69735916                            | NM_001081548:592   | Ubr3       | INSIDE                 | 1.552                                                        | 2.467                          | 2694.52            | 6646.05            | 3.829                          | 2134.09            | 8170.82            |
| A_68_P32118295  | chr19:42056730-42056774                           | NM_145500:500      | Ubt1       | INSIDE                 | 1.886                                                        | 6.127                          | 949.72             | 5818.85            | 11.553                         | 816.00             | 9427.02            |
| A_68_P27688946  | chr11:32355594-32355638                           | NM_173784:245      | Ubt2       | INSIDE                 | 2.445                                                        | 5.514                          | 5760.64            | 31763.89           | 13.479                         | 4170.34            | 56213.19           |
| A_68_P28078909  | chr11:102180488-102180532                         | NM_011551:-100     | Ubt1       | PROMOTER               | 1.826                                                        | 2.132                          | 552.33             | 1177.68            | 3.893                          | 399.39             | 1554.76            |
| A_68_P20599489  | chr1:130140741-130140785                          | NM_026390:5        | Ubxn4      | INSIDE                 | 2.077                                                        | 1.596                          | 867.00             | 1383.46            | 3.314                          | 766.74             | 2541.27            |
| A_68_P20821183  | chr1:172145120-172145164                          | NM_010633:382      | Uhmk1      | INSIDE                 | 1.643                                                        | 1.951                          | 1817.60            | 3545.33            | 3.204                          | 1568.10            | 5024.87            |
| A_68_P27332821  | chr10:89207726-89207770                           | NM_029166:13       | Uhrf1bp11  | INSIDE                 | 2.154                                                        | 3.424                          | 2654.20            | 9088.83            | 7.375                          | 2280.54            | 16819.81           |

| ProbeName      | Target position of probe on CpG island microarray | TargetID           | GeneSymbol | CpG island Description | Ratio of relative methylation (TiO <sub>2</sub> -NP/Vehicle) | Sham group                     |                    |                    | TiO <sub>2</sub> -H group      |                    |                    |
|----------------|---------------------------------------------------|--------------------|------------|------------------------|--------------------------------------------------------------|--------------------------------|--------------------|--------------------|--------------------------------|--------------------|--------------------|
|                |                                                   |                    |            |                        |                                                              | Relative methylation (Cy5/Cy3) | Cy3 signal (Input) | Cy5 signal (MeDIP) | Relative methylation (Cy5/Cy3) | Cy3 signal (Input) | Cy5 signal (MeDIP) |
| A_68_P32056099 | chr19:30105106-30105150                           | NM_144873:126      | Uhrf2      | INSIDE                 | 2.097                                                        | 6.089                          | 1920.53            | 11693.79           | 12.766                         | 1554.80            | 19847.81           |
| A_68_P27850822 | chr11:61668093-61668137                           | NM_013881:480      | Ulk2       | INSIDE                 | 2.241                                                        | 12.017                         | 5428.39            | 65234.44           | 26.936                         | 3559.78            | 95885.15           |
| A_68_P27850828 | chr11:61668703-61668747                           | NM_013881:-130     | Ulk2       | PROMOTER               | 1.866                                                        | 9.965                          | 2530.43            | 25216.61           | 18.596                         | 1822.22            | 33886.04           |
| A_68_P27942762 | chr11:78157060-78157104                           | NM_011676:59       | Unc119     | INSIDE                 | 1.644                                                        | 4.324                          | 5863.68            | 25357.28           | 7.109                          | 4592.37            | 32645.92           |
| A_68_P25958205 | chr8:74195695-74195739                            | NM_001029873:-60   | Unc13a     | DIVERGENT_PROMOTER     | 1.748                                                        | 3.016                          | 8338.50            | 25152.77           | 5.272                          | 6293.49            | 33177.18           |
| A_68_P27177056 | chr10:60293675-60293719                           | NM_029770:633      | Unc5b      | INSIDE                 | 1.989                                                        | 3.673                          | 1451.34            | 5330.04            | 7.303                          | 1228.29            | 8970.39            |
| A_68_P27177053 | chr10:60293340-60293384                           | NM_029770:967      | Unc5b      | INSIDE                 | 1.681                                                        | 2.249                          | 1672.25            | 3760.27            | 3.780                          | 1433.56            | 5418.84            |
| A_68_P25747455 | chr8:30329725-30329769                            | NM_153135:362      | Unc5d      | INSIDE                 | 2.094                                                        | 7.058                          | 8318.20            | 58706.24           | 14.778                         | 6527.83            | 96467.42           |
| A_68_P20303908 | chr1:66724124-66724168                            | NM_175510:209126   | Unc80      | INSIDE                 | 2.192                                                        | 12.767                         | 15968.88           | 203869.80          | 27.990                         | 10327.29           | 289058.50          |
| A_68_P24136157 | chr5:140020297-140020341                          | NM_013702:467      | Uncx       | INSIDE                 | 1.526                                                        | 3.136                          | 2512.84            | 7880.53            | 4.786                          | 2233.60            | 10689.77           |
| A_68_P28156930 | chr11:115891653-115891697                         | NM_172569:39       | Unk        | INSIDE                 | 1.982                                                        | 3.224                          | 656.27             | 2115.97            | 6.391                          | 542.34             | 3466.17            |
| A_68_P25951334 | chr8:72877112-72877156                            | NM_001122829:38    | Upf1       | INSIDE                 | 1.535                                                        | 4.103                          | 1615.14            | 6627.05            | 6.300                          | 1315.38            | 8287.26            |
| A_68_P25670554 | chr8:13785750-13785794                            | NM_025924:158      | Upf3a      | INSIDE                 | 1.571                                                        | 3.934                          | 1989.76            | 7828.20            | 6.182                          | 1622.32            | 10028.85           |
| A_68_P25670559 | chr8:13786249-13786293                            | NM_025924:656      | Upf3a      | INSIDE                 | 1.531                                                        | 1.530                          | 2669.49            | 4083.41            | 2.342                          | 2133.74            | 4998.14            |
| A_68_P25670551 | chr8:13785477-13785521                            | NM_025924:-116     | Upf3a      | PROMOTER               | 2.006                                                        | 1.435                          | 1349.51            | 1936.78            | 2.880                          | 977.43             | 2814.58            |
| A_68_P21768463 | chr2:155755683-155755727                          | NM_018888:342      | Uqcc       | INSIDE                 | 1.743                                                        | 3.108                          | 3340.04            | 10381.87           | 5.418                          | 2243.48            | 12155.32           |
| A_68_P26817224 | chr9:108838919-108838963                          | NM_025407:280      | Uqerc1     | INSIDE                 | 1.634                                                        | 3.523                          | 5287.92            | 18628.69           | 5.757                          | 4049.89            | 23316.55           |
| A_68_P27804722 | chr11:53244281-53244325                           | NM_025352:31       | Uqerq      | INSIDE                 | 1.769                                                        | 1.652                          | 602.65             | 995.78             | 2.923                          | 574.97             | 1680.60            |
| A_68_P30959119 | chr16:90810476-90810520                           | NM_029497:160      | Urb1       | INSIDE                 | 2.136                                                        | 3.049                          | 1905.85            | 5811.50            | 6.515                          | 1616.24            | 10529.11           |
| A_68_P27564785 | chr11:5641343-5641387                             | NM_178623:-185     | Urgcp      | PROMOTER               | 2.009                                                        | 0.300                          | 1036.82            | 310.68             | 0.602                          | 1175.91            | 707.96             |
| A_68_P25034247 | chr7:31740799-31740843                            | NM_011680:1002     | Usf2       | INSIDE                 | 1.512                                                        | 2.427                          | 822.98             | 1997.11            | 3.670                          | 742.19             | 2723.71            |
| A_68_P28152781 | chr11:115183238-115183282                         | NM_176847:-28      | Ush1g      | PROMOTER               | 1.970                                                        | 9.441                          | 10000.64           | 94413.83           | 18.600                         | 6015.03            | 111879.70          |
| A_68_P26217005 | chr8:122480667-122480711                          | NM_009462:45937    | Usp10      | INSIDE                 | 2.097                                                        | 5.459                          | 7807.56            | 42622.45           | 11.448                         | 5530.16            | 63309.99           |
| A_68_P32975180 | chr9:108393143-108393187                          | NM_027804:158      | Usp19      | INSIDE                 | 1.610                                                        | 2.831                          | 1154.50            | 3268.25            | 4.559                          | 1078.28            | 4915.64            |
| A_68_P27846979 | chr11:60988330-60988374                           | NM_001004143:209   | Usp22      | INSIDE                 | 1.658                                                        | 2.382                          | 587.13             | 1398.64            | 3.949                          | 512.90             | 2025.31            |
| A_68_P22650044 | chr3:152009738-152009782                          | NM_001076676:316   | Usp33      | INSIDE                 | 1.582                                                        | 2.830                          | 733.50             | 2075.90            | 4.476                          | 652.95             | 2922.67            |
| A_68_P25349892 | chr7:104473950-104473994                          | NM_001177412:502   | Usp35      | INSIDE                 | 2.080                                                        | 2.019                          | 288.84             | 583.25             | 4.200                          | 214.06             | 899.00             |
| A_68_P26814405 | chr9:108250089-108250133                          | NM_011678:-51      | Usp4       | PROMOTER               | 1.604                                                        | 2.988                          | 1313.14            | 3923.16            | 4.793                          | 1096.62            | 5256.58            |
| A_68_P20421182 | chr1:89904977-89905021                            | NM_001033291:128   | Usp40      | INSIDE                 | 1.787                                                        | 3.697                          | 4393.92            | 16244.86           | 6.605                          | 3280.38            | 21667.59           |
| A_68_P31213521 | chr17:47809690-47809734                           | NM_198421:42074    | Usp49      | INSIDE                 | 1.612                                                        | 2.789                          | 2117.42            | 5904.90            | 4.496                          | 1779.78            | 8002.52            |
| A_68_P20372363 | chr1:78654178-78654222                            | NM_001001981:-199  | Utp14b     | PROMOTER               | 1.779                                                        | 2.805                          | 1095.37            | 3072.37            | 4.989                          | 992.11             | 4949.18            |
| A_68_P25360010 | chr7:106289656-106289700                          | NM_178635:-24      | Uvrag      | PROMOTER               | 1.703                                                        | 2.507                          | 1624.33            | 4071.82            | 4.270                          | 1259.73            | 5378.94            |
| A_68_P27892954 | chr11:68901870-68901914                           | NM_009497:-137     | Vamp2      | PROMOTER               | 1.760                                                        | 1.492                          | 1659.78            | 2477.16            | 2.626                          | 1196.24            | 3141.60            |
| A_68_P23409805 | chr4:150432256-150432300                          | NM_009498:-216     | Vamp3      | PROMOTER               | 1.723                                                        | 5.061                          | 4467.10            | 22606.50           | 8.719                          | 3000.37            | 26159.48           |
| A_68_P20935551 | chr1:192803342-192803386                          | NR_027352:-189     | Vash2      | PROMOTER               | 1.515                                                        | 2.830                          | 1064.05            | 3011.52            | 4.287                          | 847.11             | 3631.88            |
| A_68_P24992404 | chr7:19857862-19857906                            | NM_009499:-681     | Vasp       | PROMOTER               | 1.643                                                        | 1.942                          | 3920.49            | 7612.56            | 3.190                          | 3319.71            | 10591.52           |
| A_68_P28074030 | chr11:101327012-101327056                         | NM_012037:479      | Vat1       | INSIDE                 | 1.577                                                        | 3.290                          | 3016.42            | 9925.08            | 5.188                          | 2617.11            | 13577.53           |
| A_68_P21084621 | chr2:27281926-27281970                            | NM_009500:397      | Vav2       | INSIDE                 | 1.547                                                        | 2.812                          | 1136.36            | 3195.93            | 4.352                          | 994.41             | 4327.32            |
| A_68_P32217704 | chr19:59246215-59246259                           | NM_009501:-1717    | Vax1       | PROMOTER               | 1.684                                                        | 2.583                          | 3160.67            | 8165.50            | 4.349                          | 2353.74            | 10237.25           |
| A_68_P29210184 | chr13:89879184-89879228                           | NM_001081249:2911  | Vcan       | INSIDE                 | 1.606                                                        | 2.401                          | 503.61             | 1209.38            | 3.856                          | 446.94             | 1723.49            |
| A_68_P29449770 | chr14:21748700-21748744                           | NM_009502:68       | Vcl        | INSIDE                 | 1.969                                                        | 3.193                          | 4035.96            | 12886.43           | 6.286                          | 3134.26            | 19703.38           |
| A_68_P29449771 | chr14:21748812-21748856                           | NM_009502:180      | Vcl        | INSIDE                 | 2.043                                                        | 1.657                          | 1740.03            | 2882.66            | 3.385                          | 1324.16            | 4482.62            |
| A_68_P31204664 | chr17:46168459-46168503                           | NM_001110266:-6368 | Vegfa      | PROMOTER               | 1.868                                                        | 3.938                          | 2692.61            | 10604.08           | 7.358                          | 1954.89            | 14383.83           |
| A_68_P31937159 | chr19:7062178-7062222                             | NM_001185164:-59   | Vegfb      | PROMOTER               | 1.636                                                        | 4.237                          | 3920.15            | 16608.12           | 6.932                          | 3142.11            | 21780.69           |
| A_68_P24124224 | chr5:137507416-137507460                          | NM_001039385:1274  | Vgf        | INSIDE                 | 1.972                                                        | 7.730                          | 2393.17            | 18499.10           | 15.247                         | 1785.80            | 27227.51           |
| A_68_P24124212 | chr5:137506063-137506107                          | NM_001039385:-80   | Vgf        | PROMOTER               | 1.663                                                        | 2.955                          | 535.21             | 1581.64            | 4.915                          | 464.93             | 2285.03            |
| A_68_P24124227 | chr5:137507750-137507794                          | NM_001039385:1608  | Vgf        | INSIDE                 | 1.591                                                        | 6.809                          | 422.38             | 2876.05            | 10.831                         | 459.61             | 4978.05            |

| ProbeName      | Target position of probe on CpG island microarray | TargetID           | GeneSymbol | CpG island Description | Ratio of relative methylation (TiO <sub>2</sub> -NP/Vehicle) | Sham group                     |                    |                    | TiO <sub>2</sub> -H group      |                    |                    |
|----------------|---------------------------------------------------|--------------------|------------|------------------------|--------------------------------------------------------------|--------------------------------|--------------------|--------------------|--------------------------------|--------------------|--------------------|
|                |                                                   |                    |            |                        |                                                              | Relative methylation (Cy5/Cy3) | Cy3 signal (Input) | Cy5 signal (MeDIP) | Relative methylation (Cy5/Cy3) | Cy3 signal (Input) | Cy5 signal (MeDIP) |
| A_68_P21017263 | chr2:13495869-13495913                            | NM_011701:-47      | Vim        | PROMOTER               | 2.359                                                        | 3.510                          | 257.85             | 905.15             | 8.280                          | 190.22             | 1574.90            |
| A_68_P21017264 | chr2:13495981-13496025                            | NM_011701:65       | Vim        | INSIDE                 | 1.832                                                        | 3.783                          | 3082.57            | 11659.97           | 6.931                          | 2498.75            | 17319.85           |
| A_68_P28765899 | chr12:117316302-117316346                         | NM_009511:129      | Vipr2      | INSIDE                 | 1.659                                                        | 1.819                          | 1316.78            | 2395.76            | 3.018                          | 1029.57            | 3107.40            |
| A_68_P24091293 | chr5:130418207-130418251                          | NM_001001327:246   | Vkorec11   | INSIDE                 | 1.717                                                        | 6.268                          | 943.56             | 5914.16            | 10.764                         | 1054.67            | 11352.37           |
| A_68_P31257913 | chr17:56856203-56856247                           | NM_178926:120      | Vmac       | INSIDE                 | 1.560                                                        | 1.548                          | 592.48             | 917.36             | 2.415                          | 522.90             | 1262.62            |
| A_68_P31982219 | chr19:16855558-16855602                           | NM_173028:-163     | Vps13a     | PROMOTER               | 1.656                                                        | 3.918                          | 1634.12            | 6403.20            | 6.488                          | 1341.32            | 8703.07            |
| A_68_P31982216 | chr19:16855225-16855273                           | NM_173028:169      | Vps13a     | INSIDE                 | 1.537                                                        | 1.643                          | 672.73             | 1105.45            | 2.526                          | 541.01             | 1366.40            |
| A_68_P30133051 | chr15:35301203-35301247                           | NM_177151:-76      | Vps13b     | PROMOTER               | 1.547                                                        | 3.342                          | 818.23             | 2734.90            | 5.169                          | 728.49             | 3765.74            |
| A_68_P23381901 | chr4:144785001-144785047                          | NM_001128198:-4529 | Vps13d     | PROMOTER               | 1.969                                                        | 2.303                          | 958.14             | 2206.35            | 4.534                          | 812.58             | 3684.09            |
| A_68_P23381898 | chr4:144784634-144784678                          | NM_001128198:-4161 | Vps13d     | PROMOTER               | 1.523                                                        | 2.268                          | 1021.53            | 2316.37            | 3.453                          | 893.16             | 3083.71            |
| A_68_P24536895 | chr6:71493871-71493915                            | NM_025783:45       | Vps24      | INSIDE                 | 2.044                                                        | 6.284                          | 3257.70            | 20471.36           | 12.844                         | 2453.21            | 31509.98           |
| A_68_P27186303 | chr10:61949193-61949237                           | NM_001113355:132   | Vps26a     | INSIDE                 | 2.075                                                        | 17.294                         | 1212.62            | 20971.44           | 35.885                         | 866.21             | 31083.98           |
| A_68_P22347225 | chr3:95861928-95861972                            | NM_013841:428      | Vps45      | INSIDE                 | 1.773                                                        | 1.463                          | 941.12             | 1376.55            | 2.593                          | 861.27             | 2233.70            |
| A_68_P27635752 | chr11:21139299-21139343                           | NM_139061:429      | Vps54      | INSIDE                 | 1.804                                                        | 4.071                          | 1720.94            | 7005.72            | 7.344                          | 1344.29            | 9872.08            |
| A_68_P24019920 | chr5:117769201-117769245                          | NM_001033311:-52   | Vsig10     | PROMOTER               | 1.898                                                        | 1.432                          | 926.32             | 1326.26            | 2.717                          | 833.12             | 2263.95            |
| A_68_P32203587 | chr19:56948670-56948714                           | NM_172840:-213     | Vwa2       | PROMOTER               | 1.857                                                        | 2.149                          | 2555.17            | 5491.18            | 3.992                          | 1976.20            | 7888.36            |
| A_68_P30588341 | chr16:20591588-20591632                           | NM_182636:1956     | Vwa5b2     | INSIDE                 | 2.020                                                        | 2.519                          | 1889.99            | 4761.39            | 5.088                          | 1498.07            | 7621.73            |
| A_68_P30588338 | chr16:20591336-20591380                           | NM_182636:1704     | Vwa5b2     | INSIDE                 | 1.582                                                        | 3.605                          | 2568.88            | 9259.68            | 5.704                          | 1877.16            | 10707.37           |
| A_68_P27589635 | chr11:11013930-11013974                           | NM_177033:-66      | Vwc2       | PROMOTER               | 1.594                                                        | 2.232                          | 460.96             | 1029.09            | 3.559                          | 447.80             | 1593.57            |
| A_68_P31479225 | chr18:7869058-7869102                             | NM_001146298:-114  | Wac        | PROMOTER               | 1.974                                                        | 4.017                          | 3388.04            | 13608.31           | 7.928                          | 2757.80            | 21863.00           |
| A_68_P31479231 | chr18:7869684-7869728                             | NM_001146298:512   | Wac        | INSIDE                 | 1.656                                                        | 2.321                          | 1157.71            | 2686.65            | 3.844                          | 944.48             | 3630.44            |
| A_68_P31479228 | chr18:7869362-7869406                             | NM_001146298:190   | Wac        | INSIDE                 | 1.645                                                        | 2.198                          | 2696.63            | 5927.22            | 3.616                          | 2065.93            | 7469.93            |
| A_68_P29751622 | chr14:79881067-79881111                           | NM_018765:-13      | Wbp4       | PROMOTER               | 1.876                                                        | 0.357                          | 1577.79            | 563.98             | 0.670                          | 1430.02            | 958.78             |
| A_68_P23938671 | chr5:102499208-102499252                          | NM_172882:-290     | Wdfy3      | PROMOTER               | 1.658                                                        | 3.288                          | 855.64             | 2813.62            | 5.451                          | 698.08             | 3756.44            |
| A_68_P25516578 | chr7:136735619-136735663                          | NM_172255:264      | Wdr11      | INSIDE                 | 2.632                                                        | 0.212                          | 1316.65            | 279.76             | 0.559                          | 1149.78            | 642.91             |
| A_68_P20267395 | chr1:60155522-60155566                            | NM_001199060:-200  | Wdr12      | PROMOTER               | 1.939                                                        | 3.578                          | 1891.30            | 6767.76            | 6.938                          | 1500.30            | 10409.78           |
| A_68_P28739967 | chr12:111976055-111976099                         | NM_027149:-82      | Wdr20a     | PROMOTER               | 1.544                                                        | 3.066                          | 1411.64            | 4327.86            | 4.735                          | 1260.98            | 5970.71            |
| A_68_P20880195 | chr1:183141802-183141846                          | NM_145514:285      | Wdr26      | INSIDE                 | 1.779                                                        | 4.212                          | 2162.58            | 9109.20            | 7.493                          | 1734.85            | 12999.94           |
| A_68_P28225578 | chr12:8980743-8980787                             | NM_001159527:-42   | Wdr35      | PROMOTER               | 1.921                                                        | 2.640                          | 7446.62            | 19660.79           | 5.071                          | 5556.74            | 28180.03           |
| A_68_P31335313 | chr17:71965569-71965613                           | NM_175639:36       | Wdr43      | INSIDE                 | 1.523                                                        | 1.559                          | 551.97             | 860.51             | 2.374                          | 500.10             | 1187.19            |
| A_68_P28190095 | chr11:121215875-121215919                         | NM_025793:-135     | Wdr45l     | PROMOTER               | 1.630                                                        | 9.024                          | 2659.39            | 23999.48           | 14.714                         | 1804.12            | 26545.49           |
| A_68_P31625687 | chr18:36919881-36919925                           | NM_026464:10       | Wdr55      | INSIDE                 | 1.574                                                        | 3.041                          | 1928.33            | 5863.74            | 4.786                          | 1532.31            | 7333.66            |
| A_68_P27926183 | chr11:75267995-75268039                           | NM_138950:203      | Wdr81      | INSIDE                 | 1.612                                                        | 1.934                          | 384.97             | 744.61             | 3.117                          | 383.70             | 1196.10            |
| A_68_P24358614 | chr6:34860895-34860939                            | NM_001013366:-85   | Wdr91      | PROMOTER               | 1.649                                                        | 1.524                          | 6329.07            | 9643.26            | 2.512                          | 4657.72            | 11699.40           |
| A_68_P32152243 | chr19:47911627-47911671                           | NM_027559:203      | Wdr96      | INSIDE                 | 1.512                                                        | 1.971                          | 1964.46            | 3872.11            | 2.981                          | 1536.97            | 4581.51            |
| A_68_P23317106 | chr4:132895104-132895148                          | NM_199306:104      | Wdte1      | INSIDE                 | 1.708                                                        | 4.498                          | 11435.70           | 51436.61           | 7.681                          | 8078.16            | 62051.66           |
| A_68_P25411826 | chr7:117266404-117266448                          | NM_009516:854      | Wee1       | INSIDE                 | 1.538                                                        | 2.467                          | 904.96             | 2232.32            | 3.794                          | 799.90             | 3034.79            |
| A_68_P25411827 | chr7:117266477-117266521                          | NM_009516:926      | Wee1       | INSIDE                 | 1.830                                                        | 1.663                          | 628.36             | 1044.80            | 3.043                          | 619.02             | 1883.92            |
| A_68_P27543031 | chr10:128185237-128185281                         | NM_001170869:-319  | Wibg       | PROMOTER               | 1.949                                                        | 1.732                          | 406.22             | 703.63             | 3.376                          | 336.20             | 1134.90            |
| A_68_P28119629 | chr11:109472837-109472881                         | NM_145940:-155     | Wipi1      | PROMOTER               | 1.945                                                        | 2.160                          | 5773.50            | 12469.26           | 4.201                          | 4146.90            | 17421.64           |
| A_68_P28119631 | chr11:109473059-109473103                         | NM_145940:-377     | Wipi1      | PROMOTER               | 1.670                                                        | 3.869                          | 13921.71           | 53858.78           | 6.460                          | 10681.12           | 68996.43           |
| A_68_P24152591 | chr5:143105523-143105567                          | NM_178398:7        | Wipi2      | INSIDE                 | 1.820                                                        | 3.101                          | 1127.27            | 3495.87            | 5.644                          | 958.11             | 5407.37            |
| A_68_P24152597 | chr5:143106025-143106069                          | NM_178398:509      | Wipi2      | INSIDE                 | 1.725                                                        | 2.031                          | 1971.87            | 4004.07            | 3.502                          | 1589.00            | 5564.96            |
| A_68_P20350627 | chr1:74849814-74849858                            | NM_009518:11244    | Wnt10a     | INSIDE                 | 1.725                                                        | 3.465                          | 3093.07            | 10717.89           | 5.977                          | 2626.35            | 15696.38           |
| A_68_P20350529 | chr1:74838384-74838428                            | NM_009518:-186     | Wnt10a     | PROMOTER               | 1.613                                                        | 4.124                          | 4948.69            | 20405.98           | 6.653                          | 3730.25            | 24816.45           |
| A_68_P30476395 | chr15:98606917-98606961                           | NM_011718:1643     | Wnt10b     | INSIDE                 | 1.706                                                        | 9.467                          | 3105.78            | 29401.01           | 16.152                         | 2449.64            | 39567.60           |
| A_68_P30476410 | chr15:98608643-98608687                           | NM_011718:-83      | Wnt10b     | PROMOTER               | 1.604                                                        | 1.353                          | 4751.71            | 6428.46            | 2.170                          | 3765.60            | 8171.33            |



| ProbeName      | Target position of probe on CpG island microarray | TargetID           | GeneSymbol | CpG island Description | Ratio of relative methylation (TiO <sub>2</sub> -NP/Vehicle) | Sham group                     |                    |                    | TiO <sub>2</sub> -H group      |                    |                    |
|----------------|---------------------------------------------------|--------------------|------------|------------------------|--------------------------------------------------------------|--------------------------------|--------------------|--------------------|--------------------------------|--------------------|--------------------|
|                |                                                   |                    |            |                        |                                                              | Relative methylation (Cy5/Cy3) | Cy3 signal (Input) | Cy5 signal (MeDIP) | Relative methylation (Cy5/Cy3) | Cy3 signal (Input) | Cy5 signal (MeDIP) |
| A_68_P22394252 | chr3:104770874-104770918                          | NM_009520:-6269    | Wnt2b      | PROMOTER               | 1.531                                                        | 2.252                          | 1357.05            | 3055.94            | 3.448                          | 1114.67            | 3843.22            |
| A_68_P27836028 | chr11:59103858-59103902                           | NM_009522:373      | Wnt3a      | INSIDE                 | 1.883                                                        | 2.885                          | 1333.86            | 3847.79            | 5.431                          | 1095.47            | 5949.46            |
| A_68_P27835858 | chr11:59077515-59077559                           | NM_009522:26717    | Wnt3a      | INSIDE                 | 1.500                                                        | 2.344                          | 2131.54            | 4997.33            | 3.518                          | 1898.80            | 6679.52            |
| A_68_P24638868 | chr6:91361534-91361578                            | NM_009527:-193     | Wnt7a      | PROMOTER               | 3.112                                                        | 4.262                          | 1684.23            | 7177.50            | 13.263                         | 1343.70            | 17822.06           |
| A_68_P24638863 | chr6:91360911-91360955                            | NM_009527:431      | Wnt7a      | INSIDE                 | 1.557                                                        | 2.287                          | 1572.05            | 3594.67            | 3.560                          | 1198.48            | 4266.50            |
| A_68_P28086889 | chr11:103611261-103611305                         | NM_011719:-147     | Wnt9b      | PROMOTER               | 1.839                                                        | 4.097                          | 1081.37            | 4430.58            | 7.536                          | 805.24             | 6068.44            |
| A_68_P28931383 | chr13:32894479-32894523                           | NM_030215:602      | Wrip1      | INSIDE                 | 1.502                                                        | 3.982                          | 1699.99            | 6769.26            | 5.980                          | 1708.82            | 10218.32           |
| A_68_P27907296 | chr11:71564250-71564294                           | NM_177618:68       | Wscd1      | INSIDE                 | 1.860                                                        | 4.496                          | 4666.83            | 20981.39           | 8.363                          | 3397.05            | 28410.13           |
| A_68_P27907301 | chr11:71564787-71564831                           | NM_177618:604      | Wscd1      | INSIDE                 | 1.681                                                        | 2.114                          | 1199.61            | 2536.24            | 3.555                          | 939.08             | 3338.21            |
| A_68_P21492621 | chr2:104966817-104966861                          | NM_144783:153      | Wt1        | INSIDE                 | 2.243                                                        | 4.140                          | 9624.40            | 39847.81           | 9.288                          | 6641.61            | 61684.67           |
| A_68_P25844867 | chr8:49075341-49075385                            | NM_133791:543      | Wwc2       | INSIDE                 | 2.049                                                        | 5.154                          | 5036.50            | 25958.43           | 10.560                         | 3628.59            | 38319.47           |
| A_68_P25844872 | chr8:49076065-49076109                            | NM_133791:-181     | Wwc2       | PROMOTER               | 1.558                                                        | 3.399                          | 3388.99            | 11519.48           | 5.297                          | 3233.27            | 17126.42           |
| A_68_P22766408 | chr4:19636033-19636077                            | NM_177327:86       | Wwp1       | INSIDE                 | 1.633                                                        | 3.436                          | 1455.50            | 5000.53            | 5.611                          | 1334.52            | 7487.54            |
| A_68_P32340723 | chrX:39421307-39421351                            | NM_009688:316      | Xiap       | INSIDE                 | 2.308                                                        | 3.837                          | 2381.77            | 9138.39            | 8.854                          | 1191.40            | 10548.87           |
| A_68_P32340725 | chrX:39421489-39421533                            | NM_009688:498      | Xiap       | INSIDE                 | 1.543                                                        | 3.144                          | 351.26             | 1104.43            | 4.851                          | 150.06             | 727.98             |
| A_68_P26875613 | chr9:119920587-119920631                          | NM_011724:12108    | Xirp1      | DOWNSTREAM             | 1.754                                                        | 2.196                          | 2506.01            | 5503.35            | 3.852                          | 2088.07            | 8042.98            |
| A_68_P32573117 | chrX:100677336-100677380                          | NR_001463:1214     | Xist       | INSIDE                 | 1.721                                                        | 2.053                          | 4041.71            | 8298.95            | 3.533                          | 1728.31            | 6105.93            |
| A_68_P32573118 | chrX:100677473-100677517                          | NR_001463:1078     | Xist       | INSIDE                 | 1.547                                                        | 3.534                          | 3844.65            | 13587.88           | 5.467                          | 1405.29            | 7682.44            |
| A_68_P21752520 | chr2:152857602-152857646                          | NM_001011732:37    | Xkr7       | INSIDE                 | 1.966                                                        | 7.358                          | 1460.41            | 10745.14           | 14.466                         | 1068.59            | 15458.44           |
| A_68_P21752521 | chr2:152857720-152857764                          | NM_001011732:155   | Xkr7       | INSIDE                 | 1.930                                                        | 4.795                          | 3267.73            | 15669.96           | 9.254                          | 2596.29            | 24027.08           |
| A_68_P21752666 | chr2:152880620-152880664                          | NM_001011732:23055 | Xkr7       | INSIDE                 | 1.679                                                        | 4.032                          | 1917.47            | 7731.35            | 6.769                          | 1550.20            | 10493.70           |
| A_68_P25499304 | chr7:133344026-133344070                          | NM_028816:-126     | Xpo6       | PROMOTER               | 2.285                                                        | 19.109                         | 8771.90            | 167619.40          | 43.660                         | 5610.62            | 244958.70          |
| A_68_P20737714 | chr1:157264468-157264512                          | NM_011273:84       | Xpr1       | INSIDE                 | 1.558                                                        | 3.906                          | 11830.67           | 46212.57           | 6.084                          | 9122.39            | 55504.65           |
| A_68_P25005467 | chr7:25332066-25332110                            | NM_009532:-80      | Xrc1       | DIVERGENT_PROMOTER     | 1.719                                                        | 2.836                          | 1884.27            | 5344.33            | 4.875                          | 1417.59            | 6910.93            |
| A_68_P27532842 | chr10:126338342-126338386                         | NM_026858:63       | Xrcc6bp1   | INSIDE                 | 2.017                                                        | 4.400                          | 3059.98            | 13463.66           | 8.873                          | 2300.66            | 20414.17           |
| A_68_P25364270 | chr7:107007573-107007617                          | NM_001164258:-133  | Xrra1      | DIVERGENT_PROMOTER     | 1.512                                                        | 3.183                          | 829.70             | 2640.68            | 4.811                          | 747.86             | 3598.25            |
| A_68_P26290461 | chr9:8004643-8004687                              | NM_001171147:-68   | Yap1       | PROMOTER               | 1.878                                                        | 5.407                          | 3903.80            | 21106.63           | 10.155                         | 3228.67            | 32788.72           |
| A_68_P23584753 | chr5:32913192-32913236                            | NM_001205132:-329  | Yes1       | PROMOTER               | 1.611                                                        | 2.569                          | 2853.62            | 7330.54            | 4.138                          | 2033.11            | 8412.94            |
| A_68_P32552603 | chrX:96133526-96133570                            | NM_207633:429      | Yipf6      | INSIDE                 | 1.698                                                        | 2.647                          | 821.91             | 2175.68            | 4.496                          | 459.10             | 2064.03            |
| A_68_P27565811 | chr11:5855744-5855788                             | NM_019661:6        | Ykt6       | INSIDE                 | 1.592                                                        | 1.660                          | 494.53             | 820.84             | 2.643                          | 392.71             | 1037.95            |
| A_68_P28601528 | chr12:86337027-86337071                           | NM_178363:-222     | Ylpm1      | PROMOTER               | 1.686                                                        | 2.102                          | 574.60             | 1208.09            | 3.545                          | 463.35             | 1642.77            |
| A_68_P20611349 | chr1:132613579-132613625                          | NM_178691:-301     | Yod1       | DIVERGENT_PROMOTER     | 1.830                                                        | 2.158                          | 504.55             | 1088.79            | 3.949                          | 468.83             | 1851.55            |
| A_68_P23865427 | chr5:87233816-87233860                            | NM_177680:324      | Ythdc1     | INSIDE                 | 1.725                                                        | 1.739                          | 413.95             | 720.01             | 3.000                          | 361.58             | 1084.78            |
| A_68_P23310689 | chr4:131767916-131767960                          | NM_145393:233      | Ythdf2     | INSIDE                 | 1.732                                                        | 4.831                          | 8487.61            | 41002.43           | 8.366                          | 6485.99            | 54258.90           |
| A_68_P24118628 | chr5:136410394-136410438                          | NM_018871:95       | Ywhag      | INSIDE                 | 1.695                                                        | 1.624                          | 1284.33            | 2086.11            | 2.752                          | 987.55             | 2718.20            |
| A_68_P30140505 | chr15:36723538-36723582                           | NM_011740:733      | Ywhaz      | INSIDE                 | 1.623                                                        | 2.586                          | 1808.20            | 4675.67            | 4.198                          | 1640.94            | 6888.50            |
| A_68_P28729933 | chr12:110032849-110032893                         | NM_009537:1350     | Yy1        | INSIDE                 | 1.634                                                        | 2.528                          | 1099.01            | 2778.47            | 4.132                          | 930.27             | 3843.93            |
| A_68_P21936419 | chr3:9251754-9251798                              | NM_177660:1210     | Zbtb10     | INSIDE                 | 1.503                                                        | 2.892                          | 5521.23            | 15969.96           | 4.346                          | 4422.08            | 19220.12           |
| A_68_P26494143 | chr9:48643240-48643284                            | NM_001033324:788   | Zbtb16     | INSIDE                 | 1.836                                                        | 5.724                          | 2309.58            | 13219.75           | 10.510                         | 1649.43            | 17335.96           |
| A_68_P31150957 | chr17:34053104-34053148                           | NM_020625:6        | Zbtb22     | INSIDE                 | 1.779                                                        | 4.398                          | 11456.48           | 50390.67           | 7.827                          | 8771.91            | 68655.84           |
| A_68_P28553589 | chr12:77470150-77470194                           | NM_001172104:279   | Zbtb25     | INSIDE                 | 1.578                                                        | 2.047                          | 870.21             | 1781.03            | 3.230                          | 770.10             | 2487.54            |
| A_68_P32326603 | chrX:35543022-35543066                            | NM_001079513:75    | Zbtb33     | INSIDE                 | 2.011                                                        | 4.310                          | 831.73             | 3584.55            | 8.668                          | 491.76             | 4262.69            |
| A_68_P27896951 | chr11:69579684-69579728                           | NM_029348:293      | Zbtb4      | INSIDE                 | 1.927                                                        | 6.578                          | 853.34             | 5613.07            | 12.676                         | 665.38             | 8434.45            |
| A_68_P28751776 | chr12:113916958-113917002                         | NM_001100460:-70   | Zbtb42     | DIVERGENT_PROMOTER     | 2.209                                                        | 2.980                          | 806.11             | 2402.03            | 6.582                          | 700.69             | 4611.84            |
| A_68_P21121774 | chr2:33323833-33323877                            | NM_001025594:198   | Zbtb43     | INSIDE                 | 1.528                                                        | 2.141                          | 1900.30            | 4068.74            | 3.271                          | 1754.03            | 5738.29            |
| A_68_P26398232 | chr9:30838076-30838120                            | NM_001115130:-130  | Zbtb44     | PROMOTER               | 1.584                                                        | 5.966                          | 5734.07            | 34207.50           | 9.452                          | 4537.35            | 42885.20           |
| A_68_P22880598 | chr4:45025167-45025211                            | NM_001163283:96    | Zbtb5      | INSIDE                 | 1.503                                                        | 4.230                          | 645.60             | 2730.70            | 6.358                          | 540.93             | 3439.40            |

| ProbeName      | Target position of probe on CpG island microarray | TargetID           | GeneSymbol | CpG island Description | Ratio of relative methylation (TiO <sub>2</sub> -NP/Vehicle) | Sham group                     |                    |                    | TiO <sub>2</sub> -H group      |                    |                    |
|----------------|---------------------------------------------------|--------------------|------------|------------------------|--------------------------------------------------------------|--------------------------------|--------------------|--------------------|--------------------------------|--------------------|--------------------|
|                |                                                   |                    |            |                        |                                                              | Relative methylation (Cy5/Cy3) | Cy3 signal (Input) | Cy5 signal (MeDIP) | Relative methylation (Cy5/Cy3) | Cy3 signal (Input) | Cy5 signal (MeDIP) |
| A_68_P27287617 | chr10:80598897-80598941                           | NM_010731:-97      | Zbtb7a     | PROMOTER               | 1.721                                                        | 3.469                          | 1436.35            | 4982.19            | 5.968                          | 1224.08            | 7305.29            |
| A_68_P27287712 | chr10:80611089-80611133                           | NM_010731:12095    | Zbtb7a     | INSIDE                 | 1.568                                                        | 3.451                          | 1624.44            | 5606.41            | 5.410                          | 1331.74            | 7204.85            |
| A_68_P27287631 | chr10:80600637-80600681                           | NM_010731:1643     | Zbtb7a     | INSIDE                 | 1.509                                                        | 2.562                          | 2040.84            | 5227.85            | 3.864                          | 1790.23            | 6917.92            |
| A_68_P27287623 | chr10:80599677-80599721                           | NM_010731:683      | Zbtb7a     | INSIDE                 | 1.663                                                        | 1.563                          | 1306.00            | 2041.31            | 2.600                          | 1135.28            | 2951.57            |
| A_68_P22319131 | chr3:89200123-89200167                            | NM_009565:-3019    | Zbtb7b     | PROMOTER               | 2.104                                                        | 1.910                          | 3518.56            | 6721.41            | 4.019                          | 2746.25            | 11038.09           |
| A_68_P22319097 | chr3:89196146-89196190                            | NM_009565:957      | Zbtb7b     | INSIDE                 | 1.989                                                        | 0.704                          | 1297.39            | 913.61             | 1.400                          | 1152.06            | 1613.43            |
| A_68_P31839435 | chr18:75979484-75979528                           | NM_145356:-325     | Zbtb7c     | PROMOTER               | 2.041                                                        | 4.500                          | 2203.19            | 9914.56            | 9.184                          | 1824.68            | 16758.33           |
| A_68_P23272336 | chr4:124804630-124804674                          | NM_153159:473      | Zc3h12a    | INSIDE                 | 2.534                                                        | 8.868                          | 9988.09            | 88569.59           | 22.468                         | 6409.08            | 143996.90          |
| A_68_P29726978 | chr14:75684076-75684120                           | NM_026083:-81      | Zc3h13     | PROMOTER               | 2.120                                                        | 8.539                          | 2031.43            | 17345.71           | 18.101                         | 1558.55            | 28211.02           |
| A_68_P26232970 | chr8:124900378-124900422                          | NM_001029993:-115  | Zc3h18     | PROMOTER               | 1.815                                                        | 4.101                          | 833.27             | 3417.54            | 7.443                          | 688.30             | 5123.13            |
| A_68_P21622283 | chr2:128792891-128792935                          | NM_178404:-225     | Zc3h6      | PROMOTER               | 1.942                                                        | 7.387                          | 16791.77           | 124034.50          | 14.346                         | 11192.29           | 160559.10          |
| A_68_P27804178 | chr11:53138130-53138174                           | NM_026479:-38      | Zecch10    | PROMOTER               | 2.182                                                        | 3.232                          | 3439.26            | 11114.35           | 7.051                          | 2390.08            | 16853.17           |
| A_68_P23196094 | chr4:108132526-108132570                          | NM_175472:518      | Zecch11    | INSIDE                 | 1.817                                                        | 10.177                         | 5197.71            | 52899.47           | 18.496                         | 3681.07            | 68086.84           |
| A_68_P20505897 | chr1:107890521-107890565                          | NM_001122675:3560  | Zecch2     | INSIDE                 | 1.734                                                        | 3.021                          | 2180.83            | 6589.31            | 5.239                          | 1749.16            | 9164.54            |
| A_68_P21749221 | chr2:152240295-152240339                          | NM_175126:464      | Zecch3     | INSIDE                 | 1.589                                                        | 3.004                          | 2569.64            | 7720.35            | 4.775                          | 2282.28            | 10898.69           |
| A_68_P23696773 | chr5:53174399-53174443                            | NM_030185:115      | Zecch4     | INSIDE                 | 1.511                                                        | 2.632                          | 2596.84            | 6834.23            | 3.977                          | 2118.43            | 8424.77            |
| A_68_P22878938 | chr4:44769794-44769838                            | NM_138590:386      | Zecch7     | INSIDE                 | 2.063                                                        | 3.570                          | 1474.78            | 5264.24            | 7.363                          | 1251.77            | 9216.30            |
| A_68_P32578106 | chrX:101866324-101866368                          | NM_175358:57       | Zdhhc15    | INSIDE                 | 2.357                                                        | 1.895                          | 739.72             | 1402.08            | 4.467                          | 457.94             | 2045.51            |
| A_68_P32578104 | chrX:101866109-101866153                          | NM_175358:273      | Zdhhc15    | INSIDE                 | 1.899                                                        | 3.304                          | 4590.08            | 15164.50           | 6.274                          | 2668.97            | 16744.35           |
| A_68_P27446660 | chr10:110446716-110446760                         | NM_172554:384      | Zdhhc17    | INSIDE                 | 1.608                                                        | 1.530                          | 3567.01            | 5458.66            | 2.461                          | 2850.16            | 7014.34            |
| A_68_P23059231 | chr4:82505707-82505751                            | NM_026647:-163     | Zdhhc21    | PROMOTER               | 1.617                                                        | 2.859                          | 3478.55            | 9944.80            | 4.624                          | 2488.71            | 11508.13           |
| A_68_P28613409 | chr12:88331117-88331161                           | NM_001080943:-1512 | Zdhhc22    | PROMOTER               | 1.571                                                        | 3.192                          | 1058.11            | 3377.73            | 5.015                          | 913.34             | 4579.94            |
| A_68_P21394209 | chr2:84555435-84555479                            | NM_144887:-135     | Zdhhc5     | PROMOTER               | 2.041                                                        | 7.232                          | 8025.09            | 58033.93           | 14.762                         | 6272.09            | 92586.57           |
| A_68_P26217897 | chr8:122625576-122625620                          | NM_133967:-226     | Zdhhc7     | PROMOTER               | 1.721                                                        | 1.447                          | 1487.66            | 2151.96            | 2.490                          | 1206.32            | 3003.91            |
| A_68_P30578494 | chr16:18234940-18234984                           | NM_172151:267      | Zdhhc8     | INSIDE                 | 2.017                                                        | 3.442                          | 5731.05            | 19726.11           | 6.943                          | 4192.76            | 29109.48           |
| A_68_P30578495 | chr16:18235059-18235103                           | NM_172151:149      | Zdhhc8     | INSIDE                 | 1.591                                                        | 2.521                          | 1763.98            | 4446.77            | 4.011                          | 1455.75            | 5839.54            |
| A_68_P30578497 | chr16:18235357-18235401                           | NM_172151:-149     | Zdhhc8     | PROMOTER               | 1.577                                                        | 2.553                          | 2395.00            | 6115.41            | 4.026                          | 1963.17            | 7903.27            |
| A_68_P31469349 | chr18:5591373-5591417                             | NM_011546:-494     | Zeb1       | PROMOTER               | 1.630                                                        | 2.036                          | 1186.01            | 2415.11            | 3.319                          | 998.95             | 3315.18            |
| A_68_P26153173 | chr8:111324170-111324214                          | NM_007496:85649    | Zfhx3      | INSIDE                 | 1.631                                                        | 2.018                          | 591.48             | 1193.66            | 3.292                          | 440.15             | 1448.85            |
| A_68_P26169432 | chr8:114167808-114167852                          | NM_001037665:488   | Zfp1       | INSIDE                 | 2.202                                                        | 5.107                          | 2651.81            | 13541.72           | 11.244                         | 1977.35            | 22233.90           |
| A_68_P31092441 | chr17:23713283-23713327                           | NM_011747:23150    | Zfp13      | INSIDE                 | 2.092                                                        | 1.581                          | 1651.05            | 2609.73            | 3.307                          | 1243.51            | 4112.10            |
| A_68_P31323668 | chr17:69733260-69733304                           | NM_009547:-35      | Zfp161     | PROMOTER               | 1.505                                                        | 4.474                          | 2569.08            | 11495.08           | 6.736                          | 2114.62            | 14243.16           |
| A_68_P21851410 | chr2:169955855-169955909                          | NM_001033299:838   | Zfp217     | INSIDE                 | 1.663                                                        | 1.431                          | 1120.11            | 1603.07            | 2.379                          | 944.80             | 2248.13            |
| A_68_P24786877 | chr6:118405159-118405203                          | NM_028335:344      | Zfp248     | INSIDE                 | 1.560                                                        | 2.221                          | 2692.98            | 5980.02            | 3.464                          | 2110.48            | 7311.15            |
| A_68_P26342514 | chr9:20264309-20264353                            | NM_011753:274      | Zfp26      | INSIDE                 | 2.597                                                        | 5.833                          | 12946.13           | 75517.71           | 15.147                         | 9104.24            | 137900.20          |
| A_68_P32462210 | chrX:70599683-70599727                            | NM_001160229:11745 | Zfp275     | INSIDE                 | 1.580                                                        | 3.811                          | 1027.01            | 3913.44            | 6.020                          | 642.16             | 3866.00            |
| A_68_P26238816 | chr8:125778247-125778291                          | NM_020497:174      | Zfp276     | INSIDE                 | 1.951                                                        | 7.620                          | 4136.00            | 31517.69           | 14.868                         | 3031.78            | 45076.72           |
| A_68_P32365466 | chrX:45947510-45947554                            | NM_153532:-2222    | Zfp280c    | PROMOTER               | 2.676                                                        | 5.021                          | 1811.17            | 9094.51            | 13.439                         | 945.31             | 12704.10           |
| A_68_P24973879 | chr7:13551564-13551609                            | NM_178732:374      | Zfp324     | INSIDE                 | 2.727                                                        | 10.119                         | 12804.14           | 129564.20          | 27.590                         | 6837.10            | 188638.10          |
| A_68_P27792052 | chr11:50873003-50873047                           | NM_009329:266      | Zfp354a    | INSIDE                 | 1.620                                                        | 4.509                          | 3530.93            | 15919.26           | 7.304                          | 2608.28            | 19049.86           |
| A_68_P21359595 | chr2:77654503-77654547                            | NM_178723:349      | Zfp385b    | INSIDE                 | 2.000                                                        | 4.636                          | 925.18             | 4289.04            | 9.270                          | 697.33             | 6464.28            |
| A_68_P27833411 | chr11:58717772-58717816                           | NM_011758:-67      | Zfp39      | PROMOTER               | 1.812                                                        | 5.846                          | 8399.74            | 49106.03           | 10.592                         | 6079.29            | 64392.64           |
| A_68_P29672987 | chr14:65977066-65977114                           | NM_199029:-422     | Zfp395     | PROMOTER               | 1.711                                                        | 3.926                          | 498.77             | 1958.26            | 6.719                          | 434.67             | 2920.36            |
| A_68_P29672994 | chr14:65977929-65977973                           | NM_199029:438      | Zfp395     | INSIDE                 | 1.551                                                        | 0.410                          | 847.18             | 347.45             | 0.636                          | 967.85             | 615.83             |
| A_68_P26036153 | chr8:90184081-90184125                            | NM_033327:299392   | Zfp423     | DOWNSTREAM             | 1.860                                                        | 2.586                          | 2470.14            | 6388.56            | 4.811                          | 1808.14            | 8699.09            |
| A_68_P26038373 | chr8:90485269-90485313                            | NM_033327:-1796    | Zfp423     | PROMOTER               | 1.672                                                        | 9.737                          | 873.67             | 8506.77            | 16.277                         | 734.07             | 11948.65           |
| A_68_P26038355 | chr8:90482696-90482740                            | NM_033327:776      | Zfp423     | INSIDE                 | 1.523                                                        | 2.485                          | 1179.34            | 2930.14            | 3.784                          | 1066.12            | 4034.58            |

| ProbeName      | Target position of probe on CpG island microarray | TargetID           | GeneSymbol | CpG island Description | Ratio of relative methylation (TiO <sub>2</sub> -NP/Vehicle) | Sham group                     |                    |                    | TiO <sub>2</sub> -H group      |                    |                    |
|----------------|---------------------------------------------------|--------------------|------------|------------------------|--------------------------------------------------------------|--------------------------------|--------------------|--------------------|--------------------------------|--------------------|--------------------|
|                |                                                   |                    |            |                        |                                                              | Relative methylation (Cy5/Cy3) | Cy3 signal (Input) | Cy5 signal (MeDIP) | Relative methylation (Cy5/Cy3) | Cy3 signal (Input) | Cy5 signal (MeDIP) |
| A_68_P25005234 | chr7:25292077-25292122                            | NM_146183:-6       | Zfp428     | PROMOTER               | 1.664                                                        | 1.725                          | 2355.04            | 4063.24            | 2.871                          | 1775.29            | 5097.13            |
| A_68_P24954457 | chr7:6141163-6141207                              | NM_001146024:17070 | Zfp444     | INSIDE                 | 1.633                                                        | 2.299                          | 250.55             | 575.91             | 3.754                          | 227.18             | 852.87             |
| A_68_P24973956 | chr7:13563487-13563531                            | NM_001168561:312   | Zfp446     | INSIDE                 | 1.927                                                        | 4.269                          | 926.05             | 3952.94            | 8.225                          | 813.97             | 6694.80            |
| A_68_P22931104 | chr4:54958261-54958305                            | NM_172867:-2534    | Zfp462     | PROMOTER               | 1.701                                                        | 2.761                          | 1914.64            | 5286.90            | 4.698                          | 1621.76            | 7619.02            |
| A_68_P29455874 | chr14:22804989-22805033                           | NM_145459:3813     | Zfp503     | INSIDE                 | 6.806                                                        | 12.105                         | 640.93             | 7758.46            | 82.389                         | 599.62             | 49402.73           |
| A_68_P29455876 | chr14:22805255-22805299                           | NM_145459:3547     | Zfp503     | INSIDE                 | 2.388                                                        | 4.903                          | 8384.65            | 41113.51           | 11.710                         | 5045.05            | 59078.81           |
| A_68_P29455871 | chr14:22804612-22804656                           | NM_145459:4189     | Zfp503     | INSIDE                 | 2.022                                                        | 3.937                          | 2979.74            | 11729.99           | 7.960                          | 2329.53            | 18543.92           |
| A_68_P29455867 | chr14:22804205-22804249                           | NM_145459:4597     | Zfp503     | INSIDE                 | 1.705                                                        | 2.108                          | 6999.60            | 14757.56           | 3.594                          | 5362.43            | 19273.32           |
| A_68_P25051309 | chr7:36588072-36588116                            | NM_177739:-86      | Zfp507     | PROMOTER               | 1.670                                                        | 3.097                          | 459.55             | 1423.12            | 5.172                          | 360.31             | 1863.39            |
| A_68_P25581873 | chr7:147222902-147222946                          | NM_027201:635      | Zfp511     | INSIDE                 | 1.804                                                        | 2.157                          | 2142.84            | 4623.02            | 3.891                          | 1510.89            | 5879.04            |
| A_68_P31879479 | chr18:83126499-83126543                           | NM_001177464:42497 | Zfp516     | INSIDE                 | 2.098                                                        | 9.025                          | 2560.18            | 23104.84           | 18.937                         | 2102.69            | 39819.04           |
| A_68_P31086417 | chr17:21669593-21669637                           | NM_144515:-2888    | Zfp52      | PROMOTER               | 1.557                                                        | 2.758                          | 2058.15            | 5676.25            | 4.293                          | 1665.77            | 7151.85            |
| A_68_P31120939 | chr17:28314640-28314684                           | NM_172617:300      | Zfp523     | INSIDE                 | 1.524                                                        | 2.620                          | 5376.46            | 14087.07           | 3.993                          | 3975.25            | 15871.32           |
| A_68_P31086236 | chr17:21626256-21626300                           | NM_013843:327      | Zfp53      | INSIDE                 | 1.652                                                        | 1.868                          | 1741.74            | 3253.80            | 3.086                          | 1520.40            | 4691.44            |
| A_68_P31782005 | chr18:65740650-65740694                           | NM_207255:789      | Zfp532     | INSIDE                 | 1.804                                                        | 4.365                          | 4337.80            | 18933.93           | 7.874                          | 3516.66            | 27688.88           |
| A_68_P25504683 | chr7:134376847-134376891                          | NM_146201:-88      | Zfp553     | DIVERGENT_PROMOTER     | 1.562                                                        | 6.493                          | 500.43             | 3249.53            | 10.143                         | 454.10             | 4605.86            |
| A_68_P25008269 | chr7:25866719-25866763                            | NM_175477:4476     | Zfp574     | INSIDE                 | 1.779                                                        | 4.221                          | 4048.08            | 17085.21           | 7.509                          | 3275.89            | 24598.20           |
| A_68_P24951794 | chr7:5004858-5004902                              | NM_026900:1747     | Zfp580     | INSIDE                 | 1.953                                                        | 11.439                         | 6702.51            | 76672.71           | 22.347                         | 4388.05            | 98058.91           |
| A_68_P30084544 | chr15:25914715-25914759                           | NM_144523:616      | Zfp622     | INSIDE                 | 1.615                                                        | 2.547                          | 2462.55            | 6272.56            | 4.112                          | 2001.95            | 8232.98            |
| A_68_P21844247 | chr2:168760922-168760966                          | NM_009564:20143    | Zfp64      | INSIDE                 | 1.844                                                        | 7.758                          | 353.32             | 2740.99            | 14.308                         | 325.64             | 4659.13            |
| A_68_P23962878 | chr5:107125443-107125487                          | NM_026856:385      | Zfp644     | INSIDE                 | 1.982                                                        | 5.364                          | 4973.92            | 26679.75           | 10.633                         | 4228.15            | 44958.50           |
| A_68_P26350251 | chr9:21860554-21860598                            | NM_177318:15213    | Zfp653     | INSIDE                 | 1.500                                                        | 2.831                          | 1323.23            | 3746.33            | 4.247                          | 1055.78            | 4483.80            |
| A_68_P24063275 | chr5:125343770-125343814                          | NM_001081750:718   | Zfp664     | INSIDE                 | 1.643                                                        | 3.056                          | 2191.66            | 6698.03            | 5.021                          | 1670.90            | 8389.72            |
| A_68_P27830380 | chr11:58136423-58136467                           | NM_178761:404      | Zfp672     | INSIDE                 | 1.629                                                        | 4.207                          | 4136.22            | 17401.81           | 6.852                          | 3392.02            | 23243.79           |
| A_68_P22341853 | chr3:94819143-94819187                            | NM_030074:-4       | Zfp687     | PROMOTER               | 1.962                                                        | 4.849                          | 808.04             | 3917.86            | 9.511                          | 672.38             | 6395.29            |
| A_68_P25505623 | chr7:134587980-134588024                          | NM_175163:4670     | Zfp689     | INSIDE                 | 2.195                                                        | 6.386                          | 1233.58            | 7878.17            | 14.018                         | 1140.67            | 15989.94           |
| A_68_P32603687 | chrX:109715096-109715140                          | NM_177747:984      | Zfp711     | INSIDE                 | 2.086                                                        | 6.119                          | 1571.52            | 9616.70            | 12.767                         | 999.78             | 12764.45           |
| A_68_P32603677 | chrX:109714158-109714202                          | NM_177747:46       | Zfp711     | INSIDE                 | 1.557                                                        | 2.212                          | 329.82             | 729.70             | 3.444                          | 225.13             | 775.44             |
| A_68_P25505272 | chr7:134489178-134489222                          | NM_146202:-372     | Zfp768     | PROMOTER               | 2.021                                                        | 1.770                          | 593.28             | 1049.86            | 3.577                          | 545.91             | 1952.67            |
| A_68_P25504790 | chr7:134397531-134397575                          | NM_177362:9513     | Zfp771     | INSIDE                 | 1.532                                                        | 1.867                          | 1286.01            | 2400.51            | 2.860                          | 1137.32            | 3252.78            |
| A_68_P24425393 | chr6:47974535-47974579                            | NM_001081382:23557 | Zfp777     | INSIDE                 | 1.551                                                        | 3.239                          | 550.43             | 1782.89            | 5.025                          | 529.21             | 2659.20            |
| A_68_P24954294 | chr7:6107601-6107645                              | NM_001013012:-49   | Zfp787     | PROMOTER               | 1.967                                                        | 4.333                          | 5409.37            | 23436.41           | 8.522                          | 4239.71            | 36128.89           |
| A_68_P24954136 | chr7:6083754-6083798                              | NM_001013012:23797 | Zfp787     | INSIDE                 | 1.711                                                        | 3.719                          | 1970.48            | 7328.70            | 6.364                          | 1617.93            | 10296.73           |
| A_68_P24954292 | chr7:6107153-6107197                              | NM_001013012:399   | Zfp787     | INSIDE                 | 1.622                                                        | 1.848                          | 928.31             | 1715.63            | 2.997                          | 1187.74            | 3560.21            |
| A_68_P24954289 | chr7:6106868-6106913                              | NM_001013012:683   | Zfp787     | INSIDE                 | 1.579                                                        | 3.682                          | 2148.52            | 7910.72            | 5.812                          | 1736.73            | 10094.57           |
| A_68_P31147212 | chr17:32966976-32967020                           | NM_177359:195      | Zfp799     | INSIDE                 | 2.230                                                        | 7.205                          | 2501.50            | 18022.65           | 16.067                         | 1776.93            | 28549.85           |
| A_68_P31148785 | chr17:33495528-33495572                           | NM_207541:273      | Zfp81      | INSIDE                 | 1.787                                                        | 2.112                          | 3403.81            | 7188.31            | 3.773                          | 2674.22            | 10090.12           |
| A_68_P25029775 | chr7:30857776-30857820                            | NM_177889:44       | Zfp82      | INSIDE                 | 1.702                                                        | 2.524                          | 1477.15            | 3728.99            | 4.296                          | 1209.50            | 5196.36            |
| A_68_P25992690 | chr8:81636588-81636632                            | NM_178267:84275    | Zfp827     | INSIDE                 | 2.710                                                        | 18.337                         | 18328.51           | 336097.60          | 49.688                         | 10239.56           | 508780.30          |
| A_68_P25992689 | chr8:81636479-81636523                            | NM_178267:84165    | Zfp827     | INSIDE                 | 2.072                                                        | 12.786                         | 10404.52           | 133037.20          | 26.490                         | 6169.84            | 163436.70          |
| A_68_P25992691 | chr8:81636666-81636710                            | NM_178267:84353    | Zfp827     | INSIDE                 | 1.545                                                        | 9.692                          | 5183.46            | 50237.54           | 14.970                         | 3215.13            | 48129.18           |
| A_68_P25670894 | chr8:13870055-13870099                            | NM_181854:436      | Zfp828     | INSIDE                 | 1.587                                                        | 1.726                          | 1360.09            | 2347.50            | 2.740                          | 1066.27            | 2921.49            |
| A_68_P24951673 | chr7:4981991-4982035                              | NM_001033383:10035 | Zfp865     | INSIDE                 | 1.668                                                        | 3.797                          | 2167.70            | 8231.60            | 6.333                          | 1920.71            | 12163.49           |
| A_68_P31147009 | chr17:32924787-32924831                           | NM_172458:424      | Zfp871     | INSIDE                 | 1.948                                                        | 4.509                          | 5798.67            | 26143.80           | 8.782                          | 5006.12            | 43964.92           |
| A_68_P31087861 | chr17:22058135-22058179                           | NM_001199048:41275 | Zfp942     | DOWNSTREAM             | 1.693                                                        | 6.043                          | 8521.82            | 51496.41           | 10.228                         | 6647.56            | 67992.19           |
| A_68_P31090923 | chr17:23013560-23013604                           | NM_001110254:-9481 | Zfp945     | PROMOTER               | 1.524                                                        | 3.867                          | 1295.52            | 5010.37            | 5.892                          | 1139.64            | 6715.07            |
| A_68_P25947840 | chr8:72273755-72273799                            | NM_001200023:85    | Zfp963     | INSIDE                 | 1.510                                                        | 2.939                          | 4922.90            | 14468.46           | 4.439                          | 3866.13            | 17161.24           |

| ProbeName      | Target position of probe on CpG island microarray | TargetID          | GeneSymbol | CpG island Description | Ratio of relative methylation (TiO <sub>2</sub> -NP/Vehicle) | Sham group                     |                    |                    | TiO <sub>2</sub> -H group      |                    |                    |
|----------------|---------------------------------------------------|-------------------|------------|------------------------|--------------------------------------------------------------|--------------------------------|--------------------|--------------------|--------------------------------|--------------------|--------------------|
|                |                                                   |                   |            |                        |                                                              | Relative methylation (Cy5/Cy3) | Cy3 signal (Input) | Cy5 signal (MeDIP) | Relative methylation (Cy5/Cy3) | Cy3 signal (Input) | Cy5 signal (MeDIP) |
| A_68_P25947613 | chr8:72178336-72178380                            | NM_001177527:-96  | Zfp964     | PROMOTER               | 1.934                                                        | 5.353                          | 2590.06            | 13863.49           | 10.354                         | 1969.80            | 20395.55           |
| A_68_P30160398 | chr15:40486792-40486836                           | NM_011766:227     | Zfpm2      | INSIDE                 | 1.934                                                        | 4.138                          | 7704.09            | 31875.86           | 8.003                          | 5311.51            | 42509.08           |
| A_68_P32537531 | chrX:91368428-91368472                            | NM_001044386:296  | Zfx        | INSIDE                 | 1.616                                                        | 5.107                          | 1044.72            | 5335.77            | 8.253                          | 681.29             | 5622.91            |
| A_68_P32537532 | chrX:91368506-91368550                            | NM_001044386:218  | Zfx        | INSIDE                 | 1.572                                                        | 4.782                          | 3575.38            | 17099.25           | 7.520                          | 2303.95            | 17325.96           |
| A_68_P30243544 | chr15:57525714-57525758                           | NM_199449:-485    | Zhx2       | PROMOTER               | 1.907                                                        | 2.755                          | 1625.86            | 4478.68            | 5.253                          | 1339.99            | 7039.37            |
| A_68_P30243549 | chr15:57526400-57526444                           | NM_199449:201     | Zhx2       | INSIDE                 | 1.578                                                        | 5.586                          | 1314.57            | 7343.29            | 8.817                          | 1022.93            | 9019.07            |
| A_68_P26721663 | chr9:91278946-91278990                            | NM_009576:15159   | Zic4       | INSIDE                 | 1.721                                                        | 2.922                          | 909.30             | 2656.60            | 5.028                          | 697.42             | 3506.49            |
| A_68_P32674751 | chrX:131543547-131543591                          | NM_175446:180     | Zmat1      | INSIDE                 | 2.422                                                        | 19.742                         | 5109.23            | 100864.00          | 47.809                         | 3031.64            | 144939.50          |
| A_68_P32564024 | chrX:98615209-98615253                            | NM_001177985:23   | Zmym3      | INSIDE                 | 1.891                                                        | 2.856                          | 582.27             | 1662.67            | 5.400                          | 372.25             | 2010.15            |
| A_68_P23282958 | chr4:126644783-126644827                          | NM_001114399:363  | Zmym4      | INSIDE                 | 1.734                                                        | 6.315                          | 4207.22            | 26569.82           | 10.948                         | 3446.79            | 37736.43           |
| A_68_P21826276 | chr2:165671382-165671427                          | NM_027230:38784   | Zmynd8     | INSIDE                 | 1.699                                                        | 7.060                          | 678.38             | 4789.61            | 11.993                         | 547.10             | 6561.33            |
| A_68_P21911521 | chr2:181327466-181327510                          | NM_001164597:-322 | Znf512b    | PROMOTER               | 1.765                                                        | 3.573                          | 1536.04            | 5488.81            | 6.305                          | 1321.95            | 8335.16            |
| A_68_P21911518 | chr2:181326975-181327019                          | NM_001164597:170  | Znf512b    | INSIDE                 | 1.689                                                        | 8.697                          | 1229.90            | 10697.01           | 14.691                         | 829.14             | 12180.90           |
| A_68_P31932456 | chr19:6060898-6060957                             | NM_013859:-279    | Znhit2-ps  | PROMOTER               | 1.863                                                        | 9.177                          | 22684.11           | 208180.60          | 17.096                         | 12764.16           | 218213.80          |
| A_68_P27563479 | chr11:5344842-5344886                             | NM_001080924:-14  | Znrf3      | PROMOTER               | 1.574                                                        | 1.826                          | 2713.11            | 4953.86            | 2.874                          | 2271.20            | 6527.31            |
| A_68_P28057142 | chr11:98412381-98412425                           | NM_001166494:-8   | Zbp2       | DIVERGENT_PROMOTER     | 2.100                                                        | 7.127                          | 4869.52            | 34703.67           | 14.967                         | 3233.09            | 48389.12           |
| A_68_P32795839 | chrX:160396590-160396634                          | NM_009453:-14     | Zrsr2      | PROMOTER               | 1.750                                                        | 2.246                          | 2229.98            | 5007.44            | 3.929                          | 1201.96            | 4722.33            |
| A_68_P23231372 | chr4:116550094-116550138                          | NM_001029912:110  | Zswim5     | INSIDE                 | 1.866                                                        | 3.471                          | 2852.81            | 9901.03            | 6.476                          | 2279.39            | 14761.92           |
| A_68_P29308210 | chr13:108681440-108681484                         | NM_145456:-1204   | Zswim6     | PROMOTER               | 1.530                                                        | 3.652                          | 1260.57            | 4603.49            | 5.589                          | 1054.22            | 5891.68            |
| A_68_P29308205 | chr13:108680813-108680857                         | NM_145456:-576    | Zswim6     | PROMOTER               | 2.259                                                        | 1.450                          | 1072.99            | 1555.79            | 3.276                          | 830.04             | 2719.13            |
| A_68_P24631961 | chr6:90319416-90319460                            | NM_030260:-49     | Zxdc       | PROMOTER               | 1.853                                                        | 2.577                          | 1348.62            | 3475.42            | 4.775                          | 1139.85            | 5442.93            |
| A_68_P23195047 | chr4:107889859-107889903                          | NM_001167936:647  | Zyg11a     | INSIDE                 | 1.926                                                        | 5.752                          | 19495.88           | 112147.10          | 11.079                         | 13845.63           | 153397.70          |
| A_68_P22650336 | chr3:152058904-152058948                          | NM_001080755:-47  | Zzz3       | PROMOTER               | 1.639                                                        | 2.012                          | 590.54             | 1188.06            | 3.298                          | 679.08             | 2239.34            |
